# Supplementary material for: Discovery and characterization of Alu repeat sequences via precise local read assembly
Source: PubMed Central journal article supplement (PMC4666360; doi:10.1093/nar/gkv1089), 2015-10-25

siteID: chr1\_104574495 Scaffitg1 - Breakpoint: chr1:104574469

chr1:104574428-104574528

Overlap Length: 13 INS size: 289 Genotyped: Yes

```
left  CAAAGCTCCTATTA-----AAAGTAGTTTG-TTGCTTTT-TGATCC-----CTTGTAAATTTTTT
chrom CAAAGCTCCTATTA-----AAAGTAGTTTG-TTGCTTTT-TGATCC-----CTTGTAAATTTTTT
right CCGCCCGCCTCGGCCTCCCAAAGTGCTGGGATTACAGGCGTGAGCCACCGCGCCCGGCCCTTGTAAATTTTTT
      *1111*1***1111111111*****11*11*1**1*11111***1**11111111111*1*****
```

```
left  TTTTTTTTTTGGAGACGGAGTCTCGCTCTGTCGCC-CAGGCTGGAGTGCAGTGGCGGGATCTC-GGCTCA
chrom TTTATTATT-----AACTATAAAGCATCATG--GGTATAGAGTGTC----TCTCTGGGTTT
right TTATTATT-----AACTATAAAGCATCATG--GGTATAGAGTGTC----TCTCTGGGTTT
      **2**2**2222222222222222**2*222**22**2*22**22*22**22**22**22**22**22**22
```

Other Simple Repeat Low Complexity DNA LTR LINE SINE

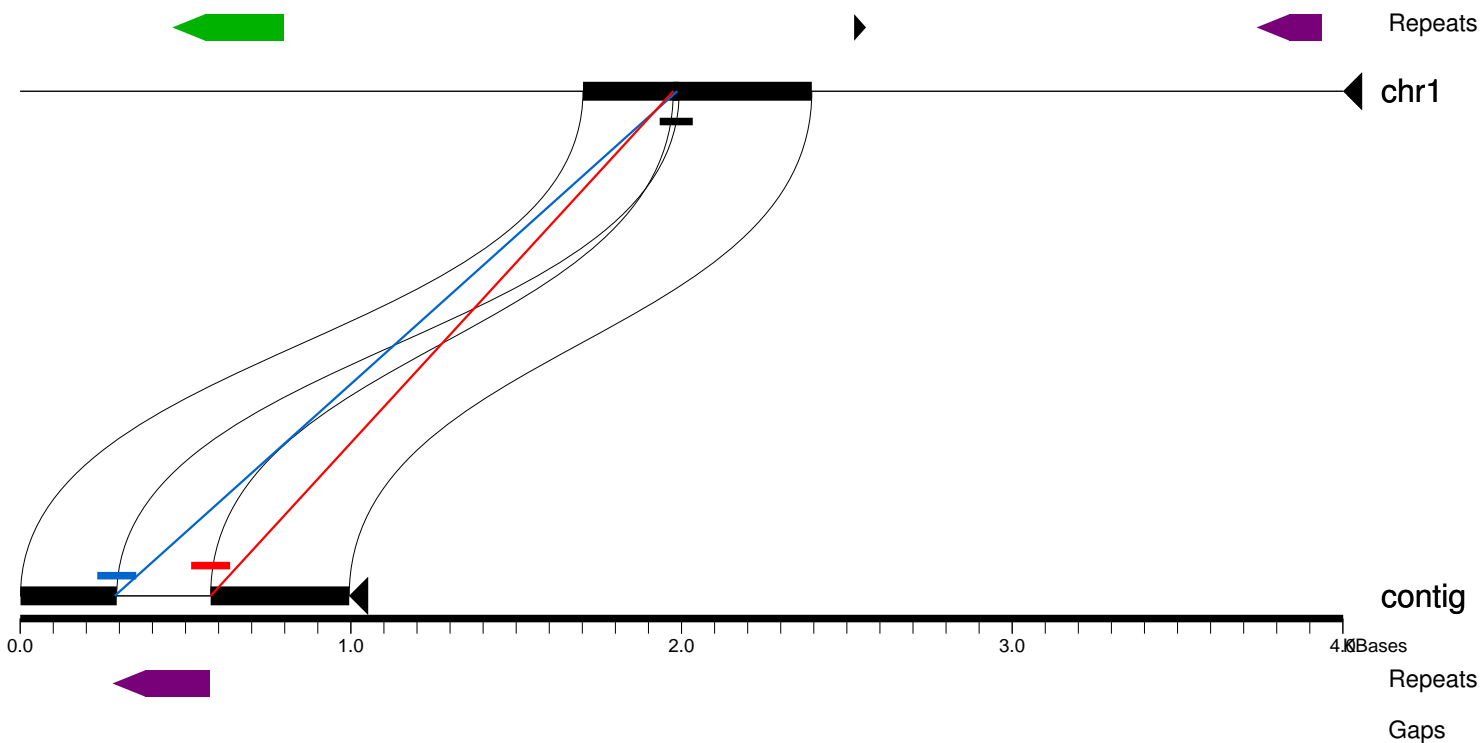

siteID: chr1\_105054078 Scaffitg11 + Breakpoint: chr1:105054075

chr1:105053914-105054243

Overlap Length: 9 INS size: 433 Genotyped: No

```

left -----ATCAGAATGAGAAAAGAGAAATTTACTACAGATATTACAGATGTTAAGTGGATAATGAGAA
chrom  CATTTCCAATATCAGAATGAGAAAAGAGAAATTTACTACAGATATTACAGATGTTAAGTGGATAATGAGAA
right  NNNNNNNNNNNN-----AAAAA-----
        NNNNNNNNNNN111111111*1****1111111111111111111111111111111111111111111111
left  ATATTATGGACAATTTCTTTGCCAAAATTATTTCAACTTACATATAATTTAAAAAATTTCTACACAAAATTACCA
chrom  ATATTATGGACAATTTCTTTGCCAAAATTATTTCAACTTACATATAATTTAAAAAATTTCTACACAAAATTACCA
right  -----
        11111111111111111111111111111111111111111111111111111111111111111111111
left  AATTCATTTTTTTAGTGATAAGAATAGCCCTGGCCGGGCGCGGTGGC----TCACGCCTGTAATCCCAGCA
chrom  AATTCATTTTTTTAGTGATAAATAATAGCCCTATTTTTCAA-CTGTGTCACCTTCAGAAATGTA-TCCAAACT
right  -----
        1111111111111111111111111N******22222222*2***2*2222***2222***2***2*2*2
left  CTTTGGGAGGCC-----GAGGCGGGCGGATCACGAGGTCAGGAGATCGA-GACC--ATCCCGGCTAA
chrom  CGCCATGATTCACCTTACTATGATACAGGAATATTAATAGTTTCATACACTAGAAGATTGTATGAAGGTAA
right  CGCCATGATTCACCTTACTATGATACAGGAATATTAATAGTTTCATACACTAGAAGATTGTATGAAGG----
        *22222**22*222222222**22*2**222**2*22**2***22222*2**2**2222**222**N111
left  A-----ATGG-----TGAAACCCCGTCTCT- ACTAAA-----
chrom  AGGAATTAACACATGGAAAAGTCCTTGAAAATAGTATCTATCACATAATATGAG
right  -----
        1          1111          11111NNNNN111N1 11NN11
    
```

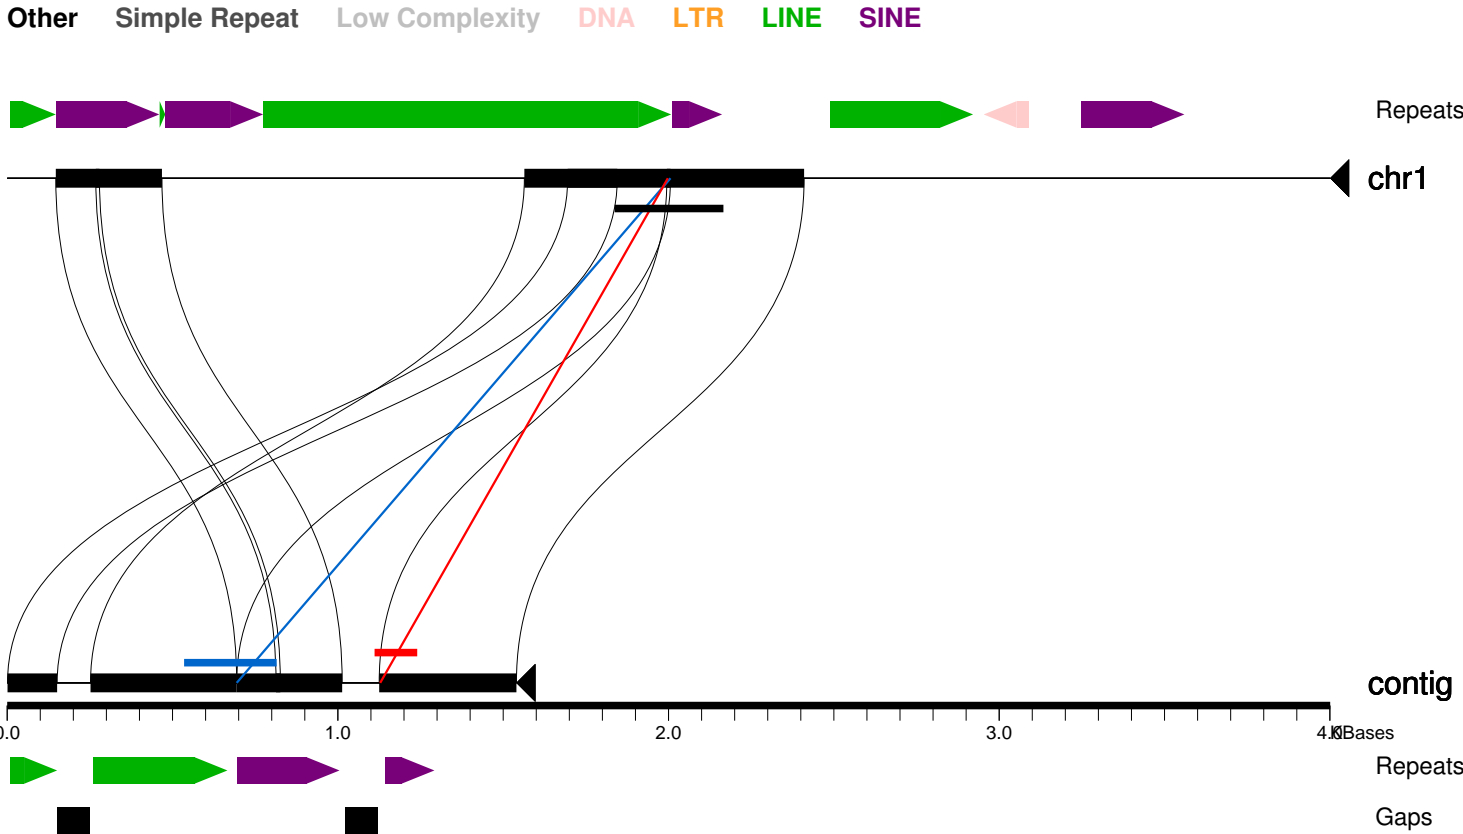



siteID: chr1\_105138638 Scafftig2 + Breakpoint: chr1:105138642

chr1:105138602-105138701

Overlap Length: 9 INS size: 323 Genotyped: Yes

```
left      T-----TATTTCATTTAATTCCTTTTCATTTTTTTAGTTAT-----GTGCCATTTTTTT
chrom     T-----TATTTCATTTAATTCCTTTTCATTTTTTTAGTTAT-----GTGCCATTTTTTT
right    TCCACCCGCCTCGGCCTCCCAAAGTGCTGGGATTACAGGCGTG-AGCCACCGCGCCCGGCCTCATTTTTTTA
          *11111111111111111111*11*1*11*11*1111**1**1111*11**11*111111111*11*****2
```

```
left      TTTTTTTTTTTTTTTTTTTTTTTTTTTTTTTTTTTTGGAGACGGAGTCTCGCTCTGTTGCCAGGCCGGAC
chrom     TCCTATTATTAATAACACCTTTTTTAAAAGTCAAATGTGT--GATTA-----CTATTT-----
right    TCCTATTATTAATAACACCTTTTTTAAAAGTCAAATGTGT--GATTA-----CTATTT-----
          *22*2**2**22*222222*****22222*2222**2*222**2*222222**2**222222222222
```

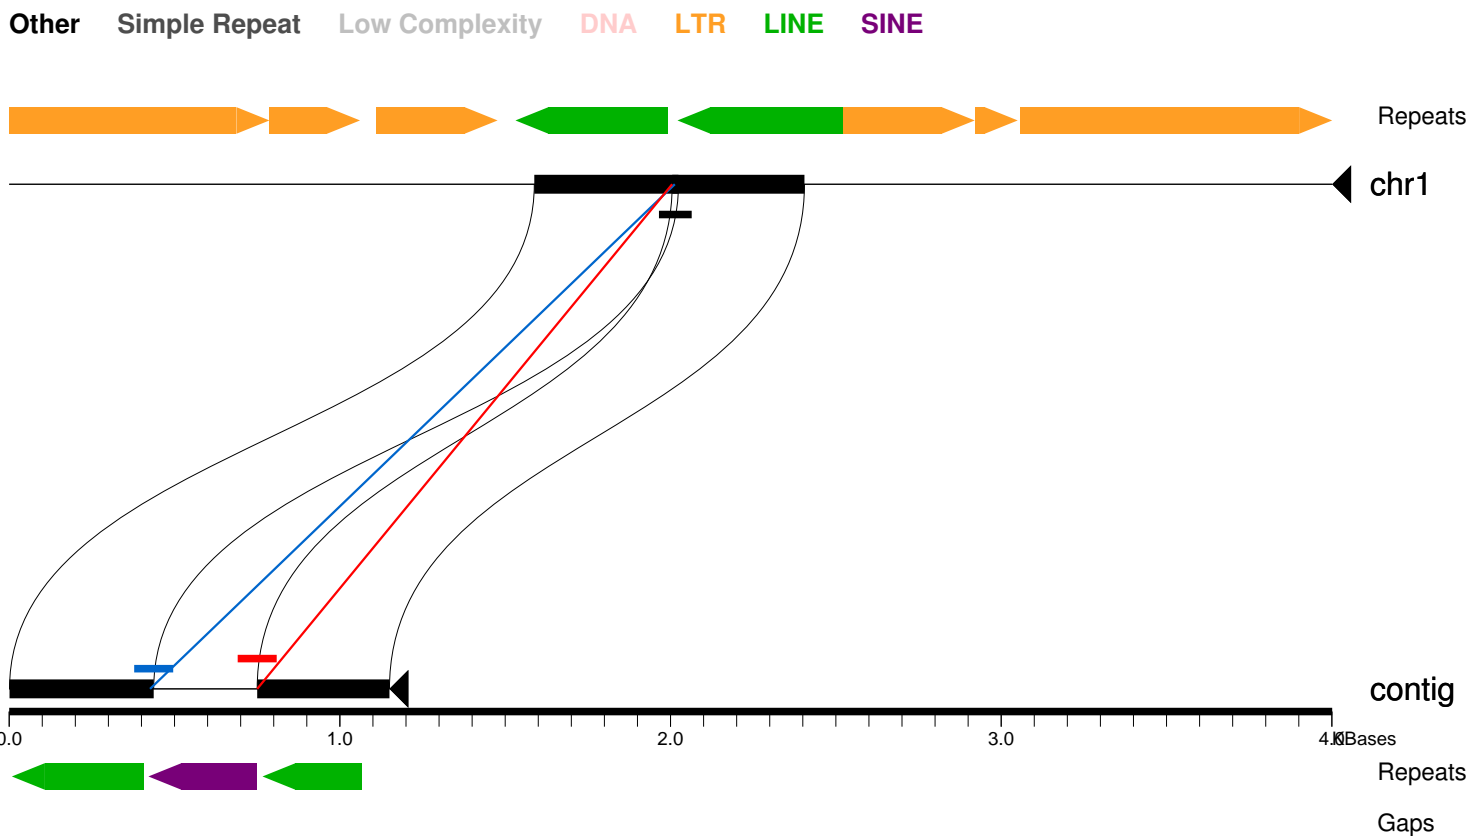

siteID: chr1\_105231124 Scafftig2 + Breakpoint: chr1:105231104

chr1:105231052-105231163

Overlap Length: 8 INS size: 127 Genotyped: Yes

```
left  GGAAATGA-TGAAACTGAAGCAAAAAAAAAAATTAAGGCA-----CTTTATCAAGGTAAC-AGTTTTTTT
chrom GGAAATGA-TGAAACTGAAGCAAAAAAAAAAATTAAGGCA-----CTTTATCAAGGTAAC-AGTATTTT
right TCGGCTCACTGCAAGCTCCGCCTCCCGGGTTCACGCCATTCTCCTGCCTCAGCCTCCCGAGTATTTT
      11111*1*1**1**11111**111111111*1*1*1**11111**111***111*11*1***2***222
```

```
left  TTTTTTTTTTTTTTTTTGAGACGGAGTCTCGCTCTGTTCGCCAGGCTGGAGTGCAGT-
chrom TAATGTCACATGGTAGTA-ATAGAGGCAGG-----GCTATGATTTAAACCCAGTA
right TAATGTCACATGGTAGTA-ATAGAGGCAGG-----GCTATGATTTAAACCCAGTA
      *22*2*2222*22*222*2*22***2*22*2222222**222*22*22*222***2
```

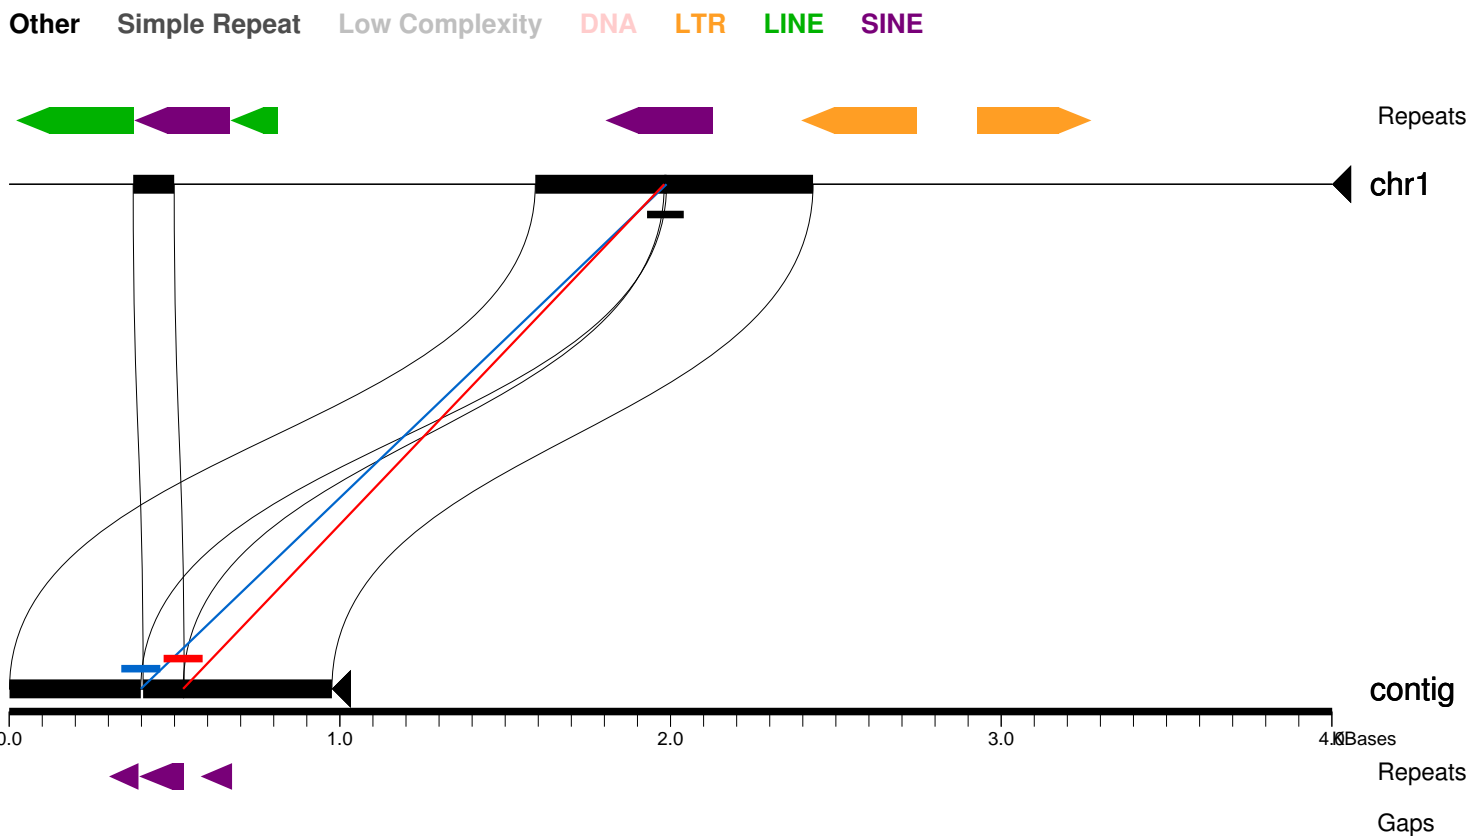

siteID: chr1\_106326564 Scaffitg3 + Breakpoint: chr1:106326575

chr1:106326415-106326761

Overlap Length: 27 INS size: 244 Genotyped: No

```

left  A-----AATGTGAAAAATAAG
chrom ACTACTAGGAATTG--ACTTCATATCTAAAGTAAGCAAAAATGCACCTTCTCTAAAAATGTGAAAAATAAG
right GCCACTACGCCCGCTAATTTTT-TGTATTTTTAGTAGAGACGGGGTT-TC----ACCGTT-----TTAG
12N2222N2NNNN2112N22NN2 2N22NNN2N22N2N2N2N2NN22 22 *11**111111*1**
  
```

```

left  CTCAACAATATGTGATTGGTTGATTTAATAATCTTAATTCCTCCATTAGTATTAGAAAATAATTTGGTT
chrom CTCAACAATATGTGATTGGTTGATTTAATAATCTTAATTCCTCCATTAGTATTAGAAAATAATTTGGTT
right CTGGGATGGTCTC-GATCTCCTGACCTCGTGATCCGCCCGCCTC-----GGC
**111*111*1*11***1111***11*11*1***111111***111111111111111111111111*11
  
```

```

left  CAACCAACGA-CTATGTAACCTTGCTTCTTTTTAAAAATATGAAACAATCCNNNNNNNNNN-----
chrom CAACCAACGA-CTATGTAACCTTGGCTTCTTTTTAAAAATATGAAACAATCCGCAGTGAAACATAAAATGTAA
right CTCCCAAAGTGTGGT-----GCTTCTTTTTAAAAATATGAAACAATCCGCAGTGAAACATAAAATGTAA
*11**11**11*11*11***111111*****1111111111111111111111111111111111111
  
```

```

left  -----
chrom AACTTTAGATTGTTGTAATCCGAGAGGATCACGCAGAAAGAACGATGTAAAGATAGCTGATGCTTTGATT
right AACTTTAGATTGTTGTAATCCGAGAGGATCACGCAGAAAGAACGATGTAAAGATANNNNNNNNNNNNNNNN
22222222222222222222222222222222222222222222222222222222222222NNNNNNNNNNNNNNNN
  
```

```

left  -----
chrom AACCTAAAAGGAATATTTTTAGCTTTTATTTAAGCTCTCAAAGATCTTTTACTTCTCTTTGGTATTATCA
right NNNNNNNNNNNNNNNNNNNNNNNNNNNNNNNNNNNNNNNNNNNNNNNNNNNNNNNNNNNNNNNNNNNNNNN
NNNNNNNNNNNNNNNNNNNNNNNNNNNNNNNNNNNNNNNNNNNNNNNNNNNNNNNNNNNNNNNNNNNNNN
  
```

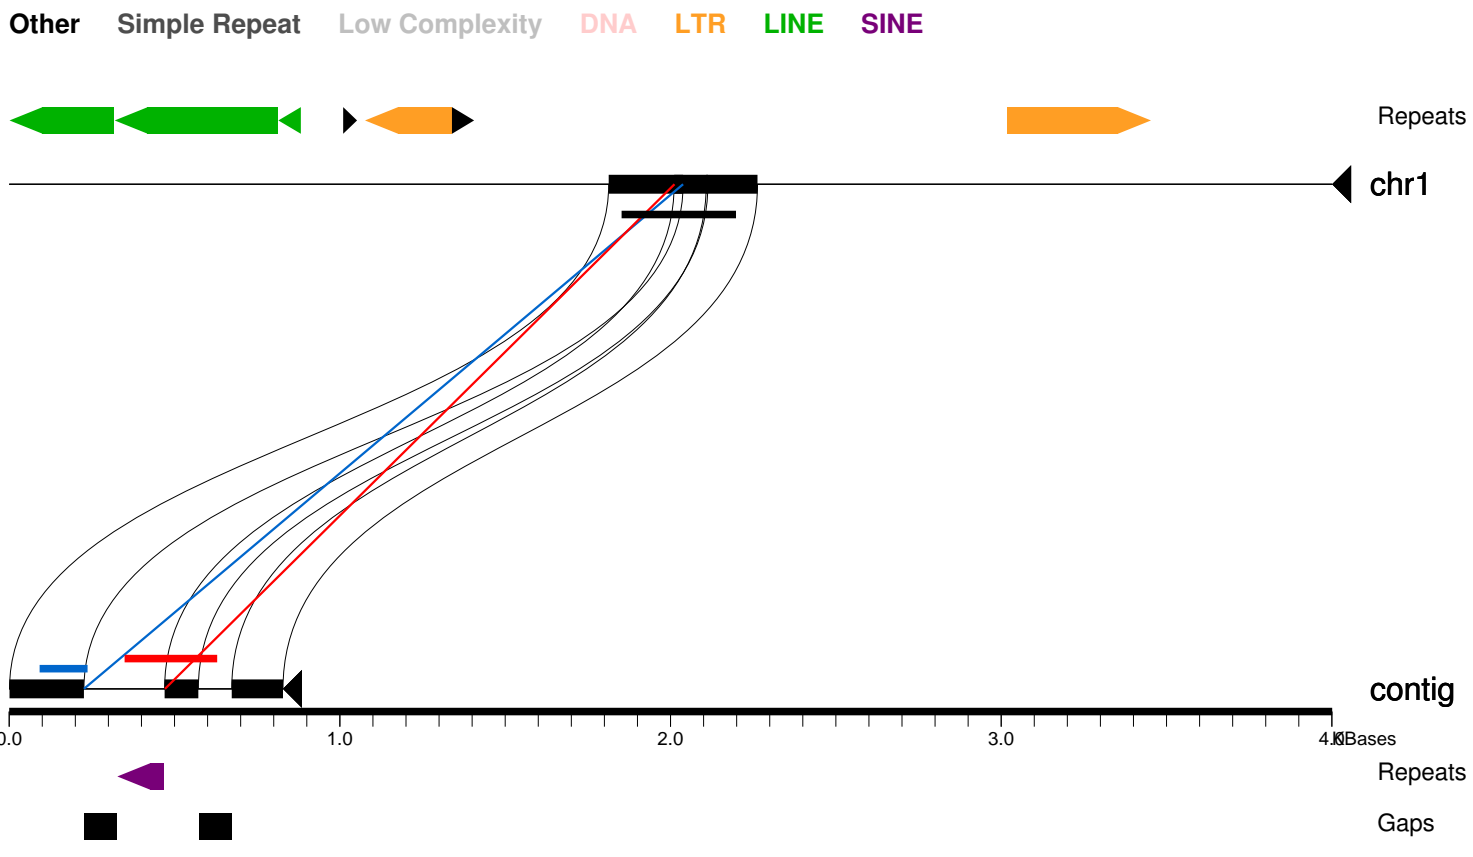

siteID: chr1\_108142475 Scaffoldig2 + Breakpoint: chr1:108142467

chr1:108142420-108142526

Overlap Length: 7 INS size: 304 Genotyped: Yes

```
left   GTGTTTCACA-GATAGAAGAGTAAACTAATATCA-----ATAATAAGAG-GATACTGAACTTTTT
chrom  GTGTTTCACA-GATAGAAGAGTAAACTAATACCA-----ATAACAAGAG-GATACTGAACTATTC
right  CCTGACCTCATGATCCACCCGCTCGGCCTCCCAAAGTGCTGGGATTACAGGCGTGAGCCTGAACCTATTC
       111111*1**1***11*111*11111111*12**1111111111**1*2*1*1*1**11*****2**2
```

```
left   TTTTTTTTTTTTTTTTTTTTTTTTTTTTTTTGAGACGGAGTCTCGCTCTGTCGCCAGGTCGGACT
chrom  TTAAGAAACAACCTCAAATCC-----ACAGA---TCACTCCTTACTTATAATAGACAA
right  TTAAGAAACAACCTCAAATCC-----ACAGA---TCACTCCTTACTTATAATAGACAA
       **2222222222*2222*2222222222**2**222**2***22*22222222*2*2222
```

Other Simple Repeat Low Complexity DNA LTR LINE SINE

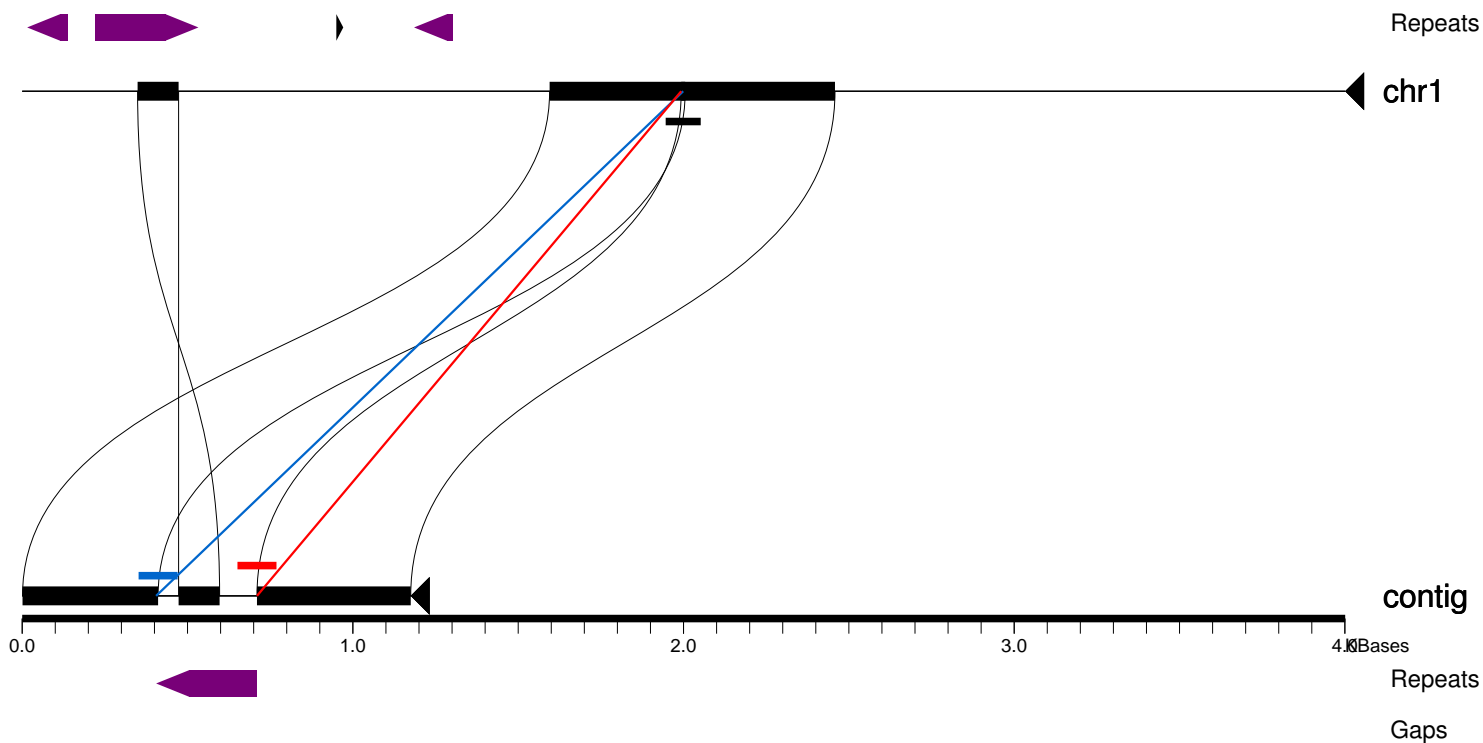

siteID: chr1\_112032275 Scaffoldig3 + Breakpoint: chr1:112032269

chr1:112032225-112032328

Overlap Length: 16 INS size: 322 Genotyped: Yes

```
left   GGGTGA-----AATATGGAGGCCTCCTACCATTGCTTGACGGAGGGCCTTGAAGAGCCTG
chrom  GGGTGA-----AATATGGAGGCCTCCTACCATTGCTTGACGGAGGGCCTTGAAGAGCCTG
right  GAGCGAGACTCCGTCTCAAAAAAAAAAAAAAAAAAAAAAAAAAAAAAAAAAAAAAAAAAATGAAGAGCCTG
      *1*1*11111111111111111111**1*111*1111*111*11*11111111*111*1111111******
```

```
left   AGGCTGCCGGGCGCGGTGGCTCACGCCTGTAATCCCAGCACTTTGGGAGGCCGAGGCGGGCGGA-
chrom  AGGCTTACCGTTA-GGAGGC-----CCTCTGTCCCTAGC-----TCCCACCCTACCTTAG
right  AGGCTTACCGTTA-GGAGGC-----CCTCTGTCCCTAGC-----TCCCACCCTACCTTAG
      ***22*2*2222**2***22222***2*222**2***222222222222**2*22*222*22*2
```

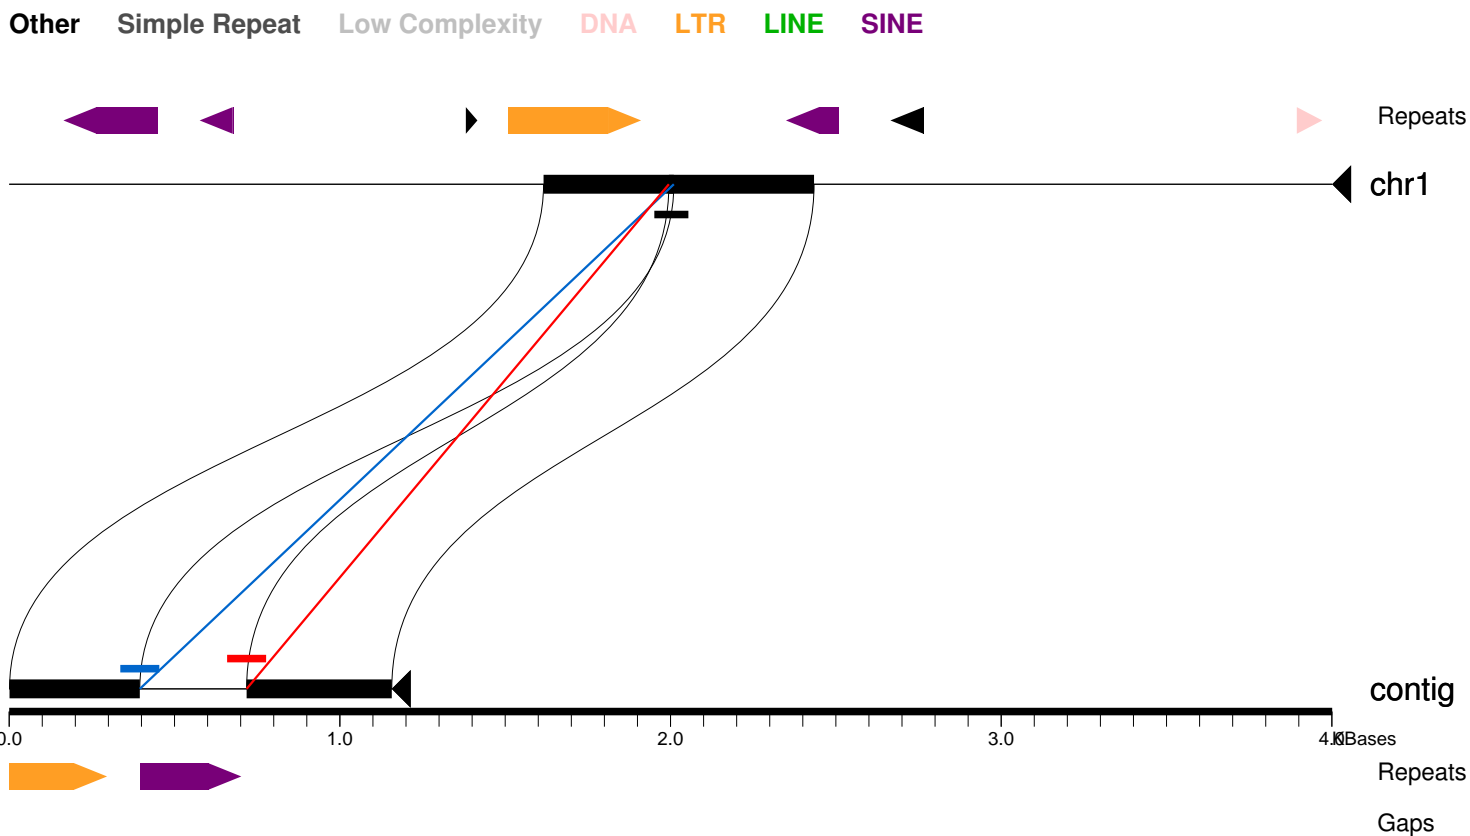





siteID: chr1\_112992012 Scafftig9 - Breakpoint: chr1:112991995

chr1:112991835-112992169

Overlap Length: 15 INS size: 302 Genotyped: Yes

```
left -----GCCTGATACTTTCTTGTTCAGCTGCCAGTTTTTTCACAGTAATTC AATTTGGGACATCTCA
chrom TTTATAAATTATGCCTGATACTTTCTTGTTCAGCTGCCAGTTTTTTCACAGTAATTC AATTTGGGACATCTCA
right TTTAGTA-----GAGACGGGGTT-TCA----CCA--TTT TAGCCGGGATGGTCTCG----ATCTC-
2222NN2 1111**1**1111**1***1111***11***11**1*11**1111*1*1111*****1
```

```
left CGGGTATCAAAAAGCCCCCTTAGTTTATGTAAGAGCCAGGAGATAAAAAAGAAAAACACAGCT--TATTGCA
chrom CGGGTATCAAAAAGCCCCCTTAGTTTATGTAAGAGCCAGGAGATAAAAAAGAAAAACACAGCT--TATTGCA
right CTGACCTCGTGATCCGCC-----GCCTCGGCCTCCCAAAGT-----GCTGGGATTACA
*1*111**111*11*1**1111111111111111***11*111*111***111111111***111***1**
```

```
left AATGTTAAGTTTAGAGAACGTGCCAGACACGTTATT-----TTTTTTTTT-----
chrom AATGTTAAGTTTAGAGAACGTGCCAGACACGTTATTAAAGACAGCATTTCTTCTTGATATGTC ACTCCAA
right GGCGTGAGCCACCGCGCCCGGCCAGACACGTTATTAAAGACAGCATTTCTTCTTGATATGTC ACTCCAA
111**1*1111111*1*11**11*****22222222***2**2**222222222222222
```

```
left -----TTTTTTTTTTTTTTGAGACGGAG-----TCTCGCTCTG-----TCGCCAGGCTGGAGTGCAGTG
chrom AACACTTTGTATGTTTTTTTCAGTTCTTGATCATTCAAACCTTTGGGGTTTGGCCAAGCTTGTAGCTGACGG
right AACACTTTGTATGTTTTTTTCAGTTCTTGATCATTCAAACCTTTGGGGTTTGGCCAAGCTTGTAGCTGACGG
222222**2*2*2*****2**22222*22222**222**2**22222*2***2**22**2**222*22*
```

```
left GCAGGATCTCG---GCTCACTGCAAGCTCCGCCCTCCCGGGTTCACGCCATTCTCTCTGC
chrom GAGTGTCTCTATTTGCTTACTT-AAGAGATAAAATAAAAAAGATTAA-CAGGTATTTGAG
right GAGTGTCTCTATTTGCTTACTT-AAGAGATAAAATAAAAAAGATT-----
*222*2***22222***2***22**2222222*22222*2*21N21NNN1N1NNNNN
```

Other Simple Repeat Low Complexity DNA LTR LINE SINE

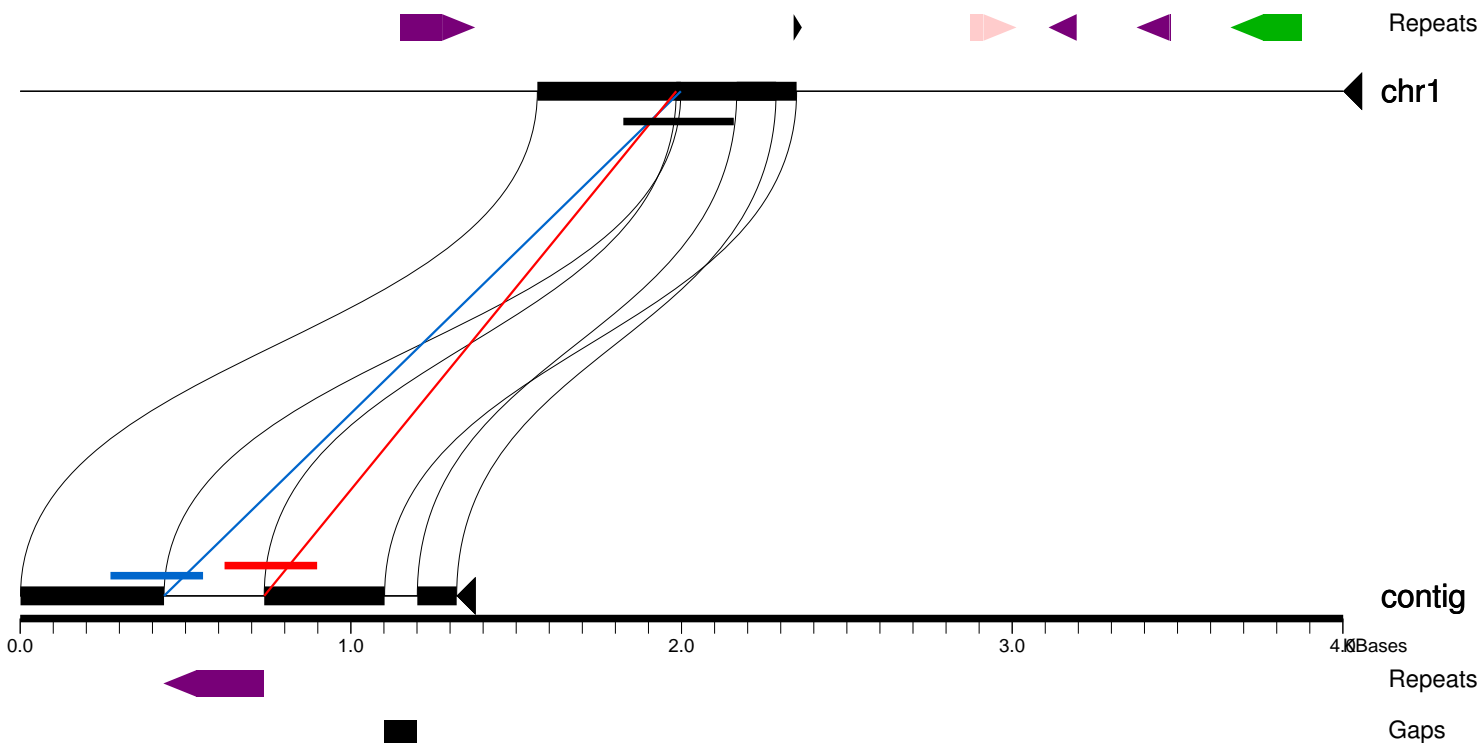



siteID: chr1\_116983552 Scafftig2 + Breakpoint: chr1:116983560

chr1:116983503-116983619

Overlap Length: 3 INS size: 414 Genotyped: No

```
left  TGGGAGTTCTAAGTCTCC-ACTGTGCCTCCACT-----GACAACCTCCTGGCTCGGTGAGGTAGGNNN
chrom TGGGAGTTCTAAGTCTCC-ACTGTGCCTCCACT-----GACAACCTCCTGGCTCGGTGAGGTAGGTTG
right CCGC----CTCGGCCTCCCAAAGTGTCTGGGATTACAGGCCTGAGCCACCGCGCCCGCCTACC-GGGTTG
      11*111111**11*1****1*11****1111*1*111111*11*1**1**11**1***1111111***222
```

```
left  NNNNNNNNNNNNNNNNNNNNNNNNNNNNNNNNNNNNNNNNNNNNNNNNNNNNNNNNNNNNNNNNNNNNNNN
chrom CTTCTTACTGATCTCCACATGGCCACCACAGGCACCATGGGGGTGAATGGCTCT--
right CTTCTTACTGATCTCCACATGGCCACCACAGGCACCATGGGGGTGAATGGCTCT--
      22222222222222222222222222222222222222222222222222222222222222222222
```

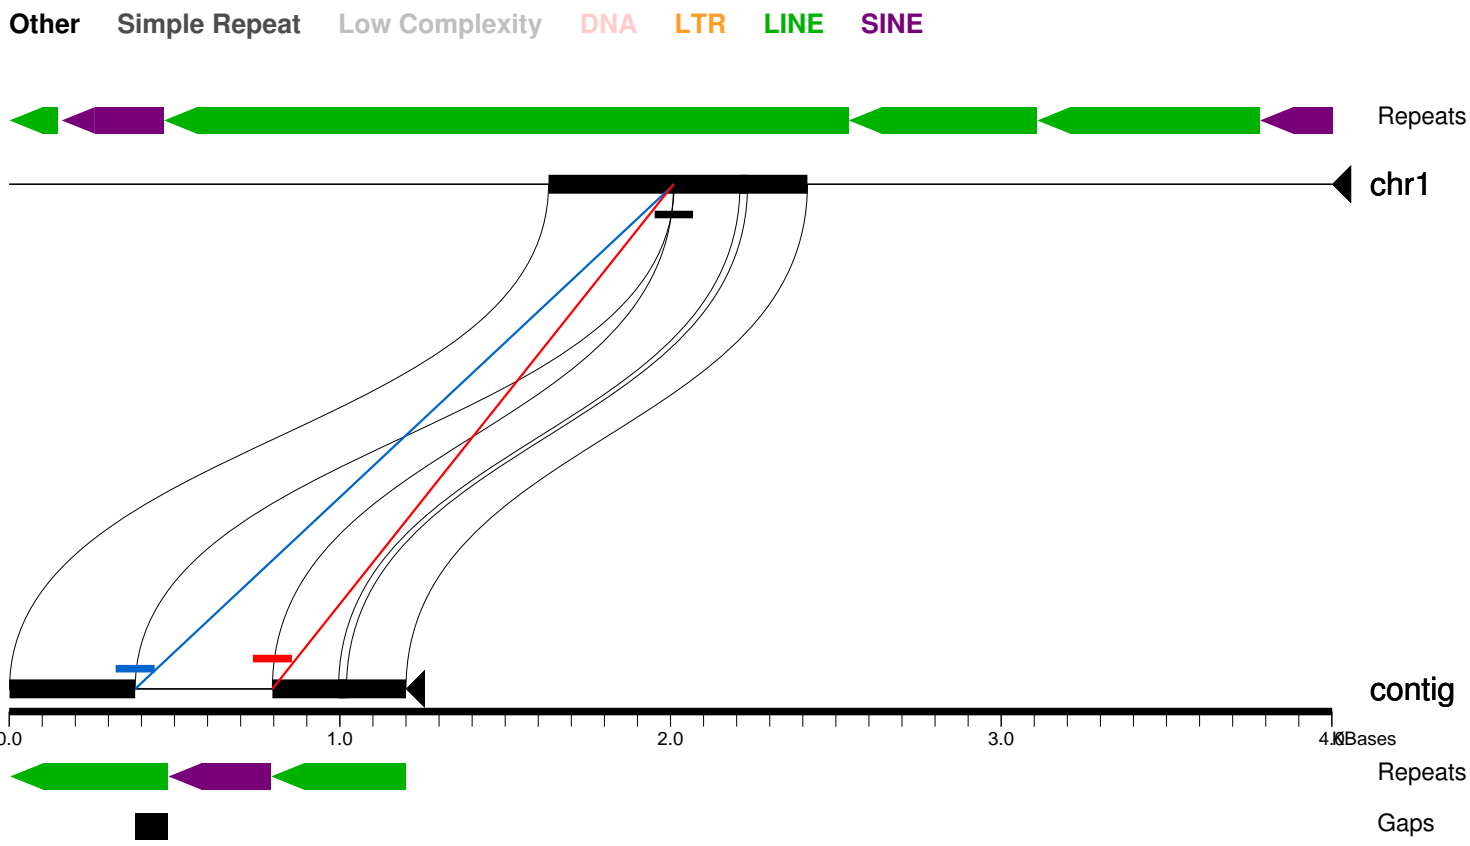



siteID: chr1\_119080710 Scafftig2 + Breakpoint: chr1:119080692

chr1:119080645-119080751

Overlap Length: 13 INS size: 311 Genotyped: Yes

```
left  AAG-----CTACCAAAG--ATTTAACGACCAGCTTAAAAGATTCTTTAATATTAGCAACCAGCT
chrom AAG-----CTACCAAAG--ATTTAACGACCAGCTTAAAAGATTCTTTAATATTAGCAACCAGCT
right CCGCCCGCCTCGGCCTCCCAAAGTGCTGGGATTACAGGCGTGAGCCAC-CGCGCCCGGCCGCAACCAGCT
      11*1111111111111111**1*****111*111*11**11**1*1*111*11*111111111111*****
```

```
left  TTTTTTTTTTTTTTTTTTTTTTTTTTTTTTTTTTTTTTGGAGACGGAGTCTCGCTCTGTCGCCCAGGC
chrom TTTATAAGCTGGTGTGAGCC-----AGCTCCAGCATGCCACTGTGTAAATCCAAT
right TTTATAAGCTGGTGTGAGCC-----AGCTCCAGCATGCCACTGTGTAAATCCAAT
      **2*2222*22*2*22222222222222222222*222*2*22*22*2**2***2222*2222
```

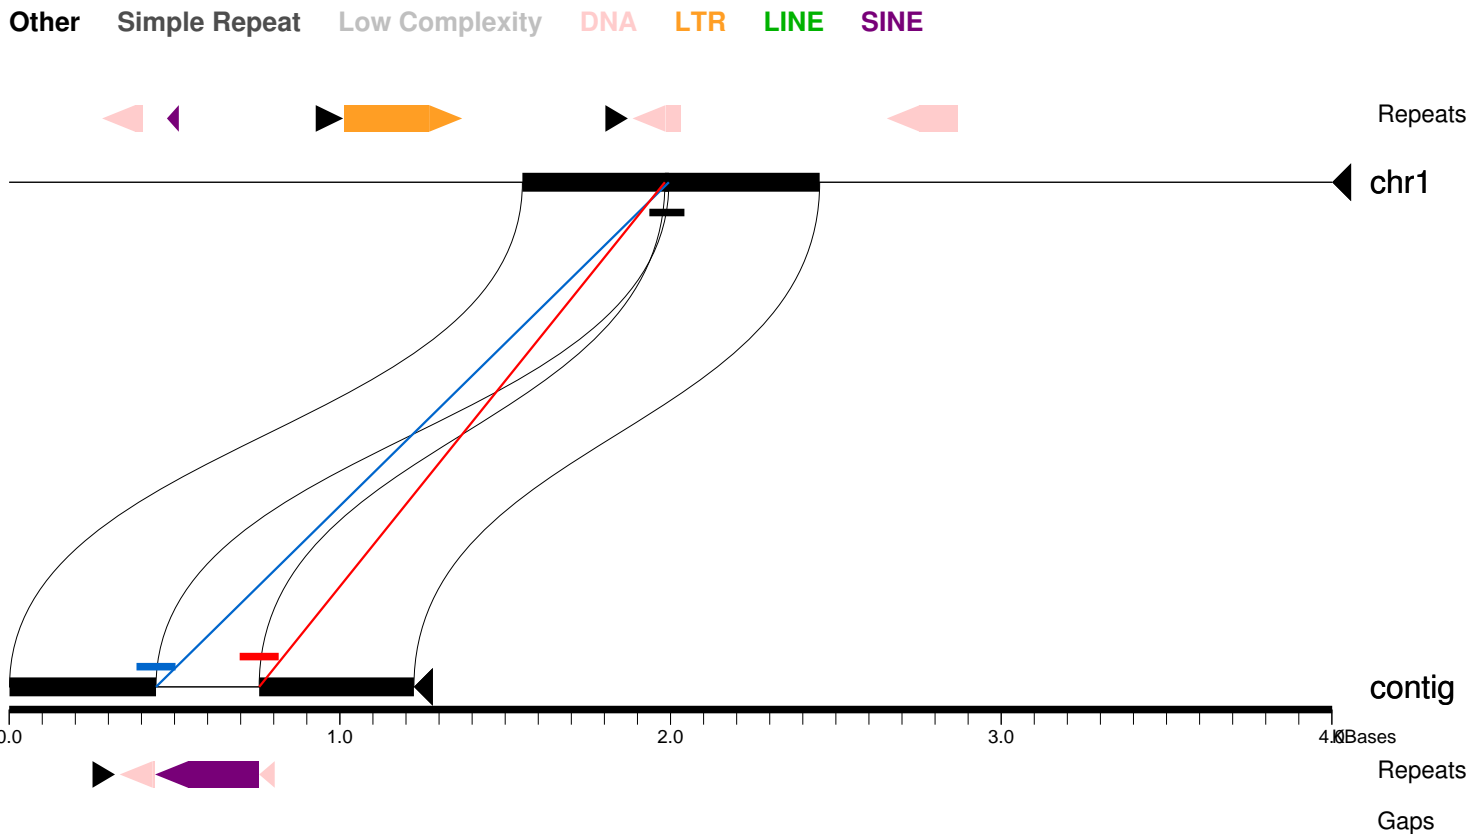











siteID: chr1\_146658201 Scafftig2 + Breakpoint: chr1:146658206

chr1:146658160-146658265

Overlap Length: 14 INS size: 303 Genotyped: Yes

```
left  ACAA-CAAACATTTATTAAGCACCT--ACCACATGTC-----AAGAACTCTGCTAAAGACATACA
chrom ACAA-CAAACATTTATTAAGCACCT--ACCACATGTC-----AAGAACTCTGCTAAAGACATACA
right GCACTCCAGCCTGGGCGACAGAGCGAGACTCCGTCCTCAAAAAAAAAAAAAAAAAAAAAAAACATAACA
      1**11*1*1*1*111111*111*1*111**11*1*1**1111111111**1**1111111***1*****
```

```
left  AAGGGCCGGGCGCGGTGGCTCACGCCTGTAATCCCAGCACTTTGGGAGGCCGAGGCGGGCGG
chrom AAGAT---GACTAAAAGAGTA---CCTGAGCTCCAGTC--TAGGGATTACCACAAG-----
right AAGAT---GACTAAAAGAGTA---CCTGAGCTCCAGTC--TAGGGATTACCACAAG-----
      **22222*2*22222*22*2222****222*****2222*2*****222*2*222*22222
```

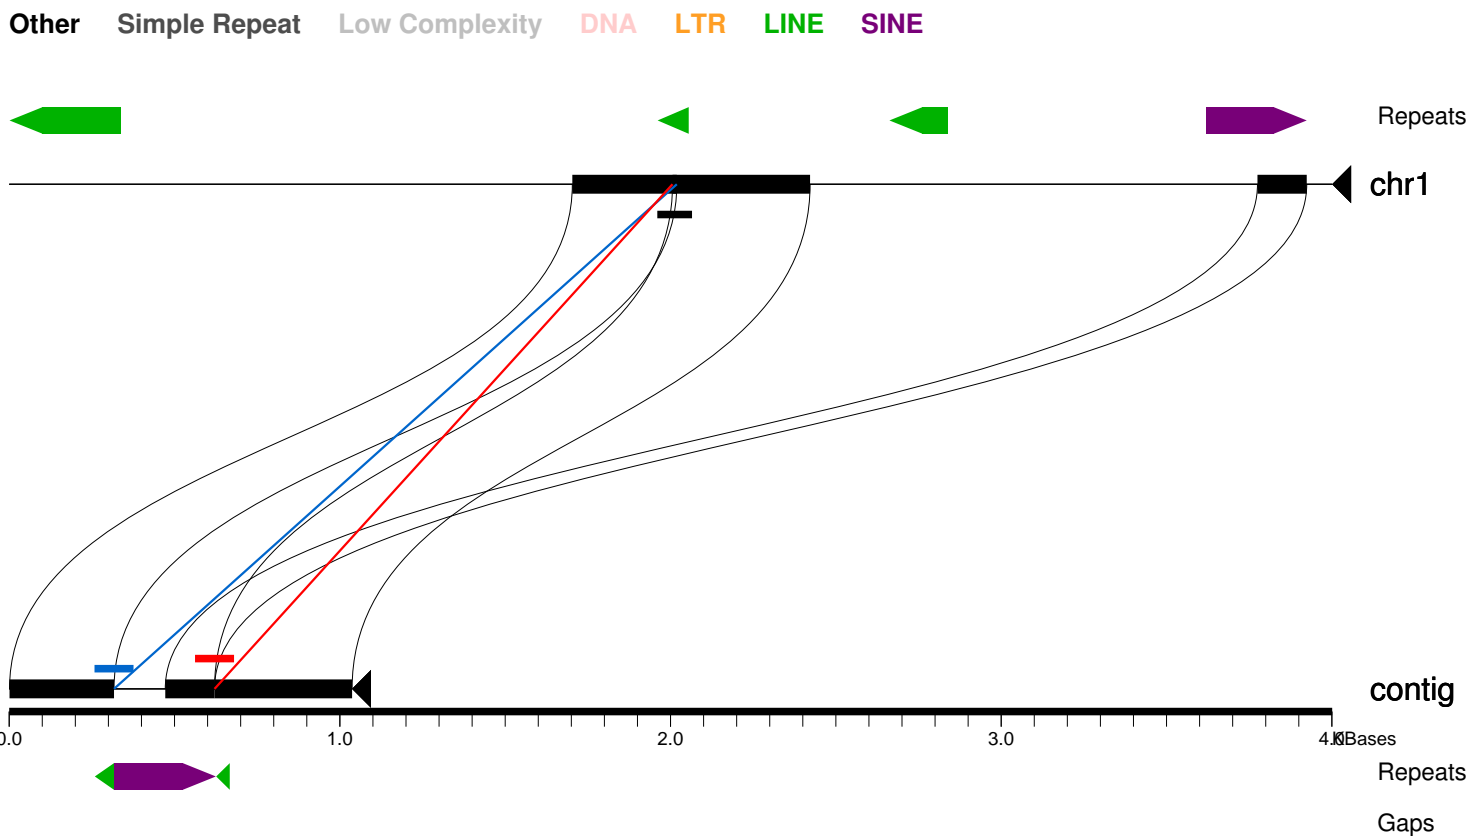



siteID: chr1\_157235765 Scafftig3 + Breakpoint: chr1:157235732

chr1:157235683-157235791

Overlap Length: 11 INS size: 126 Genotyped: Yes

```
left  AACTTGTACATTTTTTAATAATAGCACTTTGTGGTT-----TTTATTTCTTTTT-----GGGACTGTTT
chrom AACTTGTACATTTTTTAATAATAGCACTTTGTGGTT-----TTTATTTCTTTTT-----GGGACTGTTT
right AG-TGGCGCAATCTCGGCTCACTGCAAGCTCCGCTTCCCGGGTTCACGCCATTCTCCTGC GGGACTGTTT
      *11*1*11*1*1*1111*1*11***111*11*1**111111**1*111*1**1*11111*****
```

```
left  TTTTTTTTTTTTTTTTTTTTTTTTTTTTGGAGACGGAGTCTCGCTCTGTGCGCCAGGCCGGACTG
chrom TAAATAGGTTATACTTTTC----TAGAAAAATGATCCACTAAA-GTCTTCAAATA-----TA
right TAAATAGGTTATACTTTTC----TAGAAAAATGATCCACTAAA-GTCTTCAAATA-----TA
      *22*222**2*22***22222*2**2*22**22*2*22222***22*2*22222222*2
```

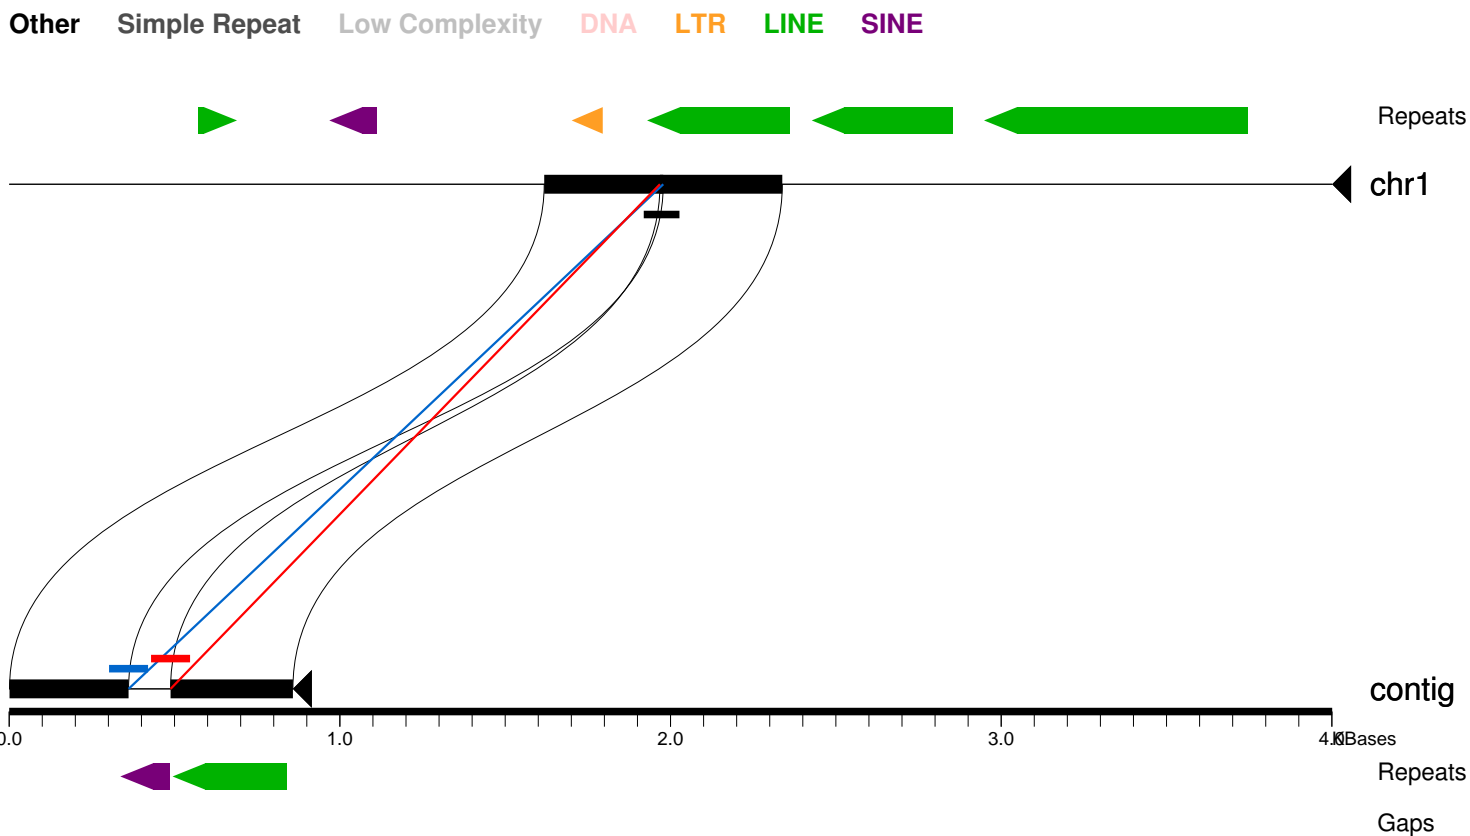

siteID: chr1\_157363510 Scafftig7 + Breakpoint: chr1:157363488

chr1:157363443-157363547

Overlap Length: 15 INS size: 308 Genotyped: Yes

```
left  -----CAATTACAGCATTATAAATATTCTGTGTTTTTCTAG---GAACTTACTA-----CCATGCATGA
chrom -----CAATTACAGCATTATAAATATTCTGTGTTTTTCTAG---GAACTTACTA-----CCATGCATGA
right TCCACCCGCTCGGCCTCCCAAAGTGCTGGGATTA-CAGGCGTGAGCCACCGCGCCCGGCCCATGCATGA
      111111*111111*1**1*111**11*1***1*1**11*11*111**1*111*1111111111******
```

```
left  GTTTTTTTTTTTTTTTTTTTTTTTTTTTTTTTTTTTGAGACGGAGTCTCGCTC-TGTCGCCCAGGCTGGACTGCG
chrom GTTTTTGTACCTGTAGATGATTTCTCATTG-----CTCACTAATGTC-----CTTTTCTTT-
right GTTTTGTACCTGTAGATGATTTCTCATTG-----CTCACTAATGTC-----CTTTTCTTT-
      *****2*222*2*222*22***2*2222*2222222****2**22****2222222***222**222
```

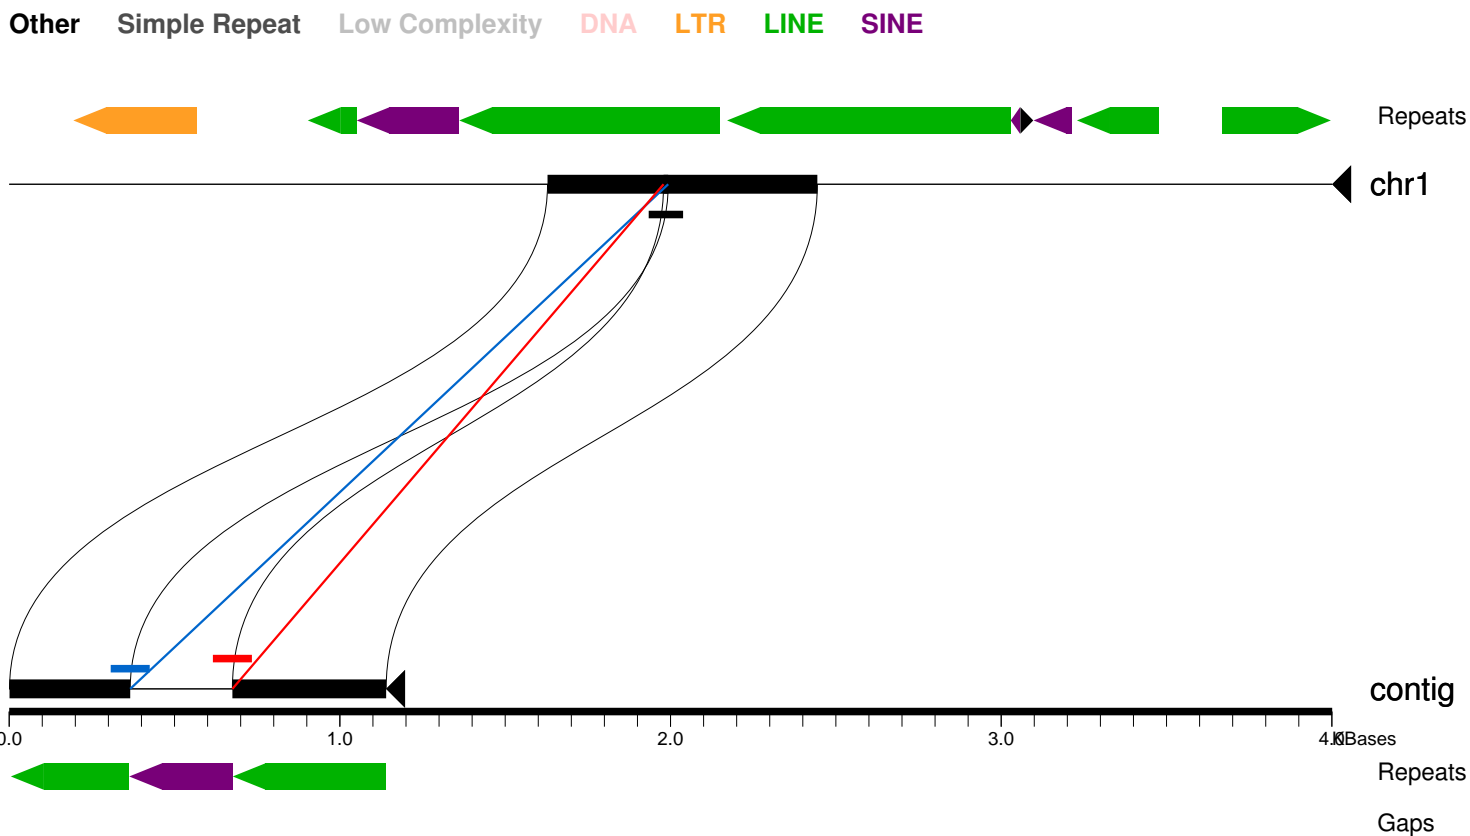

siteID: chr1\_162080076 Scafftig2 + Breakpoint: chr1:162080083

chr1:162080040-162080142

Overlap Length: 17 INS size: 297 Genotyped: Yes

```
left  -TAAGTT---ATATATAGACCACTGTGC-----CTGTC-TGGGCACATGTTCA---CCAGCCAAATA
chrom -TAAGTT---ATATGTAGACCACTGTGC-----CTGTC-TGGGCACATGTTCA---CAGCCAAATA
right ATCCGCCCCGCTCGGCCTCCCAAAGTGCTGGGATTACAGGCGTGAGCCACCGCGCCCGGCAGCCAAATA
      1*11*111111*1121111***11***11111111*1*1*1**1**1111*11*1111*****
```

```
left  ACTTTTFFFFFFFFFFFFFFFFGGAGACGGAGTCTCGCTCTGTCTGCCAGGCTGGAGTGCAGTGG
chrom ACTTTTAAACATGCCCAAGGAAATGA-ACACAGGCTC-----CAGGGTC---TG-AGGAA
right ACTTTTAAACATGCCCAAGGAAATGA-ACACAGGCTC-----CAGGGTC---TG-AGGAA
      *****2222*222222222222***2**22**2***222222222222*****2*2222**2**222
```

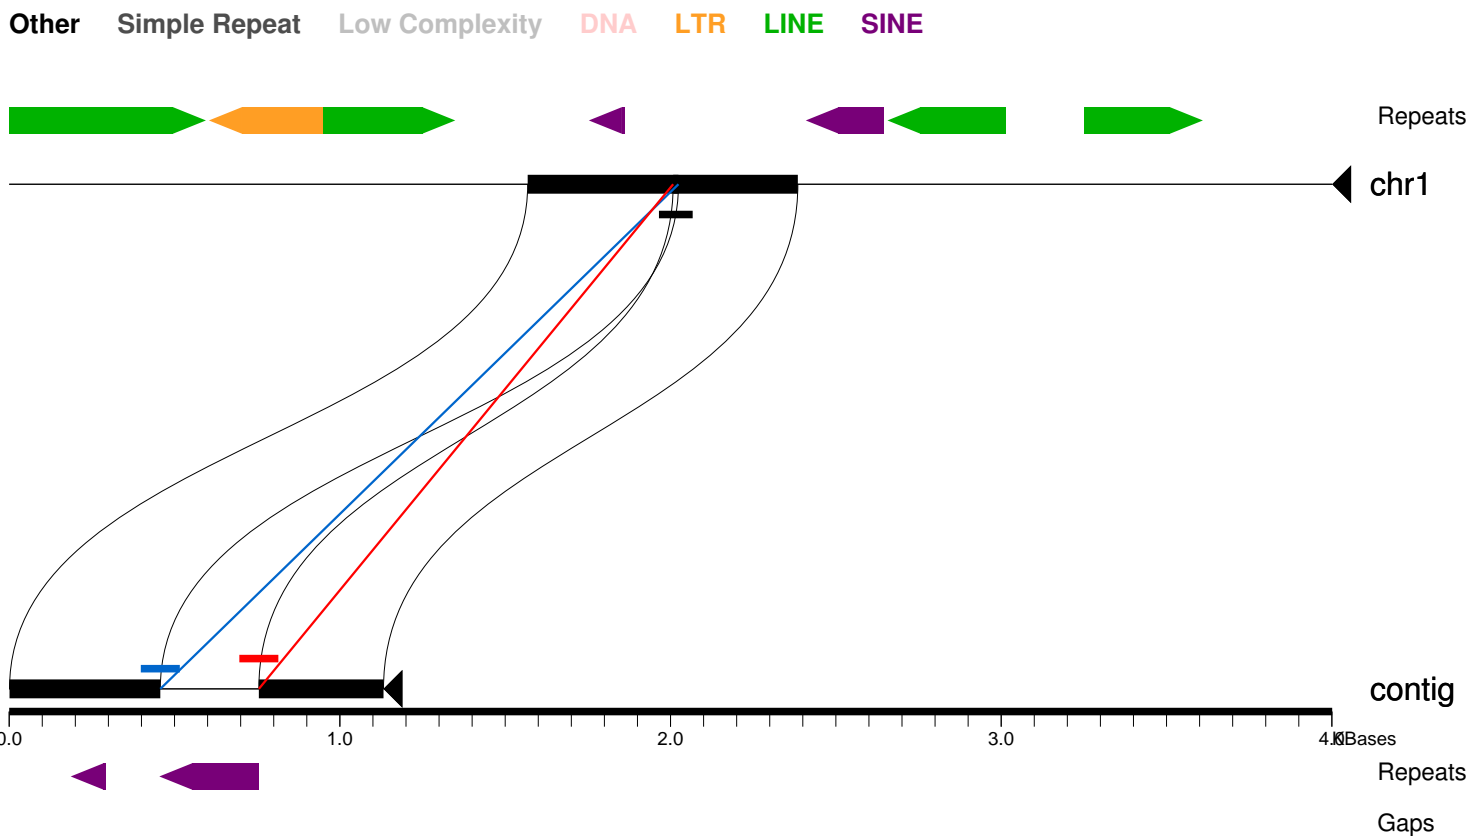





siteID: chr1\_163314427 Scafftig5 - Breakpoint: chr1:163314433

chr1:163314384-163314480

Overlap Length: 11 INS size: 322 Genotyped: Yes

```
left  ATTATGGGTTACTGTGGGAGATGGATTG-----ACGTGGTGCAATACAAACTTA-----
chrom ATTATGGGTTACTGTGGGAGATGGATTG-----ACGTGGTGCAATACAAACTTA-----
right AGCCTGGGCGACAGAGCGAGACTCCGTCTCAAAAAAAAAACAAAATAAAAAAAAAAAAAAAAAAAA
*111****11*1*1*1****11111*111111111111**1111*11*1*1****111*1111111111
```

```
left  -GAAGTGGGTAGGGCCGGGCGCGGTGGCTCACGCCTGTAATCCCAGCACTTTGGGAGGCCGAGGCGGGCG
chrom -GAAGTGGGTAG-----ACAATT----TACCATCT-TTTGTGAAGCAATGTTTTTAA
right AGAAGTGGGTAG-----ACAATT----TACCATCT-TTTGTGAAGCAATGTTTTTAA
1******222222222222222222**222*2222*2***2*22****2**2**222*2222222
```

```
left  G-
chrom AC
right AC
      22
```

Other Simple Repeat Low Complexity DNA LTR LINE SINE

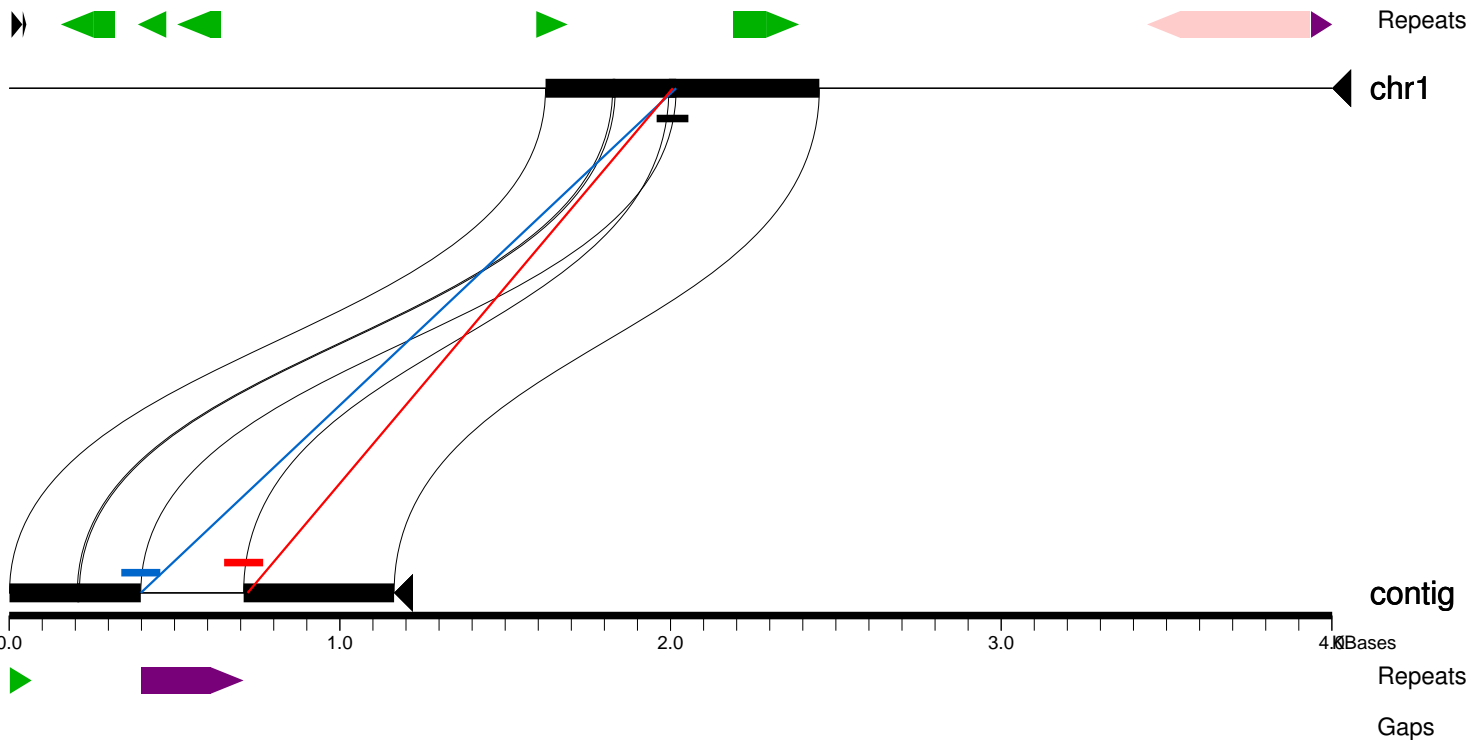

siteID: chr1\_166189399 Scafftig2 + Breakpoint: chr1:166189433

chr1:166189386-166189492

Overlap Length: 13 INS size: 305 Genotyped: Yes

```
left  TAAAATTCCTTCTTGACTTTAGACATTCTGAATATAAATATGCTGTGA-----TGAAGTC
chrom TAAAATTCCTTCTTGACTTTAGACATTCTGAATATAAATATGCTGTGA-----TGAAGTC
right CCACCCGC---CTCGGCCTCCCAAAGTGCTGGGATTACAGGC-GTGAGCCACCGCGCCCGGCC-TGAAGTC
      11*11111*111**1*1*1*111*1*1*111111**1*1*1**1****111111111111111111*****
```

```
left  CTTTTTTTTTTTTTTTTTTTTTTGAGACGGAGTCTCGCTCTGTGCGCCAGCAGGCCGGACTGCAGAC
chrom CTTTTTACAATGTATTTTCCTG----GGGGTC---ATTGGGCCTCCTATAT-CTAGA----TGTT
right CTTTTTACAATGTATTTTCCTG----GGGGTC---ATTGGGCCTCCTATAT-CTAGA----TGTT
      *****2222*2*2*****22**2222**2***2222*22*2*22**222*22*22**22222*22
```

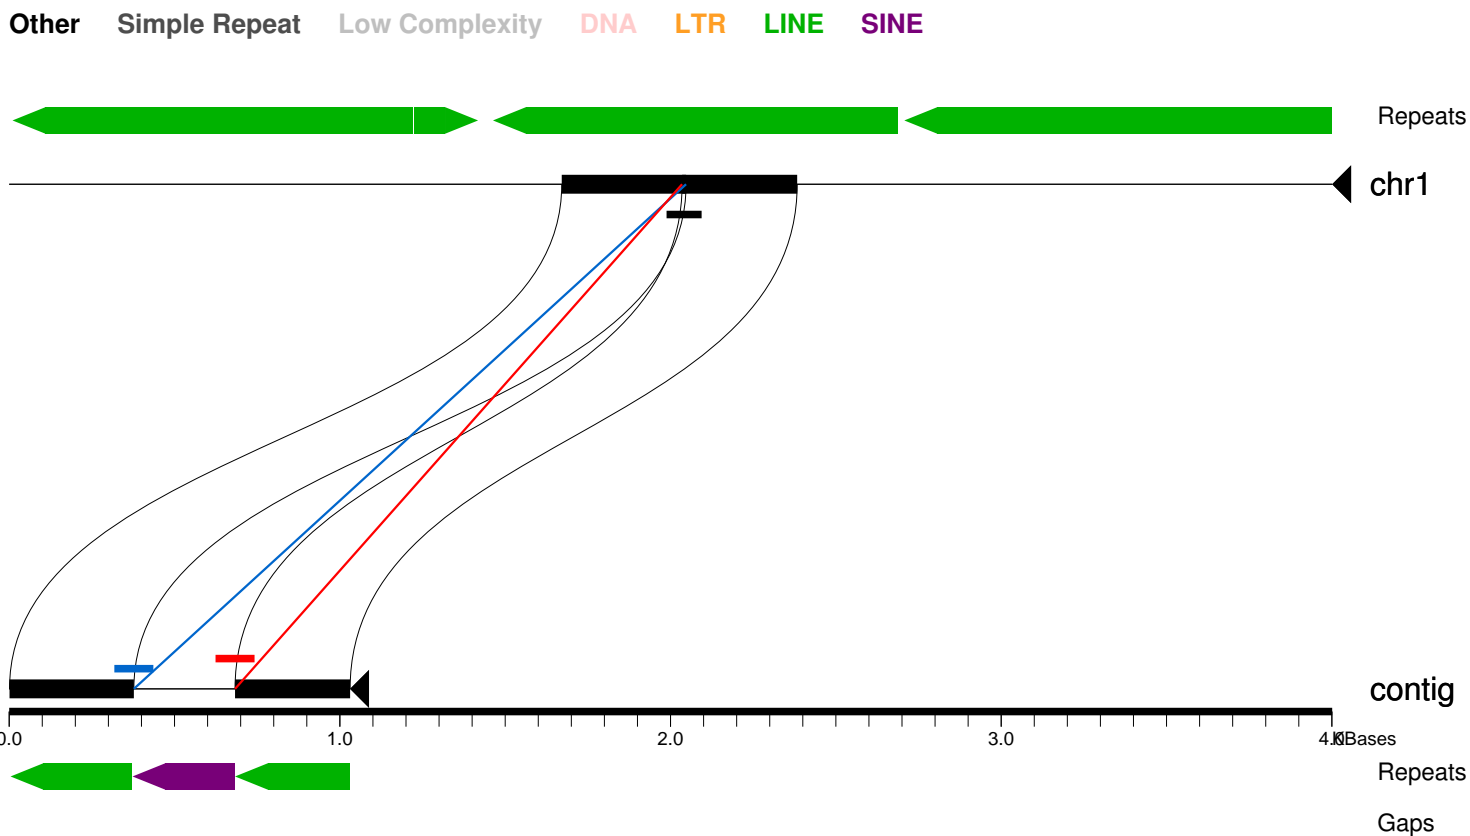



siteID: chr1\_170651532 Scafftig1 - Breakpoint: chr1:170651485

chr1:170651433-170651544

Overlap Length: 3 INS size: 98 Genotyped: Yes

```
left  GTGCTCC-----CATGTTCTCAGTCACCCCTTGATAGTATTATCACACTGCATGGCTTAAAGCCTGC-AG
chrom GTGCTCC-----CATGTTCTCAGTCACCCCTTGATAGTATTATCACACTGCATGGCTTAAAGCCTGC-AG
right GGGCGACAGCGAGACTCCGTCTCAAAAAAAAAAAAAAAAAAAAAAAAAAAAAAAAAAGAAAAAGAATGCCAG
      *1**11*11111111*1111*****111*111111*1*11*11*11*1*1111*1*1111**22***2**
```

```
left  TGAGCCGAGATTGCGCCACTGCACTC-CAGCCTGGGCGA-CAGCGAGACTCCGTCTCAA
chrom TAAG----GTTTTGGTGCCT-CAGTCACATCCTGCTCACTCCTCTAGAGT-----TCCC
right TAAG----GTTTTGGTGCCT-CAGTCACATCCTGCTCACTCCTCTAGAGT-----TCCC
      *2**2222*2**22*222**2**2**2**2**2**2**2**2**22*222*22*2**2*22222**22
```

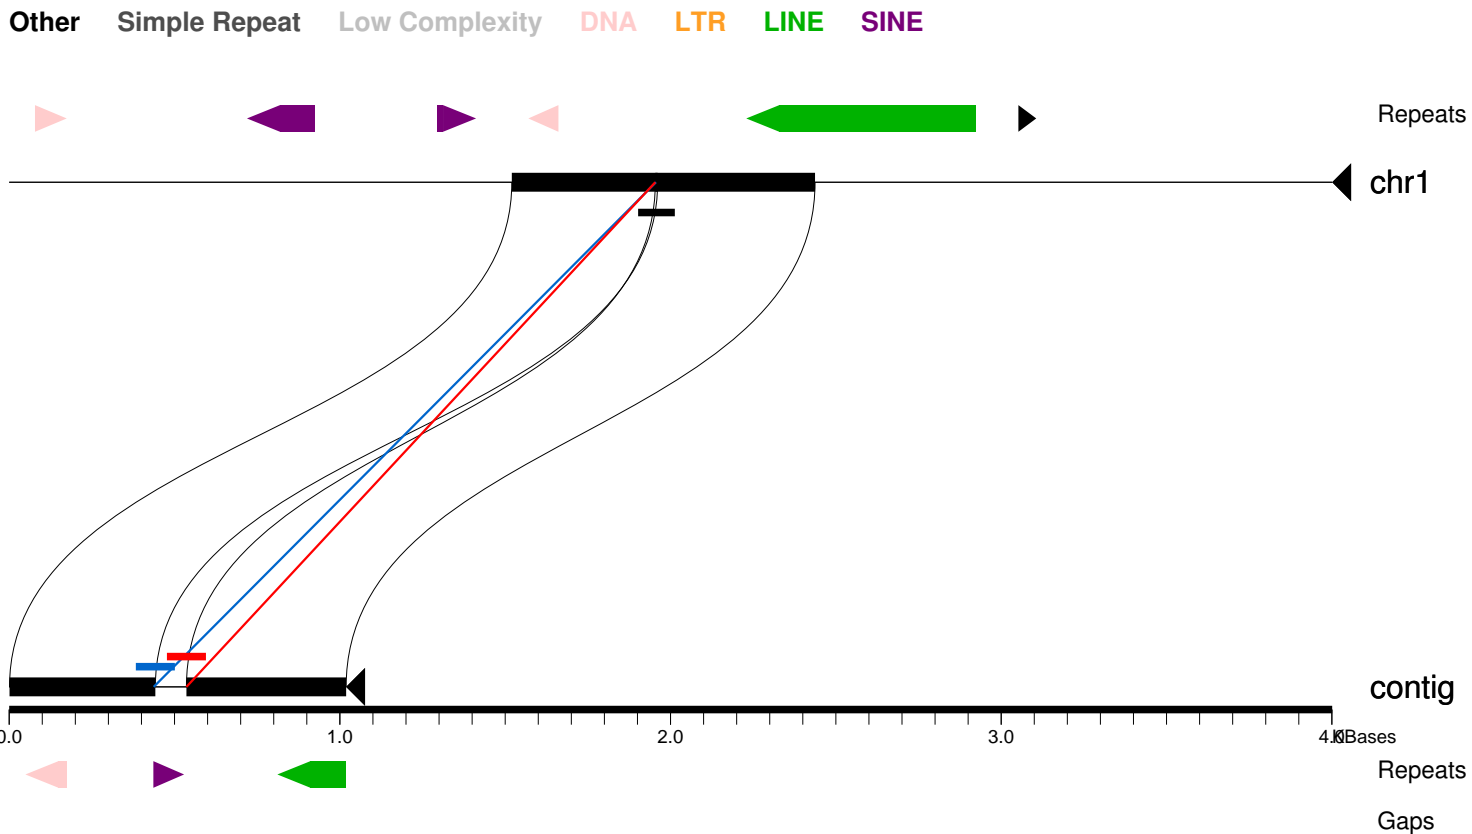

siteID: chr1\_17234111 Scaffitg9 - Breakpoint: chr1:17234101

chr1:17233941-17234277

Overlap Length: 17 INS size: 308 Genotyped: Yes

```
left      C-----AGAAAATTATGTTTTTTCTTTGGTTAACTGCAGACTTTGGTCTGCACAATC
chrom     CCATA-CATCCTATTGGTCAGAAAATTATGTTTTTTCTTTGGTTAACTGCAGACTTTGGTCTGCACAGTC
right    GAATGGCATGAACCTGGGAGGCGGAGGTTGCAGTGAGCTGAGATCGCGCCAC-----TCTGCAC----
1N22N1222NNNNN222NN1*111*111**111*1111*11*1*11*11**11111111*****1N11
```

```
left      TTTTTCTTTCTTTGGTCTGAAAACCACCCACAGTCCCATATGTAGCTTTTTTTGGATAAACCTAGAAATGG
chrom     TTTTTCTTTCTTTGGTCTGAAAACCACCCAGTAGTCCCATATGTAGCTTTTTTTGGATAAACCTAGAAATGG
right    ----TCCAGCCTGGGCGACAGAGCA---AG-ACTCCG-----TCTCAAAAAAAAAAAAAAAAAAAA
1111**111*1***1*111*1*1**11122N*1***11111111111111*1*11*1***111*1***1N1
```

```
left      ACCCTTCTGGTCTTACAGCTTGAAACTTAATATTTGT--GGCCGGGTGCGGT-----GGC-----T
chrom     ACCCTGCTGGTCTTAAAGCTTGAAACTTAATATTTGTTCGTCTGAGTTCCCTTCCTCAGGAAACAACCTT
right    A-----AAAGAAA*GAAACTTAGTATTTGTTTTATCTGAGTTCCCTTCCTCAGGAAATGACCTT
*1111N111111111*2**111******1*****2N12*2*2**2*22*22222**222NN2222*
```

```
left      CAGCCTGT----AATCCAGCA-----CTTTGGGAGGCCGAGGCGGTGGATCACGAGGTC
chrom     CAGGCCTCTCAAAAAAGCCATCAAAGAACTGAAATTCATCCAGACAATGAGATGCTGGGACCCCTCATTC
right    CAGGCCTGTCAAAAAAGCTATCAAAGTACTGAAATTCATCCAGAAAATGAGATGCTGGGACCCCTCATTC
**2***N*2222**22*1*2**222N22222222*2*222**N222***22*222***2*2*2222**
```

```
left      AGGA-GATCGAGACCAT---CCTGGCTAACACGGTGAAGC---CCCGTCTCTACTAAA
chrom     ATCATGATTGCTTCCCTTGCTCCTCCCTAGTTCCCTGTTTTCTTACACATTTGTTACATTT
right    ATCATGATTGCTTCCCTTGCTCCTCCCTAGTTCCCTGTTTTCTTAC-----T
*22*2***2*222**2*222***22***222*2222222*222*N1N1NNN111NNN2
```

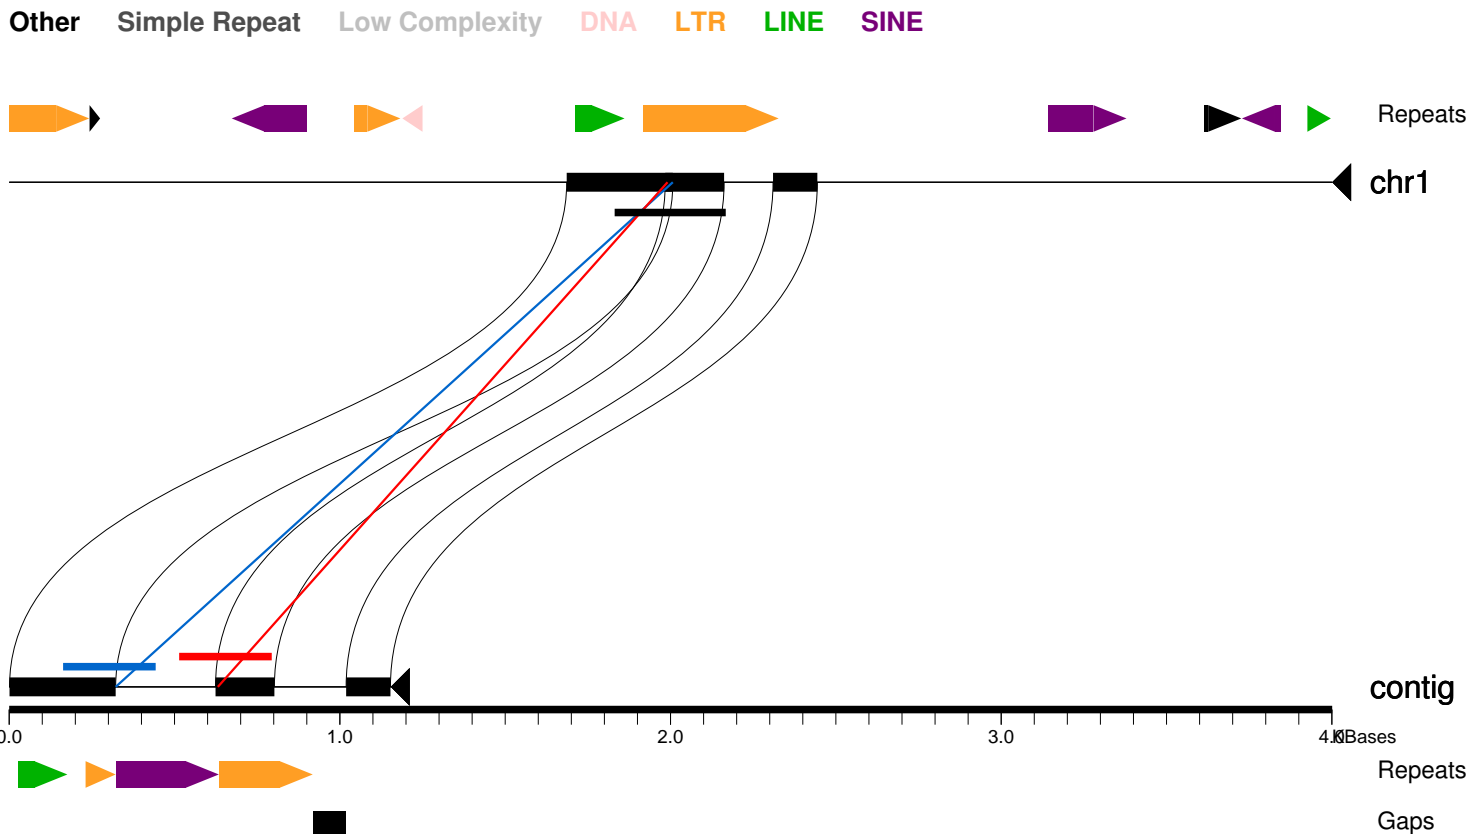





siteID: chr1\_180857556 Scafftig1 - Breakpoint: chr1:180857550  
 chr1:180857390-180857724  
 Overlap Length: 15 INS size: 306 Genotyped: Yes

```

left  -----TAACCCCTATCTGTGGCATTGTTTTAAAAATGTGGGATACAAATCTGG---
chrom A-----AAATAATTAAAGAAAATAACCCCTATCTGTGGCATTGTTTTAAAAATGTGGGATACAAATCTGG---
right AGTCCCAGCTACTTTGGGAGGCTGAGGCA---GGAGAATGGCGTGAACCCG--GGAGGCAGAGCTTCAG
      21111112NN22N22NN22NNN*1*11*11111*11*1**1*11*1**111*11***11*1**1*111

left  TAAGCAGATTTTCAGGTCATTATTGTTTTCTTTTAATGGTTTACAT-GAAATTTTCC-TCTCAAAAAACAA
chrom TAAGCAGATTTTCAGGTCATTATTGTTTTCTTTTAATGGTTTACAT-GAAATTTTCC-TCTCAAAAAACAA
right TGAGCCGAGATCCCAGCCACT---GCACTCCAGCC-TGGGCGACAGAGCGAGACTCCGTCTCAAAAAAAAAA
      *1**1**11**11*1**1*111*111**111111**111**11*11*111**1*****1**

left  GTACCTCTTACTGTATAACATTTGAGTTTTTAAAAATTGAGATAGC-----AGGCCGGGCGC
chrom GTACCTCTTACTGTATAACATTTGAGTTTTTAAAAATTGAGATAGCTTCTGAGAGAAAAAAGAAAGTTGA
right TAAA-----ATAAAAATAAAA-----TAAAAATTGAGATAGCTTCTGAGAGAAAAAAGAAAGTTGA
      11*111111111111**111*11111**11111*11111*11111*222222222222*2*222*22*2

left  G---GTGGCTCACGCCGTGTA---ATCCAGCACTTT-----GGGAGGCCGAGGC-----
chrom ATTTGTAGCTCTCTCAACTACAAAATCACCACACTTTTCTCAAAATCTAATAGGAATTCAGTGTATTACA
right ATTTGTAGCTCTCTCAACTACAAAATCACCACACTTTTCTCAAAATCTAATAGGAATTCAGTGTATTACA
      2222**2***2*2*222**2222***2*22*****222222222222**2*22*2*2*2*222222

left  GGGCGGATCACGAGGTCAGGAGATCGAGACCATCCGGCTAAAACGGTGAACCCCGTCTCTACTAAA-
chrom GATACGGTCTCTAG-TGACCAGGTGAAGACAATGAAGCTTT---GGTAGAACTCTTGCAAAAGTTAGG
right GATACGGTCTCTAG-TGACCAGGTGAA-----
      *2222*2*2*2*2*2*22*2*22*111N11NNN111NN22111NN111NN1NN1NNN1N1N1N
  
```

Other    Simple Repeat    Low Complexity    DNA    LTR    LINE    SINE

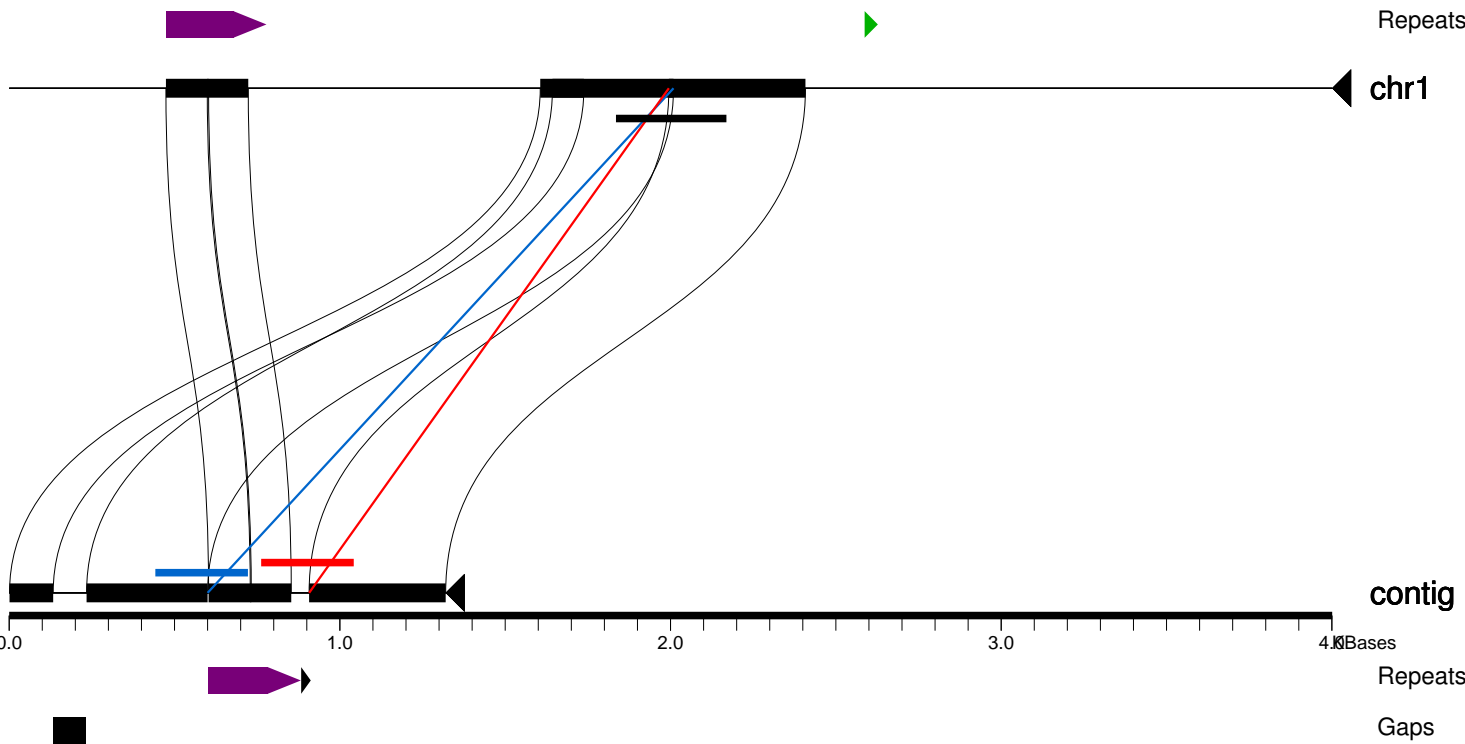



siteID: chr1\_181588354 Scafftig1 - Breakpoint: chr1:181588347

chr1:181588301-181588406

Overlap Length: 6 INS size: 318 Genotyped: Yes

```
left  -----GGTGATACAGTACAAGGGGACGGGGTC---GGTTTTGGTAGGAGGGCCT----GATGGTTTTTTT
chrom -----GGTGATACAGTACAAGGGGACGGGGTC---GGTTTTGGTAGGAGGGCCT----GATGGTGTACT
right  CCACCCGCCTCGGCCTCCCAAAGTGCTGGGATTACAGGCGTGAGCCACCGCGCCCGGCCGATGGTGTACT
      111111*111111*1111***1*1*11***1*1111**11*11*11111*1***11111*****2*22*

left  TTTTTTTTTTTTTTTTTTTTTTTTTTTTTTTGAGACGGAGTCTCGCTCTGTCGCCCAGGCCGGACTGC
chrom TTTATATGGGGTAGTT-----AGGAAAGGCCTCACAGAGAAGTTGACTTTTGAA---
right TTTATATGGGGTAGTT-----AGGAAAGGCCTCACAGAGAAGTTGACTTTTGAA---
      ***2*2*2222*22**2222222222**22222*2***2*222*22*222*22222**2222
```

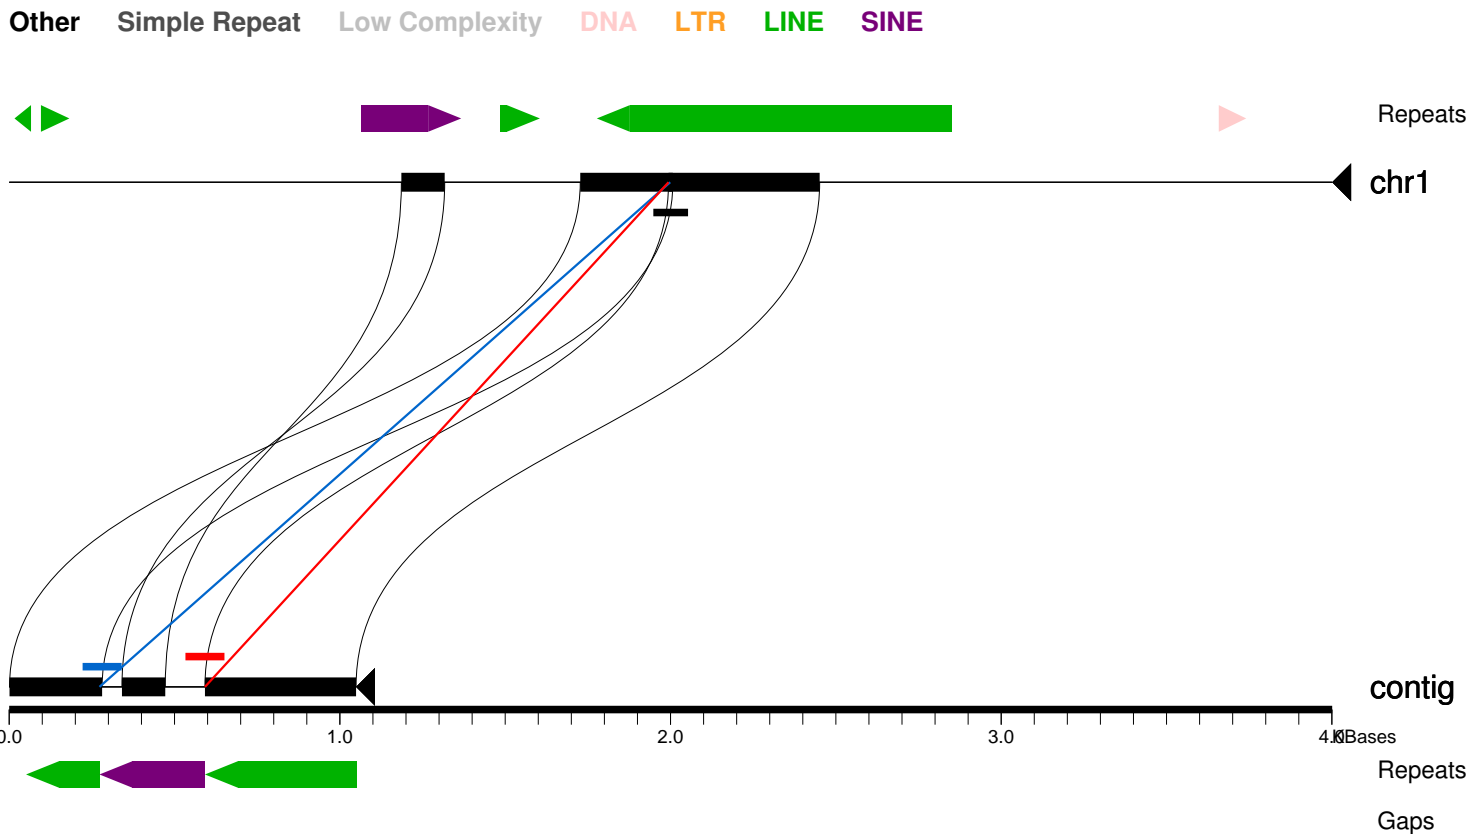













siteID: chr1\_191580767 Scaffitig1 + Breakpoint: chr1:191580769

chr1:191580722-191580828

Overlap Length: 13 INS size: 312 Genotyped: Yes

```
left  TTATGTAAAAATTTACTGGAATCATTTCT-----AATATTCCTCTAGAATAAAATTT----TAAAAATAAAAG
chrom TTATGTAAAAATTTACTGGAATCATTTCT-----AATATTCCTCTAGAATAAAATTT----TAAAAATAAAAG
right CCTGGGCGACAGAGCGAGACTCCGTCTCAAAAAAAAAAAAAAAAAATAAAAAATAAAAAATAAAAAATAAAAAATAAAATTTAAAAATAAAAG
      1111*111*11111*11**1**11***11111111**1*111*11*1*****1*1111******
```

```
left  TAGGCCGGGCGCGGTGGCTCACGCCGTGAATCCCAGCACTTTGGGAGGCCGAGGCGGGCGG
chrom TAGGCCGGGCGCGGTGGCTCACGCCGTGAATCCCAGCACTTTGGGAGGCCGAGGCGGGCGG
right TAGGCCGGGCGCGGTGGCTCACGCCGTGAATCCCAGCACTTTGGGAGGCCGAGGCGGGCGG
      **2222222222222222***2*222222***22*22*2**22*222222222222**
```

Other Simple Repeat Low Complexity DNA LTR LINE SINE

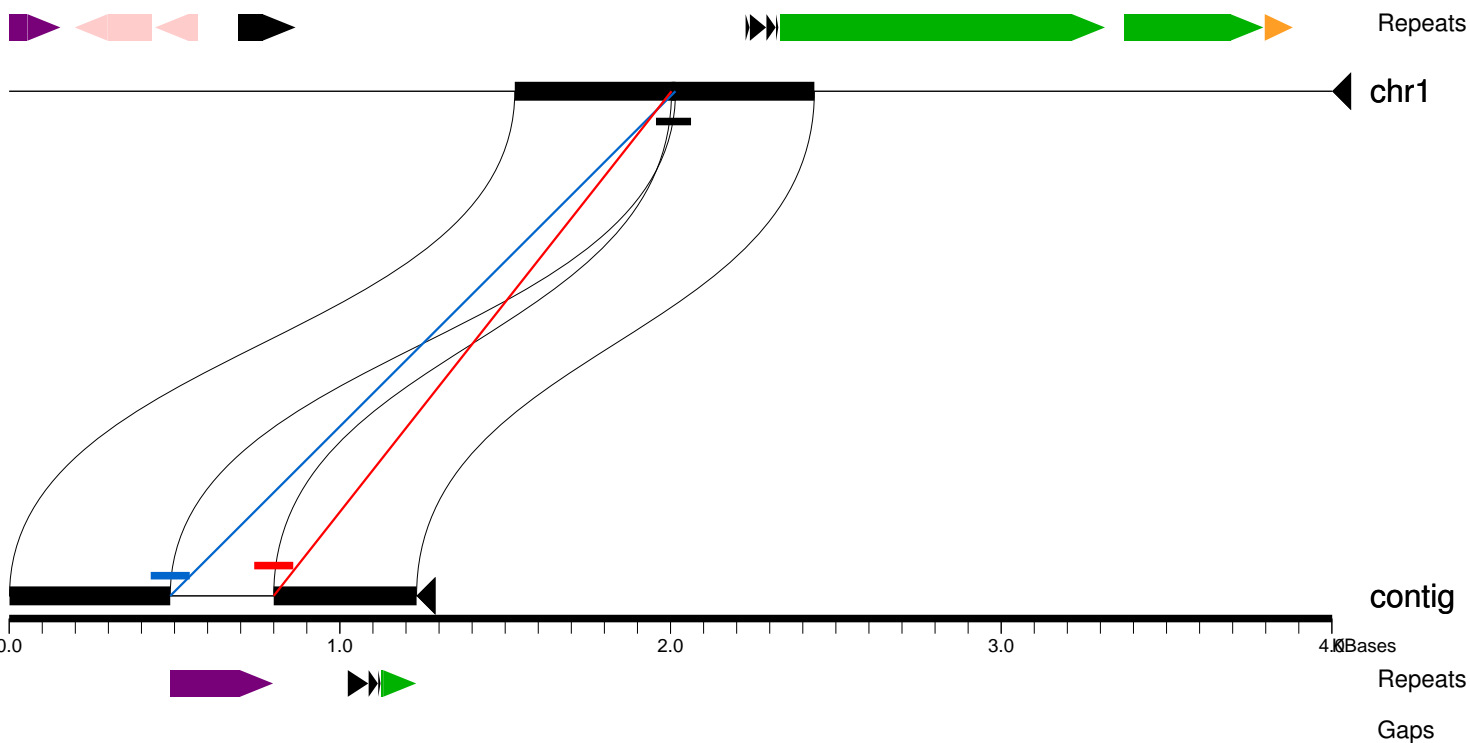



siteID: chr1\_191817418 Scafftig2 - Breakpoint: chr1:191817426

chr1:191817378-191817485

Overlap Length: 12 INS size: 307 Genotyped: Yes

```
left  -----ACAGATAAAAAACCTATATATGTACATACATACACACACATACATATATATAAAAATAT
chrom -----ACAGATAAAAAACCTATATATGTACATACATACACACACATACATATATATATAAAAATAT
right  TCCAGCCTGGGCGACAGAGCGAGAC-TCCGTCTCAAAAAAAAAAAAAAAAAAAAAAAAAATAAAAAA-A-TAAAAATAT
11111111111111111111*****111*1**1*111*1*11*1*1*1*1*1*1*1*1*1*1*1*1*1*1*1*1*1*1*****
```

```
left  CACGGCCGGGCGCGGTGGCTCACGCCTGTAATCCCAGCACTTTGGGAGGCCGAGGCGGGCGG
chrom CACATTCA-----CATCACTCC--AAATATAAATTATAAGAGCTACACATATAAGAAC
right CACATTCA-----CATCACTCC--AAATATAAATTATAAGAGCTACACATATAAGAAC
** *222*222222222222222*****2**222***222*2222*22*2*222*22*22222*222
```

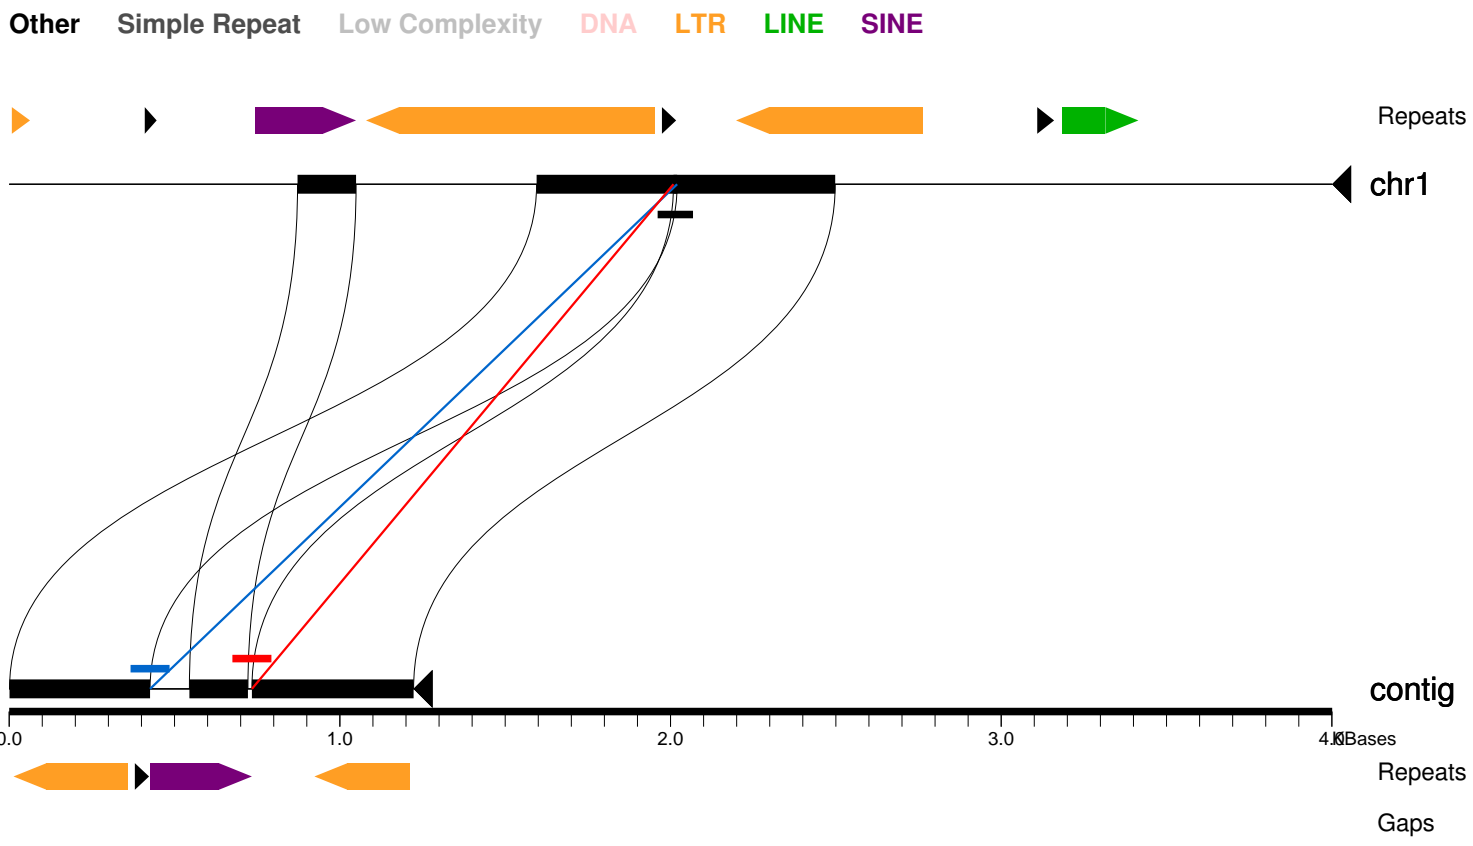

siteID: chr1\_194595911 Scafftig1 - Breakpoint: chr1:194595948

chr1:194595901-194595995

Overlap Length: 13 INS size: 132 Genotyped: Yes

```
left  TGCAAT-----ACT--AGTTCTG-----ACAAAAC-AGACTTC-----ACACCAACAAAGATTA
chrom TGCAAT-----ACT--AGTTCTG-----ACAAAAC-AGACTTC-----ACACCAACAAAGATTA
right CGAGATCCCGCCACTGCACTCCAGCCTGGGCGGACAGAGCGAGACTCCGTCTCAAAAAAAAAAAAAAAAAAAAA
1*11**111111***11*1*1*1*11111111***1*1*1*****1*1111111*1*11**1***1*11*
```

```
left  TAAAAGACAAAGAACTACTTGGGAGGCTGAGGCAGGAGAATGGCGTGAACCCGGGAGGCGGGGCTTGCAG
chrom TAAAAGACAAAGAA-----GGGCATTA-----AATAATGG--TAAA-----GGTTTCAG----TTCAA
right AAAAAGACAAAGAA-----GGGCATTA-----AATAATGG--TAAA-----GGTTTCAG----TTCAA
1********22222222*2*22*2*222222*2*****22*2**2222**222*2*2222*2**2
```

```
left  TGA
chrom C-A
right C-A
22*
```

Other Simple Repeat Low Complexity DNA LTR LINE SINE

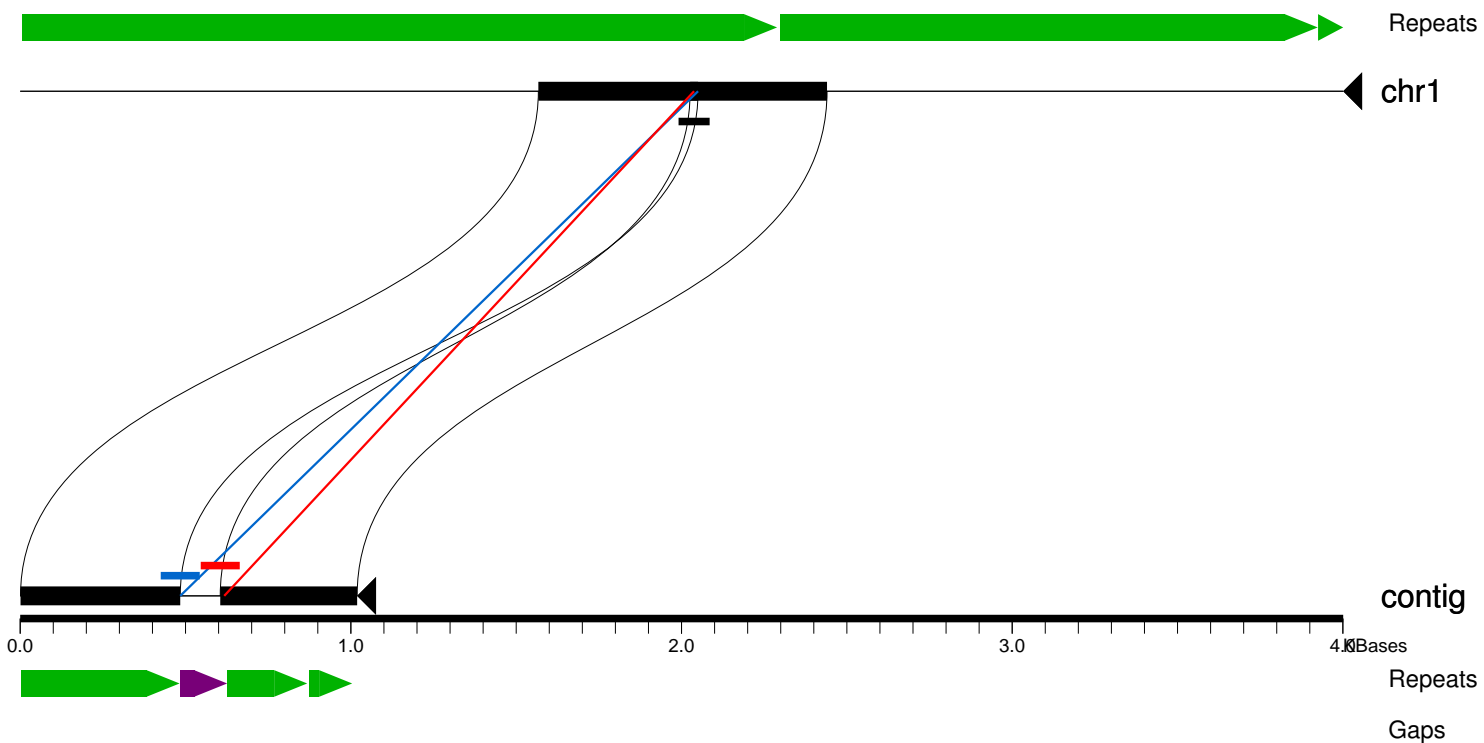

siteID: chr1\_194675136 Scafftig3 - Breakpoint: chr1:194675126

chr1:194675081-194675185

Overlap Length: 15 INS size: 315 Genotyped: Yes

```
left TAATCCACAGA---AGTCT-----AGAGAATATATACTTTCTGAATGTTGGTTAAAAATTGAGT
chrom TAATCCACAGA---AGTCT-----AGAGAATATATACTTTCTGAATGTTGGTTAAAAATTGAGT
right GGG-CGACAGAGCGAGACTCCGTCTCAAAAAAAAAAAAAAAAAAAAAAAAAAAAAAAAAAAAAAAATAAAATTGAGT
      11111*1*****111**1**1111111111111*1*1**1*1*1*1111111**11111111******
```

```
left ATATCGGCCGGGCGCGGTGGCTCACGCCGTGTAATCCCAGCACTTTGGGAGGCCGAGGCGGGCGG
chrom ATATCATCAT----CAGTAAATAAAA---TGTT----CATCTGAATGTCATTTTTTTTCTTT---
right ATATCATCAT----CAGTAAATAAAA---TGTT----CATCTGAATGTCATTTTTTTTCTTT---
      ***22*222222*2**222*2*2222***22222**2*2222**22*22222222*222222
```

Other Simple Repeat Low Complexity DNA LTR LINE SINE

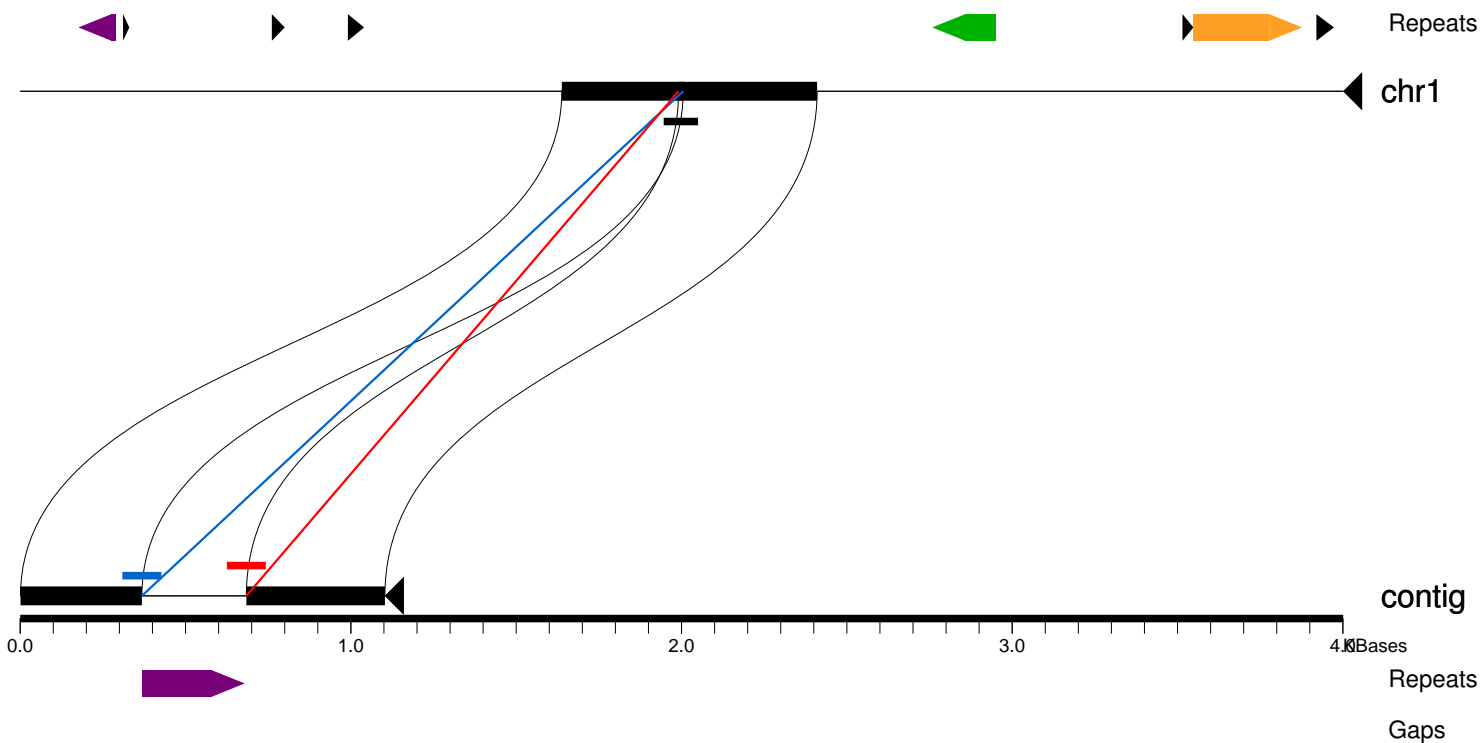

siteID: chr1\_195530219 Scafftig3 + Breakpoint: chr1:195530245

chr1:195530201-195530304

Overlap Length: 16 INS size: 139 Genotyped: Yes

```
left  AAGAAAATG-----TGG----CACATATACACCATGG--AATACTATGCAGCCATAAAAAATGATG
chrom AAGAAAATG-----TGG----CACATATACACCATGG--AATACTATGCAGCCATAAAAAATGATG
right GCGCCACTGCACTCCAGCCTGGGCGACAGCAAGACTCCGTCTCAAAAAAAAAAAAAAAAAAAAAAATAAAAAATGATG
      11*11*1**11111111111***1111**111*1**1**1*111**1*11*111*111*1*****
```

```
left  AGTTCGTAGTCCCAGCTTCTCGGGAGGCTGAGGCAGGAGAATGGCGTGAACCCAGGGGGCGG
chrom AGTTCAT--GTCCT---TTGTAGGGA----CATGGATGAAATTGGAA--ATCATCATTCT----
right AGTTCAT--GTCCT---TTGTAGGGA----CATGGATGAAATTGGAA--ATCATCATTCT----
      ****2222****2222**2*2****22222*2*2*2**2*2**2222*2*22**22222222
```

Other Simple Repeat Low Complexity DNA LTR LINE SINE

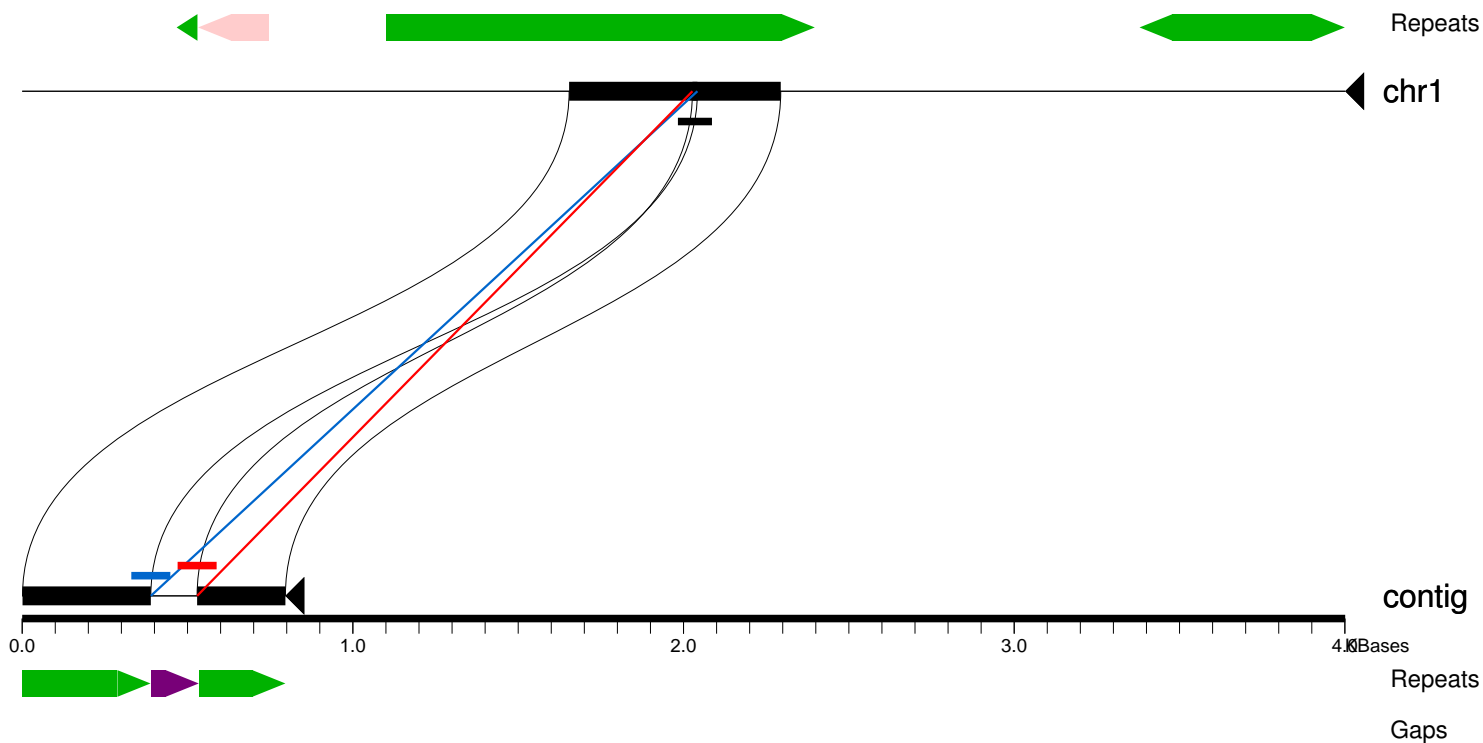

siteID: chr1\_196779233 Scafftig7 - Breakpoint: chr1:196779192

chr1:196779144-196779248

Overlap Length: 12 INS size: 118 Genotyped: Yes

```
left  CCAGATGCATCACCTTTAAGAAGTGTAACTCACCAGGAGGTC-----TGCGGCTTCA
chrom CCAGATGCATCACCTTTAAGAAGTGTAACTCACCAGGAGGTC-----CGCGGCTTCA
right C-AGTGGCGGGATCTCGGCTCACTGCAAGCTCCGCTCCCGGGTTCACGCCATTCTCCTGCGTGGCTTCA
      *1**11**111*1**111111*****1**1111*1**1*11*****11111111111111112*1*****
```

```
left  TTCTTTTTTTTTTTTTTTTTTTTTTTTTTTGAGACGGAGT-CTCGCTCTGTCGCCAGGCTGGAGTGCAG
chrom TTCTTGAA-----GTCAGTGAGACCAAGAACCCTAATTC---CAGACAC-ACTACCA
right TTCTTGAA-----GTCAGTGAGACCAAGAACCCTAATTC---CAGACAC-ACTACCA
      ****2222222222222222*222*****22**22*2*2*1222**222***2*222*2*2*22
```

Other Simple Repeat Low Complexity DNA LTR LINE SINE

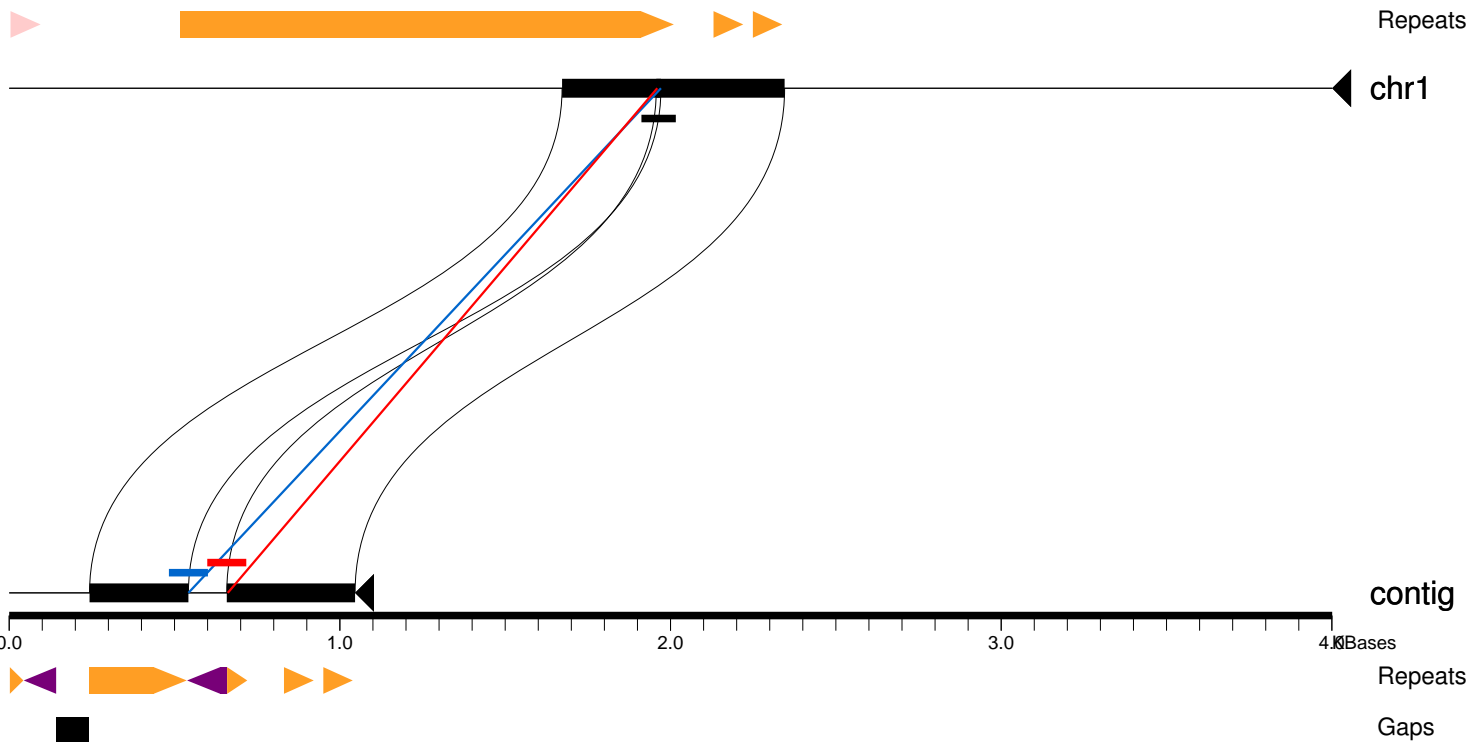









siteID: chr1\_204238458 Scaffitig6 - Breakpoint: chr1:204238456

chr1:204238415-204238515

Overlap Length: 19 INS size: 300 Genotyped: Yes

```
left  C-----AAAGCCTGG-CCCCATGGTGGA-----GTAT-----ATCAACCCGGCTCTCAGAAACCTCAT
chrom C-----AAAGCCTGG-CCCCATGGTGGA-----GTAT-----ATCAACCCGGCTCTCAGAAACCTCAT
right CTGCGCTCCAGCCTGGGCGACAGAGCGAAACTCCGTCTCAAAAAAAAAAAAAAAAAAAAAAAAAAAGAAACCTCAT
      *111111111*****1*11*11*1*1*11111*1*111111*11*1111111111*****

left  CTATTGTCGGCCGGGCGCGGTGGCTCACGC-CTGTAATCCCAGCACTTTGGGAGGCCGAGACGGGCGG
chrom CTATTGTCCTTCC-----TACCTCACCTTCTCTAAAACCT--CAATACGGCACTCCAA-----
right CTATTGTCCTTCC-----TACCTCACCTTCTCTAAAACCT--CAATACGGCACTCCAA-----
      *****22*22222222*22*****222*2*2*22*222*2*22*2*22*2*22222222
```

Other Simple Repeat Low Complexity DNA LTR LINE SINE

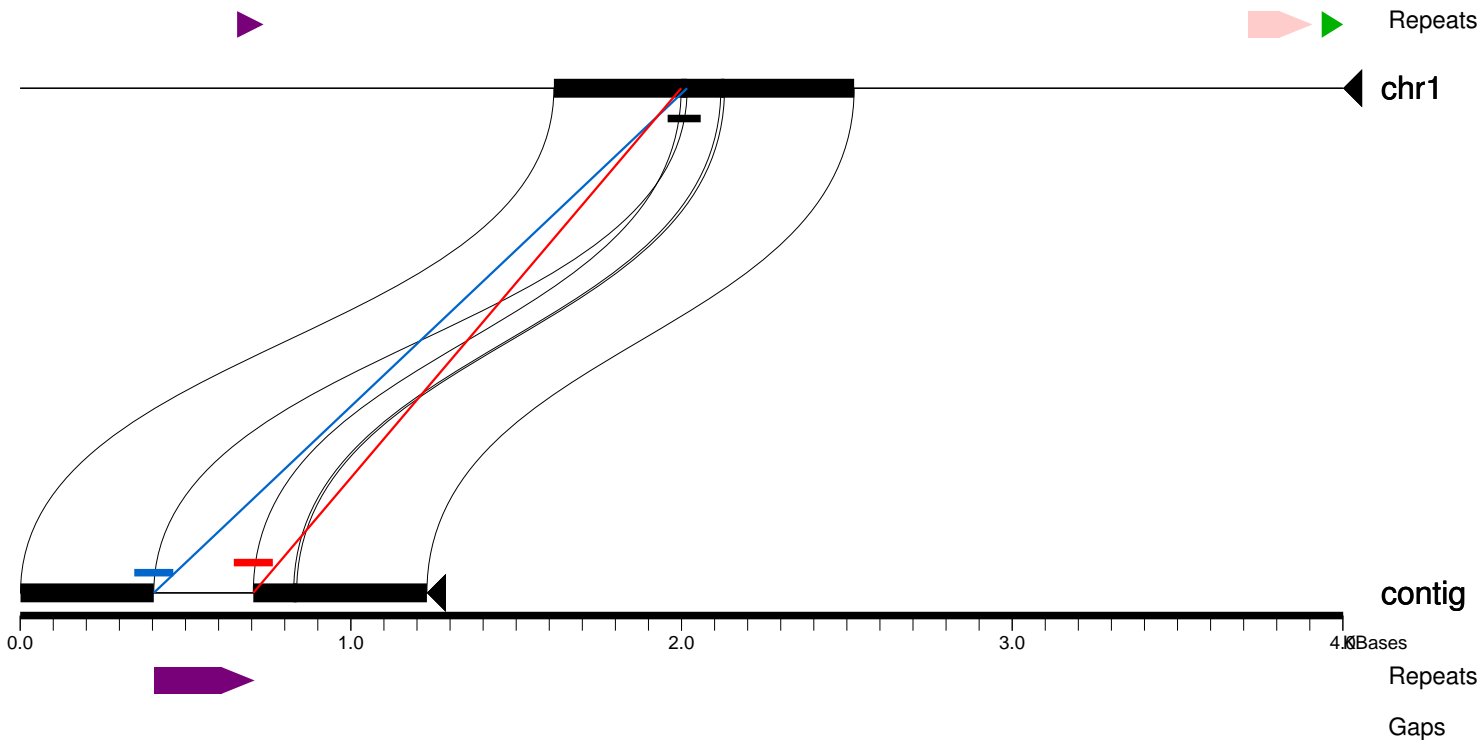

siteID: chr1\_204345042 Scafftig2 + Breakpoint: chr1:204345041

chr1:204344987-204345100

Overlap Length: 6 INS size: 419 Genotyped: No

```
left  CCTGTTCCCTCAGCCCC---ACTGGTGCCTTTATTTCCCAAGCCTCTACTTCCAAG--GCTTCNNNNN
chrom CCTGTTCCCTCAGCCCC---ACTGGTGCCTTTATTTCCCAAGCCTCTACTTCCAAG--GCTTCNNNNN
right CGCCCGCCTCGGCCTCCCAAAGTGCTGGGATTACAGGCGTGAGCCACCGCGCCCGGCCCGCTTCTTTCAC
      *11111***1***1**111*1**1**111***1111*111***1*11*11**11111*****22222
```

```
left  NNNNNNNNNNNNNNNNNNNNNNNNNNNNNNNNNNNNNNNNNNNNNNNNNNNNNNNNNNNNNNNNNNNNN
chrom TCTTGTCTCTCCTCCAGAATCAGCTCAAATGCTTCTCCTCTGGGAAGC-----
right TCTTGTCTCTCCTCCAGAATCAGCTCAAATGCTTCTCCTCTGGGAAGC-----
      22222222222222222222222222222222222222222222222222222222222222222222
```

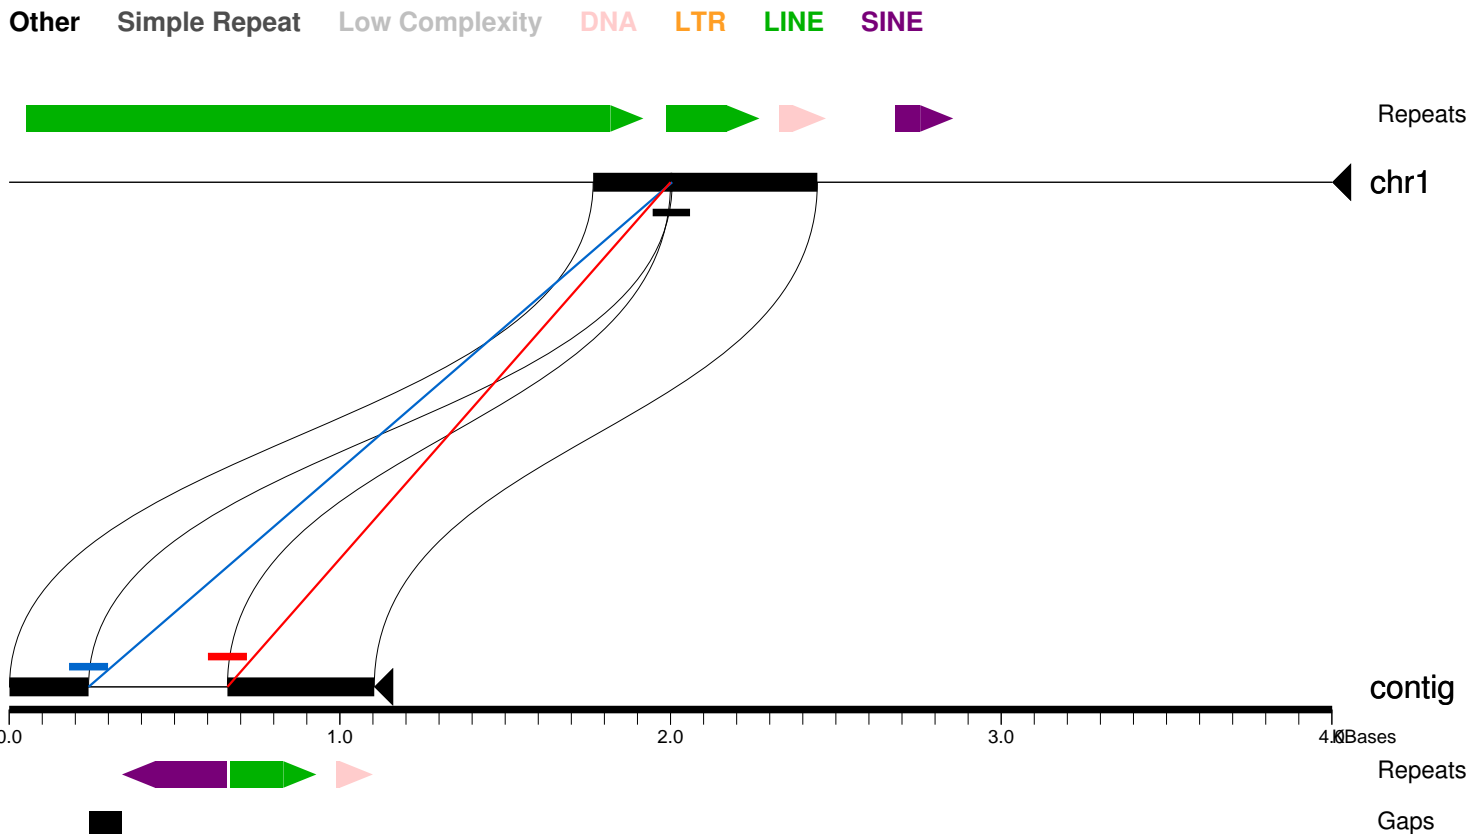

siteID: chr1\_207624027 Scafftig1 + Breakpoint: chr1:207624030

chr1:207623870-207624205

Overlap Length: 16 INS size: 323 Genotyped: Yes

```
left  -----A-----GGGCAGACAAGAATAAGCATGAAAA-GAATCATGAATCTAACTGT-AA
chrom  -----ATTTGGGAAATTTATGAGGGCAGACAAGAATAAGCATGAAAA-GAATCATGAATCTAACTGT-AA
right  CAGCTACTTTGGGAGGCTGA----GGCAGG--AGAATG-GCGTGAACCCGGGAGGCGGAGCTTGCAAGTGAG
      111111*N222222NNN2N2  1*****111*****11**1****111*1111111*1*1**11*1**1*1
```

```
left  AATAAATGAAACAAT---ACACGTGCAAGAAGAAAAACATGGATGAATTATTGTGTAACTGGGAGAAATGGT
chrom  AATAAATGAAACAAT---ACACGTGCAAGAAGAAAAACATGGATGAATTATTGTGTAACTGGGAGAAATGGT
right  CCGAGATCCCACCACTGCCTCCAGCCTGGGCGACAGAGCGA-GACTCCGTCTCAAAAAAAAAATAAATAAA
      111*1**111**1*11111**1*11**11*11111*1*1*11**1**1*111*1*11**1111111**111
```

```
left  TTT-TAAAACCATGGCTCCTAATCCAGATGCAATAAAAAGAAAAGATTTGGCC-----GGGCGCGGTGGCTC
chrom  TTT-TAAAACCATGGCTCCTAATCCAGATGCAATAAAAAGAAAAGATTTATCAACTTGACTGCATTAATAAC
right  TAAATAAAATAAATAAATA--AATAAATA---AATAAAAAGAAAAGATTTATCAACTTGACTGCATTAATAAC
      *111****111**111*111**11*1*111*****111*222*22222*222**22*2222*
```

```
left  A-----TGCCTGTAA-----TCCCAG---CACTTTGGGAGGCCGA--GGC-----GGGCGGAT-C
chrom  AGACAATGCTTACAAGGCAAAACGATGCCATAAAACAAAGTCAAAAAGACAACCTGACAAACTGGGAGGAAAC
right  AGACAATGCTTACAAGGCAAAACGATGCCATAAAACAAAGTCAAAAAGACAACCTGACAAACTGGGAGGAAAC
      *22222***2*22**222222222*2***2222**222*222*2*2*2*22*2*22222***2***22*
```

```
left  ACGAGGTCAGGAGATCGAGACCATCCCGCTAAAACGGTGAAACCCCGTCTCTACTAA-----A
chrom  ATTTGCAAAAACACATCCAGAATAACAATCCTAATATA-TATAAATAAGTCTCAAAACATTTGAGAGAGGA
right  ATTTGCAAAAACACA-----
      *222*222*22*2*11N111NN1N1NNNN1111N1NN21NN11NNNN11111N1NN1N  1
```

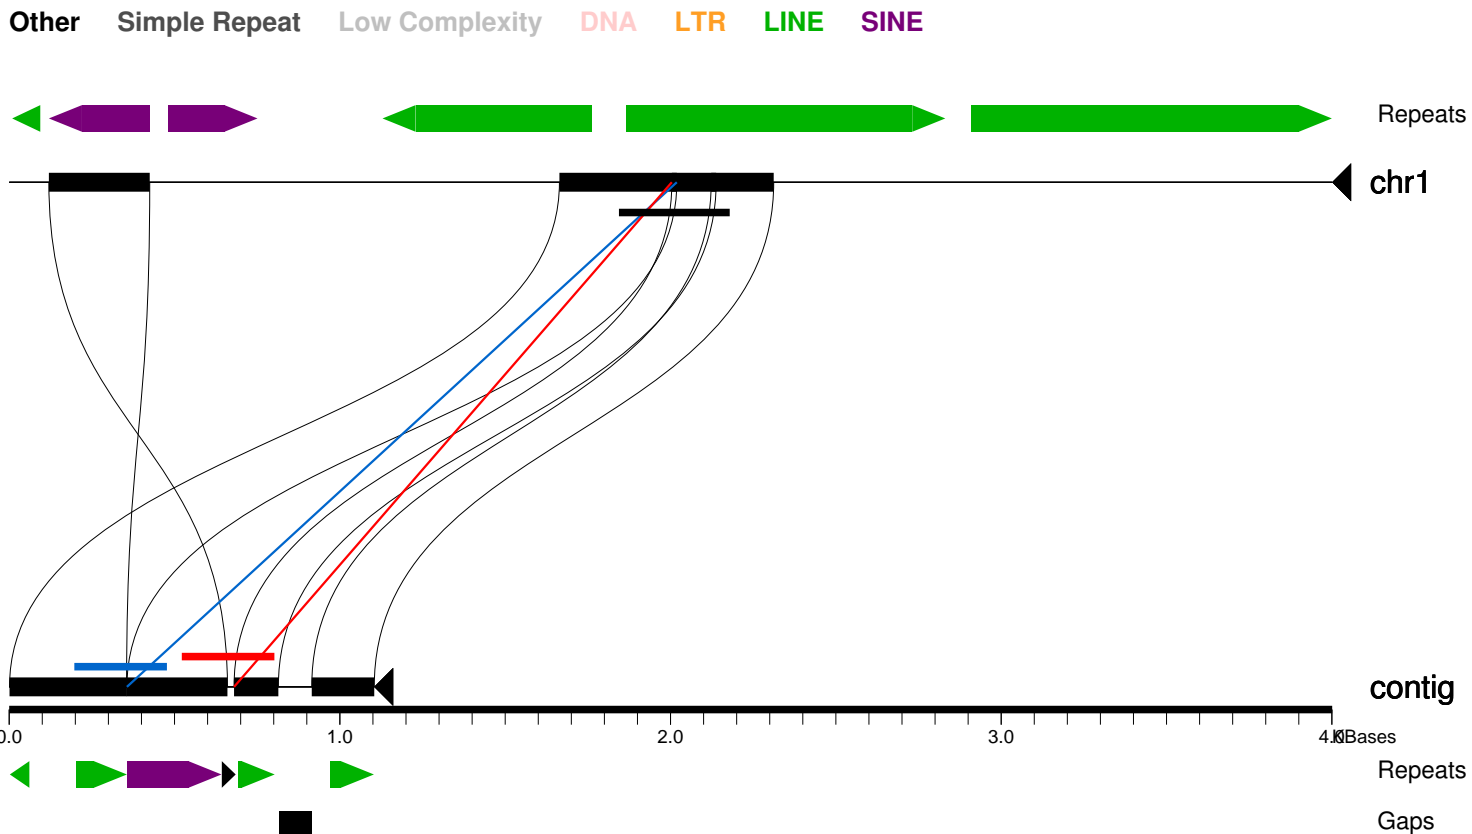





siteID: chr1\_214911000 Scafftig2 - Breakpoint: chr1:214911000

chr1:214910954-214911048

Overlap Length: 14 INS size: 296 Genotyped: Yes

```
left  AGACATTA-----ACTT---TGCAGC-TG-----AGGGTGAATGG-----AAGCAAAAATATTTT
chrom AGACATTA-----ACTT---TGCAGC-TG-----AGGGTGAATGG-----AAGCAAAAATATTTT
right AGTCGAGATCGCGCCACTGCACTCCAGCCTGGGCGACAGAGCGAAACTCCGTCTCAAAAAAAAAAAAAAAAAA
      **1*1111*11111111***1111*1****1**111111**1*1***1111111111**11*****1*1111
```

```
left  GAAAAAACTTAAATTTGGCCGGGTGCGGTGGCTCACGCCTGTAATCCCAGCACTTTGGGAGGCCGAGACGG
chrom GAAAAAACTTAAATCA-----CTTTAGCA-ACTTCAACATTACAATTATTGT-----ATA---
right GAAAAAACTTAAATCA-----CTTTAGCA-ACTTCAACATTACAATTATTGT-----ATA---
      *****222222222*22*2**22**22*222*2*2*2*22*2*2*22222222*2*222
```

```
left  GCG
chrom ---
right ---
      222
```

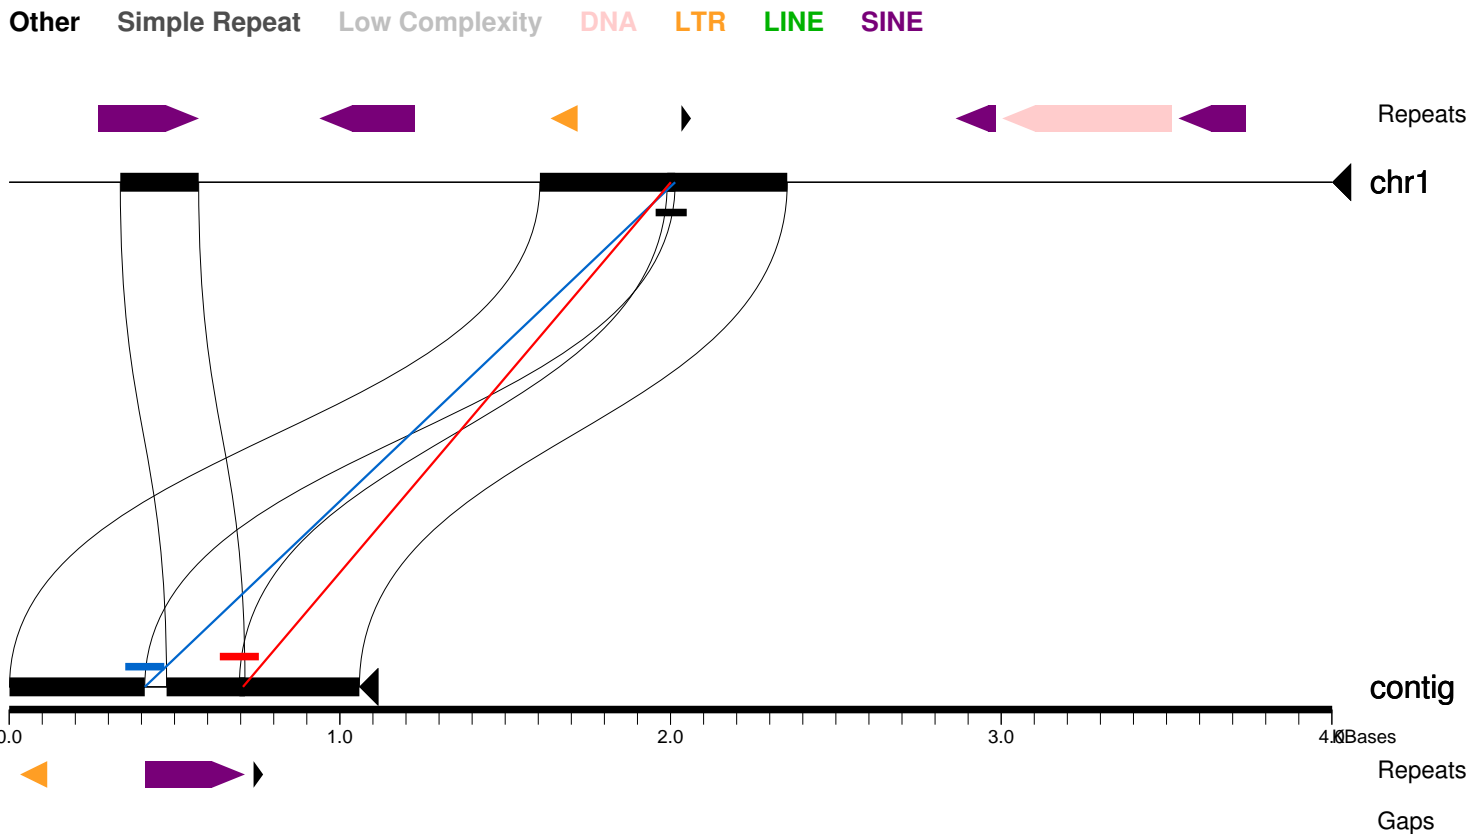











siteID: chr1\_219574694 Scafftig1 + Breakpoint: chr1:219574680

chr1:219574633-219574737

Overlap Length: 13 INS size: 267 Genotyped: Yes

```
left  -----AT--TCTTAATAATGT----TTATAAGCCCCATGCTAGGTAGTAGCCTAATGC--CTTTTTTTT
chrom -----AT--TCTTAATAATGT----TTATAAGCCCCATGCTAGGTAGTAGCCTAATGC--CTTTTCTTT
right GCCGGGATGGTCTCGATCTCCTGACCTCGTGATCCGCCCGCCTCGGCCTCCCAAAGTGCGCCTTTTTCTTT
      1111111**11**11**1111*1111*11*1*1**1*11**111*111*11*11*1***11*****2***
```

```
left  TTTTFFFFFFFFFFFFFFFFFFFFFFFFGAGACGGAGTCTCGCTCTGTCGCCCAGGCTGGAGTGCAGTGG
chrom TTTTAATTGCCACTTA-----ACCCTGCCTCCTTCTTGCAA--TAAAACATATTCA
right TTTTAATTGCCACTTA-----ACCCTGCCTCCTTCTTGCAA--TAAAACATATTCA
      ***22**22222**2222222222222*22**22***22**222**222*22*2222*2*22
```

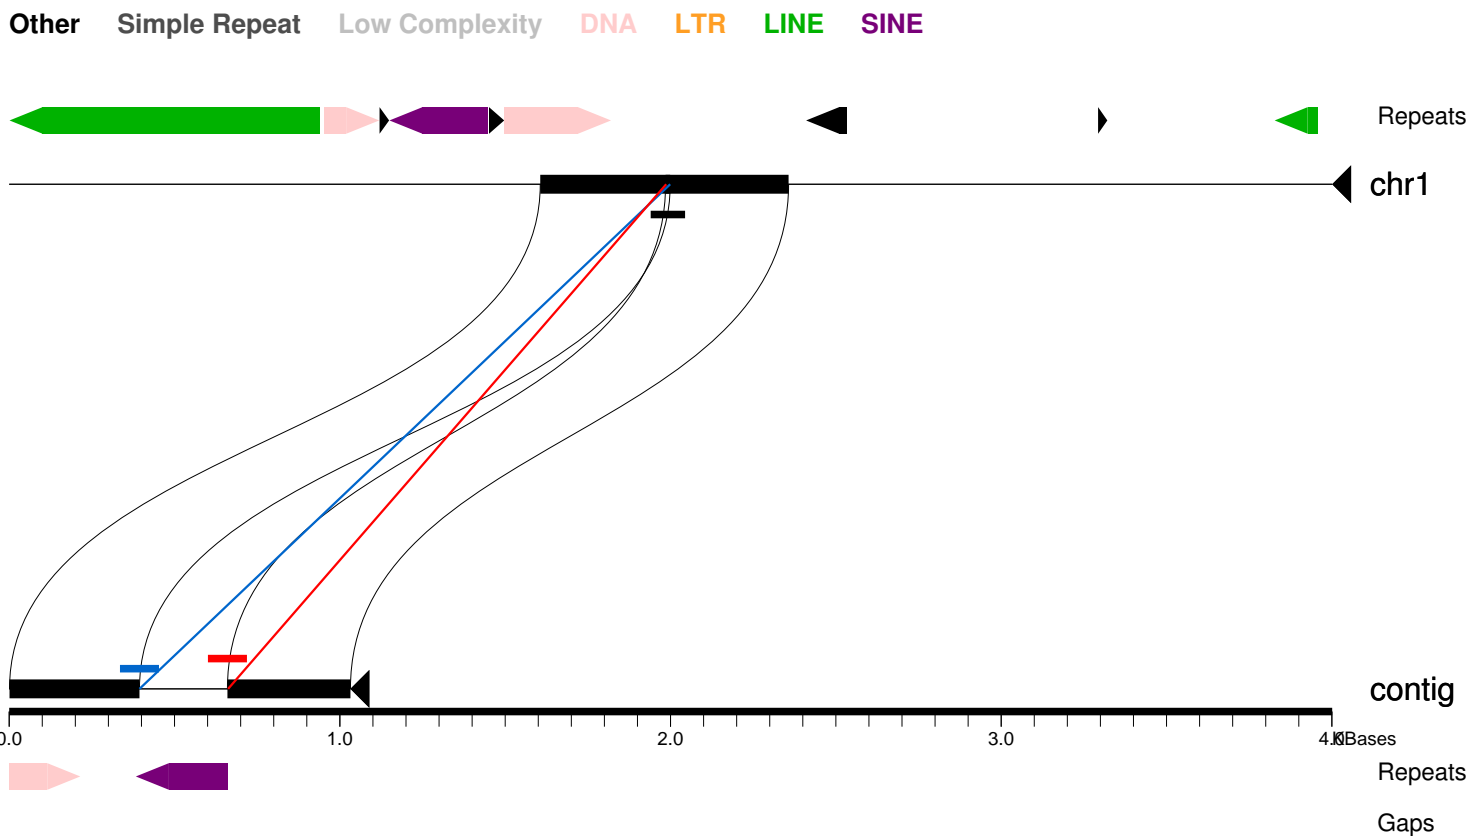









siteID: chr1\_225996432 Scafftig2 - Breakpoint: chr1:225996421

chr1:225996374-225996480

Overlap Length: 13 INS size: 297 Genotyped: Yes

```
left  TGGCGTTAAGTCCTGACTC--CTAC-----CTGTTTCACCATCACTGCAGTTTTAAGAGTAACG
chrom TGGCGTTAAGTCCTGACTC--CTAC-----CTGTTTCACCATCACTGCAGTTTTAAGAGTAACG
right TCCACTGCACTCCAGCCTGGGCGACAGAGCGAGACTCCGTCTCAAAAAAAAAAAAAAAAAA--AAGAGTAACG
      *1111*11*1***1*1**111*1**11111111111*1**1***11*11*1111*11111*****
```

```
left  AATGGCCGGGCGCGGTGGCTCACGCCTGTAATCCCAGCACTT-TGGGAGGCCGAGGCGGGCGG
chrom AATTT--GGGTCCCCTGG-TGAAGTGGCCAGAGGCAGAGCTTCTGTGTGAACT-----
right AATTT--GGGTCCCCTGG-TGAAGTGGCCAGAGGCAGAGCTTCTGTGTGAACT-----
      **2222***22*22***2*2*2*22222*2222***22***2**2*2*22*2222222222
```

Other Simple Repeat Low Complexity DNA LTR LINE SINE

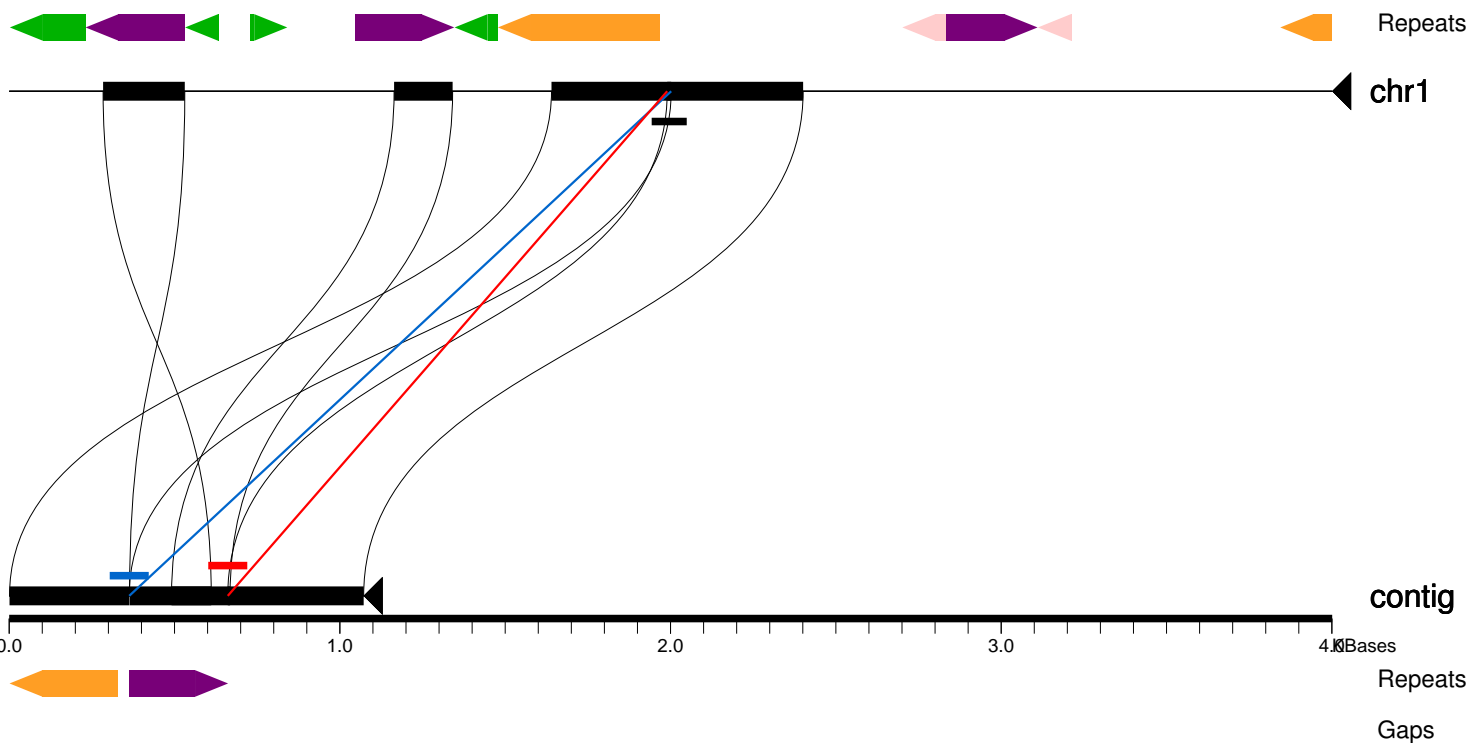



siteID: chr1\_227462940 Scafftig2 - Breakpoint: chr1:227462943

chr1:227462897-227462987

Overlap Length: 14 INS size: 310 Genotyped: Yes

```
left  TTAAG----ACATAACTCTAAACAATTC-ACAG-----GTC-----AAAAATAAAAA
chrom TTAAG----ACATAACTCTAAACAATTC-ACAG-----GTC-----AAAAATAAAAA
right GATCGCGCCACTGCACTCCAGCCTGGGCGACAGAGCGAGACTCCGTCTCAAAAAAAAAAAAAAAAAA
      1111*1111**111*****1*11*1111*1****11111111111***11111111111*****1*****
```

```
left  TTAGAAAGCAGAGGGCATGGCCGGGCGCGGTGGCTCACGCCTGTAATCCCAGCACTTTGGGAGGCCGAGG
chrom TTAGAAAGCAGAGGGCAT-----TTA-GAATGGAATAATAATAAA-----AAGACAACA
right AAAAAGCAGAGGGCAT-----TTA-GAATGGAATAATAATAAA-----AAGACAACA
      11*1*****2222222222222222*2*2*22**2***222*22*2222222*2*2*2*22
```

```
left  TGGGCGG
chrom T-----
right T-----
      *222222
```

Other Simple Repeat Low Complexity DNA LTR LINE SINE

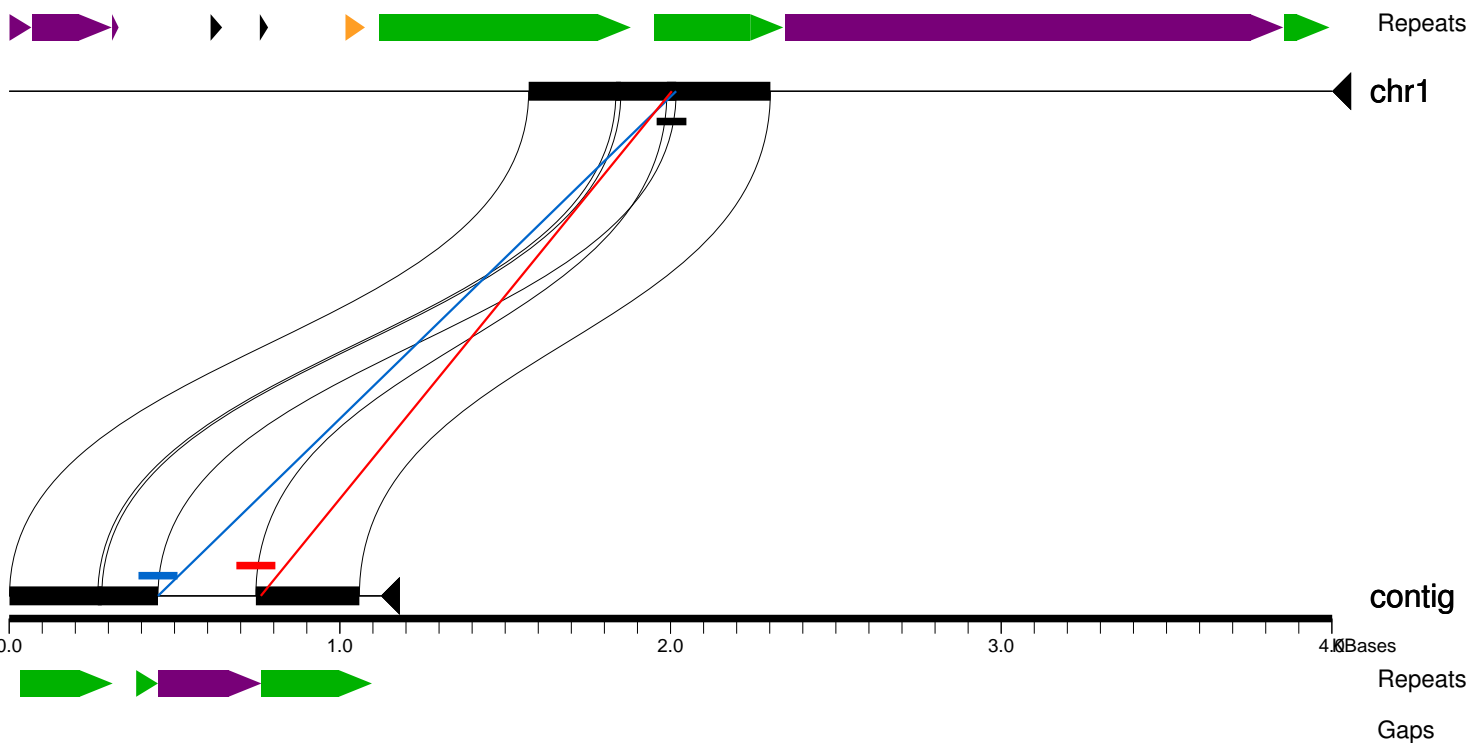



siteID: chr1\_232587763 Scafftig7 - Breakpoint: chr1:232587761

chr1:232587715-232587820

Overlap Length: 14 INS size: 295 Genotyped: Yes

```
left  -----GCAAAACATTCCTGT-----AGACCAAGAA--GGTCACTGAAAAATGTGTTAGTTAAAAATGTGG
chrom -----GCAAAACATTCCTGT-----AGACCAAGAA--GGTCACTGAAAAATGTGTTAGTTAAAAATGTGG
right CGCCACTGCACTCCAGCCTGGGCGACAGAGCGAGACTCCGTCTCAAAAAAAAAAAAAAAAAAAAAA-AAAAAATGTGG
      11111111***111*11***1111111***1*1***1111***1*11***1111111*111*****
```

```
left  CATGCGCGGGCGCGGTGGCTCACGCCTGTAATCCCAGCACTTTGGGAGGCCGAGGCGGGCGGA
chrom CATATCAAACTGTAAGAATAACAA--GTAATTCATTAGAT-----GGCATCCTCA
right CATTATCAAACTGTAAGAATAACAA--GTAATTCATTAGAT-----GGCATCCTCA
      ***22*222*22222*22*2**2222*****2***22*22*2222222222***222*22*
```

Other Simple Repeat Low Complexity DNA LTR LINE SINE

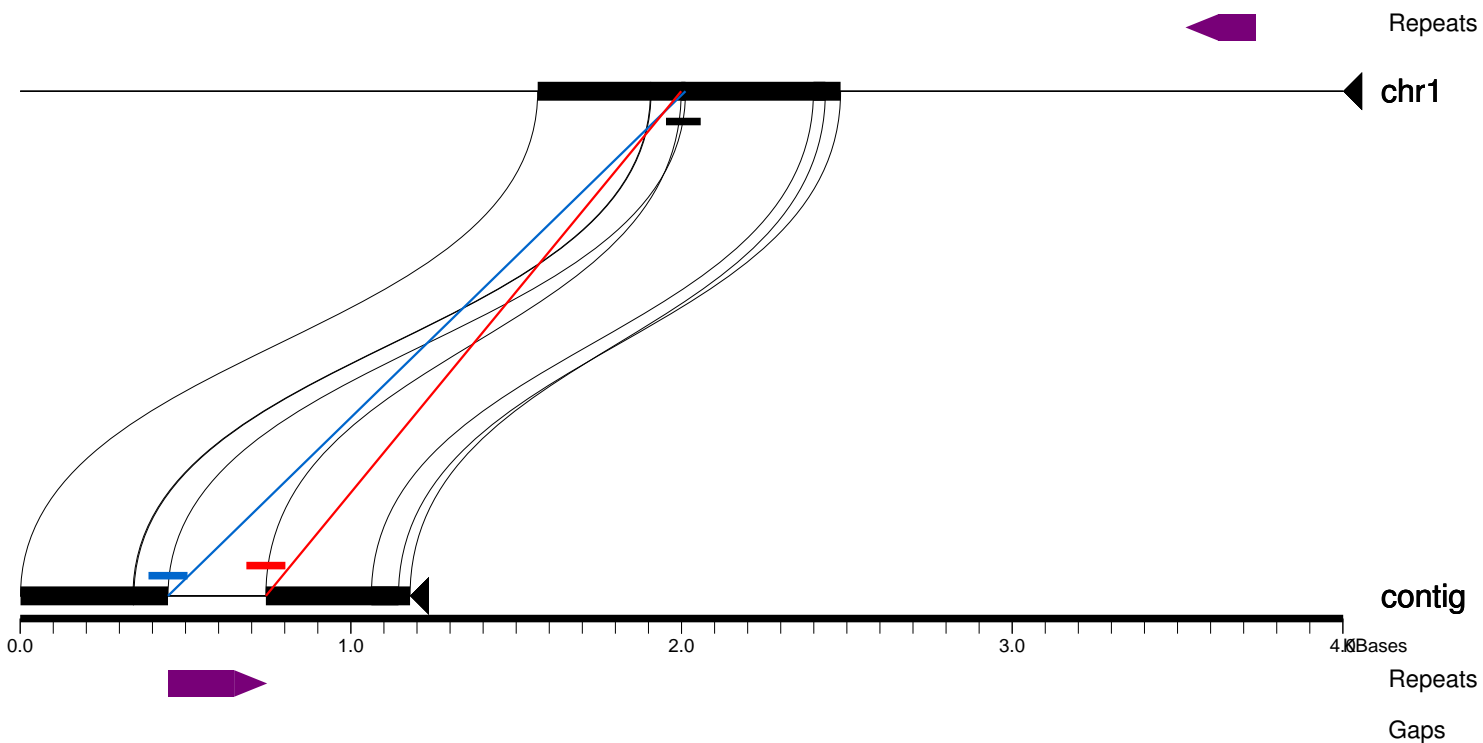







siteID: chr1\_234070554 Scaffitig1 - Breakpoint: chr1:234070553

chr1:234070505-234070612

Overlap Length: 12 INS size: 301 Genotyped: Yes

```
left AAAGC-CACTGGCTTTCCCTCTGAAGCAAAGGTAGCTCCCTATGCAGAT-----AAACAATGTTT
chrom AAAGC-CACTGGCTTTCCCTCTGAAGCAAAGGTAGCTCCCTATGCAGAT-----AACAATGTTT
right ACTGCACTCCAGCCTGGGCGACAGAGCGAGACTCCGTCTCAAAAAAAAAAAAAAAAAAAAAAAATAAAAAATGTTT
      *11**1*1*11**1*111*11111***1*111*111**1*1*111*1*111111111111***1*****
```

```
left CG--GCCGGGCGCGGTGGCTCACGCCTGTAATCCAGCACTTTGGGAGGCCGAGGCGGGCGG
chrom CAATGAAAATCTAAGTGGATCCTGTCTTT--TACAAA-----GAAGCTGTGTCTAG---
right CAATGAAAATCTAAGTGGATCCTGTCTTT--TACAAA-----GAAGCTGTGTCTAG---
      *222*22222*222***2**22*2**2*22*2*2*222222222**2**2*2*2*22*222
```

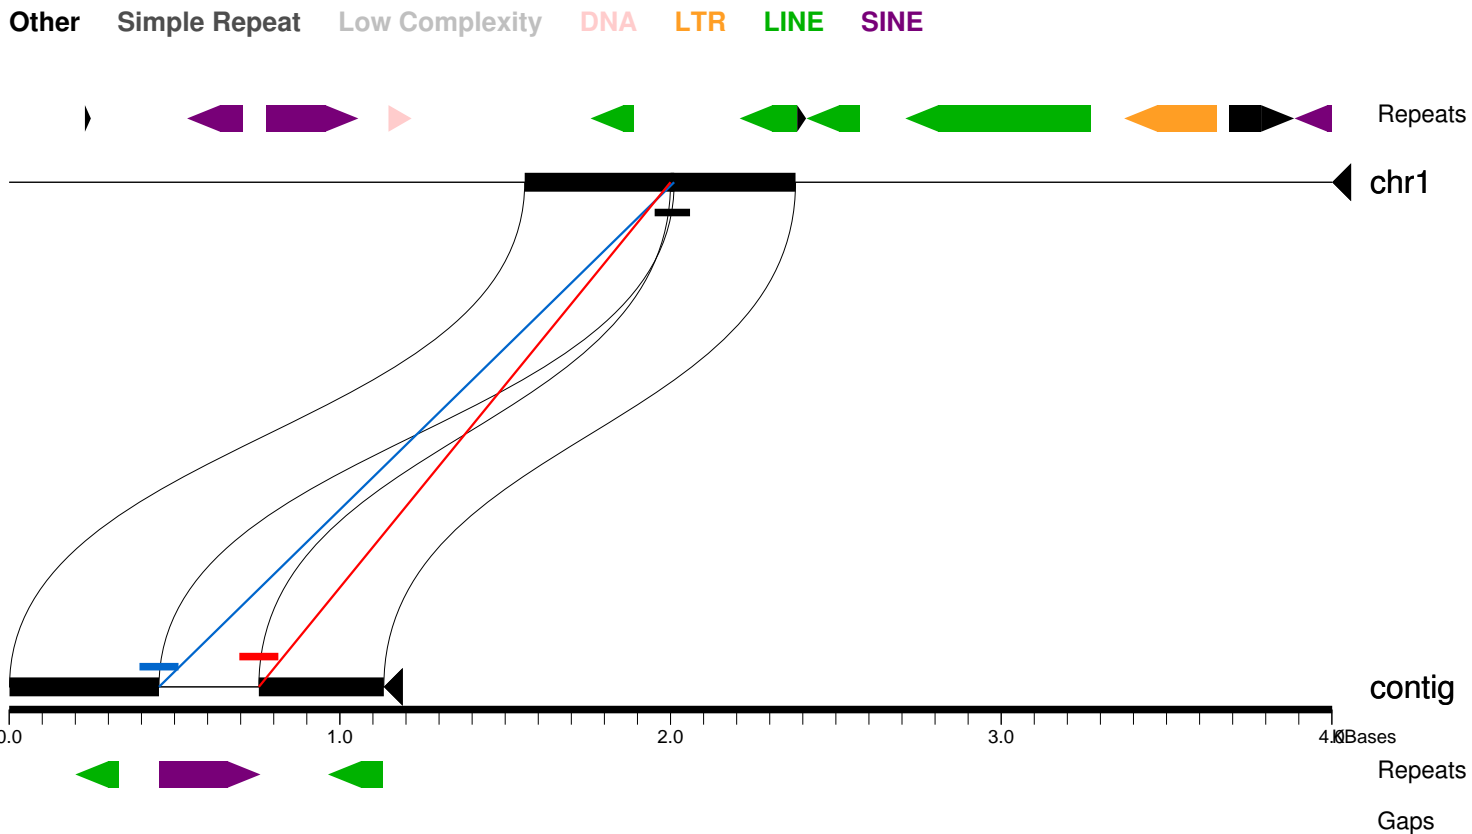

siteID: chr1\_234805722 Scafftig1 - Breakpoint: chr1:234805713

chr1:234805553-234805886

Overlap Length: 14 INS size: 312 Genotyped: Yes

left A-----GAA----TTGAAGAGTTTTGTCTTGAT--TTAACATCAAATAAAATTTTAGATACAGCCAT  
chrom ACAACAATAGAA----TTGAAGAGTTTTGTCTTGAT--TTAACATCAAATAAAATTTTAGATACAGCCAT  
right TTTAGTAGAGACGGGGTTTCACCGTTTTAGCCGGGATGGTCTCGATCTCCTGACCTCGTGATCCGCC--  
1NN2NN2N2\*\*11111\*\*11\*11\*\*\*\*\*111\*11\*\*11\*1111\*\*111\*1\*11\*111\*\*1\*11\*\*11

left AATATGTCACAAAGGCAAAAAACACAACAGTTTTTAAACCTCTATAATCAATTACAAGAGTAAAAATTAATGT  
chrom AATATGTCACAAAGGCAAAAAACACAACAGTTTTTAAACCTCTATAATCAATTACAAGAGTAAAAATTAATGT  
right -----GCCTC---GGCCT---CCCAA-AGTGCTGGG-----ATTACAGGCGTGAGCCACCGCG  
11111\*1\*1\*111\*\*11111\*1\*\*1\*\*11\*1111111111111111\*\*\*\*\*1\*1\*\*1\*111111111

left CCAAGCCATTTAAAAATGGGGTTAAGTTGATTATATTTTTTTT-----TTTTTTTTTTTTTTTTT  
chrom CCAAGCCATTTAAAAATGGGGTTAAGTTGATTATATGTTTTCTAATAAAAAAGGGCTCTGTGTCTATGTGTG  
right CCGGCC-----TGATTATATGTTTTCTAATAAAAAAGGGCTCTGTGTCTATGTGTG  
\*\*11\*\*11111111111111111111\*\*\*\*\*2\*\*\*2\*22222222222\*2\*2\*2\*2\*2\*2\*2\*2

left TTTTTTTTTTTTTTTGAGGCGGAGTCTCGCTCTGT---CACC-CAGGCTGGA-----GTGCAGTGG  
chrom TGTGTGTCTATAAAAATACAAATTTTCCTTGTTTTTCCACCTCTTCCTTGACGGTCCATTCTGTACTG  
right TGTGTGTCTATAAAAATACAAATTTTCCTTGTTTTTCCACCTCTTCCTTGACGGTCCATTCTGTACTG  
\*2\*2\*2\*2\*2\*222\*22\*22\*2\*2\*\*22\*2\*2\*222\*\*\*2\*222\*\*2\*2222222222\*2\*2\*2\*\*\*

left CGGGA-----TCT---CGGCTCA--CTGCAAGCTCCG---CCTCCCGGGTTCACG--  
chrom CACCAGATTAATCTTTTACAGGTGAGACTCCAAGTTCACAAAACCTTCCCCAGCTCACCTT  
right CACCAGATTAATCTTTTACAGGTGAGACTCCAAGTTCACAAAACCTT-----  
\*222\*222222\*\*\*2222\*2\*2\*2\*22\*\*2\*\*\*2\*222222\*2\*111NN1N1111N

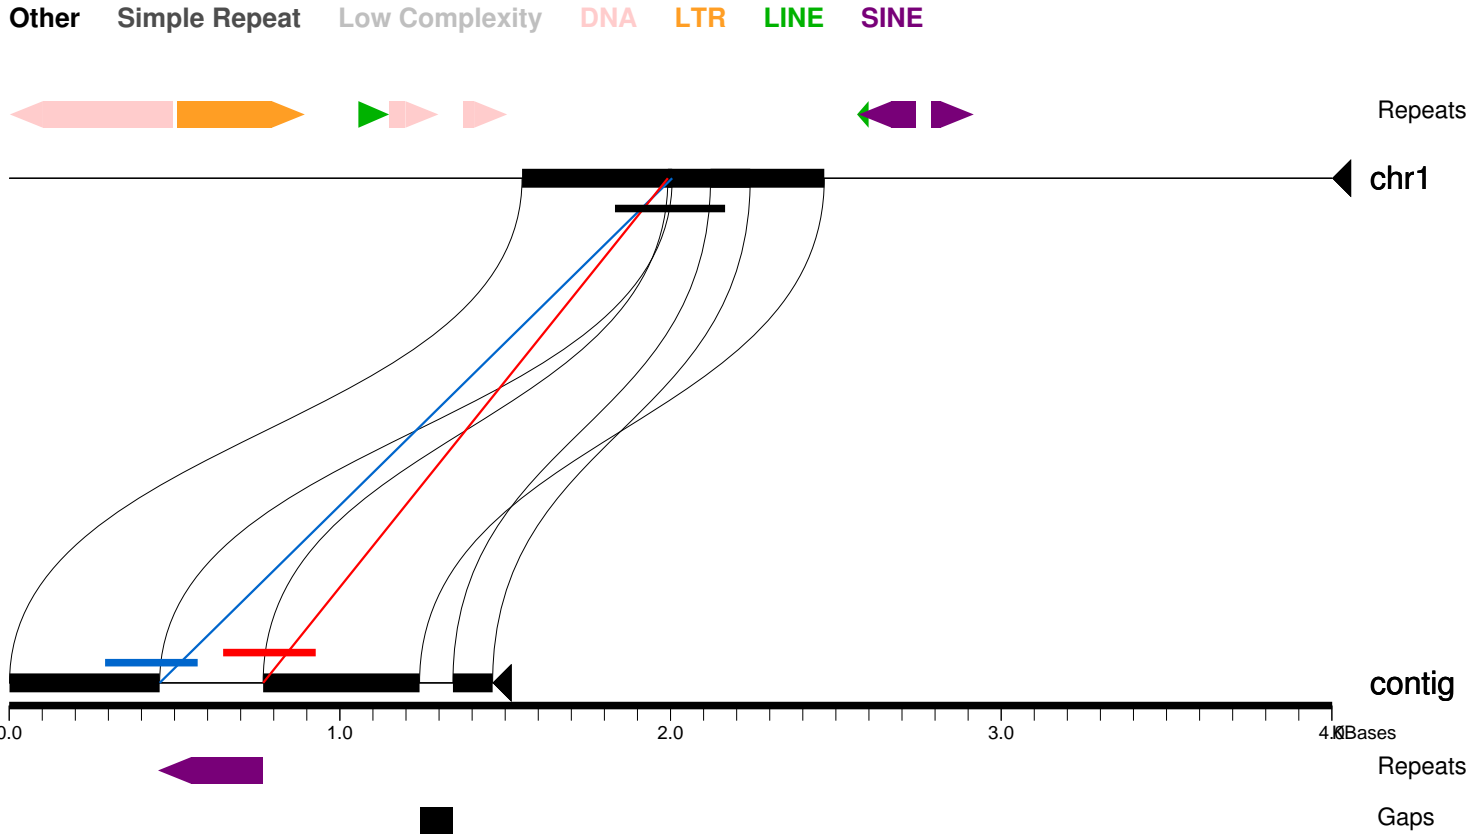



siteID: chr1\_237569188 Scafftig4 + Breakpoint: chr1:237569195

chr1:237569162-237569254

Overlap Length: 14 INS size: 307 Genotyped: Yes

```
left  GTGGATTTGT-GACCACC-----ATT-CAGAAAAGTA-----GGTGAAAAAACTTT
chrom GTGGATTTGT-GACCACC-----ATT-CAGAAAAGTA-----GGTGAAAAAACTTT
right CCGCCCGCCTCGGCCTCCCAAAGTGCTGGGATTACAGGCGTGAGCCACCGCGCCCGGCCGAAAAAACTTT
      11*111111*1*1**1**111111111111***1***1111*11111111111111*11*****
```

```
left  CTTTTTTTTTTTTTTTTTTTTTTTTTTTTGGAGACGGAGTCTCGCTCTGTCGCCCAGGCTGGAGTGCAGTG
chrom CTAACTTTATCTCTTCAT-----CCCACCATCAACCA--CTGAGGT--ATTC
right CTAACTTTATCTCTTCAT-----CCCACCATCAACCA--CTGAGGT--ATTC
      **222***2*2*2**22*22222222222222222222222222222222*2*2*22**22***22***22*2*2
```

```
left  GCGGG
chrom TTGCA
right TTGCA
      22*22
```

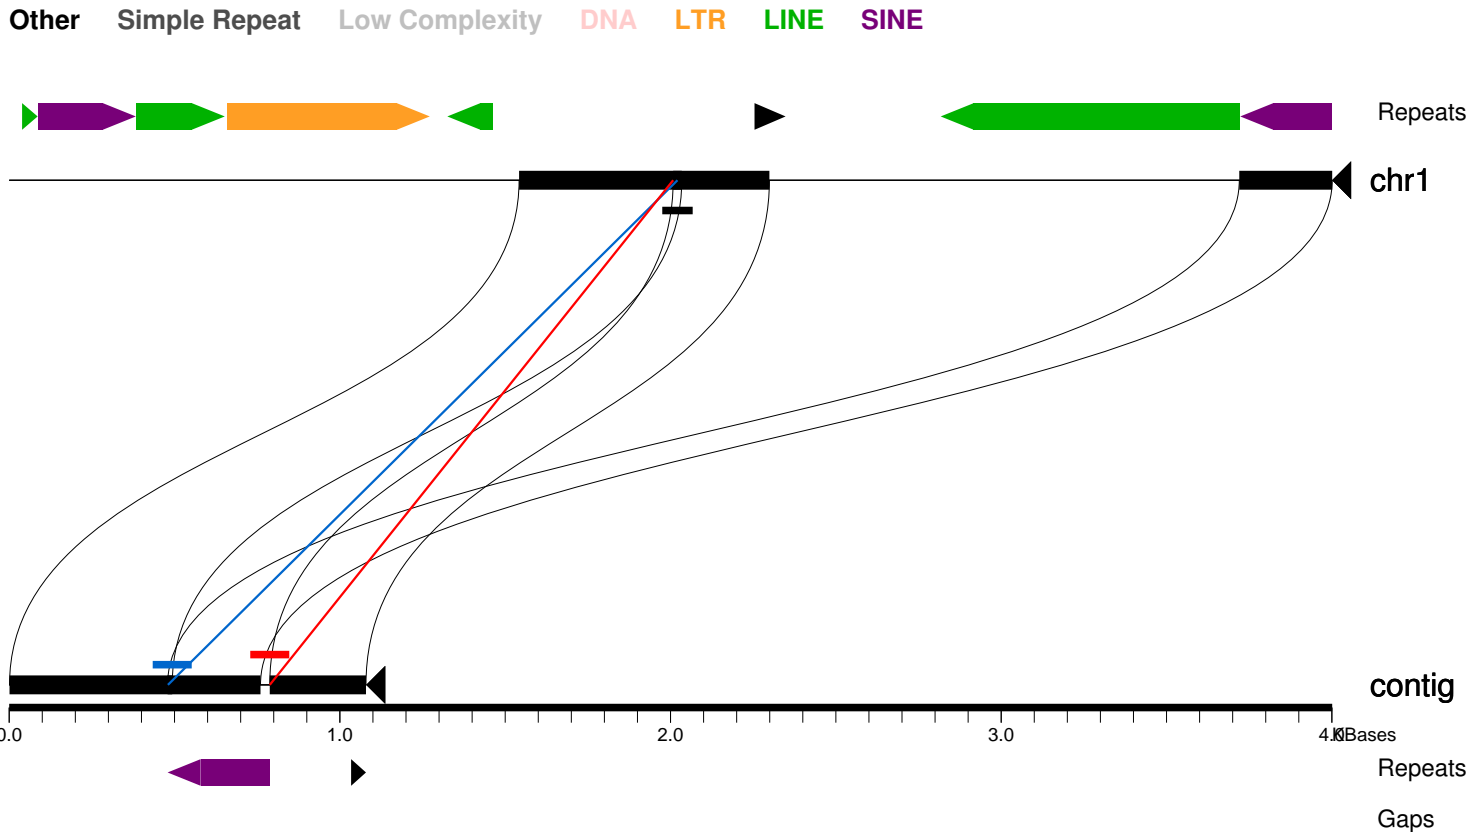





siteID: chr1\_239780141 Scaffitig1 - Breakpoint: chr1:239780149

chr1:239780098-239780205

Overlap Length: 9 INS size: 316 Genotyped: Yes

```
left  ATGTGGTATTTGAAGACAGGT-----GTTTCTAAATGATGTTATCAGATTTTTTAAA---AATATTC
chrom ATGTGGTATTTGAAGACAGGT-----GTTTCTAAATGATGTTATCAGATTTTTTAAA---AATATTC
right GTCCGGCCTGGGC-GACAGAGCGAGACTCCGTCTCAAAAAAAAAAAAAAAAAAAAAAAAAAATATTC
      1*11*11*11*11*****111111111111**1**1***11*1111*11*1*11111***111*****
```

```
left  CAGGCCGGGCGCGGTGGCTCACGCCTGTAATCCCA-GCACTTTGGGAGGCCGAGGCGGGTGG
chrom CAAATC-----CATTAG-TCAT---TGTTGTGCAATGCAGAGTGC-AG--CATTCTTTCTT
right CAAATC-----CATTAG-TCAT---TGTTGTGCAATGCAGAGTGC-AG--CATTCTTTCTT
      **222*22222*22*2*2***2222***22*2*2*2***222**22*22*22*2222*22222
```

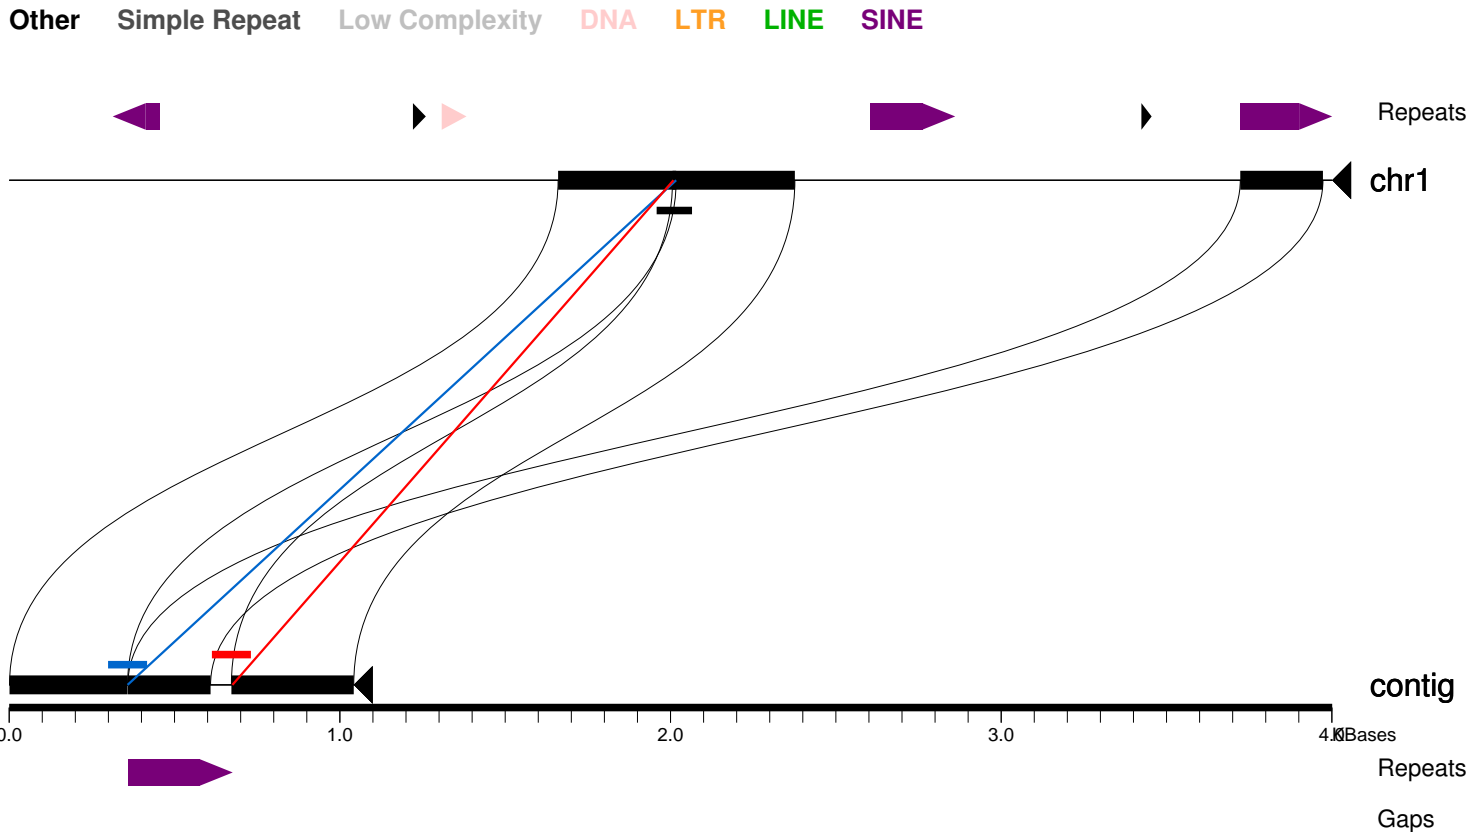



siteID: chr1\_246592331 Scaffitg1 - Breakpoint: chr1:246592331

chr1:246592171-246592497

Overlap Length: 7 INS size: 412 Genotyped: No

```

left  -----AGAGCTAGCTTGCAGCTCAGTCTGGCTCCCCCTCAGGA
chrom TCTCTCCAGTTCCTCTGCTCTGCCCTCTTCCAGAGCTAGCTTGCAGCTCAGTCTGGCTCCCCGTCAGGA
right TTT----AGTAGAGACGGGGTTTCAC-CTT-----GTTAGC---CAGGATGGTCTCGATCTCCTG-----
      2N2      222NNNNN2N2NNN2N2N2 222 111*1****111**1111****1*1*1**N111111

```

```

left  ATATTATAGATGCCAATGGGTCCTGGAACCTACCT-GTACTCATATAAAAAGGGGAGAGCACAAGCATTC
chrom ATATTATAGATGCCAATGGGTCCTGGAACCTACCT-GTACTCATATAAAAAGGGGAGAGCACAAGCATTC
right ACCTCGT-GATCCGCCCG---CCTCGGCCTCCCAAAGTGCTGGGATTACAGGCGTGAGC-----CACCGC
      *11*11*1***1*1111*111***1*11*1**111*1**111*1*1***1*1***11111**111*

```

```

left  TTCCTACCAAACAAAAGCTCTGAGTCTC-----NNNNNNNNNN-----
chrom TTCCTACCAAACAAAAGCTCTGAGTCTC-----NNNNNNNNNN-----
right GCCCGGCC-----GAGTCTCACTTTAATAGGACAGATCAGGTATTGTTCCACACAGAAC
      11**11**11111111111111111******2222222222222222222222222222222222222222222

```

```

left  -----
chrom AACCACCGTAGACAGGGAATAAGGTTGCCAGAGTTATCTATGCCAATGGGAACCCACCACAGGTACAGT
right AACCACCGTAGACAGGGAATAAGGTTGCCAGAGTTATCTATGCCAATGGGAACCCACCACAGGTACAGT
      222222222222222222222222222222222222222222222222222222222222222222222222222222222

```

```

left  -----
chrom AATAAGGGAAGTCTACCCACCAAACCTGCAAAACTGCCATGTAATGA
right AATAAGGGAAGTCTACCCACCAAACCTGCAAAACTGCCAT-----
      22222222222222222222222222222222222222222222222222222222222222222222222222

```

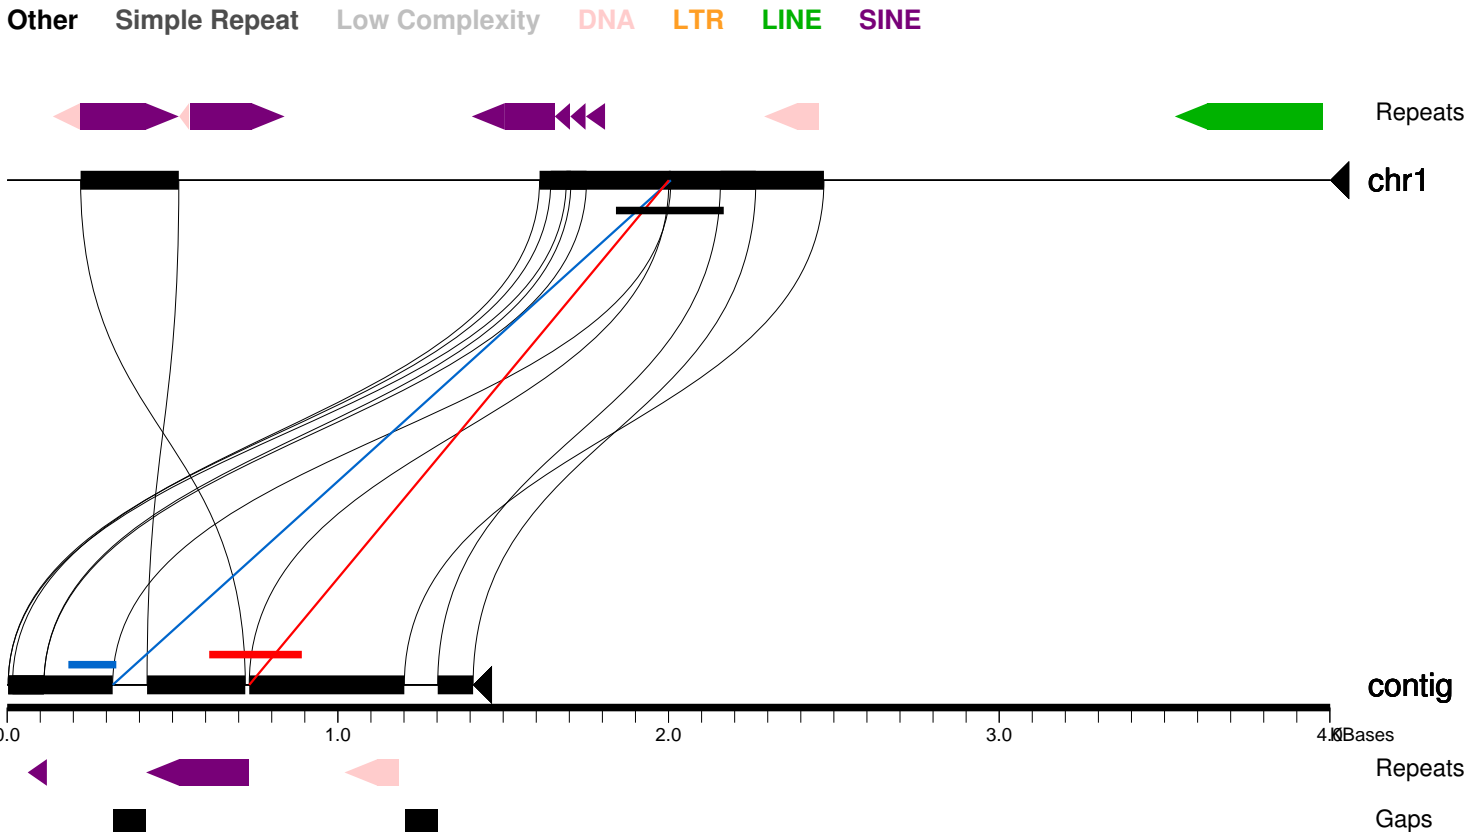



siteID: chr1\_247865113 Scafftig1 - Breakpoint: chr1:247865123

chr1:247865075-247865175

Overlap Length: 12 INS size: 307 Genotyped: Yes

```
left AA-----CTAGTAAACTGTACCAAGAACC--TCTTAGTATTATTTCTTAAAACTA-----CAT
chrom AA-----CTAGTAAACTGTACCAAGAACC--TCTTAGTATTATTTCTTAAAACTA-----CAT
right ACTGCACTCCAGCCTGGGCGACAG-AGCGAGACTCCGTCTCAAAAAAAAAAAAAAAAAAAAAAAAAAAAAAAACAT
*1111111111111111**1*111**1*1*1*1***11*11***1*11*11*1111111****11*1111111***

left GTGAAACTAGGCCGGGCGCGGTGGCTCACGCCTGTAATCCCAGCACTTTGGGAGGCCGAGGCGGGCGG
chrom GTGAAACTAA-----AATGAC-CTTATAAT---AACAAATTTTAATGGAAAAGTATACT-
right GTGAAACTAA-----AATGAC-CTTATAAT---AACAAATTTTAATGGAAAAGTATACT-
*****2222222222222222*2**2*2*2**222*2**22**222*2*222*2*2222*22
```

Other Simple Repeat Low Complexity DNA LTR LINE SINE

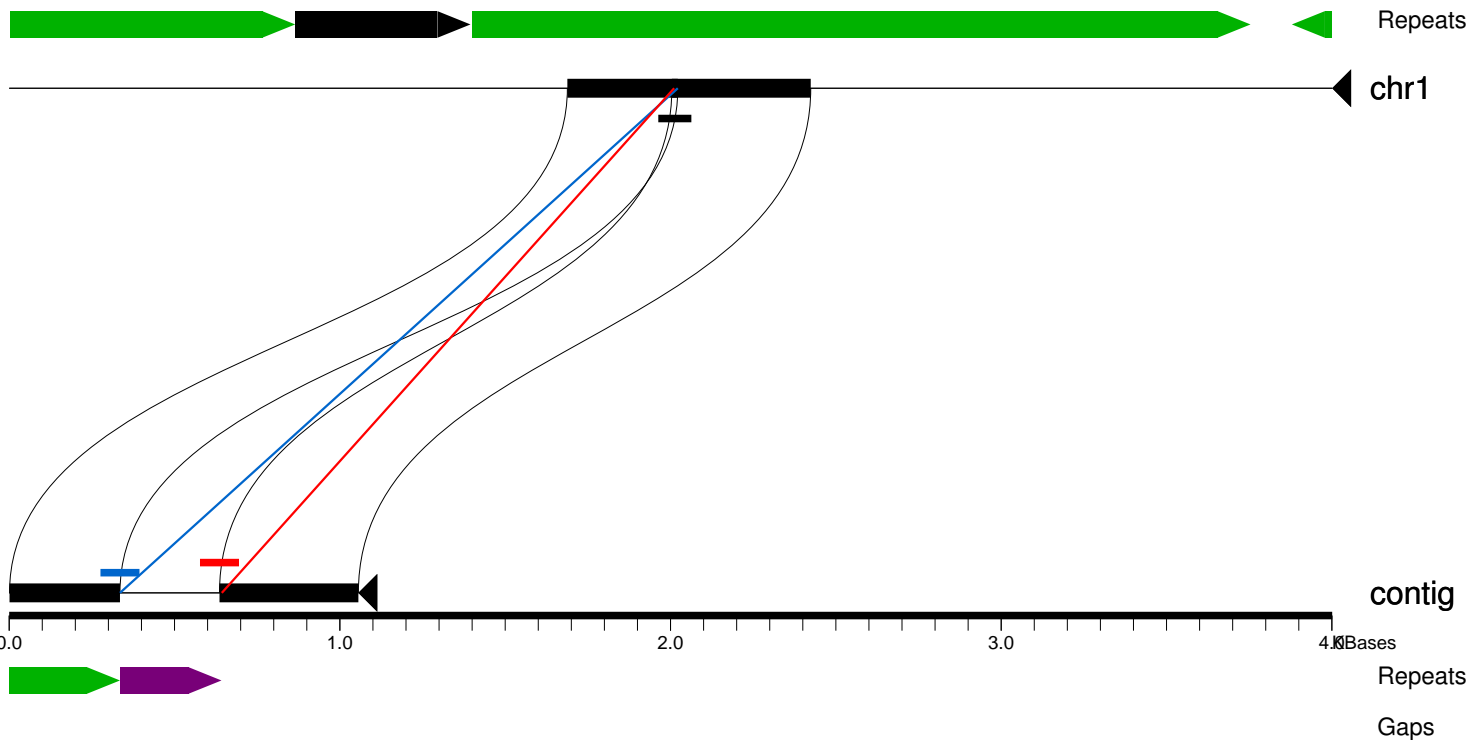









siteID: chr1\_8446641 Scaffitg2 - Breakpoint: chr1:8446628

chr1:8446468-8446795

Overlap Length: 8 INS size: 308 Genotyped: Yes

```
left  -----CCTGTCTCATAAAGACAGTAA-AGCCACACAAATAAGGGTTTCCACTCCCTGGGCCTGAGCTCT
chrom TGTGGCCCTGTCTCATAAAGACAGTAA-AGCCACACAAATAAGGGTTTCCACTCCCTGGGCCTGAGCTCT
right TTTAGTAGAGACGGGGTTTCACCGTTTTAGCCGGG-----ATGGTCTCGATCTCCTGACCTCGTGATCC
      2N2N2N111*1*11111111**1**111****111111111*1***1**1*111****11*11*1*1**1
```

```
left  GAAACCCAGCCAAGACAGAATCCCAAACAGCCAGAGAGCTTCCTTTTCTGAAGGCAGTGAACACTGAACATAC
chrom GAAACCCAGCCAAGACAGAATCCCAAACAGCCAGAGAGCTTCCTTTTCTGAAGGCAGTGAACACTGAACATAC
right G----CCCGCCTCGGCC---TCCCAAAGTGCTGG---GATTAC-----AGGC-GTGAGCC-----
      *1111**1***11*1*1111*****11**11*111*1**1*11111111****1****1*1111111111
```

```
left  ATTATTTAAGATGAATATCTAGAACTCTTTTTTTTTTTTTT-----TTTTTTTTTTTTTTGAGAC
chrom ATTATTTAAGATGAATATCTAGAACTCTTACAAATGAAAAAGAAAAGGACAATCCATTGAAAAATAAGCA
right -----ACCGCGCCCGGCCGAACTCTTACAAATGAAAAAGAAAAGGACAATCCATTGAAAAATAAGCA
      11111111*1111*111111*11*1*****22222*2222222222222222*222**222222*2**22
```

```
left  GGAGTCTCGCTCTGTTGCCAGGCTGGAGTG----CAGTGGCGGGATCTCGGCTCACTGCAAGCTCCGCC
chrom AAAGACTTACACAG--GCCCTTCATGAAAAAGAAAACACAAACAGCCAATAAACTCATTATAGGATGCCCA
right AAAGACTTACACAG--GCCCTTCATGAAAAAGAAAACACAAACAGCCAATAAACTCATTATAGGATGCCCA
      22**2**22*2*2*22****2222*2*2222222*2222*2*2222*222****2*22*2*2*2*2*2
```

```
left  T-----CCCGGG---TTCA--CGCC-----ATTCTCC
chrom ATATGATTAGTAACCAGGGAAAATACAAACTCCTCAAATGCCCAAATTTCTTT
right ATATGATTAGTAACCAGGGAAAATACAAACTCCTCAAATGCC-----
      2222222222222*2**222*2**22*2**222222222  11111NN
```

Other Simple Repeat Low Complexity DNA LTR LINE SINE

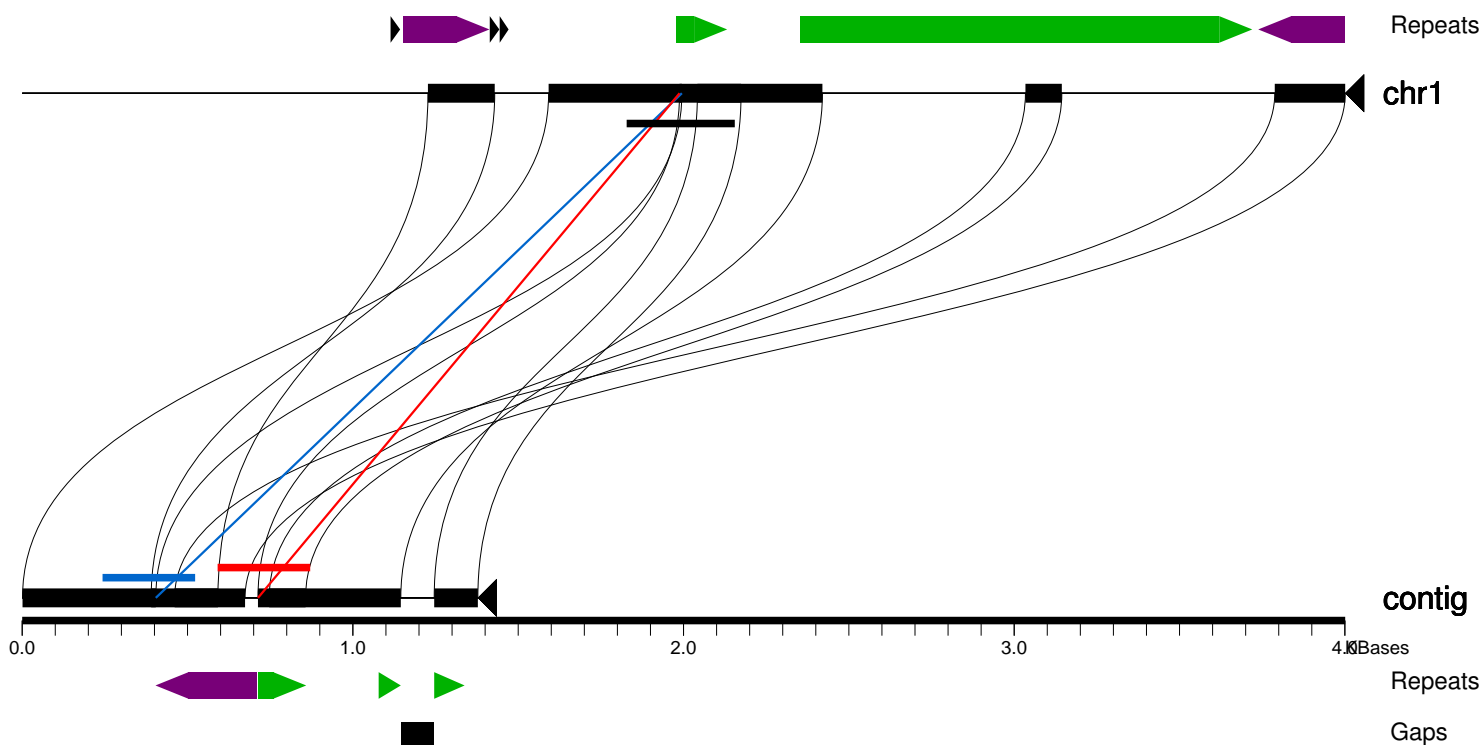

siteID: chr10\_107285663 Scaffitig1 + Breakpoint: chr10:107285490

chr10:107285447-107285549

Overlap Length: 17 INS size: 131 Genotyped: Yes

```
left  -----TGGTAATTGAAAAATATAATA-ATTAT--TGATTAAAAATCAGAAAT-----GATTTTTGCTG
chrom -----TGGTAAATTGAAAAATATAATA-ATTAT--TGATTAAAAATCAGAAAT-----GATTTTTGCTG
right CAAGCTCCGCCTCCCGGGTTCACGCCATTCTCCTGCCTCAGCCTCCCAAGTAGCTGGGAAGATTTTTGCTG
      11111*11111*111111*11*1111***1*11*11*1*111*11*1*11111111******

left  ATTTT TTTTTTTTTTTTTTGGAGACGGAGTCTCGCTCTGTGCGCCAGGCTGGAGTGCAGTGGCGCGA
chrom ATTTT TAAAAAGATTTTATAAGTCAATGA-----AAAATAAAATAAAATTAGAAA-A
right ATTTT TAAAAAGATTTTATAAGTCAATGA-----AAAATAAAATAAAATTAGAAA-A
      *****222222*****2*2**2*222*2222222222222222*222*22*2*22*2*2*222*
```

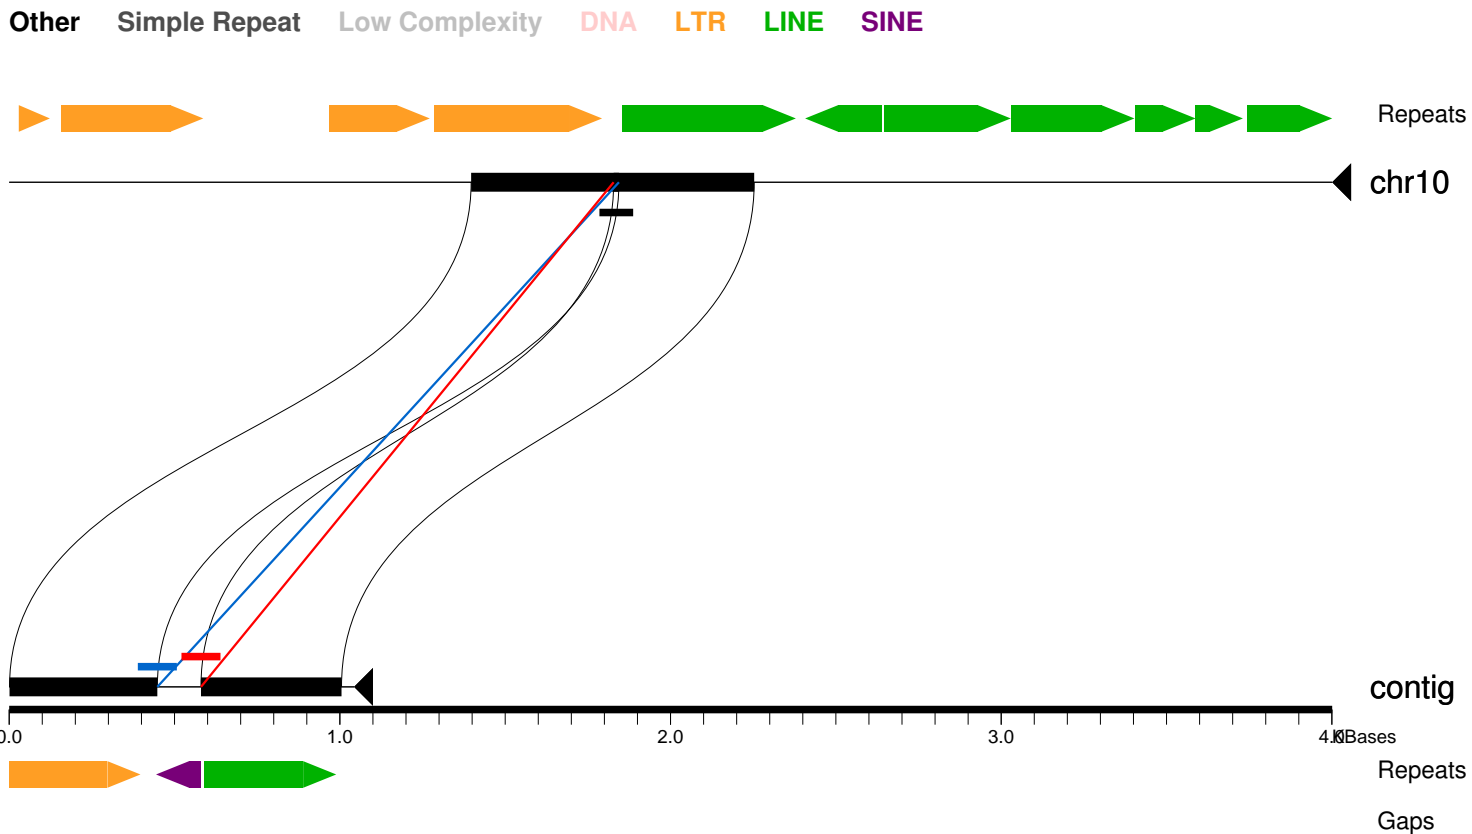

siteID: chr10\_107891565 Scaffitig12 + Breakpoint: chr10:107891547

chr10:107891502-107891606

Overlap Length: 15 INS size: 278 Genotyped: Yes

```
left  TCT-GTGGTCAACA-GAGAGG-----ACAGCGGTGCTGTTTC-----TCTGCTGATTGGAGCACACGT
chrom TCT-GTGGTCAACA-GAGAGG-----ACAGGGGTGCTGTTTC-----TCTGCTGATTGGAGCACACGT
right CCTCGTGATCCGCCCCGCTCGGCCTCCCAAAGTGCTGGGATTACAGGCCTGAGCCACCGGGAGCACACGT
      1**1**1**1**11*11*1111*1111111*1**N*1**111**1*11111*11**11111******
```

```
left  TTTTTTTTTTTGGAGACGGAGTCTCGCTCTGTCGCCAGGCTGGAGTGCAGTGGCGCGATCTCGG
chrom TTTTAA-----ATACT---TCTTTATGCCTTTATTTGATCATGAATATGATATCTGGT
right TTTTAA-----ATACT---TCTTTATGCCTTTATTTGATCATGAATATGATATTTGGT
      ***22222222222222*22**222***2*222**2222*2**2222222222*22**1*2*2
```

Other Simple Repeat Low Complexity DNA LTR LINE SINE

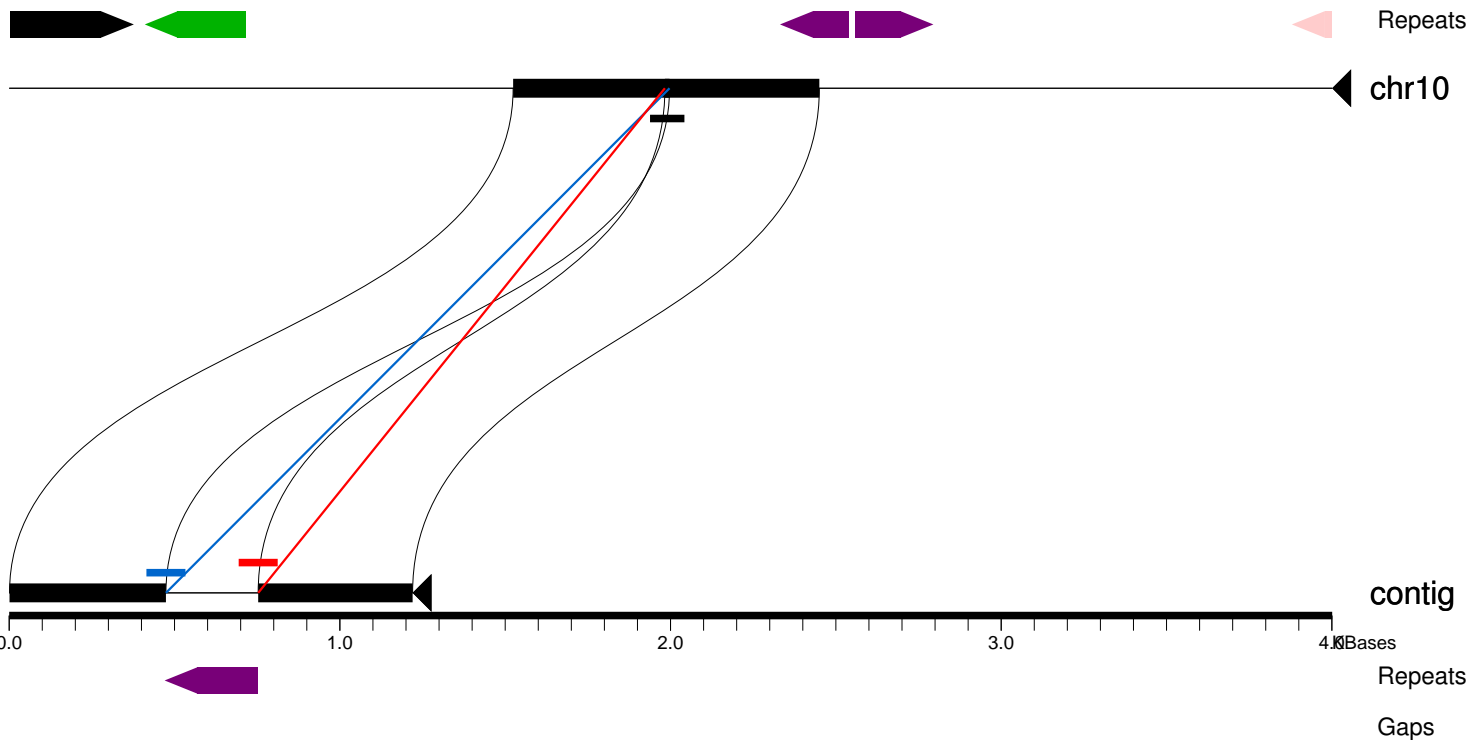

siteID: chr10\_108991291 Scafftig4 + Breakpoint: chr10:108991269

chr10:108991225-108991328

Overlap Length: 16 INS size: 293 Genotyped: Yes

```
left  TAT----TTCATTTTTTTCACACCCCTTTGATTA-----ACACTGTGATAAGT-GCATATTACAC
chrom TAT----TTCATTTTTTTCACACCCCTTTGATTA-----ACACTGTGATAAGT-GCATATTACAC
right CCGCCCGCCTCGGCCTCCCAAAGTGCTGGGATTACAGGCGTGAGCCACCGCGCCCGGCCGCATATTACAC
      1111111111**1111*11**1*111**11*****111111111111***1*1*1111*11*****
```

```
left  ATTTTTTTTTTTTTTTGAGACGGAGTCTCGCTCTGTCGCCAGGCTGGAGTGCAGTGGCGGGAT
chrom ATTTTAA-----GAACCTCAGTTTAGTTAAAAATAACTGA-TGAA----AGTCCCTCC-T
right ATTTTAA-----GAACCTCAGTTTAGTTAAAAATAACTGA-TGAA----AGTCCCTCC-T
      ***2222222222**22*22***2*2*2*22222222*2*22**2*2222***22*2222*
```

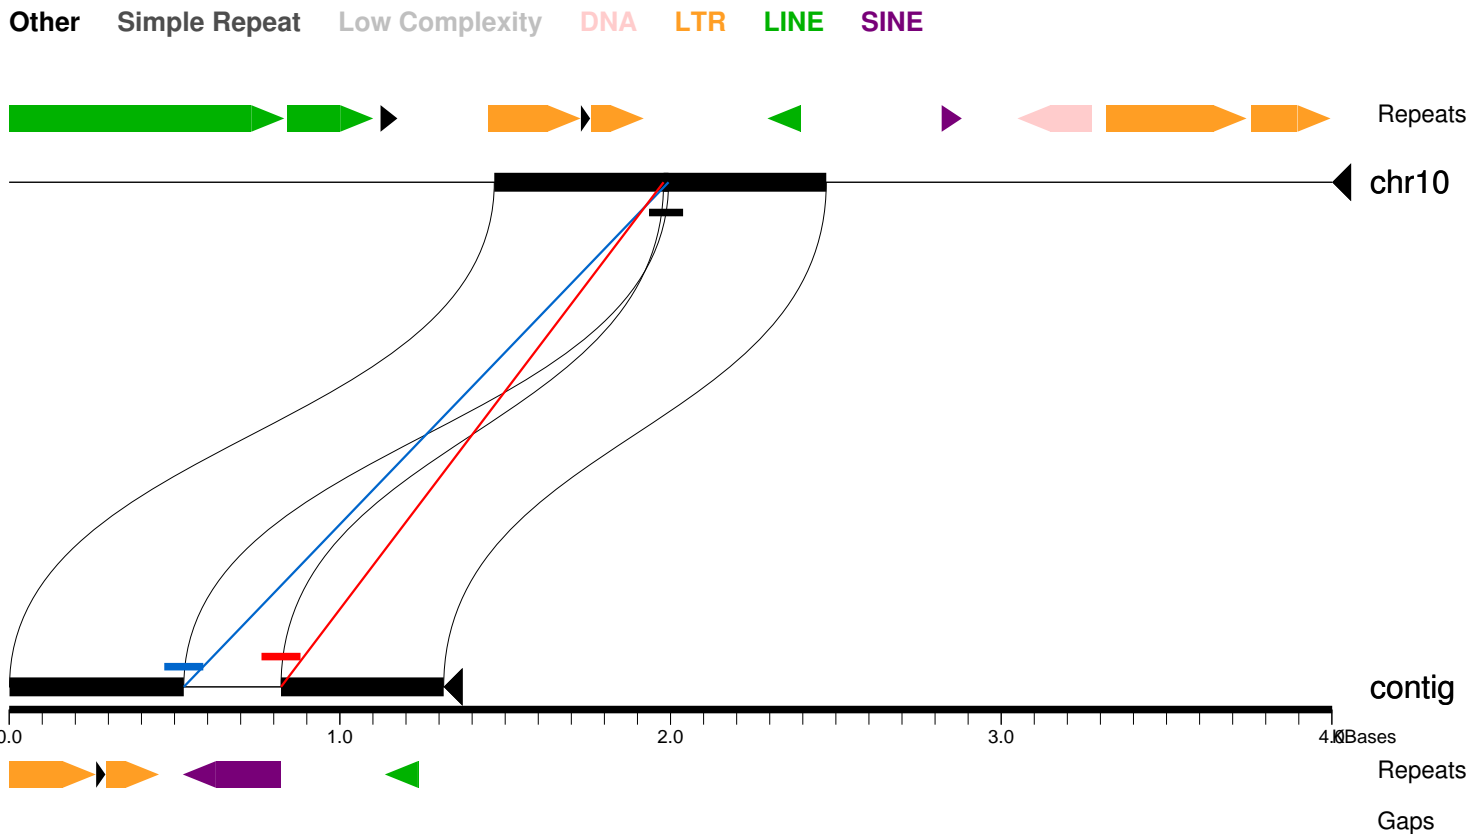

siteID: chr10\_114073872 Scaffitig8 - Breakpoint: chr10:114073854

chr10:114073815-114073907

Overlap Length: 21 INS size: 288 Genotyped: Yes

```
left  T---CTGTGA-----CT--AATCAAGACCTTTTCCA-AGA---AAAC-----AAACAGAAAT
chrom T---CTGTGA-----CT--AATCAAGACCTTTTCCA-AGA---AAAC-----AAACAGAAAT
right TGAGCCGAGATCGCGCCACTGCACTCCAG-CCTGGGCGACAGAGCGAGACTCCGTCTCAAAAAAAAAAAAA
*111*1*1**11111111**11*1**1**1***111*1*1***111*1**111111111***1*1***1
```

```
left  AAAATATTGAGTTTCTGGCCGGGCGCGGTGGCTCACGCCTGTAATCCCAGCACTTTGGGAGGCCGAGGTG
chrom AAAATATTGAGTTTCTGCC---GTGAAGTGACATA-GACTGAAATG---GAGCTT-----CC-----
right AAAATATTGAGTTTCTGCC---GTGAAGTGACATA-GACTGAAATG---GAGCTT-----CC-----
*****2*222*2*22**2*22*2*2***2***2222*22***2222222**222222
```

```
left  GGCGGA
chrom -----
right -----
222222
```

Other Simple Repeat Low Complexity DNA LTR LINE SINE

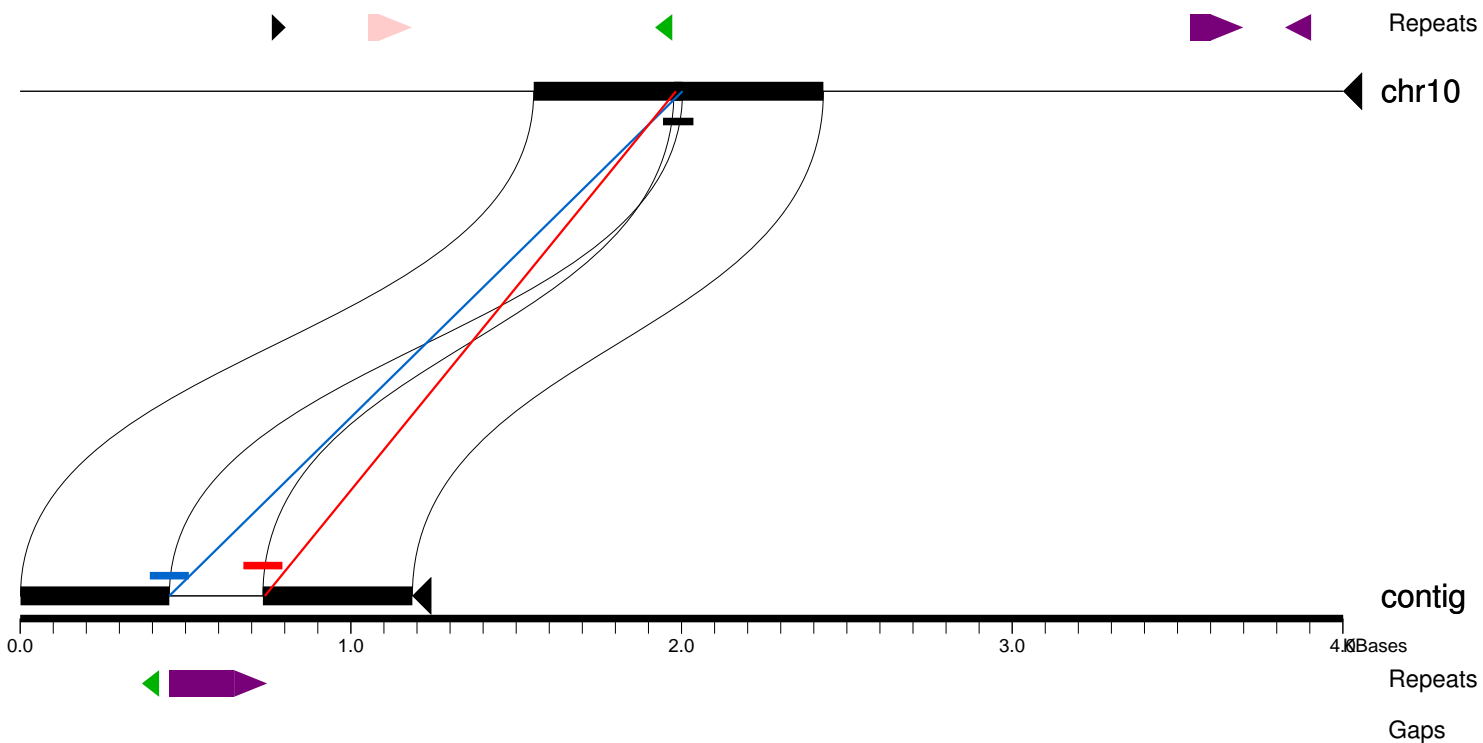



siteID: chr10\_115048229 Scafftig3 - Breakpoint: chr10:115048251

chr10:115048206-115048310

Overlap Length: 15 INS size: 300 Genotyped: Yes

```
left  ----CAAACCTTGTGTGC-----ATAGATAAT-----TTTAAAAACTTTTTCTCTATAAAAAATAATCA
chrom ----CAAACCTTGTGTGC-----ATAGATAAT-----TTTAAAAACTTTTTCTCTATAAAAAATAATCA
right ACTGCACTCCAGCCTGGGCGACAGAGCGAGACTCCGTCTCAAAAAAAAAAAAAAAAAAAAAAATAATCA
      1111**11**1111**1**11111*11**1*1*11111*11*****11111111111*1*****
```

  

```
left  TTGCGGCCGGGCGCGGTGGCTCACGCCTGTAATCCAGCACTTTGGGAG-GCCGAGGCGGGCGG
chrom TTGCT-----CATTGTAGAAAAGTTTAGAA-----AATGTGAAAAAGCATAGAGAAGAAA
right TTGCT-----CATTGTAGAAAAGTTTAGAA-----AATGTGAAAAAGCATAGAGAAGAAA
      ***222222222*22**2222*2*22*22**2222222*2*2**2*22**22**2222*222
```

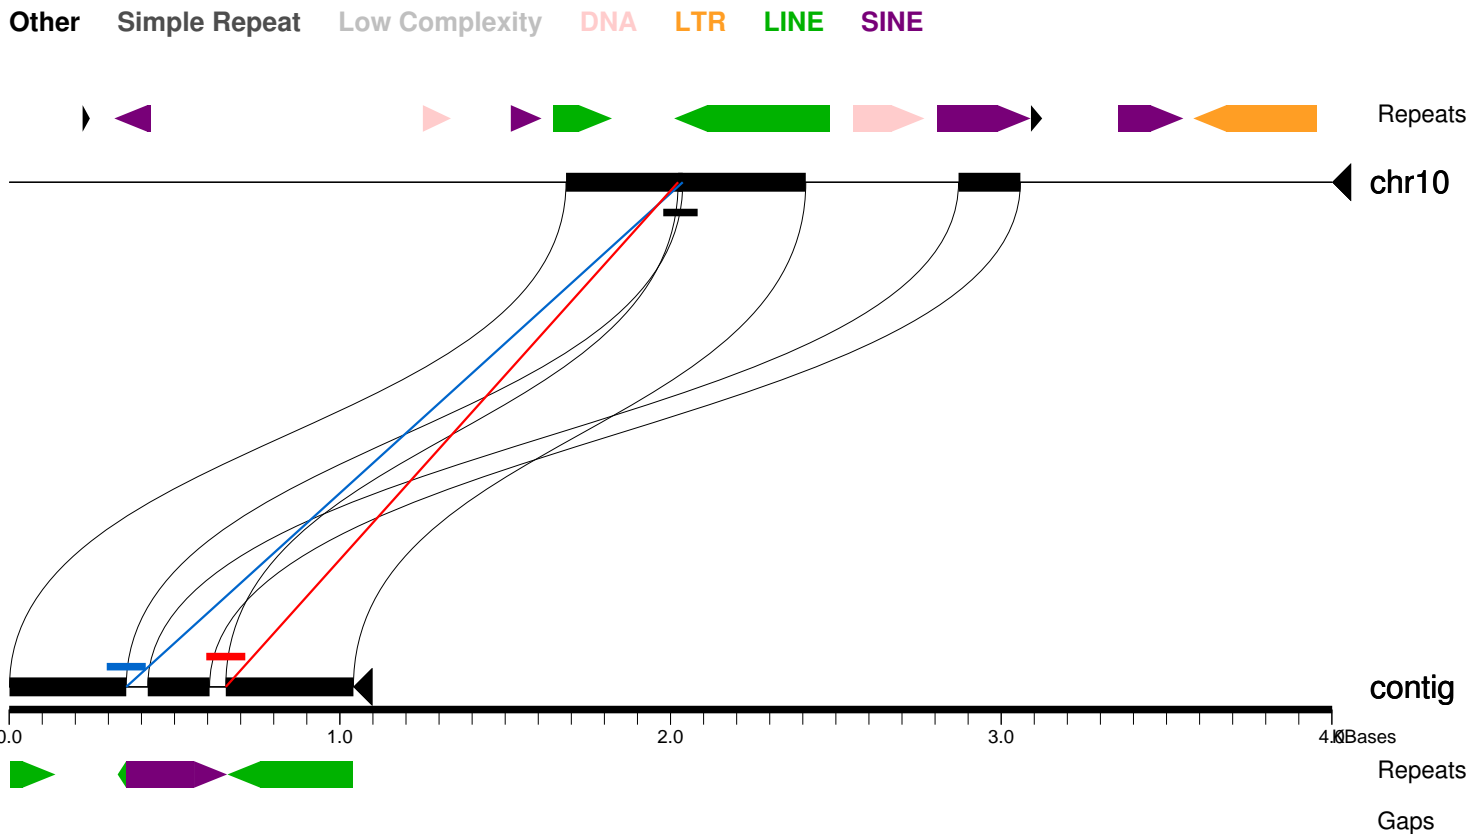



siteID: chr10\_117006243 Scaffitig8 + Breakpoint: chr10:117006328

chr10:117006283-117006387

Overlap Length: 15 INS size: 304 Genotyped: Yes

```
left  TCAAGA---TAG-----AAAATCCAGGAGAAAAGAAAAGGATAATGGATAATGA-----ATCTCTCTC
chrom TCAAGA---TAG-----AAAATCCAGGAGAAAAGAAAAGGATAATGGATAATGA-----ATCTCTCTC
right CCACCCGCCTCGGCCTCCCAAAGTGCTGGG--ATTACAGGCGTGAGCCACCGCGCCCGGCCATCTCTCTC
      1**111111*1*1111111***1*1*1**111*11*1*1*11*1*111*1111*1111111*****

left  ATTCTTTT----TTTTTTTTTTTTTTGAGACGGAGTCTCGCTCTGTCGCCAGGTCGGACTGCGGACTG
chrom ATTCTTAACAAGTCTGTATCCATTTTGAGA--GA-----CTGT-----ATTGAATACAAAAAT
right ATTCTTAACAAGTCTGTATCCATTTTGAGA--GA-----CTGT-----ATTGAATACAAAAAT
      *****222222*2*2*2*222*****22**22222222*****222222222222**2*2*22*222
```

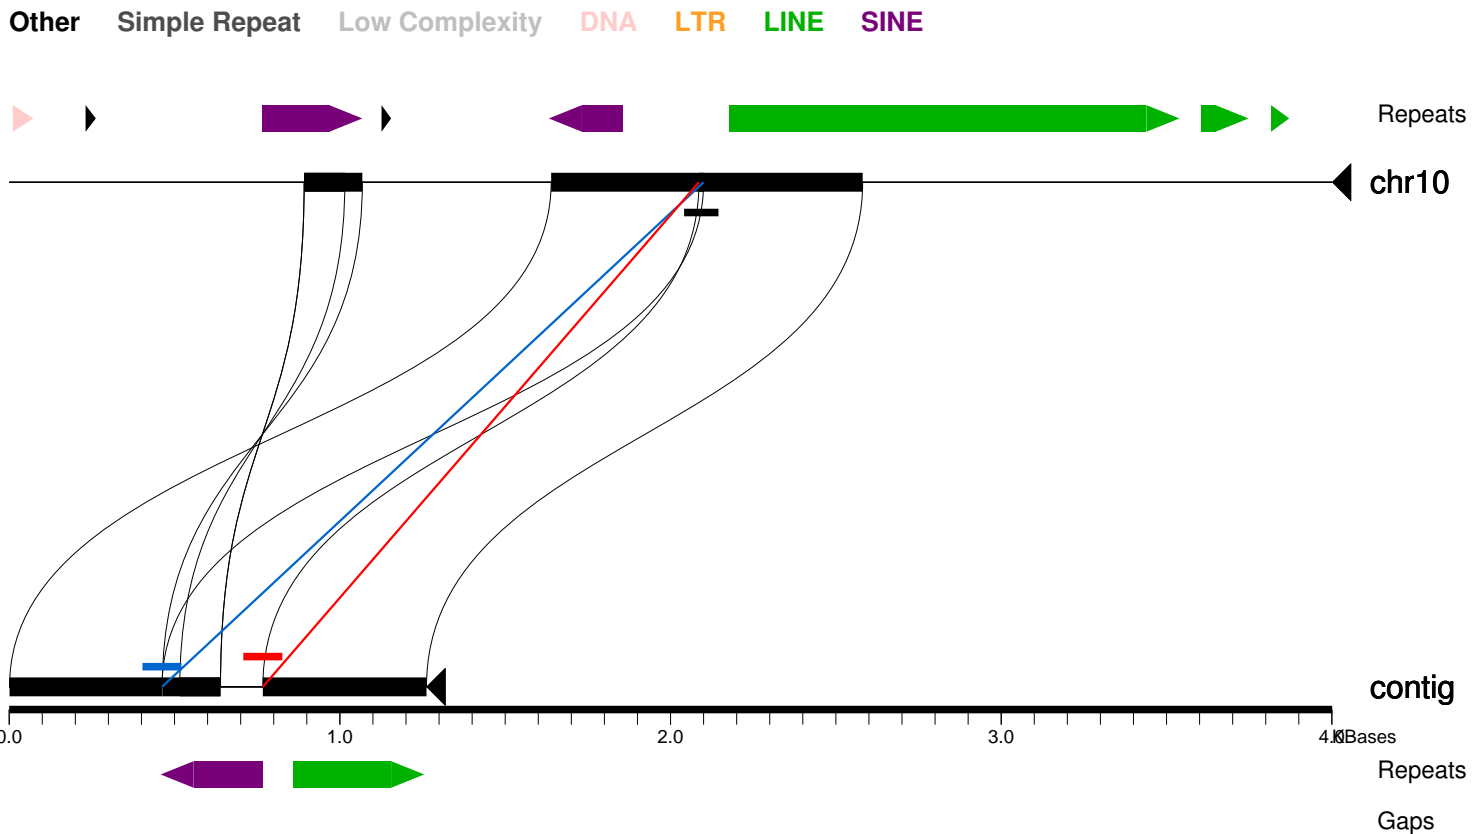

siteID: chr10\_122140620 Scaffitg1 - Breakpoint: chr10:122140590

chr10:122140464-122140750

Overlap Length: 14 INS size: 249 Genotyped: Yes

```
left -----AGTTTCCAGTCAGCAAAAT
chrom GCCCATTTGCAACTAACGAGTT---GCAATTC--GTTACAGGGCAATTTCTAGTTTCCAGTCAGCAAAAT
right AGC----TCCGCCTCCCGGGTTCACGCCATTCTCCTGCCTCAGCC-TCCCAAGT----AGCTAGGACTAC
NN2      2N2NN22NN22N22211122N222211N2NN2N2NN22N 2NN2N***1111**11**1*11*1
```

```
left TAGTTTCTTGCTTTACGTGGGGGAAAAGCAATCTAGATCTTTTGGATAGATAG---TTCGGAAAACATC
chrom TAGTTTCTTGCTTTACGTGGGGGAAAAGCAATCTAGATCTTTTGGATAGATAG---TTCGGAAAACATC
right AGGCGCCCGCCACTACGCCCGGCTATT----TTTTGTAGTTTGTAGTAGAGACGGGGTTTCACCGAACATC
11*1111*1111*11***111**11*1111111*1*1*111***1*1*1***11*111***1111*****
```

```
left AAATTTT
chrom AAAATTTTATAGCAGCAATTGGTCTTGCTGAGAGTAAGAACAATTTCTAGAACAGAAAAGTGACAAAAATAC
right AAAATTTTATAGCAGCAATTGGTCTTGCTGAGAGTAAGAACAATTTCTAGAACAGAAAAGTGACAAAAATAC
***2***2*22222222**22*2**22*22222*22222222*2*2222222222*22222222*22
```

```
left TTTTGAGACGGAGTCTCGCTCTGTGCGCCAGGCTGGAGTGCAGTGGCGGGATCTCGGCTCACTGCAAGCT
chrom TAAAAAGACGATGCA-----CCATGTTGTATAACT-----AATTCAAATCA-TTCTACCT
right TAAAAAGACGATGCA-----CCATGTTGTATAACT-----AATTCAAATCA-TTCTACCT
*2222*****22*22222222222222***2*2**2*222*222222222*22**222***2*2*2*2**
```

```
left CCGCCTCCCGGGTTCACGCCATTCTCCTGCCTCAGCCTCCCAAGTAGCTAGGACT
chrom CAGATT---GGATCTAATAATT-----TAAATATTTCAAATA-----CT
right CAGATT---GGATCTAATAATT-----TAAATATTTCAAATA-----C-
*2*22*2222**2**22222**22222222*2*222*22***2**222222*1
```

Other Simple Repeat Low Complexity DNA LTR LINE SINE

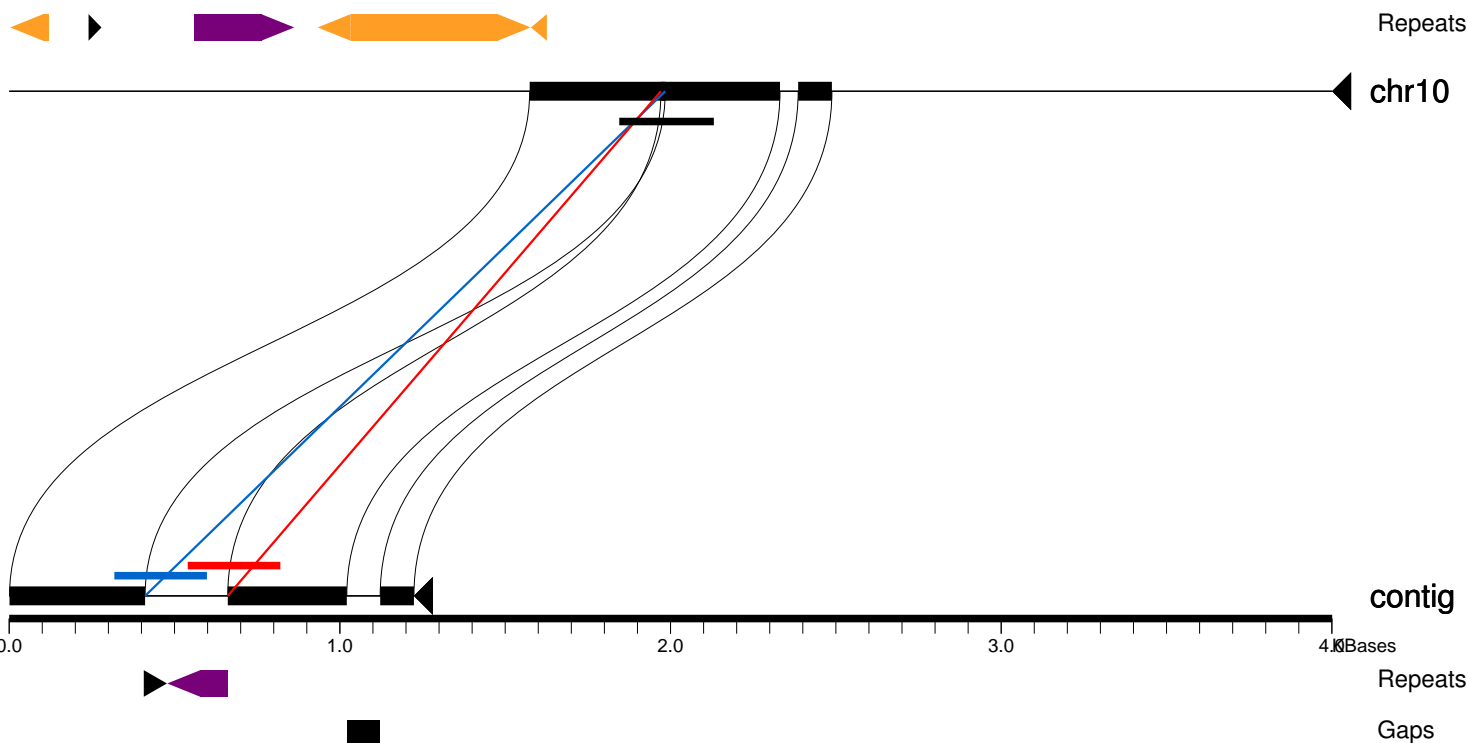

siteID: chr10\_124736002 Scaffitg10 + Breakpoint: chr10:124735991

chr10:124735831-124736164

Overlap Length: 14 INS size: 302 Genotyped: Yes

```
left      T-----ATGTGCAAGATGTCATTTCTTCCCAACTTGATCTATAGATTCAACACAGTCTC
chrom     TCATGAATAGAAAATAATTTGTCAAGATGTCATTTCTTCCCAACTTGATCTATAGATTCAACACAGTCTC
right     GCAGGA---GAATGGCGTGAACCCGGGAGGCGGAGCTTGCAG---TGAGCCG-AGATCGCGC-CA--CTA
122N22    222NNNNN11111*11*11*1*1111***1*11111***1*111***1111*1**11**1
```

```
left      AACCCAGCAAGCTGTTTTGTGGATATCAACAAAGTGATTCTAAAGTTTATGTGGCAAGGCAAAGGATCT
chrom     AACCCAGCAAGCTGTTTTGTGGATATCAACAAAGTGATTCTAAAGTTTATGTGGCAAGGCAAAGGATCT
right     CACTCCAGC---CTG-----GG----CGACAGAGCGAGACTCC-----GTCTCAAAAAAAAAA---
1**1*****111***1111111**1111*1***1**1**11**111111111**11***111***11*111
```

```
left      AGGCTAGCCAGCACAAATATTAAGAAGGAGCAAAGGGGCCGGCG--CGGTGGCTCAC-GC-----C
chrom     AGGCTAGCCAGCACAAATATTAAGAAGGAGCAAAGGGGCCGGCG--CGGTGGCTCAC-GC-----C
right     -----AAAAAAAAAAGGAGCAAACTAGAAGACTGACAGTAGCCAAGACTTAC
1111111111111*1**1*11**1*****222222*2*222*2**2**22*2**2222222*
```

```
left      TGTAATCCAGCACTTT---GGGAGCCGAGGCGGGCGGATCACGAGTCTCAGGAGATCGA-GACCATCCT
chrom     TATAAAGCTATAATAATAAAGATAGTGTATATTGGCAAAAAGAAATAGACAAAATAGATCAATGAACAGAAT
right     TATAAAGCTATAATAATAAAGATAGTGTATATTGGCAAAAAGAAATAGACAAAATAGATCAATGAACAGAAT
*2***22*2*22*222*222*22**2222*2222***22*22*22**22*22*****2*2**2**222*
```

```
left      GGCTAACACGGTGAACCCCGTC-----TCT---ACTAAA-----
chrom     AGAGAGCCACATAAATACAGTCAACTGATCTTTGACAAAAGGAGCAAAGGCAAT
right     AGAGAGCCACATAAATACAGTCAACTGATCTTTGACAAAAGGAGCA-----
2*22*2*2*2222***22*2***222222***222*2**222222
```

Other Simple Repeat Low Complexity DNA LTR LINE SINE

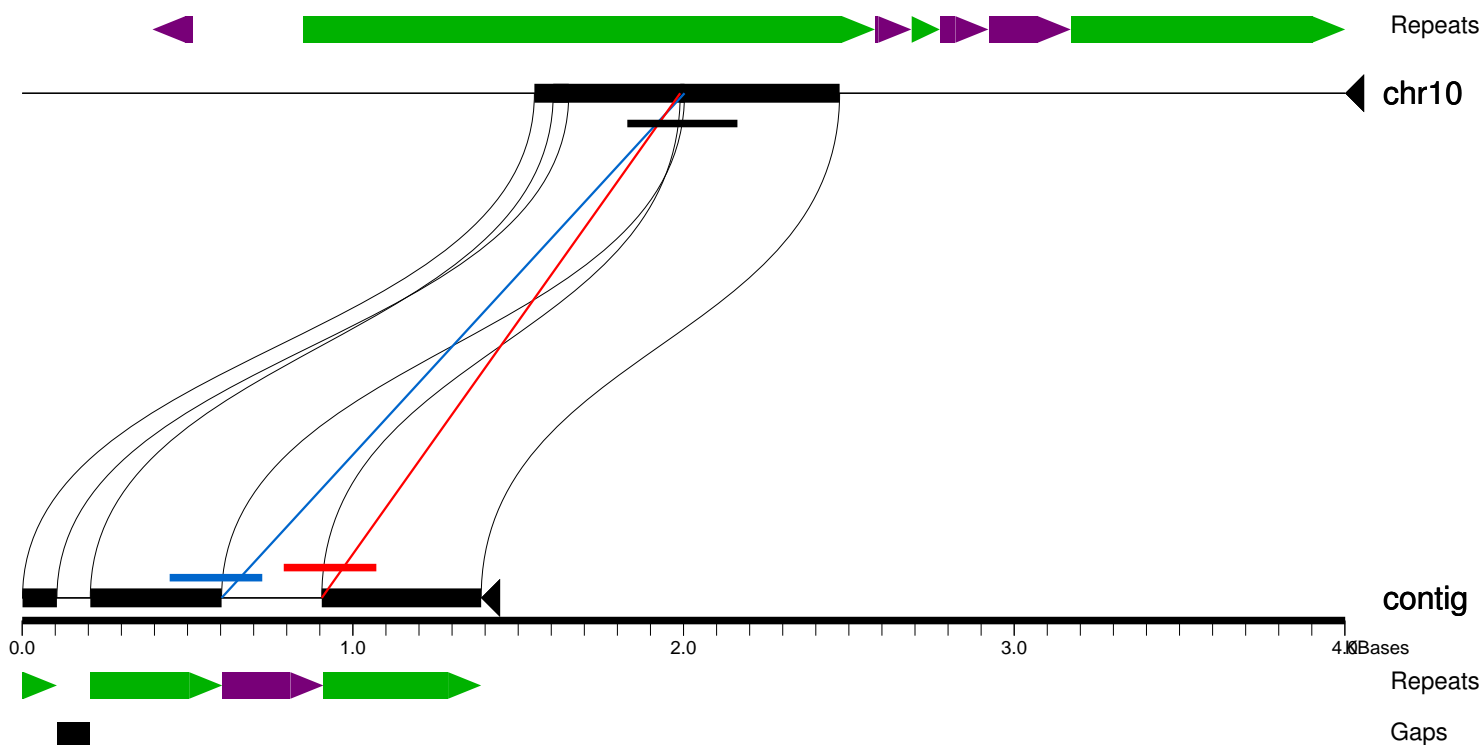



siteID: chr10\_129190289 Scaffitg1 - Breakpoint: chr10:129190293

chr10:129190133-129190466

Overlap Length: 14 INS size: 299 Genotyped: Yes

```
left -----GGCCTCTGGATCACAGCGTGAAGTCTTCAAAGATGCCCAAACCTCAGGGATTCTCCC-A
chrom CTAATAAAGTGGCTCTGGATCACAGCGTGAAGTCTTCAAAGATGCCCAAACCTCAGGGATTCTCCC-A
right TTTA----GTAGAGACGGGGTTTCACCGT-----TTTA-----GCC-----GGGATGGTCTCGA
N2N2 221*111*1**1*11**1***1111111**1*11111***111111111*****11**1*1*
```

```
left TCTCCTCTGCAGGCGATCCAGGCTCTCACCTGGCATGAGGCCCTTAGAGTAGGAATCGAGCCTCCAGA
chrom TCTCCTCTGCAGGCGATCCAGGCTCTCACCTGGCATGAGGCCCTTAGAGTAGGAATCGAGCCTCCAGA
right TCTCCTGACCTCGTGATCCGCCCGCCTC----GGCCT-----CCCAAAGTGTGGGAT-----TACAGG
*****111*11*1*****111*11**1111***1*11111***11**1*11**1**111111*1**1
```

```
left TGTACCCTCTCATCACCCACAGCATCTGGCCTTCCTTTTTTTTTTTTTTTTTTTG--AGAC---GGAGTCT
chrom TGTACCCTCTCATCACCCACAGCATCTGGCCTTCCTGAACATGCCCTCTGTTCCTCCCAAGCCCTTGCACCTT
right CGTGAGCCACCGCGCCCGGCCGCATCTGGCCTTCCTGAACATGCCCTCTGTTCCTCCCAAGCCCTTGCACCTT
1**111*111*1111**11*1**********22222*2222*2*2**22222**2*222*2*222*
```

```
left CGCTCTGTC-GCCAGGC-TGGAG-----TGCAGTGGCGGGATCTCGGCTCAC-TGCAAGC
chrom CCCATGGTCTGCCCGGCGTGGACCGGCTGCTTCTTGCTGCTGTCTCGTG-TGACGGCTGCCATGACAGC
right CCCATGGTCTGCCCGGCGTGGACCGGCTGCTTCTTGCTGCTGTCTCGTG-TGACGGCTGCCATGACAGC
*2*222***2****2***2****222222222222222***2**22**2*2*22*****22*2**22***
```

```
left TCC-----GCCTCCCGG-----TTCACGCCATTC-----TCTGCCTC-----
chrom TGCCTTCTCTGCCTTCTGGGCATATTTCACTGCTCTCAAACCTTTCGTGGCTTTTGGGA
right TGCCTTCTCTGCCTTCTGGGCATATTTCACTGCTCTCAAACCTT-----
*2*22222***2*2***22222*****22*22**22222211N11N11N
```

Other Simple Repeat Low Complexity DNA LTR LINE SINE

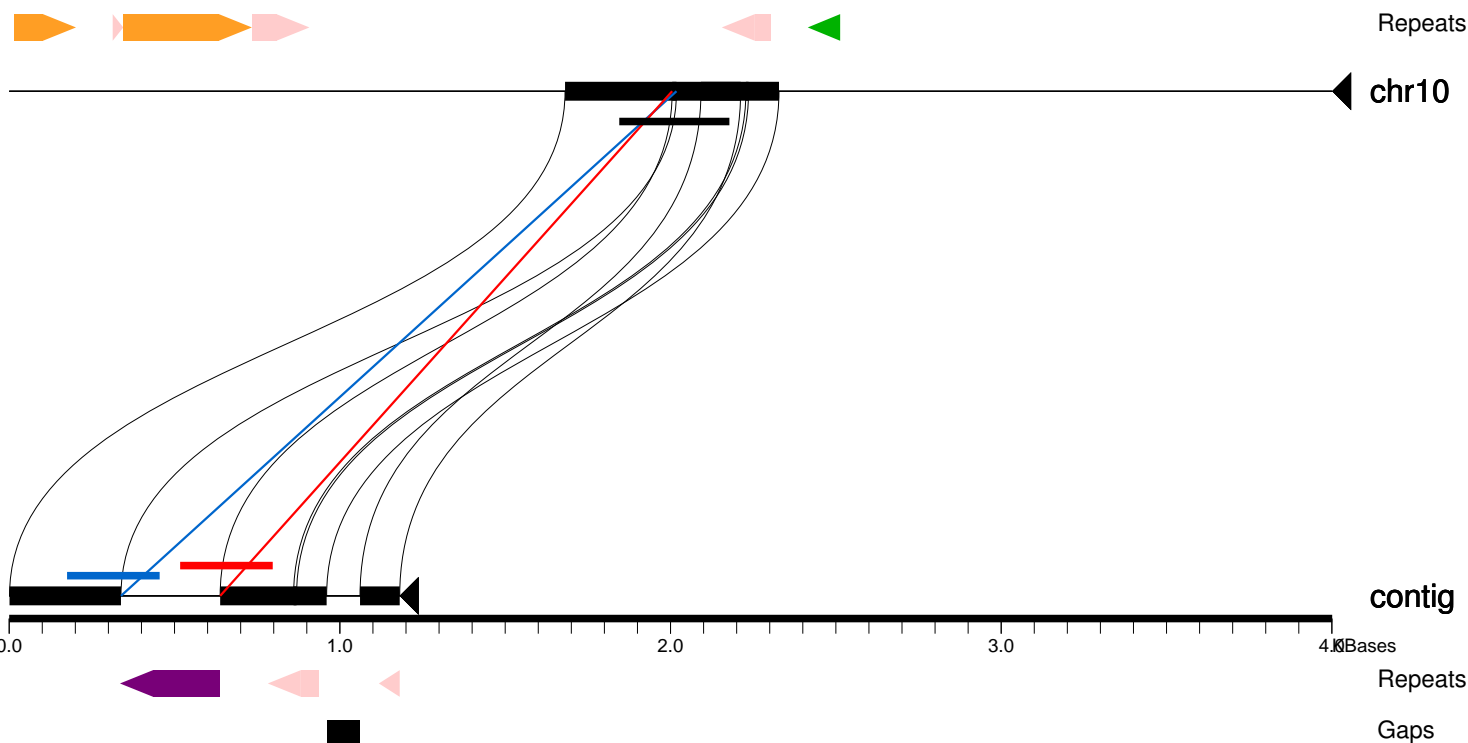





siteID: chr10\_129373584 Scaffitig7 + Breakpoint: chr10:129373582

chr10:129373536-129373641

Overlap Length: 14 INS size: 295 Genotyped: Yes

```
left  -----CATTTTCTTTCTATTCTGC-----ATTGCAG---TGAACCCCTATTG-GAATCACTGGGAATAAC
chrom -----CATTTTCTTTCTATTCTGC-----ATTGCAG---TGAACCCCTATTG-GAATCACTGGGAATAAC
right CCGCCCGCCTCGGCCTCCCAAAGTGCTGGGATTACAGGCGTGAGCC--ACCGCGCCCGGCCGGGAATAAC
      11111111*1*111*1*1*1*111***1111***1***111***1**11*11*1*111111*1*****

left  CTTTTFTTTTTTTTTTTTTTTGGAGACGGAGTCTCGCTCTGTCTGCCAGGCTGGAGTGCAGTGGCGG
chrom CTTTTCCTTGACT-----AAGCGGGGTGTA--TGGGGGACCCAG-----AGAAGATAAGAGC
right CTTTTCCTTGACT-----AAGCGGGGTGTA--TGGGGGACCCAG-----AGAAGATAAGAGC
      ***222**222*222222*22***2**2*222*22*222*****22222**222*222*2*2
```

Other Simple Repeat Low Complexity DNA LTR LINE SINE

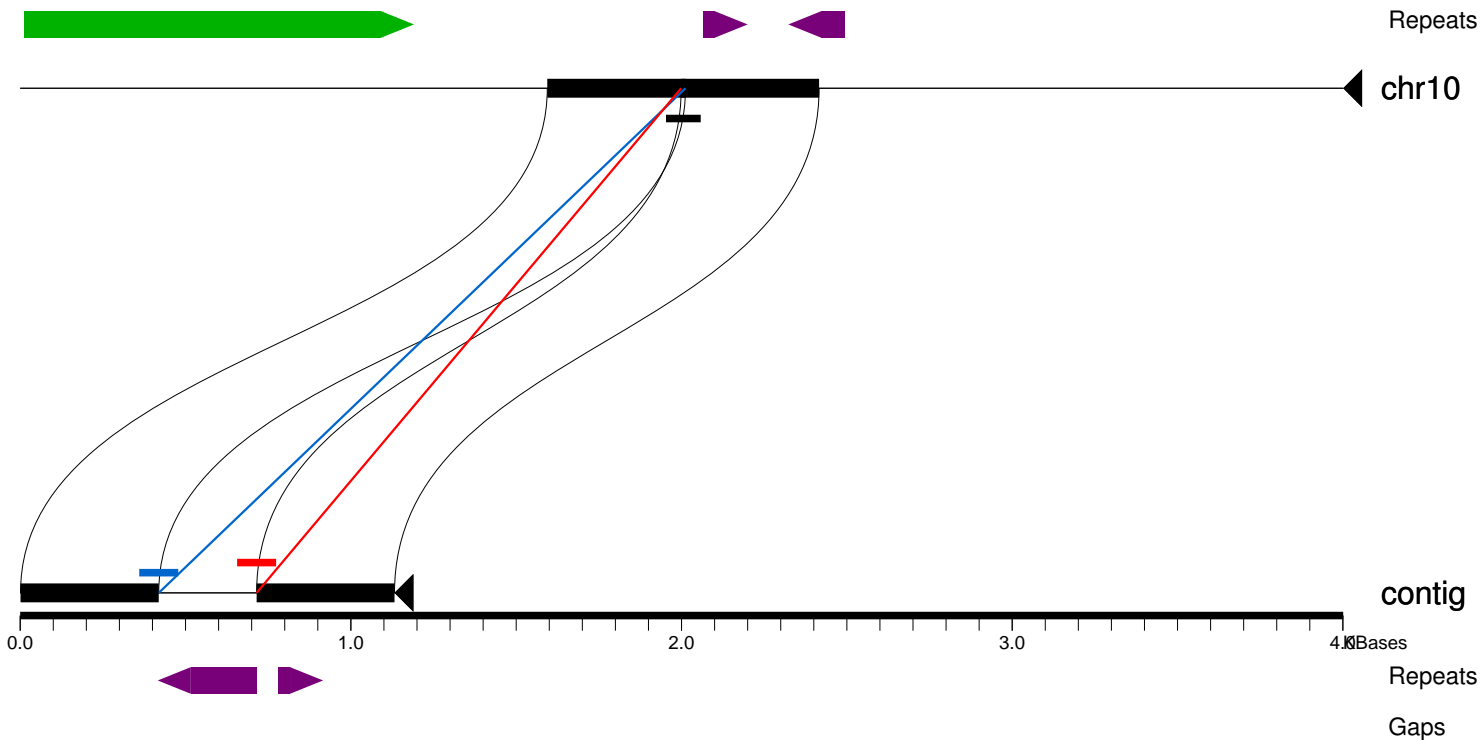

**siteID: chr10\_129553754 Scaffold1 - Breakpoint: chr10:129553743**  
**chr10:129553701-129553802**  
**Overlap Length: 18 INS size: 158 Genotyped: Yes**

```
left   CAAAACAGTGAGTCTGT-----AAGCATTTTGTACCCCTGGCCTTCAAGAACCATGT
chrom  CAAAACAGTGAGTCTGT-----AAGCATTTTGTACCCCTGGCCTTCAAGAACCATGT
right  ACAGAGCGAGACTCCGTCTCAAAAAAAAAAAAAAAAAAAAAAAAAAAAAAAAAAAGAACCATGT
      11*1*11*1**1**1**111111111111111111**11*1111*111*111111111111*****
```

```
left   ATTTTTTACTCGGGAGGCTGAGGCAGGAGAATGGCGTGAACCCGGGAAGCGGAGCTTGCAGTGAG
chrom  ATTTTTTAAAT-----ATGCTT-GGTAGGAG-----CTACACACTTTGTAACAAATAGTTC-----
right  ATTTTTTAAAT-----ATGCTT-GGCAGGAG-----CTACACACTTTGTAACAAATAGTTC-----
      *****2*222222*2***22*N*****22222*222*22*222*2*2*22*222*2*222222
```

Other    Simple Repeat    Low Complexity    DNA    LTR    LINE    SINE

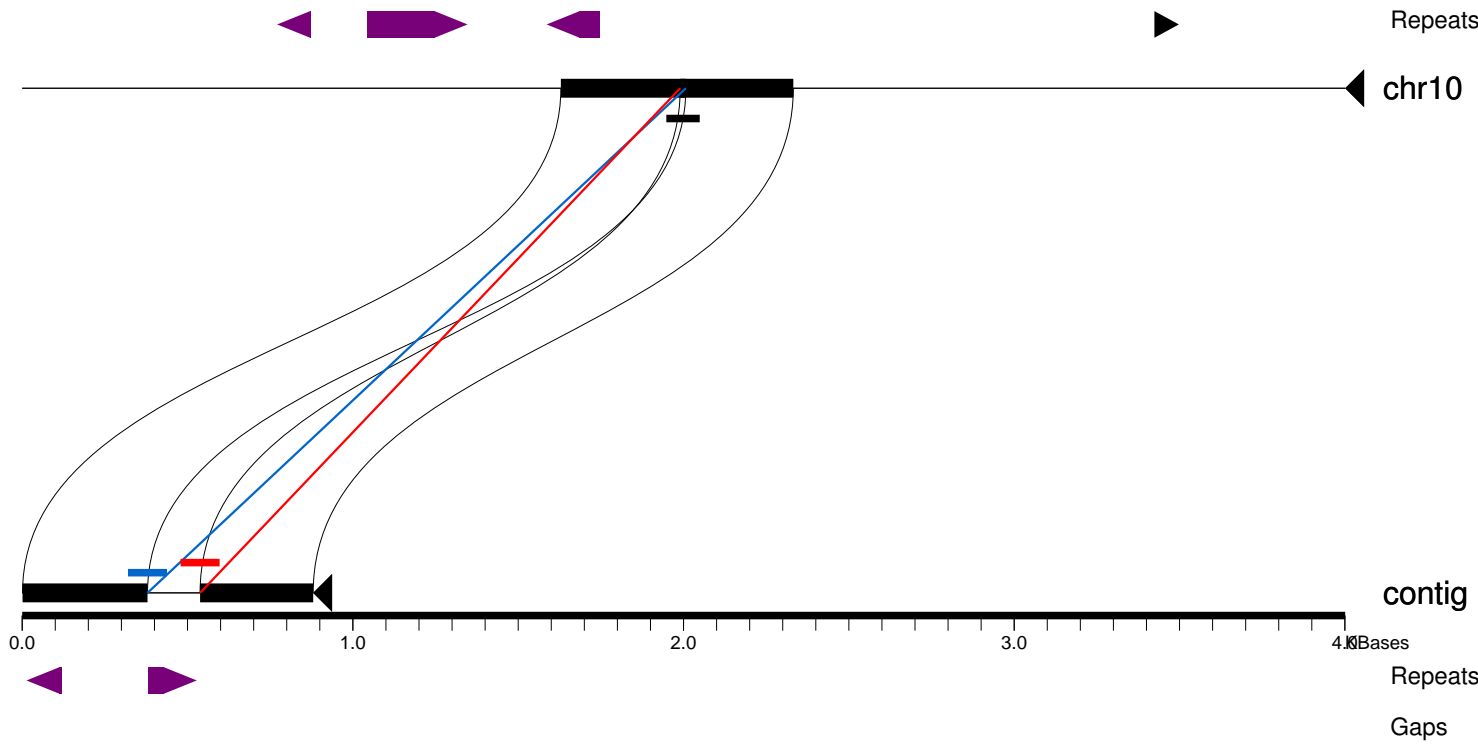

siteID: chr10\_132145567 Scaffoldig2 + Breakpoint: chr10:132145572  
 chr10:132145527-132145631  
 Overlap Length: 15 INS size: 306 Genotyped: Yes

```

left  GTAAA--GCTAGACCCCTTTTATTCATTTTGAGTAGAAGTAGAATCTT-----CTGTTAAAAAA
chrom  GTAAA--GCTAGGCCCTTTTATTCATTTTGAGTAGAAGTAGAATCTT-----CTGTTAAAGAA
right CCACCCGCCTCGGCCCTCCCAAAGTGCTGGGATTACAGGCGTGAGCCACCGCGCCCGGCCCTGTTAAAGAA
      11*111111**1*2**111111*111111*11**1**1*1*11111*1*1111111111111111111**2**
left  TTTTTFTTTTTTTTTTTTTTTTTTTTTGAGACGGAGTCTCGCTCTGTCGCCAGGTCGGACTGCGGAC
chrom  TTTTGCATCATGTATCACAGGTGATA-GTTATCTGAATATTTTGTCTTT-----C
right  TTTTGCATCATGTATCACAGGTGATA-GTTATCTGAATATTTTGTCTTT-----C
      ***222*22*2*2*222222***2*2*222***222*2*2*2*2*222222222222222222*

```

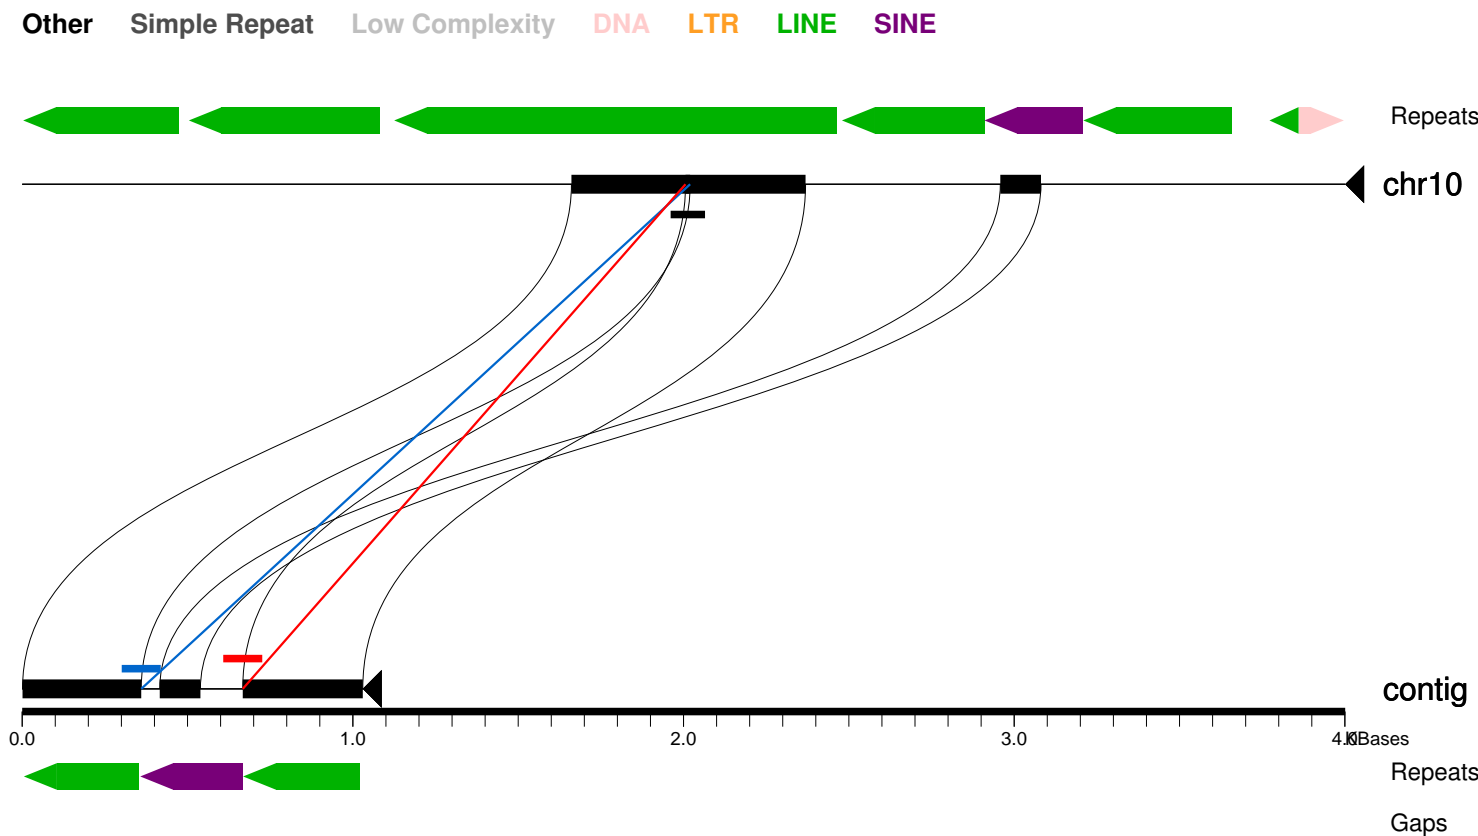

siteID: chr10\_14396676 Scaffitg1 - Breakpoint: chr10:14396684

chr10:14396524-14396858

Overlap Length: 15 INS size: 305 Genotyped: Yes

left -----TTATTCAGGGGAGGTAACAGCTTCATCTTATTGAAGAGGACTTCATTGCCTCTTGT  
chrom CTGACTGGGTTGGCTTATTCAGGGGAGGTAACAGCTTCATCTTATTGAAGAGGACTTCATTGCCTCTTGT  
right GAGAATGGCGTGAA-----CCCGGGAGGCGG--AGCTTGCAGTGAGCCGAGATCGGCCACTGCA-----  
NN22N222NN22NN11111\*11\*\*\*\*\*1111\*\*\*\*\*1111\*1\*1111\*\*\*111\*11\*1\*\*\*1111111

left TGGTATCCCTAACCTCCCCACCATCCCCCAGCCCCCTACTTTACAAAAAGTCCCTCTGGGAGTTTAACT  
chrom TGGTATCCCTAACCTCCCCACCATCCCCCAGCCCCCTACTTTACAAAAAGTCCCTCTGGGAGTTTAACT  
right -----CTCCAGCCTGGGCGACAGAGCG--AGACTCCGTCTCAAAAAAAA-----AAAAAAAAA  
111111\*1\*1\*1\*\*\*111\*11\*\*111\*111\*\*1\*1\*\*11\*\*11\*1\*\*\*\*\*11111111111\*1111\*\*11

left TGGTCATACTCCCTTGCTACAAAACTCCAGTGCAG--GCCGGGCGGGTGGCTC-----  
chrom TGGTCATACTCCCTTGCTACAAAACTCCAGTGCAGTAGCCTCCCTTGAATAGTCTTCCCTTTCCATATTGA  
right AAAAAAA-----AAAACCTCCAGTGCAGTAGCCTCCCTTGAATAGTCTTCCCTTTCCATATTGA  
11111\*1\*1111111111111\*\*\*\*\*\*22\*\*\*222\*22\*22222\*\*2222222222222222

left ACGCCTGTAATCCCAG-----CACTTTGGGAGGC--CGAGGCGGGCGGA-TCAG---AGGTC  
chrom ACAGGTGTCATGAAAAAGTTATTATTTAACAGTTACGGCACCTGCGATTTGGACAGAATCAGATTCATCGC  
right ACAGGTGTCATGAAAAAGTTATTATTTAACAGTTACGGCACCTGCGATTTGGACAGAATCAGATTCATCGC  
\*\*222\*\*\*2\*\*222\*222222222222\*\*2\*\*22\*\*222\*22\*\*\*222\*\*2\*2\*\*2\*\*\*22222\*222\*

left AGGAGATCGAGACCA---TCCCAG--CTAAAACGGTGAAAACCCGTCTCTACTAAA  
chrom CGGATTCCCAGACCCCTCTCTCAGAACTCCAAATATGCACCTTTGAAGCCTTTGT-  
right CGGATTCCCAGACCCCTCTCTCAGAACTCCAAATATGCACCTTT-----  
2\*\*\*222\*2\*\*\*\*\*2222\*\*2\*2\*22\*\*22\*\*222\*\*2\*2\*2221NNN1NNN1NN2

Other Simple Repeat Low Complexity DNA LTR LINE SINE

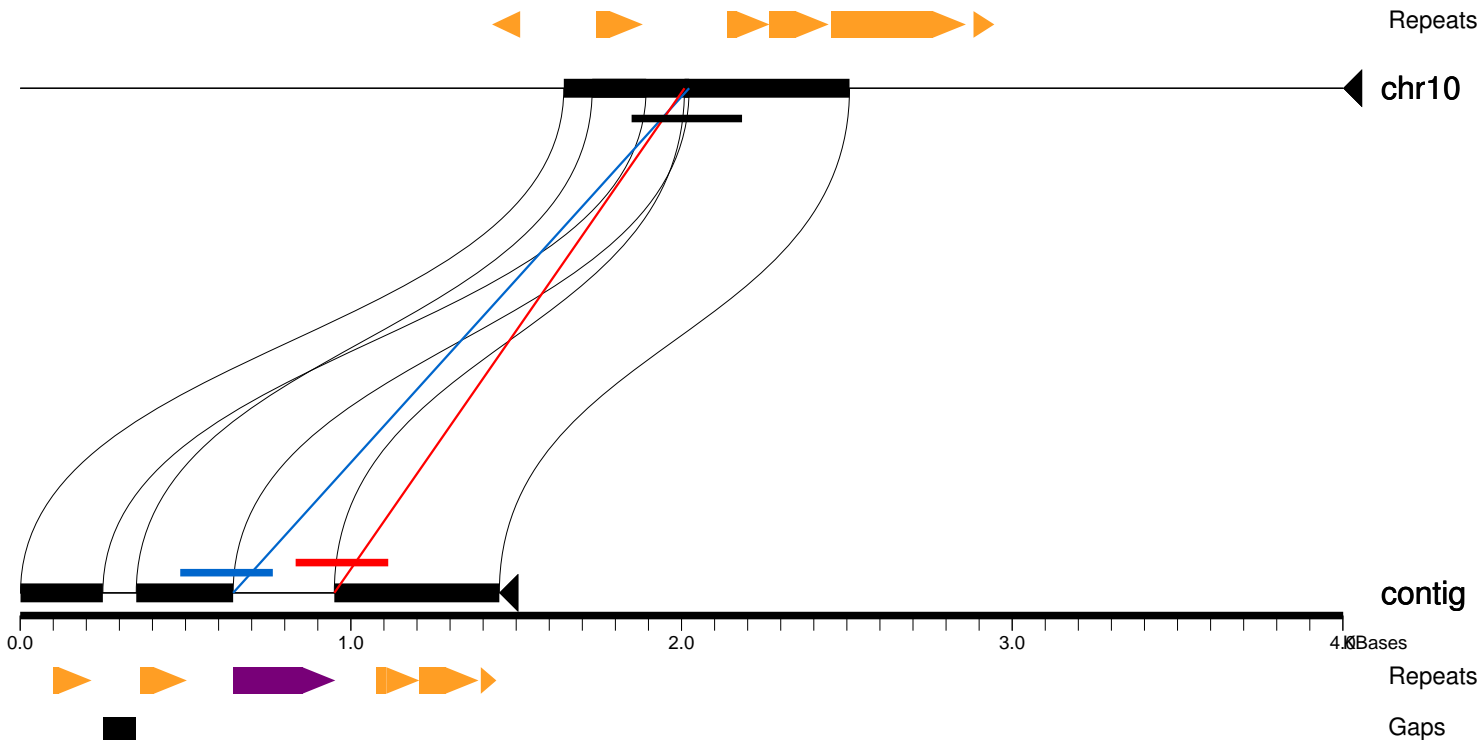

siteID: chr10\_14484811 Scafftig9 - Breakpoint: chr10:14484814

chr10:14484755-14484883

Overlap Length: -9 INS size: 336 Genotyped: Yes

```

left      TAAAAATATATCTACTAAAAATCTACAGCTTACATTATAACTCACTATAAAAAGAAGGAATGGGCCGGGCGA
chrom     TAAAAATATATCTACTAAAAATCTACAGCTTACATTATAACTCACTATAAAAAGAAGGAATGTGTTTT---A
right    G-----TCTCAAAAAAAAAAAAAAAAAAAAAAAAAAGGAATGTGTTTTAGAAAATAACATGTCTAT-----
         11111111*1*1*11*****111*1*1111*1*11*11*1*111*1*1*1*1*1111**212N2N2221

left      GGTGGCTCACGCCTGTAATC-CCAGCACTTTGGGA----GGCCGAGGCGGGCGG-----
chrom     GAAATAACATGTCTATACTTACCACCTCTATTCAATATTGTACCTAGCCAGTGTAAACAAAAC
right    --AATAACATGTCTATACTTACCACCTCTATTCAATATTGTACCTAGCCAGTGTAAACAAAAC
         1N22222**2*2**2**2*22**2*2**2*222*2222*22*222**22*2*222222222

```

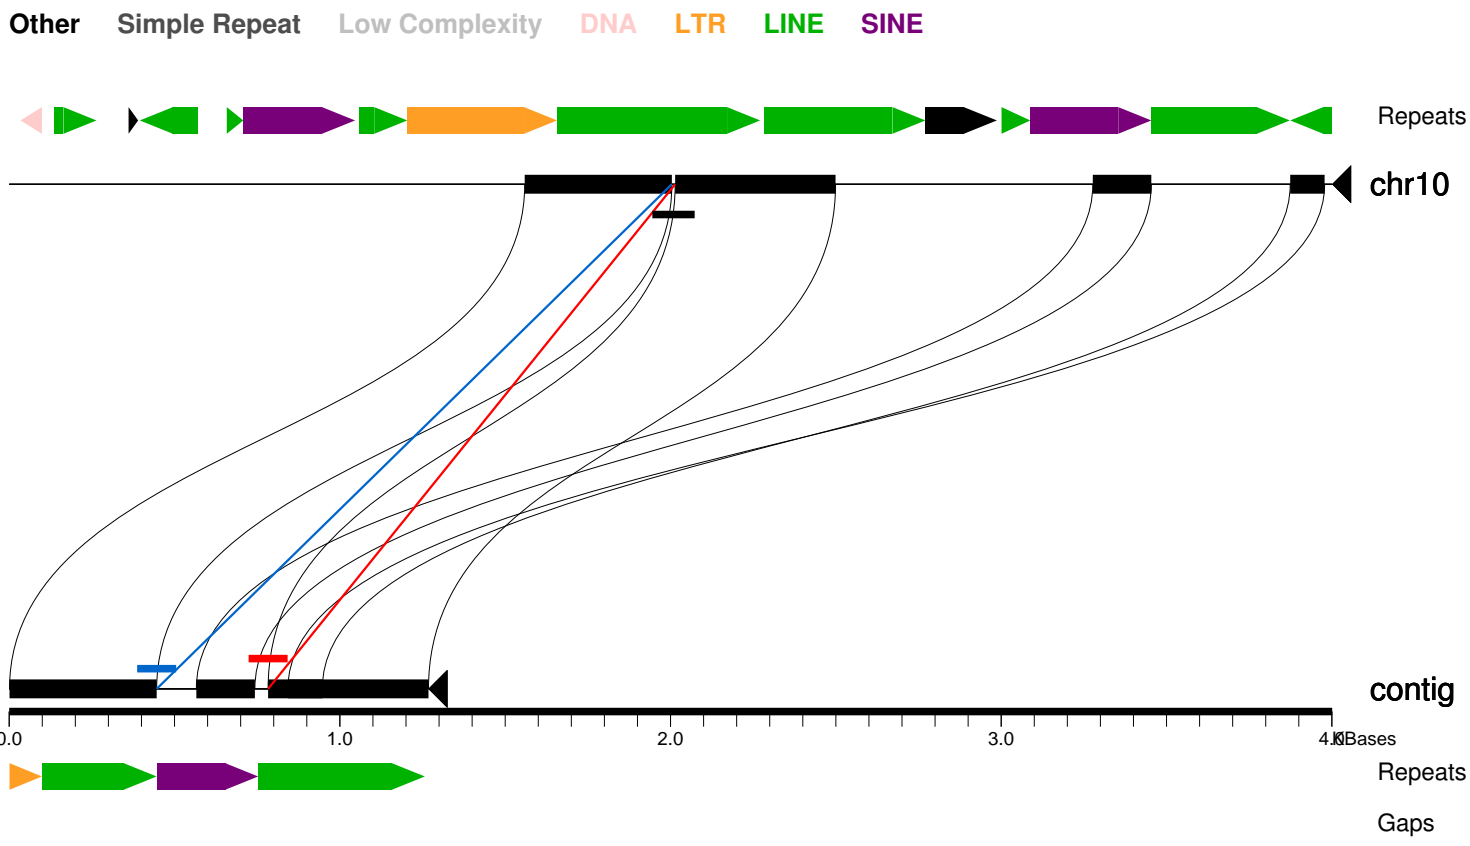



siteID: chr10\_16000975 Scafftig4 - Breakpoint: chr10:16000950

chr10:16000908-16001009

Overlap Length: 18 INS size: 309 Genotyped: Yes

```

left   TCA-----CAAAATCAAGTTGCTT-GCTTCTTTGTATCATGCTTTTCT-----AGAAAAGTGAA
chrom  TCA-----CAAAATCAAGTTGCTT-GCTTCTTTGTATCATGCTTTTCT-----AGAAAAGTGAA
right  CCATCCTGGGCGACAGAGCGAGACTCCGCCTCAGAAAAAAAAAAAAAAAAAAAAAAAAAAAAAAAAAAGAAAAGTGAA
      1**11111111*1*1*1111*111**11**1**11111*11*1111111111111111111******

```

```

left   ACTTTGAGGCCGGGGCGCGGTGGCTCACGCCTGTAATCCCAGCACTTTGGGAGGCCGAGGCGGGCGG
chrom  ACTTTGAAG-----GAAATACCCAAGAAA--CAAGAATATT----GCCTCAATATTGTTT
right  ACTTTGGAG-----GAAATACCCAAGAAA--CAAGAATATT----GCCTCAATATTGTTT
      *****12*222222222222*2222**2*22*2**22*2**2*22**2222*2*22*22222*222

```

Other   Simple Repeat   Low Complexity   DNA   LTR   LINE   SINE

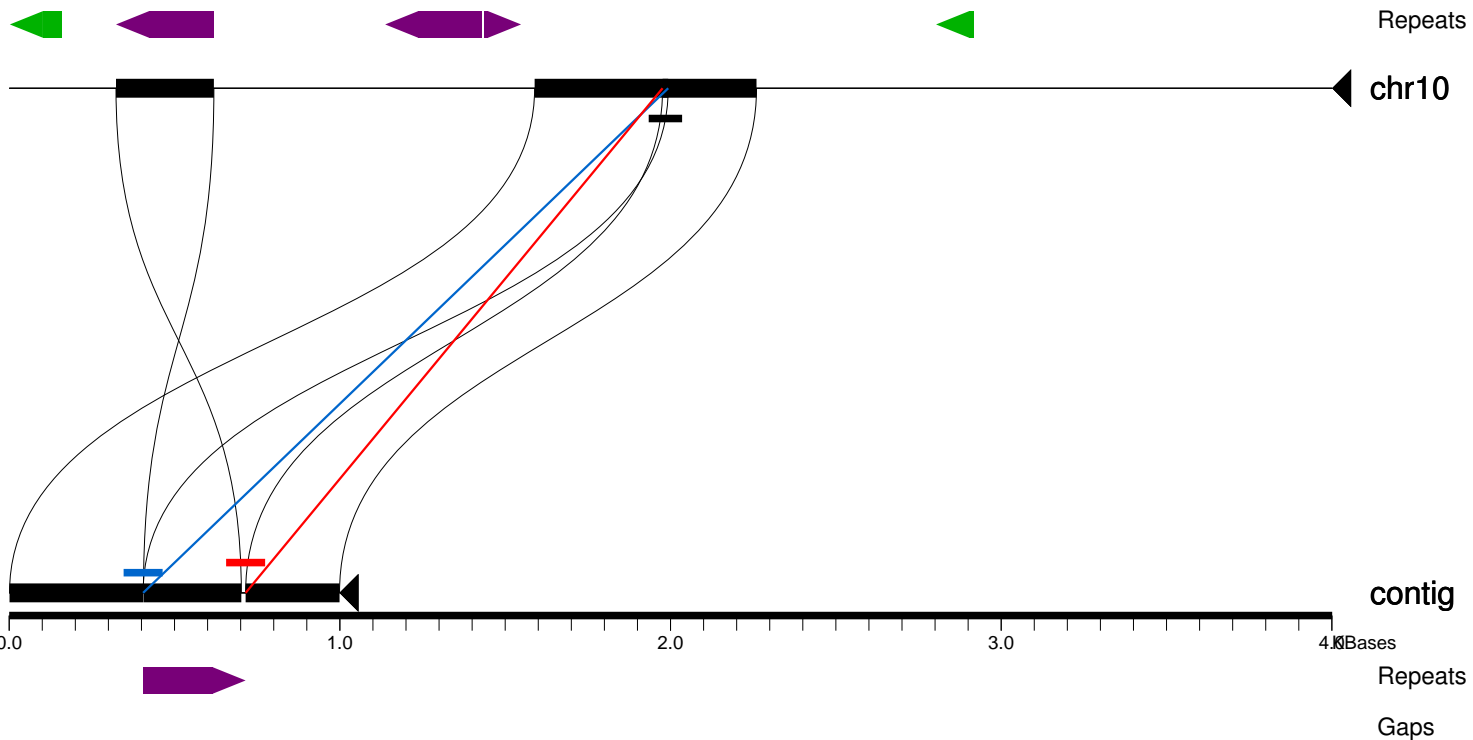





siteID: chr10\_19550734 Scafftig4 - Breakpoint: chr10:19550721

chr10:19550674-19550780

Overlap Length: 13 INS size: 304 Genotyped: Yes

```
left  TTTACT-----TTTCTTTGGTACTTCAAAAATCAACCTTTTCCCCTCGTGCCT----GCCTTGTAAAT
chrom TTTACT-----TTTCTTTGGTACTTCAAAAATCAACCTTTTCCCCTCGTGCCT----GCCTTGTAAAT
right CCGCCCGCCTCGGCCTCCCAAAGTGCTGGGATTACAGGCGTGAGCCACCGCGCCCGGCCGCCTTGTAAAT
      1111*111111111111*1*1111**1**111*111**11*1*111**11**1***11111*****
```

  

```
left  TTTTTTTTTTTTTTTTTTTTTTTTTTTTTGAGACGGAGTCTCGCTCTGTGCGCCAGGCTGGAGTG
chrom TTAATGAAAGCAGTGTTC---CAGCAACCTGGGCTTGAATTTCCAC-----AGTC
right TTAATGAAAGCAGTGTTC---CAGCAACCTGGGCTTGAATTTCCAC-----AGTC
      **22*22222222*2**2*222222*22**222*2**2*222*22*2*22222222***2
```

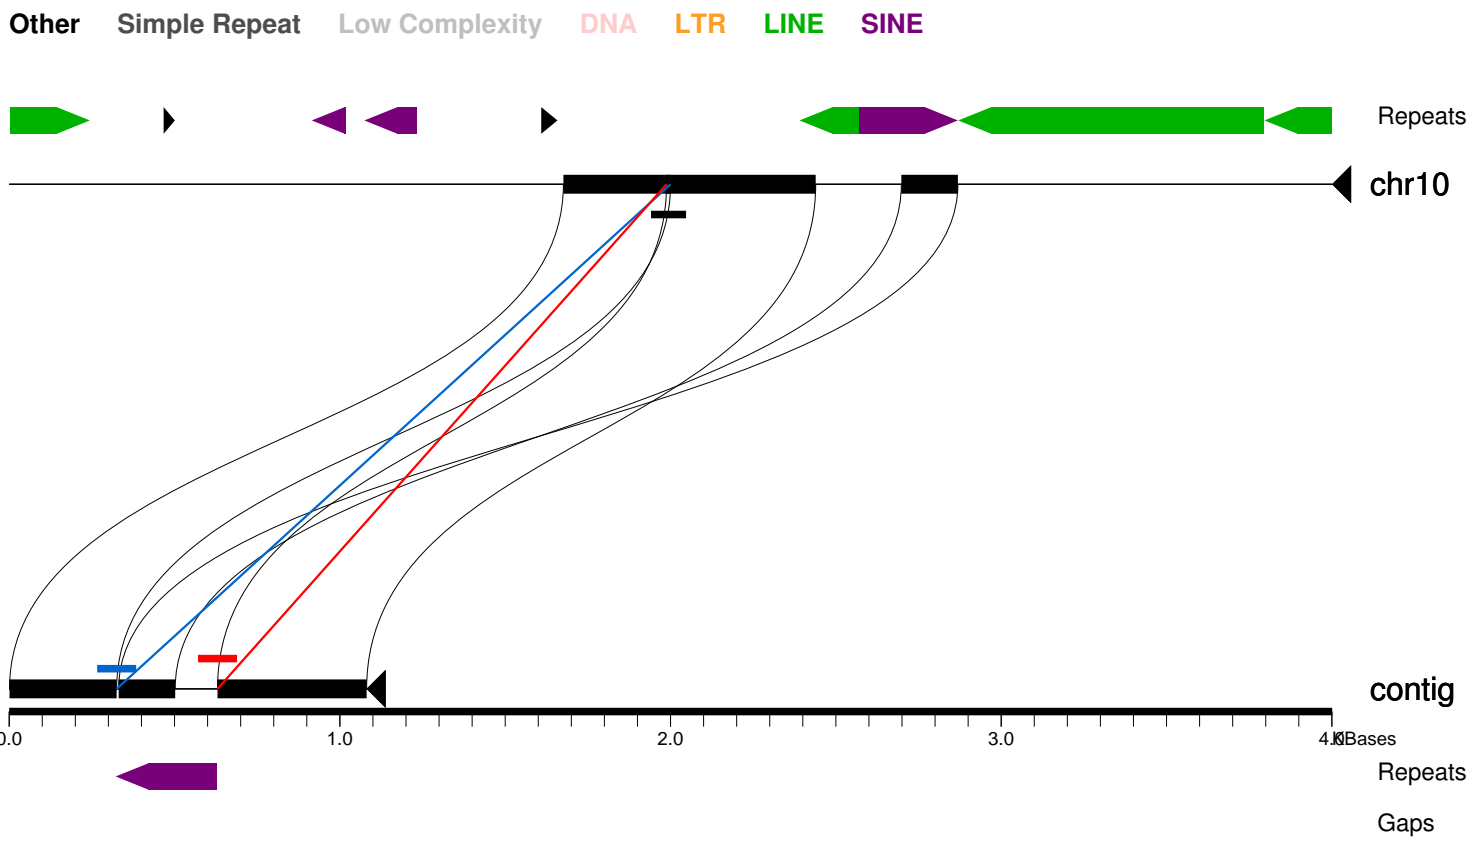

siteID: chr10\_19786302 Scafftig3 - Breakpoint: chr10:19786296

chr10:19786250-19786343

Overlap Length: 14 INS size: 283 Genotyped: Yes

```
left  -----CATGACAAACA-----CAAAAAAGGCACACAGAGCCC----ATAAATAAGCATA
chrom -----CATGACAAACA-----CAAAAAAGGCACACAGAGCCC----ATAAATAAGCATA
right TTGCGCCACTGCAGTCCGCAGTCCGGCCTGGGCGACAAAGCGAGACTCCGTCTCAAAAAAAAAAAAAAAAAA
1111111**111**11*1111111111111111111*1*1****11*1**111*1*111111*1***1**11*1*
```

```
left  CAAGAAGCAATAGATCTGTAAATCCCAGCACTTTGGGAGGCCGAGGCGGGTGGATCATGAGGTCAGGAGAT
chrom CAAGAAGCAATAGAT-TATA-----TAT-----AGTCATATAGA--ATGAACGAAAGGAAT
right AAAGAAGCAATAGAT-TATA-----TAT-----AGTCATATAGA--ATGAACGAAAGGAAT
1*****2*2**2222222222*2*222222222**2*222*2**22*****2222*2*22**
```

```
left  CGAG
chrom ---G
right ---G
222*
```

Other Simple Repeat Low Complexity DNA LTR LINE SINE

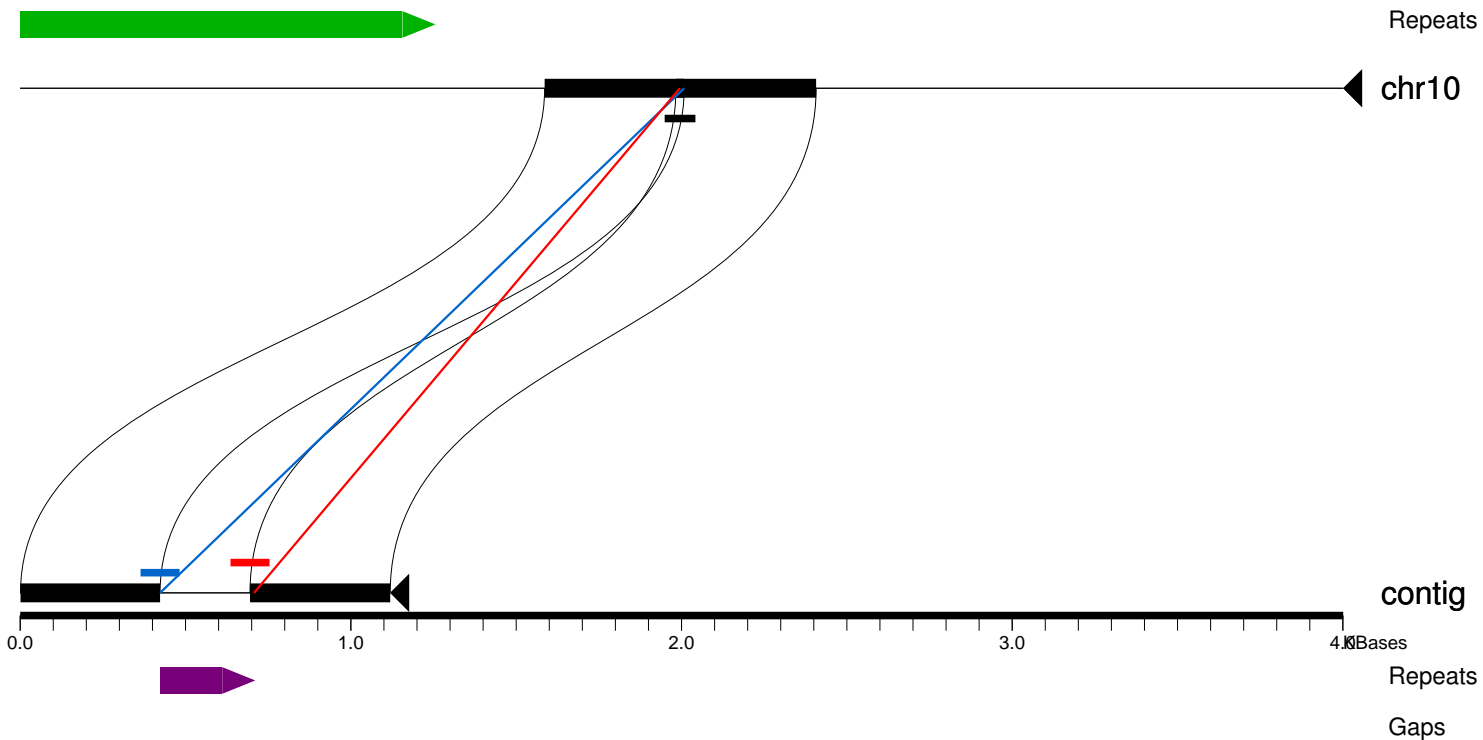

siteID: chr10\_2077559 Scaffitg2 - Breakpoint: chr10:2077543

chr10:2077501-2077602

Overlap Length: 18 INS size: 297 Genotyped: Yes

```
left  AC-ATTG---ACCATC-TGTTCT-CACATTGCAACTACTTTTTCATT-----AGAAATTCAG
chrom AC-ATTG---ACCATC-TGTTCT-CACATTGCGTCTACTTTTTCATT-----AGAAATTCAG
right ACCACTGCACTCCAGCCTGGGCGACAGAGCGAGACTCCGTCTCAAAAAAAAAAAAAAAAAAAGAAATTCAG
      **1*1**1111**1*1**11*11**1*11*12N**1*1*1*111*1111111111111111*****
```

```
left  CATTTTAGGCCGGGGCGCGGTGGCTCACGCCTGTAATCCCAGCACTTTGGGAGGCCGAGGCGGGCGG
chrom CATTTTAATCATTTTAAATT--CCCAGTCTGATAATTCACCATTCC----TGCC-----
right CATTTTAAATCATTTTAAATT--CCCAGTCTGATAATTCACCATTCC----TGCC-----
      *****22*222222222*22*2**22*222*****2**2**2*2222222***22222222222
```

Other Simple Repeat Low Complexity DNA LTR LINE SINE

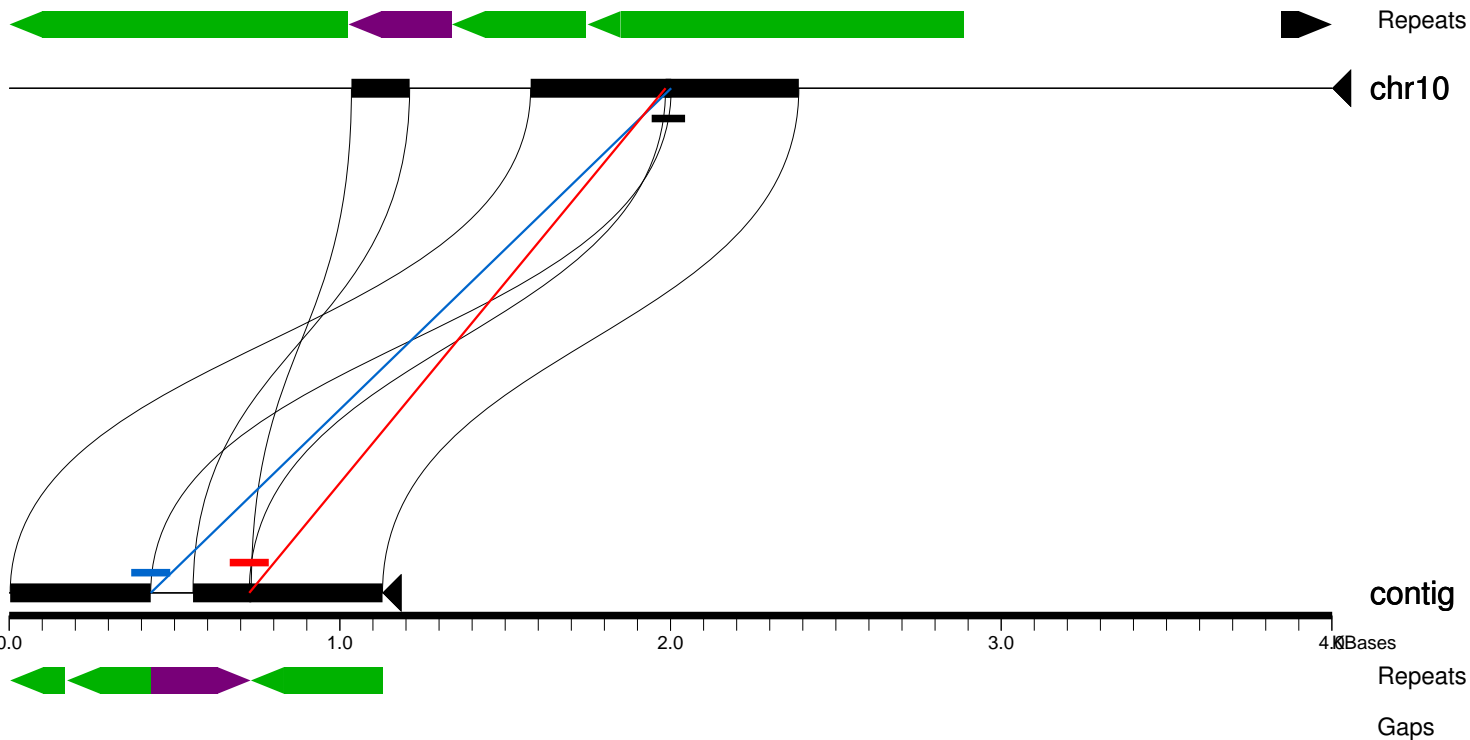

siteID: chr10\_21192804 Scafftig4 - Breakpoint: chr10:21192818

chr10:21192774-21192877

Overlap Length: 16 INS size: 299 Genotyped: Yes

```
left  -TGTAACGGCCAATGGAGACT-----CAGAAGGGAGA-----AGGGTAAGGGATTAAAAATCTACG
chrom -TGTAACGGCCAATGGAGACT-----CAGAAGGGAGA-----AGGGTAAGGGATTAAAAATCTACG
right CTGCAGTCCGCAGTCCGGCCTGGGCGACAGA-GCGAGACTCCGTCTCAAAAAAAAAAAAAAATAAATCTACG
      1**1*111111**1*1111*1**111111****1*1****1111111111*1111**111*11*****

left  GATTGGCCGGGCGCGGTGGCTC-ACGCCTGTAATCCCAGCACTTTGGGAGGCCGAGGCGGGTGGAT
chrom GATTGG----GAACAATTACACTACTCAAGTGACAAGTGCACATA---AAATCTCAGA-----
right GATTGG----GAACAATTACACTACTCAAGTGACAAGTGCACATA---AAATCTCAGA-----
      *****2222*22*22*22*2*2**2*22**2*22222*****22222*22*22**2222222222
```

Other Simple Repeat Low Complexity DNA LTR LINE SINE

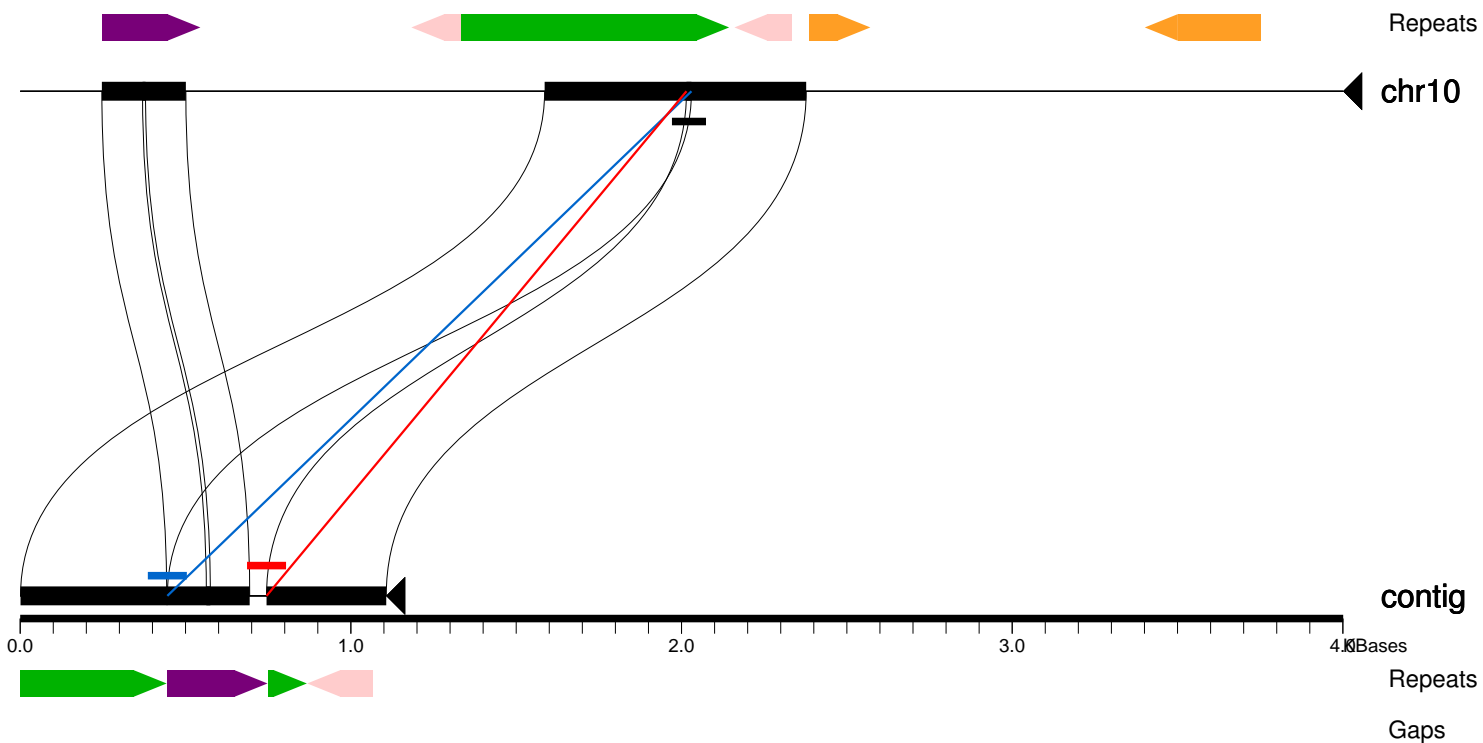













siteID: chr10\_25957312 Scafftig2 - Breakpoint: chr10:25957316

chr10:25957267-25957368

Overlap Length: 11 INS size: 324 Genotyped: Yes

```
left  -----AGA---ACATATAATCTCATTGGATAGCCATGATATTGCTACATTAACATAT---AAGA
chrom -----AGA---ACATATAATCTCATTGGATAGCCATGATATTGCTACATTAACATAT---AAGA
right GCCTGGGCGACAGAGCGAGACTCCGTCTCAAAAAAAAAAAAAAAAAAAAAAAAAAAAAAAAAAAAAAAGA
      111111111111***111*1*11111*****1111*1*111*11*1*11111*1*11**1*1*1111***
```

  

```
left  AGGGGAGGCCGGGCGCGGTGGCTCACGCCTGTAATCCCAGCACTTTGGGAGGCCGAGGCGGGTGGA
chrom AGGGGAGATGAATTTTGGTGGA-CA-GCTAGCATTCTCCTCATTTAA-----TTCT
right AGGGGAGATGAATTTTGGTGGA-CA-GCTAGCATTCTCCTCATTTAA-----TTCT
      *****22222222*****22**2**22*2*2**2*22**2**222222222222222*222
```

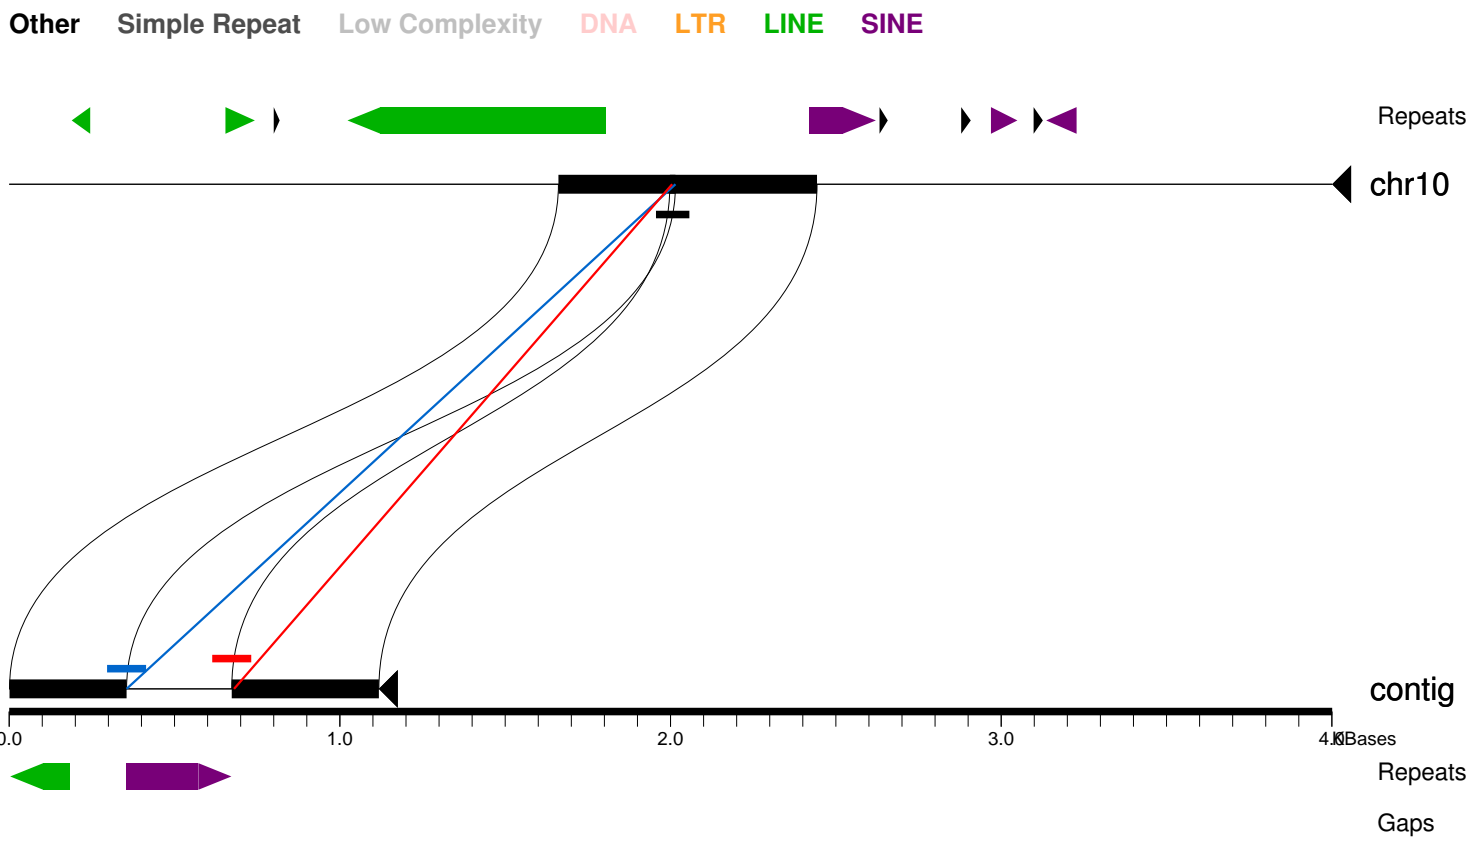





siteID: chr10\_29102548 Scafftig10 + Breakpoint: chr10:29102528

chr10:29102482-29102587

Overlap Length: 14 INS size: 301 Genotyped: Yes

```
left  -----GTTTTTGGATGGTAA-----GAATAAAAAATTGTGAAAGTGTCAATTTTTTTTCTAAATCATCT
chrom -----GTTTTTGGATGGTAA-----GAATAAAAAATTGTGAAAGTGTCAATTTTTTTTCTAAATCATCT
right CCGCCCGCTTCGGCCTCCCAAAGTGCTGGGATTACAGGCGTGAGCCACCGCGCCCGGCCCTAAATCATCT
      1111111*1**11*11*111**11111111*1**1*1*111****11111111111111111111*****

left  ATTTTTTTTTTTTTTTTTTTTTTTTTTTGAGACGGAGTCTTGCTCTGTCGCCCAGGCTGGAGTGCAG--
chrom ATTAA-----TTCAATGCAACC---TCATGAAAAATTACAAAGGGATTGTTTTAGTC
right ATTAA-----TTCAATGCAACC---TCATGAAAAATTACAAAGGGATTGTTTTAGTC
      ***2222222222222222**222**22**2222**2**22222*22*22***222222*22**22
```

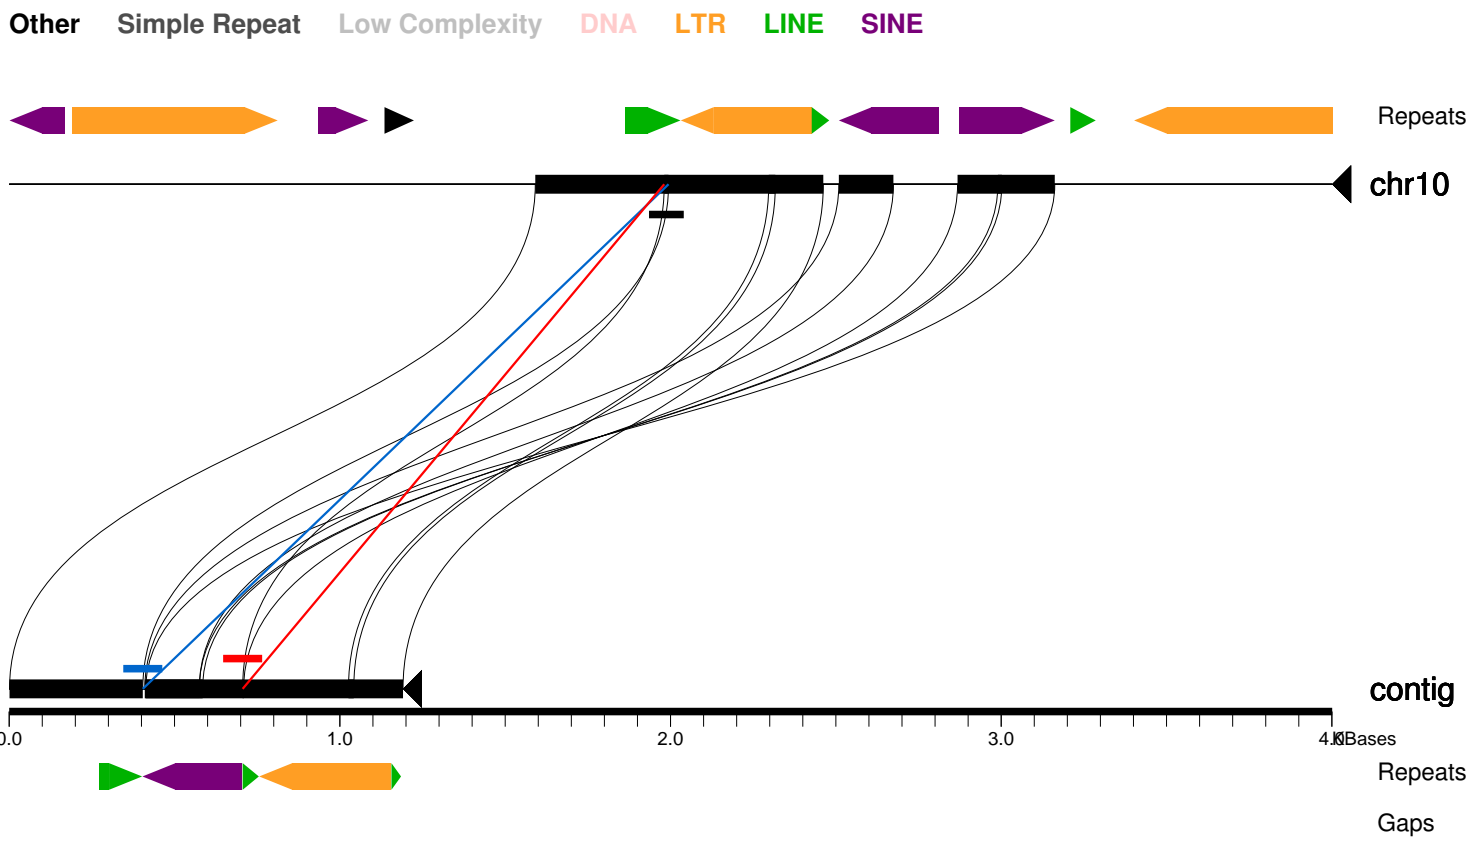



siteID: chr10\_36467324 Scaffitig1 + Breakpoint: chr10:36467292

chr10:36467247-36467351

Overlap Length: 15 INS size: 294 Genotyped: No

```
left -----GTAACCCAAAG-GAGACTATTCCAAGGATATGACAT-GTAAGCTAAATGATTAGACAT
chrom -----GTAACCCAAAG-GAGACTATTCCAAGGATATGACAT-GTAAGCTAAATGATTAGACAT
right CCGCCCGCCTCGGCCTCCCAAAGTGCTGGGATTACAGGCGTGAGCCACCGCGCCCGGCCGATTAGACAT
      1111111111111111*1111*****1*111111***1**1*11*11*1**11*1111*1111*****
```

```
left TTCCTTCTNNNNNNNNNNNNNNNNNNNNNNNNNNNNNNNNNNNNNNNNNNNNNNNNNNNNNNNNNNNNNN
chrom TTCCT-----AAGGAAAGAAGGAAAAATATACTGTAGGCAGGAGGAAGTGGATCTC
right TTCT-----AAGGAAAGAAGGAAAAATATACTGTAGGCAGGAGGAAGTGGATCTC
      ***22222222222222222222222222222222222222222222222222222222222222222222
```

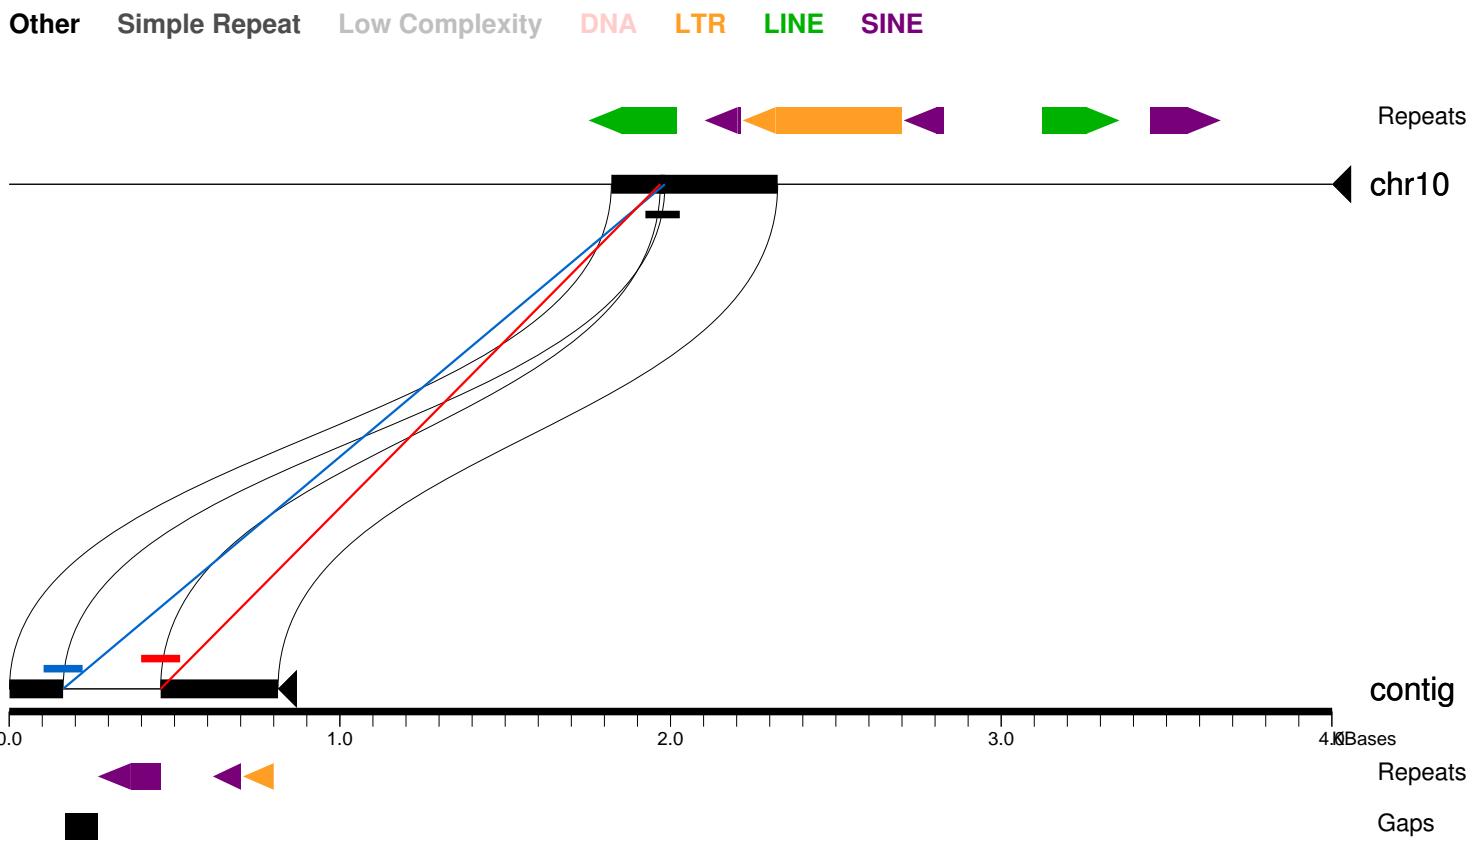

siteID: chr10\_36593640 Scaffitg3 + Breakpoint: chr10:36593622

chr10:36593462-36593787

Overlap Length: 6 INS size: 315 Genotyped: Yes

```
left      T---CTAAAAATTATTTTAGCCAAATGAAACTAAATAATACTGCCTTTTAAATAGGTGGATAATTTGATGA
chrom     TATTCTAAAAATTATTTTAGCCAAATGAAACTAAATAATACTGCCTTTTAAATAGGTGGATAATTTGATGA
right     TTTAGTA-----GAGACGGGGTTTCAC--CTTGTTAACCAGGATGGTC--TCGAT--
*N2N1**11111111111111111111**1**1111*111**11*1*1****11***11*1*111*1***11
```

```
left      ATTCTTTGAAAAGAATTGTCCAAATAATATATTAAGTGTCTTTCCAATTGCTTATTTATGTCTACCTGTA
chrom     ATTCTTTGAAAAGAATTGTCCAAATAATATATTAAGTGTCTTTCCAATTGCTTATTTATGTCTACCTGTA
right     ---CTCCTGACCTCATGATCCACCCGCTCG-----GCCTCCCAAAGTGCTGGGAT-----TACAGGCG
111**1111*1111**11****1111111111111111*1**11*1*1****1111*11111***11*11
```

```
left      GTAATCTCTTATACTGACATGGATTTPPTTTTTTTTT---TTTTTTTTTTTTTTTTTTGAGACGGGG---
chrom     GTAATCTCTTATACTGACATGGATTCTTTTATTGATAGGCTGTATGTATGTGGCTTTGGCTCCTACATAA
right     TGAGCCACCGCGCCCGCC-GGATTTCTTTATTGATAGGCTGTATGTATGTGGCTTTGGCTCCTACATAA
11*11*1*11111*1*1*11*****2***2**22*2222*2*2*2*2*2*222***222*22222222
```

```
left      ---TCTCGCTCTGTTCGCCAGGCCGACTGCGGACTGCAG---TGGCGCAATCTCG-GCTCA---CTGC
chrom     ATATCACCCCACTTCCCTTTAAGAATAATTAATAAGTGAAAAAGCTTGCTTCACTCTCTTGCTGAGCCCAGC
right     ATATCACCCCACTTCCCTTTAAGAATAATTAATAAGTGAAAAAGCTTGCTTCACTCTCTTGCTGAGCCCAGC
222**2*2*2222**2222*2*2222*2*2222*2**2*22222**222**2****22***2*222*2**
```

```
left      -----AAGCTCCGC-----TTCCCGGG-----TTCACG-----
chrom     TTAATGAATATCGGTAAAAATAATTGCATGACAACATTAATGATGAA
right     TTAATGAATATCGGTAAAAATAATTGCATGACAACATTAAT-----
222222**22**2*22222222**2*22*222222**2*21
```

Other Simple Repeat Low Complexity DNA LTR LINE SINE

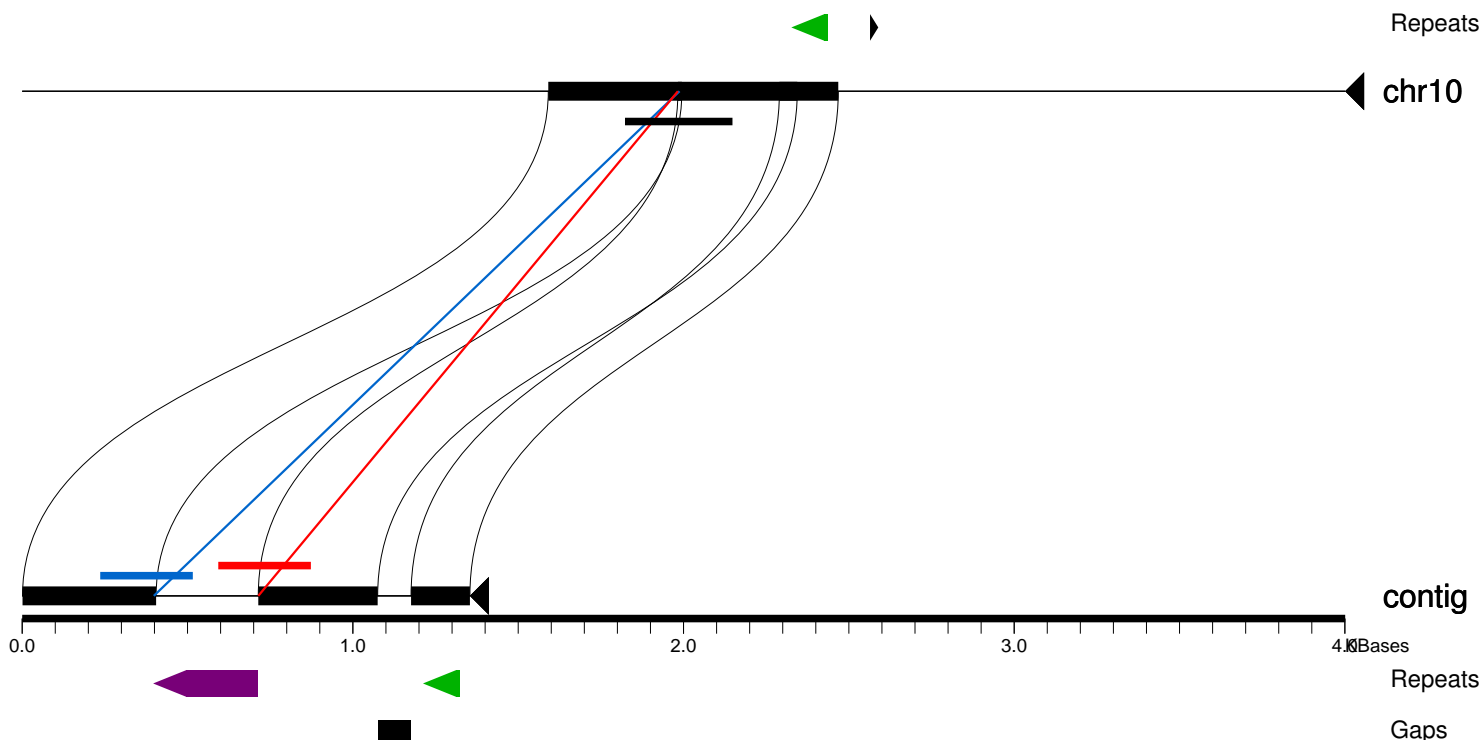



siteID: chr10\_4317493 Scaffoldig2 - Breakpoint: chr10:4317420

chr10:4317260-4317591

Overlap Length: 12 INS size: 302 Genotyped: No

```
left -----TAATGCATGCTGGGCTCAATACCTAGGTAATGAGTTGATAGGTGCAGCAAACCACCATG
chrom GGATAAACAGCTAATGCATGCTGGGCTCAATACCTAGGTAATGAGTTGATAGGTGCAGCAAACCACCATG
right T--TCAGTAGAGACGG-----GGTTTCA---CC-----GTTT-TAG-----CCGGGATG
N 2N2NN22N1*11*111111**11***111**1111111111***11***1111111111**111***
```

```
left GCACATGTTTGCCTACGTAATGAACCTGCACCTTCTGCACATGTACCCGAGAGCTTAAAAATTTAAAAAAA
chrom GCACATGTTTGCCTACGTAATGAACCTGCACCTTCTGCACATGTACCCGAGAGCTTAAAAATTTAAAAAAA
right GTCTCGATCTCTCGACCTCGTGATCC-GCCCGCCTCGGCC---TCCCAAAGTGCTGGGATT----ACAGG
*1111111*1*1*11**1*11***1**1**1*11*11*11*111*1**11**1***111*1*1111*1*11
```

```
left ATTTAAAAAGTATAACTTGT-AGTCATGTATATTTTTTTTTTTTTTTTTTTTTTGAG-ACGGAGTCTCGC
chrom ATTTAAAAAGTATAACTTGT-AGTCATGTATACTTAAACAACCTTTAAAAACTAATGTACTGTGTTCCCC
right CGTGAGCCACCGCGCCCGGCCAGTCATGTATATCTTAAACAACCTTTAAAAACTAATGTACTGTGTTCCCC
11*1*111*111111*11*11*****2**222222***222222*222*2**2*2**22*2*
```

```
left TCTGTCGCCCAGGCTGGAGTGCAGTGGCGGGATCTCGGC-----TCA-----CT-----GCAAGCT--
chrom CTTTTCCTTCAAGGAAAACCATTATAATATGATCTTGTCAATAATCAGCATTTTCTAGTTAGGAAACTTG
right CTTTTCCTTCAAGGAAAACCATTATAATATGANNNNNNNNNNNNNNNNNNNNNNNNNNNNNNNNNNNNNNNN
22*2**222*2*2222*22222*22222**111N1N1NNNNN111NNNNNNN11NNNNN1N1N11N1NN
```

```
left ----CCGCCTCC---CGGGTTC-----ACGCCATTCTCC---TGCCTC
chrom ATAACATTATCAAAAAGTGTTTTTTTTGGAGAGAATACAATTTTGACAATTTCTAC
right NNNNNNNNNNNNNNNNNNNNNNNNNNNNNNNNNNNNNNNNNNNNNNNNNNNNNNNNNNNNNNNNNNNNNNN
NNNN1NNNN11NNNN1N1N11NNNNNNNNNN1NN1N111N1NN 1N1NN1
```

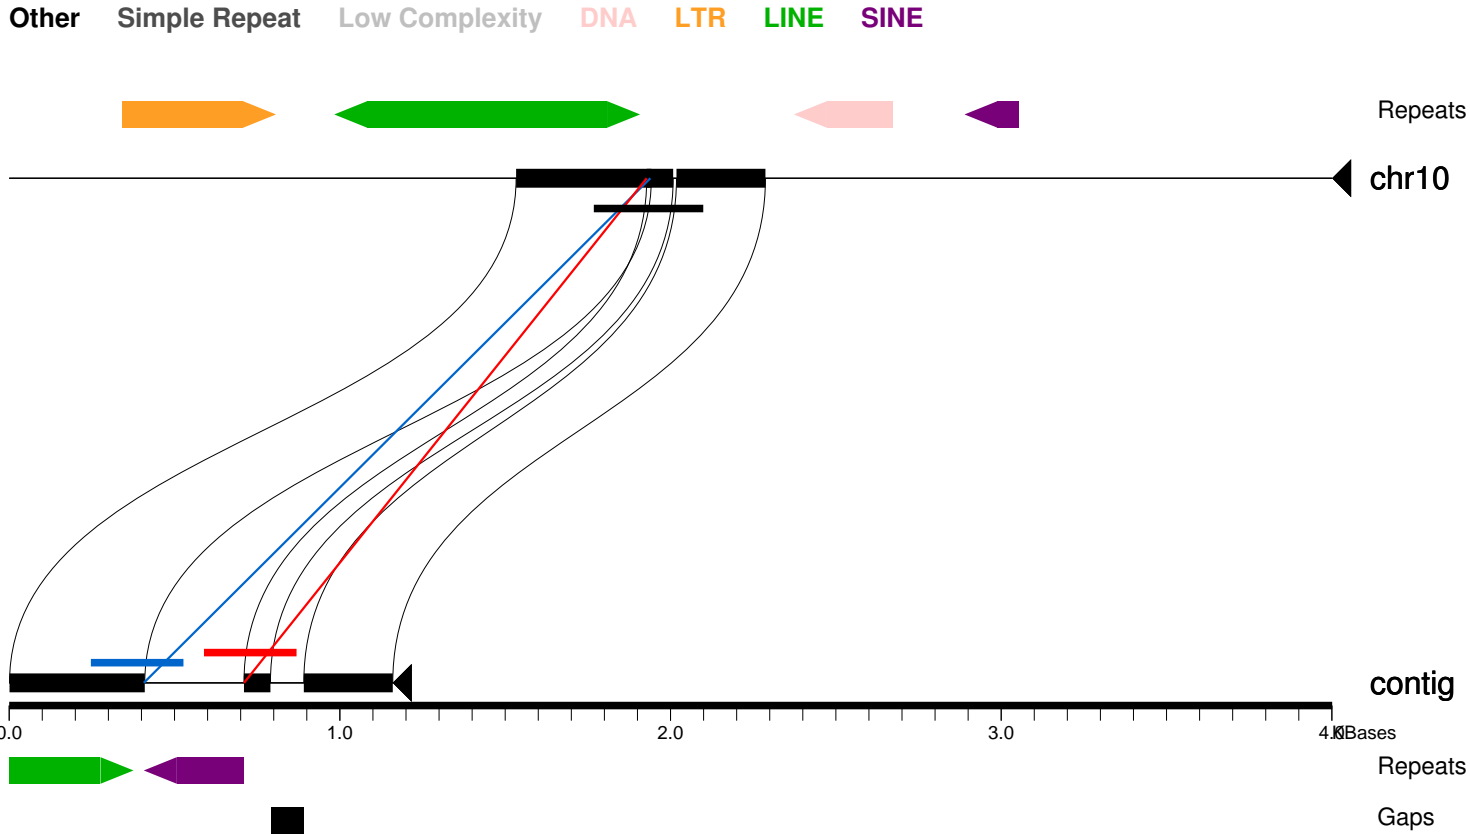



siteID: chr10\_44192668 Scaffitg1 - Breakpoint: chr10:44192642

chr10:44192599-44192701

Overlap Length: 17 INS size: 434 Genotyped: No

```

left      -----GCATAACAAATTACCAC----ACAACGGGGAACCAACAGCTACTTATTTGTCTTGCAGT
chrom     -----GCATAACAAATTACCAC----ACAACGGGGAACCAACAGCTACTTATTTGTCTTGCAGT
right     CCACCCGCCTCGGCCTCCCAAAGTGCTGGGATTACAGGCGTGAGCCACCGCGCCCGGCCTTGTCTTGCAGT
           111111111111111111**1*11****1*1*11111111***111*1**1***1*11111*1111*****
left      TTCTTTTTTTTTTTTTTTTTTTGTAGACGGAGNNNNNNNNNNNNNNNNNNNNNNNNNNNNNNNNNNNNNNNN
chrom     TTCTTT-----AGGAC--AGAAGTTCAGGCCCGACGTGGCTAGCCTCTCCACGTAG
right     TTCTTT-----AGGAC--AGAAGTTCAGGCCCGACGTGGCTGGCCTCTCCACGTAG
           *****2222222222222222***22**2222222222222222222222222222222222222222
  
```

Other    Simple Repeat    Low Complexity    DNA    LTR    LINE    SINE

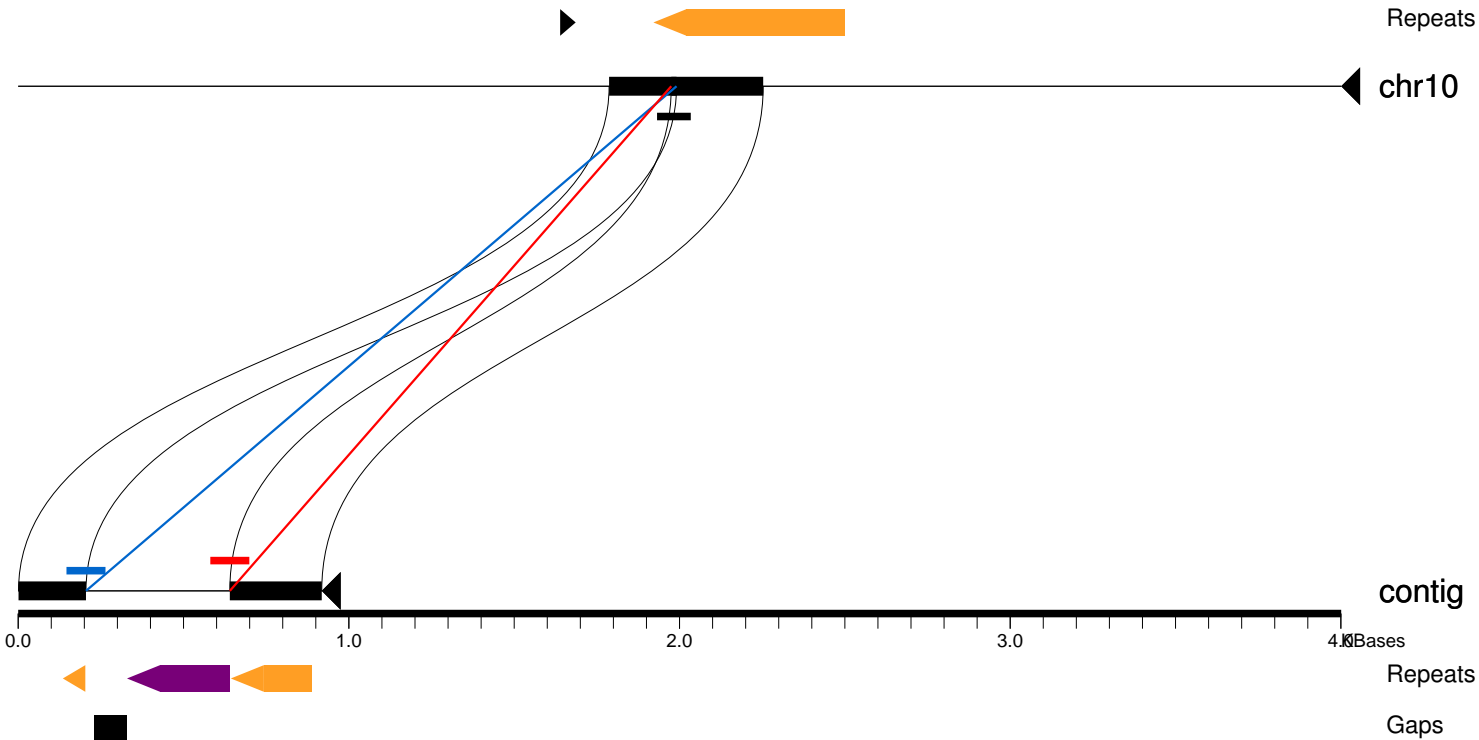

siteID: chr10\_48419948 Scaffitig13 + Breakpoint: chr10:48419944

chr10:48419893-48420003

Overlap Length: 9 INS size: 308 Genotyped: Yes

```
left  ----CTGAA-TTATGGTAGTCTTATGTGTCTATACCTAAATAAAGCAAAGACTGGC---ATAAAATTTT
chrom ----CTGAA-TTATGGTAGTCTTATGTGTCTATACCTAAATAAAGCAAAGACTGGC---ATAAAATTTAA
right TCTCCTGACCTCGTGATCCGCCCGCCTCGGCCTCCCAAAGTGCTGGGATTACAGGCCTGATAAAATTTAA
      1111****11*11**1*111*11111*11111*1**1**1*111*11*11**1***111*****22
```

```
left  TTTTTTTTTTTTTTTTTTTTTTTTTTTTTTTTTTTTTTTTTTTTTTTTTTTTTTTTTGAGACGGAGTCTCGC
chrom  GAAAATCTACACCAAAGTGTCTTCAGTCTCTGCCTTAGGTTT-----ACTTTCG-
right  GAAAATCTACACCAAAGTGTCTTCAGTCTCTGCCTTAGGTTT-----ACTTTCG-
      22222*2*222222222*2*2**222*2*2*222**222***2222222*2*2***2
```

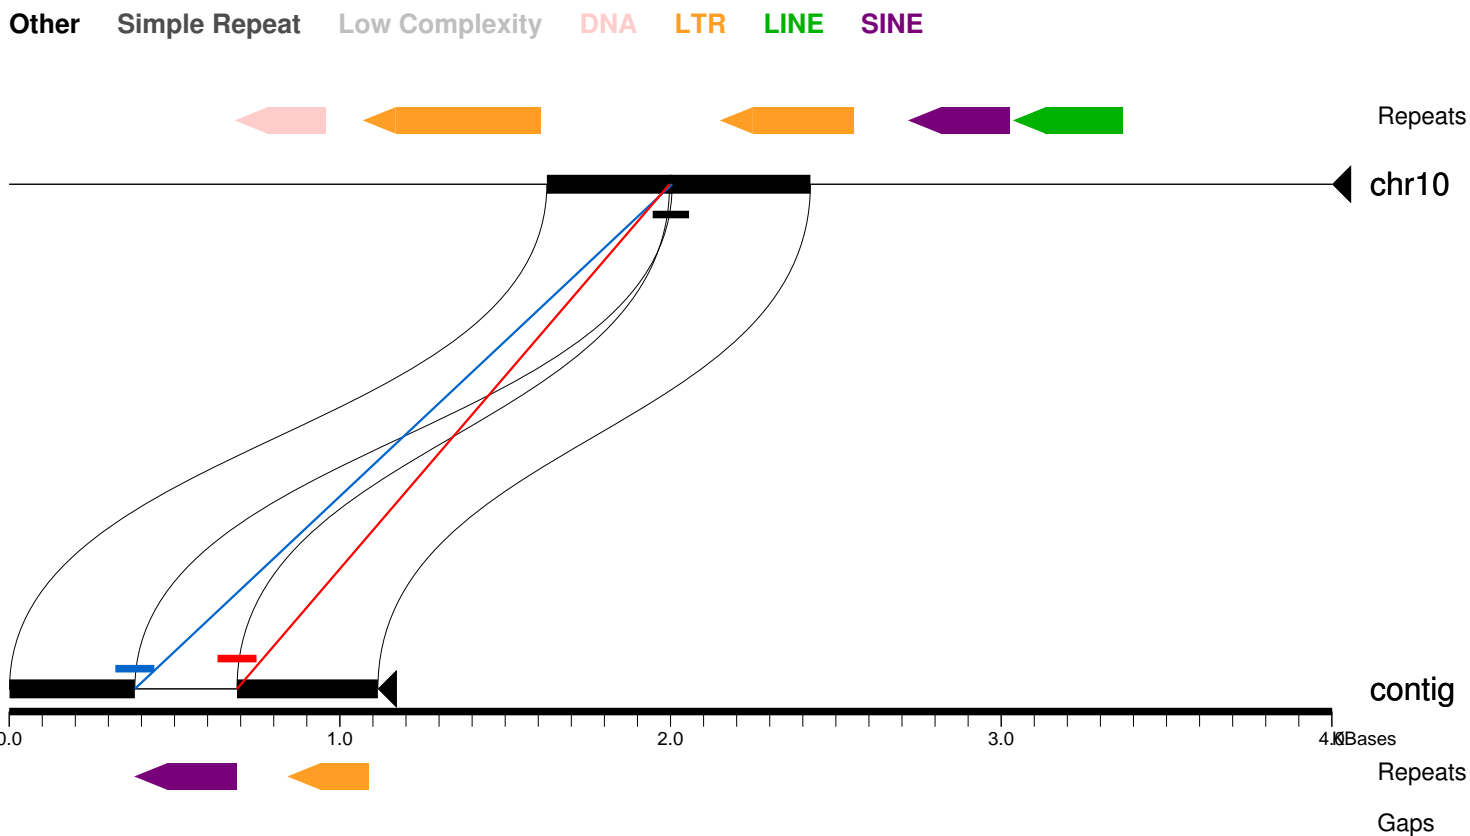

siteID: chr10\_53862412 Scafftig3 - Breakpoint: chr10:53862415  
 chr10:53862047-53862575  
 Overlap Length: 15 INS size: 320 Genotyped: No

```

left   NNNNNNNNNNNNNNNNNNNNNNNNNNNNNNNNNNNNNNNNNNNNNNNNNNNNNNNNNNNNNNNNNNNNNNNNNNNNNNNNNNNNNNNNNNNNNNN
chrom  ACATATTTAATTTCAGCCTCTAGACCAGGAGTCCACATGACGTTTAAGGCACAAACATCACAACCATATGCT
right  NNNNNNNNNNNNA-----
left   NNNNNNNNNNNNNNNNNNNNNNNNNNNNNNNNAA-----
chrom  GTGGAAAAGAAATTGACAATGCTCTGAAAAGAGAAATCTCTGCAGAGGGAACATCATAAGCATCTGGAAGGATT
right  NNNNNNNNNNNNNNNNNNNNNNNNN11
left   -----
chrom  TCACCAGTGAAAATGCCGTCATCCTTATAGAAAAATCTGTGAAAAGCCATCAAGCCCAAAACAACAAATTT
right  -----
left   -----
chrom  CTGCTGGAGGAAAACGGTCTAGATGTTTGTGCATGAATTCATAGGATCTGTGACTGAGCCAATCACGAAAAAT
right  -----
left   -----AAATTGGTGGGAGGTAAGGGGTTTCAAGATA
chrom  CATGAAAAGAGACTGTGGATATGGCAAAAAAAAAAAGAAAAAAAAAATGGTGGGAGGTAAGGGGTTTCAAGATA
right  -----
left   GGGATCTTGGAGACATTC AAGAGCTAACAGACA AGGCC---GAGGCGGG--CGGATCACGAGGTCA-GGA
chrom  GGGATCTTGGAGACATTC AAGAGCTAACAGACA ACACACCAGAGGATTTAACAGAAGATGACTTGATGGA
right  -----AAGAGCTAACAGACAACACACCAGAGGATTTAACAGAAGATGACTTGATGGA
left   GATCGAGACCAT-----CCTGGCTAACACGGTGAA----ACCCCGTCTC--TACTAAAAATACAAA---A
chrom  GAT-GAGTACTTTGGAGCCAGTGTTCAGACAATGAGGAAGACATAGACGCAGTGCCAGAAA-ACAAATTGA
right  GAT-GAGTACTTTGGAGCCAGTGTTCAGACAATGAGGAAGACATAGACGCAGTGCCAGAAA-ACAAATTGA
left   AATTAGCC-----GGGCGTAG-TGGCGGGCGCCTGTAGTC-
chrom  CATTAGACAATCTGGCAGAAGATTTCCACTTACTTAAAGACT
right  CATTAGACAATCTG-----
  
```

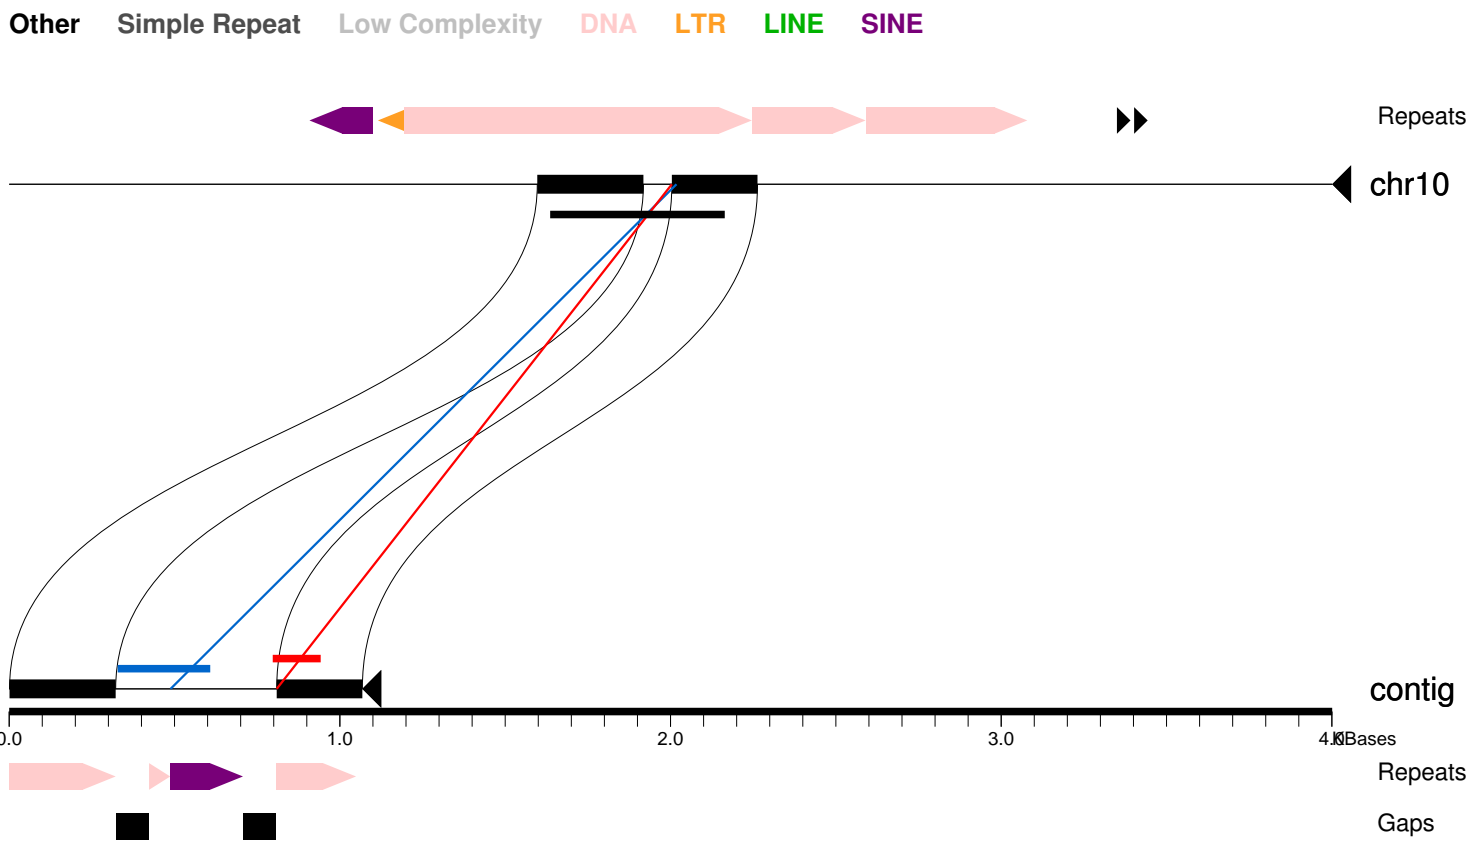





siteID: chr10\_54466944 Scaffitig5 - Breakpoint: chr10:54466933

chr10:54466883-54466988

Overlap Length: 9 INS size: 315 Genotyped: Yes

```
left  GATAA-----TGGAGAAGATGCAGGGAGTTTGT-TCTGCCCATTTTCTTCTTAAAA----GTGTCCT
chrom GATAA-----TGGAGAAGATGCAGGGAGTTTGT-TCTGCCCATTTTCTTCTTAAAA----GTGTCCT
right CTGCACTCCAGCCTGGGCGACAGAGCGAGACTCCGTCTCAAAAAAAAAAAAAAAAAAAAAAAAAAAAAAAGTGTCTT
      1111*111111111***111*1*1111*1**1*11**1**11111*1111111111***1111*****
```

```
left  TTCGGCCGGGCGCGGTGGCTCACG-CCTGTAATCCCAGCACTTTGGGAGGCCGAGGCGGGCGG
chrom TTC---CCTTCCTAAGTTAAGCAAGGCCTATAGT---AAGACTCT--CAGTGCTA-----CTG
right TT---CCTTCCTAAGTTAAGCAAGGCCTATAGT---AAGACTCT--CAGTGCTA-----CTG
      **222**222*222**2222**2*2***2**2*222*22***2*222**22*2*222222*2*
```

Other Simple Repeat Low Complexity DNA LTR LINE SINE

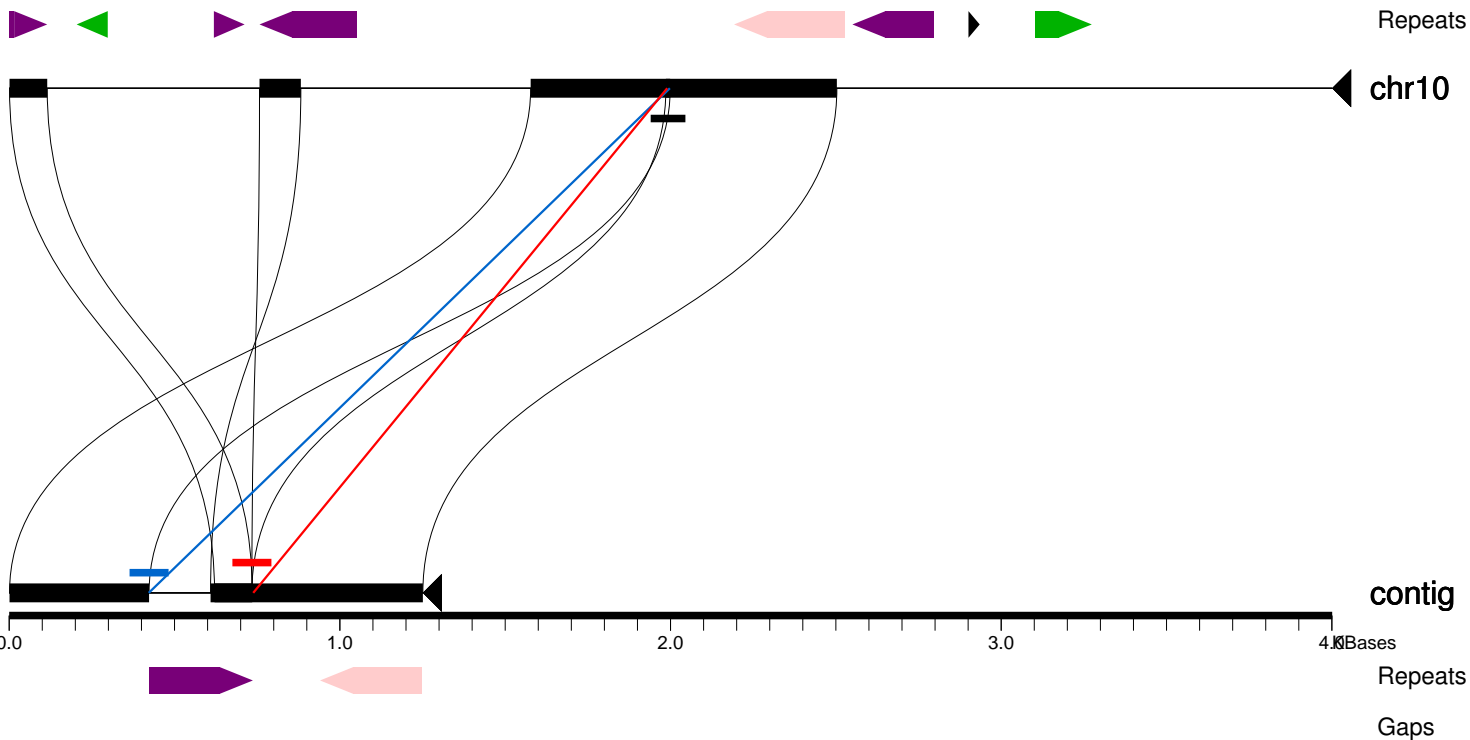



siteID: chr10\_54682273 Scafftig2 - Breakpoint: chr10:54682254

chr10:54682239-54682313

Overlap Length: 45 INS size: 385 Genotyped: No

left T-----TT-----AAAGC-----ACAA---TAA-----TATTTTTTTTA  
chrom T-----TT-----AAAGC-----ACAA---TAA-----TATTTTTTTTA  
right CCACCCGCCTTGGCCTCCCAAAGTGCTGGGATTACAAGCGTGAGCCACCGCGCCCGGCC TATTTTTTTTC  
1111111111\*1111111111\*\*\*\*1111111111\*\*\*\*111\*1\*1111111111111111111\*\*\*\*\*1

left TTTTAACTACTTTGTAAATGAGTTTTTATCAA TNNNNNNNNNNNNNNNNNNNNNNNNNNNNNNNNNNNNNNNNNNNNNNNNNNNNNNNNNNNNNNNN  
chrom TTTTAACTACTTTGTAAATGAGTTTTTATCAA TAGATTCTGGTGAATC-----  
right TTTTAACTACTTTGTAAATGAGTTTTTATCAA TAGATTCTGGTGAATC-----  
\*\*\*\*\*2222222222222222222222222222222222222222222222222222222222222222222222222222222222222222222

left NNNNNNNNNNNNNNNNNNNNNNNNNNNNNNNNNNNNNNNNNNNNNNNNNNNNNNNNNNNNNNNNNNNNNNNNNNNNNNNNNNNNNNNNNNNNNNN  
chrom -----  
right -----  
2222222222222222222222222222222222222222222222222222222222222222222222222222222222222222222222222222222

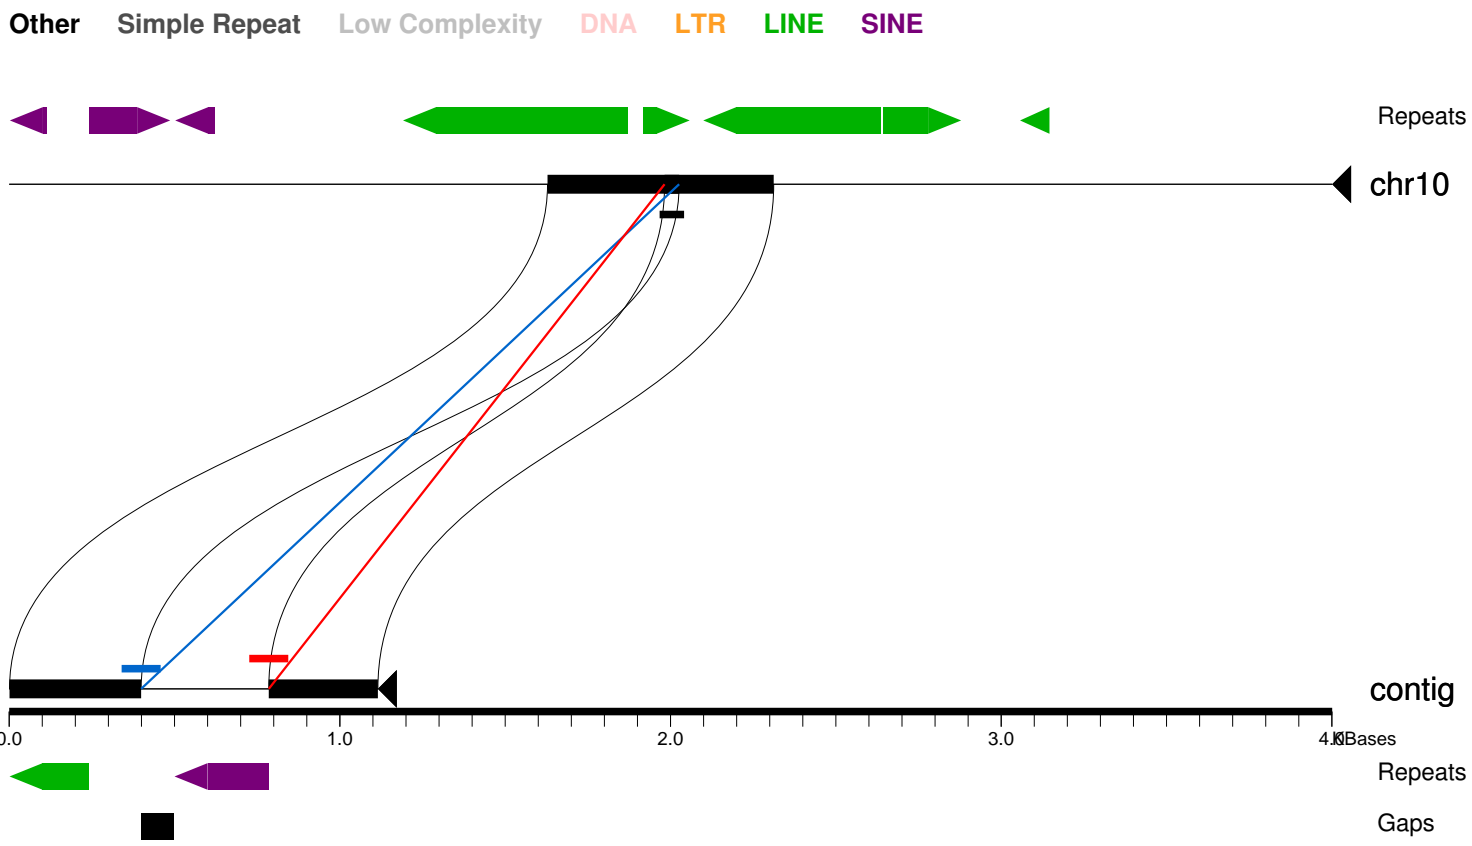



siteID: chr10\_56140333 Scaffoldig2 + Breakpoint: chr10:56140319  
 chr10:56140264-56140378  
 Overlap Length: 5 INS size: 351 Genotyped: No

```

left  TGAGAAATGAAAGGGAATTTATTTTCTCATCAAGAAAACCTTATGTACAATAGGC----AGGTGCGCCGG
chrom TGAGAAATGAAAGGGAATTTATTTTCTCATCAAGAAAACCTTATGTACAATAGGC----AGGTCAACTAA
right NNNNNNNNNNNNNNNNNNNNNNNNNNNNNNNNNNNNNNNNNNNNNNNNNNNNNNNNNNNNNNNNNNNNNNNNNNN
    11111111111111111111111111111111111111111111111111111111111111111111111111
left  GCGCGGTGGCTCACGCCTGTAATCCCAGCACTTTGGGAGGCCGAGGCGGGTGG-
chrom -CATTAACATTAATACCTTGACTCAATAGTGTTTAAGAGTA----GCAACTGCA
right -CATTAACATTAATACCTTGACTCAATAGTGTTTAAGAGTA----GCAACTGCA
    2*22222222*2*22***22*2**2222222***22***222222*222222*222**22
  
```

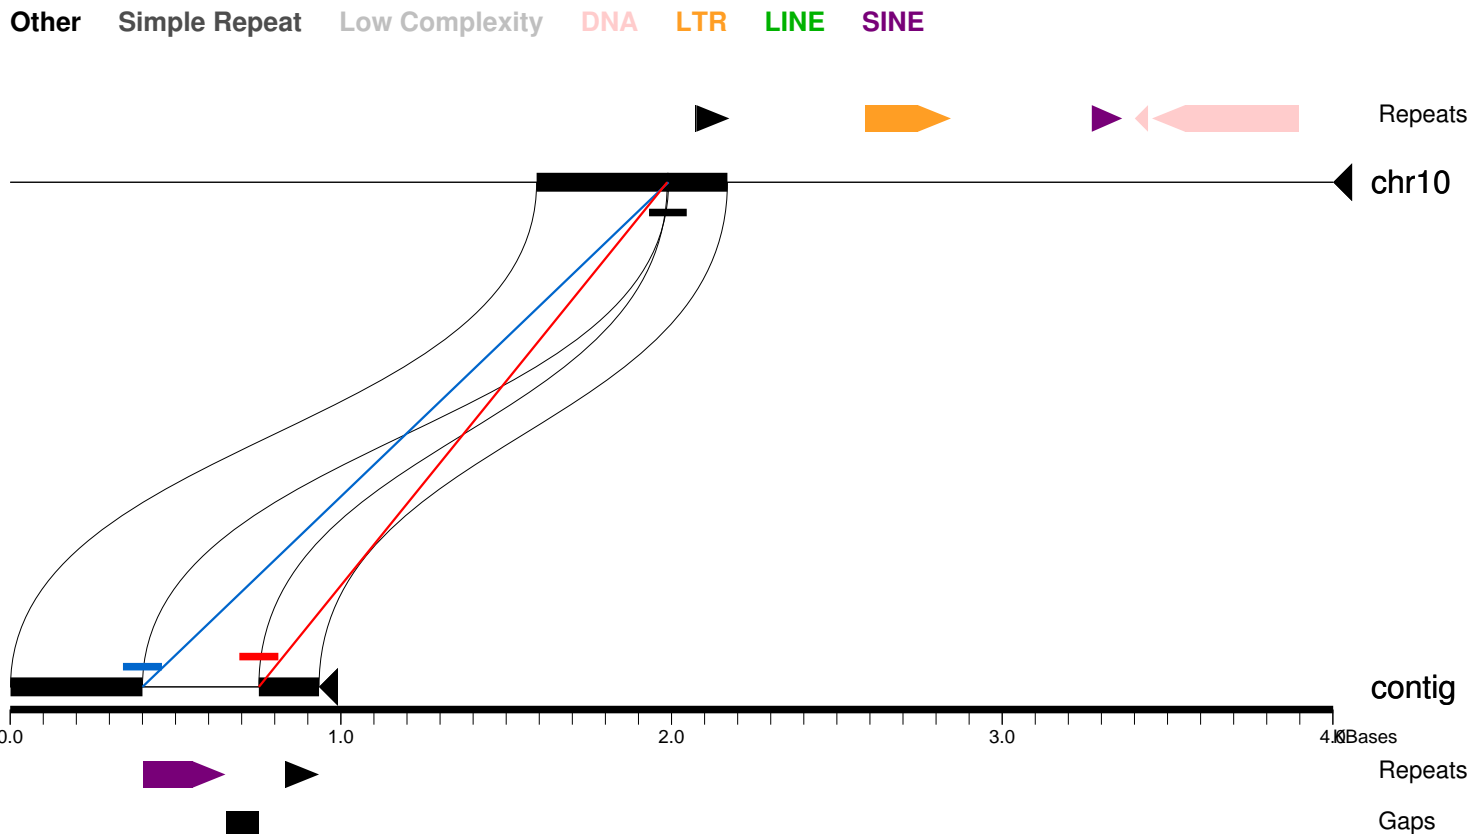



siteID: chr10\_56902374 Scafftig6 + Breakpoint: chr10:56902354

chr10:56902319-56902413

Overlap Length: 25 INS size: 291 Genotyped: Yes

```
left      T-----ACATAG-----ATTGTG-TGTATCTATAGTTTTTTGCATA-----TACTACAGTTA
chrom     T-----ACATAG-----ATTGTG-TGTATCTATAGTTTTTTGCATA-----TACTACAGTTA
right    CCGCCCGCCTCGGCCTCCCAAAGTGTGGGATTACAGGCGTGAGCCACCGCGCCCGGCC TACTACAGTTA
          1111111*1*1*1111111*11***1**1111**1**111*11**1111111111111111*****
```

```
left      TTTTTTATTTTTTTTTTTTTTTTTTGGAGACGGAGTCTCGCTCTGTCGCCAGGCTGGAGTGCAGTGGCGGGA
chrom     TTTTTATATATTTTTCATAAATAT-ATTTGTACTC---CTATGTAGATAT-----A
right    TTTTTATATATTTTTCATAAATAT-ATTTGTACTC---CTATGTAGATAT-----A
          *****2***2****22*222*2*2*222*2*2**222**2***2*2222222222222222222222222222*
```

```
left      TCT
chrom     TCT
right    TCT
          ***
```

Other    Simple Repeat    Low Complexity    DNA    LTR    LINE    SINE

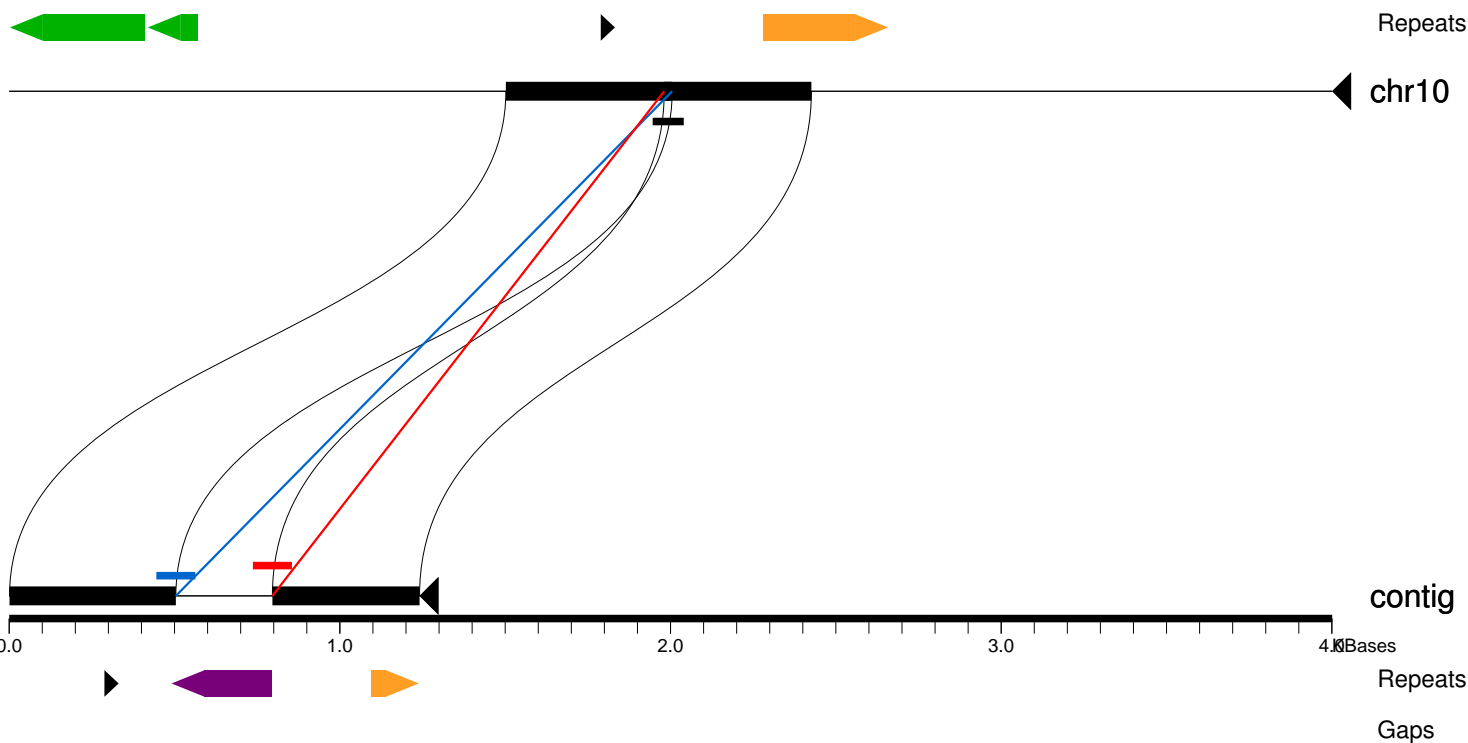



siteID: chr10\_58370641 Scafftig4 + Breakpoint: chr10:58370653

chr10:58370611-58370712

Overlap Length: 18 INS size: 126 Genotyped: Yes

```
left  TACATG--TAACTGCAGTCTCAGA-----AGGACAGAGTAGGG----AGAAGTTTGGACTGGAA
chrom TACATG--TAACTGCAGTCTCAGA-----AGGACAGAGTAGGG----AGAAGTTTGGACTGGAA
right ATCTCGGCTCACTGCAAGCTCCGCTTCCCGGGTTACGCCATTCTCCTGCCTCAGCCTCTTGGACTGGAA
      11*11*11*1*****11**1*111111111111*1*1**111*111*1111**1111*****
```

```
left  AATTTT*TTTTTTTTTTTTTTTGGAGACGGAGTCTTGCTCTGTTCGCCAGGCCGGACTGCGGACAGCA
chrom AATTTT*AAAAAATATTCTTCAATGAC-----TTAAAAATATTGATTAGA-----AGAGTC
right AATTTT*AAAAAATATTCTTCAATGAC-----TTAAAAATATTGATTAGA-----AGAGTC
      **2***22222*2**2**2222**222222**2222*2*2*222**222222222222*2**22
```

Other Simple Repeat Low Complexity DNA LTR LINE SINE

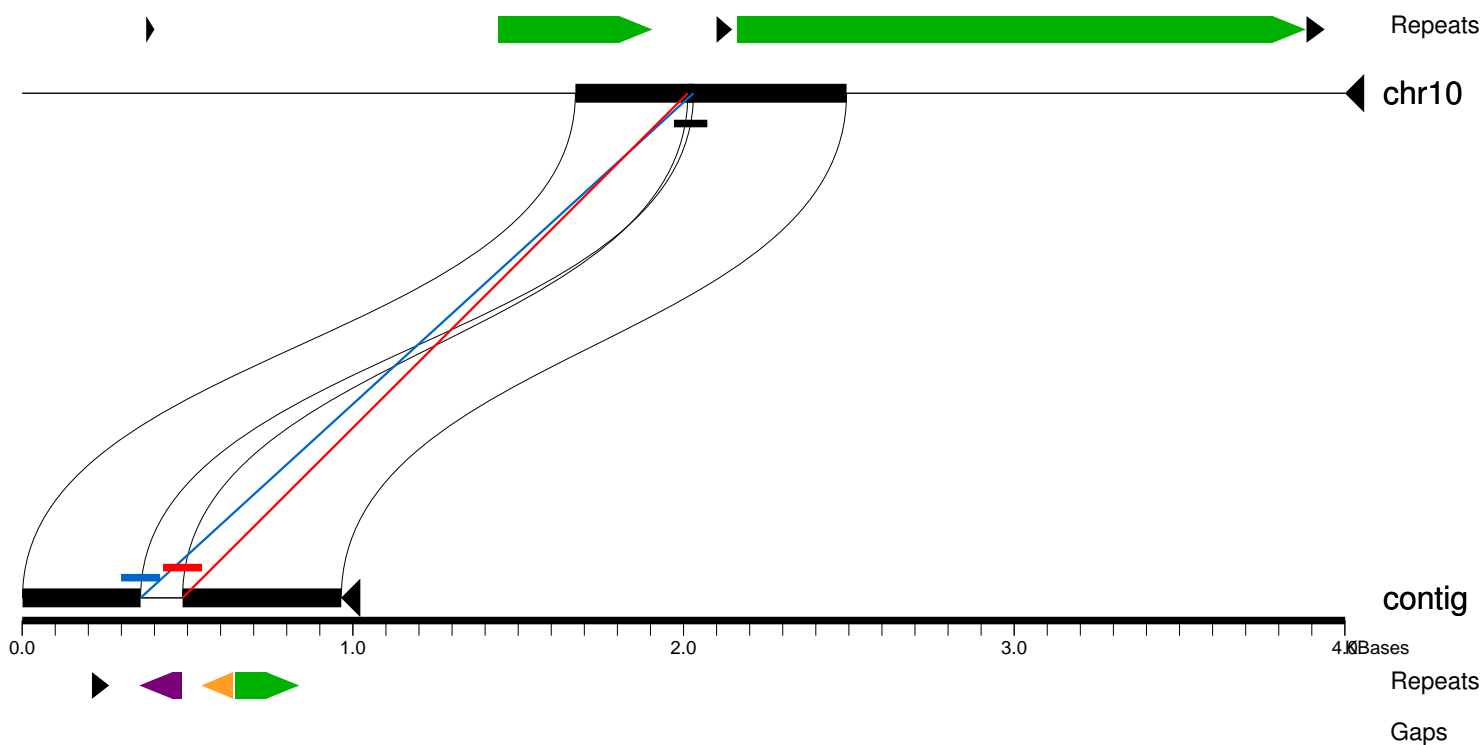









siteID: chr10\_62124855 Scafftig2 - Breakpoint: chr10:62124845

chr10:62124799-62124904

Overlap Length: 14 INS size: 272 Genotyped: Yes

```
left  -----GGCTTTGGCTATTATTTGCCATTTTCCCTCATCTTGTATGGTGCCTAAAAAAT
chrom -----GGCTTTGGCTATTATTTGCCATTTTCCCTCATCTTGTATGGTGCCTAAAAAAT
right  ACTGCAGTCCGCAGTCCGGCCTGGGCAACAGA--GCGAGACTCCGTC-TCAAAAAAAAAAAAAAA*AAAAA-
      111111111111111111111111***1*1***1*1111111***1*111***1**1**1111*111111111******1

left  AGATGCTCCCAGCACTTTGGGAGGCCGAGGCGGGTGGATCATGAGGTCAGGAGATCGAGACCATCC
chrom AGATGCTAAAAATATTTATTGAAAAAAGGAAAGAATAGAAAAATGAGATGAGG-----GA-----
right AGATGCTAAAAATATTTATTGAAAAAAGGAAAGAATAGAAAAATGAGATGAGG-----GA-----
      *****222*2222*2*2*2*2222*2222*22*2**22*****2*2***22222**22222222
```

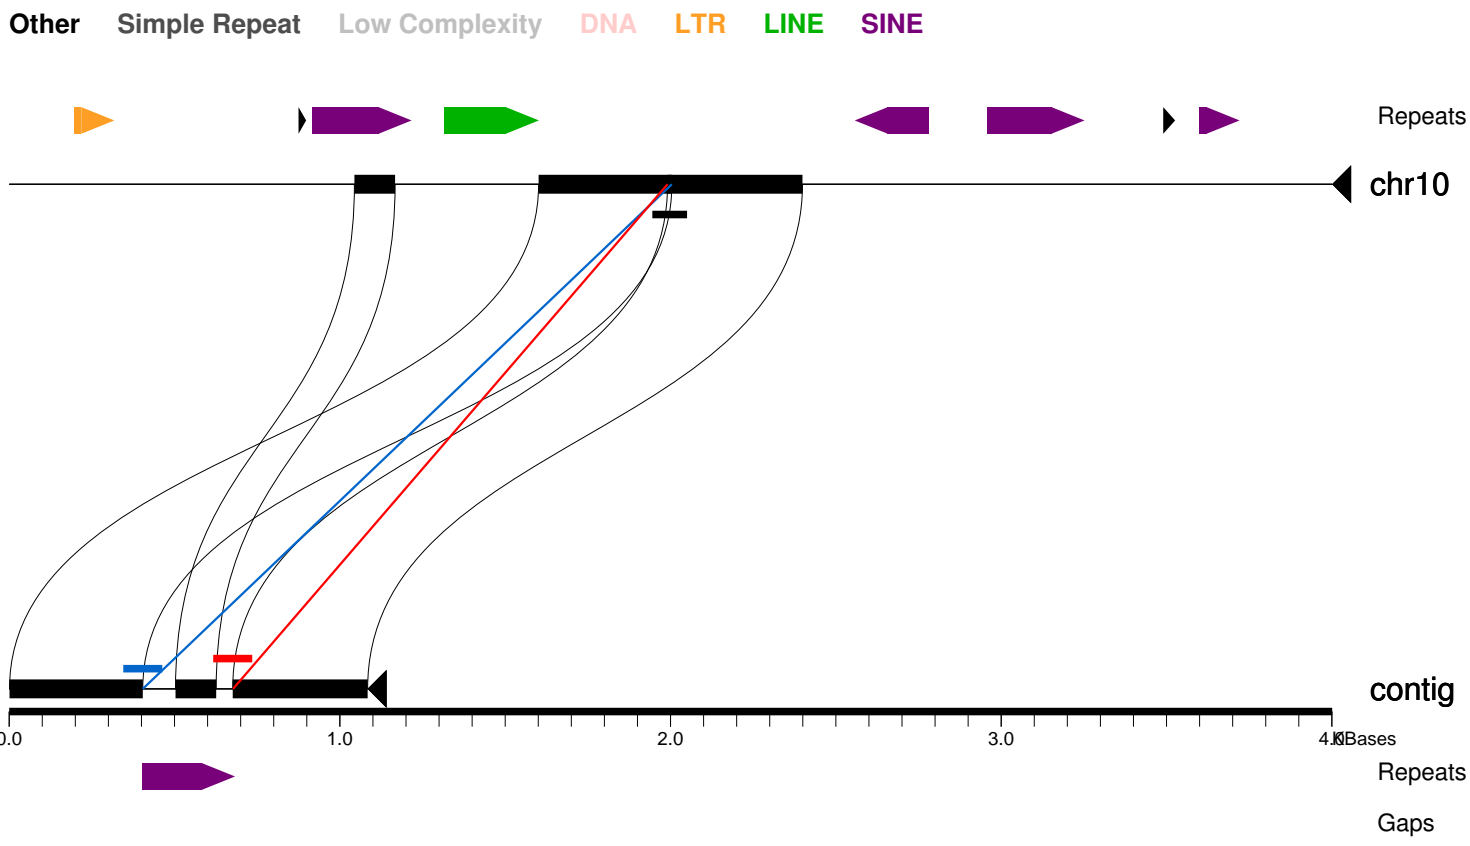





siteID: chr10\_66837072 Scafftig3 + Breakpoint: chr10:66837055

chr10:66837010-66837114

Overlap Length: 15 INS size: 298 Genotyped: Yes

```
left  C-----ATTGATTTACA---TGTAGTTAATATAC-----AATCACTTTCATTAAATTTCAATGAGTTT
chrom C-----ATTGATTTACA---TGTAGTTAATATAC-----AATCACTTTCATTAAATTTCAATGAGTTT
right CGCCCGCCTCGGCCTCCCAAAGTGCTGGGATTACAGGCGTGAGCCACCGCGCCCGGCCCTCAATGAGTTT
      *11111111*11*11*11**111**11*11*1**1*111111*11***1111111111111*****
```

```
left  TTTTTTTTTTTTTTTTTTTTTTGAGACGGAGTCTCGC-TCTATCGCCAGGCTGGAGTGCAGTGGC
chrom TTTTACACATATATA---CAGCCATGTAATCCATCATCTAT-----ATCAAGT----TATA
right TTTTACACATATATA---CAGCCATGTAATCCATCATCTAT-----ATCAAGT----TATA
      ***22222*2*2*222222*22*2*2*2**222*2*****222222222*22***2222*222
```

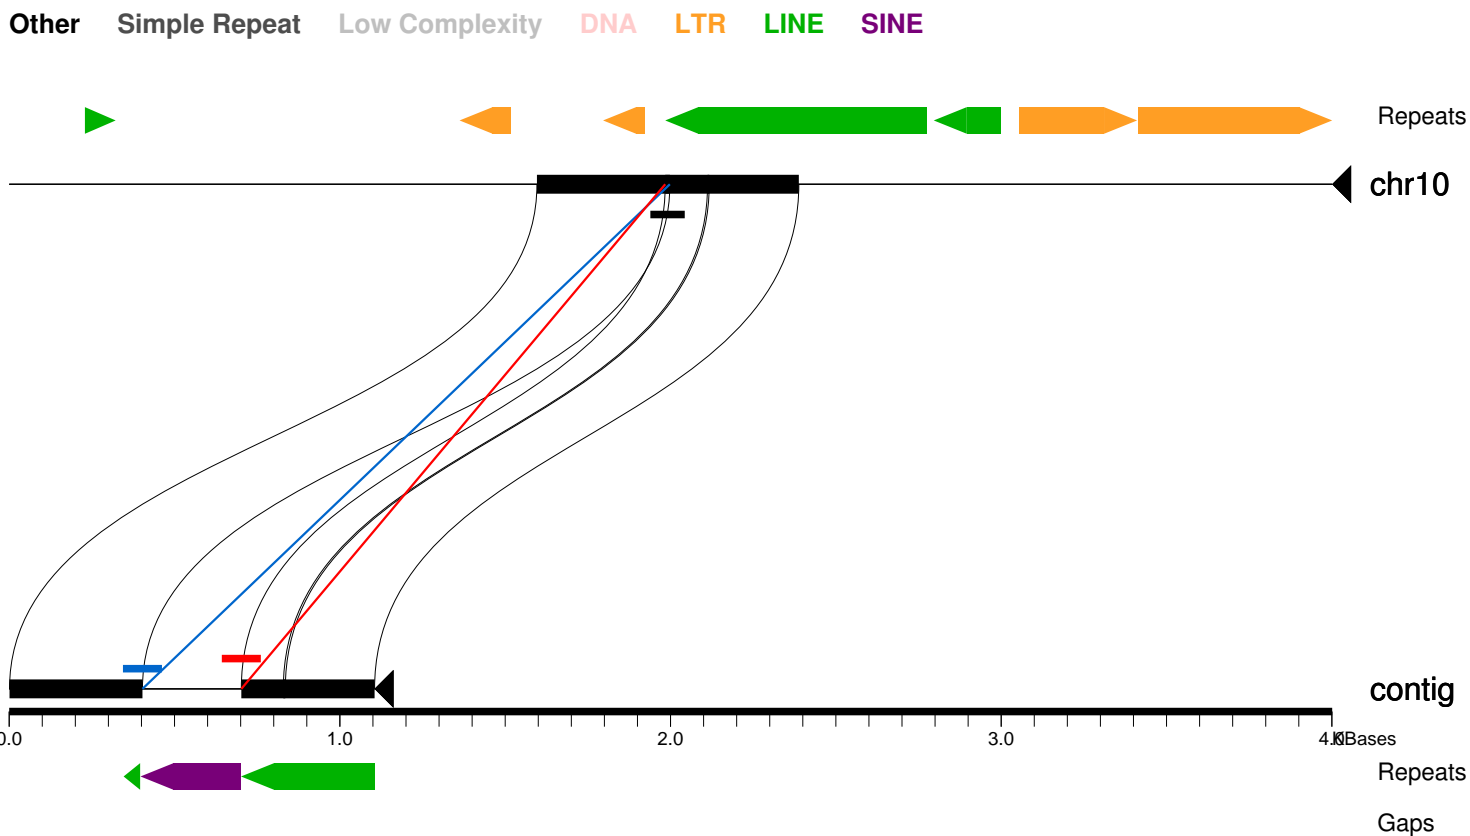







siteID: chr10\_68049101 Scafftig3 - Breakpoint: chr10:68049106

chr10:68049047-68049166

Overlap Length: 0 INS size: 247 Genotyped: Yes

```
left TAAGATTTTTTAAAGAACAGGCCAGGCCAGGCCGTTGGTG----GCTCATGCCTGTAATCCCAGCACTTTGGGAGACT
chrom TAAGATTTTTTAAAGAACAGGCCAGGCCAGGCCGTTGGTG----GCTCATGCCTGTAATCCCAGCACTTTGCAA-ACA
right CGACATCATGCCATTGCACTCCAGCCTGGGTGAAAAAGAGAAAGACTCCA-TCTCAAAATA----AA-ACA
      11*1**11*111*111**11****1*11****1111*111*1*1**11*1**1**11*11111112*2**2
```

```
left GAGGAGGGCAGATCACCTGAGGTCTGGAGTT--TGAGGCTAGCCTGGCCAA-CACG-
chrom AACAAAGAA-AGATTTT-TAAAGAATAAATTTATTTTTTCTGTATTTGATATTCATTT
right AACAAAGAA-AGATTTT-TAAAGAATAAATTTATTTTTTCTGTATTTGATATTCATTT
      2*22**222****2222*2*2*22*22*2**22*2222**2222*2*22*22**222
```

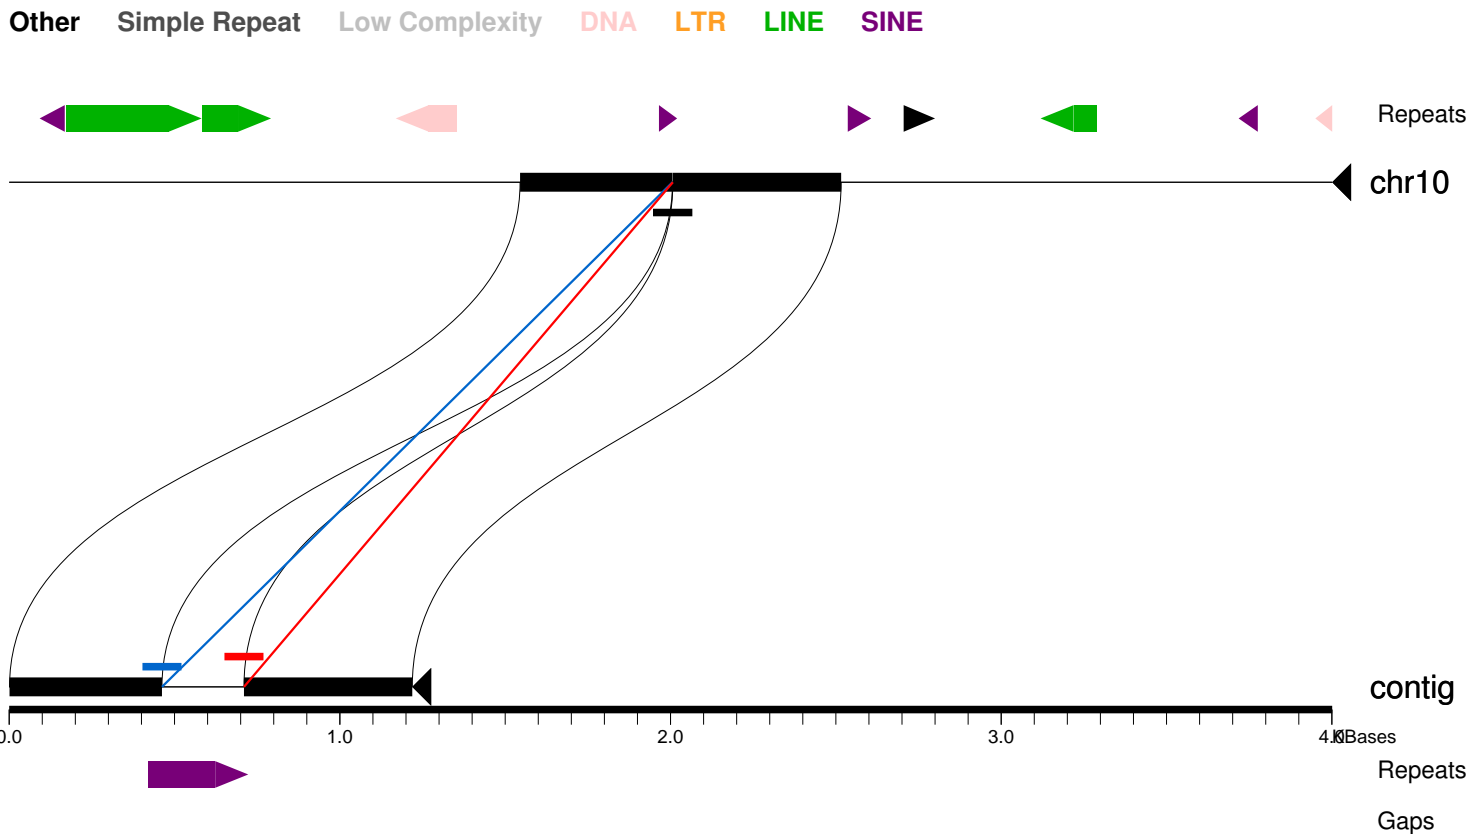



siteID: chr10\_68336753 Scafftig6 + Breakpoint: chr10:68336759

chr10:68336710-68336818

Overlap Length: 11 INS size: 435 Genotyped: No

```
left  GTGTATA---AGCGTTCCCTTTTCTCTG-----CAG-CTTAAACAGCATCTGTTGTTTCTTAACTTTTT
chrom GTGTATA---AGCGTTCCCTTTTCTCTG-----CAG-CTTAAACAGCATCTGTTGTTTCTTAACTTTTT
right CCACCCACCTCGGCCTCCCAAAGTGCTGGGATTACAGGCGTGAGCCACCGCGCCCGGCCCTTAACTTTTT
      111111*1111*111****111111***111111***1*1*1*1*11*11*1111*111*****
```

```
left  TTNNNNNNNNNNNNNNNNNNNNNNNNNNNNNNNNNNNNNNNNNNNNNNNNNNNNNNNNNNNNNNNNNNNN
chrom -----AATAATAGCTATTCTGACTGATGTGAGATAGTATCTCATAGTTTGAAAT
right -----AATAATAGCTATTCTGACTGATGTGAGATAGTATCTCATAGTTTGAAAT
      22222222222222222222222222222222222222222222222222222222222222222222
```

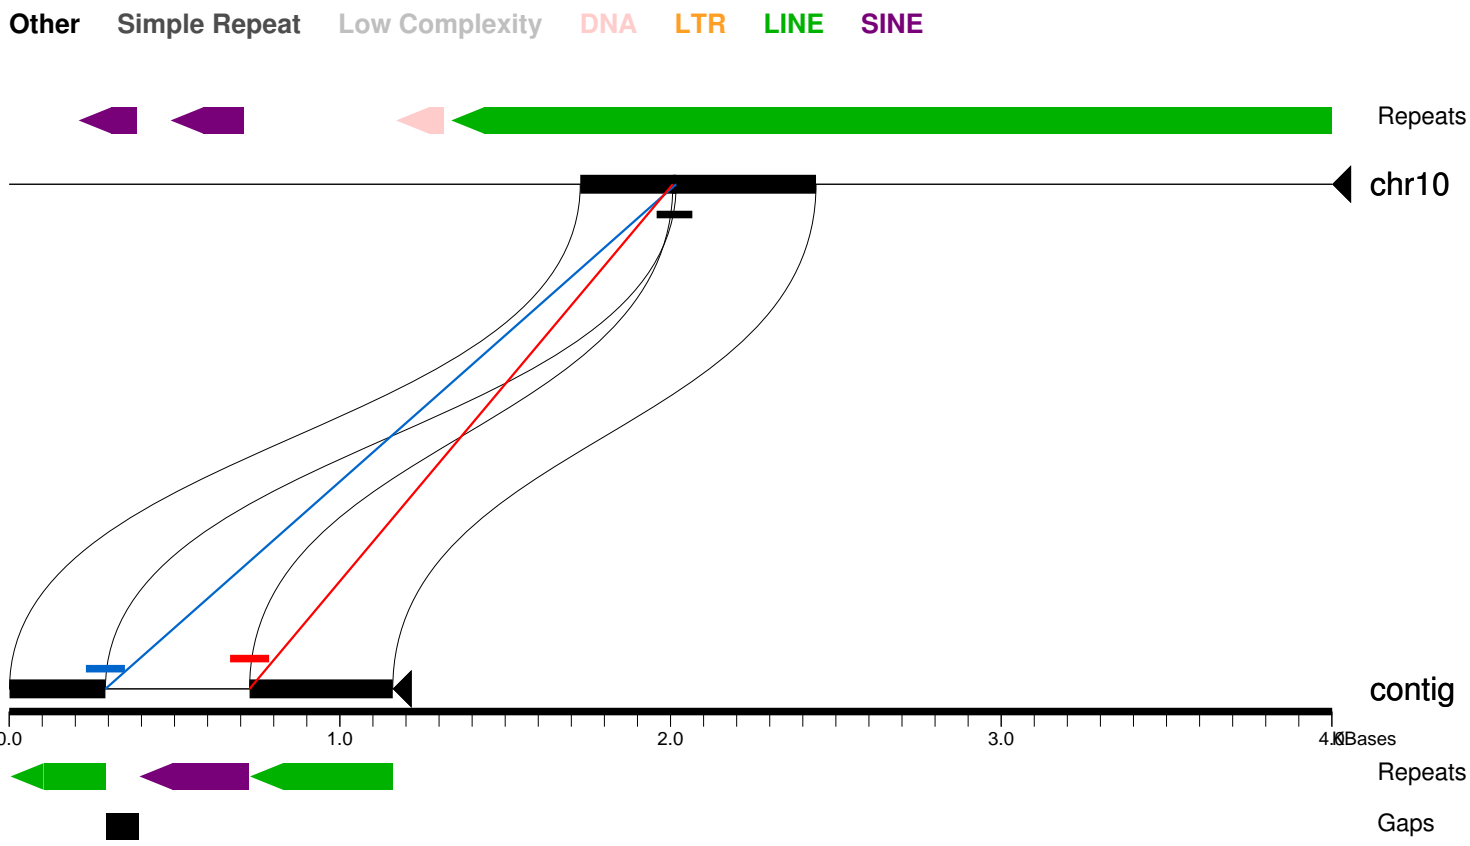



siteID: chr10\_69138224 Scafftig4 + Breakpoint: chr10:69138283

chr10:69138237-69138342

Overlap Length: 14 INS size: 300 Genotyped: Yes

```
left  TTATTCGTGTTTCAGGGTCCAATCAAAGATG---TTA-----TGAAACATTTTGT-----GGTCATCTT
chrom TTATTCGTGTTTCAGGGTCCAATCAAAGATG---TTA-----TGAAACATTTTGT-----GGTCATCTT
right CCGCCC-GCCTCGGCCTCCCAA-AGTGCTGGGATTACAGGCGTGAGCCACCGCGCCCGGCCGGTCATCTT
      11111*1*11*1*11***1*11*11*1**111***111111***11*1111*1111111*****
```

```
left  CTTTFTTTTTTTTTTTTTTTTTTTTTTTGAGACGGAGTCTTGCTCTGTTCGCCAGGCTGGAGTGCAGT
chrom CTTTFTGTCCTCAGATCTGT-----GAGAATT---CTGT-GAGAAAGACAGTCTCCATC
right CTTTFTGTCCTCAGATCTGT-----GAGAATT---CTGT-GAGAAAGACAGTCTCCATC
      ****2*2*22*222*2*2*22222222***22**222****2*222*2*222*22*2**22
```

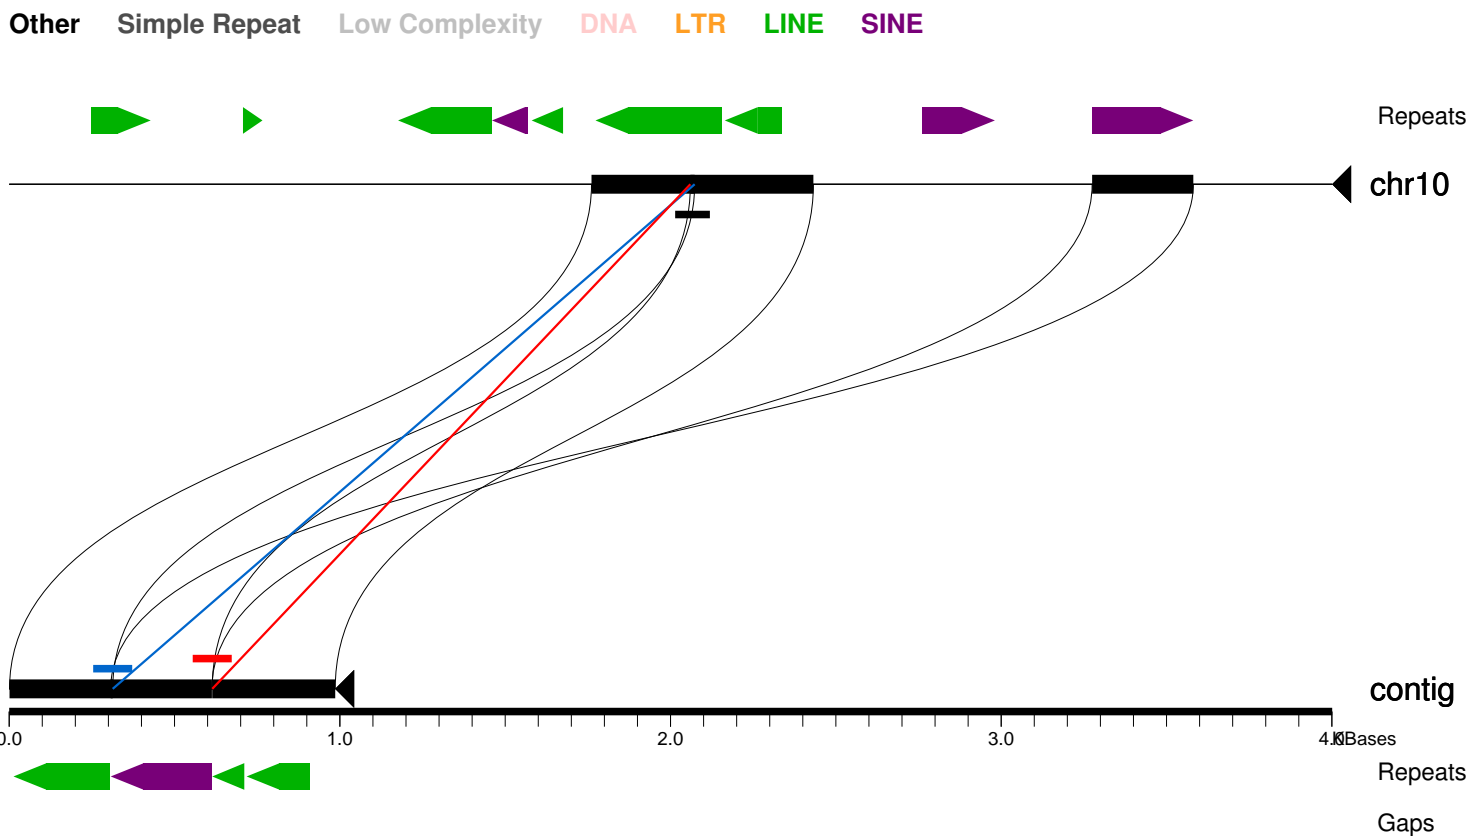



siteID: chr10\_71610160 Scaffitg7 - Breakpoint: chr10:71610164

chr10:71610004-71610335

Overlap Length: 12 INS size: 301 Genotyped: Yes

```
left -----ACAGTACGATACAGAGCAAAAGGCAGATTCTGGACTCCACAAGATCTGGGTTCAAATCC
chrom GACTGTGCGACACAGTACGATACAGGGCAAAAGGCAGATTCTGGACTCCACAAGATCTGGGTTCAAATCC
right AGGCAGGAGA-ATGGCATGAACCCGGG----AGGCGGAGCTTGCAGT-----GAGCCGAG-----ATCC
NNNNNN2N22 *11*1*1**11*1*2*1111****1**111**1*1*111111**1*1*1*11111****
```

```
left CAGCTCTGGCATCAAGAAGCTTCAGGAAGTTGGGTTCTTTCAAAGCCTCGGCCCTGTCTCTAGTGGGATG
chrom CAGCTCTGGCATCAAGAAGCTTCAGGAAGTTGGGTTCTTTCAAAGCCTCGGCCCTGTCTCTAGTGGGATG
right CGCCACTG-CA-----CTCCAGCC---TGGGCGA---CAGAGCGA-GACTCCGTCTCAAAAAAAAAA
*11*1***1**11111111**1***11111****111111**1***111*1*1*1*****1*11111*11
```

```
left AGGATAACAATCCTCTTTAAGAGACATCAGGAGCCGGGCGCGGTGGCTCACGCCTGTAATCCCAGCACTTT
chrom AGGATAACAATCCTCTTTAAGAGACATCAGGAGA-GGACCTGGAGCCACACGT-TAAACTGCCTGG-CATG
right AAAAAAAAAA-----AAAGACATCAGGAGA-GGACCTGGAGCCACACGT-TAAACTGCCTGG-CATG
*11*1*1**1**11111111*1*****22**2*22**2*2*2***22*22*2*2**2*2*2
```

```
left GGGAGGC---CGAGGCGGGCGGAT-----CACGAGTCTCAGGAG----ATCGAGA--CCATCC--CGGCTA
chrom GGGTGACACTCGAGAAAAGAGGGTTTCTTACCCCATGGCACATGTCTAATGCAGGGGGCCTTCCAGCGGCCT
right GGGTGACACTCGAGAAACAGGGTTTCTTACCCCATGGCGCATGTCTAATGCAGGGGGCCTTCCAGCGGCCT
***2*2*222****222122**2*22222*2*2*2*2*1222*2222**22**222**2***22****22
```

```
left AAACGGT-----GAAACCC-----GTCTCTACTAAA-----A
chrom CCTGCGTCTGGAGGAAGCCACCTACTGAGAGGTCTCTGCCAGCCTGCTCAGGGTA
right CCTGCGTCTGGAGGAAGCCACCTACTGAGAGGTCTCTGCCAGC-----
22222**222222**2**2*222222222*****2*2*222 1
```

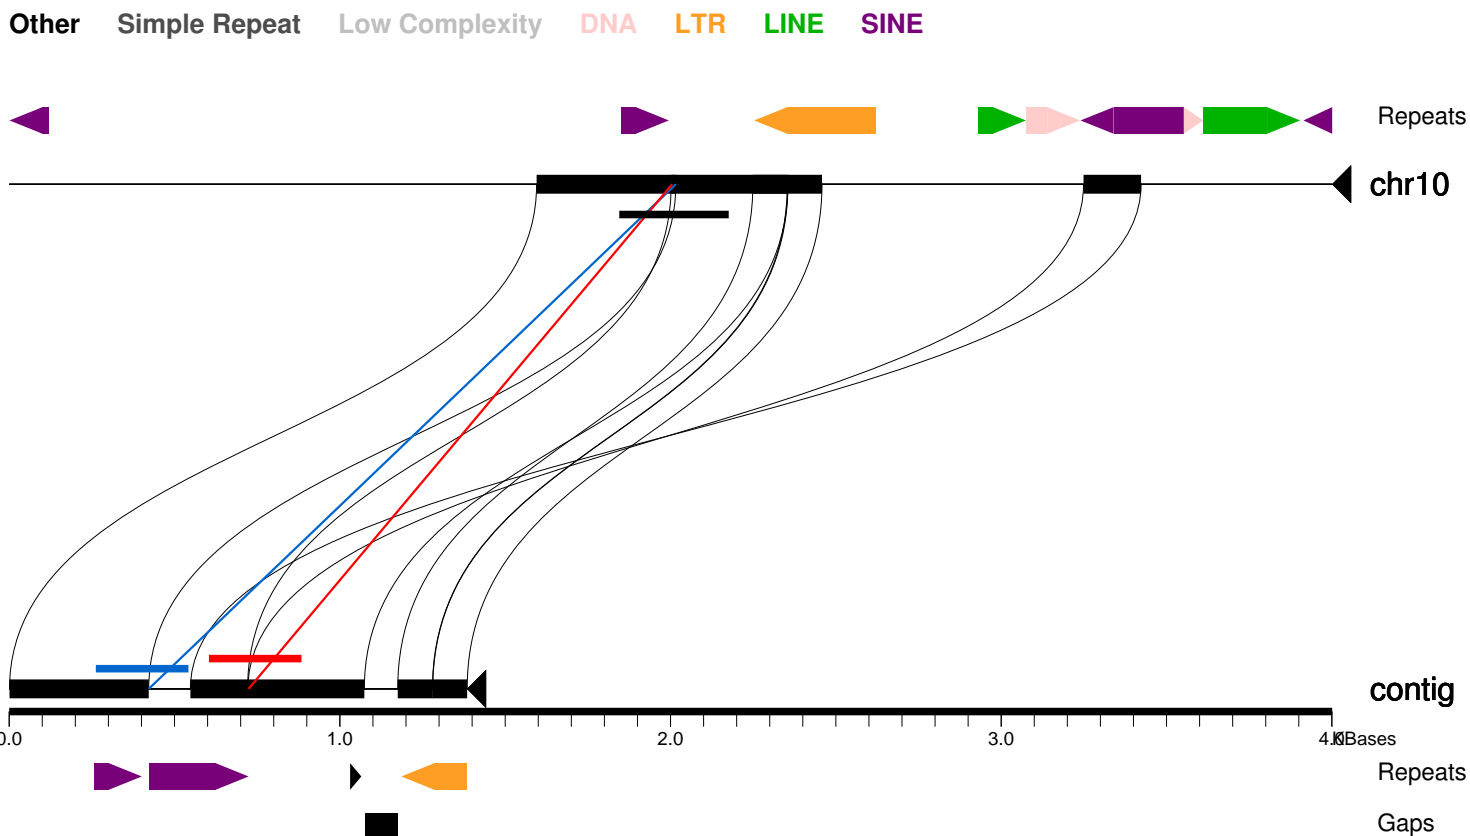







siteID: chr10\_83333145 Scaffitg1 - Breakpoint: chr10:83333091

chr10:83333044-83333150

Overlap Length: 13 INS size: 300 Genotyped: Yes

```
left  TCT----CATCATCAAGTCAAACAC----AAAAACAGCTTCTAATCAACATTTTA----GCAACTCACTC
chrom TCT----CATCATCAAGTCAAACAC----AAAAACAGCTTCTAATCAACATTTTA----GCAACTCACTC
right CCACCCGCCTCGGCCTCCCAAAGTGCTGGGATTACAGGCGTGAGCCACCGCGCCCGGCCGCAACTCACTC
      1*11111*1**11*1111****11111111*11****11111*11**1*1111111111*****
```

```
left  TTTTTTTTTTTTTTGAGACGGAGTCTCGCTCTGTCGCCAGGCCGGACTGCGGACTGCAGT
chrom TTAAGCTGT-----ACGATTAAATGCAATGG----AATATCTGATGAAAGCCTACAA-
right TTAAGCTGT-----ACGATTAAATGCAATGG----AATATCTGATGAAAGCCTACAA-
      **22222*2*2222222***2222222**22**222222*222*2**22222*2**2**22
```

Other Simple Repeat Low Complexity DNA LTR LINE SINE

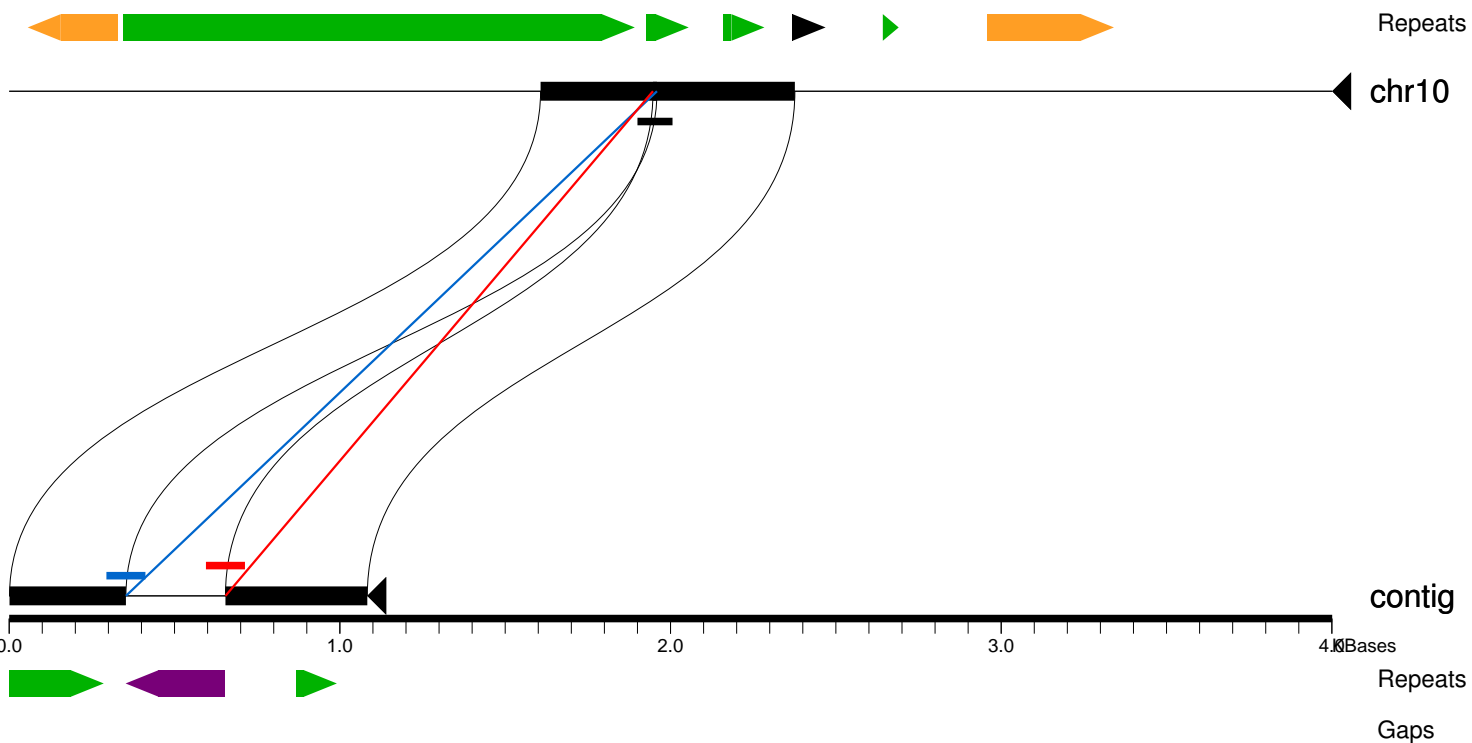

siteID: chr10\_85983262 Scafftig3 + Breakpoint: chr10:85983244

chr10:85983200-85983303

Overlap Length: 15 INS size: 293 Genotyped: Yes

```
left  A--CCAATAAGGTATTATCAAAA-----CAATACAGAA-TGTGAAAATTCAG-----TTAATTGGGTA
chrom A--CCAATAAGGTATTATCAAAA-----CAATACAGAA-TGTGAAAATTCAG-----TTAATTGGGTA
right CCGCCCGCCTCGGCCTCCCAAAGTGCTGGGATTACAGGCGTGAGCCACCGCGCCCGGCCTTAATTGGGTA
      111**111111*111*11****11111111*1*****111**1*11*111*11111111******
```

```
left  TTTTTTTTTTTTTTTTGAGACGGAGTCTCGCTCTGTCGCCCAGGCTGGAGTGCAG-TGGCGGGAT
chrom TTTT-----TAAACCATCCAGAGTTT-----TGTC-----ATAATGTATAACAAATACCTGGGC
right TTTT-----TAAACCATCCAGAGTTT-----TGTC-----ATAATGTATAACAAATACCTGGGC
      ***2222222*22222*22*2****2*22222*****2222*222**2*222**22*22*2**22
```

Other Simple Repeat Low Complexity DNA LTR LINE SINE

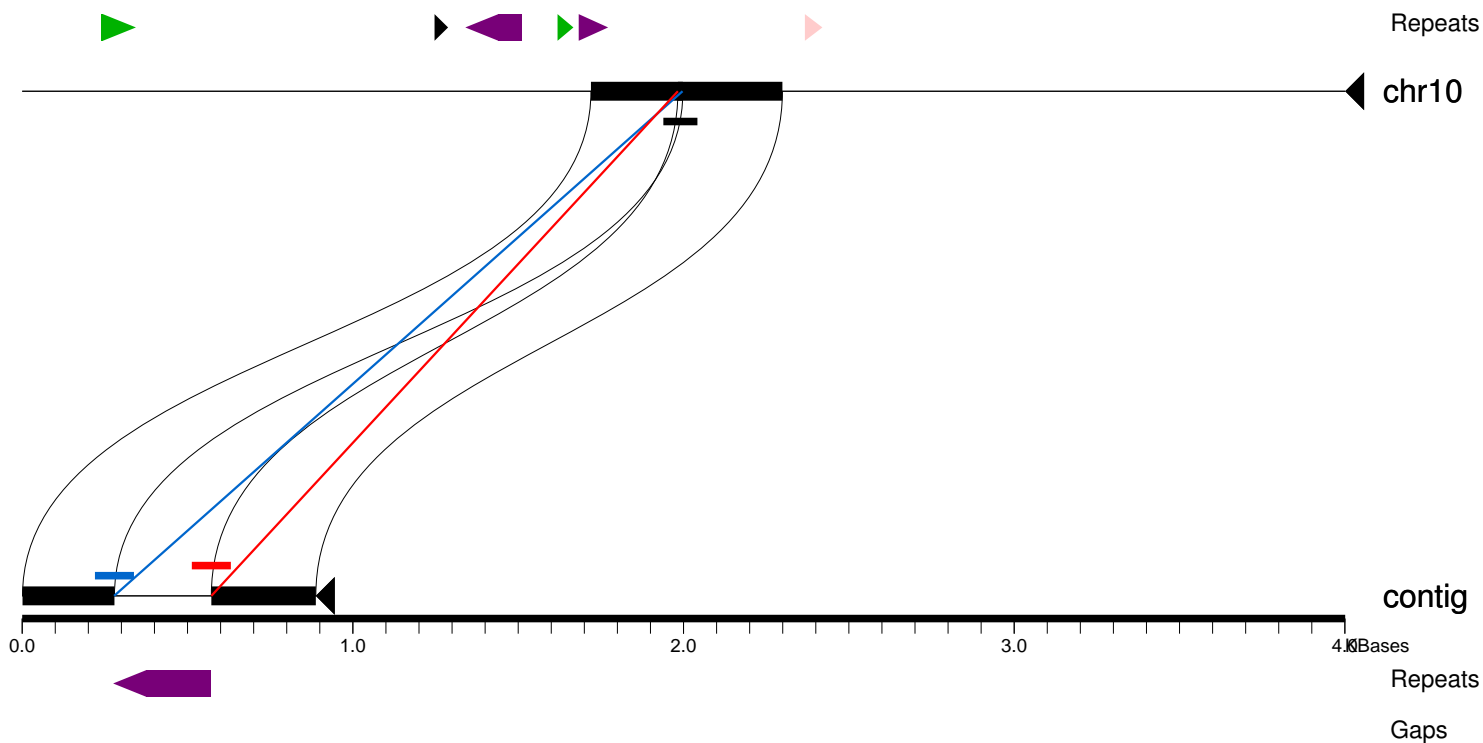

siteID: chr10\_87963313 Scaffoldig3 + Breakpoint: chr10:87963292

chr10:87963247-87963351

Overlap Length: 15 INS size: 293 Genotyped: Yes

```
left -----GCTGGGCATGAGGGGAAAGC-----CAGGACGAGCACTGGGCACCGGGTTAAAAATTTTACA
chrom -----GCTGGGCATGAGGGGAAAGC-----CAGGACGAGCACTGGGCACCGGGTTAAAAATTTTACA
right ACTCCAGCCTGGGCGACAGAGCGAGACTCCCGTCTCAAAAAAAAAAAAAAAAAAAAAAAAAAAAAAAATAAAATTTTACA
111111111*****111**1*11*11*11111111**11*11*11*1111111*1111111******
```

```
left GAAACTCACGCCTGTAATCCCAGCACTTTGGGAGGCCGAGGCGGGTGGATCACGAGGTCAGGA
chrom GAAAATG-----TGTAGAGGCAG-----AAACCAAGCCTCAATGCTTGTTCATATCAGGA
right GAAAATG-----TGTAGAGGCAG-----AAACCAAGCCTCAATGCTTGTTCATATCAGGA
***2*222222****2222***222222222*22**2**2*22222*2*2222*22*****
```

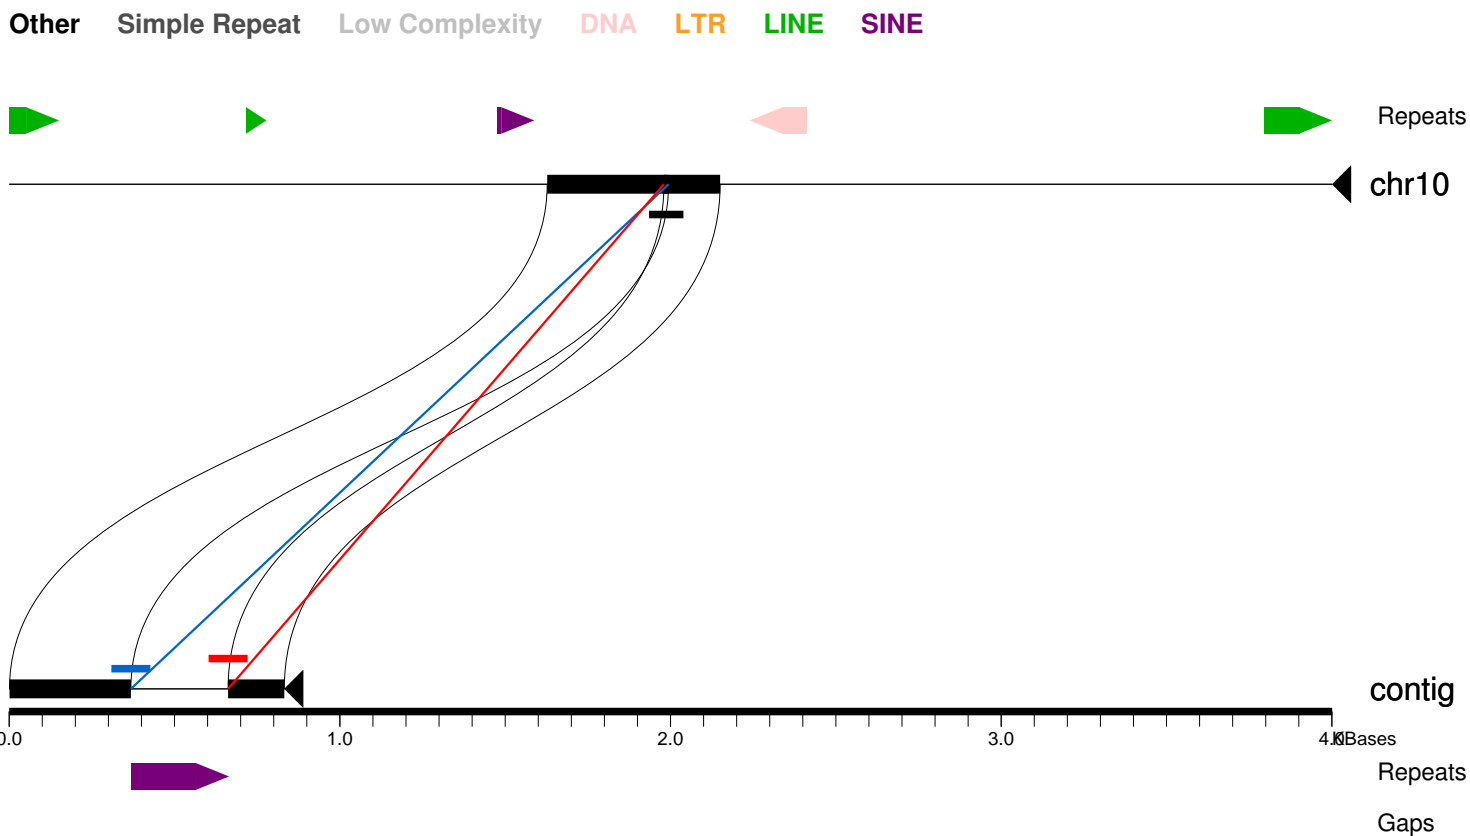



siteID: chr10\_92215071 Scafftig6 + Breakpoint: chr10:92215057

chr10:92215013-92215116

Overlap Length: 16 INS size: 297 Genotyped: Yes

```
left  GTTGGCTT-----TGCATATGCTTCTTTTGAAAAGTGT-----CTGTTTCATGT----CCTTTGTCCAT
chrom GTTGGCTT-----TGCATATGCTTCTTTTGAAAAGTGT-----CTGTTTCATGT----CCTTTGTCCAT
right GCCCGCCTCGGCCTCCCAAAGTGCTGGGATTACAGGCGTGAGCCACCGCGCCCGCCTACCTTTGTCCAT
      *111**1*11111*1*11*1**11*1111*1*1*1*1**111111*1*11*11*11111*****
```

```
left  TTTTTTTTTTTTTTTTTTTGGAGACGGAGTCTCGCTCTGTTCGCCAGGCTGGAGTGCAGTGGCGC
chrom TTTTAAATGGGATTGTTTGGT-----TTTGTCT-TGTT----AATCTG--TTGAAGTTTCA-
right TTTTAAATGGGATTGTTTGGT-----TTTGTCT-TGTT----AATCTG--TTGAAGTTTCA-
      ****22*2222**2***2*22222222*2*2***2***22222*22***222**2***22*22
```

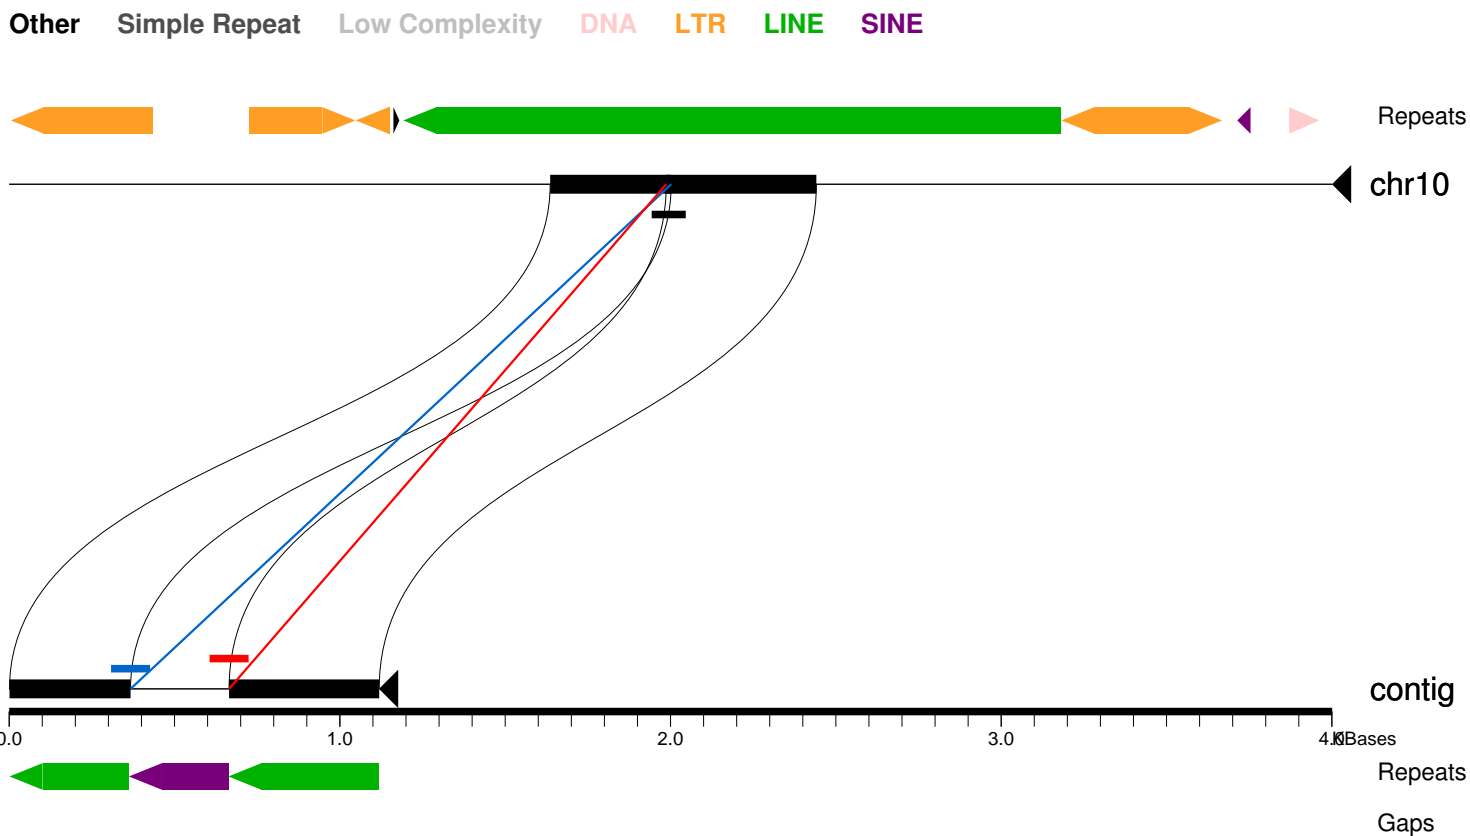







siteID: chr10\_9510979 Scaffitg4 + Breakpoint: chr10:9510982

chr10:9510822-9511154

Overlap Length: 13 INS size: 301 Genotyped: Yes

```
left T-----ATTCACACACTAAATATCTGTTTACAATTCACATGCAGTGTGTACTGACCACACATTGATTTT
chrom TGACAATATTCACACACTAAATATCTGTTTACAATTCACATGCAGTGTGTACTGACCACACATTGATTTT
right T-----TT-----AGTAGAGACGGGGTTTCA---CCGTTTTAGCCGGGATGGTC-----TCGATCT-
* 1**11111*1**1*1*111*1**1**111*111*11**111*1*11*1*111111*1***1*1
```

```
left TCCTAATACATTTTGAACAAATATAAGTGAATTCCTATTTGAATATATACATATAAAAATAAAAATATGAAG
chrom TCCTAATACATTTTGAACAAATATAAGTGAATTCCTATTTGAATATATACATATAAAAATAAAAATATGAAG
right -CCTGA--CCTCGTGATCCGCCCGCCTCGGCCTCCCA-----AAGTGC---TGGGATTACAGGCGTGA
1**1*11*1*11**1*1111111111*111**1*1111111*11*1*111*111**1*1*111*111
```

```
left GCCCTTGATGGCATAACGAGGTGCAAATTTTTTT-----TTTTTTTTTTTTTTTTTTGA-----GA
chrom GCCCTTGATAGCATAACGAGGTGCAAATTTTTTTAAAGTGGAGTATTTTATGTTTGAATATAGAACTAAAGT
right GCC---ACCGCGCCCGCCCGCCTGCAAATTTTTTTAAAGTGGAGTATTTTATGTTTGAATATAGAACTAAAGT
**1111*1N*111*111*111*****2222222*2***2*2***222*2*2**222222*2
```

```
left CGGAGTCTC-----GCTCTGTCGCCAGG-----CTGGAGTGCAGTGGCGGGATCTCGGCTCA
chrom AGAAGTTTCAGGGTTAGTTTTTTAAAAAAGTAAAAATTTTAACTGAAAAGTCAGCCATTTTCTTTAAAAACA
right AGAAGTTTCAGGGTTAGTTTTTTAAAAAAGTAAAAATTTTAACTGAAAAGTCAGCCATTTTCTTTAAAAACA
2*2***2*2222222*2*2*22222*2222222222***2*222***22222222*2*22222**
```

```
left CTGCAAGCTCT---GCCTCCCGGTTTCACGCCATT--CTCTG-----
chrom TTTTCAAGTTTAAAGAGATTCAATTTGTTTGA-ATTAGCTGATGAAAAATGCCA
right TTTTCAAGTTTAAAGAGATTCAATTTGTTTGA-ATTAGCTG-----
2*2**222*2*2222*22**2222**222*22**22**2N11
```

Other Simple Repeat Low Complexity DNA LTR LINE SINE

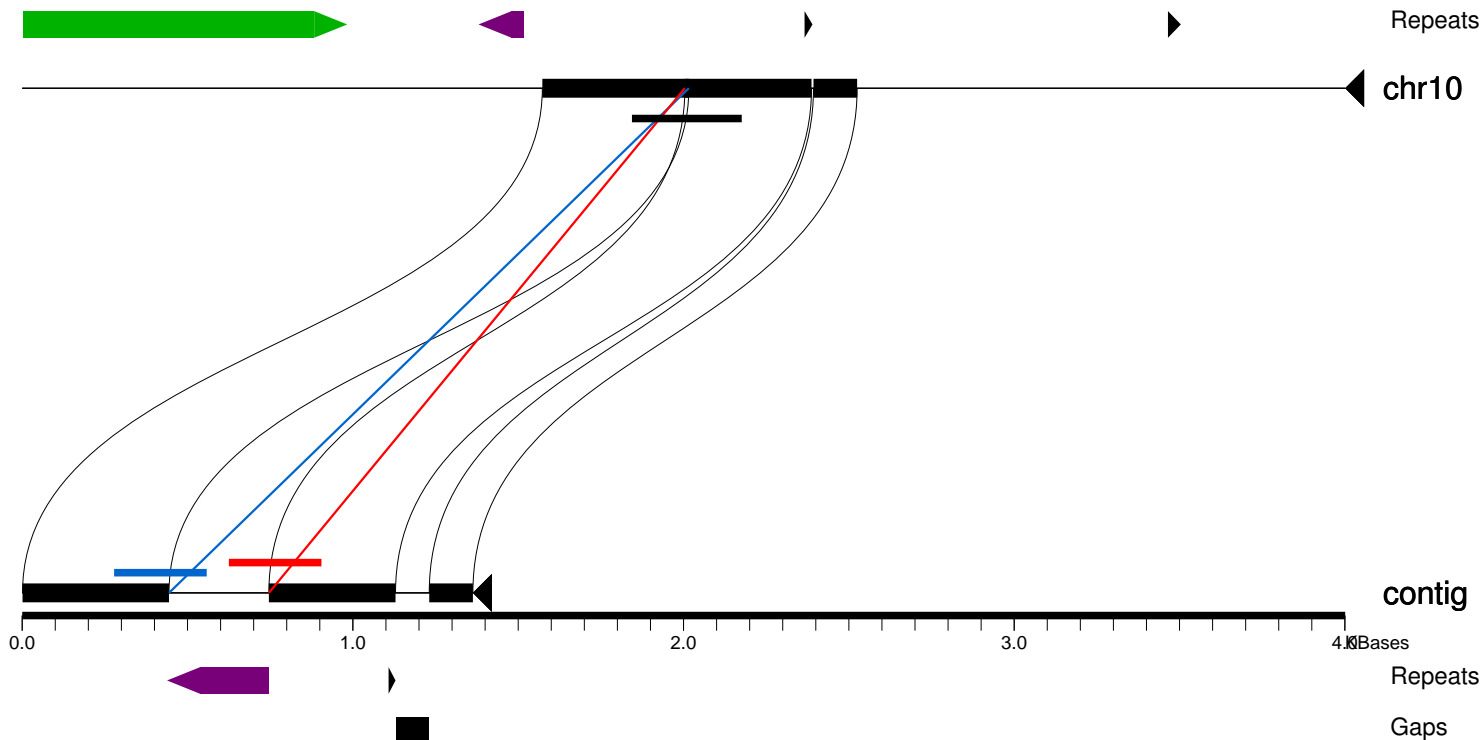

siteID: chr10\_96763985 Scafftig3 + Breakpoint: chr10:96763973

chr10:96763928-96764032

Overlap Length: 15 INS size: 294 Genotyped: Yes

```
left  TATTTTTTCCATCAGTTATTGGGGTAC--AAGTGGT---ATT-----TG-GTTAC--ATGAATAAGT  
chrom TATTTTTTCCATCAGTTATTGGGGTAC--AAGTGGT---ATT-----TG-GTTAC--ATGAATAAGT  
right CCTCGTGATCCGCCGCC-TCGGCCTCCCAAAGTGCTGGGATTACAGGCGTGAGCCACCGATGAATAAGT  
11*11*11***11*1*111*1**11*1*11*****1*111***1111111**1*11**11*****
```

```
left  TCTTTTTTTTTTTTTTTTTTTTTTTTTTTGAGACGGAGTCTCGCTCTGTCGCCAGGCTGGAGTGC  
chrom TCTTTAGTGGTGATTTGTGAGATTTTGGTGCA-----TCCATCACCTGAGCAATA-----  
right TCTTTAGTGGTGATTTGTGAGATTTTGGTGCA-----TCCATCACCTGAGCAATA-----  
****22*22*22***2*2222****2*2*222222222222**22*2**222**222*2222
```

Other Simple Repeat Low Complexity DNA LTR LINE SINE

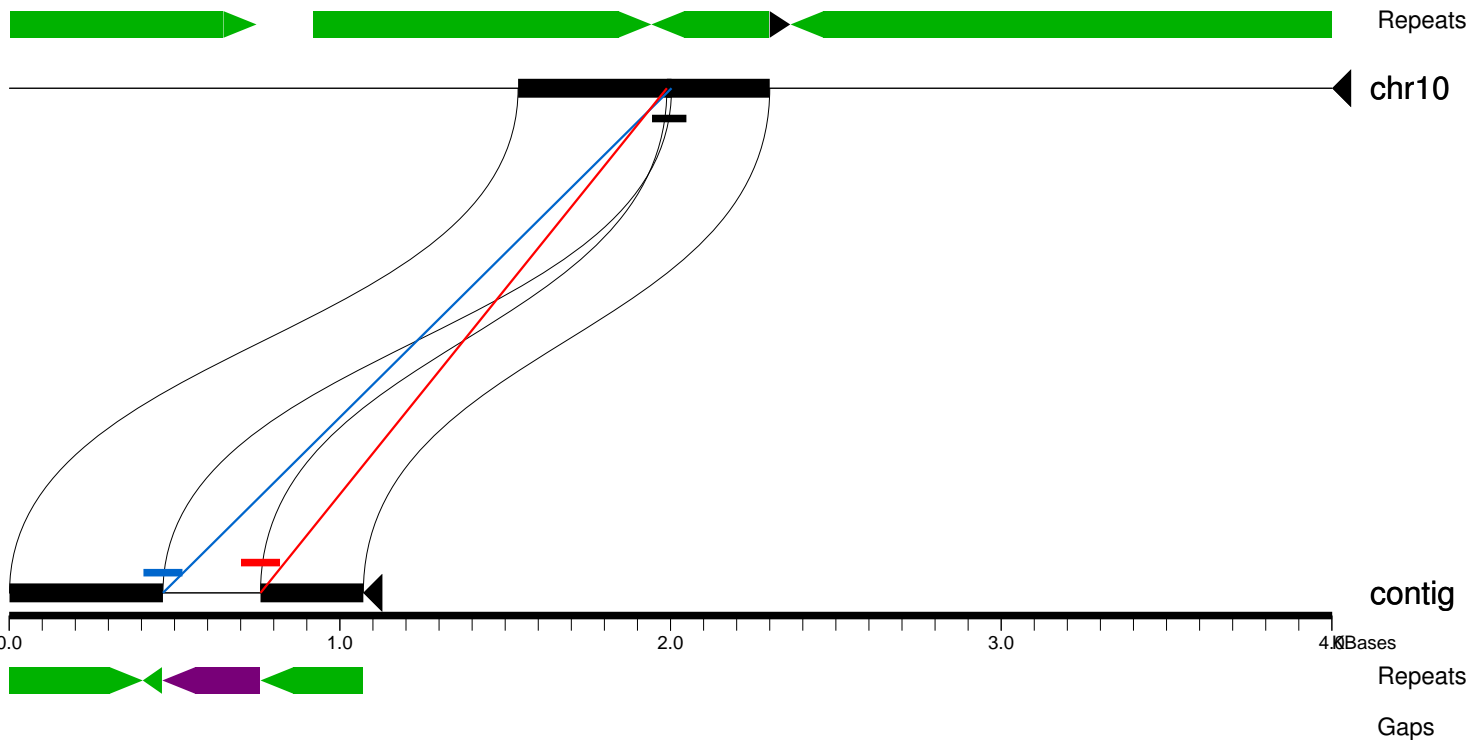

siteID: chr10\_9904419 Scaffoldig1 + Breakpoint: chr10:9904393

chr10:9904348-9904452

Overlap Length: 15 INS size: 291 Genotyped: Yes

```
left  ATGTCTTTCAT-----CAAAGACATGTTATCTA-----ATCTAAGTACTTTTGTAGACTTTTAAAC
chrom ATGTCTTTCAT-----CAAAGACATGTTATCTA-----ATCTAAGTACTTTTGTAGACTTTTAAAC
right CCGCCCGCCTCGGCCTCCCAAAGTGCTGGGA-CTACAGGCGTGAGCCACCGCGCCCGGCCGACTTTTAAAC
      11*1*111*1111111111*****111**11*1***111111111*1*1*111111111*11*****

left  TTTTTTTTTTTTTTTGGAGACGGAGTCTCGCTCTGTCTCGCCAGGCTGGAGTGCAGTGGCGTGATC
chrom TTTTAAACCTAGCAAAAATA-GAAGAAAAGTTTTTTTAATAAAAAAAGAA-----AAT
right TTTTAAACCTAGCAAAAATA-GAAGAAAAGTTTTTTTAATAAAAAAAGAA-----AAT
      ****2222*222222*2*2*2**2222*2*2*2*2222*2222*2*22222222222*22
```

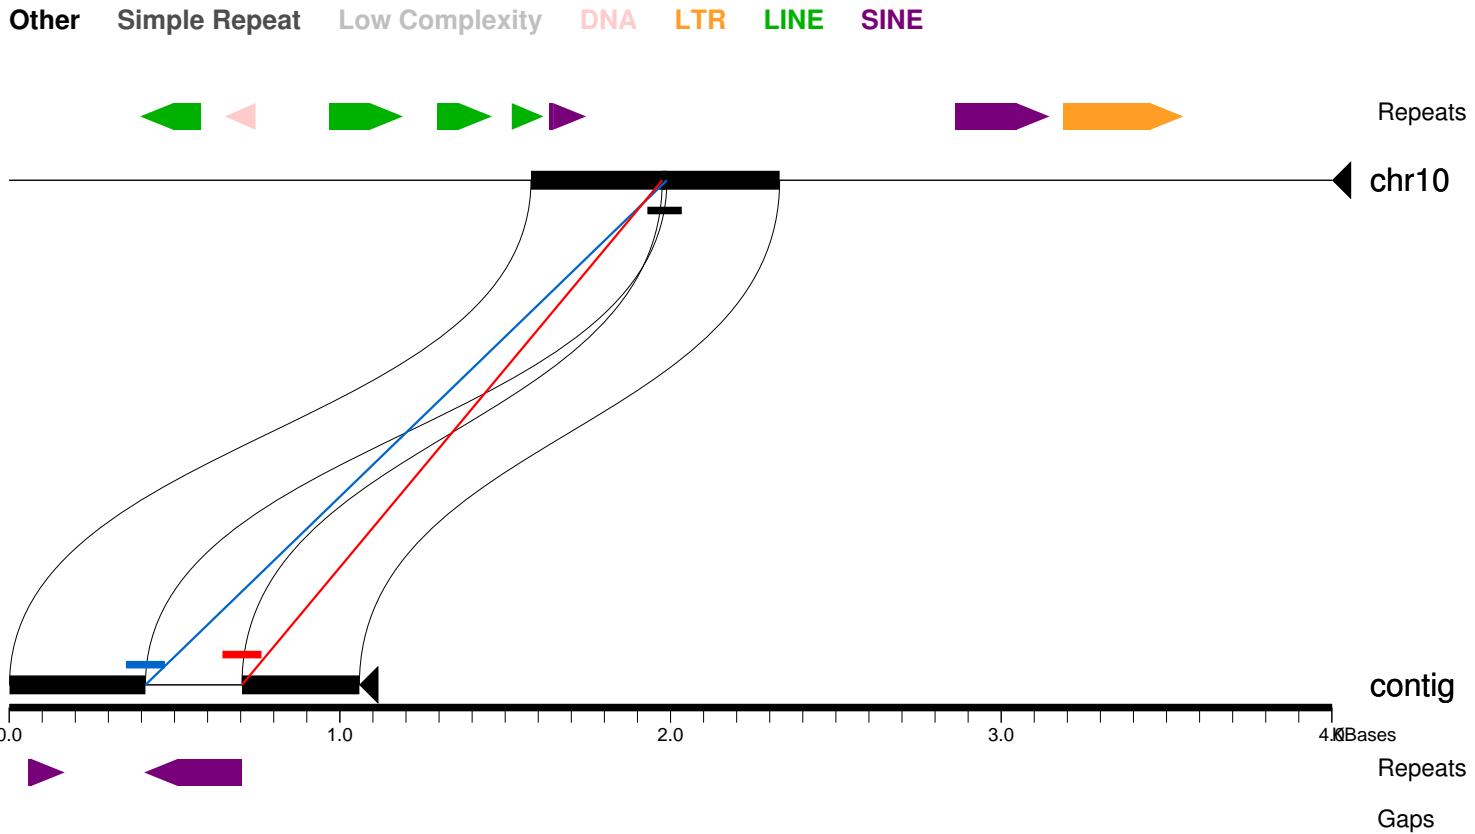



siteID: chr11\_101303519 Scafftig1 - Breakpoint: chr11:101303558  
 chr11:101303499-101303617  
 Overlap Length: 1 INS size: 467 Genotyped: No

```

left  GAAGTCTGTGTTTAAAAAATACATATGTA-TAGGAACACA----TAAAAACATTTTGACTTTAAGACNNNNN
chrom GAAGTCTGTGTTTAAAAAATACATATGTA-TAGGAACACA----TAAAAACATTTTGACTTTAAGACTTCTC
right TCCACCCGCTCGGCC--TCCCAAAGTGCTGGGATTACAGGCGTGAGCCACCGCGCCCG---GCCTTCTC
      11111*1*11*11111111*1*11*1**11*1***11***1111*1*11**1111*1*11111*1*22222

left  NNNNNNNNNNNNNNNNNNNNNNNNNNNNNNNNNNNNNNNNNNNNNNNNNNNNNNNNNNNNNNNNNNNNNNNNN
chrom AGGGTCTTTAAGGTGATCAAGAGTGTGGTGAATCTTCAAGAGGGAGATAAAAGTA
right AGGGTCTTTAAGGTGATCAAGAGTGTGGTGAATCTTCAAGAGGGAGATAAAAGTA
      22222222222222222222222222222222222222222222222222222222222222222222
  
```

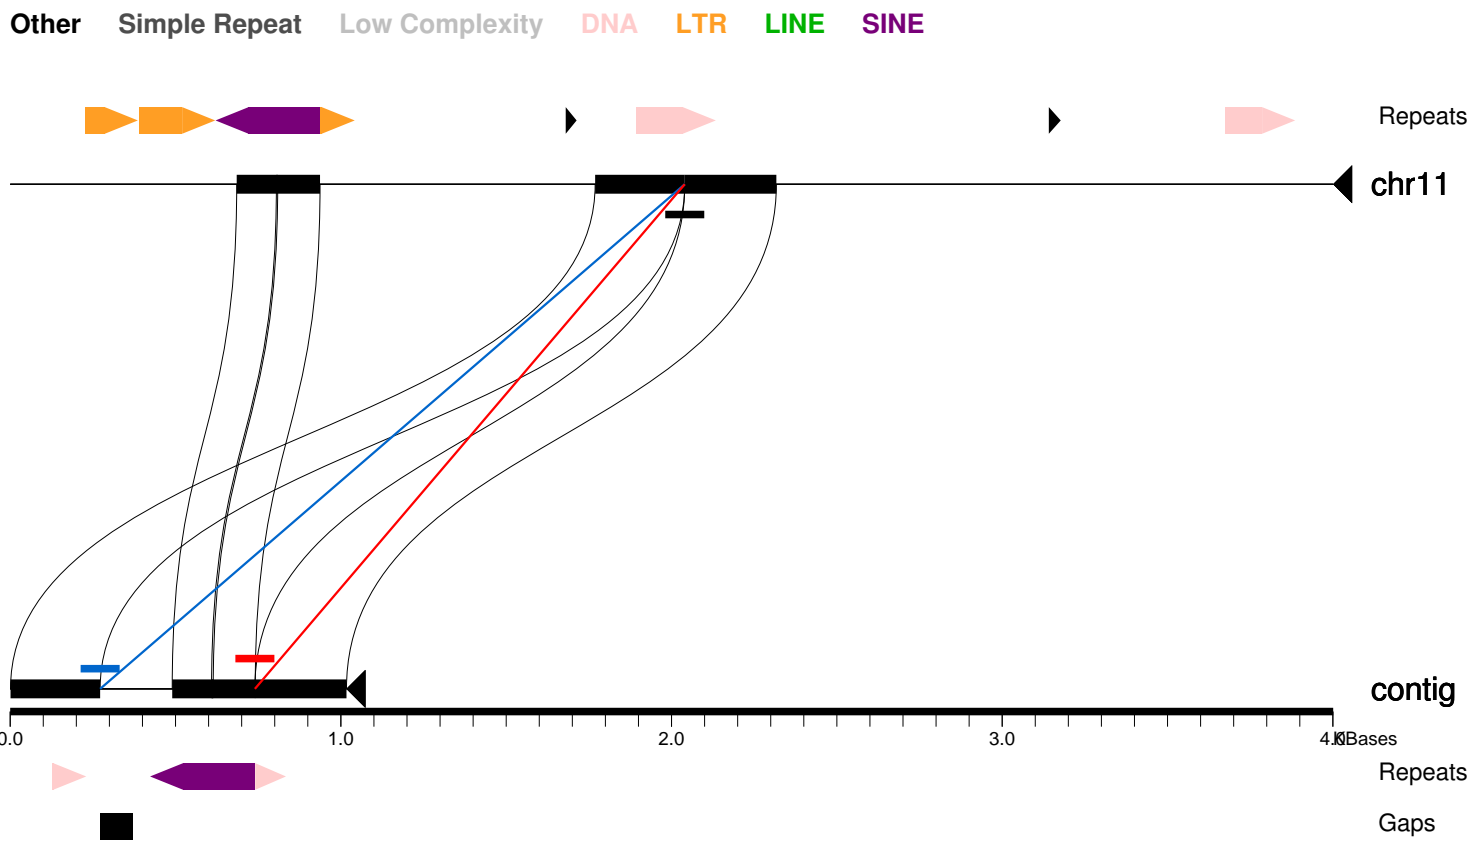

siteID: chr11\_102169755 Scaffitig1 + Breakpoint: chr11:102169754  
chr11:102169695-102169813  
Overlap Length: 1 INS size: 386 Genotyped: No

```
left      C--CCAGG--GATGAAGCTATCTTGA--TCGTGGTGGATGAGCTTTTTGATGTGCTGCTGGATTCANNNN
chrom     C--CCAGG--GATGAAGCTATCTTGA--TCGTGGTGGATGAGCTTTTTGATGTGCTGCTGGATTCAGTTT
right    TAGCCAGGATGGTCTCGATCTCCTGACCTCGTGATCCGCCCGCCTC-----GGCCTCCCAAAGT-AGTTT
         111*****11*1*111*1*1**1**11*****1*111111**1*111111*11**1*111*1*1*2222

left      NNNNNNNNNNNNNNNNNNNNNNNNNNNNNNNNNNNNNNNNNNNNNNNNNNNNNNNNNNNNNNNNNNNNNNNNN
chrom     GCCAGTATTTTATTGAGGATTTTGGATCAATGATCATCAGGGATATTGGTCTAC
right    GCCAGTATTTTATTGAGGATTTTGGATCAATGATCATCAGGGATATTGGTCTAC
         2222222222222222222222222222222222222222222222222222222222222222222222222222
```

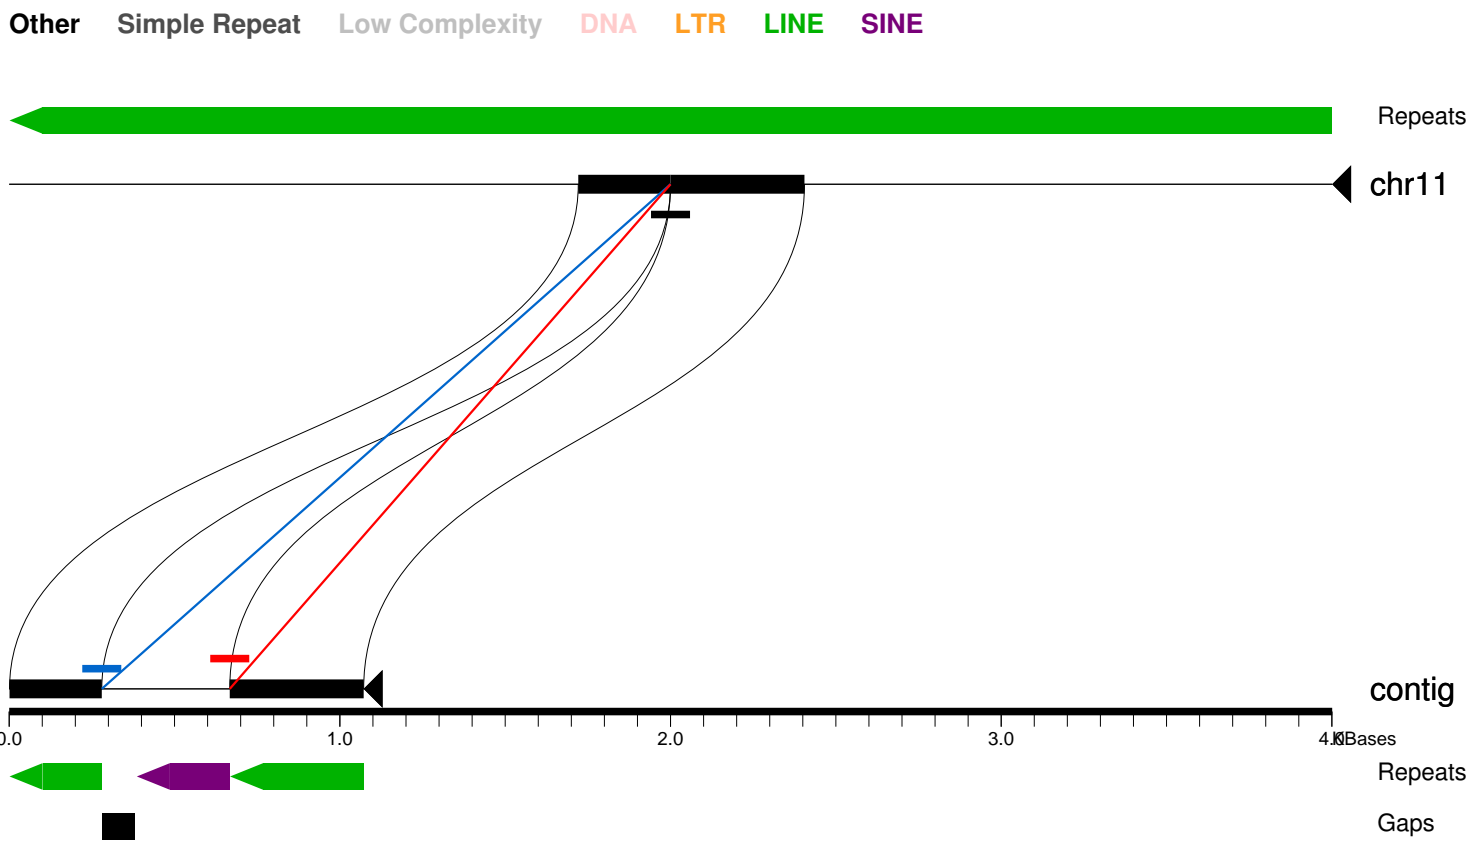

**siteID: chr11\_102348320 Scaffitig4 + Breakpoint: chr11:102348313**  
**chr11:102348267-102348372**  
**Overlap Length: 14 INS size: 208 Genotyped: Yes**

```

left  ACAAAC TTTT --GAAAGG TTCAC TGCAT -TAAAT TCTGA AGCCCTAGGA -----CATGAACAATT
chrom ACAAAC TTTT --GAAAGG TTCAC TGCAT -TAAAT TCTGA AGCCCTAGGA -----CATGAACAATT
right GCCCGC CACTAC GCCCGG CTAAT TTTT TGTAT TTTT TAGTAG AGACGGGG TTTT CACCGTT CATGAACAATT
      1*111*111*11*111**1*1*1*111*1**11**11*1**11111**11111111111******
left  TTTTTTTTTTTTTTTTTTTTTTTTTTTTTT GAGACGGAGTCTCGCTCTGTCTGCCCAGGCTGGAGTGC
chrom TTTTAAATTCTGCCTTGGTT-----AGA---AATCACCCCTGATACAAAGAGGC---AAATC
right TTTTAAATTCTGCCTTGGTT-----AGA---AATCACCCCTGATACAAAGAGGC---AAATC
      **222**2*222**22**2222222***222*2**2*2**2222*2222****222*222*
  
```

Other   Simple Repeat   Low Complexity   DNA   LTR   LINE   SINE

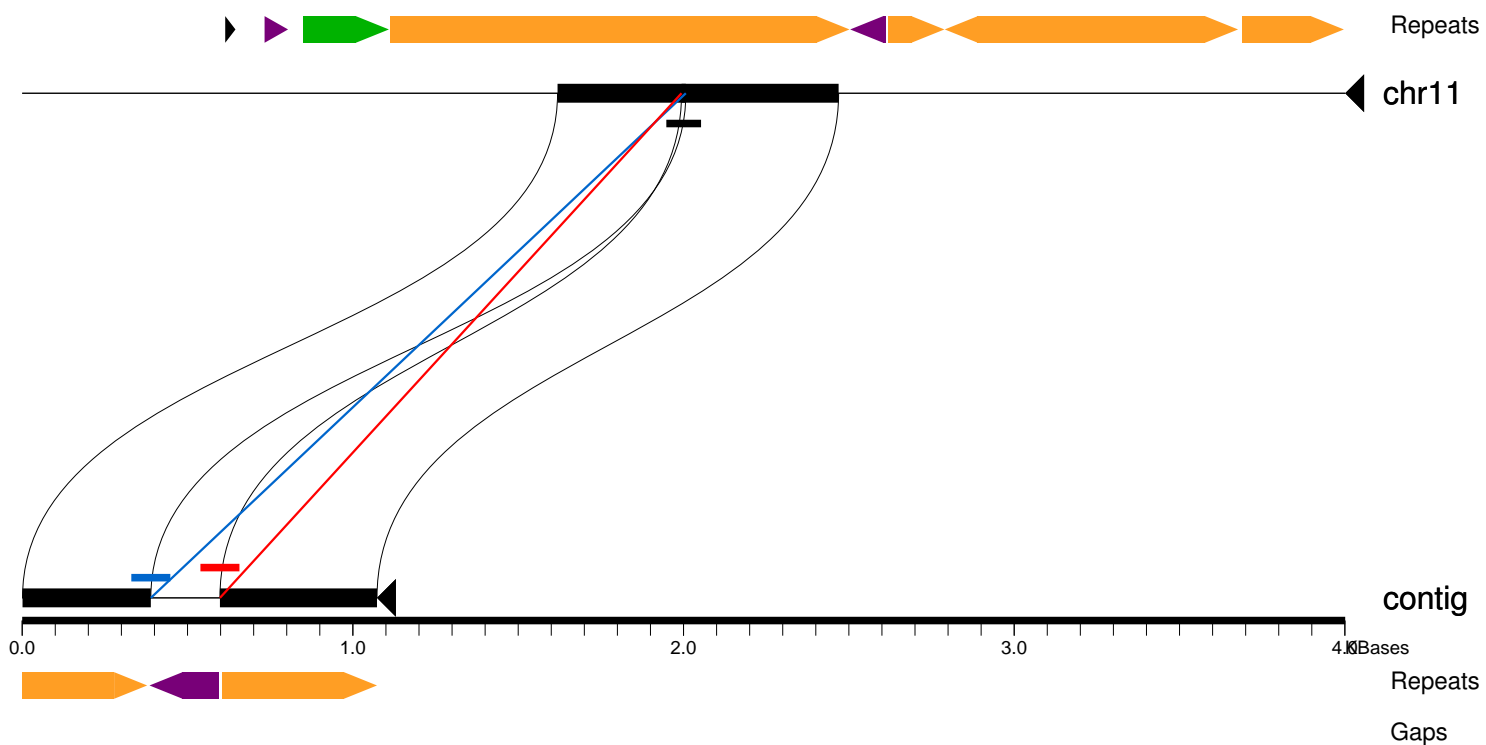





siteID: chr11\_103201274 Scaffitig1 - Breakpoint: chr11:103201267  
 chr11:103201221-103201326  
 Overlap Length: 10 INS size: 493 Genotyped: No

```

left  TTTT-GTTTGGTTAAAAACAGACTTTTG---TTCAGAAAAATGAAAACTAA-----ACAATAAATTG
chrom TTTT-GTTTGGTTAAAAACAGACTTTTG---TTCAGAAAAATGAAAACTAA-----ACAATAAATTT
right CACCCGCCTCGGCCTCCCAAAGTGCTGGGATTACAGGCGTGAGCCACCGCGCCCGGCCCAACAATAAATTT
      11111*11*1*111111**1*1*11**111**1***111111111**111111111111*****2

```

```

left  TTTTNNNNNNNNNNNNNNNNNNNNNNNNNNNNNNNNNNNNNNNNNNNNNNNNNNNNNNNNNNNNNNNN
chrom TTT-----AAATAACTAAAGCTCTAACCTATTTTCATTAATATATATCTTTATT
right TTT-----AAATAACTAAAGCTCTAACCTATTTTCATTAATATATATCTTTATT
      ***2222222222222222222222222222222222222222222222222222222222222222222

```

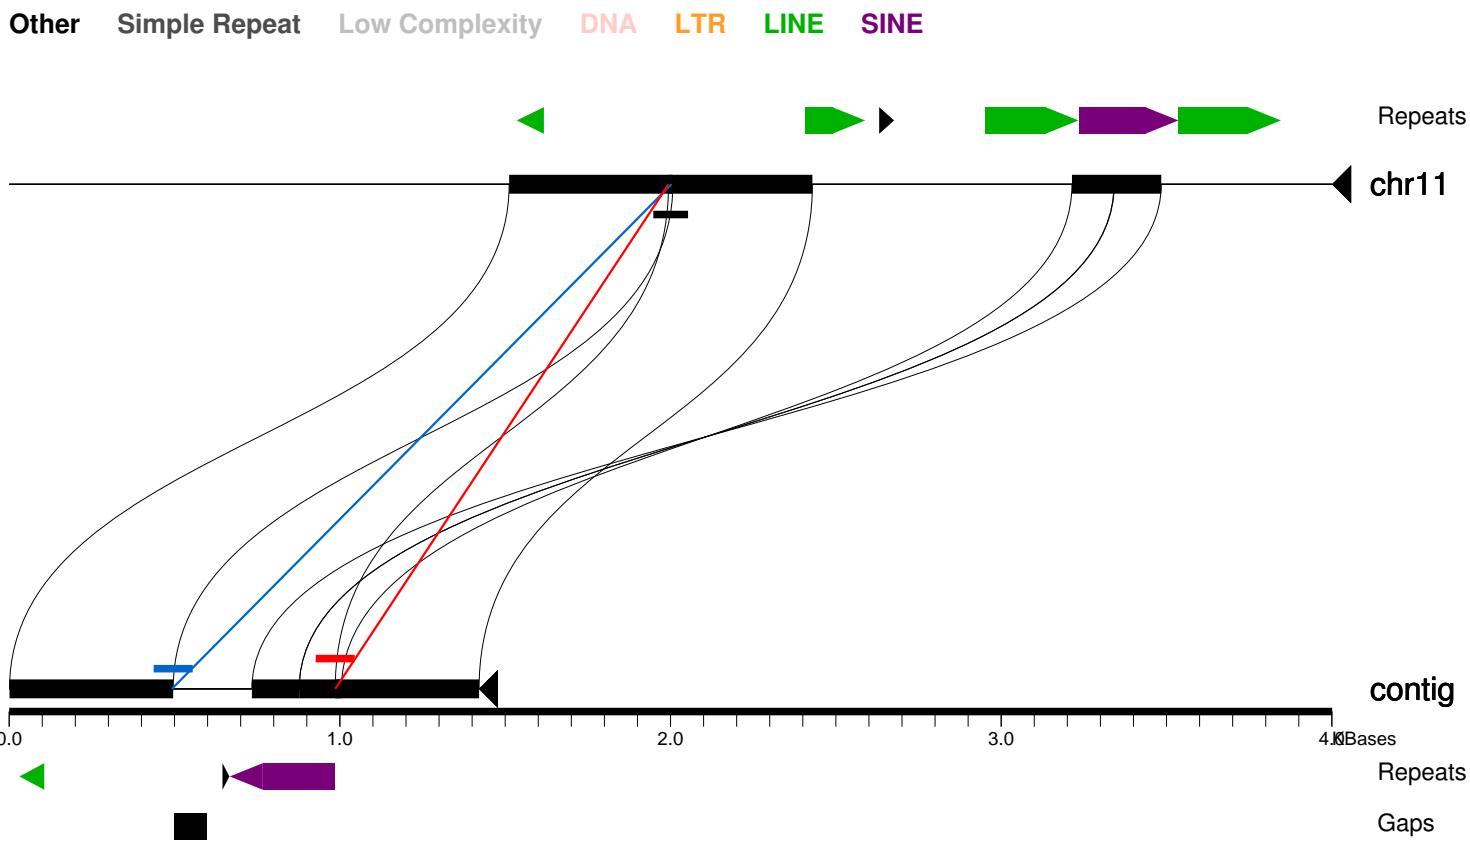

siteID: chr11\_103792596 Scaffig7 - Breakpoint: chr11:103792589

chr11:103792545-103792648

Overlap Length: 16 INS size: 311 Genotyped: Yes

left CT---TGTGCCATT--CAACA-AGGTAGTCATGGCCTTGTGTGGTAATTT-----AAATTTCAATT  
chrom CT---TGTGCCATT--CAACA-AGGTAGTCACGGCCTTGTGTGGTAATTT-----AAATTTCAATT  
right CGCAGTCCGGCCTGGGCAACAGAGCGAGACTCTGTCTCAAAAAAAAAAAAAAAAAAAAAAA~~A~~ATTTCAATT  
\*1111\*11\*1\*1\*111\*\*\*\*\*1\*\*11\*\*1\*121\*1\*\*11111111\*111111111111\*~~\*~~\*\*\*\*\*

left AGTTAGGCCGGGCGCGGTGGCTCACGCCCTGTAATCCCAGCACTTTGGGAGGCCGAGGCCGGGTGG  
chrom AGTTA~~A~~AAACTAAATAA---AATTAAAAATTTAGTTTCT---ATTTGTGCTACACA-----  
right AGTTAA~~A~~AAACTAAATAA---AATTAAAAATTTAGTTTCT---ATTTGTGCTACACA-----  
\*\*\*~~\*~~222\*222222222222\*2\*2222\*2\*\*2\*22\*22222\*\*\*2\*222\*22\*22222222

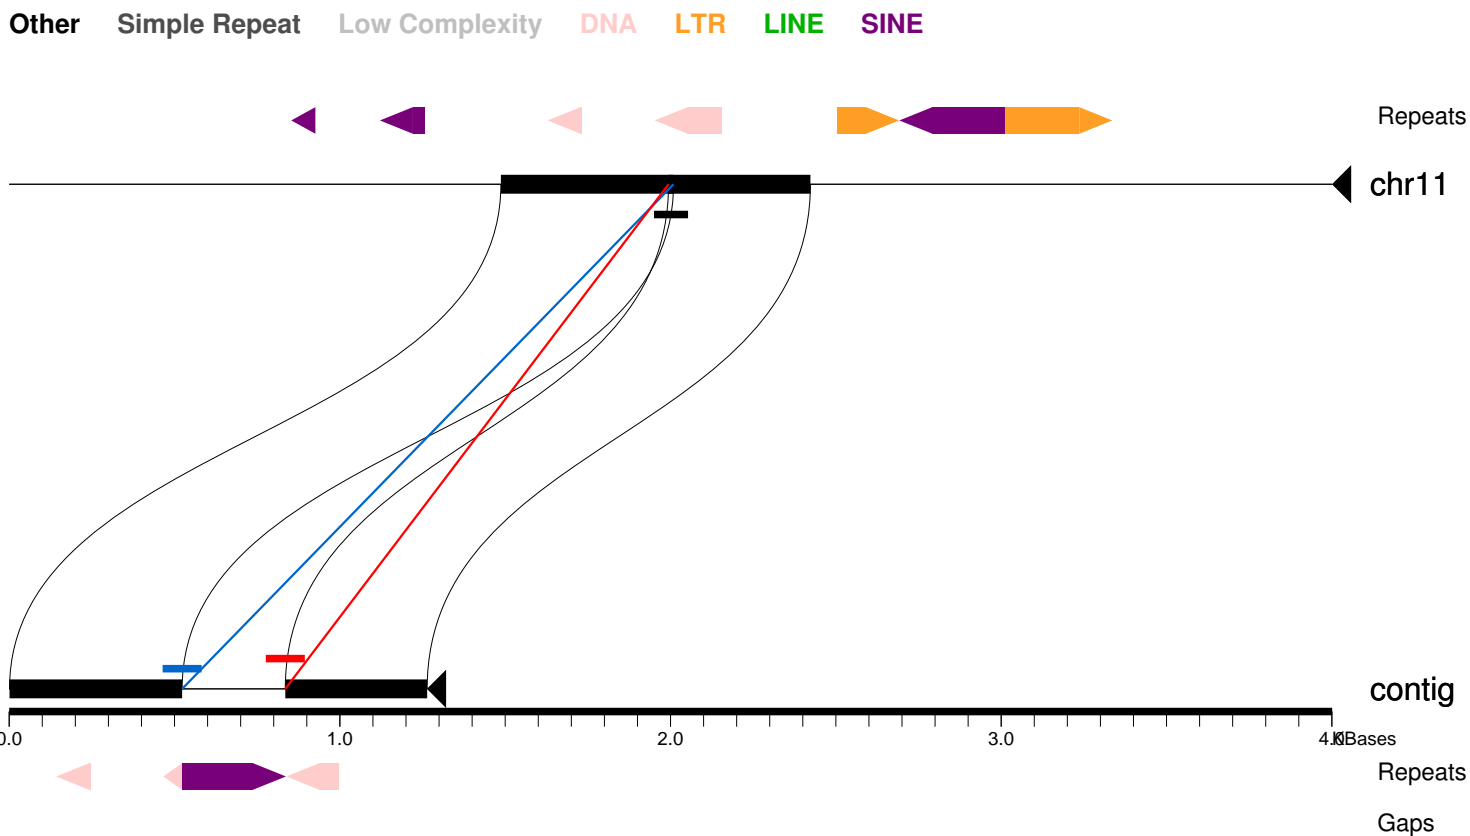



siteID: chr11\_104786613 Scaffitig7 - Breakpoint: chr11:104786599  
 chr11:104786549-104786650  
 Overlap Length: 10 INS size: 302 Genotyped: Yes

```

left -----AGGAAAGATT-----GACA---TGCAAATAAGTATAATGAAACACCTTTTAAAGAATTTAA
chrom -----AGGAAAGATT-----GACA---TGCAAATAAGTATAATGAAACACCTTTTAAAGAATTTAA
right CCGCCACTGCACTCCAGCCTGGGGCGACAGAGCGAGACTCCGTCTCAAAAAAAAAAAAAAAAAAATAAAA
      111111111111*1111**11*1111****1111*11*1*11**1*1*11***1*111111**1***11**
left  ATATTGAGGCCGGGCGCGGTGGCTCACGCCTGTAATCCCAGCACTTTGGGAGGCCGAGGCGGGCGGA
chrom ATATTGAG-----CAGATGCTCAAGAAAAGCATA--AGCAAAGTGTG--TCTCAGGTAG-----
right A-ATTGAG-----CAGATGCTCAAGAAAAGCATA--AGCAAAGTGTG--TCTCAGGTAG-----
      *1*****22222222*2*22*****2*222222**222****222**2*222*22***22*22222
  
```

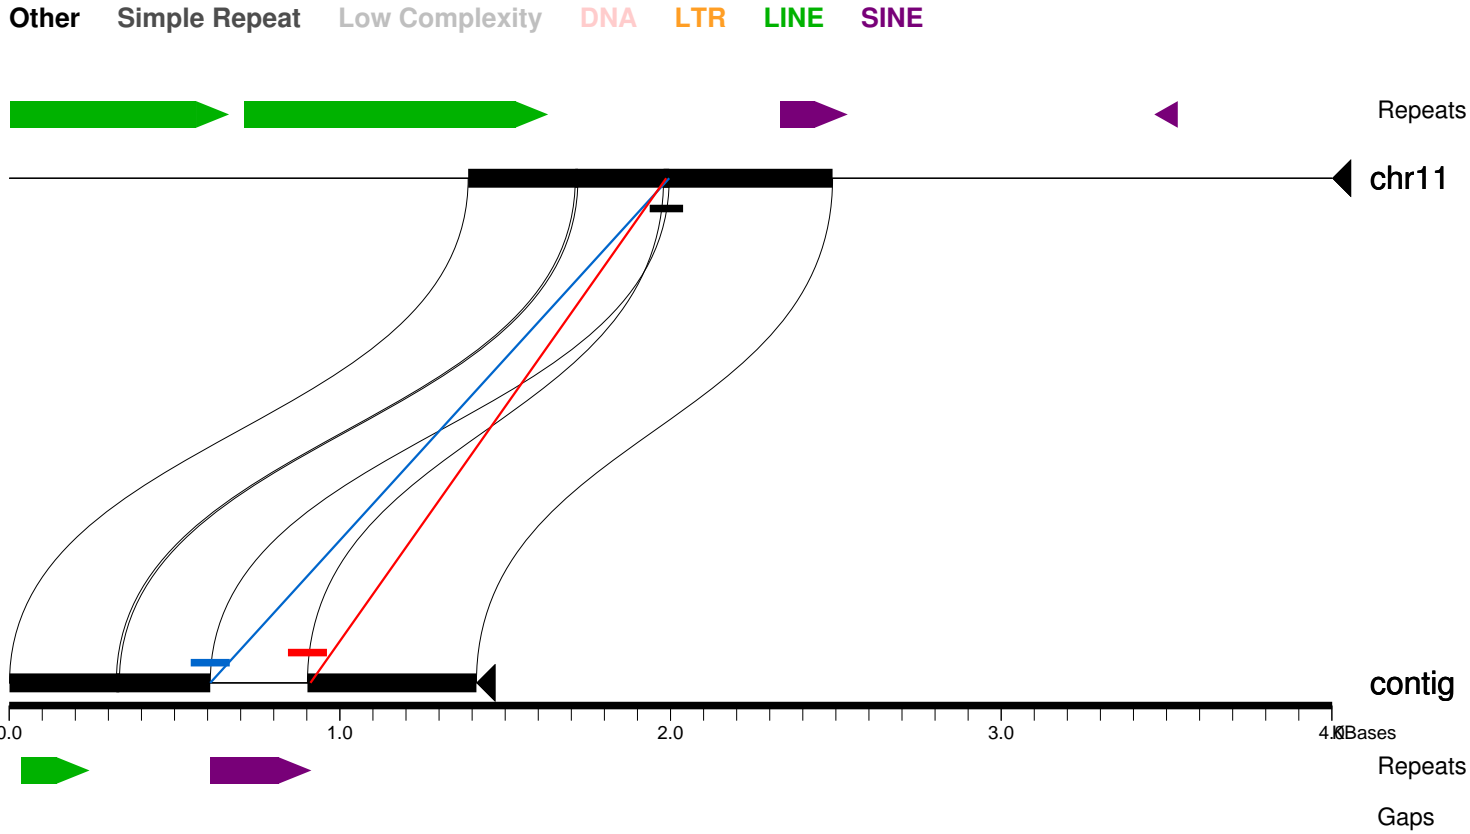

siteID: chr11\_106044575 Scaffig13 - Breakpoint: chr11:106044565

chr11:106044522-106044624

Overlap Length: 17 INS size: 298 Genotyped: Yes

```

left   CCTCTGTA-TGCAGA-TGTTTGA-----AATGCTTCTTCCCAACGCCAT-----AAAGAAATAGC
chrom  CCTCTGTA-TGCAGA-TGTTTGA-----AATGCTTCTTCCCAACGCCAT-----AAAGAAATAGC
right  CCACTGCACTCCAGCCTGGGCGACAGAGCGAGACTCCGTCTCAAAAAAAAAAAAAAAAAAAAAAAGAAATAGC
      **1**1*1*1**11*111*1111111*11**1*1**1*1**1111*111111111********
left   ACTTGAAGGCCGGGCGCGGTGGCTCACGCCTGTAATCCCAAGCACTTTGGG-AGGCCGAGGCGGGCGG
chrom  ACTTGAA-----CATAAATTTAATTTCTCAGCAAGGCCATTTTTATACTTTCT-
right  ACGTGAA-----CATAAATTTAATTTCTCAGCAAGGCCATTTTTATACTTTCT-
      **1***22222222222222222222**2222*2***22*22**2222**22*22222*22*222*22

```

Other Simple Repeat Low Complexity DNA LTR LINE SINE

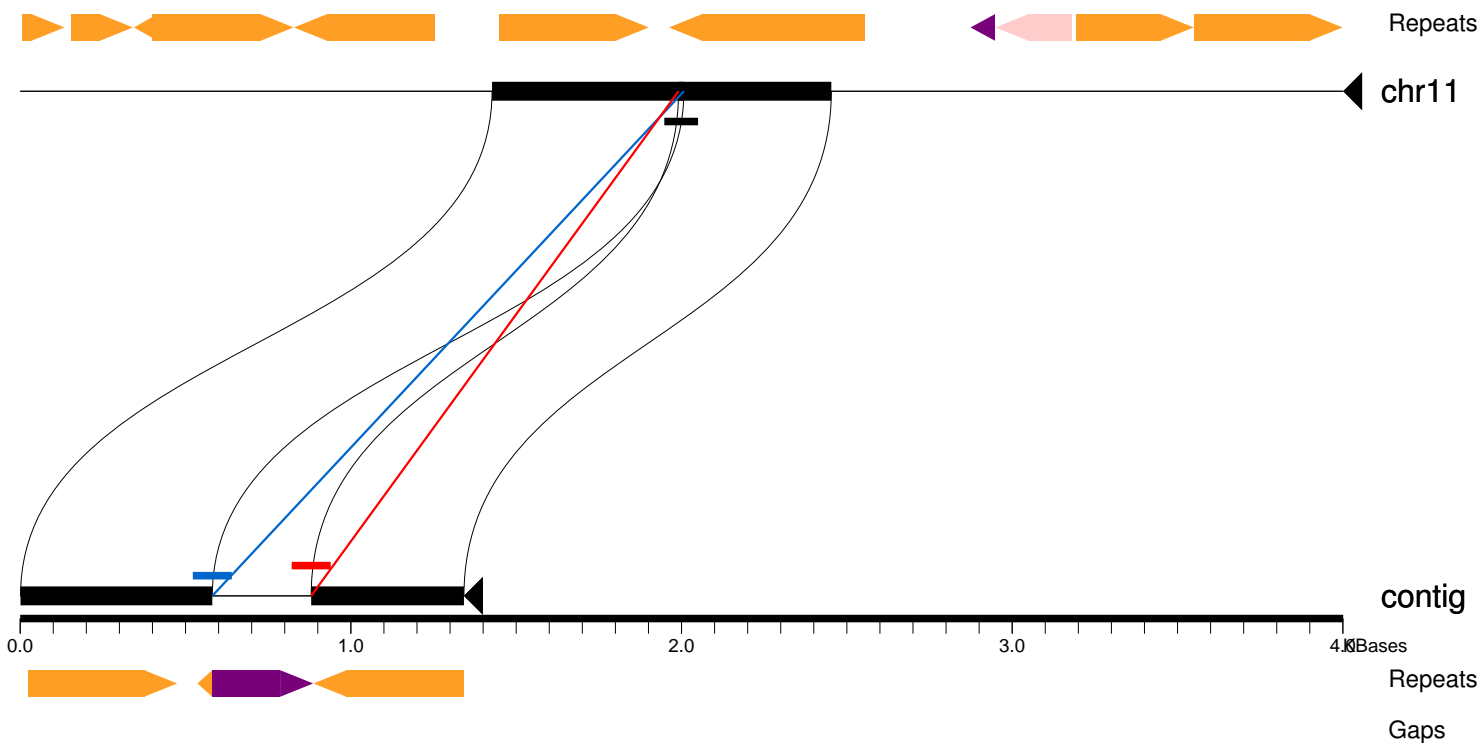

siteID: chr11\_106170487 Scaffitig9 - Breakpoint: chr11:106170468

chr11:106170309-106170641

Overlap Length: 14 INS size: 328 Genotyped: Yes

```

left    T-----TCTCAGTCCAGTAAAAATGTCAGTAGTGAGGAGGAGCCTCCTGTAATCCATTTCAAA
chrom   TGTTTTGACTCATTTCTCAGTCCAGTAAAAATGTCAGTAGTGAGGAGGAGCCTCCTGTAATCCATTTCAAA
right   GG-----CGGAGCTTGCAGT-----GAGCCGAGATCCCGCC---ACTGCACTCCA--
12      2NN2NN*11****11111111111111111*1*11***111*1**111*1*1**1*1**11

```

```

left    TGGACTGGGTTTTAAGTTGCTCTTTGGGGCAGTGTGAATCTGAAAAGAGTGCAATAGGAAATAGCCTTATC
chrom   TGGACTGGGTTTTAAGTTGCTCTTTGGGGCAGTGTGAATCTGAAAAGAGTGCAATAGGAAATAGCCTTATC
right   --GCCTGGGCGACA-----GAGCGAGACTCCGTCTCAAAAAAAAAAAAAAAAAAAAAAAAAAAAA
11*1*****1111*1111111111111*1*11**11*111***1**1*1111**1*11***1*11111*11

```

```

left    CAGGTTTGCATGTTTCTTGAAATAACTTTGCC---GGCCGGGCGCGG---TGGCTCACGCCTGTAA---
chrom   CAGGTTTGCATGTTTCTTGAAATAACTTTGCCAAAAGTTCTTTTAAGGGTATGATTCATCCTTTCTACCT
right   AAAAAAAAAAAAAAAAAAAAAAAAGAAATAACTTTGCCAAAAGTTCTTTTAAGGGTATGATTCATCCTTTCTACCT
1*111111111*111111111*****222*22*222222*222*22***22*2*222*222

```

```

left    -TCC-CAGCACTTTGGGAGGCCGAGCGGGCGGATC-ACGAGGT-----CAGGAGATCGAGACCATCCCG
chrom   TTCCCTCAGGA-TTGGGGATGCCAACAGTCATGTATTTATAATCTATTCCCAGGACTTCCAAAAAGCTTTG
right   TTCCCTCAGGA-TTGGGGATGCCAACAGTCATGTATTTATAATCTATTCCCAGGACTTCCAAAAAGCTTTG
2***2***2*2*2***2***2*2222222*2**22*22*22*22222*****22*2*2*222222*

```

```

left    GCTAA----AACGGTGAACCCCGTCTCT-----ACT----AAA
chrom   AGTGATTTTAGCTATGAAACAGGGTCTATTGTTTCCTGGAGTGACTTTTGAAG
right   AGTGATTTTAGCTATGAAACAGGGTCTATTGTTTCCTGGAGT-----
22*2*2222*2*22*****222***2*2222222222222 111 11N

```

Other Simple Repeat Low Complexity DNA LTR LINE SINE

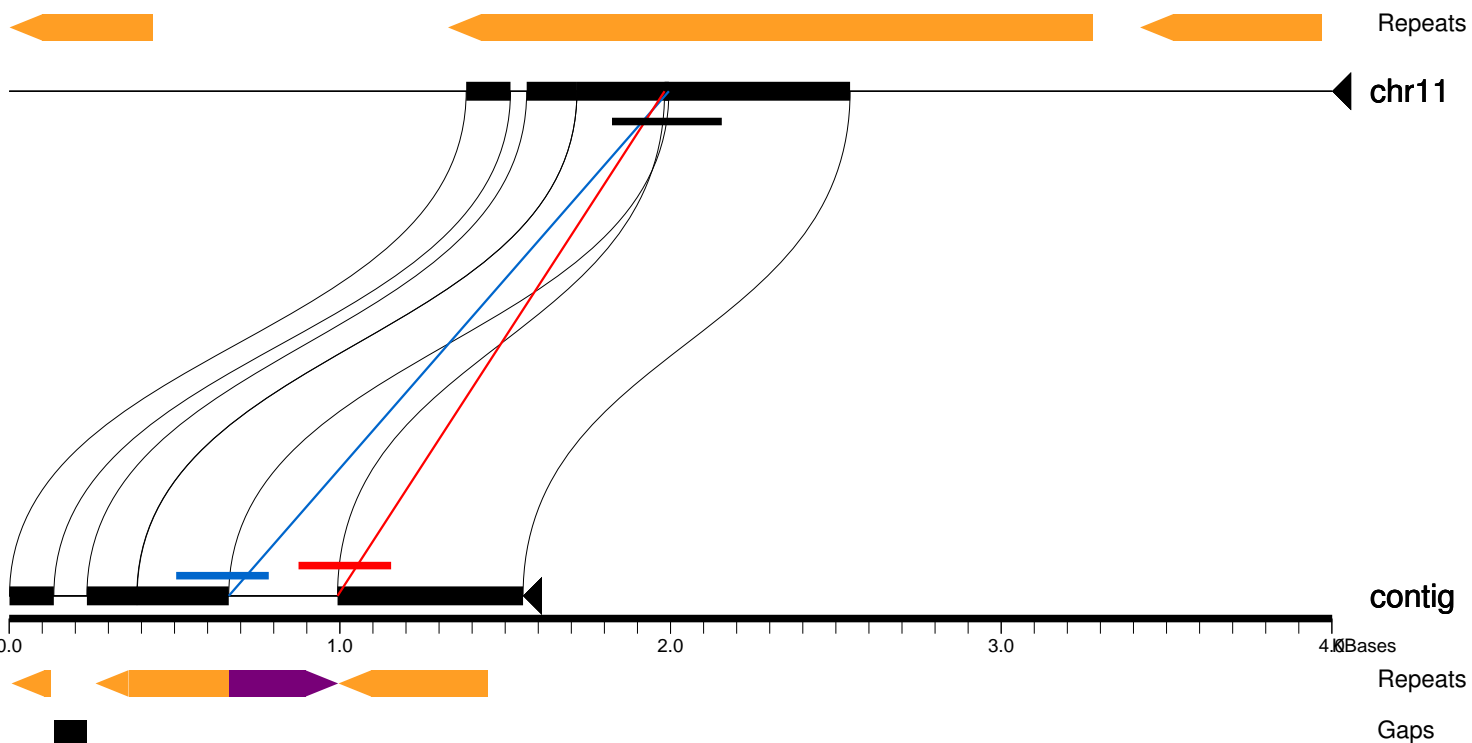

siteID: chr11\_106893666 Scaffitig1 - Breakpoint: chr11:106893657

chr11:106893612-106893716

Overlap Length: 15 INS size: 288 Genotyped: Yes

```
left      -----TTGTCCTCAAATGTCCTAAAAACAGATTTTAAAAATATGCTGAATT-----AAAATCACAAT
chrom     -----TTGTCCTCAAATGTCCTAAAAACAGATTTTAAAAATATGCTGAATT-----AAAATCACAAT
right    AGCGAGACTCCGTCTCAAAAAAAAAAAAAAAAAAAAAAAAAAAAAAAAAAAAAAAAAAAAAAAA^AAAATCACAAT
        111111111*11111*****11111111*****1*1*11111*****1*111111*111111111*^*****
```

```
left      GTGAACTTTGGGAGGCCGAGGCGGGCGGATCACGAGGTCAGGAGATCGAGACCATCCTGGCTAA
chrom     GTGA-----GTGGGTATATTGCATTAAAAATAAATAT-----TAAAT--ACACAAT--TAACTTG
right    GTGA-----GTGGGTATATTGCATTAAAAATAAATAT-----TAAAT--ACACAAT--TAACTTG
        ***22222*22**22222**222222**2*22*2222222*2**22*2**2**22*22**22
```

Other Simple Repeat Low Complexity DNA LTR LINE SINE

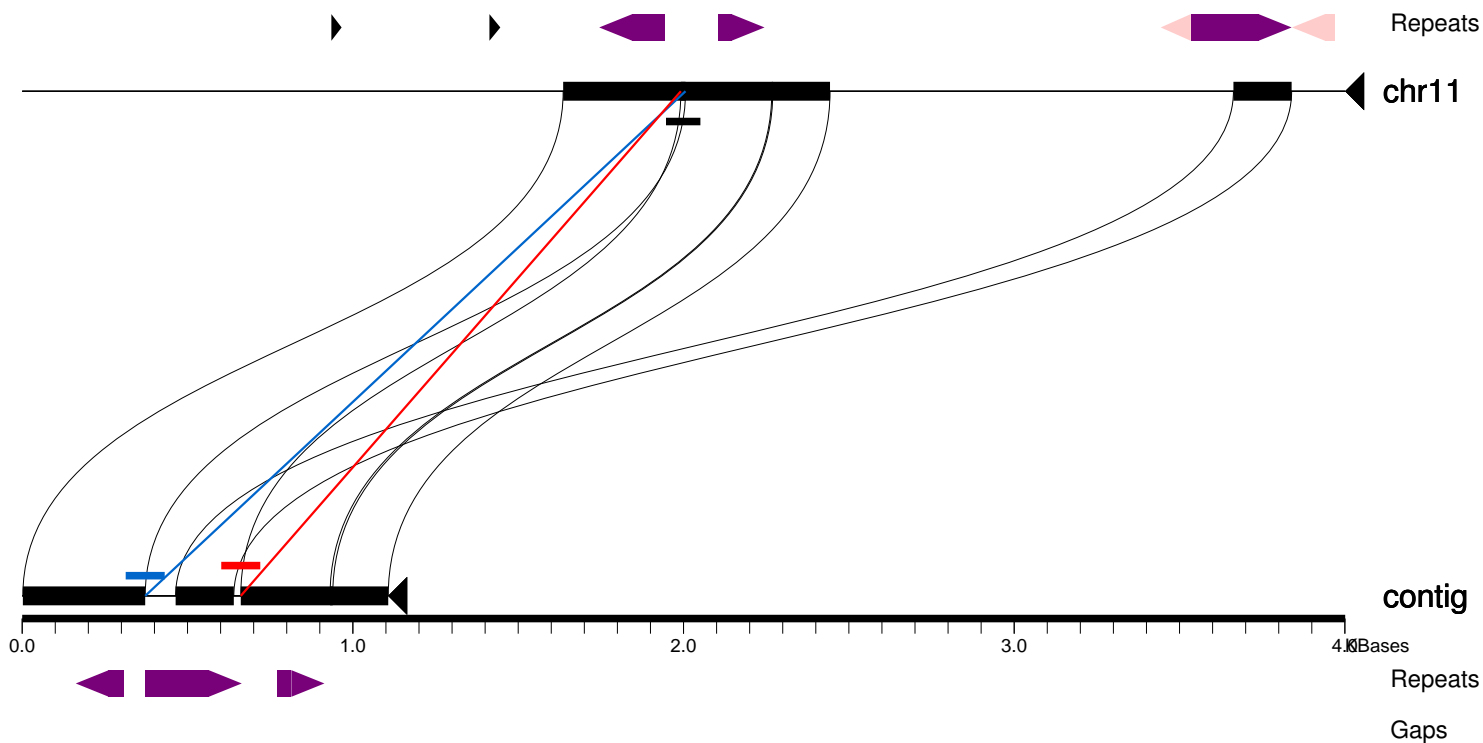

siteID: chr11\_107354612 Scaffitig2 - Breakpoint: chr11:107354618

chr11:107354458-107354795

Overlap Length: 18 INS size: 299 Genotyped: Yes

left -----TCTGATGGTTTAAATTAACCTTGCCCACACTTTAAAAATTTTAAAAATTTCAATAGCT  
chrom CTTCCACTTCTCTGATGGTTTAAATTAACCTTGCCCACACTTTAAAAATTTTAAAAATTTCAATAGCT  
right TTT--AGTAGAGACGG--GGTTTCACCTTG-TTAGCC-----AGGATGGTCTCGATCTCCTGACCT  
N22 2N2NNNN1\*1\*11\*\*\*\*\*1\*11\*111\*\*1\*\*\*111111111\*11\*\*11\*1111\*\*1\*\*111\*1\*\*

left TTATATGTACAACCTGGTTTTTGTACATGGATGAATTGTATAGTGGTGAAGACTGCAGTGTACTCATCA  
chrom TTATATGTACAACCTGGTTTTTGTACATGGATGAATTGTATAGTGGTGAAGATTTTCAAGTGTACTCATCA  
right C---ATGATCCACCCG-----CCTCG--GCCTCCCAAAGTGTGG--GATTACAGG-----CGTGA  
1111\*\*\*11\*1\*\*11\*1111111111\*1\*1\*11\*11\*111\*1\*\*\*\*1\*\*11\*\*2\*N\*\*111111\*1\*1\*

left CCCAAATAGTGTACATTGTACCCAACAGGTAATTTTTCTT-----TTTTTTTGGAGACGG  
chrom CCCAAATAGTGTACATTGTACCCAACAGGTAATTTTTCTTCCCTCACCCCCAACCTCCTCTTTGAGTTTC  
right GCCACCGCG----CCCGGCCCCAACAGGTAATTTTTCTTCCCTCACCCCCAACCTCCTCTTTGAGTTTC  
1\*\*\*1111\*1111\*111\*11\*\*\*\*\*2\*222222222222\*22\*2\*\*\*\*\*2222

left -AGTCTCGCTCTGTCTCGCTCAGGCCAGACTGCGGACTGCAGTGGC---GCAATCTCGTCTCACTGCAAGC-  
chrom TAATGTCTATCATTCCATTCTGTAAGCCCTGCATACCCATAGCTTAGCTCCTACTTATAAGTGAGAACA  
right TAATGTCTATCATTCCATTCTGTAAGCCCTGCATACCCATAGCTTAGCTCCTACTTATAAGTGAGAACA  
2\*2\*2\*\*22\*\*22\*\*22\*222\*22\*\*2\*222\*2\*222\*2\*222\*\*22222\*2\*2\*2\*2\*\*22\*2\*2

left -----TCCGCTTCCCGGTT---CAC---GCCATTCTCCTGCC--T  
chrom TAACGGTATTTGTTTTCTGTTCCTGAGTTACTTCACTTAGGATAATAGCCTCCAGTT  
right TAACGGTATTTGTTTTCTGTTCCTGAGTTACTTCACTTA-----  
22222222222222\*2\*22\*\*\*2\*2\*\*\*2222\*\*222 1NN1N1NN111N1N 1

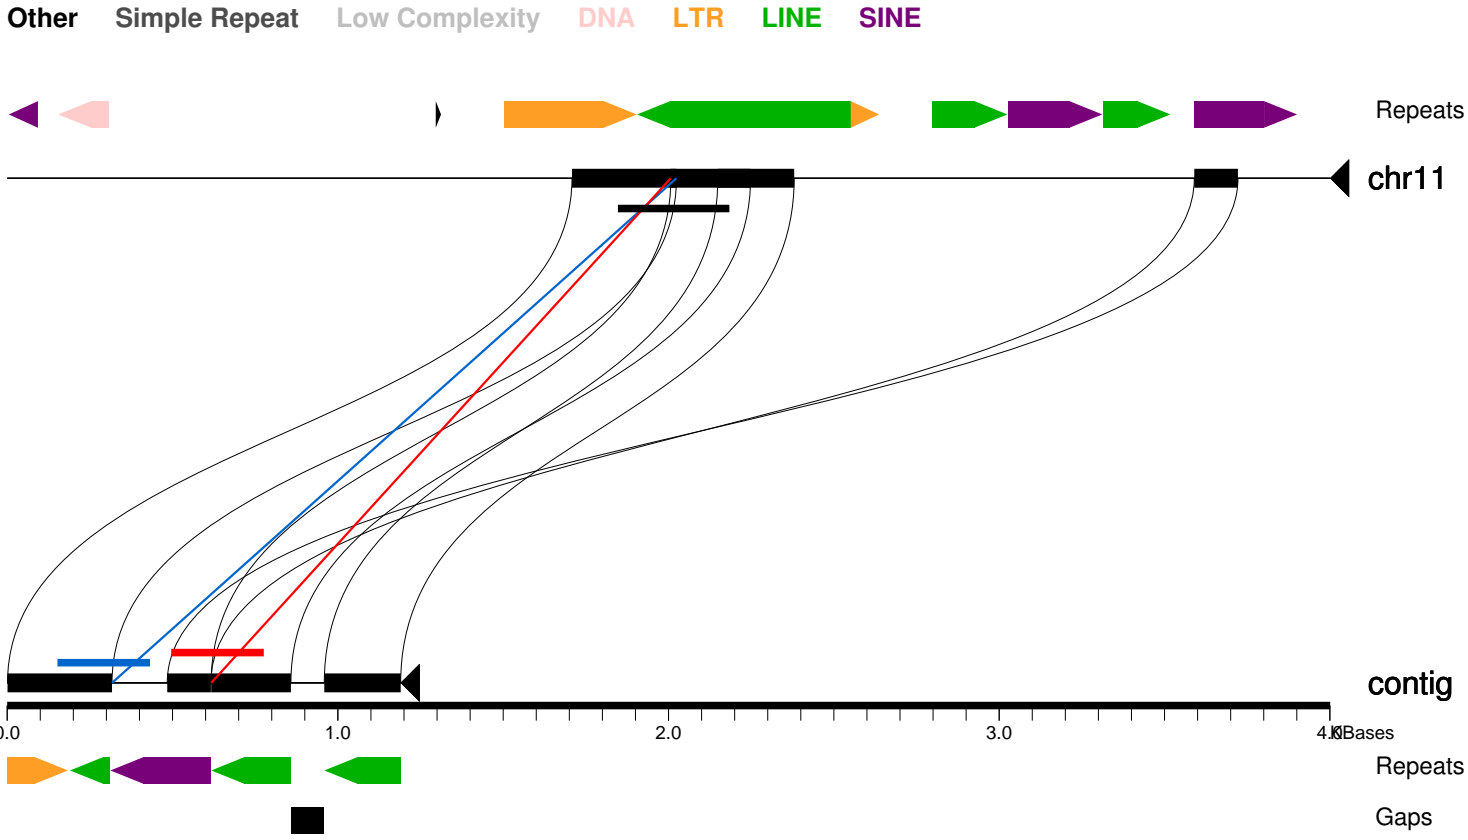



siteID: chr11\_110276925 Scaffig1 + Breakpoint: chr11:110276923

chr11:110276864-110276982

Overlap Length: 0 INS size: 417 Genotyped: No

```
left  GCAACATGGCTTCTCCCTTTCTAGGTCC---CATGGCAGCCATCTTGCTATTTCTCCCTTC-NNNNNN
chrom GCAACATGGCTTCTCCCTTTCTAGGTCC---CATGGCAGCCATCTTGCTATTTCTCCCTTC-GGGCCC
right CCGCCC--GCCTCGGCC-TCCCAAAGTGCTGGGATTACAGGCGTGA-GCCACCGCGCCCGGCCGGGCC
      1*11*111**1**11**1*11*1*1**1*1111**11***1*1*111**1*11N*1*N*111*1222222
```

  

```
left  NNNNNNNNNNNNNNNNNNNNNNNNNNNNNNNNNNNNNNNNNNNNNNNNNNNNNNNNNNNNNNNNNNN
chrom GGTATTTTTTAACCTCCTTGTCAAATTTGTTTCCTCTAGGATCGAGGCTATCAA
right GGTATTTTTTAACCTCCTTGTCAAATTTGTTTCCTCTAGGATCGAGGCTATCAA
      2222222222222222222222222222222222222222222222222222222222222222222222
```

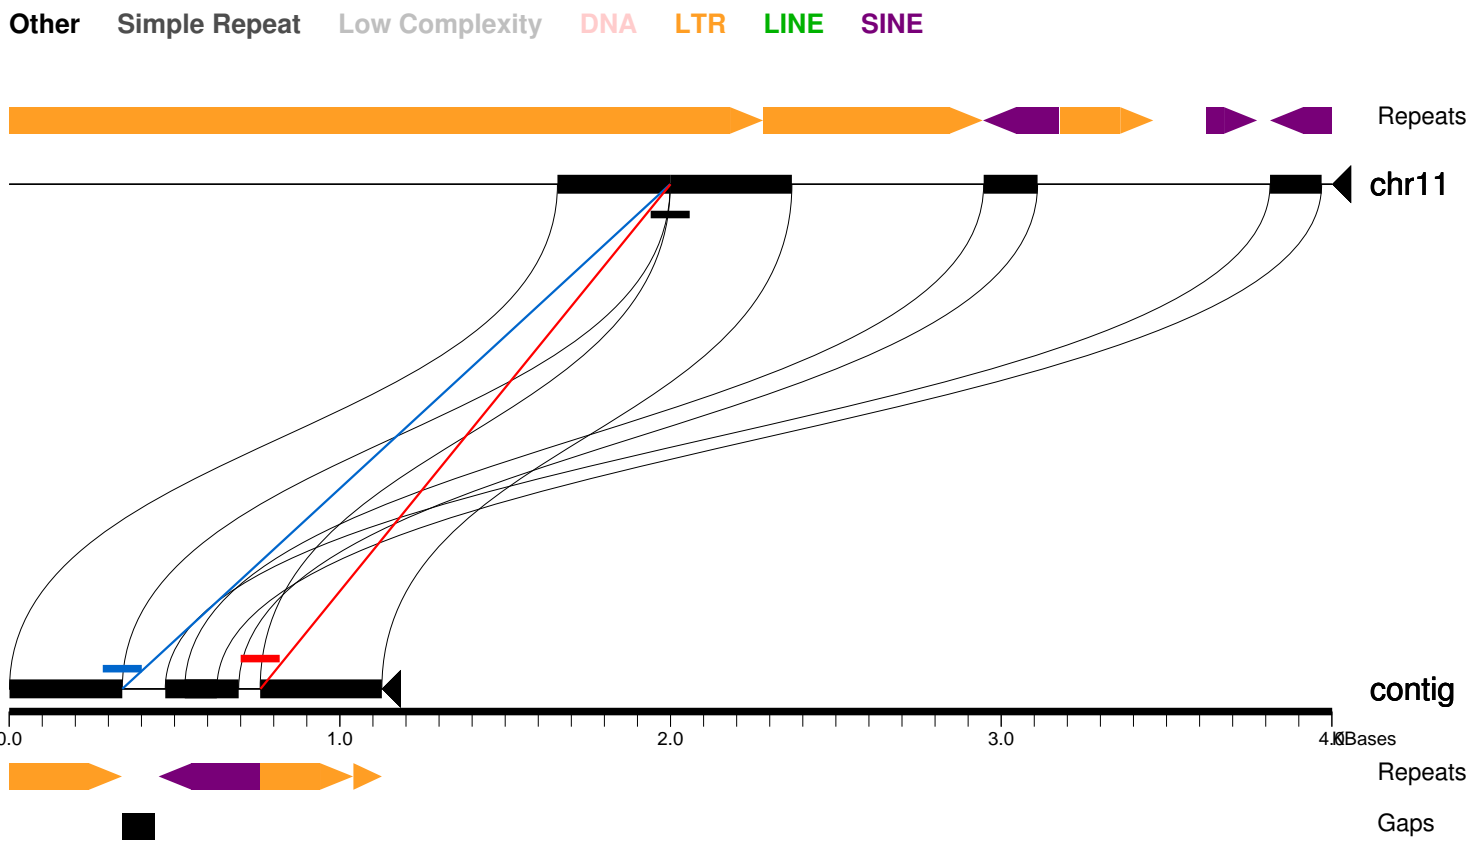







siteID: chr11\_126903189 Scaffitg1 - Breakpoint: chr11:126903173

chr11:126903013-126903347

Overlap Length: 15 INS size: 422 Genotyped: No

```
left      A-----TCAATCCAATTTTTTTTTTATAT
chrom
right    AGAAGTCTAAATTTGGCACAGCTT-ATTTGGAGGGCAACTGGATGATATCAATCCAATTTTTTTTTTATAT
TTTAGTAGAGACGG----AGTTTCACCTTGTTAGCCA--GGATGGTCTCGATCTCCTGACCTCATGATC-
1NN222NN2N2NN2      22N2212NN2N2NNN22N2      22222N2N**1***111*1111*11*1**11
```

```
left      CACATACTATTTGGTTCAGCAATGTTATTTCTGGGAGTTTGTCTGCAGAACTACTTATATAATGCACAA
chrom
right    CACATACTATTTGGTTCAGCAATGTTATTTCTGGGAGTTTGTCTGCAGAACTACTTATATAATGCACAA
--CACCCGCCTCGGCCTCCCAAAGTG----CTGGGATTA-----CAGGCGTG-----AGCCACCG
11**11*111*1**11111***1**11111*****1*11111111***11**111111111*11**11
```

```
left      CAATGTATGGAGAAGAATGTTTCATTGCTGAATTAT-----
chrom
right    CAATGTATGGAGAAGAATGTTTCATTGCTGAATTATGATATTGATAATGGCACAAAACCTGGAAGCTGCTA
C-----GCCCGGCATTGCTGAATTATTGATATTGATAATGGCACAAAACCTGGAAGCTGCTA
*111111111111111*111*11**********222222222222222222222222222222222222
```

```
left      ---TTTTNNNNNNNNNNNNNNN-----
chrom
right    TAGTATTTATCATTAGCAGAGTGTTTAGAAAAGATTGTGGTGTATTTGTGTAATGGAATATGTTAACTAAG
TAGTATTTATCATTAGCAGAGTGTTTAGAAAAGATTGTGGTGTATTTGTGTAATGGAATATGTTAACTAAG
222*2***22222222222222222222222222222222222222222222222222222222222222222222
```

```
left      -----
chrom
right    AGAAGTAGCTATACAAGTACTGGGGTTGAAAGGCTAGGCCAGCGTGCCAGAATGC
AGAAGTAGCTATACAAGTACTGGGGTTGAAAGGCTAGGCCA-----
22222222222222222222222222222222222222222222222222222222222222222222
```

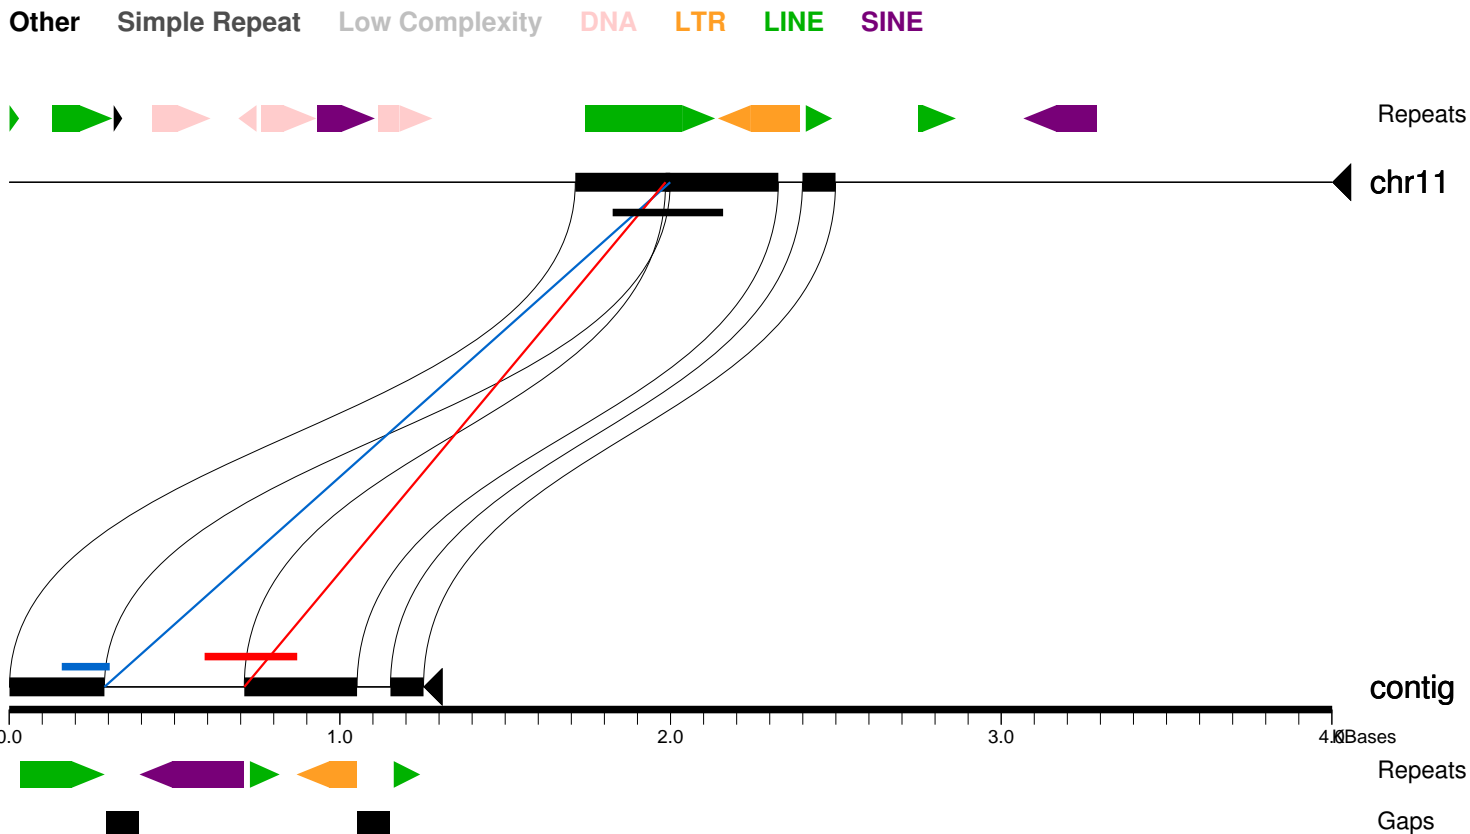





siteID: chr11\_128997459 Scaffitg3 + Breakpoint: chr11:128997467

chr11:128997307-128997640

Overlap Length: 14 INS size: 297 Genotyped: Yes

left T-----TCTGTCCAGCAATATTTTCCTAGAGCACAGAAAAGTTCCAGGAATATCCTAGCCTC  
chrom TGCCCATGTA-TGTTCTGTCCAGCAATATTTTCCTAGAGCACAGAAAAGTTCCAGGAATATCCTAGCCTC  
right AGA--ATGGCGTGAACCCGGGAGGCGGAGCTTGC-AGTGAGCCGAGA---TCCCGCCA---CTGCACTC  
12N 222NN122N1\*11111\*\*1111\*11\*\*1\*1\*\*1\*11\*1\*\*1\*111\*\*\*1\*11\*1111\*\*111\*\*\*

left TCAGTATATTTTTGTGAATGAACAAATACAATACACTTTAACATAACAAGGTTTTGTTCATTTACTCTTTC  
chrom TCAGTATATTTTTGTGAATGAACAAATACAATACACTTTAACATAACAAGGTTTTGTTCATTTACTCTTTC  
right -CAGCCTGG---GCGACAGAGCGAG---ACTCCGTCTCAAAAAAAAAA-----TA  
1\*\*11\*111111\*1\*\*11\*\*1\*1\*1111\*1\*1\*111\*1\*\*1\*1\*\*1\*\*1111111111111111\*1

left AAGATGAAGCCAGTAGAACTGAAAGGAAAATACTGGC-----TCA--CGCCTG-----TAATC----  
chrom AAGATGAAGCCAGTAGAACTGAAGGAAAATACTGTACTATTATTCAATCACCTGATGAACTAATATTTT  
right AAAAAAAAAAAAAAAAAA---AAGGAAAATACTGTACTATTATTCAATCACCTGATGAACTAATATTTT  
\*\*1\*11\*\*111\*11\*1\*\*111\*\*\*\*\*22222222\*\*22\*2\*\*\*22222\*\*22222

left --CCAGCACTTTGGGAGGCCGAGGCGGGCGG-----ATCAC----GAGGTCAGG-AGATCGAG--ACC-  
chrom CACCTACATATTTTAAAAAATAAAACAAATATCTTAAATTTCTATTGAGAGCACATAGCTTGAGTTACTT  
right CACCTACATATTTTAAAAAATAAAACAAATATCTTAAATTTCTATTGAGAGCACATAGCTTGAGTTACTT  
22\*\*22\*\*22\*\*222\*22222\*22\*2222222222\*\*22\*2222\*\*\*22\*\*222\*\*2\*2\*\*\*22\*\*22

left ATCCCG--GCTA-AAAC---GGTGAACCCCGTCTCTACTAAAAATACAAAAAAT  
chrom ATTCTGTTGCTCCAAACCAAAGATTAAGAAAAGTTCTTTTTTAGAAA-ATAGTTTCA  
right ATTCTGTTGCTCCAAACCAAAGATTAAGAAAAGTTCTTTTT-----  
\*\*2\*2\*22\*\*\*22\*\*\*2222\*2\*2\*\*22222\*\*2\*22\*1N11121N1N1NNN11

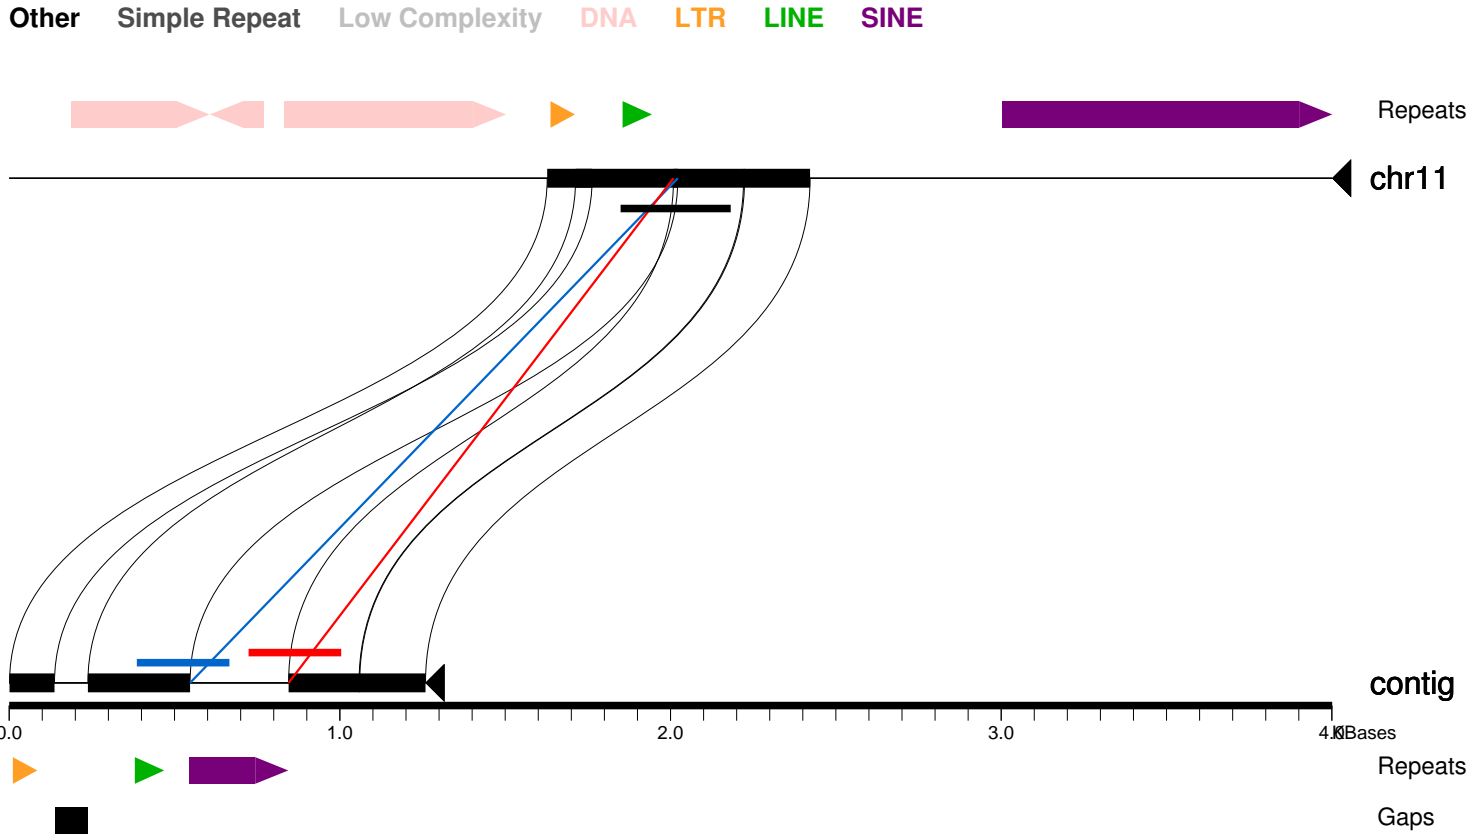









siteID: chr11\_13813046 Scafftig4 + Breakpoint: chr11:13813020

chr11:13812975-13813079

Overlap Length: 15 INS size: 326 Genotyped: Yes

```
left  ATCATGAGGATGGAGCCCTC-----ATGAATGGGAGTACTGCTTTTATAGAAAGAGGTCC
chrom ATCATGAGGATGGAGCCCTC-----ATGAATGGGAGTACTGCTTTTATAGAAAGAGGTCC
right GACA-GAGCGAGACTCCGTCTCAAAAAAAAAAAAAAAAAAAAAAAAAAAAAAAAAAAAAAAAAA
11**1***111*111**1**1111111111111111*11**1111*11*11111111*1*1*****
```

```
left  TGGGGGCCGGGCGCGGTGGCTCACGCCTGTAATCCACAGCACTTTGGGAGGCCGAGGCGGGTGA
chrom TGGGGAGCTGCCTTGTTCCTTCCAGCATGTGA-----GGATTCAGTAAG---AAGGC-----A
right TGGGGAGCTGCCTTGTTCCTTCCAGCATGTGA-----GGATTCAGTAAG---AAGGC-----A
****22*2*2*22*2*222**22**2***2*22222*2*2*22*22**2222****222222*
```

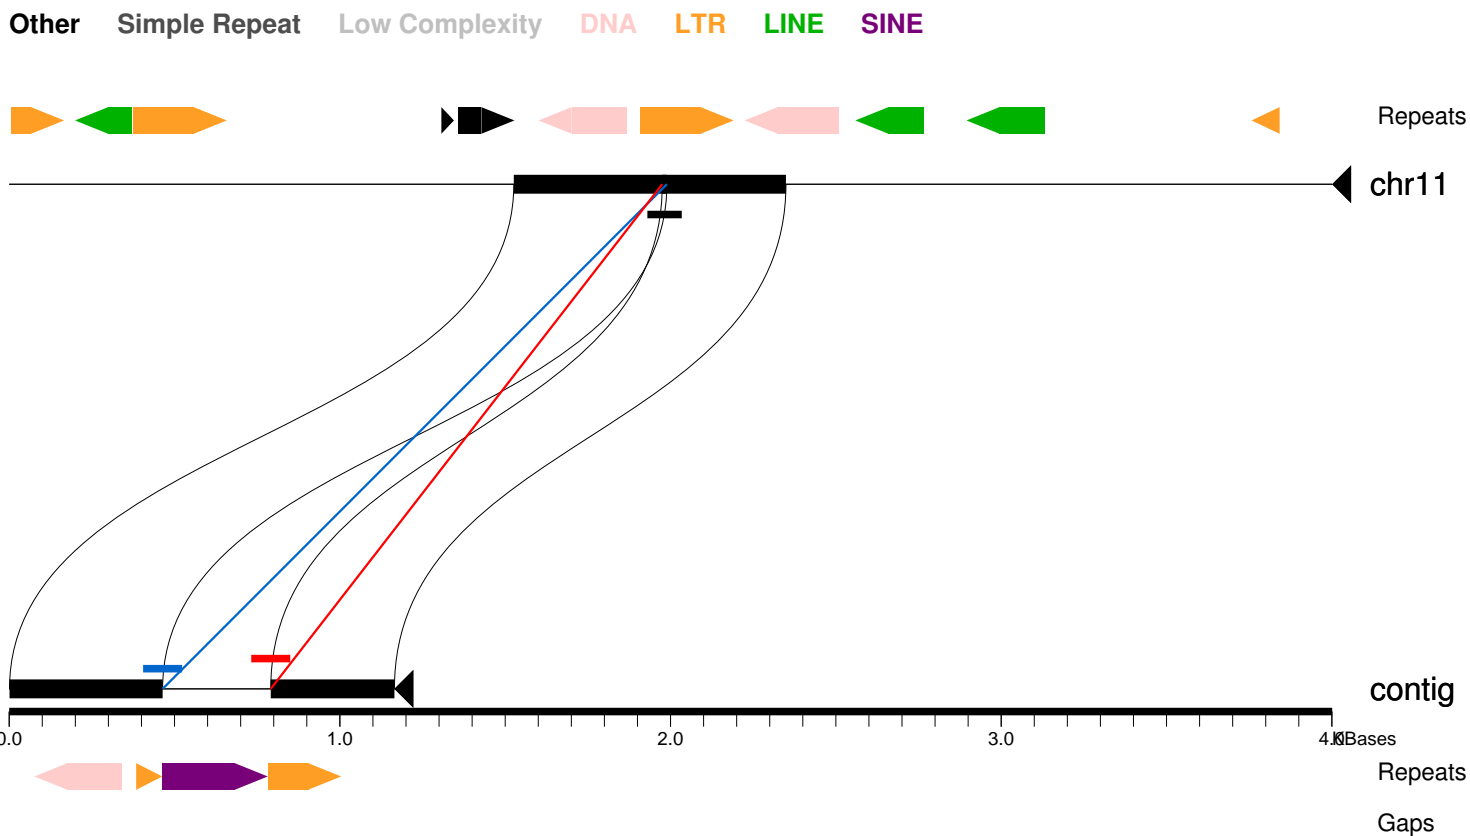



siteID: chr11\_19963016 Scafftig1 + Breakpoint: chr11:19962994

chr11:19962834-19963172

Overlap Length: 19 INS size: 312 Genotyped: Yes

```
left -----GACTGTGCACTCTTTGGTGTCAAATCAAATGGGGTTGGTCGCTAACAA
chrom CTGTGC--AGCCAGTAGTGTCTTGACTGTGCACTCTTTGGTGTCAAATCAAATGGGGTTGGTCGCTAACAA
right GGAGGCTGAGGCAGGAGAA--TGGC-GTGAACCCG--GG-----AAGCGGAGCTTGCAGTGAGCCG
NNNN221122N222N22NN 2*1*1***1**1*111**111111111**11**1*1*1*11*11*1*11
```

```
left AAATTCCTTATCAGGGTGACATGTCTTTATATTCAAGCAGTAGAAGTCACACATGTGACTATGTTGAATT
chrom AAATTCCTTATCAGGGTGACATGTCTTTATATTCAAGCAGTAGAAGTCACACATGTGACTATGTTGAATT
right AGATTGCGCCACTG-----CA-GTCCGCAG--TCCGGCC-TGGGCGACAGAGC-GAGACTCCGTCTCAAA
*1***1*1111*1*11111**1***111*111**11**11*1*11*1*1**1*111*1****11**111*11
```

```
left TTTTTTTTATGGAGACACTGAATAATAAATAGCATGAGGTTGGC-----CGGGCGGGTGGCTCACGCC
chrom TTTTTT--TATGGAGACACTGAATAATAAATAGCATGAGGTTGAATTTAACTTACCCACAGCCAATCCTT
right AAAAAA--AATAAATAAATAAATAATAAATAGCATGAGGTTGAATTTAACTTACCCACAGCCAATCCTT
111111221**11*1*1*111*11*****222222*222*2*222*2*222*222
```

```
left TGTAATCCCAGCACTTTGGGAGGCCGAGGCCGG--TGGATCATGAGGTCAGGA---GATCGA-----G
chrom TGAAATGACAGTGCAT-GGTAGGACTATTTAGAAATGGACATTTACATAACTATTTGATCAATTTGCTTAG
right TGAAATGACAGTGCAT-GGTAGGACTATTTAGAAATGGACATTTACATAACTATTTGATCAATTTGCTTAG
**2***22***22*2*2**2***2*2*2222*222****222*2*22*2*22*222****2*2222222*
```

```
left ACCATCCTGG--CTAA--CAA---GGTGAAC--CCT-----GTC-TCTACTAAA----
chrom TTCTTCCTCTTACTTATGCAAATGGGTGGGTTTTCCTATGGTGTGTGGTCATGTACAGAGCCTT
right TTCTTCCTCTTACTTATGCAAATGGGTG-----
22*2***2222*2*22***222****NNNN 111 111 1N111NN1N
```

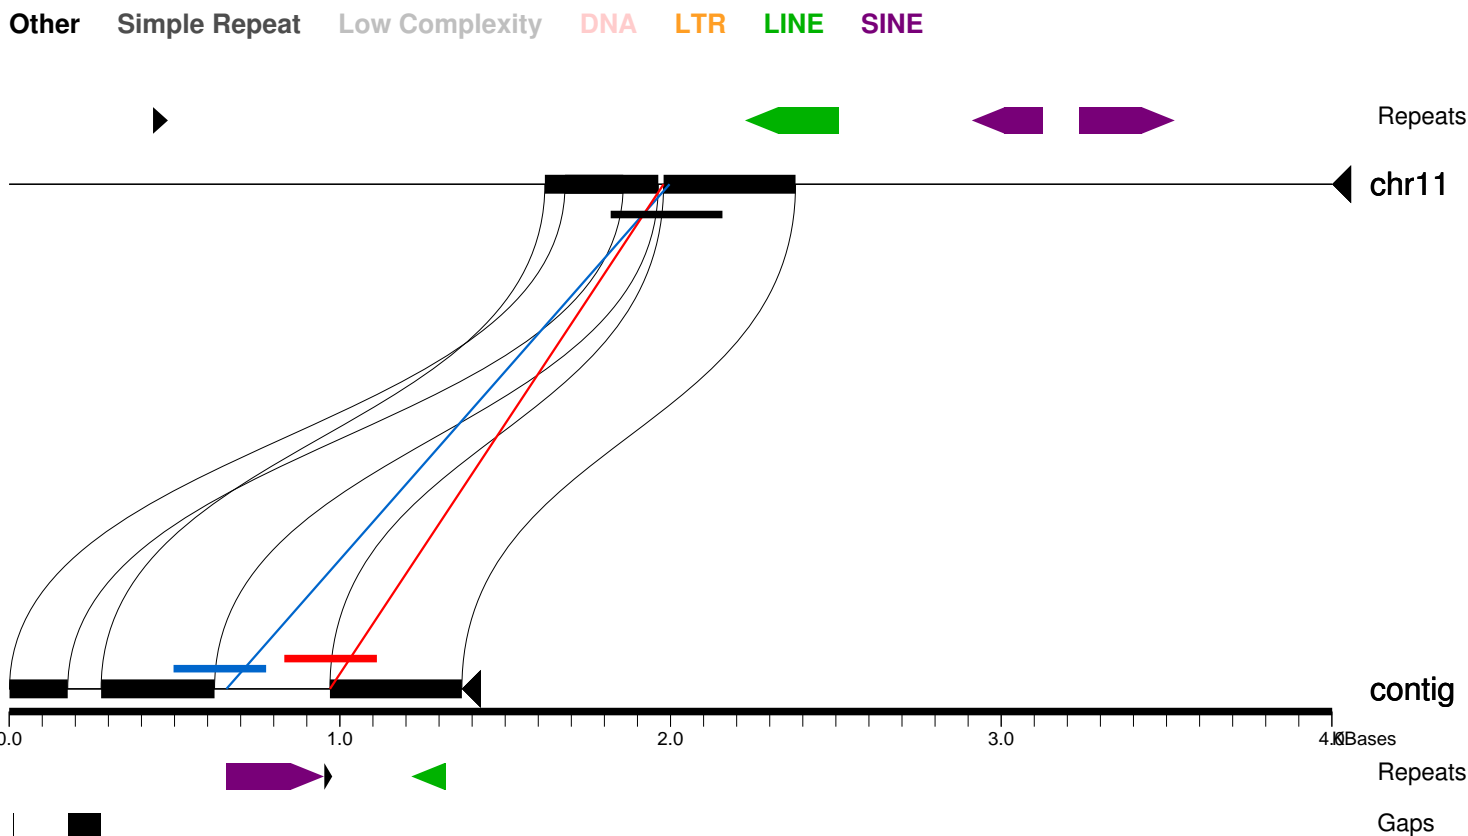



siteID: chr11\_23270698 Scafftig5 - Breakpoint: chr11:23270707

chr11:23270547-23270876

Overlap Length: 10 INS size: 229 Genotyped: Yes

```
left -----CTTTATT-TATTTTATCAGTGCTTTGCAGTTTGTGTGTTGAGGTCTTTCACCTCATTGGTAAA
chrom G-TCCTCTTTATT-TCTTTTATCAGTGCTTTGCAGTTTGTGTGTTGAGGTCTTTCACCTCATTGGTAAA
right GGTTACAGCCATTCTCCTGCCTCAGC-CTCCCGAGTAGCTGGGACTACAGGCGCCCGCCACCTTG-----
      212N2N*111***1*21*111****11**1111***111**1111*111*1*111*1**1*1***11111
```

```
left ATGGAATCCTAGGTATGCTTTTTTTTGCAGCTATTATAAAACAAGATTGCTTTCTTATTTTTTCAGCTAGTTT
chrom ATGGAATCCTAGGTATGCTTTTTTTTGCAGCTATTATAAAACAAGATTGCTTTCTTATTTTTTCAGCTAGTTT
right -----CCCGGCTAA---TTTTTTTGTATTTTTAGTAGAGACGGGG-----TTTTCACCGTGT-
      11111111**11*1**1111*****1*11*1*11**1*1*1*11111111111111*****1*11***1
```

```
left GTAATTGGTGTATAGAGTCACTATTGATTTTTTTTTTTTTTTTTTTTTTTTTTTTTTTTTTTTTTTTTTTTT
chrom GTAATTGGTGTATAGAGTCACTATTGATTTTTTTTTTTTTTTTTTTTTTTTTTTTTTTTTTTTTTTTTTTTT
right -----AGCCAGGATTGATTTTTTTGTATGTTGATTTTTGTACCTGCATTTTTACTGAATTTTA
      11111111111111111111**1**11*****N**2*2*2**22***2*2222222*****22*222***2
```

```
left TTTTGAG---ACGGAGTCTCG-----CTGTCGCCAGGCTGGAGTGCAG-TGGCGCAATCTC----
chrom AAATCAGTTCTATGAATTTTCTGCTGCAGTCTGTAGCTTTTACTGTATATAAGATTACATCATCTACAAA
right AAATCAGTTCTATGAATTTTCTGCTGCAGTCTGTAGCTTTTACTGTATATAAGATTACATCATCTACAAA
      222*2**2222*2*2*2*2**222222222*****2**22222***2*2222**2*22*222****22222
```

```
left --GGCTCACTGCAGGCTCCGC-----CCCCTGGG-----GTTCA
chrom AAGGGACAATTTGACTTCTTCTTTTTCAATTTGGATGCTGTTTATTTGTTTA
right AAGGGACAATTTGACTTCTTCTTTTTCAATTTGGATGCCATTTA-----
      22**22**2*222222**22*22222*222*2**2222NN2222 111N1
```

Other Simple Repeat Low Complexity DNA LTR LINE SINE

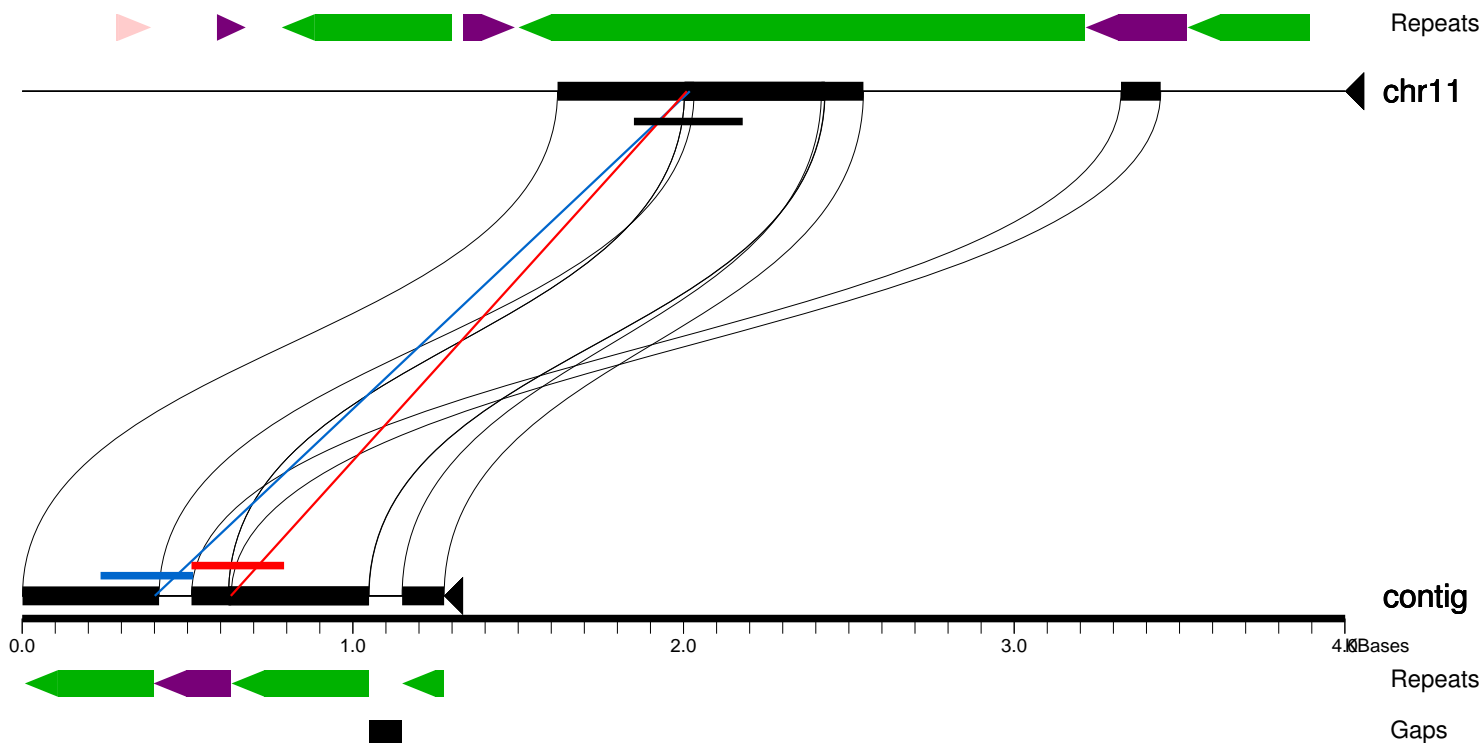



siteID: chr11\_23358519 Scafftig1 - Breakpoint: chr11:23358504

chr11:23358458-23358553

Overlap Length: 14 INS size: 293 Genotyped: Yes

```
left  T-----GCAAATAAAATTTGTGTCAACATTTAAAGAAAGAAAC-----AAAATGTAAGA
chrom T-----GCAAATAAAATTTGTGTCAACATTTAAAGAAAGAAAC-----AAAATGTAAGA
right TGAGCCGAGATCCCGCCACTGCACTCCAGCCTGGGCGACAGAGCGAGACTCCCGTCTCAAAAAAAAAAAAAA
*11111111111111111111**1*1*11*1*111*1*111111*1***11**1**111111111111****111**1*
```

```
left  AAATACTTTTTTTCGGCCGGGCGCGGTGGCTCACGCCTGTAATCCCAGCACTTTGGGAGGCCGAGGCGGGT
chrom AAATACTTTTTTTCACA-----GAACAA-----AAGACTAGCAATTTGCCA--CCATAACCT--
right AAATACTTTTTTTCACA-----GAACAA-----AAGACTAGCAATTTGCCA--CCATAACCT--
*****2222222222222222*22**2222222*22*2**2**2**2**22*22**2222*2222
```

```
left  GG
chrom --
right --
      22
```

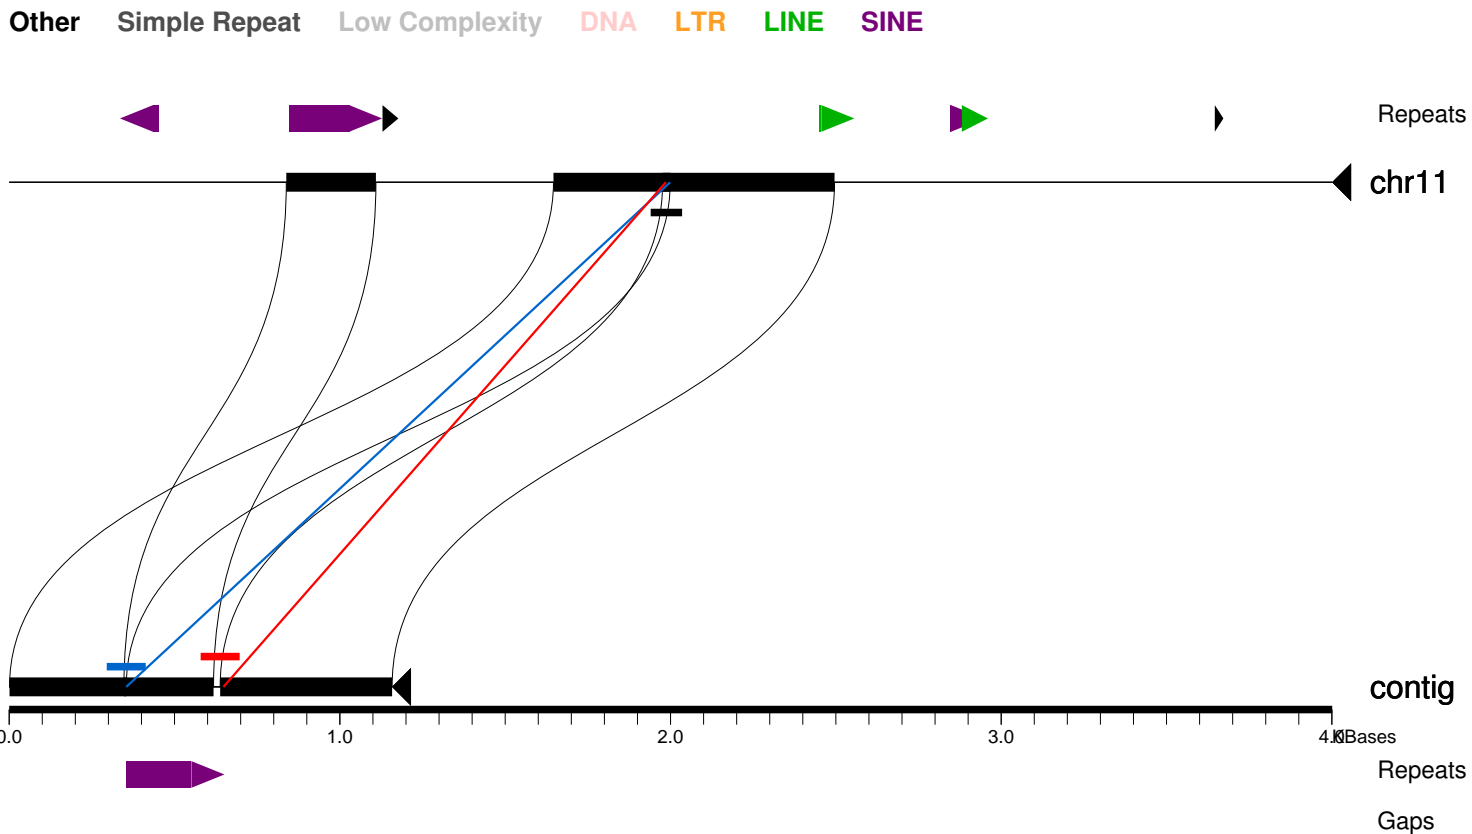







siteID: chr11\_26601649 Scafftig3 + Breakpoint: chr11:26601646

chr11:26601587-26601709

Overlap Length: -3 INS size: 310 Genotyped: Yes

```
left  ATACAAAATGAGGTGCAAAAAGTAATGAGAATGGAAAAAATCACAAATTTATAAAATTTTTTTT---TTTT
chrom ATACAAAATGAGGTGCAAAAAGTAATGAGAATGGAAAAAATCACAAATTTATAAAATTTTTTTAAA---ACTC
right TCTCC---TGACCT-CATGATCCACCCGCTCGGCC---TCCCAAAGTGCTGGGATTACAGGCGTGAACTC
      111*1111***11*1**11*111*111*11*1*111111**1***1*11*1111**111NNN11122*2
```

```
left  T----TTTCTTTTTCTTTTTCTTTTTTTTTTTTTTTTTTTGAGACGGAGTCTCGCTCTGT
chrom CAAAATAACATACACAAAAAGCAAAATCCAGTAGGTTAAAAATATTTTAATCAACT
right CAAAATAACATACACAAAAAGCAAAATCCAGTAGGTTAAAAATATTTTAATCAACT
      22222*22*2*222*2222222222*2222*222*2*2*222*2*2*2222222*
```

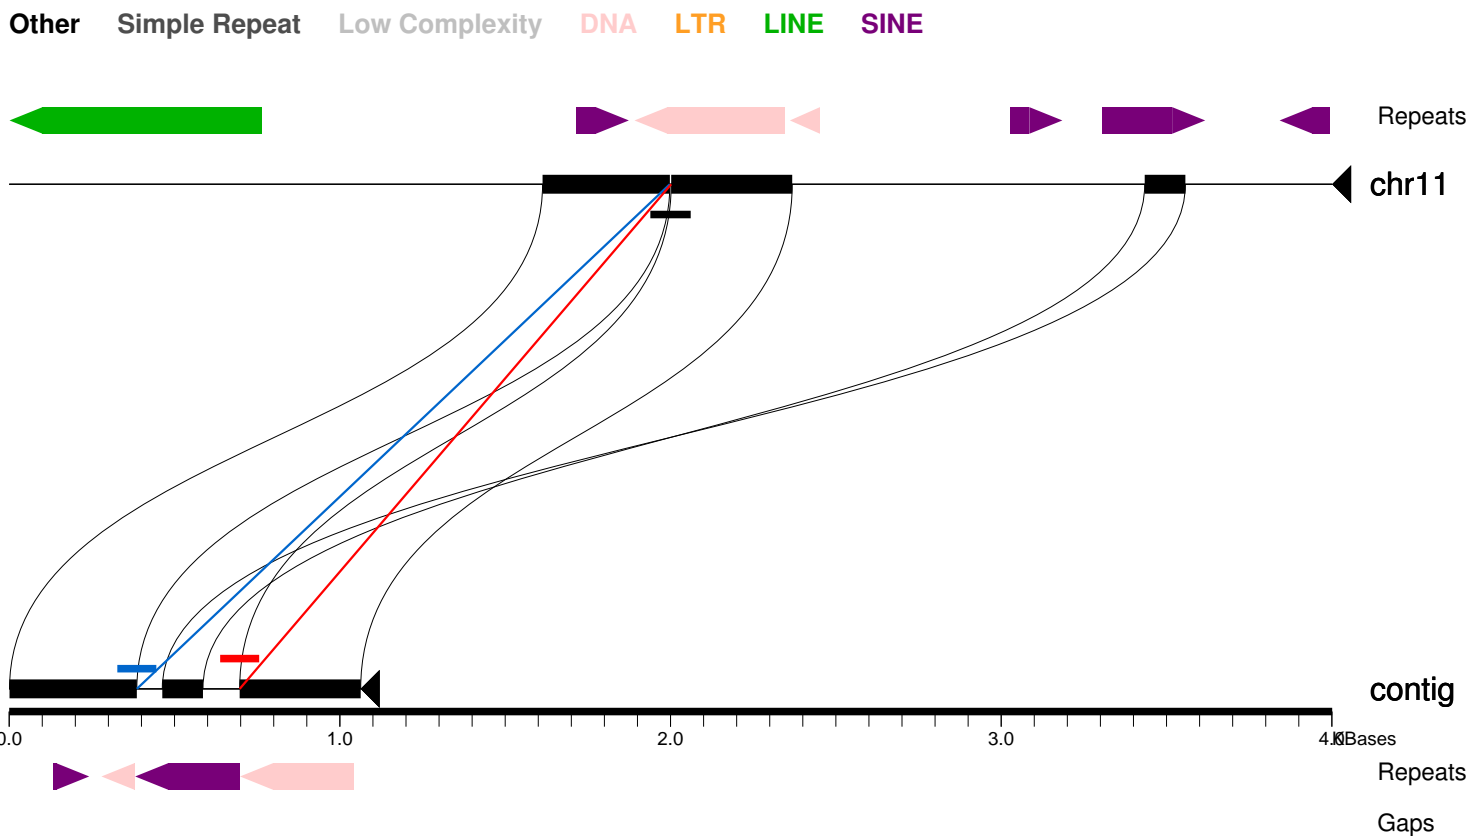

siteID: chr11\_27025232 Scafftig2 - Breakpoint: chr11:27025232

chr11:27025189-27025288

Overlap Length: 17 INS size: 127 Genotyped: Yes

```
left  AT-----GTTCTTT---GGCTGAAA--AAGTTGTGTTTCA----AATACGCCTT-----TGGGATTCCAT
chrom AT-----GTTCTTT---GGCTGAAA--AAGTTGTGTTTCA----AATACGCCTT-----TGGGATTCCAT
right TGCAGTGGTGCATCTAGGCTCACTGCAAGCTCCGCCTCCCGGGTTCACGCCATTCTCCTGCATTCCAT
      11111111**1*11*111****1*1111***1*11*11**11111111*****1*11111**1*****

left  GTATTTTCATTTTTTTTTTTTTTTTTTTTTTTTTTTTTTTTTTTGAGACGGAGTCTCGCTCTGTCGCCAGG
chrom GTATTTTCATGAGCCAGCCTTGACCTCCTCTTCCTG-----GCAGGCTC-CTCA-----
right GTATTTTCATGAGCCAGTCTTGACCTCCTCTTCCTG-----GCAGGCTC-CTCA-----
      *****2*222222N2**2222*22*2**22*222222222*2**2***2***2222222222
```

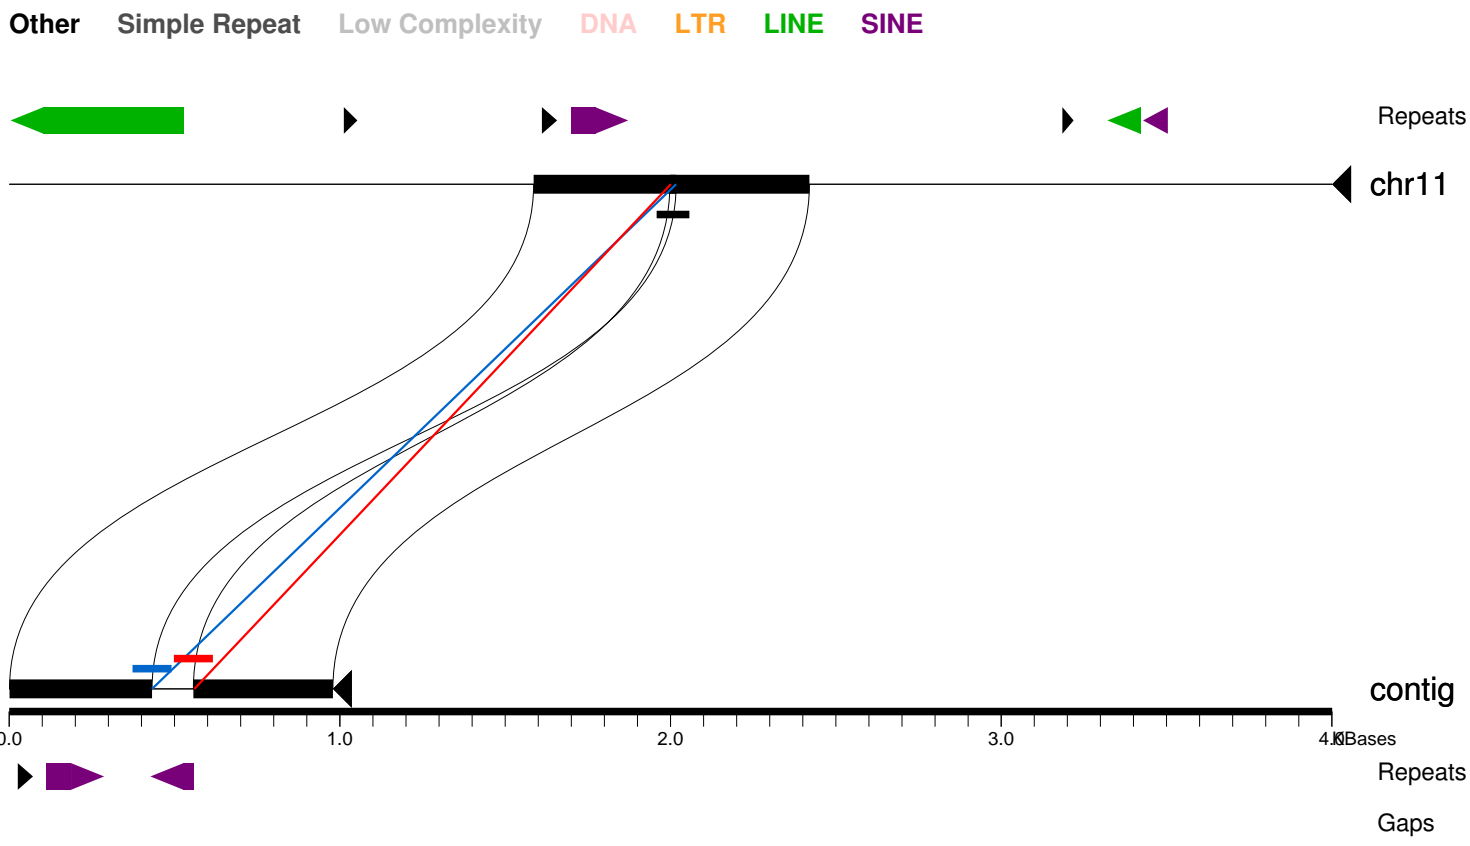

siteID: chr11\_32434282 Scafftig13 - Breakpoint: chr11:32434264

chr11:32434219-32434323

Overlap Length: 15 INS size: 296 Genotyped: Yes

```
left   CTCAGAAAGATTCC--CC-----AGCA--ACGTTTCTCCCAGGGACCCACTTTAAAAATCTAAT
chrom  CTCAGAAAGATTCC--CC-----AGCA--ACGTTTCTCCCAGGGACCCACTTTAAAAATCTAAT
right  CGCCACTGCACTCCAGCCTGGGCGACAGAGCGAGACTCCGTCTCAAAAAAAAAAAAAAAAAAAAAAATACTAAT
      *1*111111*1***11*1111111111***111*1111****11*111*111*1111*****
```

```
left   TTCAGGCCGGGCGCGGTGGCTCACGCCTGTAATCCCAGCACTTTGGGAGGCCGAGGCGGGCGG
chrom  TTCATTTGTTTGGGGGTG----AGG---GAGAAGAAAGTACTTT-----CCGTAAAGTACC-
right  TTCATTTGTTTGGGGGTG----AGG---GAGAAGAAAGTACTTT-----CCGTAAAGTACC-
      ***22222222*2***2222*2*222*22*2222*2*****222222***2222*22*22
```

Other Simple Repeat Low Complexity DNA LTR LINE SINE

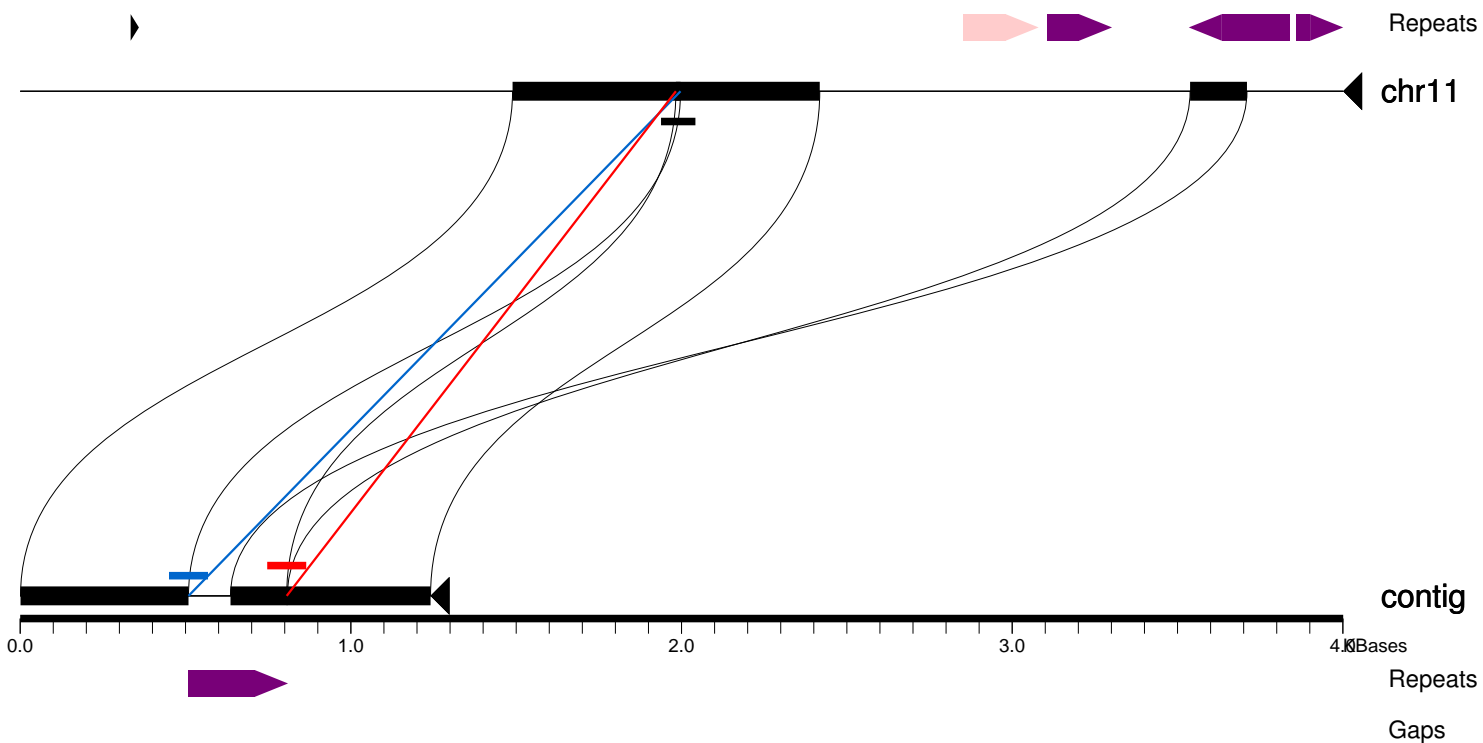

siteID: chr11\_3267817 Scaffitig10 + Breakpoint: chr11:3267797

chr11:3267750-3267856

Overlap Length: 13 INS size: 134 Genotyped: Yes

```
left  GAAAGGCAGGACAACCTTGAAGAAGAGGCTTCCAGGT-----CATAGG--TGGAT-----TCAAAGA
chrom GAAAGGCAGGACAACCTTGAAGAAGAGGCTTCCAGGT-----CATAGG--TGGAT-----TCAAAGA
right TCTCGGCTC----ACTGCAAGCTCCGCCTCCCGGGTTACAGCCATTCTCCTGCCTCAGCCTCCCTCAAAGA
      1111***111111***11***1111*1**1**1***111111***11111***11*11111111***
```

```
left  TTTTC TTTTTTTTTTTTTTTTTTTTTTTTTTTTTTTTTTTGAGACGGAGTCTCGCTCTGTCGCCAGG---CTG
chrom TTTTC TGATTGGCAACTGGTTA-----AAAGAGTTATTATCTAAAGACCTGGAATCAA
right TTTTC TGATTGGCAACTGGTTA-----AAAGAGTTATTATCTAAAGACCTGGAATCAA
      *****22**22222N*22**2222222222222222*22*****22222***222*2**2**222*22
```

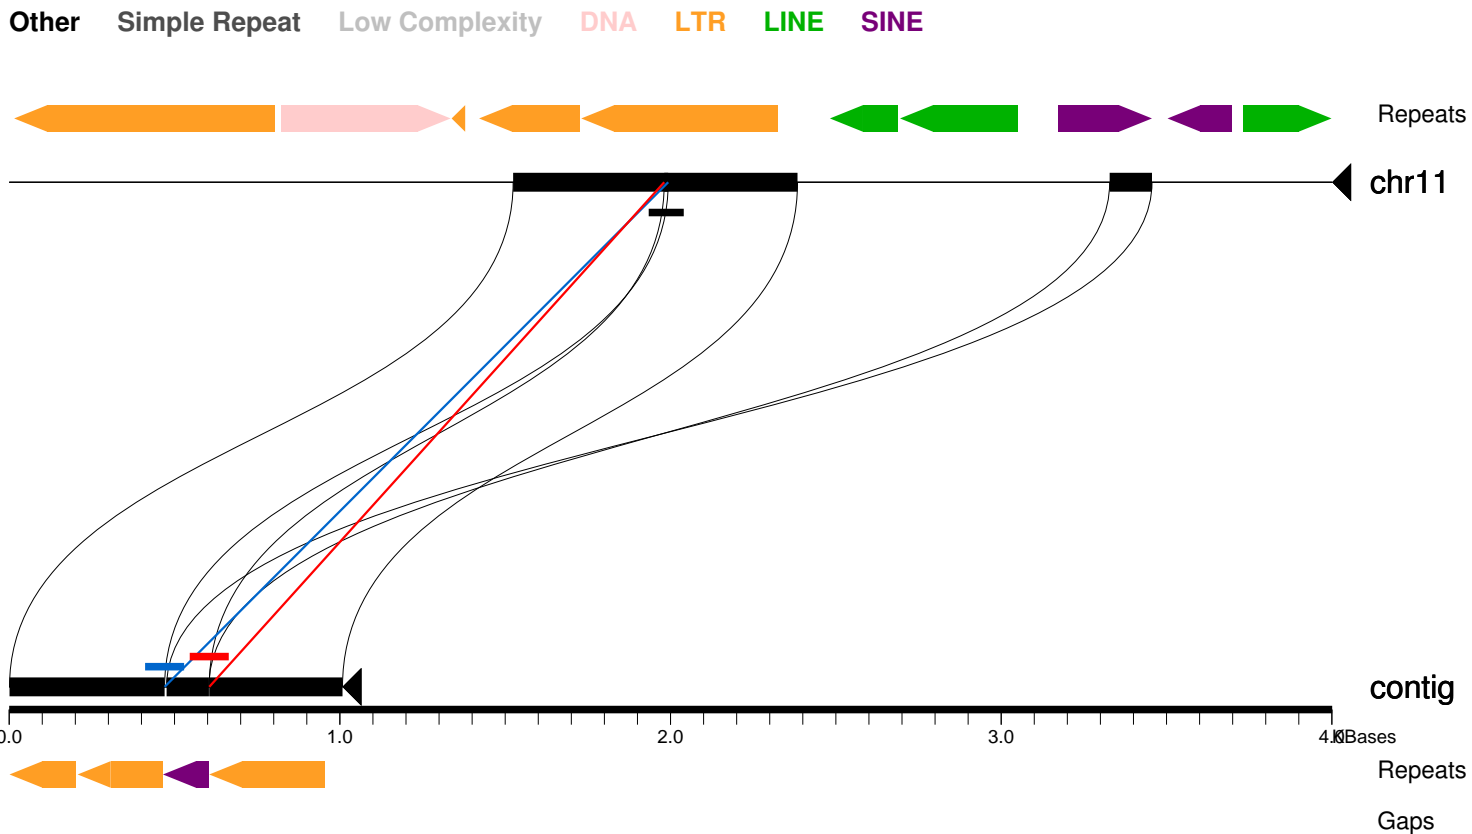





siteID: chr11\_35425496 Scaffig1 + Breakpoint: chr11:35425392

chr11:35425173-35425621

Overlap Length: 98 INS size: 397 Genotyped: Yes

```

left -----
chrom GTCGCATATCCATAAAG-CAGGTC---CTGCTTCCCAGG-GTTCCTATGTTTA-TGCCCAAATAATCTAA
right AT-----TTTTGGTAGAGACGGGTTTCACTGTTGGCCAGGCGGGCCTGGAACTCCTGACCTCATGATCC--
N2      2N2NNN22N2212N222N11222N2NN2222212NN222NNNNN2N122N22NN22N222N

```

```

left -----
chrom GATTGTCTTGAAGGAGAAAACCAGAAATTTCTTGAGGTAAAGAACTCATCCAGTGAAGTCTTTCGGCTGCATG
right GCCCACCTTG-----GCCTCCCAAAGTGTGGGCTTACAGGCGTGAGCCATCGCGCCCGGCCG--GGAAA
2NNNNN2222      2NNN22NN22N2N22N2NNN22N22NNN2N2N222NN2N22N2NN2N2      2N2NN

```

```

left -----AATTTAATGCCCC
chrom CATTTATTTTATTCAACAAAATATCCTGTGATCTTATGACATGAGAAACTCAAGGATTAATTTAATGCCCC
right GTTCCTTTTA---AGCAAACAT-----ATGG-----ACGCATGGATCAGTCCC--TGCTCCG
NN2NNN2222      2N2222N22          222N          22N22N2222N*1*1111***1**1

```

```

left TAACCAGAACTAGAGCCACAGCTGGACAGAATCCTGATTTTCTGTTCCTTAAAGCAAGGGAACATCT
chrom TAACCAGAACTAGAGCCACAGCTGGACAGAATCCTGATTTTCTGTTCCTTAAAGCAAGGGAACATCT
right TGATCACGGCC---GCTCAGCTGCACAGAATCCTGATATTCCTGTCTCCCGCAAACAAGGGAACATCT
*1*1**1111*1111***1*****1*****1*****1***1111**1*****

```

```

left TCATCTTGCTGGCTTGGCTCAGCAGCTTAGCTCAAAGGCAAAAGAGGAAA--CAGCTCAAAGGCAA-AGG
chrom TCATCTTGCTGGCTTGGCTCAGCAGCTTAGCTCAAAGGCAAAAGAGGAAAAGTCCCTCTTAAGCAAACATA
right TCCTCTTGCTGGCTTGGCTCAGCAGCTTAGCTCAAAGGCAAAAGAGGAAAAGTCCCTCTCTAAGCAAACATA
**1*****1*****1*****1*****22*****22*22**2**22*2*22

```

```

left GGGAAAGTCTTTTTTTTTTTTTTTTTTTTTTTTTTTTGGAGACAGAGTCTCACTCTGTGGCCCAAGGCTGGAGTACA
chrom TGGACA--CGTGGATCAGTCTCTGCTCCTC-----CACGGGCGC-CTC-----CTAAGGC---AGT---
right TGGACA--CGTGGATCAGTCTCT-----
2**2*22*2*222*222*2*2*NN1NN1N22222211NN1N1N12111222221NN1111222111222

```

```

left GTGGTGCAATTTTCACTGCAACCTCCGCTCCCGGTTCAAGCGATTCTCTTGCCCT
chrom ---GTGCCCTTTACCAAAAACAACGTTTTTACACCTATTTTAAATTTTGTGCTTGC---
right 2221111NN111NNNNNN1NNN1111N1NNN1NNN11NNN11N11NNNNN1NN1111122

```

Other Simple Repeat Low Complexity DNA LTR LINE SINE

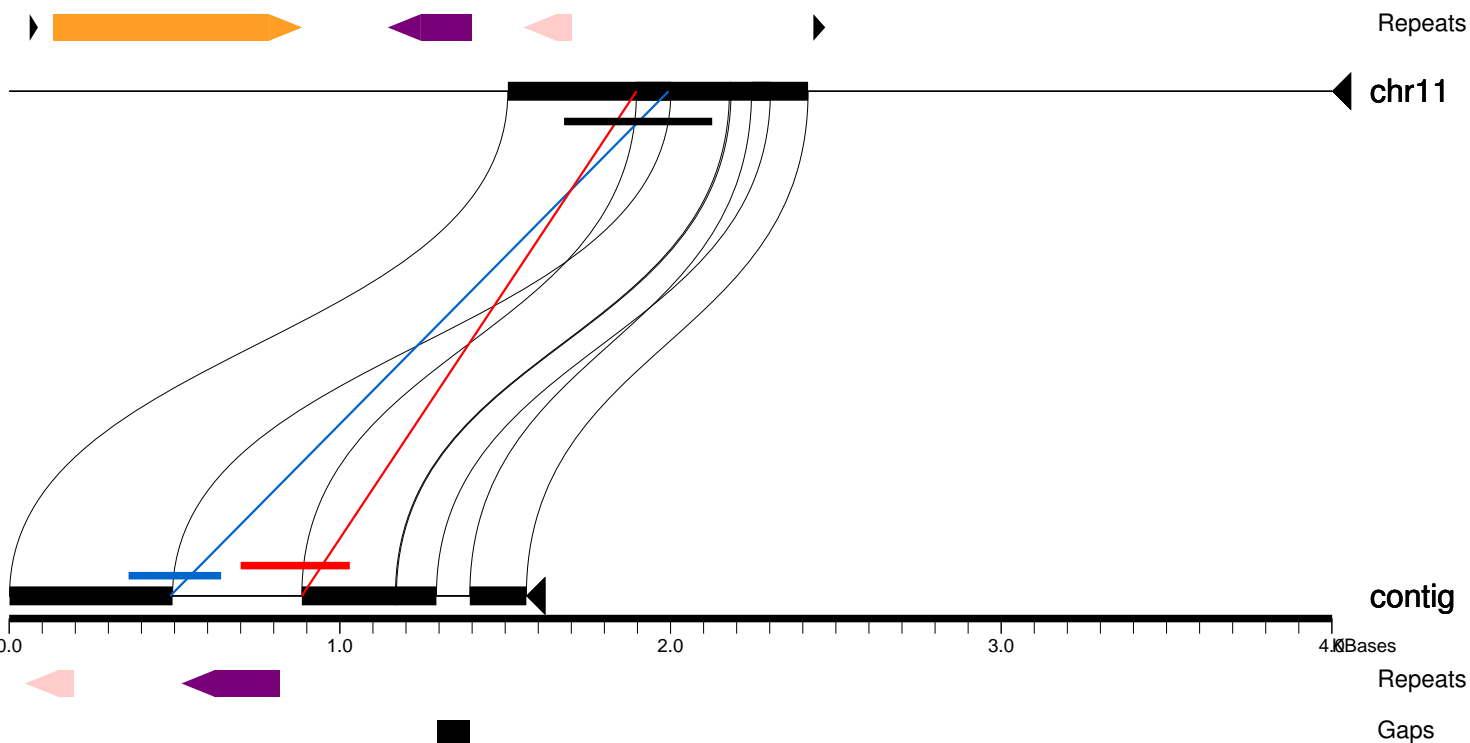



siteID: chr11\_37544621 Scafftig4 - Breakpoint: chr11:37544621

chr11:37544578-37544680

Overlap Length: 17 INS size: 302 Genotyped: Yes

```

left   CTGCATTCCATGTTG-----AAT---TTCCCCAAAAATTCATAAATTTTTTAAAAATTTTG
chrom  CTGCATTCCATGTTG-----AAT---TTCCCCAAAAATTCATAAATTTTTTAAAAATTTTG
right  -TGCAGCTCCAGCCTGGGCGACAGAGCGAGACTCCGTCTCAAAAAAAAAAAAAAAAAAAAAAATAAAATTTTG
1****1****111**1111111111111111*1*111*11*11*****1111*1**111111*****

```

```

left   CTAATTAGGCCGGGCGCGGTGGCTCACGCCTGTAATCCCAGCACTTTGGGAGGCCGAGGCGGGCGG
chrom  CTAATTAAAG-----GATTGCTC---TTTGTACTGGGAGGTTCTGTGGATTTTGACAAA-----
right  CTAATTAAG-----GATTGCTC---TTTGTACTGGGAGGTTCTGTGGATTTTGACAAA-----
*****2*22222222*2*2*****22222*****2*222*2222*22***2222**22222222

```

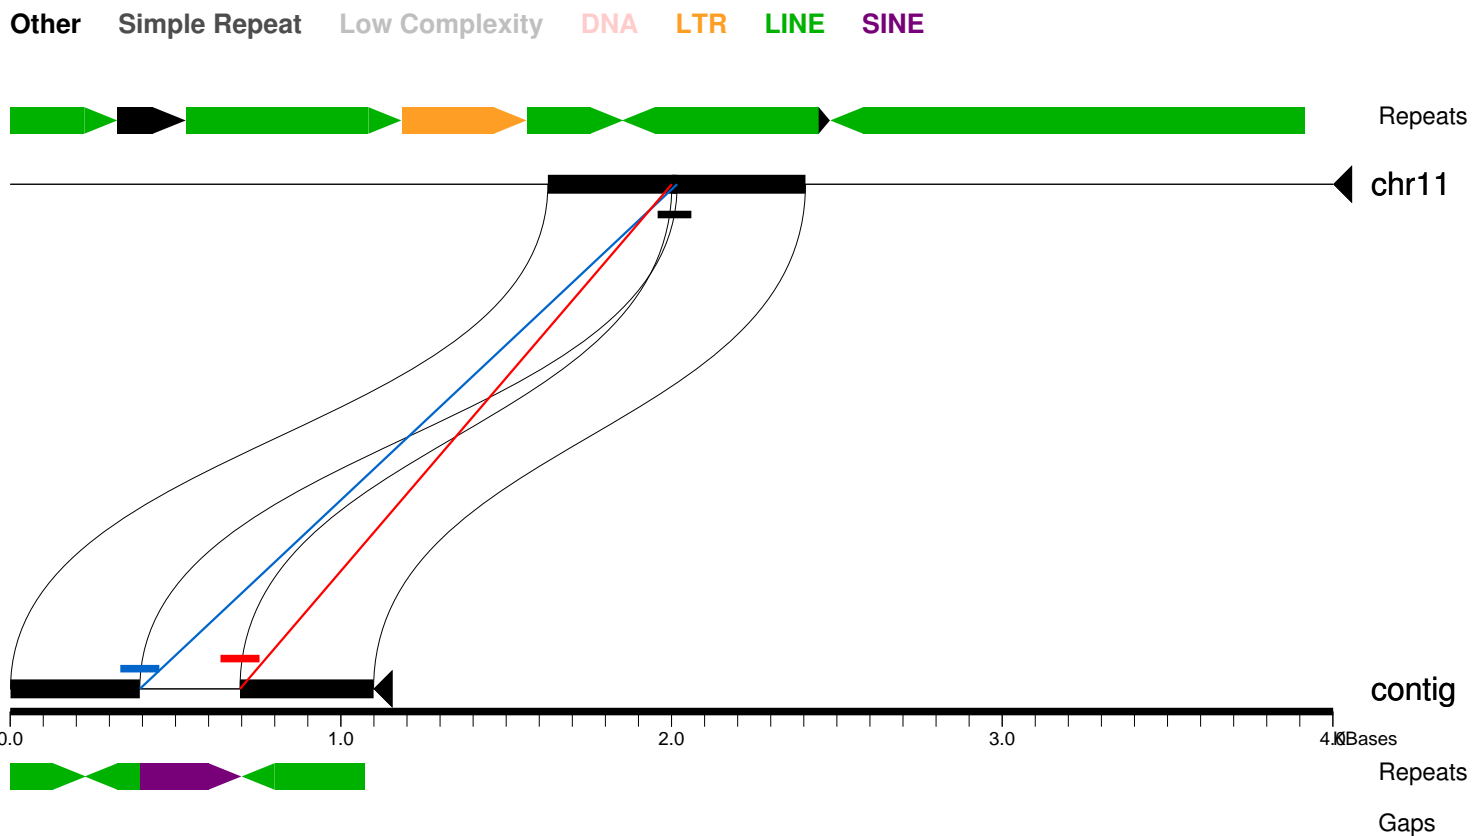





siteID: chr11\_38801064 Scafftig1 + Breakpoint: chr11:38801063

chr11:38800903-38801235

Overlap Length: 13 INS size: 304 Genotyped: Yes

```
left      T-----TACTGGCAGTTTCCAAATATTTGACTGCAGACCCCTCAGGAGAGCTTCCTGCAATATA
chrom    TCGTTGGTCTTCATTACTGGCAGTTTCCAAATATTTGACTGCAGACCCCTCAGGAGAGCTTCCTGCAATATA
right    CAGGAG-----AATGGCGTGAACC-----CGGGAGGCG-----GAGCTTGCAG-----TG
1N2NN2      1*1****11111**111111111*1*1**1*11111111*****1*1*11111*1
```

```
left      AATCTATAAGATATCCCTGTATTCCCTGGTTTTTGTGTTTGTGTTTTCAAATGATTTTCTGTTAATTATAA
chrom    AATCTATAAGATATCCCTGTATTCCCTGGTTTTTGTGTTTGTGTTTTCAAATGATTTTCTGTTAATTATAA
right    AGCCGAGATCCC GCCACTGCACTCCAGCCTGGGCGACAGAG-----CGA--GACTCCGTCTCAAAAAAAAA
*11*1*1*111111*1***1*1***1*11*1111111*11111111*1*11**1*111*1*1**11*1**
```

```
left      CCAAAAATAATTTTGGACTTAGAAAAGTGGTTTATTTGGCC--GGG--CGCGGTGGTTTAC-----GCCT--G
chrom    CCAAAAATAATTTTGGACTTAGAAAAGTGGTTTATTTAACATGGGAACACGCCAACTCAAAGTGTGACTATG
right    AAAAAAAAA-----AAAAAAAAGTGGTTTATTTAACATGGGAACACGCCAACTCAAAGTGTGACTATG
11****1**11111*1111*1**********222*22***22*2**22222***2222222*2**22*
```

```
left      TAATCCCAGCACTT---TGGGAGGC-----CGAGG-----CGGGCGGATCACGAG-----GTCA
chrom    TGTTAACATTTTTTTGACTAGCATGCAAAAATCAAGGACAGGAGTTACGGGAATATGAATGGCATTGTTGTCA
right    TGTTAACATTTTTTTGACTAGCATGCAAAAATCAAGGACAGGAGTTACGGGAATATGAATGGCATTGTTGTCA
*22*22**2222*222*2*2*2**22222*2***22222222222**222**2*222*222222**222**
```

```
left      GGAGAT---CGAGACCATCCCGGCTAAAACG-GTGAACCCCGTCTCTACTAAA
chrom    A-AGATTTTCTCTAATATGCCTGCTTCATTTTGGAGAAAAATATGTATTTGGTAGA
right    A-AGATTTTCTCTAATATGCCTGCTTCATTTTGGAGAAAAATATGT-----
22****222*222*22*2**2**2**22*2222*2****2222**N1N1NN1N1
```

Other Simple Repeat Low Complexity DNA LTR LINE SINE

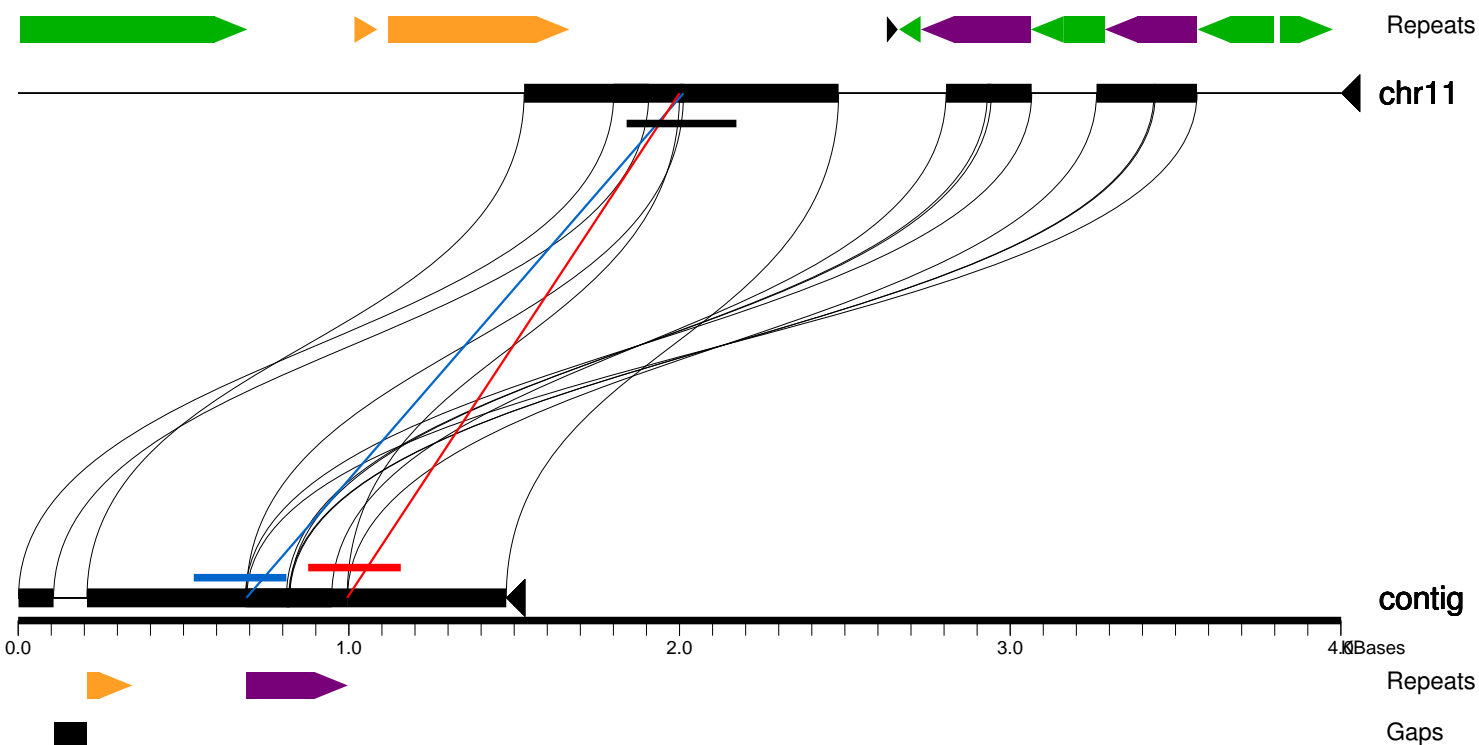









siteID: chr11\_42663733 Scafftig2 + Breakpoint: chr11:42663965

chr11:42663923-42664024

Overlap Length: 18 INS size: 299 Genotyped: Yes

```
left  AGAGTGGGTGGTTGAGGACACCCAG---GATATGATAATA-----CCAAA-----TAAACT
chrom AGAGTGGGTGGTTGAGGACACCCAG---GATATGATAATA-----CCAAA-----TAAACT
right CGCCCGCCTCG-----GCCTCCCAAAGTGCTGGGATTACAGGCGTGAGCCACCGCGCCCGGCCCTAAACT
      1*111*11*1*11111*1*1****1111*1*11***1*1*11111111***1111111111111******
```

```
left  GAACCTTTTTTTTTTTTTTTTTTTTTTTTTTTGGAGACGGAGTCTCGCTCTGTCGCCCAGGCTGGAGTGCAGTG
chrom GAACCTATTTTTTATAT-----GCCAAGAGTGCTTGTTCAC-CTGTCACA---TCTCTTTTTTCCA--
right GAACCTATTTTTTATAT-----GCCAAGAGTGCTTGTTCAC-CTGTCACA---TCTCTTTTTTCCA--
      *****2*****2*2*2222222222222222***22*22*2*2*2*****2*22222*2222*2*2222
```

```
left  G
chrom -
right -
      2
```

Other Simple Repeat Low Complexity DNA LTR LINE SINE

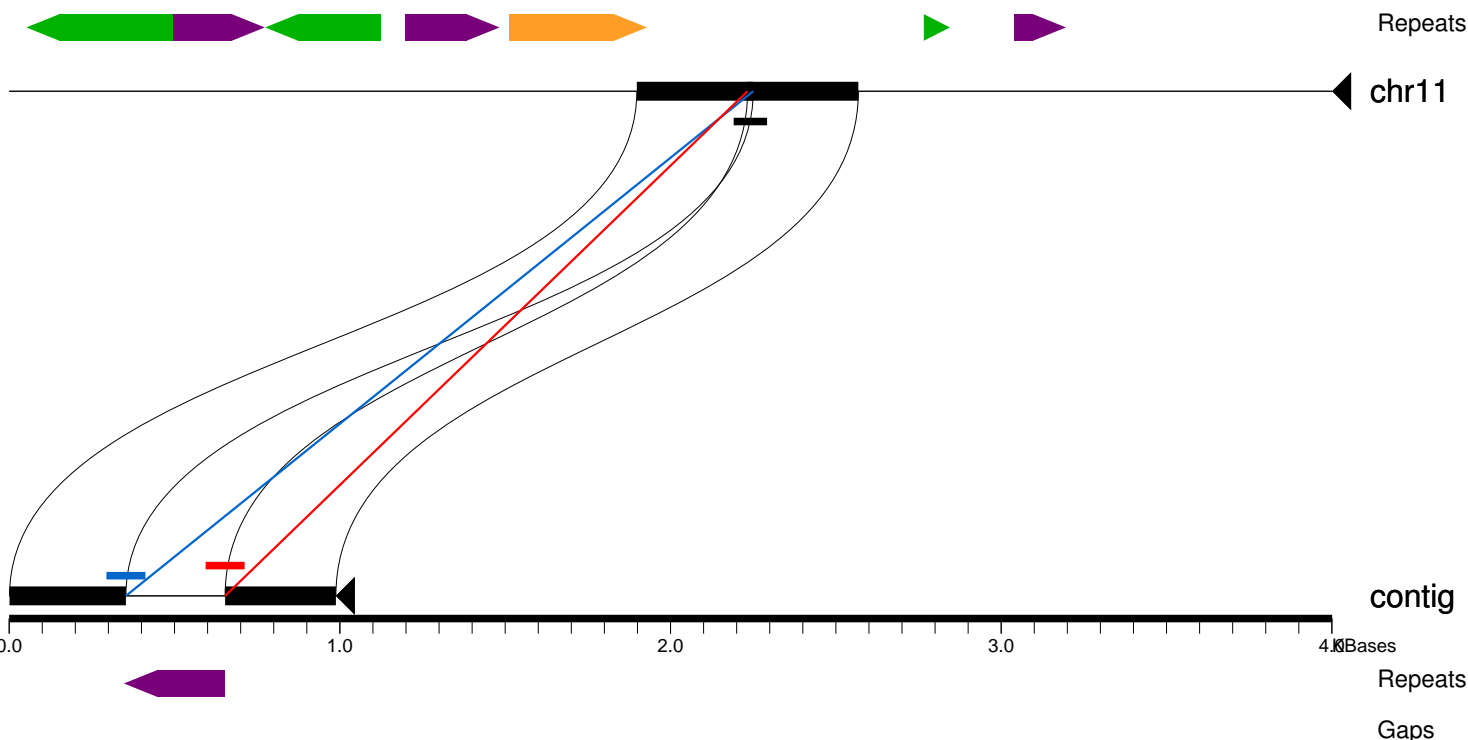

siteID: chr11\_43191327 Scffig2 - Breakpoint: chr11:43191331

chr11:43191284-43191390

Overlap Length: 13 INS size: 303 Genotyped: Yes

```
left  GGATAT-----TAGGAACAATATCACAGGTGGGTGTACACCTTCTGCAGTAT-----AAAGAATAA
chrom GGATAT-----TAGGAACAATATCACAGGTGGGTGTACACCTTCTGCAGTAT-----AAAGAATAA
right TGCAGTCCGCAGTCCGACCTGGGCGACAGA-GCGAG-ACTCCGTCTCAAAAAAAAAAAAAAAAAAATAA
      1*111*111111*11**1*111111****11*1*1*1**1**1**11*11*1111111111***1*****
```

```
left  TGTGGCCGGGCGCGGTGGCTCACGCCTGTAATCCAGCACTTTGGGAGGCCGAGGCGGGTGG
chrom TGTATCTTCTC----TTCCTTTAGCTATTAAG---AACAAATATCACATGGGAAG-----TAT
right TGTATCTTCTC----TTCCTTTAGCTATTAAG---AACAAATATCACATGGGAAG-----TAT
      ***22*2222*2222*22**22**22**22**2222*2**2*2*222*2*222**22222*22
```

Other Simple Repeat Low Complexity DNA LTR LINE SINE

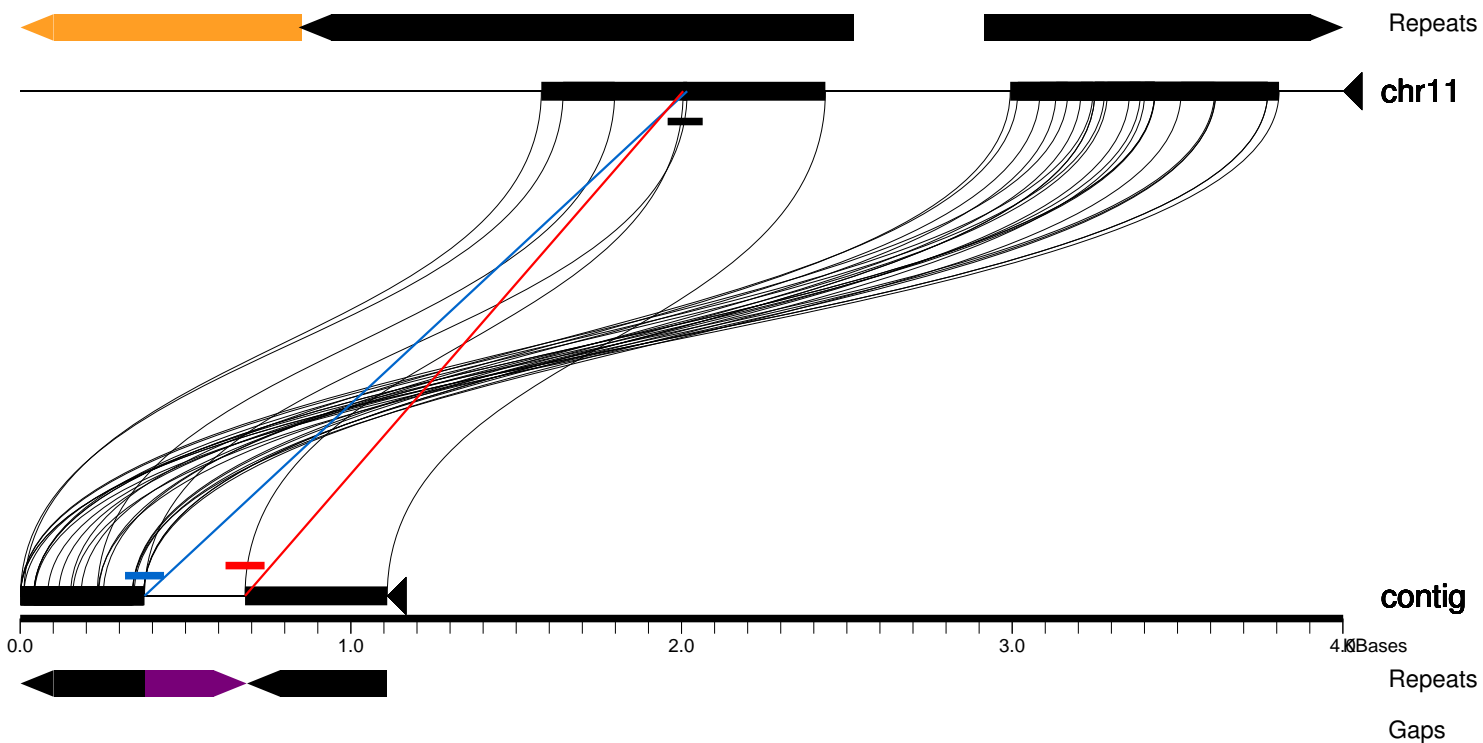



siteID: chr11\_48933131 Scafftig15 + Breakpoint: chr11:48933110

chr11:48933066-48933169

Overlap Length: 16 INS size: 298 Genotyped: Yes

```
left TC-----TGTGAGTTGAA---TGCACACATAACAAAG--AAGTTTCCGAGAATG--CTTCAGTCTAG
chrom TC-----TGTGAGTTGAA---TGCACACATAACAAAG--AAGTTTCCGAGAATG--CTTCAGTCTAG
right TCCACCCGCCTCGGCCTCCCAAAGTGCTGGGATTACAGGCCTGAGCCACCGCGCCCGGCCTTCAGTCTAG
**111111111*11*11*111*111***1111*1***111111*111***1*111*11*****
```

```
left ATTTTTTTTTTTTTTTGGAGACGGAGTCTCGCTCTGTGCGCCAGGTGGGACTGCGGACTGCAGTGG
chrom ATTTTATGTGA-----AGAT--ATTCCCGT----TCGCAAAGGAGGC----CTCAAAGCAGTCC
right ATTTTATGTGA-----AGAT--ATTCCCGT----TCGCAAAGGAGGC----CTCAAAGCAGTCC
***2*2*222222***222*2**2**22222***22***2**22222*22*22*****22
```

Other Simple Repeat Low Complexity DNA LTR LINE SINE

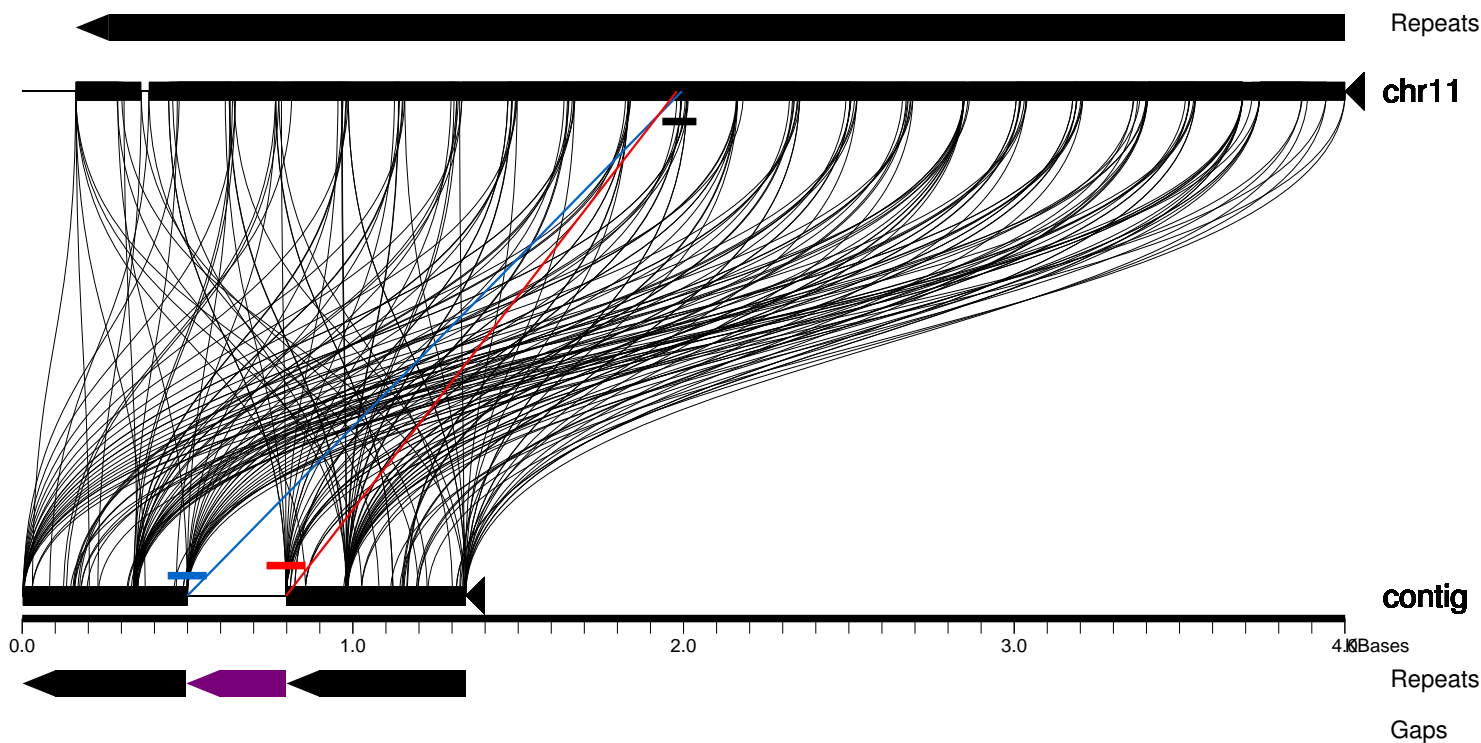

siteID: chr11\_4907929 Scafftig1 + Breakpoint: chr11:4907948

chr11:4907904-4908007

Overlap Length: 16 INS size: 226 Genotyped: Yes

```
left  TATA-----TTTAGTTTCTATCATCTGACCCCAAACAAGGATTAAGGTC-----AAAAGACTTTA
chrom TATA-----TTTAGTTTCTATCATCTGACCCCAAACAAGGATTAAGGTC-----AAAAGACTTTA
right GCCACCGCGCCCGGCTAATTTTTTTGTATTTTTTAGTAGAGACGGGGTTTCACCTTGTTAGAAAAGACTTTA
      111*1111111111111*1*1***1*1*11*1*1*1111*1**11**1**1*11*111111******
left  TTTT*TTTTTTTTTTTTTTTTTTTTTTTTTTTTTTTTTTGAGACGGAGTCTCGCTCTGTCGCCCAGGCC
chrom TTTT*GACAGACAGCCTGTTGG-----CAAACCTCAGAATAAAAAC---CACAACTTA
right TTTT*GACAGACAGCCTGTTGG-----CAAACCTCAGAATAAAAAC---CACAACTTA
      ****22222222222*2**222222222222222*2**22**22*2222*222*2*2222222
```

Other Simple Repeat Low Complexity DNA LTR LINE SINE

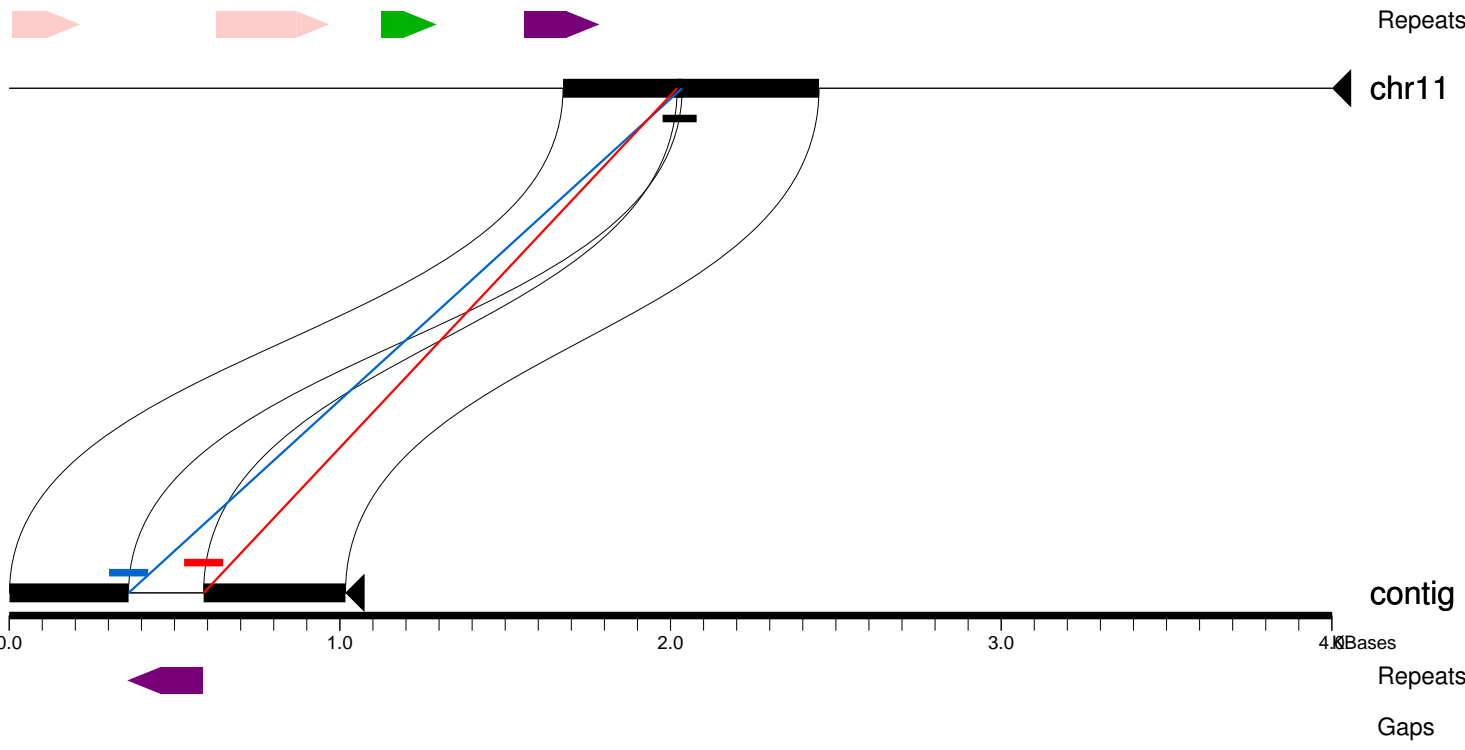





siteID: chr11\_55180360 Scafftig2 - Breakpoint: chr11:55180299

chr11:55180253-55180358

Overlap Length: 14 INS size: 351 Genotyped: No

```
left  ACAA-----GACTCCACAGTTTTTGTGACTTAAAAAC---AATCACCATTTTATT--TTAACTTTAAA
chrom ACAA-----GACTCCACAGTTTTTGTGACTTAAAAAC---AATCACCATTTTATT--TTAACTTTAAA
right CCGCCTGCCTCGGCCTCCCAAAGTGCTGGGATTACAGGCTTGAGCCACCGCGCCCGGCCTTAACTTTAAA
      1*111111111111*1****11*11*11**1**1*11*11*111*11****11111111111******
```

  

```
left  TTTNNNNNNNNNNNNNNNNNNNNNNNNNNNNNNNNNNNNNNNNNNNNNNNNNNNNNNNNNNNNNNNNNNNN
chrom TTTTATGGGCTAGGAATTCAGGCAGTTGCTGGCTGGGTATTTCTTCTGC-----
right TTTTATGGGCTAGGAATTCAGGCAGTTGCTGGCTGGGTATTTCTTCTGC-----
      **22222222222222222222222222222222222222222222222222222222222222222222
```

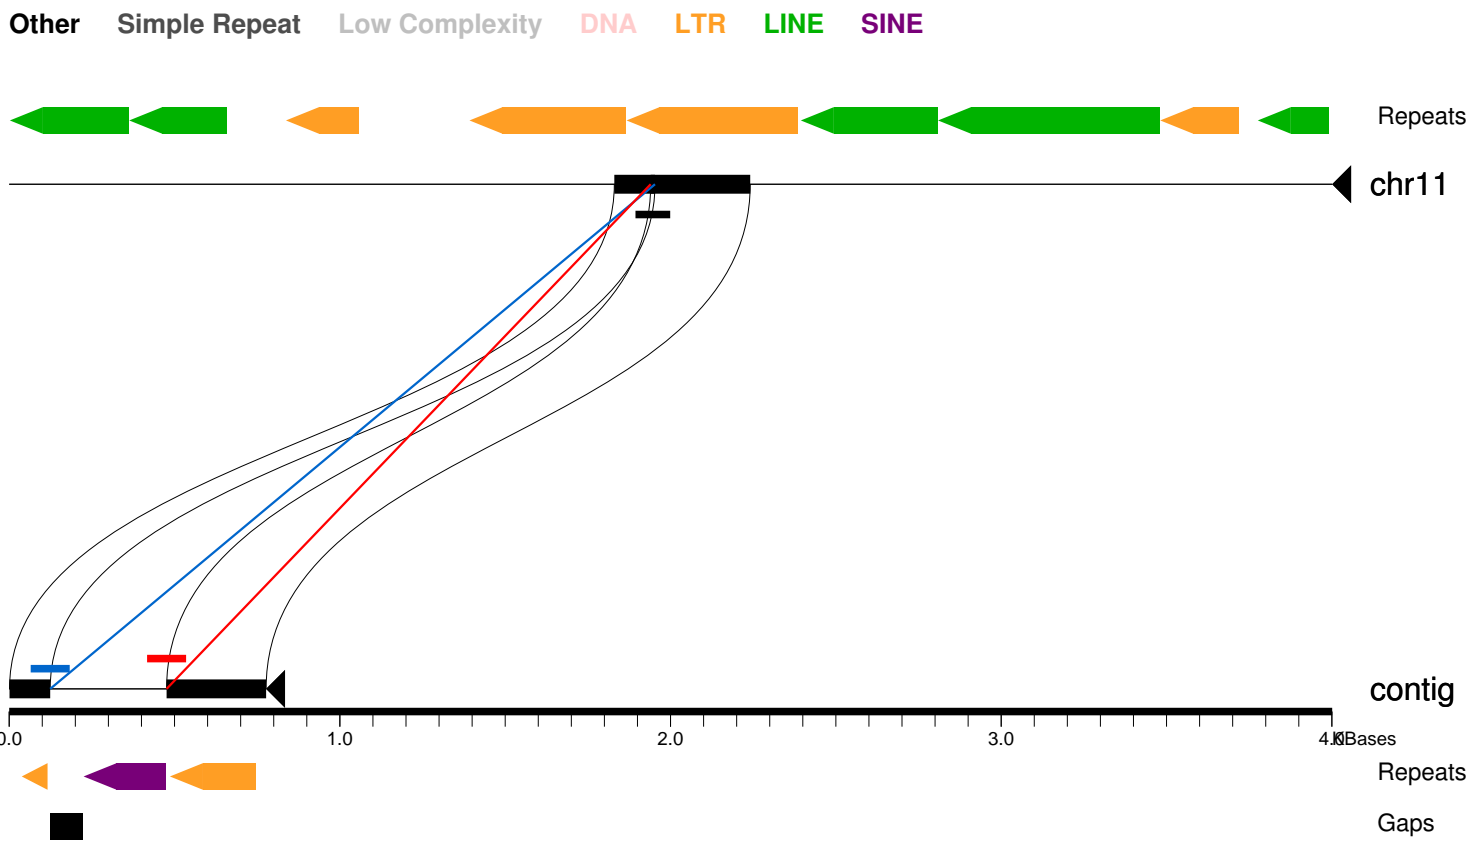



siteID: chr11\_56303337 Scaffoldig4 - Breakpoint: chr11:56303343

chr11:56303304-56303402

Overlap Length: 21 INS size: 300 Genotyped: Yes

```
left  ---AATGCTTCATTGG-----AAGC-ACATTTTTC-----AATGATATACCGAAATAAAAACT
chrom ---AATGCTTCATTGG-----AAGC-ACATTTTTC-----AATGATATACCGAATAAAAACT
right TGC ACTCCAGCCTGGGCGACAGAGCGAAACTCCGCCTCAAAAAAAAAAAAAAAAAAAAAAAAAAAAAA
111*1*1*11*1*1**111111***1*1*111**11111111111**11*1*1*111***1*****
```

  

```
left  TTTACTATAGGCCAGGCGCGGTGGCTCACGCCTGTAATCCCAGCACTTTGGGAGGCCGAGGCGGGCGGA
chrom TTTACTATAGTCTA-----CACCTA-AATC--AGCATTATCTGTCACTGTCTC---CCTC
right TTTACTATAGTCTA-----CACCTA-AATC--AGCATTATCTGTCACTGTCTC---CCTC
*****2*2*22222222222222*2***22***22***22***2*2*22*222*2*222*222*222
```

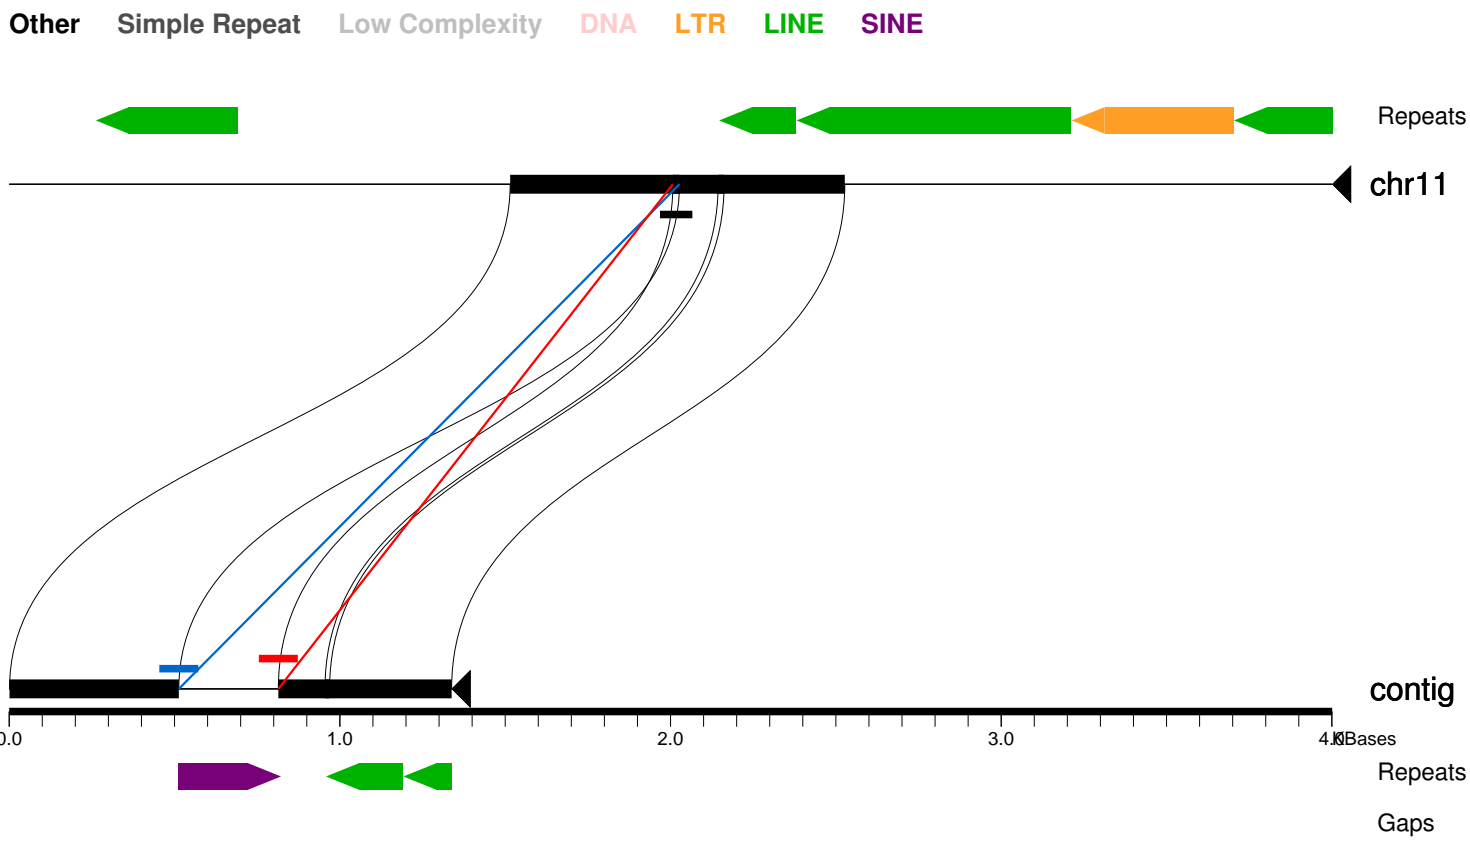

siteID: chr11\_5885143 Scaffold11 - Breakpoint: chr11:5885137

chr11:5885090-5885196

Overlap Length: 13 INS size: 308 Genotyped: Yes

```
left      GATGCTATTTGT-CTATTCAG-GATTTTAA-TCTCTTACTGATTCATTTT-----AAGAGATTGTG
chrom     GATGCTATTTGT-CTATTCAG-GATTTTAA-TCTCTTACTGATTCATTTT-----AAGAGATTGTG
right     ACTCCAGCCTGGGCGACAGAGCGAGACTCCGTCTCAAAAAAAAAAAAAAAAAAAAAAAAAAAGAGATTGTG
            11*1*1111*11*1*111*1*111*111****11*111*111*11111111111111*****
```

```
left      TGGCCGGGCGCGGTGGCTCACGCCGTGAATCCCAGCACTTTGGGAGGCCGAGGCGGGTGA
chrom     TG-CTTCCCAAAAT---TTAAACATTTCTCTCC-AG-ATTTT-----CTCATTTGTGTGAA
right     TG-CTTCCCAAAAT---TTAAACATTTCTCTCC-AG-ATTTT-----CTCATTTGTGTGAA
            **2*2222*2222*222*2*22*2*2*22***2**2*2***222222*22*222*2***2*
```

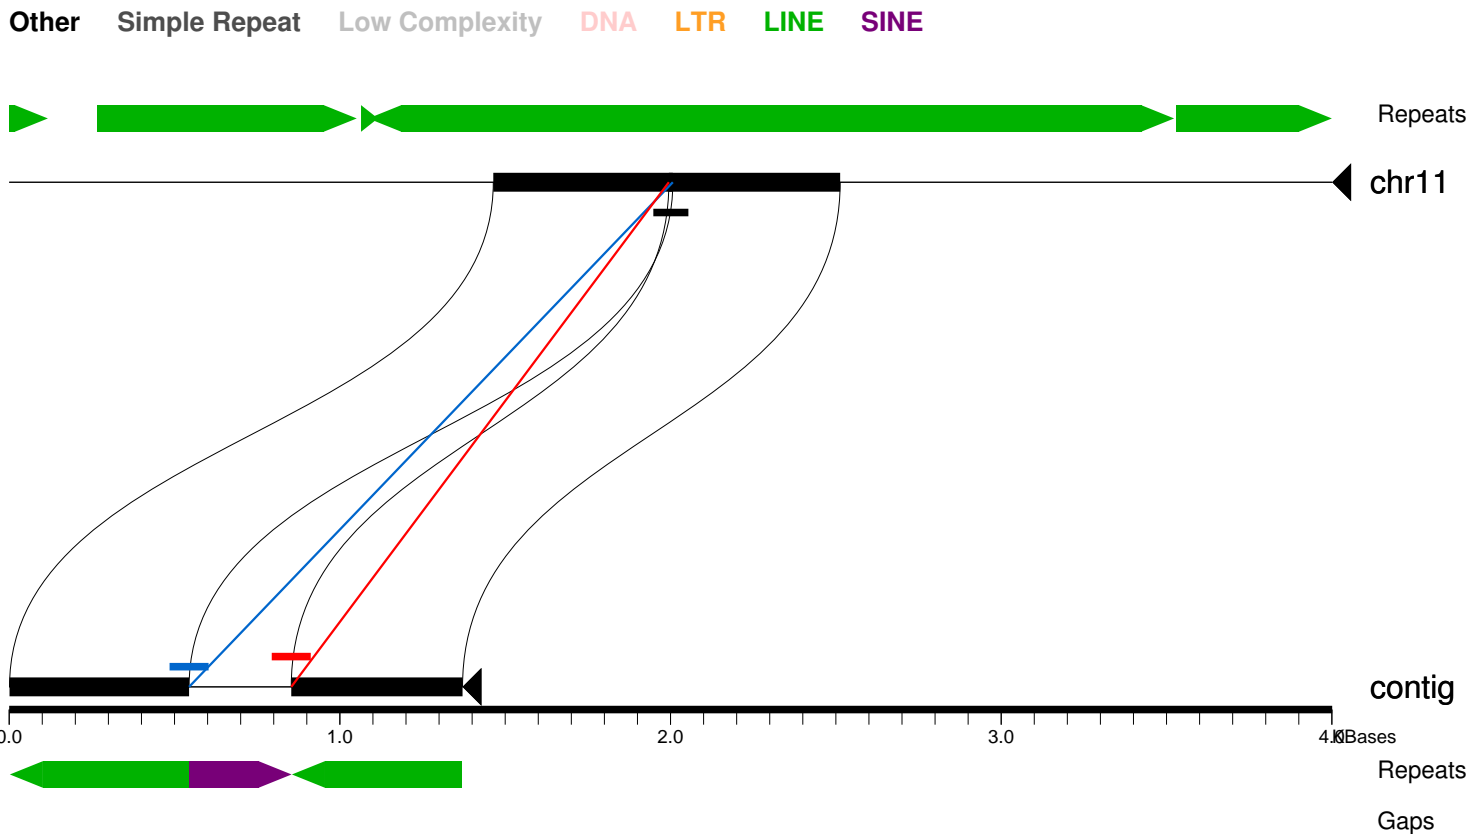

siteID: chr11\_60293399 Scafftig2 - Breakpoint: chr11:60293384

chr11:60293341-60293443

Overlap Length: 17 INS size: 298 Genotyped: Yes

```
left  AATAGTTTTATTTTAATTA---TATTGGCTTTAAATTCAGAATC-----ATAAAAATATTAG
chrom AATAGTTTTATTTTAATTA---TATTGGCTTTAAATTCAGAATC-----ATAAAAATATTAG
right CC-ACTGCAGTCCGCAGTCCGGCCTGGGCGACAGAGCGAGACTCCGTCTCAAAAAAAAAAATAAATATTAG
      111*1*1111*1111*1*111111*1***111*1*111***1**11111111111111*1*****
left  TGGGGCAG--GCCGGGCGCGGTGGCTCACGCCTGTAATCCCAGCACTTTGGGAGGCCGAAGCGGGTGG
chrom TGGGGCAAAAAGACCTTAGCAAAG--TTAATACAA-AATCTCA-CATTTA-----AAGTG-----
right TGGGGCAAAAAGACCTTAGCAAAG--TTAATACAA-AATCTCA-CATTTA-----AAGTG-----
      *****222*2*2222**222*22*2*222*222*****2**2**2**222222222***2*22222
```

Other Simple Repeat Low Complexity DNA LTR LINE SINE

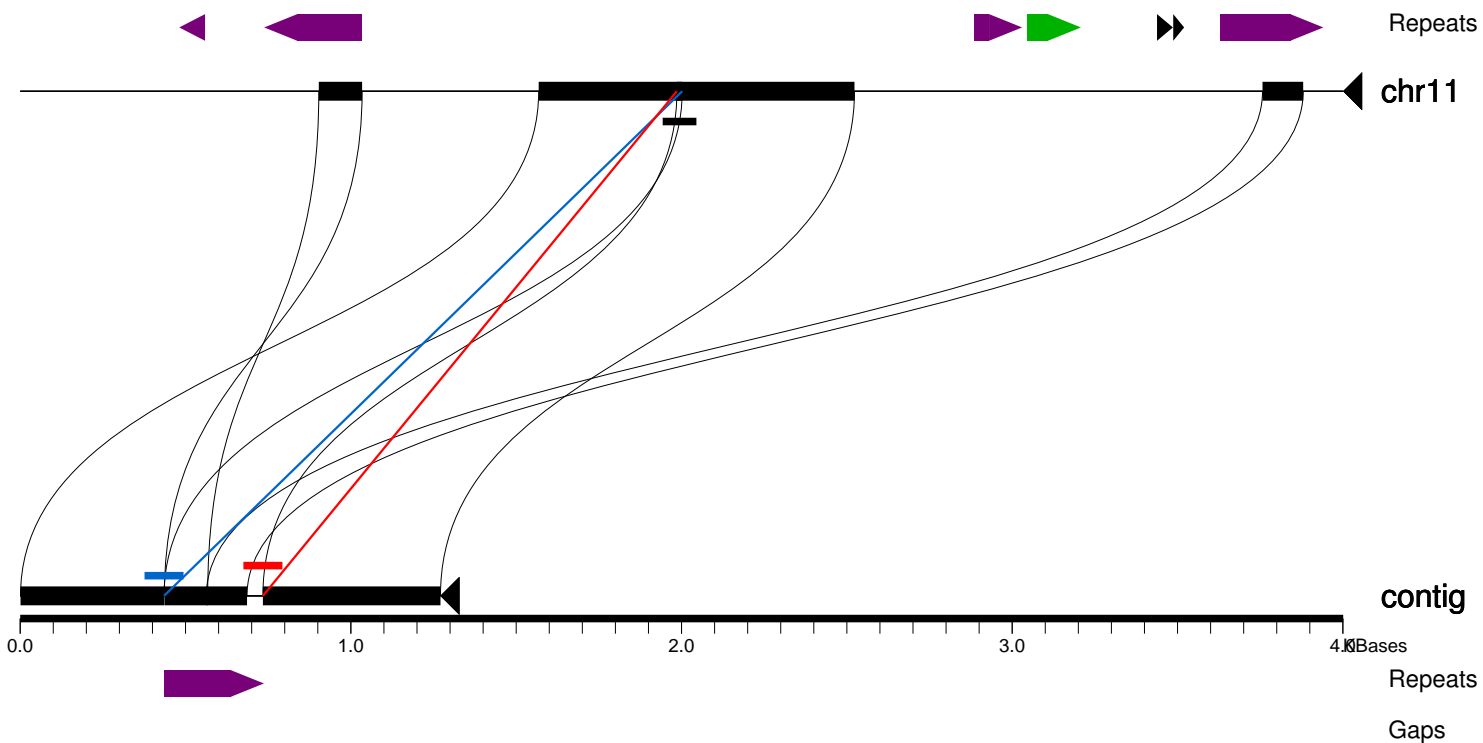



siteID: chr11\_65984320 Scafftig1 + Breakpoint: chr11:65984326

chr11:65984269-65984385

Overlap Length: 3 INS size: 400 Genotyped: No

```
left  GTGGTTGGCTAAGATTTTC--AGT-CTGGGGGTAG-GTTGGCAGCAGCATATTCAGGCCTAGTGNNNNNN
chrom GTGGTTGGCTAAGATTTTC--AGT-CTGGGGGTAG-GTTGGCAGCAGCATATTCAGGCCTACTGGAGACT
right CCGCCCACCTCGGCCTCCCAAAGTGCTGGGATTACAGGCGTGAGCCACCGCGCCCGGCC--GTGGAGACT
      11*111111**11*11*11*11***1*****11**11*11*11***11*111111*1****11***222222
```

```
left  NNNNNNNNNNNNNNNNNNNNNNNNNNNNNNNNNNNNNNNNNNNNNNNNNNNNNNNNNNNNNNNNNNNNN
chrom TCTTAAAATCAACACAGGGTCATCCCTTCAACGATTCCAATGAACGCTCTA--
right TCTTAAAATCAACACAGGGTCATCCCTTCAACGATTCCAATGAACGCTCTA--
      222222222222222222222222222222222222222222222222222222222222222222222222
```

Other Simple Repeat Low Complexity DNA LTR LINE SINE

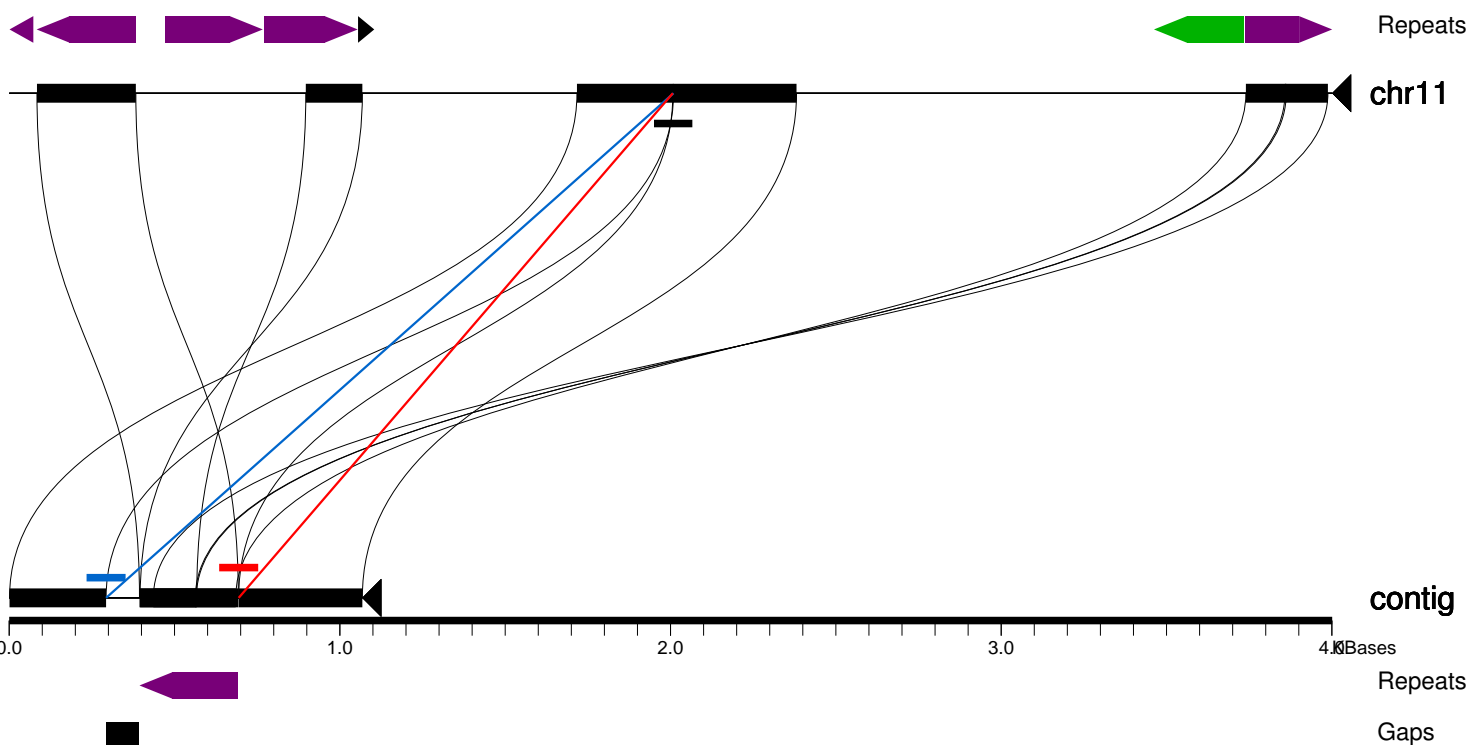





siteID: chr11\_7092799 Scaffitig13 - Breakpoint: chr11:7092789

chr11:7092741-7092848

Overlap Length: 12 INS size: 331 Genotyped: Yes

```
left  AAGCATAAAAC-TCTCTGAAAAGTATGTTTTTAATTGGATACAGAGCTT-----AAGAATGCAGG
chrom AAGCATAAAAC-TCTCTGAAAAGTATGTTTTTAATTGGATACAGAGCTT-----AAGAATGCAGG
right AGCGAGACTCCGTCTCAAAAAAAAAAAAAAAAAAAAAAAAAAAAAAAAAAAAAAAAAAAGAATGCAGG
      *111*1*111*1****11****11*11111111**1111*1*1*1*11111111111111******
```

```
left  TGGCCGGGCGCGGTGGCTCACGCCTGTAATCCCAGCACTTTGGGAGGCCGAGGCGGGTG----G
chrom TAA--GGG-----AAGCCTGGA-TATGAGG-CTGGAGGATGCAGACAGGGAAGATCAG
right TAA--GGG-----AAGCCTGGA-TATGAGG-CTGGAGGATGCGGACAGGGAAGATCAG
      *2222***222222222222*2*****2*2*222**22**222***2*N**222**22*2222*
```

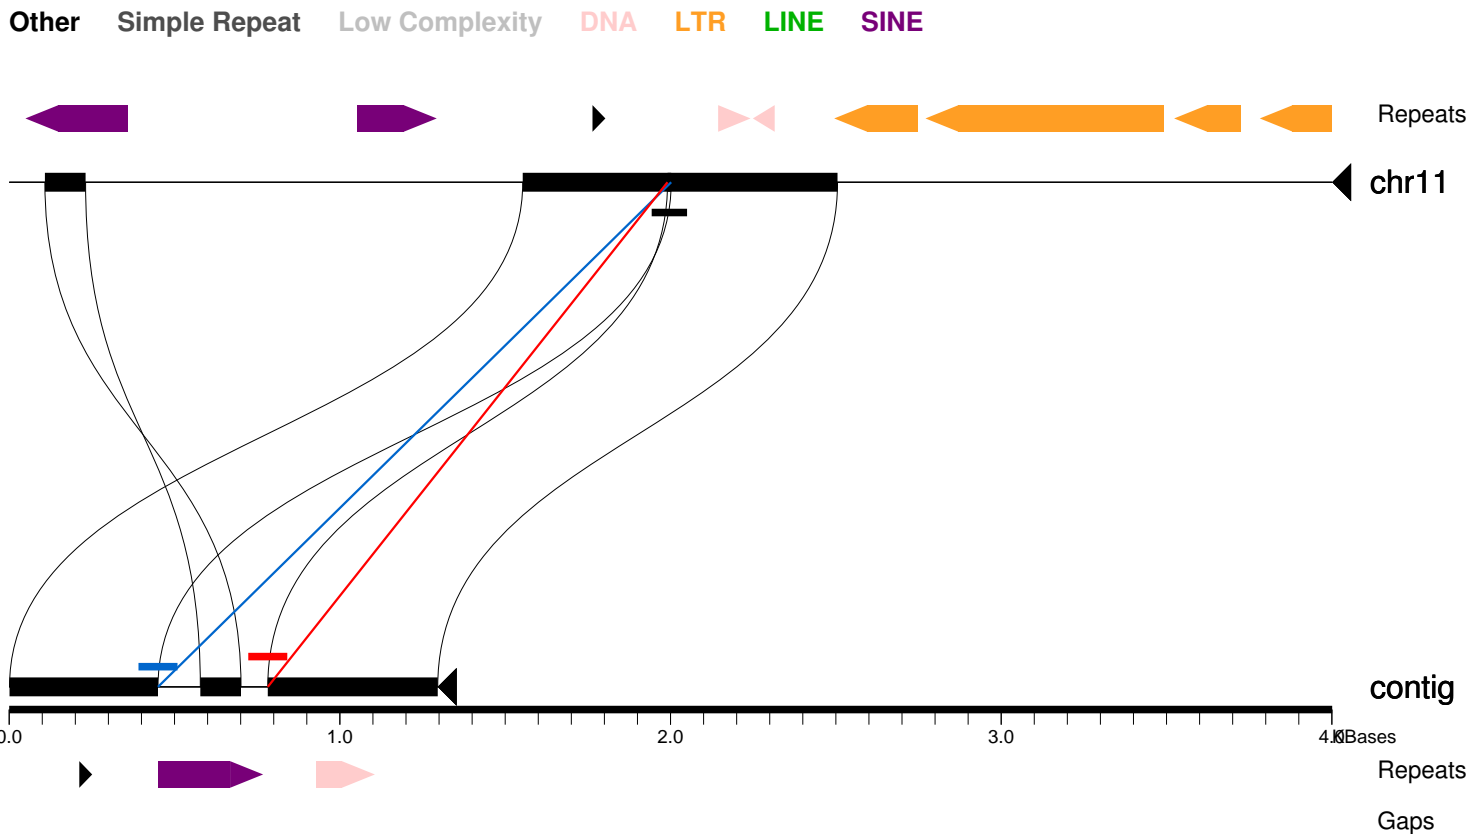





siteID: chr11\_7612704 Scaffitig9 + Breakpoint: chr11:7612688

chr11:7612528-7612857

Overlap Length: 10 INS size: 309 Genotyped: Yes

```
left -----CTAGGTGGCTCCGTGTCCATGTGGACTTCGGCACTGGGGTTCTACCTGCAGAGCTTCACT
chrom GCTGCCAGTGTAGGTGGCTCCGTGTCCATGTGGACTTCGGCACTGGGGTTCTACCTGCAGAGCTTCACT
right -----AGAA-----TGGC-----GTGAACCCAGGAAGCGGAGCT-----TGCAGTGAGCC---
      22NN11111****111111111111****1**111**1*11**1*1*11111*****1*111*111
```

```
left TGGACACCTGGGTCCGTGTTTAATTCTCTGTCC--ACTGGAAATCACCATCATGTGAGTTCTTTGACAGAG
chrom TGGACACCTGGGTCCGTGTTTAATTCTCTGTCC--ACTGGAAATCACCATCATGTGAGTTCTTTGACAGAG
right --GAGA--TTGCGCCACTGCAGTCCGCAGTCCGGCCTGGG---CGACAGAGCGAGACTCCGTCTCAAAAA
      11**1*11*1*11**11*11*1*1*1*1****111****1111*11**1111*1**1*1*1*1111*1*1
```

```
left AAGAAGTTGACCTGCTATTAAGAATTATTTCTCGGCCGGGCGCGG---TGGCTC-----ACGCCTGTAATC
chrom AAGAAGTTGACCTGCTATTAAGAATTATTTCTCGGCCGGGCGCGG---TGGCTC-----ACGCCTGTAATC
right AAAAAAAAAA-----AAAAAAATTATTTCTCTACCTTTTCTTCTCTGGTTCTGAGAAAAATATAGATTA
      *****A*****222*22222*22222***2**22222*2222*22*2*2*
      **1**1111*111111*11**1*****222*22222*22222***2**22222*2222*22*2*2*
```

```
left CCAGCACTTTGGGAGGCCGAGGCGGG----TGGATCATG--AGGTCAGGAG-----ATCGAGACCA
chrom TAATATATTCTTGGATTCTAGTCAGAGAATTTGATCATGTGAGAACCAGGAATATTAATTTAACAAACAATA
right TAATATATTCTTGGATTCTAGTCAGAGAATTTGATCATGTGAGAACCAGGAATATTAATTTAACAAACAATA
      22*2222**222*2222*2**2*2*22222*2*****22**22*N***2222222222*2*2*2*22*
```

```
left TCCTGGC--TAACAAGG-----TGA-----AACCCGTCCTACTAAA
chrom AACTGCCATTAACAAAGAAGTCAGTTGTGATTGTTAAGGTTCTTTGT-CTGTG
right AACTGCCATTAACAAAGAAGTCAGTTGTGATTGTTAAGGTTCTT-----
      22**2*22*****2*2222222222***22222**22222*21N1211NNN
```

Other Simple Repeat Low Complexity DNA LTR LINE SINE

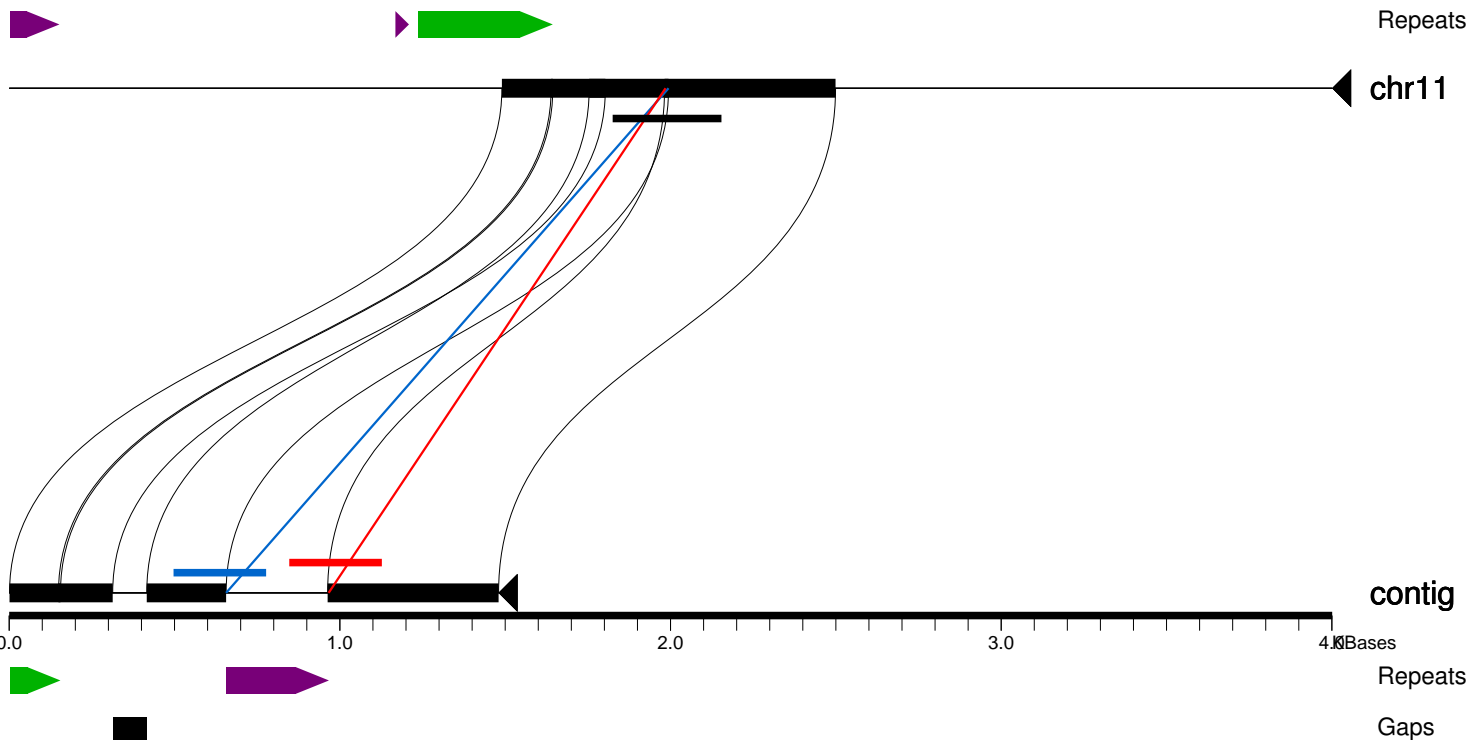

siteID: chr11\_76990505 Scafftig1 - Breakpoint: chr11:76990571

chr11:76990526-76990630

Overlap Length: 15 INS size: 299 Genotyped: Yes

```
left  AGA----TAAGGCATAAGCAAATGTAGGGA-----GATAAAAAGAAGCAGTGTGTGAACAGCAGC
chrom AGA----TAAGGCATAAGCAAATGTAGGGA-----GATAAAAAGAAGCAGTGTGTGAACAGCAGC
right CGCCCGTCTCGGCCTCCCAAAGTGCTGGGATTACAGGCGTGAGCCACCGCGCCCGGCCCTGAACAGCAGC
      1*111111111***1*1111**1**11****1111111111**111*11*111*1*1111*****
```

```
left  TTTTTTTTTTTTTTTTTTTTTTTTGAGACGGAGTTTCGCTCTGTTGCCAGGCTGGAATGCAGTG
chrom TTTTTCGGGATAAATTATAT----GAG---GAGTTTTAAAGTTGTGTTCTGTAGGCAA-----
right TTTTTCGGGATAAATTATAT----GAG---GAGTTTTAAAGTTGTGTTCTGTAGGCAA-----
      ***22222*22**2*2*2222***222*****22222*22**22*2*222*2**2222222
```

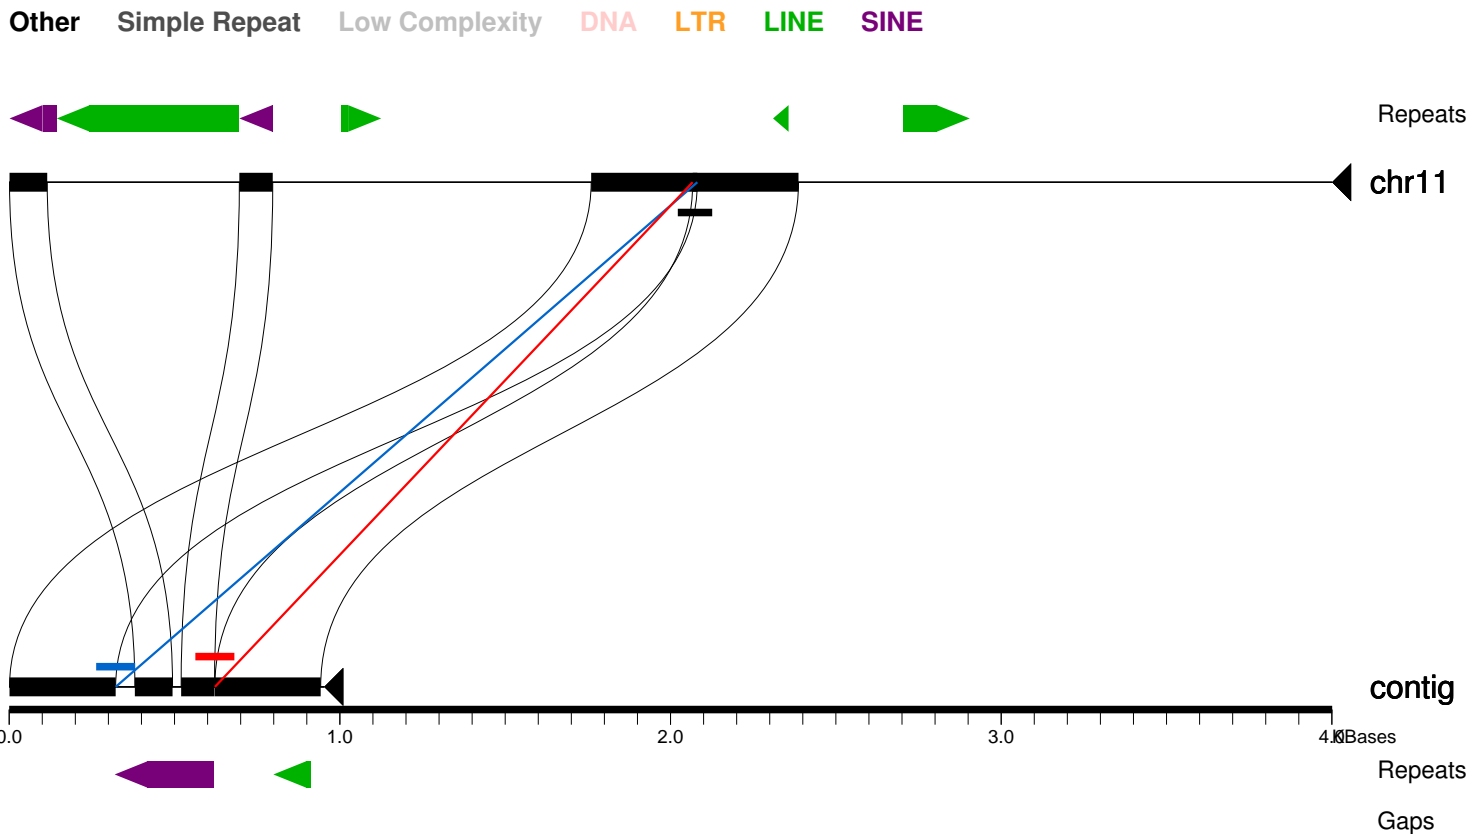

siteID: chr11\_79191609 Scafftig1 + Breakpoint: chr11:79191615

chr11:79191568-79191666

Overlap Length: 13 INS size: 312 Genotyped: Yes

```
left  ----CCATGATTTT-----TGATTAGGTTATAT---TTATTTATGATTTTGGCCCATTAAA
chrom ----CCATGATTTT-----TGATTAGGTTATAT---TTATTTATGATTTTGGCACATTAAA
right TGATCCACCCGCCTCGGCCTCCCAAAGTGCTGGGATTACAGGCGTGAGCCACCGCGCCCGCCCT-AAA
      1111***111111*1111111111111111**1*11*1***1*1111*1*111*111111111***N*1*1***
```

```
left  GGGTTTTTTTTTTTTTTTTTTTTTTTTTTTTTT-GAGACGGAGTCTCGCTCTGTGCGCCAGGCCGACTGCG
chrom GGGCTTTTTTAAAAA-----AAAAAAA-GAGAAGAAATC-----CTGAGAATCAG-----CTTTG
right GGGCTTTTTTAAAAA-----AAAAAAAAGAGAAGAAATC-----CTGAGAATCAG-----CTTTG
      ***2*****22222222222222222222221****2*2*2**22222***22222***222222**22*
```

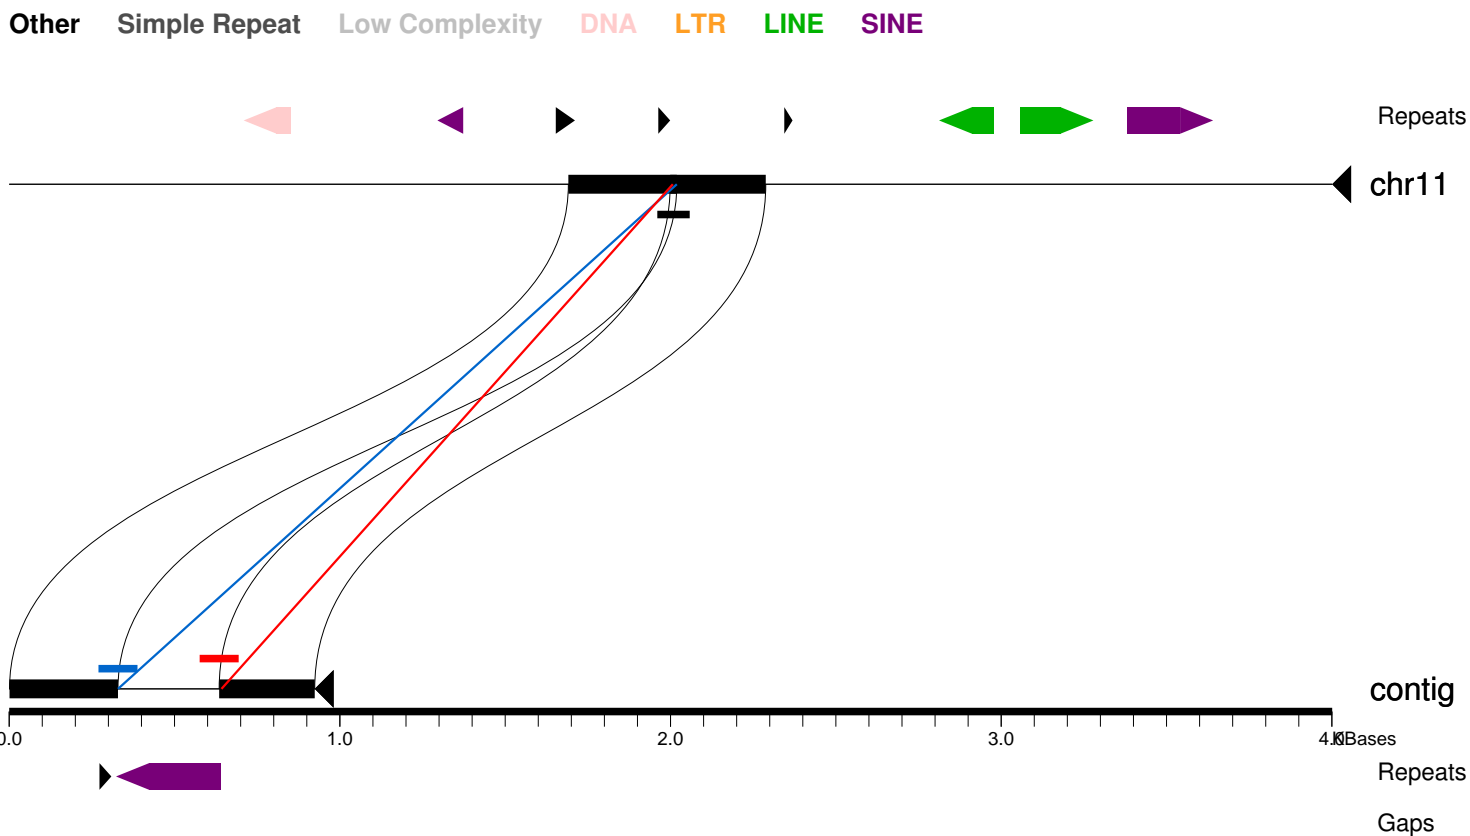

siteID: chr11\_81283888 Scafftig4 + Breakpoint: chr11:81283868

chr11:81283825-81283927

Overlap Length: 17 INS size: 300 Genotyped: Yes

```
left  ATTCCTAAATTC-----AGTGCA--AAATAATGTTATCAACTA--GTTCCC--CAATATTTCAACT
chrom ATTCCTAAATTC-----AGTGCA--AAATAATGTTATCAACTA--GTTCCC--CAATATTTCAACT
right CCACCCGCCTCGGCCTCCCAAAGTGTCTGGGACTACAGGCGTGAGCCACCGCGCCCGGCCATATTTCAACT
      111*111111**111111111111*****1111*1**11*111*1*1*1*11*11***11*1*****
```

```
left  TCTTTTFTTTTTTTTTTTTTGAGACGGAGTCTCGCTCTG-TCGCCCAGGCCGGACTGCGGACTGCAGT
chrom TCTTTTAC-----AGGCTGCATGGCTTTCTACTTGCTCTTGCTCGCTT--AGAC----GA
right TCTTTTAC-----AGGCTGCATGGCTTTCTACTTGCTCTTGCTCGCTT--AGAC----GA
      *****22222222222222**2*2*22*22*22***22*2**2*22**22*22*222***2222*2
```

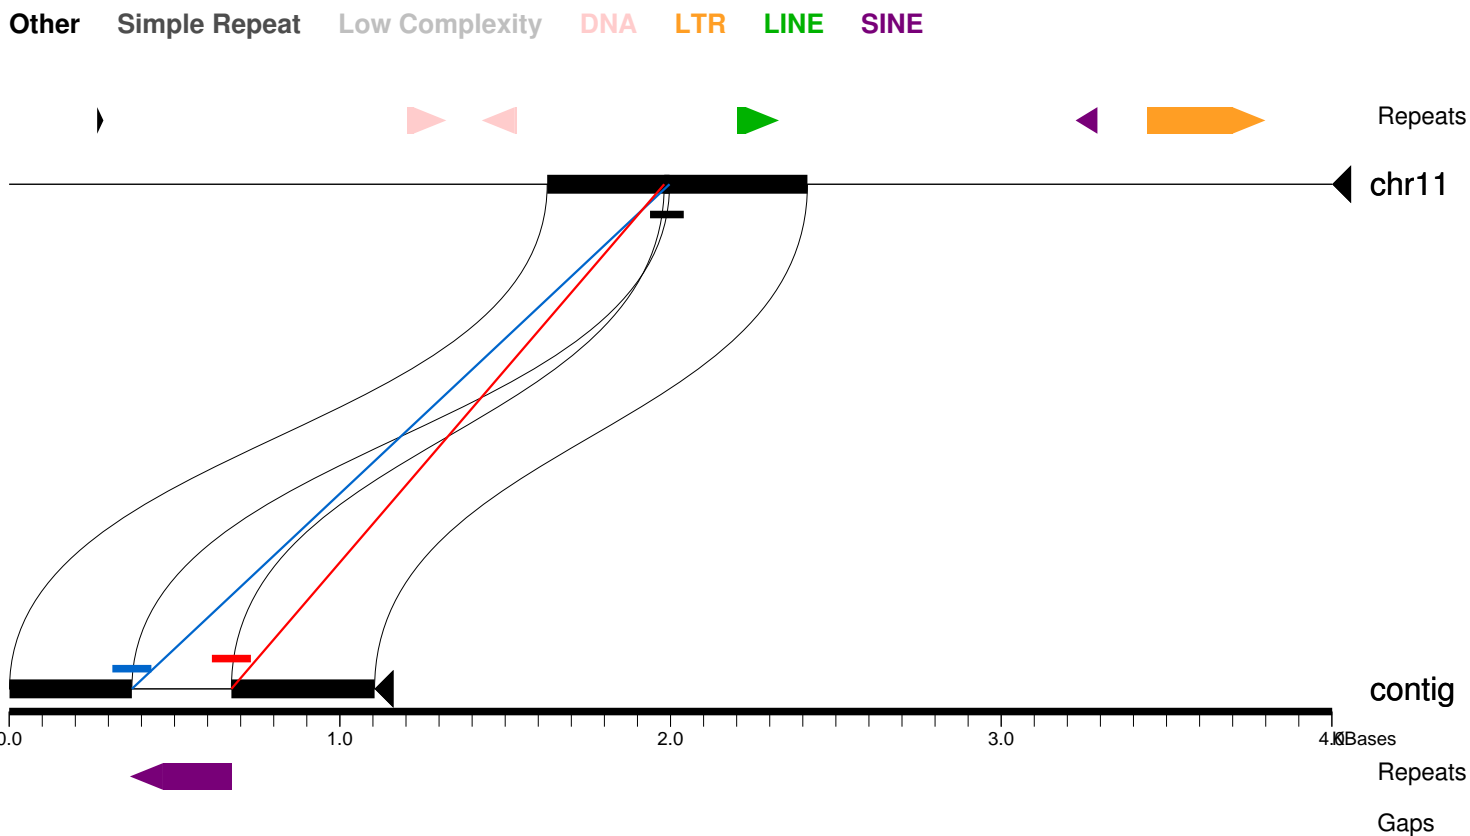

siteID: chr11\_84701707 Scafftig4 - Breakpoint: chr11:84701717

chr11:84701672-84701776

Overlap Length: 15 INS size: 312 Genotyped: Yes

```
left  -----GAAA-----TGCAAATTA AAAACCATGATGAGATAACCACCACATACCTATTAAAAATTCAT
chrom -----GAAA-----TGCAAATTA AAAACCATGATGAGATAACCACCACATACCTATTAAAAATTCAT
right CCTGGGCGACAGAGCGAGACTCCGTCTCAAAAAAAAAAAAAAAAAAAAAAAAAAAAAAAAAAAAA--AAAAATTCAT
      11111111**1*1111111111*1*111*1****11*11*11*1*1*11*11*1*1*111*11*****
```

```
left  AAAATAAGGCCGGGCGCGGTGGCTCACGCCTGTAATCCCAGCACTTTGGGAGGCCGAGGCGGGCGG
chrom AAAATAAGAAG-----TAGCGACAGCACTAAATGCTGGAA----AGAATGCAGAGAAACT---
right AAAATAAGAAG-----TAGCGACAGCACTAAATGCTGGAA----AGAATGCAGAGAAACT---
      *****2*22*2222222*2**2222**2222***2*22*2*22222*2*2**2***22222222
```

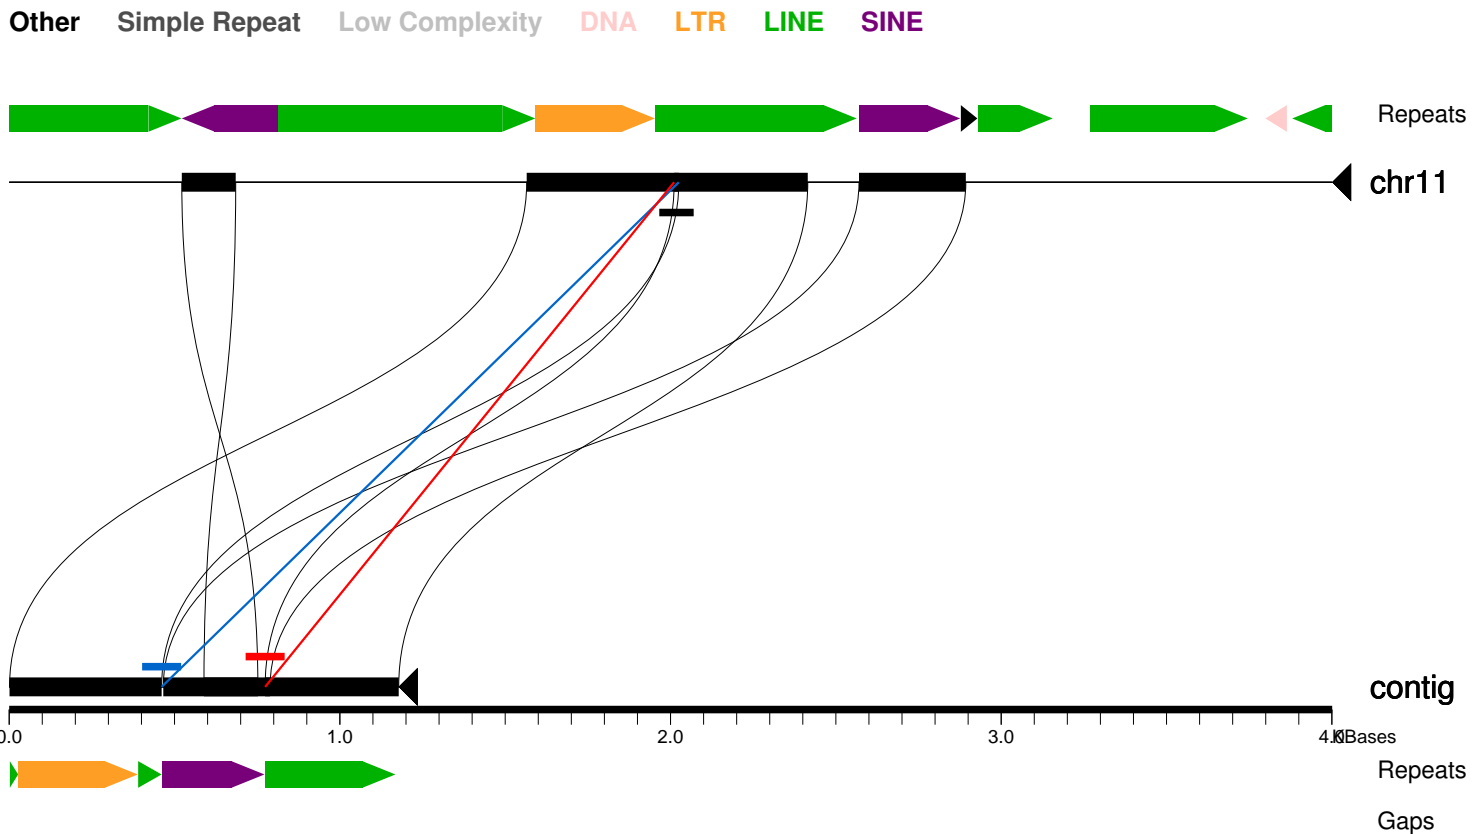





















siteID: chr12\_10234187 Scafftig16 + Breakpoint: chr12:10234188

chr12:10234143-10234244

Overlap Length: 15 INS size: 303 Genotyped: Yes

```
left  AAGT-----TTGGACTCT---AGTACATATATGAGAAGT-TGTATCACCTT----GGGCAAATTA  
chrom AAGT-----TTGGACTCT---AGTACATATATGAGAAGT-TGTATCACCTT----GGGCAAATTA  
right TGATCCGCCCCGCTCGGCCTCCCAAAGTGCTGGGATTACAGGCGTGAGCCACCGCGCCCGGC  
111*1111111111*1**1***1111***1*1111**1*1*1*11**111****111111**1*****
```

```
left  TTTCTTTTTTTTTTTTTTTTTTTTTTTTTTGGAGACGGAGTCTCACTCTGTCGCCCAGGCTGGAGTG-CAG  
chrom TTTCTTTAAGTCTGTCTAAAAATGT-----GAAGTC-----ATG-----AGGAGAAAATGACGG  
right TTTCTTTAAGTCTGTCTAAAAATGT-----GAAGTC-----ATG-----AGGAGAAAATGACGG  
*****222*2*2*2*22222*2*222222*2****222222**222222***2222*2**2*2*
```

Other Simple Repeat Low Complexity DNA LTR LINE SINE

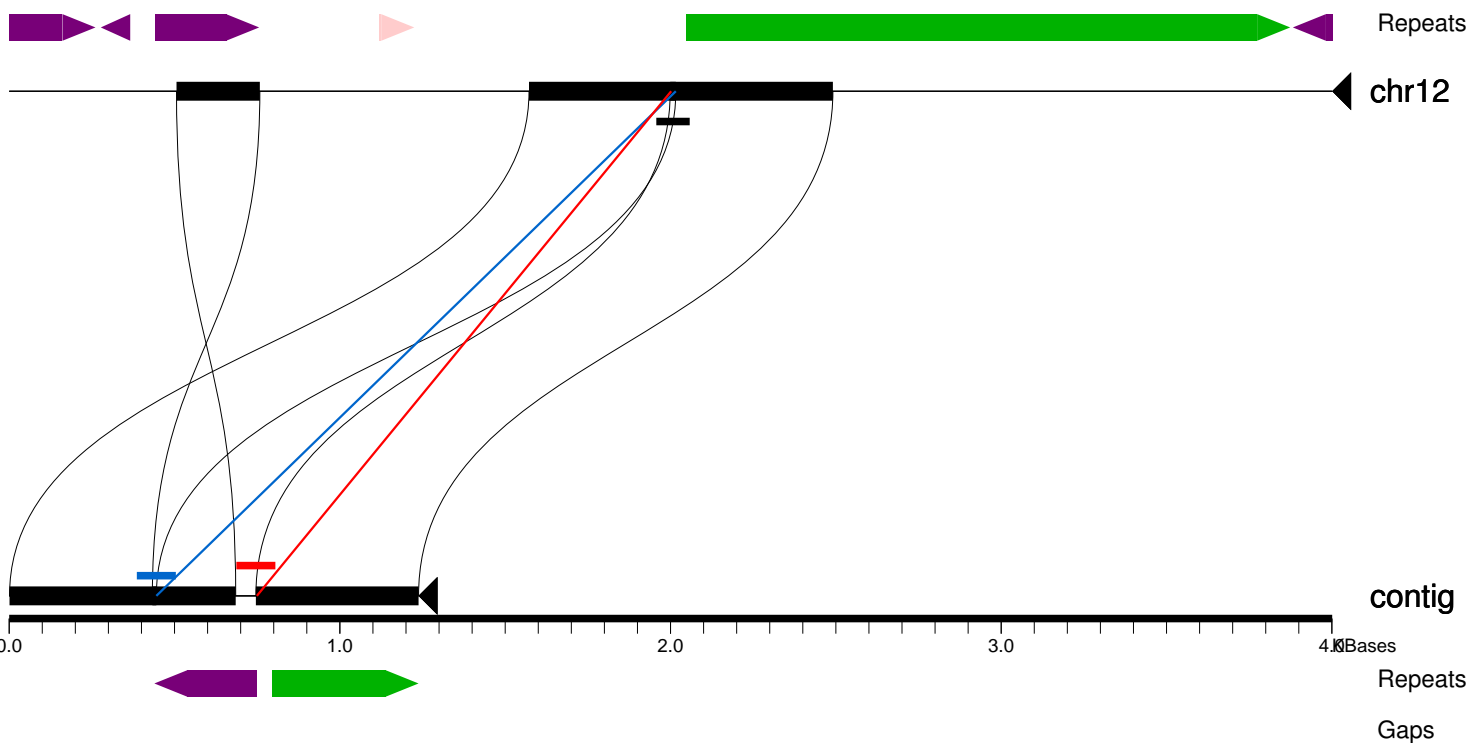



siteID: chr12\_105830906 Scafftig9 - Breakpoint: chr12:105830890

chr12:105830846-105830949

Overlap Length: 16 INS size: 304 Genotyped: Yes

```
left  TGATTT-----AAAAGGAACATGGCTTTTACAGAAAATCAGAGGGCCTTAGAAAAGCTGT
chrom TGATTT-----AAAAGGACCTGGCTTTTACAGAAAATCAGAGGGCCTTAGAAAAGCTGT
right CTCCGTCTCAAAAAAAAAAAAAAAAAAAAAAAAAAAAAAAAAAAAAAAAAAAAAAAAAAAGAAAAGCTGT
11111*1111111111111111111****11*N1N111111111*1*1****11*1*1111111******

left  AAATGATCCC--AGCACTTTGGGAGGCCGAGGCGGGCGGATCACGAGGTCAGGAGATCGAGACCAT
chrom AAATGTTGGATAAGGTCTTTTGGAGTCTAA-----CCCAAAGTCT-----TCTCTATGA-
right AAATGTTGGATAAGGTCTTTTGGAGTCTAA-----CCCAAAGTCT-----TCTCTATGA-
*****2*22222**22****2****2*22*22222222222*2*2*2***222222**222*22*2
```

Other Simple Repeat Low Complexity DNA LTR LINE SINE

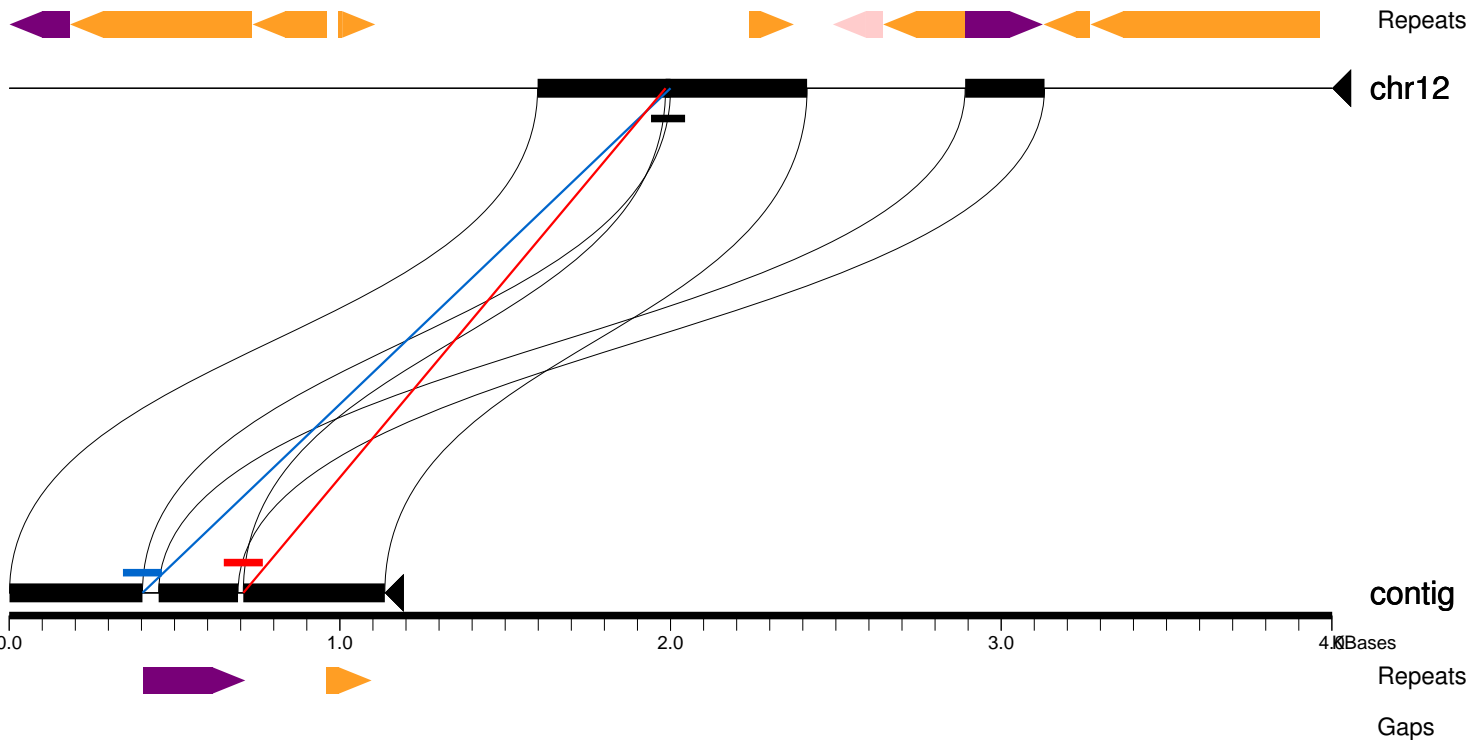

siteID: chr12\_106551989 Scaffoldig2 - Breakpoint: chr12:106552012

chr12:106551962-106552065

Overlap Length: 10 INS size: 312 Genotyped: Yes

```
left  -----GGATGAGTTAAAGTTC-ACA-TCTTATTCAAGTCACCCCTATGCTTAAAACTC
chrom -----GGATGAGTTAAAGTTC-ACA-TCTTATTCAAGTCACCCCTATGCTTAAAACTC
right CTGCAGTCCGCAGTCCGGCCTGGGCGACAGAGCGAGACTCCGTCTCAAAAAAAAAAAAAA----AAAAAAAC
      11111111111111111111111111111111*11**1*11*1**11*1*1*1**1111****111*111111*111111****11*

left  TTCAATGTCGGCCGGGCGCGGTGGCTCACGCCTGTAATCCCAGCACTTTGGGAGGCCGAGGCGGGTGG-
chrom TTCAATGTCCTTCCA-----TTTCTTTGG--TGTTA-----AAGTTCACAGGCCTTGACCACAGGA
right TTCAATGTCCTTCCA-----TTTCTTTGG--TGTTA-----AAGTTCACAGGCCTTGACCACAGGA
      *****22**22222222*22**222*22***2*2222222*22**222*****22*2*2222**2
```

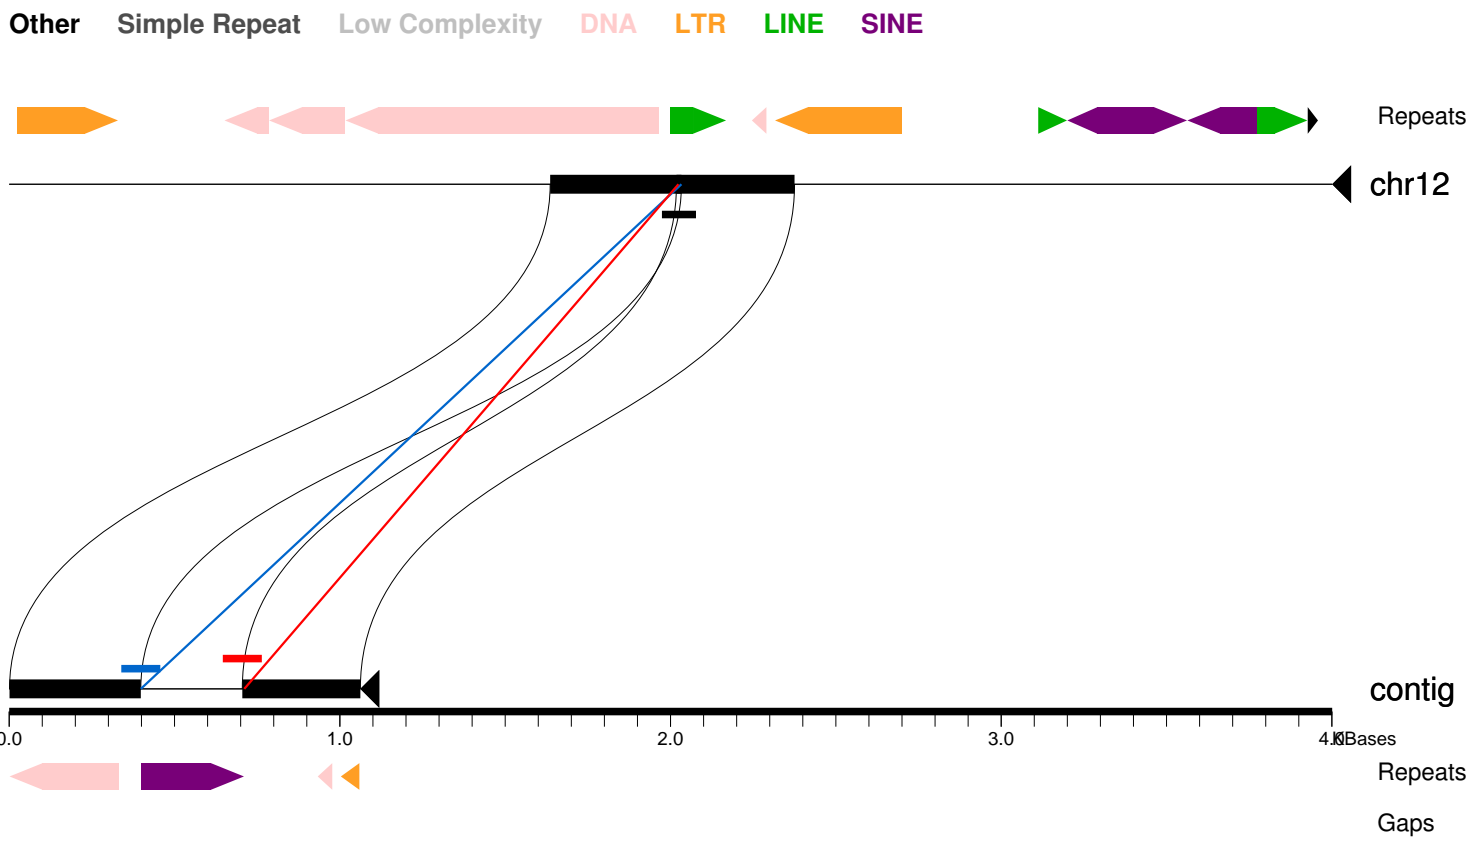

siteID: chr12\_114131023 Scafftig3 - Breakpoint: chr12:114131014

chr12:114130964-114131073

Overlap Length: 10 INS size: 431 Genotyped: No

```
left    ---GTCCCCATTTTACAGACAAGGAAGCTGAGCCTAT----TTCAGG-ACAGGGTC--GTGGATTTCCTT
chrom   ---GTCCCCATTTTACAGACAAGGAAGCTGAGCCTAT----TTCAGG-ACAGGGTC--GTGGATTTCCTT
right  TCCGCCCCGCTCGGCCTCCCAAAGT-GCTGGGATTACAAGCGTGAGCCACCGCGCCCGGCTGGATTTCCTT
       111*1**1*1*1111*111***1*11****1*11**111111*1**11**1*1*11*1******
```

  

```
left    TTTTTTNNNNNNNNNNNNNNNNNNNNNNNNNNNNNNNNNNNNNNNNNNNNNNNNNNNNNNNNNNNNNNNNNN
chrom   -----AACATAGGGGCAGGCAAACCTTTTTTCTGAGGGGACGGATAGTAAATGTTT
right  -----AACATAGAGGCAGGCAAACCTTTTTTCTGAGGGGACGGATAGTAAATGTTT
       2222222222222222N2222222222222222222222222222222222222222222222222
```

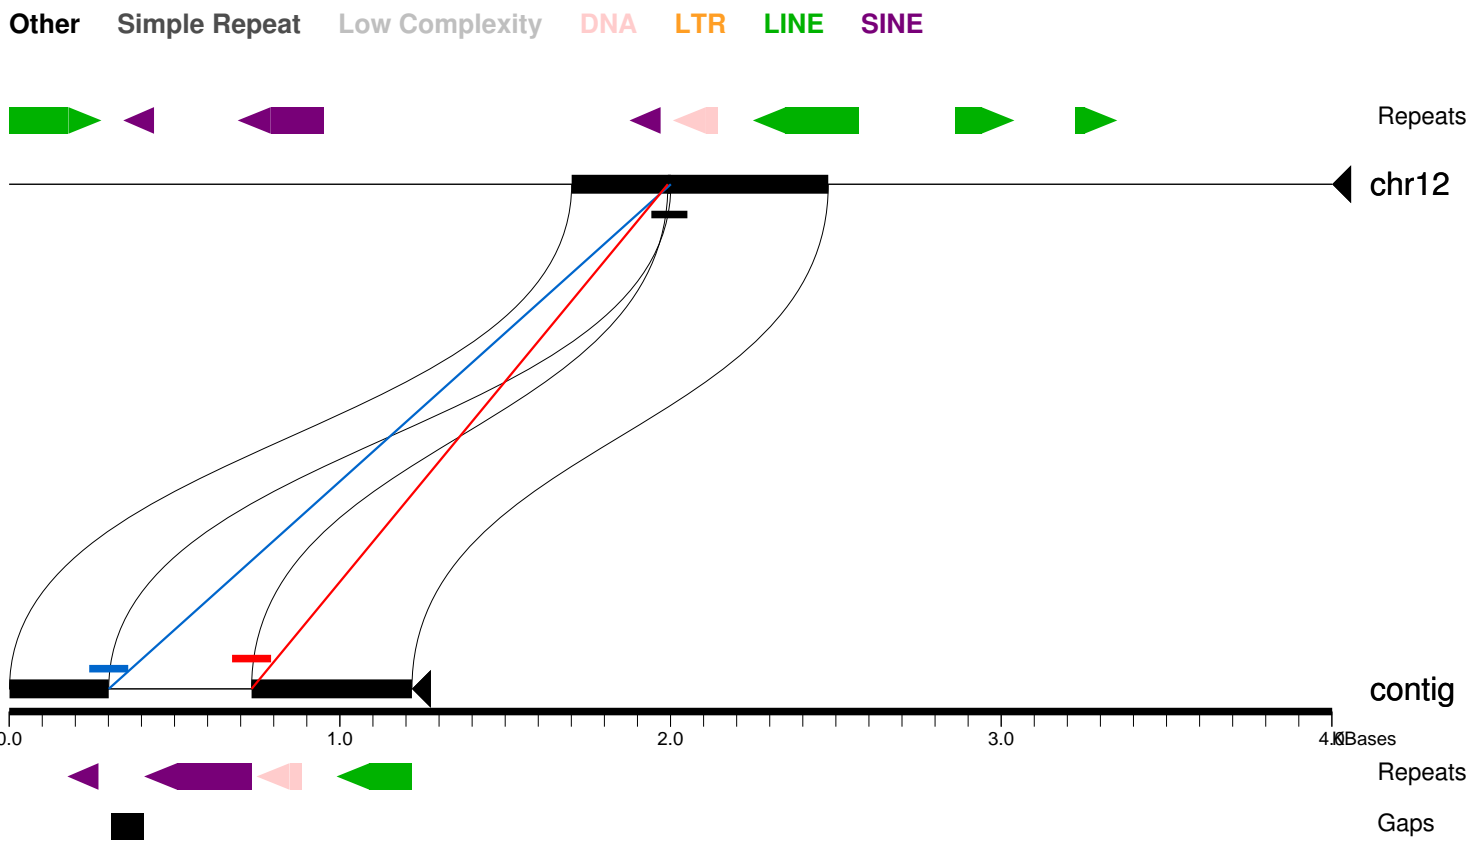

siteID: chr12\_114545407 Scaffitg1 + Breakpoint: chr12:114545416

chr12:114545256-114545589

Overlap Length: 14 INS size: 313 Genotyped: Yes

left G-----TTG-GCTATTTGGGT-CTGCTATTCCTCATTACCACTTAAGGGTTTCCTGTGCC  
chrom GGTGGTCCTTAAAAAGTTG-GCTATTTGGGT-CTGCTATTCCTCATTACCACTTAAGGGTTTCCTGTGCC  
right CGTGAACCCGGGAAGCGGAGCTTGCAGTGAGCCGAGATTGCG-----CCACTGCAG----TCCGCAGTC  
1222NN22NNNN22211\*1\*\*\*1111\*1\*11\*1\*11\*\*\*1\*1111111\*\*\*\*\*11\*\*1111\*\*\*111\*1\*

left CTGCTTATTCTGGAGAGGTAGACACTGGTCATATCTATAGCAGCCACCTGAGCCCCATGGCTGTAGTGTA  
chrom CTGCTTATTCTGGAGAGGTAGACACTGGTCATATCTATAGCAGCCACCTGAGCCCCATGGCTGTAGTGTA  
right CGACCTGGGCGACAGAGCGAGACTCCG----TCTCAAAAAAAAAA-----A  
\*11\*1\*111\*111\*\*\*\*\*11\*\*\*\*\*1\*1\*1111\*1\*\*1\*1\*11\*111\*111111111111111111111111111111111\*

left AAAGACACCTGTACTTGTATACAAAAAAGTTTAGA-----CG-----GTGGCTCAC--GCCTG  
chrom AAAGACACCTGTACTTGTATACAAAAAAGTTTAGAATGTTTCGACTTGAACATGTTACTGACAAGGGAG  
right AAAAAAAAAAAAAAAAAAAAAA AAAAAAAGTTTAGAATGTTTCGACTTGAACATGTTACTGACAAGGGAG  
\*\*\*1\*1\*11111\*11111\*1\*1\*\*\*\*\*1\*222222\*\*2222222222\*\*22\*\*2\*\*22\*222\*

left TAATCCCAGC--ACTTTGGGA-GGCCGAGCGGGTGGATCA----TGAGGTCAGGA---GATCGAGACCA  
chrom TAAAGACTGGTTATTTTCTGATGGCACTGGTTATTAAGCAGACCTGAAAAAAGTAAAGTGATAGCAACCC  
right TAAAGACTGGTTATTTTCTGATGGCACTGGTTATTAAGCAGACCTGAAAAAAGTAAAGTGATAGCAACCC  
\*\*\*222\*2\*222\*2\*\*\*22\*\*2\*\*\*222\*\*2222\*22\*2\*\*2222\*\*\*2222\*\*2\*222\*\*\*2\*22\*\*\*2

left TCCTG-----GCTAACAAGGTGAAACCCCGTCTCTACTAAAAATACAAAA--  
chrom TTCTATTGGCATATTGCTTTCTAGGATGCTACTTGAGT-TTCTTAATTTAGGAAAAAC  
right TTCTATTGGCATATTGCTTTCTAGGATGCTANNNNNNN-----  
\*2\*\*2222222222\*\*22\*2\*\*\*222221NN1NN121N11N11NN11NN111

Other Simple Repeat Low Complexity DNA LTR LINE SINE

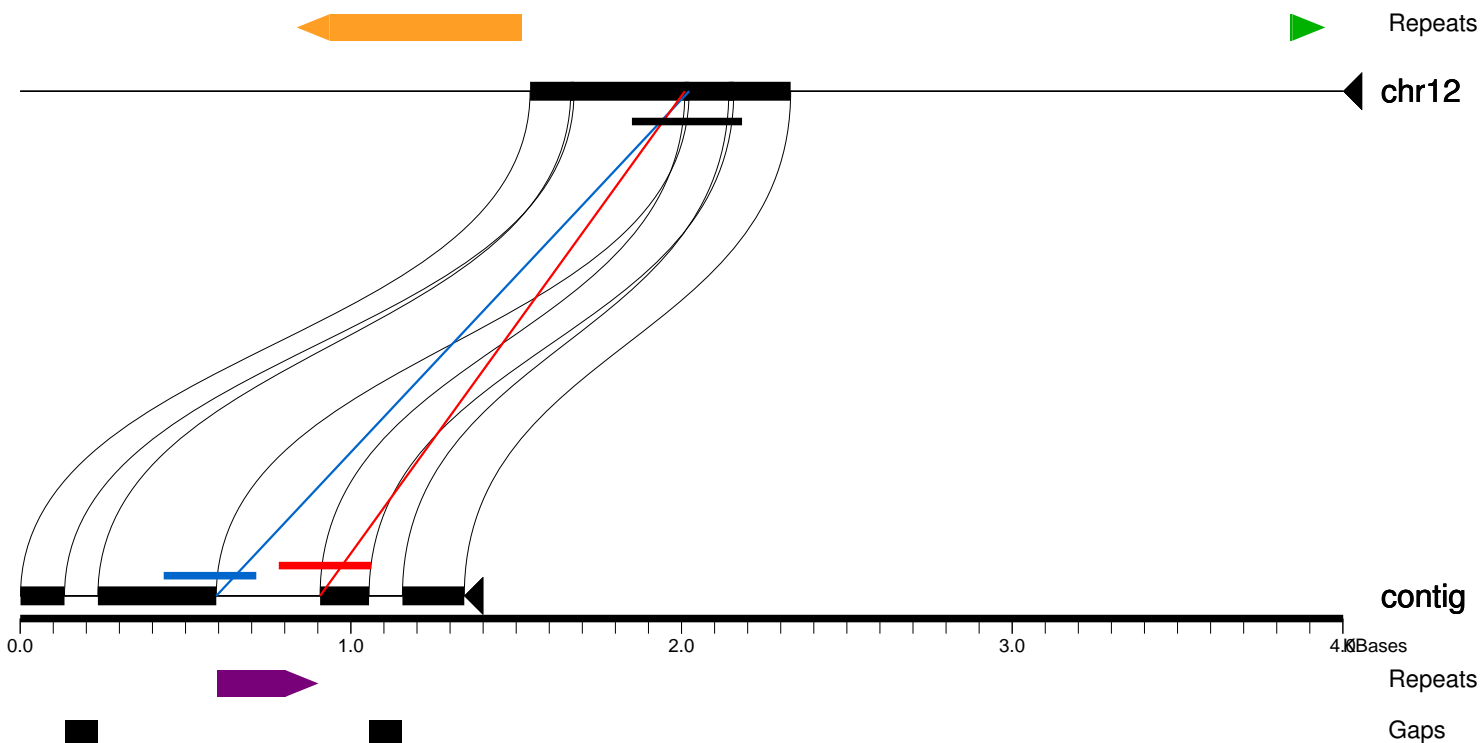

siteID: chr12\_115731107 Scafftig2 + Breakpoint: chr12:115731078

chr12:115731034-115731137

Overlap Length: 16 INS size: 295 Genotyped: Yes

```
left  G-----TTGGCC-----ATTGTAGGTCTTCTTTTGAGAAATGTCTTTTCATGTCCTTTGCCTGT
chrom G-----TTGGCC-----ATTTGTAGGTCTTCTTTTGAGAAATGTCTTTTCATGTCCTTTGCCTGT
right TCCGCCCCGCCTCGGCCCTCCCAAAGTGCTGGGATTACAGGCGTGAGCCACCGCGCCCGGCCTTTGCCTGT
      111111111111*1****1111111*1*11*1**11*1*11111*1**11111*1111*11*1*****
```

```
left  TTCTTTTTTTTTTTTTTTTTGAGACGGAGTCTCGCTCTGTGCGCCAGGCTGGAGTGCAGTGGCG-
chrom TTCTTAATCAGGTTACTCATTTTCTTGAGT-----TCT-----AGGAGTTTCTTATATA
right TTCTTAATCAGGTTACTCATTTTCTTGAGT-----TCT-----AGGAGTTTCTTATATA
      ***22*2222**22*22*222222****22222***2222222222222222*****2222*22222
```

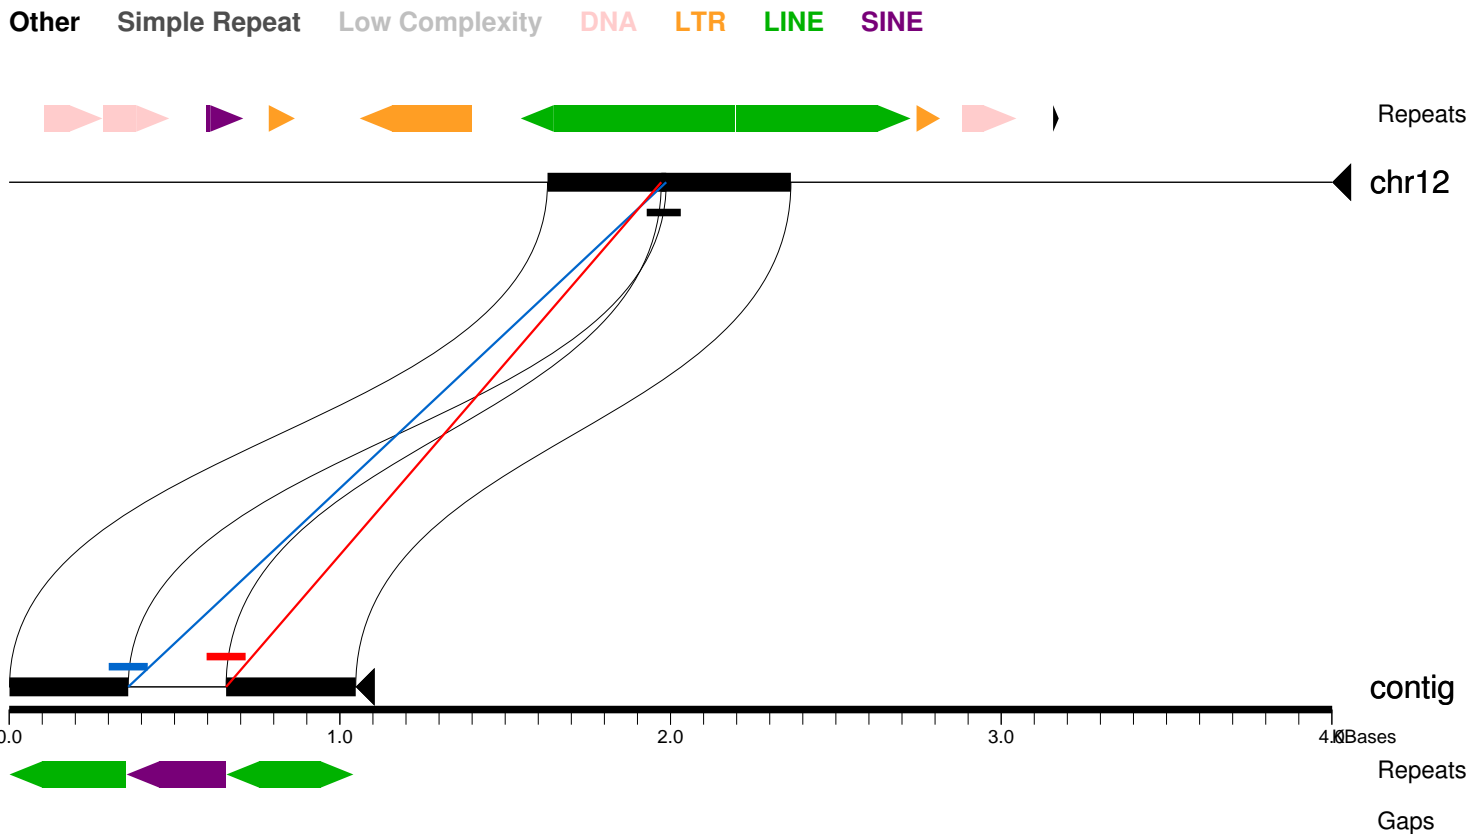

siteID: chr12\_130455059 Scaffitg2 + Breakpoint: chr12:130455046

chr12:130454886-130455215

Overlap Length: 10 INS size: 301 Genotyped: Yes

```
left -----CTGCATCTGCATGGAGTTAACATCCAGAATAAAAAAGGAATTCAAACAACCTCAACCACA
chrom TTTGCAGCCTCTGCATCTGCATGGAGTTAACATCCAGAATAAAAAAGGAATTCAAACAACCTCAACCACA
right CTG--AG-----GCAGGAGA-ATGGCGTGAAC--CCGGGAGGCGGA--GCTTGCAG-----TGAGCCG--
N2N 22 11***111**1***1**1***11**1*1*11111*11*11*1**111111*1*1**111
```

```
left ACAGAAACAAACACTCGAGTTAACAAATGGCCAAAAGACCTGAACAGACATT-TCTCAAAAAGAAGATTTAC
chrom ACAGAAACAAACACTCGAGTTAACAAATGGCCAAAAGACCTGAACAGACATT-TCTCAAAAAGAAGATTTAC
right --AGATCCCGCCACTGCACTCCAGCCTGGGCGACAGAGCG----AGACTCCGTCTCAAAAAAAAA-----
11***11*111***11*1*11*111***1*N*1***1*11111***11111*****1**1*11111
```

```
left AAATGGCCAAAAGTATCTTTAAAAAGGCTCGGCC-----GGGCGGGTGGCTCACGCC---
chrom AAATGGCCAAAAGTATCTTTAAAAAGGCTCAACATCACTAGTCATCAGGGAAAAGGTAAATCAAAAACCAC
right AAA-----AAA-----A***AAGGCTCAACATCACTAGTCATCAGGGAAAAGGTAAATCAAAAACCAC
***11111***N1111111111******22*2222222222222222***222***222***222*222
```

```
left --TGTAATCCAGCACTTTGGGAGGCCGAGGCGGGCGGATCACAAAGGTCAGGAGATCGAGACCATCCCGG
chrom AATGAAATGTCAACTCATCCC-AGTTAGAATAGGTATTATCCAGAAGAAAAAAAAAAAAATA-ACAAATGCTG
right AATGAAATATCAACTCATCCC-AGTTAGAATAGGTATTATCCAGAAGAAAAAAAAAAAA--TA-ACAAATGCTG
22**2***N2**2*2*2*2222**222**222**2222***222*2*22*22*2*2*2*2*2*2*2*2*2*2*
```

```
left CTAAA-ACG--GTGAAAC-----CCCGTCTCTACT-----AAA
chrom CTAAGGACGTGGAGAAAAGTGGAACTCTTCTGCACTGTTGATGGGAATGTAAC
right CTAAGGACGTGGAGAAAAGTGGAACTCTTCTGCACTGTTGATGGGAATGTA---
***22***22*2***222222*2*2***22***2222222222222221NN
```

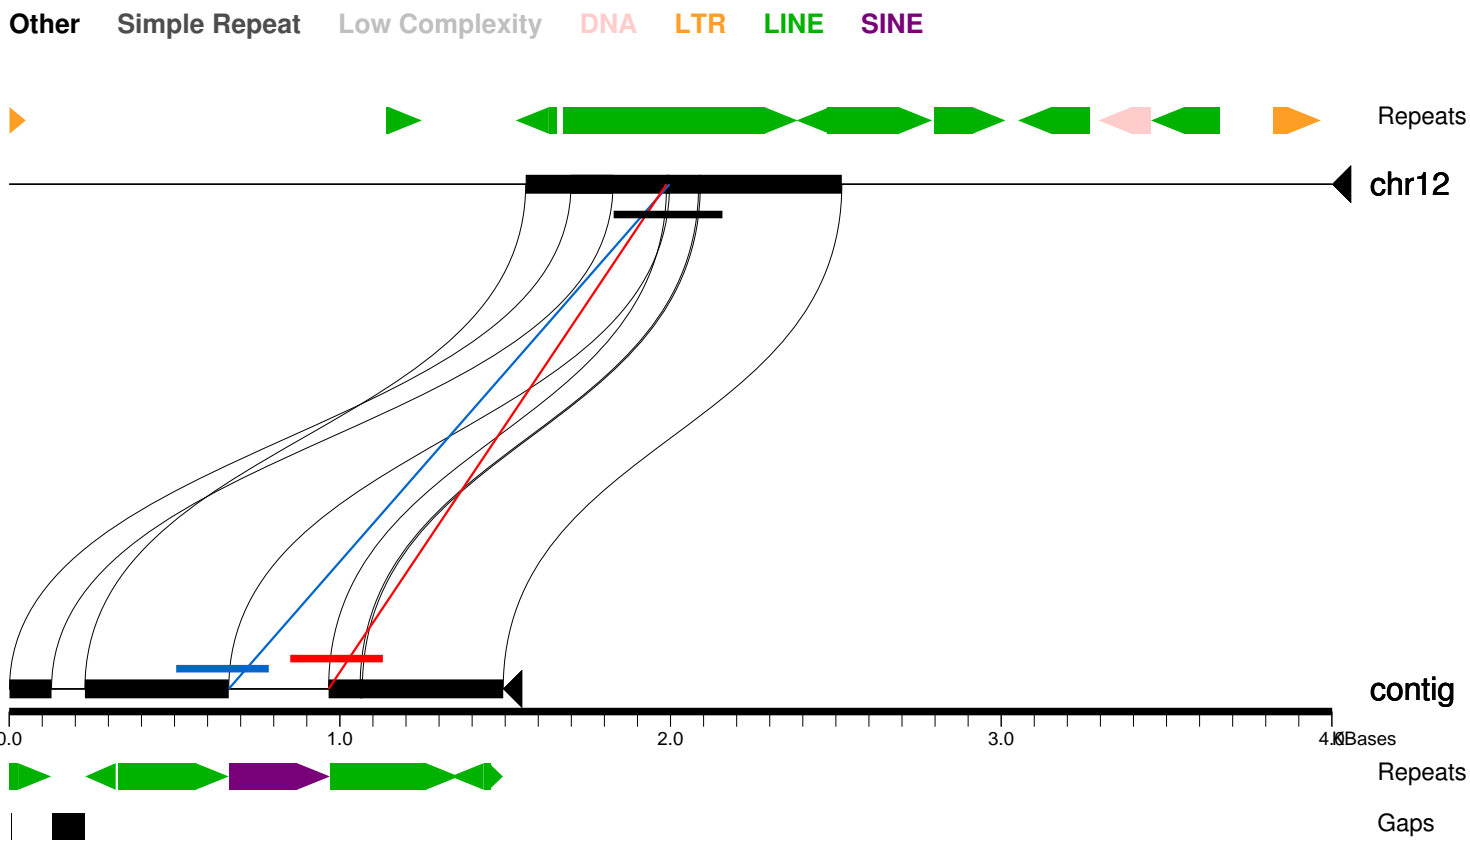



siteID: chr12\_14173887 Scafftig1 + Breakpoint: chr12:14173870

chr12:14173820-14173929

Overlap Length: 10 INS size: 302 Genotyped: Yes

```
left  ATAAGCACTTAACATTAAGTTTGT-CTGTAAGCACTA-CTTTAGCTACCTCT-----CATAAAATTTT
chrom ATAAGCACTTAACATTAAGTTTGT-CTGTAAGCACTA-CTTTAGCTACCTCT-----CATAAAATTTTG
right CCGCCCGCCTCGGCCTCCCAAAGTGCTGGGATTACAGGCGTGAGACACCGCGCCCGGCC-CATAAAATTTTG
      11111*1*1*11111*111111**1***11*11**111*1*1**11***1*11111111******2
```

```
left  TTTTTTTTTTTTTTTTTTTTTTTGAGACGGAGTCTCGCTCTGTCGCCAGGCTGGAGTGCA
chrom ATAGATTAGGTTTTAATCATTATTC--AGTTAAGCA-TATTTTCTA-----ACTTAC
right ATAGATTAGGTTTTAATCATTATTC--AGTTAAGCA-TATTTTCTA-----ACTTAC
      2*222**222***22*22*2*22*22***222**22*2*222*2*222222*2*222
```

Other Simple Repeat Low Complexity DNA LTR LINE SINE

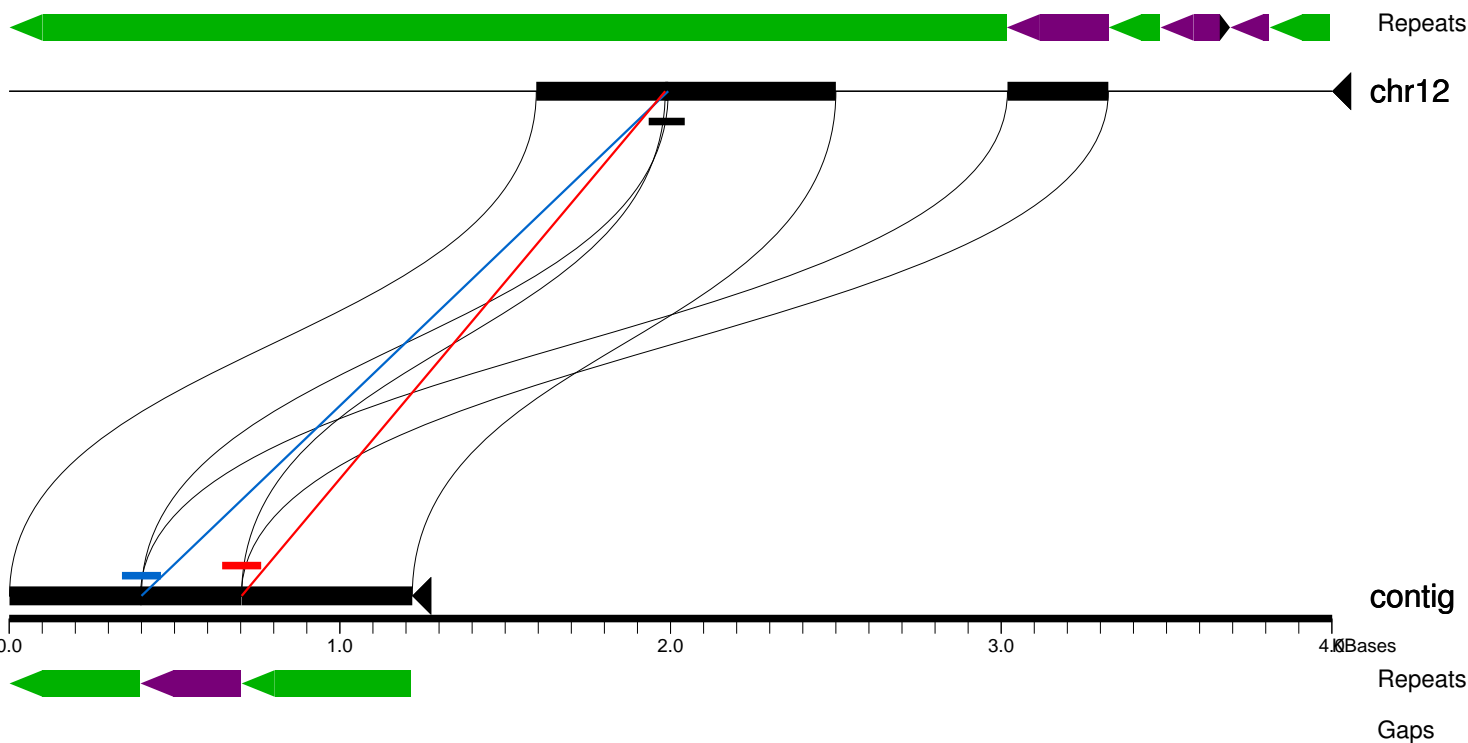



siteID: chr12\_16207017 Scaffitg1 + Breakpoint: chr12:16207040

chr12:16206880-16207210

Overlap Length: 11 INS size: 182 Genotyped: Yes

```

left  AAG-----AGTTTCTGCACAGCAAAAGAACTATCAACAGAGTAAACAGACAA---CCTACAGAA
chrom AAGCTAATTAAGAGTTTCTGCACAGCAAAAGAACTATCAACAGAGTAAACAGACAA---CCTACAGAA
right AG----AATGGCGTGAACCCGGAGGCGGAGCTTGCAGTGAGCCGAG-ATCCCGCCACTGCACTCCAGCC
      *11  2N2NNN21*111*1*1111**11*11111*11*1*1*1***1*11*1*1**11111**1***11

```

```

left  TCAGAGAAA-ATCTTCACAAACTATGCATCTGACAAAAGGTCTAATATCCAGCAGCTACAAGAAACTTAAA
chrom TCAGAGAAA-ATCTTCACAAACTATGCATCTGACAAAAGGTCTAATATCCAGCAGCTACAAGAAACTTAAA
right TGGGCGACAGAGCGAGAC-----TCCGTCTCAAAAAAAAAAAAAAAAAAAAAAAAAAAAAAAAAAAAA
      *11*1**1*1*1*111**1111111*1*1***1*1***111111*1*111*11*111*1**1***111**

```

```

left  TTTACAAGAAAAAAAAACCCCTATTAAAAAGTGGGCTG----TAGTCCAGCTACTTGGGAGGCTGAGGCA
chrom TTTACAAGAAAAAAAAACCCCTATTAAAAAGTGGGCTG----TAGTCCAGCTACTTGGGAGGCTGAGGCA
right AAAAAAAAAAAAAAAAAA---AAAAGTGGGCTGCAAGGATATGAACGGAGAGTTTCAAAAAGAGACA
      111*1**1*****1111*11*****222222**2222*2*22*2**222*22222**2**

```

```

left  GGAGATGGCGTGAACCCG-----GGAGGCGGAGCTTGC-----AGTGAGCCG-AGATC----C
chrom TACATGTGGCCAACAAAACATACAAAAGAAAGCTCAACATCTCTGATCATTAGAGAAAACGCAAATCAAAAC
right TACATGTGGCCAACAAAACATACAAAAGAAAGCTCAACATCTCTGATCATTAGAGAAAACGCAAATCAAAAC
      222222***2222*22*22222222*2*2**22*2*2*2222222222**2**22**2*2***2222*

```

```

left  CGC-----CACTGCACTCCAGCTGGGCGAC----AGAGCGAGACTCCG-
chrom CACAATAAGATACCACCTCACACCAGTCAGAATGACTATTATATTAATAAAAAAAAAAAAA
right CACAATAAGATACCAC-----
      *2*222222222**NN111N1111N1N1NNN111  1N1NNN1N1NNNNN

```

Other Simple Repeat Low Complexity DNA LTR LINE SINE

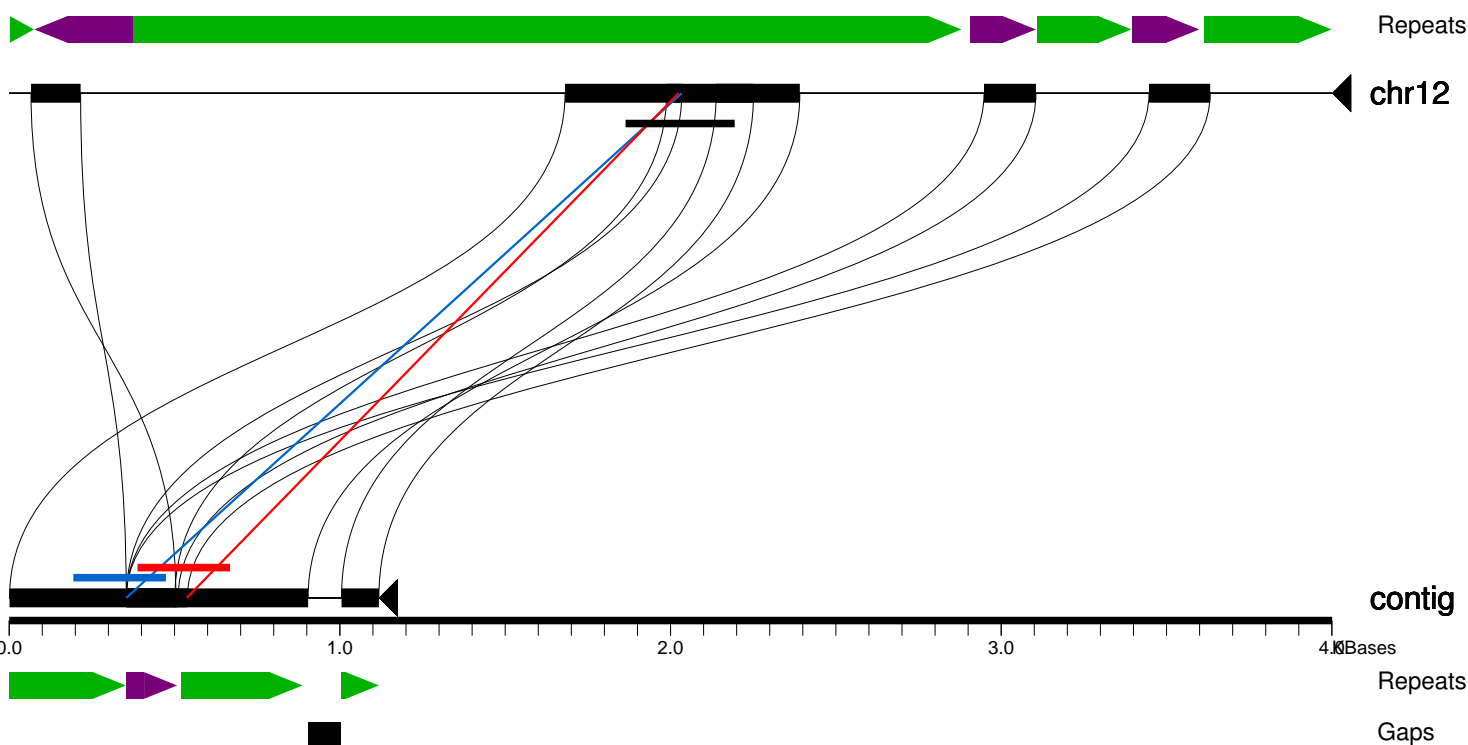

siteID: chr12\_16450862 Scafftig1 + Breakpoint: chr12:16450839

chr12:16450679-16451009

Overlap Length: 11 INS size: 309 Genotyped: Yes

```
left  --GCATTAGGTCGTGGTCTGTTTGTCCAGTCATATTTCTACATGACTGTTTCATACTTGGTTGAATCTAAG
chrom TTGCATTAGGTCGTGGTCTGTTTGTCCAGTCATATTTCTACATGACTGTTTCATACTTGGTTGAATCTAAG
right TTTAGTAGAGACGGGGT----TTCACC-----TTGTTAGCCAGGA-TGGTCTCGATCTCCTGAC-CTCAT
      22111*111*1**1***1111**11**11111*11**111**1**1**1**1111*1111***11**1*1
```

```
left  CATAAAACTGGACAATTTCCCTTTGTATCTTTGGGTCTTCATTCTGAAGGTTCCCTGTGTCACATACAACCTG
chrom CATAAAACTGGACAATTTCCCTTTGTATCTTTGGGTCTTCATTCTGAAGGTTCCCTGTGTCACATACAACCTG
right GATCCACCCG-----CCTC-----GGCCTCCC-----AAAGTGCTGGGATTACAGGC----G
      1**11*1*1*111111111***111111111111**1**1*111111**1**1*11*11*1***11*1111*
```

```
left  TGATCAAATAAATGTGTATGCCTTTTCTCCTTTTTTTTTTTTTTTTTTTT-----TTTTGAG-----
chrom TGATCAAATAAATGTGTATGCCTTTTCTCCTTTTAATCTGCCTTTTGTGTCAGCTGATCTTCAGCAACCCCTT
right TGAGCCACCCGCGCCCGGC--CCTTTTCTCCTTTAATCTGCCTTTTGTGTCAGCTGATCTTCAGCAACCCCTT
      ***1*1*111111111*1111******2**22*2*222***2*222222*2**2**2222222
```

```
left  -----ACGGAGTCTCGCTCTGTGCGCCAGGCC--AGACTGC--GACTGC-----AGTGGCGCAAT
chrom CAAAGGGCAAAGGGGAAGTGTTCCTTTGTCCCTTCCCTTACACTACCCGTAAGTGTTCCTTATTCAGGCCAT
right CAAAGGGCAAAGGGGAAGTGTTCCTTTGTCCCTTCCCTTACACTACCCGTAAGTGTTCCTTATTCAGGCCAT
      22222222*2**2*2222*2**22*2*2**22**22*2***2*22*2***222222*2*222**2**
```

```
left  C-----TCG-GCTC--ACTGCAAGCTCCGCTTCCCGG-GTTCAC-----
chrom CATTATTTCTTGCTATAAATTATAAATAAGAGATTCTCTACTGATCACCTTGC
right CATTATTTCTTGCTATAAATTATAAATAAGAGATTCTCTACTG-----
      *22222*22***22*2*22**2222*2***2*2222*N1111
```

Other Simple Repeat Low Complexity DNA LTR LINE SINE

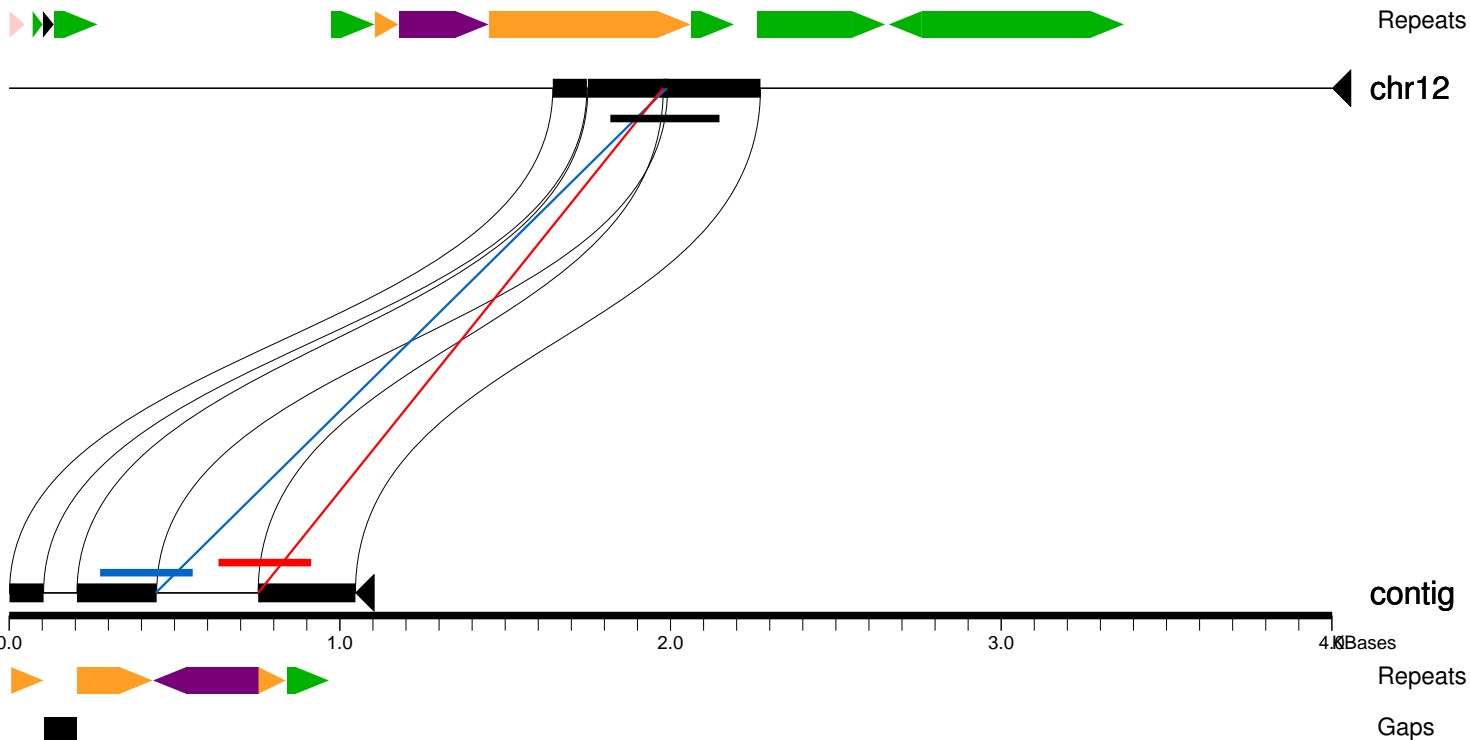

siteID: chr12\_19806209 Scaffitig7 - Breakpoint: chr12:19806210

chr12:19806163-19806267

Overlap Length: 13 INS size: 277 Genotyped: Yes

```
left      TTTTTTCCACAG-----TCAGAAACGTGACTGAAACATTTCTTCCTCTTAA-GAGGCATT
chrom     TTTTTTCCACAG-----TCAGAAACGTGACTGAAACATTTCTTCCTCTTAA-GAGGCATT
right     CCTGGG-CGACAGAGCGAGACTCCGTCTCAAAAAAAAAAAAAAAAAAAAAAAAAAAAAAGAGGCATT
          11*1111*1****1111111111111111***1***1111*111***1*111111111111***1*****

left      AAGAGTTGGGAGGCCGAGGCGGGCGGATCACGAGGTCAAGAGATCGAGACCATCCCGGCTAAAA
chrom     AAGAG-----AAAAGGATAGATTTCTGTTTC---TTTTCGAATTTTCTCTTTAAGA
right     AAGAG-----AAAAGGATAGATTTCTGTTTC---TTTTCGAATTTTCTCTTTAAGA
          *****2222222222*222**222***22*22*2*222222*2*22*222***2222***2*
```

Other Simple Repeat Low Complexity DNA LTR LINE SINE

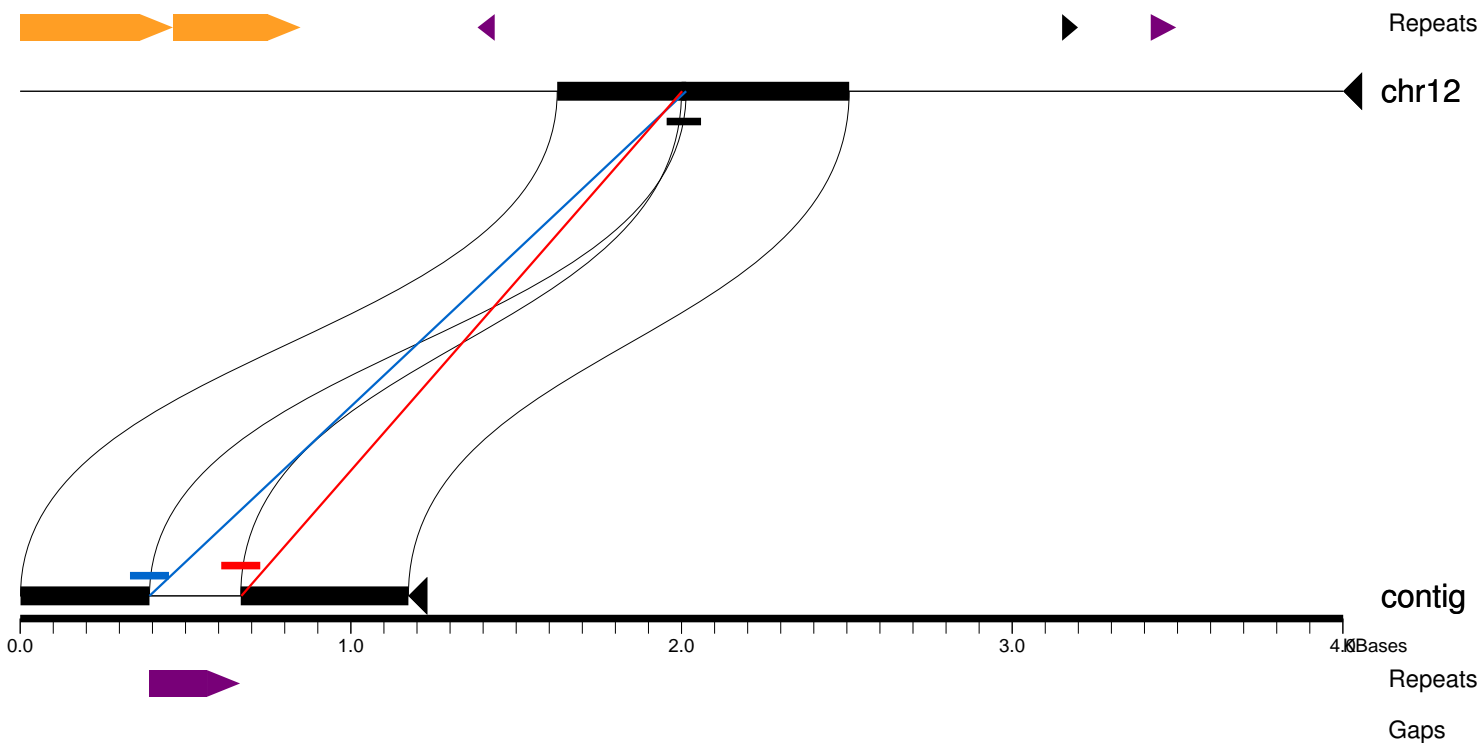



siteID: chr12\_20473893 Scafftig7 - Breakpoint: chr12:20473879

chr12:20473719-20474053

Overlap Length: 15 INS size: 310 Genotyped: Yes

```
left -----CTTGCTCTTGCTAAGAGAGACATCAGGTGT-CAGTGATTCCATCTCCTCGTCAGG
chrom GTCCCTCTGATATTCTTGTCTTGTCTAAGAGAGACATCCGGTGT-CAGTGATTCCATCTCCTCGTCAGG
right A-----GA-ATGGCGTGAACCCGGGAGGCGGAGCTTGCAGTGAGCCGAGATTGCG---CCACTGCACT
N      22 22NN*1**11*11*11*1*1*111*1*121***11*1*1****1*1111*1*11**11
```

```
left TCAG--TTTTCTGTGATCAAGAATAAGAAAAGAAAAGAAAAAGACCTTTTATTCACTTGCTAACTGAAGC
chrom TCAG--TTTTCTGTGATCAAGAATAAGAAAAGAAAAGAAAAAGACCTTTTATTCACTTGCTAACTGAAGC
right CCAGCCTGGGCGACAGAGCGAGACTCCGTCTCAAAAAAAAAAAAAA-----AAAAAA--
1***11*111*1111**1*1***1*11*1111***1*****1*11111111111111111111**111**11
```

```
left TGTATCTGTTTTAACTAGCATTAAAAATGTTCCATTCT--GGC-----CGGG-----CGCGGTGGCT-
chrom TGTATCTGTTTTAACTAGCATTAAAATGTTCCATTCTTTGTCTAACTTACATGAATTACTCTTAGGCTT
right -----AAAAAAAAAAAAAATGTTCCATTCTTTGTCTAACTTACATGAATTACTCTTAGGCTT
1111111111111111**11*11*11*11*****22*2*2222222*22*22222*2*222****2
```

```
left -----CACGCCGTGTA-TCCCAGCACTTTGGGAGGCCGAGGCG----GGCGGAT--CACGAGGTCAGGA
chrom TCCTTTCACTCTTTTAAATAACAGTTTTTTTCTAGCCATAGTGGATATGCCTGTTTTCAAAAATATAACTG
right TCCTTTCACTCTTTTAAATAACAGTTTTTTTCTAGCCATAGTGGATATGCCTGTTTTCAAAAATATAACTG
222222***2*2*2***2*22***222***222**2*22**22*2222*2*2*2*22**22*2*222
```

```
left GATCGAGACCATCCCGGCTAAAACG---GTGAA--ACCCGTCTCTACT-----AAA
chrom CAAAGAG-CTATTGCTGCTTCAGTGATTGTGGATTACAAGCTATTTAGGTTGTCACAGC
right CAAAGAG-CTATTGCTGCTTCAGTGATTGTGGATTACAAGCTATT-----
2*22***2*2**22*2***22*22*222***2*22**2222*2*211NN      1NN
```

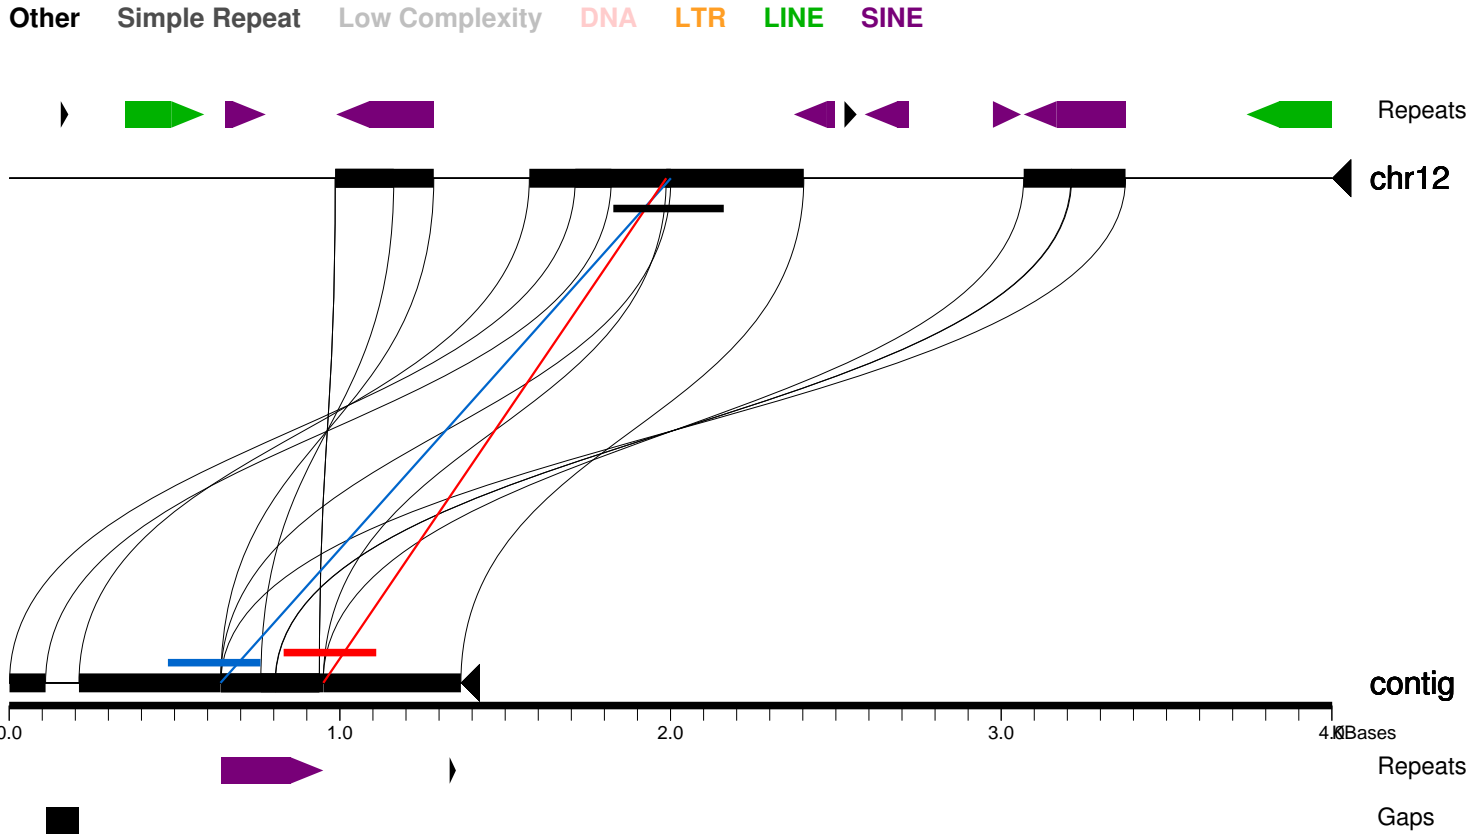

siteID: chr12\_2089862 Scaffitig1 + Breakpoint: chr12:2089842

chr12:2089797-2089901

Overlap Length: 15 INS size: 490 Genotyped: No

```
left   AAAT-----GCTTATAAGTGTCATTTTAAATCCAGTGTTTGGTAATACTA-----CCTTTAACTAT
chrom  AAAT-----GCTTATAAGTGTCATTTTAAATCCAGTGTTTGGTAATACTA-----CCTTTAACTAT
right  CCGCCCGCCTCGGCCTCCCAAAGTGCTGGGATTACAGGCGTGAGCCACCGCGCCCGGCCCTTTAACTAT
      1111111111111111**1*111*11**11*111*111*11*1**11*11*111*1111111111*****

left   TTTTNTTTNNNNNNNNNNNNNNNNNNNNNNNNNNNNNNNNNNNNNNNNNNNNNNNNNNNNNNNNNNNNNN
chrom  TTTTAAAT-----AAAGAGTTATTTATTTTCGTTGCTTCTATAAAAAATGAAAAAAA
right  TTTTAAAT-----AAAGAGTTATTTATTTTCGTTGCTTCTATAAAAAATGAAAAAAA
      ***22*222222222222222222222222222222222222222222222222222222222222222222
```

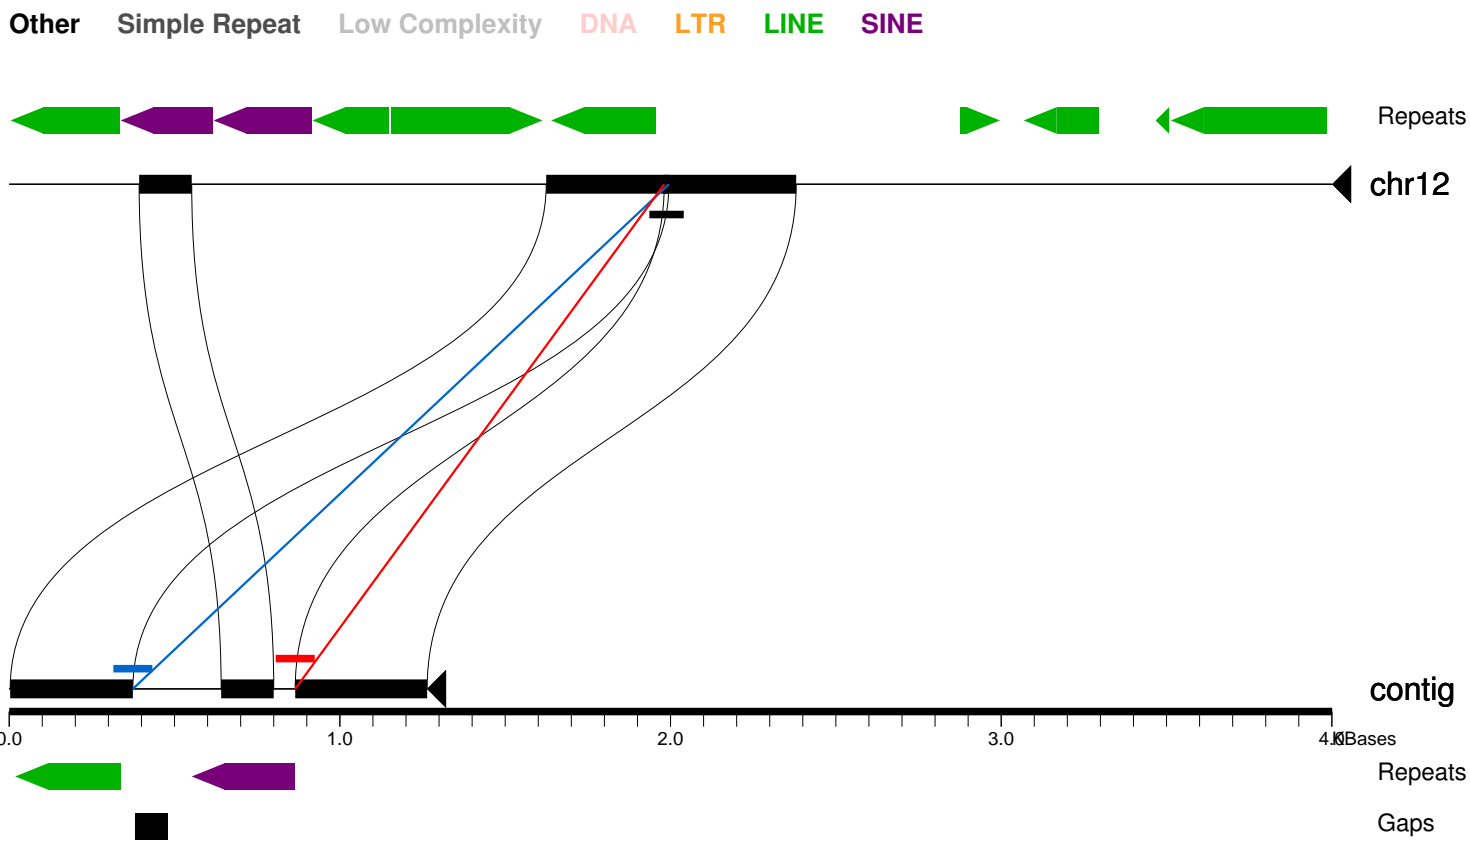



siteID: chr12\_20908668 Scaffitig10 + Breakpoint: chr12:20908671

chr12:20908626-20908730

Overlap Length: 15 INS size: 304 Genotyped: Yes

```
left      T-----TTGACAGAGGTAAG--CAGACTTTTTATGCCTCAGAAA----GCACAATTAGTTCTTTATT
chrom     T-----TTGACAGAGGTAAG--CAGACTTTTTATGCCTCAGAAA----GCACAATTAGTTCTTTATT
right    CCACCCGCCTCGGCCTCCCAAAGTGCTGGGATTACAGGCGTGAGCCACCGCGCCCGGCCAGTTCTTTATT
          1111111111*1*1*1111111***11*1*111**11*1**1*1**11*1111**1*1111*****
```

```
left      TTTTTTTTTTTTTTTTTTTTTTGAGACGGAGTCTCGCTCTGTTCGCCAGGCCGGACTGCGGACTGC
chrom     TTTTAAAT-----TAAACCAAACCTCTTTTCAGAAGTCAAGGA---AATTCCTCAGT
right    TTTTAAAT-----TAAACCAAACCTCTTTTCAGAAGTCAAGGA---AATTCCTCAGT
          ***22*222222222222*2*22*22*2**2222**2*22*2*2**2222*2*2*222*2*2
```

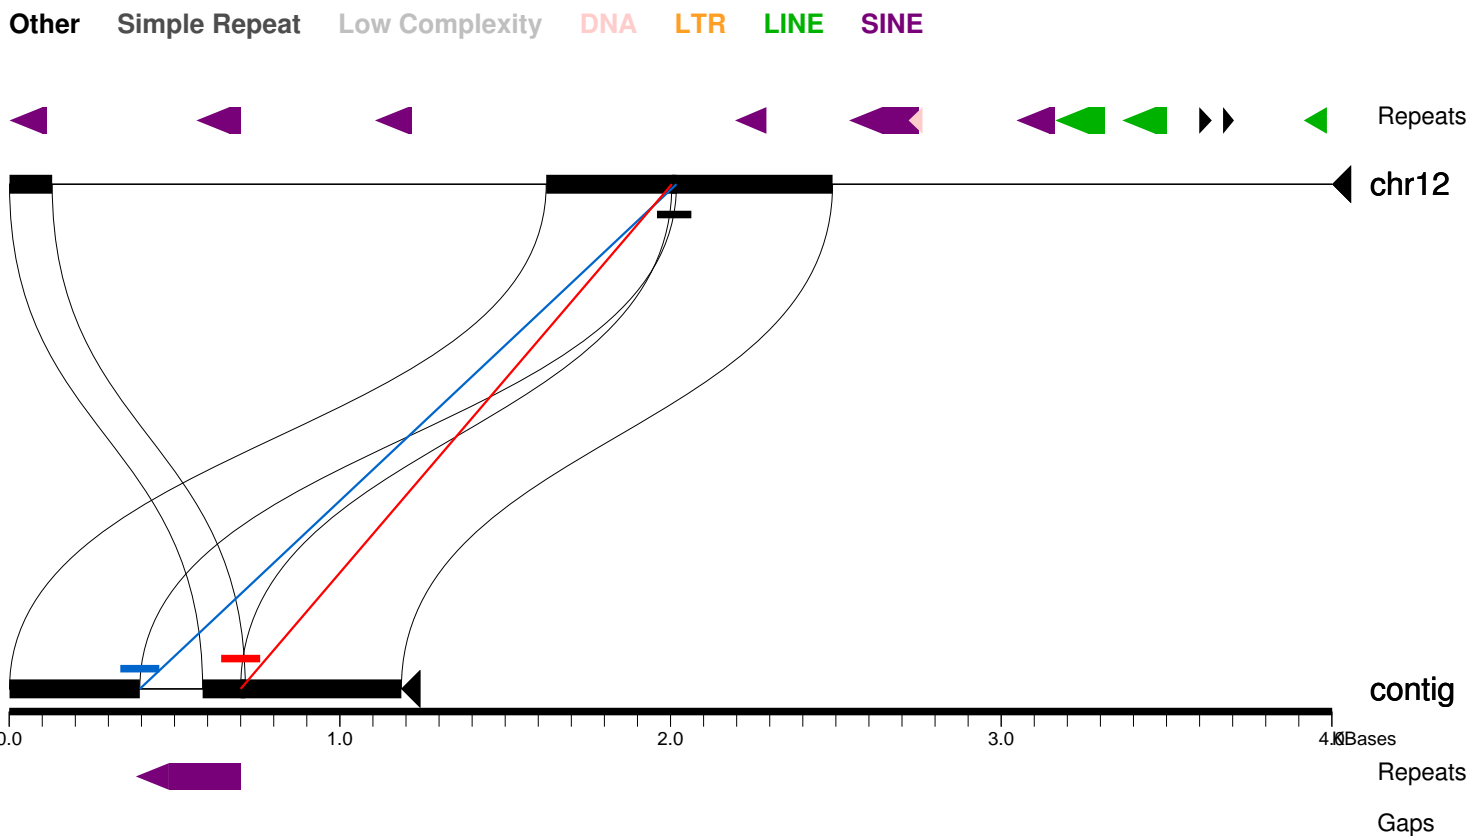

siteID: chr12\_22085959 Scafftig2 - Breakpoint: chr12:22085944

chr12:22085896-22086003

Overlap Length: 12 INS size: 321 Genotyped: Yes

```
left  GCAAAGA-----CATGGAATCAACCTAAATGTCCATCAATGATAG-CTGGATAAAGAAAAATGTG
chrom GCAAAGA-----CATGGAATCAACCTAAATGTCCATCAATGATAG-CTGGATAAAGAAAAATGTG
right AGAGCGAGACTCCGTCTCAAAAAAAAAAAAAAAAAAAAAAAAAAAAAACAAAAAAAAACAAACAAACAAAGAAAAATGTG
      11*11**111111111111**111**11**111***111*1*1***11*1*11*1111*11*****
```

```
left  GGCCGGGCGCGGTGGCTCGCGCCTGTAATCCCA-GCACTTTGGGAGGCCGAGGCCGGGCGGA-
chrom GTACATATACACTA-----TGAATACTATGCA----GCCAGAAAAAAAAACAAGATAAT
right GTACATATACACTA-----TGAATACTATGCA----GCCAGAAAAAAAAACAAGATAAT
      *22*22222*22*2222222222**2***2*2*2***2222*22**2222*22*22*222*2
```

Other Simple Repeat Low Complexity DNA LTR LINE SINE

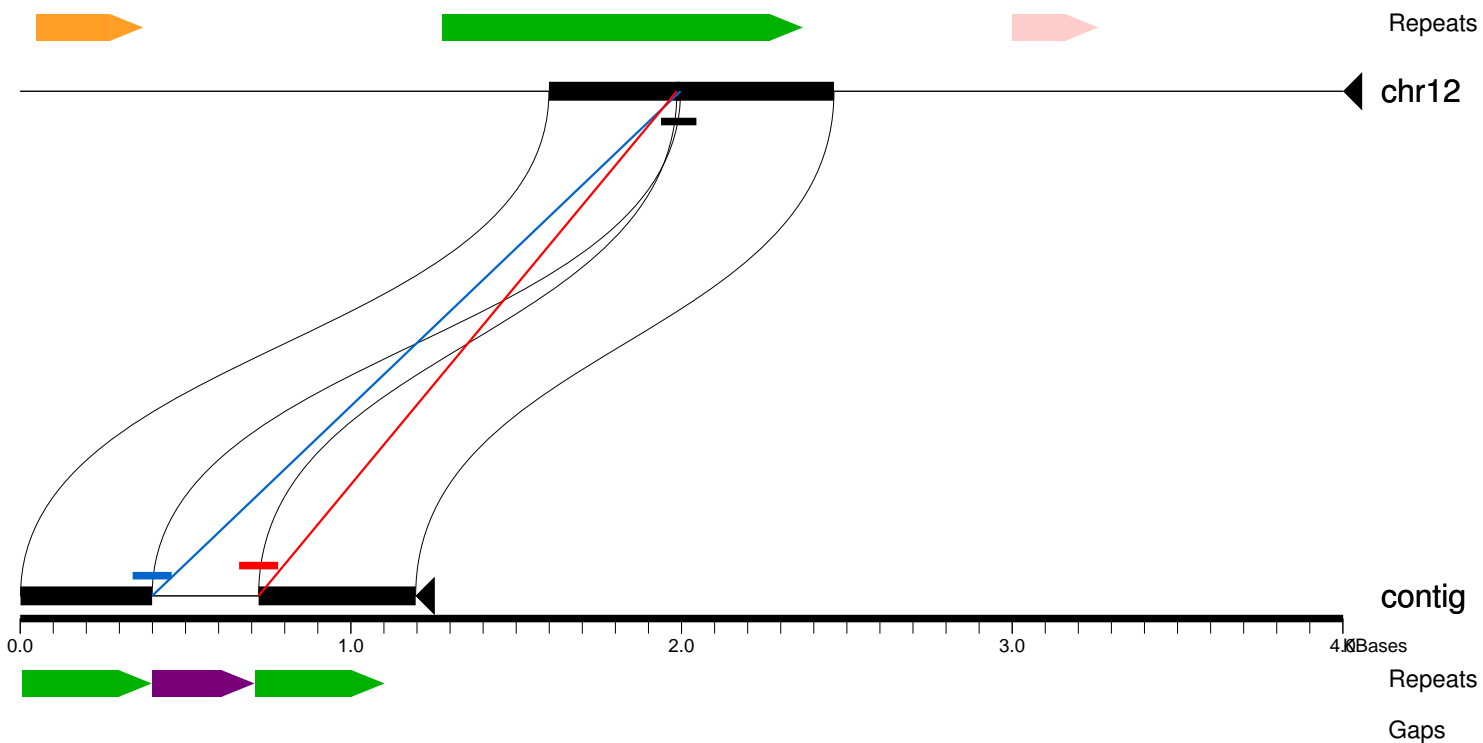

siteID: chr12\_22123792 Scafftig11 + Breakpoint: chr12:22123783

chr12:22123737-22123842

Overlap Length: 14 INS size: 308 Genotyped: Yes

```
left CCTT---GCTTGGAGTT----AGT-CTTGAATT-----CATCACTCACTGTCTCTCTGTTCCTTCCATT
chrom CCTT---GCTTGGAGTT----AGT-CTTGAATT-----CATCACTCACTGTCTCTCTGTTCCTTCCATT
right CCGCCCGCCTCGGCCTCCCAAAGTGTCTGGGATTACAGGCGTGAGCCACCGCGCCCGGCC*TCCTTCCATT
**111111**1**11*11111***1**1*1***11111*1*1*11***1*111*11111*****
```

```
left CT*TTTTTTTTTTTTTTTTTTTTTTTTTTTTTTGAGACGGAGTCTCGCTCTGTTCGCCAGGCTGG
chrom CT*ATACAAATATTCAATCATTTAC-----GATAC--ACTCA-GCAATGA----CTGGCCT-
right CTTATACAAATATTCAATCATTTAC-----GATAC--ACTCA-GCAATGA----CTGGCCT-
**2*22222*2**222*22***2222222**2**22*2**22**22**22222*2***222
```

Other Simple Repeat Low Complexity DNA LTR LINE SINE

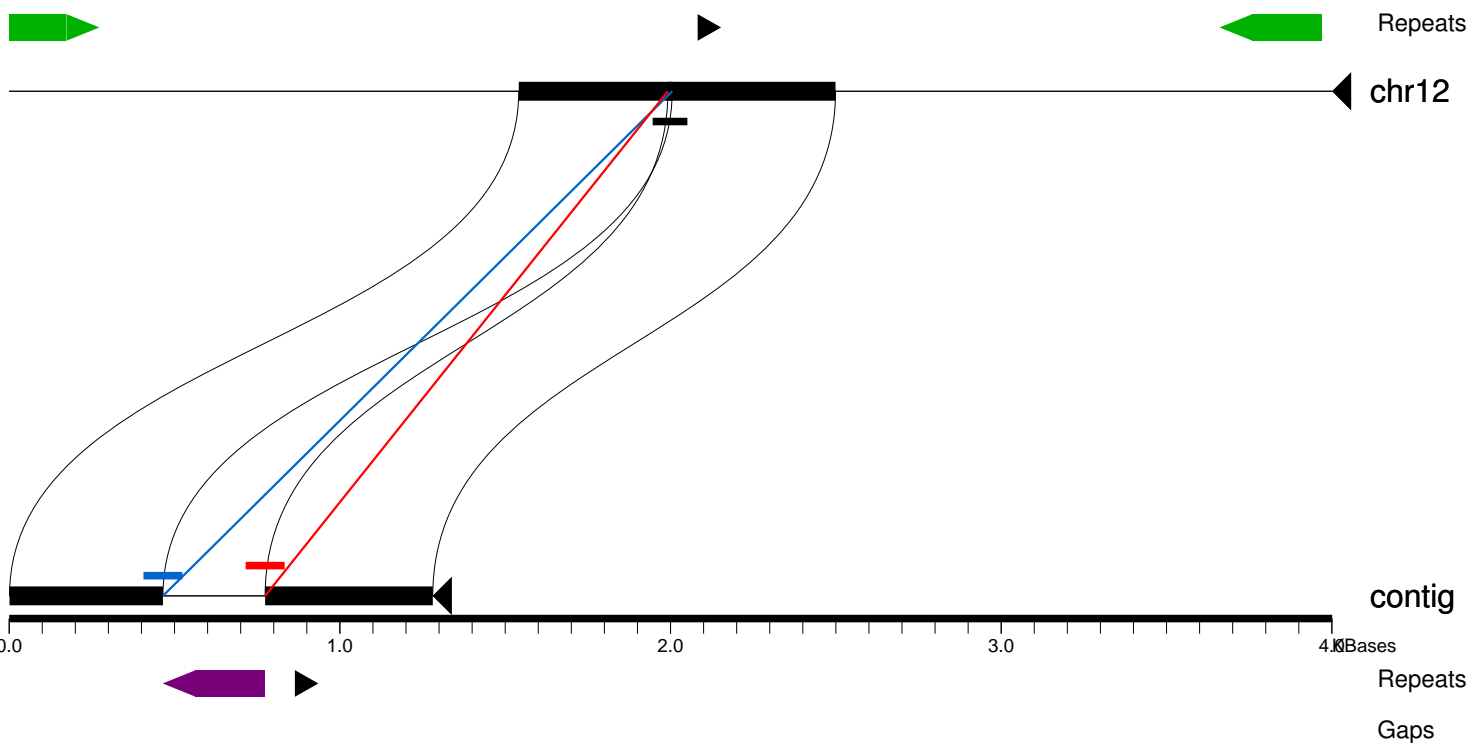



siteID: chr12\_24518632 Scafftig1 + Breakpoint: chr12:24518612

chr12:24518568-24518671

Overlap Length: 16 INS size: 311 Genotyped: Yes

```
left  A-----TAATTATTGAAAAATGATTTTCTTTACAAA--TTAATAAATA-----GACTTGATTAATACT
chrom A-----TAATTATTGAAAAATGATTTTCTTTACAAA--TTAATAAATA-----GACTTGATTAATACT
right CCGCCCGCCTCGGCCTCCCAAAGTGCTGGGATTACAGGCGTGAGCCACCGCGCCCGCCGCTGATTAATACT
      1111111111*111111*111***1111*1111*****1111*1*111*111111111*1*1*****
```

```
left  TTTT TTTTTTTTTTTTTTTTTTTTTTTTTTTTTTTTTTTT GAGACGGAGTCTCGCTCTGTCGCCAGGC
chrom TTTT TAACTGAAGTTGAAGAGATCTGGGATACATATAGACACAGGCTT-----C
right TTTT TAACTGAAGTTGAAGAGATCTGGGATACATATAGACACAGGCTT-----C
      *** *222*2222**2222222*2*2222*222*22***22**2**222222222222222*
```

Other Simple Repeat Low Complexity DNA LTR LINE SINE

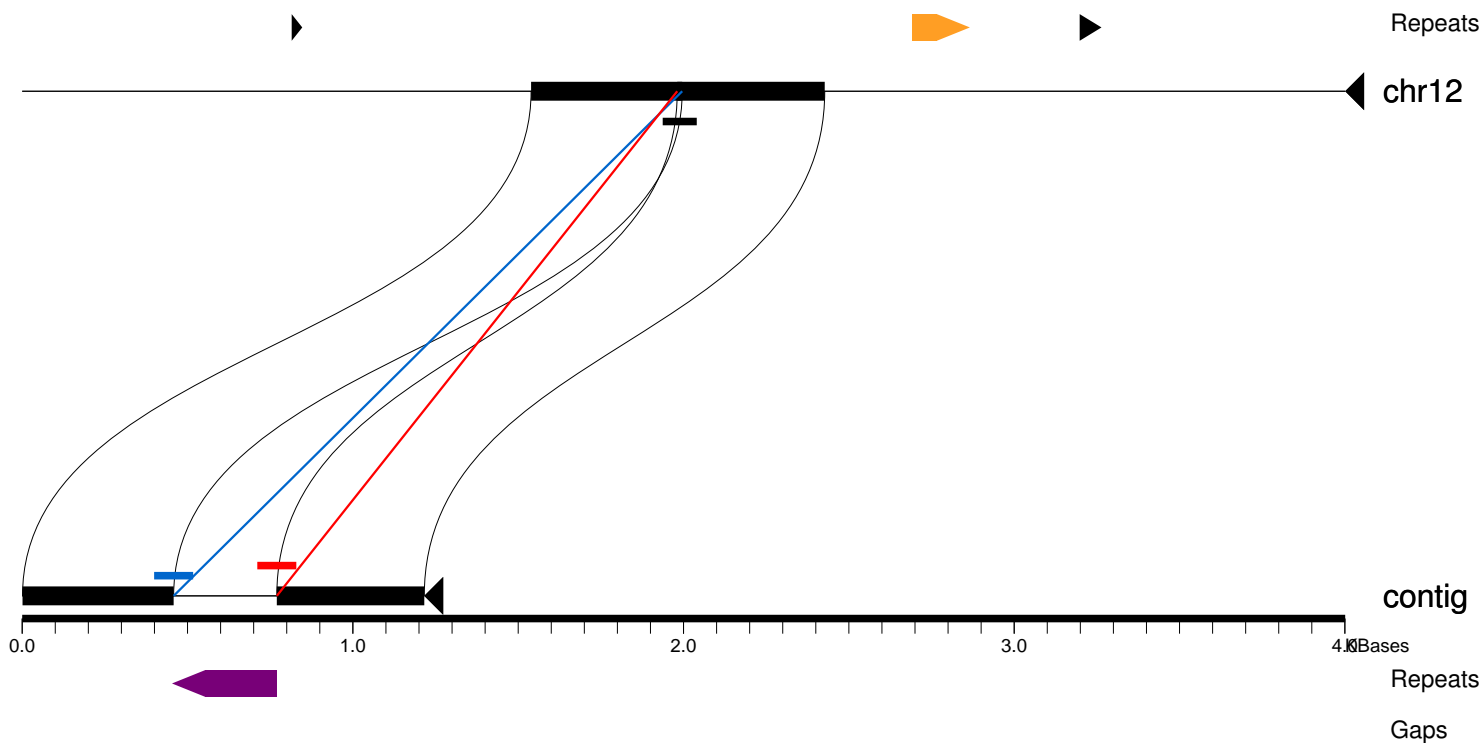



siteID: chr12\_26958667 Scaffitig14 + Breakpoint: chr12:26958660

chr12:26958601-26958716

Overlap Length: 0 INS size: 398 Genotyped: Yes

```
left ATAAATT-ACATAG-CACGCTAAGGGATAAAACACTATAGAAAAAAGGAA-ACATAAAACA-CGGTAAAAC
chrom ATAAATT-ACATAG-CACGCTAAGGGATAAAACACTATAGAAAAAAGGAA-ACATAAAACA-CGGCTCTAC
right AGAAGGTGAGGGAGACATGC-AGGAGAACTGCATTCCAGGCAGAGGGAATAGCCAGGGCAACGACTCTAC
      *1**11*1*111**1**1**1*1*1**1111**1*11**11*1*1****1*111*111**1**12222**
```

```
left TGGCCGGGCACCGTGGCTCACACCTGTAATCCCAGCACTTT--GGAAGGCCAA---GG
chrom AGT---GGGACCGTGT-TCA---CTATGTTCCAAGACCTGCAAGGAAG-CTAATATGG
right AGT---GGGACCGTGT-TCA---CTATGTTCCAAGACCTGCAAGGAAG-CTAATATGG
      2*2222**2*****22***222**2*22***2**22**2222*****2*2**222**
```

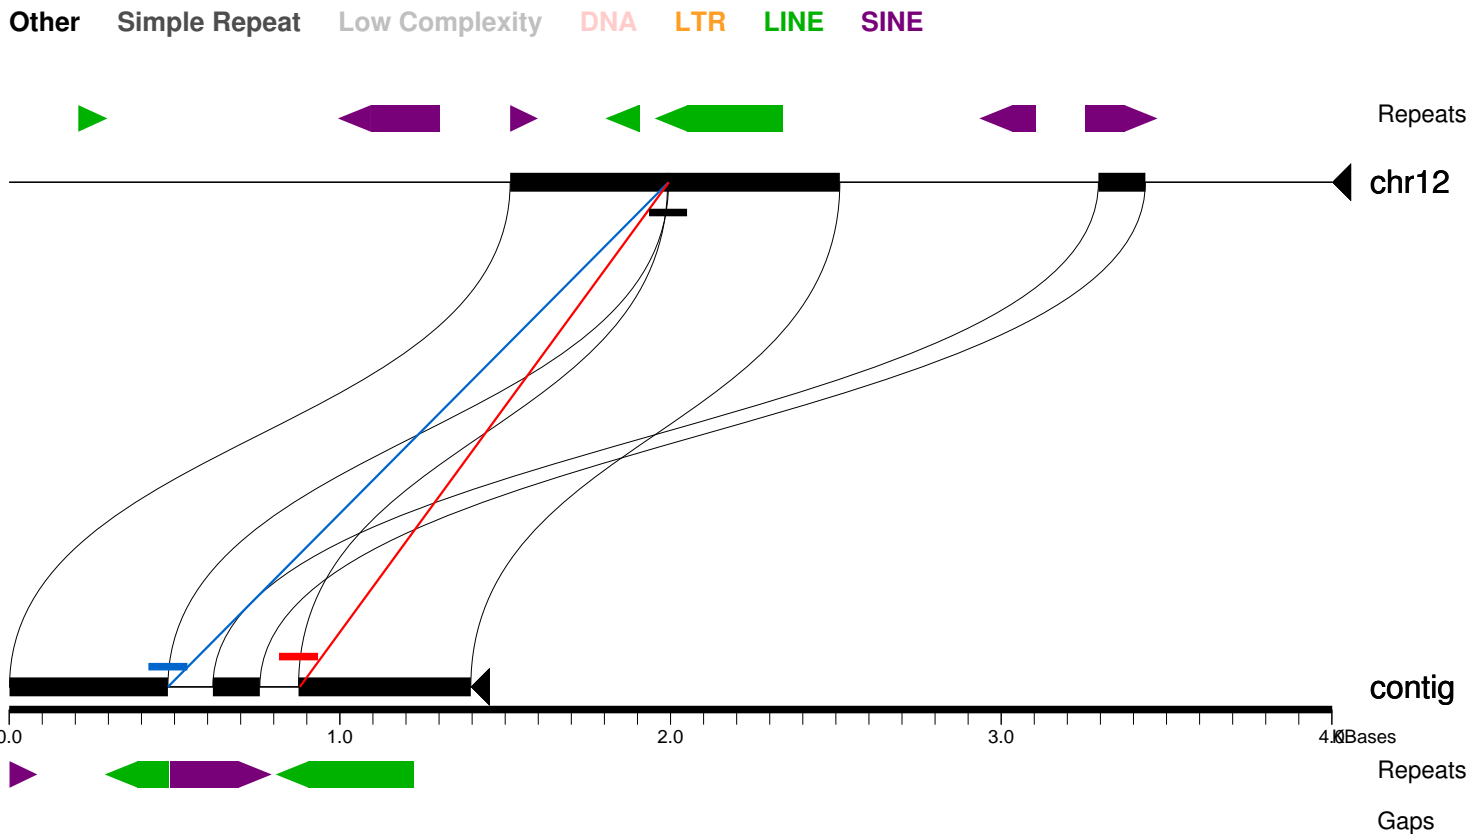





siteID: chr12\_28163311 Scaffitig1 + Breakpoint: chr12:28163320

chr12:28163272-28163379

Overlap Length: 12 INS size: 445 Genotyped: No

```
left   TGCTCTAGGAGTTATCAGAAAGAGAAGAGAGTAAAAATCTAACCTGT-----ATAAAAAAGATGTG
chrom  TGCTCTAGGAGTTATCAGAAAGAGAAGAGAGTAAAAATCTAACCTGT-----ATAAAAAAGATGTG
right  NNNNNNNNNNNNNNNNNNNNNNNNNNNNNNNNNNNNNNNNNNNNNNNNNNNNNNNNNNNNNNNNNNNNNNN
11111111111111111111111111111111111111111111111111111111111111111111111111
*1*****
```

```
left   GGCCGGGCGCGGTGGCTCACGCCTGTAATCCCAAGCAACTTTGGGAGGCCGAGGCGGGTGA
chrom  GACTC-----TGGTAGATTTCTTAAAAGGAAGGAAGGAAGGAAGGAAGGAAGGAAGGAAGGAAGGAAG
right  GACTC-----TGGTAGATTTCTTAAAAGGAAGGAAGGAAGGAAGGAAGGAAGGAAGGAAGGAAGGAAG
*2*222222222***222*222**22**2222**2*22*2*2**22*22***222*222*
```

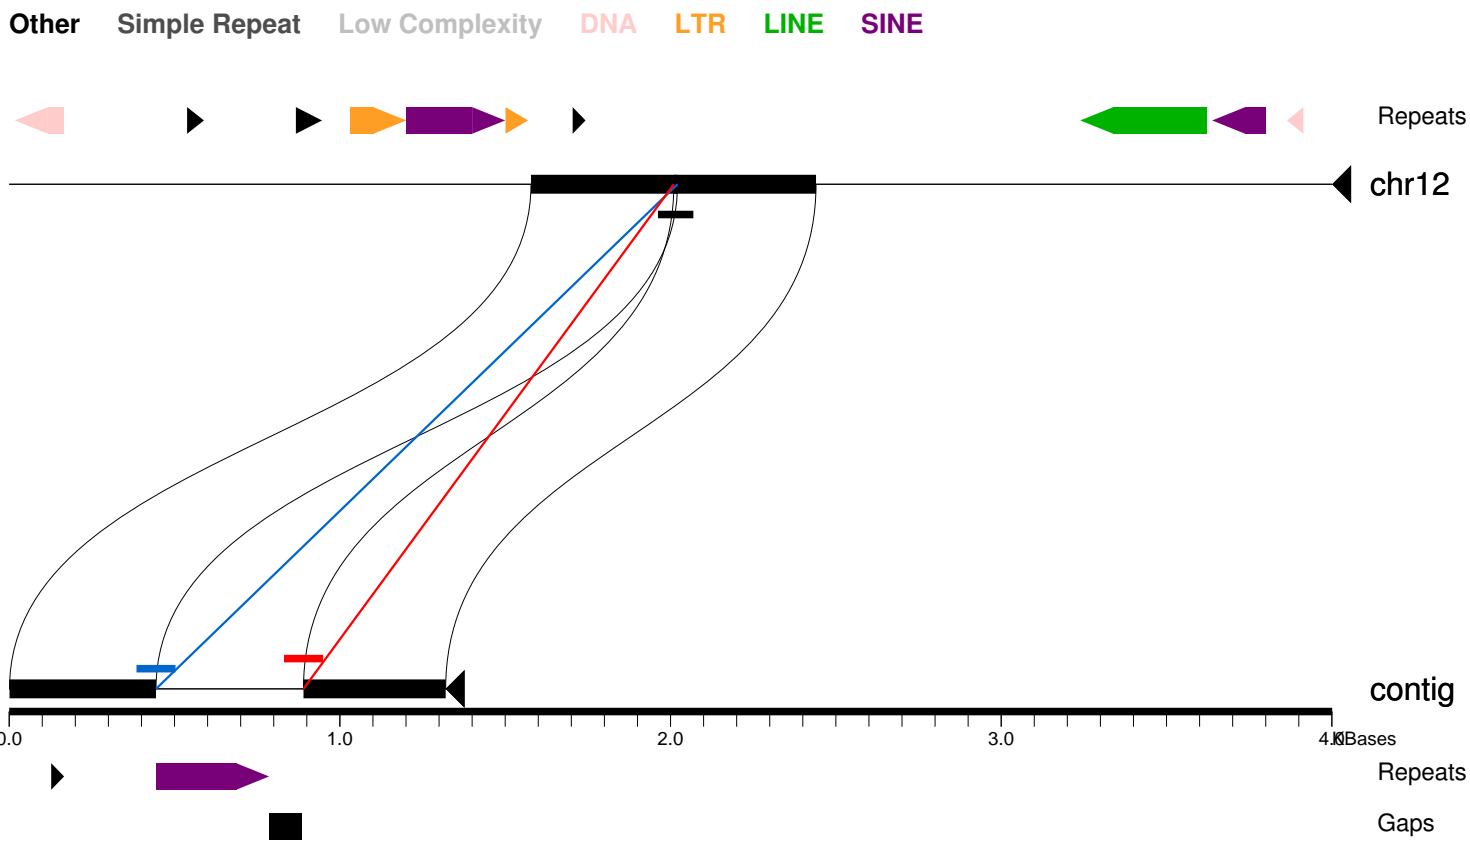

siteID: chr12\_28438609 Scaffoldig6 + Breakpoint: chr12:28438597

chr12:28438563-28438656

Overlap Length: 8 INS size: 306 Genotyped: Yes

```

left      -----GG-----ATAATACTTAGATGA-----ACCTGCCAGTGTTTATCTGTGTTTTF
chrom    -----GG-----ATAATACTTAGATGA-----ACCTGCCAGTGTTTATCTGTGTTTCTT
right    CCACCCGCCTCGGCCTCCCAAAGTGCTGGGATTACAGGCGTGAGCCACCGCGCCC GGCCCTGTGTTTCTT
          111111111111**1111111*1*1*1**11***1*111111111*1**11*11*11111111******2**
  
```

```

left      TTTTTFPTTTTTTTTTTGGAGACGGAGTCTCGCTCTGTTCGCCAGGTCGGACTGCGGACTGCAGTGGCGCAAT
chrom    TATTTAAATTTATTTTC-----CTTTATTTAAGTTTCTATGGCTGATTTCC-----CAAT
right    TATTTAAATTTATTTTC-----CTTTATTTAAGTTTCTATGGCTGATTTCC-----CAAT
          *2***222***2***2222222222222222**2*22222**2*222*22**2**2*2*222222**
  
```

```

left      CTCG
chrom    ----
right    ----
          2222
  
```

Other Simple Repeat Low Complexity DNA LTR LINE SINE

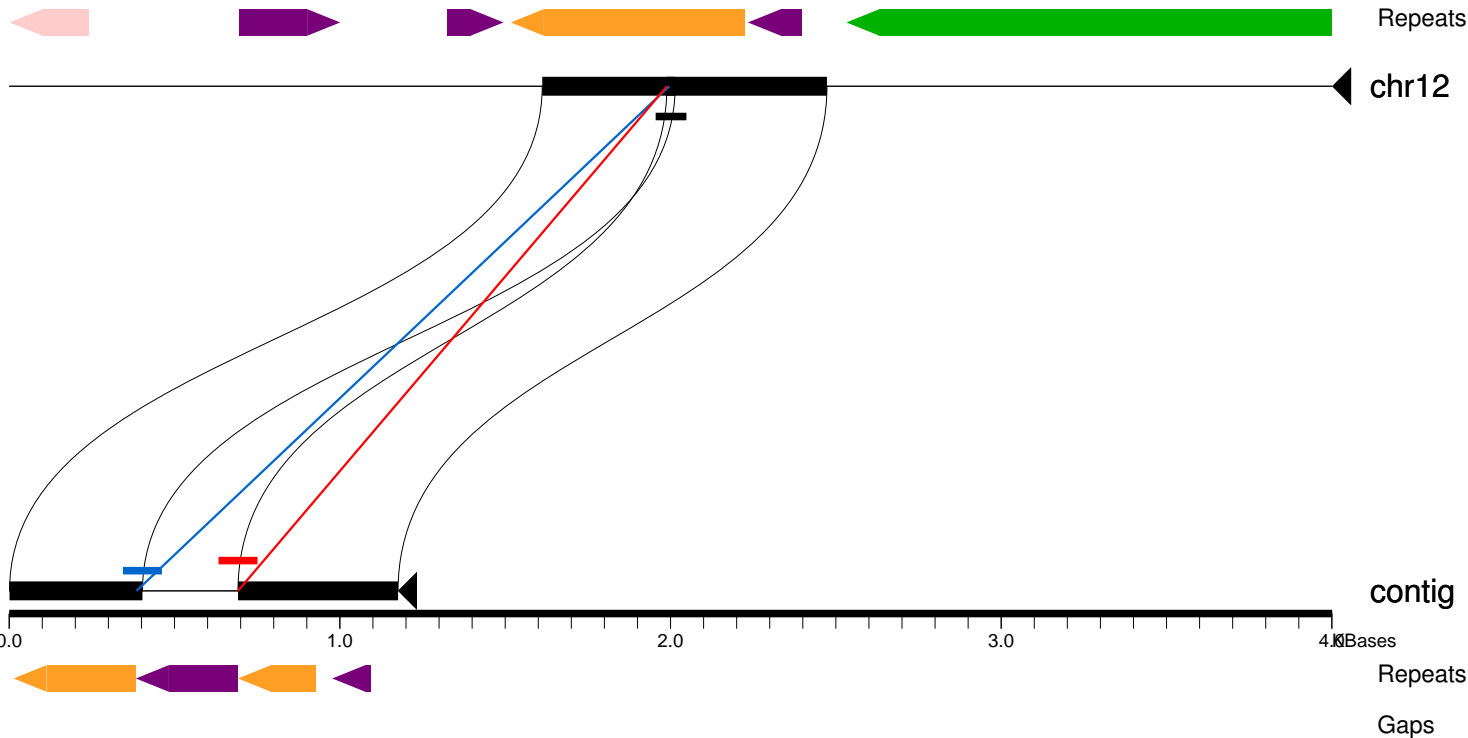

siteID: chr12\_30420638 Scaffitg5 + Breakpoint: chr12:30420646  
 chr12:30420611-30420705  
 Overlap Length: 12 INS size: 303 Genotyped: Yes

```

left  TAGTTT-----AGAGCTGCTTGTAATAATTT-----CTCACTTTTAAATTTCTTTT
chrom TAGTTT-----AGAGCTGCTTGTAATAATTT-----CTCACTTTTAAATTTCTTTT
right CCGCCCGCCTCGGCCTCCCAAAGTGCTGGGATTACAGGCGTGAGCCACCGCGCCCGGCCAAATTTCTTTT
      11*11111111111111111111111111111111**1***1111**1*1111*11111111111*1*1*1111*****

left  TTTTTTTTTTTTTTTTTTTTTTTTGGAGACGGAGTCTTGCTCTGTCACCCAGGCTGGAGTGTAGTGGCACGA
chrom TAAATTATTGATTT-----GTACTCTAGTTTTCTAACAC-----TGCAGTTCCATCA
right TAAATTATTGATTT-----GTACTCTAGTTTTCTAACAC-----TGCAGTTCCATCA
      *222**2**22**222222222222222222*2*2***2*2*2*2*2**2*222222222**2***22**22*

left  TCT
chrom GA-
right GA-
      222

```

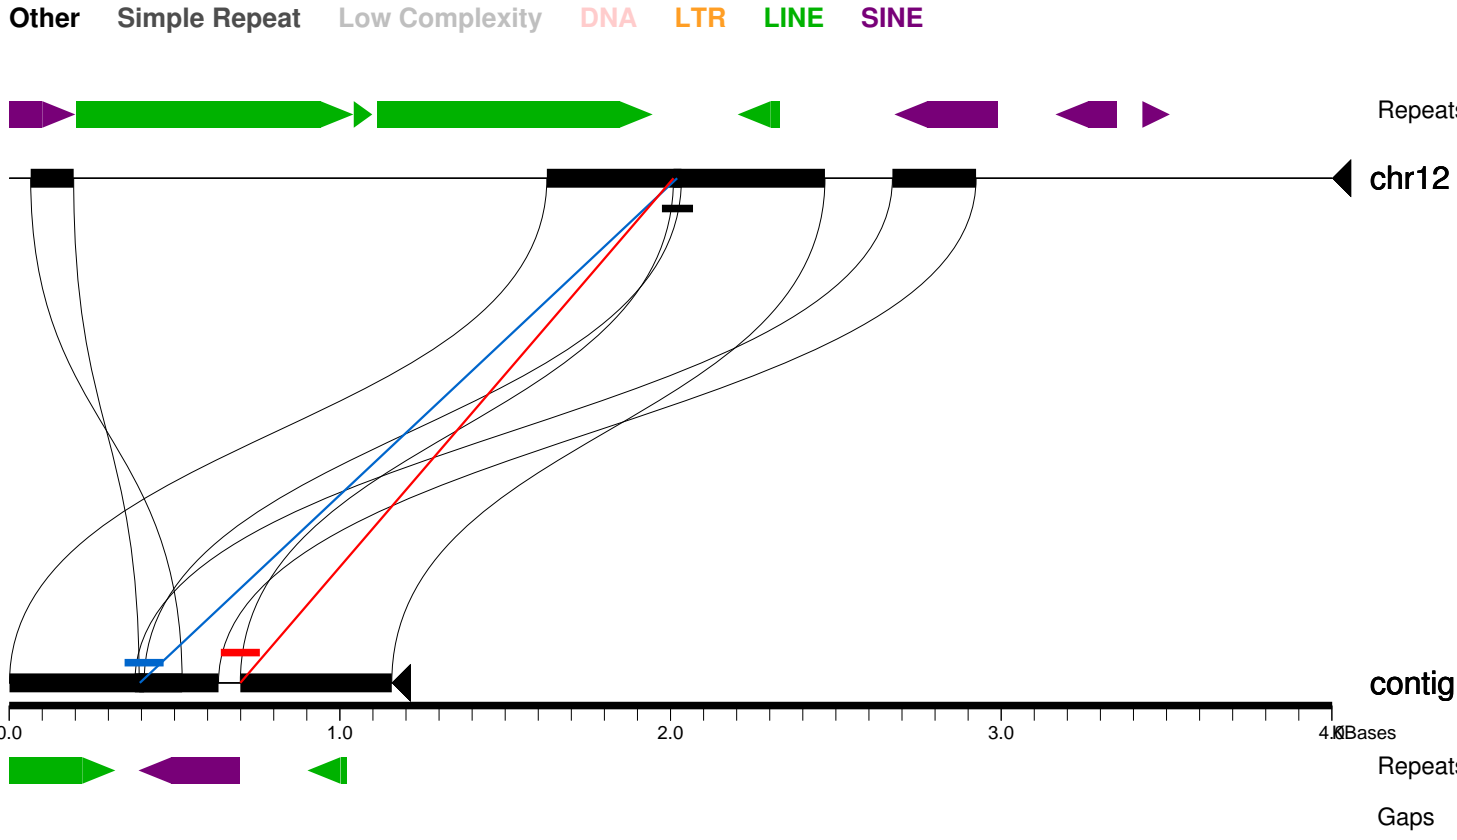

siteID: chr12\_30471057 Scafftig4 - Breakpoint: chr12:30471069

chr12:30470909-30471229

Overlap Length: 1 INS size: 297 Genotyped: Yes

left -ATGTGTTTTAAAAATCATTTTTTAATATTTGTGCATGTATGTTTCACAACAGGCTTAT-TTACAAT-AGCTAA  
chrom TATTGTTTTAAAAATCATTTTTTAATATTTGTGCATGTATGTTTCACAACAGGCTTAT-TTACAAT-AGCTAA  
right AG--GCAGGAGAATG-----GCGTGAA----CCCGGGAGGCGGAGCTTGCAGTGAGCCGA  
N1111\*11111\*1\*\*\*1111111111111111111\*\*1\*\*1\*1111\*1\*111\*\*\*\*11\*11\*\*1\*\*1\*1\*\*\*11\*

left AAGATGGAAACAACCCAAGAGCTCACTGATGGATGAATGGATAAACATAGTGTG-CTACGGATATAAGTG  
chrom AAGATGGAAACAACCCAAGAGCTCACTGATGGATGAATGGATAAACATAGTGTG-CTACGGATATAAGTG  
right --GAT-----CCCGCCACTGCACTCCAGCCTGGGCG-----ACAGAGCGGAGACTCCGTCTCAAAAAA  
11\*\*\*111111111\*\*\*111\*111\*\*\*\*111\*11\*\*111\*11111\*\*\*1\*\*1\*1\*1\*\*1\*\*11\*11\*\*111

left AAAATTATTTAGCCTTAAAAAGGAGGCGGGCGGGTGGCTCACGCCTGTAA--TCCAGCACTTTGGGA  
chrom AAAATTATTTAGCCTTAAAAAGGAAA---GAAACTCTAGCACACAC-TGCAACATAGAGGAACCTTGAGG  
right AAAA-----AAAAAAAAA---AAAACTCTAGCACACAC-TGCAACATAGAGGAACCTTGAGG  
\*\*\*1111111111111111\*\*\*11\*222221222\*22\*2\*\*2\*\*\*2\*2\*\*2\*\*22\*2222\*2\*\*2\*\*\*2\*2

left GGCCGAGGCGG-GCGGATCACG--AGGTC---AGGAGATCGA-----GACCATC  
chrom ATATTATGCTAAGTGAATTAAGCCAGGCACTAAAGGAGAAAACACTGTATAATTCCTTTTATATGAGCTTC  
right ATATTATGCTAAGTGAATTAAGCCAGGCACTAAAGGAGAAAACACTGTATAATTCCTTTTATATGAGCTTC  
22222\*2\*\*222\*2\*2\*\*2\*2\*22\*\*\*222222\*\*\*\*\*222\*22222222222222222222\*\*2\*2\*\*

left CTGG-CTAA-----CACGGTGAAACCCCGTCTCTACTAA-----A-----  
chrom CTAGACTCATCAAAATTCATGGAGATAGAGAGT-TAAACAATGTTTGCCA-----  
right CTAGACTCATCAAAATTCATGGAGATAGAGAGT-TAAACAATGTTTGCCAAAGGCT  
\*\*2\*2\*\*2\*222222\*\*2\*\*2\*\*2\*2222\*\*2\*22\*\*2\*22222222\*111111

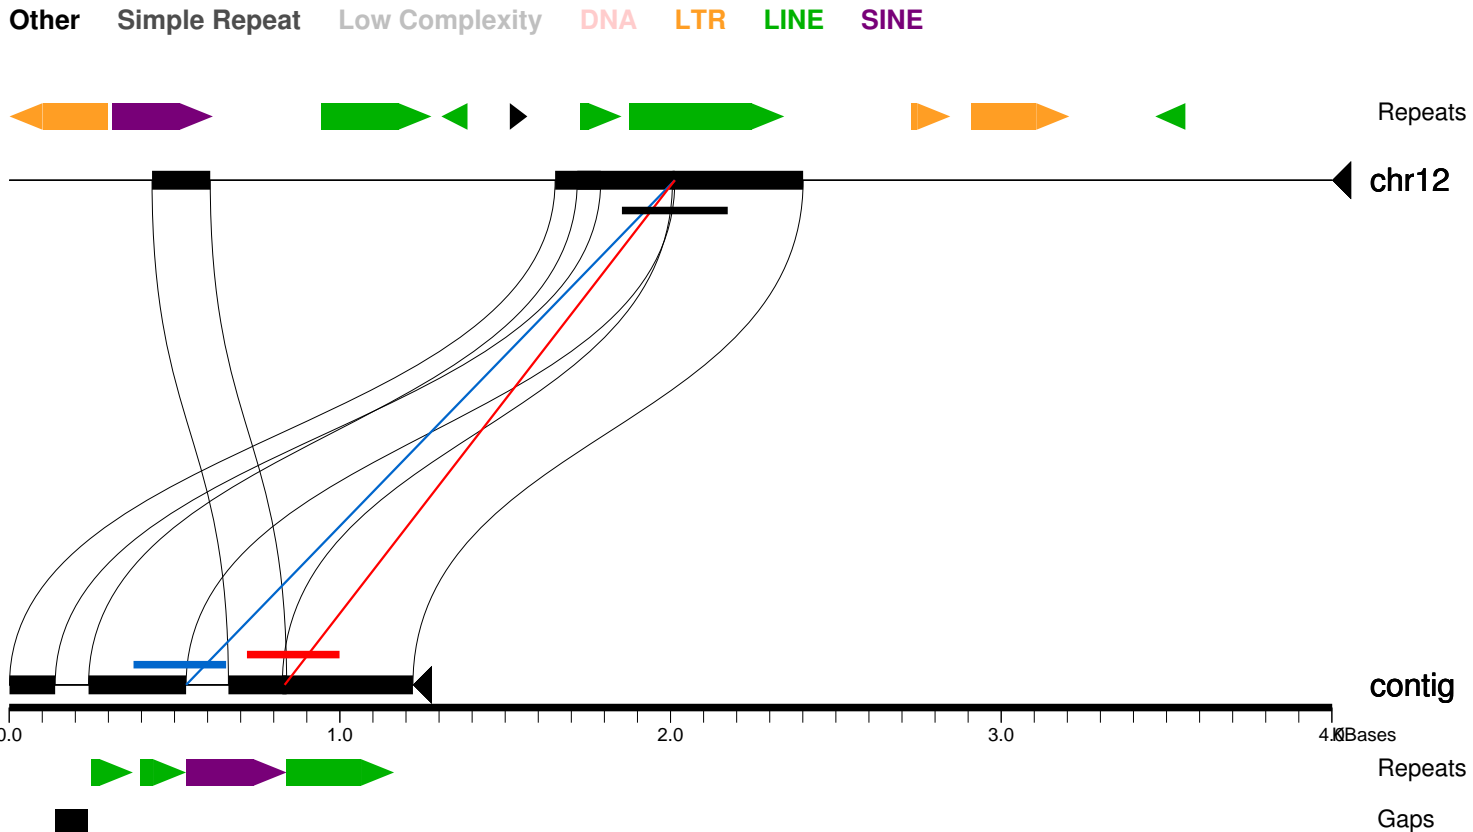



siteID: chr12\_31406641 Scafftig4 + Breakpoint: chr12:31406636

chr12:31406583-31406695

Overlap Length: 7 INS size: 504 Genotyped: No

```

left  GAGGTGACCA--GATGTCAATAATGTTGGGAATTTAAAAATGCATGTACCACACAT-----GAACACAN
chrom GAGGTGACCA--GATGTCAATAATGTTGGGAATTTAAAAATGCATGTACCACACAT-----GAACACAA
right CCGCCCGCCTCGGCCTCCCAAAGTGCTGGGATT---ACAGGCGTGAGCCACCGCGCCCGGCCGAACACAA
      11*1111**111*1111*1*1*1**1*****1*111*1*1**1*11***111111111111*****2

```

```

left  NNNNNNNNNNNNNNNNNNNNNNNNNNNNNNNNNNNNNNNNNNNNNNNNNNNNNNNNNNNNNNNNNNNNNNN
chrom TTCTTTAAATGCAGCTGCAGGAAGTTCCGTTTGGGGGTCATCCTCTTTGAAA-----
right TTCTTTAAATGCAGCTGCAGGAAGTTCCGTTTGGGGGTCATCCTCTTTGAAA-----
      22222222222222222222222222222222222222222222222222222222222222222222

```

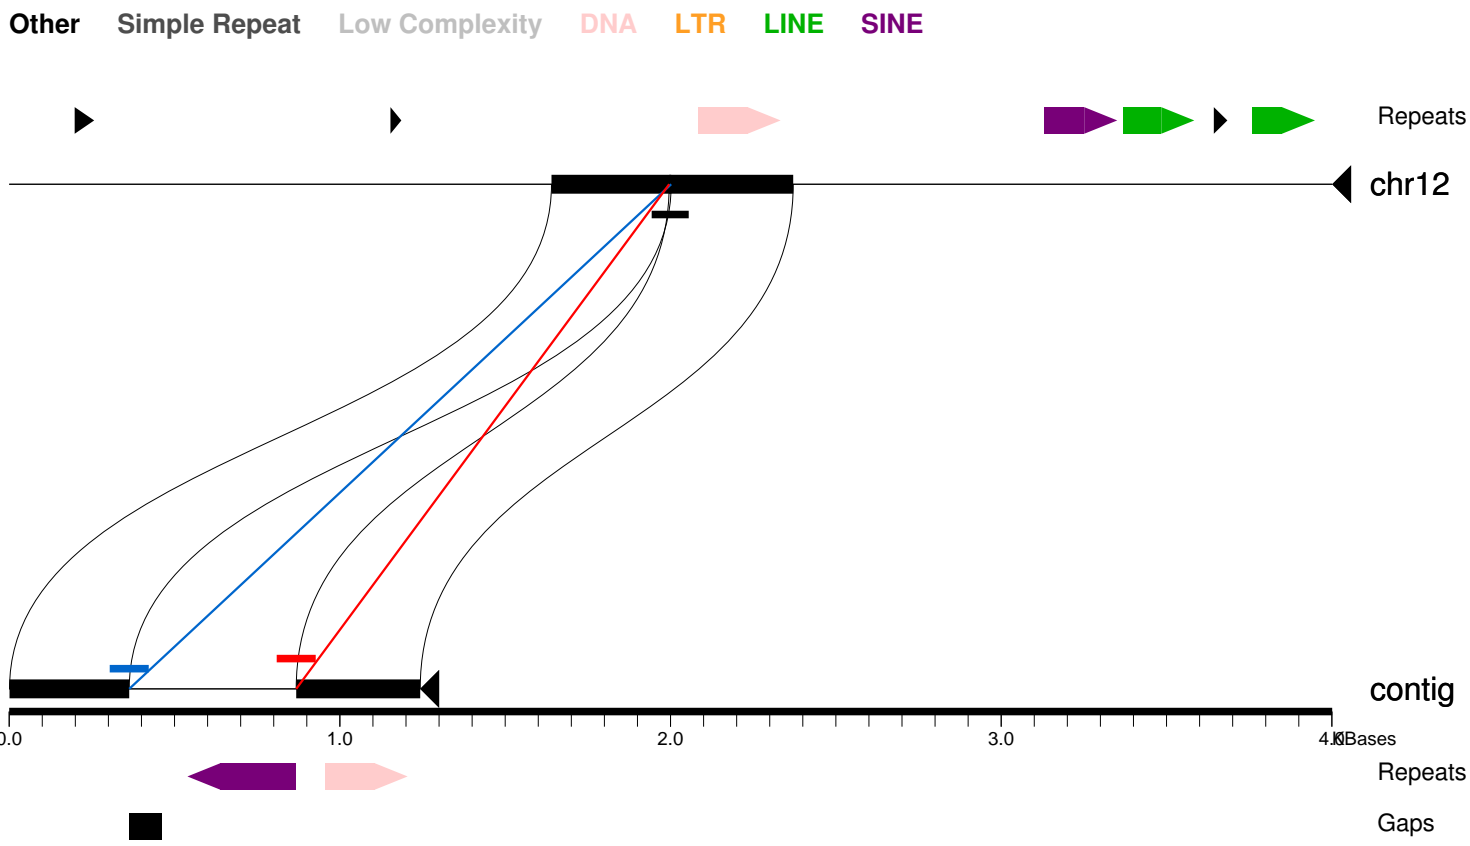

siteID: chr12\_32076411 Scafftig4 - Breakpoint: chr12:32076414

chr12:32076368-32076473

Overlap Length: 14 INS size: 300 Genotyped: Yes

```
left  CATGACT---TCCTGGG--ACAAATCTAT-----TCCAGAACCAAAGGGCTTACTGAAATAATTGAT
chrom CATGACT---TCCTGGG--ACAAATCTAT-----TCCAGAACCAAAGGGCTTACTGAAATAATTGAT
right CTGCACTCCAGCCTGGGCGACAGAGCGAAACTCCGTCTCAAAAAAAAAAAAAAAAAAAAAAAAAAAATAATTGAT
      *111***1111*****11***1*1*1*1111111111**1*1**11***111111*111*****
```

```
left  CTCGGCCAGGCGCGGTGGCTCACGCCTGTAATCCCAGCACTTTGGGAGGCCGAGACGGGCGG
chrom CTCAGT-----GGTTTCTAAGGAAA-TATTTAAATCAAAAAGGGGA-----AAATCTGAAA
right CTCAGT-----GGTTTCTAAGGAAA-TATTTAAATCAAAAAGGGG-----AAATCTGAAA
      **2*22222222***22**2*2*2222**2*222*2**2222***122222*2*222*222
```

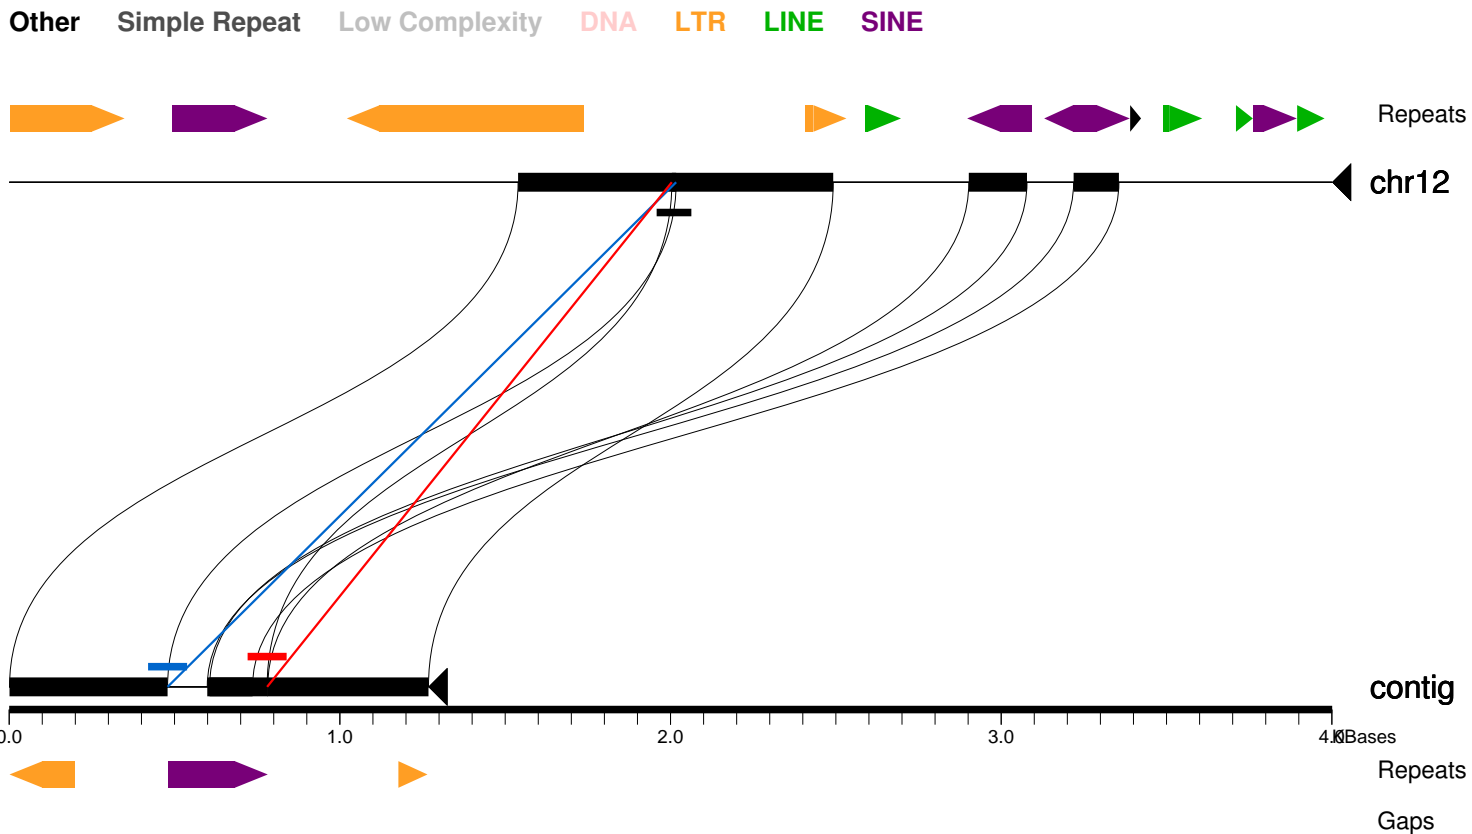

siteID: chr12\_32358645 Scafftig2 + Breakpoint: chr12:32358650  
chr12:32358603-32358709  
Overlap Length: 13 INS size: 483 Genotyped: No

```
left    TG-----ATGTATAAGTGATCAATTTGCACTCTTTAAATATGTGCAATATATTATATGTCAAT  
chrom   TG-----ATGTATAAGTGATCAATTTGCACTCTTTAAATATGTGCAATATATATTATATGTCAAT  
right   CCGCCCGCCTCGGCCTCCCAAAGTGCTGGGATTACAGGCGTGAGCCACCGCGCCCGGCCTATATGTCAAT  
        11111111111111111111*1111*****1*1111**1**11*1*1*111*1111111111111111*  
  
left    TTGTTTTNNNNNNNNNNNNNNNNNNNNNNNNNNNNNNNNNNNNNNNNNNNNNNNNNNNNNNNNNNNN  
chrom   TT-----TGACATATGTATATACTTGCGAAATCATCAACACAACCAAGATAATG  
right   TT-----TGACATATGTATATACTTGCGAAATCATCAACACAACCAAGATAATG  
        **222222222222222222222222222222222222222222222222222222222222
```

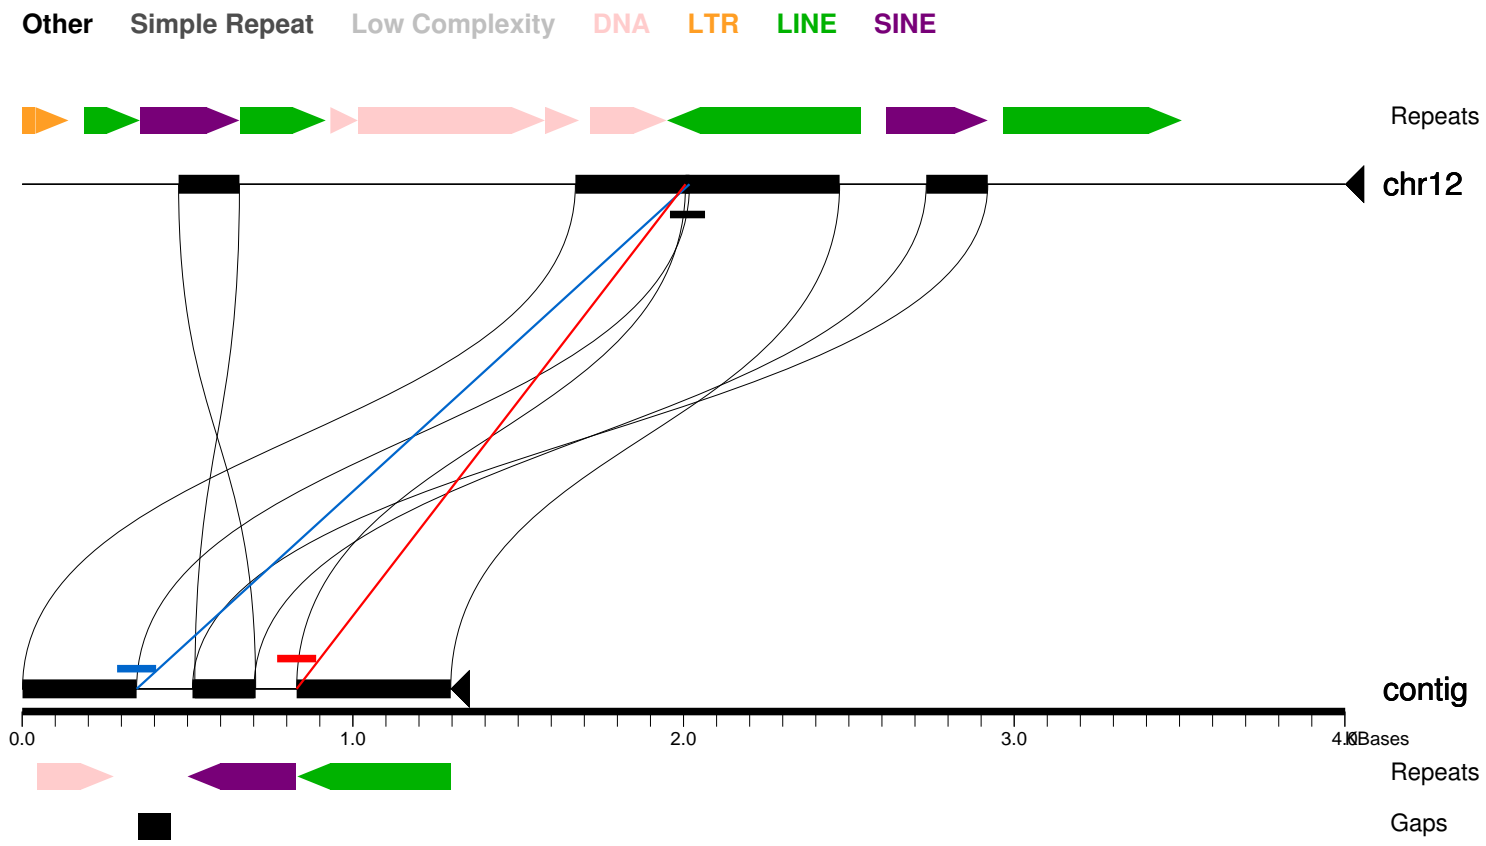





siteID: chr12\_40210415 Scafftig2 - Breakpoint: chr12:40210386

chr12:40210348-40210435

Overlap Length: 22 INS size: 286 Genotyped: Yes

```
left  TTGTGCACA-----TGTAC-----CCT-----AGAACTT-CTT-----AAAGTATAATA
chrom TTGTGCACA-----TGTAC-----CCT-----AGAACTT-CTT-----AAAGTATAATA
right GTGAGCCGAGATCGCGCCACTGCACCTCCAGCCTGGGCGACAGAGCGAGACTCCGTCTCAAAAAAAAAA
1**1**11*111111111111**1**11111***1111111***1*111***1111111***11*1**1*
```

```
left  AAAAAAAAAAGAAAGAAAAATCAAGCGCGGTGGCTCACGCCTGTAATCCCAGCACTTTGGGAGGCCGAGGCGG
chrom AAAAAAAAAAGAAAGAAAAATCA-----AGGGTAA-----GTAATACAAGAATTAT-----
right AAAAAAAAAAAAAAAAAAGAAAAATCA-----AGGGTAA-----GTAATACAAGAATTAT-----
*****1*****222222**2*2*22222*****2*2*2*2*2*22222222222222222222
```

```
left  GCGGATCACG
chrom ----ATTA-G
right ----ATTA-G
2222**2*2*
```

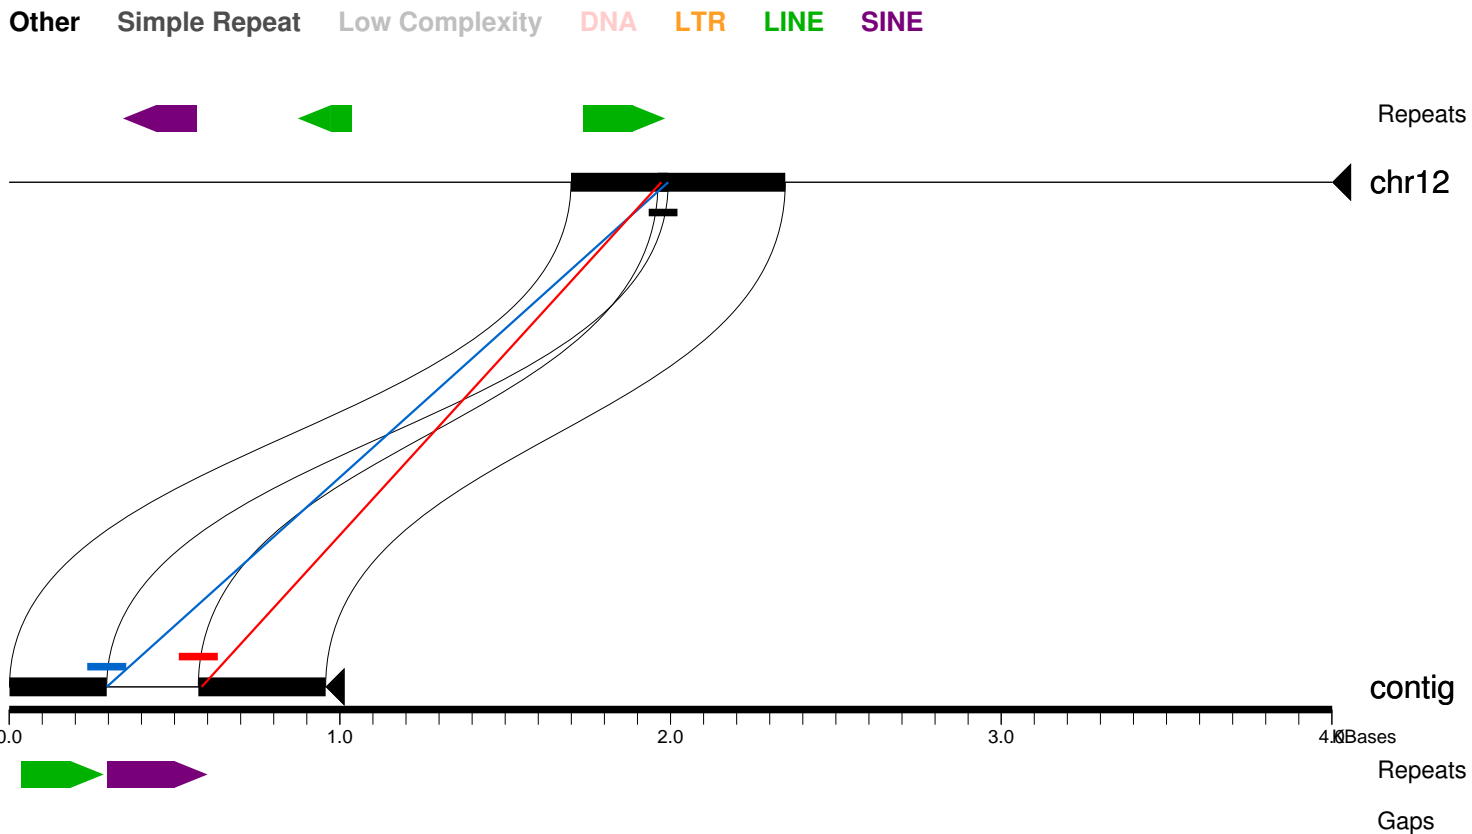

siteID: chr12\_40673031 Scaffig1 + Breakpoint: chr12:40673010

chr12:40672968-40673069

Overlap Length: 18 INS size: 319 Genotyped: Yes

```
left  ATTTAATACACAT-----TATTAAA-TAAT--CAATAAAGTACTATGTTT-----GCCAATAGTTT
chrom ATTTAATACACAT-----TATTAAA-TAAT--CAATAAAGTACTATGTTT-----GCCAATAGTTT
right GATCCGCCCGCCTCGGCCTCCCAAAGTGCTGGGATTACAGGCGTGAGCCACCGCGCCCGGCCAATAGTTT
      11*111111*1*1*111111*111***1*11*111*1**1**111*11*111111111111*****
```

```
left  ACTTTTFFFFFFFFFFFFFFFFFFFFFFFFFFFFFFFFFFFFFFFFFFFFFFFFFFFFFFFFGGAGACGGAGTCTCGCTCT
chrom ACTTTTAAACCTTACTGTATTTAATATCCCTACTGTATTT-----AATATCCC---
right ACTTTTAAACCTTACTGTATTTAATATCCCTACTGTATTT-----AATATCCC---
      *****22222**22*2*2***22*2*222*22*2***222222222222222*2*2**2*222
```

Other Simple Repeat Low Complexity DNA LTR LINE SINE

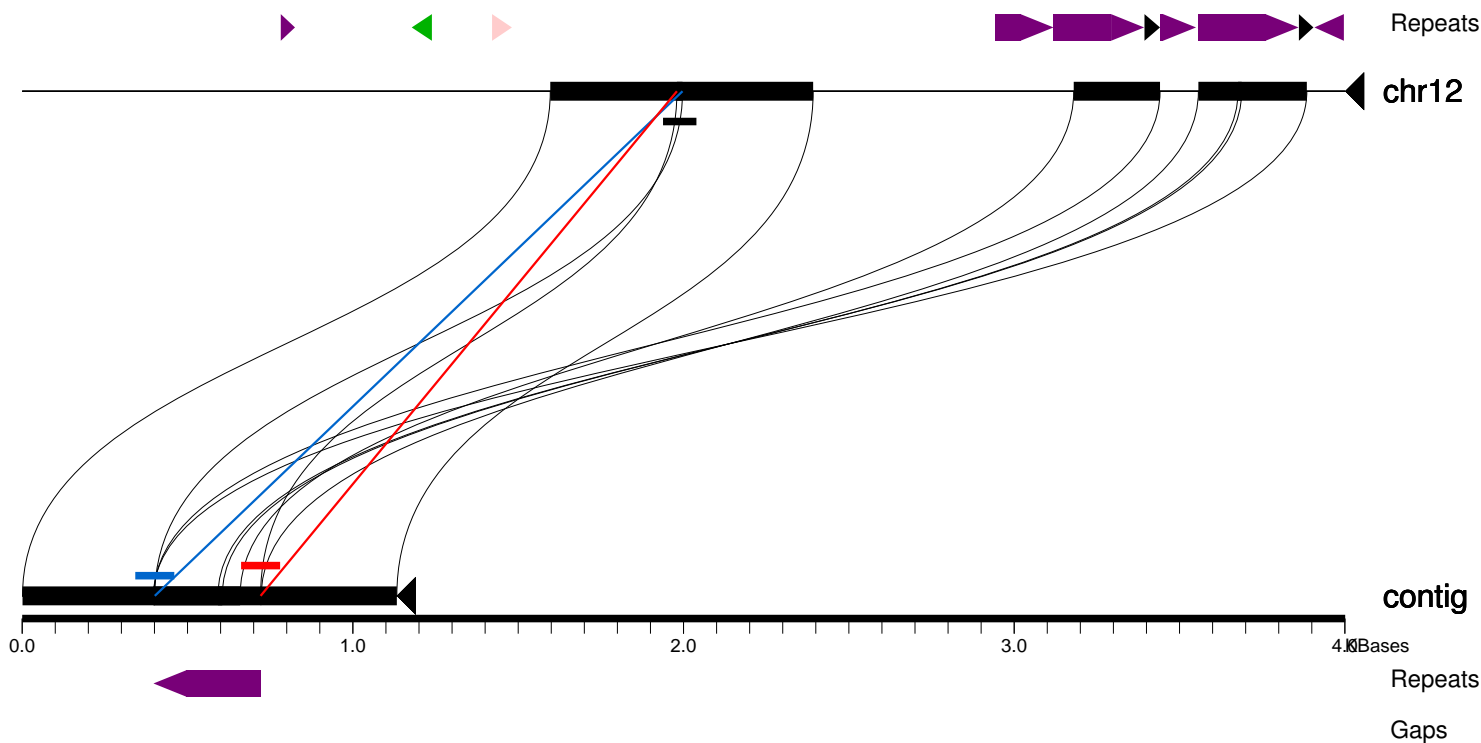

siteID: chr12\_41847721 Scaffoldig3 - Breakpoint: chr12:41847712

chr12:41847664-41847768

Overlap Length: 12 INS size: 229 Genotyped: Yes

```
left AAACAGAGTT-TCCTGTTT-----ATAAGGGTGCGTTTTTCAGCTCACTTTAAA---ATTTAATC
chrom AAACAGAGTT-TCCTGTTT-----ATAAGGGTGCGTTTTTCAGCTCACTTTAAA---ATTTAATC
right CGCCACTGCACTCCCGCCTGGGCCGAGAGCAAGACTCCGTCTCAAAAAAAAAAAAAAAAAAAAAAATTTAATC
      111**11*111***1*11*111111111111***11*1***1*111*1111*1111***111*****
```

```
left TCCGATCGAGACCATCCTGGCTAACACGGTGAAACCCCGTCTCTACTAAAAAAATACAAAAA
chrom TCCGATCGAGACCATCCTGGCTAACACGGTGAAACCCCGTCTCTACTAAAAAAATACAAAAA
right TCCGATCGAGACCATCCTGGCTAACACGGTGAAACCCCGTCTCTACTAAAAAAATACAAAAA
      ***22*2**2*222*222222*2*2*2*2***222222222222*22**2*22222**2*
```

Other Simple Repeat Low Complexity DNA LTR LINE SINE

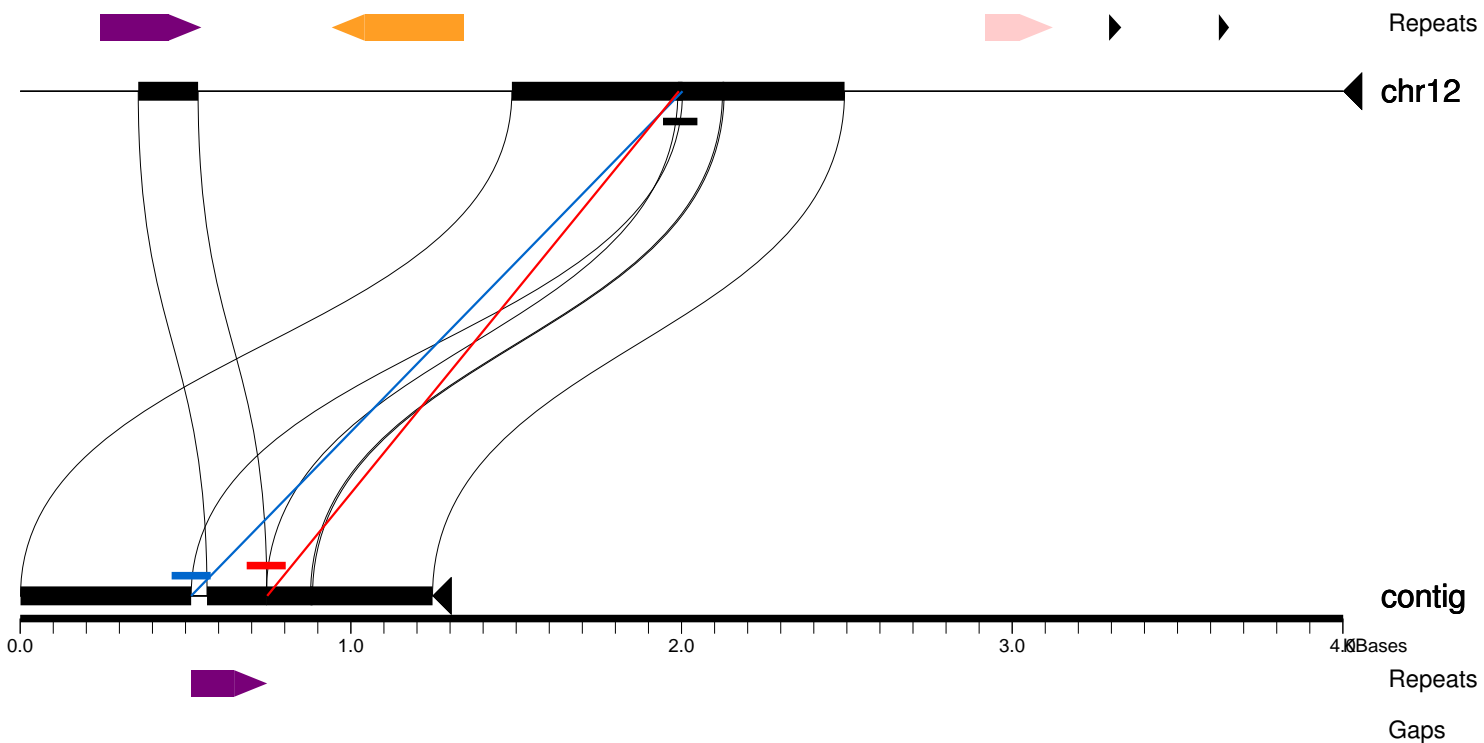

siteID: chr12\_42482654 Scaffitig7 - Breakpoint: chr12:42482686

chr12:42482639-42482740

Overlap Length: 13 INS size: 79 Genotyped: Yes

```
left    C--CCAGGTTATCC--CTGAGGTTCACTAGCACGCTGAGGGAGAGG-----AAATGAAAGAA
chrom   C--CCAGGTTATCC--CTGAGGTTCACTAGCACGCTGAGGGAGAGG-----AAATGAAGAA
right   AGTCCGGCCTGGGCGACAGAGCGAGACTCCGTCTCAAAAAAAAAAAAAAAAAAAAAAAAAAAAGAA
        111**1*11*111*11*1***1111***1111*1*11*111*1*111111111111111***11*****
```

```
left    CCACCCCGCCACTGCAGTCCGCAGTCCGGCCTGGGCGACAGAGCGAGACTCCGTCTCAAAAAAAAA
chrom   CCACCCCAA----GCACACTT-AGTGAGTC-TGCAGGA---AGCTGCAGTCAATCT-----AC
right   CCACCCCAA----GCACACTT-AGTGAGTC-TGCAGGA---AGCTGCAGTCAATCT-----AC
        *****222222***22*222***22*2*2**222**222***222*2**22***2222222*2
```

Other Simple Repeat Low Complexity DNA LTR LINE SINE

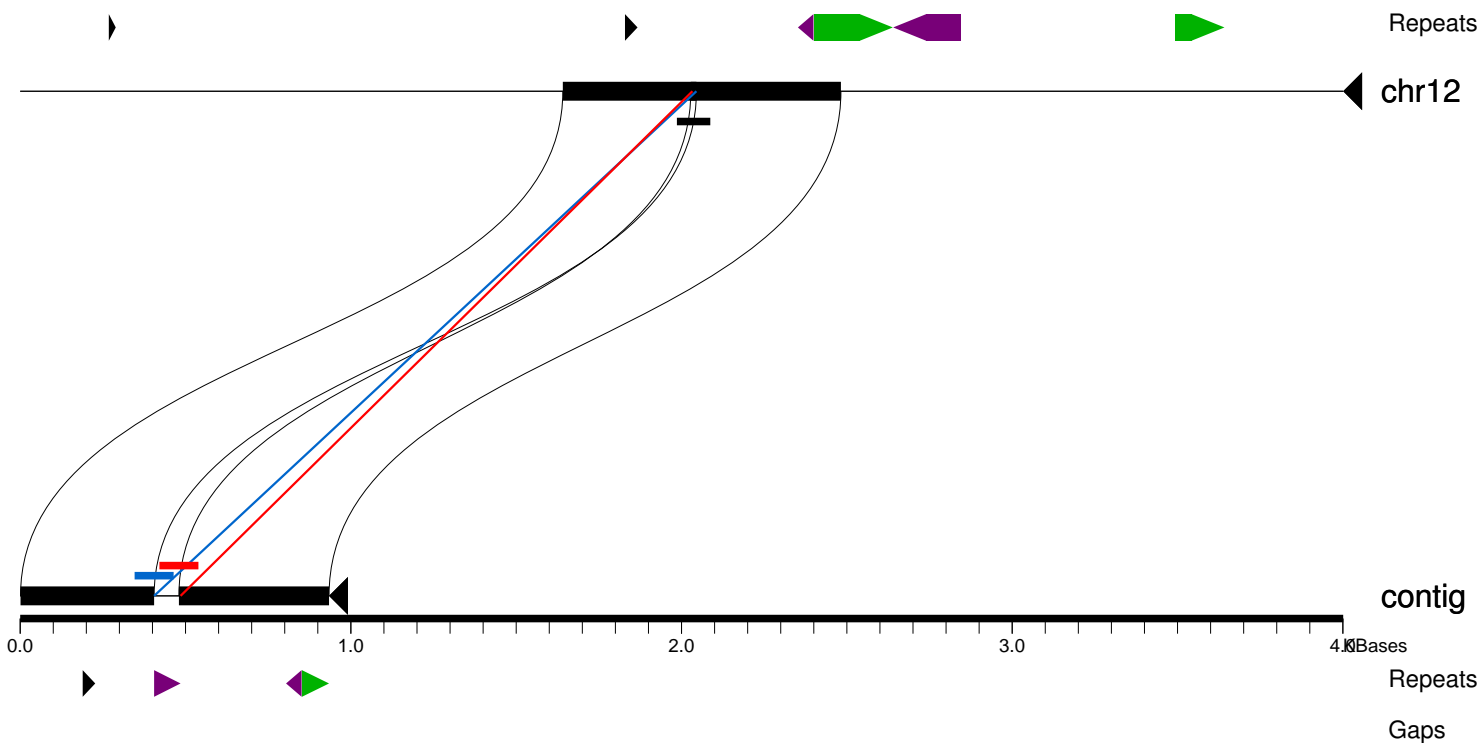

siteID: chr12\_43717948 Scafftig4 + Breakpoint: chr12:43717929

chr12:43717894-43717988

Overlap Length: 12 INS size: 302 Genotyped: Yes

```
left  CCTTTTAA-TGTACCACCCA-----CCAAGACTCTAG--TTTA-----CCAAATATTCT
chrom CCTTTTAA-TGTACCACCCA-----CCAAGACTCTAG--TTTA-----CCAAATATTCT
right CCACCCGCCTCGGCCTCCCAAAGTGTGGGATTACAGGCGTGAGCCACCGCGCCCGGCCCCAAATATTCT
      **11111111*111**1****11111*111**1*11**111*1*1111111111111111*****
```

```
left  TTTTTTTTTTTTTTTTGAGACGGAGTCTTGCTCTGTCGCCAGGTCGGACTGCGGACTGCAGTGGCGCAAT
chrom TAATGTAAC TTTTAA---ATTGAGCCATTCT-TGAATCCCTCTTT-----CATT
right TAATGTAAC TTTTAA---ATTGAGCCATTCT-TGAATCCCTCTTT-----CATT
      *22*2*222*****2222*22***2*2*2**2**222***222*22222222222222222222**2*
```

```
left  CTC-
chrom CTCA
right CTCA
      ***2
```

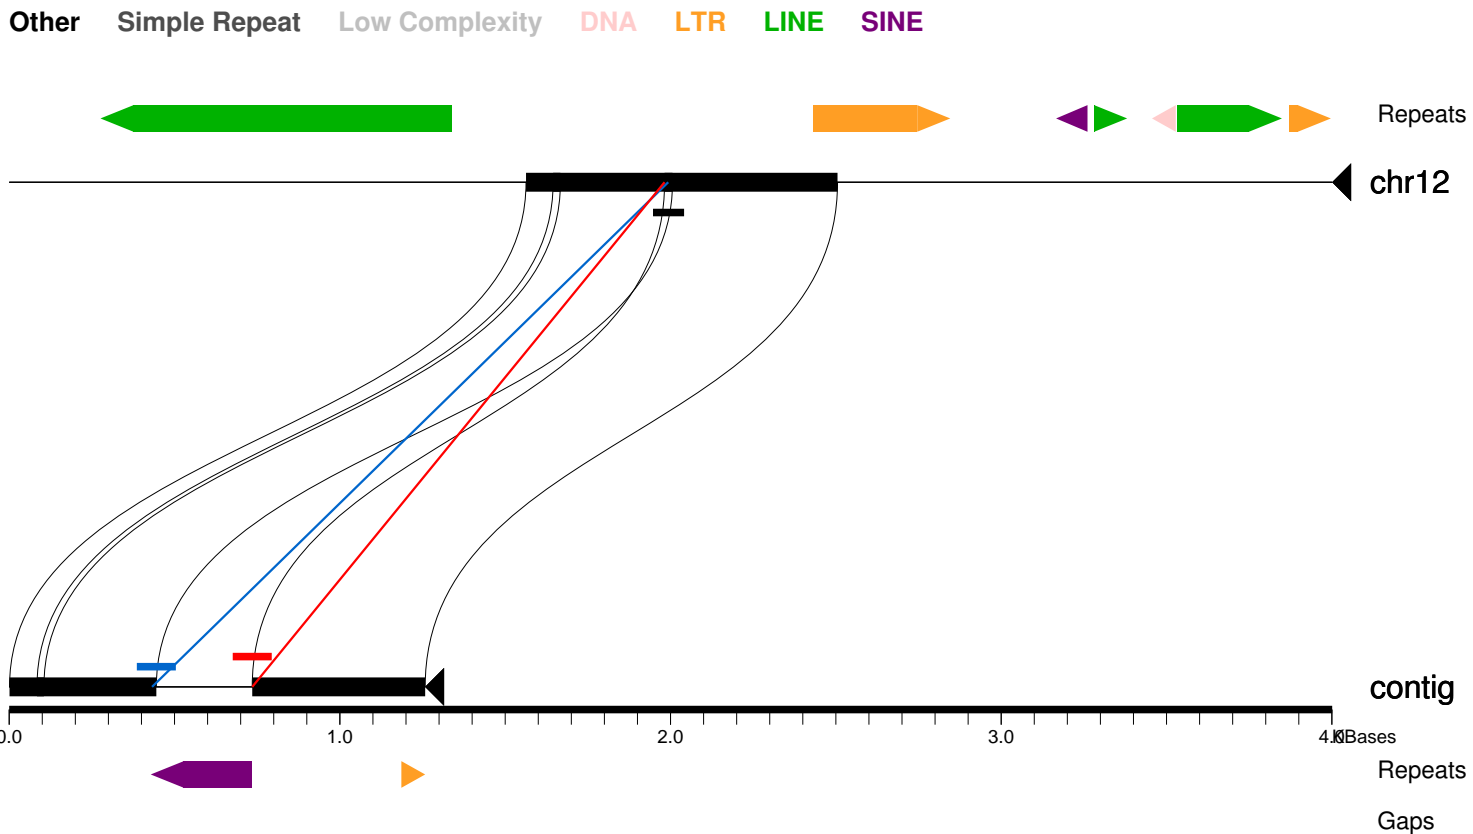

siteID: chr12\_44139551 Scafftig3 - Breakpoint: chr12:44139556

chr12:44139512-44139615

Overlap Length: 16 INS size: 307 Genotyped: Yes

```
left  AATA---AATTCC-CCT----AACTAA---ATACTAC-TCT---ATATAGCAGATGCTTAAAAAAAAATCT
chrom AATA---AATTCC-CCT----GACTAA---ATACTAC-TCT---ATATAGCAGATGCTTAAAAAAAAATCT
right AGTCCGCAGTCCCACCTGGGCGACAGAGCGAGACTCCGTCTCAAAAAAAAAAAAAAAAAAAAAAATAAAAAAAAAATCT
      *1*1111*1*1**1***11112**11*111*1***1*1***111*1*1*11*1*11111*****
```

```
left  CTCTTGGCCGGGCGCGGTGGCTCACGCCTGTAATCCCAGCACTTTGGGAGGCCGAGGCGGGTGG
chrom CTCTTA-----TGAATGTAGATTGTCCCCTCTTCTCTGGAGGACACCATATCCT----
right CTCTTA-----TGAATGTAGATTGTCCCCTCTTCTCTGGAGGACACCATATCCT----
      ****222222222222**22*222*22***222*2*22*2**222***22**2222*222222
```

Other Simple Repeat Low Complexity DNA LTR LINE SINE

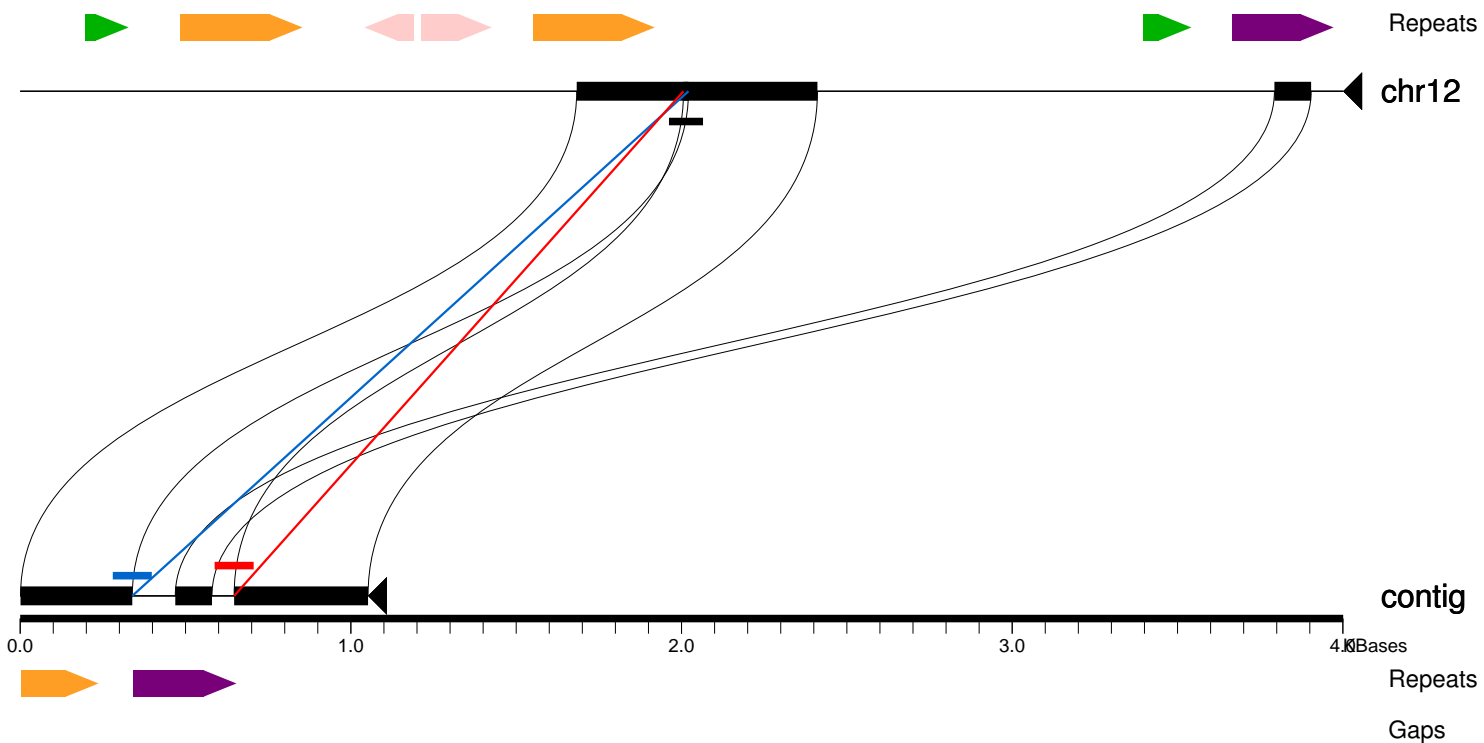

siteID: chr12\_44150109 Scaffitg1 + Breakpoint: chr12:44150142

chr12:44149982-44150310

Overlap Length: 9 INS size: 354 Genotyped: No

```
left -----AGGAATATATAAGATATACTTACTTTTCCTTAATT
chrom GAAATCACTACAAATTCCTCATATCCTAATTTCTTAAGGAATATATAAGATATACTTACTTTTCCTTAATT
right T---TTAGTAGAGACGGGGTTTCACCTTGTTAGCCA-GGATGGTCTC-GATCTCCTGAC-----
N      2N2N22N2N2N2NNNNNNN2N2N22N2N2N2N21***111*1*11***1*1**1**11111111111
```

```
left ACTTAATTTCTGTACAGTTCCCTCACTTTCTTGCCCTAATTGAAATCTGGCTATTTCTTCAGGCTGCTT
chrom ACTTAATTTCTGTACAGTTCCCTCACTTTCTTGCCCTAATTGAAATCTGGCTATTTCTTCAGGCTGCTT
right -CTCATGATCC---AC----CCGCCTCGGCCT--CCCAAAGTG----CTGGG-ATTACAGGCGTGAGCCA
1**1*111***111**1111**11*1*111**11***1**1*1111**11***1*1111**11*11
```

```
left CTTCCTCAGTCCCTCTCAAGTAAAGGCTATNNNNNNNNNNN-----
chrom CTTCCTCAGTCCCTCTCAAGTAAAGGCTATTTTTTCTTTCCACCCATCTACCTTAGGACCTGGAGGCTGT
right CCGCGCCCGGCCT-----AAAGGCTATTTTTTCTTTCCACCCATCTACCTTAGGACCTGGAGGCTGT
*11*11*1*1***1111111******22222222222222222222222222222222222222222
```

```
left -----
chrom AAATATTGGTCTATGTTTGTCACTGTTTCGTTGCAAGCCATTTCTTCCTCTACTACCTCCAAAAACCCCAA
right AAATATTGGTCTATGTTTGTCACTGTTTCGTTGCAAGCCATTTCTTCCTNNNNNNNNNNNNNNNNNNNNNNNN
2222222222222222222222222222222222222222222222222NNNNNNNNNNNNNNNNNNNNNNNN
```

```
left -----
chrom TTCTTTTGAAGAGCCTGCCATTGGGCTTTACCATCTGCTGTCATCCTCT
right NNNNNNNNNNNNNNNNNNNNNNNNNNNNNNNNNNNNNNNNNNNNNNNNNNNNNNNNNNNNNNNNNNNNNNN
NNNNNNNNNNNNNNNNNNNNNNNNNNNNNNNNNNNNNNNNNNNNNNNNNNNNNNNNNNNNNNNNNNNNNN
```

Other Simple Repeat Low Complexity DNA LTR LINE SINE

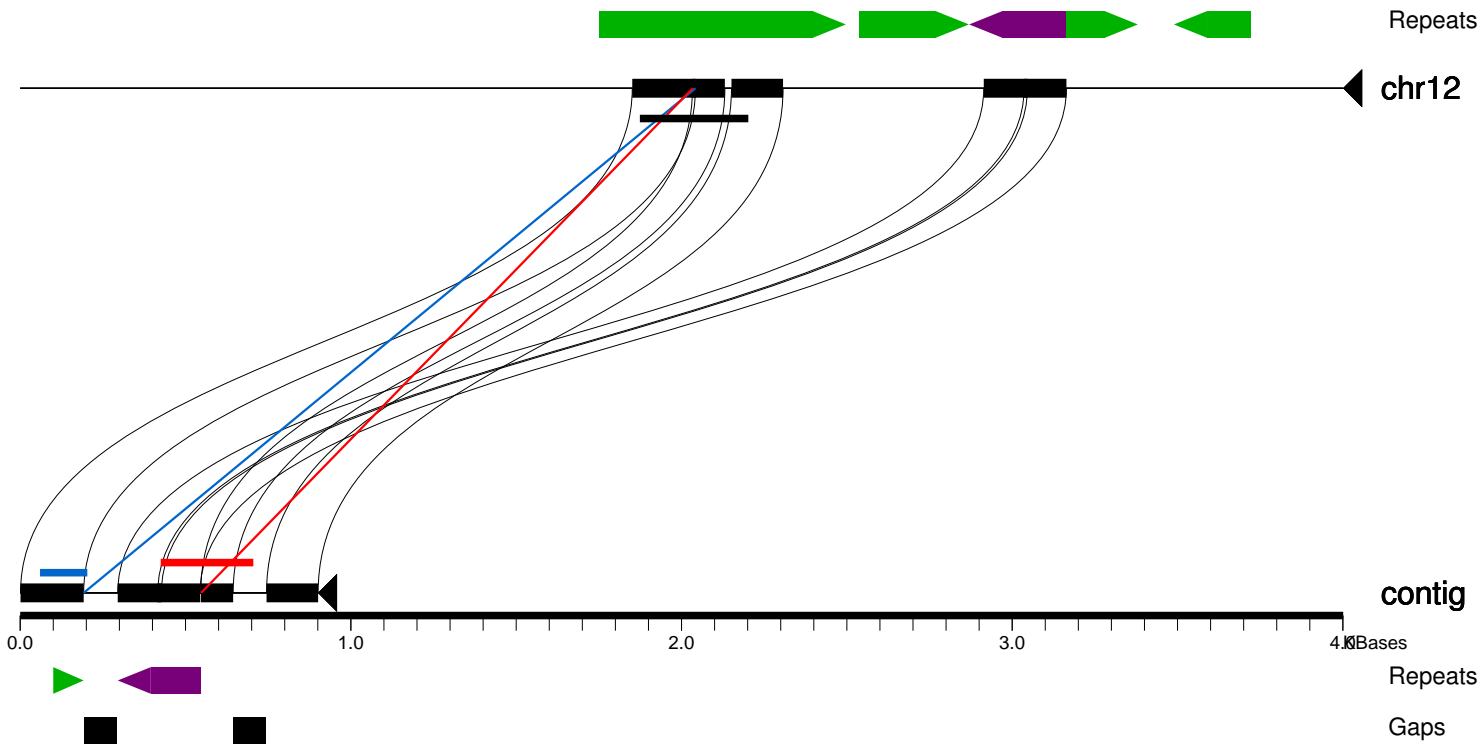





siteID: chr12\_45064348 Scafftig1 - Breakpoint: chr12:45064360

chr12:45064318-45064419

Overlap Length: 18 INS size: 304 Genotyped: Yes

```
left  TTAA-----AAAACAAGA-TGCAAGT---ACAAGAAACCTATTTTCATCTATAAAGATACACA
chrom TTAA-----AAAACAAGA-TGCAAGT---ACAAGAAACCTATTTTCATCTATAAAGATACACA
right GCACTCCAGCCTGGGCGACAGCGAGACTCCGTCTCAAAAAAAAAAAAAAAAAAAAAAAAAAAAAAA
11*11111111111111111111*1*1*1***1*1*111*111*1**1***111*1111*111*1*****
```

  

```
left  TAGACTAGGCCGGGCGCGGTGGCTCACGCCGTGTAATCCCAGCACTTTGGGAGGCCGAGGCGGGCAG
chrom TAGACTAAAAGAGAAGGGACGAAAAAA-----AATCCATGCAAAT---GAAAAC-----CAA
right TAGACTAAAAGAGAAGGGACGAAAAAA-----AATCCATGCAAAT---GAAAAC-----CAA
*****22222*22*2*22*2222*222222*****22***22*222**222*2222222**2
```

Other Simple Repeat Low Complexity DNA LTR LINE SINE

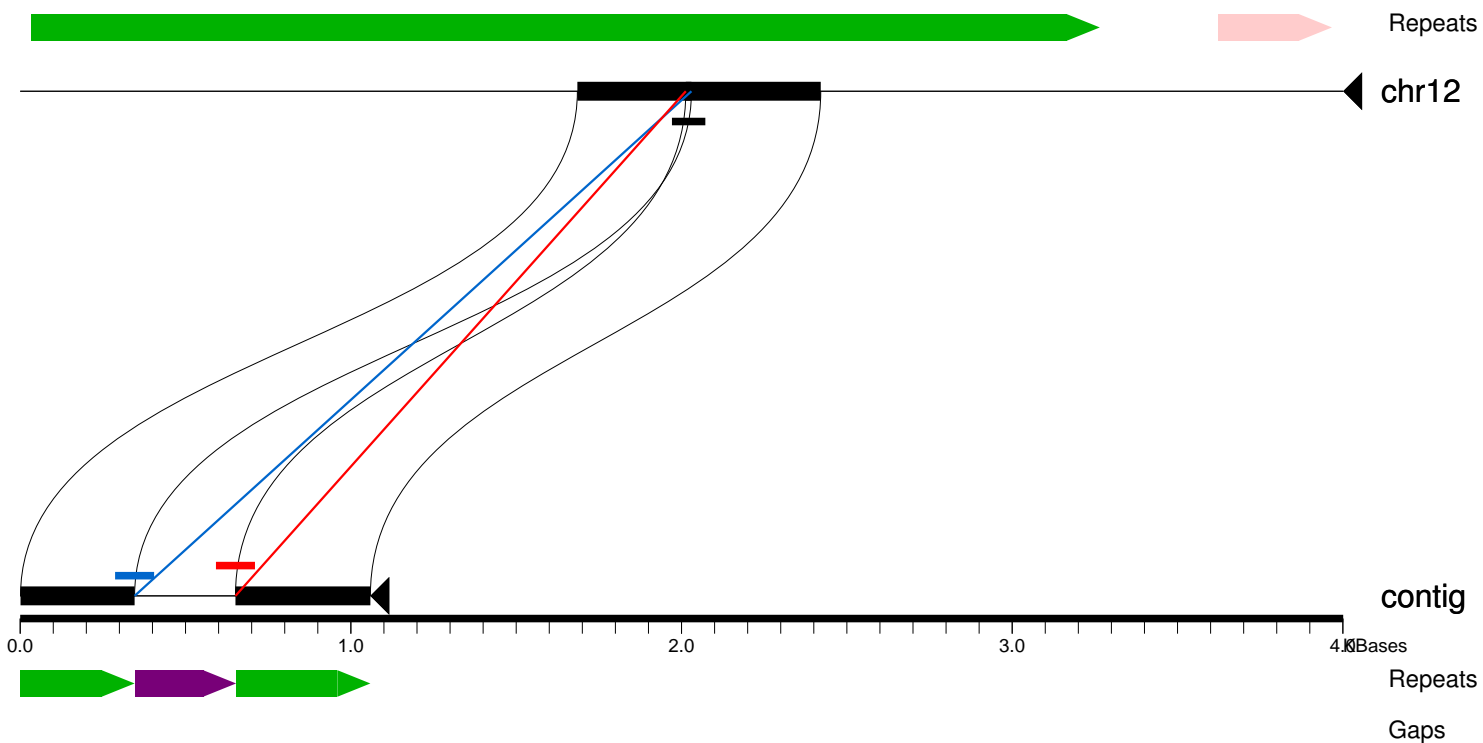



siteID: chr12\_45419542 Scafftig4 - Breakpoint: chr12:45419545

chr12:45419496-45419568

Overlap Length: 10 INS size: 324 Genotyped: Yes

```

left  TAATTATTT---ACTG-----AATAAACCAAGT
chrom TAATTATTT---ACTG-----AATAAACCAAGT
right CCGAGATCCCGCCACTGCACTCCAGCCTGGGCGACAGAGCGAGACTCCGTCTCAAAAAAAAAAAAAAAAAA
      11111**111111***11111111111111111111111111111111111111111111111111**1***1**11
    
```

```

left  AAATGAATGTCATAAGTACTAGAAATAGAAAAGATCTGGGCCGGGCGCGGTGGCTCACGCCTGTAATCCCAG
chrom AAATGAATGTCATAAGTACTAGAAATAGAAAAGATCTGGGCCGGGCGCGGTGGCTCACGCCTGTAATCCCAG
right AAAAAAAAAAAAAAAAAAAAAAAAAAAAAAGAAAAGATCT-----GCAAAGTG-----
      ***11**1111*1**11*11*1**1*****2222222**222***2222222222222222222
    
```

```

left  CACTTTGGGAGGCCGAGGCGGGCGG
chrom CACT-----GG
right CACT-----GG
      ***2222222222222222222**
    
```

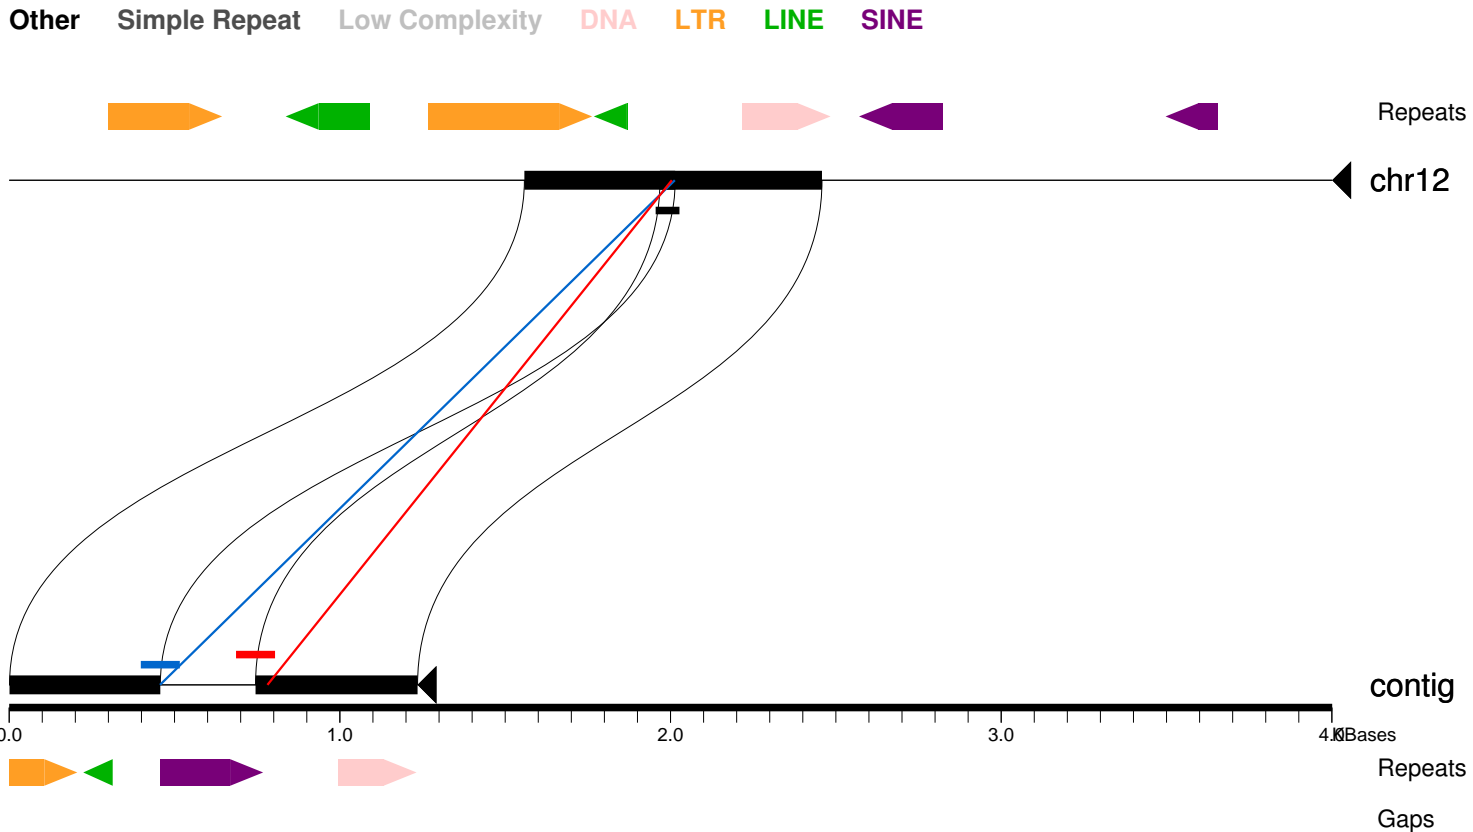

siteID: chr12\_4770879 Scaffitig4 - Breakpoint: chr12:4770875

chr12:4770826-4770934

Overlap Length: 11 INS size: 288 Genotyped: Yes

```
left  G--GACAGGAACAGTCGG---AAGAGTTG---ATACAGGG--GAAGCAGAATCAGTGCCTAGAGTTCTT
chrom G--GACAGGAACAGTCGG---AAGAGTTG---ATACAGGG--GAAGCAGAATCAGTGCCTAGAGTTCTT
right TCCGCCCCTCTCGGCCTCCCAAAGTGCTGGGATTACAGGCCTGAGCCACCGCGCCCGGCCTAGAGTTCTT
      111*1*1*111*1*1*11111***1*1**1111*****111**11**11111111*11*****
```

  

```
left  TTTTTTTTTGAGACGGAGTTTTTGCTCTGTGCGCCAGGCTGGAGCGCAGTGGCGCGATCT
chrom GAGAAGGTTGAGAAACAG-----GTATCCCAGGA-GCAGATGAACAAAGAACAAG
right GAGAAGGTTGAGAAACAG-----GTATCCCAGGA-GCAGATGAACAAAGAACAAG
      2222222*****222**222222222**22*****22*2**222*22222*222222
```

Other Simple Repeat Low Complexity DNA LTR LINE SINE

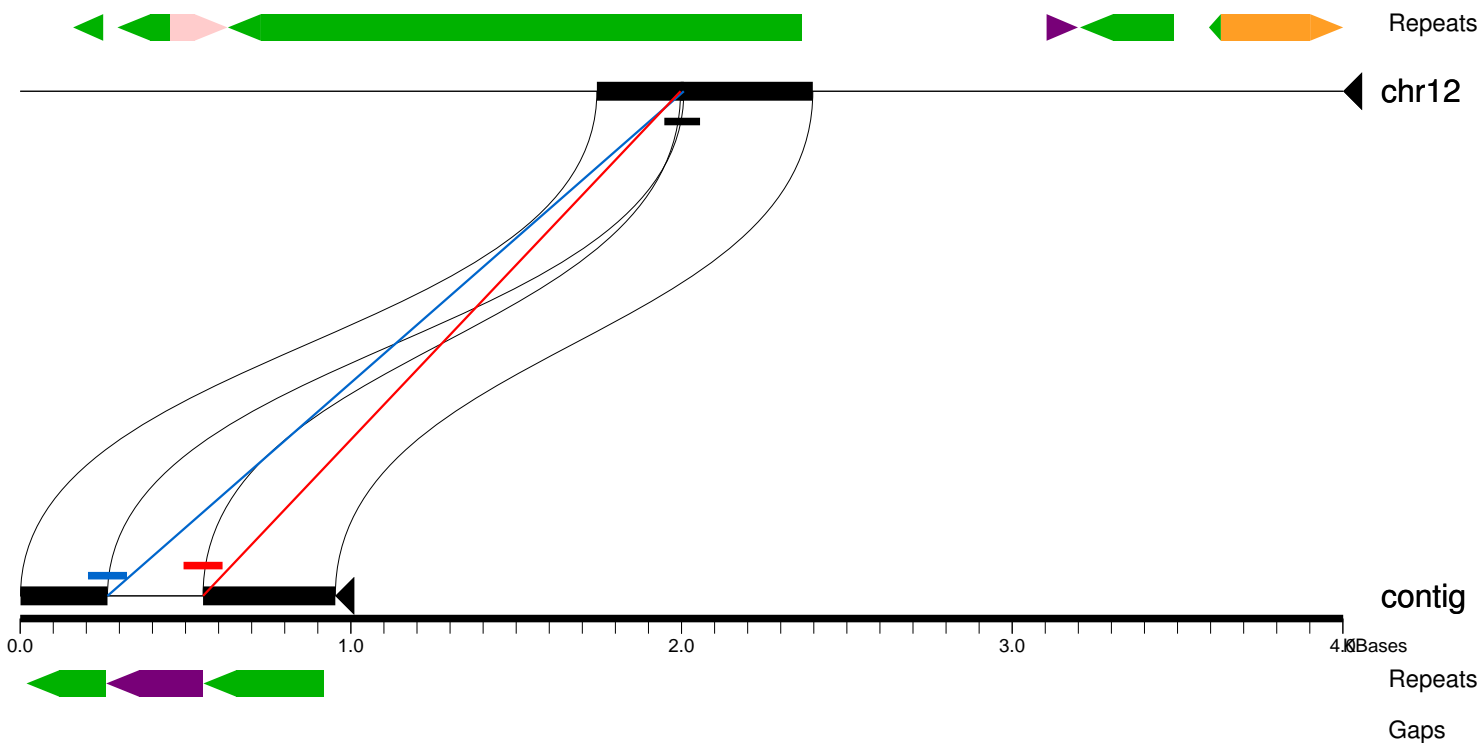

siteID: chr12\_48312497 Scafftig1 - Breakpoint: chr12:48312476

chr12:48312431-48312535

Overlap Length: 15 INS size: 289 Genotyped: Yes

```
left  CTAT-GAAACAAAG-AGATCAGACAAACC--CAAGTCGAAGGACATTCT-----AAAAAATACCT
chrom CTAT-GAAACAAAG-AGATCAGACAAACC--CAAGTCGAAGGACATTCT-----AAAAAATACCT
right AGATCGCGCCACTGCACTCCAGCCTGGGCGACAGAGCGAGACTCCGTCTCAAAAAAAAAA AAAAAATACCT
      11**1*111**11*1*111***1*1111*11**111***1111*11***11111111111*****
```

  

```
left  GACCGGCCGGGCGCGGTGGCTCACGCCTGT-AATCCCAGCACTTTGGGAGGCCGAGGCGGGCGG
chrom GACCAGTC---CTC-----CTCAAAACTGTCAAGATCATCA-----AAAAGTTGGGAAGTTT
right GACCAGTC---CTC-----CTCAAAACTGTCAAGATCATCA-----AAAAGTTGGGAAGTTT
      ***2*2*222*2*22222***222***2**222**2**2222222*222*22**222*222
```

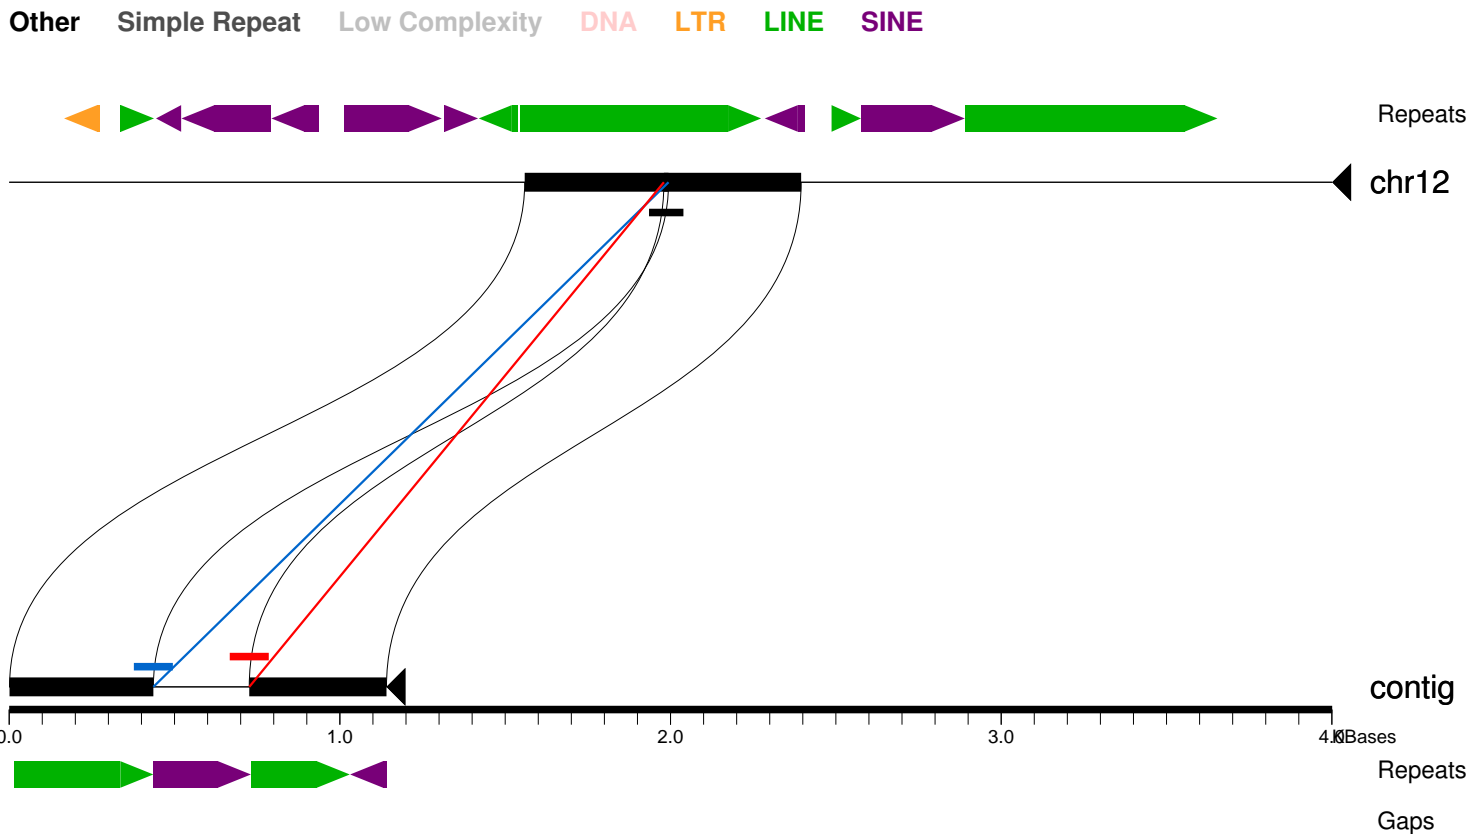

siteID: chr12\_52813699 Scaffitig3 - Breakpoint: chr12:52813681

chr12:52813636-52813740

Overlap Length: 15 INS size: 297 Genotyped: Yes

```
left  A-GCCATA--TGACCTCTCAGAG-----GAT-----CTTTCTCTACTATGTAATGGAAAGTTGTCATT
chrom A-GCCATA--TGACCTCTCAGAG-----GAT-----CTTTCTCTACTATGTAATGGAAAGTTGTCATT
right CCGCCCGCCTCGGCCTCCCAAAGTGCTGGGATTACAGGCGTGAGCCACCGCGCCC-GGCCAGTTGTCATT
      11***111111*1****1**1**111111***111111*1*111*1**111*1111**11*****

left  TTTTFTTTTTTTTTTTTTTTTTTTTGGAGACGGAGTCTCGCTGTCGCCCAGG-CTGGAGTGCAGT-GGCGC
chrom CTTTTA-----AAACCACAGAGTCCC---ATCACACATGACTTACATGAAGCAGGATC
right CTTTTA-----AAACCACAGAGTCCC---ATCACACATGACTTACATGAAGCAGGATC
      2***2222222222222222222222222222**2*****2*2222**2*2**2*2**2222**2**22**22*
```

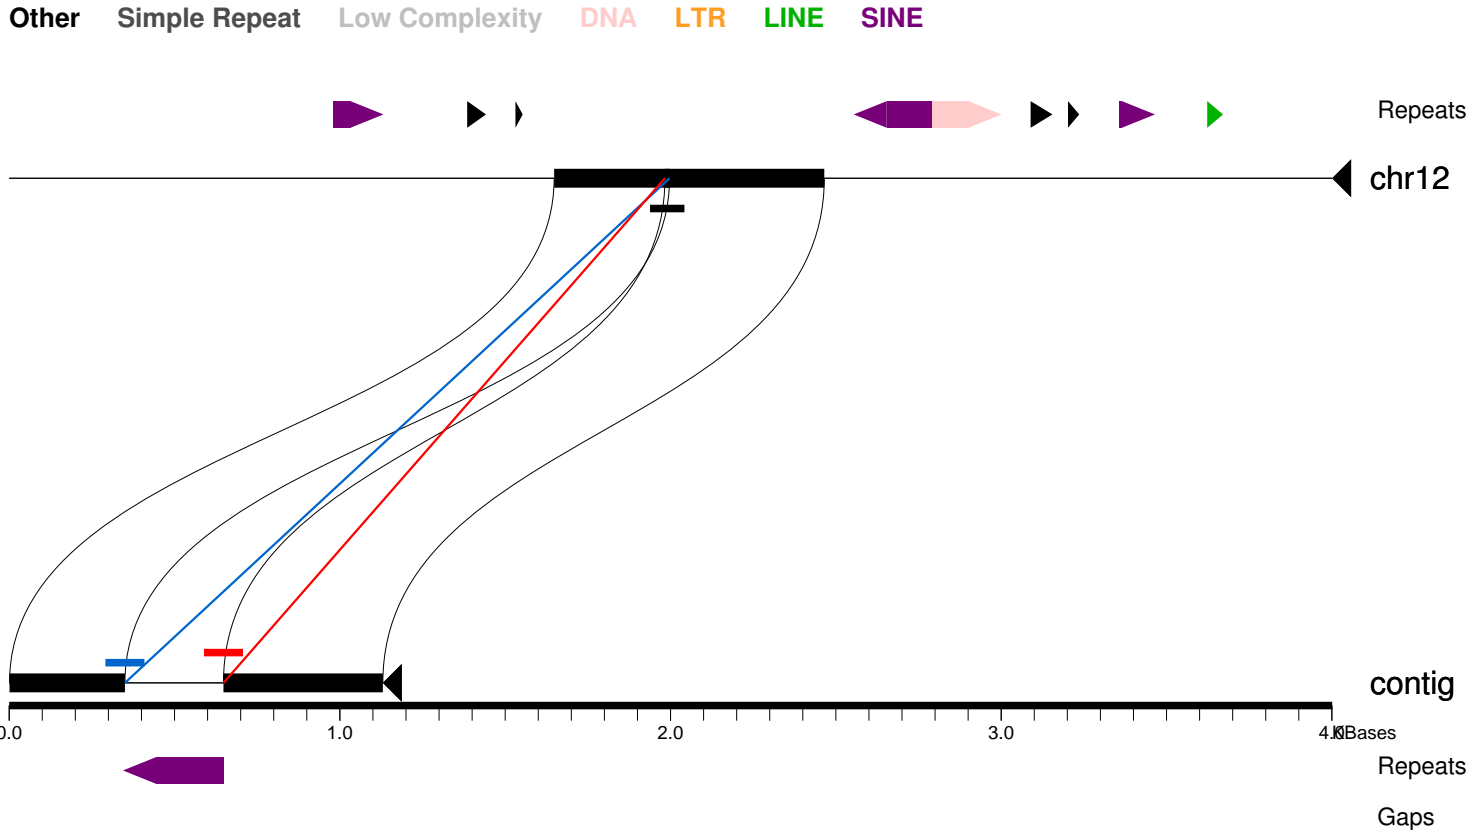

siteID: chr12\_5769605 Scaffitig7 - Breakpoint: chr12:5769595

chr12:5769543-5769654

Overlap Length: 8 INS size: 290 Genotyped: Yes

```
left  CAATCTTTTGTGTACTCCATCTCAGCCACACTGGCTTCCTTCCTTTTCTTAG-----AACACGCG-
chrom CAATCTTTTGTATACTCCATCTCAGCCACACTGGCTTCCTTCCTGTTCTTAG-----AACACGCCAA
right AGCACTCCTGCCTGGGCGA-CAGAACGAGACTCCGTCTCAAAAAAAAAAAAAAAAAAAAAAAACACGCCAA
      1111**11**1N*111*1*1*11*1*1*1***111*11*11111N11111*1111111111*****22
```

```
left  GCCGGGCGCGGTGGCTCACGCCTGTAATCCCAGCACTTTGGGAGGCCGAGGCGGGCGG
chrom GCCGGCTTCCATAGCAAAACCTTAGCATGACTCCTCT-----CCTCACTCTCCAC
right GCTGGCTTCCATAGCAAAACCTTAGCATGACTCCTCT-----CCTCACTCTCCAC
      **1**222*22*2**22*22*2*222**22*22*2**22222222**22222222*22
```

Other Simple Repeat Low Complexity DNA LTR LINE SINE

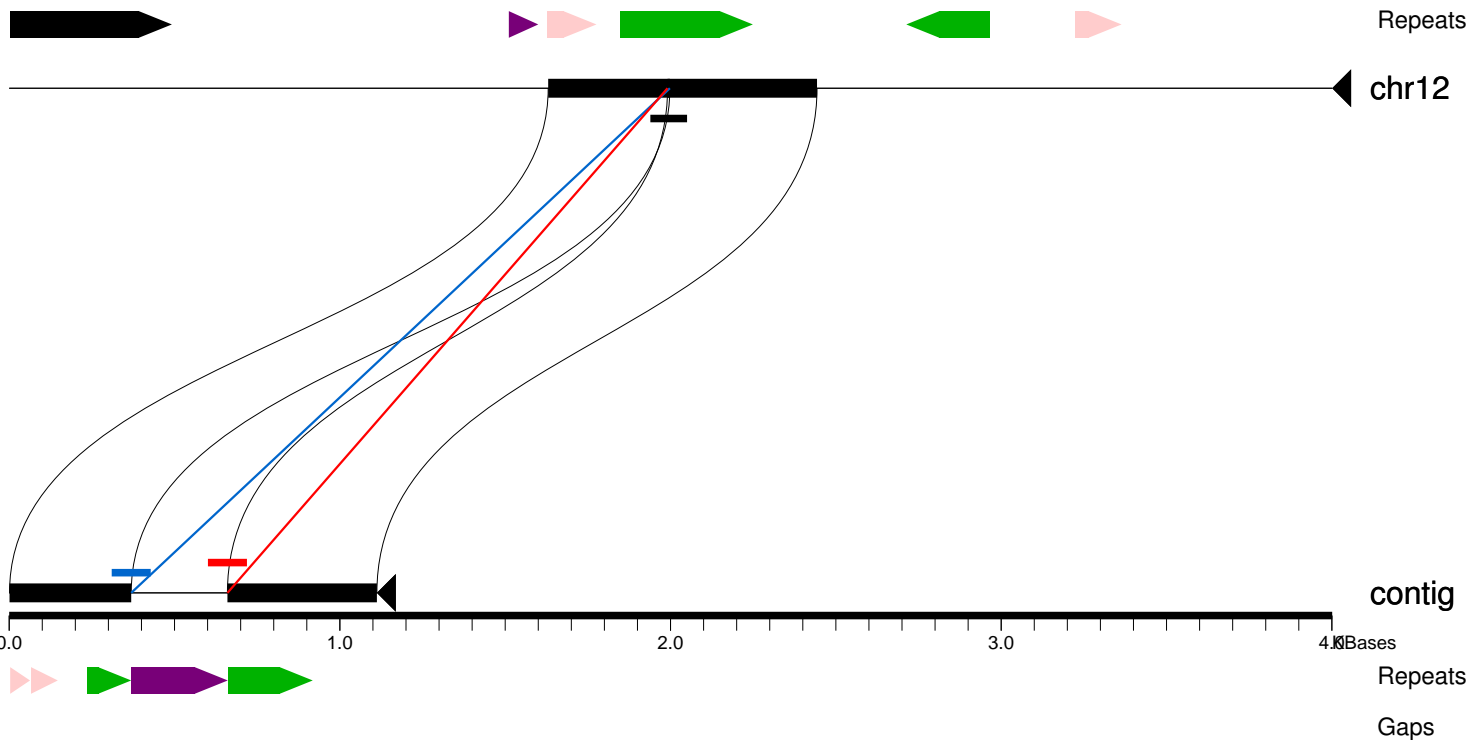



siteID: chr12\_58359077 Scaffig1 - Breakpoint: chr12:58359058

chr12:58359012-58359117

Overlap Length: 14 INS size: 316 Genotyped: Yes

```
left  CTCAAAGACC-----ACACGATCCAGCCATCTCACTCTTAAGTATATCCCCAAAAGAAAGGA
chrom CTCAAAGACC-----ACACGATCCAGCCATCTCACTCTTAAGTATATCCCCAAAAGAAAGGA
right GCGACAGAGCGAAACTCCGCCTCAAAAAAAAAAAAAAAAAAAAAAAAAAAAAAAAAAAAAAAA
111*1***1*111111111111111*1*11*111*111*1111*11111*11111*11*1*11111*****
```

```
left  AATGGCCGGGCGCGGTGGCTCACGCCTGTAATCCAGCACTTTGGGAGGCCGAGGCGGGCGG
chrom AATGGCCGGGCGCGGTGGCTCACGCCTGTAATCCAGCACTTTGGGAGGCCGAGGCGGGCGG
right AATTAGTATATCAAGTG----ATATCTGTACGCTCACATTTATTGTAGCACTA-----
**22222222222222222222*222*****22*2**2222*2*2*2**22*2*2222222222
```

Other Simple Repeat Low Complexity DNA LTR LINE SINE

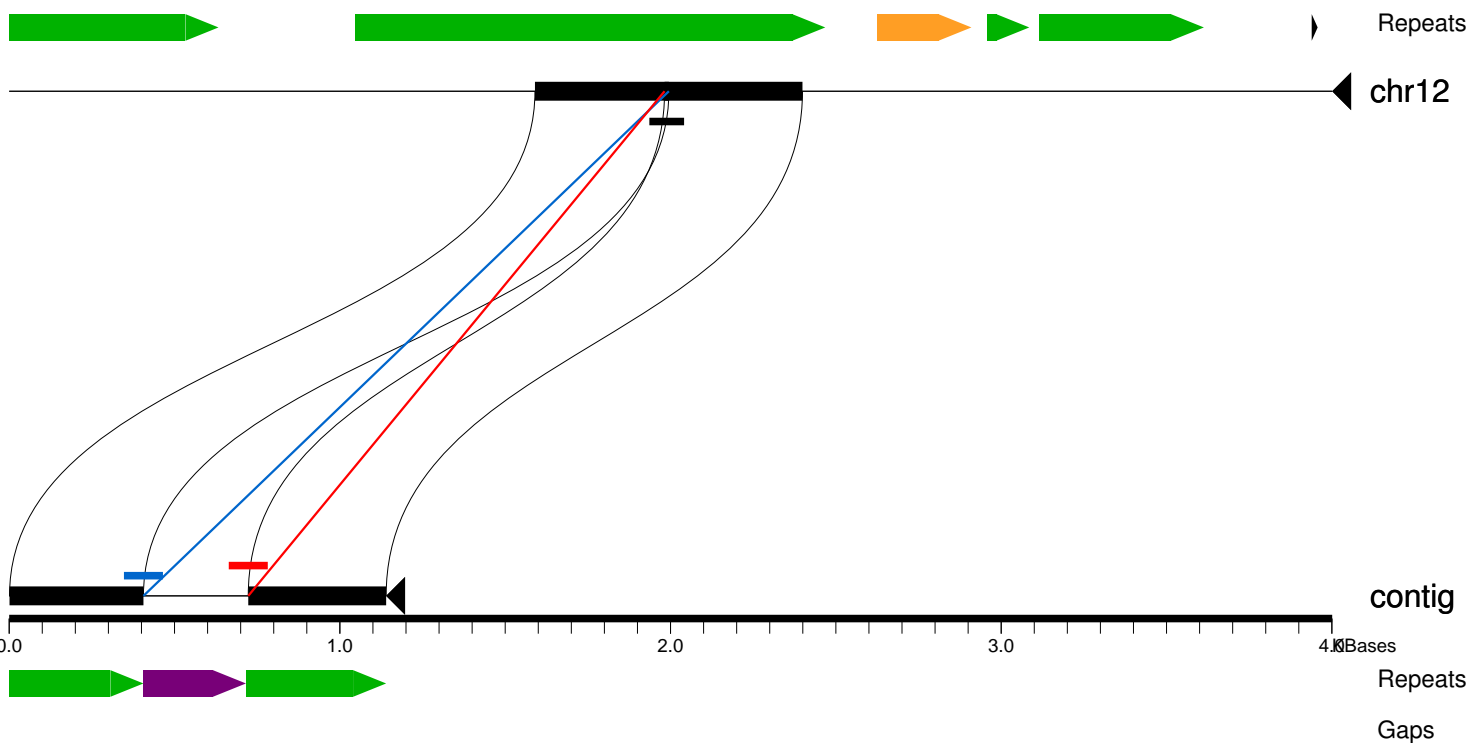

siteID: chr12\_58458213 Scaffitig12 - Breakpoint: chr12:58458207

chr12:58458164-58458263

Overlap Length: 17 INS size: 298 Genotyped: Yes

```
left  CTG-----GAAATCTAGTTTT--CGAAAGTTGAACACTGTGT-----AATTC AATAAAAAATAT
chrom CTG-----GAAATCTAGTTTT--CGAAAGTTGAACACTGTGT-----AATTC AATAAAAAATAT
right CCGCCACTGCACTCCAGCCTGGGCGACAGAGCGAGACTCCGTCTCAAAAAAAAAAAAAAAAAAAAAA AAAAAATAT
      *1*11111*1*1**1**11*111***1**1111*1***11**111111111111**111**1*****
```

  

```
left  TCTAATGAGGGCCGGGCGCGGTGGCTCACGCCTGTAATCCCAGCACTTTGGGAGGCCGAGGCGGGCGG
chrom TCTAATGAG AATAAAAA-GCTA-GACAGAGGCA--TAAT---AATGCTTTT-----CCTAAT-----
right TCTAATGAGAATAAAAA-GCTA-GACAGAGGCA--TAAT---AATGCTTTT-----CCTAAT-----
      *****22222222**222*2*22*2**222*****222*222*****222222**2*222222222
```

Other Simple Repeat Low Complexity DNA LTR LINE SINE

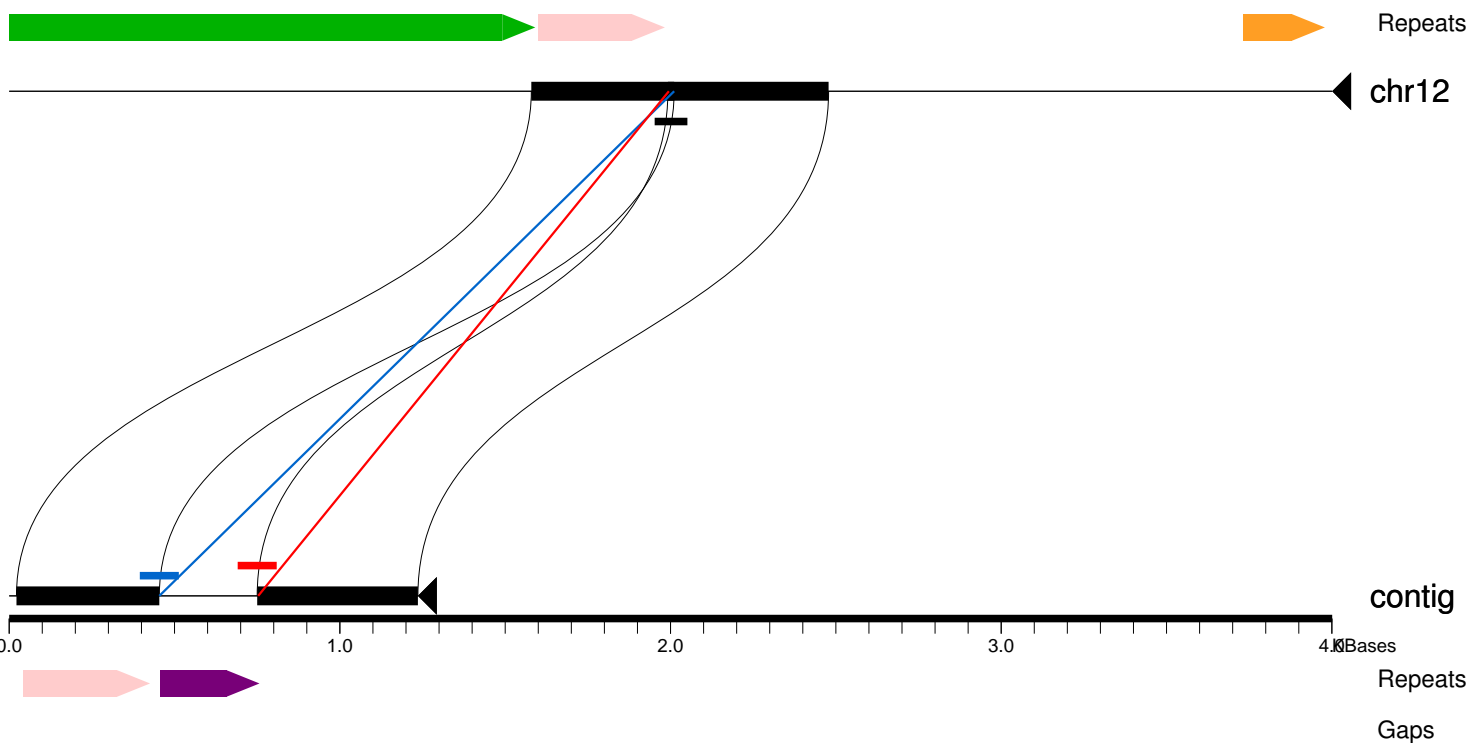

siteID: chr12\_59219040 Scaffitig1 - Breakpoint: chr12:59219048

chr12:59219003-59219104

Overlap Length: 15 INS size: 305 Genotyped: Yes

```
left  GATAAT-----GGTCTAAATACCTAAAAA--GTAG-AATTTTAAACATTGAATAAGAAAGG
chrom GATAAT-----GGTCTAAATACCTAAAAA--GTAG-AATTTTAAACATTGAATAAGAAAGG
right TGCAGTCCGCAGTCCGGCCTGGGCAACAGAGCGAGACTCCGTCTCAAAAAAAAAAAAAAAAAAAAGAAAGG
      111*1*11111111111111111111**1*1*1*1*1*1*1*1*1111**111**11111**1*111**1*****
```

  

```
left  AAGGCCCGGCCGGGCGCGGTGGCTCACGCCTGTAATCCCAGCACTTTGGGAGGCCGAGGCGGGTGG
chrom AAGGCCCTACAACA-----TGCCACTTACAAGGAA-CTCAC--CTTAAGTATAAAGA-----
right AAGGCCCTACAACA-----TGCCACTTACAAGGAA-CTCAC--CTTAAGTATAAAGA-----
      *****22*222222222**2*2*222*22*2**2*2**222***22*2*222**222222222
```

Other Simple Repeat Low Complexity DNA LTR LINE SINE

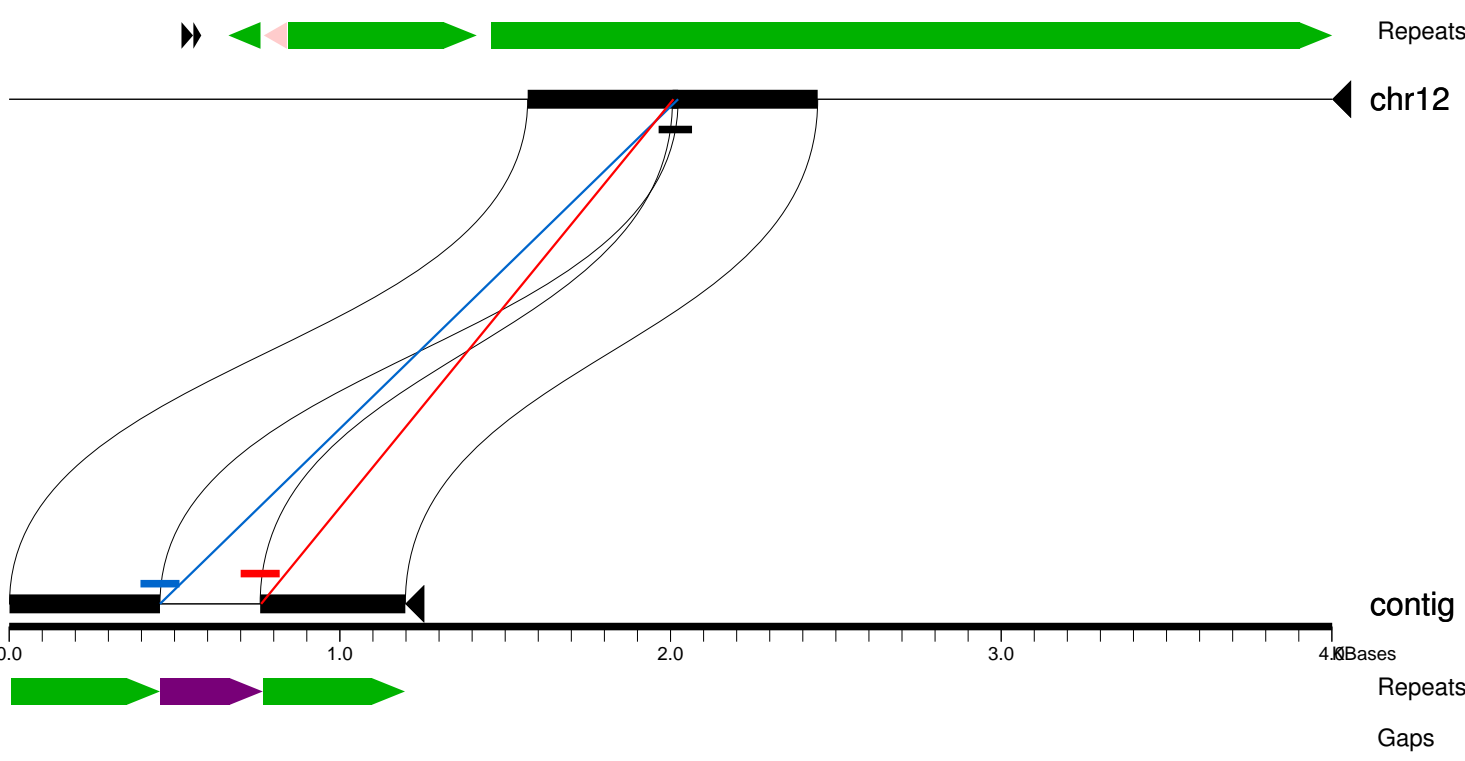

siteID: chr12\_59381471 Scaffoldig1 - Breakpoint: chr12:59381457  
 chr12:59381409-59381516  
 Overlap Length: 12 INS size: 417 Genotyped: No

```

left  ATCTCATTATTGGATATACACCCAAAGGAATAT-----AAATTGTTCTACTATAAAAAACACATG
chrom ATCTCATTATTGGATATACACCCAACGGAATAT-----AAATTGTTCTACTATAAAAAACACATG
right NNNNNNNNNNNNNNNNNNNNNNNNNNNNNNNNNNNNNNNNNNNNNNNNNNNNNNNNNNNNNNNNNNN
11111111111111111111111111111111111111111111111111111111111111111111111
*11*1******

left  CGGCCGGGCGCGGTGGCTCACGCCTGTAATCC---CAGCACT-TTGGGAGG--CCGAGGCG-GGTGG
chrom C-----ACGCTTATATTCATTGCAGCACTATTCATAATATCAAAGACGTGGAAT
right C-----ACGCTTATATTCATTGCAGCACTATTCATAATATCAAAGACGTGGAAT
*222222222222222222222222222222222222222222222222222222222222222222222222
  
```

Other Simple Repeat Low Complexity DNA LTR LINE SINE

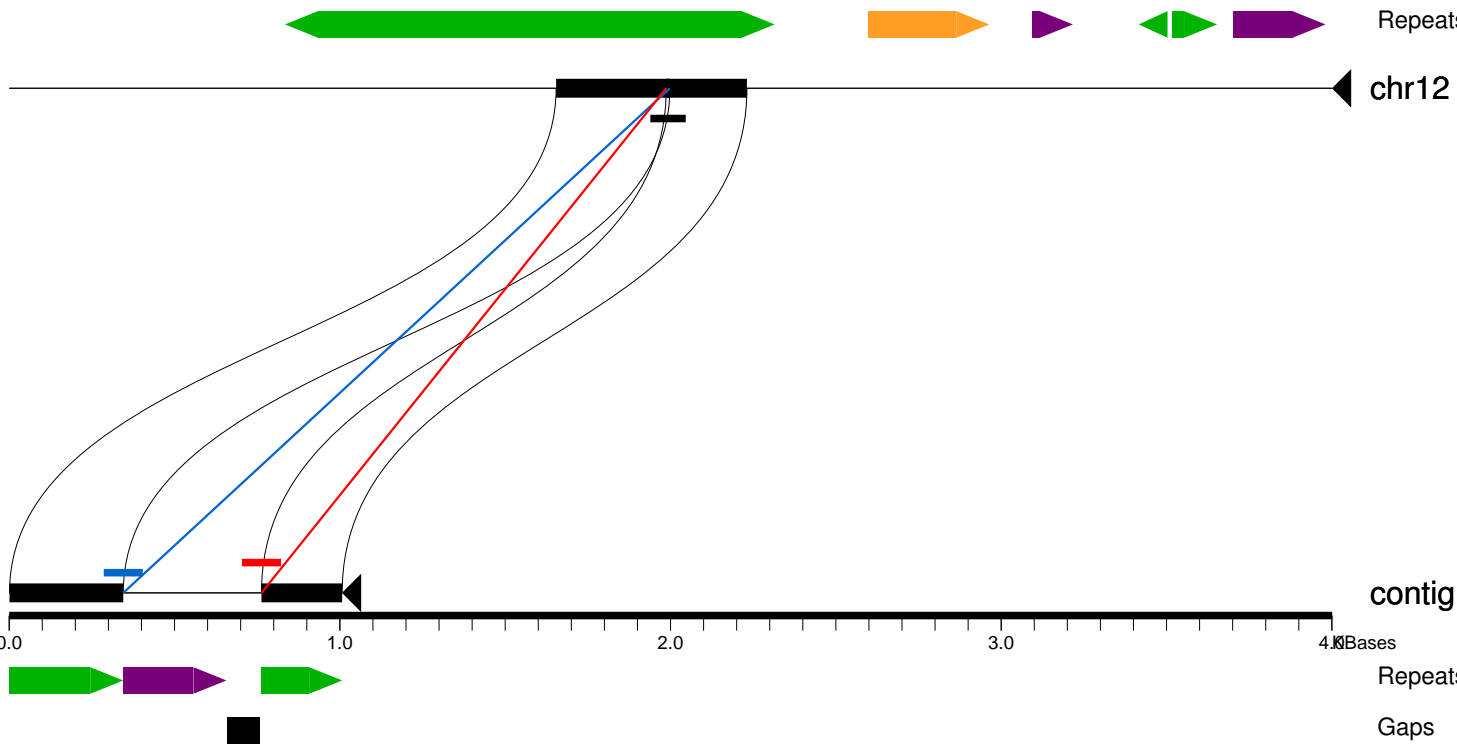

siteID: chr12\_59491907 Scafftig7 + Breakpoint: chr12:59491937

chr12:59491777-59492098

Overlap Length: 0 INS size: 332 Genotyped: Yes

```
left  -GGGAAGTAGTTCTTAGAGACAAGGAGAGAATTGTTGAAACTGGTAGAACTGGCTCTGACTCCTCAATCT
chrom CGGGAAGTAGTTCTTAGAGACAAGGAGAGAATTGTTGAAACTGGTAGAACTGGCTCTGACTCCTCAATCT
right -----AGA---ATGGCGTGAACCCGGGA----GGCGGAGCTTGCAGTGAG-CCGAGATCG
      11111111111111111111***111*1**1*1***111111**1111**11**1**1**11***11**111***1
```

```
left  TGACTCCACATCCTATTCTTTTATGACTAAAATGTCATTCATGTCTTTCTTTGGTTAAGACTGGCATC
chrom TGACTCCACATCCTATTCTTTTATGACTAAAATGTCATTCATGTCTTTCTTTGGTTAAGACTGGCATC
right CGCCACTGCACTCCAGCCTGG---GCGACAGAGCGAGACTCCGTCTCAAAAAAAAAAAAAAAAAAAAAAA
      1*1*1*11**11*1*11**111111*1***11*11111111*1*1*1**111111111111**1*11111*11
```

```
left  CCCATAGAAAAGAGCTGAGTGGGGCCGGGCGG-----GTGGCTCACGCCTGTAATCCCA---GCACTTT
chrom CCCATAGAAAAGAGCTGAGTGGCCATTGTCTAGAATACAGTGCCCTAGGTCAGAGGTCTGAAATGCTTTTT
right AAAAAAAAAAAAAAAAAAAAAAAAAAACCATTCTCTAGAATACAGTGCCCTAGGTCAGAGGTCTGAAATGCTTTTT
      111*1*1***1*1111*111112222212*22*222222***2*22*2*2*2*222**22*222**22***
```

```
left  GG---GAGGCCGA--GGCGGGCGGATCACGAGGTCAGGAGATCGA----GACCATCC--TGGC--TAACA
chrom GAAGAGAAGCAGAAATGGTTGG--GGAACA--GAAGTCTCAAAAATGCCCTGGCTGATGAATTGGCAGTGAAA
right GAAGAGAAGCAGAAATGGTTGG--GGAACA--GAAGTCTCAAAAATGCCCTGGCTGATGAATTGGCAGTGAAA
      *2222**2**2**22**22**2***2**2**2***222*2**2*22222*222**2222****22*2*2*
```

```
left  CGGTGA-----AACCCCGTCTCTACTA-----AA
chrom AGGTGTTTACAGCCAGGGAAGGCCATCAGTATGGTGTGGGGGAA
right AGGTGTTTACAGCCAGGGAAGGCCATCAG-----
      2***22222222222222**22*2**2211NNN      11
```

Other Simple Repeat Low Complexity DNA LTR LINE SINE

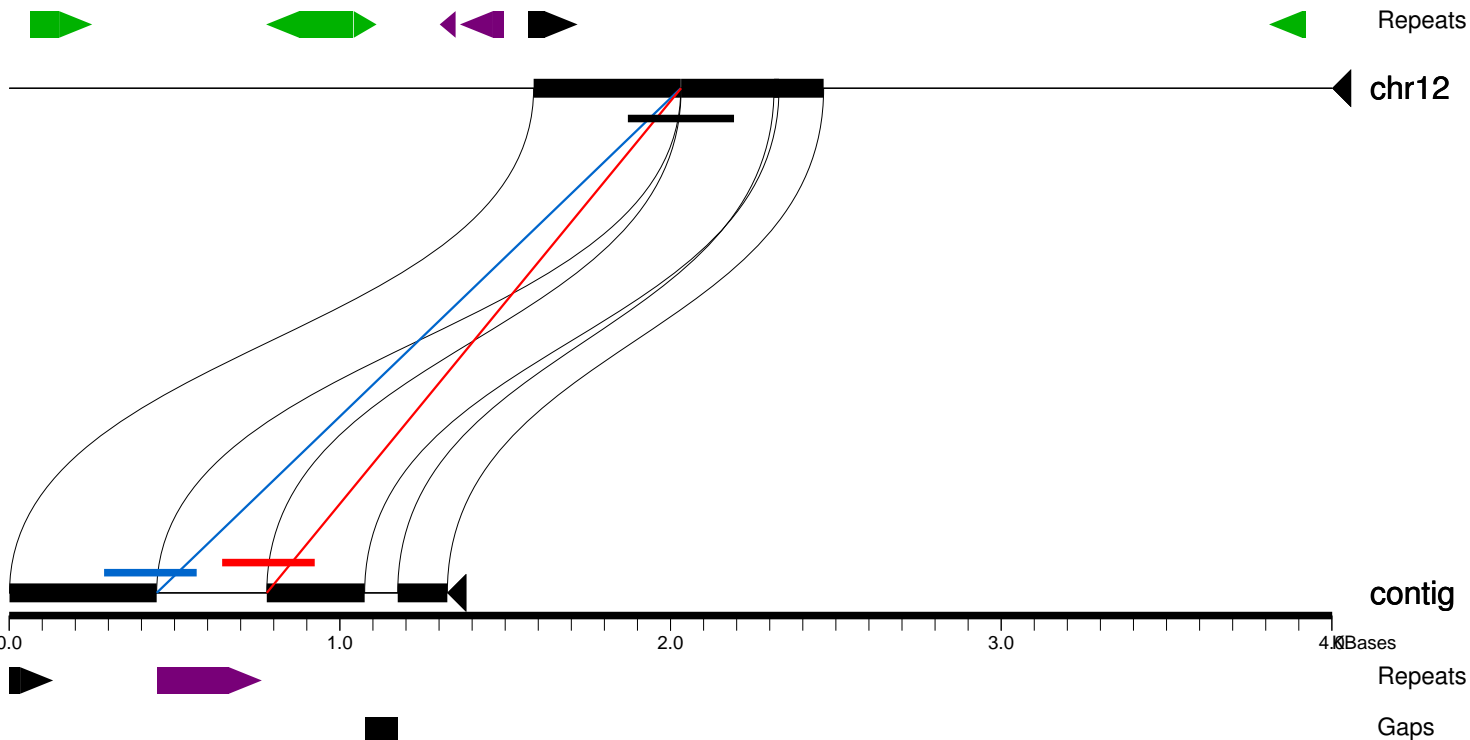



siteID: chr12\_6066791 Scaffitg2 + Breakpoint: chr12:6066792  
 chr12:6066632-6066963  
 Overlap Length: 12 INS size: 299 Genotyped: Yes

```

left  C-----TCAAGCTTCTGAAAACTAAAGAAAAACTGTTAAAGCATCCAATAGAAGGGGGGAAAT
chrom CAAAAGCATATACTCAAGCTTCTGAAAACTAAAGAAAAACTGTTAAAGCATCCAATAGAAGGGGGGAAAT
right -AATGGCGTGAAC-----CTGGGAGGCGGAG-----CTTGCAGTG-AGCCAAGATT---GTGCCACT
      122NN22N2NN22111111111***11*11111**11111**111*11*1*1****1*11111*1*11*1*

left  GCATACAGGAAAAACAACAATAAAAAATGGCGGCTGACTGGTCATCAGAAATAACACAAGCCAAAAGACTAAG
chrom GCATACAGGAAAAACAACAATAAAAAATGGCGGCTGACTGGTCATCAGAAATAACACAAGCCAAAAGACTAAG
right GCAATCCGGC---CTGGGCTAAAAGA--GCGG--GACTCCGTCTCAAAAAAAAAAAAAAAAA---AAAGA-----
      ***11*1**1111*11111*****1*11****11****11111***1***1**1*1**111*****11111

left  AAACATACTTAAAGTGATGAAATTTAAAAACAGGCTGGGCGCGGTGG----CTCACGCCTGTAATCCCAG
chrom AAACATACTTAAAGTGATGAATTTAAAAACAAACCCGTCAACCTAGAATTCTATATTCAGTAAATGAAG
right -----AATTTAAAAACAACCCCGTCAACCTAGAATTCTATATTCAGTAAATGAAG
      111111111111111111111111111111111*****22*22*2*2222*2*2222*2*2222*2*****2222**

left  -----CACTTTGGGAGG-----CCGAGCGGGCGGA-TCA-CAAGGTCAGGAGATCGAGA
chrom GCAGAATAGAGACATTTTCAGATAAATGAAATCTTAGAAATGTGTTGTCATCCAGCCCTGCACTAAAAAGA
right GCAGAATAGAGACATTTTCAGATAAATGAAATCTTAGAAATGTGTTGTCATCCAGCCCTGCACTAAAAAGA
      222222222222**2***22*2222222222*22*2222*2*222***2*2**22*2*2*22222***

left  CCATCTT--GGCTAACACGG-----TGAAACCCGTCTCTACTAAA--
chrom AGTTCTTTAGGCTGA-AGGGAAATGATATAATATGGAAATTCAGATATA-TAAG--
right AGTTCTTTAGGCTGA-AGGGAAATGATATAATATGGAAATTCAGATATA-TAAGAA
      222***22***2*2*2**222222222222**2**222*222*2**2***211
  
```

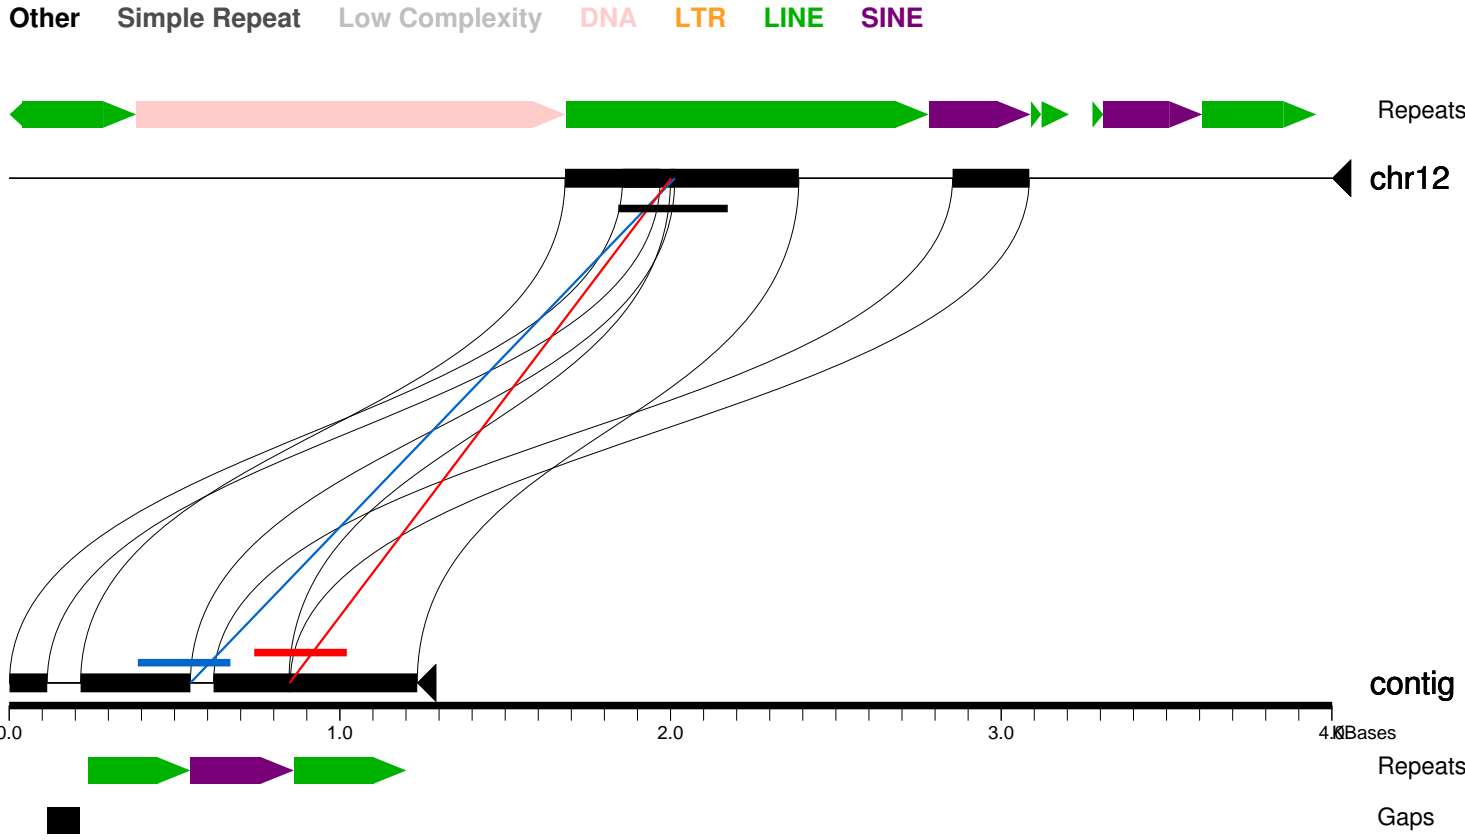







siteID: chr12\_61537961 Scaffig7 + Breakpoint: chr12:61537939

chr12:61537894-61537998

Overlap Length: 15 INS size: 184 Genotyped: Yes

```
left  ATTTACATTTTCATTT----AAAGTA-----TAAACTCTAGAATGAC---ACAAACTATGTCTCAGATT
chrom ATTTACATTTTCATTT----AAAGTA-----TAAACTCTAGAATGAC---ACAAACTATGTCTCAGATT
right CCACCCGCCTCGGCCTCCCAAAGTGCTGGGATTACAGGCGTGAGCCACCGCGCCCGGCCCTGTCTCAGATT
      111111*1111*1111111111*****1111111111**1*11*11**111**1111*1111111******
```

```
left  TCTTTTTTTTTTTTTTTTTTTTTTTTTTTTTTTTGGAGACGGAGTCTCGCTCTGTCACCCAGGCCGGAG
chrom TCTTAGGGGTTTCAATTATTCTTGGTAT-----AATAT---TATTTGA---ATTTATGTA
right TCTTAGGGGTTTCAATTATTCTTGGTAT-----AATAT---TATTTGA---ATTTATGTA
      ***22222***222**2**2**22*2*22222222*2*2*222*2*2*2*222*22222*22
```

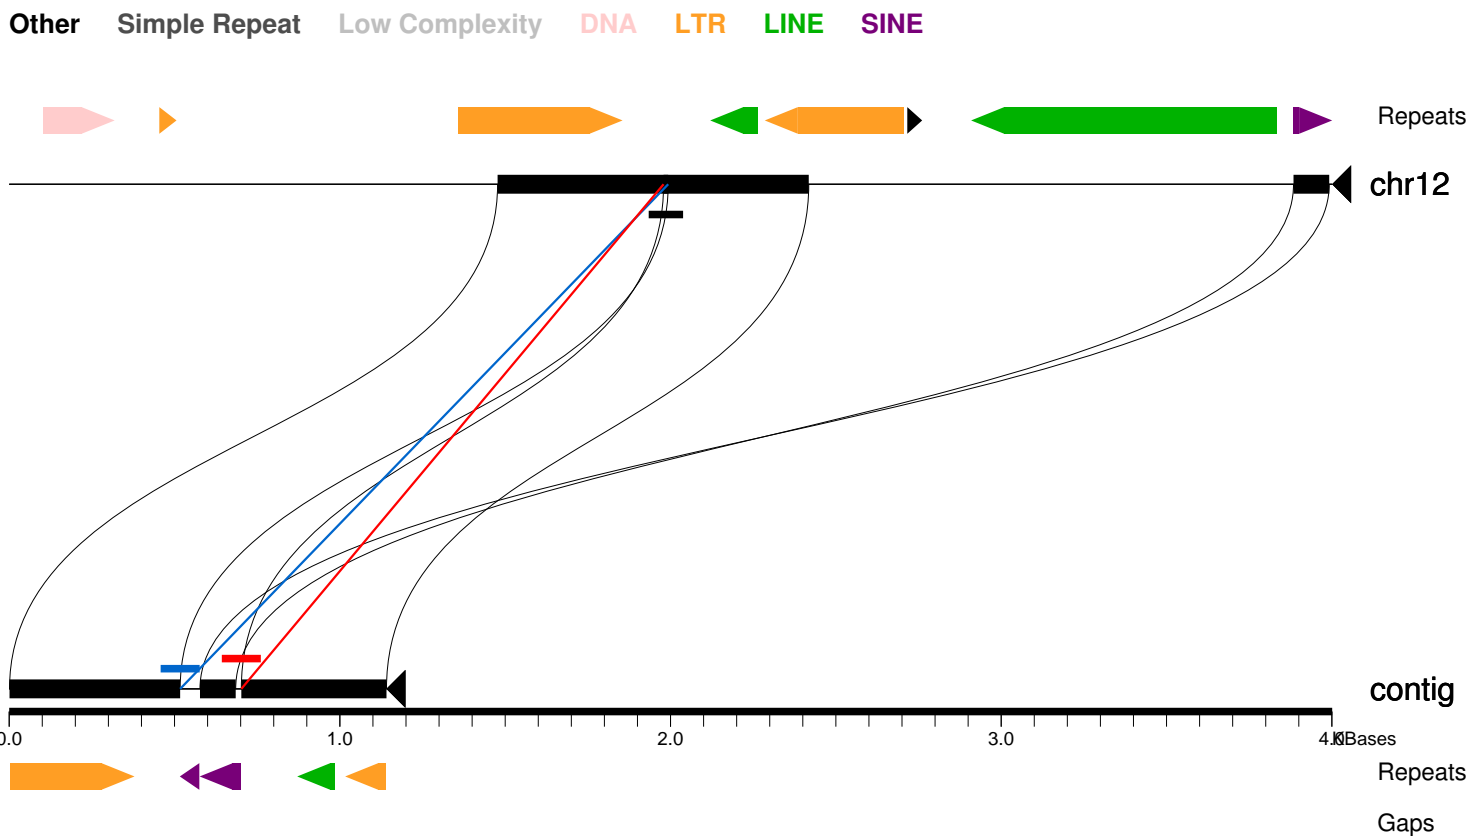

siteID: chr12\_61704152 Scafftig2 - Breakpoint: chr12:61704136

chr12:61704088-61704195

Overlap Length: 12 INS size: 292 Genotyped: Yes

```
left      T-----CAAAGGAAAACAC-----AAAAAGCATGCTTTCCTTCTTTTATTTTGATTAAAAATTTT
chrom     T-----CAAAGGAAAACAC-----AAAAAGCATGCTTTCCTTCTTTTATTTTGATTAAAAATTTT
right     ATTGCGCCACTGCCTCCAGCCTGGGCGACAGAGCGAGACT-CCGTCTCAAAAAAAAAAAAAA-AAAAAATTTT
          111111*1*11*1*111**1111111111*1*1***11*11*1**1***1111*11111*11*****
```

```
left      CTCGGCCGGGCGCGGTGGCTCACGCCTGTAATCCCAGCACTTTGGGAGGCCGAGGCGGGCGG
chrom     CTC AAT-GAAAAATTTTCATTACG--TGTATCTTGAACAAAAAAGTATTTCAA-----
right     CTC AAT-GAAAAATTTTCATTACG--TGTATCTTGAACAAAAAAGTATTTCAA-----
          **2222*2222222*222*2***22***22222*2**22222*2*222*2*22222222
```

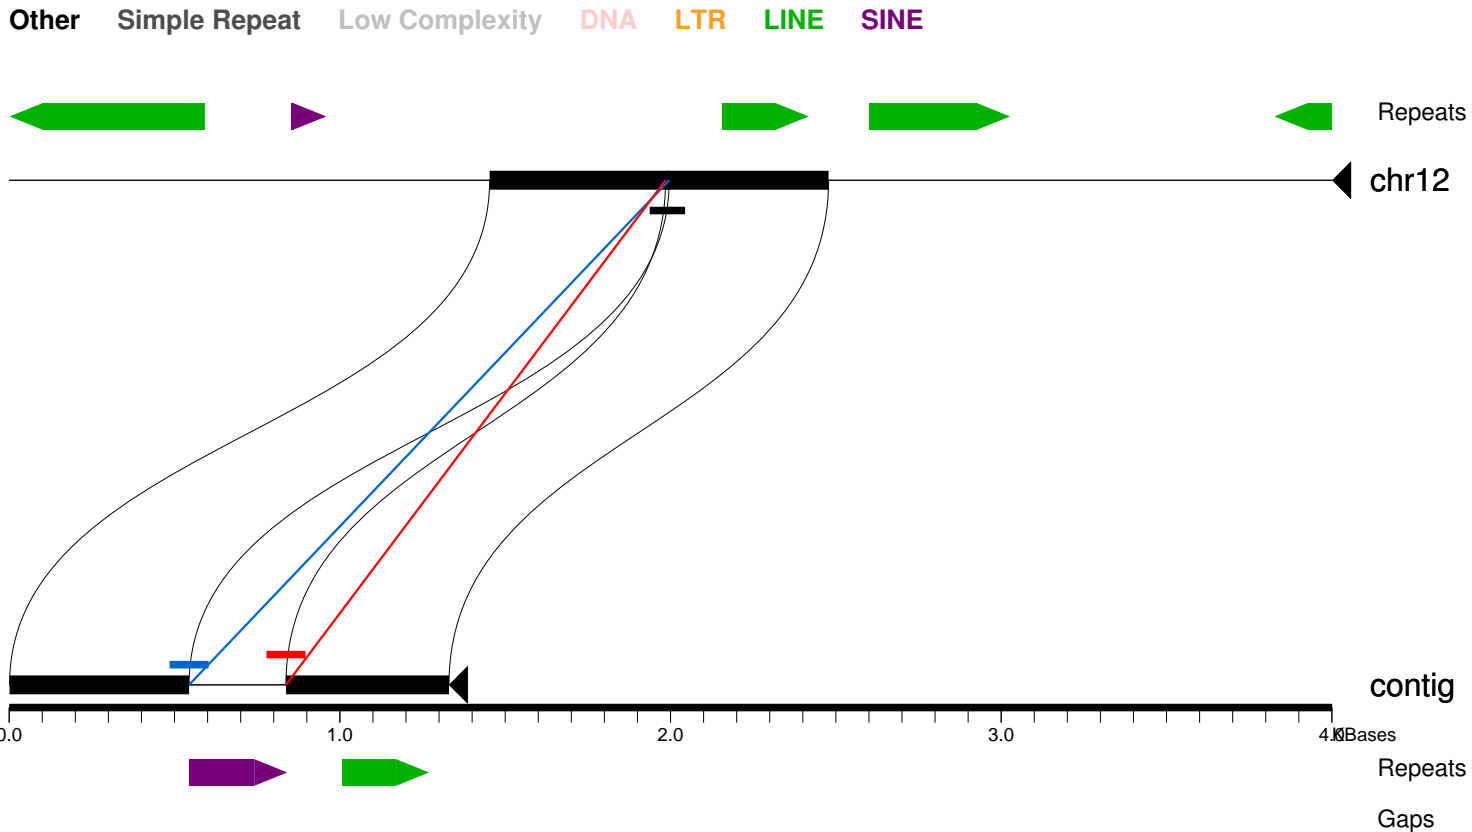

siteID: chr12\_61838503 Scafftig5 - Breakpoint: chr12:61838506

chr12:61838451-61838565

Overlap Length: 5 INS size: 310 Genotyped: Yes

```
left   TCACCAGCATTTAAAATTACCTTCTGTTTATTTCTTAGGACTCTGACATGACAATA----AATT  
chrom  TCACCAGCATTTAAAATTACCTTCTGTTTATTTCTTAGGACTCTGACATGACAATA----AATTT  
right  CCGCCCGCCTCGGCCTCCCAAAGTGCTGGGATTACAGGCGTGAGCCACCACGCCCGGCCAATTT  
1*1**1**1*11111*11*1111**1*1111*111***11*11*1**11**111111111*  
*****222222
```

```
left   TTTTTTTTTTTTTTTTTTTTTTTTTTTTGGAGACGGAGTCTCGCTCTGTCGCCCAGGCT  
chrom  AAGATTCAAGGAATCAGATATTC-AGAT--ATTATTGCTTAGGCTCT-ATTCA  
right  AAGATTCAAGGAATCAGATATTC-AGAT--ATTATTGCTTAGGCTCT-ATTCA  
2222**2222222*2222*2**22***222*2*2*2***22*2*2*22*22*22*2
```

Other Simple Repeat Low Complexity DNA LTR LINE SINE

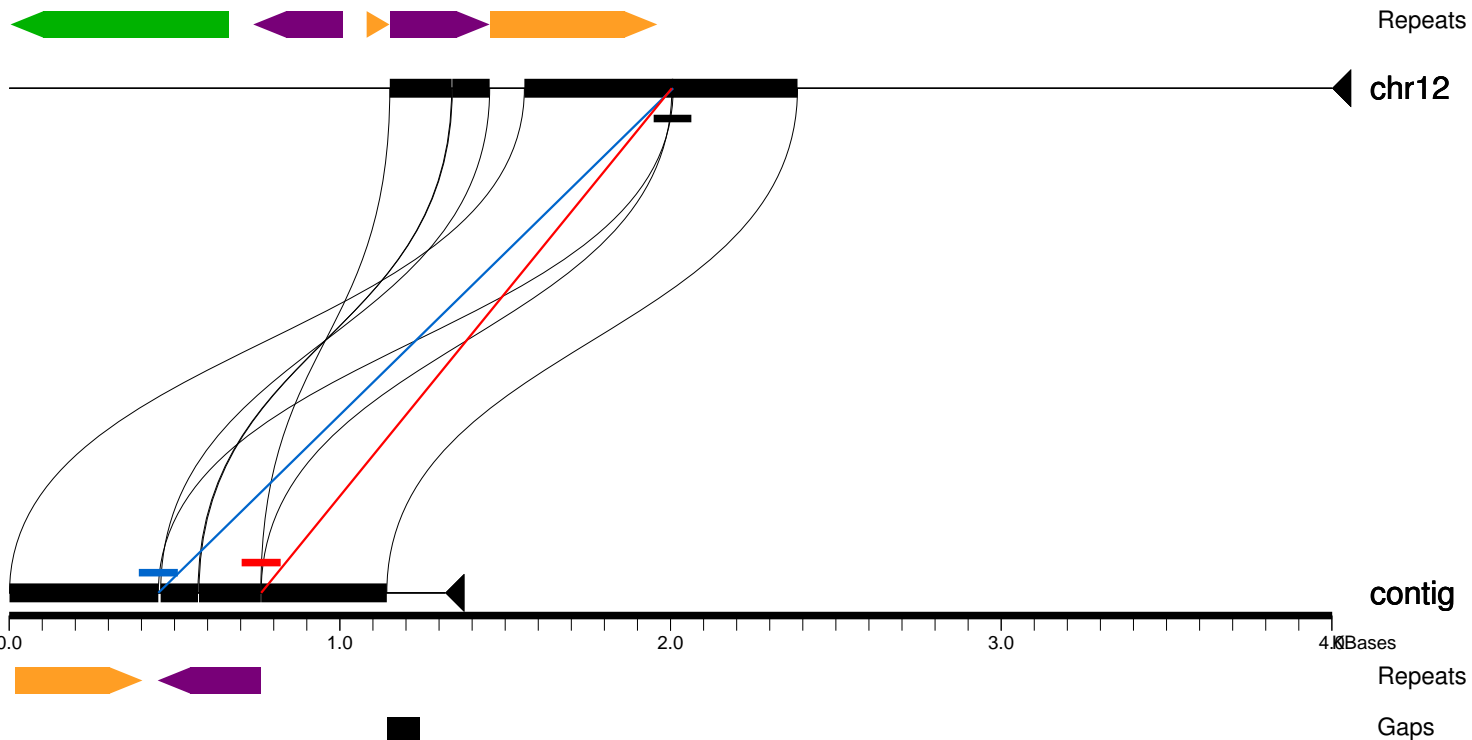











siteID: chr12\_70679900 Scafftig2 + Breakpoint: chr12:70679887

chr12:70679875-70679946

Overlap Length: 48 INS size: 417 Genotyped: No

```

left  T-----AAA-----TAAGCGAT-----CATATTTTCTA
chrom T-----AAA-----TAAGCGAT-----CATATTTTCAA
right CCGCCCGTCTCGGCCTCCCAAAGTGCTGGGATTACAGGCGTGAGCCACCGCGCCCGGCCCATATTTTCAA
      11111111111111111111***1111111111111111111*1***1*1111111111111******2*

```

```

left  ACACTATGTGAAAATAACAGAAGAGAGAACTTTATGAAGNNNNNNNNNNNNNNNNNNNNNNNNNNNNNNNNNN
chrom ACACTATGTGAAAATAACAGAAGAGAGAACTTTATGACGTTAGAGAAGT-----
right ACACTATGTGAAAATAACAGAAGAGAGAACTTTATGAAGTTAGAGAAGT-----
      *****N*2222222222222222222222222222222222222222222222222

```

```

left  NNNNNNNNNNNNNNNNNNNNNNNNNNNNNNNNNNN
chrom -----
right 22222222222222222222222222222222

```

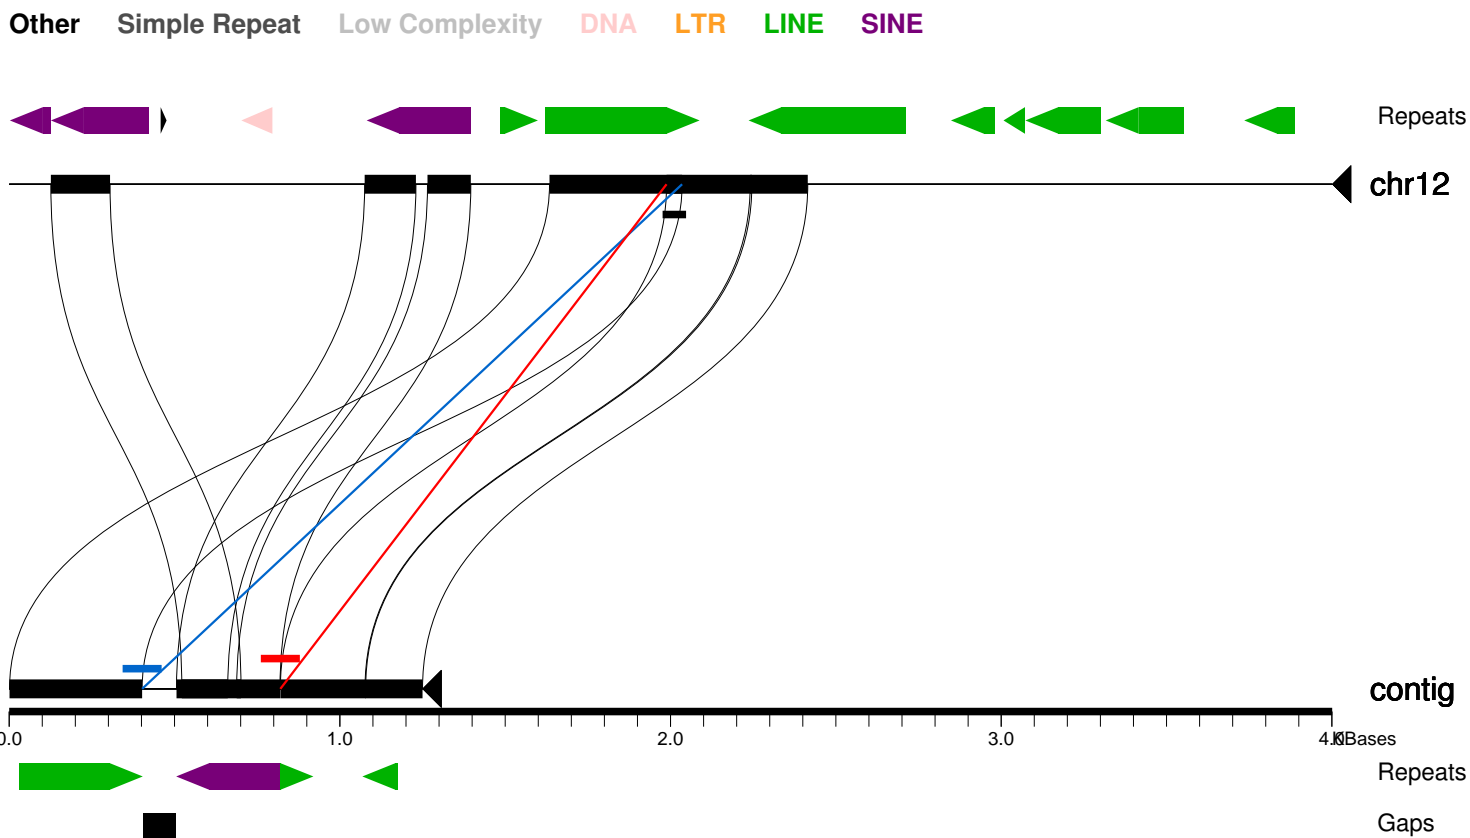

siteID: chr12\_71525481 Scaffitg1 + Breakpoint: chr12:71525468

chr12:71525420-71525527

Overlap Length: 12 INS size: 450 Genotyped: No

```
left  CATGTCTGATCCTAGCAAGGGTCTGTCTGACAT-----GTAGTAGGCACTGAAGAATAACAGTA
chrom CATGTCTGATCCTAGCAAGGGTCTGTCTGACAT-----GTAGTAGGCACTGAAGCAATAACAGTA
right NNNNNNNNNNNNNNNNNNNNNNNNNNNNNNNNNNNNNNNNNNNNNNNNNNNNNNNNNNNNNNNNNNNNN
11111111111111111111111111111111111111111111111111111111111111111111
*111*1*****

left  AGGCCGGGCGCGGTGGCTCACGCCGTGTAATCCCAGCACTTTGGGAGGCCGAGGCGGGTGG
chrom AATAAATGAAATACTAATATCAATTGTAAT-----TTTGTACACATTC---TTCT
right AATAAATGAAATACTAATATCAATTGTAAT-----TTTGTACACATTC---TTCT
*222222*222222222*22*222*****22222222***2*2*22*22222222*22
```

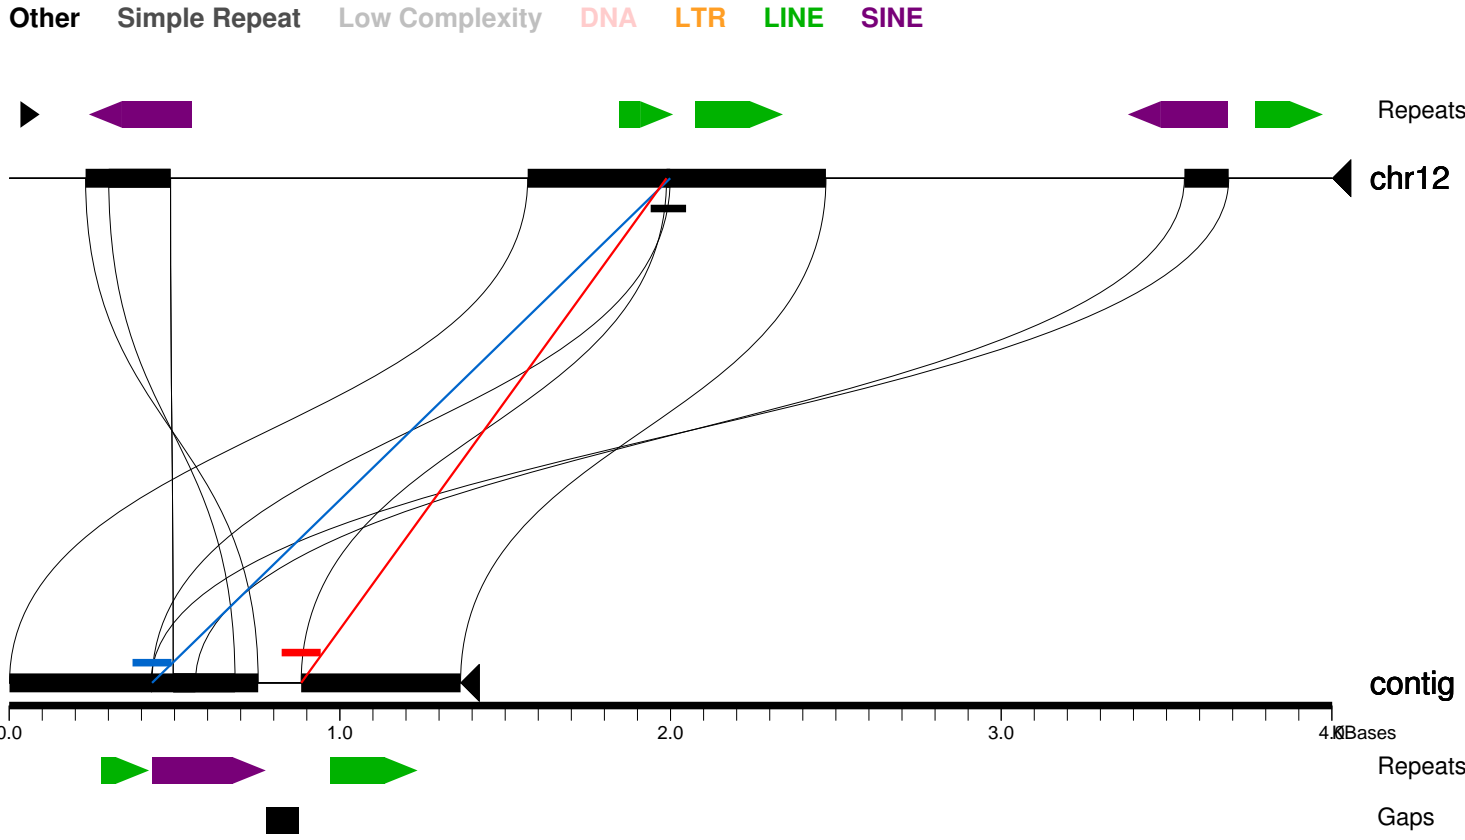

siteID: chr12\_73056541 Scafftig1 - Breakpoint: chr12:73056650

chr12:73056591-73056711

Overlap Length: -1 INS size: 141 Genotyped: Yes

```
left  GTCCACTGTTTTTTTTCTGT--TCCAAAAT--CAATTACATCACAACTAATTGACATAATCTGTATGGTG
chrom GTCCACTGTTTTTTTTCTGT--TCCAAAAT--CAATTACATCACAACTAATTGACATAATCTGTATATT
right ACCGAGA-TTTCGCCACTGCACTCCAGCTGGGCGTTGGAGTGAGACCC---TGTCTTAAAAAA--ATATT
      11*1*111***11111***111***111111*11*1111*1*1*1*1111**1*1***11111N222*2
```

```
left  GGCGTCTGTAGTCCCAGCT-ACTAGGGAGGCTGAGGTGGGAGGACTGCC-TGAGC-
chrom TCATTCAGTTG-CCAAGCTCACTCCACAGTACTAAATATATCTTCTATAGTGGTCA
right TCATTCAGTTG-CCAAGCTCACTCCACAGTACTAAATATATCTTCTATAGTGGTCA
      2222**2**2*2**2***2***2222**2222*22*2222222**2222**22*2
```

Other Simple Repeat Low Complexity DNA LTR LINE SINE

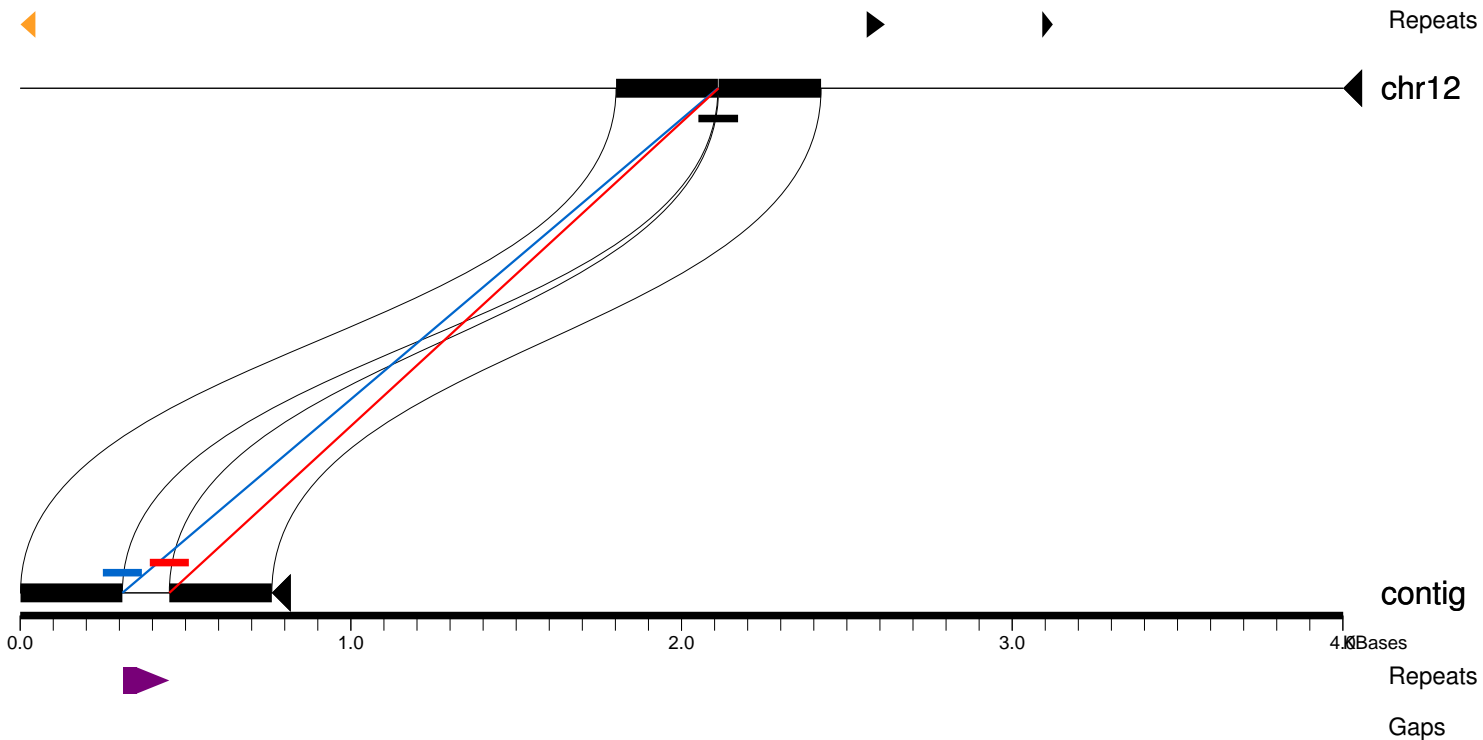

siteID: chr12\_75320674 Scafftig5 + Breakpoint: chr12:75320677

chr12:75320632-75320736

Overlap Length: 15 INS size: 304 Genotyped: Yes

```
left  AAAAAAGGATGAG--TTC--ATGTCCTTTGAATGGACATGTATGAA-----GCTGGAAACCATC
chrom AAAAAAGGATGAG--TTC--ATGTCCTTTGAATGGACATGTATGAA-----GCTGGAAACCATC
right CACCCGCCTCGGCCTCCCAAAGTGCTGGGATT--ACAGGCGTGAGCCACCCGCGCCCGGCCTGAAACCATC
      1*111*11*11*11*11*1*11*1**1*11*1*11***1*11***111111111111111111**11*****
```

  

```
left  ATTCTTTTTTTTTTTTTTTTTTTTGGAGACGGAGTCTCGCTCTGTC-GCCCAGGTCGGACTGC--GGACTGC
chrom ATTCTT-----GGCAAACACTATCACAAAGACAGAAAACCAAACACTGCATGTTCTCA
right ATTCTT-----GGCAAACACTATCACAAAGACAGAAAACCAAACACTGCATGTTCTCA
      *****22222222222222222222*2*22*2*2*2*2*222*2*2*222*222222*****22*22*22
```

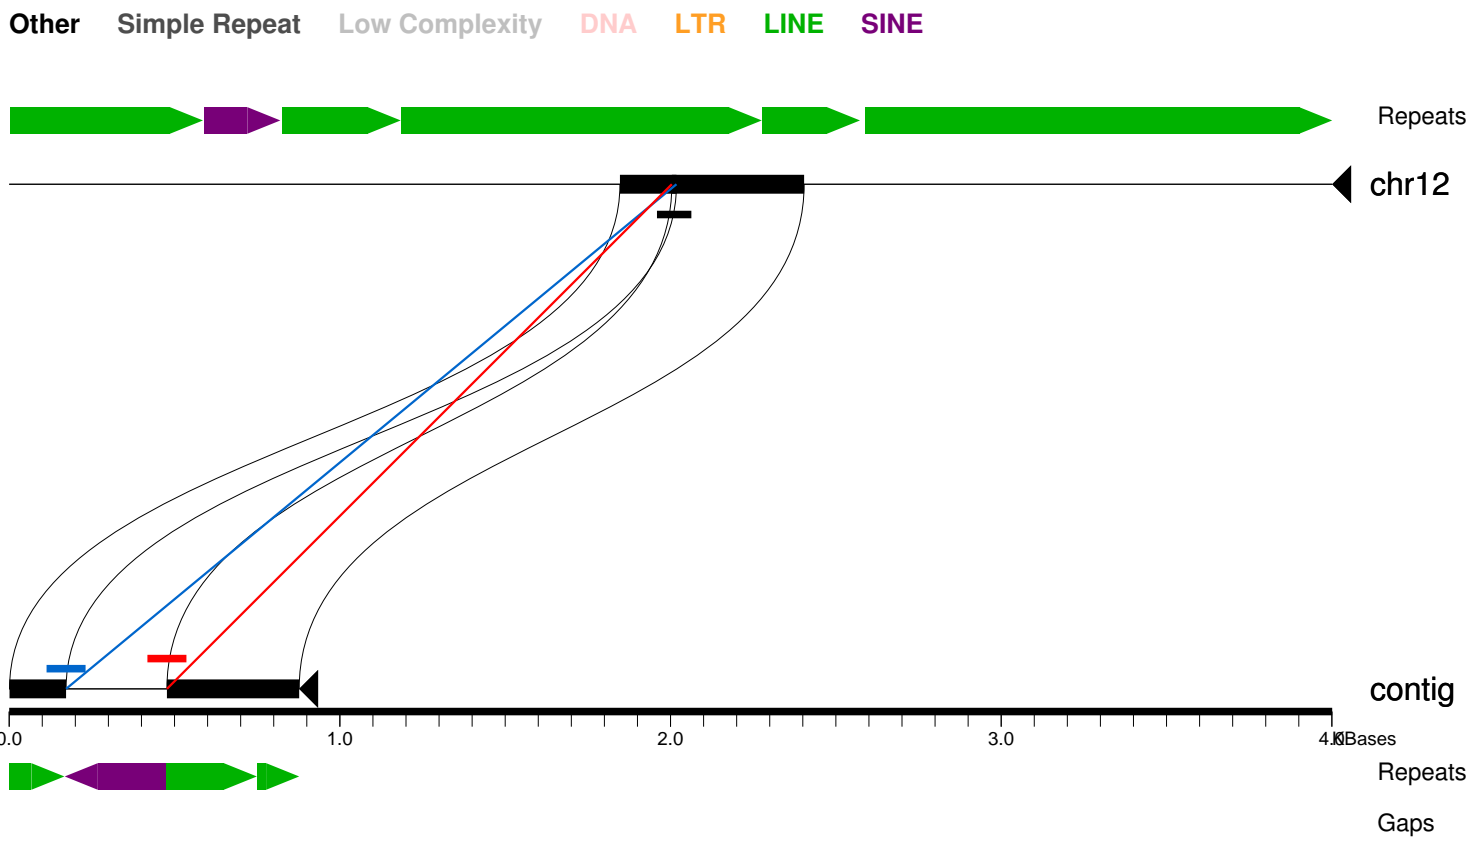

siteID: chr12\_7603964 Scaffitig2 + Breakpoint: chr12:7603969

chr12:7603950-7604028

Overlap Length: 41 INS size: 403 Genotyped: No

```

left  AA-----GT-----ACATCATTTTCC-----AAA---GAACGTGATT
chrom AA-----GT-----ACATCATTTTCC-----AAA---GAACGTGATT
right AGCCGGGATGGTCTCGATCTCTTGACCTCGTGATCCGCCCGCCTCGGCCTCCCAAAGTGAACGTGATT
      *1111111111**1111111111111**1**1*11**11111111111111111111***111*****
  
```

```

left  TTTTAACTAGGTGACTGAAGTGACCAAGTGNNNNNNNNNNNNNNNNNNNNNNNNNNNNNNNNNNNNNNNNNNNNNNN
chrom TTTTAACTAGGTGACTGAAGTGACCAAGTGATATAGACATTAAAAAATAA-----
right TTTTAACTAGGTGACTGAAGTGACCAAGTGATATAGACATTAAAAAATAA-----
      *****22222222222222222222222222222222222222222222222222222222222222222222
  
```

```

left  NNNNNNNNNNNNNNNNNNNNN
chrom -----
right -----
      222222222222222222222
  
```

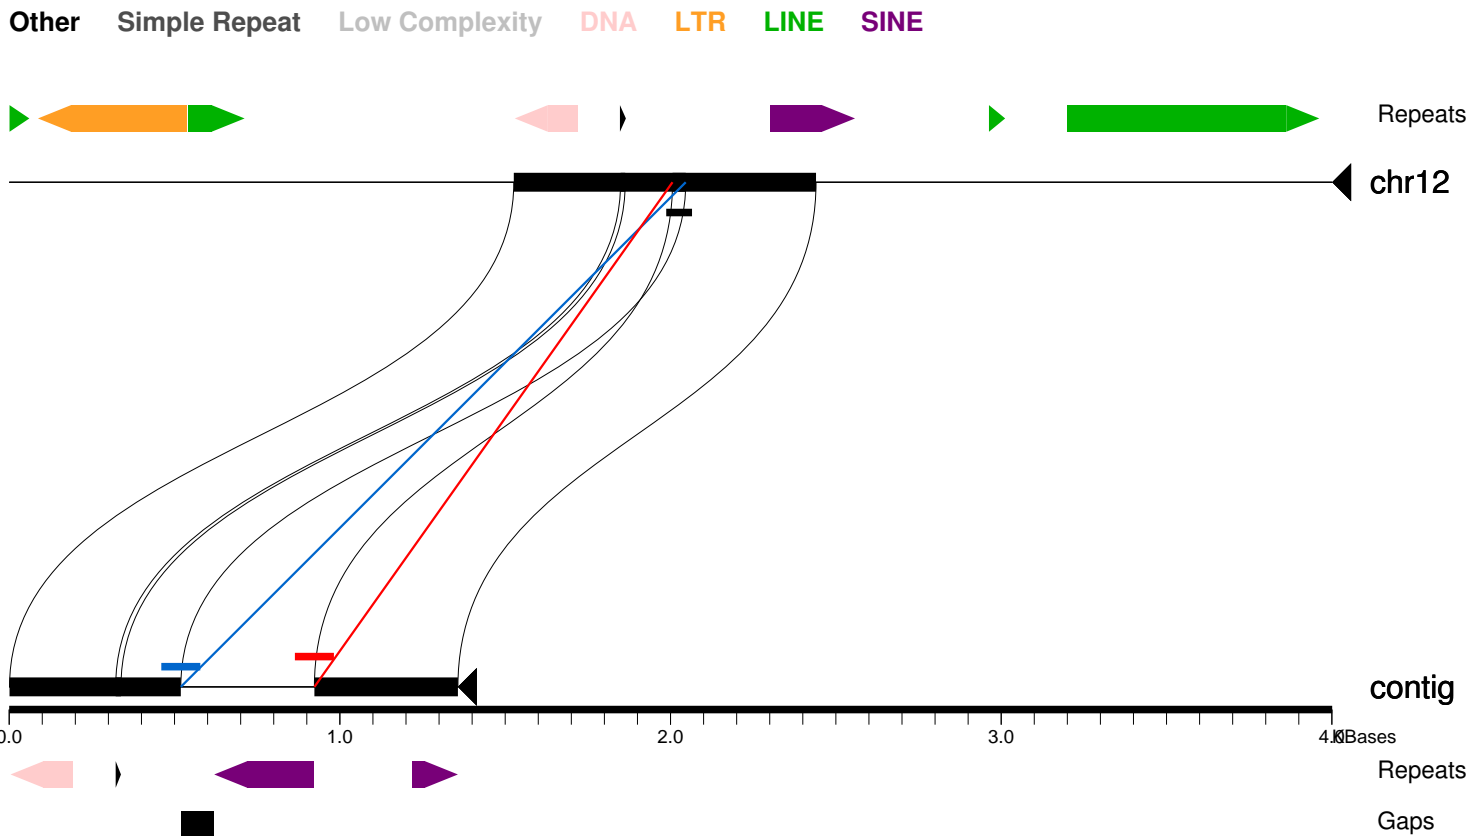

siteID: chr12\_7624174 Scafftig2 - Breakpoint: chr12:7624181

chr12:7624137-7624231

Overlap Length: 16 INS size: 297 Genotyped: Yes

```
left    C-----TTCAG--TGTGCATAAGAATTACTTTTATTCC----ATGGAAATACAGTAA
chrom   C-----TTCAG--TGTGCATAAGAATTACTTTTATTCC----ATGGAAATACAGTAA
right   CGAGATCCCGCCACTGCACTCCAGCCTGGGCGACAGAGCGAGACTCCGTCTCAAAAAAAAAAAAAAAAAAA
*1111111111111111111111111111*1***11**1**111***111*111*111**11111*111***1*1*11**
```

```
left    GATTAAGAAATGCCGGCCGGGCGCGGTGGCTCACGCCTGTAATCCAGCACTTTGGGAGGCCGAGGCGGG
chrom   GATTAAGAAATGCCATTTATAGGAGCTGGC-----AA-----GATGGCTGAATAGGA
right   GATTAAGAAATGCCATTTATAGGAGCTGGC-----AA-----GATGGCTGAATAGGA
*****22222222*2*2***2222222222**222222222222*22***2**222**2
```

```
left    CGG
chrom   AC-
right   AC-
222
```

Other Simple Repeat Low Complexity DNA LTR LINE SINE

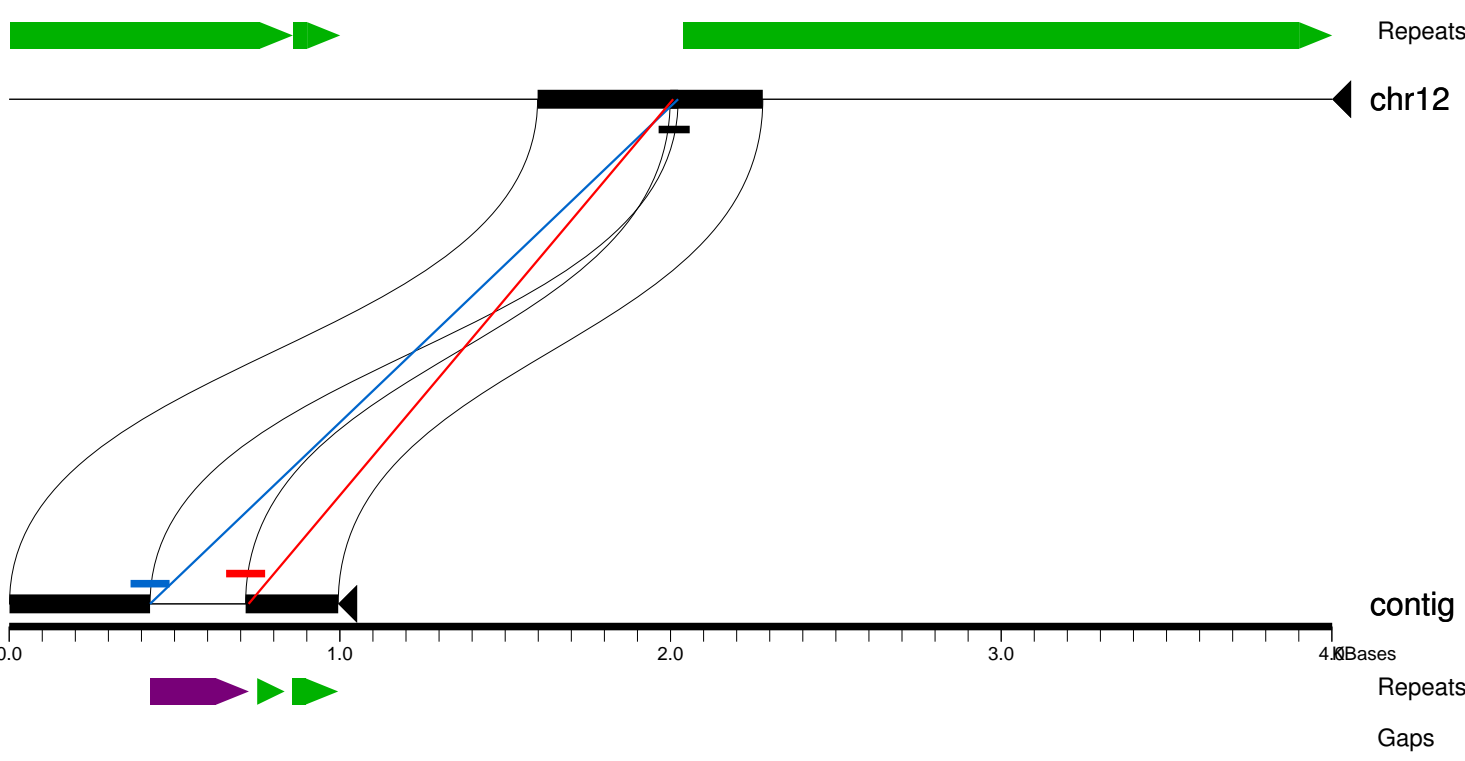

siteID: chr12\_76823055 Scafftig1 - Breakpoint: chr12:76823044

chr12:76822913-76823113

Overlap Length: 15 INS size: 302 Genotyped: Yes

```
left ATTAAATATGTCTCAACATGAAAGCACATGTAAATACACATACAAAAATAAAAAGGATAGCTTAAAAACAAT
chrom A-----ACATGAAAGCACATGTAAATACACATACAAAAATAAAAAGGATAGCTTAAAAACAAT
right C-----AGGAGAATGGC---GTGAACCCGGG-----AGGCGGAGCTTGCAGTGAG
122222222222222222*111***1*11111***1**11*111111111111111*1*111*****11*111*1
```

```
left TTTAGATTAG---ACAGCATTCTTATCCATGTACATATATTCATTGCAAGAAGTATACGACCGTACTTTTC
chrom TTTAGATTAG---ACAGCATTCTTATCCATGTACATATATTCATTGCAAGAAGTATACGACCGTACTTTTC
right CCGAGATTGCGCCACTGCAGTCCACAGTCCGGCCTGGGCGACAGAGCGAGAC---TCCGTCTCAAAAAA
111*****11111*1**1***1*11111111*11*1111111*11**1***1111*1**1*111*11111
```

```
left CTCTGGATAAAAAAGTTCTTTATAGGCCGGGC GCGGTTGGCTCACGCCGTAATCCCAGCACTTTGGGAGGC
chrom CTCTGGATAAAAAAGTTCTTTATAA-----TTTCATATATATAATTTAAA-----
right AAAAAAA-AAAAAGTTCTTTATAA-----TTTCATATATATAATTTAAA-----
1111111*1*****1*222222222222222222***2222*2****222*222222222222222
```

```
left CGAGGCGGTTGGATCATGAGGTCAGGAGATCGAGACCATTCTGGCTAACAAGGTGAAACCCCGTCTCTAC
chrom -----ATCATCCAATAAAAAATTTAGTGAGCAC-----CTAC-----
right -----ATCATCCAATAAAAAATTTAGTGAGCAC-----CTAC-----
222222222222*2222*2*22*22*2*2*2**222222222222222222222222222222222222***
```

```
left TAAA-----
chrom TATG-----
right TATGTGTTGGGAACATATGTTAGGCACAGCTATGTTAGGCACCTTAGTTTCCGCTCTTACTGAGCTTTCAA
**22111111111111111111111111111111111111111111111111111111111111111111
```

```
left -----
chrom -----
right TATGAATGAGTACATGTTTCATTATATGTT
11111111111111111111111111111111111111111111111111111111111111111111
```

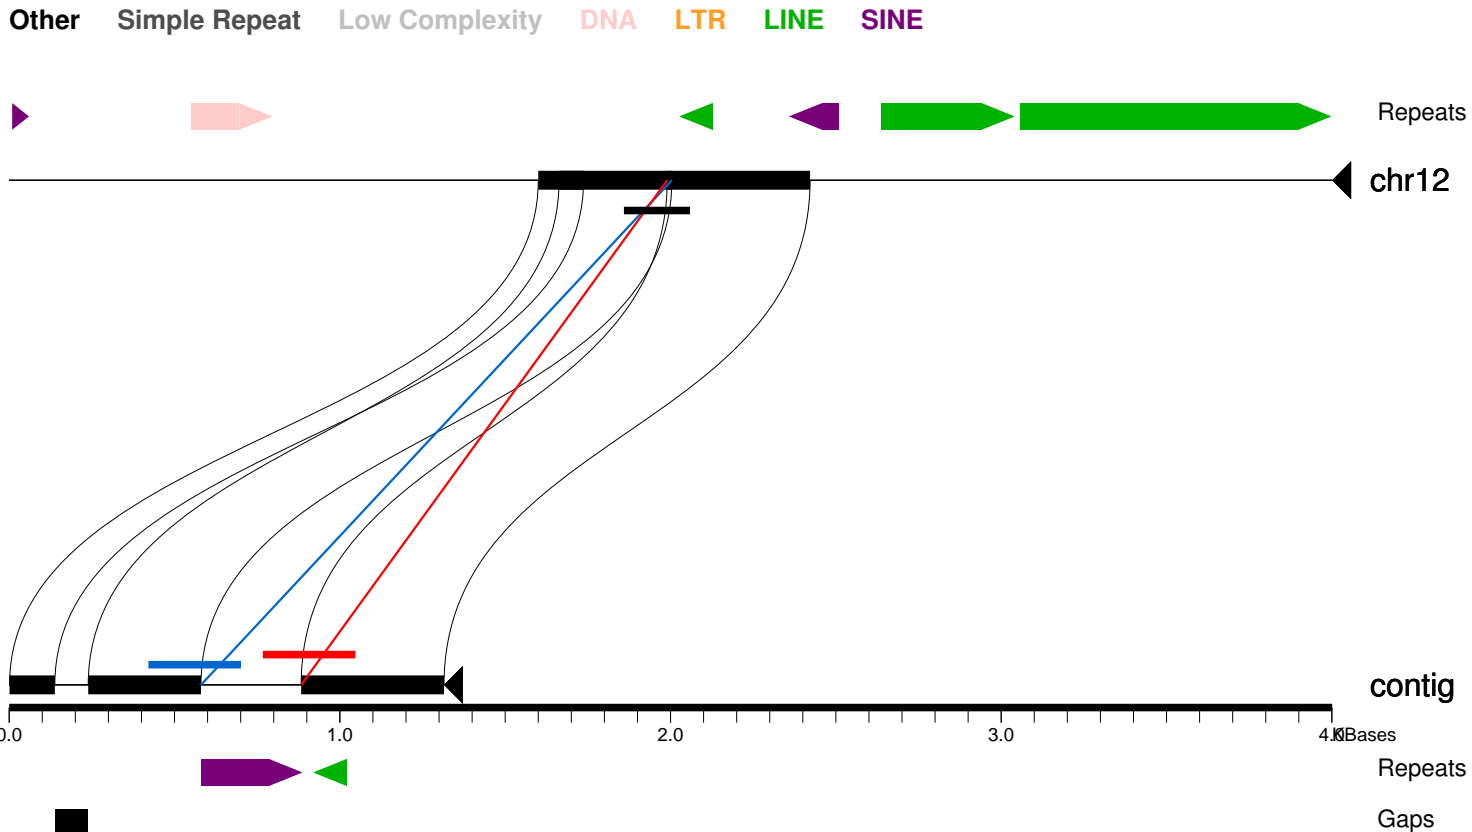

siteID: chr12\_77965034 Scaffitig1 - Breakpoint: chr12:77965041

chr12:77964997-77965100

Overlap Length: 16 INS size: 300 Genotyped: Yes

```
left   TTA---TCTAGC-TGGCCTTG-----GAAACCACTGG-----ATTATATGATCCCTTTAAGAAGAAGTA
chrom  TTA---TCTAGC-TGGCCTTG-----GAAACCACTGG-----ATTATATGATCCCTTTAAGAAGAAGTA
right  CTGCACTCCAGCCTGGGCGACAGAGCGAGACTCCGTCTCAAAAAAAAAAAAAAAAAAAAAAAAAAAAGAAGAAGTA
       1*11111**1***1***1*111111111**1**11*1111111111*11*1*11*11111111******
```

```
left   CTGTGGCCGGGCGCGGTGGCTCACGCCTGTAATCCCAGCACTTTGGGAGGCCGAGGCGGGCGGA
chrom  CTGTG-----CATAGTGTAT-----CTGTAA-CCCAGTAAGGCACTTGACAGATTTGTTT---
right  CTGTG-----CATAGTGTAT-----CTGTAA-CCCAGTAAGGCACTTGACAGATTTGTTT---
       *****222222*222***22*22222*****2*****2*22222222*2*2**222*222222
```

Other Simple Repeat Low Complexity DNA LTR LINE SINE

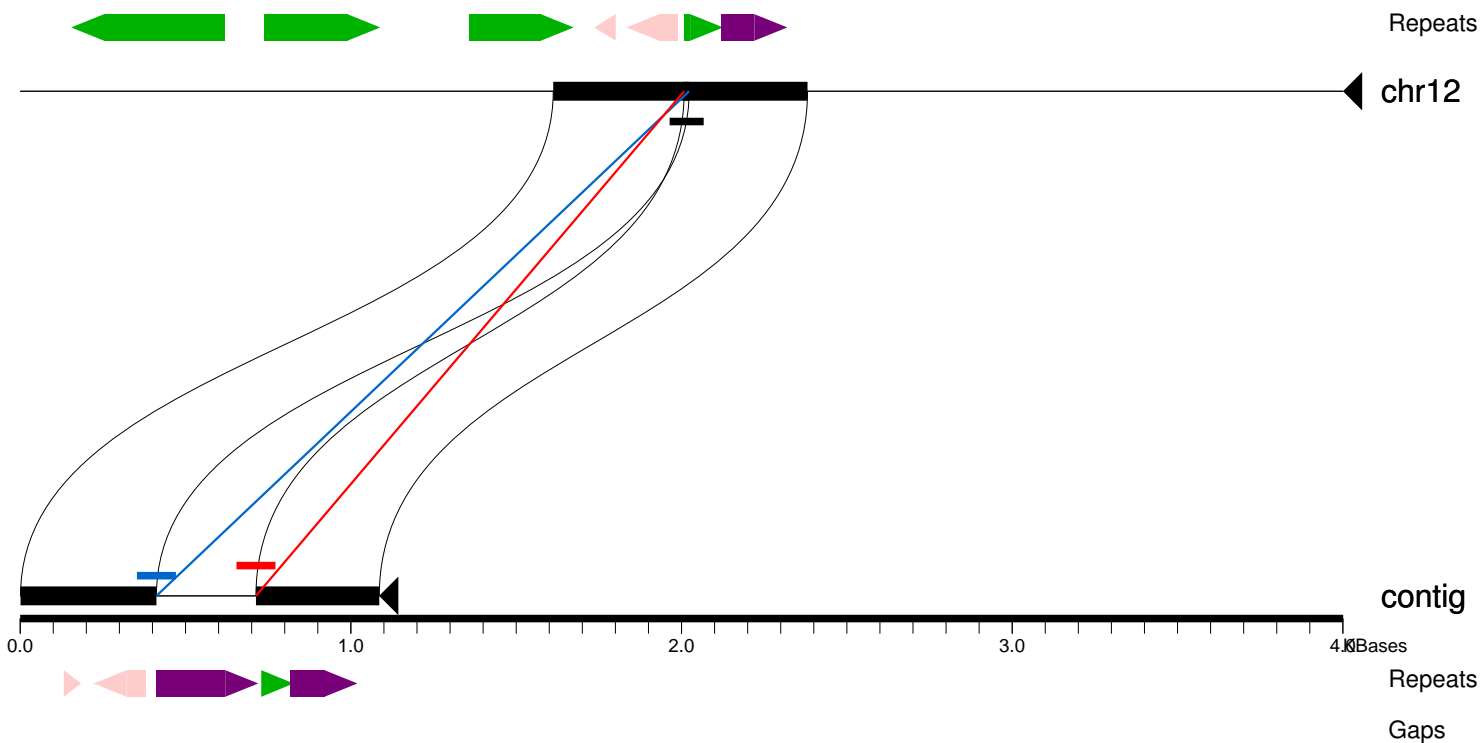



siteID: chr12\_78396945 Scaffitg1 + Breakpoint: chr12:78396934

chr12:78396774-78397108

Overlap Length: 15 INS size: 319 Genotyped: Yes

```
left -----AAATTGTACAACCTCTCCACAGAGTGGCACTCTAATATTGCAAAGGTACAATATAAGCA
chrom GTAAGCTTCTCTAAATTGTACAACCTCTCCACAGAGTGGCACTCTAATATTGCAAAGGTACAATATAAGCA
right TTTAG-----TAGAG-----ACGGGGTTTCACCTTGTTA--GCCAGGATGGTCTCGATCTC
N2N22 2*1*11111111111111111111**1*1**11***11*11**11**1*1*1*1111*11*1111
```

```
left TGTGCAGAATGAACAGCTCTTCTAGGATCCCTATAAAAACTCCACCCCATGTTTCTGTTGAGTCACTATAA
chrom TGTGCAGAATGAACAGCTCTTCTAGGATCCCTATAAAAACTCCACCCCATGTTTCTTTTGGAGTCACTATAA
right CTGACCTCATGATCCACCCGCTCGG---CCTCCCAAAGTGC-----TGGG--ATTACAG
1111*1111***1*11*1*11**1**111***111***1*1*11111111111111N1**1*11*1**1*1
```

```
left AATTGATG-ACTGAGGCAATACACGAGCAATTATTTT-----TTTTTTTTTTTTTTTTTTTT-----TTTTTTTTTTTTTT
chrom AATTGATG-ACTGAGGCAATACACGAGCAATTATTTATGCAAAGCAGTGTGAGGAGGTGCATGAGGATCC
right GCGTGAGCCACCCGCGCCCGCCACGAGCAATTATTTATGCAAAGCAGTGTGAGGAGGTGCATGAGGATCC
111***111**1*1*1*11111*****1*2*222222222*2*2222222*222*22222*22
```

```
left TTTTGAGACGGAGTC-----TCGCTCTGTGCGCCAGGCCGG-----ACT-----GC-----GGA
chrom ACTTAATACCAAGACATATTTAGATTTGACTGCCACTTTTCTTCAACTTAATTTTTTTTAAAGCATTTGGT
right ACTTAATACCAAGACATATTTAGATTTGACTGCCACTTTTCTTCAACTTAATTTTTTTTAAAGCATTTGGT
22**2*2**22**2*22222*2*2*2**2*22***2222222222***2222222222222**2222**2
```

```
left CTGCAGTGGCGCAATCTCGG--CTCACTG-----CAAGCTCCG---CTTCCCAGGT
chrom ATGTTGTTGTGGAATTAAGTCCTAATTTATTTATCAAAAATAAGTGGCATAGCCACA
right ATGTTGTTGTGGAATTAAGTCCTAATTTATTTATCAAAAATA-----
2*22**2*2*2**2222*22**2*2*222222**22*221 1N1NN1NNNN
```

Other Simple Repeat Low Complexity DNA LTR LINE SINE

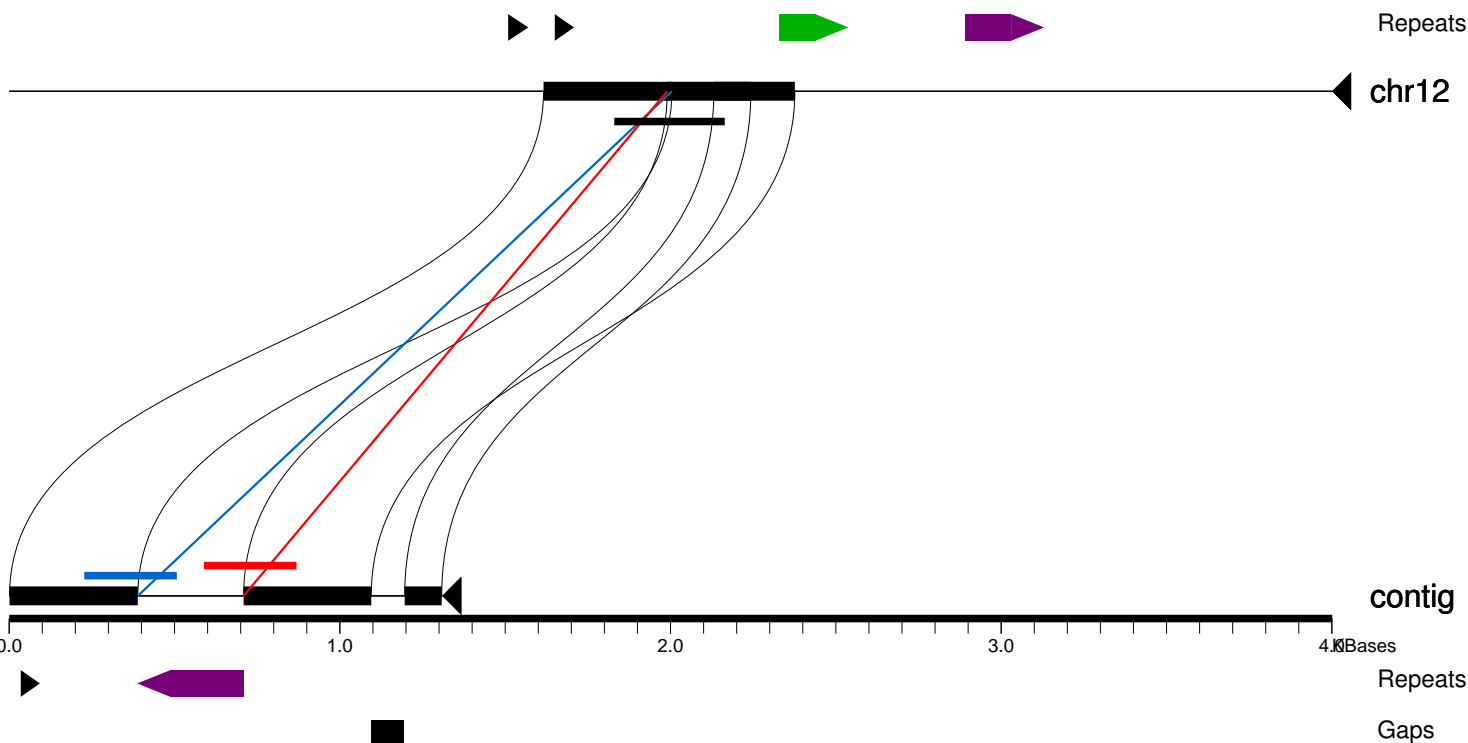



siteID: chr12\_80480716 Scaffitig1 - Breakpoint: chr12:80480718

chr12:80480667-80480777

Overlap Length: 9 INS size: 379 Genotyped: No

```
left  AGGAATGGAAGTAAAAAGTTGACGACACTTAGAATTTTCAGTCTTAAAAATTG-----GCCTTGGAGGC
chrom AGGAATGGAAGTAAAAAGTTGACGACACTTAGAATTTTCAGTCTTAAAAATTG-----GCCTTGGACA-
right NNNNNNNNNNNNNNNNNNNNNNNNNNNNNNNNNNNNNNNNNNNNNNNNNNNNNNNNNNNNNNNNNNNNNNNNN
11111111111111111111111111111111111111111111111111111111111111111111111111
*****22
```

```
left  CGGGCGCGGTGGCTCACGCCTGTAATCCACGACTTTGGGAGGCCGAGGCGG----GCGG-A
chrom ---GTGAAATGGTTCAAGG-----TGCCAGGA---TGGGATTCAGGATCAGAAATGCAATA
right ---GTGAAATGGTTCAAGG-----TGCCAGGA---TGGGATTCAGGATCAGAAATGCAATA
222*2*222**2**2*2222222*2**2*222*****22*2*222*2*222**222*
```

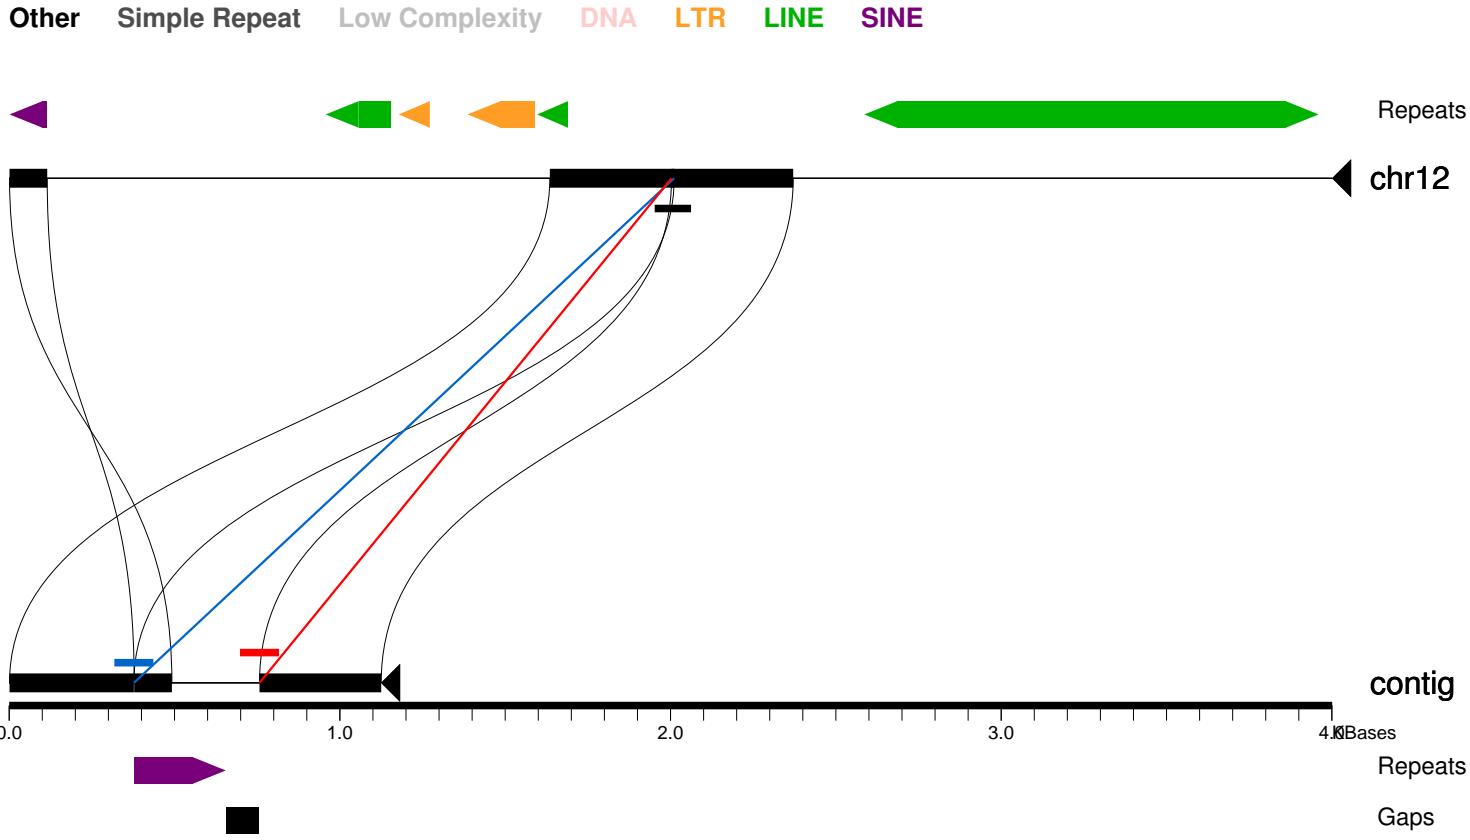

siteID: chr12\_81315258 Scaffitg3 - Breakpoint: chr12:81315220

chr12:81315060-81315393

Overlap Length: 14 INS size: 305 Genotyped: Yes

```
left -----GTTTATAAGTGACCTAGTCT-ATGGTATTTTATTATAGCAGCCCAAATAGACTAAAGC
chrom TATATATCTGTAGTTTATAAGTGACCTAGTCT-ATGGTATTTTATTATAGCAGCCCAAATAGACTAAAGC
right TA-----GTAGA-----GACGGGGTTTCACCGTTTTTTTA-----GCCGGGATGGTCTCGATC
22      222*1111111111***111**1*1*11**1*****111111111***111**1*1**11*1*
```

```
left AGACTGCTGTAACAAAATGCCATACACTGAGTGGCTTAAGCAACTGATGTTTATTTCTCATAGTTTGGGA
chrom AGACTGCTGTAACAAAATGCCATACACTGAGTGGCTTAAGCAACTGATGTTTATTTCTCATAGTTTGGGA
right TC-CTGACCTCGTGATCCGCCCCGCTC-----GGCTCCCAAAGTGCTGGG-ATTACA-----GGC
111***111*1111*111***111*1*11111***1*1111**1**1*111***1*1111111111**1
```

```
left GGCTGGCACTTCCAAGATCAGAGTGCCAGCAGATTTTTTTT-----TTTTTTTTTTTTTTGAGACG
chrom GGCTGGCACTTCCAAGATCAGAGTGCCAGCAGATTTCTACCTGACGAGGGTCTTCTTCTGGTTCTGAACAG
right GTGAGCCACCGCGCCCGCCCAAGTGCCAGCAGATTTCTACCTGACGAGGGCCTTCTTCTGGTTCTGAACAG
*111*1***11*1111111*11*****1*2*222*2222222N2**2**2*22**2***222*
```

```
left GAG---TCTCGCTCTGTCGCC--AGGCTGGAGTGCAGTGGCGGGATCTCG-GCTCACTA-----
chrom CAGCCTTCTGGATCTGTCTTTCACAAGTCAGAAAGTG-AGAGG-GAGATCAAGTGAGCACAAAGGCGTTGGG
right CAGCCTTCTGGATCTGTCTTTCACAAGTCAGAAAGTG-AGAGG-GAGATCAAGTGAGCACGAAGGCGTTGGG
2**222***2*2*****22*222**2*2*2***2**2**2*2***22*2*22***N*2222222222
```

```
left -----CAAGCTCCGC-CTCC-CGGGTTACGCCATTCTCTGCCTCA
chrom GAGGGTGGGAGGGAGCATGCTCTGCTCTCCTCTTCTTAGAAGGCTAATAATCCCATC
right GAGGGTGGGAGGGAGCATGCTCTGCTCTCCTCTTCTTAGAAG-----
22222222222222**2***2**2***2*222**22222NN1NN1NN1N1NNN
```

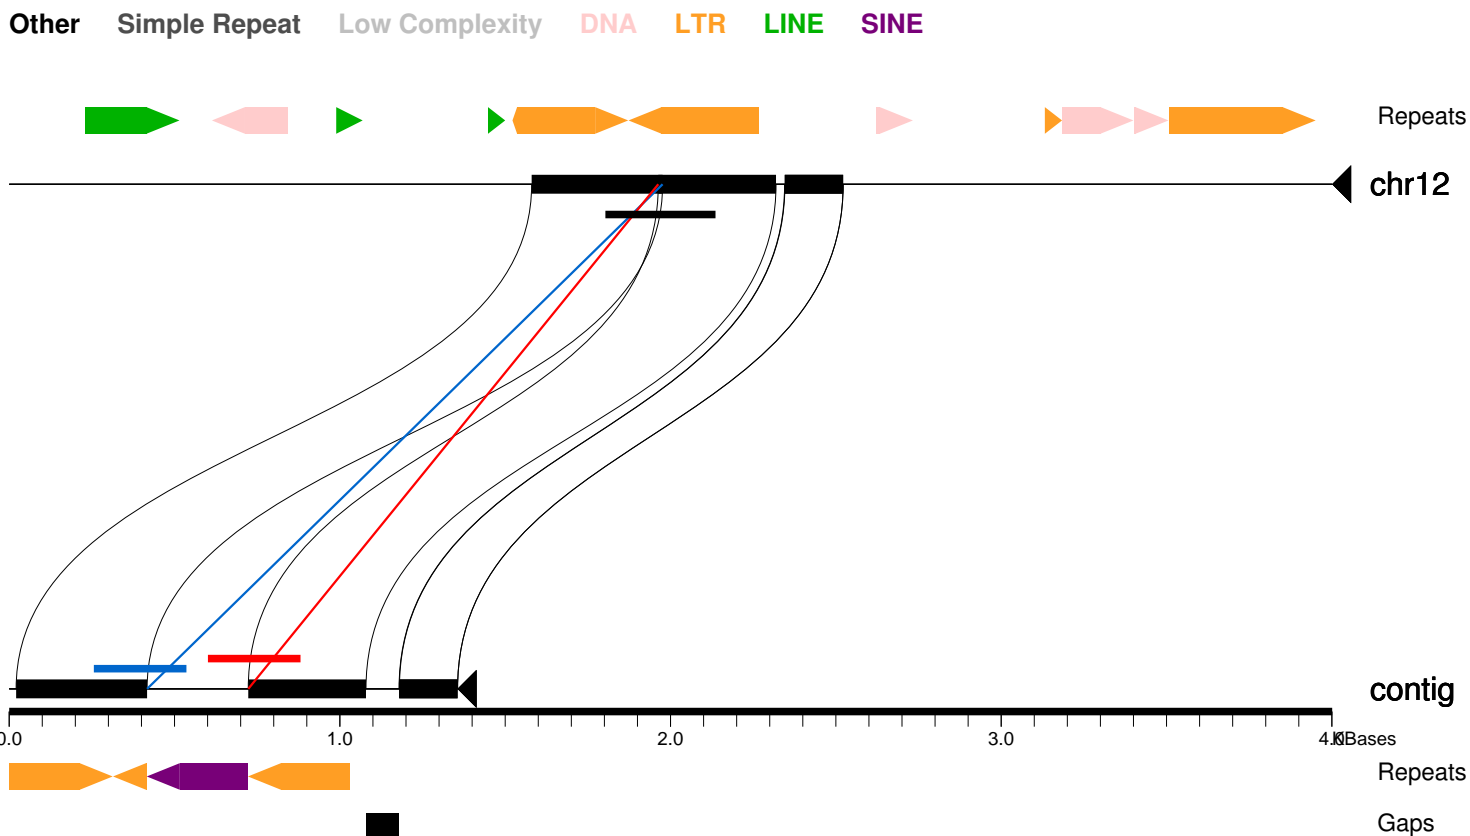



siteID: chr12\_87870833 Scafftig4 + Breakpoint: chr12:87870815

chr12:87870793-87870874

Overlap Length: 9 INS size: 309 Genotyped: Yes

```
left    TTAT-----AGGTGC---ATT-----TGTTC AATA-----CTGTTTCTTTT
chrom   TTAT-----AGGTGC---ATT-----TGTTC AATA-----CTGTTTCTTAT
right  CCACCCGCCTCGGCCTCCCAAAGTGCTGGGATTACAGGCGTGAGCCACCGCGCCCGGCCCTGTTTCTTAT
      11*1111111111111111111111111111*1****1111***1111111111**11*1*1111111111111111*2*
```

```
left    TTTTTTTTTTTTTTTTTTTTTTTTTTTTTTTTTGAGACGGAGTCTCGCTCTGTCGCCAGGCTGGAGTGCAGTGGCG
chrom   ATTCTACAAATTTCTTTGCATTTTCTG-----TCTAGCATATACT-----
right  ATTCTACAAATTTCTTTGCATTTTCTG-----TCTAGCATATACT-----
      2**2*22222***2***222****2**22222222222222222222*2*2**22*22**2222222222222222
```

```
left    CGATCTCGGCTCACTG
chrom   ----CTCATCT---TT
right  ----CTCATCT---TT
      2222***22**222*2
```

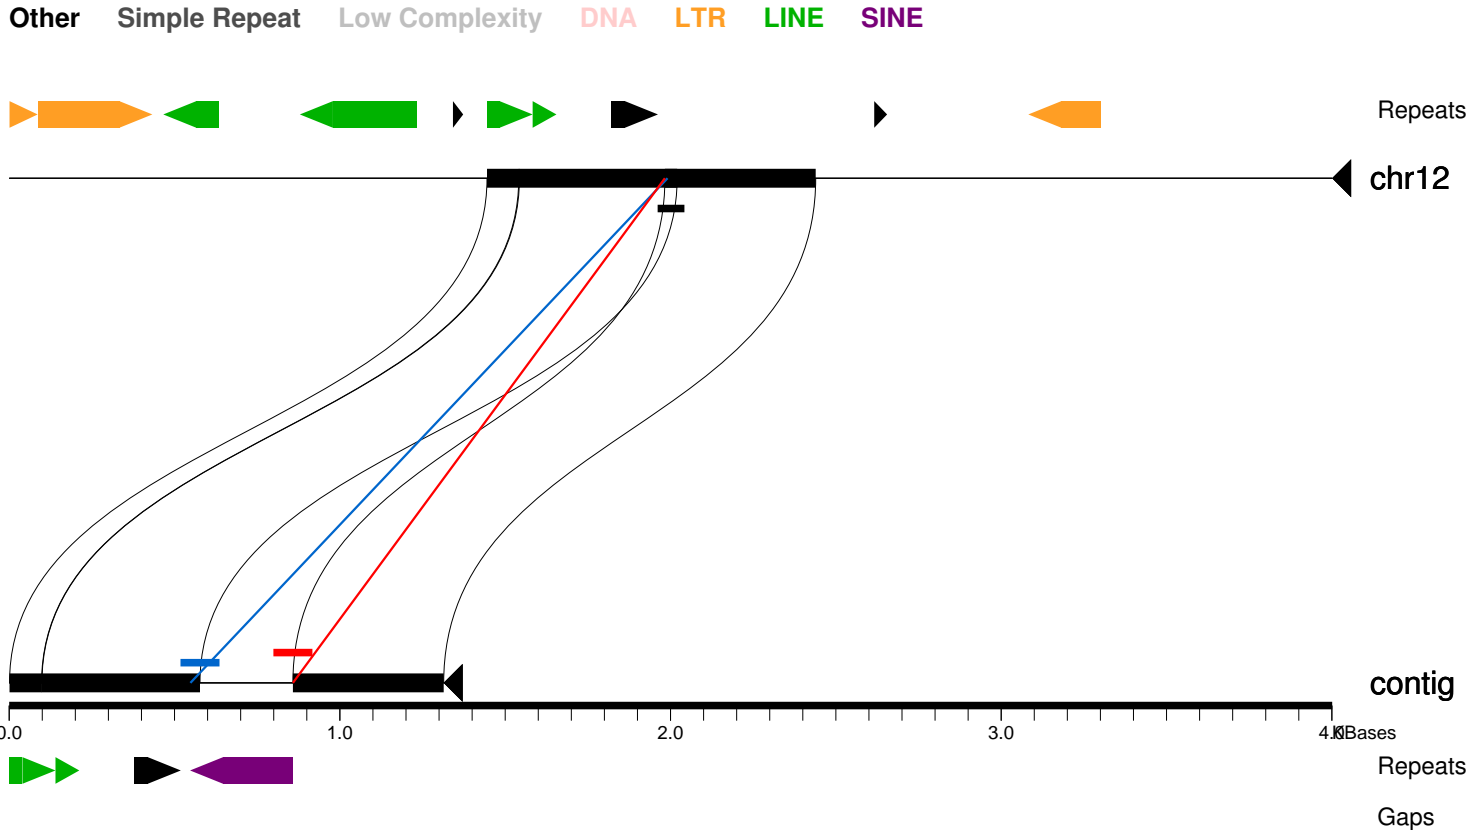

siteID: chr12\_88338175 Scafftig12 - Breakpoint: chr12:88338160

chr12:88338111-88338219

Overlap Length: 11 INS size: 297 Genotyped: Yes

```
left   -----CTAGAAAATAG-----CAAAGGTAAATTCTGACTAGAGGGAGATATAGAAATTTAAAAGAAA
chrom  -----CTAGAAAATAG-----CAAAGGTAAATTCTGACTAGAGGGAGATATAGAAATTTAAAAGAAA
right  GCCACTGCACTCCAGCCTGGGCGACAGAGCGAGACTCCGTCTCAAAAAAAAAAAAAAAAAAAAAA---AAAAGAAA
      1111111111**11*111*1*1111**1**11*1*1**1*1**11*111*1*1*1*1***111*****
```

```
left   ATGGGCCGGGCGCGGTGGCTCACGCCTGTAATCCCAGCACTTTGGGAGGCCGAGGCGGGCGG----
chrom  ATG-----ACTCATTCTTTTTATCCTTTTGTGTAACATGTACAAGTTATTTTTTAA
right  ATG-----ACTCATTCTTTTTATCCTTTTGTGTAACATGTACAAGTTATTTTTTAA
      ***22222222222222222222222222222222222222222222222222222222222222222222
```

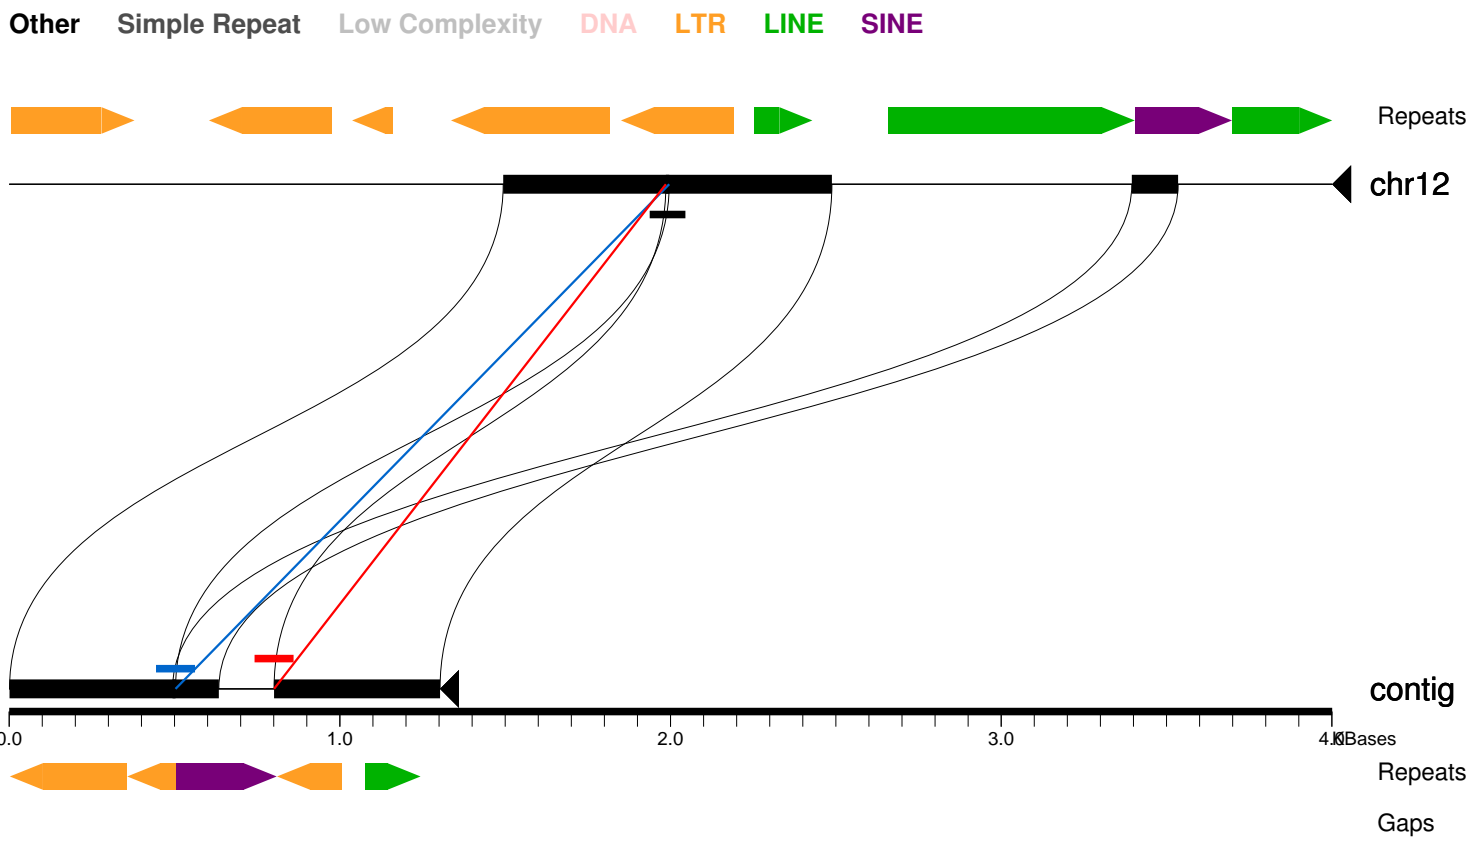

siteID: chr12\_89383745 Scaffitg2 - Breakpoint: chr12:89383752

chr12:89383705-89383811

Overlap Length: 13 INS size: 335 Genotyped: Yes

```

left      -----ATAATTC AATTTAGTTGAACACATAATTTTACATTTTACTTAAATTTTAAACATTTGTG
chrom     -----ATAATTC AATTTAGTTGAACACATAATTTTACATTTTACTTAAATTTTAAACATTTGTG
right    GACTCCGTCTCAAAAAAAAAAAAAAAAAAAAAAAAAAAAAAAAAAAAAAAAAAAAAAAAAAAACATTTCTG
          11111111111111111*1**111**111*1111**1***1**1111*1*1111*111**1111*****1**

left      TAGGCCGGGCGCGGTGGCTCACGCCTG-TAATCCCAGCACTTTGGGAGGCCGAGGCCGGGTGGA
chrom     TAGAA--GTAATGTTGGCTTAT--CTGATTGGTAAAAATAGTTTAAGAATATTA-----A
right    TAGAA--GTAATGTTGGCTTAT--CTGATTGGTAAAAATAGTTTAAGAATATTA-----A
          ***2222*2222*2*****2*222***2*222222*22*2***22**22222*222222222*

```

Other    Simple Repeat    Low Complexity    DNA    LTR    LINE    SINE

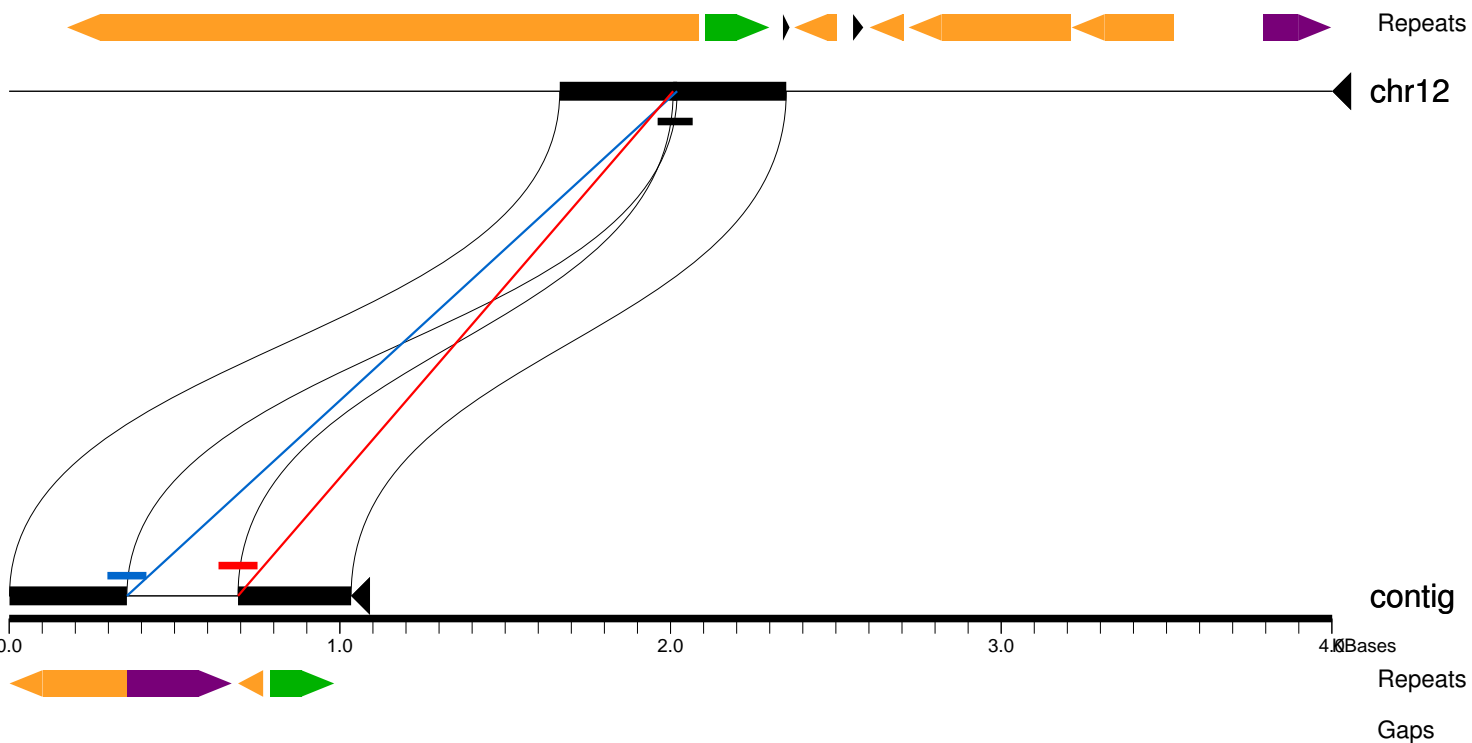





siteID: chr12\_9369225 Scaffitig8 - Breakpoint: chr12:9369226

chr12:9369180-9369282

Overlap Length: 14 INS size: 299 Genotyped: Yes

```
left  TTTTGGAAAGGA-TAGATAA-GTTGATAGAAC---ACT-----AGATAGACTAATAAAGAAAA
chrom TTTTGGAAAGGA-TAGATAA-GTTGATAGAAC---ACT-----AGATAGACTAATAAAGAAAA
right CGCGCCACTGCACTCCAGCCTGGGCGACAGAGCGAGACTCCGTCTCAAAAAAAAAAAAAAAAAAAAAA
111111*11*1*1*11*1111*11*1***1*111***111111111111*1*1*1*11*1***1***1***
```

```
left  AAAGAAGCCGGGCGCGGTGGCTCACGCCGTGTAATCCCAGCACTTTGGGAGGCCGAGGCGGGCGGA
chrom AAAGAAG---GAAGATCCAAATAAGTACAATCAGAAAT---GAAAATGAGAATTT---
right AAAGAGA---GAAGATCCAAATAAGTACAATCAGAAAT---GAAAATGAGAATTT---
*****22222222*22*222**2222**2222***2*2*2222**2222***22222222
```

Other Simple Repeat Low Complexity DNA LTR LINE SINE

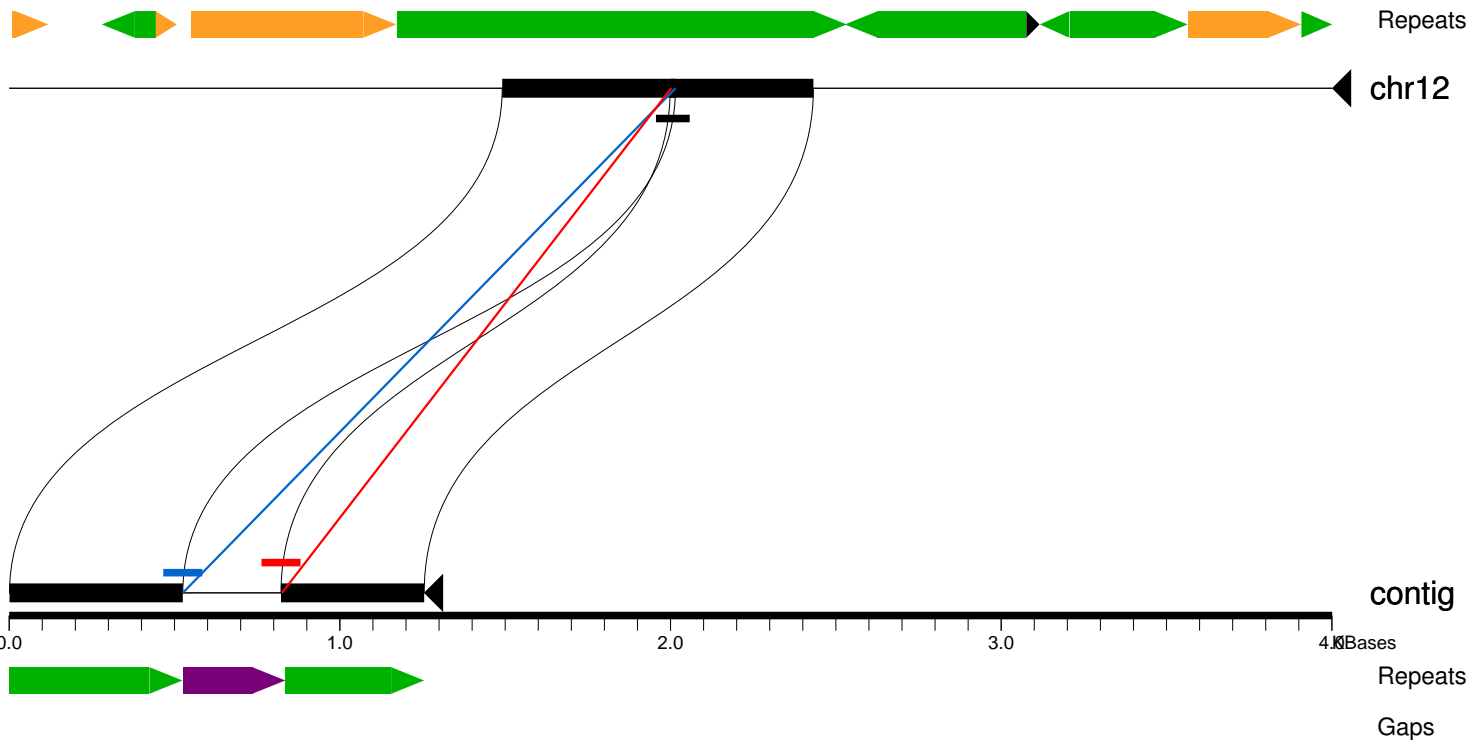

siteID: chr12\_97420077 Scafflig2 + Breakpoint: chr12:97420075

chr12:97419925-97420509

Overlap Length: 11 INS size: 290 Genotyped: Yes

```
left    GATCCTTCATAATTTGAAAGGTGGTTAAACGTGTGGATTCC-AGAGATGAAGATGTTGCTTCAAAGCCAT
chrom  ---CCTTCATAATTTGAAAGGTGGTTAAACGTGTGGATTCC-AGAGATGAAGATGTTGCTTCAAAGCCAT
right  ---CCGCGCCC-----GGCTAATTTTTTTGTATTTTTTAGCCAGGATGGTCTCGAT-----CTCT
222**11111111111111111111**1***111*1**1***111**11*1**1*1*1*1*111111*11*
```

```
left    TGAGTAGCT-ATGAGACTTTGAACTAGTAACTTGACTTCTTT--GTGCCTCACTTTTCTCATCTGTGAAA
chrom  TGAGTAGCT-ATGAGACTTTGAACTAGTAACTTGACTTCTTT--GTGCCTCACTTTTCTCATCTGTGAAA
right  TGAC---CTCATGATCC-----ACCCGC--CTCGGCCTCCCAAAGTGC-TGGGATTACAGGCCTGAGCCA
***1111**1****11*111111**11*111**1*1*1**11111****1*1111**1*11111**1*11*
```

```
left    TTGGGGTGATAATAATAGTACTTATTTT-----TTTTTT-----
chrom  TTGGGGTGATAATAATAAGTACTTATTTTAAAAGGTTTTTTTGGGAGATCAAATAATCTGAGTGAAATACCT
right  CCGCGCCCGCCTA--G-TACTTATTTTAAAAGGTTTTTTTGGGAGATCAAATAATCTGAGTGAAATACCT
11*1*1111111**111******222222*****2222222222222222222222222222222222222
```

```
left    -----TTTTTTTTTTTTTTTT-----
chrom  CTCATTGTACCTGGTACATTA AAAAGTGTCTCAATGATGAATCATTATTTAATGTGTCCTCTGCTCACTTA
right  CTCATTGTACCTGGTACATTA AAAAGTGTCTCAATGATGAATCATTATTTAATGTGTCCTCTGCTCACTTA
22222222222222222222222222222222222222222222222222222222222222222222222222
```

```
left    TTGAGAC-----GGAGTCTC-----GCTCTGTCGCCCAG
chrom  TCGAGCCCCATGTTCCATGGAATCCCCCATTGTTAGGGTCTACTCCCAGCTAATTGCTCTTTGACCCCTG
right  TCGAGCCCCATGTTCCATGGAATCCCCCATTGTT-----
*2**2*222222222222**2*2*2*2222222222 11111N1N1111N1
```

```
left    GCC-----GGACTGCG-----
chrom  ACCCATTTTTTTTCAGGTCGTTGTATCTTTTCATCCACACTAGTCTTTTCTGTTGGAATGCCTTTGCCAATTTT
right  -----
N11 111N111N
```

```
left    GACTGCAGTGGCG-----CAAT-CTCGGCTCA-CTGCAAGCTCC-----
chrom  GACTGCC-TGGCAAACCTTATTCATCCTTCAATTTCTCAGGTA AACCTGCTTGGTCCCTTGGTGGACTTATG
right  111111N21111N 1111 111N1N1N1 1111NN1N111
```

```
left    ---GCTTCCC--GGGTTTAC---GC-----
chrom  TGTGATTTCTCTTGGGCTCTCATTAATAAAGCTAATACCCCTGTTCTCCTAAGACTGTGCACTTCTGAGG
right  -----
1N111N1 111N111N 11
```

```
left    -----
chrom  CCAAGGATTGGGTCTTTCTGTCATGTTGCTAT
right  -----
```

Other Simple Repeat Low Complexity DNA LTR LINE SINE

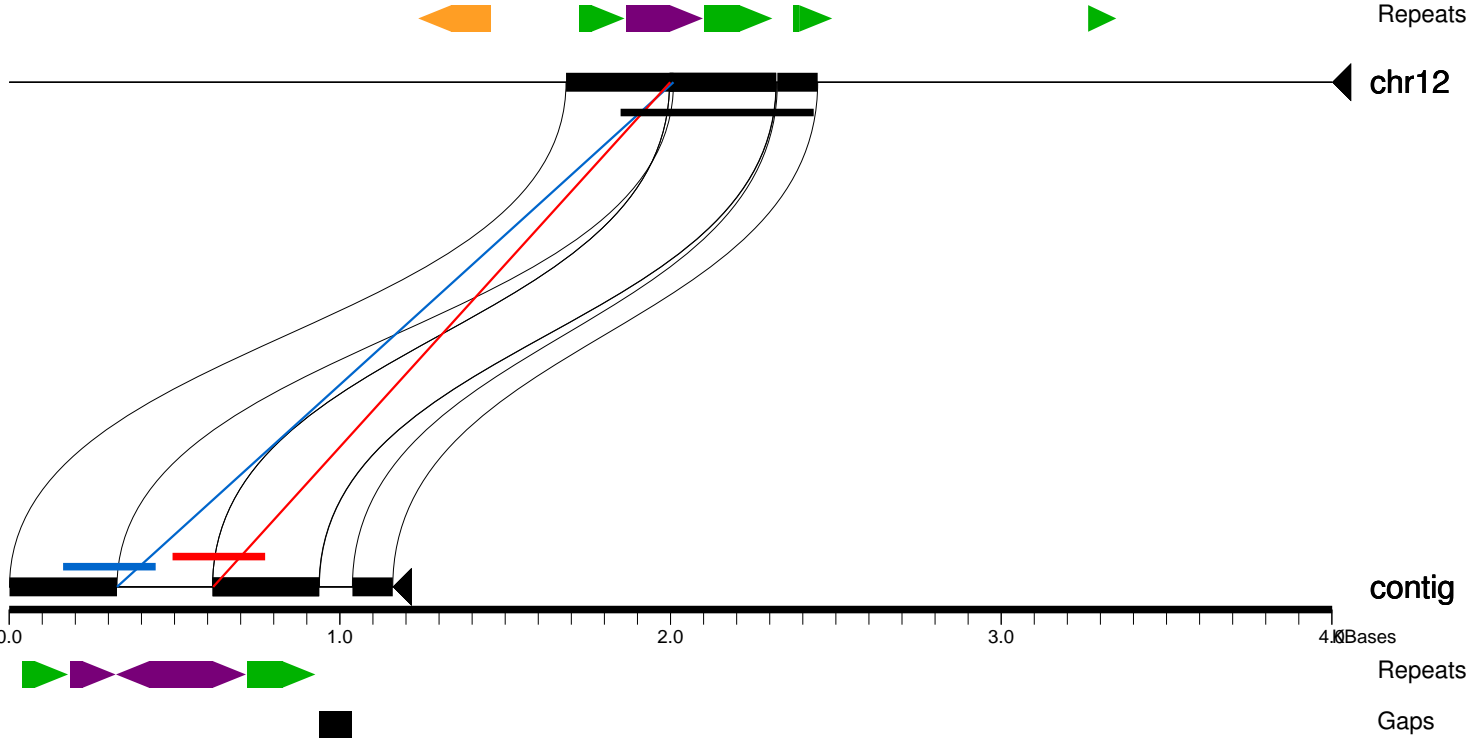

siteID: chr12\_97495339 Scaffoldig1 - Breakpoint: chr12:97495339

chr12:97495299-97495398

Overlap Length: 20 INS size: 491 Genotyped: No

```

left  TATCTGAAGGTAGGTGAATCTAAAT TGATAAAAAAT TCTAA-----CTTTTAAAAAA
chrom TATCTGAAGGTAGGTGAATCTAAAT TGATAAAAAAT TCTAA-----CTTTTAAAAAA
right NNNNNNNNNNNNNNNNNNNNNNNNNNNNNNNNNNNNNNNNNNNNNNNNNNNNNNNNNNNNNNNNNNN
      1111111111111111111111111111111111111111111111111111111111111111
      *****

```

```

left  CAAATGTAGGCCGGGCGCGGTGGCTCACGCCTGTAATCCAGCAGT TTGGGAGGCCGAGGCGGGTGGA
chrom CAAATGTAGGCAATAACAATGGATAA-----AAGATAGTTTTTT-----CAAGAATGG----
right CAAATGTAGAGGCAATAACAATGGATAA-----AAGATAGTTTTTT-----CAAGAATGG----
      *****2222222*22***2*2*2222222*2222*222***2222222*2**222**2222

```

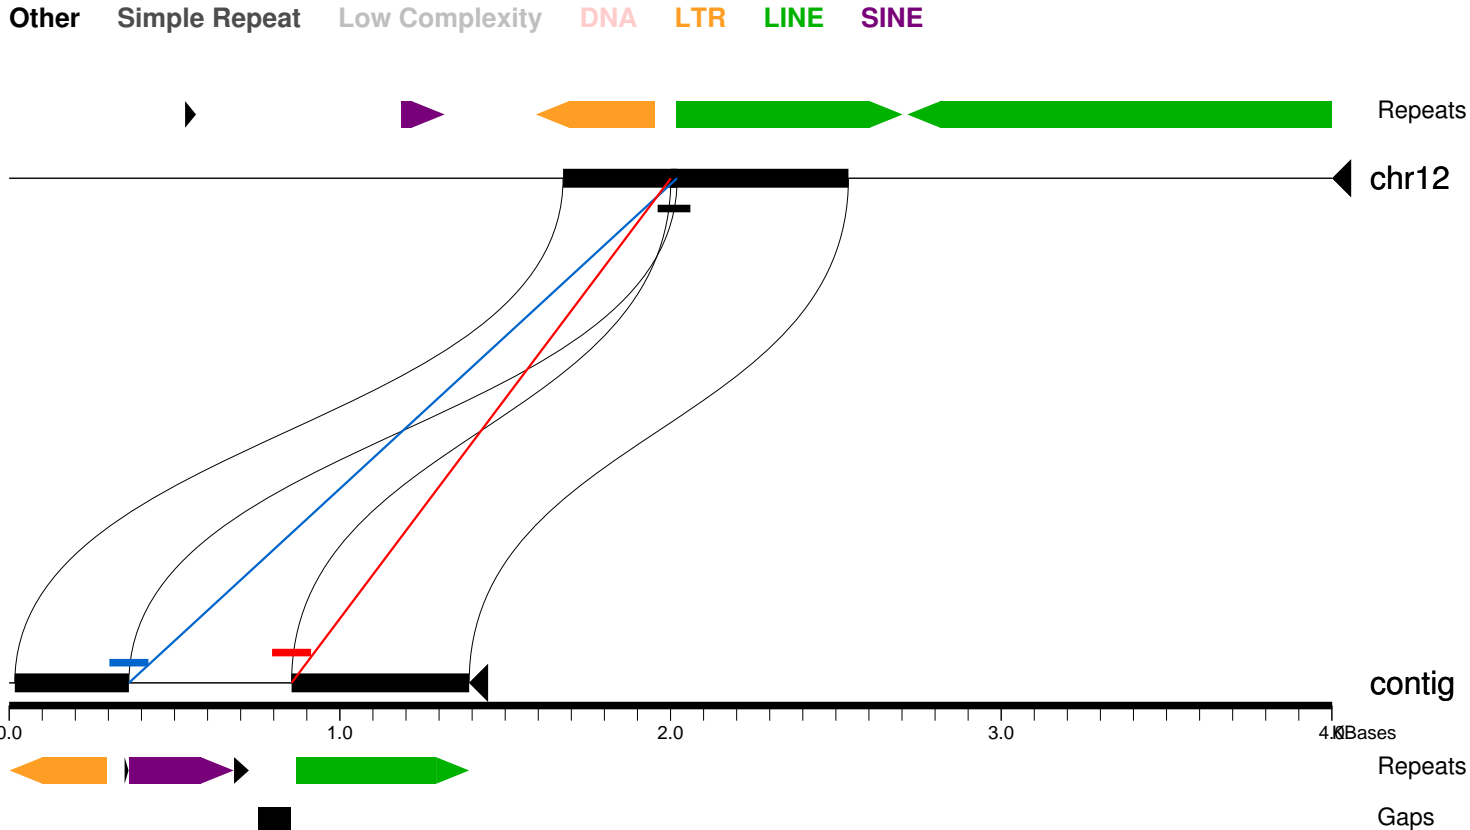

siteID: chr12\_97550757 Scafftig1 + Breakpoint: chr12:97550759

chr12:97550599-97550932

Overlap Length: 14 INS size: 309 Genotyped: Yes

```
left  TGT-----AAGAATAAGCAGTGGGAAGTACACTGACTGTGGTCATTTACACTTGGCTTCAACATCA
chrom TGTTCCTCTACTGTAAGAATAAGCAGTGGGAAGTACACTGACTGTGGTCATTTACACTTGGCTTCAACATCA
right TTT-----AGTAGA-----GACGG-GGT--TTCAC-CTTG---TTAGC--CA
*1*          111111111111***1**1111111111***1*1***11**1**1***111*1*1*11**
```

```
left  GTGACAAACTAGAAATGATGGAGACTATGAAAATTTGTTACTAATGCCTCTCA---TTCAGGGGTTTCATTC
chrom GTGACAAACTAGAAATGATGGAGACTATGAAAATTTGTTACTAATGCCTCTCA---TTCAGGGGTTTCATTC
right G-GATGGTCTCGATCTCCTGACCTC-ATGATCCACCCGCTCG-GCCTCCCAAAGTGCTGGGATTACAGG
*1**11111**1**11*11**11111*1***1111111111**111*****1**111*1*1***1**11111
```

```
left  AATAATCTACTTTGGCTGAAAATGTAGGACCAGTTT*****
chrom AATAATCTACTTTGGCTGAAAATGTAGGACCAGTTT*****
right CGTGAGCCACCGCGCCCGGCC--GTAGGACCAGTTT*****
11*1*1*1**111*1*1*11111*****222222*2*22*****222*2**2*2***2222
```

```
left  ----GTCTCGCTCTG---TCGCC-CAGGCCAGACTGCGGACTGCAGTGGCGCAATCT-----
chrom TTAGGTTTCTATGGGAAAATCTCTTCATTTTAAACTTTGGATCTAATTAACAACAACAATCAAATAAAAATA
right TTAGGTTTCTATGGGAAAATCTCTTCATTTTAAACTTTGGATCAAATTAACAACAACAATCAAATAAAAATA
2222**2**22*22*222**2*22**2222*2***22***22N2*2*N222***2*22222222222222
```

```
left  CGGCT-----CACTGCA--AGCTCCACT---TCCTGGGTTACGCCATT-----
chrom CAGCTGTGCTAAACATAGCAGAAGTTTAGCTCTGTCCAAGGCTCATGAGTTTGCAGCC
right CAGCTGTGCTAAACATAGCAGAAGTTTAGCTCTGTCCAAGGCTC-----
*2***22222222**22***22**2*222**222***22**2**1N1NNN11
```

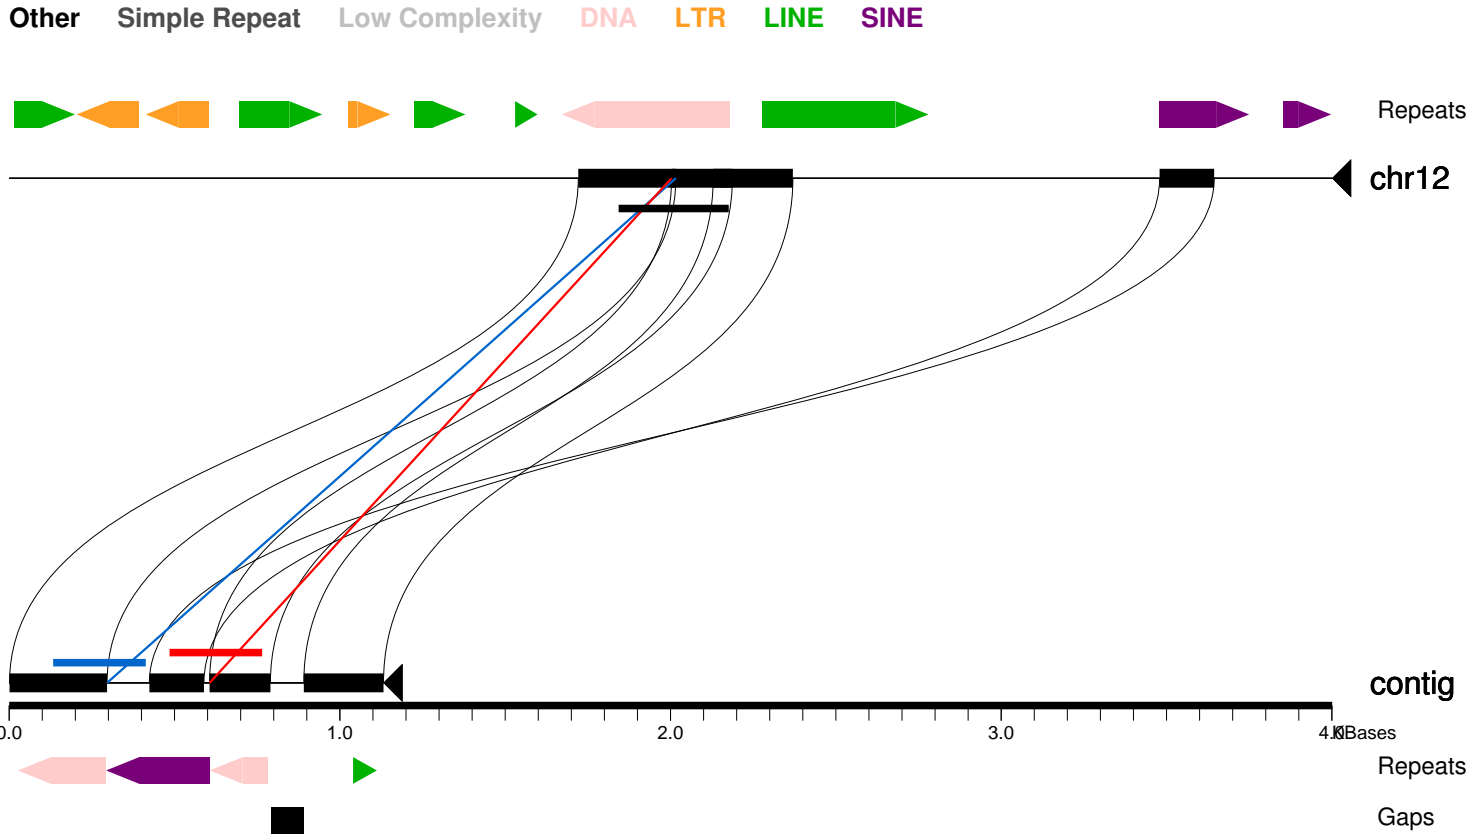



siteID: chr12\_987941 Scaffitg1 + Breakpoint: chr12:987954

chr12:987794-988120

Overlap Length: 7 INS size: 300 Genotyped: Yes

```

left   ATTGATGTA---ACAGGTATTAGAAATAACAGGTTAA--ATAAAGGTGCTCTGGTAACTGAACCTATGAC
chrom  --TGATGTA---ACAGGTATTAGAAATAACAGGTTAA--ATAAAGGTGCTCTGGTAACTGAACCTATGAC
right  --TTTGTAGAGACGGGGTTTC-----ACCTTGTAGCCAGGATGGT-CTCGATCTCCTGACCTCATGAT
      22*111***111**1**11**111111*1*11****111*11*1***1***111111****1*11****1

```

```

left   ATTCCCTAGAATTGTGTGTCAGCTATGT-CTGATATTCTAGGTTTGAAACTATGCTTTTATTTTCATGTAGAT
chrom  ATTCCCTAGAATTGTGTGTCAGCTATGT-CTGATATTCTAGGTTTGAAACTATGCTTTTATTTTCATGTAGAT
right  CCACCC--GCCTCGGCCTCCCAAAGTGCTGGGATTACAGGCGTGAGCCACCGC-----
      111***11*11*1*111111*1*1**1***11***11***11***11*111**111111111111111111

```

```

left   TTCTGCACTGTTTAAATGTGTGGAATGTTTTTTTTTTTTTTTTTTTT-----TGAGACGGAGTC
chrom  TTCTGCACTGTTTACTGTGTGGAATGTTT*****CTTAAGTAGTCCTCCTAATCACTTGAGAAGTACCC
right  ----GCCCGCCT-----T*****CTTAAGTAGTCCTCCTAATCACTTGAGAAGTACCC
      1111**1*1*11*1N11111111111111111111*****2**222*22*222222222222*****2*2*22*

```

```

left   TC-----GCT---CTG--TCGCCAGGTCGGACTGCG-----GACTGCAGTGCGCAA-TCTCGG
chrom  TGTAGAAGGTATGCTTTTTCTGAATGACCTTTTTTCAACTTTATTTTTGAGTACTGTTGTGCATGTATGTG
right  TGTAGAAGGTATGCTTTTTCTGAATGACCTTTTTTCAACTTTATTTTTGAGTACTGTTGTGCATGTATGTG
      *22222222222***222***22*22**2222*222***22222222**2*2*2**2*2***22*2*22*

```

```

left   CTCACTGCAA-GCTCCGCT-----TCCCGGGTTC----ACGCCATTCTCCT---
chrom  CACAGTGTATTGTTACCCTAATATTTTCATCACATCTGAGATGCTATCAACTTTAA
right  CACAGTGTATTGTTACCCTAATATTTTCATCACATCTGAGATGCTATC-----
      *2**2**2*22*2*2*2**222222**222222**2222*2**2**2NN1N1

```

Other    Simple Repeat    Low Complexity    DNA    LTR    LINE    SINE

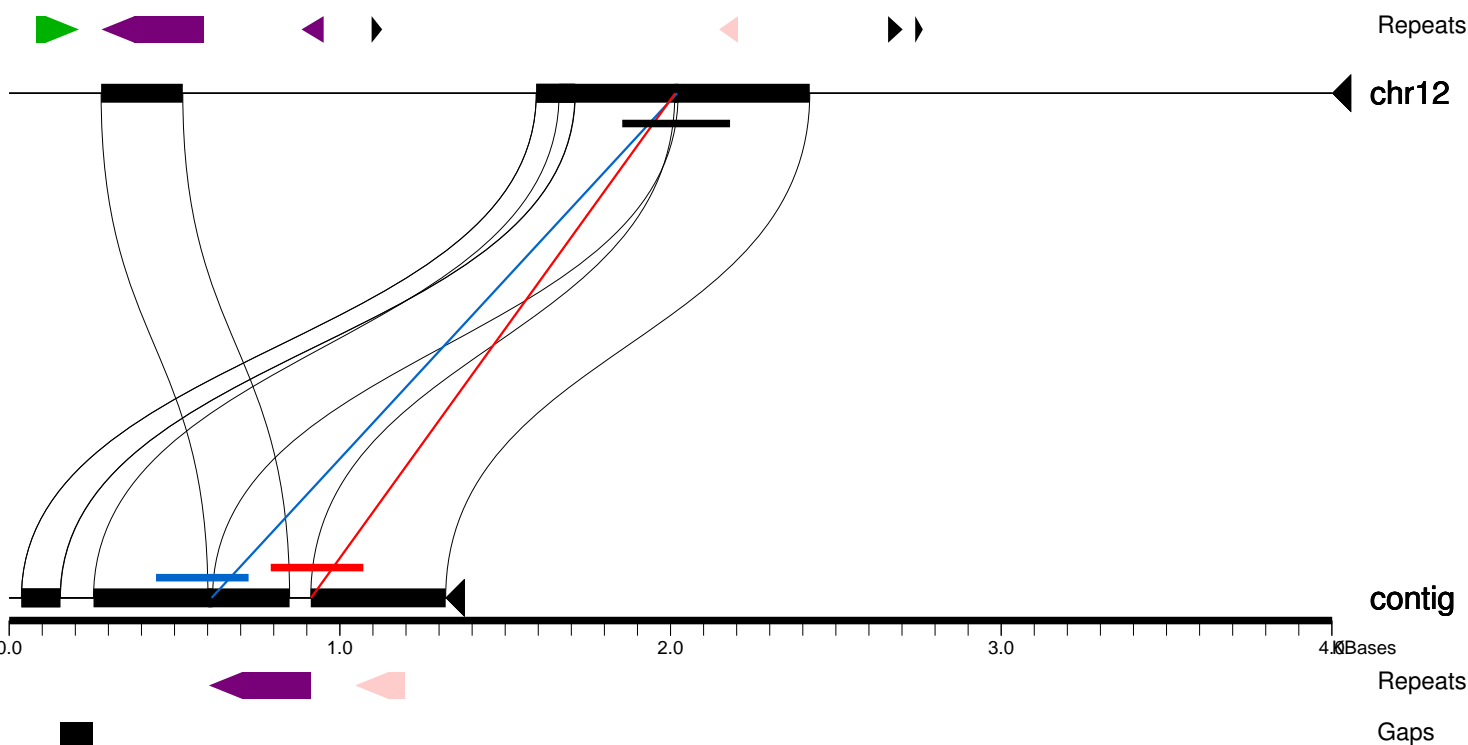

siteID: chr12\_9903071 Scaffitg1 - Breakpoint: chr12:9903052  
 chr12:9903007-9903111  
 Overlap Length: 15 INS size: 375 Genotyped: No

```

left  TTACAAATAGACCACGAATTCCACAAG-----GCCAG--TTGCCATGCGGAA---TTTGCTGAGTA
chrom TTACAAATAGACCACGAATTCCACAAG-----GCCAG--TTGCCATGCGGAA---TTTGCTGAGTA
right AGCCGGGATGGTCTTGTATCTCTGACCTCGTGTATCCGCCCGCTCGGCCTCCCAAAGTGT*TTTGCTGAGTA
      111*11111*11*11**11***11*11111111111***1*11*1*1*1*1*11**111*****
left  TTTT*TTNNNNNNNNNNNNNNNNNNNNNNNNNNNNNNNNNNNNNNNNNNNNNNNNNNNNNNNNNNNNNN
chrom TTTT-----AACTCTGGTGTCCACCATAGTAGTAGGTGCTTACTTATAACTTGT
right TTTT-----AACTCTGGTGTCCACCATAGTAGTAGGTGCTTACTTATAACTTGT
      ***2222222222222222222222222222222222222222222222222222222222222222
  
```

Other Simple Repeat Low Complexity DNA LTR LINE SINE

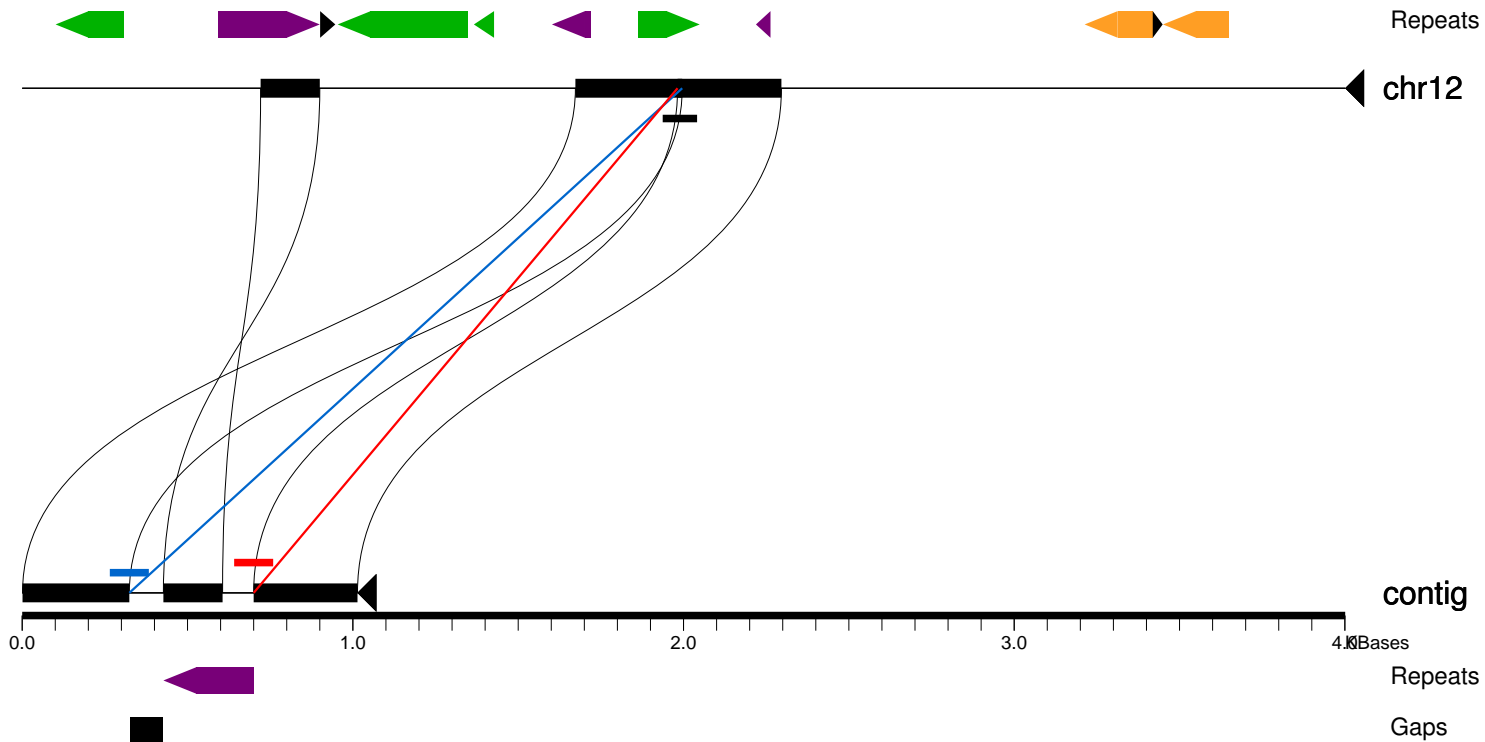





siteID: chr13\_101577225 Scaffitg1 + Breakpoint: chr13:101577234

chr13:101577074-101577404

Overlap Length: 11 INS size: 301 Genotyped: Yes

left A----GGAATAGTGGGAGTTAAGACATTTTTA---ATAATGG-CTTTATCTCTTC-CATCCCCCTCCTTT  
chrom ATATAGGAATAGTGGGAGTTAAGACATTTTTA---ATAATGG-CTTTATCTCTTC-CATCCCCCTCCTTT  
right TT-TAGTAG-AGACGGGGTTTC-ACCGTGTTAGCCAGGATGGTCTCGATCTCCTGACCTCGTGATCCGCC  
12 22\*1\*11\*\*11\*\*1\*\*\*111\*\*11\*1\*\*\*111\*11\*\*\*1\*\*11\*\*\*\*\*1\*11\*1\*\*1111\*\*\*111

left TGCTAAAAAATGTAAAAATCTGTGAGAGCAAAGCAAAGTGCACCTTTAAGAAATATTGAGTGCTAAAAATG  
chrom TGCCAAAAAATGTAAAAATCTGTGAGAGCAAAGCAAAGTGCACCTTTAAGAAATATTGAGTGCTAAAAATG  
right CGCC-----TCGG-----CCTCCCAAAGTGC----TGGGATTACAGGCGTG-----AGCC  
1\*\*2111111111111111\*\*1\*1111111\*1111\*\*\*\*\*1111\*11\*\*111111\*1\*\*\*11111\*111

left ACCTTTTTCATTTATTTAACCATAAGCAATTTTTT-----TTTTTT-----TTTT-----TTT  
chrom ACCTTTTTCATTTATTTAACCATAAGCAATTTCTTTTCAGCTATTCTTAGGACTCATTTTTAGTCTGCTTT  
right ACCGCGCCCGG-----CCA---GCAATTTCTTTTCAGCTATTCTTAGGACTCATTTTTAGTCTGCTTT  
\*\*\*11111\*11111111111\*\*111\*2\*\*\*2\*\*\*2222\*2\*\*2\*2222222\*\*\*\*\*222222\*\*\*

left TTTTG-----AGACGGAGTCTCGCTCTGTCTGCCAGGCT----GGAGTGCAGTGGCGCG--ATCTCGGC-  
chrom ATTAGCTGGAAAGCAGAGACT-GCT-TGTTGAAGAAGCTAACAGTAGGTTAGTATTGCAGAATCTTTTAA  
right ATTAGCTGGAAAGCAGAGACT-GCT-TGTTGAAGAAGCTAACAGTAGGTTAGTATTGCAGAATCTTTTAA  
2\*\*2\*22222\*22\*2\*\*\*2\*\*2\*\*\*2\*\*\*2\*222\*2\*\*\*2222\*2\*\*222\*\*\*222\*222\*\*\*2222

left ---TCACTGCAAG---CTCCGCCCTCC-----GGGTTACGCCATTCTCCTG  
chrom ATGTCACTGGAAGGCATCTAAAACTACAAAAAATTTTAGGATACATTATATAAAAAACC  
right ATGTCACTGGAAGGCATCTAAAACTACAAAAAATTTTAGGATACAT-----  
222\*\*\*\*\*2\*\*\*2222\*2222\*2\*2222222222\*\*2\*2\*\*2NNN11NNNN1NN

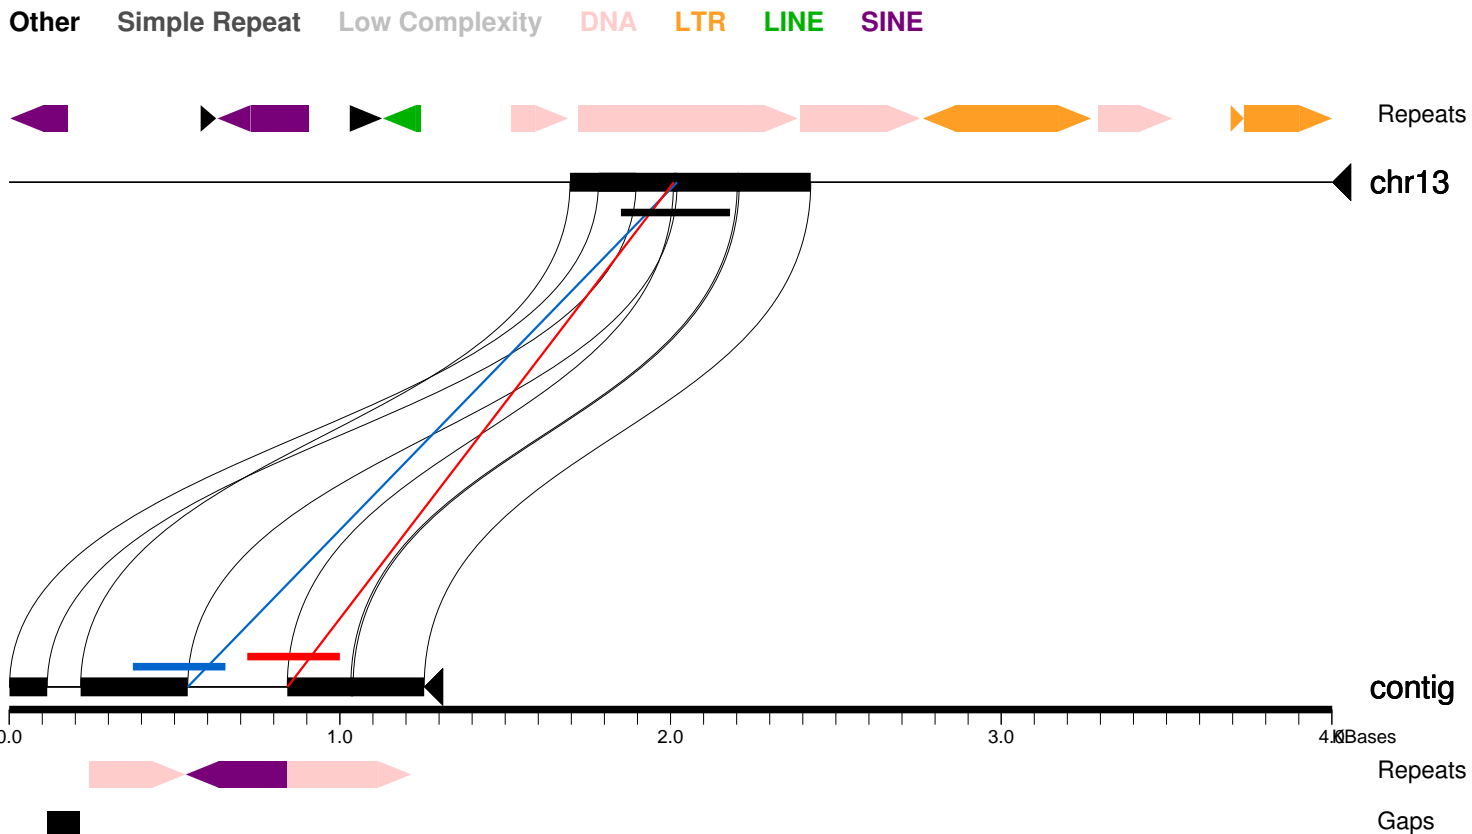



siteID: chr13\_105714939 Scaffold13 + Breakpoint: chr13:105714921

chr13:105714878-105714980

Overlap Length: 17 INS size: 271 Genotyped: Yes

```
left  ACTTGCTAAA----TAAAAAGCTGAAGGCTTCCT-ATCTGACAAATTT-----GACTTTGCTGC
chrom  ACTTGCTAAA----TAAAAAGCTGAAGACTTCCT-ATCTGACAAATTT-----GACTTTGCTGC
right  GTTAGCCAGGATGGTCTCGATCTCCTGACCTCATGATCTACCCGCCTCGGCCTCCCAAAAGACTTTGCTGC
      11*1**1*111111*1111*1**111*2*1**1*1****11*1111*111111111111******
```

```
left  TGTTTTTTTTTTTTTTTT---TTTTTTTTGAGACGGAGTCTCGCTCTGTTCGCCAGGCCGGACTGCGG
chrom  TGTTTTATATGCTAGCATAAAATTTATTGTTAAAAACA-TTTCAATATT-----GT
right  TGTTTTATATGCTAGCATAAAATTTATTGTTAAAAACA-TTTCAATATT-----GT
      *****2*2*22*2222*222***2**2*2*2*222*2*2**22*2*2222222222222222*2
```

Other Simple Repeat Low Complexity DNA LTR LINE SINE

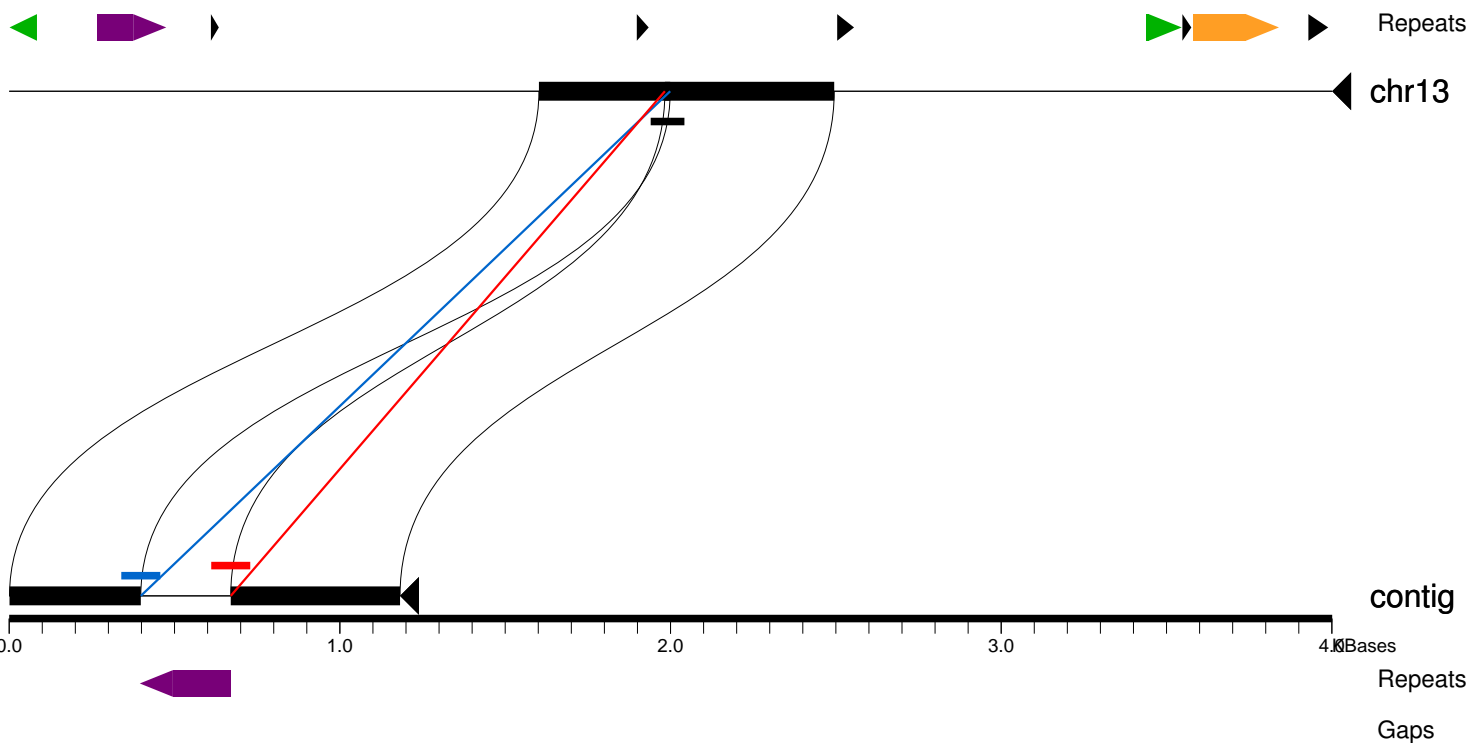

siteID: chr13\_108669033 Scaffitig4 - Breakpoint: chr13:108669013

chr13:108668971-108669072

Overlap Length: 18 INS size: 304 Genotyped: Yes

```
left  C-----TTCTGAG---CAG-GCAAAACA-----TAATTAAAGGTCAAACCTGGTTTAAAGTATGTTC
chrom C-----TTCTGAG---CAG-GCAAAACA-----TAATTAAAGGTCAAACCTGGTTTAAAGTATGTTC
right CACTCCAGCCTGGGCGACAGAGCGAGACTCCGTCTCAAAAAAAAAAAAAAAAAAAAAAAAAAAAGTATGTTC
      *111111111***1*111***1**1*1**111111111**11***1111***111111111*****
```

```
left  TAATCTGGGCCGGGCGCGGTGGCTCACGCCTGTAATCCAGCACTTTGGGAGGCCGAGGCGGGCGG
chrom TAATCTGATCGTTAGGCAGTTTGTCTCCAGTGGATG---AGCATTCTTGCAC-----
right TAATCTGATCGTTAGGCAGTTTGTCTCCAGTGGATG---AGCATTCTTGCAC-----
      *****22*22222**2**222**2*222**2*22222*****2*2*2*2*222222222222222
```

Other Simple Repeat Low Complexity DNA LTR LINE SINE

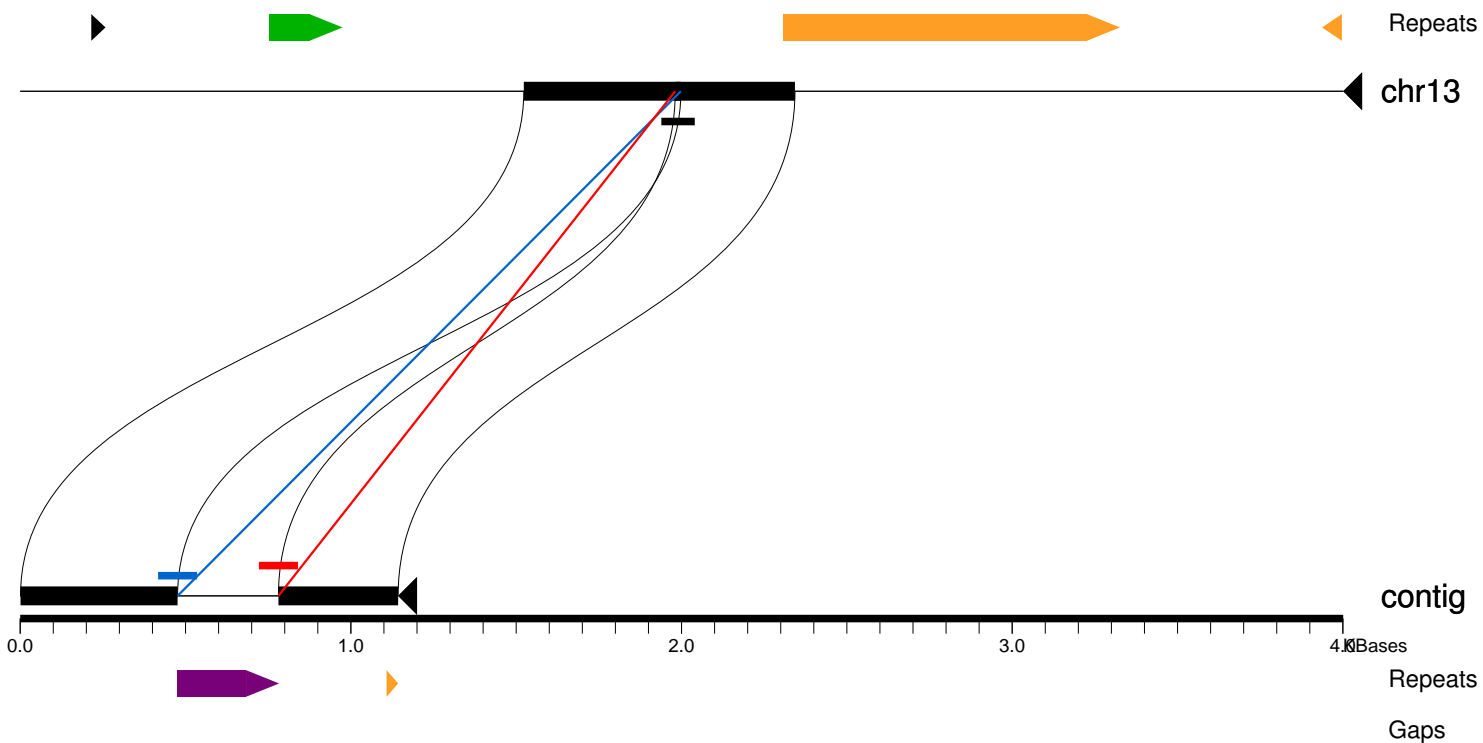



siteID: chr13\_111076815 Scaffoldig11 + Breakpoint: chr13:111076796

chr13:111076752-111076855

Overlap Length: 16 INS size: 305 Genotyped: Yes

```
left  -----ATTGGA-----AAATTTTTTA---TACTGAAATGACCTTAAAAAGAACCCAAATAAGTTAAT
chrom -----ATTGGA-----AAATTTTTTA---TACTGAAATGACCTTAAAAAGAACCCAATAAGTTAAT
right CCGCCCGCCTCGGCCTCCCAAAGTGTGGGATTACAGGCGTGAGCCACCGCGCCCGGCCAATAAGTTAAT
      111111111*1**111111***1*11*11111***1*111***1*111111111111*1*****
```

```
left  TCTTTTTTTTTTTTTTTTTTTTTTTTTTTTTTGGAGACGGAGTCTCGCTCTGTGCGCCAGGCTGGAGT
chrom TCTTTCATCCCAACCCAGTATTATCATTTTCAATGA-----CATGACTTTAGT
right TCTTTCATCCCAACCCAGTATTATCATTTTCAATGA-----CATGACTTTAGT
      ****22*2222222222*2**2*22***2*2*22**22222222222222*22*2**22**
```

Other Simple Repeat Low Complexity DNA LTR LINE SINE

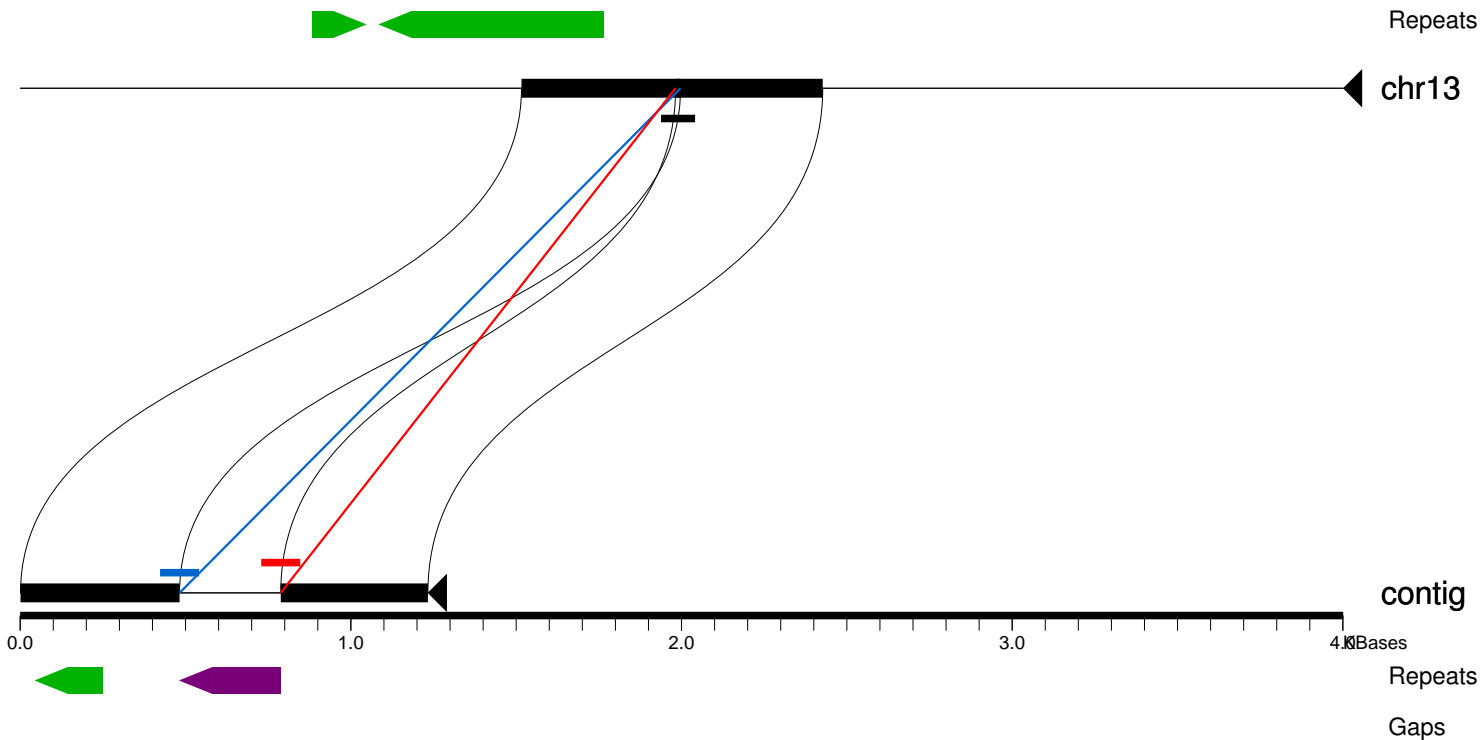





siteID: chr13\_113520966 Scafflig2 + Breakpoint: chr13:113520954

chr13:113520794-113521127

Overlap Length: 14 INS size: 300 Genotyped: Yes

```
left      -----CCGGTGGGGCCCTGTGCTTCCTGAGAGAGCCACACCAGGCATTCGGTAGATGTCAGAGAC
chrom    TGTGGGAGGCCCGGTGGGGCCCTGTGCTTCCTGAGAGAGCCACACCAGGCATTCGGTAGATGTCAGAGAC
right    TTTAGTAGAGACGAGGTTTCACCGTTTTAGCCGGGATGGTCTCGA-----TCTCCTGACCTC-GTGAT
          2N2N2N22NN1**11*111*1*1**11*11*1*1**11*1*1*111111111**1111**11**1*1**1
```

```
left      CATCCCTGCTTAAATGCCTCAGGTATTTAACTAGCCGTACAAGCAGACACCAGCGCTGACCTCGGAGAAA
chrom    CATCCCTGCTTAAATGCCTCAGGTATTTAACTAGCCGTACAAGCAGACACCAGCGCTGACCTCGGAGAAA
right    CCGCCCGCCTCG---GCCTCCCAAAGTG--CTGGGATTACAGGCGTGAGCCACCGCG---CCCGG-----
          *11**11**11111*****1111*1*111**1*111*****1**11111**1**1111*1**11111
```

```
left      GTCCCTCTTCAGCAGCCCTTCTGGGTGACTTCTT-----TTTTTTTTTTTTTTTTTTTGGAGACGGAG
chrom    GTCCCTCTTCAGCAGCCCTTCTGGGTGACTTCTTAAACAGAAATCGGCTTCGTTCCCTTGTGTTAGCCTGAC
right    -----CCTCTGGGTGACTTCTAAACAGAAATCGGCTTCGTTCCCTTGTGTTAGCCTGAC
          1111111111111111111*1******1*22222222*2222**22**22**2**2**2*2**2
```

```
left      -TCTCGCTC-----TGTCGCCCAGGCTG--GAGTGCAGTGCGGGATCTCGGCT-----CACT
chrom    CTCTCTCTCCCTGTGTGTTTGTCCCTCAGACTGCTGGGTTCAAACACAAAAGTCCCTGCTATGTGTCCTGT
right    CTCTCTCTCCCTGTGTGTTTGTCCCTCAGACTGCTGGGTTCAAACACAAAAGTCCCTGCTATGTGTCCTGT
          2****2***222222222****2*2***2***22*2**2*2222*222*222*2***2222222*22*
```

```
left      GCAAGCTC---CGCCTCC-----CGGGTTCACGCCATTCTCCT-----GCC--T
chrom    GCACCATT---TACCTGCTTTAGTCGTTTTTCATTCCCTTTACTAAAACACTGCTGTT
right    GCACCATTATTTACCTGCTTTAGTCGTTTTTCATTCTCCTT-----
          ***222*211122***2*222222**22****22**22*21N11           11N 1
```

Other Simple Repeat Low Complexity DNA LTR LINE SINE

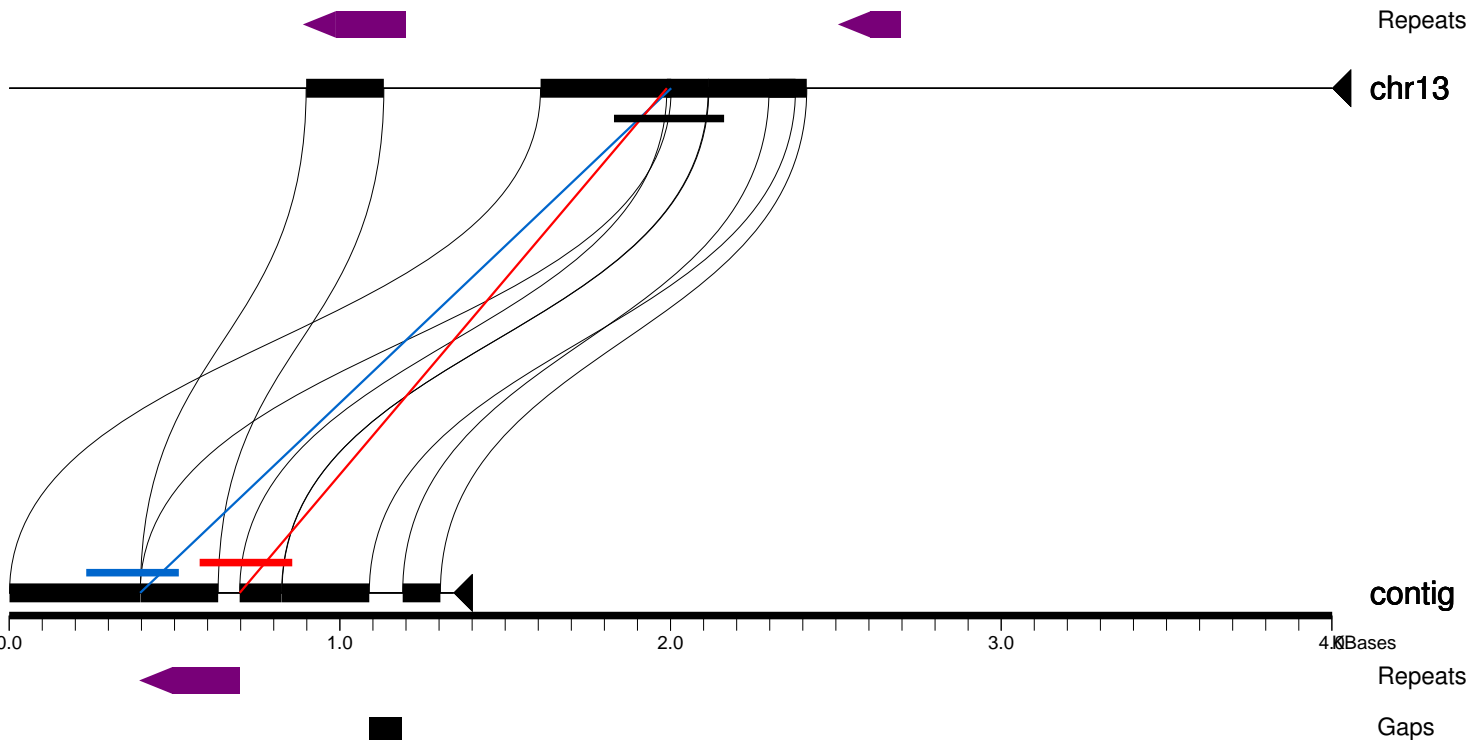

siteID: chr13\_114881995 Scaffitg1 - Breakpoint: chr13:114882006

chr13:114881846-114882181

Overlap Length: 16 INS size: 307 Genotyped: Yes

```

left -----GCATTCTGAGGAATCCGAAAGACTCCAGCGTAGGACAGACCGCTGTTCCAAGCC
chrom TTTTCATAAACATGCCGCATTCTGAGGAATCCGAAAGACTCCAGCGTAGGACAGACCGCTGTTCCAAGCC
right -----AGAATGGCGTGAACCCGGGAAGCGGA--GCTTGCAGTG-AGCCGAGATTGCG---CCACTGC
                2NN222N2*1111*111****1*1**11*11*1***1*1**111***11**1111***111*
  
```

```

left ACTGGGAAAGGGGAAACTGGTGACTGAGCG-GCGCCCGTCAGAGCCATTAAAAACGTGAGGGAAAAACTGCA
chrom ACTGGGAAAGGGGAAACTGGTGACTGAGCG-GCGCCCGTCAGAGCCATTAAAAACGTGAGGGAAAAACTGCA
right AGTCCGCAGTCCGGCCTGGGCGACAGAGCGAGACTCCGTCTCA---AAAAAAA-----AAAA-----
                *1*11*1*1111*11111**1***1*****1*111*****11*111*11****11111111****11111
  
```

```

left CCTTACGGCACACGAACCCCTTAGAAGAGGCAAAAACACGGCCGGGCGCGGTGGCTCACGCCT--GTAATCC
chrom CCTTACGGCACACGAACCCCTTAGAAGAGGCAAAAACACTACTGAGTTAA-TGCTTAATTTATTTGTAATGA
right -----AAAAAAA-----AGAAGAGGCAAAAACACTACTGAGTTAA-TGCTTAATTTATTTGTAATGA
                1111111111*1*11**11111***********22*2*2*22222*22*2*2222*22*****22
  
```

```

left CAGCACTTTGGGAGGCCGAGGCGGTGGATCATGAGGTCAGGAGATCGAGACCATCCTG-----GCT
chrom TAAAAGTTTTTATCACTTTAAAATAAAGTTATTTGAAAAAAGTTATTCAATGGCAGCCTAATAATTTTGTCT
right TAAAAGTTTTTATCACTTTAAAATAAAGTTATTTGAAAAAAGTTATTCAATGGCAGCCTAATAATTTTGTCT
                2*22*2***222222*2222222222*22222***2222*2222**2*222**2***2222222222***
  
```

```

left -----ACAAGG-----TG-AAACCCGTCCTACTAAA-----
chrom TAATGAAAAATTAACCTCTGCAAATACAGTTTCCACTATTACATGGAGCCTGCAGGTT
right TAATGAAAAATTAACCTCTGCAAATACAGTTTCCACTATTACATGG-----
                22222*2**222222*2**2**2*2**2**2***22222222
  
```

Other Simple Repeat Low Complexity DNA LTR LINE SINE

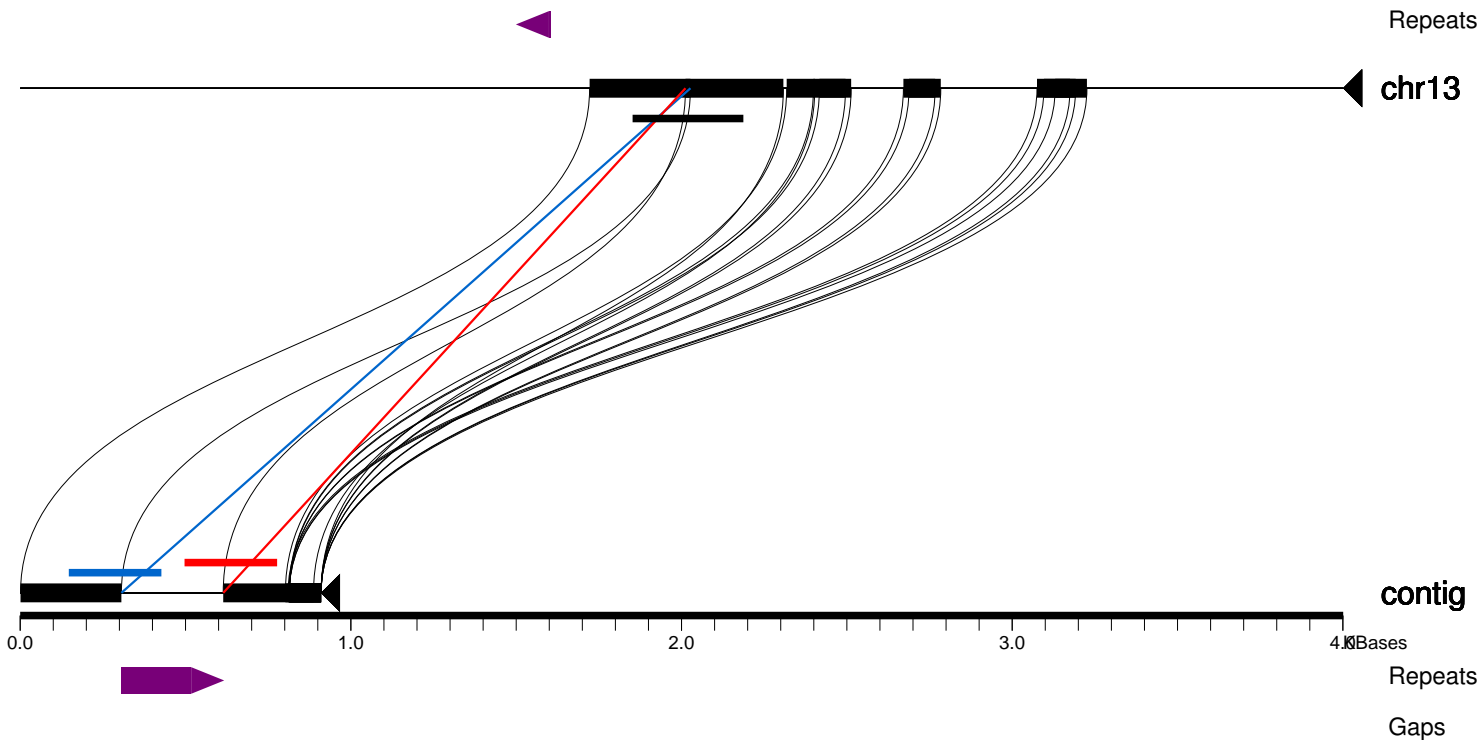

siteID: chr13\_21894779 Scafftig1 + Breakpoint: chr13:21894765

chr13:21894605-21894938

Overlap Length: 14 INS size: 271 Genotyped: Yes

```

left -----GCACCCCTCTTGAAGAAGCTGAACTTCAAGCGGGTGGGAGCCGGCATGCTGGAGC
chrom CGAAGTGAAGG--AGCACCCCTGTTGAAGAAGCTGAACTTCAAGCGGGTGGGAGCCGGCATGCTGGAGC
right C-AGGCGCCCGCCACCGCGCCCGGCT-AATTTTTTTGTATTTTTTAGTAG-----AGACGGGGT-----
      2 2N2N2NNN21121*1*1***121*1**11111**1*1**11**11*11111**1***11*111111111

left CGCCCTTCAAGCCTGACCCTCGGGCCATTTACTGCAAGGATATTCTGGACATTAAACAGTTCTCTAGGGT
chrom CGCCCTTCAAGCCTGACCCTCGGGCCATTTACTGCAAGGATATTCTGGACATTAAACAGTTCTCTAGGGT
right ----TTCA-----CCTTG-----TTA--GCCAGGATGGTCTCGATCTC---CTGACCTCATGATC
      11111***11111111***1*111111***11**1***11***1**11*11111*1*11***11*111

left CAAGGGTGTGGAGCTGGAGGCTACCGACCAAGACTTTTT-----TTT-----TTTTTTTTTT
chrom CAAGGGTGTGGAGCTGGAGGCTACCGACCAAGACTTTTTCTACCAGAAGTTTGCCACAGGCAGTGTGCCCATC
right CACCCGCCTCGGCCTCC---CAACCGACCAAGACTTTCTACCAGAAGTTTGCCACAGGCAGCGTGCCCATC
      **111*11*1*11**11111*1*****11***1**22222222***222222222212*22222*2

left TTTTTTGAGACGGAG-TCTCG----CTCTGT-CGCCCAGGC-CAGACTGC----GGACTGCAGTGGCGCA
chrom CCCTGGCAGAAGGGGATGGTGGAGACTGAGTGCTTCCAGGAGCTGAATGTCTTTGGGCTGGA-TGGCTCA
right CCCTGGCAGAACGGGATGGTGGAGACTGAGTGCTTCCAGGAGCTGAATGTCTTTGGGCTGGA-TGGCTCA
      222*222***21*2*2*222*2222**22**2*22*****22*2**2*22222**2***2*2***2**

left AT---CTCGGCTC---ACTGCAAGCTCCG-----CTTCCCGGGTTACGCCATT--C
chrom GTTCCCCCAGACCTGGACTGGAAGGGCCAGCCACCTGCAAGGGACTGCTGCAGAGAC
right GTTCCCCCAGACTGGACTGGAAGGGCCAGCCACCTGCAAGGGA-----TTTT-----
      2*222*2*2*22*222***2***22**222222**2*22***2NNN1NN1NN 1

```

Other Simple Repeat Low Complexity DNA LTR LINE SINE

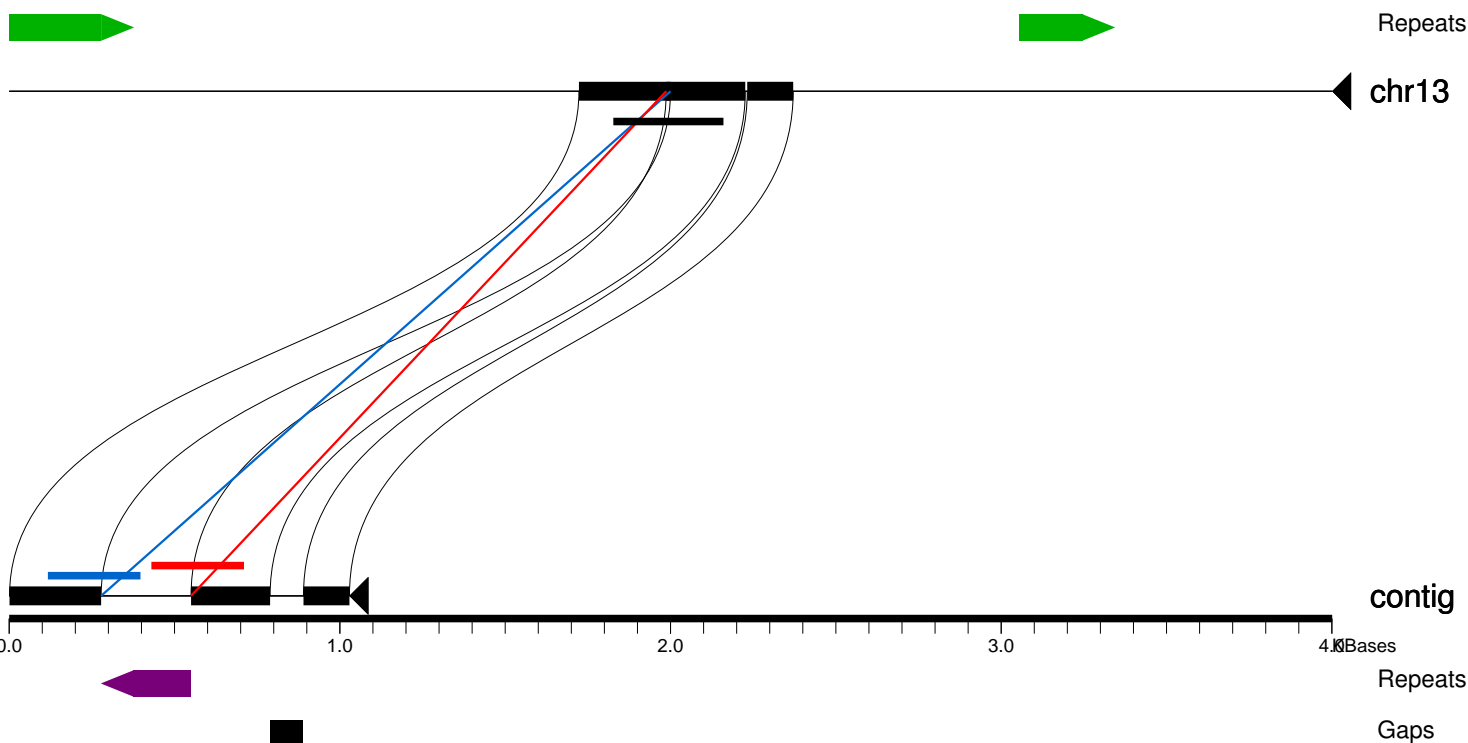

siteID: chr13\_22556635 Scafftig3 - Breakpoint: chr13:22556640

chr13:22556593-22556699

Overlap Length: 13 INS size: 228 Genotyped: Yes

```
left   GGGGCGACT----TGGGGCATACTCTCCGTACTGGGCATTTCTCTCGAGTT-----AAAAAGATCT
chrom  GGGGCGACT----TGGGGCATACTCTCCGTACTGGGCATTTCTCTCAAGTT-----AAAAAGATCT
right  GCGCC-ACTGCGGTCCGGCCTGGGGCGACAGAGCGAGACTCCGTCTCAAAAAAAAAAAAAAAAAAAAAA
*1*1*1***1111*11***1*111*11*11*11*1*11*111****2*1111111111111111*****
```

```
left   GCGGTCAGGAGATCGAGACCATCCTGGCTAA-CAAGGTGAAACCCCGTCTCTACTAAAAAT-AC
chrom  GCGTA----AGTTAAAGAGATTCATTGCACAGCATGGTGA-----CTACAGTTAATGAC
right  GCGTA----AGTTAAAGAGATTCATTGCACAGCATGGTGA-----CTACAGTTAATGAC
**222222**2*22***222**2*2**22*2**2*****2222222222*****2222**2**
```

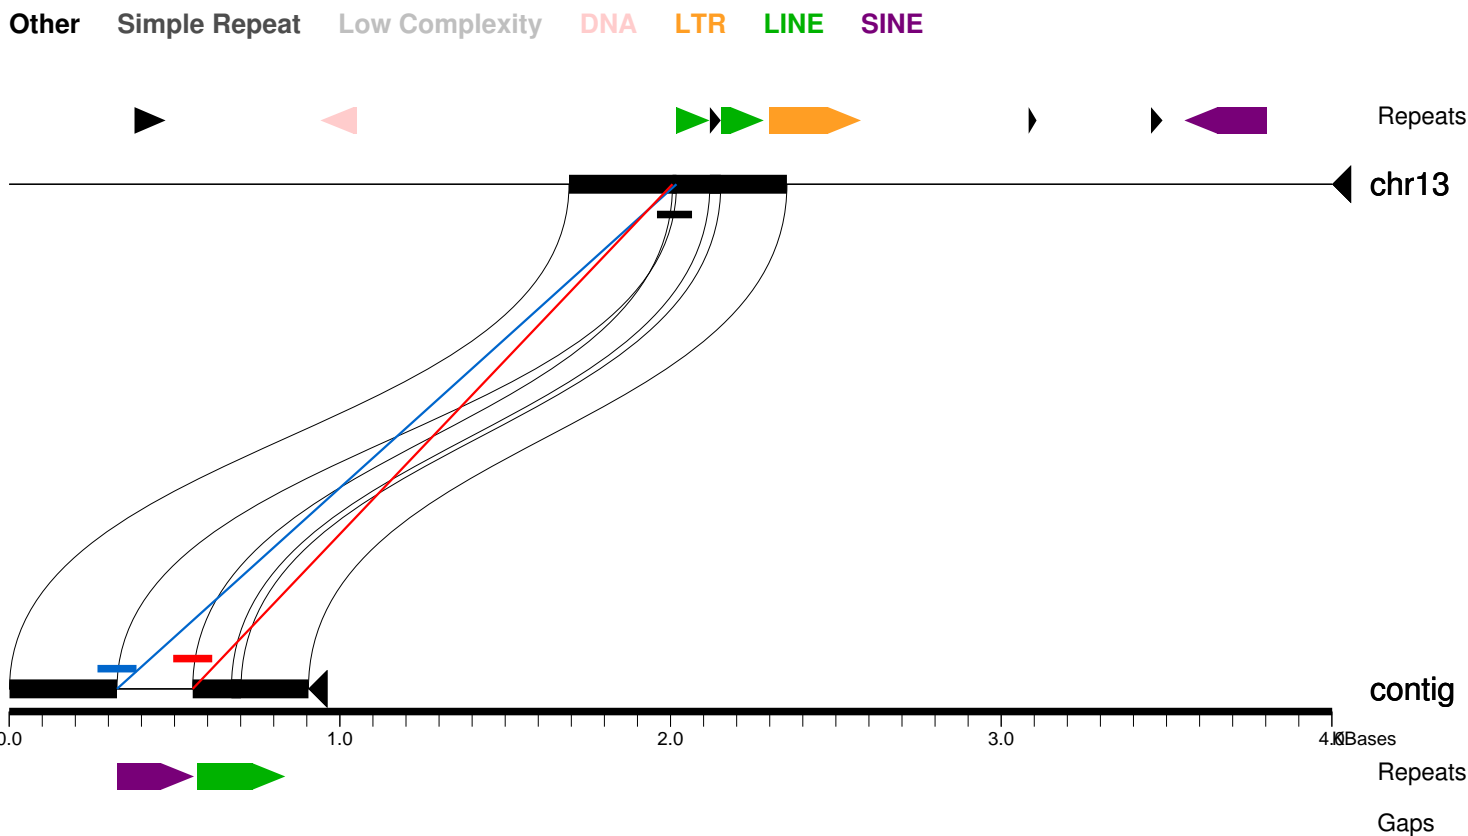





siteID: chr13\_27856030 Scafftig1 + Breakpoint: chr13:27855984

chr13:27855937-27856043

Overlap Length: 13 INS size: 410 Genotyped: No

```

left  TTGACAAAATATCTGGGCACCTCCATGGCTCAGTCAAGTTGACACATA-----AAATGAATAAT
chrom TTGACAAAATATCTGGGCACCTCCATGGCTCAGTCAAGTTGACACATA-----AATGAATAAT
right NNNNNNNNNNNNNNNNNNNNNNNNNNNNNNNNNNNNNNNNNNNNNNNNNNNNNNNNNNNNNNNNAAAAGAATAAT
      1111111111111111111111111111111111111111111111111111111111111111111111***1*****

left  CAGGCCGGGCGCGGTGGCTCACGCCTGTAATCCAGCACTTTGGGAGGCCGAGGCGGGCGG
chrom CATAT---GCAGTATGGGTTTTAGCTGCATT---ATCTCGTTGAATTCCCCAAC-----
right CATAT---GCAGTATGGGTTTTAGCTGCATT---ATCTCGTTGAATTCCCCAAC-----
      **222222**2222***2*22222***2*2*222*2*2*2***22222**2222*222222
    
```

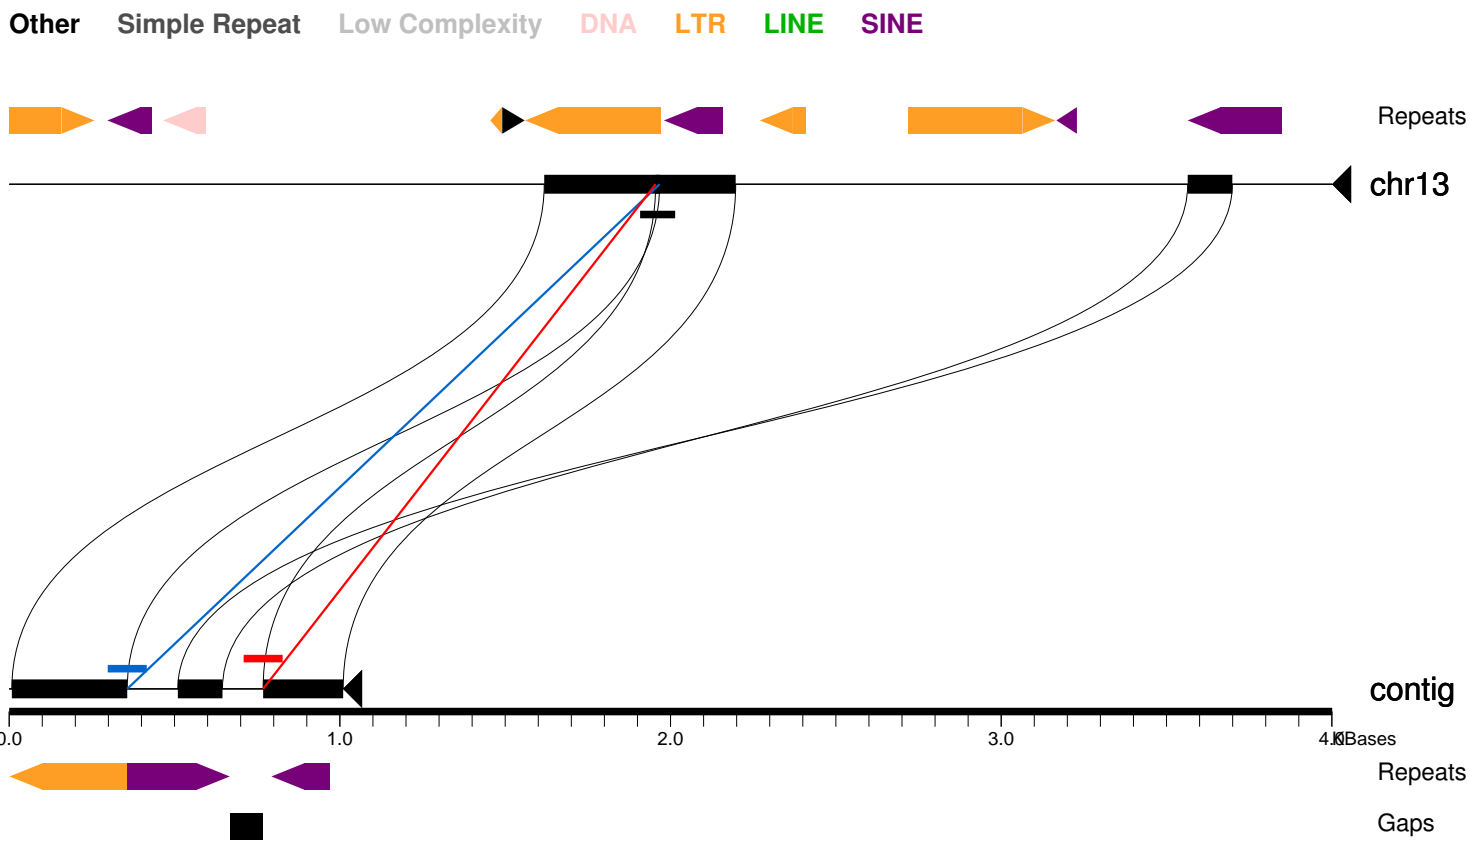

siteID: chr13\_29538897 Scafftig10 + Breakpoint: chr13:29538876

chr13:29538831-29538935

Overlap Length: 15 INS size: 305 Genotyped: Yes

```

left  GGGTCAGTGTTCAGTCT-----GT-CTGAGCTTT-AGTCATGTACAA-----GAAGCTTTTGTGT
chrom GGGTCAGTGTTCAGTCT-----GT-CTGAGCTTT-AGTCATGTACAA-----GAAGCTTTTGTGT
right CCGCCCCG--TTCGGCCTCCCAAAGTGCTGGGATTACAGGCGTGAGCCACCGCGCCCGGCCCTTTTTTGT
      11*1*1*111***1*1**111111**1***1*1**11**1*1**11*1*11111111*111*****2***

left  GTTTT*TTTTTTTTTTTTTTTTTTTTTTTTTTT*GAGACGGAGTCTCGCTCTGTCGCCAGGCTGGAGTGC-
chrom GTTTT*TAATGCCTGGGTCTTGGGTT----AGAAGAA-----CCCTAATGCCCAA-----AGTCCC
right GTTTT*TAATGCCTGGGTCTTGGGTT----AGAAGAA-----CCCTAATGCCCAA-----AGTCCC
      *****22*222*222*2**222**2222***2*2*222222*2**222*****222222***2*2
    
```

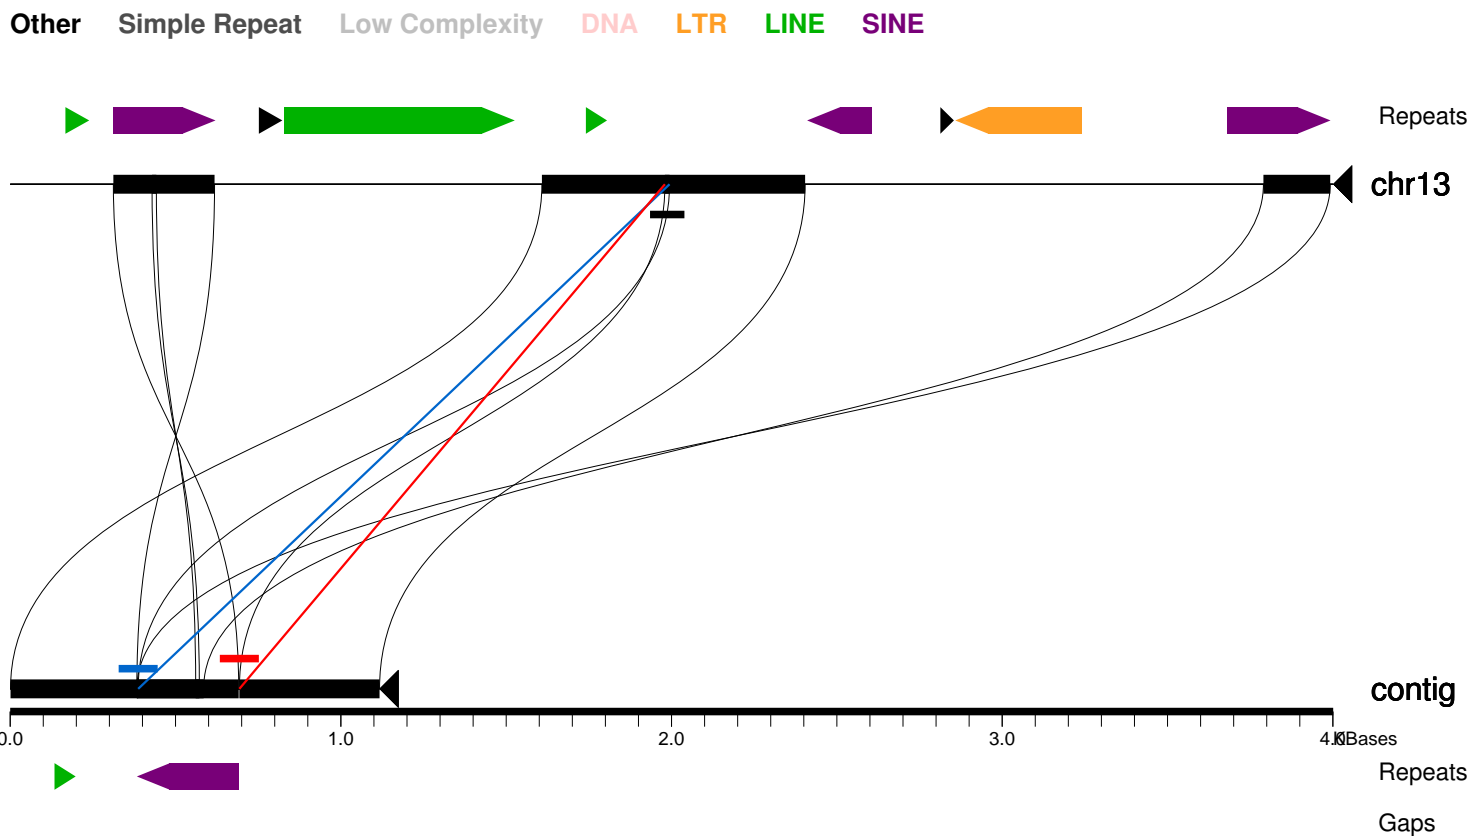



siteID: chr13\_31891942 Scaffig1 + Breakpoint: chr13:31892033

chr13:31891986-31892077

Overlap Length: 13 INS size: 129 Genotyped: Yes

```
left  AGAAC-----ACTC-AGT-----AAAGA---ATATTTTAGCCCTTGAAGAAATGATATAAA-----
chrom AGAAC-----ACTC-AGT-----AAAGA---ATATTTTAGCCCTTGAAGAAATGATATAAA-----
right ATCCCGCCACTGCCTCCAGCCTGGGCGACAGAGCGAGACTCCGTCTCAAAAAAAAAAAAAAAAAAAAAAAAAA
*111*111111111****1*111111111*1***111*1*1*1111*1*111**1***11*1*1***1111
```

```
left  ----AAAGTATGTCATAAGGCTGAGGCAGGAGAATGGCGTGAACCCGGGAGGCGGAGCTTGCAGTGAGCCG
chrom ----AAAGTATGTCATA--CT--TGCT--AGAATGTCCCTAACAATGG-----TTGC-----
right AAAAAAAGTATGTCATA--CT--TGCT--AGAATGTCCCTAACAATGG-----TTGC-----
1111******22**222**222*****2*222***222**222222222****222222222
```

```
left  AGATCC
chrom ---TTC
right ---TTC
222*2*
```

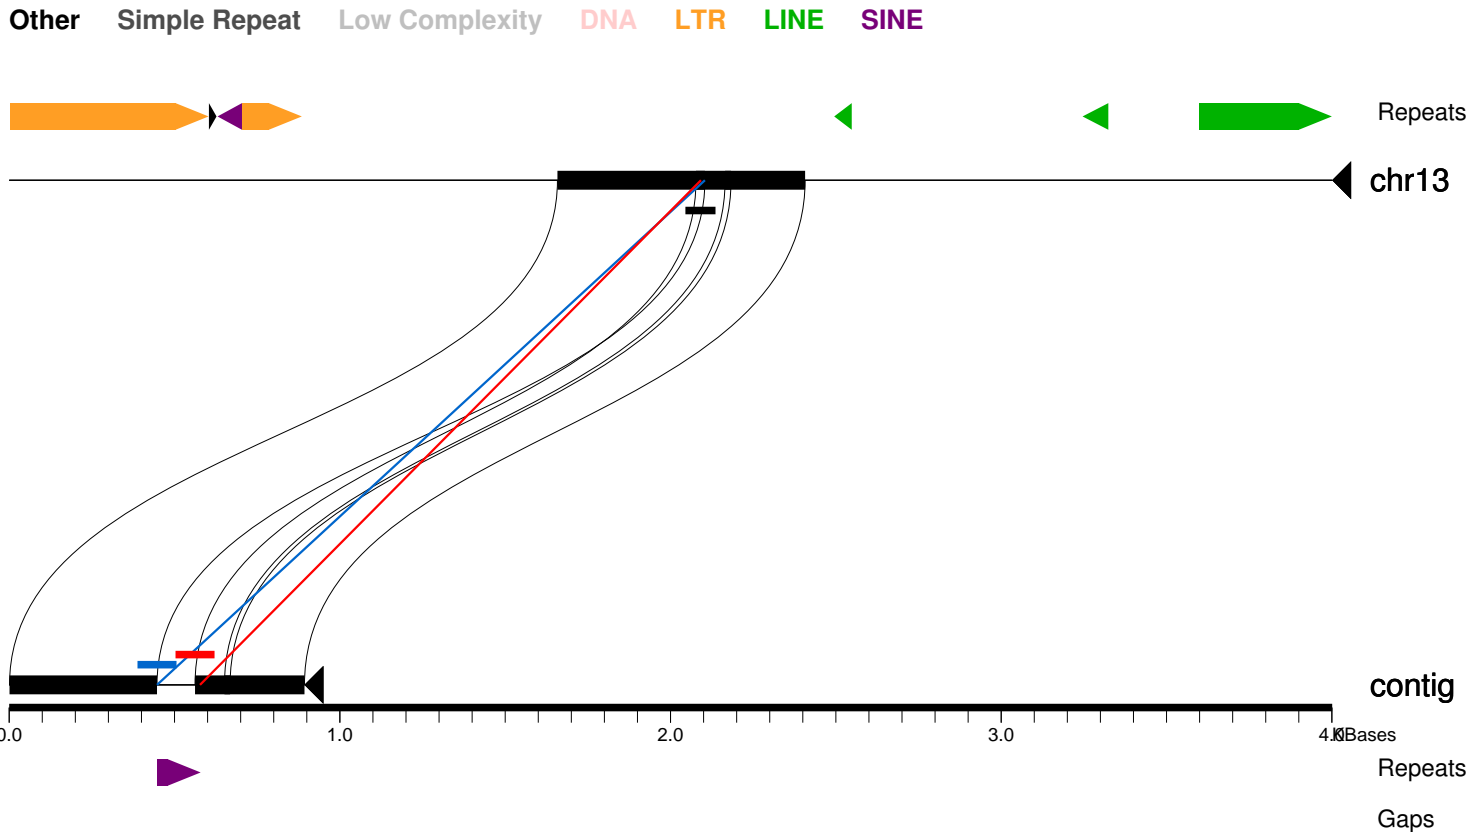

siteID: chr13\_32706403 Scaffig2 - Breakpoint: chr13:32706388

chr13:32706341-32706447

Overlap Length: 13 INS size: 311 Genotyped: Yes

```

left  T-----AAAGA-----AATCTGTTTATTCTTACTATAAAAAAGGAATCTTAATTTTTTAAAAACTCAG
chrom T-----AAAGA-----AATCTGTTTATTCTTACTATAAAAAAGGAATCTTAATTTTTTAAAAACTCAG
right GCCTGGGCGACAGAGTGAGACTCCGTCTCAAAAAAAAAAAAAAAAAAAAAAAAAAAAAAAAAAAAAA-AAAAAACTCAG
      111111111*1***11111*1**1*1*11111*11*1*****11*1111*11111*111111*****

```

```

left  CTAGGCCGGGCGCGGTGGCTCACGCCCTGTAATCCCAGCACTTTGGGAGGCCGAGGCGGG--CGG
chrom CTAAACAATACAGGTTTGTATA-----TTTATTGCC--CAGT-----GCCCATCATGGTACAT
right CTAAACAATACAGGTTTGTATA-----TTTATTGCC--CAGT-----GCCCATCATGGTACAT
      **22*2222*22*2*2*2*222222*2**2*2**22**2*222222***2*2222*22*22

```

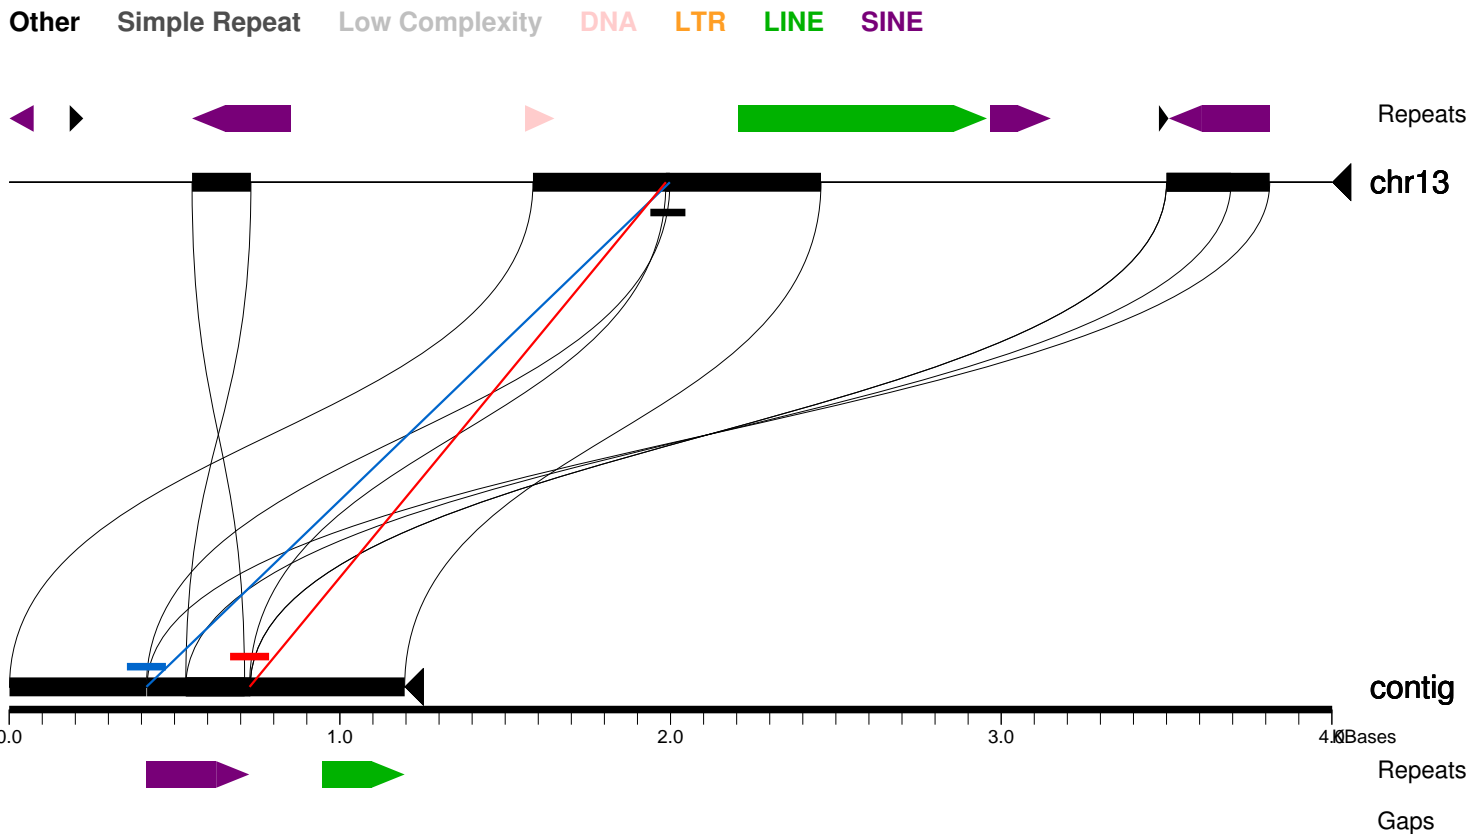

siteID: chr13\_32922420 Scaffitg2 - Breakpoint: chr13:32922439  
 chr13:32922279-32922601  
 Overlap Length: 1 INS size: 316 Genotyped: Yes

```
left  ---AAGAATCATGAAAAGTTCCCAGAATACAGAATAAAAAATGAAAAAAGGTATGAAAAGTCAATTTCTGTGGA
chrom TGGAAAGAATCATGAAAAGTTCCCAGAATACAGAATAAAAAATGAAAAAAGGTATGAAAAGTCAATTTCTGTGGA
right  ---AGAATGGTGTGAA--CCCGGGAGGCGGAGCT---TGCA-----GTG-----AGCCGA-----GA
      1*****11**11*111***1*1*11*1**111111**1*11111**111111**1*1*1111111**
```

```
left  TCTATCATCTGAAAATACAGAGTTTGAGAAGGAAGGCACAGAAGAGAAAATGAAGAAAAGAAAATTTTAAAAAT
chrom TCTATCATCTGAAAATACAGAGTTTGAGAAGGAAGGCACAGAAGAGAAAATGAAGAAAAGAAAATTTTAAAAAT
right  TCCCGCCACTGCAC-TCCAGCCTGGGCGACAGAGCG---AGACTCCGTCTCAAAAAAAAAAAAA---AAAAA
      **111*11***1*11*1***11*11*1**11**11*111**111111**1*1*1**1***1111***1
```

```
left  AAATACATAATTTTAAAAAGTTT-----GGCC-----GGGCGCGGTGG
chrom AAATACATAATTTTAAAAAGTTTCTACTAGTACTGAAGGACATGAGTTTCCTTAATTTAAAAGGGCCCACTGA
right  AAAAAAAAA---AAAAA-TTACTAGTACTGAAGGACATGAGTTTCCTTAATTTAAAAGGGCCCACTGA
      ***1*1*1**1111****11*N*222222222222**2*2222222222222222222222222222222222222**2*22**2
```

```
left  CT---CACGCCTGTAATCCAGCACTTTGGGAGGCCGAGGCGGGCGGATCACAGAGTTCAGGAGATCGAGA
chrom GTGAGCACACAAGTAAAAAATGACCCACAGTAAGGCACATCCTTGTGAATTTTGTGAATAATAGAGGCAGA
right  GTGAGCACACAAGTAAAAAATGACCCACAGTAAGGCACATCCTTGTGAATTTTGTGAATAATAGAGGCAGA
      2*222***2*22****222222*2*222*22****22*22*22*2*2*2**2222**222*22****222***
```

```
left  CCATCCCGGCTAAAACGGTGAA--ACCCGTCCTCTAC--TAAA
chrom CAGGAACCTTAAATTCATTAGAGGACCAAGAAGTTAGGTTTCA
right  CAGGAACCTTAAATTCATTAGAGGACCAAGAAGTTAGG-----
      *22222*2222**22*22*22*22**22*2222**22 1NN1
```

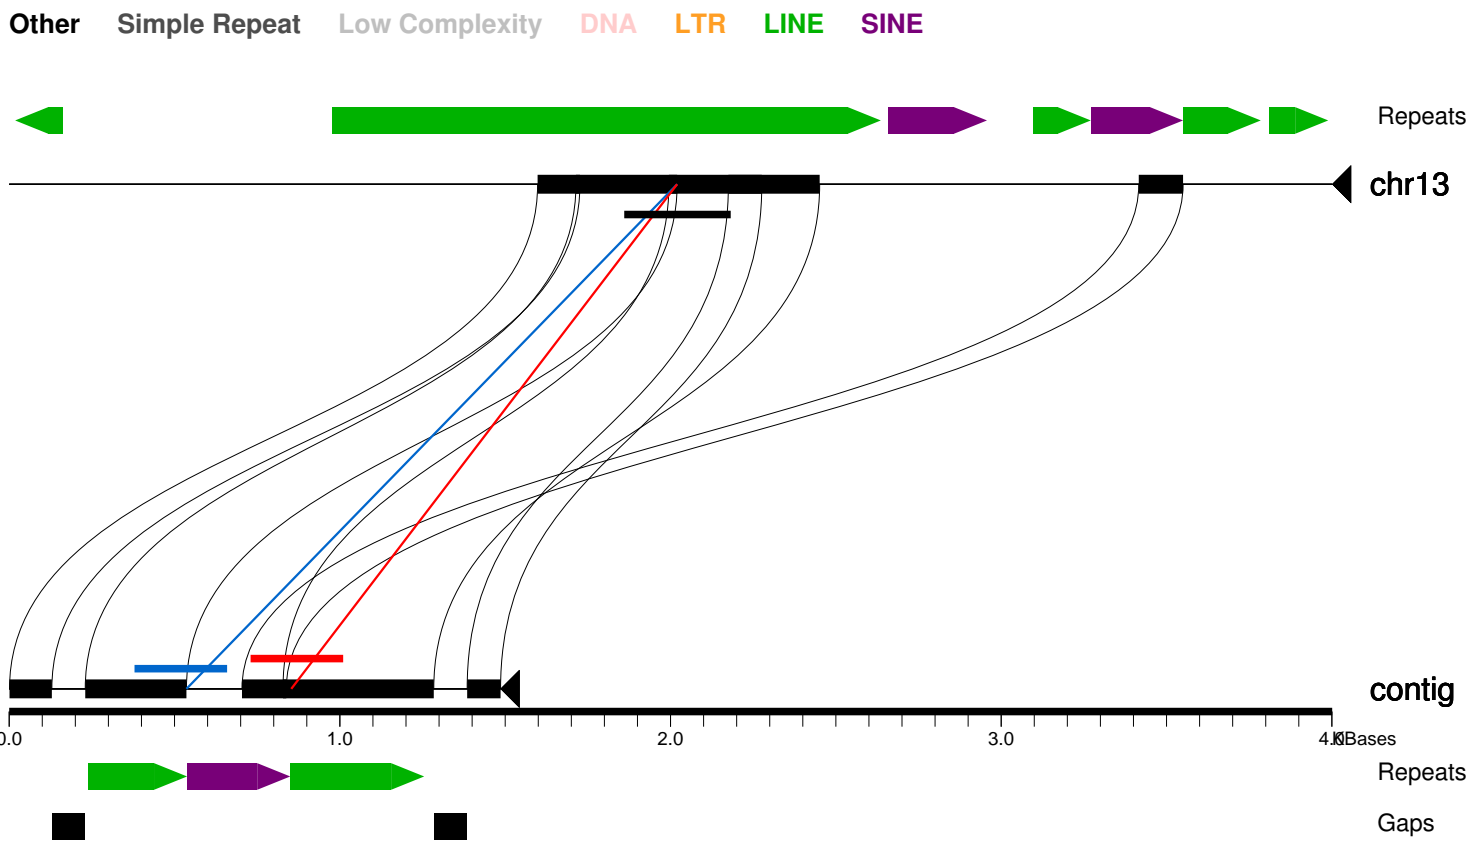

siteID: chr13\_34738976 Scafftig1 + Breakpoint: chr13:34738956

chr13:34738796-34739126

Overlap Length: 11 INS size: 280 Genotyped: Yes

```
left -----ACAGACACTAACCTGGCGGTAAGTCAGGGCAATTTTCATTACAAGTGCACGCTTGCATTTT
chrom TATGGCAATCACAGACACTAACCTGGCGGTAAGTCAGGGCAATTTTCATTACAAGTGCACGCTTGCATTTT
right CGTG--AACCCGGGAAGCGGAGCTTGCAGTGAGCCGAG-----ATTGCGCCACTGCAGT--
NN22 22N2111**11*11*1**1**1**1**1**1*1111111111111111*1***1*111****1*11
```

```
left ATGCCCCCTTAATCACTGTTACTGCTCTCCCAAGCAGCACATTCTTTTTCAGCTTGGATTTTGGACAATACGTT
chrom ATGCCCCCTTAATCACTGTTACTGCTCTCCCAAGCAGCACATTCTTTTTCAGCTTGGATTTTGGACAATACGTT
right ----CCGCAGTC-CGGC--CTGGGCGACAGAGCGAGACTCCGTCTCAAAAAAAAAAAAAAAAAAAAAAAAA--
111111**11*1**1*1*111***11*11*11***111**1111*1***111111*111111*1**1*11111
```

```
left CTTTGTTCAGAGGAATGCTGCAAAGAGGGTGA-----CTTTGGGAGGCCGAGGCGGGTGGATCATGA
chrom CTTTGTTCAGAGGAATGCTGCAAAAGAGGGTGAAGAGGGGCTGCTATTGCCAGAACAGTTCCCTGGCACCTGA
right -----AAAAA-----AAAGAGGGTGAAAGGGGCTGCTATTGCCAGAACAGTTCCCTGGCACCTGA
11111111*1*11**111111*****22222222**2*2*222*222**22222**22*2**
```

```
left GG-----TCAGGAGATCGA----GACCATC----CTGGCTAACAGGTGAAACCCCGTCTCTACTA
chrom GGCGGAGGTACTTAAAAAAGCCACTGTGTGCATTTACACTTGGCTCCATTGGTGCA-CACAGCCT-TACTC
right GGCGGAGGTACTTAAAAAAGCCACTGTGTGCATTTACACTTGGCTCCATTGGTGCA-CACAGCCT-TACTC
**222222222*2*22*2*2*2*2222*22***22222**2***22222****2*2*2*2*2**2****2
```

```
left AAAATACAAAAAATTA-GCCGGGCGCGGT-----GGCGG-GCG-----C
chrom AAAAGAATAATGATAATGCAGGTAACAGTCTTATCTGGCTCAGCGGTTTTTACC
right AAAAGAATAATGATAATGCAGGTAACAGTCTTATCTGGCTCAGC-----
****2*22**22**2*2**2**222*2**2222222**222*1 1
```

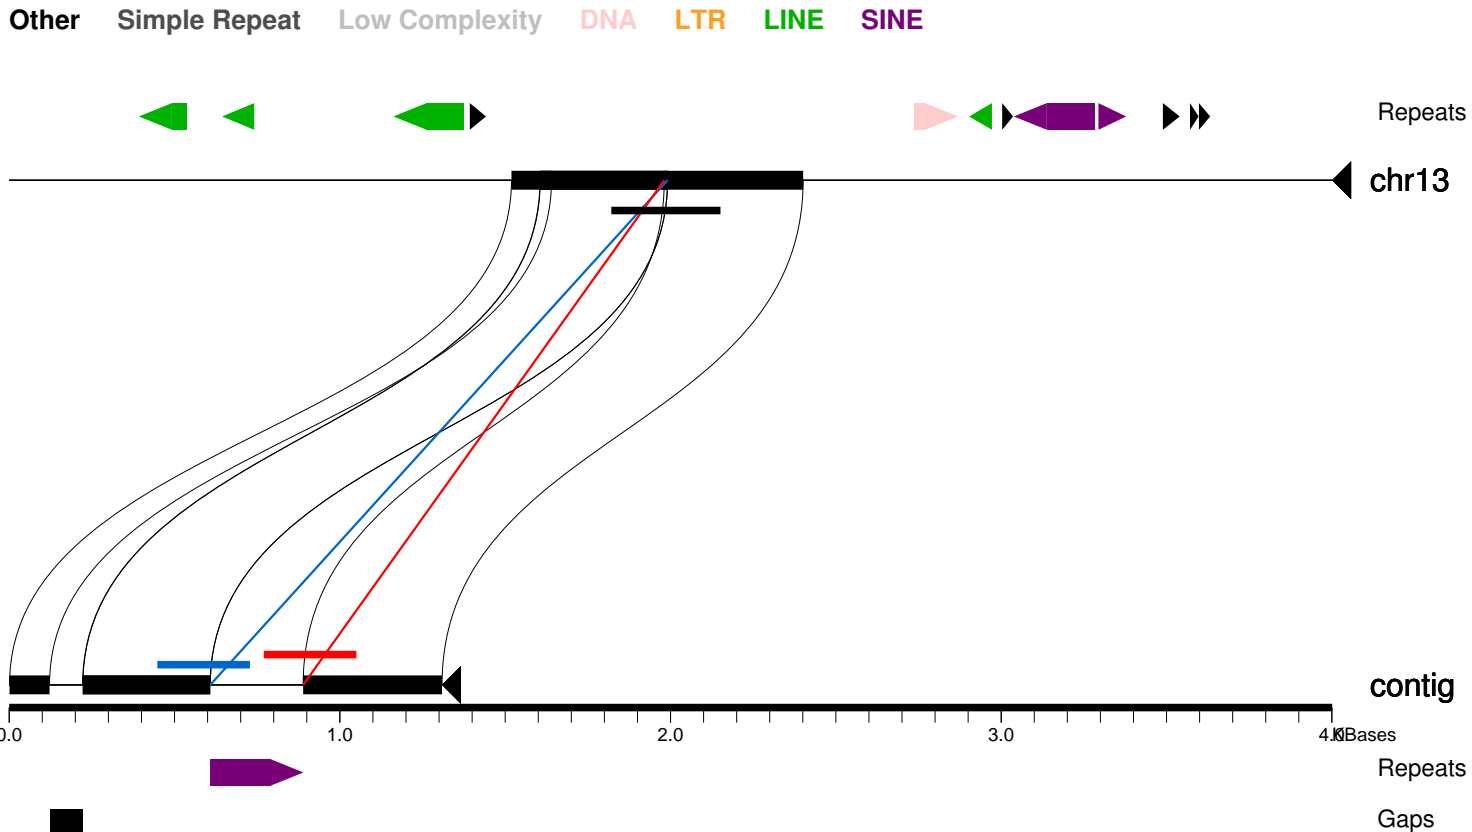

siteID: chr13\_37568751 Scafftig2 - Breakpoint: chr13:37568741

chr13:37568695-37568792

Overlap Length: 14 INS size: 410 Genotyped: No

```

left   TATTCAAACCCAGTTAACCAAAAAATAAAAAAGAG-----AGAAGAGAATAAA
chrom  TATTCAAACCCAGTTAACCAAAAAATAAAAAAGAG-----AGAAGAGAATAAA
right  NNNNNNNNNNNNNNNNNNNNNNNNNNNNNNNNNNNNNNNNNNNNNNNNNNNNNNNNNNN
      11111111111111111111111111111111111111111111111111111111
      1111111111111111111111111111111111111111111111111111111
      *1**1*1**1***

left   AGTTAACAGCATTGTAATCCCAAGCACTTTGGGAGGCCGAGGCGGGCGGATCATGAGGTCAGGAGATCGAGA
chrom  AGTTAACAGCAAA-AACAGCAACAAT-----ACACCTTTTCTTAC-----AAGTCACAA-----A
right  AGTTAACAGCAAA-AACAGCAACAAT-----ACACCTTTTCTTAC-----AAGTCACAA-----A
      *****222**222**2**2*22222*22**2222*222*22222222*2*****22*2222222*

```

Other   Simple Repeat   Low Complexity   DNA   LTR   LINE   SINE

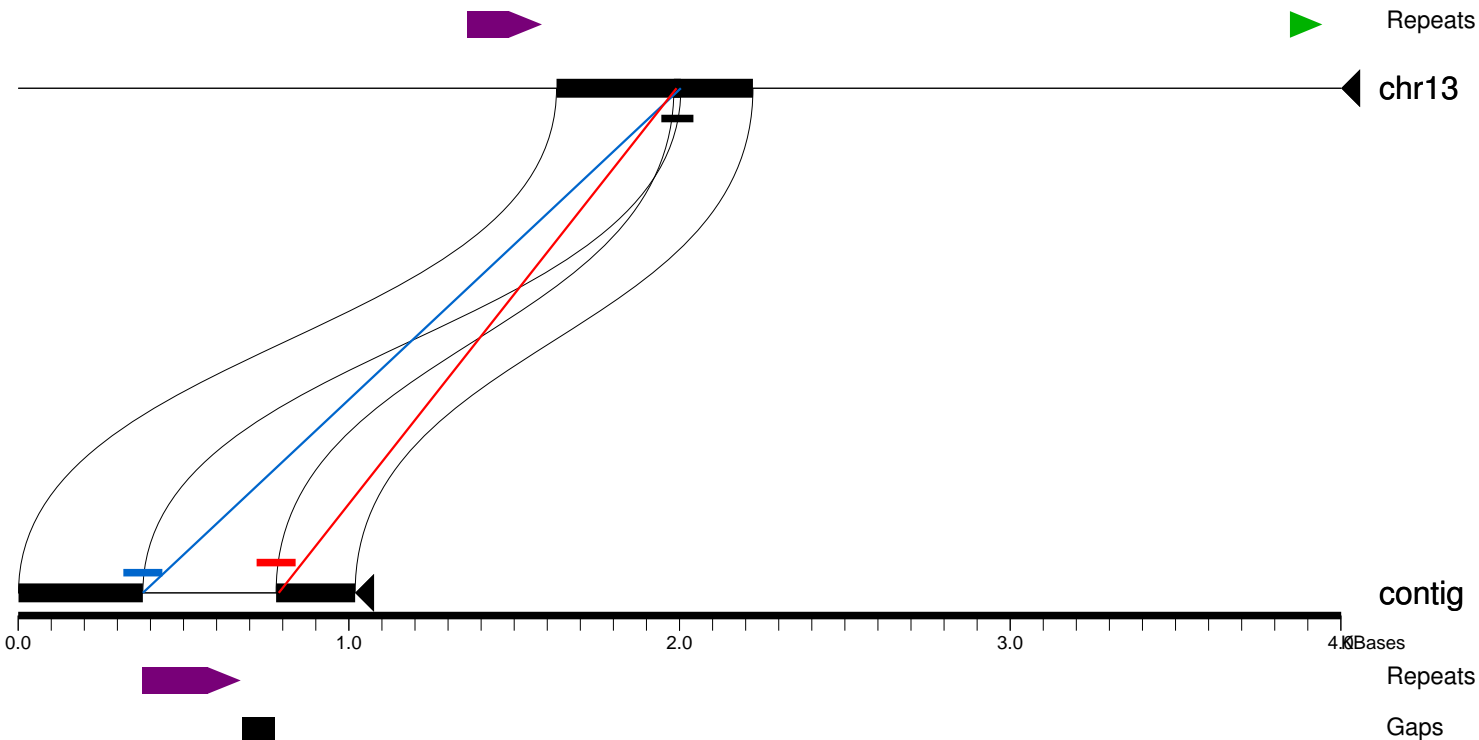



siteID: chr13\_39430882 Scafflig2 + Breakpoint: chr13:39430876

chr13:39430716-39431042

Overlap Length: 7 INS size: 314 Genotyped: Yes

```
left C-----TCAGAGTAAAGAGGGAACTATTAATTCAGTGCCACAACCTCATAAAACATATTCGAACCCACAA
chrom CAACATCTCAGAGTAAAGAGGGAACTATTAATTCAGTGCCACAACCTCATAAAACATATTCGAACCCACAA
right ----TTT---AGTAGAGACGGGGTTTCACCGTGTAGCCAGGA-TGGTCTCG-ATCTCCTGACCTCGTG
1 2N*111****1***1**111*111111*1111****11*1*11*11111**1*1*11***11111
```

```
left AGCAGTTAGC-TAACCCCTCCAAATCAAAGTCTGTTTCTCCTGGCTTTATCAGAATTTGATGTCCACAGCC
chrom AGCAGTTAGC-TAACCCCTCCAAATCAAAGTCTGTTTCTCCTGGCTTTATCAGAATTTGATGTCCACAGCC
right ATCCGCCCGCCTCGGCCTCC----CAAAGTG-----CTGGGATTA-CAGGCGT-GAG--CCACCGCG
*1*1*111**1*111*****1111*****1111111111****11***1***111*1**111****1**1
```

```
left TCGTGATCAAAAATGTTGCAGTCCATAAAATTTTTTTTTTTTTTTTTTTTTTTTTTTTTTTTGTGAG-----ACG
chrom TCATGATCAAAAATGTTGCAGTCTATAAAATCTTGTCTTTCTATACTTACTTAATTTATATTTGTCTCACTAACC
right CC-----CGGCCTAAAATCTTGTCTTTCTATACTTACTTAATTTATATTTGTCTCACTAACC
1*N1111111111111111*1*1*****2**2***2*2*22*22*22***2*2***2222222**2
```

```
left GAGTCTCGCTC----TG-----TCGCCAGGCTGGAGTGC-----AGTGGCGCGATCTCGGCTCACTG
chrom AGGTTTTCTCATAAAATGAACATAAATCCACAGAATGTTGACCTTTATATTTGGAAAATAATTTTTAAAACTA
right AGGTTTTCTCATAAAATGAACATAAATCCACAGAATGTTGACCTTTATATTTGGAAAATAATTTTTAAAACTA
22**2*22***2222*2222222*22*2***22*22*22222*2***2222*22*222222***2
```

```
left CAAG-CTCC-----GCCTCCCGGGTTCACGCCATTC-----
chrom CGTGTCTTTTTTGGGAATGTATTAATTTTTTATGTCTTTTGTCTTACATTTA
right CGTGTCTTTTTTGGGAATGTATTAATTTTTTATGTCTTTTGTCTT-----
*22*2*22222222*22*222222**2*2*2*2*22222
```

Other Simple Repeat Low Complexity DNA LTR LINE SINE

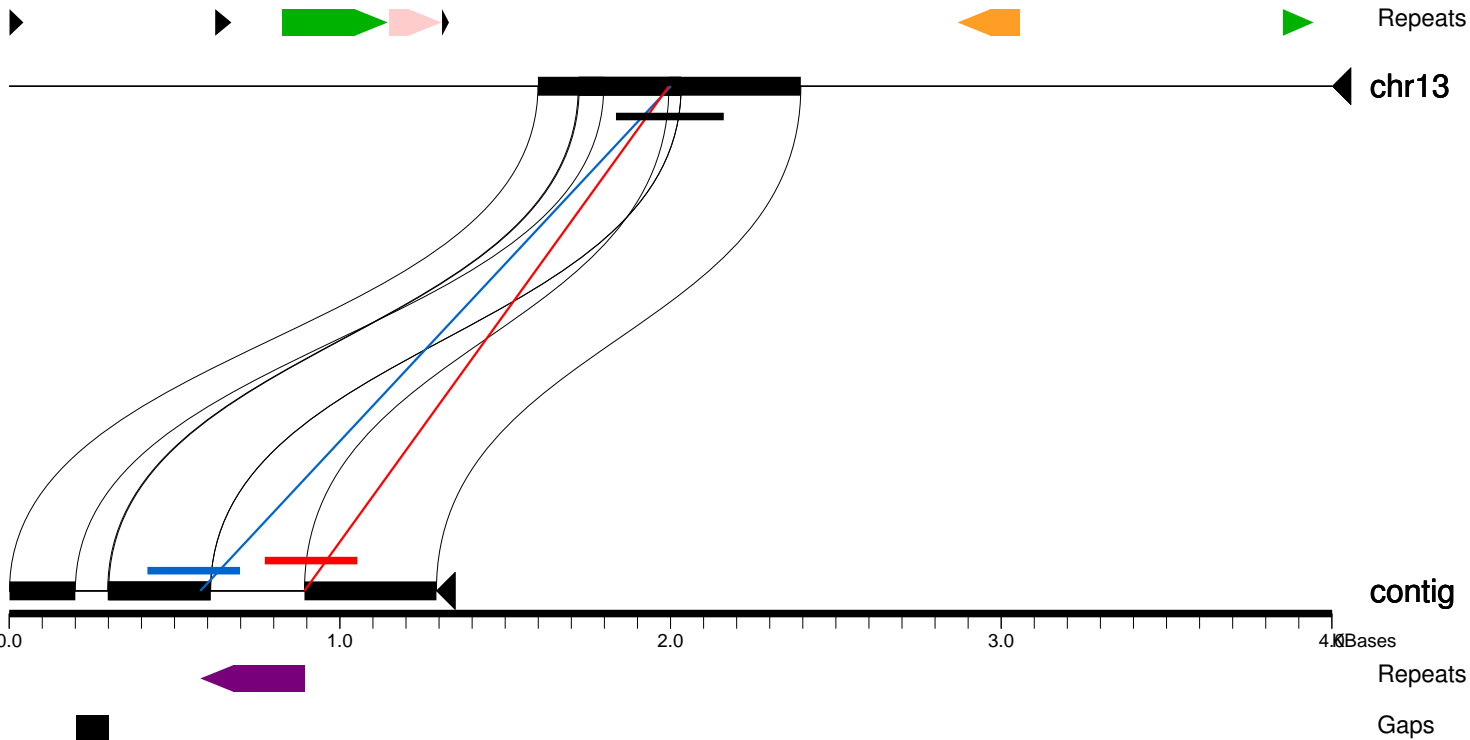

siteID: chr13\_39499612 Scafftig2 - Breakpoint: chr13:39499622

chr13:39499578-39499663

Overlap Length: 16 INS size: 336 Genotyped: Yes

```

left   GTGT-----TCTCTCATATGTGGGAGCTTAAAAAAAAAATTAGCTCAT-----
chrom  GTGT-----TCTCTCATATGTGGGAGCTTAAAAAAAAAATTAGCTCAT-----
right  GCCTGGGCGACAGAGCGAGACTCCGTCTCAAAAAAAAAAAAAAAAAAAAAAAAAAAAA
      *11*11111111111111111111*11****1*111111*1111*****11*1111*11111111111
  
```

```

left   -----GAAAGTAGAGAGTTGAAGGCCGGGCGCGGTGGCTCACGCCGTGTAATCCCAGCACTTTGGGAGGC
chrom  -----GAAAGTAGAGAGTTGAAT-----TGTAGG-----TATTAGAGGC
right  AAAAAAAGAAAGTAGAGAGTTGAAT-----TGTAGG-----TATTAGAGGC
      11111111*****222222222222222222222222****2222222222*2*22*****
  
```

```

left   CGAGGCGGGCGG
chrom  TG---GGAAAG
right  TG---GGAAAG
      2*2222**222*
  
```

Other Simple Repeat Low Complexity DNA LTR LINE SINE

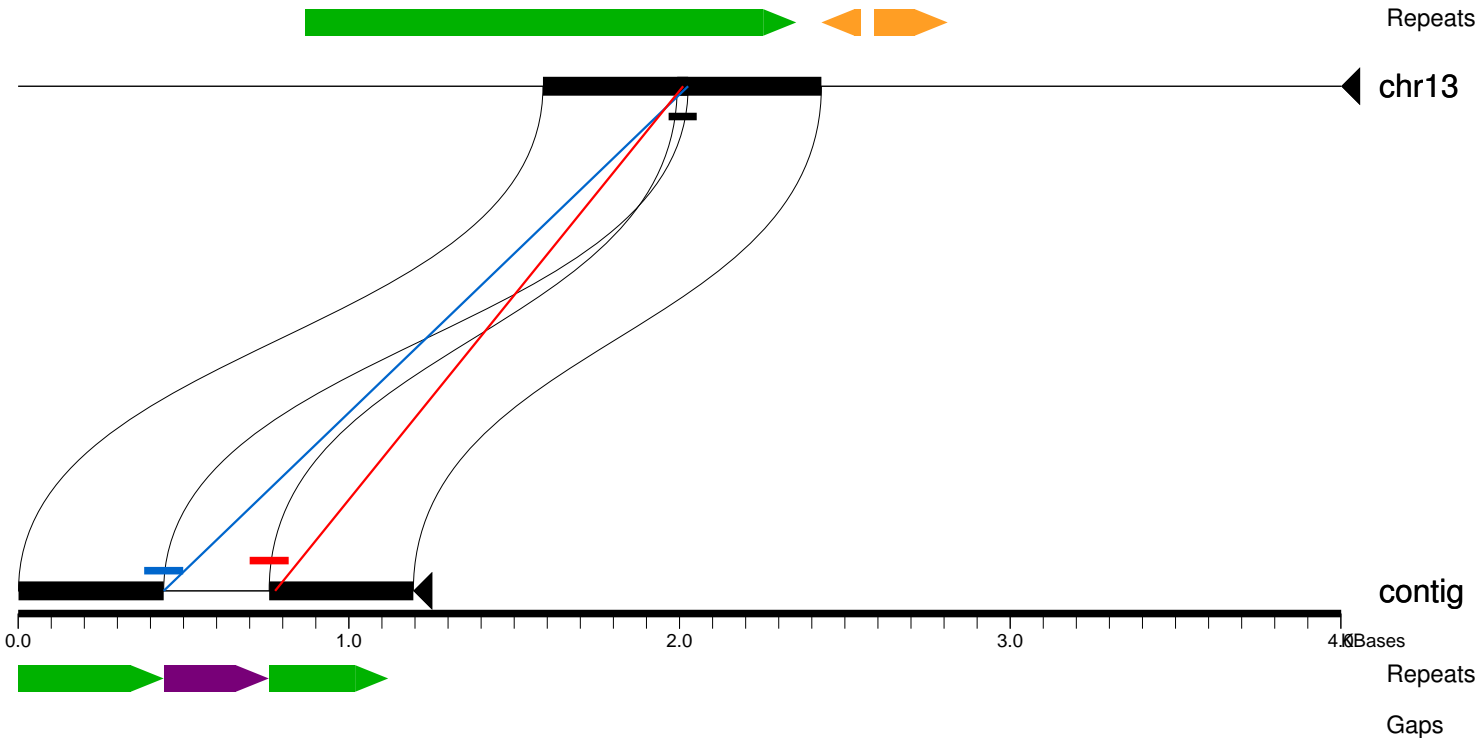



siteID: chr13\_42571554 Scaffitig12 - Breakpoint: chr13:42571548

chr13:42571501-42571607

Overlap Length: 13 INS size: 300 Genotyped: Yes

```
left  CTTACTAGGGAACTCTCATAACCTTTAC-ATTGATACAATCTCCCTTTT-----AAAAATCGTT  
chrom CTTACTAGGGAACTCTCATAACCTTTAC-ATTGATACAATCTCCCTTTT-----A  
right ACTGC-AGTCCGCAGTCCGGCCTGGGCGACAGAGCGAGACTCCGTCTCAAAAAAAAAAAAAAA  
11*1*1**1111*11**111***111*1*11**111*11****1*1*1111111111111111
```

```
left  TTAGGCCGGGCGCGGTGGCTCACGCCGTGTAATCCCAGCGCTTTGGGAGGCCGAGGCGGGTGG  
chrom TTATTGTGGTAAGAT---TCAC----TTAA---CATAAAATTGACCATCTTAACC--ATGT  
right TTAATTGTGGTAAGAT---TCAC----TTAA---CATAAAATTGACCATCTTAACC--ATGT  
**22222**222*2*222***22222***222**22222***22222*22*22*222**2
```

Other Simple Repeat Low Complexity DNA LTR LINE SINE

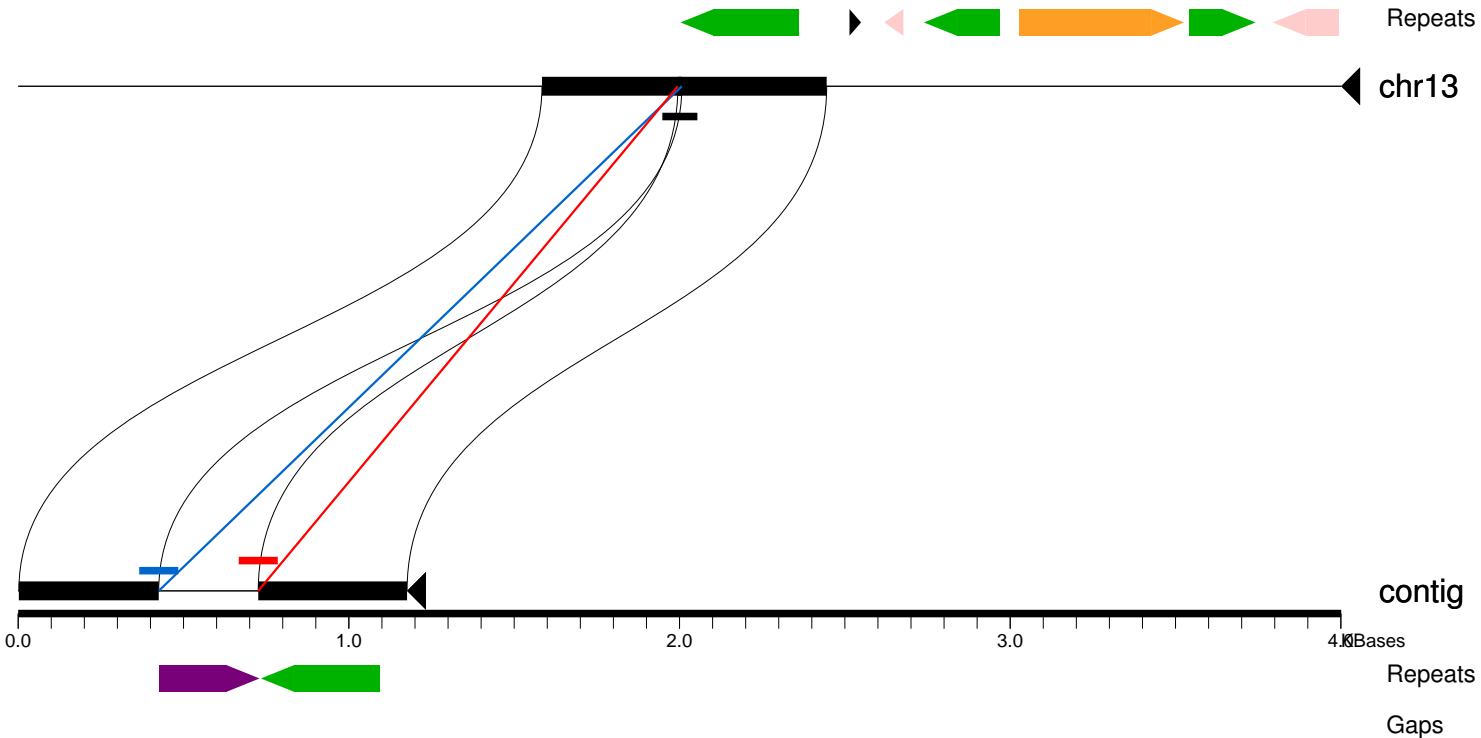

siteID: chr13\_42726773 Scafftig1 + Breakpoint: chr13:42726787

chr13:42726742-42726846

Overlap Length: 15 INS size: 417 Genotyped: No

```

left  TCCTTTTCCCATGG-----AAG-GCAGGG----CAGGAG---GGCACAGCTGCACAGGGACCTCTTTAT
chrom TCATTTTCCCATGG-----AAG-GCAGGG----CAGAAG---GGCACAGCTGCACAGGGACCTCTTTAT
right CCACCCGCCTCGGCCTCCCAAAGTGCTGGGATTACAGGCGTGAGCCACCGCGCCCGGCCGACCTCTTTAT
      1*211111**111*11111111***1**1***1111***N1*111*1***1**11*111111******
    
```

```

left  TCTTNNNNNNNNNNNNNNNNNNNNNNNNNNNNNNNNNNNNNNNNNNNNNNNNNNNNNNNNNNNNNN
chrom TCTT-----GATGGTTTCACTATCACCTTCTATTTTTGATGCTCTGGTGAACCA
right TCTT-----GATGGTTTCACTATCACCTTCTATTTTTGATGCTCTGGTGAACCA
      ***2222222222222222222222222222222222222222222222222222222222222222
    
```

Other Simple Repeat Low Complexity DNA LTR LINE SINE

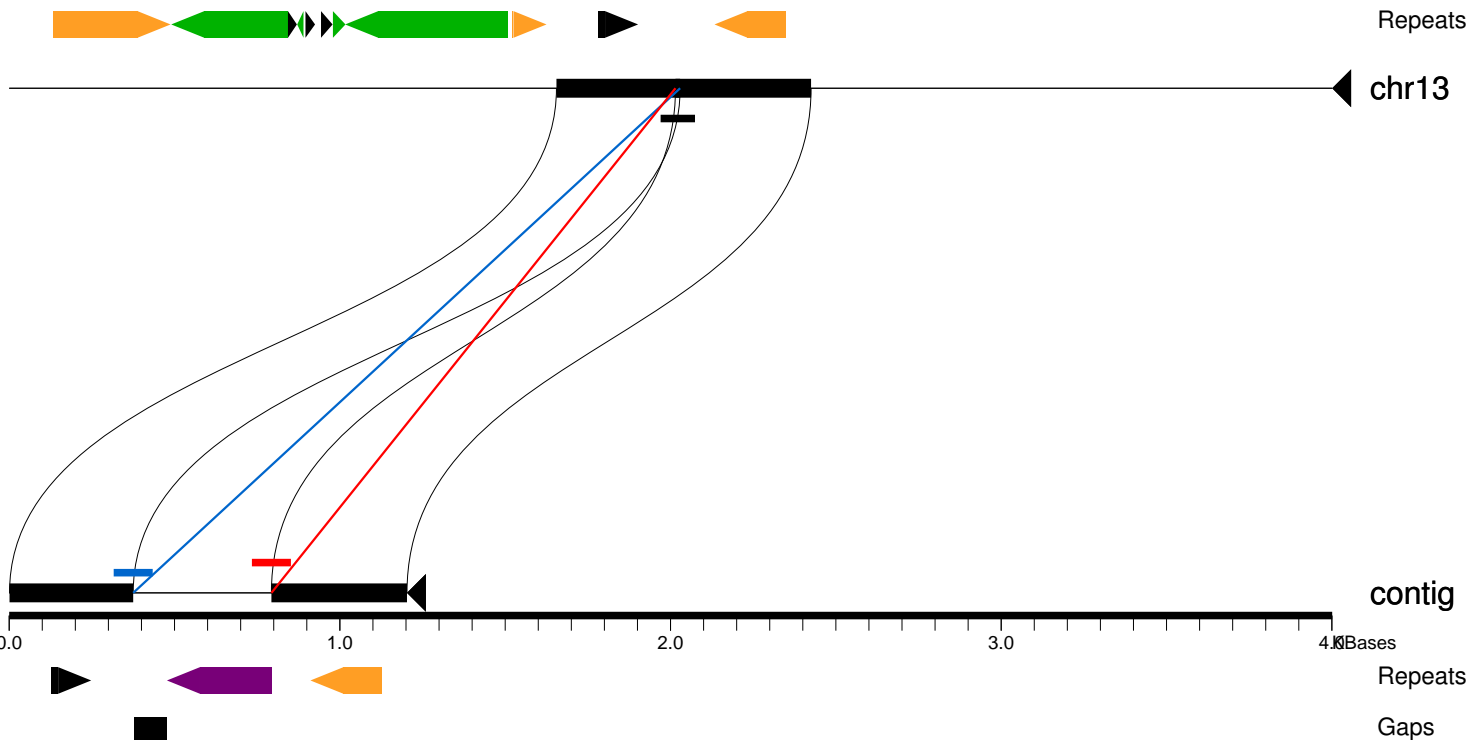



siteID: chr13\_46268080 Scafftig9 - Breakpoint: chr13:46268066

chr13:46267906-46268239

Overlap Length: 14 INS size: 300 Genotyped: Yes

```
left -----GGTTGAATTATGTCTCCCCAAAAAGATGTA-TTGAAGTCCTACCAGGAGACCTAAT
chrom TAGCTTCTATTATGGGTTGAATTATGTCTCCCCAAAAAGATGTA-TTGAAGTCCTACCAGGAGACCTAAT
right --GGCAGGAGAAATGGCGTGAA-----CCCGGAAGCGGAGCTTGCAGT-----GAGCC-----
      2NNNNN2NN222*11****111111111***111***11*111***1***111111111***1*11111
```

```
left TTGGAAATAGGATCATTTTCAGATGTAAGTACTAGTTAAGATGAGGTCCAACACTACAGTCTAGTGGCCCTCAATC
chrom TTGGAAATAGGATCATTTTCAGATGTAAGTACTAGTTAAGATGAGGTCCAACACTACAGTCTAGTGGCCCTCAATC
right ---GAGATTGCGCCACTGCAG---TCCGCAGTCC-GACCTGGGCGAC--AGAG-CGAGACTCCGTC--TC
      111**1**1*111**1*1***111*1111***111**111**1*1*111*1**1*1*111**1**11**
```

```
left CAATATGACTGGTGTCTTATAAGAAGAGGATACCGGCCGGGCGCGGTGGCTCACGCCTGTAATCCCAG-
chrom CAATATGACTGGTGTCTTATAAGAAGAGGATACCGGCCGGGCGCGGTGGCTCACGCCTGTAATCCCAG-
right AAAAAAAAAA-----AAAGAAGAGGATACCAG-----ATACAGACACACGAGGGTAGAATACTATT
      1**1*11*111111111111*1*****2*2222222*2*222*2*22122*22***2*2*22
```

```
left CACTTTGGGAGGCCGAGGCGG--GTGGATCATGAG--GTCAG-GA----GATCGA----GACCATC----
chrom CAATAAGAGAGGCAGAGATTGAAGTGCTGCAGCACAAAGTCAGAGAAATAGGATTGCTGATGACCACCAGAA
right CAATAAGAGAGGCAGAGATTGAAGTGCTGCAGCACAAAGTCAGAGAAATAGGATTGCTGATGACCACCAGAA
      **2*22*2*****2***222*22***222**22*222*****2**2222***2*22222*****2*2222
```

```
left -CTGGCTAACA---AGGTGA--AACCCCGTCTCTACT---AAA-----
chrom GCTGGGAGAGAGGCAGGCAAGGACCCCTCCCCTCTGATGTCAGAGGGAGCGTGGCTCTGC
right GCTGGGAGAGAGGCAGGCAAGGACCCCTCCCCTCTGATGTCAGAGGGAGCG-----
      2***222*2*222***N2*22*2**2*22***22*222*2*222222
```

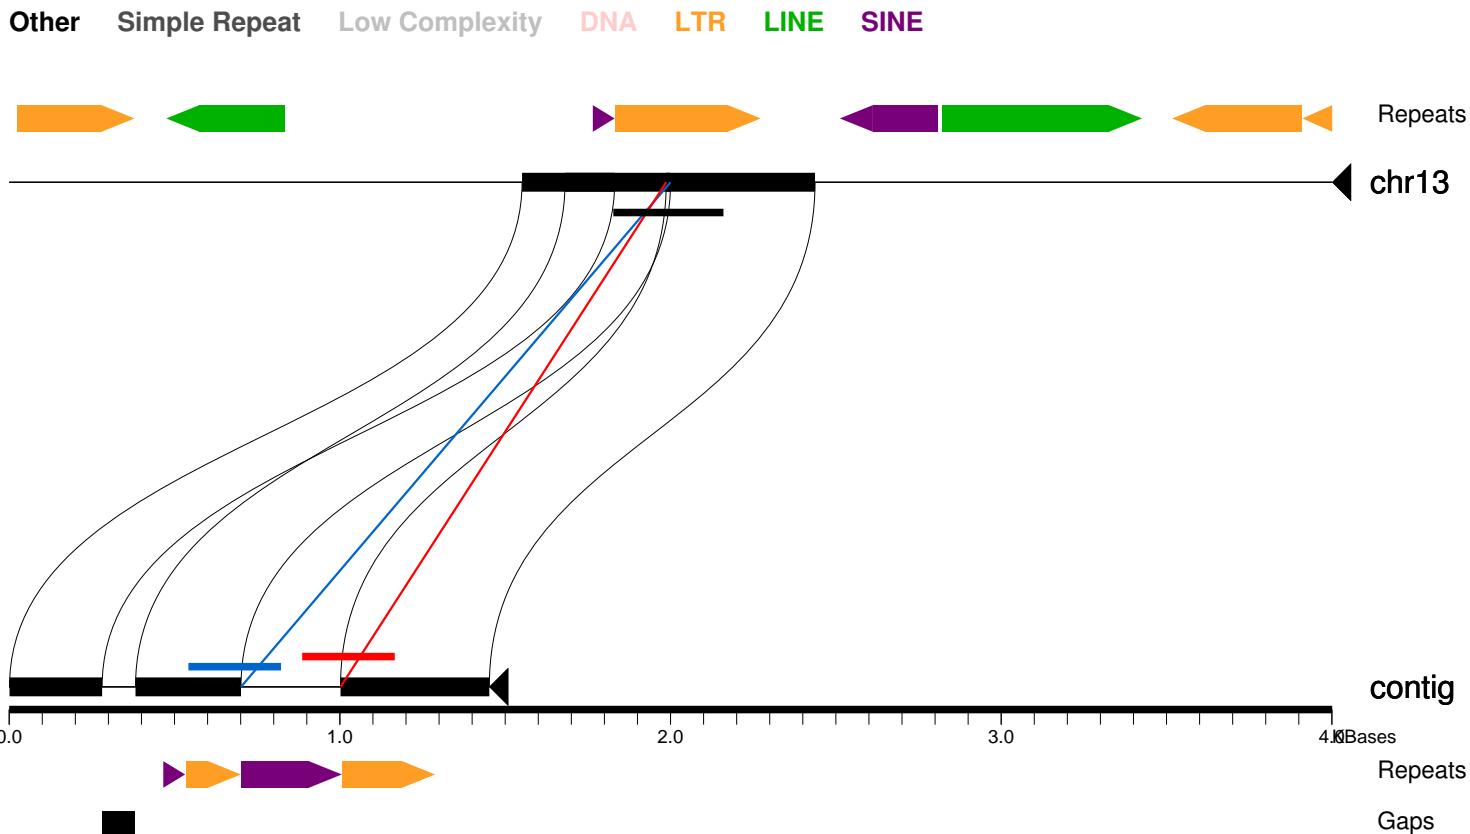

siteID: chr13\_46647648 Scafftig4 - Breakpoint: chr13:46647733  
 chr13:46647689-46647792  
 Overlap Length: 16 INS size: 472 Genotyped: No

```

left  TAA-----CTCCTTCAGTCCT----TTCCTCTACTTAGTAAACATATTATAATCAATGTACTAT
chrom TAA-----CTCCTTCAGTCCT----TTCCTCTACTTAGTAAACATATTATAATCAATGTACTAT
right CCGCCCGCCTCGGCCTCCCAAAGTGCTGGGATTACAGGCGTGAGCCACCGCGCCCGGCCCAATGTACTAT
      11111111111111111111****111***1**1111**1*11111*1**11*1*11111111111*****

```

  

```

left  TTCTTTNNNNNNNNNNNNNNNNNNNNNNNNNNNNNNNNNNNNNNNNNNNNNNNNNNNNNNNNNNNN
chrom TTCTTAAT-----CATTTTCCACTGTTTGTAGCTCCAGGCAGAAATGTAGAAAAGA
right TTCTTAAT-----CATTTTCCACTGTTTGTAGCTCCAGGCAGAAATGTAGAAAAGA
      ****22*2222222222222222222222222222222222222222222222222222222222222

```

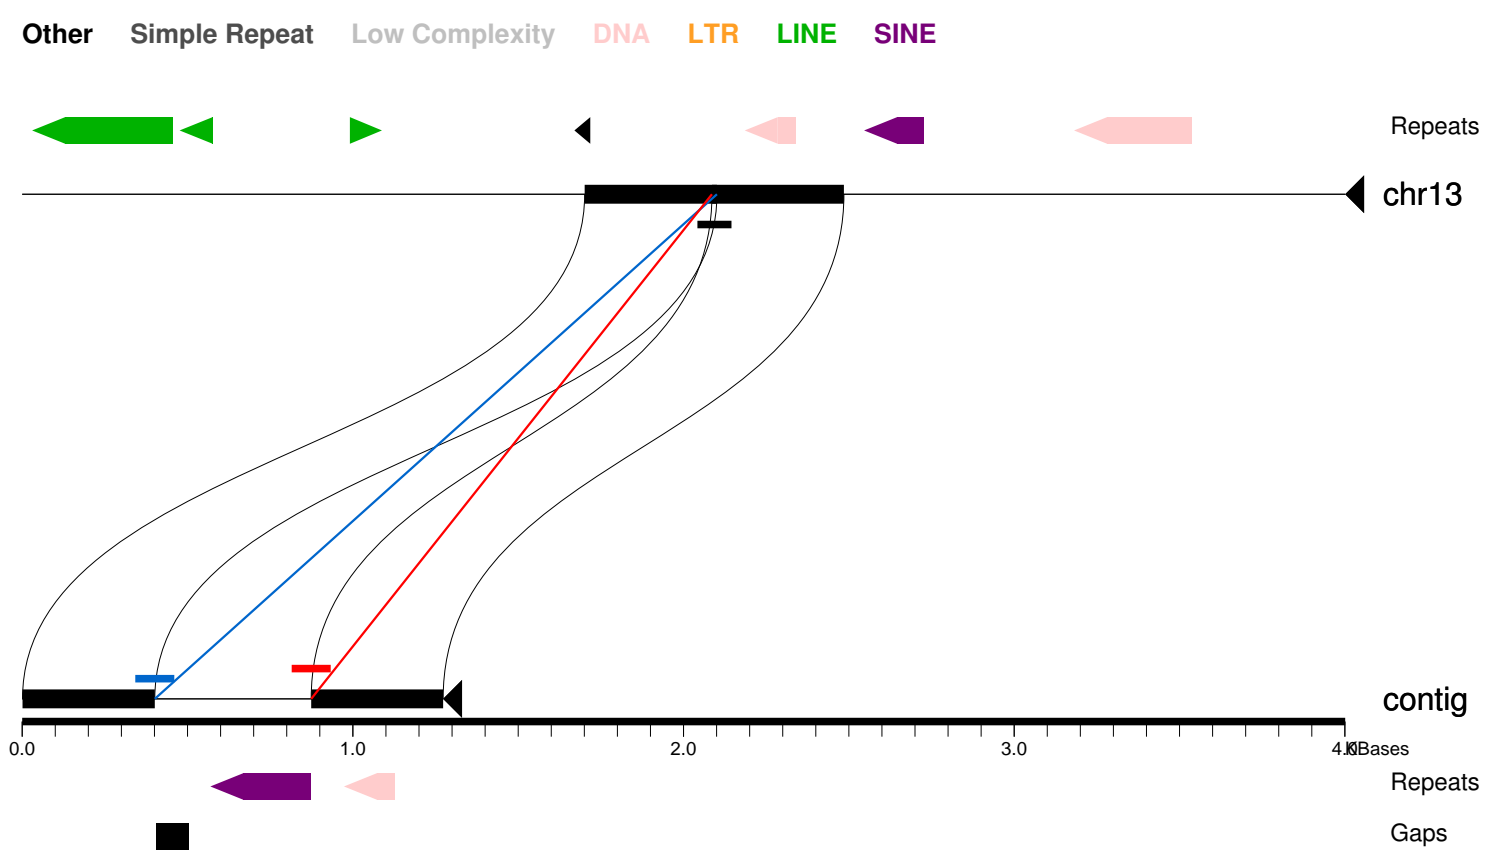



siteID: chr13\_49336679 Scafftig1 + Breakpoint: chr13:49336663

chr13:49336503-49336833

Overlap Length: 11 INS size: 332 Genotyped: Yes

```
left -----CTCATATCGGGAGATGAGAGCCCTGGACATAAT-GTTATTGTGTTTATTGTTCTCTTGA
chrom TCCTCTGACTTCTCATATCGGGAGATGAGAGCCCTGGACATAAT-GTTATTGTGTTTATTGTTCTCTTGA
right AGAA-TGGCGTG--AACCCGGGAGGCG-GAGCT-TGCAGTGAGCCGAGATCGCGCC-ACTGCACTCCAGC
NNNN 22N2N21111*1111*****11*1****11**1*111*111*11**1*1*111*1**11**11**1*1
```

```
left ---GGTCACTTAGCCATGGCCTAGCTTTCTCACTAGACTAAAAACCCCTTAAGGTGAGACTGTCTCTCTT
chrom ---GGTCACTTAGCCATGGCCTAGCTTTCTCACTAGACTAAAAACCCCTTAAGGTGAGACTGTCTCTCTT
right CTGGGCGACAGAGCGA--GACT--CCGTCTCAAAAAA-TAAAAAAAAAAAAAAAAATAAATAAAAAATAAAAA
1111**11**11**1*11*1**11*11*****11*1*1*****111111**11*1*1111111*11111
```

```
left ATTTGTCCCTCTCTCACAGCCTATAGAAGTTCCTG--GGCCGGGCGCGGTGGCTCACGCC-----TG
chrom ATTTGTCCCTCTCTCACAGCCTATAGAAGTTCCTGATGACACATAGCTTGTACTCAATCAATAGATGGTG
right AAATA-----AAAATAAAGAAGTTCCTGATGGCACATAGCTTGTACTCAATCAATAGATGGTG
*11*1111111111111111*1111**1*****22*N*22222*22222****22*222222222**
```

```
left TAATCCCAGCACTTTGGGAGGCCGAGGCGGGCGGATCACGAGG--TCAGGAGATCGAGACCATCC-----
chrom AATTCAGAAGCCTATGTAAATAAACAAT-GGGGGGATAGACAGGAATCAGCATTTCTTAAGGATGCCCCAT
right AATTCAGAAGCCTATGTAAATAAACAAT-GGGGGGATAGACAGGAATCAGCATTTCTTAAGGATGCCCCAT
2*2**22*222*2**22*22222*222***2****2222***22****2*22**222*22**2*22222
```

```
left -TGGCTAACACGGTGA---CCC-----CGTCTCTACTA-----AA
chrom GTGTCCAGCACTTGCACATATTATCTCATTAAATCTTCTCAACAACCTTCCAAGAT
right GTGTCCAGCACTTGCACATATTATC-----
2*2*2*2**2222*2*222222*N1 1N1111N11N1 1N
```

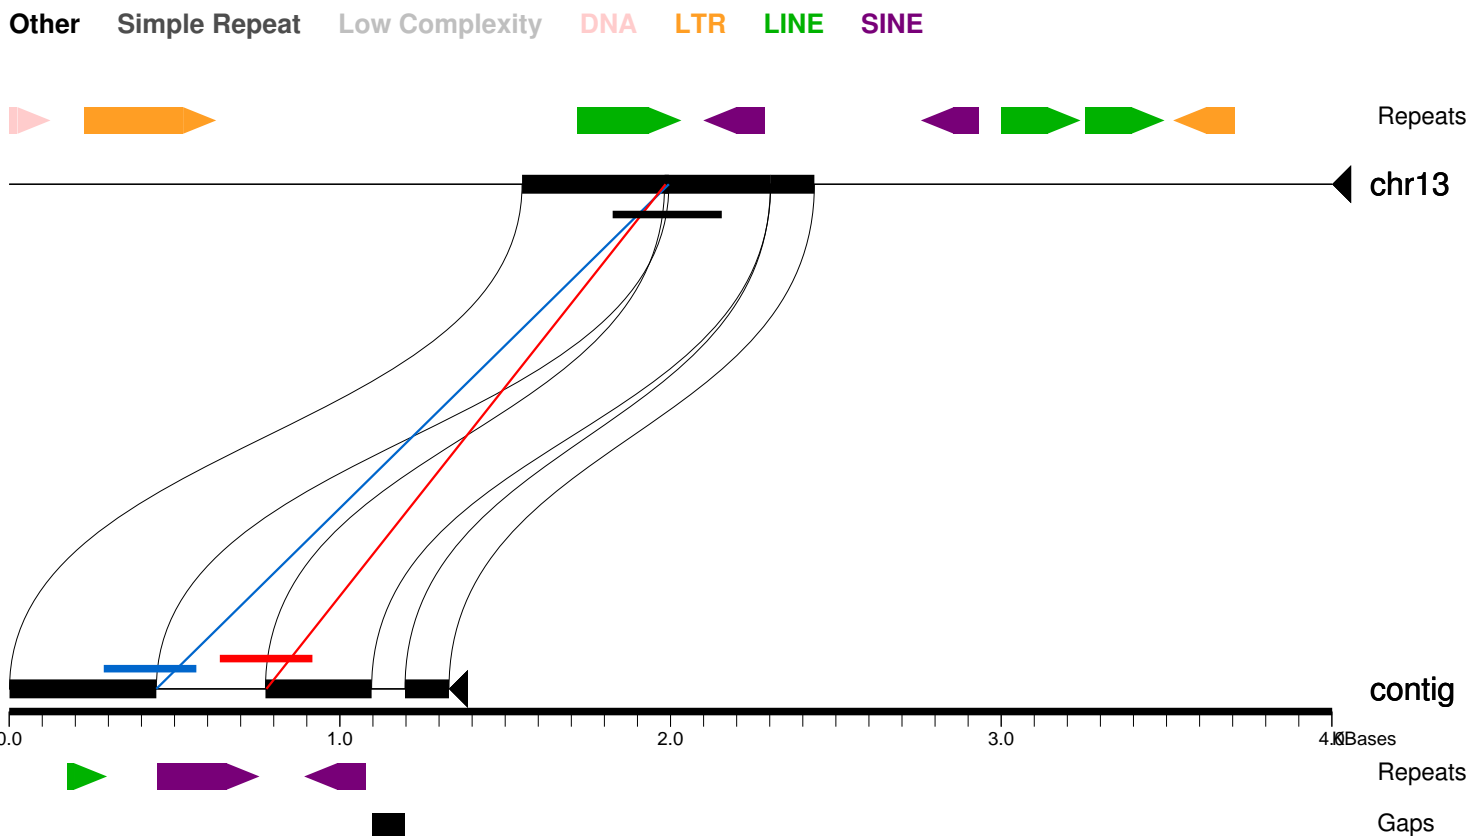

siteID: chr13\_50042762 Scafftig1 + Breakpoint: chr13:50042751

chr13:50042716-50042810

Overlap Length: 14 INS size: 463 Genotyped: No

```
left AAAAC-----AAAGAAGTATCTTTAGAA----AGAAACTTCTTT-----GTTACCCTAAT  
chrom AAAAC-----AAAGAAGTATCTTTAGAA----AGAAACTTCTTT-----GTTACCCTAAT  
right CACCCGCCTCGGCCTCCCAAAGTGCTGGGATTACAGGCGTGAGCCACCGCGCCCGGCCGGCCGTTACCCTAAT  
1*11*1111111111111111****111*1111***1*111111**11*11*1111111111*****
```

```
left TTC TTT TTT TTT TTT TTT NNNNNNNNNNNNNNNNNNNNNNNNNNNNNNNNNNNNNNNNNNNNNNNNNNNNNNNNNNNNNNNNNNNNNNNNN  
chrom TTCATTTGTTCTTT-----CAGCTTAATATTTAAATTTGACTAAGAAAAACTA  
right TTCATTTGTTCTTT-----CAGCTTAATATTTAAATTTGACTAAGAAAAACTA  
***2***2***2***22222222222222222222222222222222222222222222222222222222222222222222222222222222
```

```
left NNN  
chrom TAT  
right TAT  
222
```

Other   Simple Repeat   Low Complexity   DNA   LTR   LINE   SINE

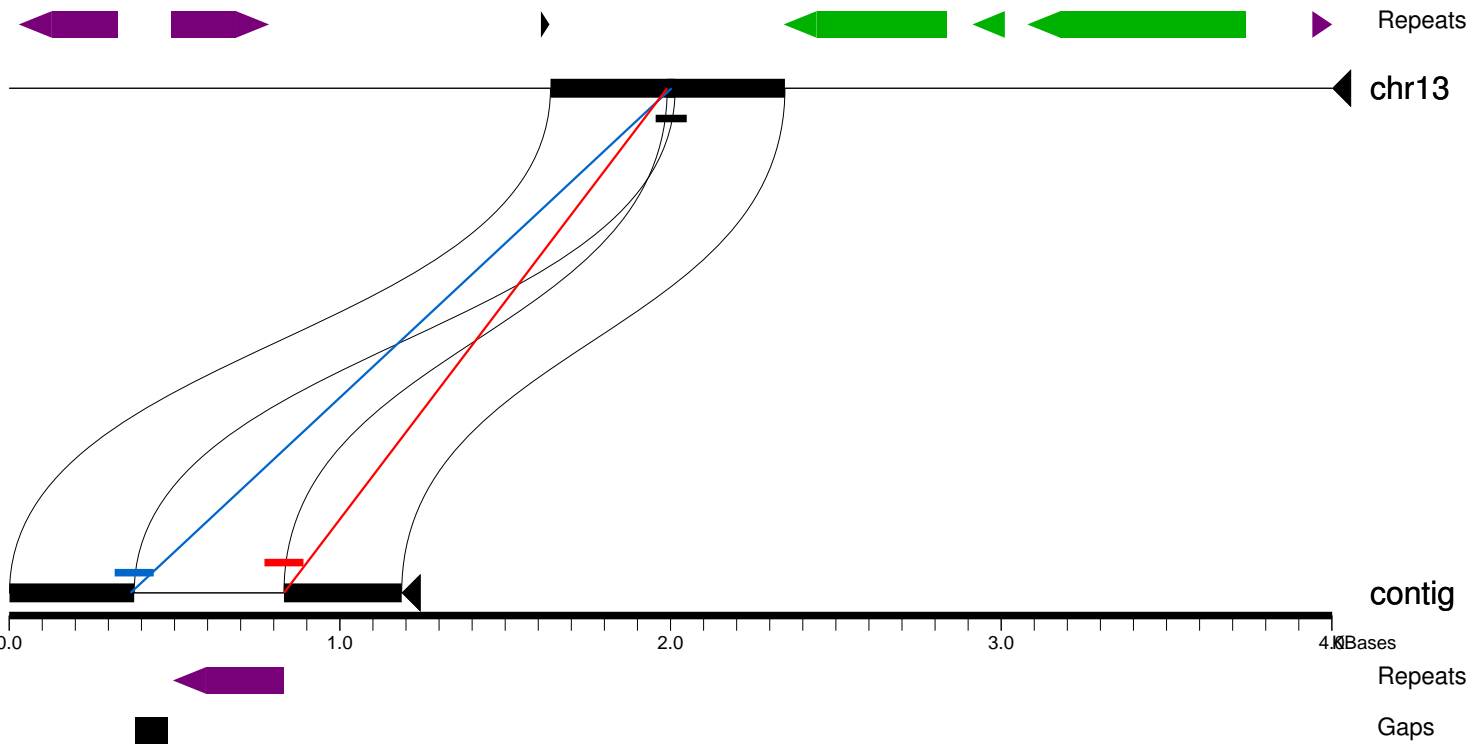



siteID: chr13\_50173368 Scafftig2 - Breakpoint: chr13:50173359

chr13:50173199-50173528

Overlap Length: 10 INS size: 303 Genotyped: Yes

```
left -----AGAAGTAGACATAGGAGACTCCATTTTGTTCGTACTAAGACAAAATCTTCTGCCTTGAGATT
chrom TGTAGAAAAGAAGTAGACATAGGAGACTCCATTTTGTTCGTACTAAGACAAAATCTTCTGCCTTGAGATT
right TTTAG-----TAGAGACGGGGT--TTCACCGTGT-----AGCCAGGATGGTCTC----GATCTC
2N222 11111****1*11**1111*1**111****11111111**1**111*11***11111**11*1
```

```
left CTGTTAATCTATGACCTTACTCCCAACCCTGTGCTCTCTGAAACATGTGCTGTGTCAAACCTCAGGGTTAA
chrom CTGTTAATCTATGACCTTACTCCCAACCCTGTGCTCTCTGAAACATGTGCTGTGTCAAACCTCAGGGTTAA
right CTG---ACCT----CGTGATCCGCCCGCCTCGGC-CTCCCAA---GTGCTGGGATTA---CAGGAGTGA
***111*1**1111*1*1*11*1*111**11**1**11**111****1*111*111****11*1*
```

```
left ATGGATTAAGGGCGGTGCAAGATGTGCTTTTTTTTTTTTTTTTTTTTT-----TTTTTGAGACGGAGT
chrom ATGGATTAAGGGCGGTGCAAGATGTGCTTTGTTAAACAGATGCTTGAAGGCAGCATGCTCGTTAAG-AGT
right ---GCCACCGCGCCCGCC-GATGTGCTTTGTTAAACAGATGCTTGAAGGCAGCATGCTCGTTAAG-AGT
111*11111*1**111**11*****2**2222222*22**222222222*22*2*22*2*2**
```

```
left C-TCACTCTTTTCGCCCAAGCTGGACTG--CAGTGGGGCTATCCCGCT-----CACTGCAAGCTCCGCC
chrom CATCAC-CACTC-CCTAATCTCAAGTATCCAGGGACACAAACACTGCGGAAGGCCACAGGGACCTCTGCC
right CATCAC-CACTC-CCTAATCTCAAGTATCCAGGGACACAAACACTGCGGAAGGCCACAGGGACCTCTGCC
*2****2*22*2**2*2**22*2*222***2*222*2*2*2**2222222***2*22*2***2***
```

```
left TC-----TTG-----GTT-----CATGCCATTCTCC----TGC
chrom TAGGAAAAGCCAGGTATTGTCCAAGGTTTCTCCCCATGTGATAGTCTGAAATAT
right TAGGAAAAGCCAGGTATTGTCCAAGGTTTCTCCCCATGTGATAG-----
*2222222222222222***22222***22222***22**2211N 1NN
```

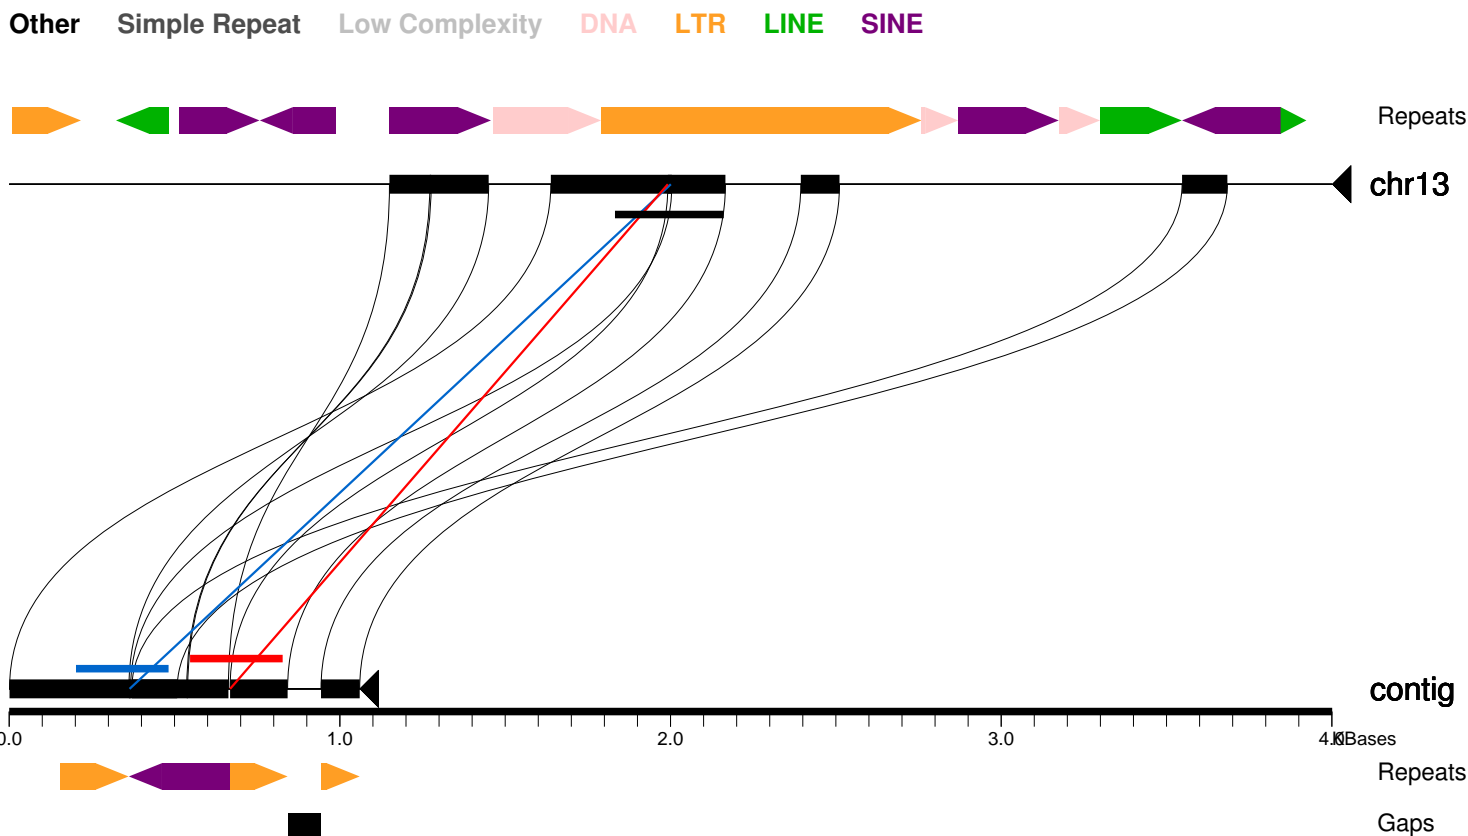



siteID: chr13\_55438080 Scafftig7 - Breakpoint: chr13:55438076

chr13:55438028-55438131

Overlap Length: 12 INS size: 310 Genotyped: Yes

```
left  TGTA-----AATATTTTAACAATTGGT-TCAATGTAATTTTGCAACATTTAAAA----GTTTCACC
chrom TGTA-----AATATTTTAACAATTGGT-TCAATGTAATTTTGCAACATTTAAAA----GTTTCACC
right ACTCCAGCCTGGGCGACAGAGCGAGACTCCGTCTCAAAAAAAAAAAAAAAAAAAAAAAAAAAAAAAAGTTAACC
      11*1111111111111111*1*111111*1*1*11**1****111**1111111*1*111****1111***1***

left  TTTTGGCCGGGCGCGGTGGCTCACGCCTGTAATCCCAGCACTTTGGGAGGCCGAGGCGGGCGG-
chrom TTTTAT-----ACATATGTATAACATATACTTTTATATATAAAATGTATAAAATA
right TTTT-----ACATATGTATAACATATACTTTTATATATAAAATGTATAAAATA
      ****N22222222222222222222**222****22*22*2222***222*22222*2*22222222
```

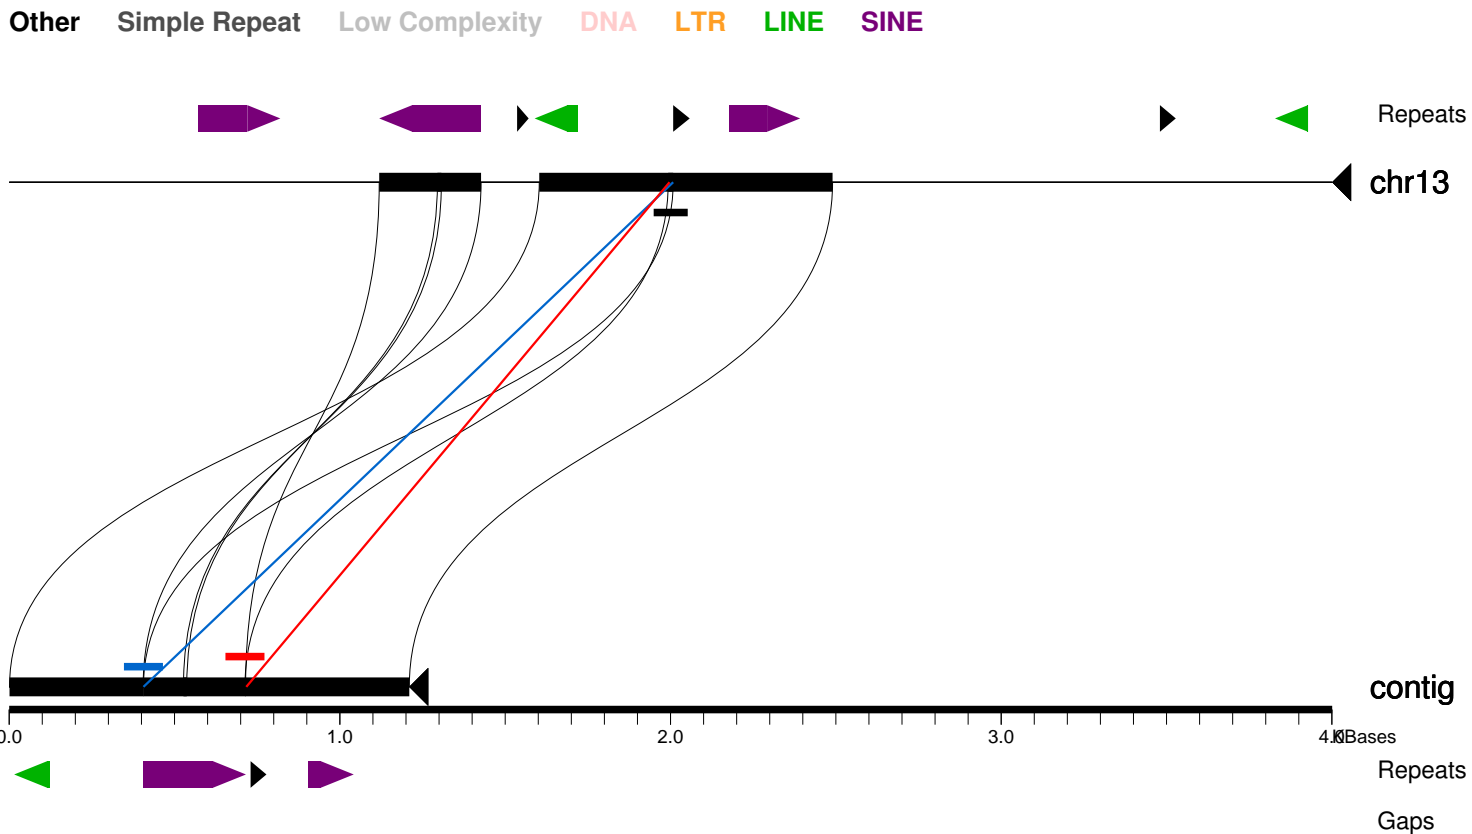





siteID: chr13\_57589043 Scafftig3 + Breakpoint: chr13:57589015

chr13:57588970-57589074

Overlap Length: 15 INS size: 116 Genotyped: Yes

```
left  CACTCAGTTAAGCCTGAACTTTC--AATCCACAAAAACTGTGAGATA-----TATACGTGATT
chrom CACTCAGTTAAGCCTGAACTTTC--AATCCACAAAAACTGTGAGATA-----TATACGTGATT
right CGCCCAGGCTGGAGTGCAGTGGCGCAATCTCGGCTCACTGCAAGCTCCGCCTCCCGGGT-TATACGTGATT
      *1*1***1111*11*1*1*11*11****1111111****11*1*1111111111111*****
```

```
left  TTTTFFFFFFFFFFFFFFFFFFFFFFFFFFFFFFFFFFFFFFFFFFFFFFFFGGAGACGGAGTCTCGCTCTGTCG
chrom TTTTAGACTATTAGGTTTATGTAATTTGTTACCT-----AGAAACCAA---TAACTA-----
right TTTTAGACTATTAGGTTTATGTAATTTGTTACCT-----AGAAACCAA---TAACTA-----
      ***2222*2**222***2*2*22***2**222*2222222**2**22*222*22**222222
```

Other Simple Repeat Low Complexity DNA LTR LINE SINE

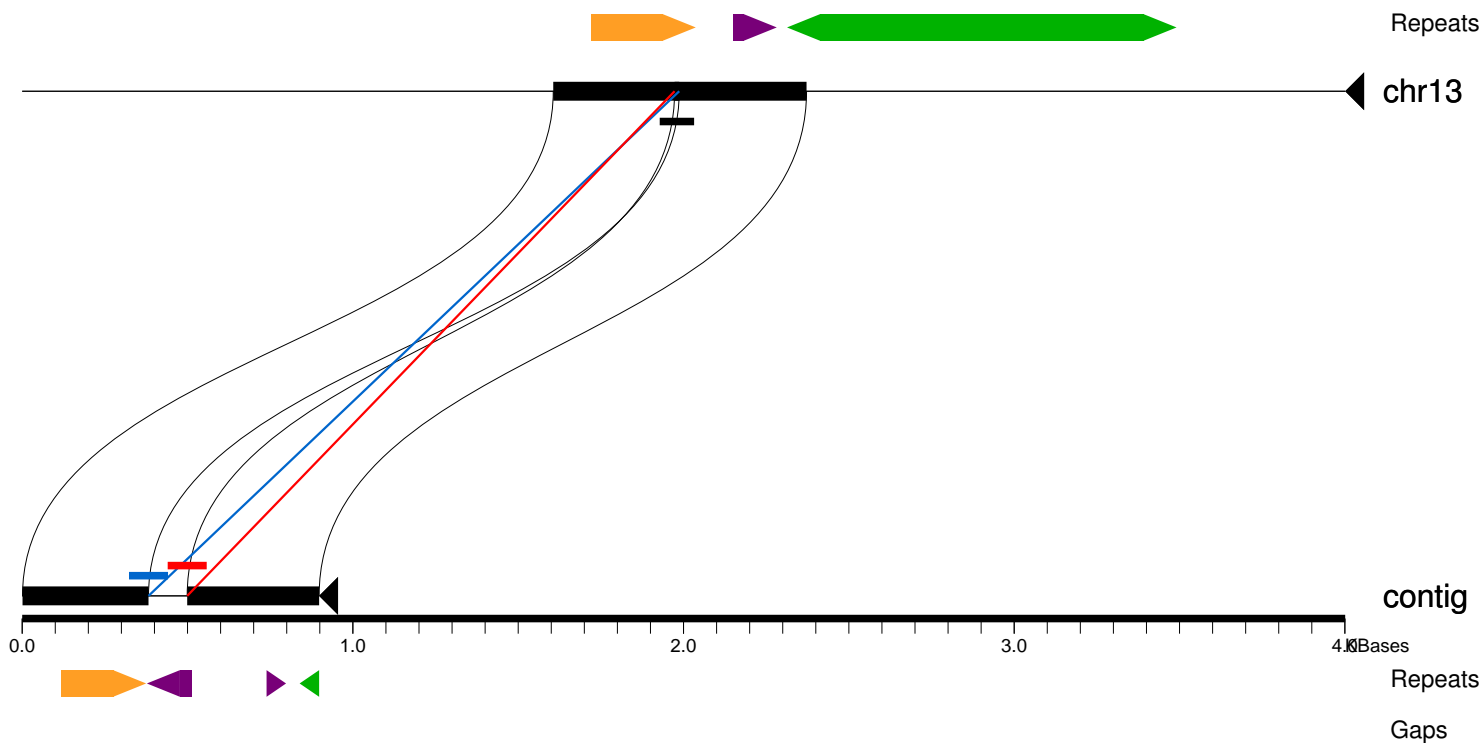

siteID: chr13\_58621074 Scafftig14 + Breakpoint: chr13:58621052

chr13:58621007-58621111

Overlap Length: 15 INS size: 277 Genotyped: Yes

```
left  ---CTGTATAATACAAAAATAA-----ATTTTTT---GTTTTAAAAATTAAAAACACAAAATGAATAA
chrom ---CTGTATAATACAAAAATAA-----ATGTTTT---GTTTTAAAAATTAAAAACACAAAATGAATAA
right AGCCAGGATGGTCTCGATCTCCTGACCTCATGATCCACCCGCCTCGGCCTCCCAAAGTGA AAAATGAATAA
      111*1*1**11*1111*11*111111111**21*111111*11*11111*111***111*****
```

```
left  TATTTTTTTTTTTTTTTTTTTTTTTTTTTGAGACGGAGTCTCGCTCTGTCGCCAGCCGGACTGC
chrom TATTAATAAAAATCAATCAAAATT----AGTTGAATT----TCTATGGTACA--CTAGAT---
right TATTAATAAAAATCAATCAAAATT----AGTTGAATT----TCTATGGTACA--CTAGAT---
      ***22*2222*222*22222**2222**22*2*2*22222***2*2*22**22*22**2222
```

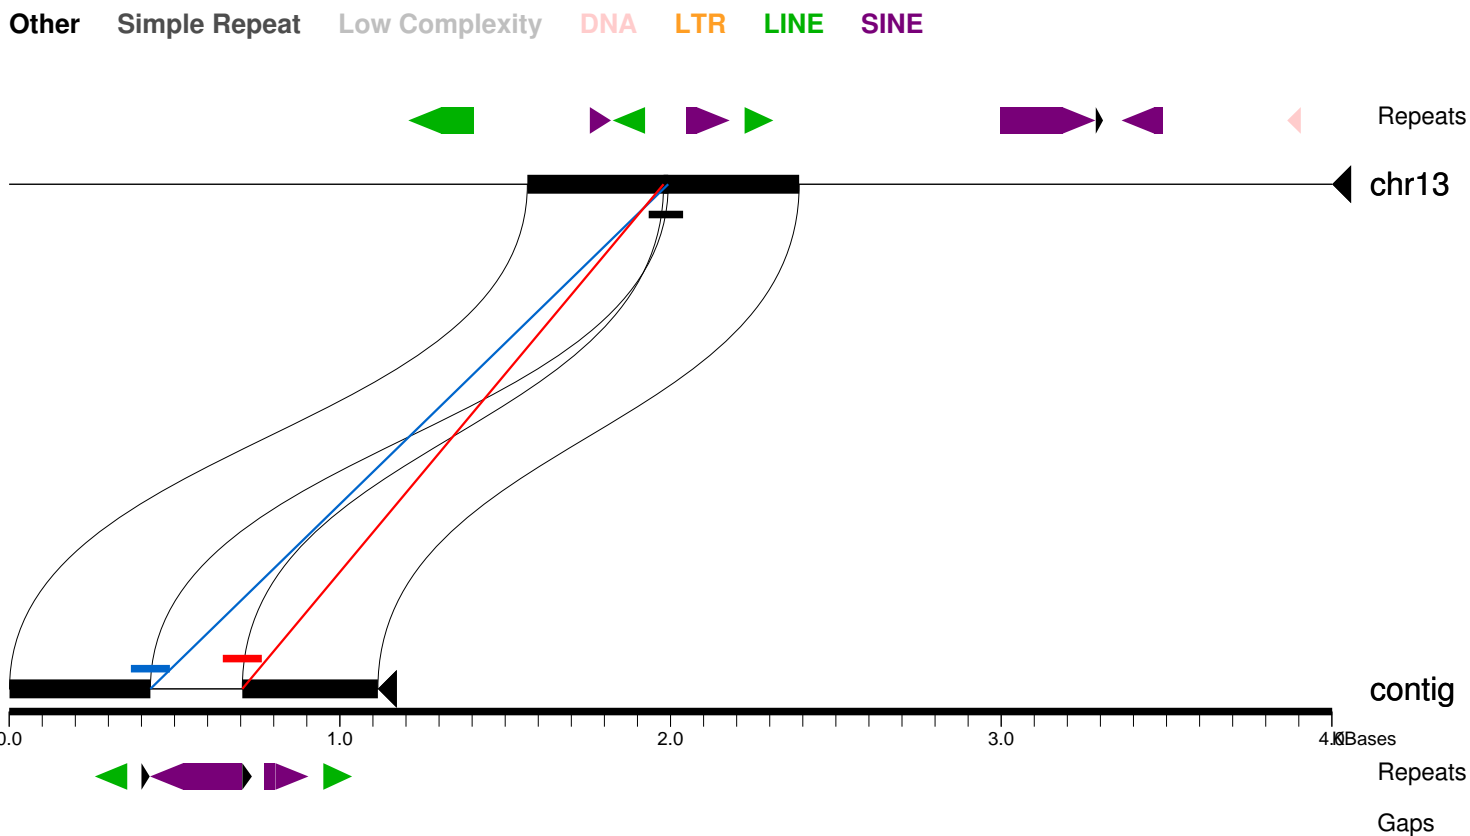





siteID: chr13\_59377694 Scaffig2 + Breakpoint: chr13:59377671

chr13:59377625-59377730

Overlap Length: 14 INS size: 304 Genotyped: Yes

```
left  GTATTCTTCCTGTGTTCTCA-----CTTGGG-----GGAG-GAGGCAAGGCTGCTTT--CTGGGGTCTCT
chrom GTATTCTTCCTGTGTTCTCA-----CTTGGG-----GGAG-GAGGCAAGGCTGCTTT--CTGGGGTCTCT
right CCGCCCGCCTCGGCCTCCCAAAGTGTGGGATTACAGGCGTGAGCCACCGCGCCCGGCCCTGGGGTCTCT
      11111*11*11*111*1*1*11111*1***11111*1*1***1*11*11*11111*****

left  TTTTTTTTTTTTTTTTTTTTTTTTTT-TGAGA-CGAGTCTCGCTCTGTCGCCCAGGCTGGAGTGC
chrom TTTATAAGGGCTCTAAACCTGTTTATGAGGTCTGAGTC---CTAATT-----ACTAA
right TTTATAAGGGCTCTAAACCTGTTTATGAGGTCTGAGTC---CTAATT-----ACTAA
      **2*222222*2*22222*2***2***22*2***222*222*22222222222*2*22
```

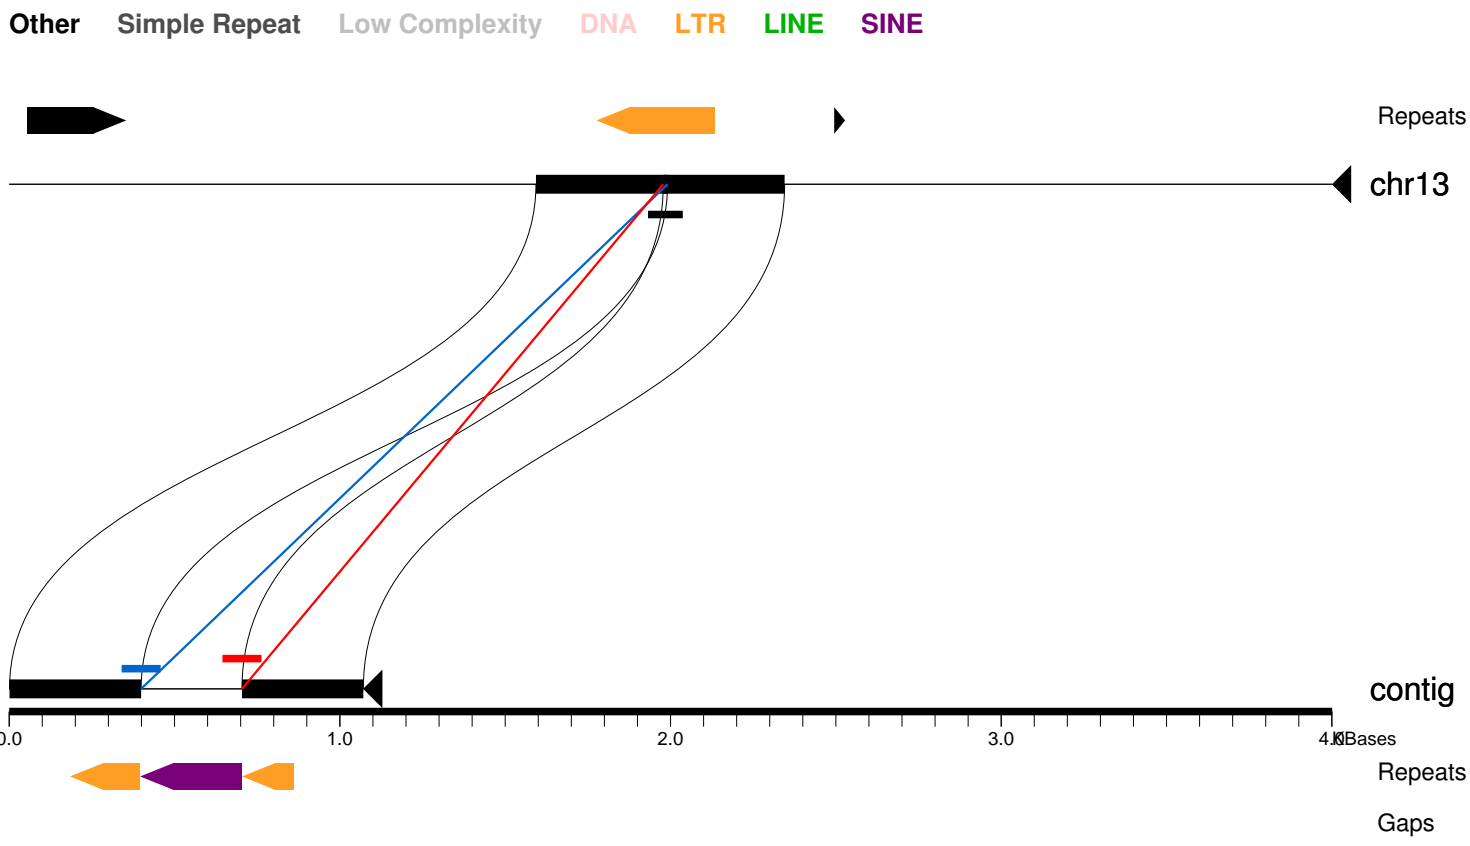

siteID: chr13\_59396866 Scafftig14 + Breakpoint: chr13:59396880

chr13:59396836-59396939

Overlap Length: 16 INS size: 300 Genotyped: Yes

```
left  GGGAA-----GTGTACTATTGTGTCCAGAATTGGTGCGG-----ACCTTGCAGT---GAGTGTACAG
chrom GGGAA-----GTGTACTATTGTGTCCAGAATTGGTGCGG-----ACCTTGCAGT---GAGTGTACAG
right CCGCCCGTCTCGGCCTCCCAAAGTGCTGGGATTACAGGCGTGAGCCACCGCGCCCGGCCGAGTGTACAG
      11*1111111111*11*1*1*11***1111*1*1111***111111***11*111111*****
```

```
left  TTCTTTTTTTTTTTTTTTTTTTTTTTTTTTGAGACGGAGTTTCGCTCTGTCGCCAGGCTGGAGTGCAG
chrom TTCTTAAAGATGGTATCTGGAGTTT-----TTCTTGTGATGTTCCGAC--GTGT----
right TTCTTAAAGATGGTATCTGGAGTTT-----TTCTTGTGATGTTCCGAC--GTGT----
      ***22222*22*2*2*2222***222222222***22*2*22*22*2*2*22*2*2222
```

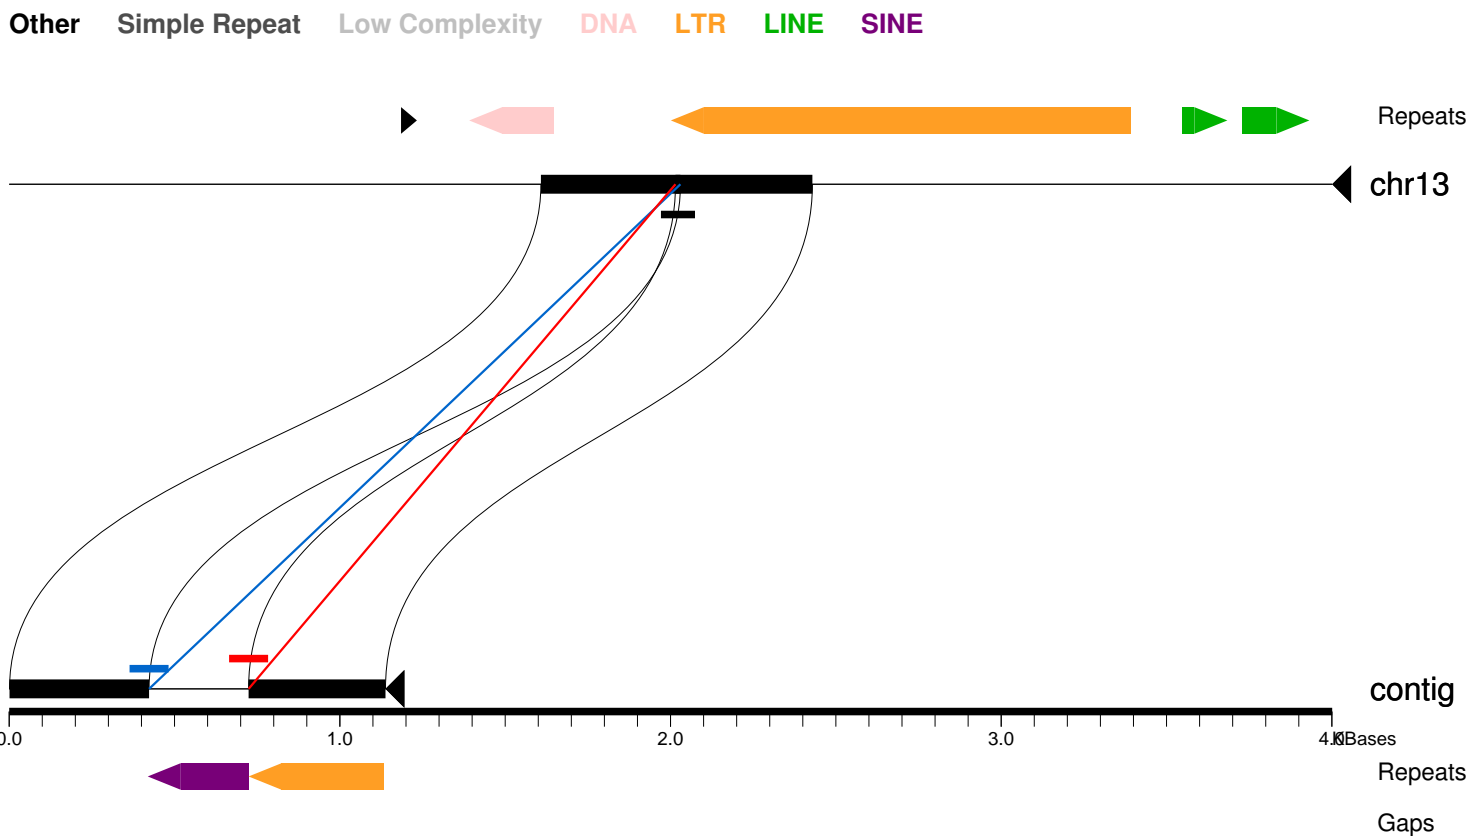

siteID: chr13\_60032504 Scafftig3 - Breakpoint: chr13:60032546

chr13:60032502-60032605

Overlap Length: 16 INS size: 99 Genotyped: Yes

```
left AAATA-ATTATGTG-----ATTGGACTGTGGATTATAATAAAGATTCTT-----AAAAGATGCTG
chrom AAATA-ATTATGTG-----ATTGGACTGTGGATTATAATAAAGATTCTT-----AAAAGATGCTG
right CACTCCAGCCTGGGCGACAGAGCGAGACTCCGTCTCAAAAAAAAAAAAAAAAAAAAAAAAAAAAAAAA AAAAGATGCTG
1*1*11*111**1*111111*1111****11*11*1*1**1***1*1111111111111111*****
```

```
left GGAACCGGGAGGCGGAGCCTCCAGTGAGCCGA-GATCCCGCCACTGCACTCCAGCCTGGGCGACA
chrom GGAACCACAGTAGAAAAAAGTTCCGTTTCTCTGAAGATG-----TCAA---TGATAGA-A
right GGAACACAGTAGAAAAAAGTTCCGTTTCTCTGAAGATG-----TCAA---TGATAGA-A
****222*22*222*222***22*222*2**2***222222222222222**2*222**222**2*
```

Other Simple Repeat Low Complexity DNA LTR LINE SINE

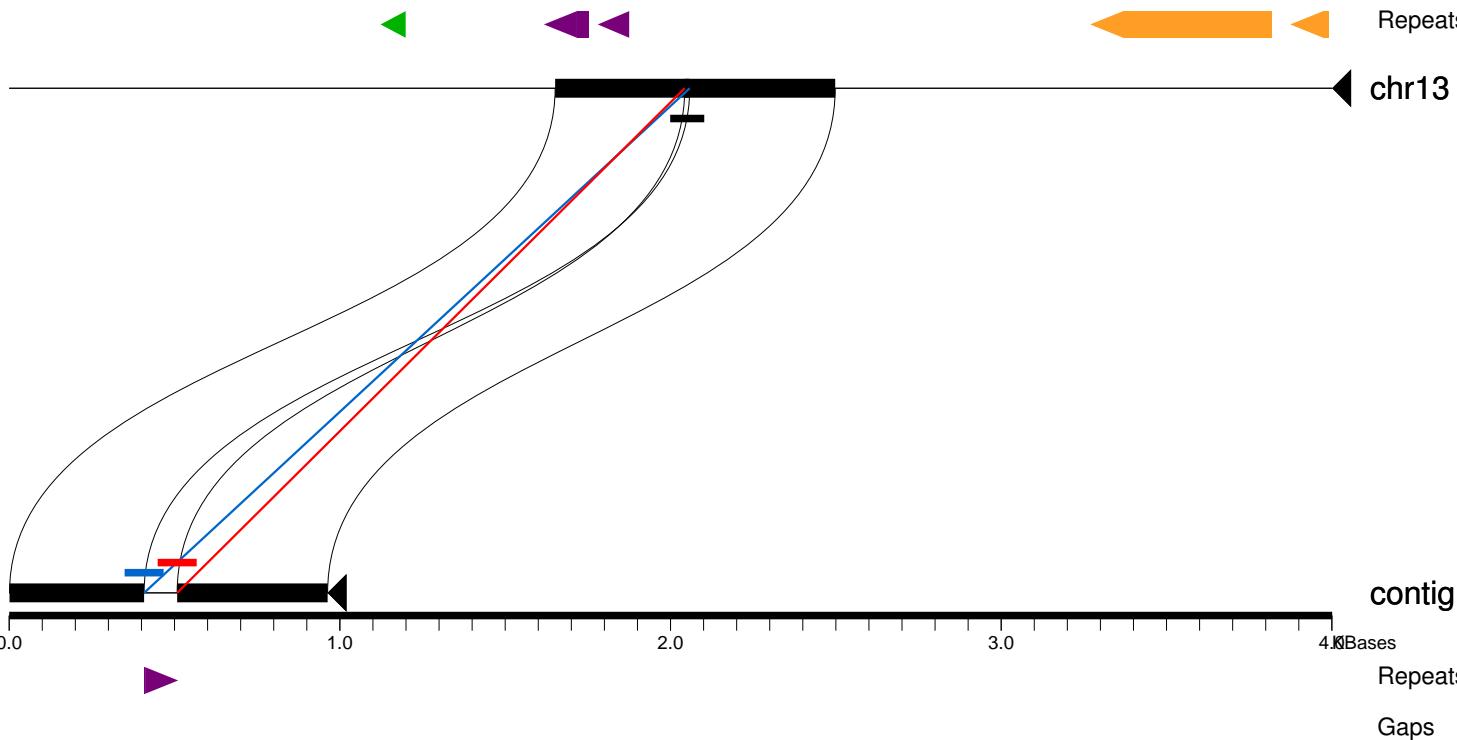



siteID: chr13\_61162460 Scafftig1 + Breakpoint: chr13:61162457

chr13:61162413-61162516

Overlap Length: 16 INS size: 300 Genotyped: Yes

```
left  TTATTATTAAACTCAG--TCACAATTCAT----TTAAAAATCATGA--CATT-----TTAAATGA
chrom TTATTATTAAACTCAG--TCACAATTCAT----TTAAAAATCATGA--CATT-----TAAATGA
right CCACCCGC---CTCGGCCTCCCAAAGTGCTGGGATTACAGGCGTGAGCCACCGCGCCCGGCCCTAAATGA
      11*111111111***1*11**1***11*11*1111***1*11*1***11**1111111111111*****
```

```
left  ACTTTTTTTTTTTTTTTTTTTTGGAGACGGAGTCTCGCTCTGTCGCCAGGCCGGACTGCGGACTGCAGT
chrom ACTGTTTTTAAAGT-----GGCCAAATGT-GCAATTTA---AATTTCTTA-TAAACTCT-CTCT
right ACTGTTTTTAAAGT-----GGCCAAATGT-GCAATTTA---AATTTCTTA-TAAACTCT-CTCT
      ***2***2222*222222222*2*22*2*2*2**22*2*22222*222*22*2*22222**2*22*
```

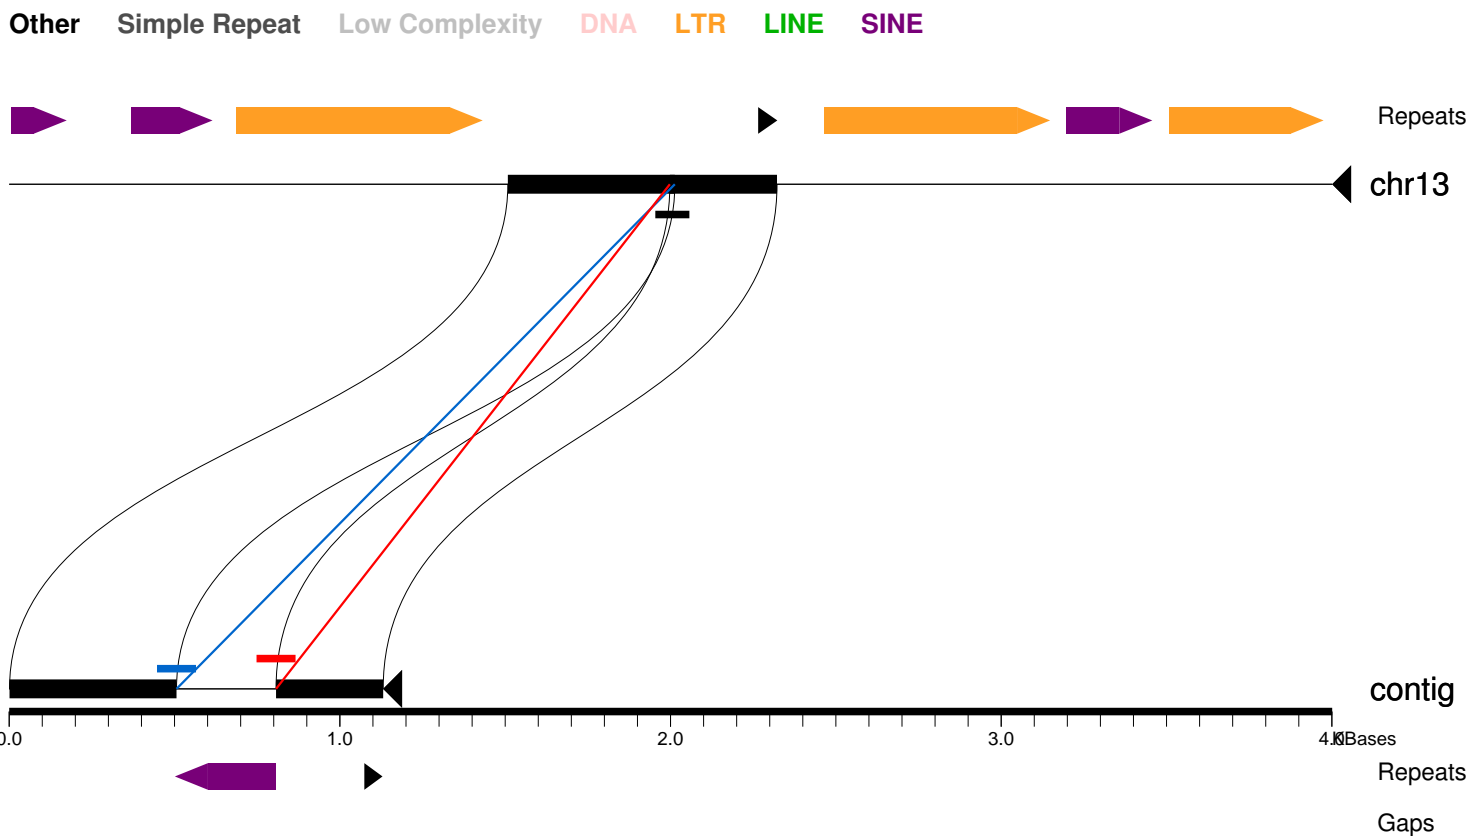



siteID: chr13\_61367403 Scafftig1 - Breakpoint: chr13:61367395

chr13:61367349-61367454

Overlap Length: 14 INS size: 293 Genotyped: Yes

```
left  GGTGAAGATGCTTATTTTC--CATATCTTCCAGA---AGTAACTGTC-----AGTCAAAAAGCATT
chrom GGTGAAGATGCTTATTTTC--CATATCTTCCAGA---AGTAACTGTC-----AGTCAAAAAGCATT
right A-TCCCGCCACTGCACTCCAGCCTGGGCAACAGAGCGAGACTCTGTCTCAAAAAAAAAAAAAAATAAAGCATT
      11*111*111**1111*1*11*1*111111****111**111*****111111111*111******
```

```
left  TGTGGGCCGGGCGCGGTGGCTCACGCCTGTAATCCAGCACTTTGGGAGGCCGAGGCGGGCGG
chrom TGTGAACACTT-GCTGTGGAT-ACTGCTGGGAT-----AAT---GGAGGAAGTGAAGATC--
right TGTGAACACTT-GCTGTGGAT-ACTGCTGGGAT-----AAT---GGAGGAAGTGAAGATC--
      ***22*22222**2****2*2**22**22**222222*2*222*****22*2*22*22*22
```

Other Simple Repeat Low Complexity DNA LTR LINE SINE

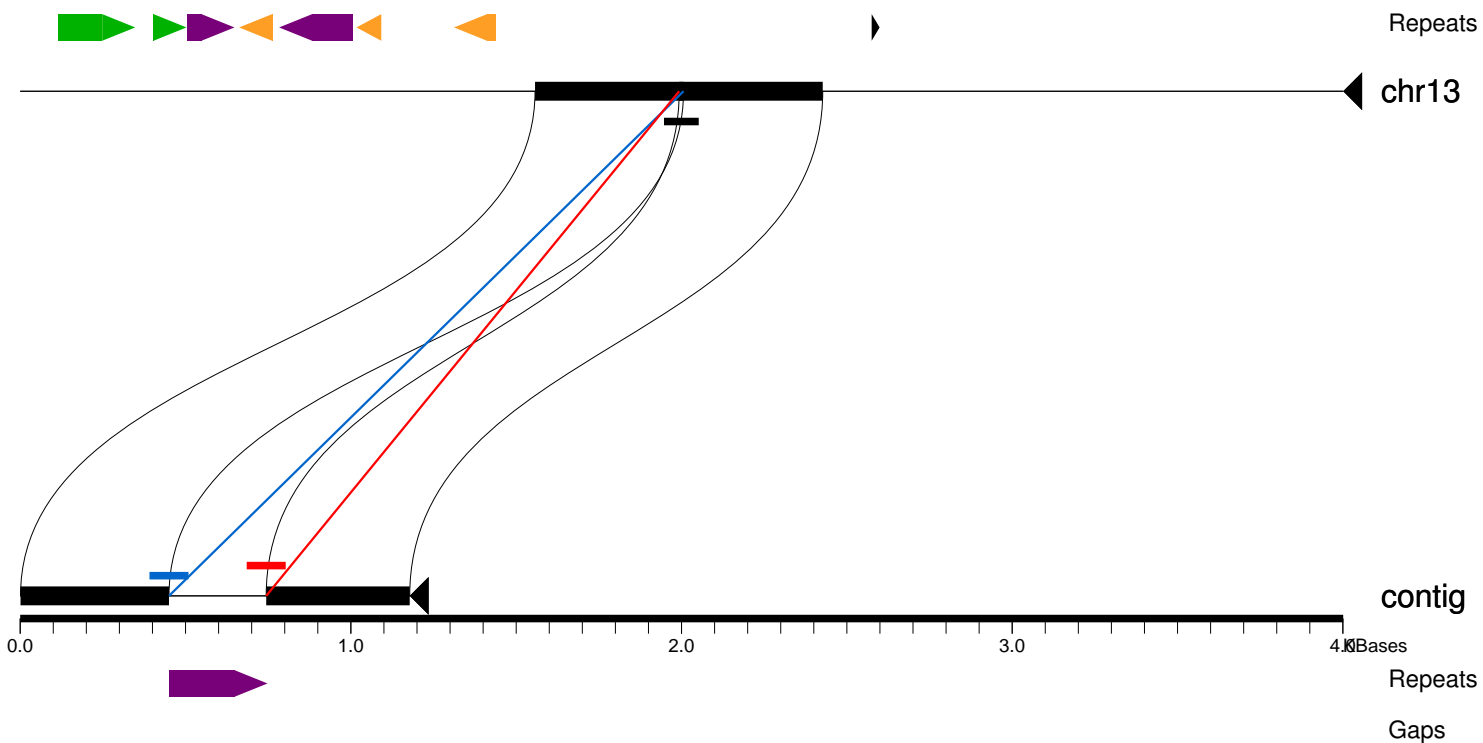

siteID: chr13\_61676098 Scaffitg1 - Breakpoint: chr13:61676093

chr13:61676047-61676152

Overlap Length: 14 INS size: 141 Genotyped: Yes

```
left  -----CAAAAATGTG----TATGTCT--AATTCACTGCATATATGTAGAAAGTTTATAAAAAGTGGTTA
chrom -----CAAAAATGTG----TATGTCT--AATTCACTGCATATATGTAGAAAGTTTATAAAAAGTGGTTA
right GCCTGGGCGACAGAGCGAGACTCCGTCTCAAAAAAAAAAAAAAAAAAAAAAAAAAAAAAAAAAAAAAATAAAAAGTGGTTA
      11111111*1*1*11*1*11111*11****11**111*11111*1*1*111*1**11111*1*****
left  GCTACTTGGGAGGCTGAGGCAGGAGAATGGCGTGAACCCGGGAGGCAGAGCTTGCAGTGAGC
chrom GCT--TTCAGAAATCCATCCC-----TCGATTCTACTATGAATGCAAAGCTTCTC-----C
right GCT--TTCAGAAATCCATCCC-----TCGATTCCACTATGAATGCAAAGCTTCTC-----C
      **22**22**22222*22*2222222*2*22*2N**222*2*2***2*****22222222*
```

Other Simple Repeat Low Complexity DNA LTR LINE SINE

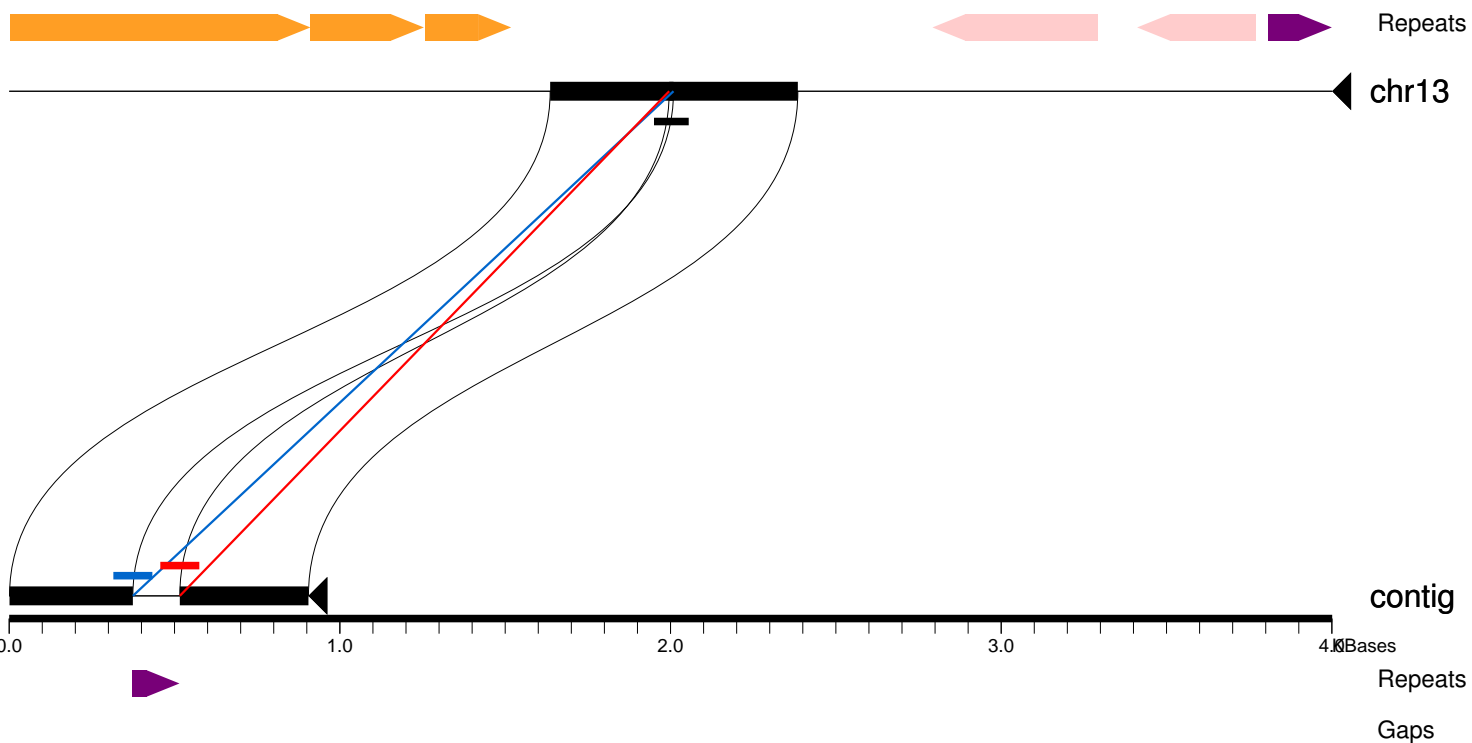



**siteID: chr13\_61787416 Scaffig1 + Breakpoint: chr13:61787402**  
**chr13:61787243-61787578**  
**Overlap Length: 17 INS size: 306 Genotyped: Yes**

```

left  -A-----CTTTAATGCTTTGAAAAGCATTGAAAAATAAACTTATTTCCTTCAAAAACTCTAT
chrom -AGTTCACCTGTAACCTTAACCTTTAATGCTTTGAAAAGCATTGAAAAATAAACTTATTTCCTTCAAAAACTCTAT
right GAGAATGGCGTGA---ACCCGGGAGGCGGAGCTTGCAGTGAGCCGAGA-----TCCC GCCACTGCACT--
      1*2NNNNNN22N2    2N*1111*1**111*111***1***1111*1*11111***11*1*111*1**11

left  TAACCACCAAAAAACATTAATATGCTTCAAAATCCCATGAAGTAAATGCATTAAACTTCAGGAAAAACATGA
chrom TAACCACCAAAAAACATTAATATGCTTCAAAATCCCATGAAGTAAATGCATTAAACTTCAGGAAAAACATGA
right ---CCAGCCTGGGCGACAGAGCGAGACTCCCTCTCAGAAAAAAAAAAAAAAAAAAAAA-----AAAAAA---
      111***1*11111*111*1111*111*1111**1**11**21***11N*11***1111111***1*111

left  GGCTTATTAAGTTAGTGTGTAAAATTTAATTATTTTGGCCGGGCGCGG-----TGGCTCACGCCT
chrom GGCTTATTAAGTTAGTGTGTAAAATTTAATTATTTTATTATATAGAGTATAAAACATACTGTATAAAATTTT
right -----AAAATTTAATTATTTTATTATATAGAGTATAAAACATACTGTATAAAATTTT
      1111111111111111111111111*222222*2*222222222222*22*2*2222*

left  GT----AATCCAGCACTTT-----GGGAGGCCGAGGCGGGCGGATCACGAG-----GTCAG
chrom TTTTAAAAAGATGATAAATTTACAGTCAAATGGTAGGTTCTGAGAGGAGTTTAAAATAGTACTTTGTGTACT
right TTTTAAAAAGATGATAAATTTACATTCAAATGGTAGGTTCTGAGAGGAGTTTAAAATAGTACTTTGTGTACT
      2*2222*2222*22*****222N222222**2***2222*222*2*22*2*22**22222222**222

left  GAGATCGAGACCATCCC--GGCTAAAATGGTGAAACCCCGTCTCTACTAAA-----
chrom TAGGTAAAATGGTCTCCTCTGGAAAAAACGAT--ATCAGAGTTGAAAGAAAAAAGTACAT
right TAGGTAAAATGGTCTCCTCTGGAAAAAACGAT--ATCAGAGTTGAAA-----
      2**2*22*22222***222*22***2*2*22*2*222**2222*NN111

```

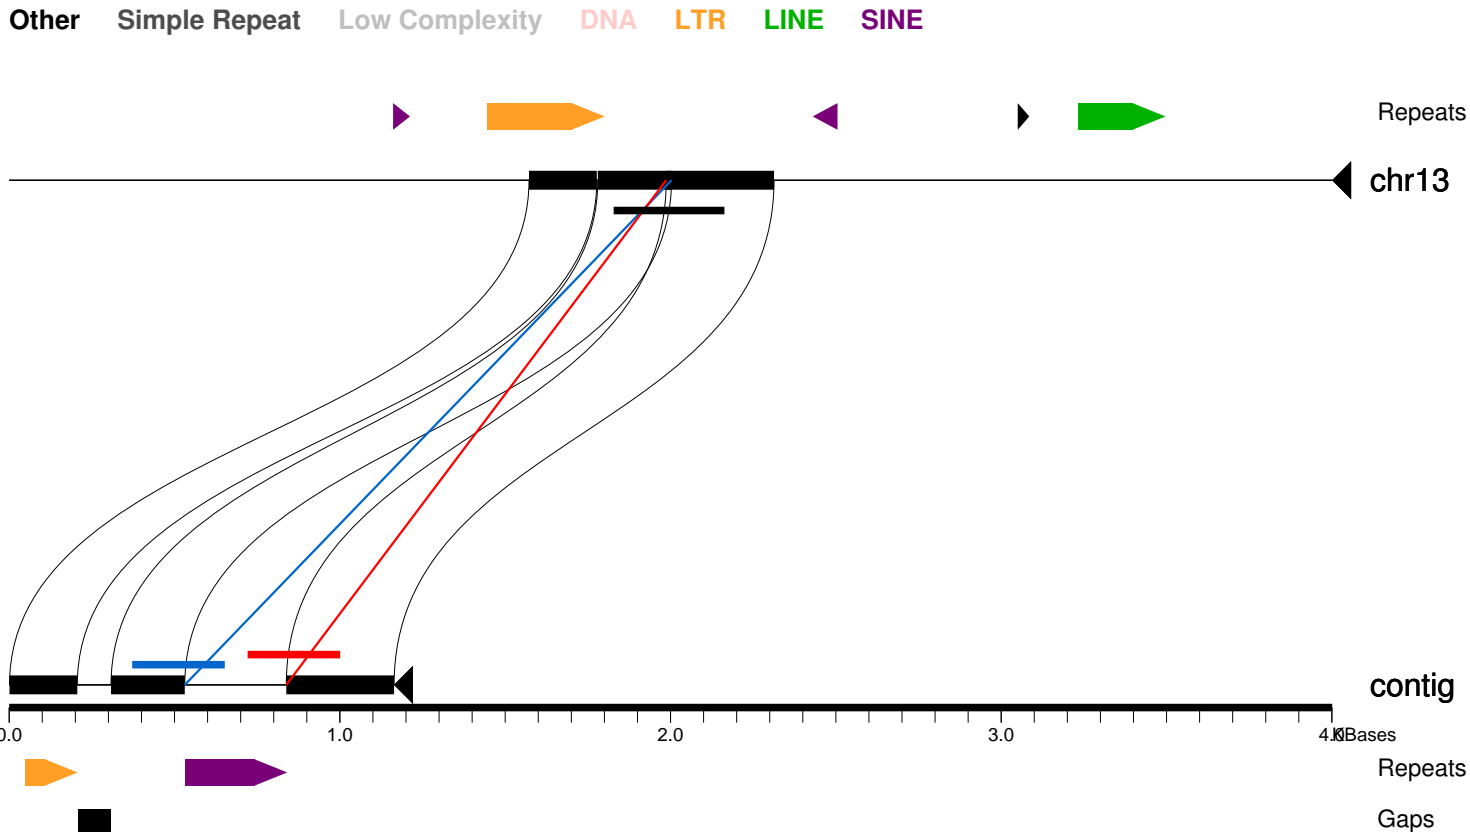

siteID: chr13\_62588978 Scafftig3 + Breakpoint: chr13:62588959

chr13:62588913-62589018

Overlap Length: 14 INS size: 292 Genotyped: Yes

```

left      TACACACATTATTTTTATTCCTCCTCAAAAAACAAGTTTT--TGTATGA-----CCGTTC
chrom     TACACACATTATTTTTATTCCTCCTCAAAAAACAAGTTTT--TGTATGA-----CCGTTC
right     C-CGCCCCGCC---TCGGCCTCCCAAAGTGCTGGGATTACAGGCGTGAGCCACCGCGCCCCGCCCGGTTC
           11*1*1*1111111*1111***1***1111111*1**1111*11***11111111111111111*
left      ATGTTTTTTTTTTTTTTTTTGAGACGGAGTCTCGCTCTGTCGCCAGGCTGGAGTGCAGTGGCGGGATC
chrom     ATGTTTTTACATGGCAT---GATGACCACT-GAATTGTAA--CATTCTGTTCT----TGGTGGA---
right     ATGTTTTTACGTGGCAT---GATGACCACT-GAATTGTAA--CATTCTGTTCT----TGGTGGA---
           *****22N*2222*222**2*2222**2*222***2222**22***222*2222***2**2222
    
```

Other   Simple Repeat   Low Complexity   DNA   LTR   LINE   SINE

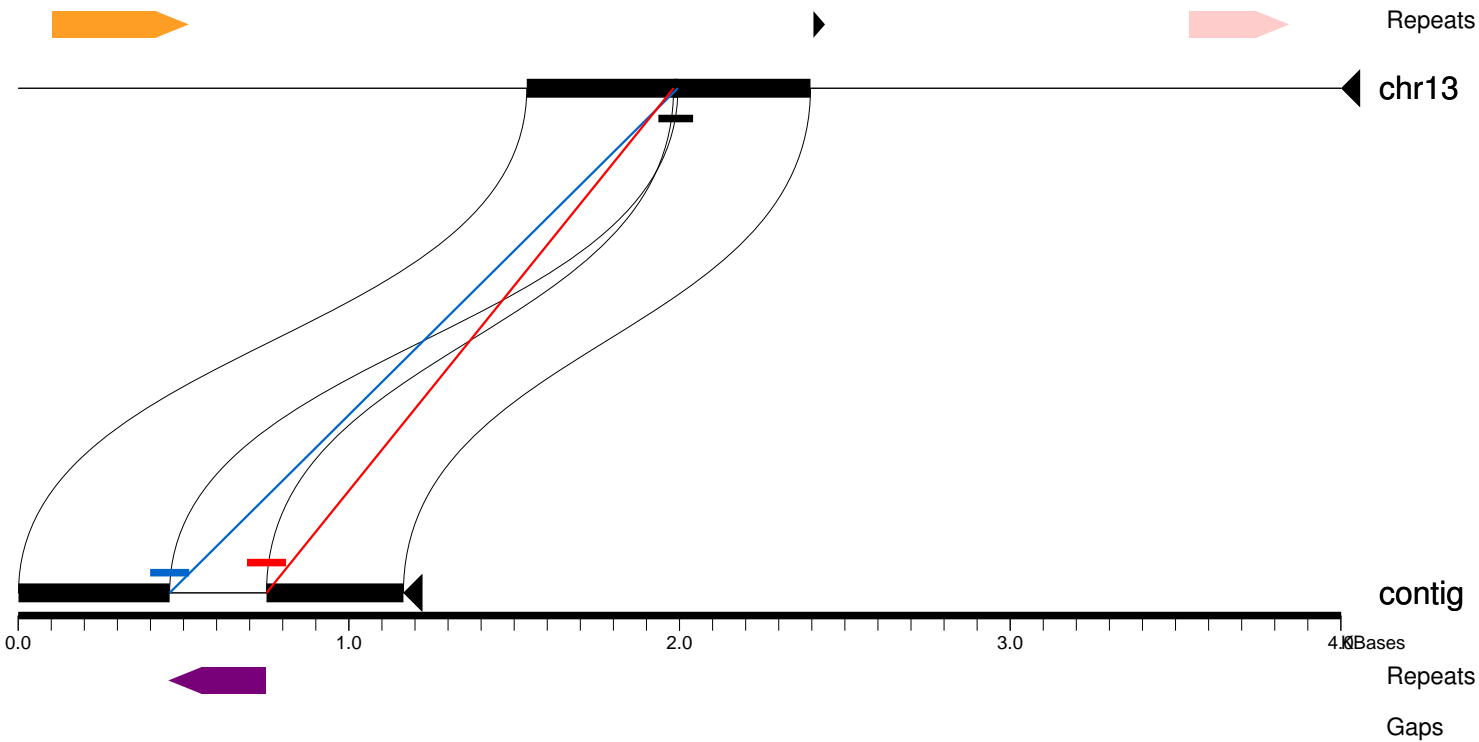

siteID: chr13\_62721066 Scafftig2 - Breakpoint: chr13:62721066

chr13:62721015-62721125

Overlap Length: 9 INS size: 300 Genotyped: Yes

```
left  CCCT-ACTCC--TCAGAACCAATTTTCTGTGATAGGAC-----ATTTTGTATTGTTATAAAGAAATAGG
chrom CCCT-ACTCC--TCAGAACCAATTTTCTGTGATAGGTC-----ATTTTGTATTGTTATAAAGAAATA--
right ACTGCACTCCAGCCTGGGCGACAGAGCGAGACTCCGTCTCAAAAAAAAAAAAAAAAAAAAAAAAAAAAGAAATA--
      1*1111*****111*1*11*1*11111*11111*11*2*11111*1111111*11111*1*****22
```

```
left  CCGGGCGCGGTGGCTCACGCCTGTAATCCAGCACTTTGGGAGGC---CGAGGCGGGCGG
chrom -CCTGAGTGATTTATAAAG-----AAA---AGGTATTTAATTGACTCACTATTCCGTAGG
right -CCTGAGTGATTTATAAAG-----AAA---AGGTATTTAATTGACTCACTATTCCGTAGG
      2*22*2*2*2*222*2*2*22222**2222**222***2222*2*222*2*22*2*22**
```

Other Simple Repeat Low Complexity DNA LTR LINE SINE

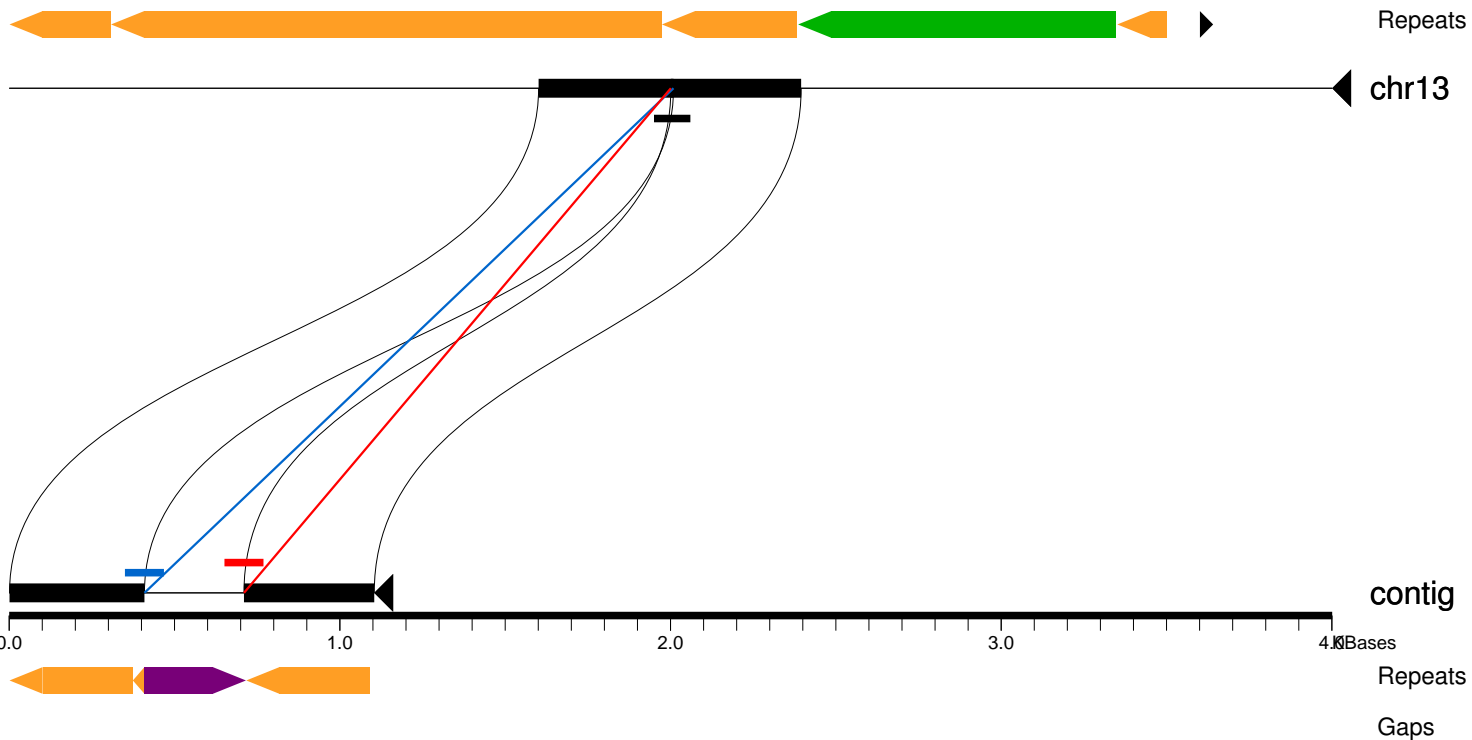

siteID: chr13\_63488242 Scaffoldig3 - Breakpoint: chr13:63488266

chr13:63488219-63488325

Overlap Length: 13 INS size: 444 Genotyped: No

```

left   ATATATCTTCTGCAGTTTCACAAGCTAAATTGTCAACTTCAGGTC-----ATAAAAAATCACTG
chrom  ATATATCTTCTGCAGTTTCACAAGCTAAATTGTCAACTTCAGGTC-----ATAAAAATCACTG
right  NNNNNNNNNNNNNNNNNNNNNNNNNNNNNNNNNNNNNNNNNNNNNNNNNNNNNNNNNNNNNNAAAAAAAAAAATCACTG
      1111111111111111111111111111111111111111111111111111111111111111111111*1*****

```

```

left   CTGGCCGGGC-GCGGTGGCTCACGCCGTGTAATCCCAGCACTTTGGGAGGCCGAGGCGGGCGG
chrom  CTATTTTGAAAGTGGATGCTGAC-----ATGGTCAGCGGTTA-----CCAGTTCCTCAT
right  CTATTTTGAAAGTGGATGCTGAC-----ATGGTCAGCGGTTA-----CCAGTTCCTCAT
      **22222*222*2**22***2**222222*2222****22**22222222*2**22222*22

```

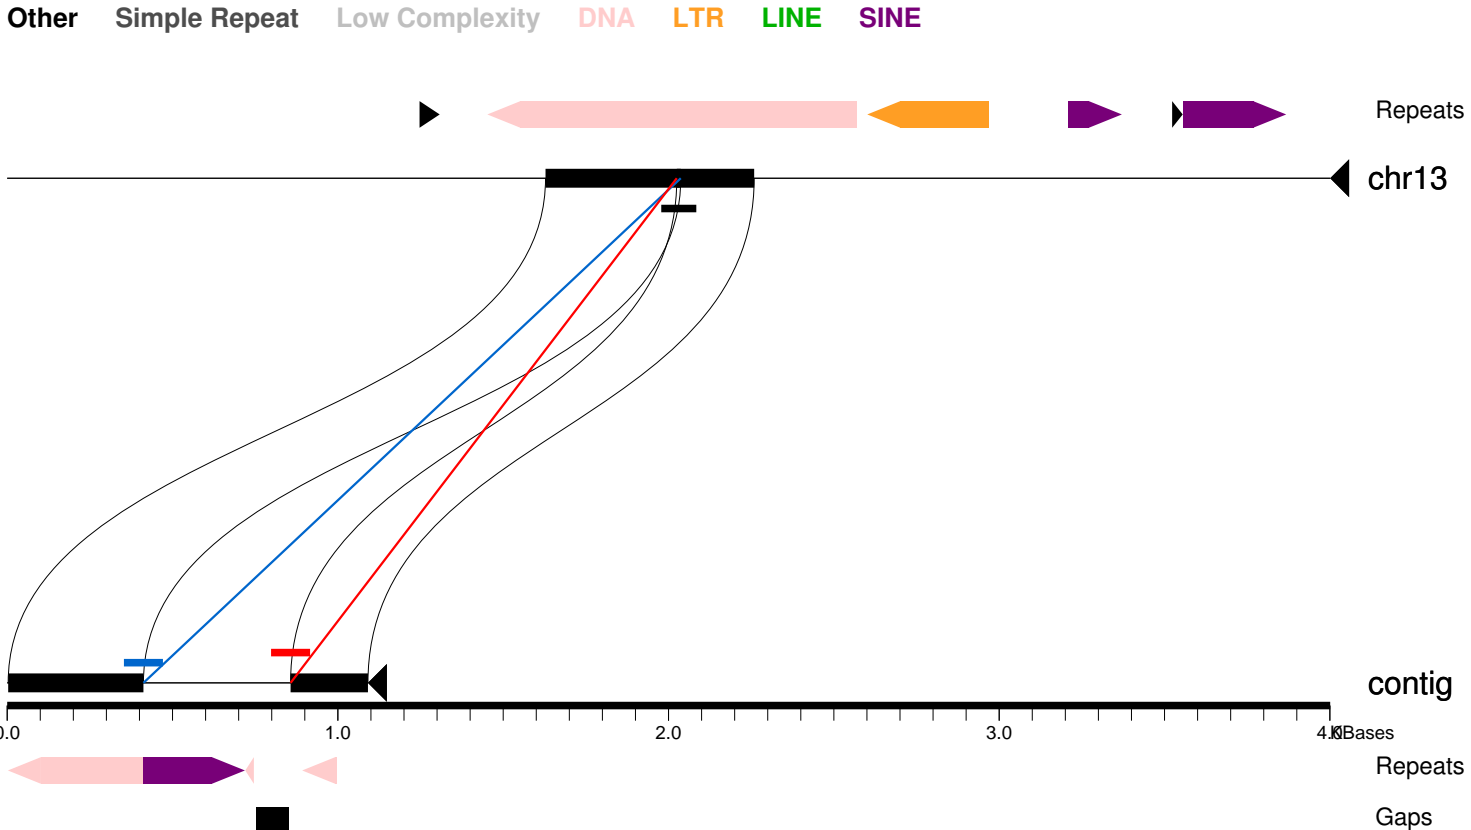



siteID: chr13\_65892986 Scafftig1 + Breakpoint: chr13:65892950

chr13:65892891-65893009

Overlap Length: 1 INS size: 419 Genotyped: No

```

left  GAAGACACTCTTTTGCAGTTATATATTAGAAAAGATTAAATGCTTTTTTTCAGTCGTCA---C NNNNNNNN
chrom GAAGACACTCTTTTGCAGTTATATATTAGAAAAGATTAAATGCTTTTTTTCAGTCGTCA---CTCAGACA
right TCC-ACCCGCCTCGGCC-TCCCAAAGT-GCTGGGACTACAGGCGTGAGCCACCGCGCCCGGCCTCAGACA
      1111**1*1*1*11**11*111*1*1*1*1111**1**1*1**1*111111111**1*1111*2222222

```

```

left  NNNNNNNNNNNNNNNNNNNNNNNNNNNNNNNNNNNNNNNNNNNNNNNNNNNNNNNNNNNNNNNNNNNNNNN
chrom CTTCTTAAACTAGAAAAGCCTGGGCTCATTATAGTTGAAGATAATGATTCTCT
right CTTCTTAAACTAGAAAAGCCTGGGCTCATTATAGTTGAAGATAATGATTCTCT
      22222222222222222222222222222222222222222222222222222222222222222222

```

Other    Simple Repeat    Low Complexity    DNA    LTR    LINE    SINE

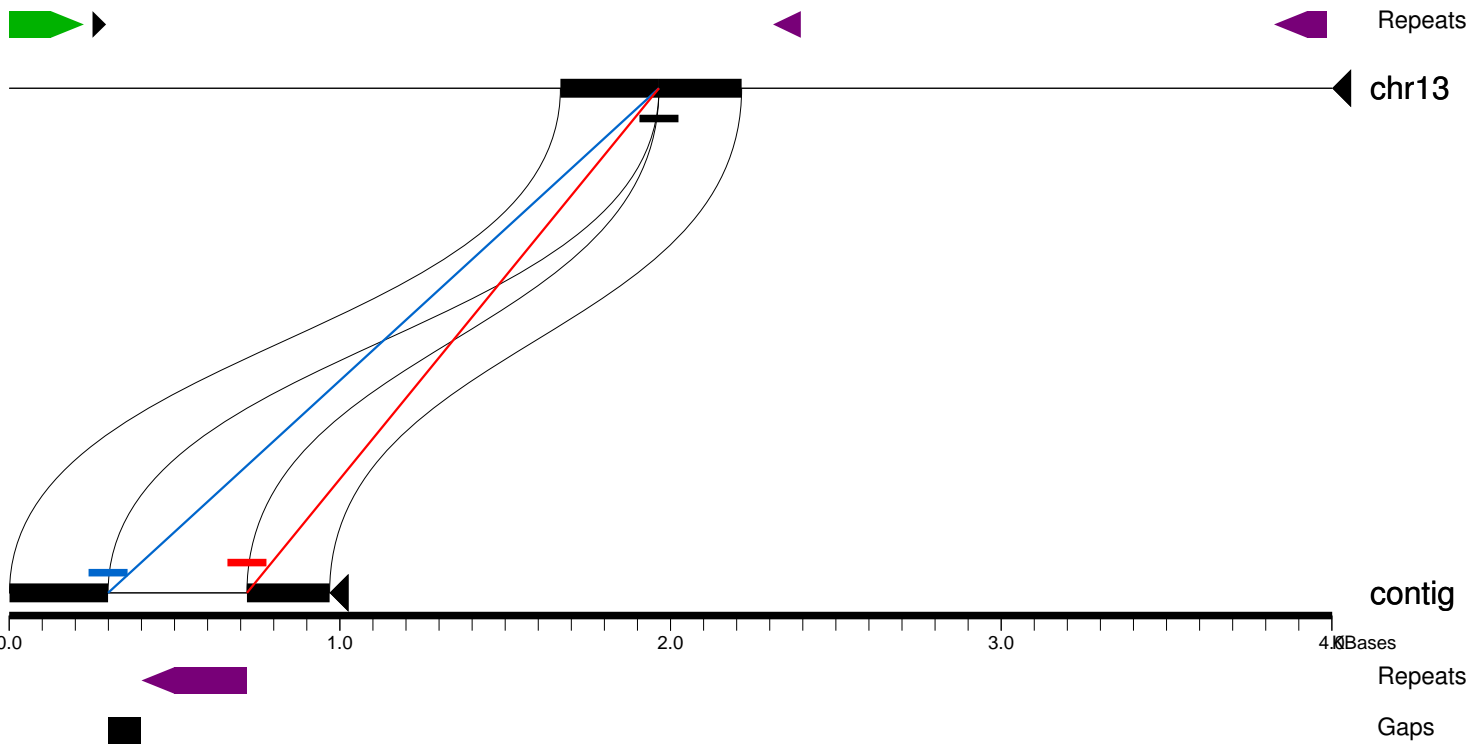

siteID: chr13\_66475610 Scafftig1 - Breakpoint: chr13:66475596

chr13:66475436-66475756

Overlap Length: 1 INS size: 419 Genotyped: No

```
left -----CTACTAGATGATTTTGGCTTTGTGGCTGTCGTAAGGCTGACAAAA
chrom TTCCCTTCCTTTTATTTTTTGTGCTTCTACTAGATGATTTTGTGCTTTGTGGCTGTCGTAAGGCTGACAAAA
right TT-----TAGTAGAGACGGGGTTTCACCGTG-----TTAGCCAGGATGGTCTCGATCTCCTGACC---
22      2NN22NNNNNN2N2N22*11*11*11111**1**111*11*1*1***11111*****1111
```

```
left GTTTTTATAGTTACAACCTGATTATTTTAAACTAAAAACAACCTTAACTCTAATGGCAAATAAAAATAAAAACA
chrom GTTTTTATAGTTACAACCTGATTATTTTAAACTAAAAACAACCTTAACTCTAATGGCAAATAAAAATAAAAACA
right -TCGTGATCCGCCCGCCTCGGCCTCCCAAAGTG-----CTGGGAT-TACAGGCG-----TGAGCCA
1*11*1**11111*11**11111*111***1*11111111**1111*1**11***11111111*1*11**
```

```
left CTTTCCATTTTTACTCCATTNNNNNNNNNNN-----
chrom CTTTCCATTTTTACTCCATTCCCTACATACATATTTTAAATTTCTGATGTCACAATAAACAAAAATAAAA
right CCGGCG-----CCGGCCCTACATACATATTTTAAATTTCTGATGTCACAATAAACAAAAATAAAA
*1111*1111111111**111*2222222222222222222222222222222222222222222222222222222
```

```
left -----
chrom ATAAATTAATATTCATATTTTTTAAATAATAATTTTGTCTTGAATCCTTTACACAAAAGATACAAGTGAT
right ATAAATTAATATTCATATTTTTTAAATAATAATTTTGTCTTGAATCCTTTACACAAAAGATACAAGTGAT
22222222222222222222222222222222222222222222222222222222222222222222222222
```

```
left -----
chrom TTATACACCACCATTACAGTAATAGAGTATTCTCAATTTGA
right TTATACACCACCATTACAGTAATAGAGTATTCTCAATTTGA
22222222222222222222222222222222222222222222222222222222222222222222222222
```

Other Simple Repeat Low Complexity DNA LTR LINE SINE

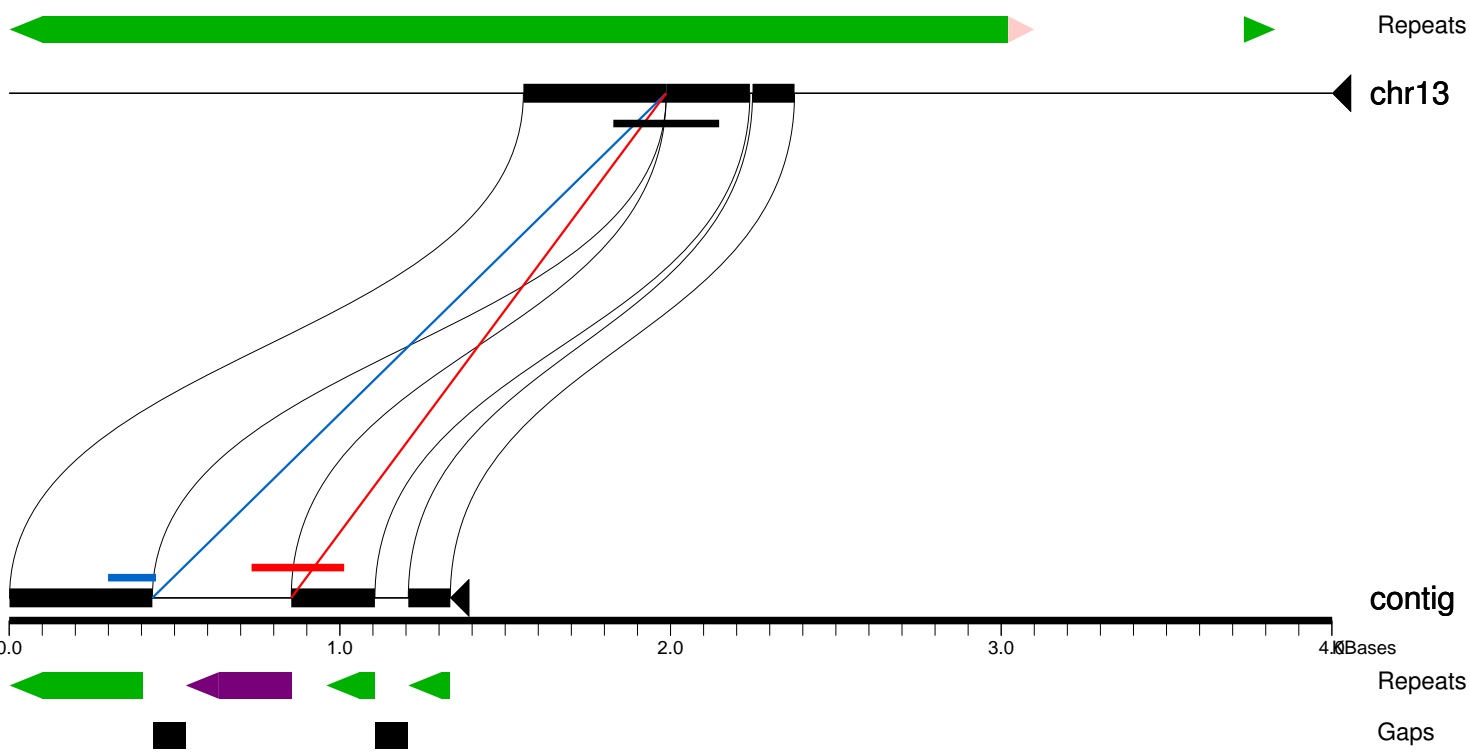

siteID: chr13\_67903458 Scaffitig9 - Breakpoint: chr13:67903455

chr13:67903412-67903514

Overlap Length: 7 INS size: 227 Genotyped: Yes

```
left  ATTCCTGGCCTGTTTTTCCATGGTATTCTCTAACACCT--TTTC-----TT-----TATCTATTTTT
chrom ATTCCTGGCCTGTTTTTCCATGGTATTCTCTAACACCT--TTTC-----TT-----TATCTATCTGT
right CGCCCGGCTAATTTTTTTGTATTTTTTAGTAGAGACGGGGTTTCACCGTGTTAGCCAGGAATATCTATCTGT
      111*1***111*****111*11*1**11111*1**1111****111111**11111111******2*2*
```

```
left  TTTTTTTTTTTTTTTTTTTTTTTTTTTTTTTTGGAGACGGAGTCTCGCTGTCGCCAGGCTGGAGTGCAGT
chrom ATTCTTAAACAT-----CCTTTATGAACCAGA---TCAACTTCAATCTT-CTGCAG---AAA
right ATTCTTAAACAT-----CCTTTATGAACCAGA---TCAACTTCAATCTT-CTGCAG---AAA
      2**2**2222*222222222222***2***22*2**222**2222**222*222***2**222*22
```

Other Simple Repeat Low Complexity DNA LTR LINE SINE

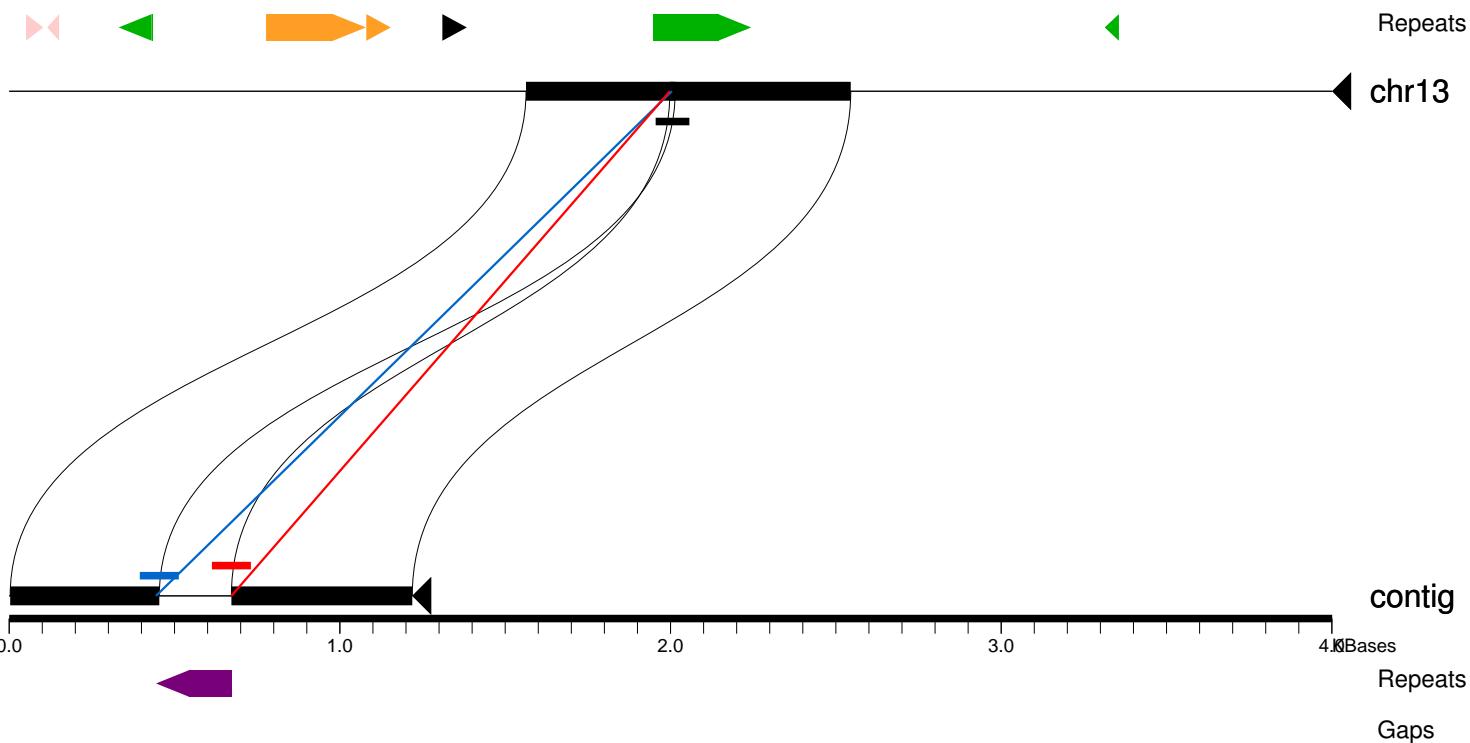



siteID: chr13\_67967172 Scafftig2 + Breakpoint: chr13:67967152

chr13:67967108-67967211

Overlap Length: 16 INS size: 314 Genotyped: Yes

```
left      -----TCTGTGGAACCCAACCATTTTCGC-TTATTTTCATAAAATGCCACCA-----ACATTCAGG
chrom     -----TCTGTGGAACCCAACCATTTTCGC-TTATTTTCATAAAATGCCACCA-----ACATTCAGG
right     CCACCCGCCTCGGCCTCCCAAAGTGCTGGGATTACAGGCGTGA--GCCACCGCGCCCGGCCACATTCAGG
           111111111**11*111*****11111*1*11***1111*1*1*11*****11111111111******
```

```
left      CTTTATTTTTTTTTTTTTATTTTATTTTTTTTTTTTGGAGACGGAGTCTCGCTCTGTGCGCCAGGCCGGA
chrom     CTTTATTTACCTCTTACATTATAACTGGTTTACTTCCCCAAACTCTAGC-CTC-----
right     CTTTATTACCTCTTACATTATAACTGGTTTACTTCCCCAAACTCTAGC-CTC-----
           *****222*2**2222*2*2*2*22***22*2222*22*2***2**2**22222222222222
```

Other Simple Repeat Low Complexity DNA LTR LINE SINE

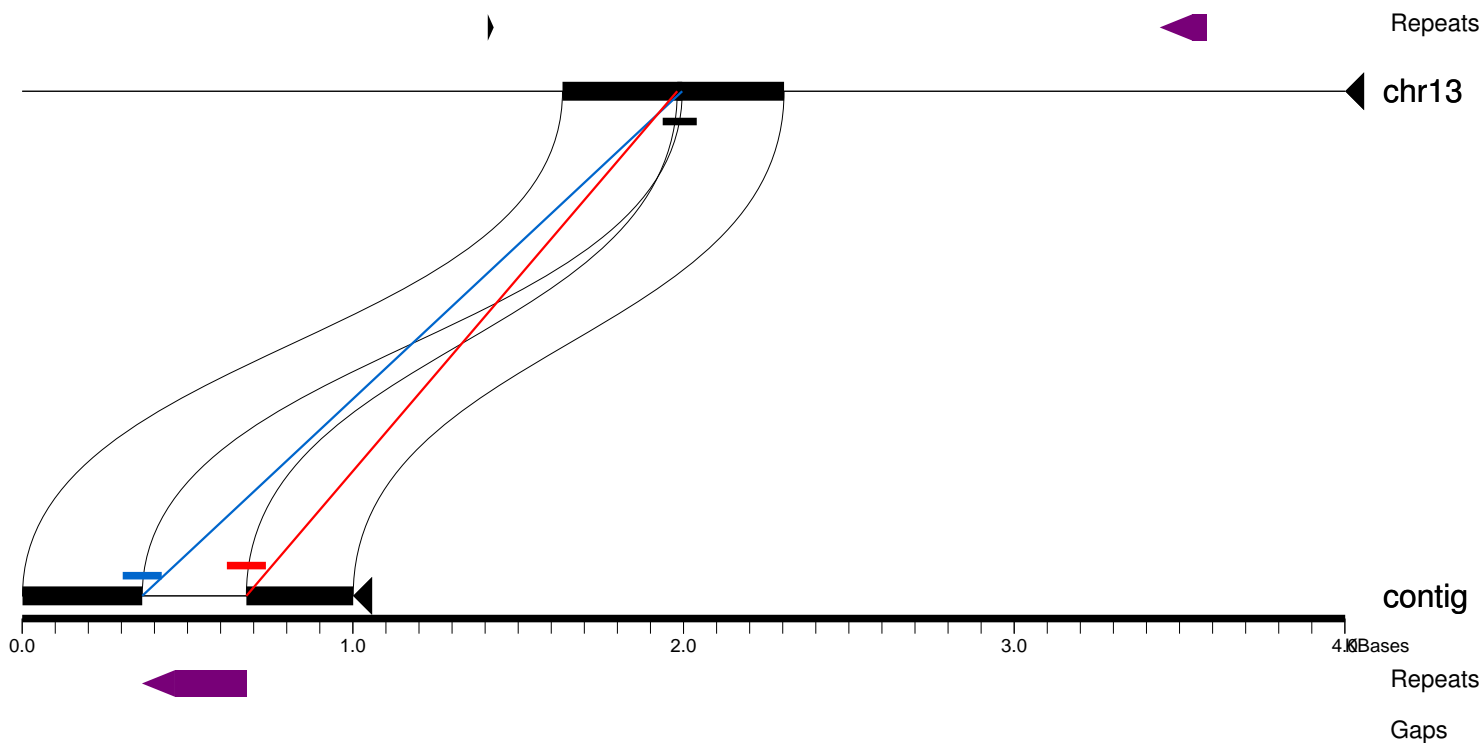



siteID: chr13\_69670749 Scafftig6 - Breakpoint: chr13:69670752

chr13:69670592-69670924

Overlap Length: 13 INS size: 145 Genotyped: Yes

```
left -----ATGCTAATAACTGGCAATAAAATTTAAAAATAGGTTAAATGGTGAAATCATTTATTTAAACAA
chrom TTCTGGTGGATGCTAATAACTGGCAATAAAATTTAAAAATAGGTTAAATGGTGAAATCATTTATTTAAACAA
right TTTTTTTTTTTT-----TTTGAGACGGAGTC-----TCGCTCTGTCCGCCA
22N2NN2NN1*11111111111111111111***1*1*1111**111111111111**11*111*111*1*
```

```
left TGTTGAACAAATTTATCTACTGA-AGTACTTTTCAGA-CATTTTAAGATGTGACTGTGTTGTATATTTTA
chrom TGTTGAACAAATTTATCTACTGA-AGTACTTTTCAGA-CATTTTAAGATGTGACTGTGTTGTATATTTTA
right GGCTGGAG-----TGCAGTGGCAGGA--TCTCGGCTCACTGCAAGCTCCGCCTCCCGGGTTCACGCCA
1*1**1*111111111*11*1**11**1*11*1**1*11**1*11**1*11**1*11**1*11**1*11**1*11111*11*1111*
```

```
left AGTGACTACAGTCAGTATTTGTCATTCATTCCTTTT-----TTT-----TTTTTTTTTTTTTTTT
chrom AGTGACTACAGTCAGTATTTGTCATTCATTCCTTTTACAGAGAGAATGTGCAAGCATTTTTCTTCTTTTAA
right TTCTCCTGCC-TCAGCCTCCCACTTCATTCCTTTTACAGAGAGAATGTGCAAGCATTTTTCTTCTTTTAA
11111**1*11***11*1111*****222222222*2*222222*****2**2***22
```

```
left TTTTTTTTTTTTTTTTTTTTGGAGACGGAGTCTCGCTCT-----GTCGCCAGG-----CTGGAGTGCA
chrom TCAAGTACATGTATTTAGCACAGCAATGAAGCTATAATATAGTCAAAAAAGAGAATTTTTCTCTAAAAATATT
right TCAAGTACACGTATTTAGCACAGCAATGAAGCTATAATATAGTCAAAAAAGAGAATTTTTCTCTAAAAATATT
*2222*22212*2***2*2222*2*2*222***2*22222***2222*2222222222**22*2*222
```

```
left GTGGCAGG-ATCTCGGCT-CACT--GCAA--GCTCCGCCTCCCGGGTT-----
chrom CTTCCAAATAACTCACCTACATTAAGAAAAATGCTGAGCACCAATTGAGACACCAA
right CTTCCAAATAACTCACCTACATTAAGAAAAATGCTGAGCACC-----
2*22**222*2***22**2**2*22*2**22**22**22**22*NNNN1NN
```

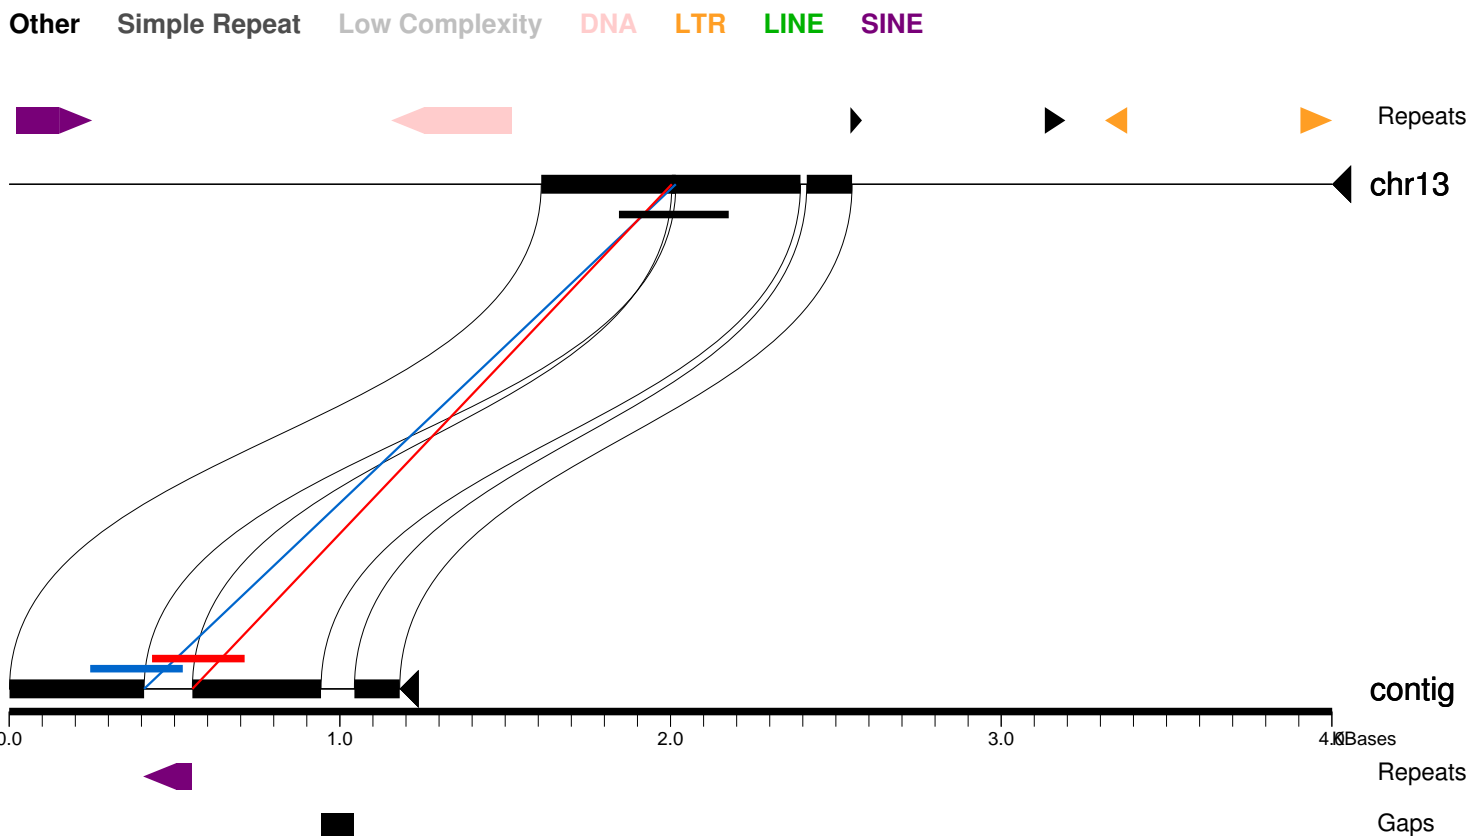

siteID: chr13\_70056940 Scaffitg1 - Breakpoint: chr13:70056950

chr13:70056790-70057121

Overlap Length: 12 INS size: 315 Genotyped: Yes

```
left -----TCATGCGTCACGTAGTTCTCGTGCCATGGTTTTTCAGCTCCATCAAGTCATTTGAGGTCTTCTCT
chrom GCTTGTTCATGCATCACGTAGTTCTCGTGCCATGGTTTTTCAGCTCCATCAAGTCATTTGAGGTCTTCTCT
right TTTAGTAGAG-----ACGGGGTT-TCA--CCGTGTTAGCCAGG---ATG--GTC--TCGA-----TCTCC
NN2N2211*111N11***11***1**111**1**1*111***1111**111***11*1**11111****1
```

```
left ACACTGTTTATTCTAGTTAGCCATTCATCTCATCTTTTTTCAAGGTTTTTGTAGCTTCTTTGTGATGGGTTC
chrom ACACTGTTTATTCTAGTTAGCCATTCATCTCATCTTTTTTCAAGGTTTTTGTAGCTTCTTTGTGATGGGTTC
right TGAC-----CTCGTGATCCGCCACCTCGGCCTCC--CAAAGTGCTGGGATTACAAGCG-TGAG---
11**111111111**1**1*1**111**1***11*1*1111***1**11*11*1**1111*1*1**1*111
```

```
left AAACATCCTCCTTTAGCTTGGAGAAGTTTAT--TATTTAT-----TTATTTATTTATTTAT--
chrom AAACATCCTCCTTTAGCTTGGAGAAGTTTATTTATTACCGATCGTCTGAAGCCTTCTCTCTCAACTCTTCA
right ---CCACCGCGCCCGCC--GAGAAGTTTATTTATTACCGATCGTCTGAAGCCTTCTCTCTCAACTCTTCA
111*11**1*111111**111*****22**222**2222222222**2*2*2*22*2*22*22
```

```
left ---TTATTTTTTTGAGACGGAGTCTCGCTCTGTGGCCC---AGGCG-----GGAGT-GCAGTGG
chrom AAGTCATTCTCTGACA---AGCTTTGTTCTGTTGCTGGTGAGGAGCTGCATTCTTTGGAGGAGAAGAGG
right AAGTCATTCTCTGACA---AGCTTTGTTCTGTTGCTGGTGAGGAGCTGCATTCTTTGGAGGAGAAGAGG
222*2***2*2***2*222**22*2*2*****2**22222***2*2222222222222222***22*2**2**
```

```
left TGC-----AATCTCGGCT-----CACTGCAAGCTCCGCCTCCAGGGTTTCAC
chrom TGCTCTGATTTTTAGAAATTTTCAGCTTTTCTGCTCTGGTTTTCTCCCCATC-----TTTGT
right TGCTCTGATTTTTAGAAATTTTCAGCTTTTCTGCTCTGGTTTTCT-----
***2222222222222*2*2**2***222222*2***2222*11N1N112222211NNN
```

Other Simple Repeat Low Complexity DNA LTR LINE SINE

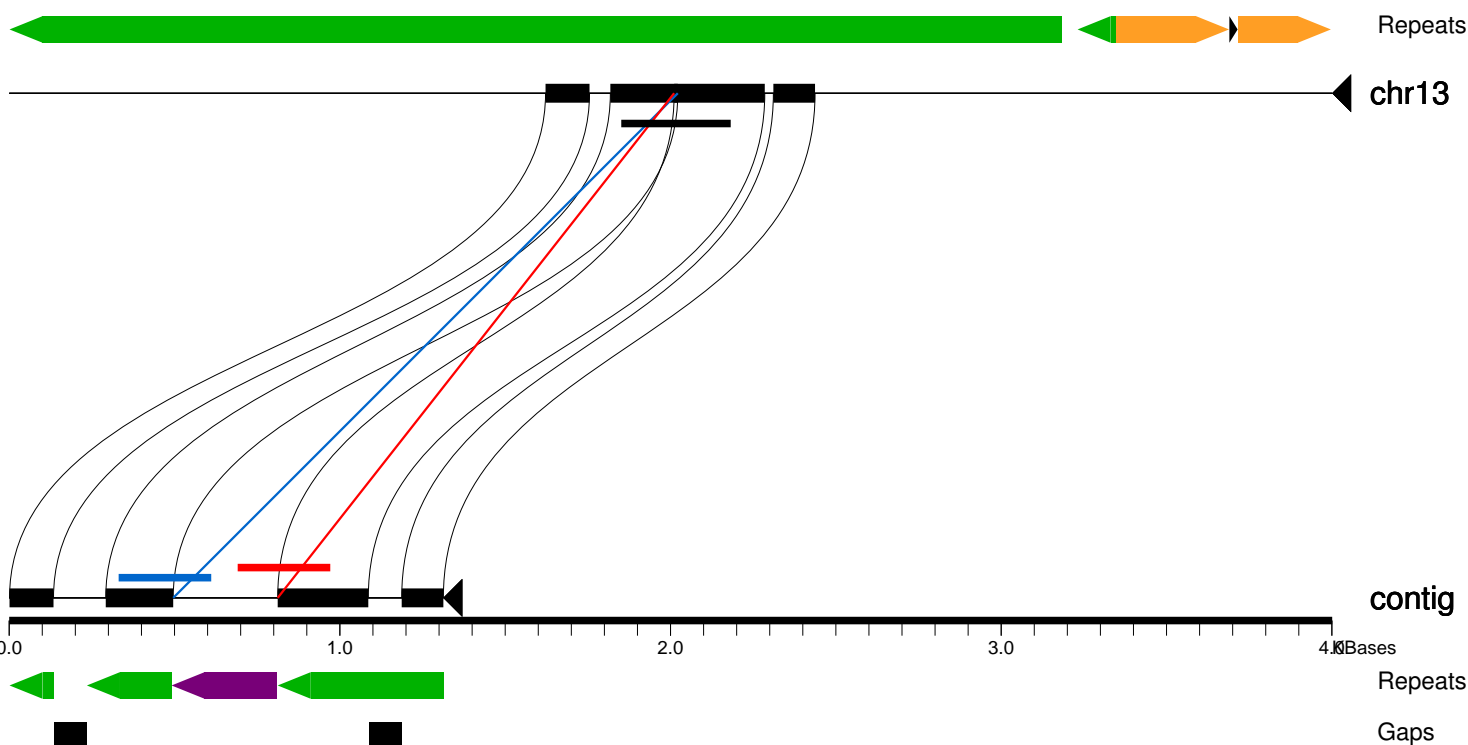











siteID: chr13\_78584671 Scafftig1 - Breakpoint: chr13:78584664

chr13:78584612-78584723

Overlap Length: 8 INS size: 444 Genotyped: No

```
left   TAGTGACTTATATGATTACCATTATTCC----TTAAGGAACTTACACTCAGTG---GAGCAAATCTTTT
chrom  TAGTGACTTATATGATTACCATTATTCC----TTAAGGAACTTACACTCAGTG---GAGCAAATCTT---
right  TCCGCCCGCCTCGGCCTCCCAAAGTGCTGGGATTACAGGCGTGAGCCACCGCGCCCGGCCAAATCTT---
      *11111*111*11*11*1***111*1*11111***11*111*1*11*1*1*1*1*111*11*****222
```

```
left   NNNNNNNNNNNNNNNNNNNNNNNNNNNNNNNNNNNNNNNNNNNNNNNNNNNNNNNNNNNNNNNNNNN
chrom  ----AAAAGCTAATTCAGAGGTCGGATAAATTACATATGCAAAAATTATAAAAAAGA
right  ----AAAAGCTAATTCAGAGGTCGGATAAATTACATATGCAAAAATTATAAAAAAGA
      22222222222222222222222222222222222222222222222222222222222222222222
```

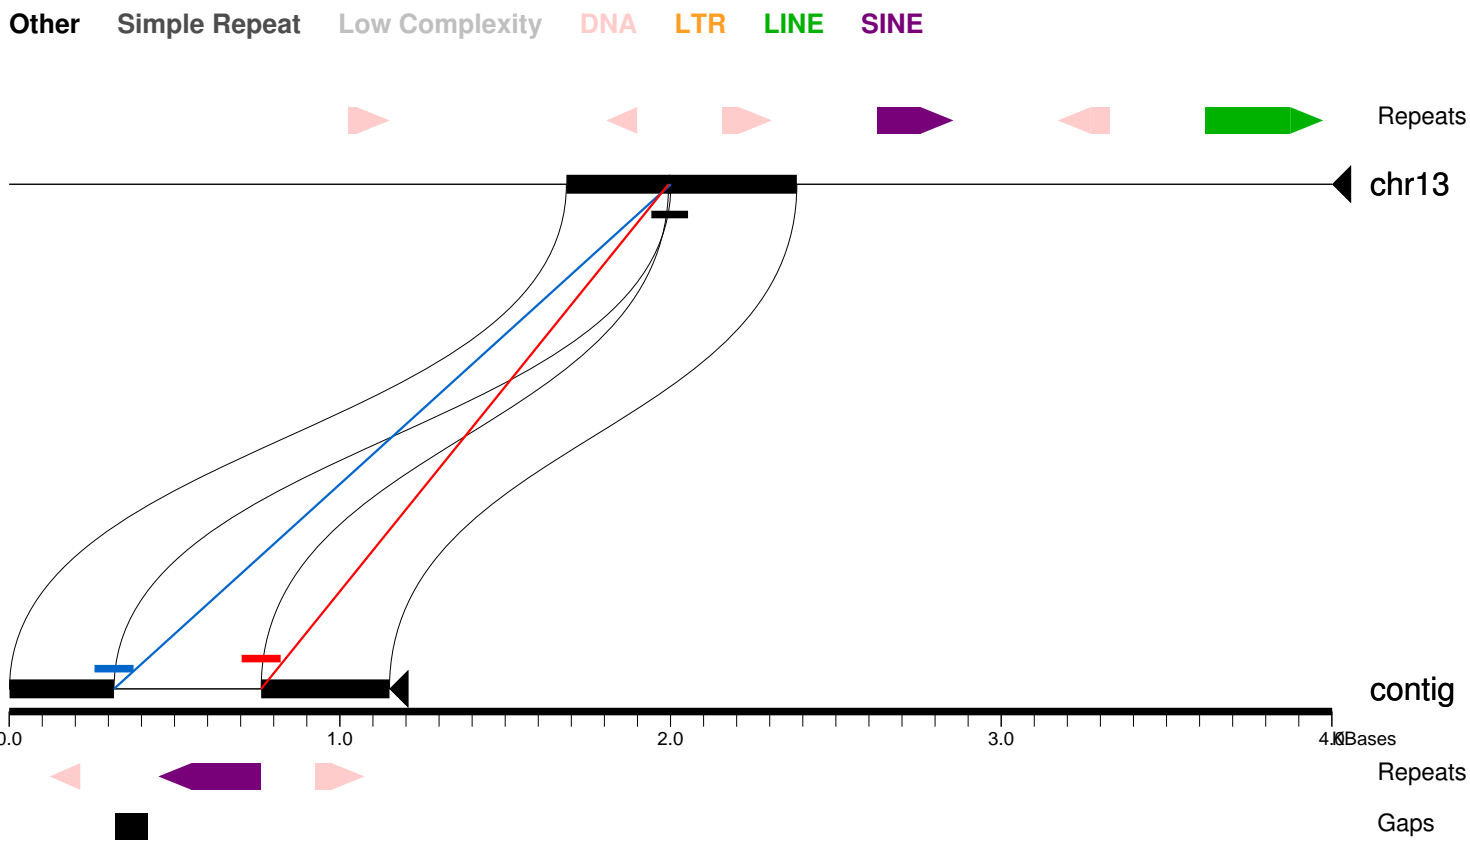

siteID: chr13\_78651700 Scafftig10 - Breakpoint: chr13:78651672

chr13:78651628-78651731

Overlap Length: 16 INS size: 299 Genotyped: Yes

```
left    ---TGCAGTCTTGGCTTTAAAAAATAGAGA-----AACTTTAATTGCCATAAAAAATGGGAA
chrom   ---TGCAGTCTTGGCTTTAAAAAATAGAGA-----AACTTTAATTGCTATAAAAAATGGGAA
right   CACTGCACTCCAGCCTGGGCGACAGAGCGAGACTCCGTCTCAAAAAAAAAAAAAAAAAAAAAAATAAAAAATGGGAA
        111****1**11*1**11111*1*1*11****111111111111**1111**1111N*1*****
left    TTGTTGGCCGGGCGCGGTGGCTCACGCCTGTAATCCCAGCACTTTGGGAGGCCGAGGCGGGCGG
chrom   TTGTTAAACAAGT-----TTTGACATAT-TAATGCT-GCAGAATGCACTGCAG-----CAC
right   TTGTTAAACAAGT-----TTTGACATAT-TAATGCT-GCAGAATGCACTGCAG-----CAC
        ****222*22*22222222*2**222*2****2*22***222**2222*2*222222*22
```

Other Simple Repeat Low Complexity DNA LTR LINE SINE

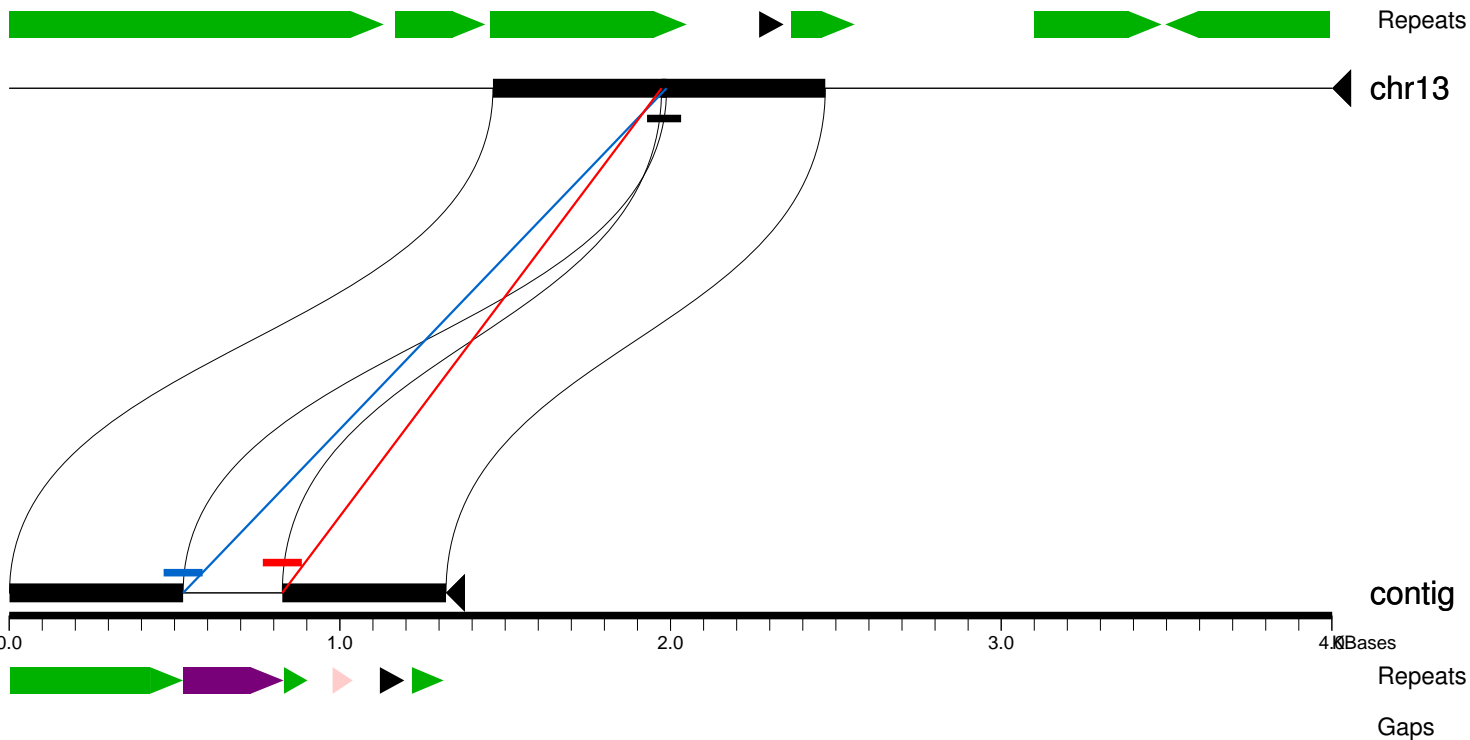

siteID: chr13\_79271591 Scafftig5 - Breakpoint: chr13:79271588

chr13:79271542-79271647

Overlap Length: 14 INS size: 304 Genotyped: Yes

```

left  AGACACATTTAATAACTGGAGGAAGTTTTGGATTGTCTGTCTTGAG-----AAATGG
chrom AGACACATTTAATAACTGGAGGAAGTTTTGGATTGTCTGTCTTGAG-----AAATGG
right -----CACTCCAGCCTGGGCGACAGAGCGAGACTCCGTCTCAAAAAAAAAAAAAAAAAAAAAAAAAATGG
11111**1*11*11111**1*11**11111**1*111*1**111*111111111111111111*****

```

```

left  GCATATTCGGCCGGGCGCGGTGGCTCAAGCCTGTAATCCCAGCACTTTGGGAGGCCGAGGCGGGCGG
chrom GCATATTCACATAT-GTGATGAC---AG---GTGCACATGGATCTTTCGGTG-----TCGTGTCC
right GCATATTCACATAT-GTGATGAC---AG---GTGCACATGGATCTTTCGGTG-----TCGTGTCC
*****22*22222*2*2**2*222**222**222*222*22**2**2*222222*2*222

```

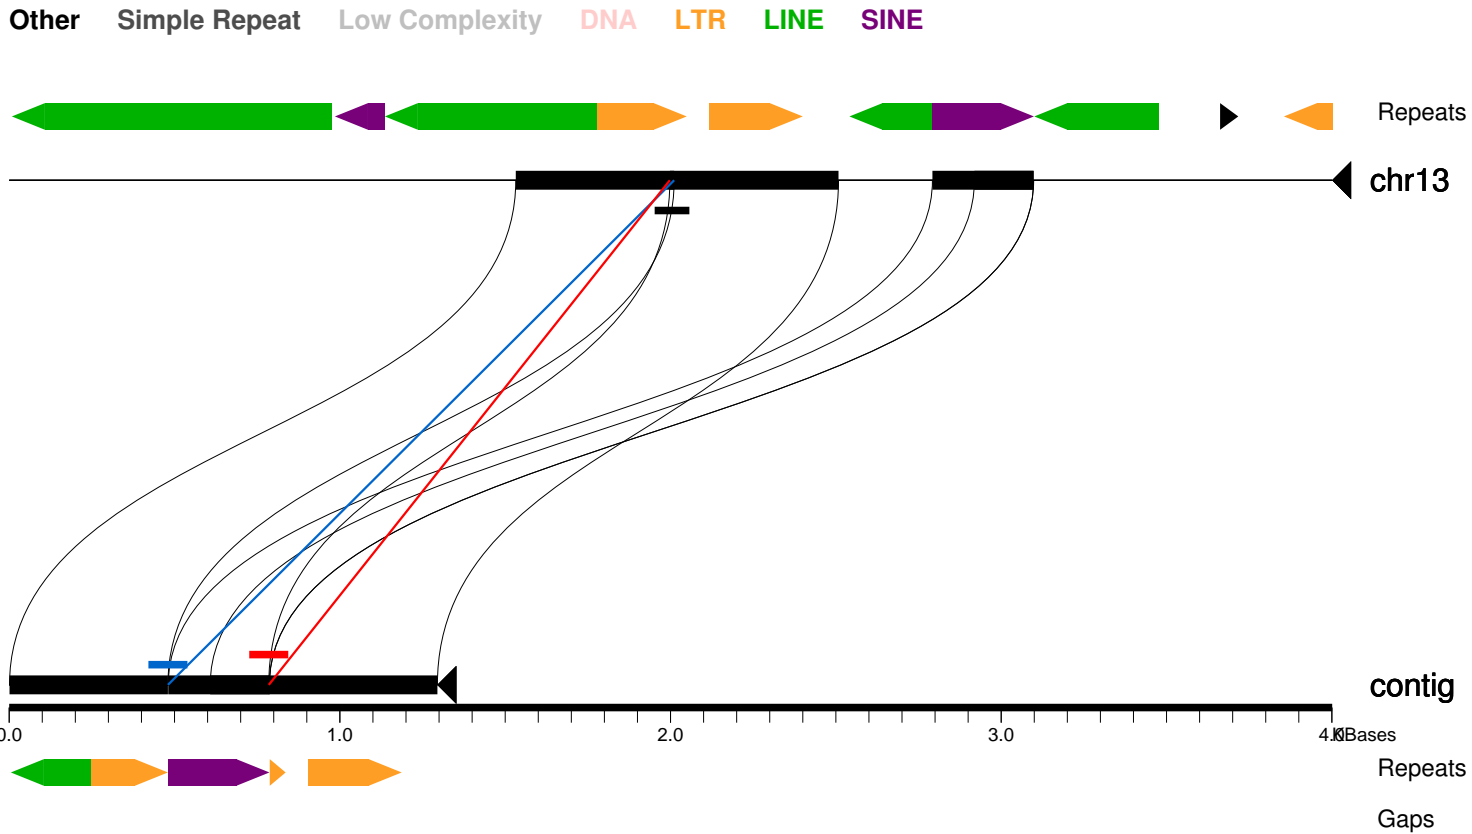

siteID: chr13\_79774254 Scaffitg1 + Breakpoint: chr13:79774274  
 chr13:79774229-79774333  
 Overlap Length: 15 INS size: 380 Genotyped: No

```

left   CTCAAGTAGAACCTTATCAAGAGTACTCCGAGTAAAGCAAAGG-----ACAAAAAGTCTTC
chrom  CTCAAGTAGAACCTTATCAAGAGTACTCCGAGTAAAGCAAAGG-----ACAAAAAGTCTTC
right  NNNNNNNNNNNNNNNNNNNNNNNNNNNNNNNNNNNNNNNNNNNNNNNNNNNNNNNNNNNNNNNNNN
111111111111111111111111111111111111111111111111111111111111111111
***1*****

left   AATAATTGGGAGGCCGAGGCGGGCGGATCACGAGGTCAGGAGATCGAGACCATCCCGGCTAAAA
chrom  AATAACAGTATTGCTATCATTGGTGGT-----GGT--GGTGGTGGTGTCTTTTCACT-----
right  AATAACAGTATTGCTATCATTGGTGGT-----GGT--GGTGGTGGTGTCTTTTCCCT-----
***222*2*222*2*22222*22*2*22222***22**2*2*2*2*2222**N*22222222
  
```

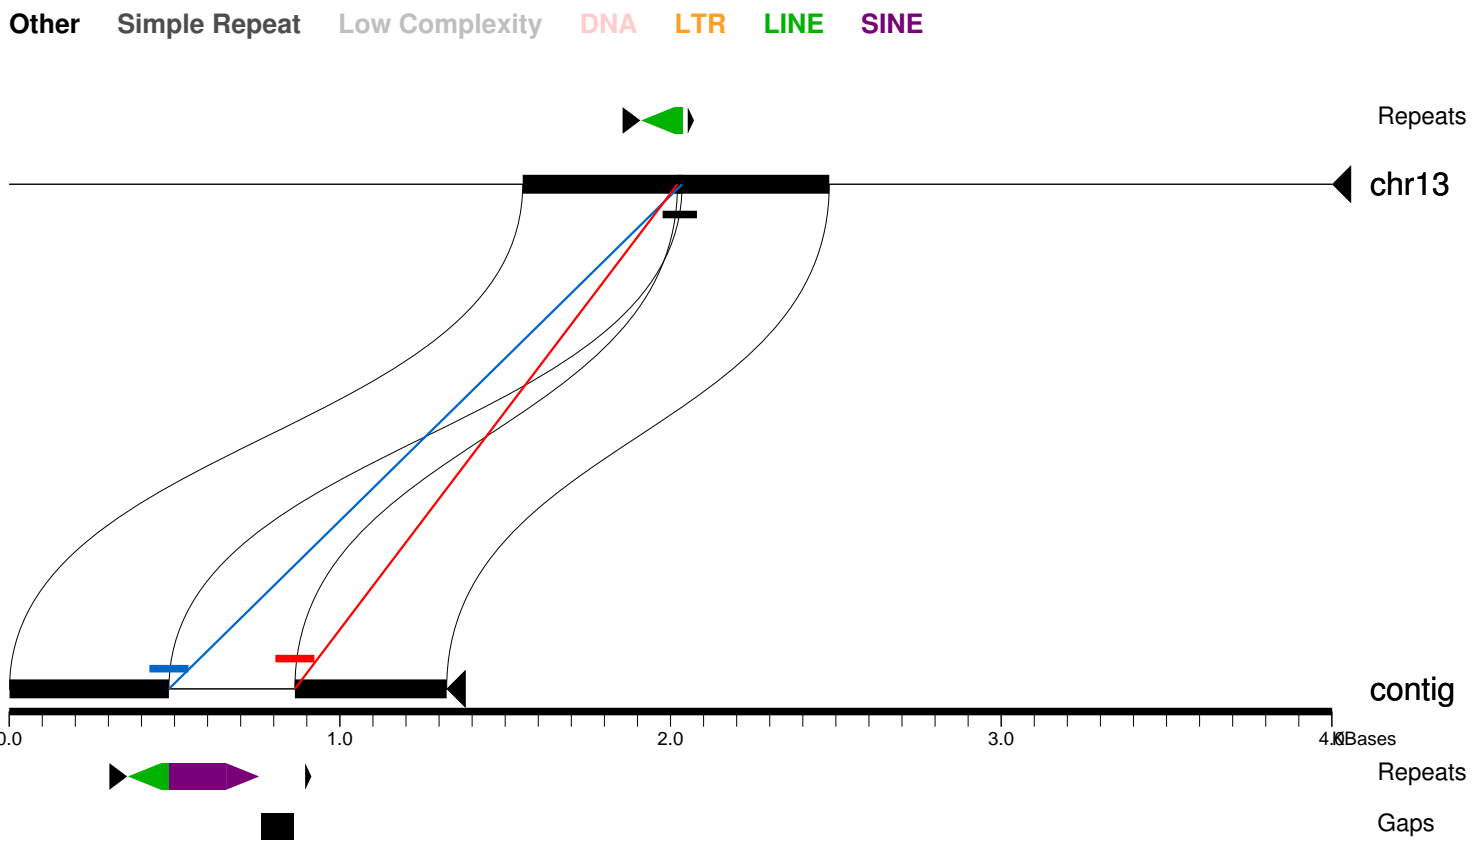



siteID: chr13\_80296998 Scafftig4 + Breakpoint: chr13:80296968

chr13:80296924-80297024

Overlap Length: 13 INS size: 315 Genotyped: Yes

```
left      TAGTAAACCTTC--AGTTCTTCC----TCTTGCTAACATAGTTGGAA-----GGAGGGTTCTT
chrom     TAGTAAACCTTC--AGTTCTTCC----TCTTGCTAACATAGTTGGAA-----GGAGGGTTCTT
right    TGATCCGCCCCGCTCGGCCTCCCAAAGTGCTGGGATTACAGGCGTGAGCCACCGCGCCCCGGCGGGTTCTT
          *11*111*11*111*11*11*1*1111*11*11*11*1*11*11*111111111111*1*****
left      TTATTTTTTTTTTTTTTATTATTTTTTTTTTTTTTTTTGAGACGGAGTCTCGCTCTGTCGCCCAGGC
chrom     TTATTTATTGAAATAACCA---AAGTCCTTCACTCCATTG-----CTTGCAA---CTCCAA---
right    TTATTTATTGAAATAACCA---AAGTCCTTCACTCCATTG-----CTTGCAA---CTCCAA---
          ****2**2222*2222*222*22*22**222*222***222222222**2**22222*2**2*222
```

Other Simple Repeat Low Complexity DNA LTR LINE SINE

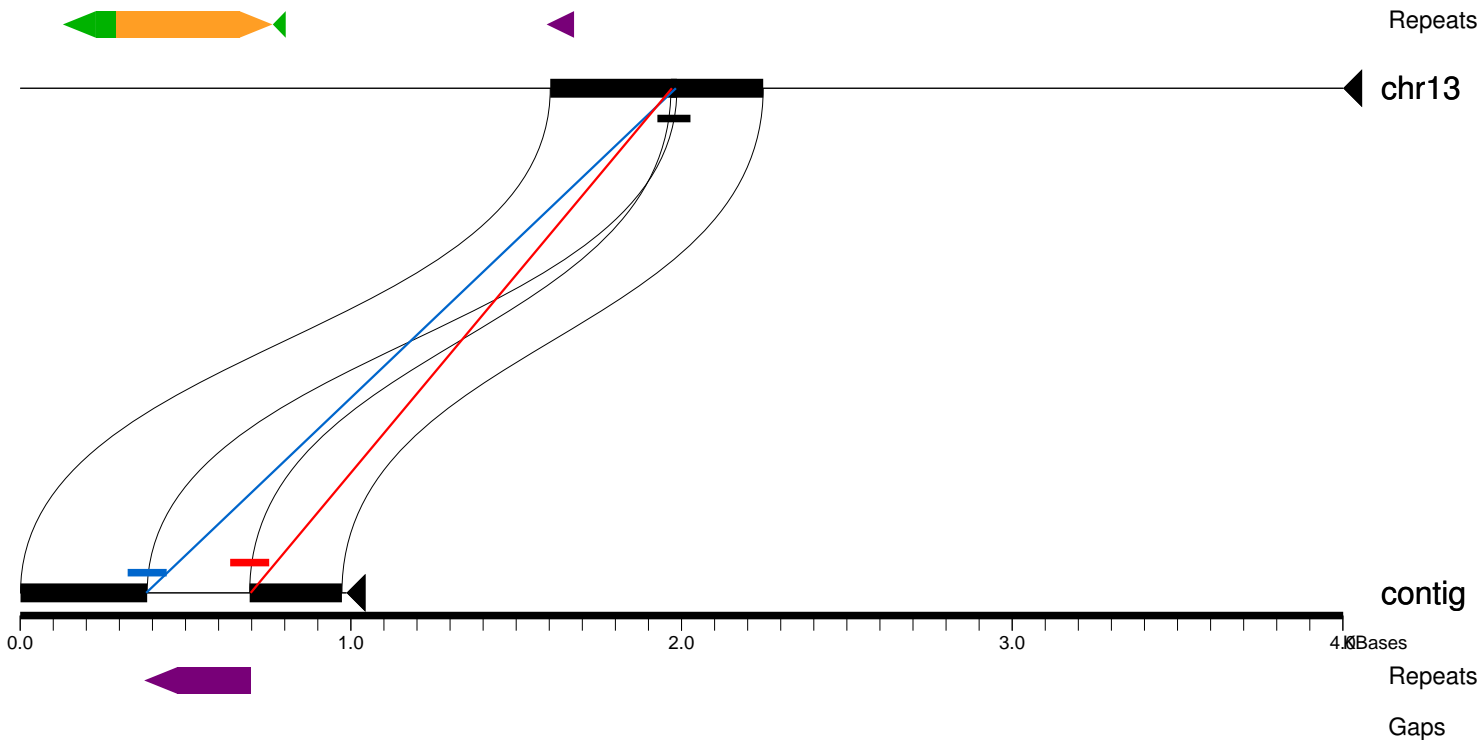

siteID: chr13\_81373646 Scaffitig1 - Breakpoint: chr13:81373725

chr13:81373681-81373784

Overlap Length: 16 INS size: 417 Genotyped: No

```
left  TGT TAAAAAAGCGAAGGCAATCAATTGGA-----TGACATTAAAAATATAGAATGAACTG
chrom TGT TAAAAAAGCGAAGGCAATCAATTGGA-----TGACATTAAAAATATAGAATGAACTG
right NNNNNNNNNNNNNNNNNNNNNNNNNNNNNNNNNNNNNNNNNNNNNNNNNNNNNNNNNNNNNNNNNNNNN
      1111111111111111111111111111111111111111111111111111111111111111111111
      *1*****
```

```
left  AGAAAGGCCGGGCGCGGTGGCTCACGCCTGTAATCCCAGCACTTTGGGAGGCCG-AGGCGGGTGG-
chrom AGAAAGGCCGGGCGCGGTGGCTCACGCCTGTAATCCCAGCACTTTGGGAGGCCG-AGGCGGGTGG-
right AGAAAAA-----TAGTTTAA-----AATAC--GTATGTGTAGAGGGTGTATACTTCTGGC
      ****222222222222*2*2*2*2222222****2*22*2*22*222****22*2*22*222****2
```

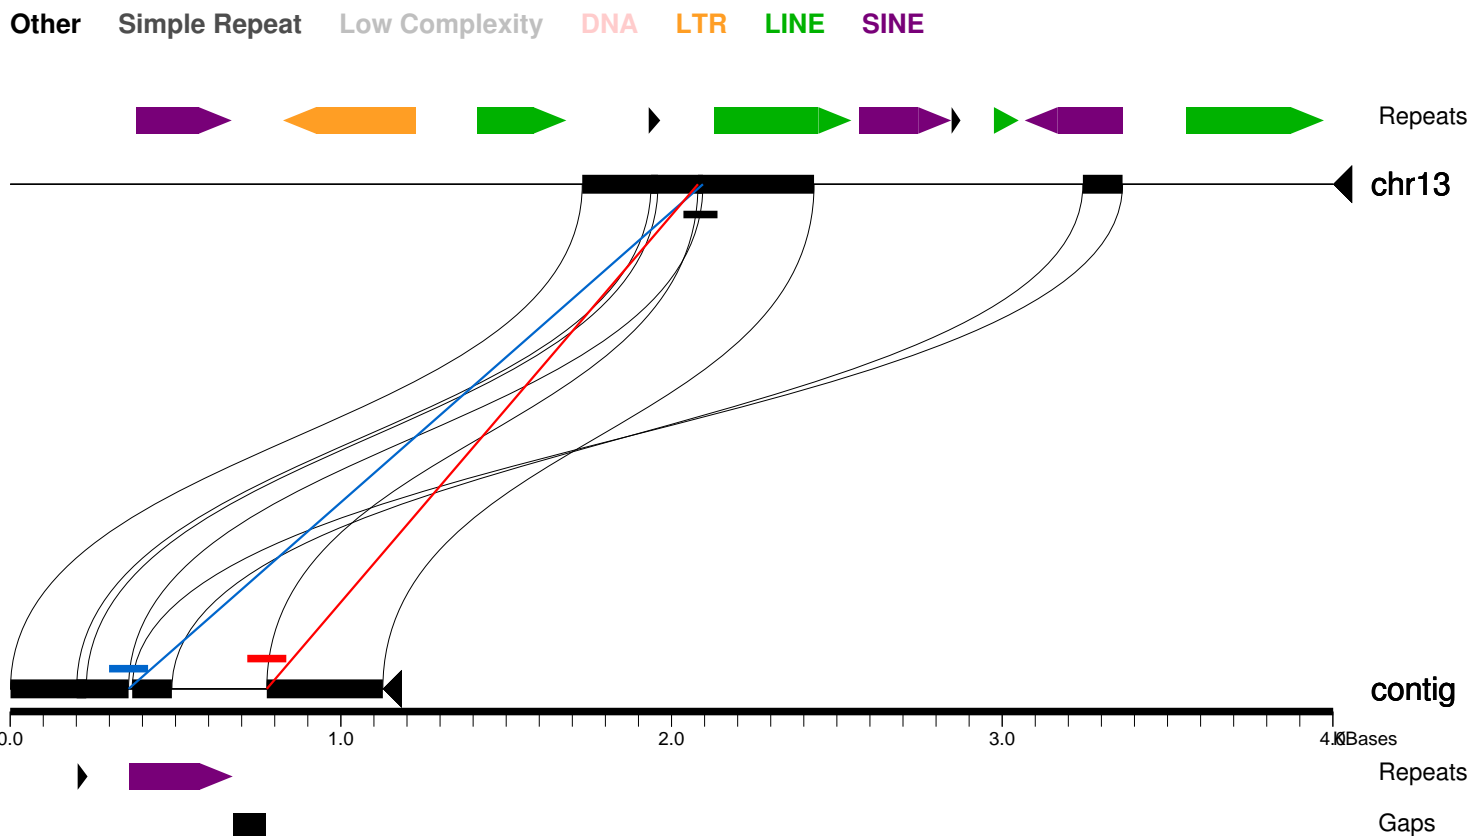

siteID: chr13\_81523087 Scafftig7 + Breakpoint: chr13:81523071

chr13:81523030-81523130

Overlap Length: 19 INS size: 312 Genotyped: Yes

```
left  C-----ACAAATATTGTTGAAGTGTAGTGTTTAAATA--TTGGTAATT-----GTAAAATGATA
chrom C-----ACAAATATTGTTGAAGTGTAGTGTTTAAATA--TTGGTAATT-----GTAAAATGATA
right CCGCCCGCCTCGGCCTCCCAAAGTGTCTGGGATTACAGGCGTGAGCCACCGCGCCCGGCCGTAAAATGATA
      *11111111*11111111*11111*****11*1*1***1*1111*11*11*11111111111111******

left  ACGTTTCATTTCTTTTTTTTTTTTTTTTTTTTTTTTTTTTTTTTGGAGACGGAGTCTCGCTCTGTCGCCCAGG
chrom ACGTTTCATGACAAGTGTGACTTTTGGAAATCTTAATAAAAA-----TTTGAA-----
right ACGTTTCAATGACAAGTGTGACTTTTGGAAATCTTAATAAAAA-----TTTGAA-----
      *****2*222222*2*222*****2222*2**22*22*2*22222222222*2**222222222
```

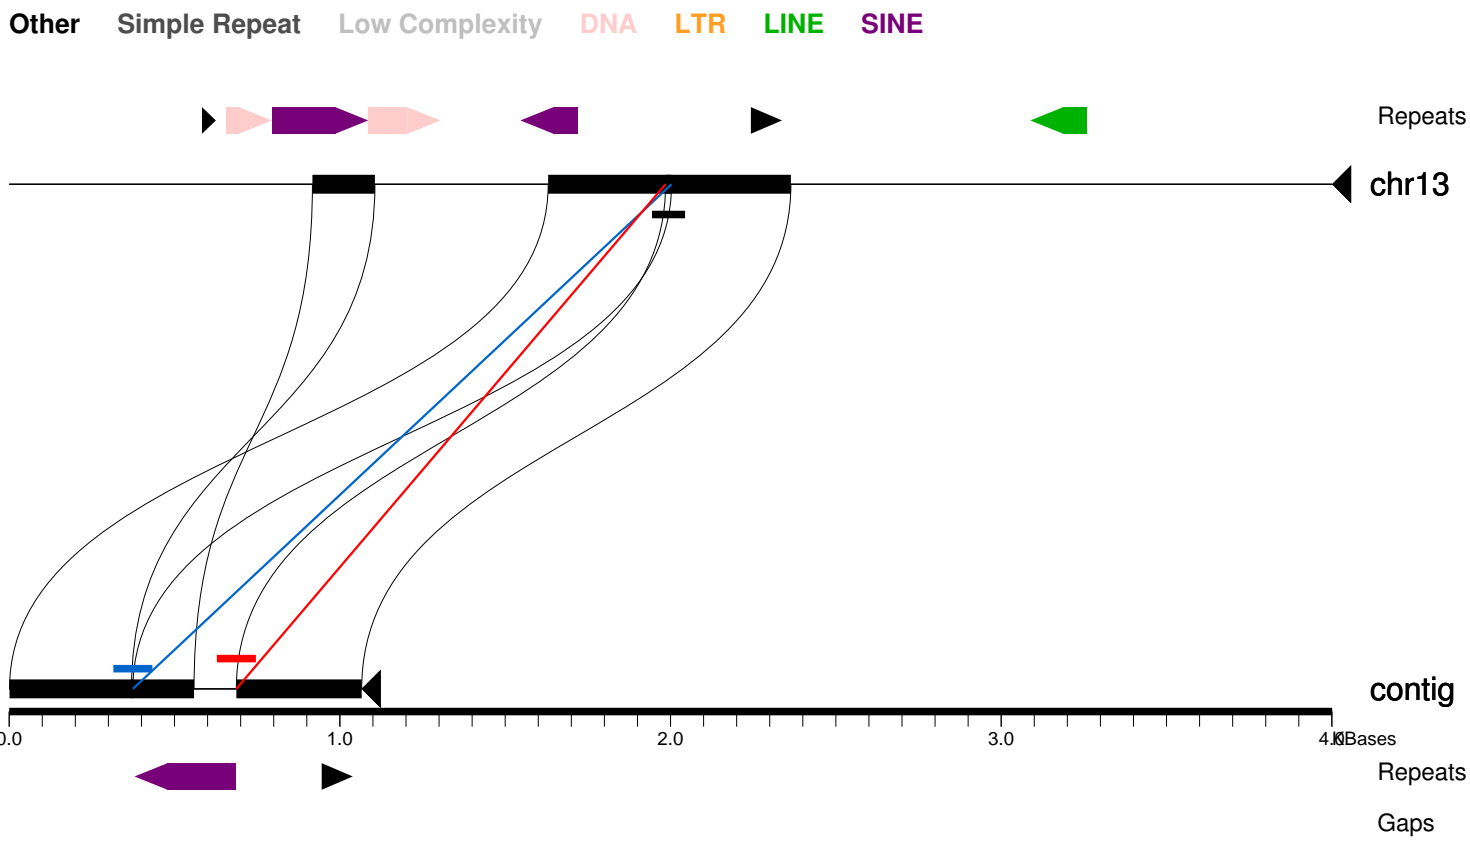



siteID: chr13\_86166454 Scafftig1 - Breakpoint: chr13:86166445

chr13:86166405-86166504

Overlap Length: 2 INS size: 173 Genotyped: Yes

```
left  GCAG--ATTATGGGAAAGTCAGACTG---AGTAG-----AAAACAAACTC-----TTTTTTTTTT
chrom GCAG--ATTATGGGAAAGTCAGACTG---AGTAG-----AAAACAAACTC-----TTGATTCATT
right CACGCCATTCTCCTGCC-TCAGCCTCCCAAGTAGCTGGGACTACAGGCGCCCGCCACTATTTGTTTCATT
      111*11***1*1111111****1**1111*****11111*11***11*1*1111111111*2N**22**

left  TTTTTTTTTTTTTTTTTTTTTTTTTTTTTTTGAGACGGAGTCTCGCTCTGTGCGCCAGGCTGGAGTGCAGTGGC
chrom TAGTTATCTTA-----AGCCAGAGTGGAAAGGTTGCGATTAGATTC--TTAGAATG-C
right TAGTTATCTTA-----AGCCAGAGTGGAAAGGTTGCGATTAGATTC--TTAGAATG-C
      *22**2*2**222222222222222222**2*2***222222*22**222**22*2222*22*2**2*
```

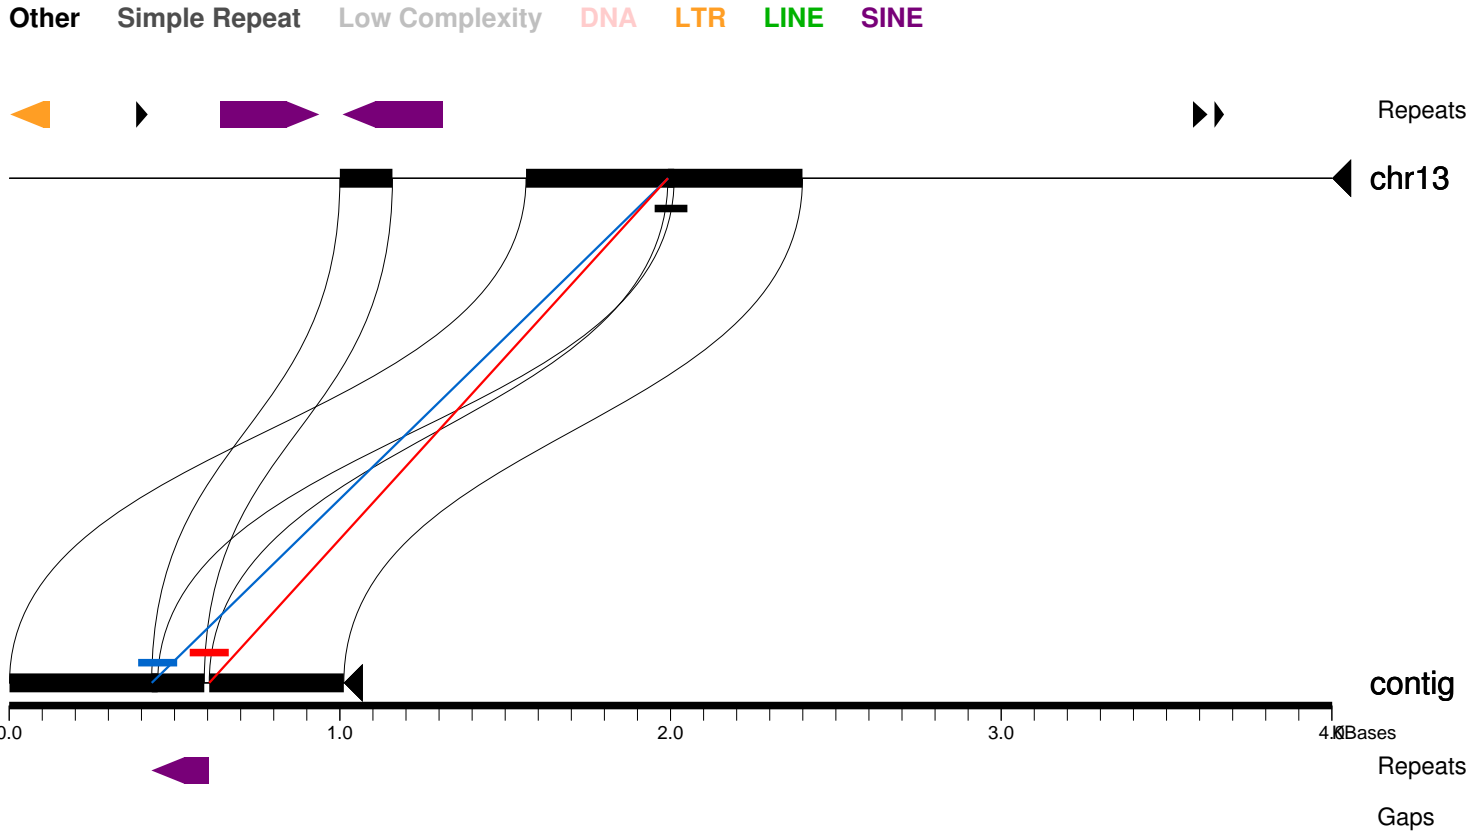

siteID: chr13\_86361633 Scafftig2 - Breakpoint: chr13:86361565

chr13:86361405-86361736

Overlap Length: 12 INS size: 99 Genotyped: Yes

```
left -----ACTCTTAAAATTC AACAAAAAGAAAATGAACATTTGGATAAAAAAGAGGAAAAGACCTA
chrom TTATACAAAGAACTCTTAAAATTC AACAAAAAGAAAATGAACATTTGGATAAAAAAGAGGAAAAGACCTA
right A-ATGTAAA-----TTAAGA--CAACAATGCG-----GAGC--TTGCAGTGAGCCG--GGATAGCGCCA
N 22NN222 1111****1*11*****111*11111**1*11***1*111*111*11*2*1**11*1*
```

```
left AA-CAGATAACCTCAGCAAAGAAGGTATATGTATGGCCATAAATATATGGAAAAGATGATCCACATTACAT
chrom AA-CAGATAACCTCAGCAAAGAAGGTATATGTATGGCCATAAATATATGGAAAAGATGATCCACATTACAT
right CTGCAGTCCAGCTTGGGCGAAAAGAGTGAGACTCCGTCTCAAAAAACA---AAAAACAACAA---ACA-
111***111*1**11*111*1*11**11111*11*1*111***1*1*111***1*11*1*1*1111***1
```

```
left GTCATCAGGGAAATGTAAATTAAGACAACAATGCGG--AGCTTGCAGTGAGCCGGGATAGCGCCACTGCA
chrom GTCATCAGGGAAATGTAAATTAAGACAACAATGAGATAAAATTAGAATGGTCAAAAAGTCAGACAACCTG-A
right ---AACA---AAA-----AAGACAACAATGAGATAAAATTAGAATGGTCAAAAAGTCAGACAACCTG-A
111*1**111***111111111******2*222*22**22*2**22*22222*2222*2****2*
```

```
left GTCCAGCTTGGGCGAAAGAG--TGAG-----ACTCCGTC--TCAA-----AAAACAAAAA--
chrom CAACACCAAGAGCTGATGAGGATGTGGAACAACAATTCCTTCATTCATTGTTGGTGGGAATGCAAAAATGT
right AACACCAAGAGCTGATGAGGATGTGGAACAACAATTCCTTCATTCATTGTTGGTGGGAATGCAAAAATGT
N22**2*22*2**22*2***22**2*2222222*2*2*2**22***22222222222**22*****2222
```

```
left -CAAACA---AACAAAC-----AAAAAGACAACAATGAGATAAAAT
chrom GCAGCCACTTTAGTAGACGGTTAGTTGCTTAGAAAAGCAAAACACAGACTTATTA-
right ACAGCCACTTTAGTAGACGGTTAGTTGCTTAGAAAAGCAAAAC-----
N**22**2222*22*2**22222222222*2***22*2***1NN11NN11NN12
```

Other Simple Repeat Low Complexity DNA LTR LINE SINE

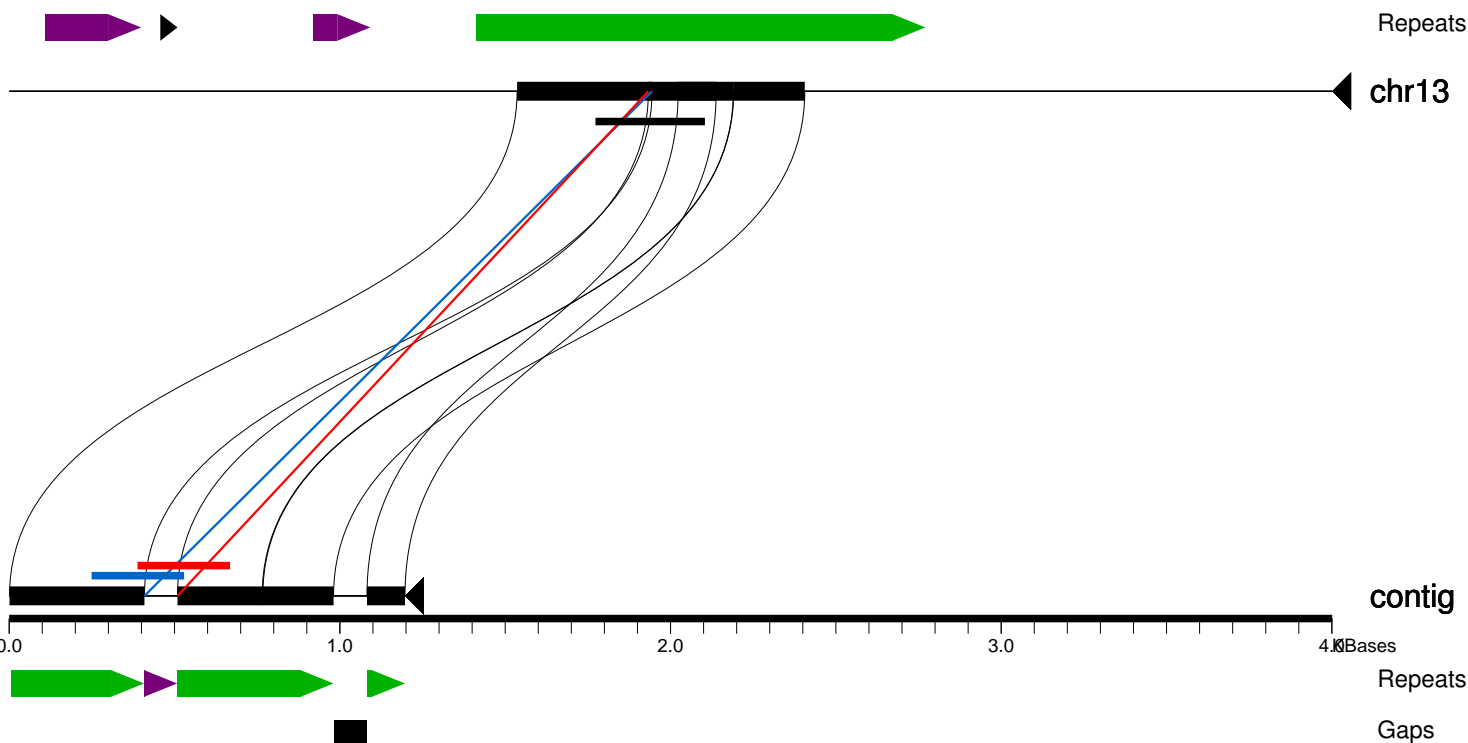

siteID: chr13\_87392969 Scafftig2 + Breakpoint: chr13:87392948

chr13:87392910-87393004

Overlap Length: 16 INS size: 279 Genotyped: Yes

```

left  T-----AAGCAATTGCTATCA-GAATTTTAAAT-----AAAGGTTACTTTTAACT
chrom T-----AAGCAATTGCTATCA-GAATTTTAAAT-----AAAGGTTACTTTTAACT
right AGCCGGGATGGTCTCGATCTCCTGACCTCGTGATCCGCCCCGCTCGGCCTCCCAAAAG--TGCTGTTAACT
      11111111*1*1111*1*1*1**11**11*1111**11111111111111111111111111111111****11*1*1*1*****
  
```

```

left  GAACATTTCTTTTTTTTTTTTTTTTTTTTTTTTTTTTTTTTTTTTTTGGAGACGGAGTCTCGCTCTGTCTCGCCAGGCTG
chrom GAACATTTCTAATTTTATGTGTATAAAATGTATATTT-----GTGTCTGTATTAGT-----
right GAACATTTCTAATTTTATGTGTATAAAATGTATATTT-----GTGTCTGTATTAGT-----
      *****22*****22*2*2*222*2*2*2***2222222222*2*****222*22**2222222222
  
```

```

left  GAGTG
chrom ---TT
right ---TT
      222*2
  
```

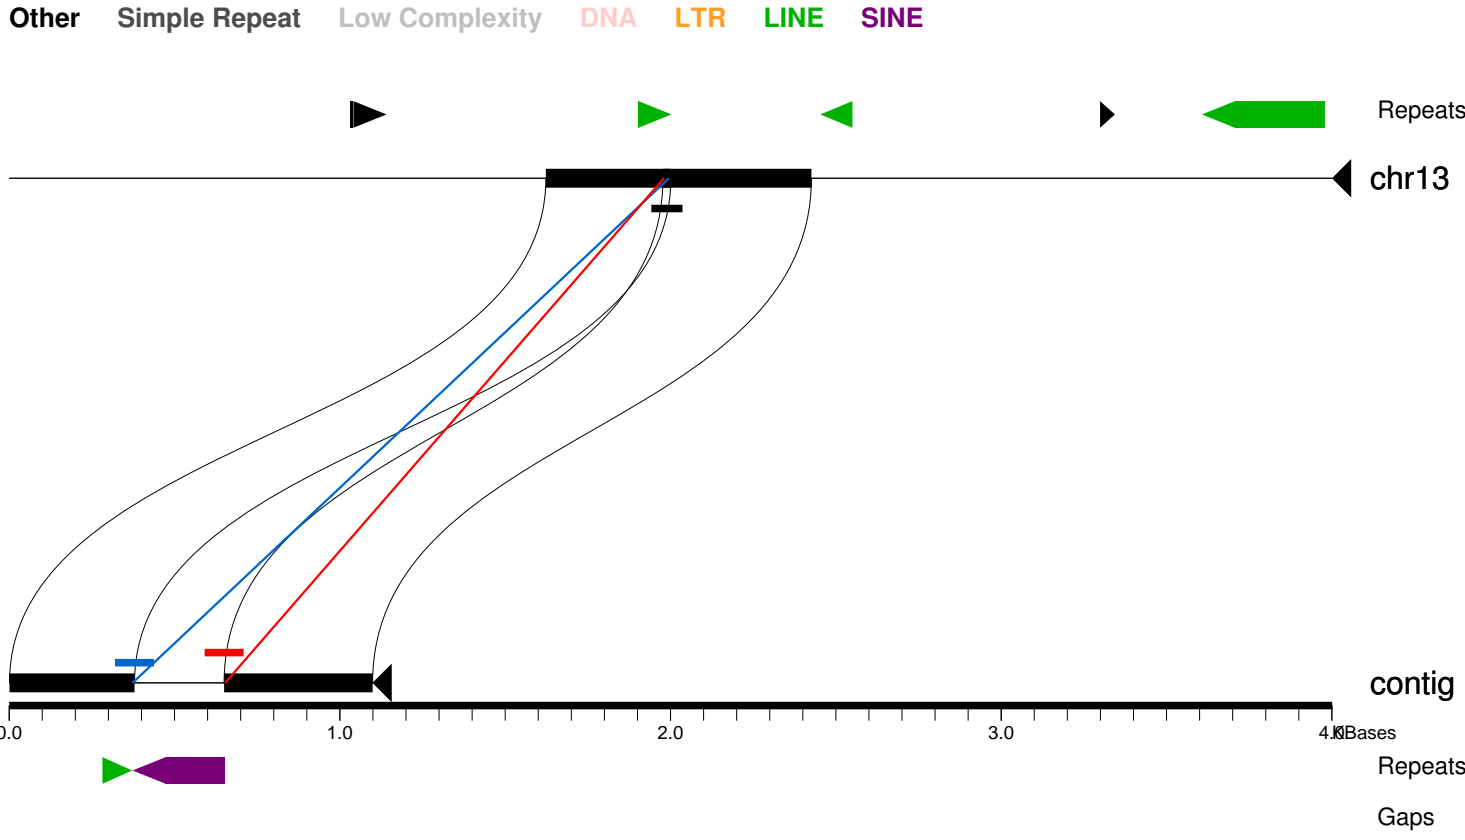

siteID: chr13\_87696248 Scafftig1 - Breakpoint: chr13:87696240

chr13:87696198-87696299

Overlap Length: 18 INS size: 243 Genotyped: Yes

```

left   --ACAT-GA-ACTTAG-CTCTGGACCAAGCAGACCTAATAGACATCT-----AAAGAACTCTC
chrom  --ACAT-GA-ACTTAG-CTCTGGACCAAGCAGACCTAATAGACATCT-----AAAGAACTCTC
right  CGACAGCGAGACTCCGTCTCAAAAAAAAAAAAAAAAAAAAAAAAAAAAAAAAAAAAAAACAAGAACTCTC
      11***11**1***11*1***111*11**11*1*111**1*1*1*11111111111111111******
  
```

```

left   CACCCCAATCGAGACCATCCTGGCTAACACGGTGAAACCCCGTCTCTACTAAAAATACAAAAAATTA
chrom  CACCCCAA-----ATC-----AACAGAAATATACCTTCTTCTC----AACACCACATCGCATTT
right  CACCCCAA-----ATC-----AACAGAAATATACCTTCTTCTC----AACACCACATCGCATTT
      *****22222222***222222***222*22*2*22*2*****2222**2*22***2222***2
  
```

Other Simple Repeat Low Complexity DNA LTR LINE SINE

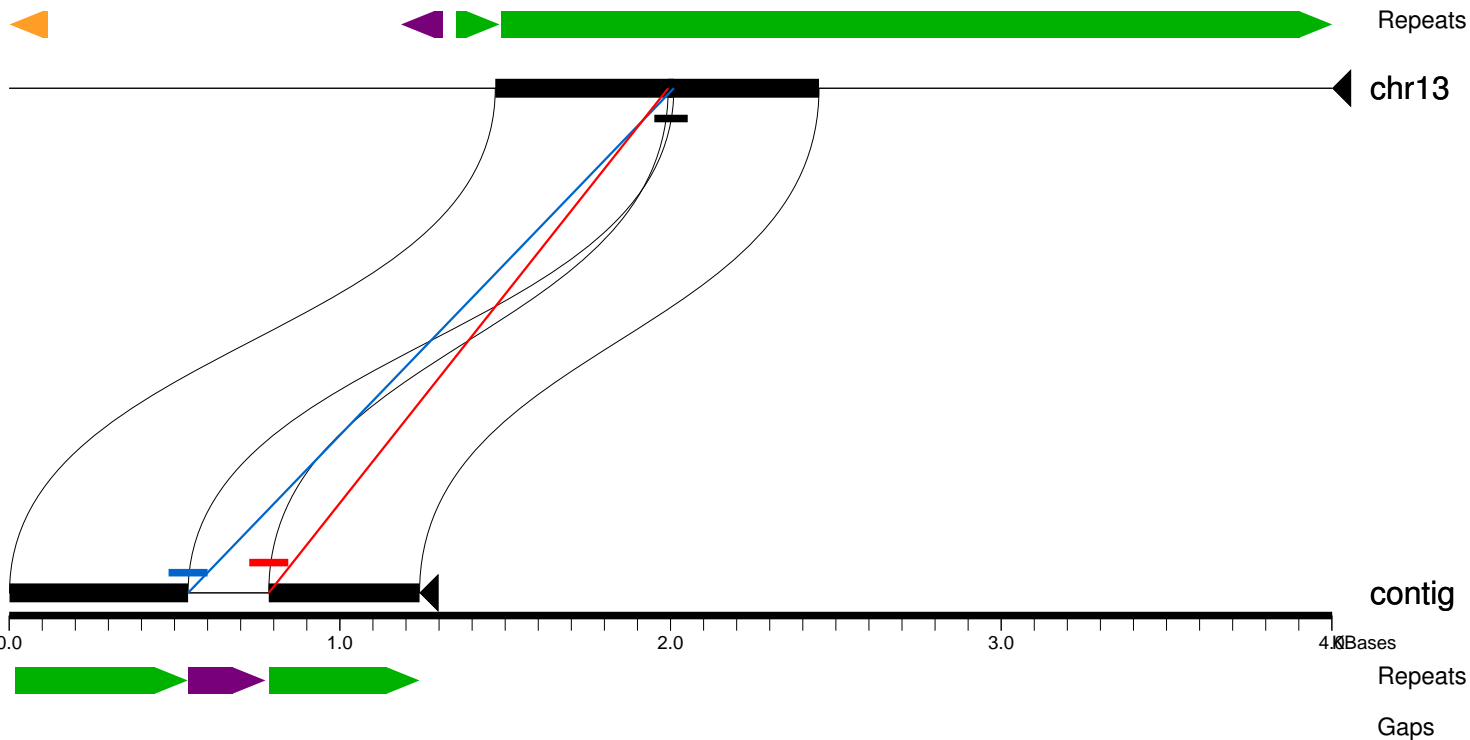

siteID: chr13\_87869619 Scaffitig7 - Breakpoint: chr13:87869616

chr13:87869567-87869672

Overlap Length: 11 INS size: 297 Genotyped: Yes

```
left  CATC--TACTG-----ACATTG---AGAGTGCAGGAAGGC-TGTGAATCTTGAGGACAATAAAGAAAAG
chrom  CATC--TACTG-----ACATTG---AGAGTGCAGGAAGGC-TGTGAATCTTGAGGACAATAAAGAAAAG
right TTGCGCCACTGCACTCCCACCTGGGCCACAGAGCGAGACTCCGTCTCAAAAAAAAAAAAAAAAAAAGAAAAG
      111*111****11111111**1*1*111*1**1**11**111*1*1*1**11111*11*1**1***1****

left  TTTGGCCGGGCGCGGTGGCTCACGCTTGTAATCCCAGC---ACTTTGGGA--GGCCGAGGCGGGCGG
chrom  TTTAACA-----TTGTAATTGCAGGGAGAGGTAGAGTATGGCTAAAAAATTGAAG
right  TTTAACA-----TTGTAATTGCAGGGAGAGGTAGAGTATGGCTAAAAAATTGAAG
      **22*222222222222222222222222*****22***2222*22*2*2*222***22*22222*22*
```

Other Simple Repeat Low Complexity DNA LTR LINE SINE

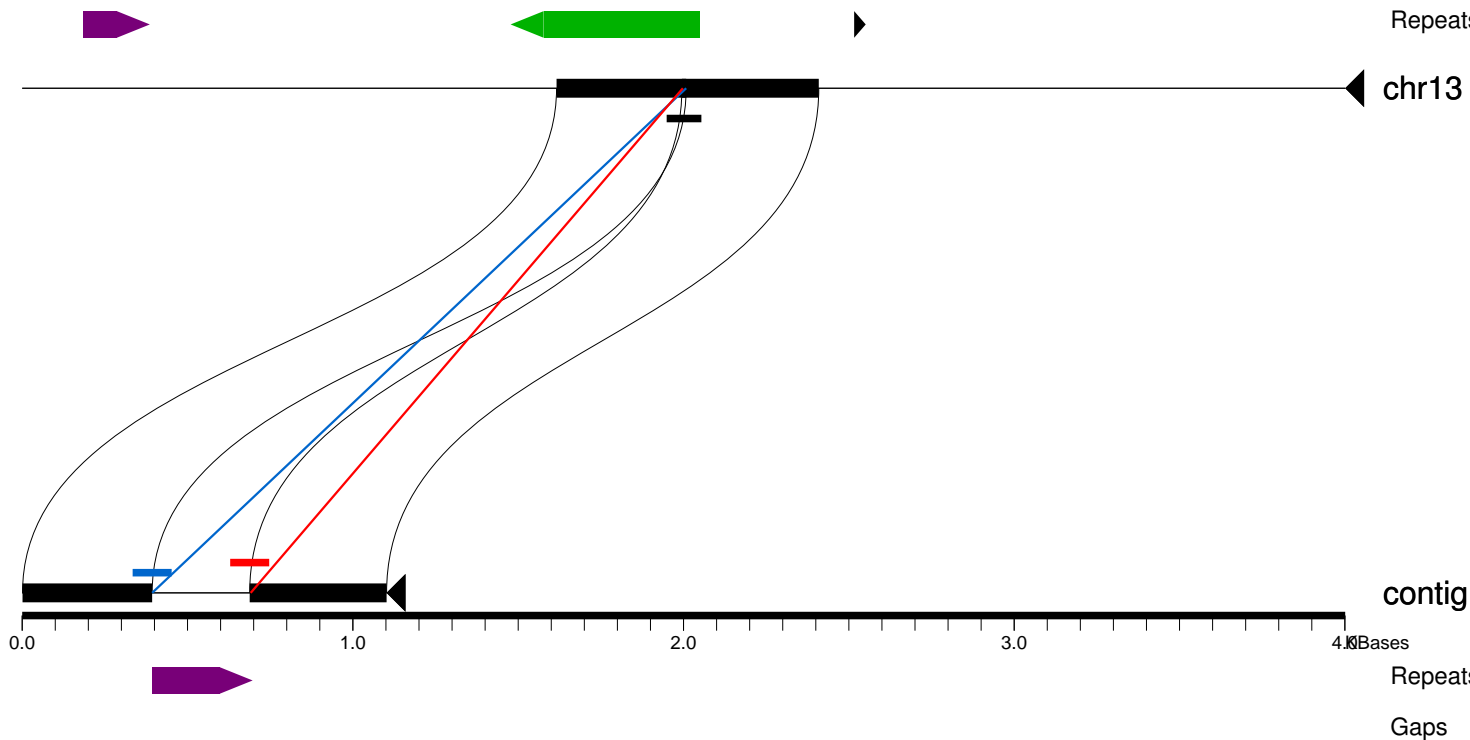

siteID: chr13\_90401823 Scafftig3 - Breakpoint: chr13:90401833

chr13:90401787-90401892

Overlap Length: 14 INS size: 315 Genotyped: Yes

```
left TAGAATTT----ACA-ATCGA-----TGCACACCCAAAAATATTGAAGGCATGTAGAAATGAGTTTT
chrom TAGAATTT----ACA-ATCGA-----TGCACACCCAAAAATATTGAAGGCATGTAGAAATGAGTTTT
right CCGGCCTGGGCGACAGAGCGAGACTCCGTCTCAAAAAAAAAAAAAAAAAAAAAAAAAAAAAAAAAAAATGAGTTTT
      11*111*11111***1*1***1111111111**1*111*****1*111**111*111*1*****
```

```
left ATAGGCCGGGCGCGGTGGCTCACGCCTGTAATCCAGCACTTTGGGAGGCCGAGGCGGGTGG
chrom ATAAACAATGAATAGTT----ATTTCTGGAG----AGAAATATAAAATGTATTAATT----
right ATAAACAATGAATAGTT----ATTTCTGGAG----AGAAATATAAAATGTATTAATT----
      **22*222*2222**22222*222**2*22222**2*2*2*222*2*22222222222222
```

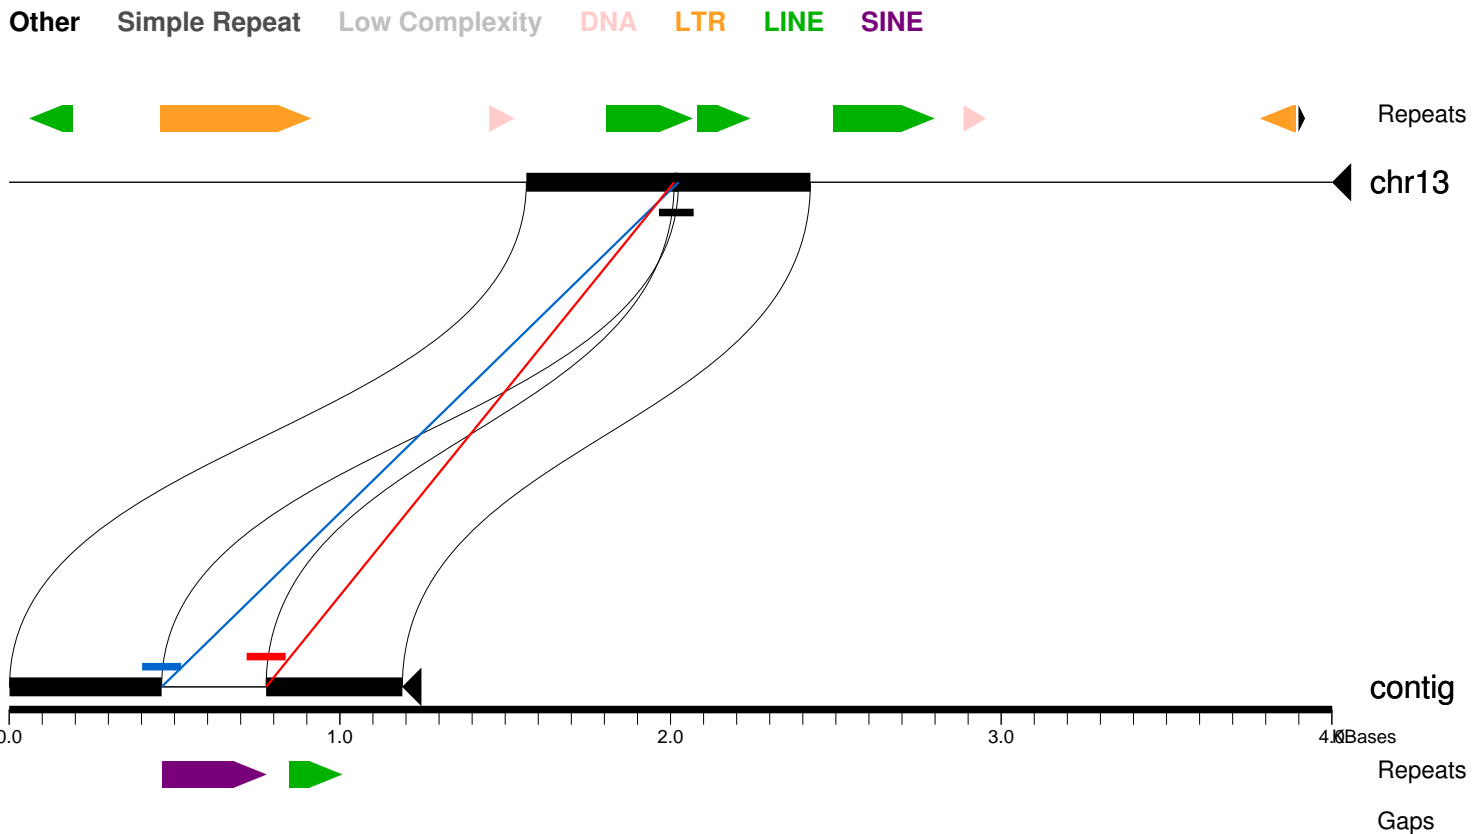



siteID: chr13\_90550562 Scafftig5 - Breakpoint: chr13:90550561

chr13:90550516-90550620

Overlap Length: 15 INS size: 308 Genotyped: Yes

```
left ATACCTAAGG-----GAATGTGTATCAGGAGAGAG---GTGATGGTGGTGGTTAACAGGAGACA
chrom ATACCTAAGG-----GAATGTGTATCAGGAGAGAG---GTGATGGTGGTGGTTAACAGGAGACA
right CCAGCCTGGGCGACAGAGCGAGACTCCGTCTCAAAAAAAAAATAAAATAAAATAAAATAAACAGGAGACA
11*1*111**1111111111111**1*11**1***11*1*1*11111*1*1111111111*1*****

left GATGCGCCGGG--ACGGTGGCTCACGCCGTGAATCCCAGCACTTTGGGAGGCCGAGGCCGGGCGGA
chrom GATG-CTGAGATTAAGCAGTTTTTC-CTTGAAATCC-----ATTATCAG-CAGATAC-----
right GATG-CTGAGATTAAGCAGTTTTTC-CTTGAAATCC-----ATTATCAG-CAGATAC-----
***2*2*2*222*22*22*2*22*2*2**2*****2222222**222**2*2**22*2222222
```

Other    Simple Repeat    Low Complexity    DNA    LTR    LINE    SINE

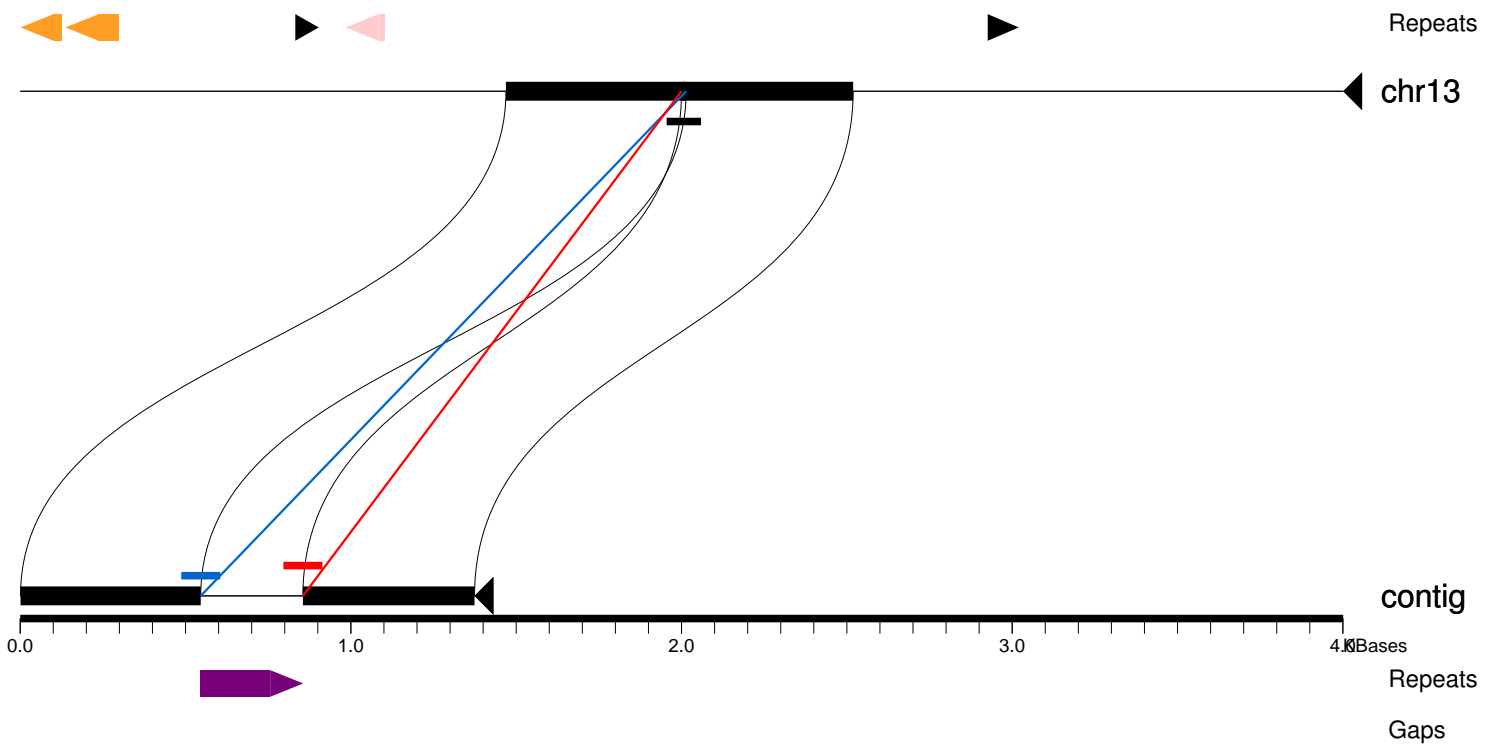





siteID: chr13\_92161687 Scafftig9 + Breakpoint: chr13:92161659

chr13:92161615-92161718

Overlap Length: 16 INS size: 309 Genotyped: Yes

```
left  AGTTACTTCAATTAGGTCTTTAAAAGTGCTCATAAAGAAGGCTT-----AACATATT
chrom AGTTACTTCAATTAGGTCTTTAAAAGTGCTCATAAAGAAGGCTT-----AACATATT
right CCACCCGCC---TCGGCCTCCCAAAGTGCTGGGATTACAGGCGTGAGCCACCCGCGCCCGGCCAACATATT
      11111*11*111*1**1**111*****111*1111****1*11111111111111111111*****
```

```
left  CATATTTTTTTTTTTTTTTTTTTTTTTTTTTGGAGACGGAGTCTCGCTCTGTCGCCCAGGTGGGACTGCGGA
chrom CATATTTTAAAGGATCAAATAGT-----GAGA--TAGTCA---TATTTG---CA--TAGGCATTCTTA
right CATATTTTAAAGGATCAAATAGT-----GAGA--TAGTCA---TATTTG---CA--TAGGCATTCTTA
      *****22222*2222*22*22222****222****2222*2*2*2222**22*2**22*2*22*
```

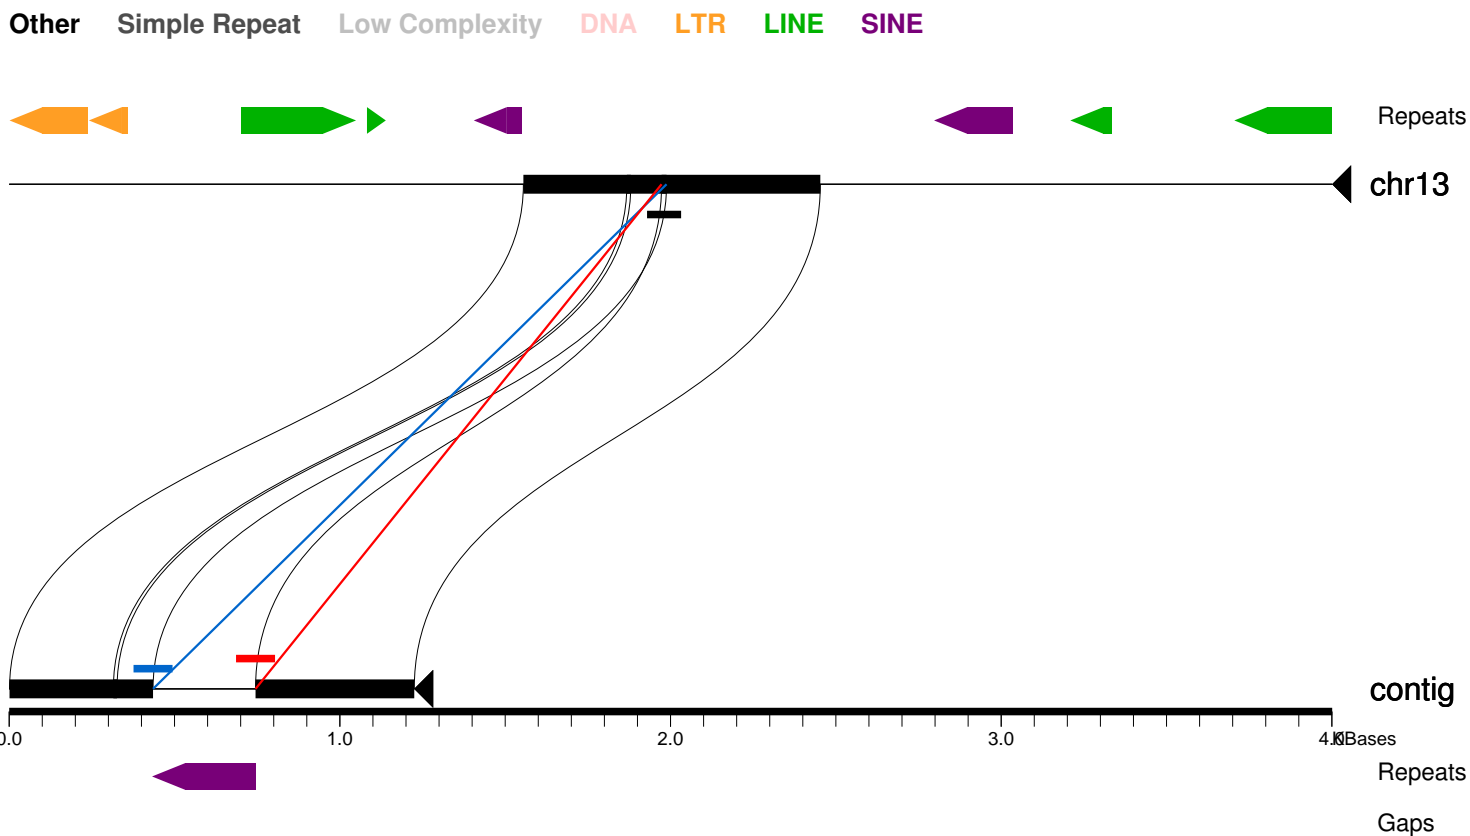



siteID: chr13\_92513972 Scafftig7 - Breakpoint: chr13:92513963

chr13:92513921-92514022

Overlap Length: 18 INS size: 263 Genotyped: Yes

```
left  -ATCTCTACCTTACAAT-----TGGATAATTTAG-----TTCAT----AAATATGTTAAATAAAACAT
chrom -ATCTCTACCTTACAAT-----TGGATAATTTAG-----TTCAT----AAATATGTTAAATAAAACAT
right GATCCCGCCACTGCACCTCCAGCCTGGACGACAGAGCGAGACTCCGTCTCAAAAAAAAAAAAAAAAAAAACAT
      1***1*11*11*1**1*111111****11*111**111111*1*1*1111***1*1111***1*****
```

```
left  GTTGCTATCCCAGCACTTTGGGAGGCCGAGGCGGGCGGATCACGAGGTCAGGAGATCGAGACCATC
chrom GTTGCTA-----CTTTTAAAACTGTA-CAATCTGTT-----TCTTGTT-TCTCTTCTCTT
right GTTGCTA-----CTTTTAAAACTGTA-CAATCTGTT-----TCTTGTT-TCTCTTCTCTT
      *****22222222****222*22*2*222*222*2*2*2222222**22*222**2222*22*2
```

Other Simple Repeat Low Complexity DNA LTR LINE SINE

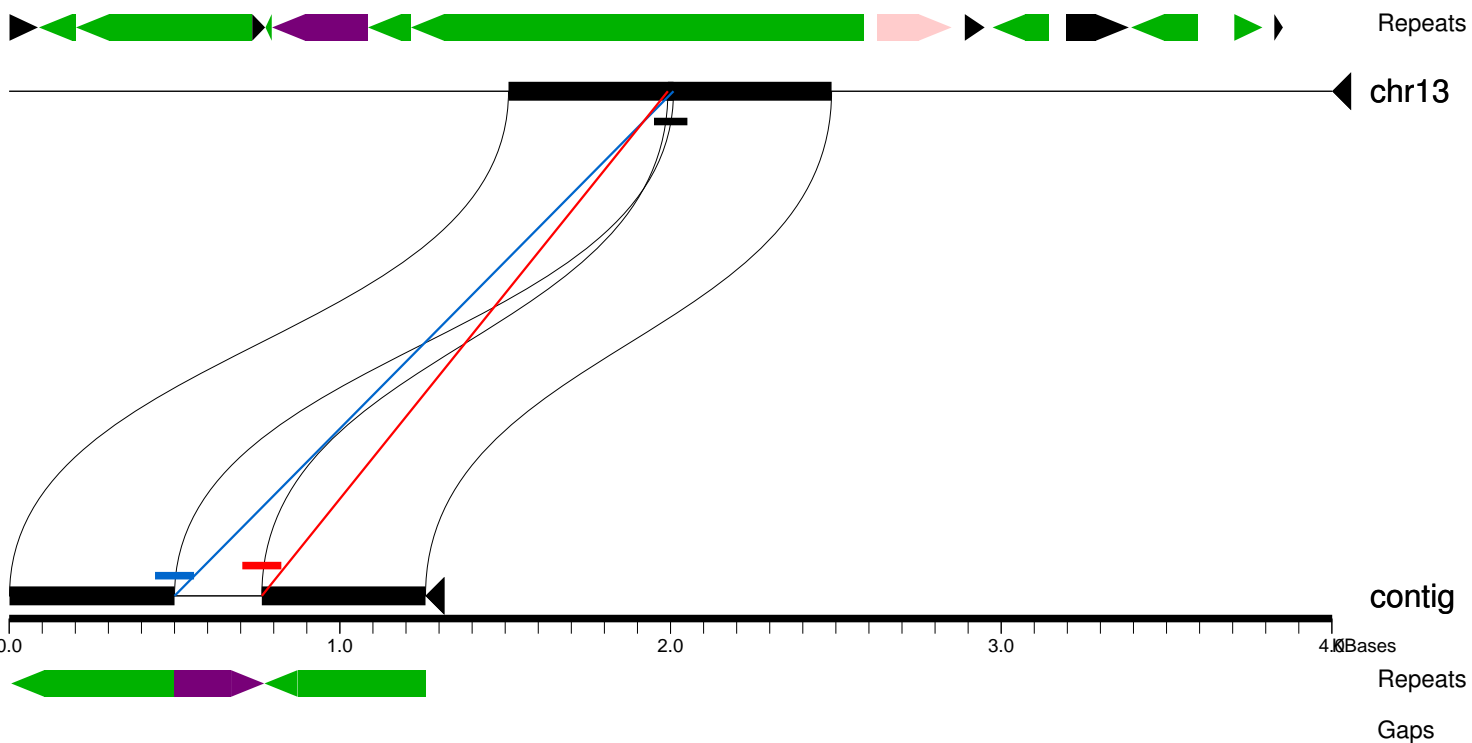



siteID: chr13\_93101143 Scafftig8 - Breakpoint: chr13:93101135

chr13:93101091-93101194

Overlap Length: 16 INS size: 249 Genotyped: Yes

```
left  CTTTGAG-----AGATTCCTGCTTAATGGTATAAGAGAAATTCCTTCATTAAAGAAGCCC
chrom CTTTGAG-----AGATTCCTGCTTAATGGTATAAGAGAAATTCCTTCATTAAAGAAGCCC
right ACTCCAGCCTGGGCGACAGAGCGAGACTCCGTCTCAAAAAAAAAAAAAAAAAAAAAAAAAAA-AAAGAAGCCC
      11*11**11111111111111111111***1***11**1**1111*1**1*1***111111*11*****
```

```
left  ACACAGCGGATCACGAGGTCAGGAGATCGAGACCATCCCGGCTAAAACGGTGAAACCCCGTCTCT
chrom ACACAGTTATAACCCCA---CAA-AAAGCTAATGCTATTGGGC----ACTGTAGAA----GTG---
right ACACAGTTATAACCCCA---CAA-AAAGCTAATGCTATTGGGC----ACTGTAGAA----GTG---
      *****22222*2*2*222**22*2*2*2*222*22222***2222**2**22**2222**2222
```

Other Simple Repeat Low Complexity DNA LTR LINE SINE

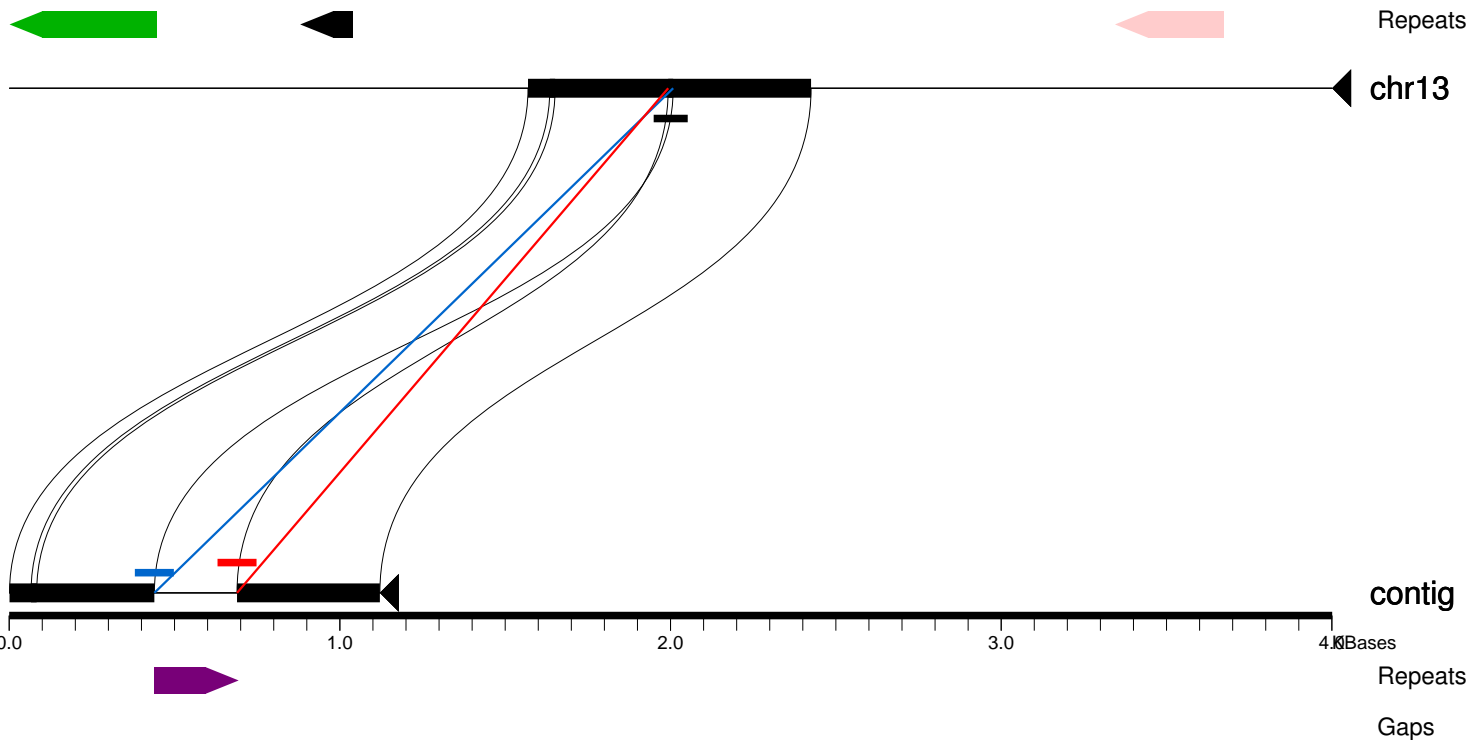

siteID: chr13\_93828423 Scaffitg3 + Breakpoint: chr13:93828407

chr13:93828247-93828581

Overlap Length: 15 INS size: 288 Genotyped: Yes

```
left      A-----TCCAACCACATGTAAAAAACTTAATTCACCATAATCAAGTGGGCTTTATTTCCTTGGATG
chrom     AGCAACCCAAAATCCAACCACATGTAAAAAACTTAATTCACCATAATCAAGTGGGCTTTATTTCCTTGGATG
right     TT-----TTGTATTTTTAGTAGAGACGGGGTTTCACCAT-----TTTTTAGCCGGGATG
          1N                *111*111111***1*1*111111*****111111111111***1*11*11*****
```

```
left      CAAAGTTGGTTCAACACACACAGATCAATAAATGTGATTCATCATA-TAAGCAGAACTAAAAACAAAAAC
chrom     CAAAGTTGGTTCAACACACACAGATCAATAAATGTGATTCATCATA-TAAGCAGAACTAAAAACAAAAAC
right     -----GTCTCGATCTCCTGACCTC-----GTGATCCGCCCGCCTCGGCCTCCCAAAGTGCTGGGAT
          11111111*11**1*11111*11*11**11111111*****1*11*1111*11**1111*1**111*1111*1
```

```
left      CCCATGATCATCTCAATACATGCAGAAAAGGTTTTTTTTTTTT-----TT--TTTGGAGACG--
chrom     CCCATGATCATCTCAATACATGCAGAAAAGGTTTTTTTGATAAAATTCAGCACAGCTTCATGTTAAAAAGCT
right     TACAGG-----CGTGAGCCACGCAGAAAAGGTTTTTTGATAAAATTCAGCACAGCTTCATGTTAAAAAGCT
          11**1*111111*111*11**1*****1*22*2222*2222222222*22*2**2*2*2*22
```

```
left      -GAGTCTCG-CTCTGTGCGCCAGGCTGGAG---TGC-----AGTG-GCGGGATCTCGG-----CTCAC
chrom     AGAGGCTCTACAAAAGTAGGTCTTGAAGAAAACATTTCTCAAAAATAGTAAGAGCCATCTATGACAAGCCCAC
right     AGAGGCTCTACAAAAGTAGGTCTTGAAGAAAACATTTCTCAAAAATAGTAAGAGCCATCTATGACAAGCCCAC
          2***2***22*222*2*22*22*22*2*2222*2*2222222***22*2*22****22*22222*2***
```

```
left      TGCAAGCTCCG--CCTCCCGGGTTCACGC-----CATTCTCCTG-----CCTCAG
chrom     AGCCAACATCATAACAGAAATGGGAAAAAGCTGGAAGCATTTCCCTTGAGAACCAGAA
right     AGCCAACATCATAACAGAAATGGGAAAAAGCTGGAAGCATTTC-----
          2*2*2*22*222*22222***222*2**22222****22111N      11NN1N
```

Other Simple Repeat Low Complexity DNA LTR LINE SINE

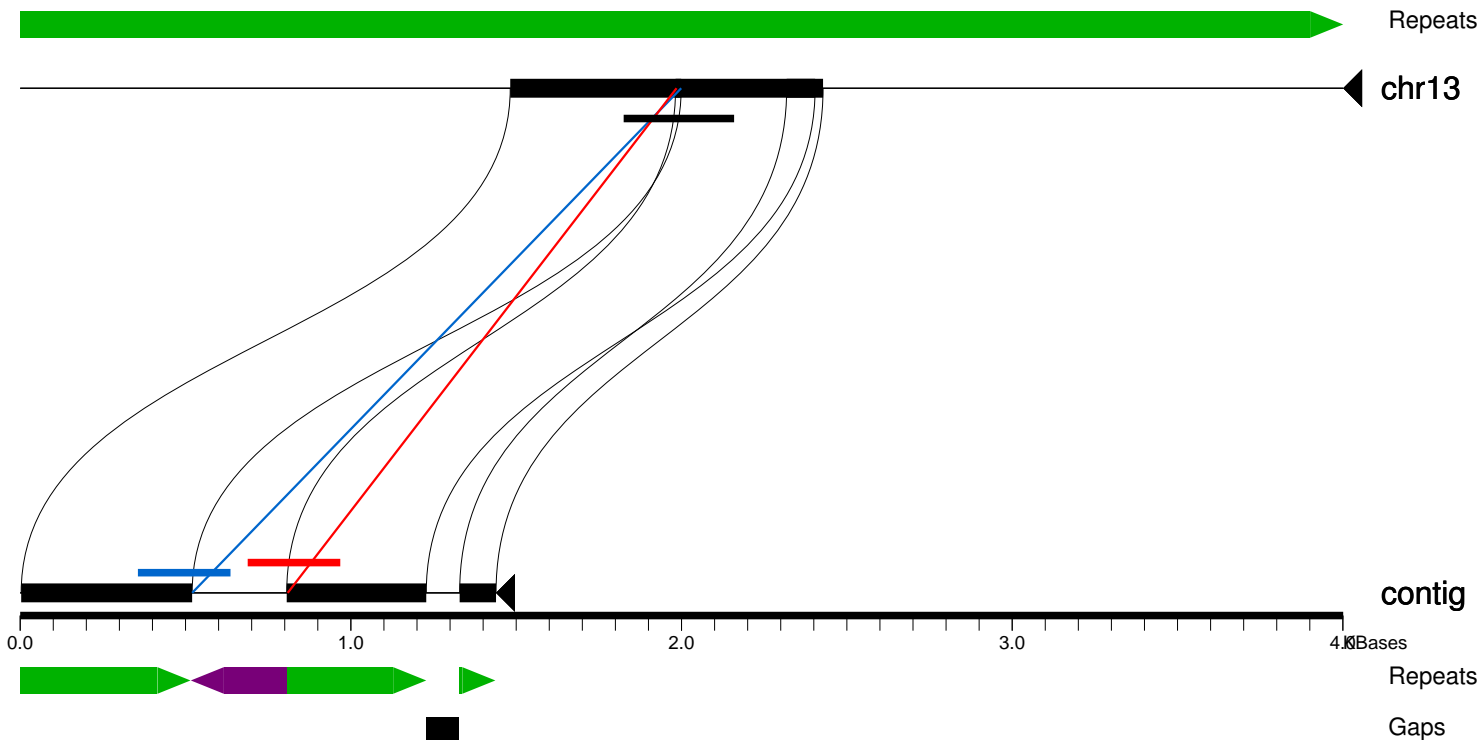

siteID: chr13\_94105819 Scafftig3 - Breakpoint: chr13:94105804

chr13:94105751-94105863

Overlap Length: 7 INS size: 302 Genotyped: Yes

```
left  GGTGGGTTCCTTGGTCTCACTGACTTCAAGAATGA-AGCCGCGGACC----CTCGCAGT-GAGTGTTTTTT
chrom GGTGGGTTCCTTGGTCTCACTGACTTCAAGAATGA-AGCCGCGGACC----CTCGCAGT-GAGTGTACAA
right CCACCCGCCTCGGCCTCCCAAAGTGCTGGGATTACAGGCGTGAGCCACCACGCCCGGCCGAGTGTACAA
      111111111**1**1**1**1*11*1*1*11*1**1*1**1*11**1111*1*1*1*11*****2222
```

```
left  TTTTTTTTTTTTTTTTTTTGAGACAGCGTCTGGCTCTGTGCGCCAGGCTGGAGTGCA
chrom CTCTTAAGGTGGCACATCTG---GAGTTTGTTCCTT---CTGATGTTCCGGATGTG
right CTCTTAAGGTGGCACATCTG---GAGTTTGTTCCTT---CTGATGTTCCGGATGTG
      2*2**2222*222222*22*222*2**2**222**2222*22*2*2*2*22**22
```

Other Simple Repeat Low Complexity DNA LTR LINE SINE

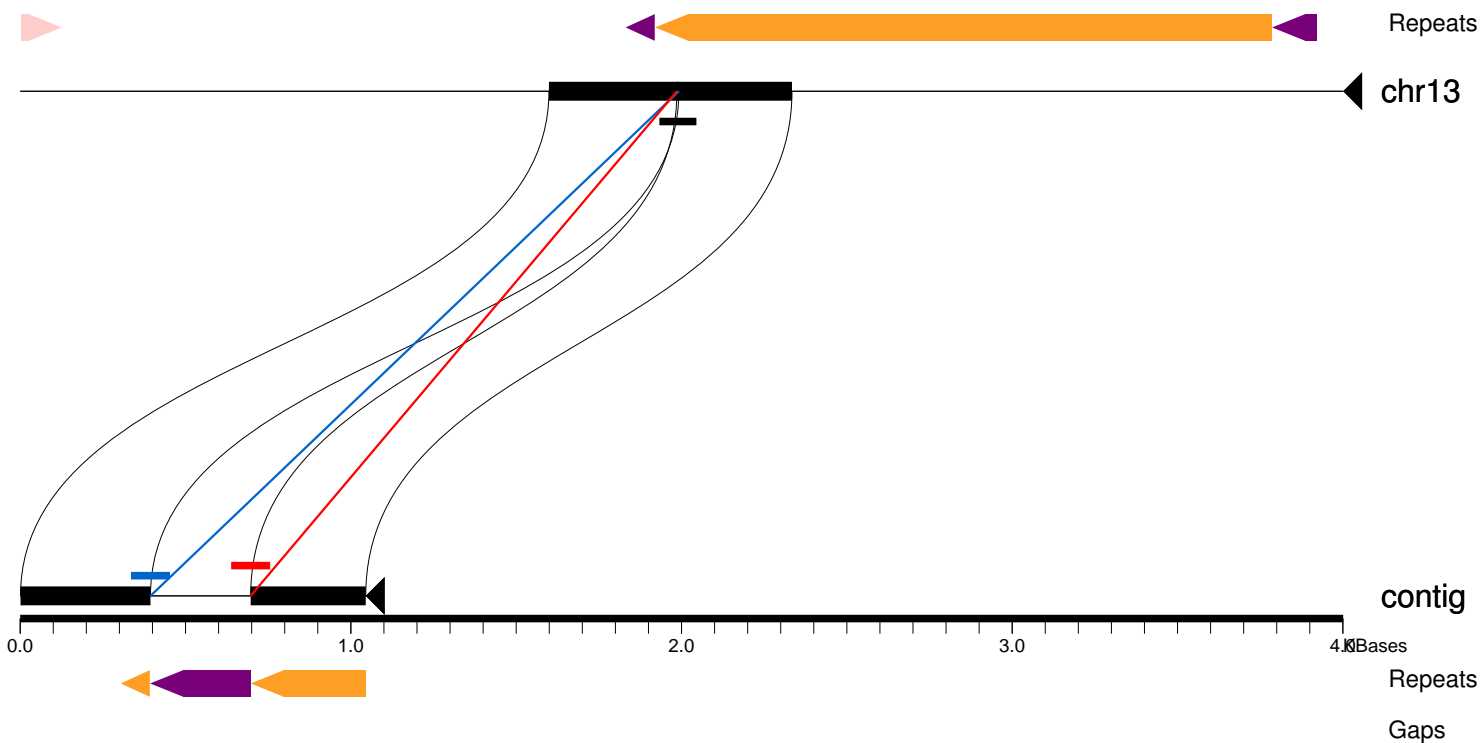



siteID: chr13\_98523883 Scafftig1 + Breakpoint: chr13:98523770  
chr13:98523723-98523829  
Overlap Length: 13 INS size: 330 Genotyped: No

```
left  GA-GCCAGA-TGAAATGAAGACCATTAAGTTTTTACAG--CTAAAAAACT-----CTCATTTTCATC
chrom GA-GCCAGA-TGAAATGAAGACCATTAAGTTTTTACAG--CTAAAAAACT-----CTCATTTTCATC
right TCCGCCCCTCGGCCTCCCAAAGTGCTGGGATTACAGGCGTGAGCCACCGCGCCCGGCCTCATTTTCATC
      111***1*11*1111111111*111*111*111*****111*1*111*1*1111111111*****
```

  

```
left  TTTTTTTTTTTTTTTTTTTTTTTTTTTTTTTTTTTTTTTTTTTTTTTTTTTTTTTTTTTTTTTTTTTTTTTTT
chrom TTTATATTGTATAGGTTTCATTAATATTTCAATCAATTACATAATTACAA-----
right TTTATATTGTATAGGTTTCATTAATATTTCAATCAATTACATAATTACAA-----
      **222222222222222222222222222222222222222222222222222222222222222222222222
```

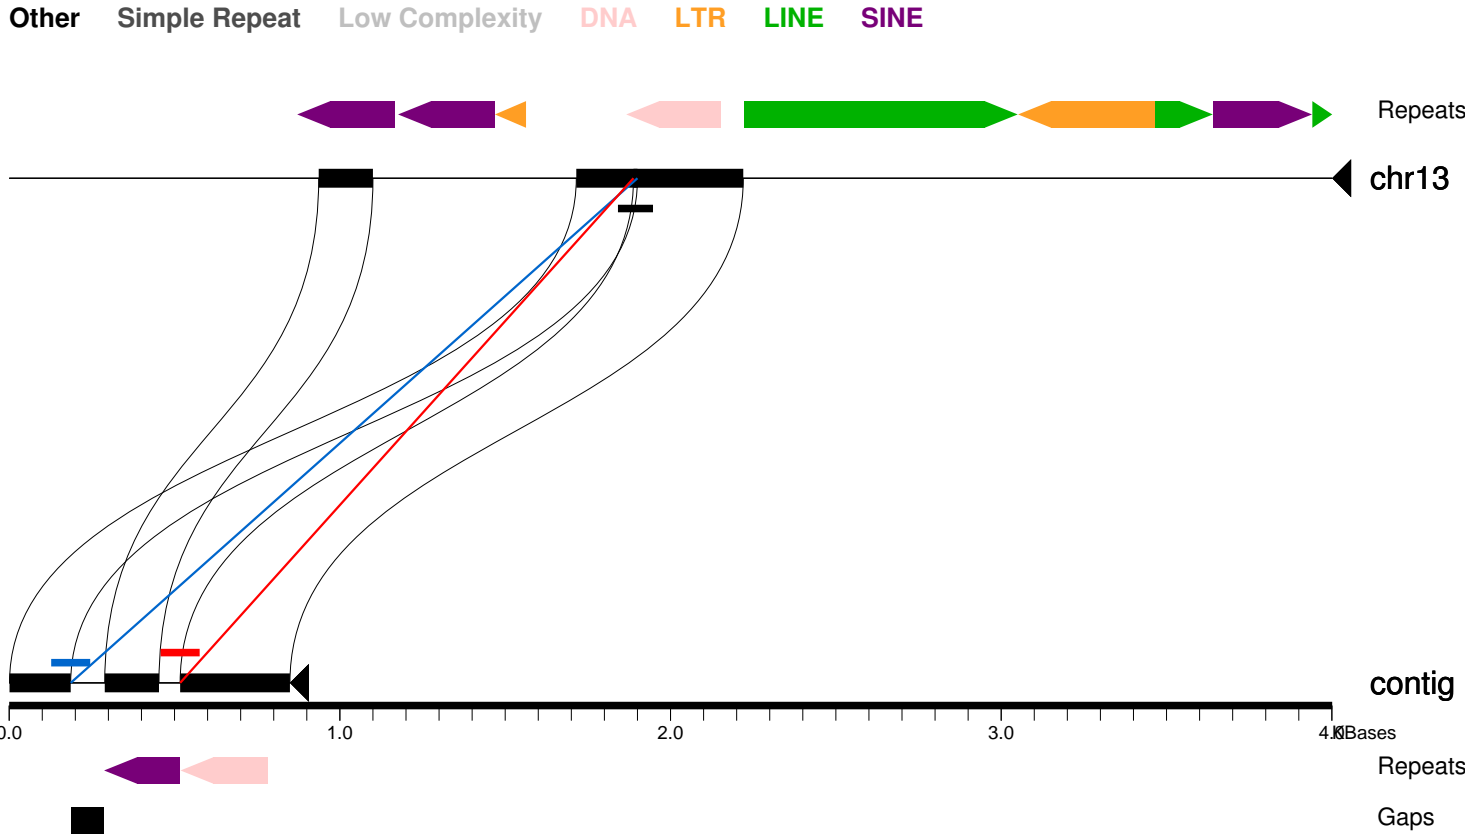

siteID: chr13\_98734903 Scafftig1 + Breakpoint: chr13:98734895

chr13:98734854-98734954

Overlap Length: 19 INS size: 406 Genotyped: No

```
left      TTTCTCTTTTCTTGTC-CTCACTTT-----TTAC-----CTAAAACCTCCTA---GACAGTTTG
chrom     TTTCTCTTTTCTTGTC-CTCACTTT-----TTAC-----CTAAAACCTCCTA---GACAGTTTG
right     CCACCCGCCTC--GGCCTCCCAAAGTGCTGGGATTACAGGCCTGAGCCACCGCGCCCGGCCGACAGTTTG
          111*1*111**11*2**1*1**111*1111111****111111111*1*111*1**11111*****
```

```
left      CCATTAACCTNNNNNNNNNNNNNNNNNNNNNNNNNNNNNNNNNNNNNNNNNNNNNNNNNNNNNNNNNNNN
chrom     CCATTAACCTTAAATCCTAATATAGATTGAACATTTGTGTCCCTCCAGAT-----
right     CCATTAACCTTAAATCCTAATATAGATTGAACATTTGTGTCCCTCCCAAAT-----
          ******22222222222222222222222222222222222N222222222222222222
```

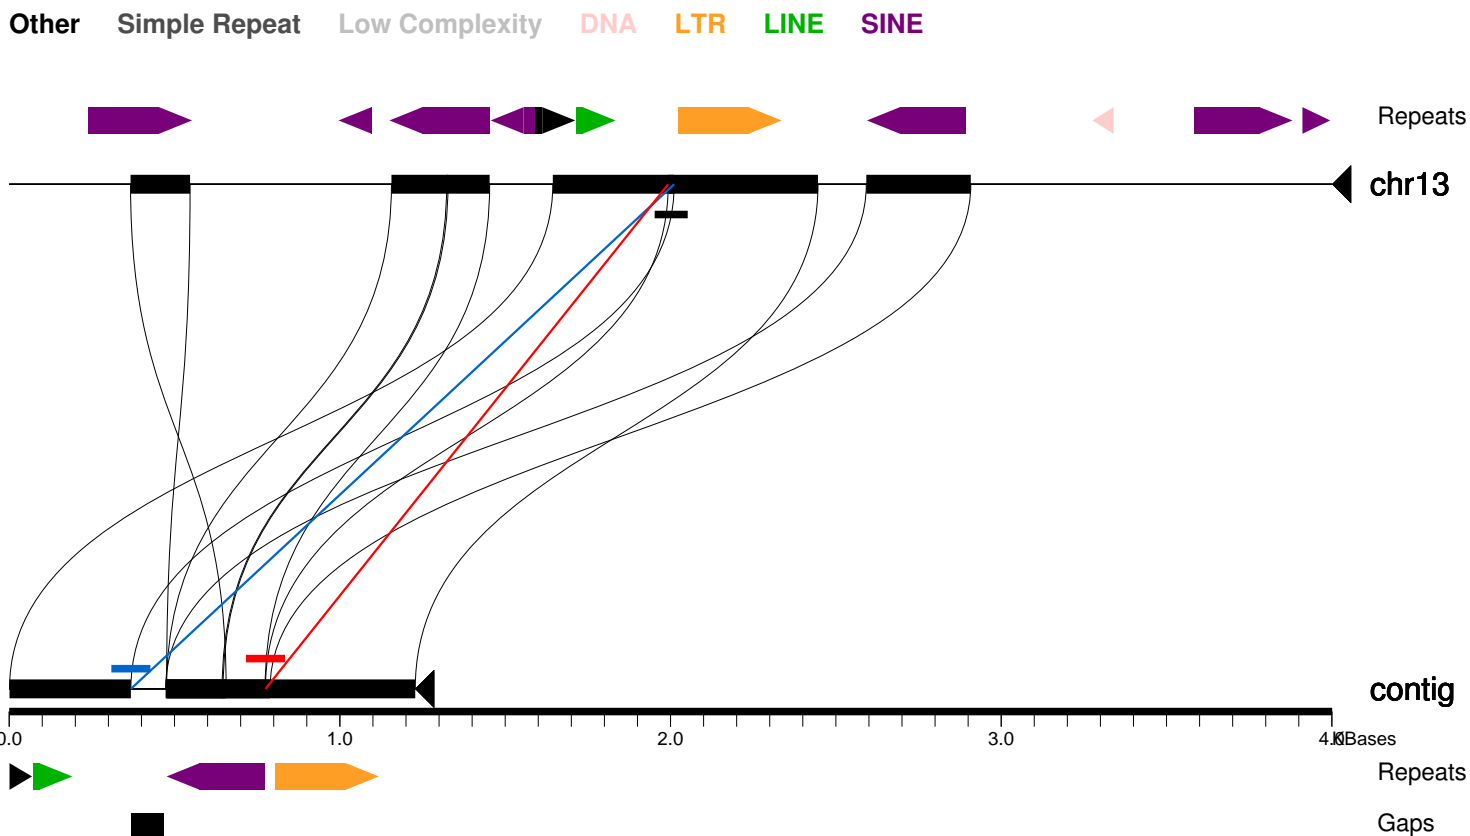



siteID: chr13\_99765010 Scafftig3 - Breakpoint: chr13:99764995

chr13:99764949-99765054

Overlap Length: 14 INS size: 443 Genotyped: No

```
left  --GATGGTCTTGTCTTTTTGAGAATATTGTATATATTGAAATCATACA-----GTATGTAGCC
chrom --GATGGTCTTGTCTTTTTGAGAATATTGTATATATTGAAATCATACA-----GTATGTAGCC
right CCGCCCGCCTCGGCCTCCCAAAGTGCTGGGAT-TACAGGCGTGAGCCACCGCGCCCGGCCGTATGTAGCC
      11*111*1**1*1*1*1111*11111*1*1**1**11*111*1*11**111111111111*****
```

```
left  TTTNNNNNNNNNNNNNNNNNNNNNNNNNNNNNNNNNNNNNNNNNNNNNNNNNNNNNNNNNNNNNNNN
chrom TTTCAAAGCAGCTTCTTTTACTCAGCATAATGCCTCTGAGTTTCACACA-----
right TTTCAAAGCAGCTTCTTTTACTCAGCATAATGCCTCTGAGTTTCACACA-----
      ***222222222222222222222222222222222222222222222222222222222222222222
```

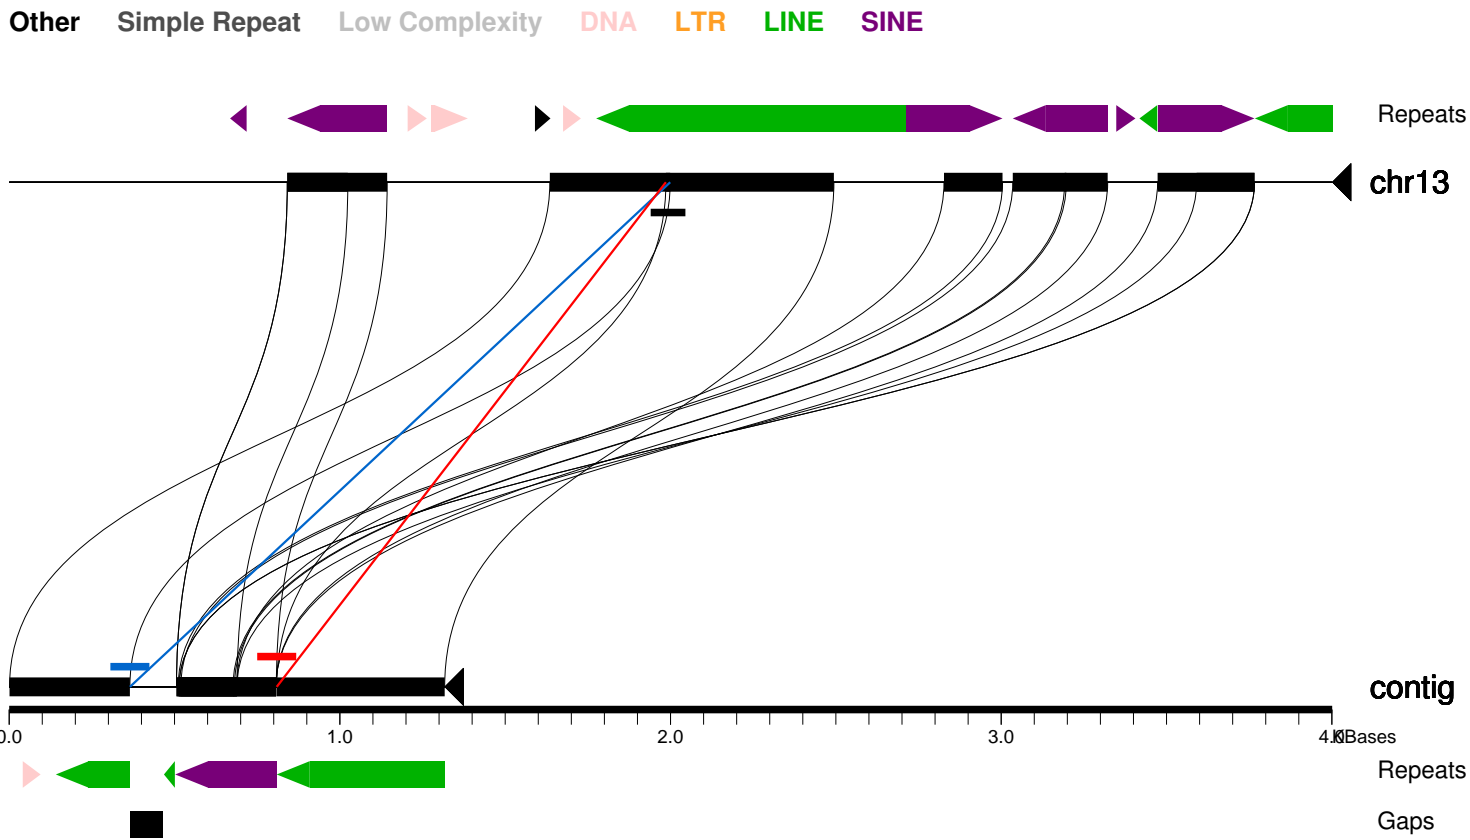

siteID: chr14\_20282011 Scafftig3 + Breakpoint: chr14:20282004

chr14:20281955-20282063

Overlap Length: 11 INS size: 297 Genotyped: Yes

```
left  ATGG-TCTTGCTCTCCTTGTG----GACTA-----GTATCTCTCTGTTTCTTCACCTTTTTTTTTTTTTTTT
chrom ATGG-TCTTGCTCTCCTTGTG----GACTA-----GTATCTCTCTGTTTCTTCACCTTTTTTTTTTTTTTT
right CCGCCTCGGCCTCCCAAAGTGCTGGGATTACAGGCCTGAGCCACCGCGCCCGGCCACCTTTTTTTTTTTTTT
      11*11**111***1*111***1111**1**11111**1111*1*1*111*1111**111******
```

```
left  TTTTTTTTGAGACGGAGTCTCGCTCTGTCGCCAGGCTGGAGTGCAGTGGCGCGATCTC
chrom AAGTCATACA-ACTATCTTTCCATTTAT-GTCTCTGCTAGTCTTCTTT-----TC-C
right AAGTCATACA-ACTATCTTTCCATTTAT-GTCTCTGCTAGTCTTCTTT-----TC-C
      222*22*22*2**2222*2**22*2*2*2*2*222***2*22*2*22*2222222**2*
```

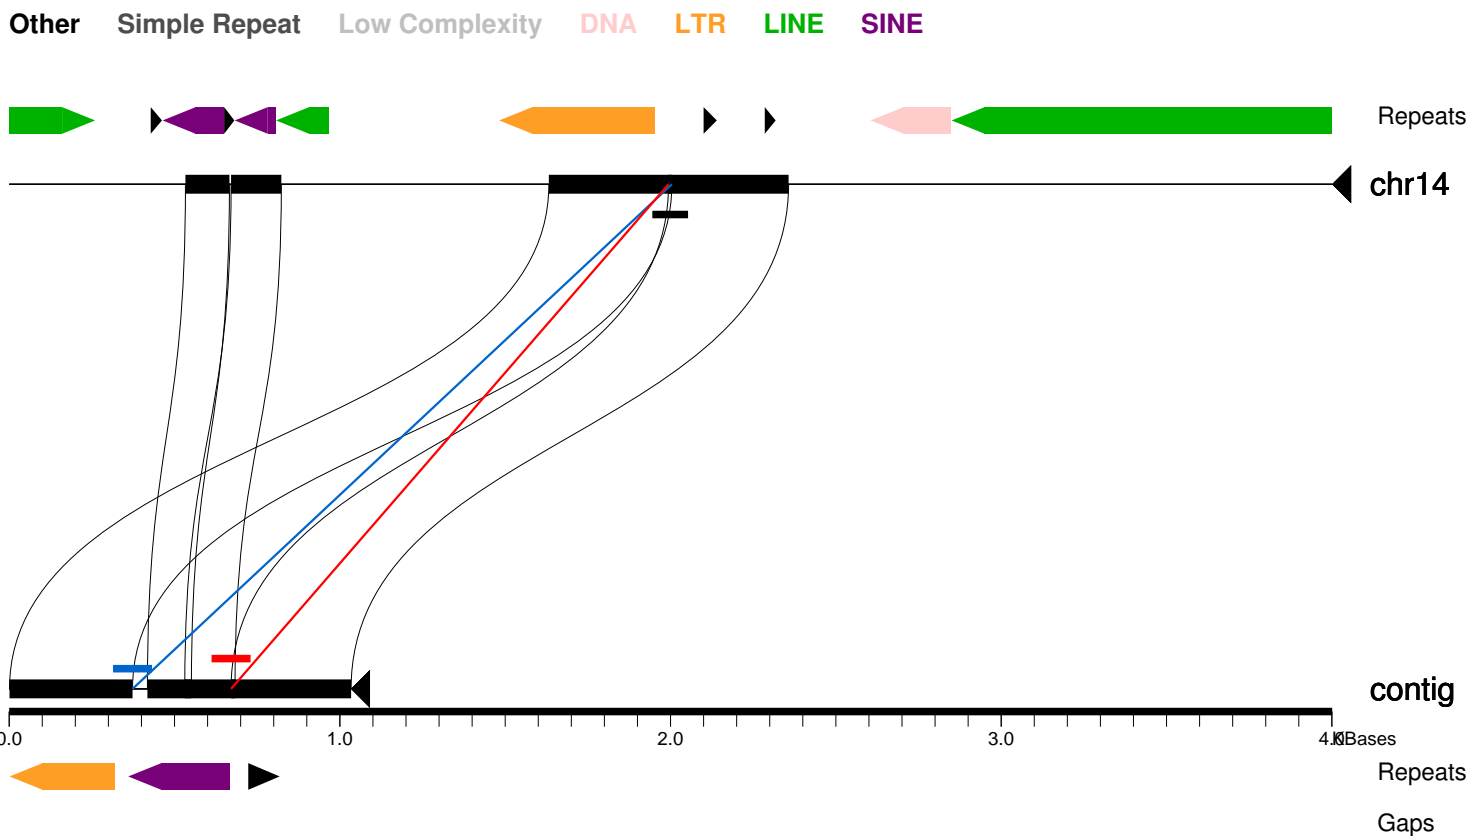

siteID: chr14\_20484295 Scafftig6 - Breakpoint: chr14:20484296

chr14:20484253-20484355

Overlap Length: 17 INS size: 352 Genotyped: Yes

```
left AA-----GCTTC--ACTTA-AAAATAATGTCA--ACA--CGTAAGACATGGGAAA-----CTGAATGTACA
chrom AA-----GCTTC--ACTTA-AAAATAATGTCA--ACA--CGTAAGACATGGGAAA-----CTGAATGTACA
right TCCACCCGCCTCGGCCTCCCAAAGTGCTGGGATTACAGGCGTGAGCCACCGCGCCCGGCCTGAATGTACA
      11111111**1**111**111***1*11**11*11***11***1**1**11*111111111*****
```

  

```
left TTATTATTATTATTATTATTATTTTTTTTTTTTTTTTTTTTTTTTTTTTTTTTTTTTTTTTTTTTTTTTTTTT
chrom TTATTAAAG-----TGTCTCTTCTCTTCTCTCTCTCTCCATTTACACACACAAAAC
right TTATTAAAG-----TGTCTCTTCTCTTCTCTCTCTCTCCATTTACACACACAAAAC
      *****22222222222222222222*2*2*2**22*2**22*2*2*222***222222222222
```

Other Simple Repeat Low Complexity DNA LTR LINE SINE

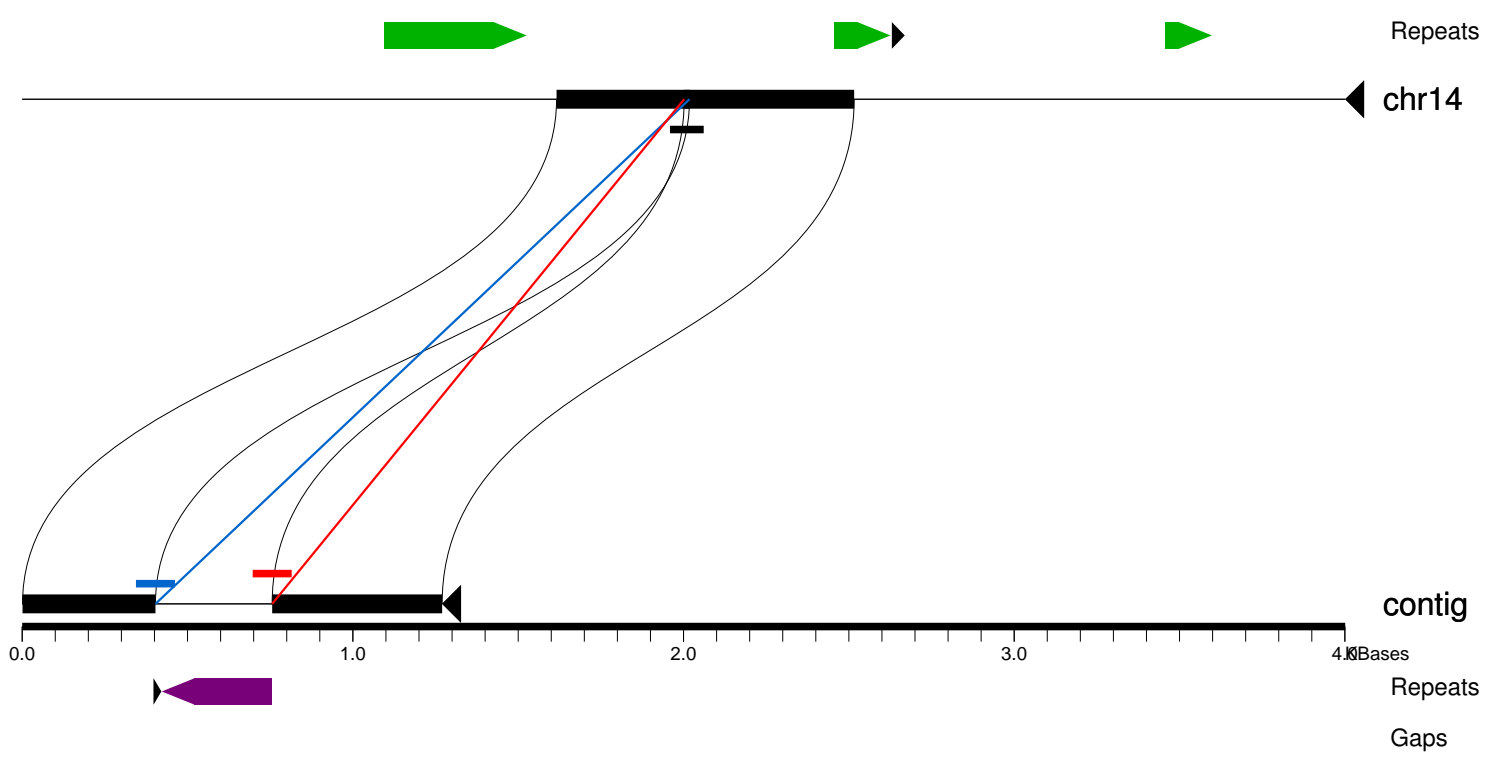



siteID: chr14\_20950437 Scafftig2 - Breakpoint: chr14:20950441

chr14:20950392-20950500

Overlap Length: 11 INS size: 317 Genotyped: Yes

```
left   TTCCT---CTTTATTTTGA-ACTGTTTCT---ATCTGAGCTCCTGTTGTAATTTAT---AATAAAAAAGTT
chrom  TTCCT---CTTTATTTTGA-ACTGTTTCT---ATCTGAGCTCCTGTTGTAATTTAT---AATAAAAAAGTT
right  GGCCTGGGCGACAGAGCGAGACTCCGTCTCAAAAAAAAAAAAAAAAAAATAAAAAAAAAAATAAAAAAATAAAAAAGTT
      11***111*111*1111**1***111***111*1111*11111*11111**11**1111*****
left   GGCCGGGCGCGGTGGCTCACGCCTGTAATCCCAGCACTTTGGGAGGCCGAGGCGGGTGG
chrom  AGTAGAATATAGTACTTCTCTTGTGTA--GCCTGACCTGATCTAGTTCTAT-----
right  AGTAGAATATAGTACTTCTCTTGTGTA--GCCTGACCTGATCTAGTTCTAT-----
      2*22*222222**222**2*222***222**2*22**22222**22*2*222222222
```

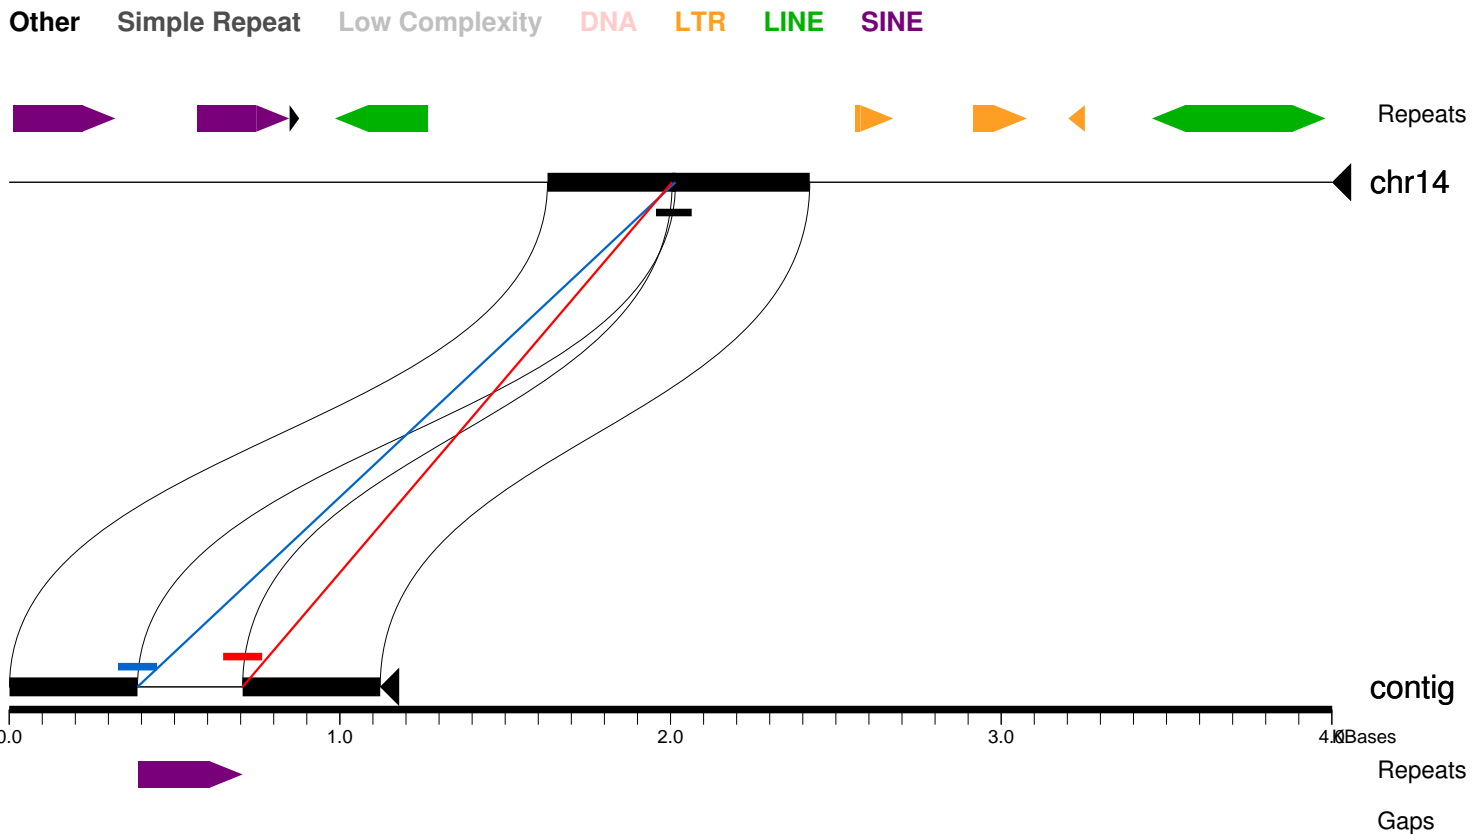













siteID: chr14\_27526134 Scafftig3 - Breakpoint: chr14:27526146

chr14:27526098-27526205

Overlap Length: 12 INS size: 308 Genotyped: Yes

```
left  AGCATT--GGCTTTGG-----AAAAGTTGGCATCATTTAACTATTTGCCCATGACAAAA-GTCTTA
chrom AGCATT--GGCTTTGG-----AAAAGTTGGCATCATTTAACTATTTGCCCATGACAAAA-GTCTTA
right -GCAGTCCGGCCTGGGCGACAGAGCAAGACTCCGTCTCAAAAAAAAAAAAAAAAAAAAAAAAAAAAAAAGTCTTA
      1***1*11***1*1**1111111111**1*1*11*11***111**11*11111111*11*1****1*****
```

```
left  CCGCCGGGCGCGGTGGCTCACGCCCTGTAATCCCAGCACTTTGGGAGGCCGAGGCGGGTGGA
chrom CCGCCGGGCGCGGTGGCTCACGCCCTGTAATCCCAGCACTTTGGGAGGCCGAGGCGGGTGGA
right CCTATGAGAAGTTTTGTAAA-----TATTTCTAAAGGATCTAAGATAGTGATG-----
      **222*2*22222*2*2*2*222222**2*2**222*222*222**222*2*22*222222
```

Other Simple Repeat Low Complexity DNA LTR LINE SINE

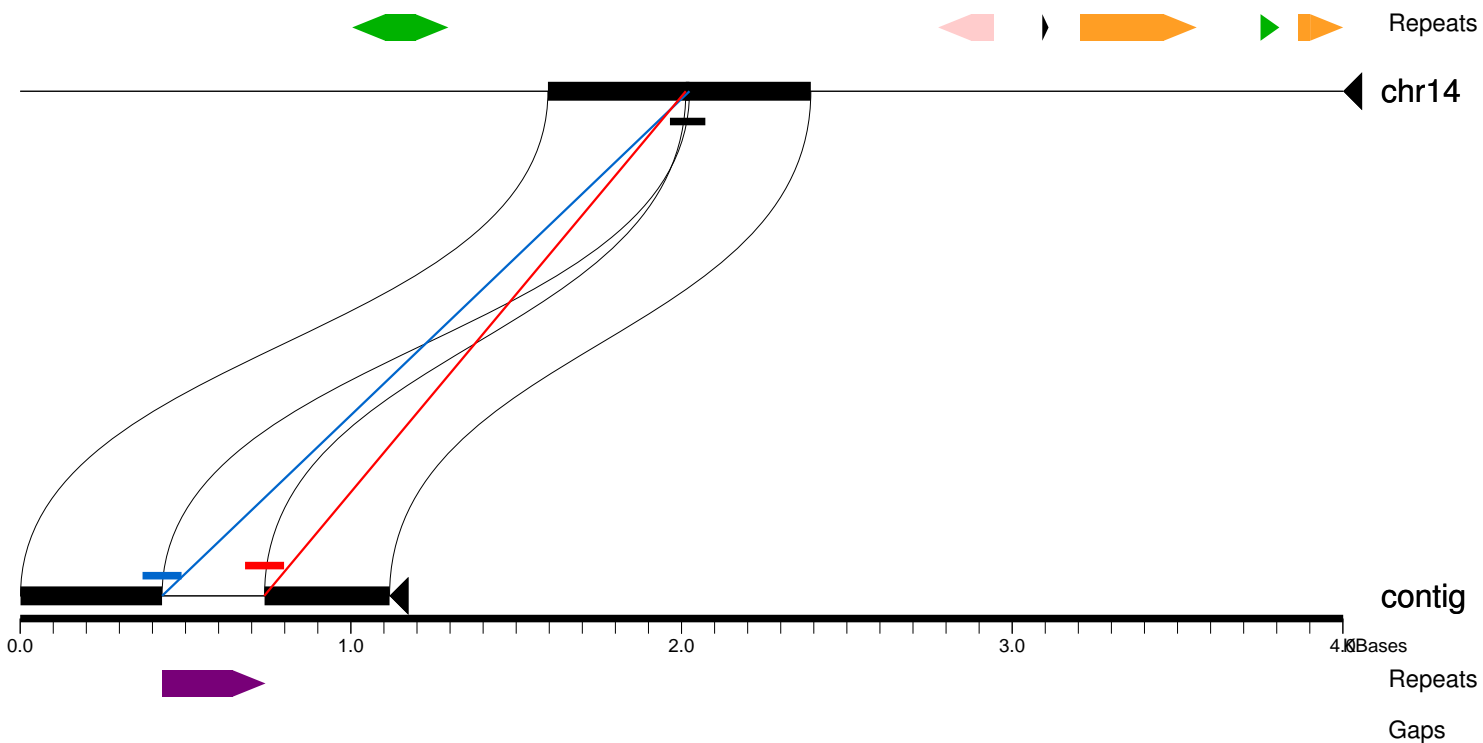

siteID: chr14\_28538404 Scafftig2 - Breakpoint: chr14:28538381

chr14:28538337-28538440

Overlap Length: 16 INS size: 288 Genotyped: Yes

```
left  AAAAAAT---GAAAAATG----ATAGTTTTTTTCATAATAAAG-----TATTATATTTAAAAATAGGAC
chrom AAAAAAT---GAAAAATG----ATAGTTTTTTTCATAATAAAG-----TATTATATTTAAAAATAGGAC
right CCGAGATCCCGCCACTGCACTCCAGCCTGGGCGACAGAGCGAGACTCCGTCTCAAAAAAATAAAAAATAGGAC
      111*11*111*11*1**111111**11*111*111*1*11*11111111*1*1*1*111*****

left  AGGTGGGGCCGGGCGCGGTGGCTCACGCCTGTAATCCAGCACTTTGGGAGGCCGAGGCGGGCG
chrom AGGT-----CCCTCTTCTTCA-----TAAGCAAATCAAATTTTCGTTC-ATCCTATCA
right AGGT-----CCCTCTTCTTCA-----TAAGCAAATCAAATTTTCGTTC-ATCCTATCA
      ***22222222*2*22*222***222222***2*22*2**222*2222*22*2*22*222*2
```

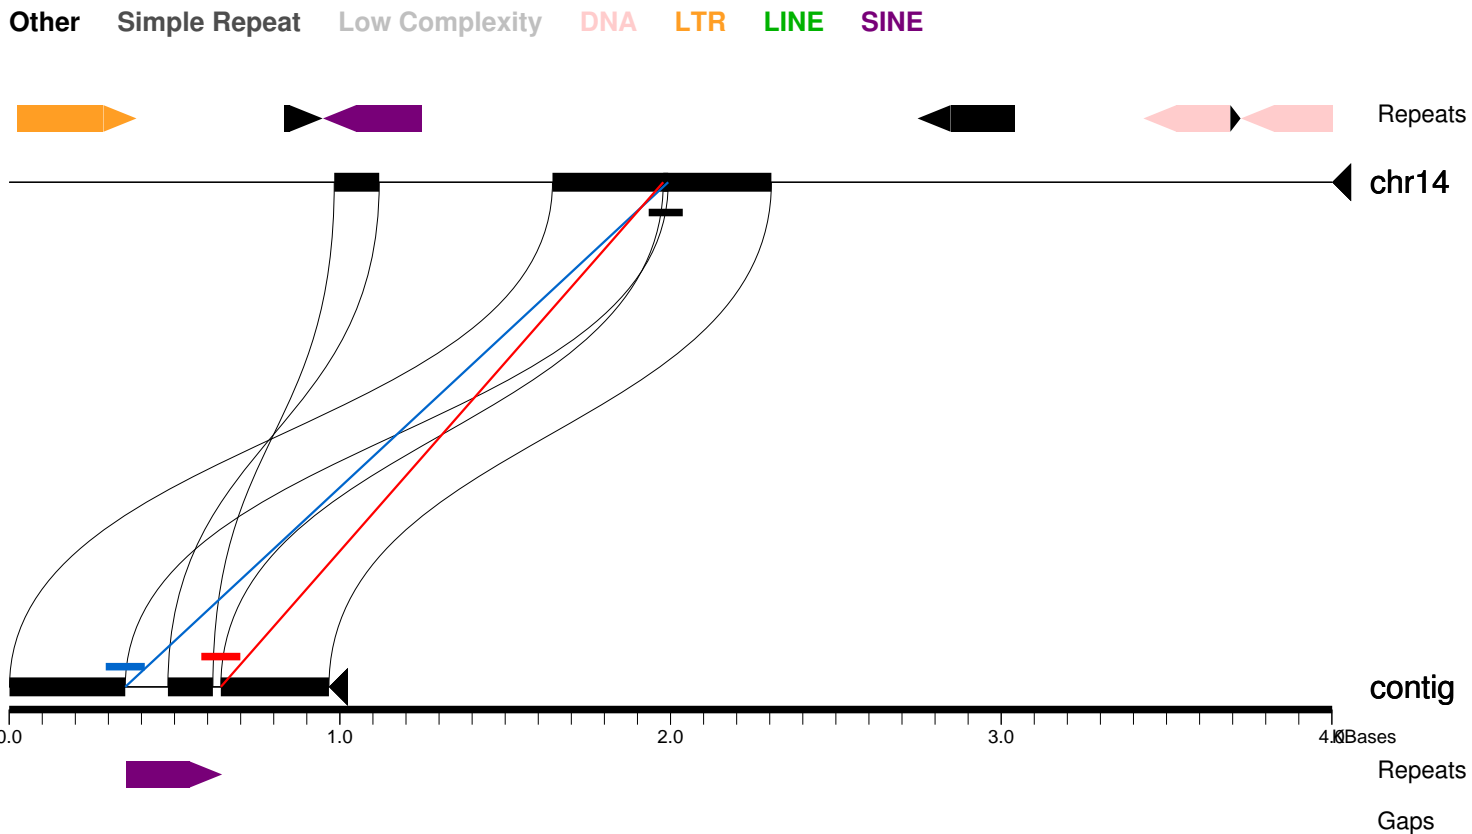







siteID: chr14\_32669235 Scafftig4 - Breakpoint: chr14:32669218

chr14:32669174-32669277

Overlap Length: 16 INS size: 235 Genotyped: Yes

```
left   TTTTGAACACT-----TGGTCTCAAGGG-----GTCTTCCCACCTTGGCCTCACAAAACTCTGGG
chrom  TTTTGAACACT-----TGGTCTCAAGGG-----GTCTTCCCACCTTGGCCTCACAAAACTCTGGG
right  CAGTCCGCAGTCCAGCCTGGGCGACAGAGCGAGACTCCGTCTCAAAAAAAAAAAAAAAAAAAAAAACTCTGGG
      111*111**1*111111***1*111**1*111111111****1111*1111111111*1*****
```

```
left   ACCTCCAGGAGATCGA-GACCATCCTGGCTAACAAAGGTGAAACCCCGTCTCTACTAAAAATACAA
chrom  ACCTC-ACCAGGCCTACGACCATT-----TATAAAGATTTT-----TCTCCCCTAA----TGGA
right  ACCTC-ACCAGGCCTACGACCATT-----TATAAAGATTTT-----TCTCCCCTAA----TGGA
      ****2*22**22*2*2*****222222**22**2*222222222****22****22222222*
```

Other Simple Repeat Low Complexity DNA LTR LINE SINE

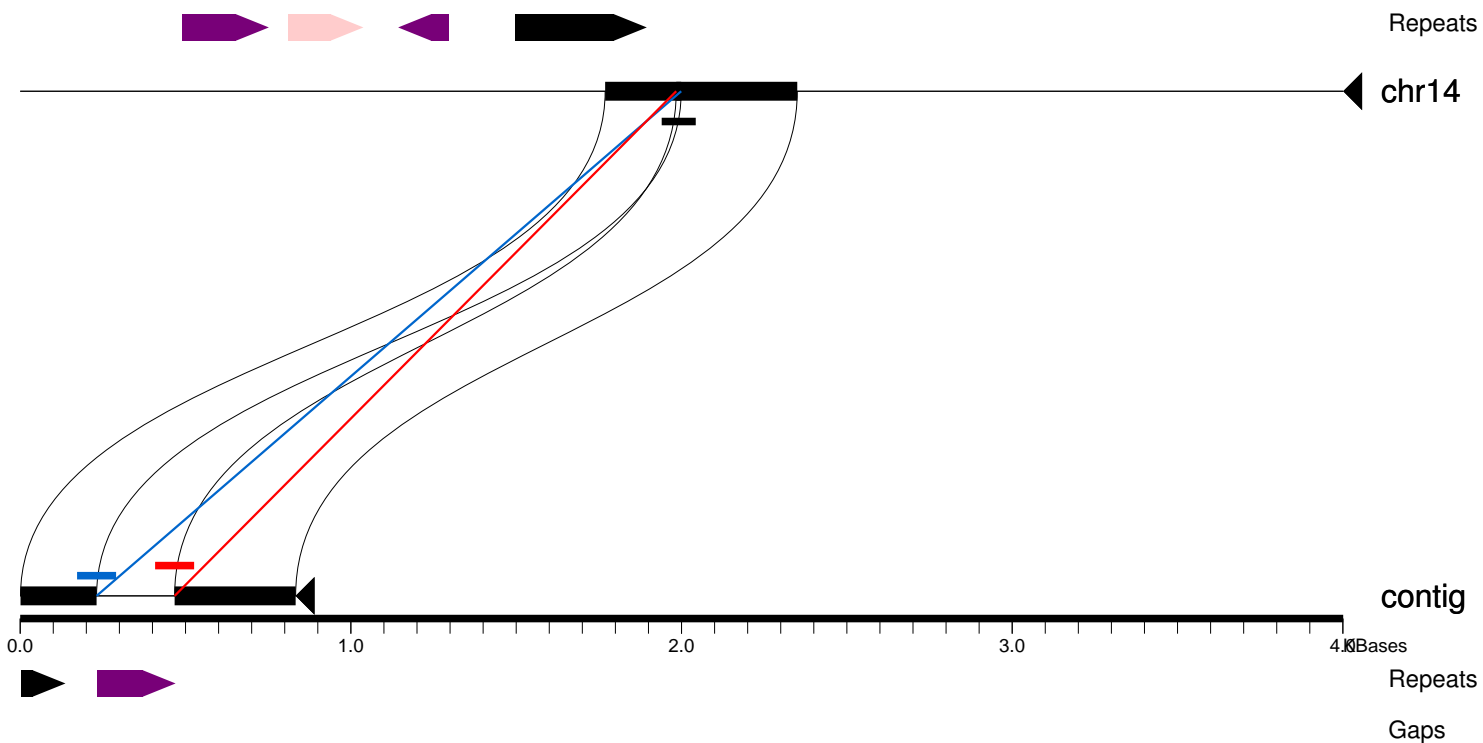





siteID: chr14\_34493356 Scafftig4 + Breakpoint: chr14:34493339

chr14:34493295-34493398

Overlap Length: 16 INS size: 297 Genotyped: Yes

```
left  ATTAGAGAAAGCACCTCCT-----CTCAGAATA-ATACTTTGTTGAAAAA-----TAAAGGCGGAC
chrom ATTAGAGAAAGCACCTCCT-----CTCAGAATA-AGACTTTGTTGAAAAA-----TAAAGGCGGAC
right CCGCCCGCCTCGGCCTCCCAAAGTGCTGGGATTACAGGCGTGAGCCACCGCGCCCGGCC-TAAAGGCGGAC
      111111*111111*****1111111*11*1*1*1*21*1*11111*111111111111******
```

```
left  TTTC-TTTTTTTTTTTTTTTTTTTTGGAGACGGAGTCTCGCTCTGTCGCCAGGCTGGAGTGCAGTGGC-
chrom TTTC-----AAGAAGAGCAGT-TCCATAAAT-GCAGAGAATAATAAATATTTTAA
right TTTC-----AAGAAGAGCAGT-TCCATAAAT-GCAGAGAATAATAAATATTTTAA
      ***222222222222222222**222*2***2**22*222*2**22*22*222222*2*2222
```

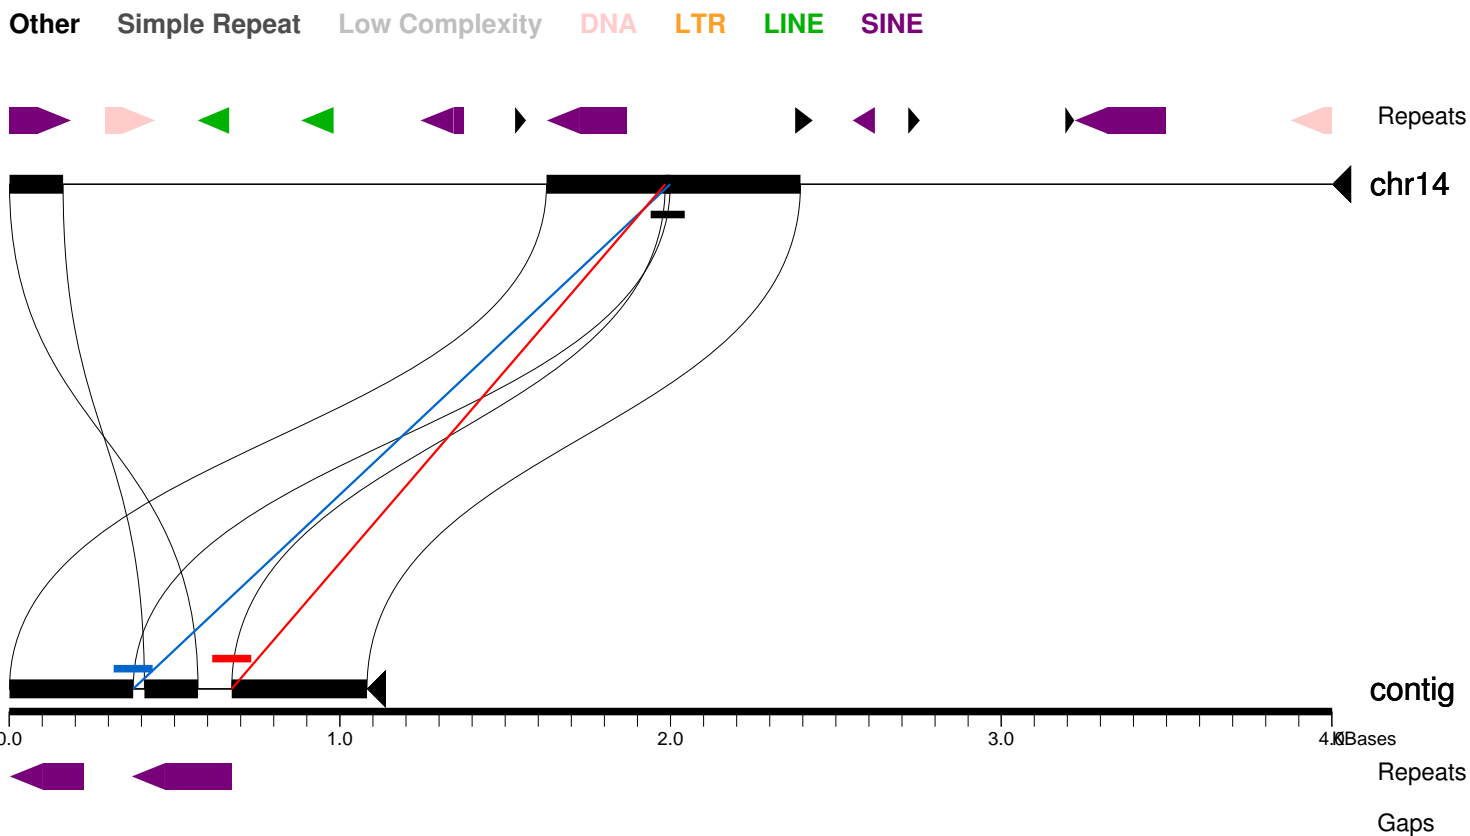



siteID: chr14\_36120185 Scaffitg3 + Breakpoint: chr14:36120148

chr14:36120102-36120207

Overlap Length: 14 INS size: 300 Genotyped: Yes

```
left  CTA----TATTTGC---CCATATGGCT---ATTGAGCACTTGATATTT-GCAAACGA--GGAATTACATT
chrom CTA----TATTTGC---CCATATGGCT---ATTGAGCACTTGATATTT-GCAAACGA--GGAATTACATT
right CCGCCCGCCTCGGCCTCCCAAAGTGCTGGGATTACAGGCGTGAGCCACCGCGCCCGGCCGGAATTACATT
      *111111111*11**111***1*11***111***111111*1***111111**111**111*****
```

```
left  TTTTTTTTTTTTTTTTTTTTTTGGAGACGGAGTCTCGCTCTGTGCGCCAGGCTGGAGTGCAGTGG
chrom TTTTCATGTGAACTTT-----AAACTAAATTTAG---TGTCAACT-GAAAGCAATACAC---
right TTTTCATGTGAACTTT-----AAACTAAATTTAG---TGTCAACT-GAAAGCAATACAC---
      **22*2*2222***222222*2**22*2*2*2*222*****22*22*222*2*2*2**2222
```

Other Simple Repeat Low Complexity DNA LTR LINE SINE

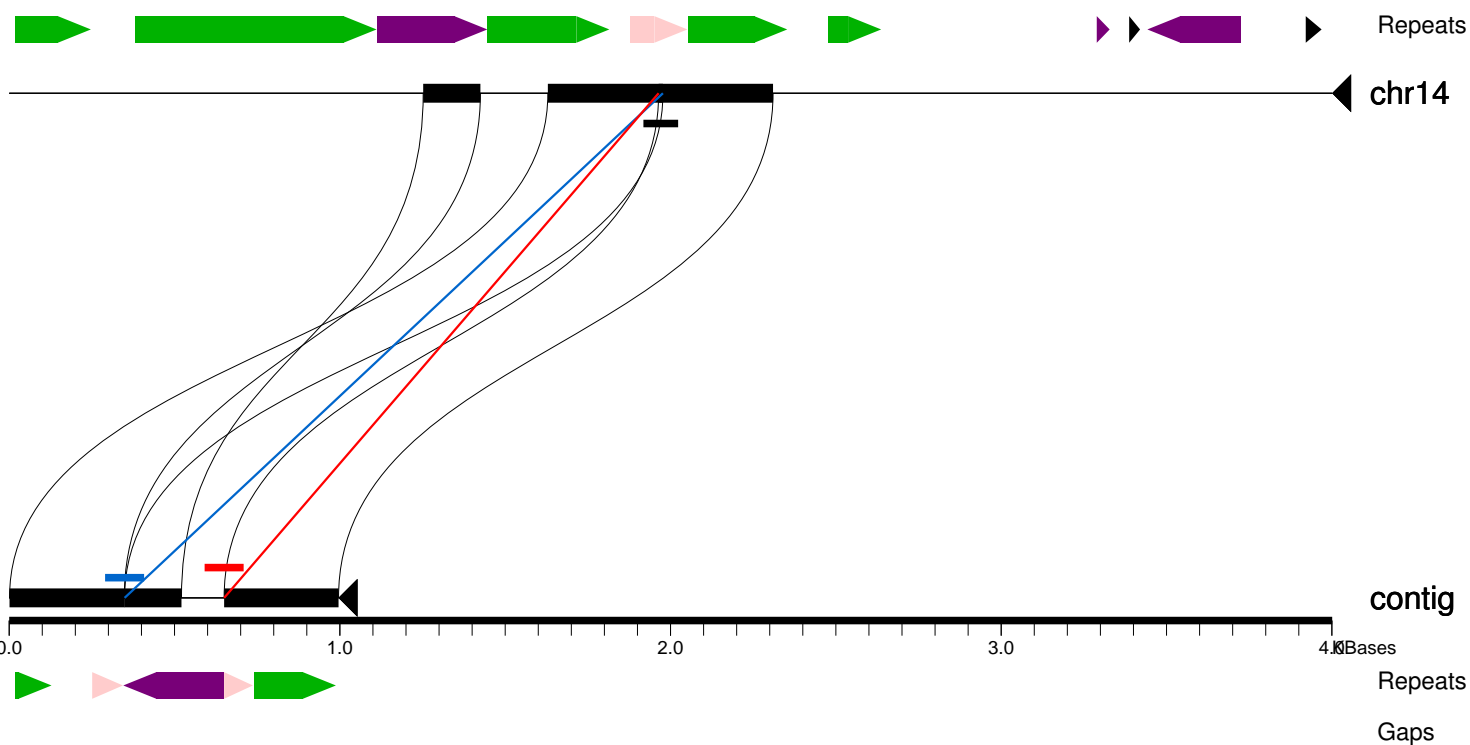







siteID: chr14\_39804826 Scafftig1 - Breakpoint: chr14:39804796

chr14:39804745-39804855

Overlap Length: 9 INS size: 416 Genotyped: No

```
left  --AACTGCT-----CTAACTTATCTCTTTTCTCATATGCCCTATTC-CAGACATTCTTTTAAAAAATANN
chrom --AACTGCT-----CTAACTTATCTCTTTTCTCATATGCCCTATTC-CAGACATTCTTTTAAAAAATATT
right CCACCCGCCTCGGCCTCCCAAAGTGCTGGGATTACAGGCGTGAGCCACCGCGCCCGGCC*AAAAAATATT
      11*1*1**111111**11*11*111**1111*1*1*1**111*11*1*1*111111111******22
```

```
left  NNNNNNNNNNNNNNNNNNNNNNNNNNNNNNNNNNNNNNNNNNNNNNNNNNNNNNNNNNNNNNNNNNNNNNNNN
chrom TTAATAATGTTATCTTTTATTTGAGATTACAGGGTACATGTGCAGGTT-----
right TTAATAATGTTATCTTTTATTTGAGATTACAGGGTACATGTGCAGGTT-----
      2222222222222222222222222222222222222222222222222222222222222222222222
```

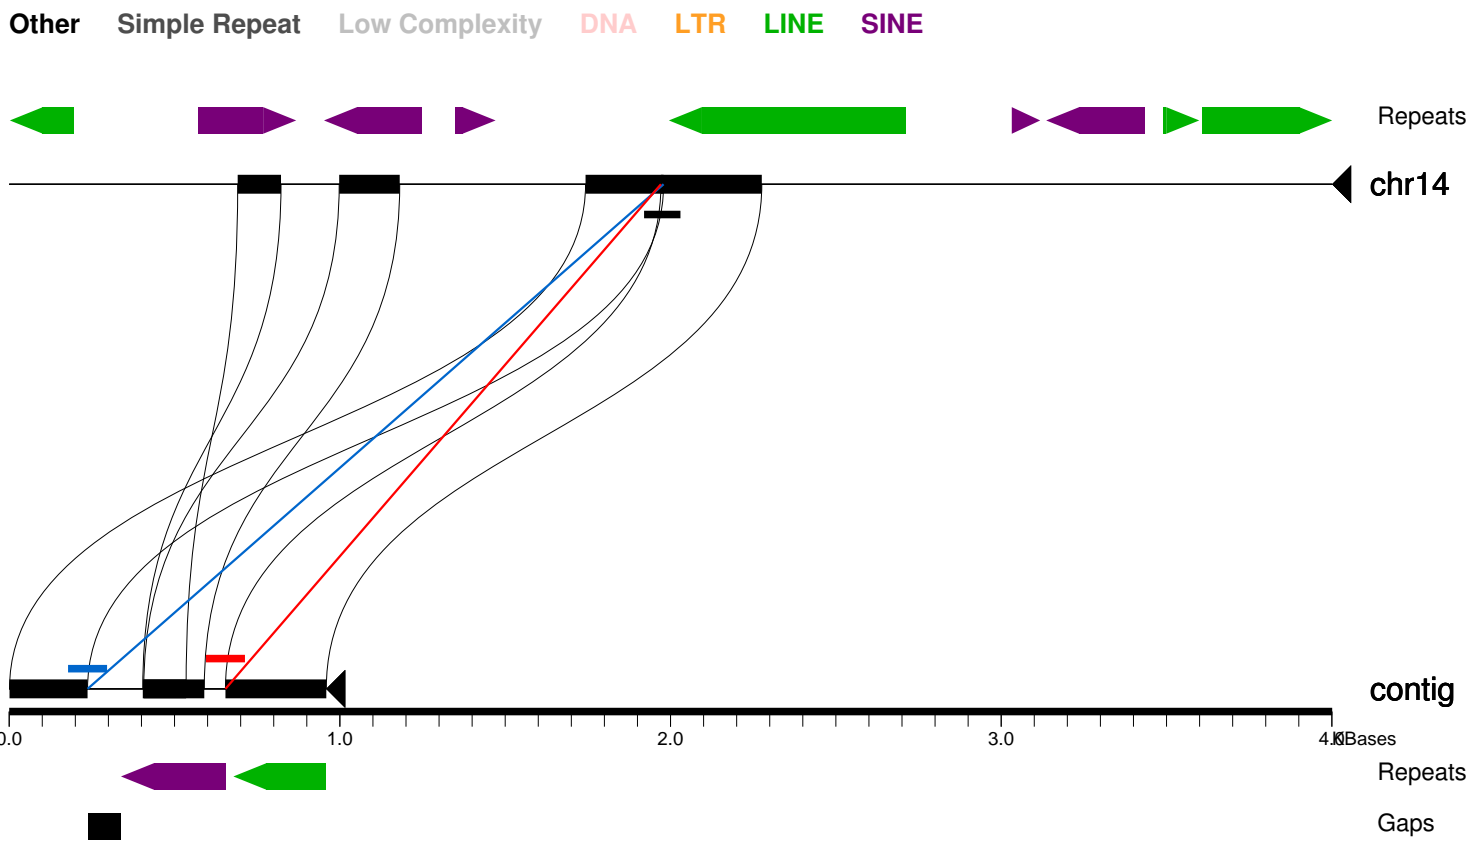

siteID: chr14\_40312975 Scafftig15 + Breakpoint: chr14:40312948

chr14:40312907-40313007

Overlap Length: 19 INS size: 303 Genotyped: Yes

```
left  -----TTTCTACCAATACAAACTCATTTGAAAA-----TGATCTA----GAAAAGA-GATTCTTATC
chrom -----TTTCTACCAATACAAACTCATTTGAAAA-----TGATCTA----GAAAAGA-GATTCTTATC
right  CCGCCCGCCTCGGCCTCC-CAAAGTGCTGGGATTACAGGCGTGAGCCACCGCGCCCGGCCGATTCTTATC
      1111111111**11**1111****1*11*1*1*1111111111***1*1*1111*1111*11*****

left  AACTTTTTTTTTTTTTTTTTTTTTTTTTTTTTTTTGGAGACGGAGTCTCGCTCTGTCGCCCAGGCTGGAGTGCAG
chrom AACTCTTTTGGGAAAAGCTGAGTGTGG-GAGAAG-----CTGAGGCAG-GGCT----TGC--
right AACTCTTTTGGGAAAAGCTGAGTGTGG-GAGAAG-----CTGAGGCAG-GGCT----TGC--
      ***2***222222222*222*2**222****2*2222222222***22*222****2222***22
```

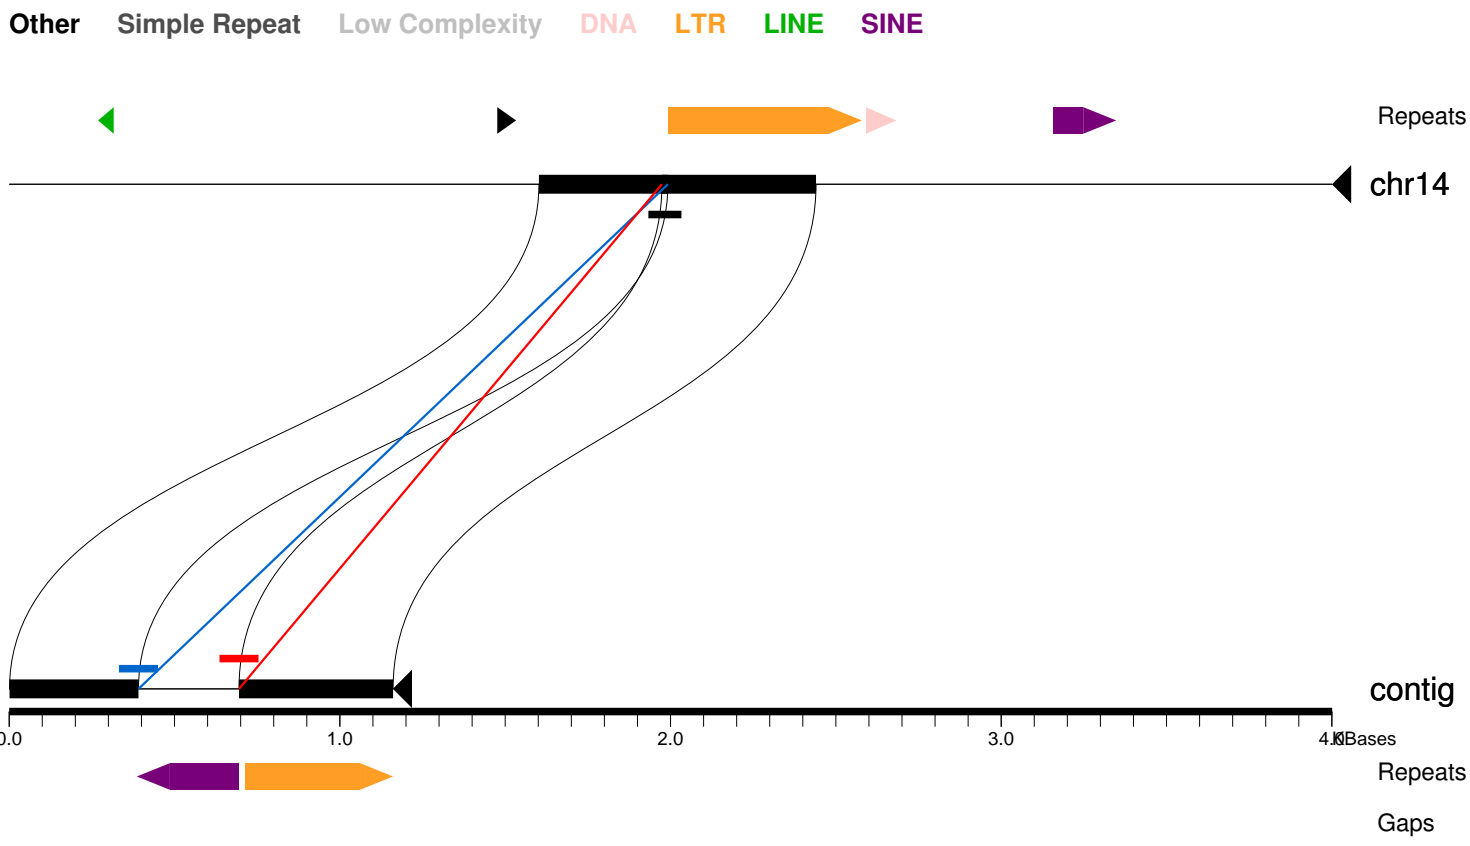



siteID: chr14\_40592352 Scafftig5 + Breakpoint: chr14:40592430

chr14:40592384-40592488

Overlap Length: 14 INS size: 118 Genotyped: Yes

```
left  ACATA-----TTCATGCTTCACTGAGTAATGTTCT-GTGATTCA---TTCTCATC-GTTTCTTTCT
chrom ACATA-----TTCATGCTTCACTGAGTAATGTTCT-GTGATTCA---TTCTCATC-GTTTCTTTCT
right CAATCTCGGCTCACTGCAGGCTCCGCCCTGGGGTTCACGCCATTCTCCTGCCTCAGCCGTTTCTTTCT
      11**111111111111*1**1***1*1*1111*111****11*11****111111*****1*1*****
```

```
left  TTCCTTTTTTTTTTTTTTTTTTTGAGACGGAGTCTCGCTGTCGCCAGGCTGGAGTGCAGTGGCGC
chrom TTCCTAAAGCTGATTAATTCTTTAAAG----CTAGCTCAAGTTCA-----CATTTACCT
right TTCCTAAAGCTGATTAATTCTTTAAAG----CTAGCTCAAGTTCA-----CATTTACCT
      ***22222*22**22**2*222*2*2222**2***222*22**2222222222**2*22*22
```

Other Simple Repeat Low Complexity DNA LTR LINE SINE

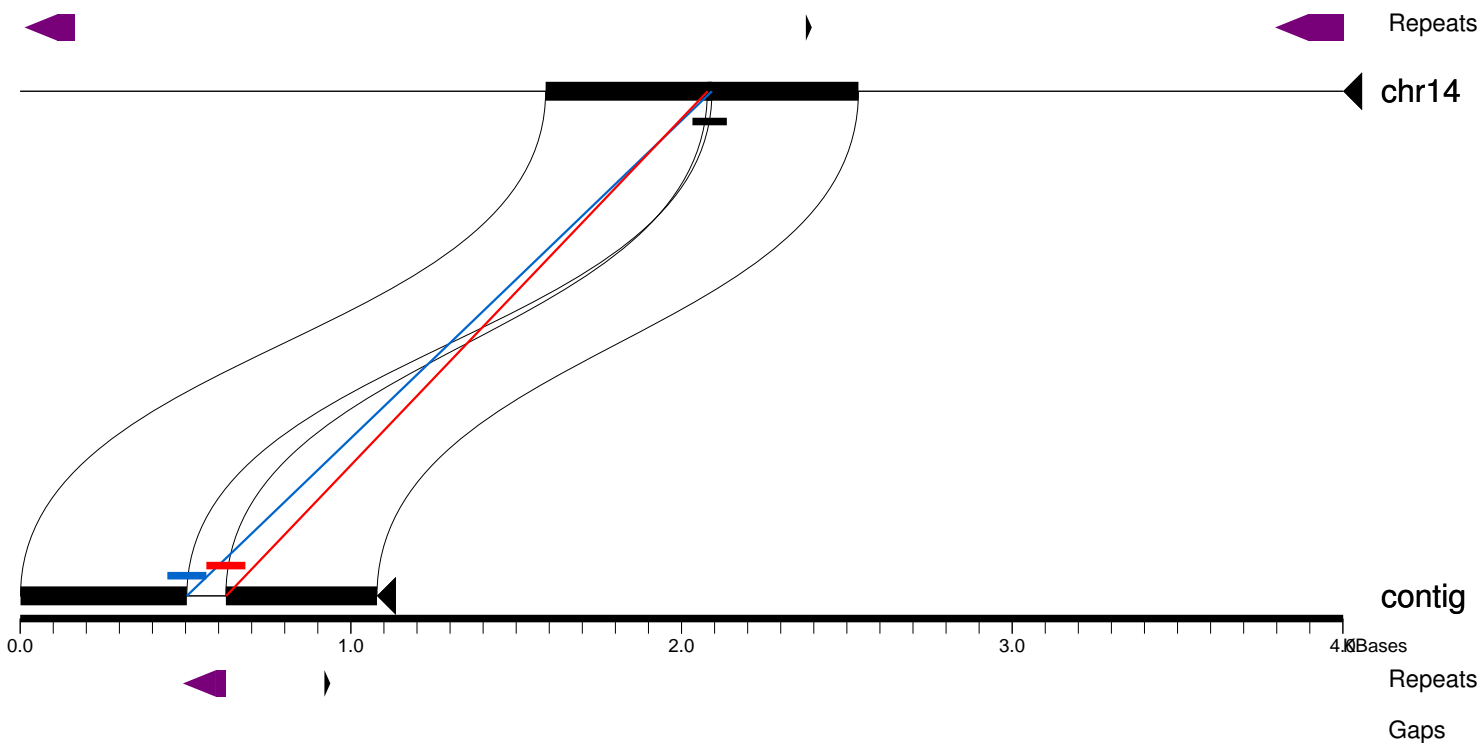

siteID: chr14\_40882890 Scafftig4 - Breakpoint: chr14:40882887

chr14:40882841-40882946

Overlap Length: 14 INS size: 318 Genotyped: Yes

```
left      T-----TTCTTGCTTACATTGTTCCAGCTTT--GGCCATTGGTTACAGTT---GGT--TCCTTTGTCCT
chrom     T-----TTCTTGCTTACATTGTTCCAGCTTT--GGCCATTGGTTACAGTT---GGT--TCCTTTGTCCT
right    CGCCCGCCTCGGCCTCCCAAAGTGCTGGGATTACAGGCGTGAGCCACCGCGCCCGGCCCTCCTTTGTCCT
          111111111**111**11**11**1*11*11**111*1*1*11*11**1*11111**111*****
```

```
left      CTAATTTTTTTTTTATTTTTTTATTTTTATTTTTTTTTTTTTTTGAGACGGAGTCTCGCTCTGTCGC
chrom     CTA-----ACGTGTCCTCATCACTTTGTATTTTCAGA-ACTTCCTTACCTTCTGG---
right    CTA-----ACGTGTCCTCATCACTTTGTATTTTCAGA-ACTTCCTTACCTTCTGG---
          **222222222*22*2*22222*2*2***2*2***22**2**2222*22*22***2222
```

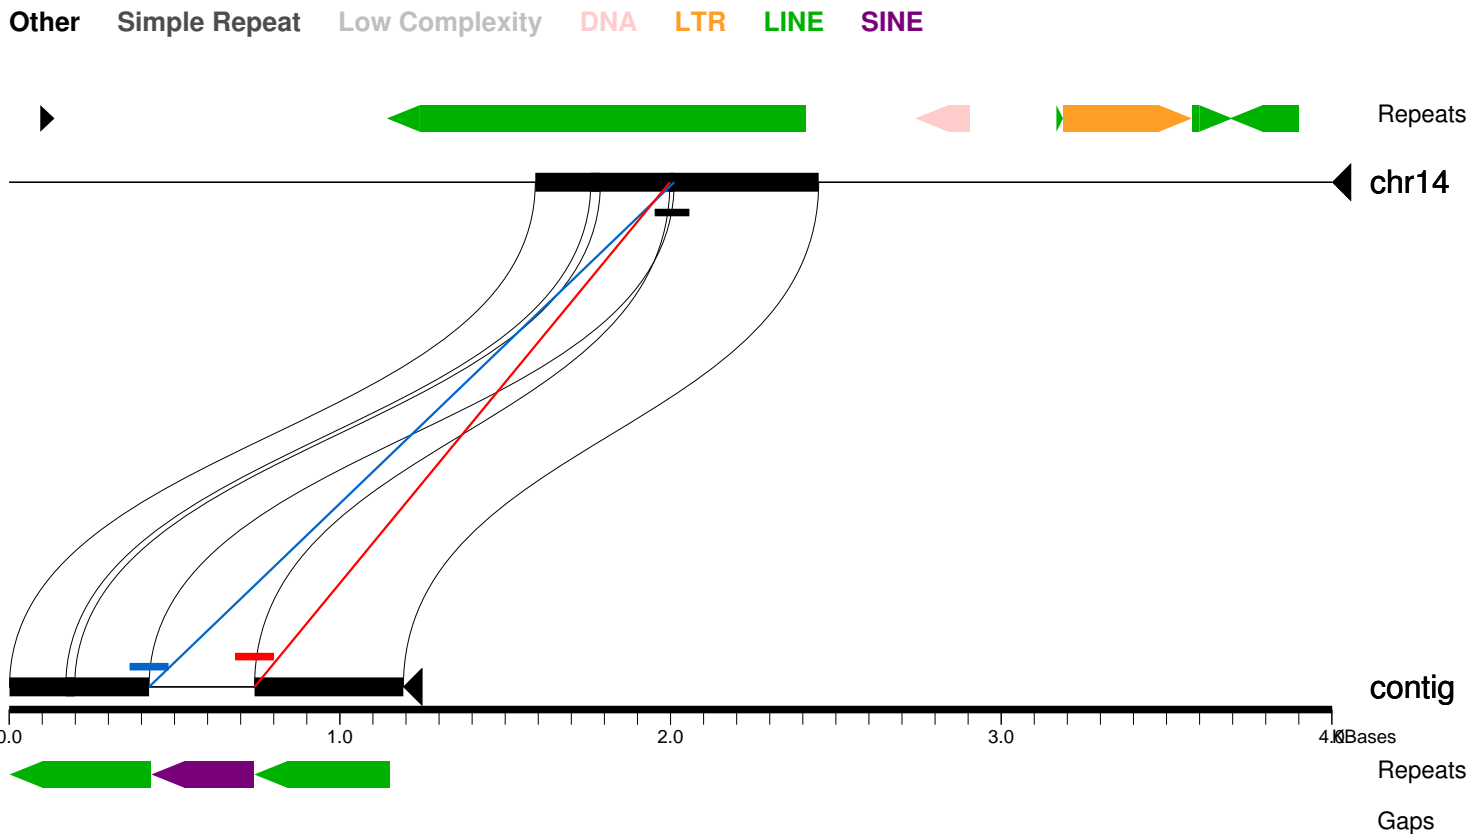







siteID: chr14\_41926827 Scafftig1 - Breakpoint: chr14:41926821

chr14:41926763-41926880

Overlap Length: 2 INS size: 420 Genotyped: No

left TTGTTTCTTCTGACCTATTTTACTATTGTTGGTTATGGC-TTATATTTTCCTTCTTTTTGTTTTNNNNNNNNN  
chrom TTGTTTCTTCTGACCTATTTTACTATTGTTGGTTATGGC-TTATATTTTCCTTCTTTTTGTTGAGTGTCTAA  
right CCGCCCGCCTCGGCCTCCCAAAGTGCTGGGATTACAGGCGTGAGCCACCGCGCCCGCCGTTGAGTGTCTAA  
11\*11111111\*1\*\*\*11111\*1\*11\*\*1111\*111\*\*\*1\*1\*1111111\*11\*11111\*22222222

left NNNNNNNNNNNNNNNNNNNNNNNNNNNNNNNNNNNNNNNNNNNNNNNNNNNNNNNNNNNNNNNNNNNNNNN  
chrom TTTTATTTGATGCTTTTATATTGTAACCTAATGTACTTTAGAGAGCCCA-  
right TTTTATTTGATGCTTTTATATTGTAACCTAATGTACTTTAGAGAGCCCA-  
2222222222222222222222222222222222222222222222222222222222222222222222222222222

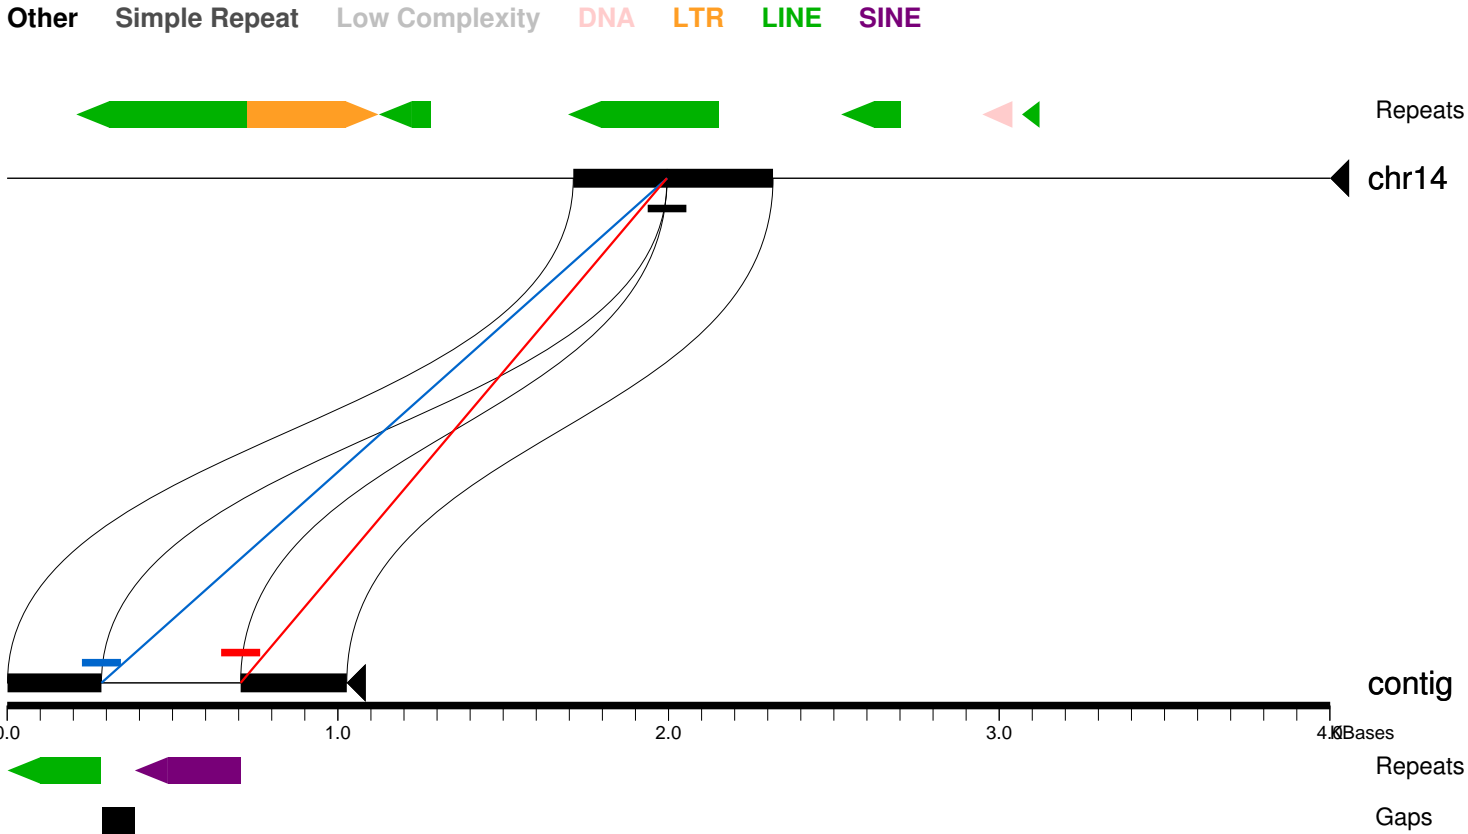

siteID: chr14\_42511221 Scafflig2 + Breakpoint: chr14:42511224

chr14:42511064-42511411

Overlap Length: 28 INS size: 293 Genotyped: Yes

```
left  T-----TTTTATTCTGAGGCATCTGTTGTAATGTCCCCTTTTTCATTTAT
chrom TCATAAGATAGTCTCGTATGATCCTTTTTTATTTCTGAGGCATCTGTTGTAATGTCCCCTTTTTCATTTAT
right C--TAATTTTTTT--GTAT-----TTTTAGTAGAGACGGG---GTT-----TCACCGTTTTA-----
1 222NN2NN2 2222 *****1*111**1*11111***111111**1**1****1111111
```

```
left  GATTTTGTGTGCTTGTAGCTTCTCTTTTTTCTTACTTAGTCTAGCAAGGGTTTCTTTTATCTTCTAAATAA
chrom GATTTTGTGTGCTTGTAGCTTCTCTTTTTTCTTACTTAGTCTAGCAAGGGTTTCTTTTATCTTCTAAATAA
right -----GCCGGGATGGTCTCGATCTCCTGACCTCGTGATCCGCCCGCCTCGGCCTC--CCAAAGTG
111111111111**11*1*111****11*1*1**1**1*1**1111*1111*11**1111**11*1**111
```

```
left  AACCAACTCTCAGTTTGTAGTTGATTTTTTATTTTT--TATT-TTTTTAT-----TTT-----
chrom AACCAACTCTCAGTTTGTAGTTGATTTTTAATTTTTAATATTATTTTTTATGATGTATTTGTAGTATTAAGTT
right CTGGGACTA-CAGGCATGA-GATTTTTAATTTTTAATATTATTTTTATGATGTATTTGTAGTATTAAGTT
11111**11**1111*11*****2*****22*****2*****222222***222222222222
```

```
left  -----TTTTTTTTTATTTTTTTTT-ATTTTTTTGAGACGGAGTC--TCGCTCTGTCGCCAGGCT----GG
chrom AGGTGGTTTATTTTATATATTTTT-CTTTTTTTA-ATGTAGGCAATTACTACTACAACCTCTCTTTTGTAGT
right AGGTGGTTTATTTTATATATTTTTCTTTTTTTA-ATGTAGGCAATTACTGCTACAACCTCTCTTTTGTAGT
222222***2*****2*2*****12*****2*2*2**2*22*22*N222*22*2222**2222*2
```

```
left  AGTGCAGTGGCGGGATCTCGGCTC-----ACTGCAAGCTCCGCCCTCCGGGT-TACGCCATTCTC--
chrom ACTGTTTTTGCAACATTTTGTGTTTTGGTATTGTGTTTTTCATTTTTCTTTTGTCTTTTGTAGTATTTAAAA
right ACTGTTTTTGCAACATTTTGTGTTTTGGTATTGTGTTTTCT-----TTTTTTCT-----
*2**222*2**222**2*2*22*2222222*2**2222**N1111111111 1N111111111111
```

Other Simple Repeat Low Complexity DNA LTR LINE SINE

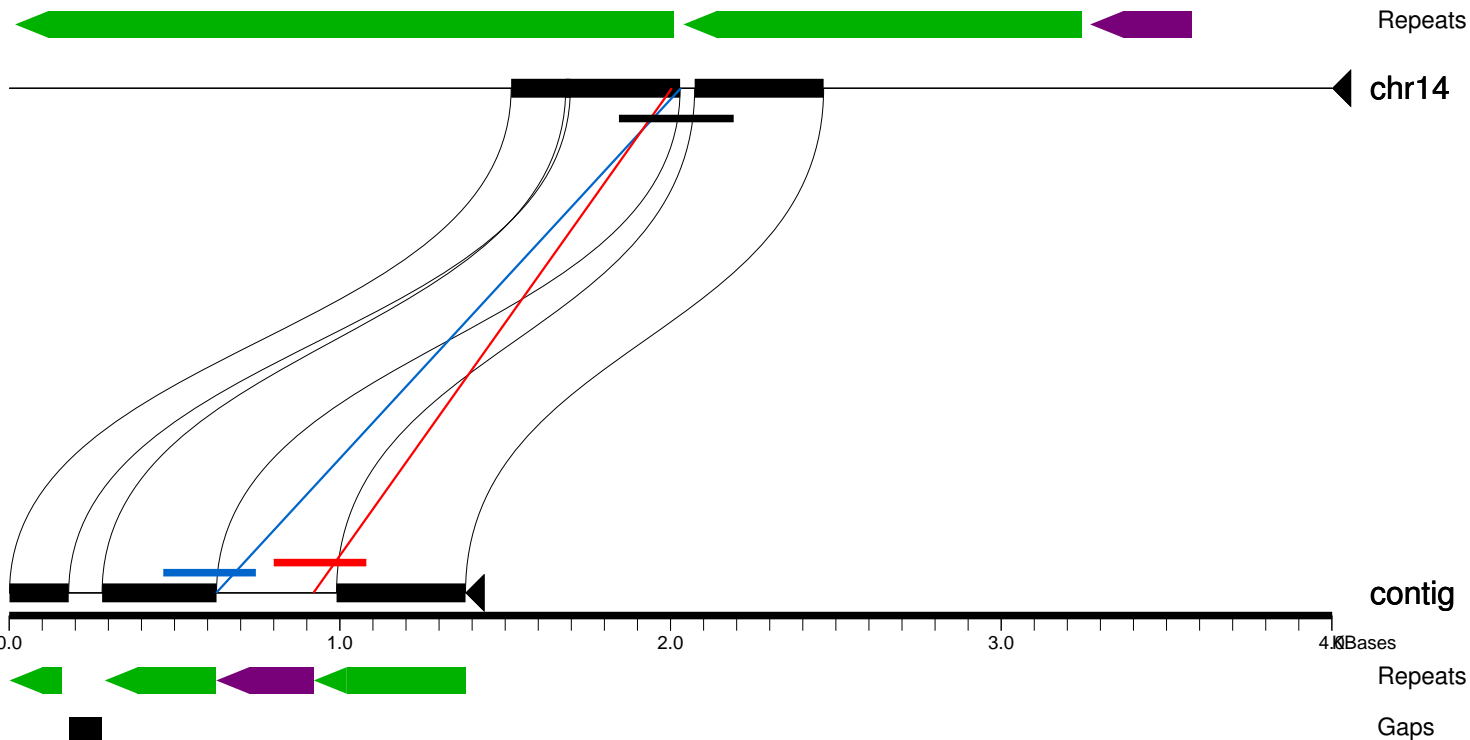

siteID: chr14\_43478798 Scaffoldig2 - Breakpoint: chr14:43478793

chr14:43478746-43478852

Overlap Length: 13 INS size: 300 Genotyped: Yes

```

left  TT----TACA---TTGA--AAATTACTAAATT--GTCACATTACTTAATAATCCTTAGAAA-GATGCAAA
chrom TT----TACA---TTGA--AAATTACTAAATT--GTCACATTACTTAATAATCCTTAGAAA-GATGCAAA
right CTGCACTCCAGCCTGGGCGACAGAGCGAGACTCCGTCTCAAAAAAAAAAAAAAAAAAAAAAAAAAAGATGCAAA
      1*1111*1**111*1*111*1*111*1*1*1*11***1**11*111*1**11111*1***1*****
left  TTGGCCGGGCGTGGTGGCTCACACCTGTAATCCCAGCACTTTGGGAGGCCGAGACGGGCGG
chrom TTAAAACA--ATCCCACTTTTCAGGTGT--TGCAAGGA---TGGGCATTGTAGTCT-----
right TTAAAACA--ATCCCACTTTTCAGGTGT--TGCAAGGA---TGGGCATTGTAGTCT-----
      **222222222*22222**22**22***22*2*2**2*222****222222**2*222222

```

Other   Simple Repeat   Low Complexity   DNA   LTR   LINE   SINE

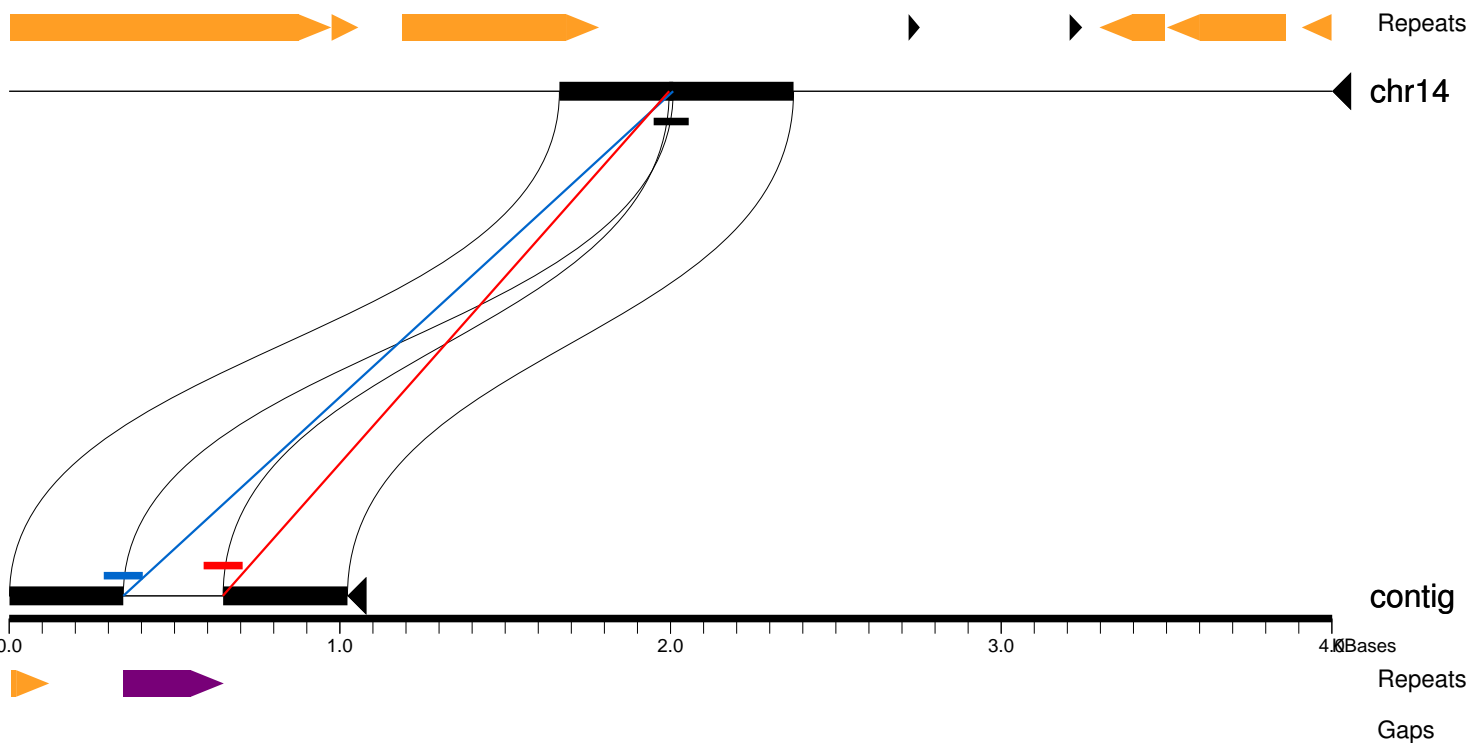





siteID: chr14\_44522310 Scaffitig1 + Breakpoint: chr14:44522303

chr14:44522254-44522362

Overlap Length: 11 INS size: 294 Genotyped: Yes

```
left  A--CCTGCTATGAATTGTTAAACTG-----TACCACTGAAGATTCAACAGAATTGT--GAGAATTTCTT
chrom A--CCTGCTATGAATTGTTAAACTG-----TACCACTGAAGATTCAACAGAATTGT--GAGAATTTCTT
right CCGCCCGCCTCGGCCTCCCAAAGTGTCTGGGATTACAGGCGTGAGCCACCGCGCCCGGCCGAGAATTTCTT
      111**1**111*111*111***1**111111*11**11111**11**1*111111*111*****
```

```
left  TTTTTTTTTTTTTGAGACGGAGTCTCGCTCTGTCGCCAGGCTGGAG-TGCAGTGGCGCA
chrom AAGTA-----AGATAGAATATGCAGGAGTCAA--ATGAAAAATATATAGTCATGCA
right AAGTA-----AGATAGAGTATGCAGGAGTCAA--ATGAAAAATATATAGTCATGCA
      222*2222222222***22**N*2*222222***2222*2*2222*22*22***222**
```

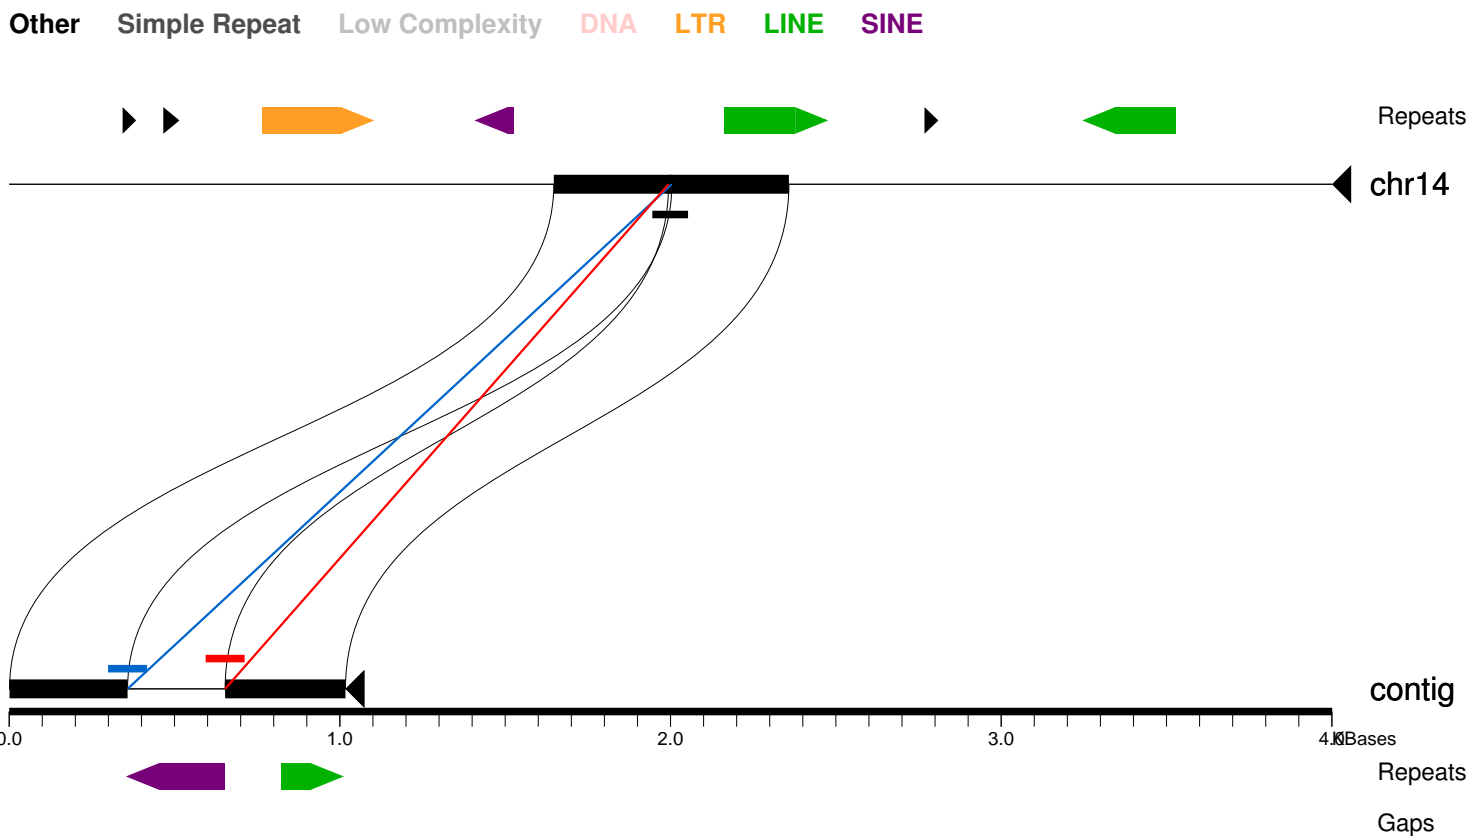

siteID: chr14\_47435982 Scaffitg1 + Breakpoint: chr14:47435959

chr14:47435913-47436018

Overlap Length: 14 INS size: 307 Genotyped: Yes

```

left  TTG-----TAATAAAGTCATTAAGTAACAAGTGC---CCAAGATTAATGATTTTAGCATTTTC
chrom TTG-----TAATAAAGTCATTAAGTAACAAGTGC---CCAAGATTAATGATTTTAGCATTTTC
right CCGCCCGCCTCGGCCTCCCAAAGTGCTGGGATTACAGGCGTGAGCCACCGCGCCCGGCC--AGCATTTTC
      11*11111111111111*111*****11*1111*1***1*1*1111***111111111*11111*****
  
```

```

left  TTTTTTTTTTTTTTTTTTTTTTTTTTTTTTTTTTGAGACGGAGTCTCGCTCTGTGCGCCAGGC--TGGA
chrom TTTTGTATCTACTGGCTC-----AAGATGTCCAGCAAGGTTTCTAAATACTTAGT
right TTTTGTATCTACTGGCTC-----AAGATGTCCAGCAAGGTTTCTAAATACTTAGT
      ***2*2*2*22*222*222222222222222*2*22***22**22*22*22*22222*2*2
  
```

Other Simple Repeat Low Complexity DNA LTR LINE SINE

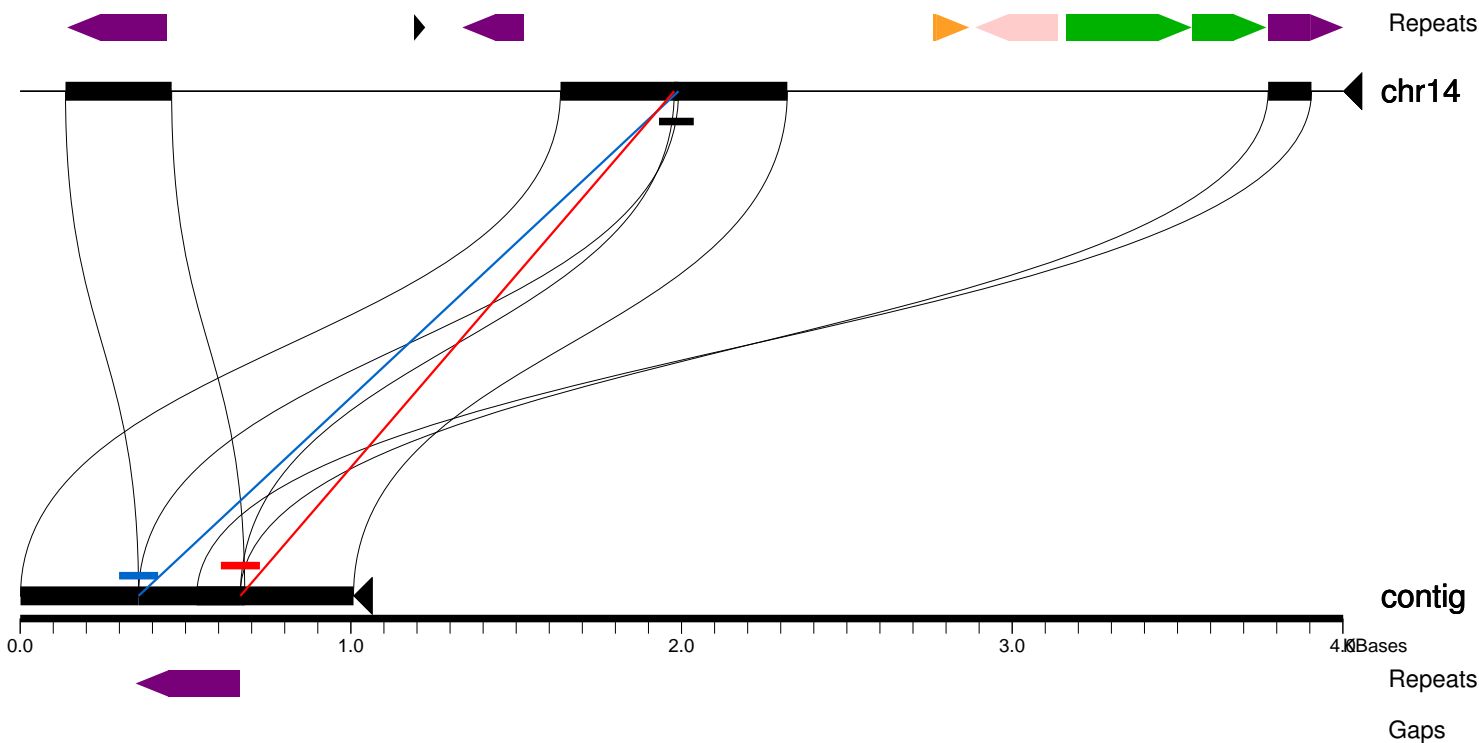





siteID: chr14\_51432080 Scafftig4 - Breakpoint: chr14:51432080

chr14:51432035-51432139

Overlap Length: 15 INS size: 326 Genotyped: Yes

```
left  CTAAGAGG--TAGA---CCCA-----GGAT-ACAAGCAAAAACCAGACACCATCTTTCTGGAATTAAA
chrom CTAAGAGG--TAGA---CCCA-----GGAT-ACAAGCAAAAACCAGACACCATCTTTCTGGAATTAAA
right TCCACCCGCCTCGGCCTCCCAAAGTGCTGGGATTACAGGCCTGAGCCACCGCGCCCGGCCTGGAATTAAA
      111*111*11*1*1111****11111111****1**1**111*1*111*1*111*111*****
```

```
left  TCTTTTTTTTTTTTTTTTTTTTTTTTTTTTTTTTTTTTTTTTTTTTTTTTTTTGAGACGGAG-TCTCGCTCTGT
chrom TCTTGAGCAGTGAGACAATA-----AAATGAGGATGAGCTGGAGCTTTTGCGCC--
right TCTTGAGCAGTGAGACAATA-----AAATGAGGATGAGCTGGAGCTTTTGCGCC--
      ***222222*2222222*222222222222222222*22222****22****2*2*2**2*222
```

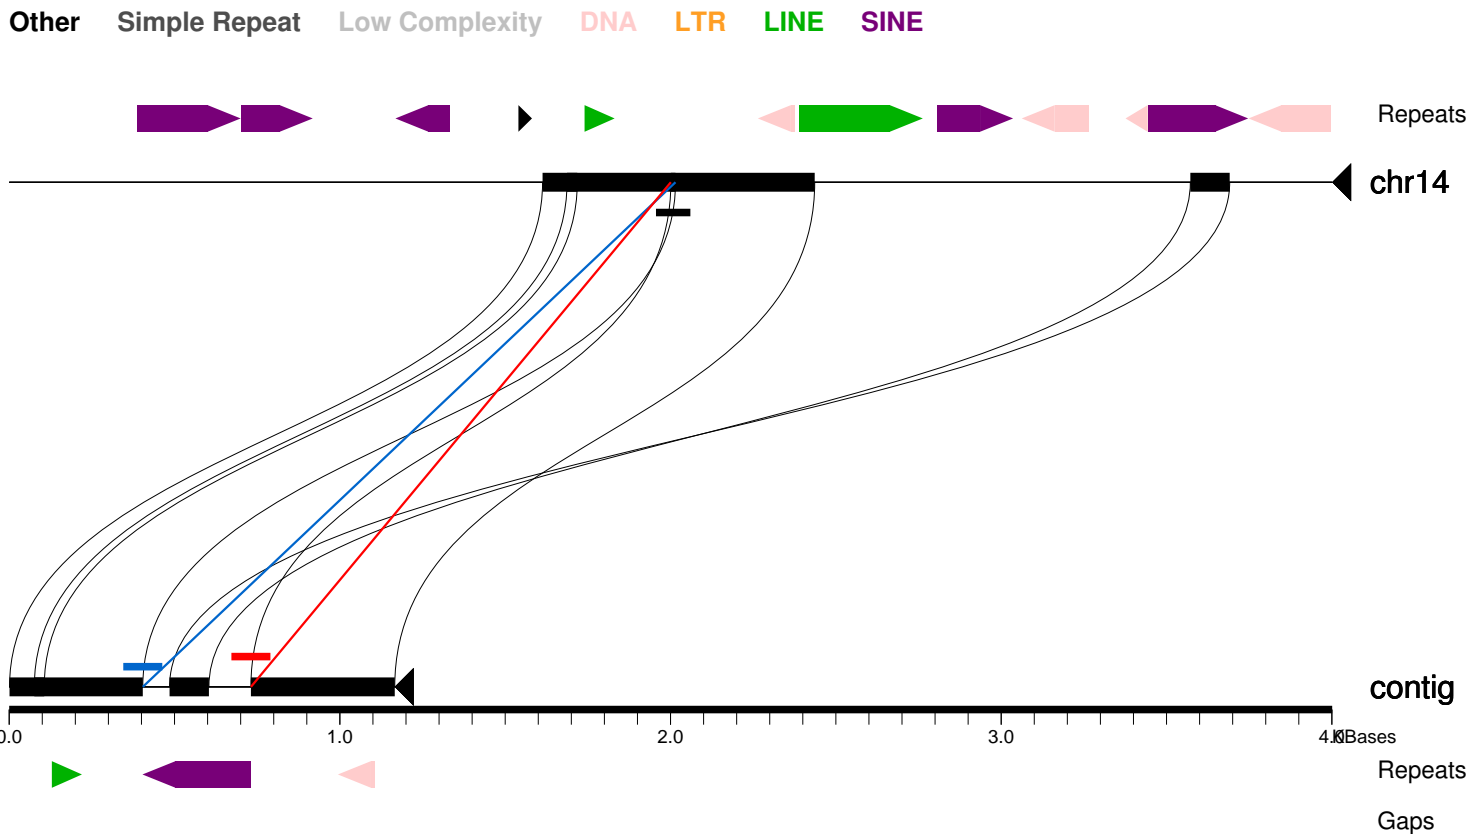

siteID: chr14\_51718983 Scaffoldig8 - Breakpoint: chr14:51718987

chr14:51718941-51719046

Overlap Length: 14 INS size: 297 Genotyped: Yes

```
left  -----ACTTAAGTTTTTCTGTC----CTCTATTATGA-TCCACAGTAAAAGTCACTAAAGAAATCTT
chrom -----ACTTAAGTTTTTCTGTC----CTCTATTATGA-TCCACAGTAAAAGTCACTAAAGAAATCTT
right GCCACTGCACCTCCAGCCTGGGCGACAGAGCGAGACTCCGTCTCAAAAAAAAAAAAAAAAAAAAGAAATCTT
      111111111***11*11*1111*1*1111*111*1*11*11**1*1*11***111*11*****
```

  

```
left  TC CGGCCGGGCGCGGTGGCTCACGCCTGT-AATCCCAGCACTTTGGGAGGCCGAGGCGGGCGG
chrom TCC-----CTTTAAATA---TCTGTTAATTTGGAGGGATTGAAAGGTATAA--AGTAAA
right TCC-----CTTTAAATA---TCTGTTAATTTGGAGGGATTGAAAGGTATAA--AGTAAA
      **222222222*22*222*22222****2***222222222***22***222*2222*2222
```

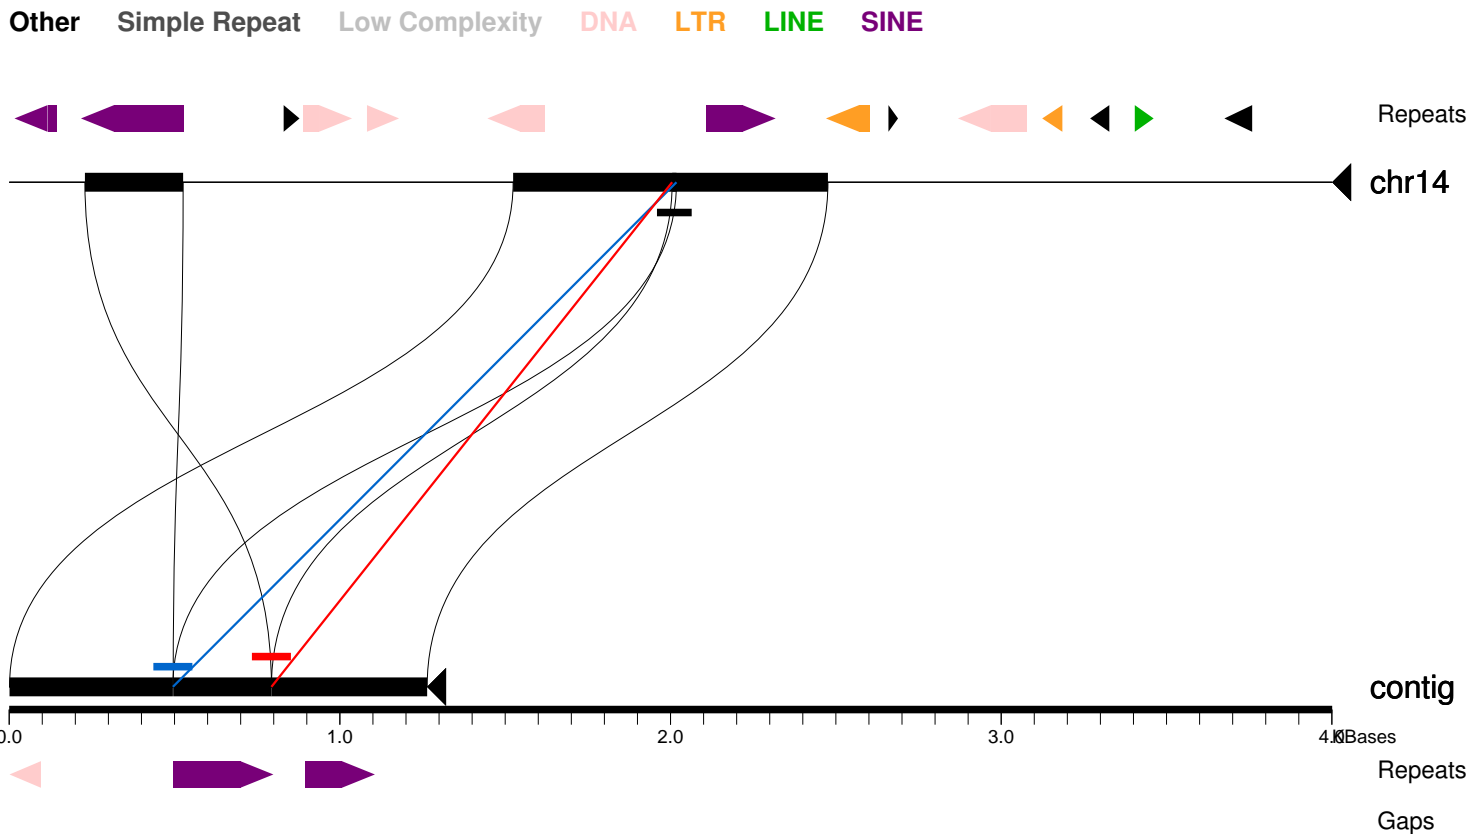















**siteID: chr14\_56430912 Scafftig4 + Breakpoint: chr14:56430899**  
**chr14:56430853-56430958**  
**Overlap Length: 14 INS size: 308 Genotyped: Yes**

```

left   CTTTTTCATGCTTGATAT-GC---AC-CTGGCCCAGGAGTCAGAGAAGCTG-----AAAAACGAT
chrom  CTTTTTCATGCTTGATAT-GC---AC-CTGGCCCAGGAGTCAGAGAAGCTG-----A AAAACGAT
right  CCAG--CCTGGGCGACAGAGCGAGACTCCGTCTCAAAAAAAAAAAAAAAAAAAAAAAAAA AAAACGAT
      *11111*1**111**1*11**111**1*1*1*1**11*111*1*1**111111111111111*****

```

```

left   CCAGCGGCCGGGCGCGGTGGCTCACGCCT-GTAATCCCAGCACTTTGGGAGGCCGAGGCGGGCGG
chrom  CCAGCAGGAGCTGGAGTCTGTGTGGGCCTTGTGTTGCACCACC-----GTCCGCC-----
right  CCAGCAGGAAGTGGAGTCTGTGTGGGCCTTGTGTTGCACCACC-----GTCCGCC-----
      *****2*221222*2*222*22222*****2**22*N2**2***2222222*2***2222222222

```

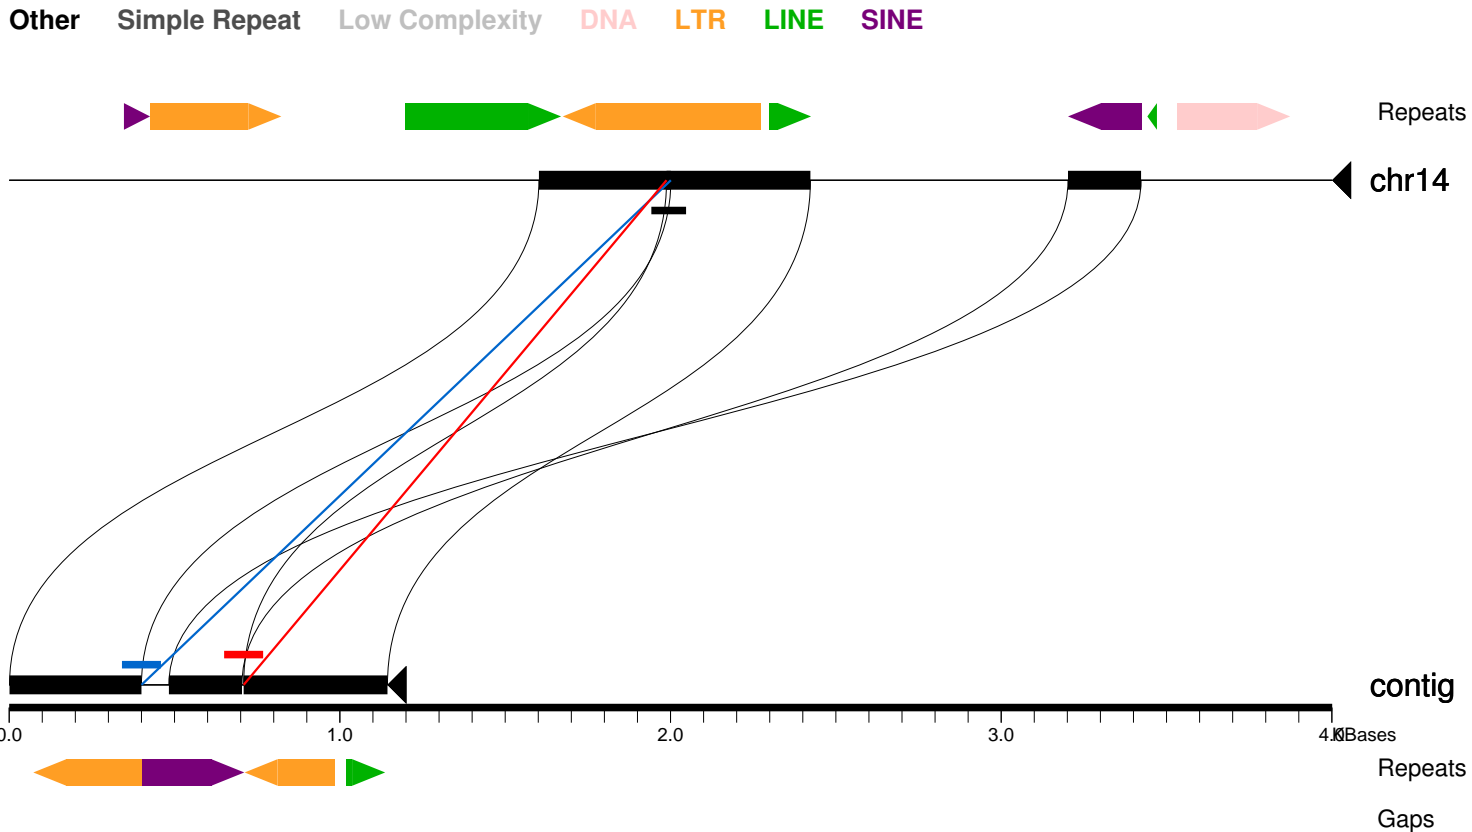

**siteID: chr14\_56437930 Scafftig3 + Breakpoint: chr14:56437912**  
**chr14:56437866-56437971**  
**Overlap Length: 14 INS size: 403 Genotyped: No**

```

left  -----TCTTCT-GATTA--AGACCCTGTGATTGCTCTTCATTTCCCTTCAA-----TAAAGTCCAAAT
chrom -----TCTTCT-GATTA--AGACCCTGTGATTGCTCTTCATTTCCCTTCAA-----TAAGTCCAAAT
right CGGGATGGTCTCGATCTCCTGACCTCGTGATCCGCCCGCCTCGGCCTCCCAAAGTGCTGAAGTCCAAAT
      11111*11***1***11111****11*****1111*11*1*111***1*1**11111*1*****
left  CTTTTNNNNNNNNNNNNNNNNNNNNNNNNNNNNNNNNNNNNNNNNNNNNNNNNNNNNNNNNNNNNNNNNNN
chrom CTT-----GAACAAAGCTTAAAAAGCCTTCATAATCCAACCTCTGCTTCCTTCT
right CTT-----GAACAAAGCTTAAAAAGCCTTCATAATCCAACCTCTGCTTCCTTCT
      ***222222222222222222222222222222222222222222222222222222222222222222
  
```

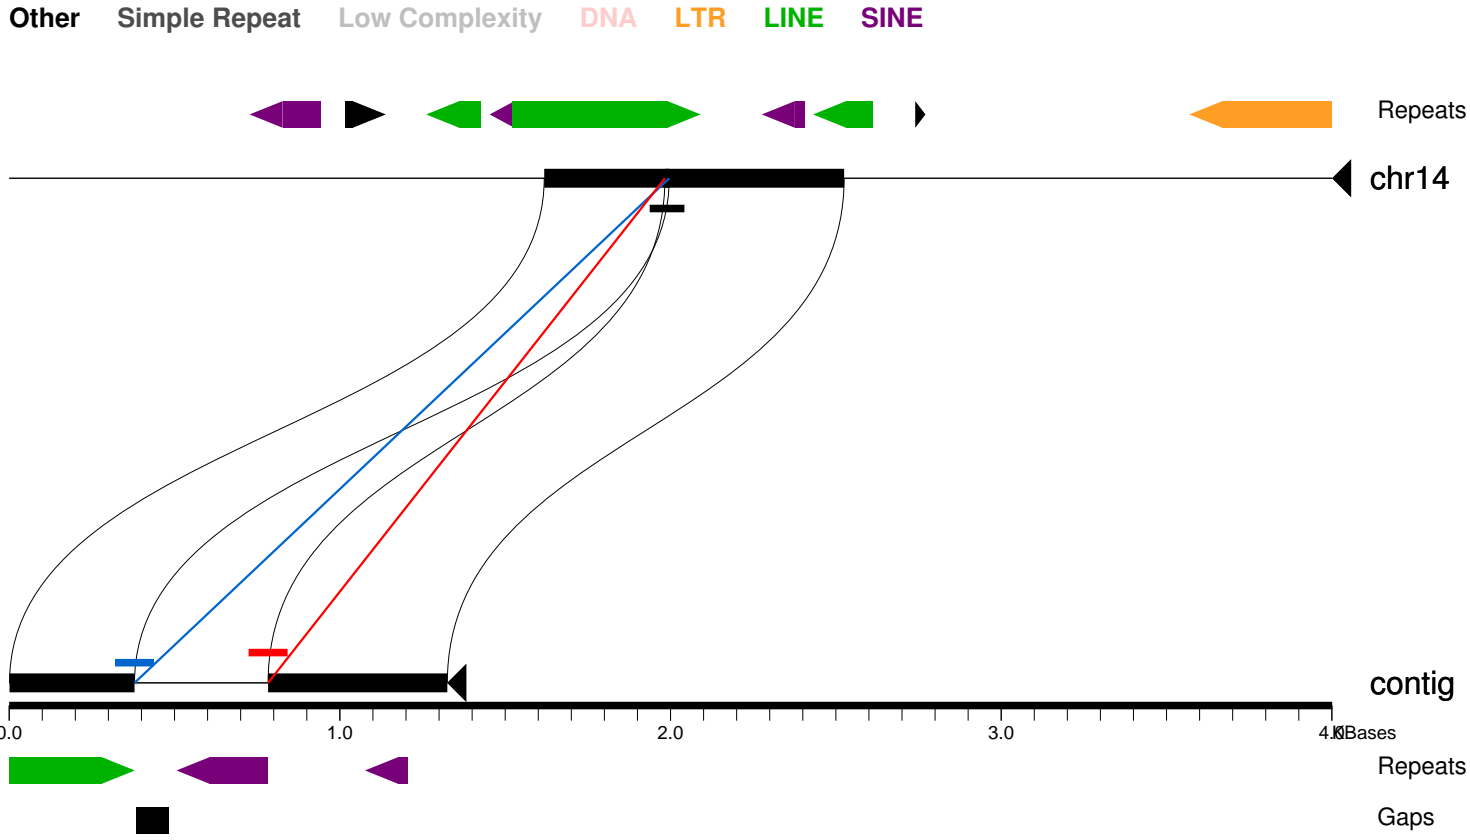

siteID: chr14\_56606687 Scafftig9 - Breakpoint: chr14:56606669

chr14:56606625-56606728

Overlap Length: 16 INS size: 312 Genotyped: Yes

```
left   ---TTAGTATTTGA---AGTTCGTC-----ATTTGTAGGGCAGCTCATTTGCTGTTAAAAATTTCTGG
chrom  ---TTAGTATTTGA---AGTTCGTC-----ATTTGTAGGGCAGCTCATTTGCTGTTAAAAATTTCTGG
right  GCCTGGGCGACAGCGAGACTCCGTCTCAAAAAAAAAAAAAAAAAAAAAAAAAAAAAAAAAAAAAAAATAATTTTCTGG
      111*11*11111*1111*1*1****111111111*11111*1111*1111*111111111***1*****
```

```
left   CTTTGGCCGGGCGCGGTGGCTCACGCCTGTAATCCCAGCACTTTGGGAGGCCGAGGCGGGCGG
chrom  CTTT---CTGGCT---TTCATCAGAAATG-AATG--ATTAATTT---ATTCTGAAAATGG---
right  TTTT---CTGGCT---TTCATCAGAAATG-AATG--ATTAATTT---ATTCTGAAAATGG---
      1***222*2***2222*222***2222*2***222*22*2***222*22*2***2222*222
```

Other Simple Repeat Low Complexity DNA LTR LINE SINE

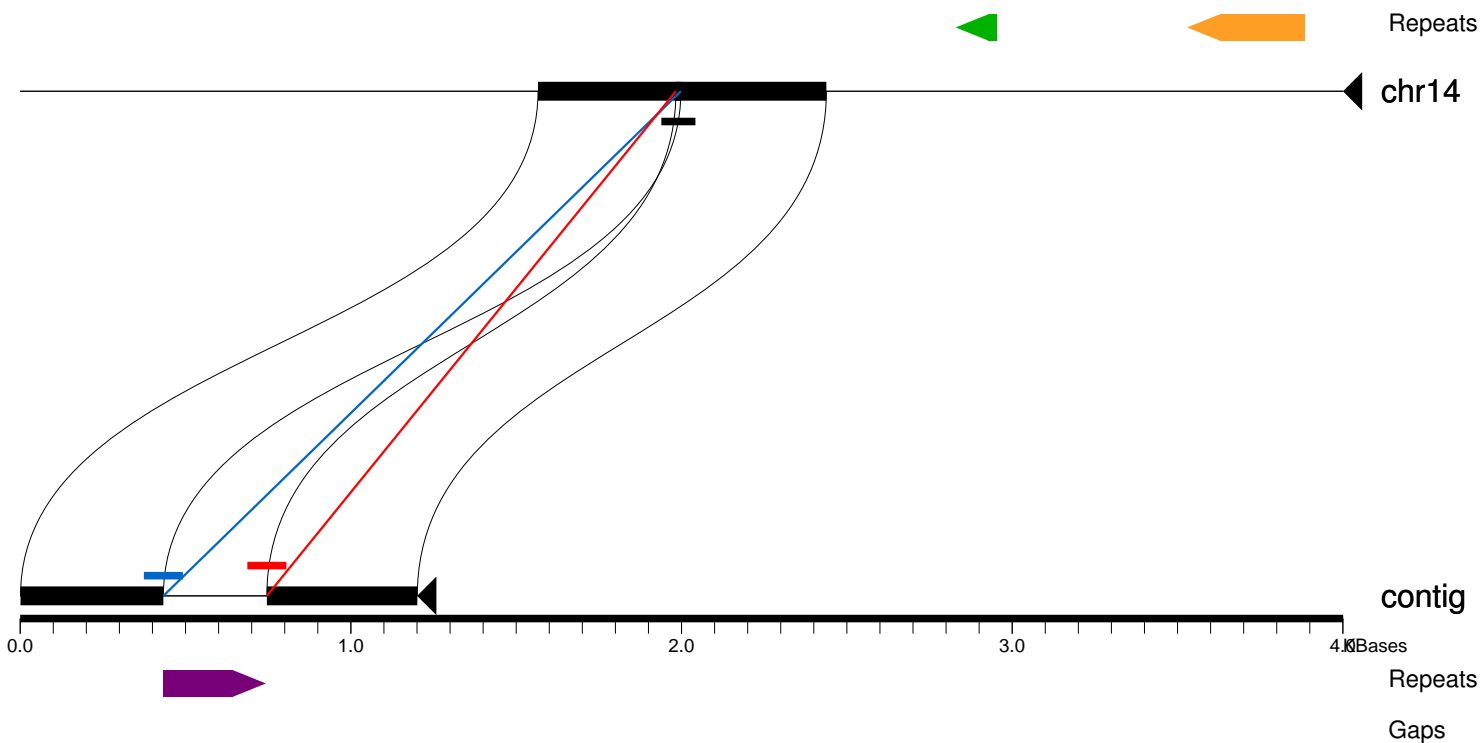

siteID: chr14\_57744449 Scafftig6 - Breakpoint: chr14:57744434

chr14:57744391-57744485

Overlap Length: 17 INS size: 257 Genotyped: Yes

```
left  ACAT---AATGAATTCC-----CACA-----CATGTCAAATAGTAGGTAAAAACATTAAAA
chrom ACAT---AATGAATTCC-----CACA-----CATGTCAAATAGTAGGTAAAAACATTAAAA
right TCCCGCCACTGCACTCCAGCCTGGGCGACAGAGCGAGACTCCGTCTCAAAAAAAAAAAAAAAAAAAAAA
1*111111*1**1*1***111111111111**1*1111111111*1*1*****1*11*111*****1*11****
```

```
left  -GTGAAACATTTCAAGGCCGAGGCGGGCGGATCACGAGGTCAAGAGATCGAGACCATCCCGGCTAAAAACGG
chrom -GTGAAACATTTCA-----CATTAGAAATTGAAAAACAAAAGTA---GGTTTATAATT-
right AGTGAAACATTTCA-----CATTAGAAATTGAAAAACAAAAGTA---GGTTTATAATT-
1*****2222222222222222**22**22222**2*2*2*2*22*2222*22**2**222
```

```
left  TGA
chrom ---
right ---
222
```

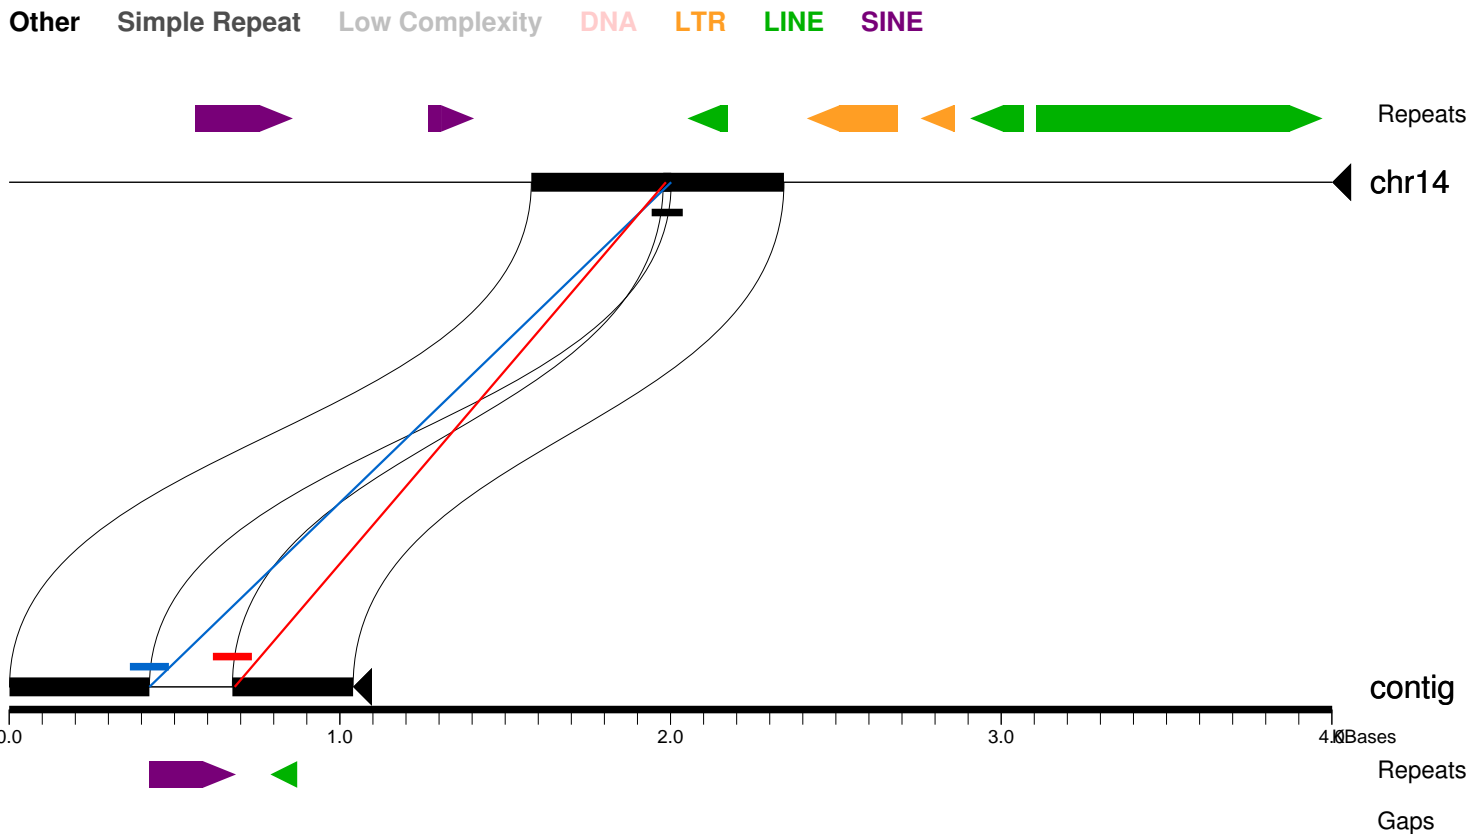

siteID: chr14\_60454173 Scafflig7 + Breakpoint: chr14:60454156

chr14:60453996-60454331

Overlap Length: 16 INS size: 312 Genotyped: Yes

```
left -----AAAAATGTAAC TGC GTTTC TT -TTGTTGCTTTTGGCAACCAGTTACATTATTTGTAA
chrom TTTGCCATTTTTAAAAAATGTAAC TGC GTTTC TT -TTGTTGCTTTTGGCAACCAGTTACATTATTTGTAA
right TTTAGTA-----GAGACGGGGTTTCACCTTGT-----AGCCAGG---ATGGTCTCGAT
222NNN2 111111*11**1*1*****111*****1111111111*1***1111**11*1*11*1
```

```
left CAACTTGTATCATTACAGAGGAAGTTTATATGCATTGTATAAAAAACAGAAAATGTAGGCCAACACAAA
chrom CAACTTGTGTTCATTACAGAGGAAGTTTATATGCATTGTATAAAAAACAGAAAATGTAGGCCAACACAAA
right CTCCT-GACCTCATGA-----TCCACCCGCCTCGGCCT----CCCAAAGTGCTGGG--ATTACAGG
*11**1*11N****1*1111111111*11*111**1*1*1111111111*11***1**11**111*11***11
```

```
left ACATTCACACCACCCAGAGATCAACCTTAACTTCTTTTFTTTTTTTTTTTTTTTTTTTTTTTTGA--GACG
chrom ACATTCACACCACCCAGAGATCAACCTTAACTTCTTTGTA CTCTGTCTTTTTAAATCTCTTTTAATTGATA
right CGTGAGCCACCGCGCCCGGC-CAACCTTAACTTCTTTGTA CTCTGTCTTTTTAAATCTCTTTTAATTGATA
11111111*****1*1*111*11*****1*2*22*2*2*2***222*2*2***2*22**22
```

```
left GAGTCTCGCTCTGTGCGCCAG-----GCCGACTGCGGAC-TGC-----AGTGGC--GC
chrom GATTTCCCTTCCATTTCCCATAGTTTATCTCTAGAAAATACTTGAGCCATTTCGACCCAAAAGAGTTTCCAGC
right GATTTCCCTTCCATTTCCCATAGTTTATCTCTAGAAAATACTTGAGCCATTTCGACCCAAAAGAGTTTCCAGC
**2*22*22**22*22***222222222222*2222***222*2*2*2*222222222***22*22**
```

```
left AATCTCGG-----CTCACTGCAAGCTCC-----GCCTCCCGGGTTCACGCC--
chrom AGCCTGGGATTTGCTTACTT-AAGATACATCGCTATATGCCTCCCATCTTCTATATTT
right AGCCTGGGATTTGCTTACTT-AAGATACATCGCTATATGCCTC-----
*22*2**22222*2**22***2*2*2222222222***11NNN111NNNN
```

Other Simple Repeat Low Complexity DNA LTR LINE SINE

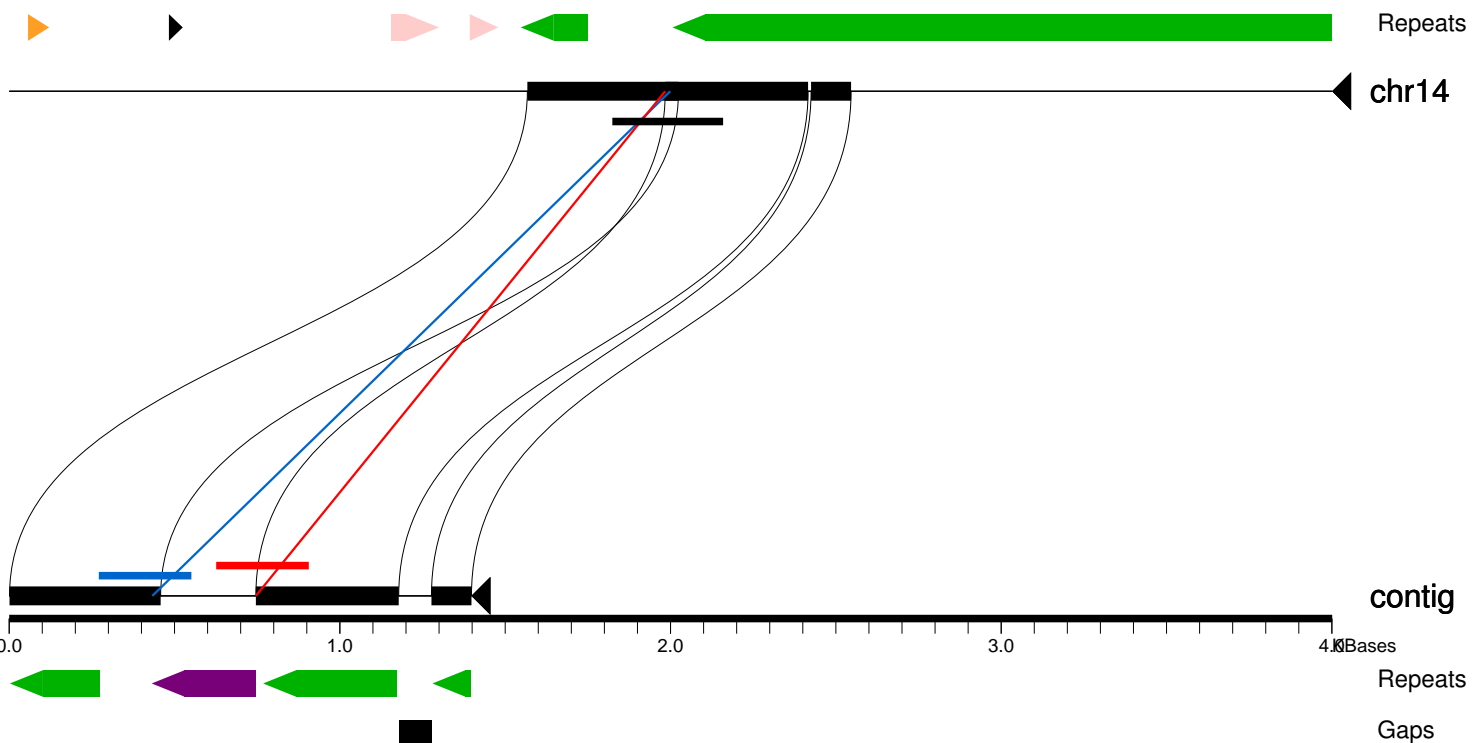

siteID: chr14\_60575466 Scafftig4 + Breakpoint: chr14:60575487

chr14:60575440-60575546

Overlap Length: 13 INS size: 302 Genotyped: Yes

```
left  -----ATACAAAATTTATTTCTAATTTTATGATAGCAACAATAGTAGAAGTAATATGATT
chrom -----ATACAAAATTTATTTCTAATTTTATGATAGCAACAATAGTAGAAGTAATATGATT
right CCGCCCGCCTCGGCCTCCCAAAGTGCTGGG--ATTACAGGCGTGAGCCACCGCGCCCGGCCATATGATT
      11111111111111111111*1*1***1*11*11111***11*1*111*111**1111111111*11*****
```

```
left  TTTTFFFFFFFFFFFFFFFFFFFFFFFFGAGACGGAGTC--TCGCTCTGTCGCCCAGGCTGGAGTGCA
chrom TTTTAAAAAACCAACTTGTACAGAAAGAAAAGTAGAAAATAGTTTTTTTAAAC-----
right TTTTAAAAAACCAACTTGTACAGAAAGAAAAGTAGAAAATAGTTTTTTTAAAC-----
      ***2222222222**2**222222**2*2*2**2222*2*2*2*222*222222222222222
```

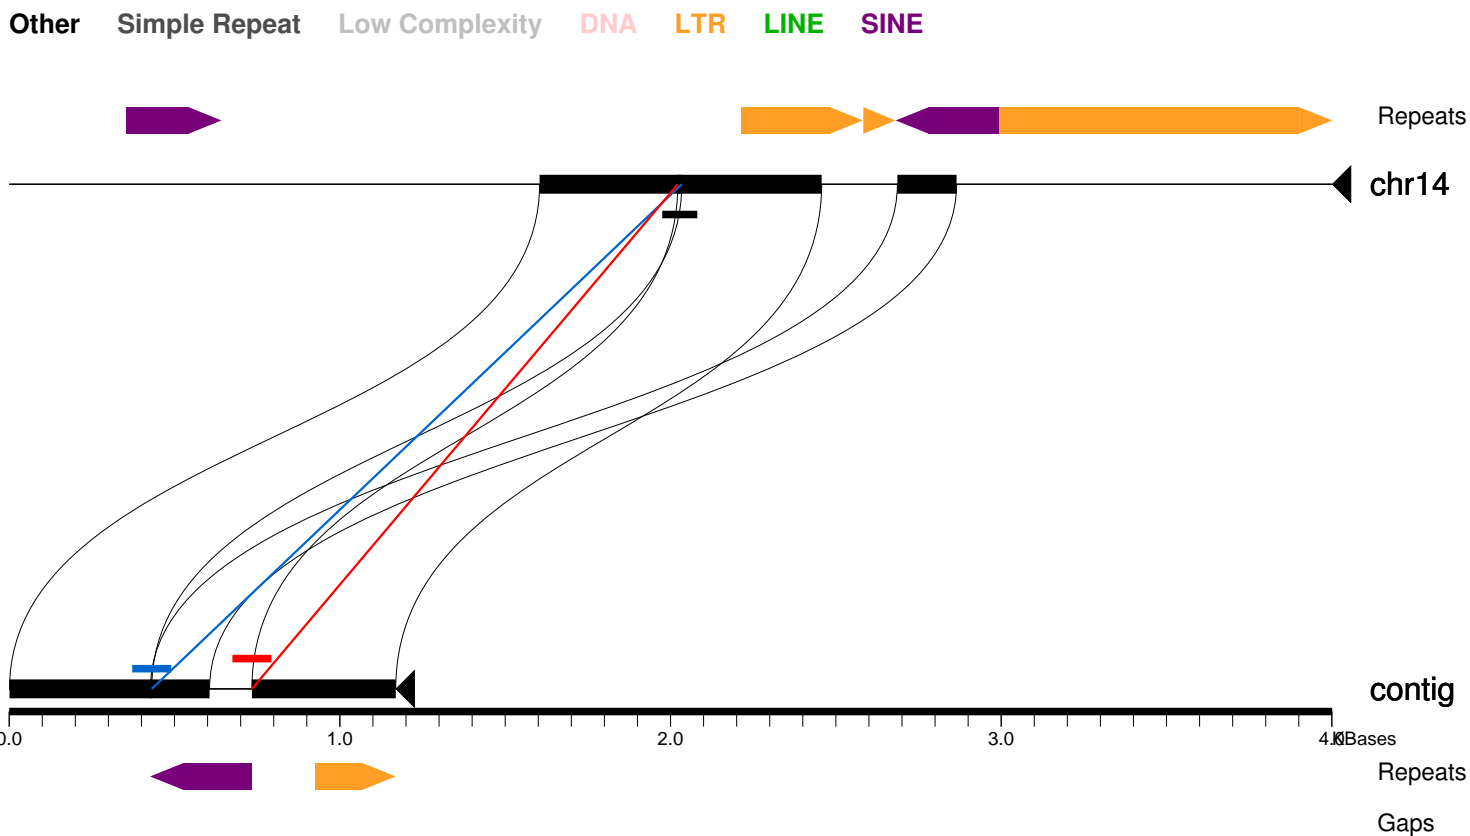

siteID: chr14\_60741397 Scafftig12 - Breakpoint: chr14:60741385

chr14:60741341-60741444

Overlap Length: 16 INS size: 310 Genotyped: Yes

```
left   TTACAGCAGAAAAGTAGGAGGAGAGGGTT-----ATGAAAGAATTCATTGAAATGGTTCA
chrom  TTACAGCAGAAAAGTAGGAGGGGAGGGTT-----ATGAAAGAATTCATTGAAATGGTTCA
right  AGCCTGGGCCACAGAGCGAGACTCCGTCTCAAAAAAAAAAAAAAAAAAAAAAAAAAAAAAGAAATGGTTCA
      111*1*1111*1**111***1N111*11*1111111111111111*11***1**111*11*****
```

```
left   CTCATGGCCGGGCGCGGTGGCTCACGCTTGTAAATCCCAGCACTTTGGGAGGCCGAGGCGGGCGG
chrom  CTCATTTATTGATCTTTTTTTTC-----TGTAGTATC--CAATCTGCCATTCATTG-----
right  CTCATTTATTGATCTTTTTTTTC-----TGTAGTATC--CAATCTGCCATTCATTG-----
      ***2*2222*222222*222**22222***2*22*22**2*2**22*22*222*22222222
```

Other Simple Repeat Low Complexity DNA LTR LINE SINE

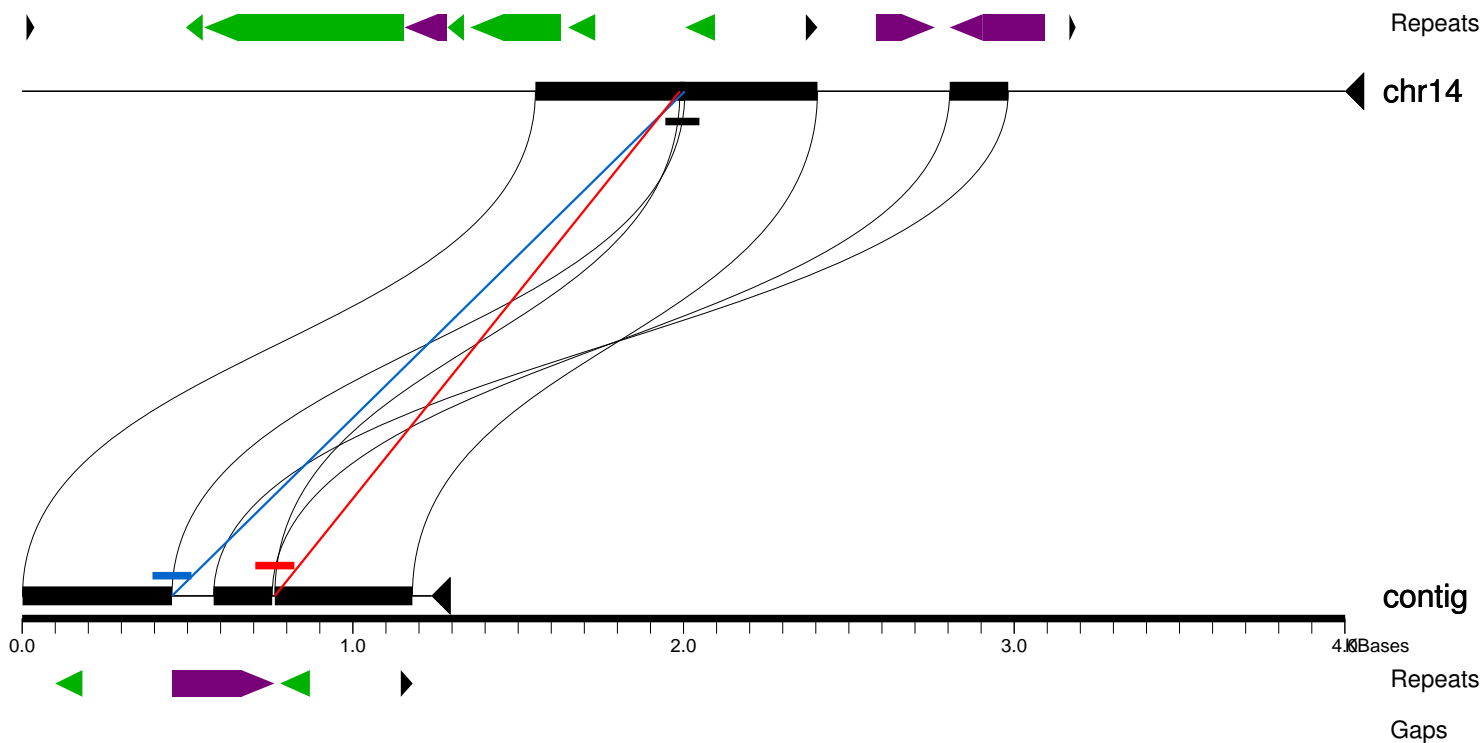





siteID: chr14\_66934443 Scaffitig6 - Breakpoint: chr14:66934447

chr14:66934402-66934506

Overlap Length: 15 INS size: 299 Genotyped: Yes

```
left  AA-----GCTGTTTAGC-----TGACA----ACTGCCTAGAGTCGTGAAACAGGTTATCAAGAATCTGAA
chrom AA-----GCTGTTTAGC-----TGACA----ACTGCCTAGAGTCGTGAAACAGGTTATCAAGAATCTGAA
right CGCCACTGCACTCCAGCCTGGGTGACAGAGCAAGACTCCGTCTCAAAAAAAAAAAAAAAAAAAAGAATCTGAA
      11111111**11*11***11111*****1111*111*111*11**111***1*1111*11*****
```

  

```
left  AGTC-AGGCCGGGCGCGGTGGCTCACGCCTGTAATCCCAGCACTTTGGGAGGCCGAGGCGGGCG
chrom AGTC-AGGCCGGGCGCGGTGGCTCACGCCTGTAATCCCAGCACTTTGGGAGGCCGAGGCGGGCG
right AGTC-AGGCCGGGCGCGGTGGCTCACGCCTGTAATCCCAGCACTTTGGGAGGCCGAGGCGGGCG
      ***2*2*2222*2222222*222*2222*2***2222*2*2**22*22222222*2*222222
```

Other Simple Repeat Low Complexity DNA LTR LINE SINE

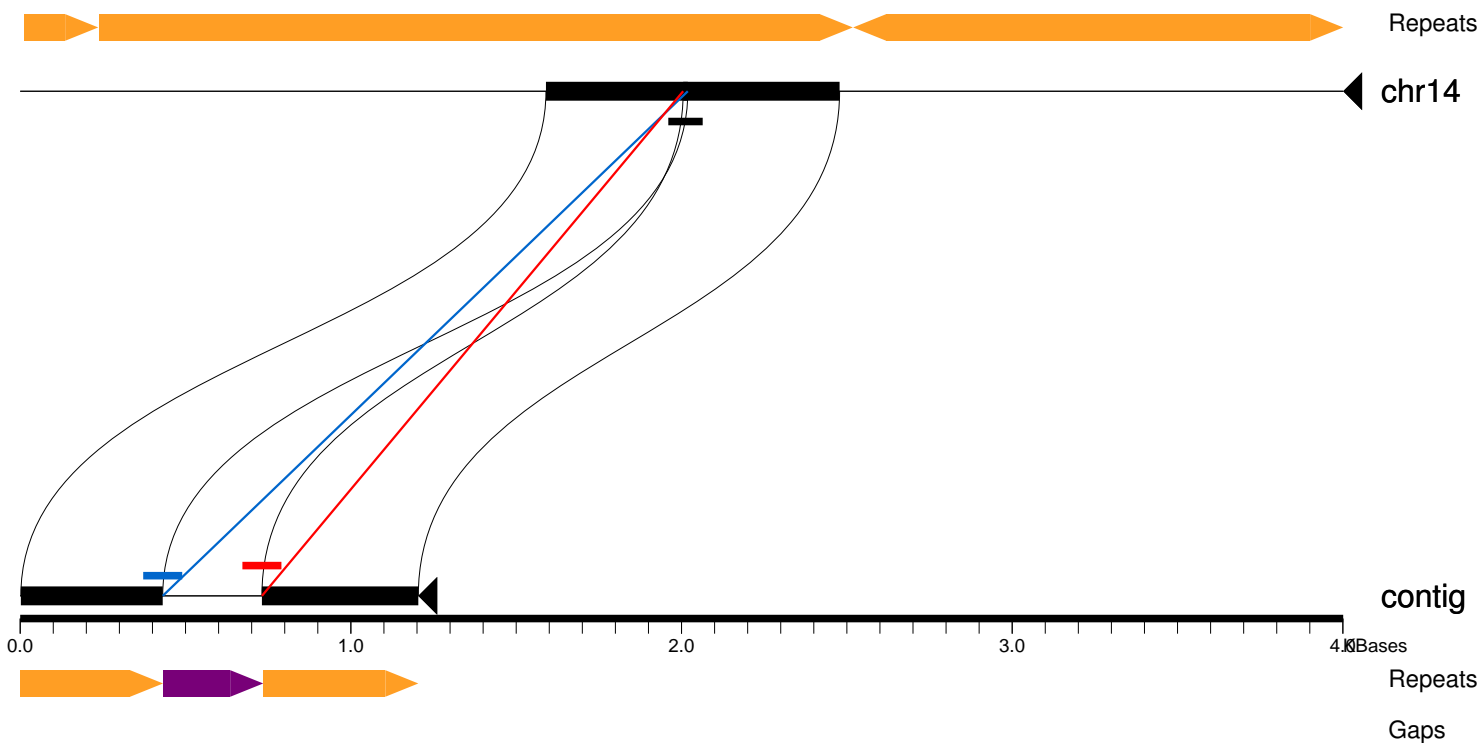

**siteID: chr14\_71480274 Scaffig2 - Breakpoint: chr14:71480268**  
**chr14:71480225-71480327**  
**Overlap Length: 17 INS size: 433 Genotyped: No**

```

left  AATA-----TGATGCAAAGTTCTAT-ATAACAGTTATAAGA-----GGAAACTTCTGTTTCCCTG
chrom AATA-----TGATGCAAAGTTCTAT-ATAACAGTTATAAGA-----GGAAACTTCTGTTTCCCTG
right TCCACCCCGCTCGGCTCCCAAAGTGCTGGGATTACAGGCGTGAGCCACCGCGCCCGGCTGTTTCCCTG
      111*11111111111111111111*****1**111**1****111*1**1111111*111111******
    
```

```

left  GTTCTTTTNTNNNNNNNNNNNNNNNNNNNNNNNNNNNNNNNNNNNNNNNNNNNNNNNNNNNNNNNNNNNNNNNNNN
chrom GTTCTT-----AACACTACTCTCTTAATGGCAAACACAAACTTGGTGACCAACA
right GTTCTT-----AACACTACTCTCTTAATGGCAAACACAAACTTGGTGACCAACA
      *****22222222222222222222222222222222222222222222222222222222222222222222
    
```

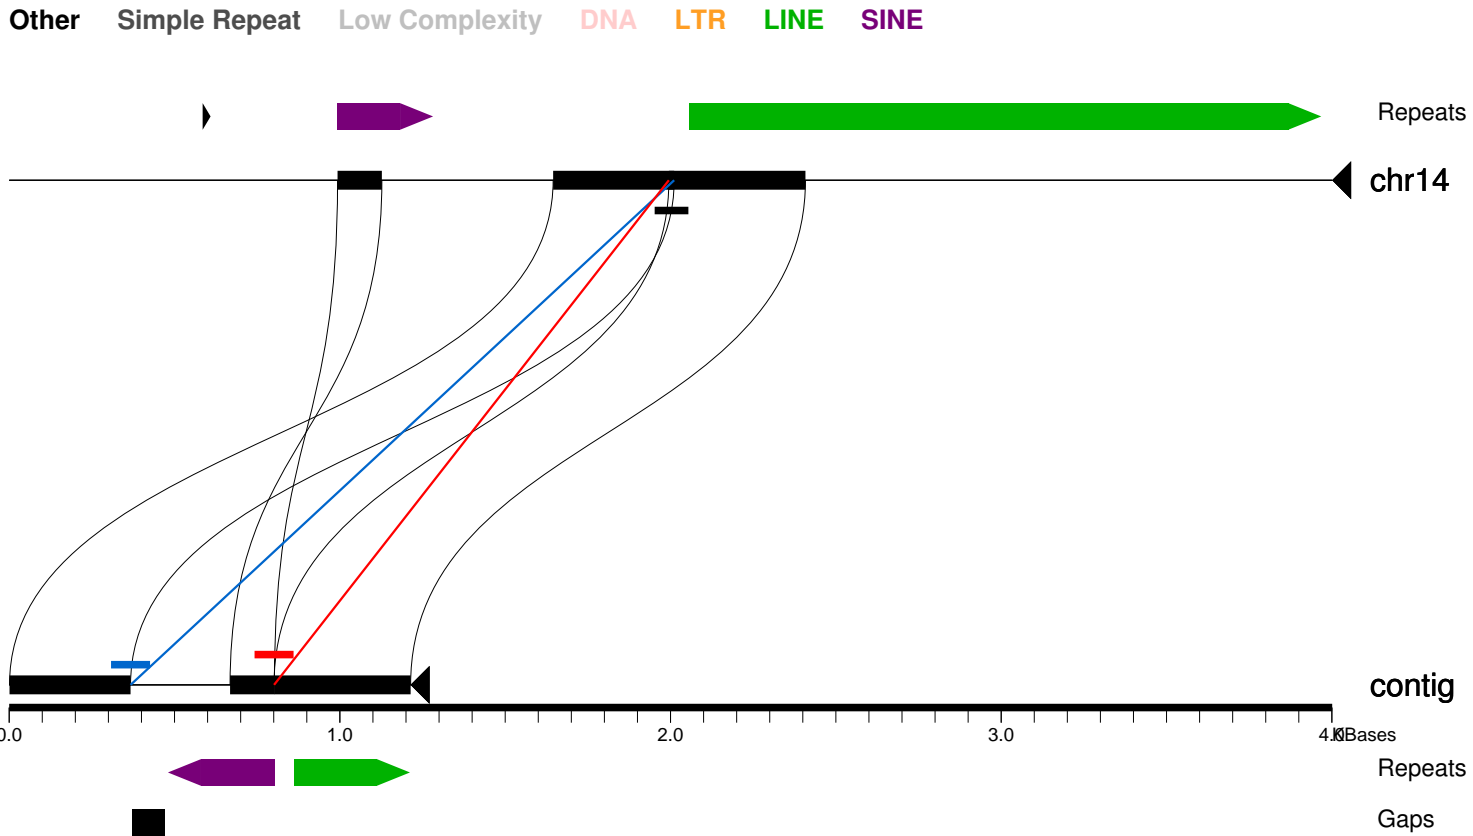

siteID: chr14\_74942135 Scafftig4 + Breakpoint: chr14:74942145

chr14:74942099-74942204

Overlap Length: 14 INS size: 306 Genotyped: Yes

```
left  AGTCAAGCAGCTGG-----AAAAAGTTGG-----AGG--TGAGATATAAACCCAGCTTGTATTTAACAT
chrom AGTCAAGCAGCTGG-----AAAAAGTTGG-----AGG--TGAGATATAAACCCAGCTTGTATTTAACAT
right CCGCCCGCCTCGGCCTCCCAAAGTGCTGGGATTACAGGCGTGAGCCACCGCGCCCGCCGTATTTAACAT
      111*11*11*1*111111***11*1***111111***11***11*11111*1*111*****
```

```
left  TTTTTTTTTTTTTTTTTTTTTTTTTTTTTGAGACGGAGTCTCGCTCTGTCGCCAGGCTGGAG
chrom TTTAAATGTTACAGAAATCTGT-----AAACA-ACTA-----CTGCTTCCAAAAGTGAAA
right TTTAAATGTTACAGAAATCTGT-----AAACA-ACTA-----CTGCTTCCAAAAGTGAAA
      **222*2**222222*2*2*222222*2**22*2*222222***222**2*222**2*2
```

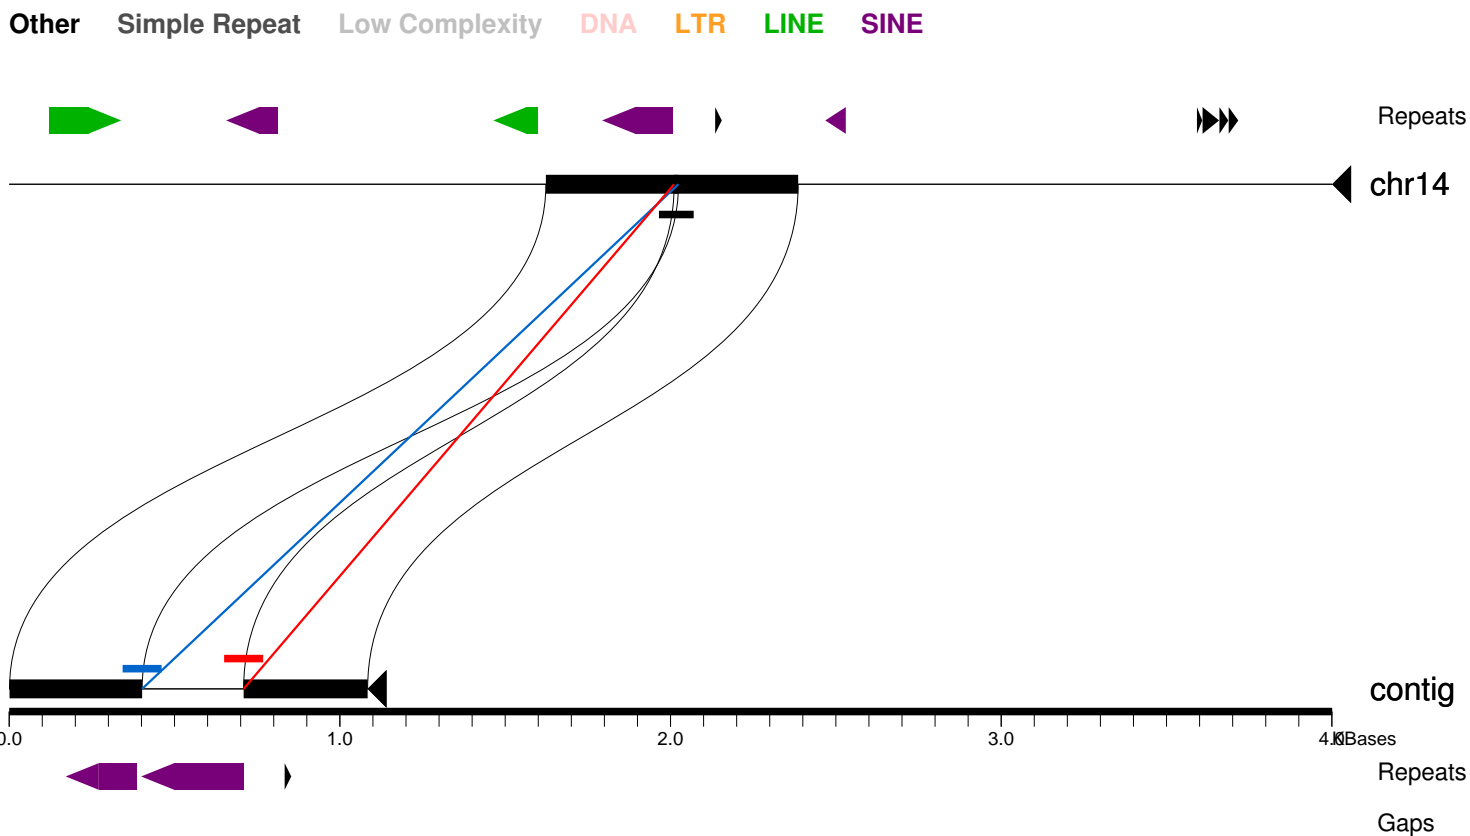

siteID: chr14\_75499560 Scafftig7 - Breakpoint: chr14:75499568

chr14:75499408-75499737

Overlap Length: 10 INS size: 315 Genotyped: Yes

```
left -----CACTCCTTAGGTCCTTGCCTAACTCTTTGACATTACTCATTTGGCCACAGGAGTAAAGACT
chrom GTCCATGAAGCACTCCTTAGGTCCTTGCCTAACTCTTTGACATTACTCATTTGGCCACAGGAGTAAAGACT
right TTTAGTAGAG-----ACGGGGTTTC---ACCGTTTTA-----GCCGGGATGGTCTCGA-T
      N2NNN2NN2211111111111*1*111**1*111**11***1*1111111111111***111111**111**1*
```

```
left TTCCTGGTATTTTACCACCTTGGTGAACACACTGCCTCATGATGAGGAAAAGGGTAGCAAAAAAACATT
chrom TTCCTGGTATTTTACCACCTTGGTGAACACACTGCCTCATGATGAGGAAAAGGGTAGCAAAAAAACATT
right CTCTG-----ACCTCGTGATCCACCCGCTCGGCCTCCC--AAAGTGCTGGGATTACAGGCGTG
      1*****1111111111111**1*1*****1*111*1*****11111*111111**1*11*11*11*1*11*1*1
```

```
left TAAAAAGCATATATTGCTTTGGAAAGATAGTTTTTTTTTTTTTTTTTTTTTTTTTTTTTTTGGAGACGG
chrom TAAAAAGCATATATTGCTTTGAAAAGATAGATTTAAAAAACCAGAGATATTGGTTGTCTCTGGGGAGAGAA
right -AGCCACCGCGCCCGCCT-GAAAAGATAGATTTAAAAAACCAGAGATATTGGTTGTCTCTGGGGAGAGAA
      1*111*1*1111111111**1*1*****2***22222222222*2*22**2*2*2*222***222
```

```
left AGTCTC-GCTCTGTCGCCAGGCTGGAGTGCAG-----TGCG-----GG
chrom ACTAGGAGGGGTGGGGACAAGGATAGAAAGGAGACTTTATTATATTCCCTTTTGTGCCTTTCAGAATTGG
right ACTAGGAGGGGTGGGGACAAGGATAGAAAGGAGACTTTATTATATTCCCTTTTGTGCCTTTCAGAATTGG
      *2*2222*222**2*2*2***2*2**22*2*22222222222222222*2*2*22222222222**
```

```
left ATCTCG--GCTCA--CTGCAAGCTCC---GCCTCCCGGTTTCATGCCAT--
chrom ATCTATTTGATTATACTGCATATTCAAAAAGCAAACATAAATTT-TAAAAATCA
right ATCTATTTGATTATACTGCATATTCAAAAAGCAAACATAA-----
      ***2222*2*2*22*****222*2222**222*222211N21NNN11
```

Other Simple Repeat Low Complexity DNA LTR LINE SINE

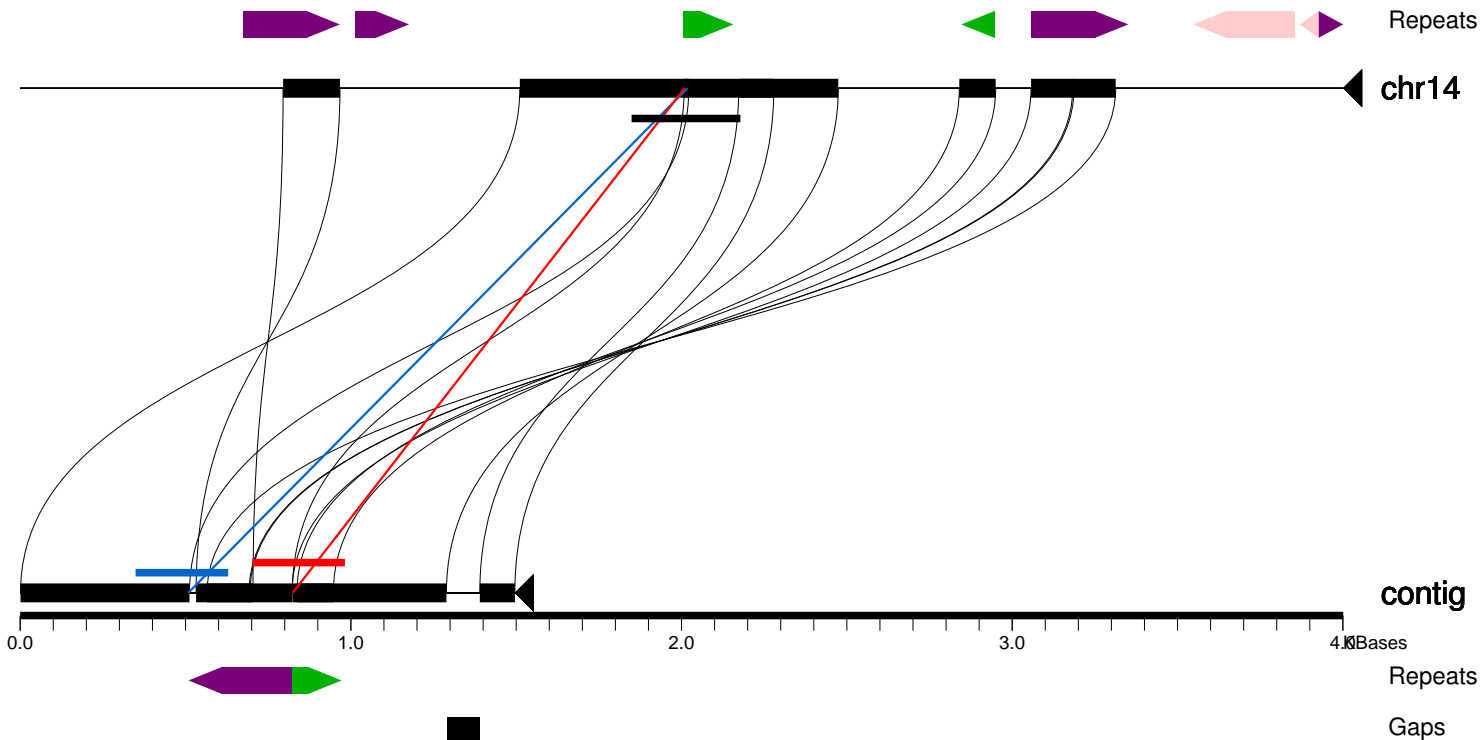

siteID: chr14\_77116242 Scafftig4 + Breakpoint: chr14:77116229

chr14:77116184-77116288

Overlap Length: 15 INS size: 302 Genotyped: Yes

```
left CT-----TATTTTTATGATCTAACTGTATTTCCAAAAGATGATTCTAATC-----CCTGCTGTGT
chrom CT-----TATTTTTATGATCTAACTGTATTTCCAAAAGATGATTCTAATC-----CCTGCTGTGT
right ATCCACCCGCCTCGGCCTCCCAAAGTGTCTGGGATTACAGGCG-TGAGCCACCGCGCCCGG-CCTGCTGTGT
1*1111111111*11111*111*11111***111*1**111*1***11*1111*111111*111111*****
```

```
left TTCTTTTTTTTTTTTT---TTTGGAGACGGAGTCTCGCTCTGTTCGCCAGGCCGGACTGCGGACTG
chrom TTCTTAATAGTTCTGTGGCCTTATCAGCCAAATCCTTGATTTT-----CCTGAGT-----
right TTCTTAATAGTTCTGTGGCCTTATCAGCCAAATCCTTGATTTT-----CCTGAGT-----
****22*22**2*2*2222**2*2**2*22*22**2*2*2*2222222222**2**2*22222222
```

Other Simple Repeat Low Complexity DNA LTR LINE SINE

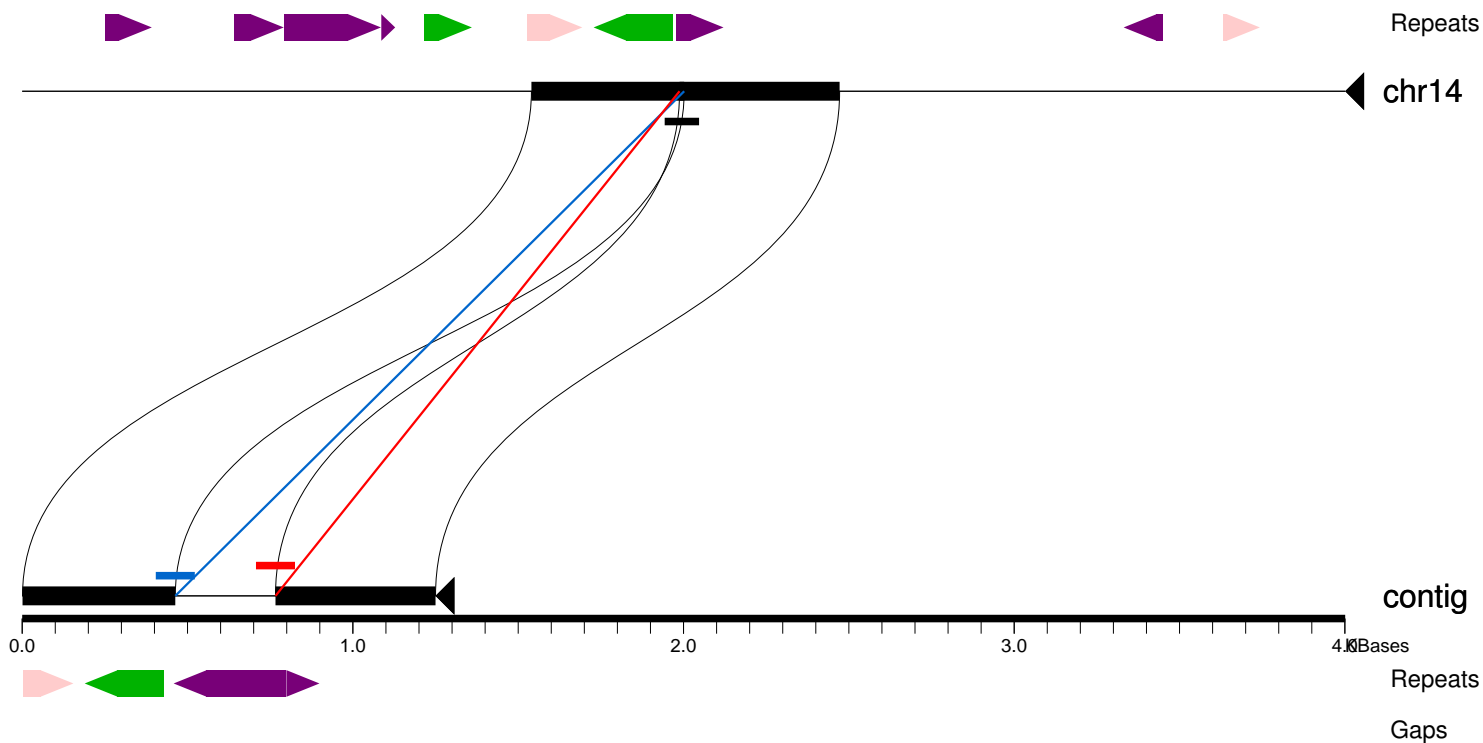



siteID: chr14\_86630692 Scafftig2 - Breakpoint: chr14:86630694

chr14:86630643-86630748

Overlap Length: 9 INS size: 297 Genotyped: Yes

```
left  TGAAAACA----ACTCTGCTCAGGTGGAATGACAGA-----TGTC AAGAGCTTACAAAAA--ACTACC
chrom TGAAAACA----ACTCTGCTCAGGTGGAATGACAGA-----TGTC AAGAGCTTACAAAAA--ACTACC
right TCGCGCCACTGC ACTCCAGCCTGGGCAACAGAGCGAGACTCCATCTCAAAAAAAAAAAAAAAAAAAAAAAACTACC
      *11111*11111***1111*1**111*11**11**1111111*1****1*1111*1*****11*****
```

```
left  TTGCCGGGCGCGGTGGCTCACGCCTGTAATCCCAGCACTTTGGGAGGCCGAGGCGGGCGGAT
chrom TTGCCCTGTTTAAAGG---ACATAAAGAAAACCAGCATCTTAAGCTGCAGTG-----
right TTGGCCTGTTTAAAGG---ACATAAAGAAAACCAGCATCTTAAGCTGCAGTG-----
      **2*22*222222**222**222222**22*****22**22*22**2*2*2222222222
```

Other Simple Repeat Low Complexity DNA LTR LINE SINE

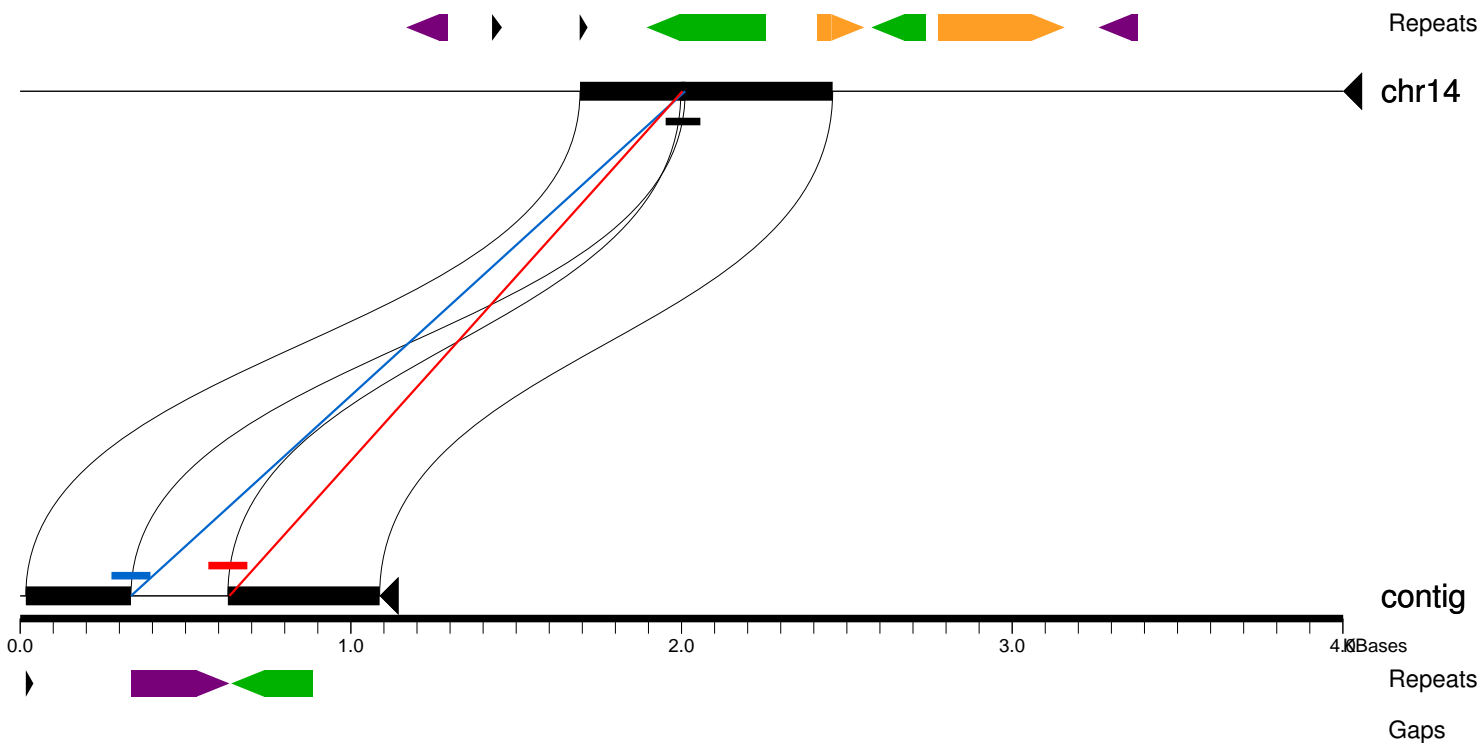

**siteID: chr14\_87375554 Scafftig1 - Breakpoint: chr14:87375554**

**chr14:87375508-87375613**

**Overlap Length: 14 INS size: 445 Genotyped: No**

```

left   ACTCACACACAGAGAACACCACCAGAAACTGAGTGGGAGAAGGCTT-----GAAATGTTATC
chrom  ACTCACACACAGAGAACACCACCAGAAACTGAGTGGGAGAAGGCTT-----GAAATGTTATC
right  NNNNNNNNNNNNNNNNNNNNNNNNNNNNNNNNNNNNNNNNNNNNNNNNNNNNNNNNNNNAAAAAAGAAATGTTATC
       11111111111111111111111111111111111111111111111111111111111111111111*****

left   CAAGGCCGGGCGCGTGGCTCAC-GCCTGTAATCCCAGCACTTTGGGAGGCCGAGGCGGGCGGA
chrom  CA AACAGT-----TTTCTGAGAGACTATAAGAT-ATCACAT-----GGCAGAAAATTAT---
right  CAAAACAGT-----TTTCTGAGAGACTATAAGAT-ATCACAT-----GGCAGAAAATTAT---
       ***22*2*222222*22**2*22*2**2***2222*2***2*22222***2**2222222222
  
```

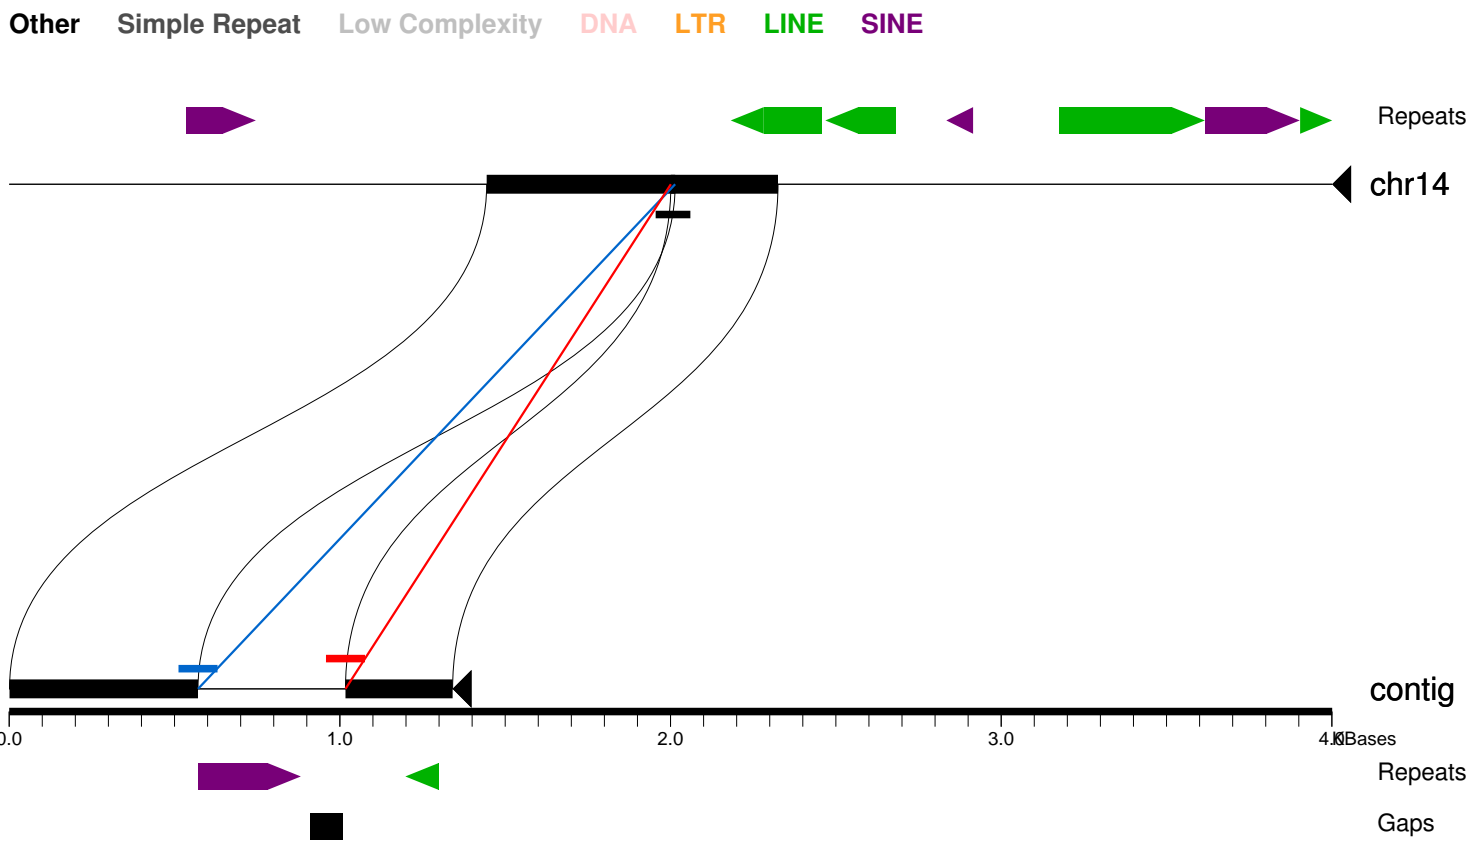







siteID: chr14\_95024636 Scafftig2 - Breakpoint: chr14:95024606

chr14:95024446-95024781

Overlap Length: 16 INS size: 294 Genotyped: Yes

```
left  A-----TTTCTTACAAGACTGGAAGGAAACAAATTATATCTAGTCATAAGCTGAACACCAGGTT
chrom AGCACATACCCATTTTCTTACAAGACTGGAAGGAAACCAATTATATCTAGTCATAAGCTGAACACCAGGTT
right -----TTTAGTAGA-GACGGGGTTTCACCG--TTTTAGCCGG-----GATGGTCTCGA--TC
1          ***11**1*1***1**11111*1*N11**1**1*11*111111*1**11*1*1*11*1
```

```
left  TGCAAATGATTTTATTTTCTTCTCCAGGTTTTTTTTTACTTTTCCCATATTTTTCATGATGACCATTATTGC
chrom TGCAAATGATTTTATTTTCTTCTCCAGGTTTTTTTTTACTTTTCCCATATTTTTCATGATGACCATTATTGC
right TCC---TGACCTCGTGATC--CGCCCGCCTCGGCCT-----CCCAAAGTGCTGG-GATTACAG-----GC
*1*111***11*11*11**11*1**1*11*11111*11111***1*1*11*111***1**1111111**
```

```
left  ATTGCCAATCAAATTCAAAAACAAGGACAGCCTTTTTTTTTT-----TTTTTTTTTTGAGA-----GGAGT
chrom ATTGCCAATCAAATTCAAAAACAAGGACAGCCTTTTTTAAAGGGCAGATTAATTTCTGGCTCCATTTGGAAT
right GTGAGCCACCGCGCCCGGCCAAGGACAGCCTTTTTTAAAGGGCAGATTAATTTCTGGCTCCATTTGGAAT
1*111*1*1*11111*1111******22222222*22**22*22222222***2*
```

```
left  CTCGCTCTGTGCGCCAGGCTGGAGTGCAGTG-GCGGGATCTCGGC-TCACTGCAAGCTCCGCTCCCGGG
chrom CCAGGGAATGGGAAGGGGATTGGGAGCAGTTAGCAGGAGGGCAGCATAAGTGGAGCCTGTGCTGGAATGG
right CCAGGGAATGGGAAGGGGATTGGGAGCAGTTAGCAGGAGGGCAGCATAAGTGGAGCCTGTGCTGGAATGG
*22*2222222*2222**2*2*2*2*****22*2***222*2**2*2*2**2*22*22*222222**
```

```
left  TTCAC-----GCCATTCTC-----CTGCCT-----CAGC----C
chrom GAGACCAAGACAGCCATTGAGAAAAGGGCTGGGTTGCAATTTAGCATGTCAGTGGAGC
right GAGACCAAGACAGCCATTGAGAAAAGGGCTGGGTTGCAATTT-----
222*2222222******22222222**22*2222222          111N    1
```

Other Simple Repeat Low Complexity DNA LTR LINE SINE

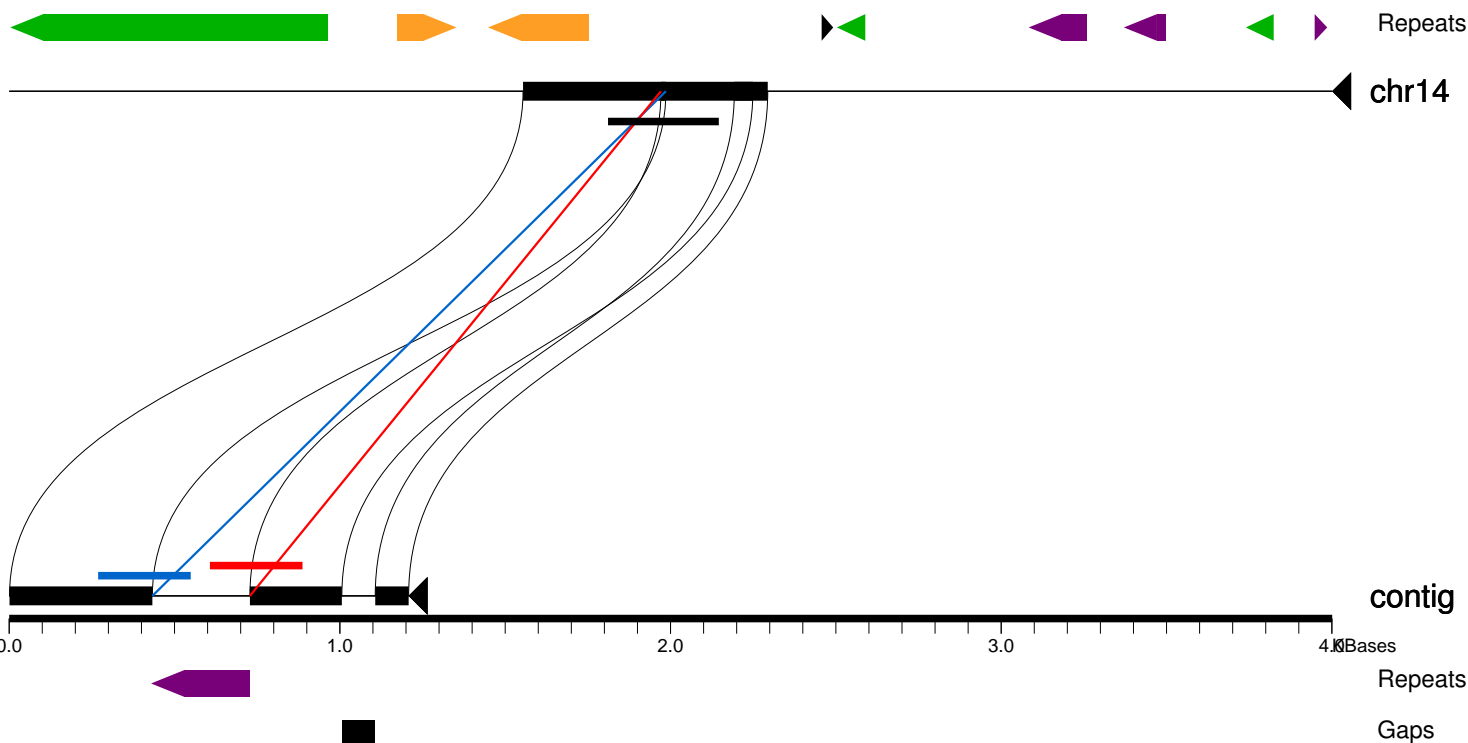

siteID: chr14\_98494406 Scaffitig3 + Breakpoint: chr14:98494377

chr14:98494334-98494436

Overlap Length: 17 INS size: 313 Genotyped: Yes

```
left  GTCAT-----GGGGTCTCCAT---CTGGGGAAACCCATATCATAAAAC-----CATCCAACCTCAAAG
chrom GTCAT-----GGGGTCTCCAT---CTGGGGAAACCCATATCATAAAAC-----CATCCAACCTCAAAG
right ATCCACCCGCCTCGGCCTCCCAAAGTGCTGGGATTACAGGTGTGAGCCACCGCGCCCGGCCAACCTCAAAG
      1**11111111111**11**1*1*1111*****111**111*1*1*111*1*11111*11*****
```

```
left  ACAGTTTGTGTTTGTGTTTGTGTTTTTTTTTTTTTTTGGAGACGGAGTCTCGCT-CTGTGCGCCAGGCCGG
chrom ACAGTTGCGTAG-GAACTGA-----AAAGGAACACTTGGAACATTTG--GAATCCAC
right ACAGTTGCGTAG-GAACTGA-----AAAGGAACACTTGGAACATTTG--GAATCCAC
      *****22**222*222**222222222222222*2*2*2*22**2*222*22*2*222*22**22
```

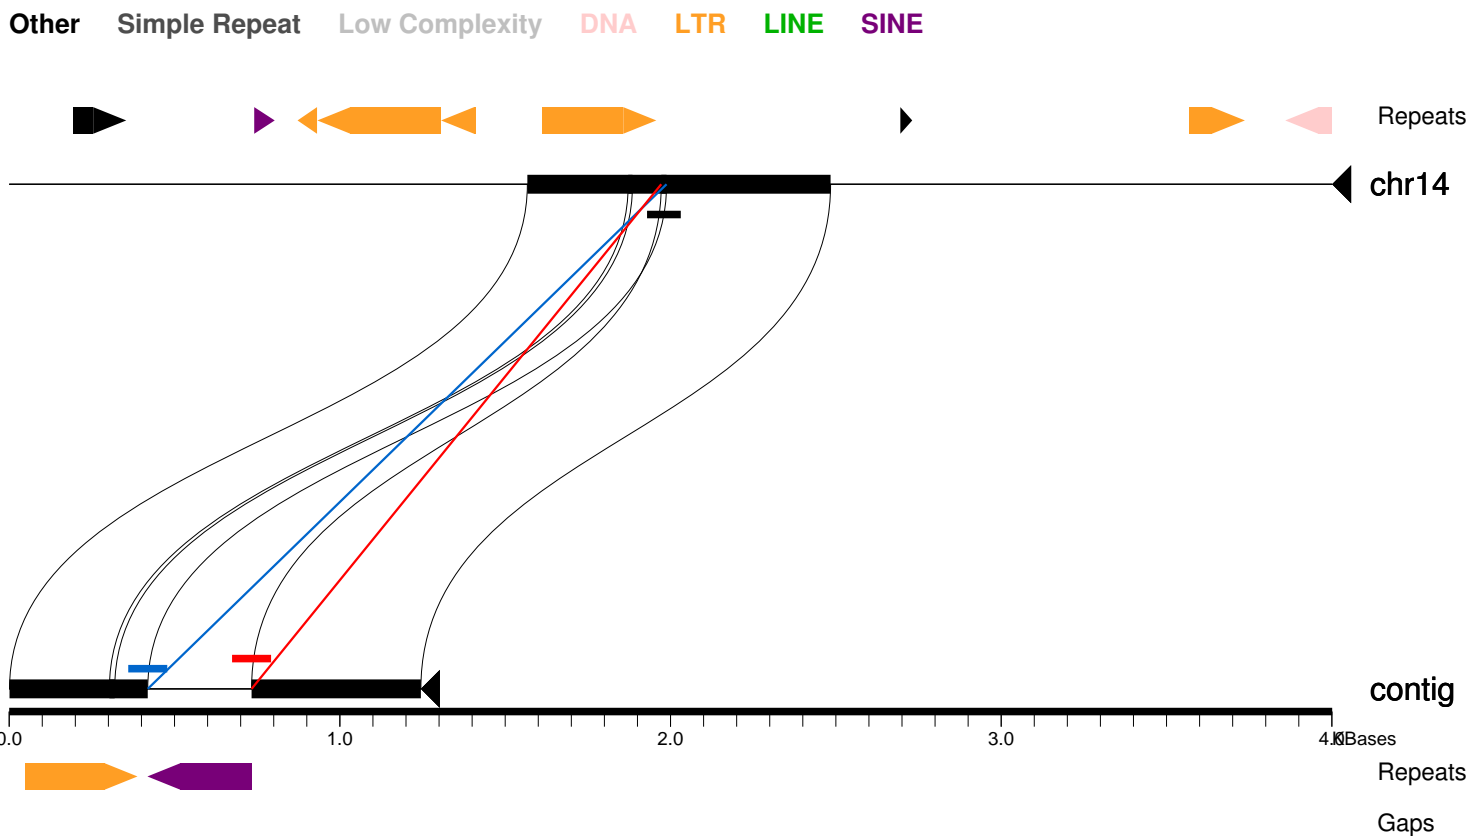





siteID: chr15\_20586592 Scafftig1 - Breakpoint: chr15:20586688

chr15:20586639-20586747

Overlap Length: 11 INS size: 66 Genotyped: Yes

```
left CTATTTTACCTTCATGACTACT-----ACAGGCTCTGAAACATATTGG--TGCTTAGAGACATTCT
chrom CTATTTTACCTTCATGACTACT-----ACAGGCTCTGAAACATATTGG--TGCTTAGAGACATTCT
right TTTTTTTTTTTTTTTTTTTTTTTTTTTTTTTTTTTGAGACAGAGTCTCGCTCTT-TTGCCCAGGCTGGAGACATTCT
1*1****111**11*111*11*111111111****11***1111*1*1***1111*11*1*****
```

```
left TTTTTTTTTTTTTTTTTTTTTTTTTTTTTTTTTTTGAGACAGAGTCTCGCTCTTTTGCC
chrom TAAAAACATTAATGAATGATGAAAAACATTTAAAAATTGTGTCACAAACAAG-----
right TAAAAACATTAATGAATGATGAAAAACATTTAAAAATTGTGTCACAAACAAG-----
*2222222**22*222*22*2222222***2222***2*2**2*22*22*2222222222
```

Other Simple Repeat Low Complexity DNA LTR LINE SINE

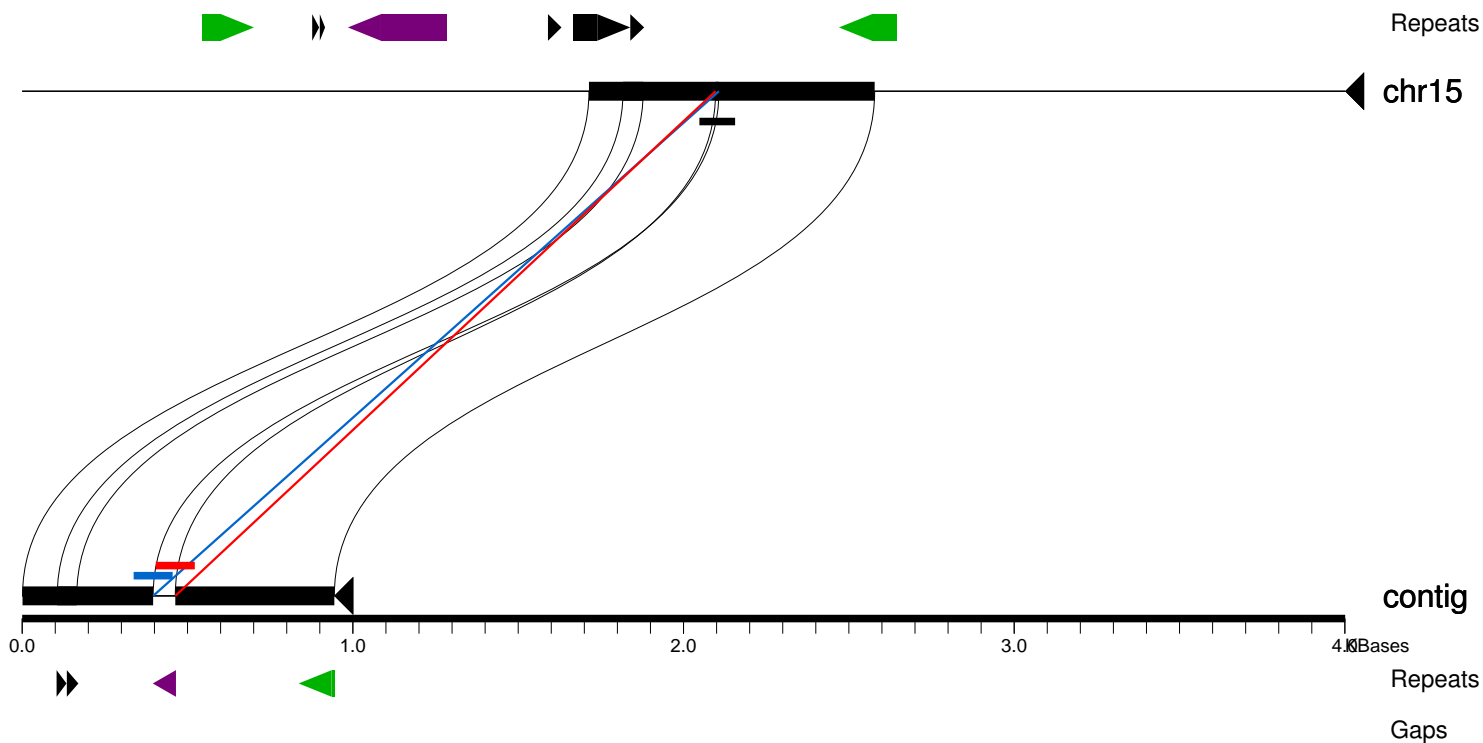

siteID: chr15\_21941237 Scafflig2 - Breakpoint: chr15:21941241

chr15:21941081-21941410

Overlap Length: 10 INS size: 180 Genotyped: Yes

```
left -----GAGTAACTTCAATTCATATGGTCCAAGTCTGACAAAAATGCATTCCTAACACCTGCATCTAA
chrom CAGATGATAGAGTAACTTCAATTCATATGGTCCAAGTCTGACAAAAATGCATTCCTAACACCTGCATCTAA
right -----GGAGCTTGCAGTGAG-----CCGAG-----ATCCCGCCAC-TGCA-----
          11*1*1***11*1*1*111111**1**1111111111111111**1*111***1****111111
```

```
left CACCAGCTTTATTGA-ATAATTTTCATCACGTTTCAAATCTGTGTCTCCTAGACCAGTTGAGCTCACAAAC
chrom CACCAGCTTTATTGA-ATAATTTTCATCACGTTTCAAATCTGTGTCTCCTAGACCAGTTGAGCTCACAAAC
right CTCCAGCCTGGGCGACAGAGCGAGACTCCGTCTCAAAAA-----AAAAAAAAAAAAAAAAAAAAAAAA
          *1*****1*1111**1*1*111111*111***1*****1111111111111111*1*11*1111*1111*1**1
```

```
left AAAAAGCAATTGTAGAGAGTTAGAAAAATAATGGC-----GGGCGC----CTGTAG----TCCAGCTA-
chrom AAAAAGCAATTGTAGAGAGTTAGAAAAATAATGGC-----GGGCGC----CTGTAG----TCCAGCTA-
right AAAAAAAAAAAAAAAAAAAAAAAGAAAAATATATGAAATTAGTGAACAAAAACAGTGAAACCTTCCAACCAG
          *****11**11111*1*1*1111*111***1*****222222222*2*22*2222*2**222222*2***2*2*2
```

```
left -----TTTGGGAGG---CTGAGGCAGGAGAATGAC---ATGAACCCGGGAGG-----CGGAGCTTG
chrom GAATGTTTTTGGAACTTTCTTTGTTAGTAATAGTTCCCTTATGGTTCCCTAAATATTTCAACCTCCCAGCATG
right GAATGTTTTTGGAACTTTCTTTGTTAGTAATAGTTCCCTTATGGTTCCCTAAATATTTCAACCTCCCAGCATG
          222222***2***22222**22*22**2*22*222*222***222*222*2222222222*22***2**
```

```
left CA-GTGAGCCG-----AGATCCCGCCACTGCACTCCAGCTGGGCGACAGAG
chrom AATGTGTCTCCCATCAAAAAGAGCCACAGAATAAACACAACCTCTTTTTTCA---
right AATGTGTCTCCCATCAAAAAGAGCCACAGAATAAACACAACCTCTTTTT-----
          2*2***222*222222222***2**2222*2*22**2*2*2*2222222N11222
```

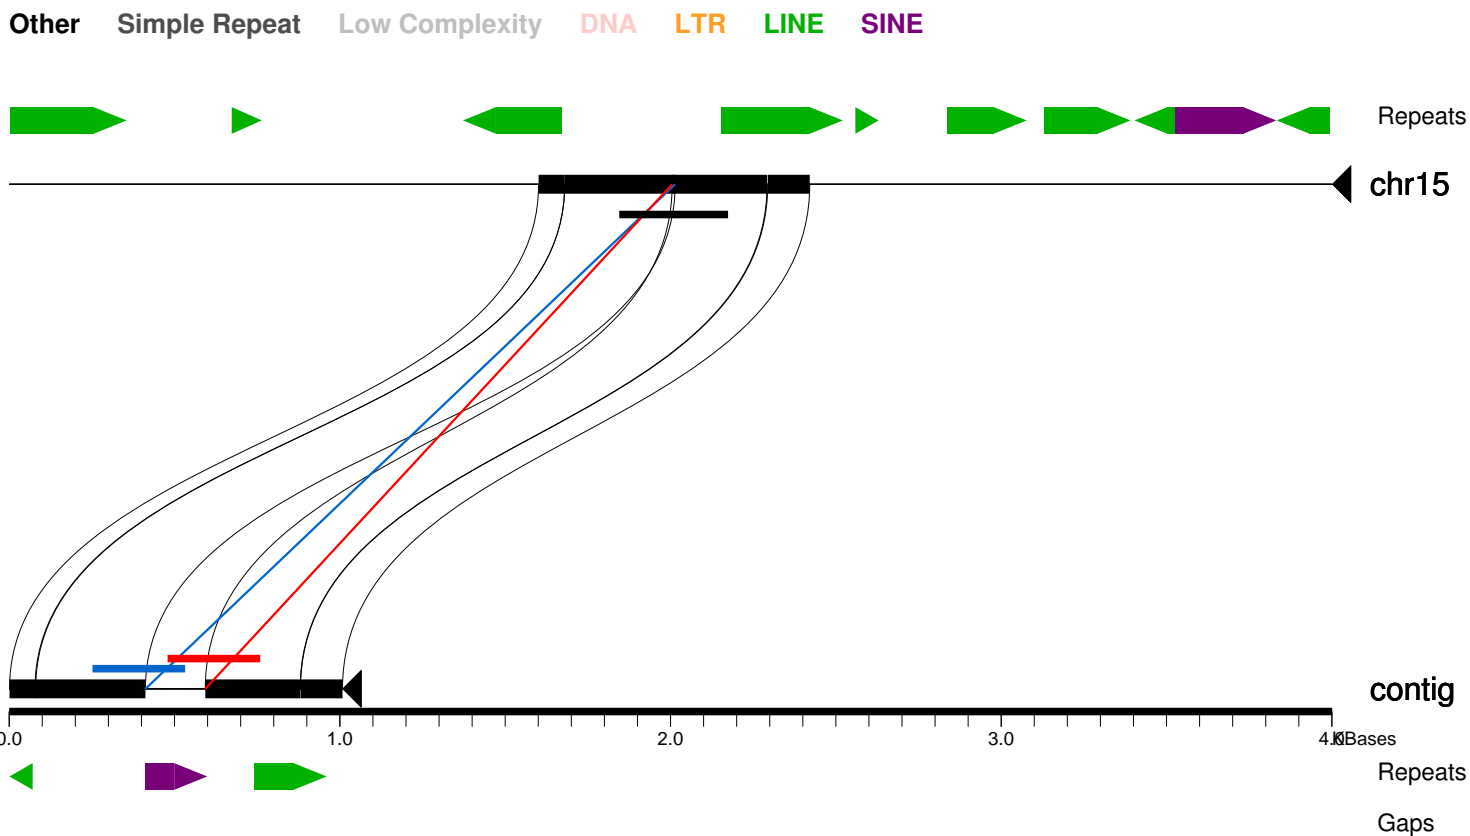



siteID: chr15\_22769064 Scaffoldig1 - Breakpoint: chr15:22769065

chr15:22769015-22769107

Overlap Length: 10 INS size: 307 Genotyped: Yes

```
left  --ATAT-----AAAGAACTCTCAAAACTCA-----AAATTAAGAA-----AAAAAATTTTA
chrom --ATAT-----AAAGAACTCTCAAAACTCA-----AAATTAAGAA-----AAAAAATTTTA
right CGAGATTGCGCCACTGCAGTCCGCAGTCCACCTGGGCGACAGAGCGAGACTCCGTCTCAAAAAAAAAAAAA
      11*1**111111*11*1*1**111*11*1**1111111111*1*111***111111111*****1111*
```

```
left  ATGAACAAAAATATTTAAGGCCGGGCGCGGTGGCTCACGCCTGTAATCCCAGCACTTTGGGAGGCCGAGGCG
chrom ATGAACAAAATATTTAACAGA---CATT---TCACC-----AAAAAAGTA-TCTGTCAA-----
right AAAAAAATAAATTTAAACAGA---CATT---TCACC-----AAAAAAGTA-TCTGTCAA-----
      *11**1***1***1***22*2*2222*22*222***222222**2222**2*2*2**22*22222222222
```

```
left  GGTGG
chrom -----
right -----
      22222
```

Other Simple Repeat Low Complexity DNA LTR LINE SINE

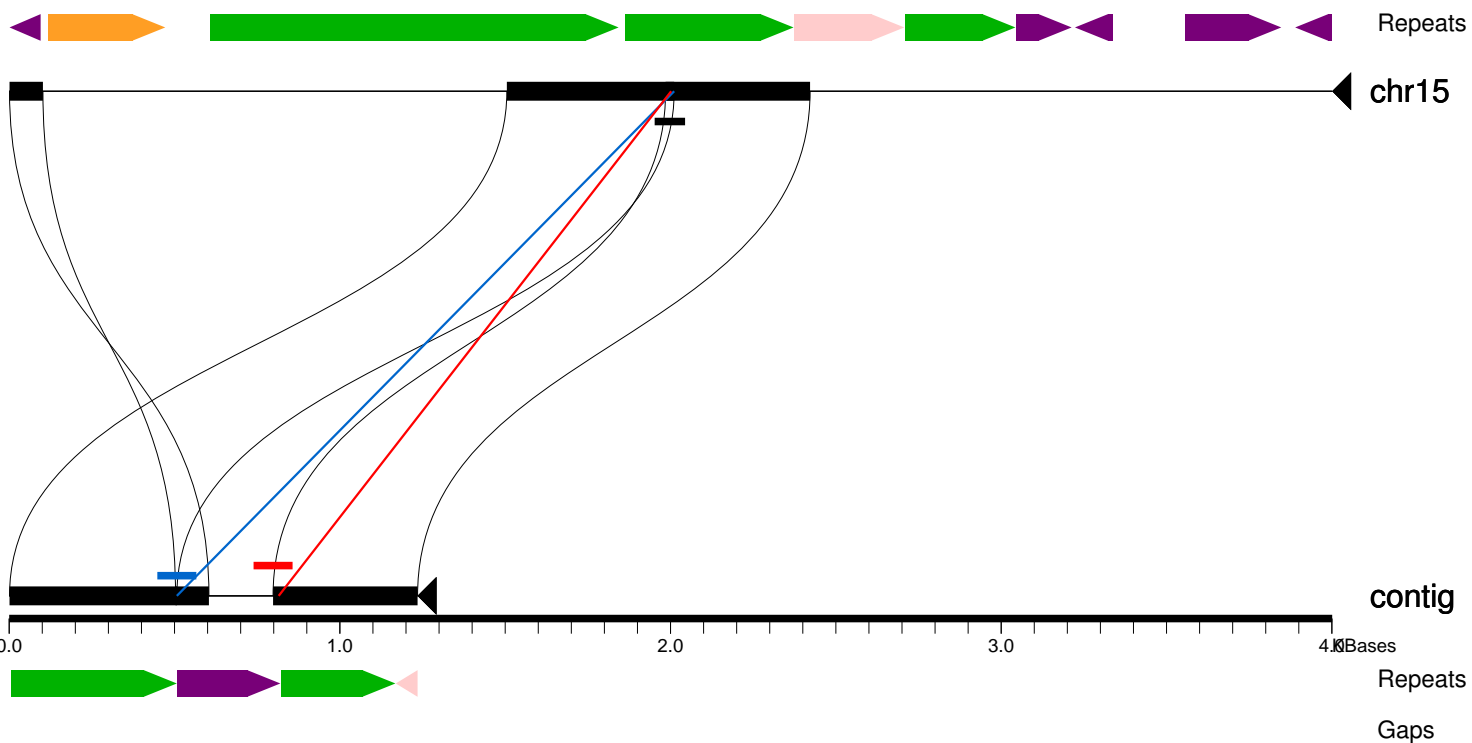

siteID: chr15\_23214991 Scaffitg5 - Breakpoint: chr15:23214969

chr15:23214923-23215028

Overlap Length: 14 INS size: 302 Genotyped: Yes

```
left TA---TCA--AGTT---TCTCAATGTCAGTTCTAGAGGA-----AAAAAAATTCCTTATAAAAAATTTAAC
chrom TA---TCA--AGTT---TCTCAATGTCAGTTCTAGAGGA-----AAAAAAATTCCTTATAAAAAATTTAAC
right TGCAGTCCGCAGTCCGGCCTGGGCAACAGAGCGAGACTCCGTCTCAAAAAAAAAAAAAAAAAAAAAAATAAAAAATTTAAC
*11111*1111***111111*1111111***11*1***111111111*****111111*1*****
```

```
left CTCGGCCGGGCGCGGTGGCTCACGCCTGTAATCCAGCACTTTGGGAGGCCGAGGCGGGTGG
chrom CTCAT-----GTGTAACA-GTTTCCATTCCCATAGCAATGACATTT-GATATACAT--
right CTCAT-----GTGTAACA-GTTTCCATTCCCATAGCAATGACATTT-GATATACAT--
**222222222222***222*2*22*22*2*****222*22*22*2222**222222*22
```

Other Simple Repeat Low Complexity DNA LTR LINE SINE

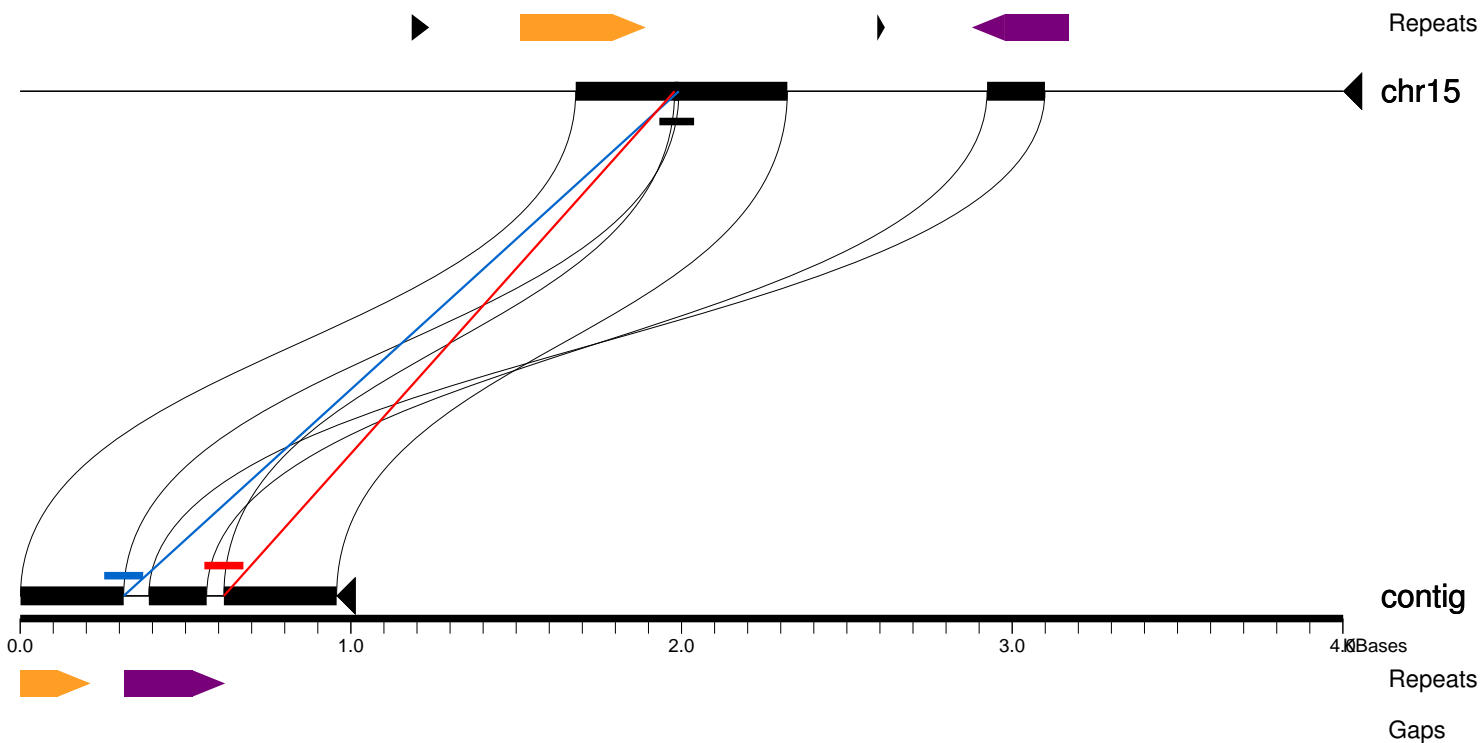

siteID: chr15\_24591148 Scafftig2 - Breakpoint: chr15:24591229

chr15:24591069-24591396

Overlap Length: 8 INS size: 295 Genotyped: Yes

left GGCATCCAGAGAGCGGTCCCCCAGCAGTGTTCATTCGGGTAGTAATGCG----GGAAGGCCCCGTCCGGT  
chrom C-CTTTCAGATTACT-TATGATGATATGTGAGCTTTTCATAG--ATGCCCTTTGAAATGAAGAAA---GT  
right ----TTTAG--TA-----GAGACGGGG---TTTCACCG-----TGTTAGCCAGGAT---GG  
N21N\*21\*\*1N221N21NNNNN2\*N2N\*1\*NNN1\*222211\*221111N 2\*N1\*N1N22N2N222\*1

left TCGTGTTCAGTGCCTAATTTGCTGCATGTTTTTATAAATACTGAATCTGGGAATTTTCAAGTGCTTGTTC  
chrom TC-TCTTATCTGCCTAATTTGCTGCATGTTTTTATAAATACTGAATCTGGGAATTTTCAAGTGCTTGTTC  
right TC-TCG-ATCT-CCTGACCTCGTG-----ATCCGCCCGCCTC--GGCCTCCCAAAGTGCTGGGATT  
\*\*2\*211222\*1\*\*\*1\*11\*11\*\*111111111\*\*1111\*1\*11\*\*11\*\*11\*1111\*\*\*\*\*1\*1111

left ACACCTTCTGAGATGATTGTGTAGTTTTTATTCTTTT-----TTTGTGAGACGGAGTCTCGC-TCT  
chrom ACACCTTCTGAGATGATTGTGTAGTTTTTATTCTTTTATTAATATAGTGTATGACATTAATTGTATCATAT  
right ACAGGCG-TGAGCC-ACCGCGCCCGCCTATTCTTTTATTAATATAGTGTATGACATTAATTGTATCATAT  
\*\*\*11111\*\*\*111\*11\*1\*1111111\*\*\*\*\*\*2\*\*22\*2\*22\*2\*2\*\*\*2\*222\*2\*2\*22\*2\*2\*

left GTCG--CCCAGGCTGGAGTGCAGTGGC-----GCGAT-----CTCG-----GCT  
chrom GTTGAACCAAACCTTGCATTCCCTGAGGTAAAATACCTTTTGGCCATAGTTTATAAATACTTTCTACATGTTGCT  
right GTTGAACCAAACCTTGCATTCCCTGAGGTAAAATACCTTTTGGCCATAGTTTATAAATACTTTCTACATGTTGCT  
\*\*2\*22\*\*2\*222\*\*2\*2\*2\*2\*\*22222222222\*\*2\*\*2222222222\*\*2222222222\*\*\*

left CACTGCAA--GCTTCCGCCTCCCGGT-----TCACGCCATTCT-----CCTG  
chrom GATTTCAATTTGATAATGTCTCCCTGGTGATTTTTGTCTCTGTATTTATAAAGGCATA  
right GATTTCAATTTGATAATGTCTCCCTGGTGATTTTTGTCTCTGTATTTAT-----  
2\*2\*2\*\*222\*2\*222\*2\*\*\*\*\*2\*\*2222222\*2\*222\*\*222 1N1N

Other Simple Repeat Low Complexity DNA LTR LINE SINE

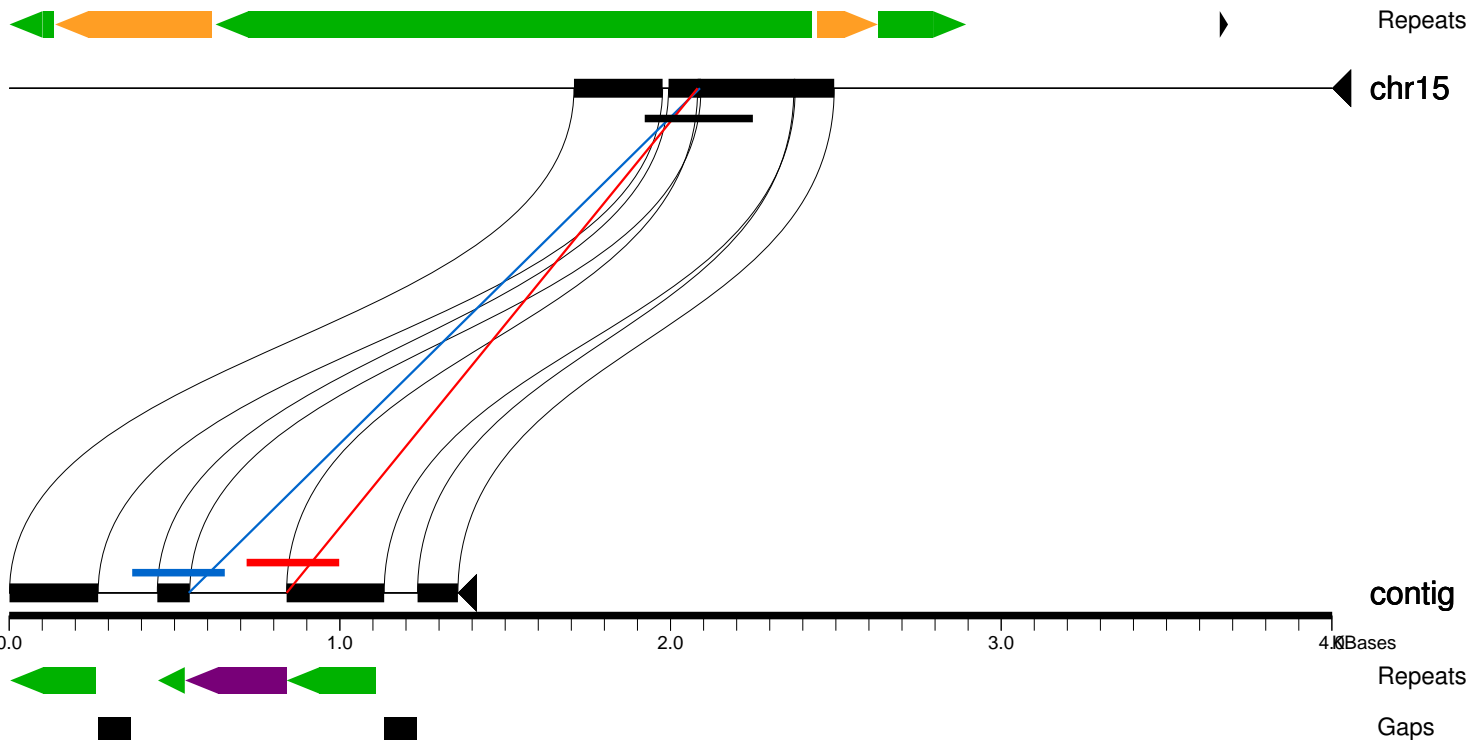

siteID: chr15\_25735654 Scaffitig15 - Breakpoint: chr15:25735654

chr15:25735610-25735713

Overlap Length: 16 INS size: 308 Genotyped: Yes

```
left      T----GACTGGCAGA---AGAAATAAT-----ATAATCCAATTCTATTCTGTCTATAAGAGATACAG
chrom     T----GACTGGCAGA---AGAAATAAT-----ATAATCCAATTCTATTCTGTCTATAAGAGATACAG
right    CTCCAGCCTGGGCGACAGAGTGAGACTCCGTCTCAAAAAAAAAAAAAAAAAAAAAAAAAAAAAAAAAAAGAGATACAG
          11111*1****11**111**11*1*1*11111111*1**111**1111*11111111*1*****

left      TTTAGGCTGGGCGCGGTGGCTCACGCCTGTAATCCCAGCACTTTGGGAGGCCGAGGTGGGC----GGA
chrom     TTTAGATT-----TGAAAACCAAATACATTAAAAAGTAAAAATGATGGAAAAAGGG
right    TTTAGATT-----TGAAAACCAAATACATTAAAAAGTAAAAATGATGGAAAAAGGG
          *****22*22222222222222222222**2**2**2*22**2**222**2222*2*22**2222**2
```

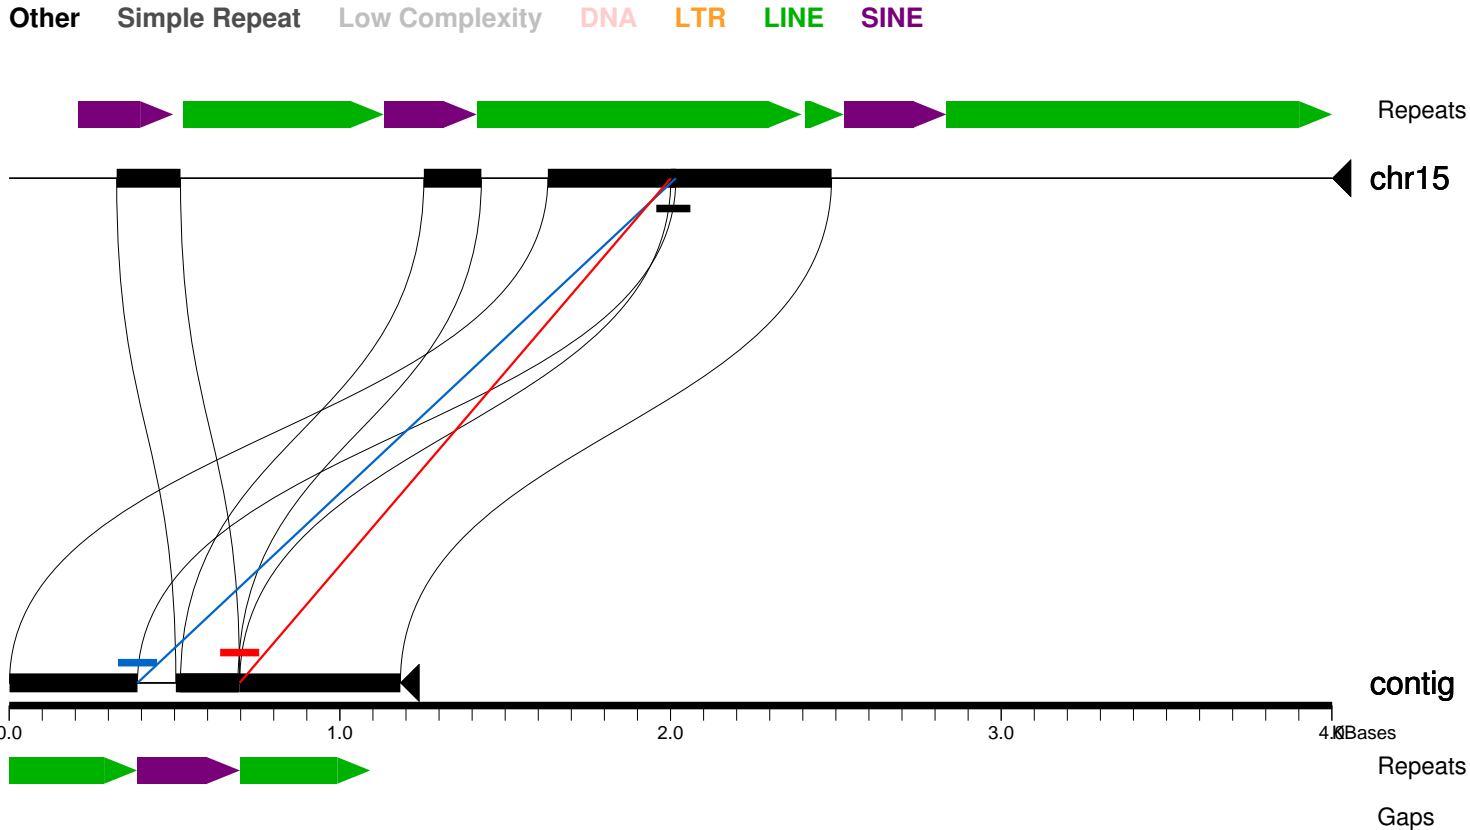

siteID: chr15\_26141229 Scaffoldig2 + Breakpoint: chr15:26141233  
chr15:26141205-26141292  
Overlap Length: 15 INS size: 301 Genotyped: Yes

```
left      AAG-----ATGAATTGGAAACAAAT---TGTTCAT-----AGTAATCTAAT
chrom     AAG-----ATGAATTGGAAACAAAT---TGTTCAT-----AGTAATCTAAT
right    CCGCCCGCCTCGGCCTCCCAAAGTGCTGGGATTACAGGCGTGAGCCACCGCGCCCGGCCAGTAATCTAAT
          11*111111111111111111111111*1*111***1*11*1*1111**11***1111111111111111*
```

```
left      TTTTTFEEEEEEEEEETTTTTFAGAGACGGAGTCTCGCTCTGTCACCCAGGCTGGAGTGCAGTGGCGGGA
chrom     TTTTAATAATCTCATGTTTTT-----GCATT-----TGTGCCA-----GAAGGA
right    TTTTAATAATCTCATGTTTTT-----GCATT-----TGTGCCA-----GAAGGA
          ***22*22*2*22*2*****2222222*2*2*2222*2**2*2222222222222222*22***
```

```
left      TCTCGGCTCA
chrom     AATAATCTCC
right    AATAATCTCC
          22*222***2
```

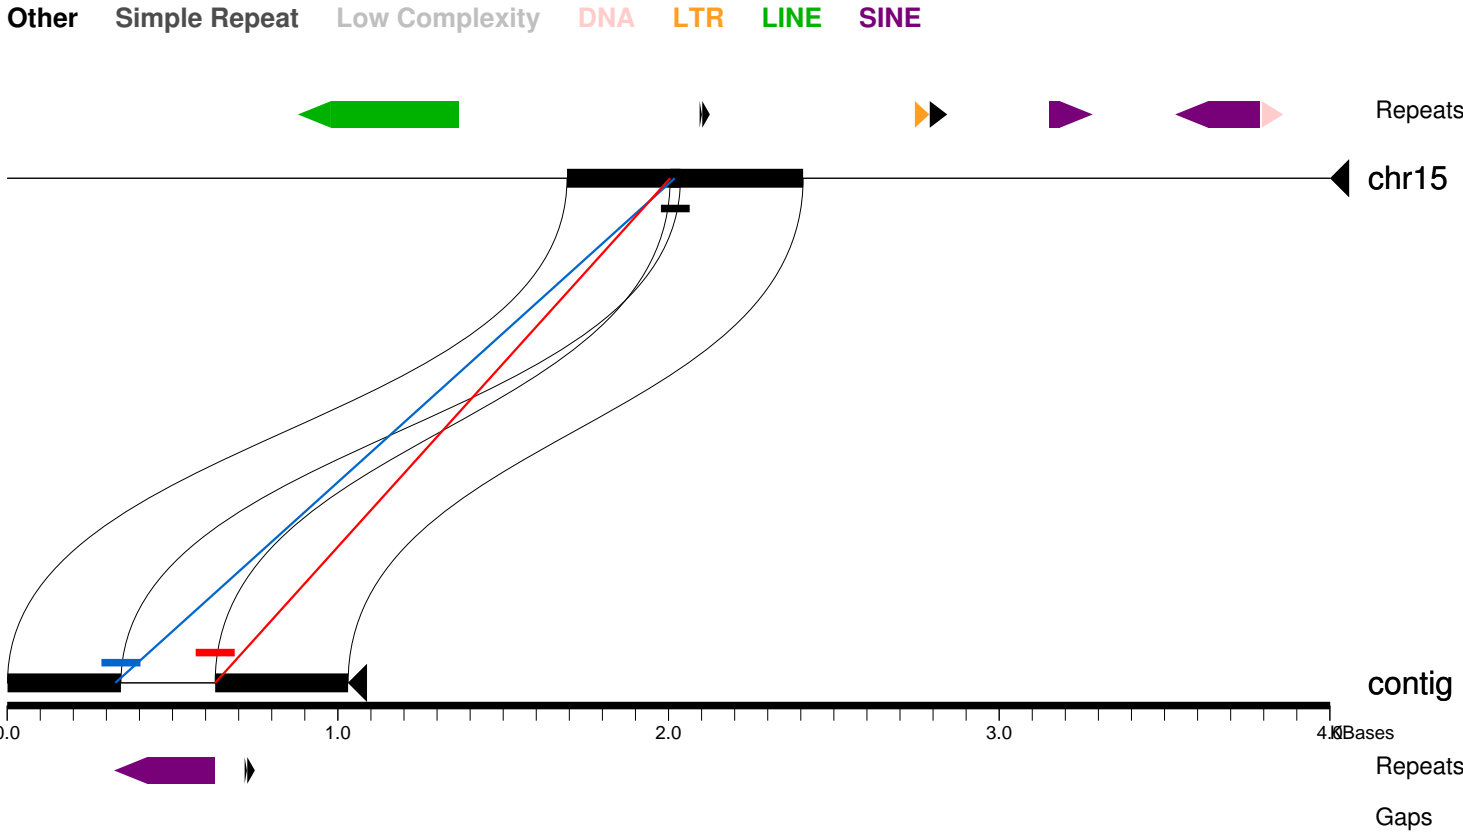

siteID: chr15\_26872530 Scafftig5 + Breakpoint: chr15:26872513

chr15:26872355-26872683

Overlap Length: 11 INS size: 319 Genotyped: Yes

left ----GAAAAAACATTCCTTTCAAAATGTTA--CTGCTCATTTTCAATGTACCTGGTCAC-TCAAGAGCTC  
chrom TC-AGAAAAAACATTCCTTTCAAAATGTTA--CTGCTCATTTTCAATGTACCTGGTCAC-TCAAGAGCTC  
right TTTAGTAGAGACGGGG-TTTCACCGTGTAGCCAGGATGGTCTCGATCT-CCTGACCTCGTGATCCGCCC  
2N12\*1\*1\*1\*\*11111\*\*\*\*\*111\*\*\*\*\*11\*1\*11111\*1\*\*1\*\*1\*1\*\*\*\*11\*1\*1\*1\*111\*\*1\*

left TAATGGATATGTACAAAGAGATGAATGTTGTTTTCATGTCTGCTAACACAACATCCATTCTACAGCCCAT  
chrom TAATGGATATGTACAAAGAGATGAATGTTGTTTTCATGTCTGCTAACACAACATCCATTCTACAGCCCAT  
right GCCTCGGCCTCC-CAAAGTGCTGG-----GATTACAGGCGTG-----AGCCA-----CCGCGCC-  
111\*1\*111\*111\*\*\*\*\*1\*1\*\*1111111\*1\*\*1\*\*1\*11\*\*11111111111\*1\*\*\*11111\*1\*\*1\*11

left AGATCAAGGAGAAACTGACTTTCAAGTTTTATTTATTTATTTATTTATTT-----  
chrom AGATCAAGGAGAAACTGACTTTCAAGTTTTATTTATTTAAGAAATACATTTCACAAAGGCTGTAGCTGCCAT  
right -----CGGCC---CAAGTTTTATTTAAGAAATACATTTCACAAAGGCTGTAGCTGCCAT  
111111111111111\*1\*1\*111\*\*\*\*\*22\*\*2\*222\*\*22\*\*\*2222222222222222222222222222222222

left ----ATTTATTTTTTTTTTTTTTTTTTTTGGAG--ACGGAGTCT-----CGCTCTGTC---GCCCAGG-----  
chrom AGACAGTGATTATTTTTACGGATCTGGGCAAAGTAAACTGAAAAACATTTCTGGAAAAGGACTAGATGTCATT  
right AGACAGTGATTGTTTTACGGATCTGGGCAAAGTAAACTGAAAAACATTTCTGGAAAAGGACTAGATGTCATT  
2222\*2\*2\*\*\*N\*\*\*\*\*22222\*2\*2\*22\*2\*22\*\*22222\*22\*\*\*22222\*2\*2\*\*22222222

left CTGGAGTGCAGTG-GCGCGATCTCGGCTCACTGCA--AGCTCCGCCCTCCCGG-  
chrom CTAGATGTCAGTAAGAACATTCATGATTTATAGGAGGAGGTCAAAAATATCAAC  
right CTAGATGTCAGTAAGAACATTCATGATTTATAGGAGGAGGTC-----  
\*\*2\*\*222\*\*\*22\*22\*22\*\*22\*22\*2\*22\*2\*22\*\*2\*NNNN1NN1NN

Other Simple Repeat Low Complexity DNA LTR LINE SINE

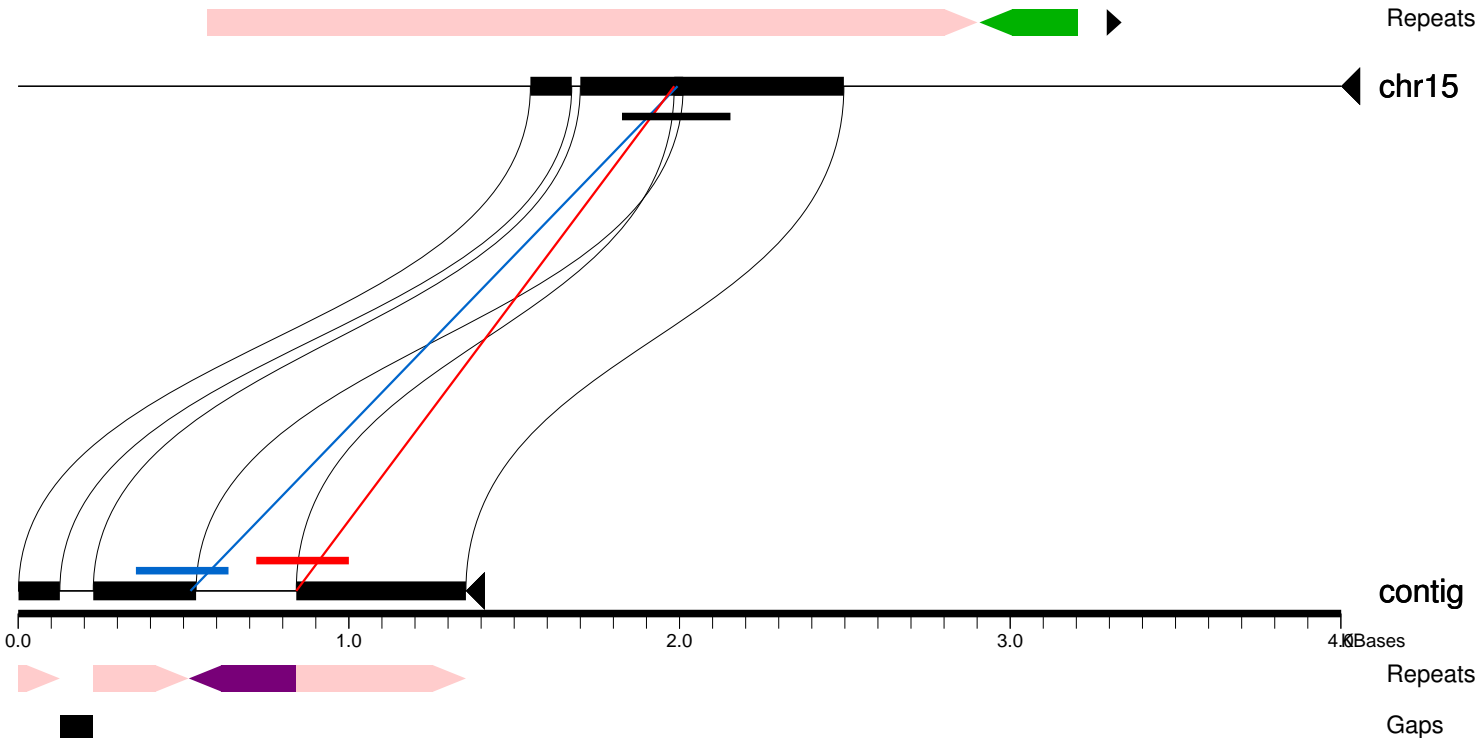

siteID: chr15\_27765800 Scafftig7 + Breakpoint: chr15:27765781

chr15:27765735-27765840

Overlap Length: 11 INS size: 316 Genotyped: Yes

```
left  TGAGCACACA-----CTAAAACCTCAGTCTTTTCATGAATTTTTCTCTG-----GTTCCCAAAATCTT
chrom TGAGCACACA-----CTAAAACCTCAGTCTTTTCATGAATTTTTCTCTG-----GTTCCCAAAATCTT
right TCCACCCGCCTCGGCCTCCCAAAGTGCTGGGATTACAGGCGTGAGCCACCGCGCCCGGC*CCCAAAATCTT
      *111*1*1*1111111111*1***111*1*111**1**1*11*1111*1*1*11111*11*****

left  TTTTTTTTTTTTTTTTTTTTTTTTTTTTTTTTTTTGAGACGGAGTCTCGCTCTGTGCGCCAGGCCGGACT
chrom CTTAATAAAAACACTAACTTTTCAGTAGT-----TTTAGAACTGT-GCAACGT---GTAT
right CTTAATAAAAACACTAACTTTTCAGTAGT-----TTTAGAACTGT-GCAACAT---GTAT
      2**22*2222222*222***222*22*222222222*2*2*22***2**22212222*22*
```

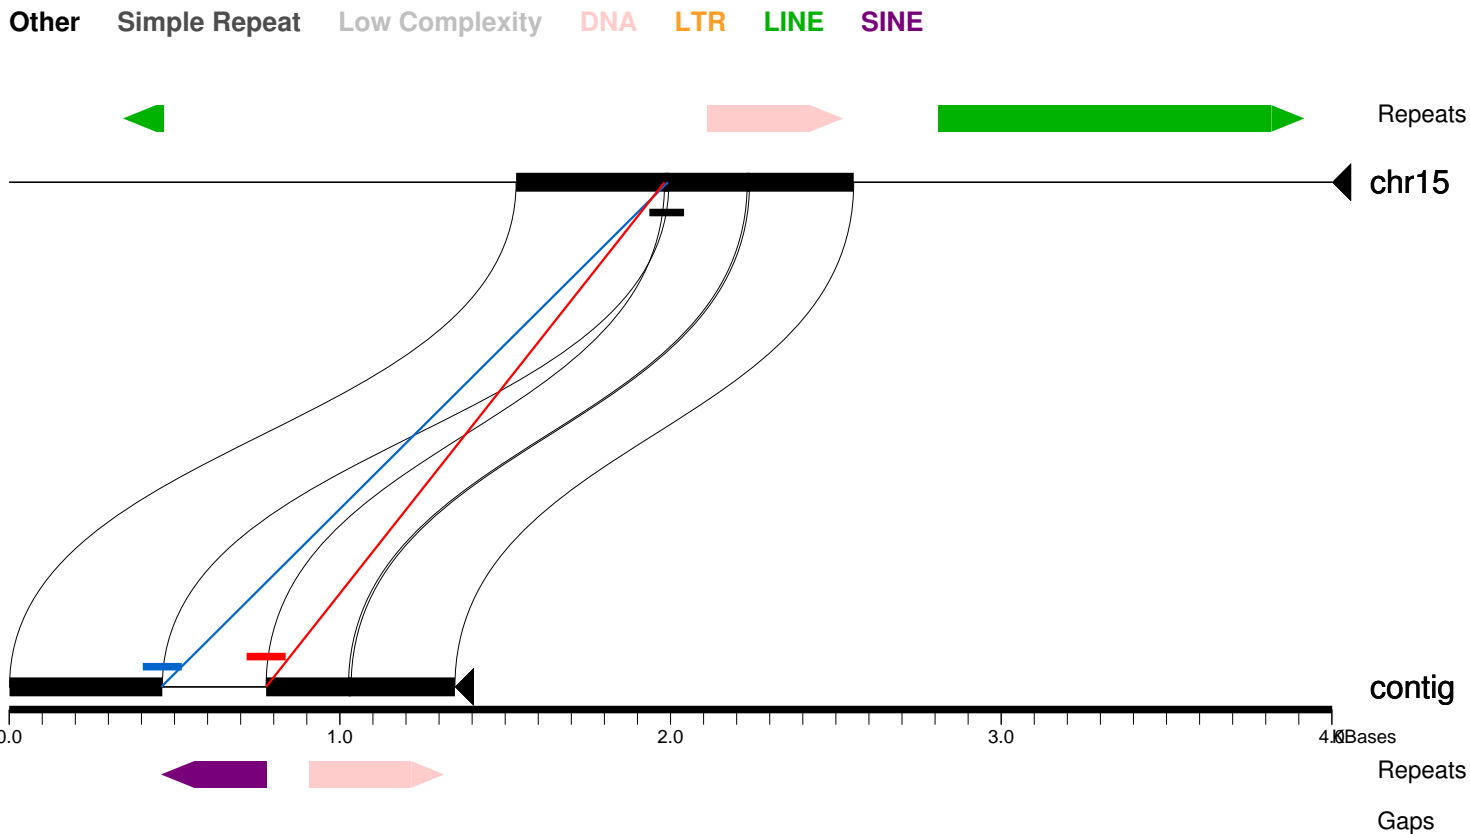

siteID: chr15\_28174925 Scffrig8 + Breakpoint: chr15:28174961

chr15:28174918-28175019

Overlap Length: 17 INS size: 106 Genotyped: Yes

```
left  ATAAATTTTAAATTCCTCAAATTC AAC---AAGTAAACA-----ACACAATTC AAATGGGA
chrom ATAAATTTTAAATTCCTCAAATTC AAC---AAGTAAACA-----ACACAATTC AAATGGGA
right CTGGAGTGCAGTGGCGCGATCTCGGCTCACTGCAAGCTCCGCCTCCCGGGTTCACGCCAT-C AAATGGGA
      1*11*1*1111111*1*1*11**11*11111*1**1*11111111111111111**1*1**1*****
```

```
left  AAAATTTT TTTTTTTTTTTTTTTTTTTT TGGAGACAGAGTCTCGCTCT--GTCGCC-AGGCTGGAGTGCAGTG
chrom AAAATTTT TTTTTTTTTTTTTTTTTTTT TGGAGACAGAGTCTCGCTCT--GTCGCC-AGGCTGGAGTGCAGTG
right AATATTTT-----AAACAGACACTTCAACAAAGAAGACATAAGATTGACA--AATG
      AATATTTT-----AAACAGACACTTCAACAAAGAAGACATAAGATTGACA--AATG
      **2*****22222222222222222222*2*****22**2222*222*22*2*22*2*2*2**2222*2**
```

```
left  -
chrom A
right A
      2
```

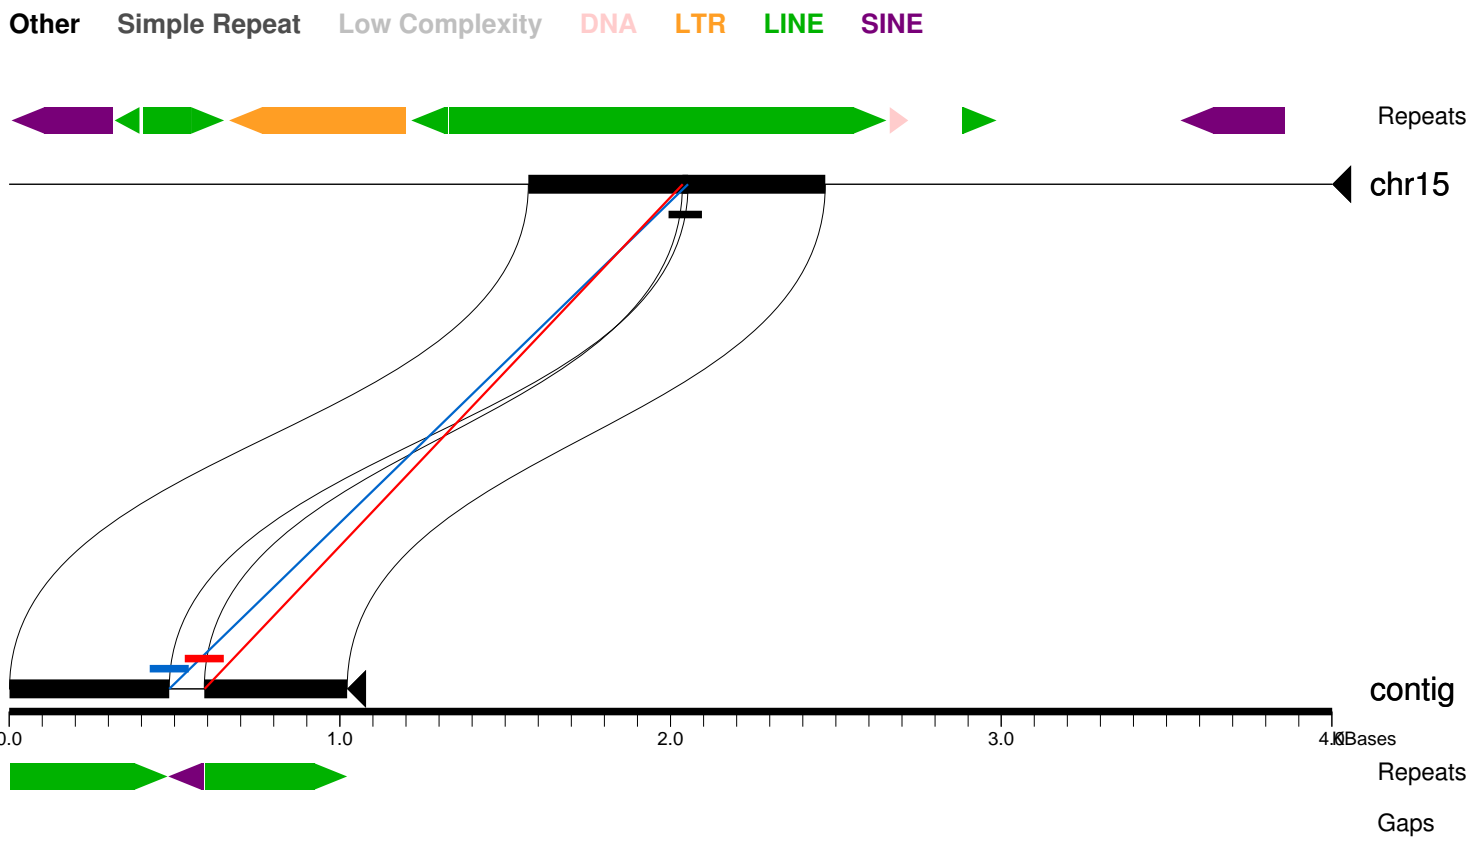



siteID: chr15\_34207226 Scaffold3 + Breakpoint: chr15:34207228  
chr15:34207184-34207287  
Overlap Length: 16 INS size: 383 Genotyped: No

```
left  GGAAACAGCAGGGA-----CAAGATGCATACCAGAAAAGAAAGTACCCTCAAAAAATGATG
chrom GGAAACAGCAGGGA-----CAAGATGCATACCAGAAAAGAAAGTACCCTCAAAAAATGATG
right NNNNNNNNNNNNNNNNNNNNNNNNNNNNNNNNNNNNNNNNNNNNNNAAAAAAAAAAAAAAAAAAAAAA*AAAAATGATG
      111111111111111111111111111111111111111111111111111111111111111111*1*11*1***1***11*111111*****
```

```
left  GGGAAAGGCCGGGCGCGGTGGCTCACGCCTGTAATCCCAGCACTTTGGGAGGCCGAGGCGGGCGG
chrom GGGAAACA-----TG--TCACAAATATACAGC-AGTAGTTAAAAAGGGCT--TCCAACCTG
right GGGAAACA-----TG--TCACAAATATACAGC-AGTAGTTAAAAAGGGCT--TCCAACCTG
      *****22222222222222**22*****222*2**222*2**2*2**2222***2*2222*222*2*
```

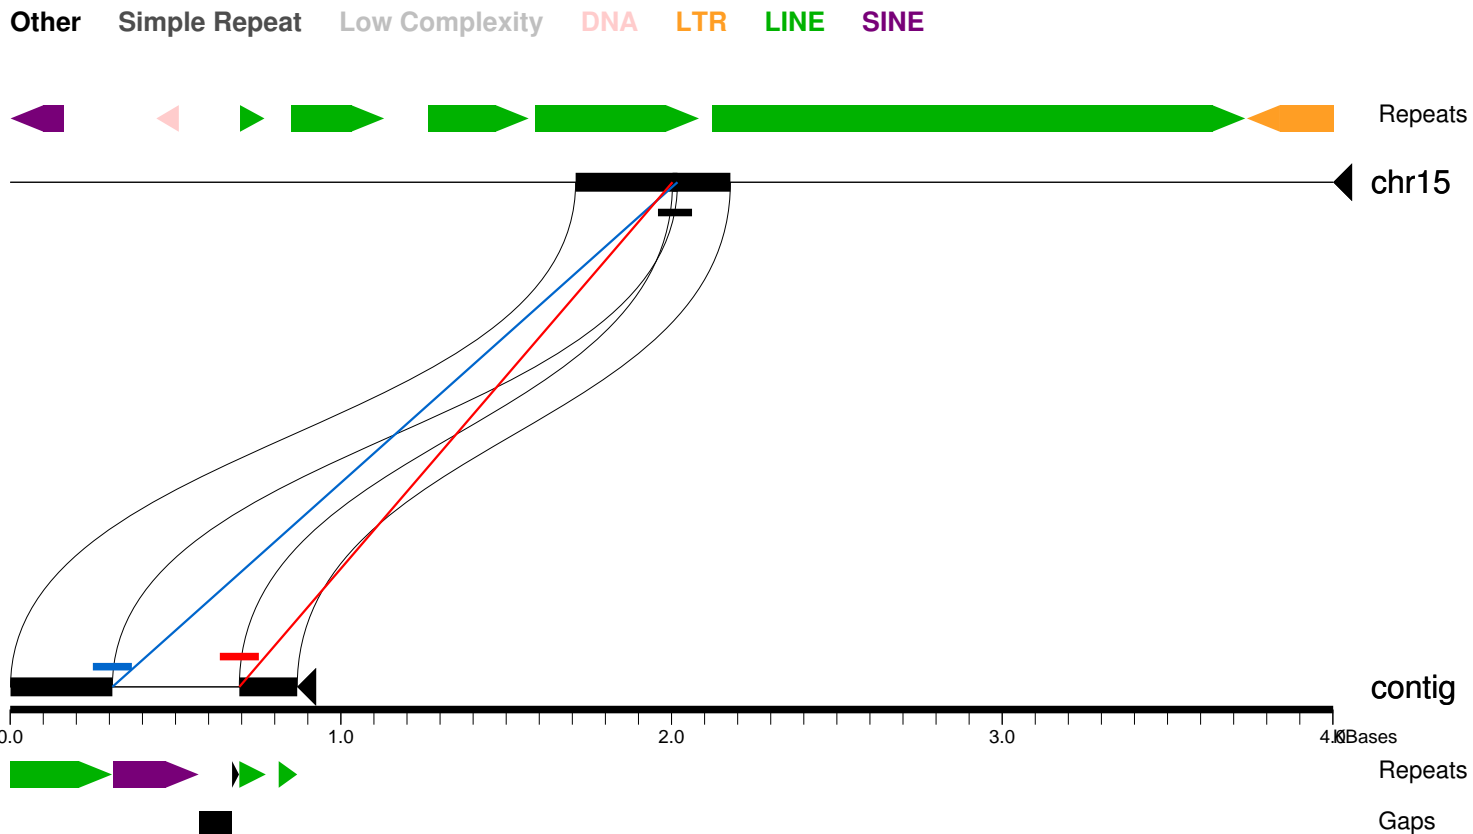

siteID: chr15\_35473608 Scafftig1 + Breakpoint: chr15:35473615

chr15:35473574-35473674

Overlap Length: 19 INS size: 286 Genotyped: Yes

```

left  -----CAACATATGTAAACGCAGGCACTAAATATAGCAGCCATCCT-----CCCTGTGTTCA
chrom -----CAACATATGTAAACGCAGGCACTAAATATAGCAGCCATCCT-----CCCTGTGTTCA
right ATCCGCCCCGCTCGGCCTCCCAAAGTGCTGGGATTACAGGCGTGAGCCACCGCGCCCGGCCTGTGTTCA
      1111111111111111*11*1*1111**11**1**1*1**1*1111111*****1*111111111******

```

```

left  CTATTCTTTTGTGAGACGGAGTCTCGCTCTGTGCGCCAGGCTGG-AGTGCAGTGGCGGGATCTCGG
chrom CTATTCTTGCCCT-----CAGATTCTCT---TGTCAGTTATAAAAA-AAAAC-----TCTGCT
right CTATTCTTGCCCT-----CAGATTCTCT---TGTCAGTTATAAAAAACAAAAC-----TCTGC-
      *****2222*22222*2**2****2222*****2222*2222221*222*222222222***22N

```

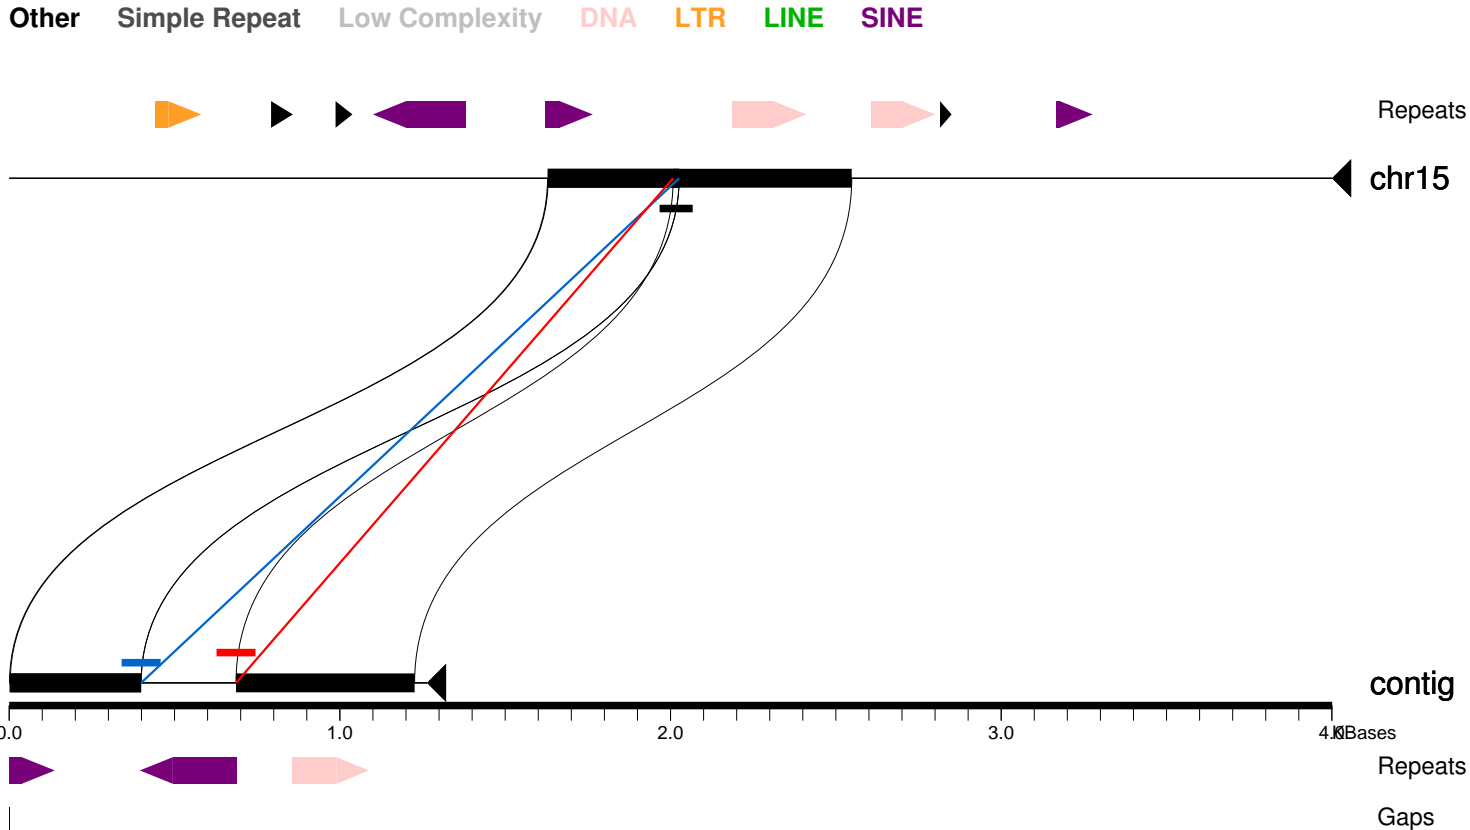

siteID: chr15\_36096323 Scaffold4 + Breakpoint: chr15:36096309

chr15:36096265-36096368

Overlap Length: 16 INS size: 294 Genotyped: Yes

```
left   -TAATCTCTTTTCTGTCTCAAAA-----TGTGATTTCTGTATTTATAT-----GTCAGTTTCAGTA
chrom  -TAATCTCTTTTCTGTCTCAAAA-----TGTGATTTCTGTATTTATAT-----GTCAGTTTCAGTA
right  ATCCGCCCCGCCTCGGCCTCCCAAAGTGTGGATTACAGGCGTGAGCCACCGCGCCCGGCAGTTTCAGTA
1*111*1*111**1*1***11**11111**1***1*1*111*1*1111111111111*1*****

left   TTTTTFTTTTTTTTTTTTTTTTTGGAGACGGAGTCTCGCTCTGTCTGCCAGGCTGGAGTGCAGTGGCG
chrom  TTTTTAATGAACATTT---CAAACACT---TTTCAATTTAAAA---AGGC---AACAAAATG---
right  TTTTTAATGAACATTT---CAAACACT---TTTCAATTTAAAA---AGGC---AACAAAATG---
****22*22222***22222*2**2222*2**22*2*2222222****222*2222*2**222
```

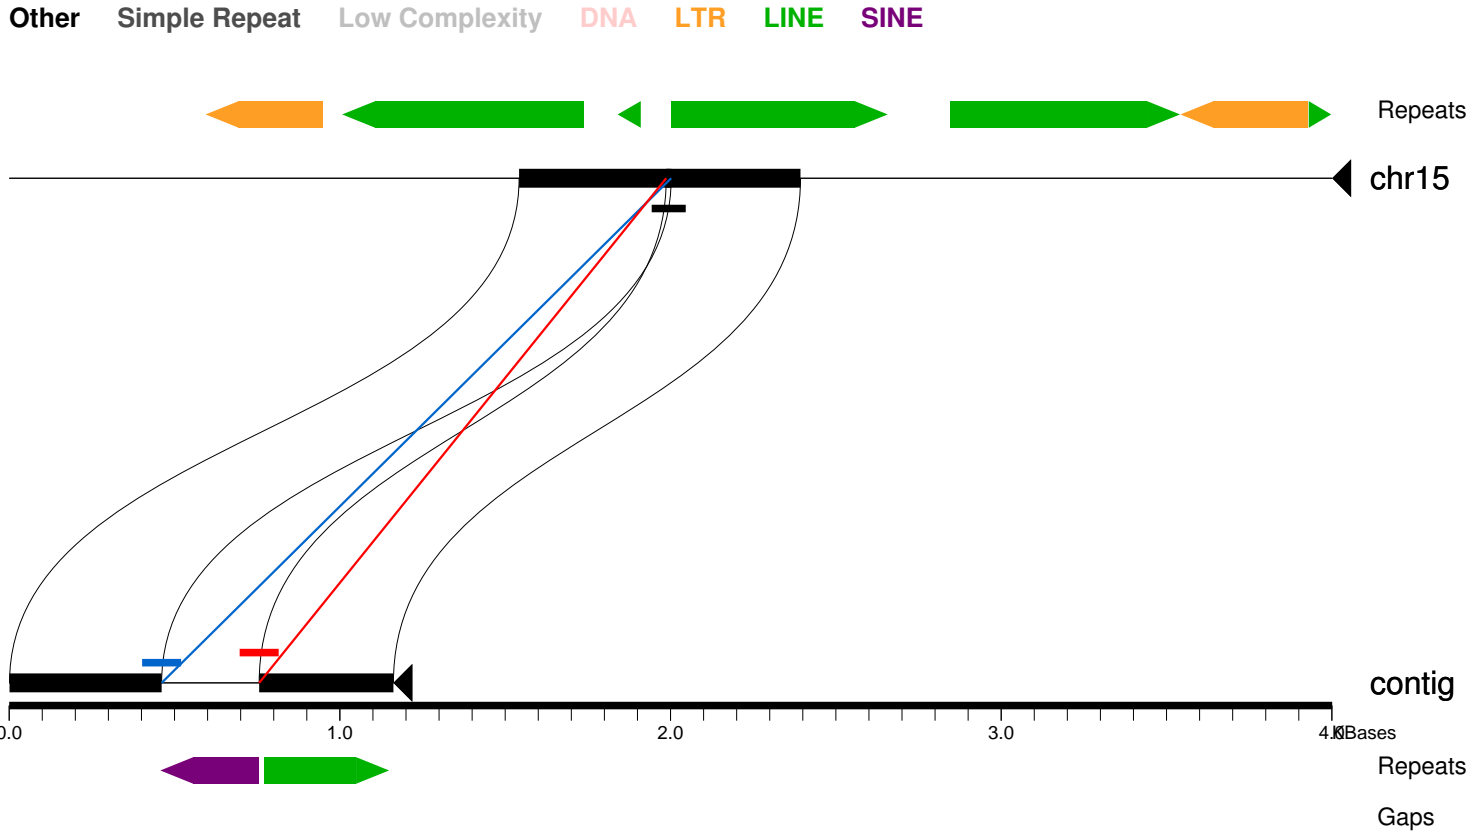

siteID: chr15\_36640196 Scafftig4 - Breakpoint: chr15:36640171

chr15:36640126-36640230

Overlap Length: 15 INS size: 226 Genotyped: Yes

```
left  AGTT-ATAGATGCCTAG---AAAGATGCAGGTTTTTT-----AAACCAATTCTTAAAAATCAGCC
chrom AGTT-ATAGATGCCTAG---AAAGATGCAGGTTTTTT-----AAACCAATTCTTAAAAATCAGCC
right ACTGCACTCCAGCCTGGGCGACAGAGCGAGACTCCGTCTCAAAAAAAAAAAAAAAAAAAAAAAACAGCC
      *1*11*11111*****1*111*1***111**11*111*1111111111***11*11111*****1*****

left  TCTTGA--TC-GAGACCATCCCGGCTAAAACGGTGAACCCCGTCTCTACTAAAAATACAAAAAAT
chrom TCTTACTTCAGAGTTTTTTCCTACACATACAT-----GTTTCTC-----ACTATGAAT
right TCTTACTTCAGAGTTTTTTCCTACACATACAT-----GTTTCTC-----ACTATGAAT
      ***2*22*2***2222*2**22*22*2**2222222222**2***222222222**2*22***
```

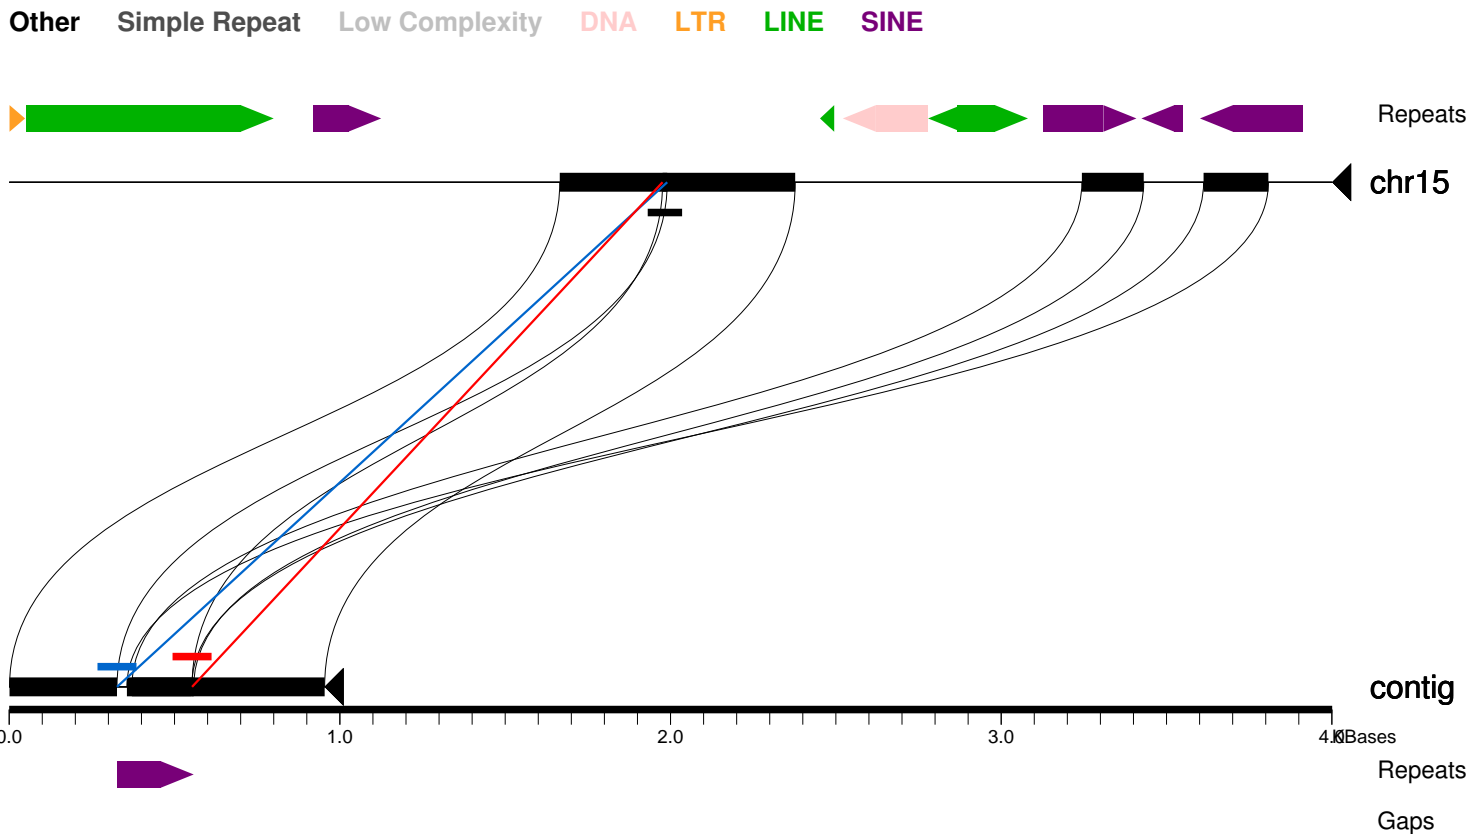

siteID: chr15\_36672695 Scaffig2 - Breakpoint: chr15:36672679  
chr15:36672640-36672738  
Overlap Length: 18 INS size: 290 Genotyped: Yes

```

left      -----ATGTGATGTCATTATAATATATTTGAAATTATTTTATTTAAATTTTTTC
chrom    -----ATTGTGATGTCATTATAATATATTTGAAATTATTTTATCAAATTTTTTC
right    TCCGCCCGCCTCGGCCTCCCAAAGTGTGGGATTACAGGCGTGAGCCACCGCGCCCGGC*CAAATTTTTTC
          11111111111111111111111111*11***1**11****1*11111111111*111111111112*****
left     TATTTT*TTTTTTTTTTTCAGACGGAGTCTCGCTCTGTGCGCCAGGCTGGAGTGCAGTGGCGGGATCTCGG
chrom   TATTTT*TATTACAATTCTCCCTGCGAGT-----TTTTGA----GCTATATTTCA-----TATT
right  TATTTT*TATTACAATTCTCCCTGCGAGT-----TTTTGA----GCTATATTTCA-----TATT
          *****2**2222***222*2*2*22*22222*2*2*22222***22*2*2**2222222222*222

```

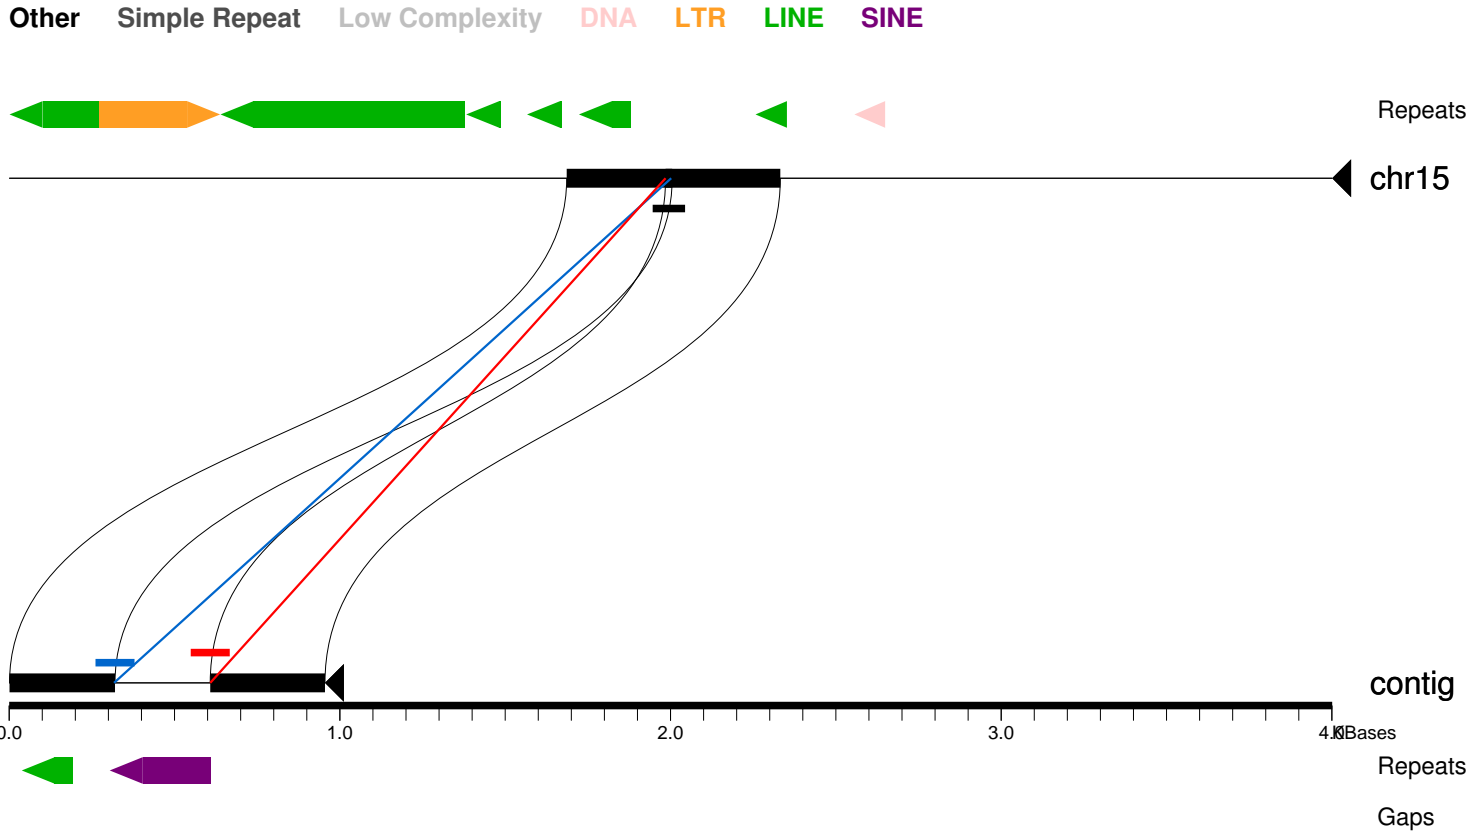

**siteID: chr15\_39691605 Scaffig4 - Breakpoint: chr15:39691591**  
**chr15:39691546-39691650**  
**Overlap Length: 15 INS size: 292 Genotyped: Yes**

left      TCACTCCCTCAGGACCCTCCTCCAAG-----TGGAAACTAACTTATTTTTAAATGTCTGT  
chrom     TCACTCCCTCAGGACCCTCCTCCAAG-----TGGAAACTAACTTATTTTTAAATGTCTGT  
right     TCTCAAAAAAAAAAAAAAAAAAATAAAAAATAAAAAATAAAAAAAAAAAAAAAAAAAAAAAAAAATTAATGTCTGT  
         \*\*1\*1111111\*11\*1111111\*111\*\*1111111111111111\*11\*\*\*11\*111\*1111\*\*\*\*\*

left      GTTCG--GCCGAGGCGGGCGGATCACGAGGTCAGGAGATCGAGACCATCCTGGCTAACACGGTGA  
chrom     GTTCCTGTCAATGCAGGCAGA---CATTTTAAGGAGA-----CTT--TAG---ACACTATG--  
right     GTTCCTGTCAATGCAGGCAGA---CATTTTAAGGAGA-----CTT--TAG---ACACTATG--  
         \*\*\*222\*2\*2\*2\*\*2\*\*\*2\*\*222\*2222\*2\*\*\*\*\*2222222\*2\*22\*2\*222\*\*\*22\*\*2

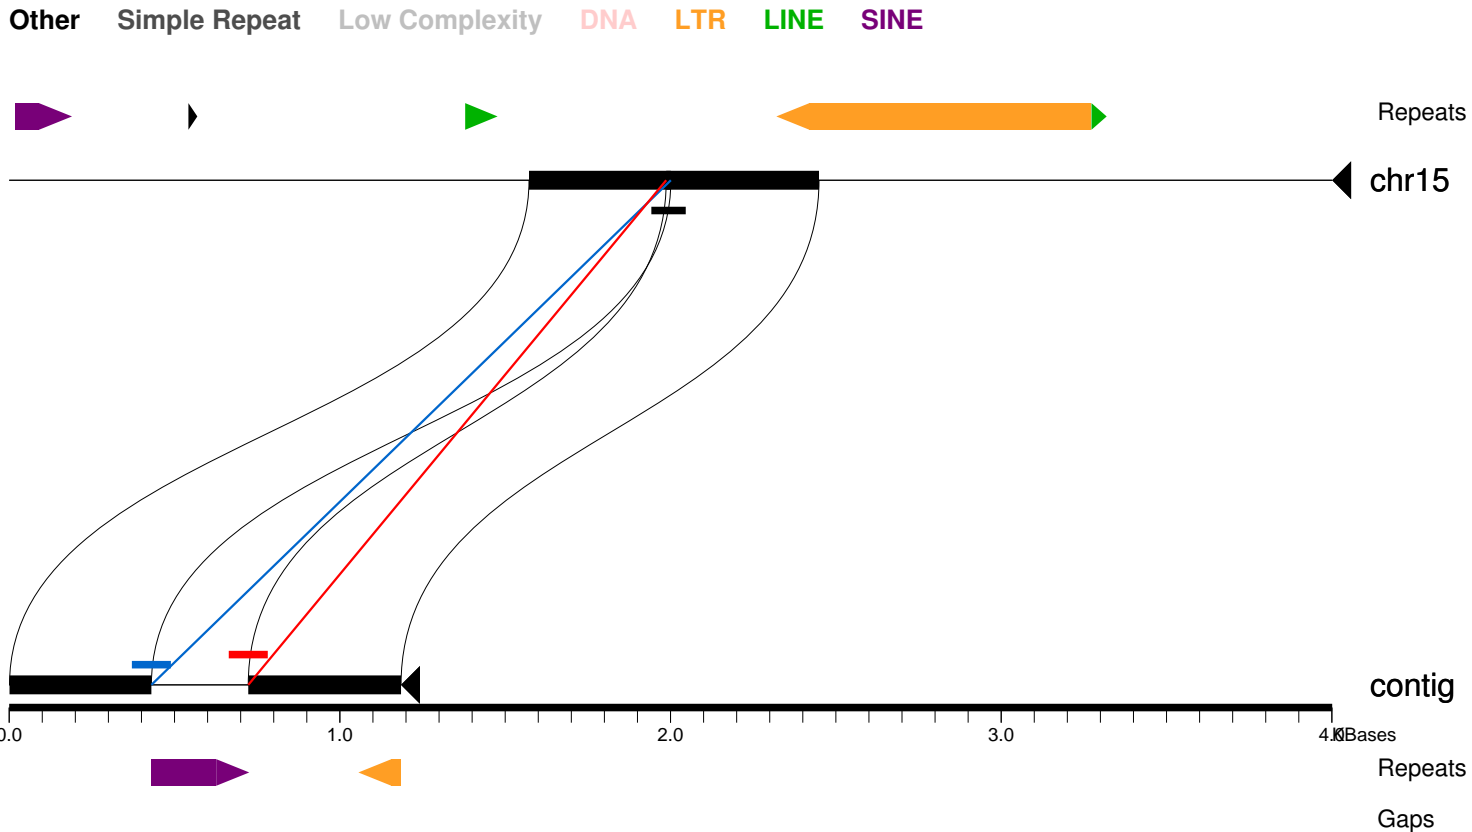



siteID: chr15\_41100317 Scaffitg1 + Breakpoint: chr15:41100319

chr15:41100159-41100491

Overlap Length: 13 INS size: 305 Genotyped: Yes

```
left      TTT-----GATGAAGTCATTTGATCCTCAGTTTCCATTTCTGTAAAAATGGGGCTAACATT
chrom     TTTCCAGCTGTGTGGTTTTTGATGAAGTCATTTGATCCTCAGTTTCCATTTCTGTAAAAATGGGGCTAACATT
right    TTTAGTAGAGACGGGGTTTCACCGTGTTAGCCAGGATG-GTCTCGATCTC-----CTGAC---
***NNNNNNN2NNN22N2221*1111**1*111*111*11**1**1**1**111111111111**1**111

left      CTCTCGCTTTCAGGGTTTATGTGAGGGTCCACTGAAGTGCTTTAGGTGAGAGTTCCCTATAAACTGTAAA
chrom     CTCTCGCTTTCAGGGTTTATGTGAGGGTCCACTGAAGTGCTTTAGGTGAGAGTTCCCTATAAACTGTAAA
right    --CTCGTGATCCGCCCGTCTC----GGCCTCCCAAAGTGCTGG-GATTACAGG-CGTGAGCCAC-----
11***111**1*1111*1*11111**1*11*11*****111*1*1*1**11*111*111**1111111

left      GCGCGCTGCCGTCGTTTTTGGCAAAGCTACTCTTTAATTTTTTTTTTTTTTTTTTTTTTGGAGACGGAGTT
chrom     GCGCGCTGCCGTCGTTTTTGC AAAAGCTACTCTT----TTCTGTCGGCCAGTGTAGCATCTGGCGG--TT
right    -CGCGC--CCGGC-----CAAAGCTACTCTT----TTCTGTCGGCCAGTGTAGCATCTGGCGG--TT
1*****11***1*11111111******2222**2*2*22222222*2*2222*22*2**22**

left      TCGCTCTGTCGCCCAGGCT-----GGAGTGCAGTGGCG-----CAATCTCG--ACTCACT-----G
chrom     TTCTTCTCTCCACCCTGCTCCTCCGAAGCGCGGTGTCCATCACACCAAGCCCGTTACTCCCTCTGCTCTG
right    TTCTTCTCTCCACCCTGCTCCTCCGAAGCGCGGTGTCCATCACACCAAGCCCGTTACTCCCTCTGCTCTG
*222***2*22**22***22222*2**2**2***2*22222222***2*2**22****2*2222222*

left      CAAGCTCCGCCTCCCGGGTTCATGCCATTCTCCTG-----CCT
chrom     AAATCTTCCCATCCCAGCAGCCTGCCCTTCTCCAGGTGCGTGGAGTTAGATTACCACAC
right    AAATCTTCCCATCCCAGCAGCCTGCCCTTCTCCAGGTGCGTGGAGTT-----
2**2**2*2**22**2*222*2****2*****2*22222222222                1NN
```

Other Simple Repeat Low Complexity DNA LTR LINE SINE

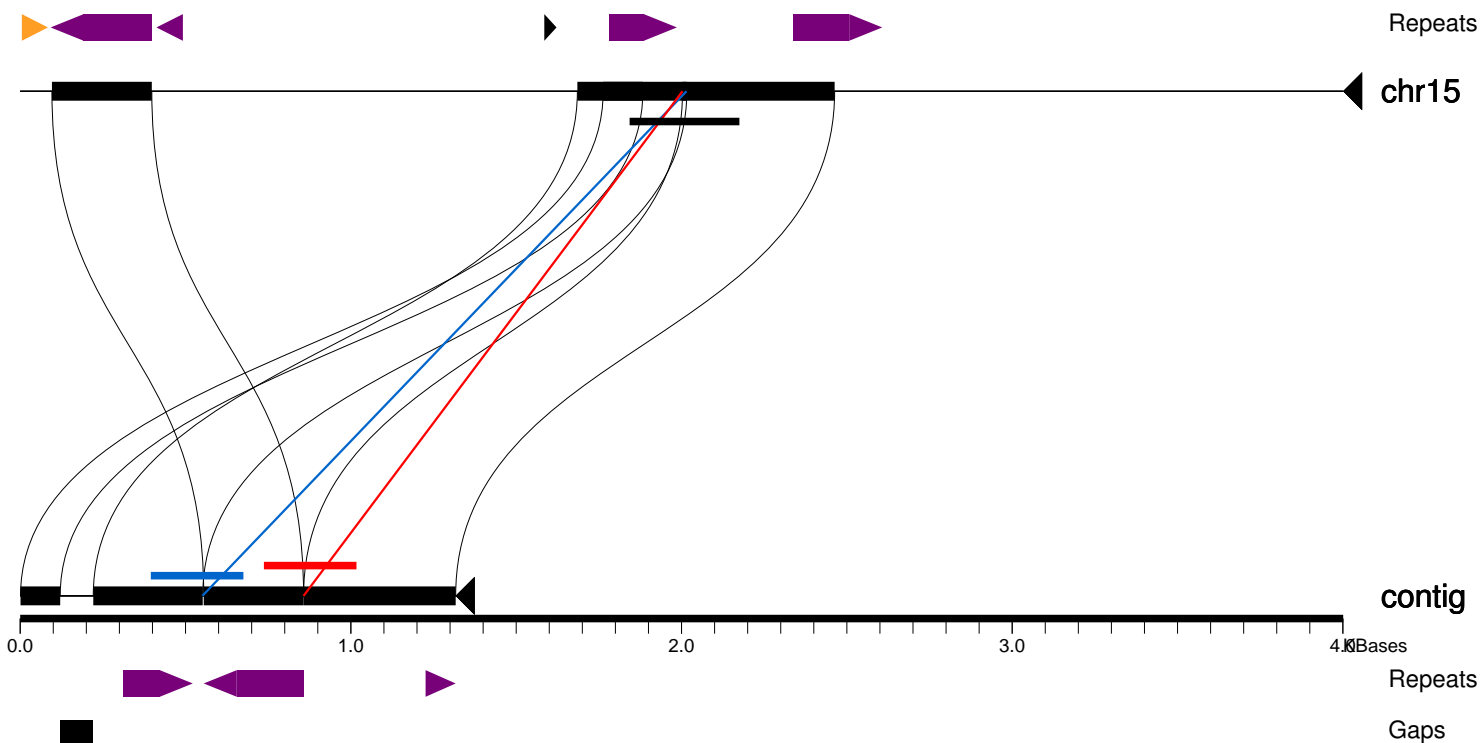



siteID: chr15\_48318839 Scaffoldig1 - Breakpoint: chr15:48318845

chr15:48318731-48319053

Overlap Length: 96 INS size: 369 Genotyped: No

```

left  -----
chrom AATGAAGTCCAAACCACCCCAAGCTCATAGAGATTTGGCATATTCTAGATATCCCAAGGAAGATGATA
right TTTTA-GTAGAGAC-----GGGGTTT--CA---CCTTGTTAGCC-----AGGATGGTC
NN2N2 22NN2N22                2N2N222  22    222N2N22N22    2N2222N2N
    
```

```

left  -----TTAAATACACCATAGTATCATGGTCTTTCTGATACATGA
chrom T-GATCATTCACAAACCCTTGGTTCCAGACTTTAAATACACCATAGTATCATGGTCTTTCTGATACATGA
right TCGATC-----TCCTGACCTCAA-----GTATCATGGTCTTTCTGATACATGA
212222                222N222N*1**11111111111*****
    
```

```

left  TCAATATCTACAACCCGATGAAACATACACACACACTTTTCTCTTGTCTTCTTGCAAAAAGAAGAACAG
chrom TCAATATCTACAACCCGATGAAACATACACACACACTTTTCTCTTGTCTTCTTGCAAAAAGAAGAACAG
right TCAATATCTACAACCCGATGAAACATACACACACACTTTTCTCTTGTCTTCTTGCAAAAAGAAGAACAG
*****
    
```

```

left  GNNNNNNNNNNNNNNNNNNNNNNNNNNNNNNNNNNNNNNNNNNNNNNNNNNNNNNNNNNNNNNNNNNNNNNNN
chrom GACCACGCAGGTTATGAAACTAATGAGAGTTTCTCCCATTCCCAGGATCCCCATTTTAAATCTGAGCATC
right GACCACGCAGGTTA-----
*222222222222NNNNNNNNNNNNNNNNNNNNNNNNNNNNNNNNNNNNNNNNNNNNNNNNNNNNNNNNNN
    
```

```

left  -----
chrom CCATGAACAGACGGGATCCTCTACATACCAGTATGTGACACCCA
right -----
    
```

Other Simple Repeat Low Complexity DNA LTR LINE SINE

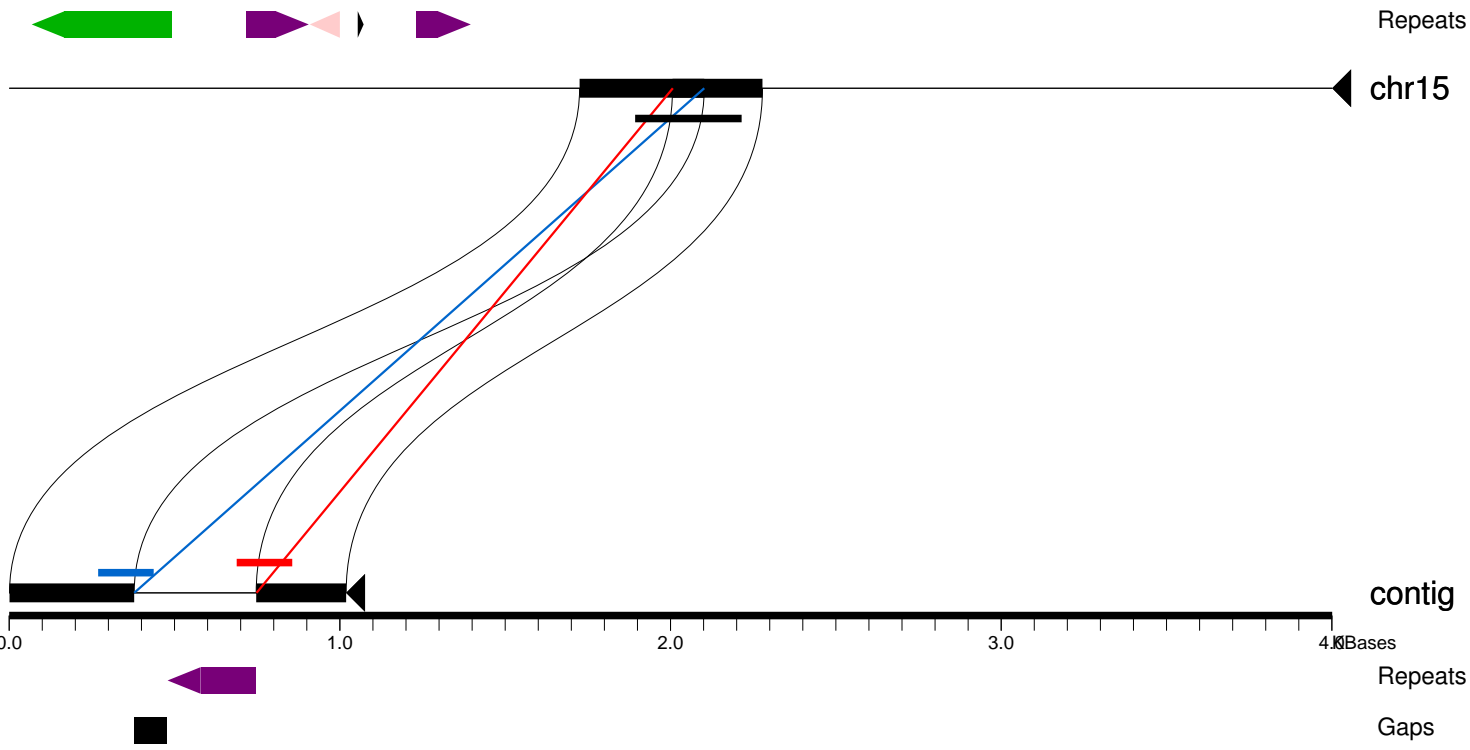



siteID: chr15\_49609595 Scaffitg1 + Breakpoint: chr15:49609591

chr15:49609545-49609650

Overlap Length: 14 INS size: 415 Genotyped: No

```
left  ACCACAATGAGATACCATCTCACACCAGTTAGAAAGGCGGTTATTA-----AAAAGTCAGGA
chrom ACCACAATGAGATACCATCTCACACCAGTTAGAAAGGCGGTTATTA-----AAAAGTCAGGA
right NNNNNNNNNNNNNNNNNNNNNNNNNNNNNNNNNNNNNNNNNNNNNNNNNNNNNNNNNNNNNNNNAAAAGTCAGGA
      1111111111111111111111111111111111111111111111111111111111111111111111*
```

```
left  AGCGGCCG--GGCGCGGTGGCTCACGCCGTGTAATCCCAGCACTTTGGGAGGCCGAGGCGGGCCGG
chrom AGCAATAGATGCTGGAGAGGATGTGG--AGAAATAGGAATGCTTTTACACT-----
right AGCAATAGATGCTGGAGAGGATGTGG--AGAAATAGGAATGCTTTTACACT-----
      **2222*22*22*22*2**2*222*222*2***222*222***222*2222222222222222
```

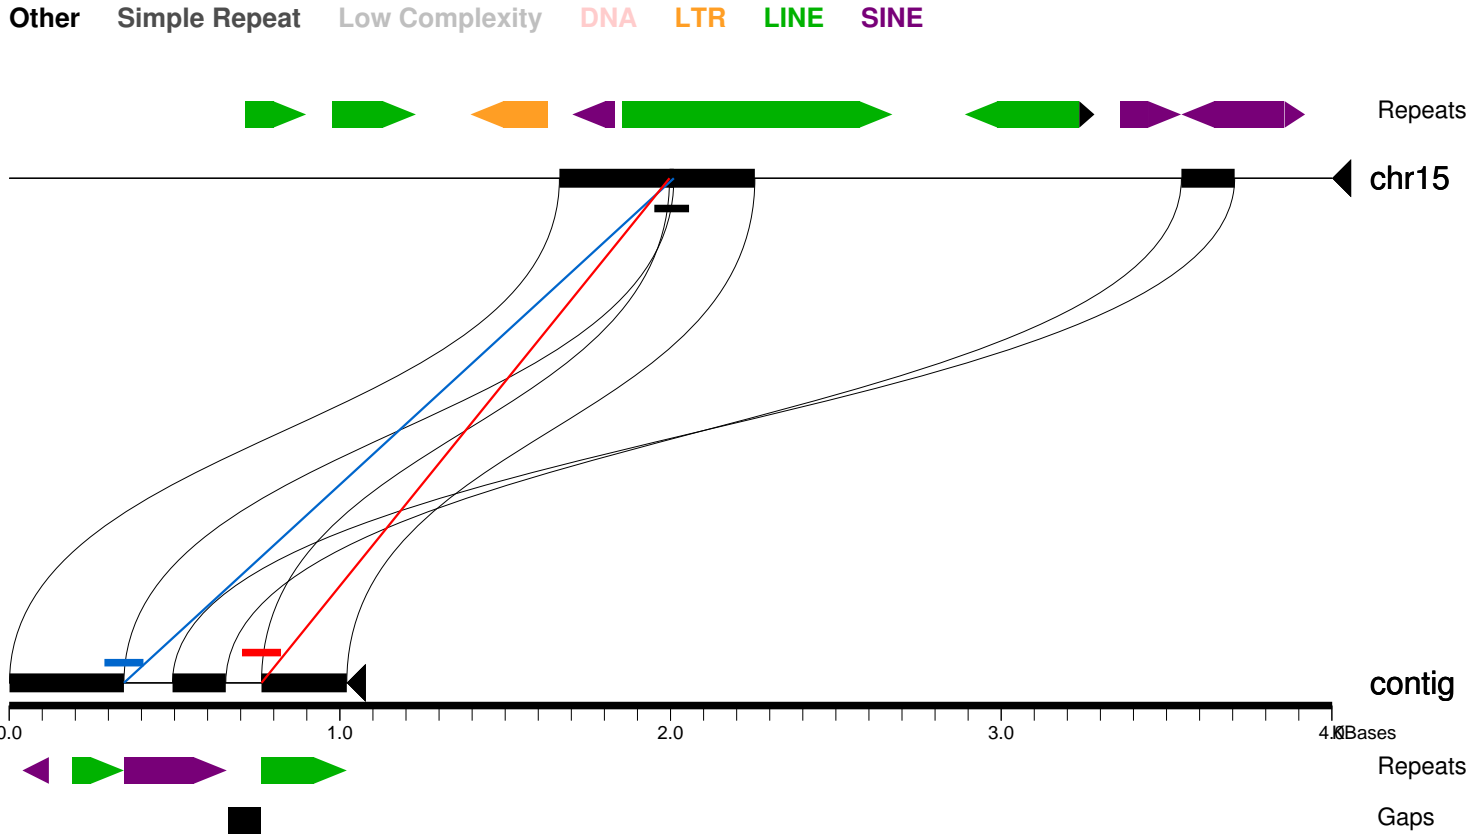

siteID: chr15\_52649008 Scaffitg1 - Breakpoint: chr15:52648982

chr15:52648925-52649070

Overlap Length: 3 INS size: 436 Genotyped: No

```
left  AAAAAAAAAAATTAGCTCAGTTAATAGACCAAAAAGTGGCACTCCCCTGTTGATTTAATTNNNNNNNNNN
chrom AAAAAAAAAAATTAGCTCAGTTAATAGACCAAAAAGTGGCACTTCGCTGTTGATTTAATTTGCATTTCTTT
right GGA-----TTACAGGC---ATGAGCCACTGCGCC--TGGCCTTCTTTGACTTTTGAT
      11*11111111111111111111*1*1**1*111*1*1*1***N*2*111**111*11**2NN222NNN2
```

```
left  NNNNNNNNNNNNNNNNNNNNNNNNNNNNNNNNNNNNNNNNNNNNNNNNNNNNNNNNNNNNNNNNNNNNNNN
chrom GACTTTTTTTTTTTTTTTTTTTTTTTTTTATTTTCAGGAATTGTATATTAATTAGCTACCTTTGGTCTTTTCATGAATT
right GAGATTGAATAAATTTTT----ATTTTCAGGAATTGTATATTAATTAGCTACCTTTGGTCTTTTCATGAATT
      22NN22NNN2NN22222NNNN22222222222222222222222222222222222222222222222222222222
```

```
left  -----
chrom CAGAGT
right CAGAGT
      222222
```

Other Simple Repeat Low Complexity DNA LTR LINE SINE

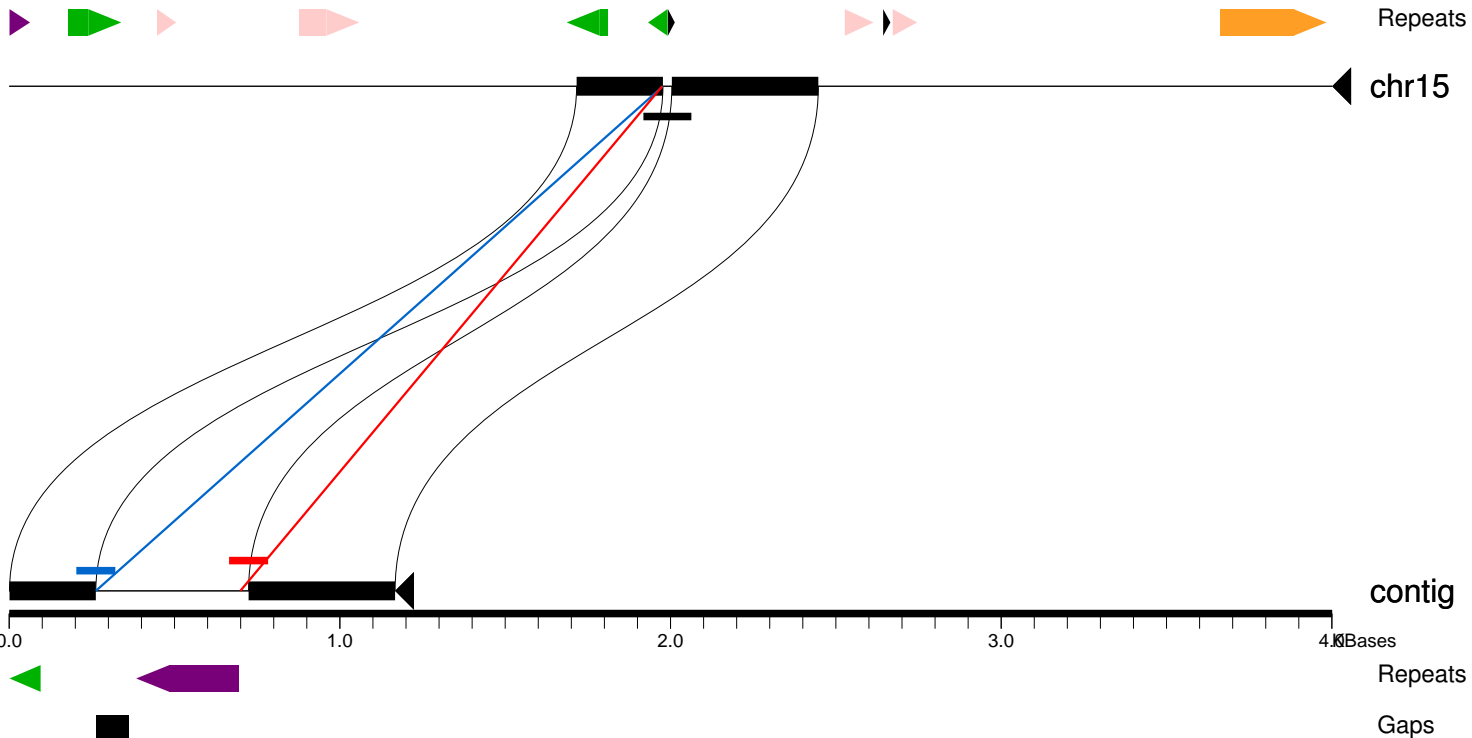

siteID: chr15\_53453641 Scafftig2 - Breakpoint: chr15:53453612

chr15:53453567-53453671

Overlap Length: 15 INS size: 323 Genotyped: Yes

```
left  TCTCTTTC-TCTTTCTTTCT-----CTG-----CATGTGTGTGTGTTTTAGA--GGAAAAGAGCTGGCC
chrom TCTCTTTC-TCTTTCTTTCT-----CTG-----CATGTGTGTGTGTTTTAGA--GGAAAAGAGCTGGCC
right CCGCCCCGCTCGGCCTTCCAAAGTGCTGGGATTACAGGCGTGAGCCACCGCGCCCGGCCAAGAGCTGGCC
      1*1*111*1**111***1*111111***111111**1*1***1*111111*111**11*****
```

```
left  TCTTTTTTTTTTTTTTTTTTTTTTTTTTTTTTTTTTTTTTTTTTTTTTTTTTTTTGAGACGGAGTCTCGCTC
chrom TCTTAAGGCTAGGCTACAGGAACTGACTCATGGCCATTTTGGTTT-----CTTG---
right TCTTAAGGCTAGGCTACAGGAACTGACTCATGGCCATTTTGGTTT-----CTTG---
      ***22222*2222*22222222*222*22*22222***22***2222222222**2*222
```

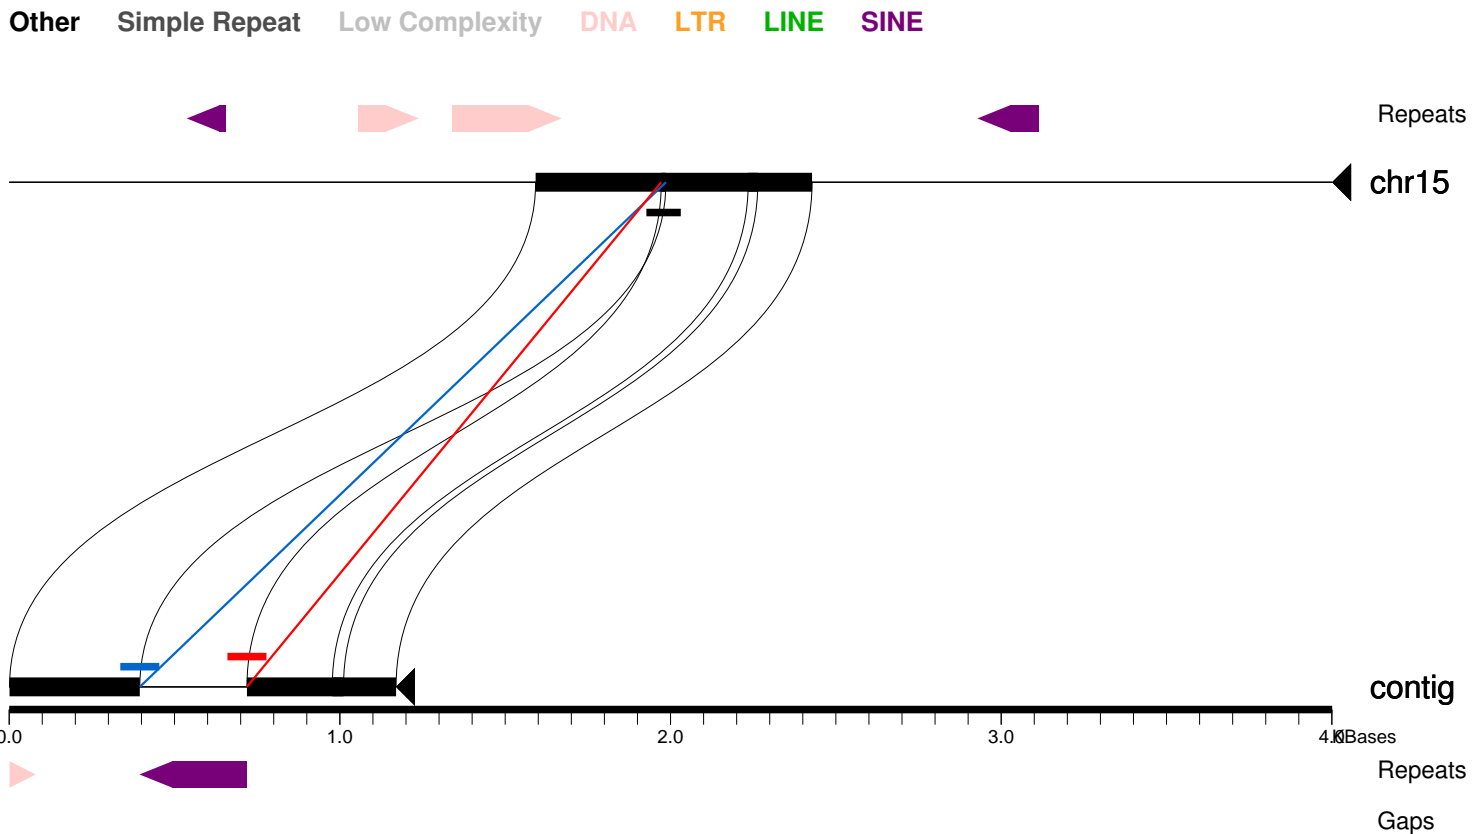

siteID: chr15\_54188207 Scaffoldig3 - Breakpoint: chr15:54188208

chr15:54188161-54188267

Overlap Length: 13 INS size: 334 Genotyped: Yes

```

left    ATTCCTCTTTCTTCAGAGCTCTGCCAACATTTTATTTGATTTT-----TACTTTAAAAATGCATC
chrom   ATTCCTCTTTCTTCAGAGCTCTGCCAACATTTTATTTGATTTT-----TACTTTAAAAATGCATC
right   CGTCTCAAAAAAAAAAAAAAAAAAAAAAAAAAAAAAAAAAATAAAATAAAAATAAAATAAAATAAAAA
11****1111111*1*11111111*1*1111*1*11*1*11111111111111**111*****

```

```

left    TCGGCCGGGCGCGGTGGCTCACGCCTGTAATCCCAGCACTTTGGGAGGCCGAGGCGGGCGG
chrom   TCAAACAAA-----ATGATAATAAAAAACAACACATGAATTTAAATATGCTAATG-
right   TCAAACAAA-----ATGATAATAAAAAACAACACATGAATTTAAATATGCTAATG-
**222*22222222222222*2*2222***222*2***2*2222222222*2**2222*2

```

Other    Simple Repeat    Low Complexity    DNA    LTR    LINE    SINE

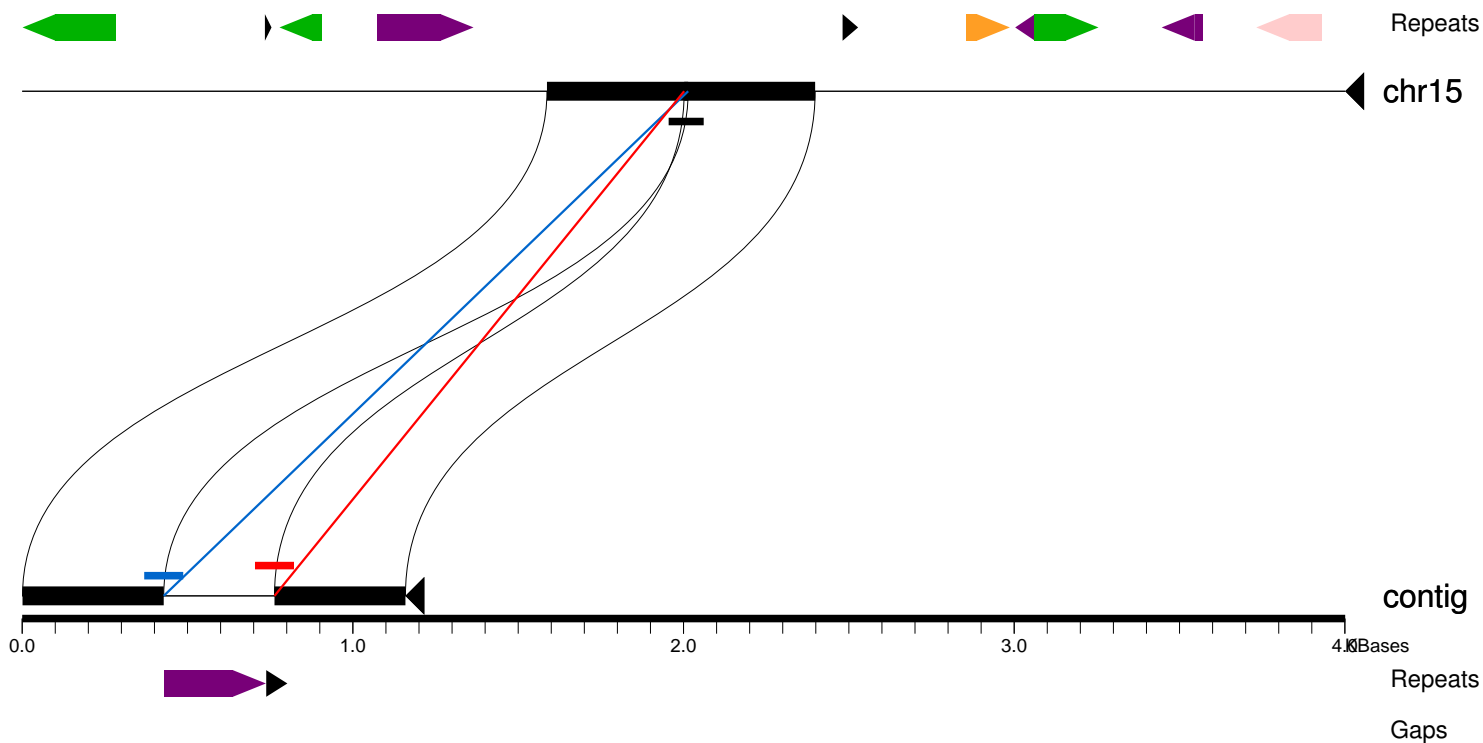

siteID: chr15\_54248784 Scaffitig5 - Breakpoint: chr15:54248771

chr15:54248725-54248830

Overlap Length: 14 INS size: 314 Genotyped: Yes

```
left  AAA-----ACAGAGAGGTAAAGAGGTTTAGGGTATAGCAAGAGTGGTACTT---AGAACTGAAGC
chrom AAA-----ACAGAGAGGTAAAGAGGTTTAGGGTATAGCAAGAGTGGTACTT---AGAACAGAAGC
right TCCGGCCTGGGCGACAGAGCGAGACTCCGTCTCAAAAAAAAAAAAAAAAAAAAAAAAAAAAAAAGAAGCTGAAGC
      11111111111111111111*****1*11*1111*11*1*1111*1*11**1*111N1*1111111*1111111*****N*****

left  TTCGGCCGGGCGCG-GTGGCTCACGCCGTGTAATCCCAGCACTTTGGGAGGCCGAGGCGGGTGG
chrom TTCATAAGTTAGCAAGTGAAAAAGG---GAGAAGCTTGATGATTGGAATAAA-----
right TTCATAAGTTAGCAAGTGAAAAAGG---GAGAAGCTTGATGATTGGAATAAA-----
      **2222*222**22***2222*2*222*22*22*22*2222****2*2222222222222222
```

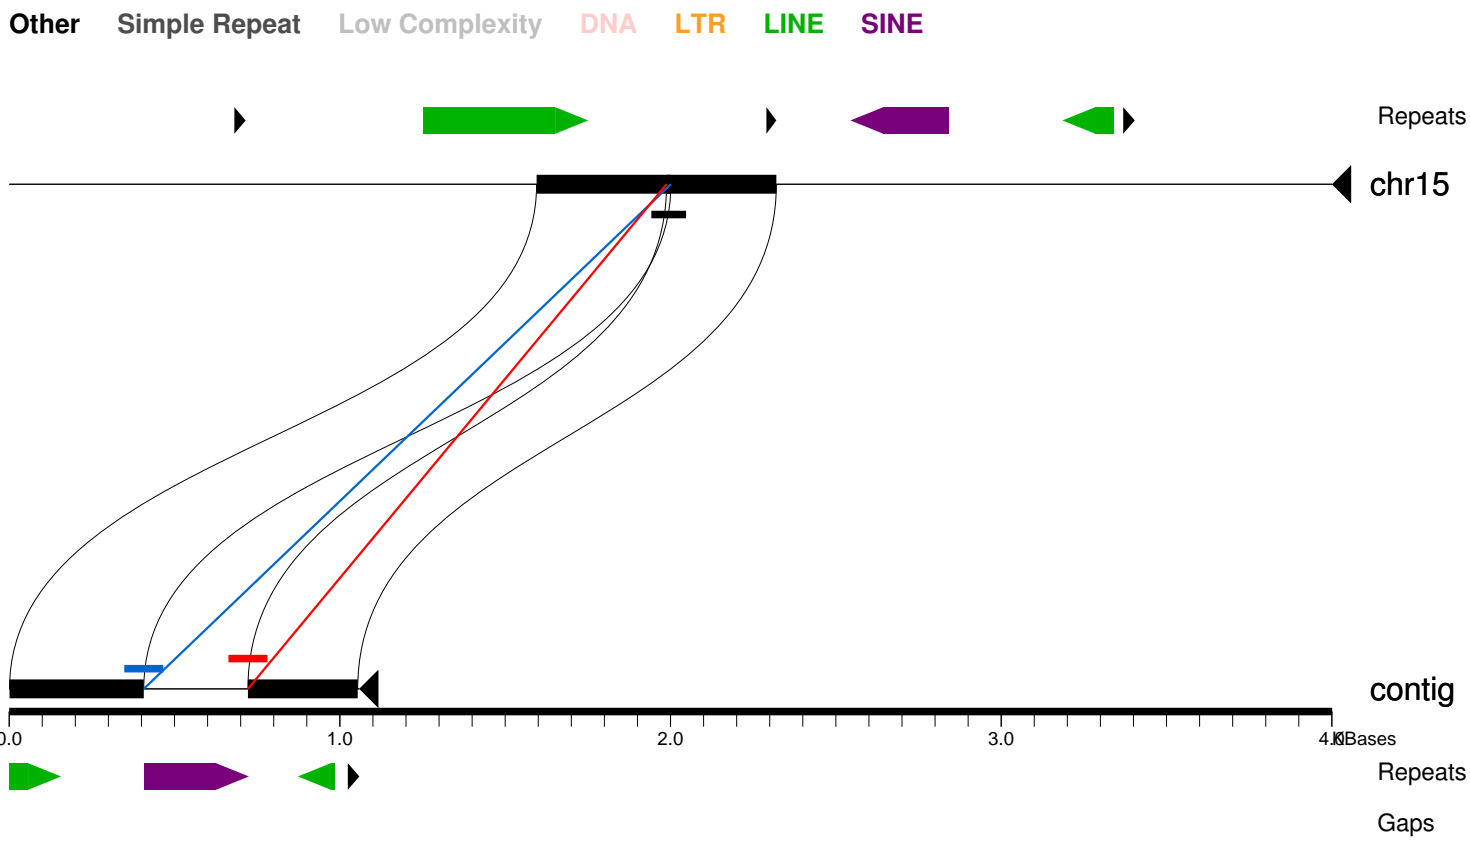

siteID: chr15\_54376450 Scaffitig1 + Breakpoint: chr15:54376442

chr15:54376387-54376501

Overlap Length: 5 INS size: 342 Genotyped: No

```
left   TCTCTTGAGAGCCCGTCCATTCACAGTAACTGTGATC-CA--CGT----CCCCTTTTTTCTTCAGTTNNN
chrom  TCTCTTGAGAGCCCGTCCATTCACAGTAACTGTGATC-CA--CGT----CCCCTTTTTTCTTCAGTTCTG
right  TC-CACCCGC-CTCGGCCTCCCAAAGTG-CTGGGATTACAGGCGTGAGCCACCGCGCCCGGCAGTTCTG
      **1*1111*11*1**1**111**1***11***1***11**11***1111*1**1111111111*****222
```

```
left   NNNNNNNNNNNNNNNNNNNNNNNNNNNNNNNNNNNNNNNNNNNNNNNNNNNNNNNNNNNNNNNNNNNNNNNNN
chrom  TACTCTTTCTACTCTCTTTCTATTGGGTCAGTTGGATTTAAGTTCCTCGTGTA----
right  TACTCTTTCTACTCTCTTTCTATTGGGTCAGTTGGATTTAAGTTCCTCGTGTA----
      22222222222222222222222222222222222222222222222222222222222222222222
```

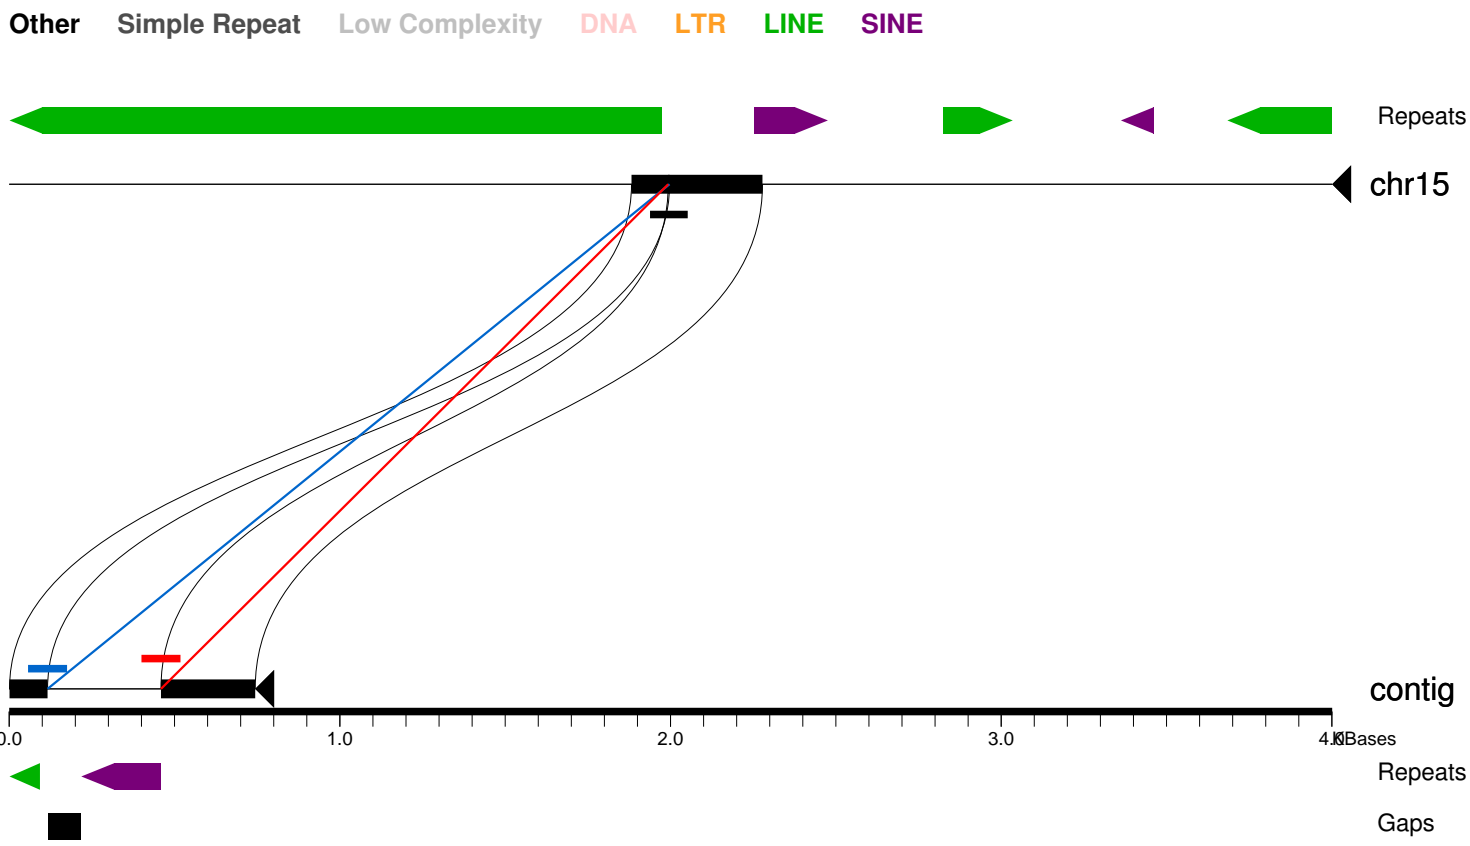







siteID: chr15\_55213469 Scaffoldig1 + Breakpoint: chr15:55213439  
 chr15:55213386-55213498  
 Overlap Length: 7 INS size: 407 Genotyped: No

```

left  CTGTGTTTCTCTAGTTCTT----TGAGGTGTGATCTTAGACTGTCTATTTCTGTTCCTT----TCAGACTNN
chrom CTTGTTTTCTCTAGTTCTT----TGAGGTGTGATCTTAGACTGTCTATTTCTGTTCCTT----TCAGACTTT
right CCGCCCAC-CTCGGCCTCCCAAAGTGCTGGGATTACAGGC-GTGAGCCACCGCGCCCGGCCTCAGACTTT
      *111111*1**1*11**111111*1*1**1***111**1*1**111111*1*11*111111******22

left  NNNNNNNNNNNNNNNNNNNNNNNNNNNNNNNNNNNNNNNNNNNNNNNNNNNNNNNNNNNNNNNNNNNNNNN
chrom TTGATGTAGGCATTTAATGCTATGAGCTTTCCTCTTAGCACTGCTTTTGCT-----
right TTGATGTAGGCATTTAATGCTATGAGCTTTCCTCTTAGCACTGCTTTTGCT-----
      222222222222222222222222222222222222222222222222222222222222N222222222222
  
```

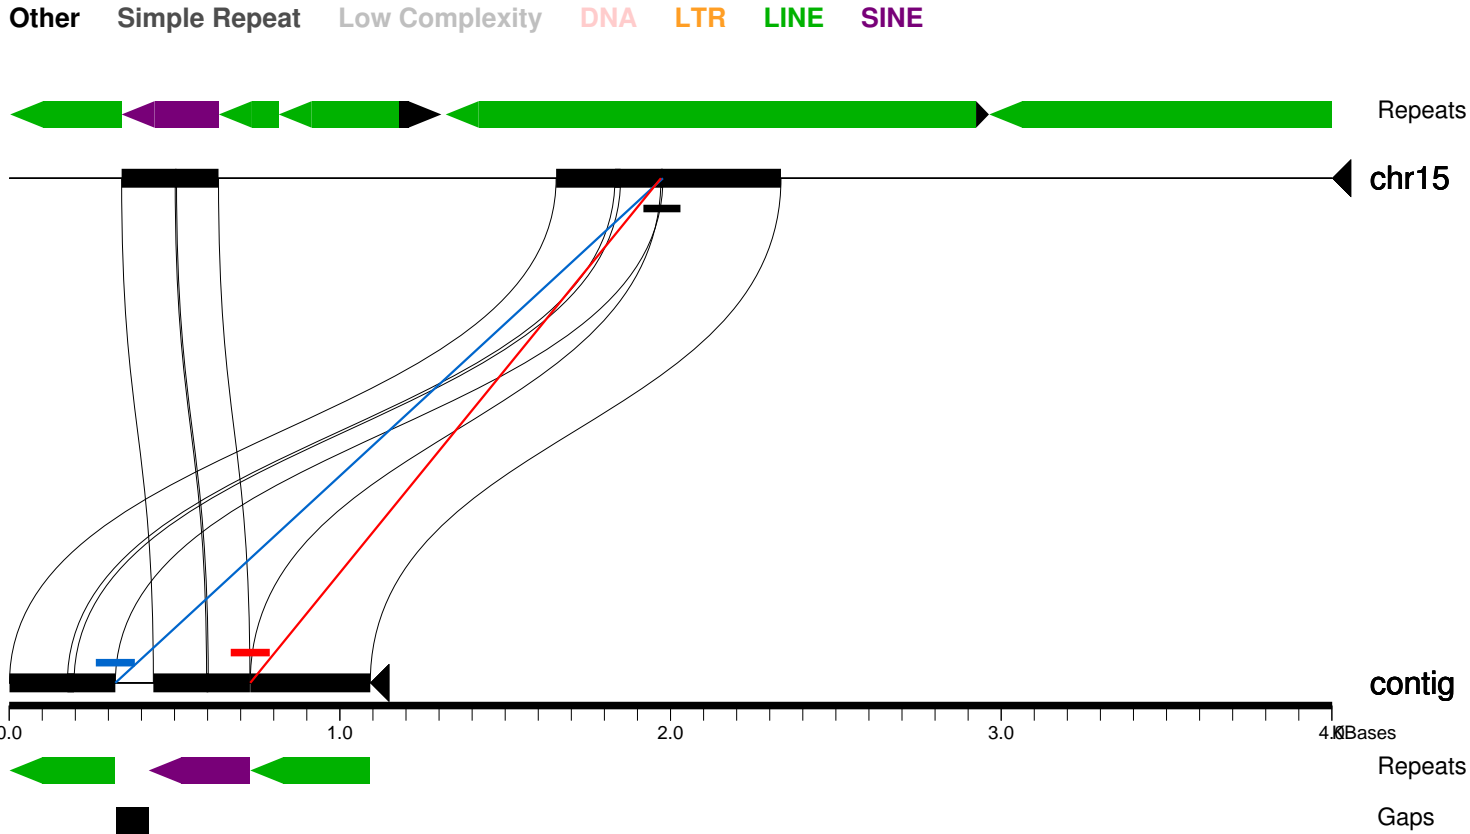

siteID: chr15\_55228586 Scaffitg1 - Breakpoint: chr15:55228567

chr15:55228518-55228622

Overlap Length: 11 INS size: 302 Genotyped: Yes

```
left  CA-----TCCAT-----GTAACCAAACACCATTTTTGCCCCCTAAAGCCATTGATTAAAA--CACTAAT
chrom CA-----TCCAT-----GTAACCAAACACCATTTTTGCCCCCTAAAGCCATTGATTAAAA--CACTAAT
right CCACTGCACCTCCAGCCTGGGCGACAGAGCGAGACTCCCGTCTCAAAAAAAAAAAAAAAAAAAAAATCACTAAT
      *111111111****1111111*11**11*1*111*1*1111*1*11**111*111*11****11*****
```

  

```
left  TTTTGGCCGGGCGCGGTGGCTCACGCCTGTAATCCCAGCACTTTGGGAGGCCGAGGCGGGCGG
chrom TTTTAA---GTCAAGCTGGATTAT-----ATAGAAGAACTA---GAAATAAAAAACACAAC-
right TTTTAA---GTCAAGCTGGATTAT-----ATAGAAGAACTA---GAAATAAAAAACACAAC-
      ***22222*2*22*2***2*2*22222222**222*2***2222*22222*22*222222
```

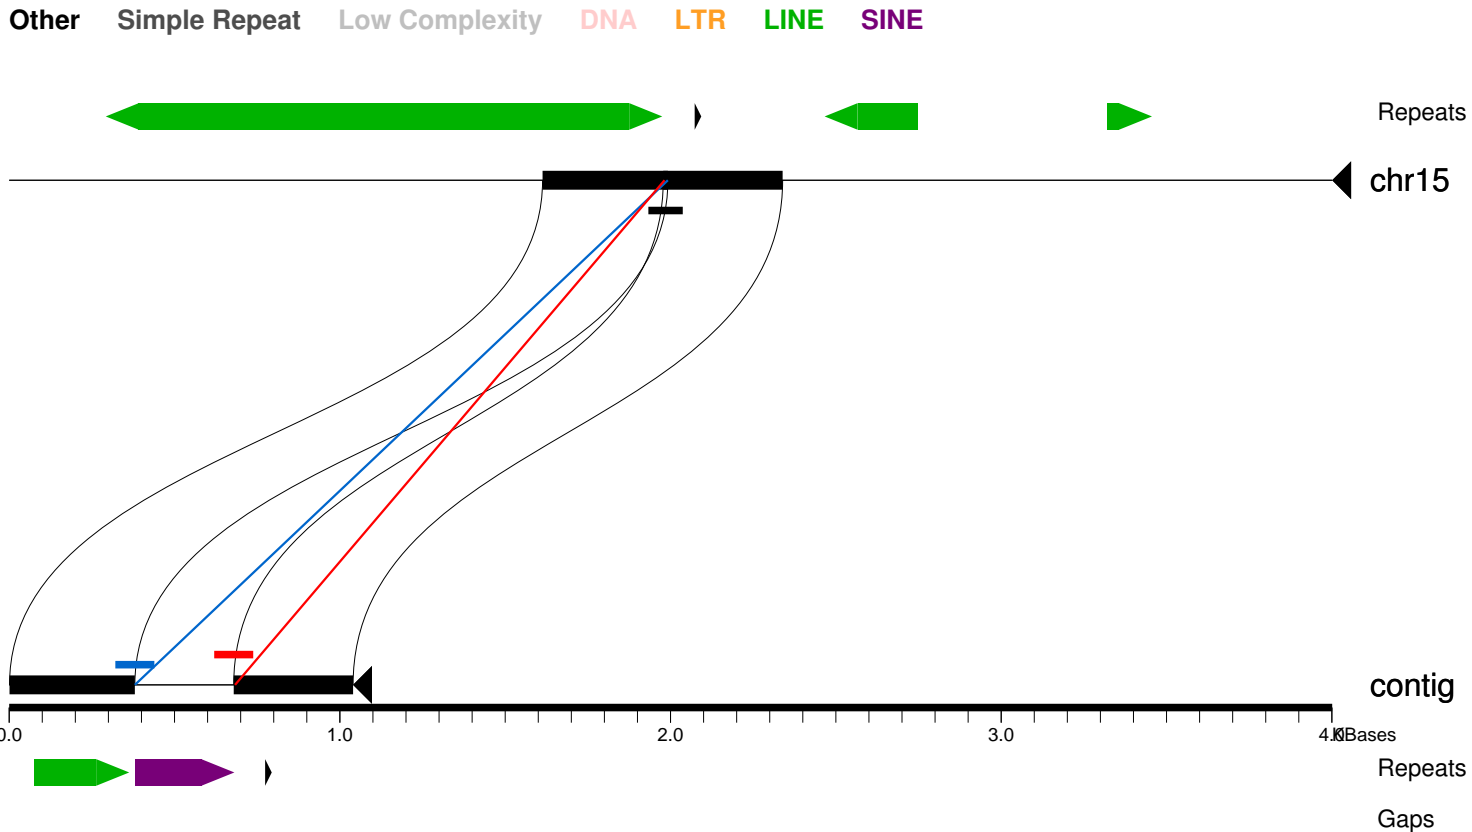

siteID: chr15\_57380187 Scafftig1 - Breakpoint: chr15:57380190

chr15:57380029-57380363

Overlap Length: 14 INS size: 314 Genotyped: Yes

left GG-----TGTAATAGATAAATCTGATAGTATTTGCTCTGTCCTTCATAATGTATGTCATCTCAT  
chrom GGCTAAAAGGCTGGTGTAAATAGATAAATCTGATAGTATTTGCTCTGTCCTTCATAATGTATGTCATCTCAT  
right TTTAGTAGAGACGGGGTTTCACCTTGTTA-GCCAGGATGG---TCTCGATC-TCCTG-----ACCTCAT  
11NNNN2NN2NN221\*\*111\*11\*11\*\*11\*11\*\*1\*\*1\*111\*1\*\*11\*\*1\*11\*\*111111\*1\*\*\*\*\*

left GTATTAATAAATCTCGTTTATCTTAGTTGCTATTAACAGAAATCAAGATCTTAATTAGGAGTCTTGGGAG  
chrom GTATTAATAAATCTCGTTTATCTTAGTTGCTATTAACAGAAATCAAGATCTTAATTAGGAGTCTTGGGAG  
right G-ATCCACCCGCTCGGCCTCCCAAAGTGCTG-----GGATTACAGGCGT-----GAG-CCACCGCG  
\*1\*\*11\*111111\*\*\*\*111111\*11\*11\*\*\*\*11111111\*1\*\*\*11\*\*111\*11111111\*\*\*\*1\*\*111\*1\*

left CCATGTTTGACCCCTTTTATTAGCATAGTAACTTTT-----TTTTTTTTTT-----TTTTTTTTTT  
chrom CCATGTTTGACCCCTTTTATTAGCATAGTAACTTTCTATCAATTTGAAATATGCAGCATGATCATTGTAT  
right CCGG-----CCT-----AGCATAGTAACTTTCTATCAATTTGAAATATGCAGCATGATCATTGTAT  
\*\*11\*11111111\*\*11111111\*\*\*\*\*2\*2\*222\*\*\*2222222222222222\*22\*\*2\*2\*

left TTTT-----TGAGACGGAGT--CTCGCTCTGTCGCCAGGCCGGACTGCGGA-----CTG----CAG  
chrom ATTTAATGATGTCAGTACTGATTTACTTCCCTTTATATTTTAAAAATTGAAATAGCATTTCATTTACTGGTCCCAT  
right ATTTAATGATGTCAGTACTGATTTACTTCCCTTTATATTTTAAAAATTGAAATAGCATTTCATTTACTGGTCCCAT  
2\*\*\*22222\*\*22\*\*2\*\*2\*22\*\*22\*\*2\*2\*22222\*22222\*\*2222\*2\*22222222\*\*\*2222\*\*2

left TGGTGCAATCTC---GGCTC--ACTGCAAGCTCCGCTTCCCGGGTTCACGCCA---  
chrom TGGTTGATCCACTCGGGCTCCAACCTT-AACCATTGTTTGGCTTGGTTTTTTGTTCTTT  
right TGGTTGATCCACTCGGGCTCCAACCTT-AACCATTGTTTGGCT-----  
\*\*\*22\*22\*2\*222\*\*\*\*\*22\*\*22\*2\*222\*2\*\*2\*2N1111NNN1NNN

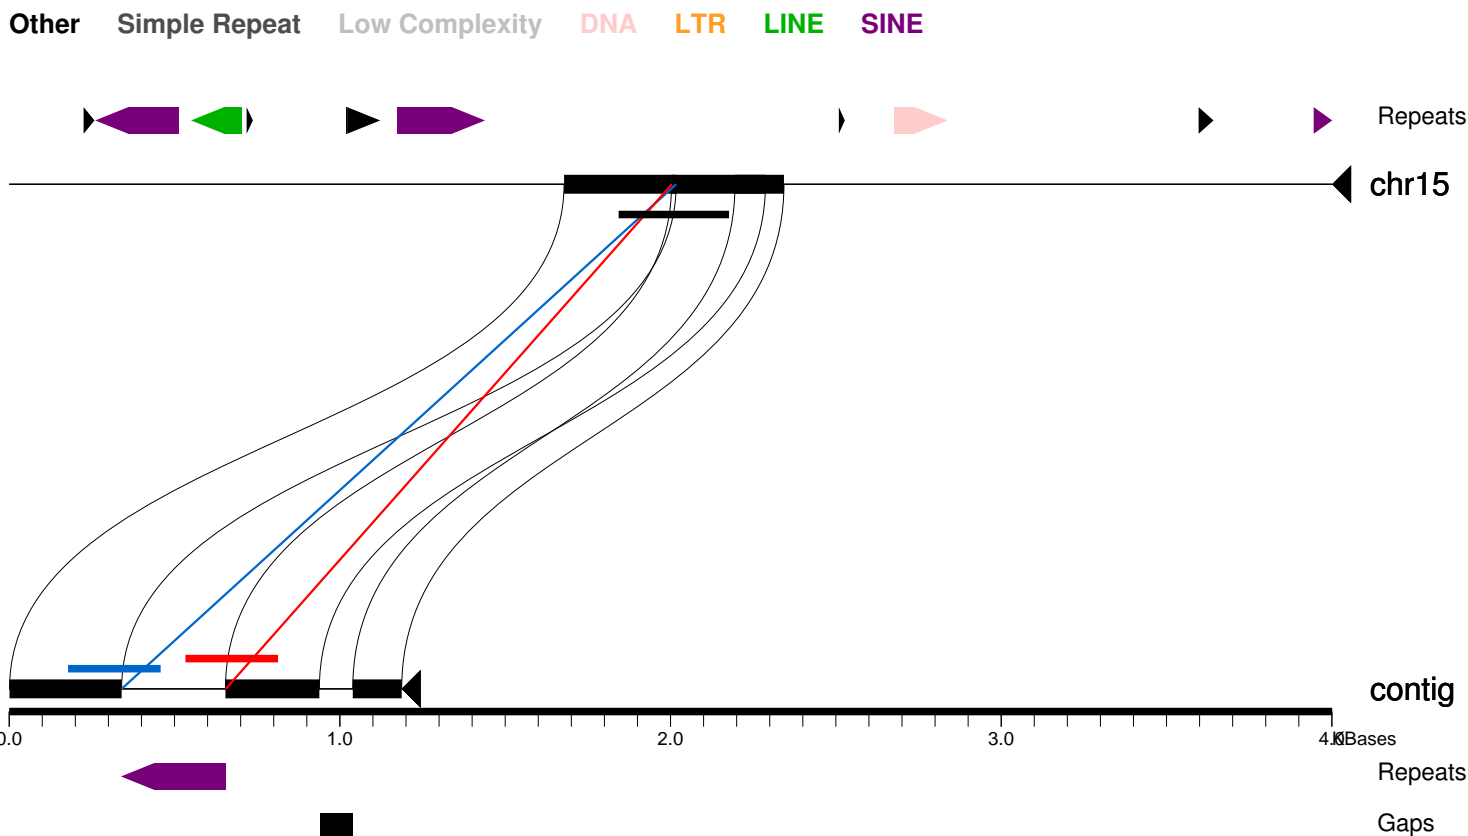

siteID: chr15\_60657255 Scafftig1 + Breakpoint: chr15:60657244  
 chr15:60657200-60657303  
 Overlap Length: 16 INS size: 436 Genotyped: No

```

left -----CTATAATTATAAAA--ACTGTCATGACAA--ATGAGTCA--GATTTAATATGGCAGGTGTA
chrom -----CTATAATTATAAAA--ACTGTCATGACAA--ATGAGTCA--GATTTAACACGGCAGTTGTA
right TCCGCCCGCCTCGGCCTCCCAAAGTGCTGGGATTACAGGCGTGAGCCACCGCGCCCGGC GG CAGTTGTA
      1111111111**11111*111***111***11**1***1111****1**11*111111N12*****2****

left TTTTNNNNNNNNNNNNNNNNNNNNNNNNNNNNNNNNNNNNNNNNNNNNNNNNNNNNNNNNNNNNNNNN
chrom TTTTAAATAGCATAATTGATTAACACAATCACACTTATTGAAGACAAAA-----
right TTTTAAATAGCATAATTGATTAACACAATCACACTTATTGAAGACAAAA-----
      ****22222222222222222222222222222222222222222222222222222222222222222222
  
```

Other    Simple Repeat    Low Complexity    DNA    LTR    LINE    SINE

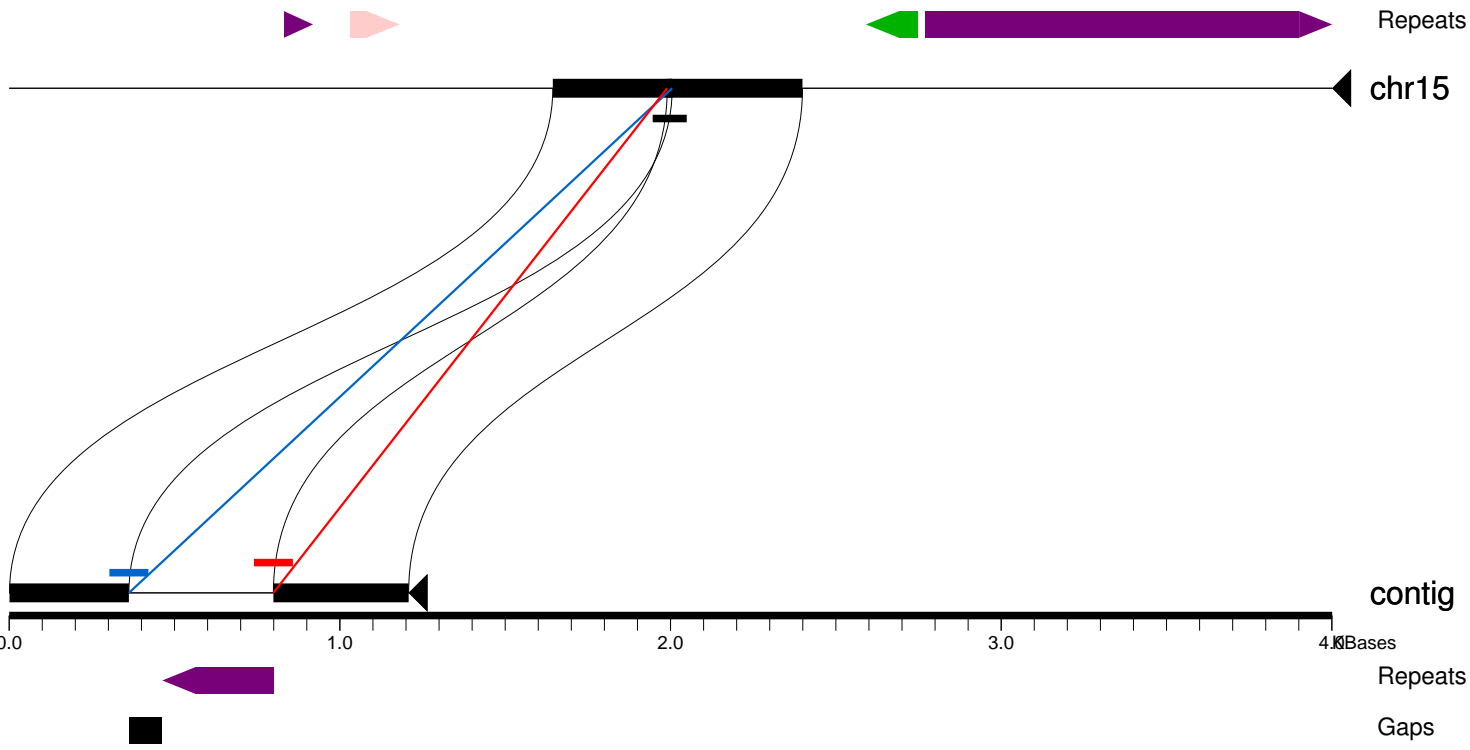

siteID: chr15\_62318266 Scafftig5 - Breakpoint: chr15:62318266

chr15:62318221-62318325

Overlap Length: 15 INS size: 313 Genotyped: Yes

```
left  AGAAGACAGTTGGATTAGCATA----TCTGCTT-CTGCCTTCAACCT-----GTTGAGATATGTTG
chrom AGAAGACAGTTGGATTAGCATA----TCTGCTT-CTGCCTTCAACCT-----GTTGAGATATGTTG
right CCGCCCGCCTCGGCCTCCCAAAGTGCTGTGATTACAGGCGTGAGCCACCGCGCCCGGCCGAGATATGTTG
      1111111111*1**11*11**1*1111*1**1**1*1*1*1*1*1**1111111111*11*****
```

```
left  TTTTFFFFTGTFTTTTTTGTFTTTTTTTTTTTTTTTGAGACGGAGTCTCGCTCTGTCGCCCAGGCT
chrom TTTTAATT-GAAGTACATGAT-----GAAAATCTGA-TCTCACTATAGATATATAA
right TTTTAATT-GAAGTACATGAT-----GAAAATCTGA-TCTCACTATAGATATATAA
      ***22**2*222*222**2*222222222222**2*2222*22**2*2**2*2*22222222
```

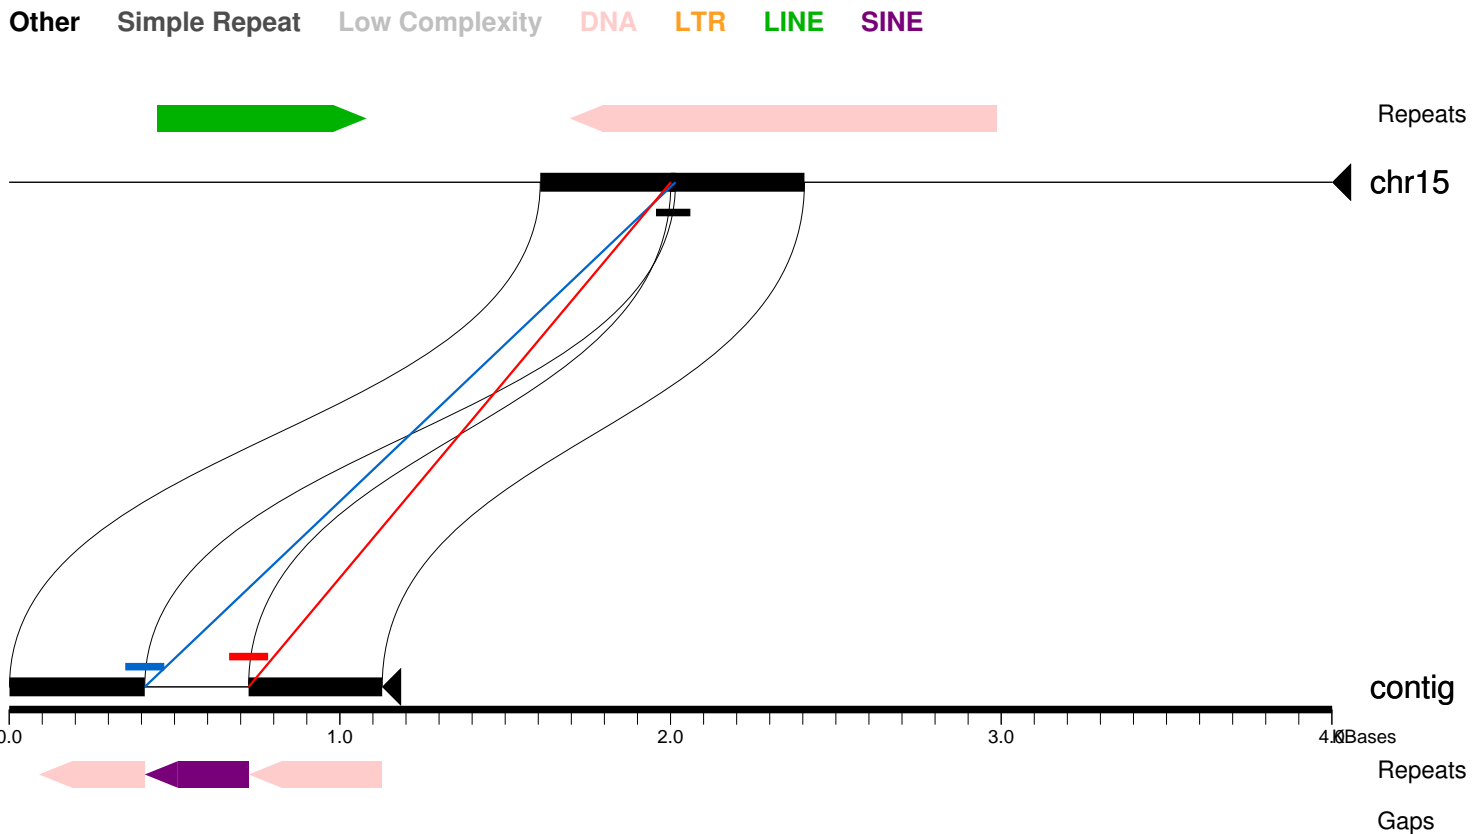

siteID: chr15\_62606057 Scafftig2 - Breakpoint: chr15:62606047

chr15:62605996-62606106

Overlap Length: 9 INS size: 352 Genotyped: No

```
left      T-----TCATGTATTGCTAGTGGGAACGCA--AAATGGTACAGCCACTGAAAAAAAAATAGTTTAGCAGNN
chrom     T-----TCATGTATTGCTAGTGGGAACGCA--AAATGGTACAGCCACTGAAAAAAAAATACTTTAGCAGAT
right    CCGCCCGCCTCGGCCTCCCAAAGTGCTGGGATTACAGGCGTGAGCCACCGCGCCCGCCGTTTAGCAGAT
          111111111*11*111*1*1*11*1*111*1*11*1*1*1111*****1*111111111******22
```

```
left      NNNNNNNNNNNNNNNNNNNNNNNNNNNNNNNNNNNNNNNNNNNNNNNNNNNNNNNNNNNNNNNNNNNNNNNNN
chrom     TCTTATAAAGTTAAGAACACATTTACTATAACAACCCAGTAGTCCCATTC-----
right    TCTTATAAAGTTAAGAACACATTTACTATAACAACCCAGTAGTCCCATTC-----
          222222222222222222222222222222222222222222222222222222222222222222
```

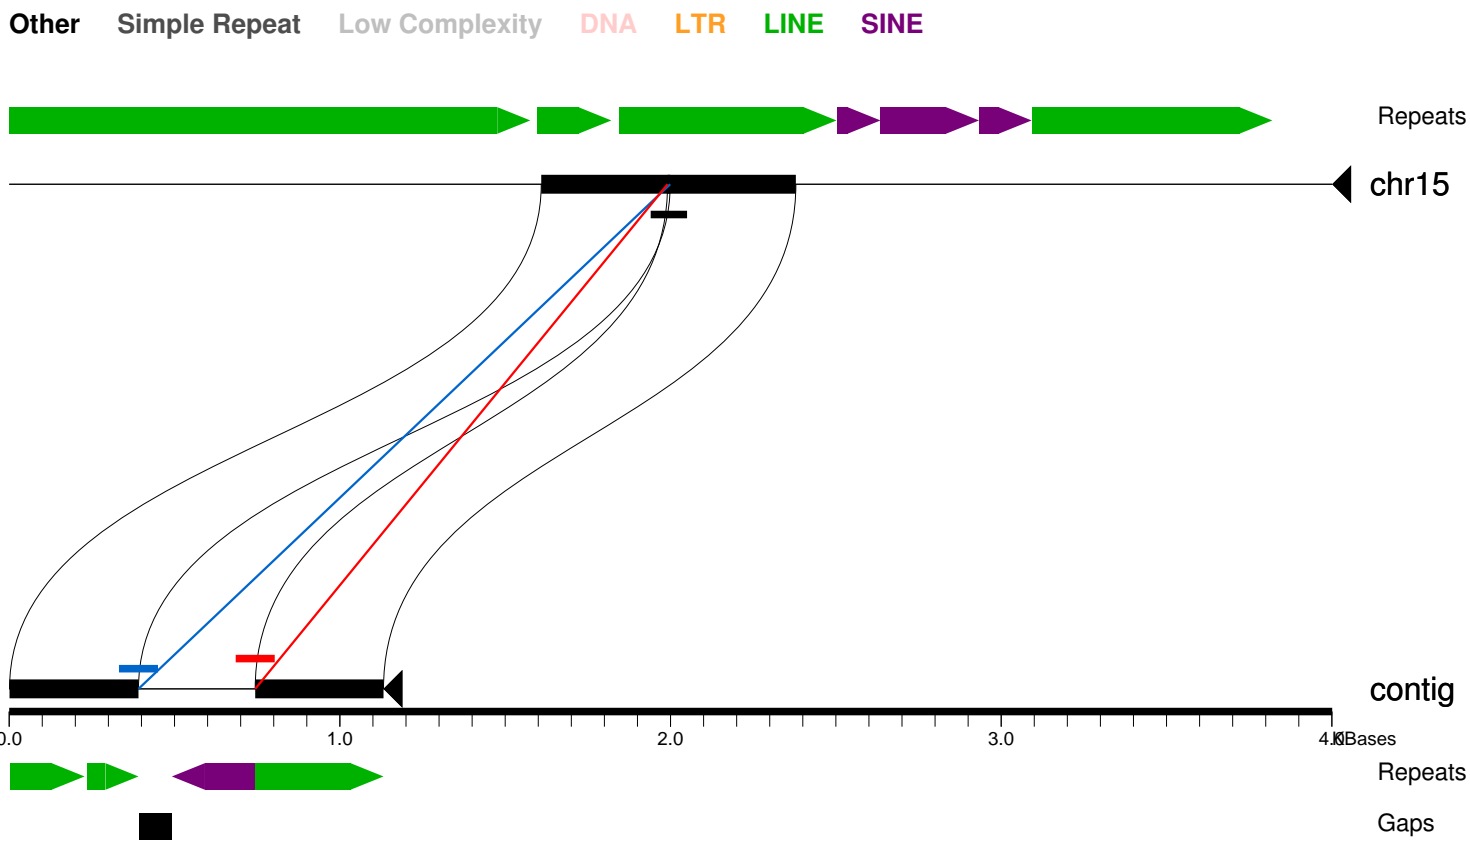









siteID: chr15\_73983323 Scaffoldig2 - Breakpoint: chr15:73983311

chr15:73983151-73983479

Overlap Length: 9 INS size: 313 Genotyped: Yes

```
left      -----GCCCACTGTGGTGAGGGGCAAGTAGGAAGAGGTGAGGCTGGGCAGGTGGGCAGGGCCAGGGCAGA
chrom     AAGCAGCCCACTGTGGTGAGGGGCAAGTAGGAAGAGGTGAGGCTGGGCAGGTGGGCAGGGCCAGGGCAGA
right     -----TTTAGT-----AGAGACGGGGTTTCACCGTTTTA----GCCAGG----A
          1111111*1*1**11111111111111111111****11*1**1*111*1*1*1111111*****1111*
```

```
left      TGGGGCTCTGTAGGCTATGGAGGAGCT-GCGATCTTATCACAAAGGAAAAGTGAACAGCCCTATGATTAACT
chrom     TGGGGCTCTGTAGGCTATGGAGGAGCT-GCGATCTTATCACAAAGGAAAAGTGAACAGCCCTATGATTAACT
right     TGGT-CTCGATCTCCT-----GACCTCGTGATCCGCCCCGCTCGGCCTCCCAAAGTGCTGGGATTACAG
          ***11***11*111**1111111**1**1*1****1111*1*111*1111111*1**11**11*****111
```

```
left      ATTGAAGGCAGTGATATAAAT-TATGCTTTTPTTTTTTTTTTTAATTTTTTTTT----TTTTTTGAG----
chrom     ATTGAAGGCAGTGATATAAAT-TATGCTTTTATATTAATAGCAATTATTTCTGGCTGTTGTATAGAGTATA
right     GCGTGAGCCACCGCGCCCGGCTATGCTTTTATATTAATAGCAATTATTTCTGGCTGTTGTATAGAGTATA
          11111*1*1**11*11111111111******2*2**22*222****2**2*22222**2*2*2**2222
```

```
left      -----ACGGAGT-----CTCGCTCTGTCGCCCAGGCTGGAGTGCAGTGGC-----GG
chrom     GATTGGAGAACAGAAATTGGGTGGGGGAAGTGAACAGACTGG--TGAAGAGGCTTTTATAGT
right     GATTGGAGAACAGAAATTGGGTGGGGGAAGTGAACAGACTGG--TGAAGAGGCTTTTATAGT
          222222222**2**2*222222222222**2*2222*22*22***2****22**2**2***2222222*2
```

```
left      GATCTCGGC-----TCACTGCAAGCTCCGCCTCCCGGGTTCA----CGCCATT
chrom     TATCCAGGCAAGAGATGA-TGGTGACTTGGGAAGACCAGGAAGAGAAGCAGGGGT
right     TATCCAGGCAAGAGATGA-TGGTGACTTGGGAAGACCAGGAAGAGA-----
          2**22**222222*2*2**2222**2*2222*2*2*222*22  1N1N1N1
```

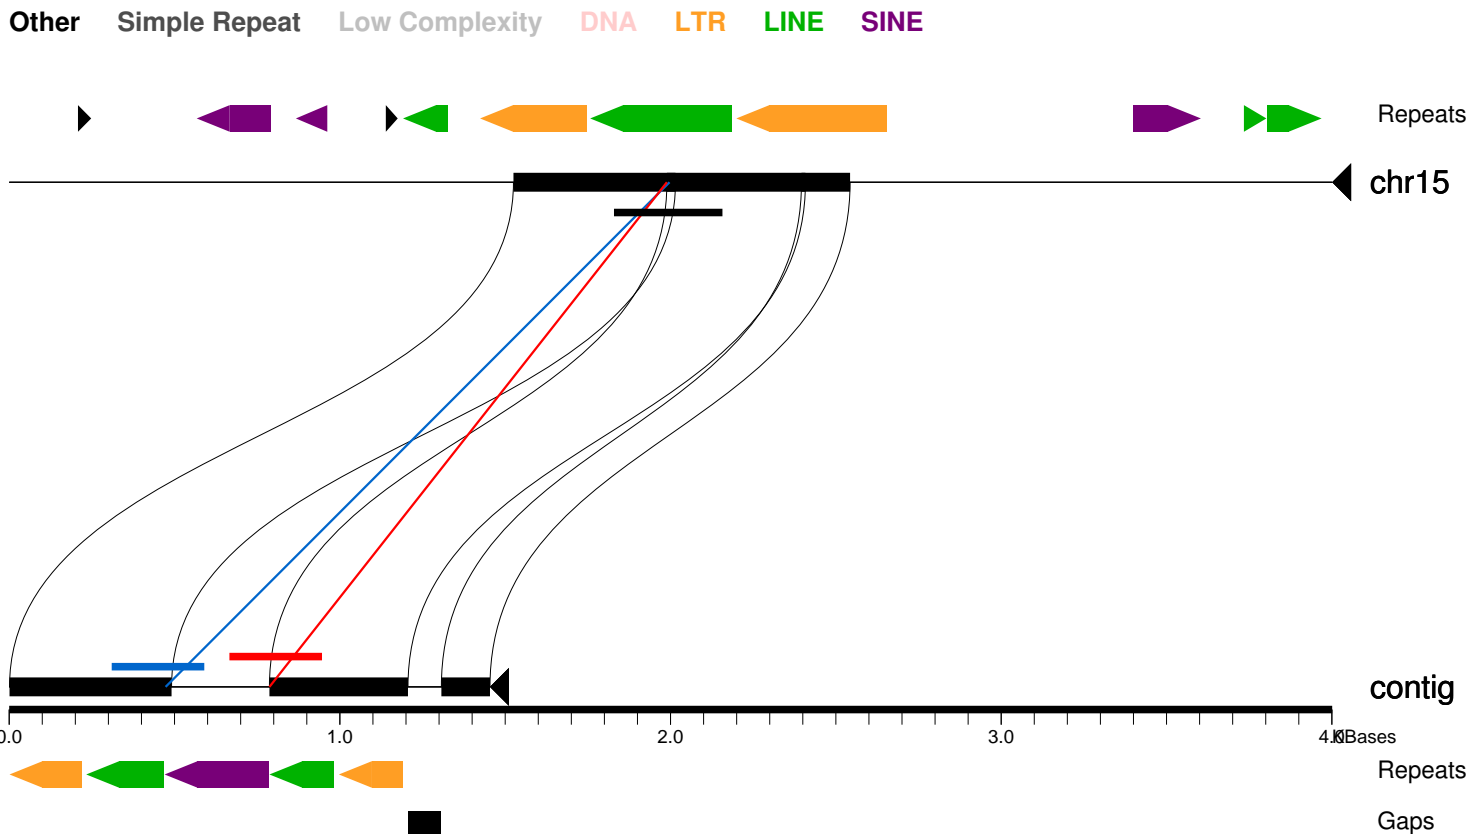



siteID: chr15\_77092474 Scaffold3 + Breakpoint: chr15:77092489

chr15:77092442-77092545

Overlap Length: 13 INS size: 272 Genotyped: Yes

```
left  -TCCC---CTCCTG-----TG-TCAGAAC----CTGTATAC-AGTATTCTGC-ATAACATATACATGGA
chrom -TCCC---CTCCTG-----TG-TCAGAAC----CTGTATAC-AGTATTCTGC-ATAACATATACATGGA
right GTCTCGATCTCCTGACCTCGTGATCCGCCC GCCTCGGCCTCCCAAAGTGCTGGGATTACATA--CATGGA
      1**1*111*****111111**1**1*11*1111*1*11*1*1*111*1***11**1*****11*****

left  TATTTT TTTTTTTTTTTTTTTTTTTTTTTTTTTTGAGACGGAGTC-TCGTTCTGTCGCCCAGGCGGGAGTG
chrom TATTTT TATAGTAGAATAT-----CAGAATCATAATACTATAATA-ACTAAGAAAAAT
right TATTTT TATAGTAGAATAT-----CAGAATCATAATACTATAATA-ACTAAGAAAAAT
      *****2*22*2222*2*222222222222222*2**2**2*22*2**2*22222*2222*2*222
```

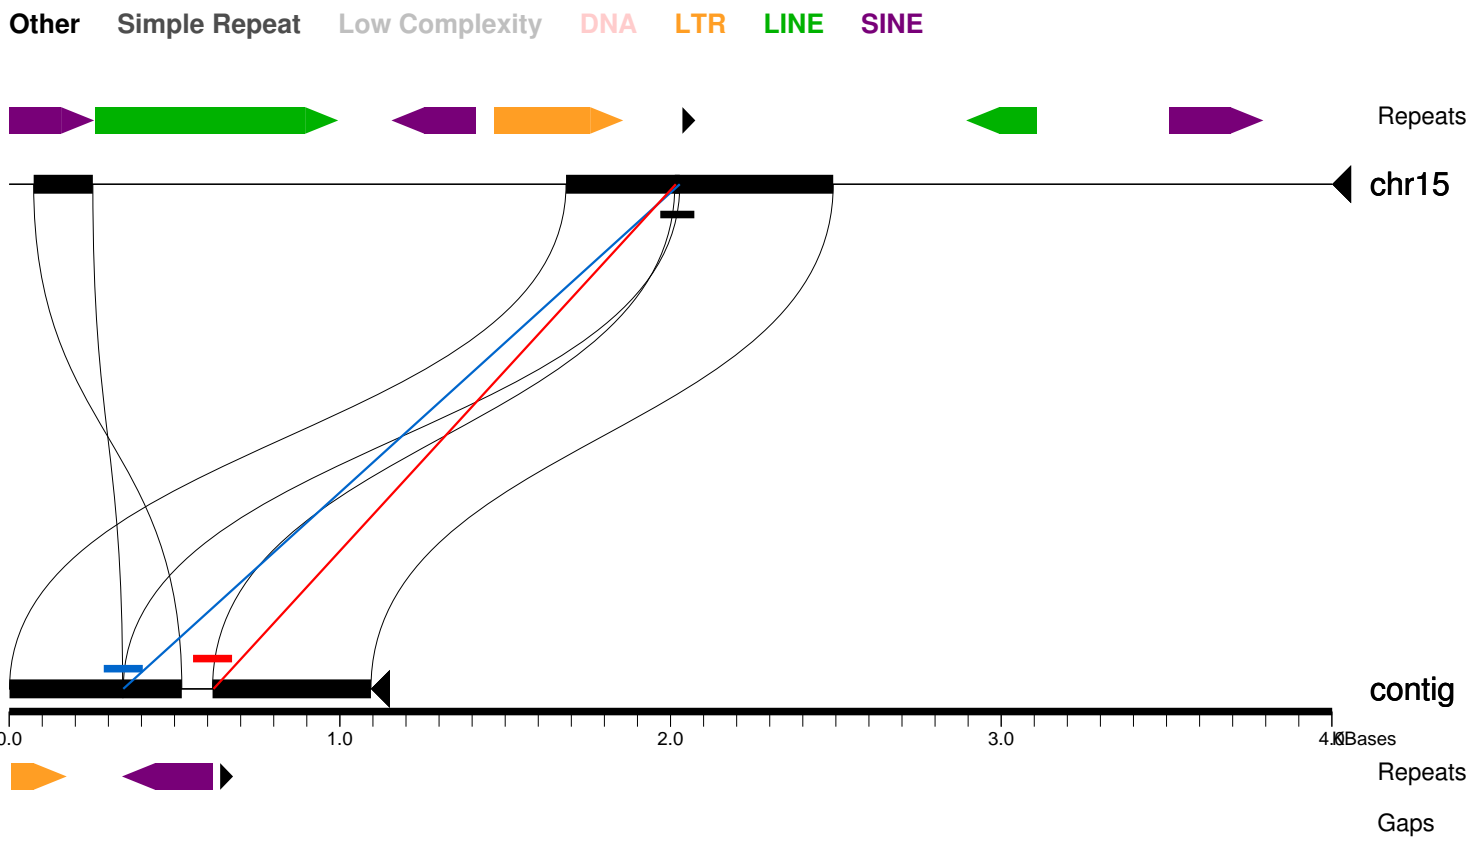

siteID: chr15\_79795856 Scafftig5 - Breakpoint: chr15:79795873

chr15:79795713-79796045

Overlap Length: 13 INS size: 302 Genotyped: Yes

```
left  N---NNNNNNN-NNNNNNNNNNNNNNNNNNNNNNNNNNNNNNNNNNNNNNNNNNNNNNNNNT-----GAGATTGA
chrom T---GTGGAC-CTCATTTCCTCCATTAAAAACAACATCAACAACAAACTCTTCAAAGTGACTGAACTTGA
right TTTAGTAGAGACGGGGTTTCACCGTTTTAGCTGGGATGGTCT-CGATCTC-----CTGACCTCGT
      211122N22N12NNNN2222N22N22NN2NNNNNN22NNN2NN2N2N2221          22**N2*1*1
```

```
left  GAATGAGTATGCTCTCTTTAAATTTTCATACTCC-ACAGTGCTATAATAGAATTTTTAGGCATATTCTAA
chrom GAATGAGTATGCTCTCTTTAAATTTTCATACTCC-ACAGTGCTATAATAGAATTTTTAGGCATATTCTAA
right GA-----TCCGCCCGCCT-----CGGCCTCCCAAAGTGCTGGGAT-----TACAGGCGTG-----A
      **111111*11**1*1*1*11111111*111****1*1*****111**111111*11****1*111111*
```

```
left  GTCCATTAAGAATTATACAGGGCATCACATACATTCTTTTTTTTTTTTTTTTTTTTTTTTTTGGAGACAGAG
chrom GTCCATTAAGAATTATACAGGGCATCACATACATTCTTTAAAGAGACTTGGTGGTTGTATGTGAGATTCAA
right G-CCACCGCG-----CCCGGC--CACATACATTCTTTAAAGAGACTTGGTGGTTGTATGTGAGATTCAA
      *1***1111*11111111*11***11*****111*22222222**22*22**2*2*2*****222*2
```

```
left  TCTCGCTCTGTCGCCAGGCTGGAGTGCAG-----TGGCGGGATCTCGGCTCACTGCA-AGCT-C
chrom ATTTTCTA-GTCATCAGGCTTGGGAAGAGAAAATATCCTAATTTTACAAATATCCCCCAAGAACAGAGCTGC
right ATTTTCTA-ATCATCAGGCTTGGGAAGAGAAAATATCCTAATTTTACAAATATCCCCCAAGAACAGAGCTGC
      22*22**221**22*****2*2*222**2222222222*22*222**2*22*22*222**2*****2*
```

```
left  CGCC-----TCCCGGGTTCAC--GCCATTCTC-----CTGCC-----
chrom CGACATATATAATTATGCAGACTCCACCAGTGATTCCCTGATGTTGTTTCTCACTAATT
right CGACATATATAATTATGCAGACTCCACCAGTGATTCCCTGATGTTGT-----
      **2*2222222222*2*2*22*2**22*22***2*22222222  11NN1
```

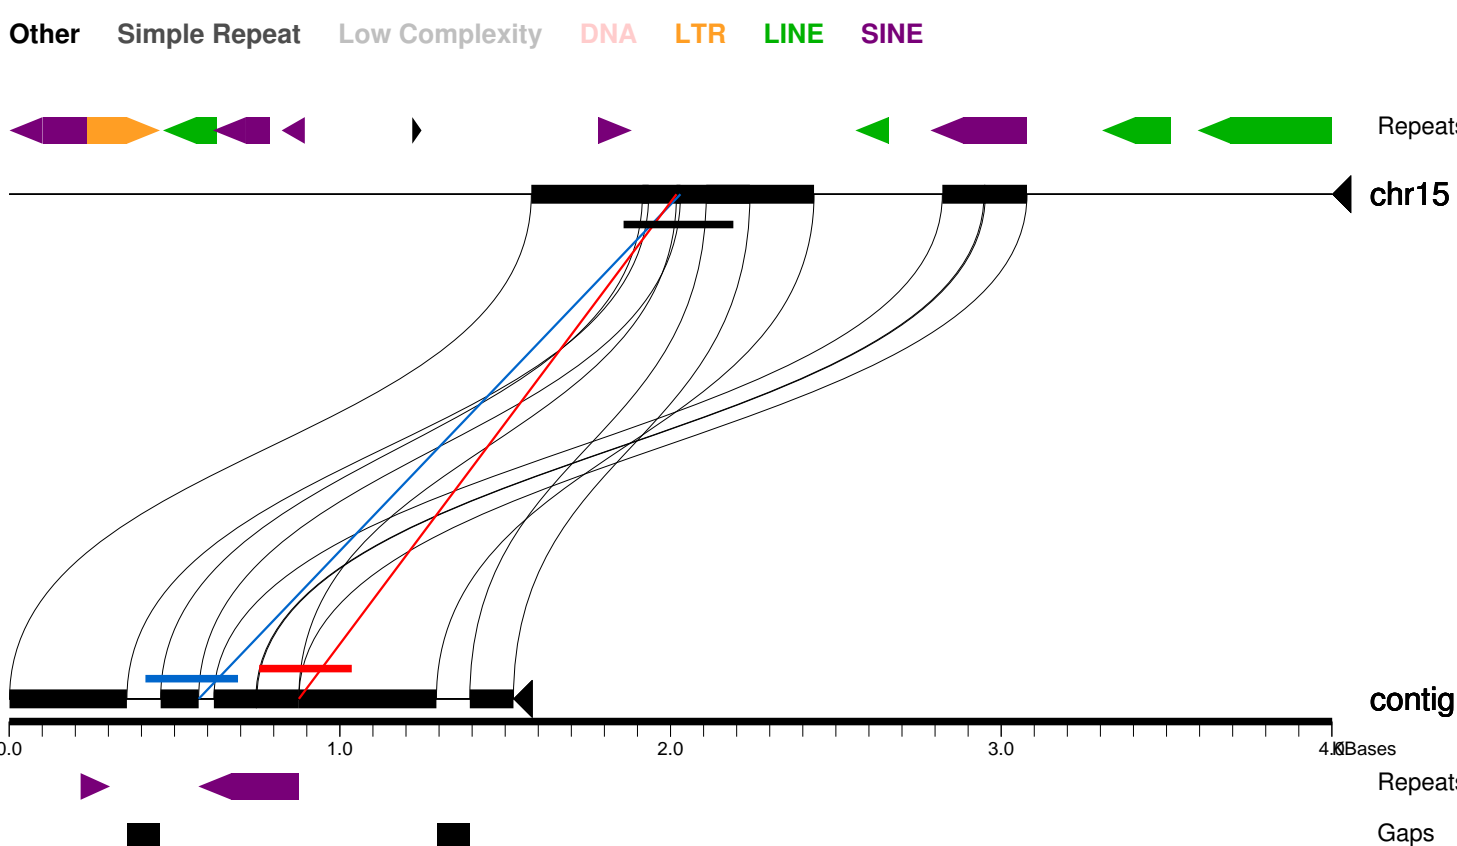

siteID: chr15\_81392579 Scaffoldig1 + Breakpoint: chr15:81392586

chr15:81392543-81392645

Overlap Length: 12 INS size: 375 Genotyped: No

```

left  CAA-----GAATTATTTAACATCTGC-ATTAT-----TTTGAAACTGTATTCAT--AATACTTATTT
chrom CAA-----GAATTATTTAACATCTGC-ATTAT-----TTTGAAACTGTATTCAT--AATACTTATTT
right CCGCCCGCCTCGGCCTCCCAAAGTGCTGGGATTACAGGCCTGAGCCACCGCGCCCGGCCAATACTTATTT
      *111111111111*1111*11111**111***11*****1111111*11*11**1*11111*11111*****
  
```

```

left  CTTTTTTTNNNNNNNNNNNNNNNNNNNNNNNNNNNNNNNNNNNNNNNNNNNNNNNNNNNNNNNNNNNNNN
chrom CATTCTTAGTTCTAAGTTTAAATTATTTTCAGTGTCTGATTATCTGTCTCTAC-----
right CATTCTTAGTTCTAAGTTTAAATTATTTTCAGTGTCTGATTATCTGTCTCTAC-----
      *2*2**22*2222222222222222222222222222222222222222222222222222222222222222
  
```

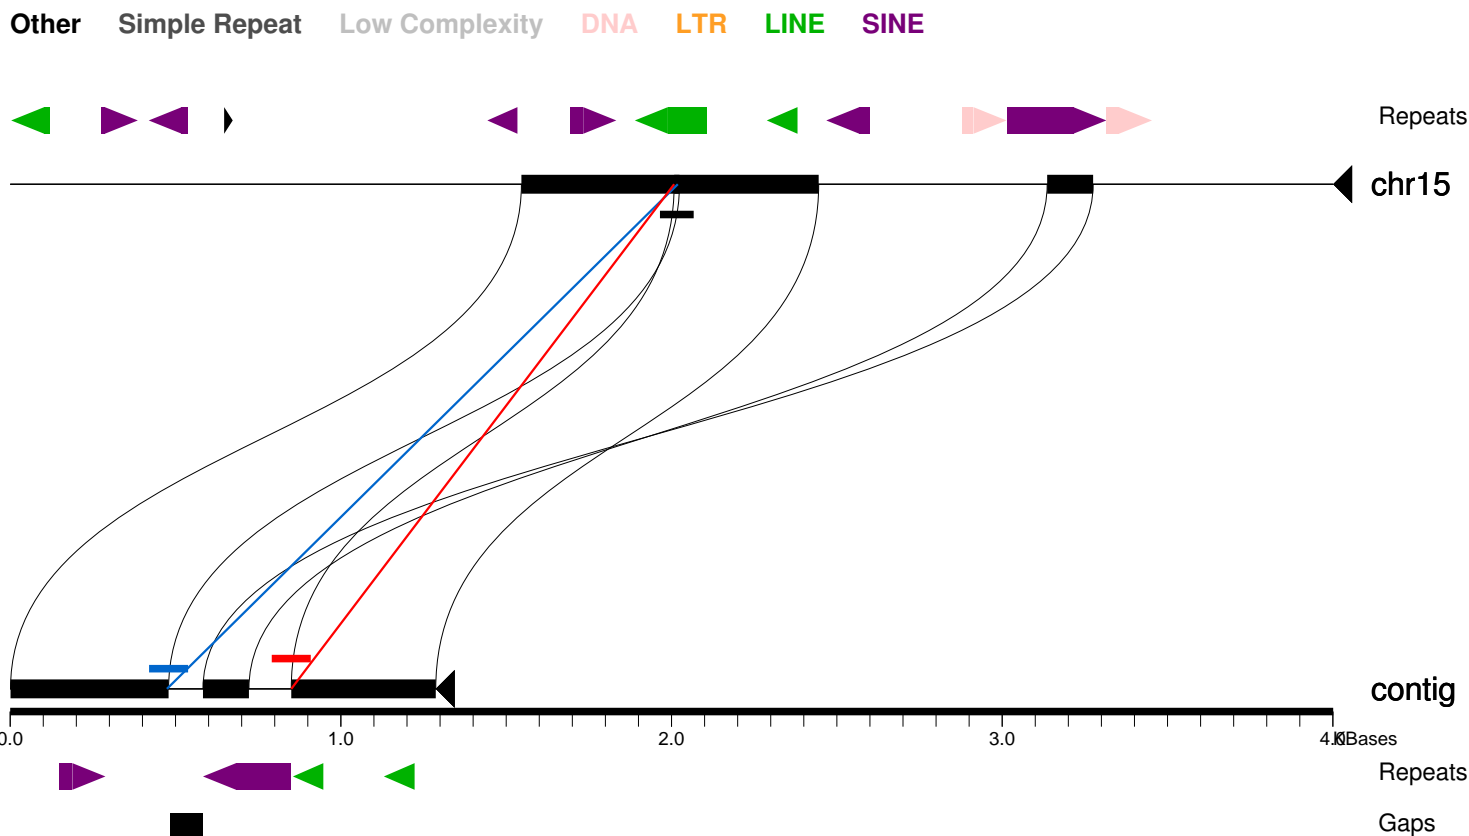



siteID: chr15\_82035645 Scafftig3 - Breakpoint: chr15:82035657

chr15:82035610-82035716

Overlap Length: 13 INS size: 316 Genotyped: Yes

```
left TAGGTTTCCTCTGGTT-----GTACTCTT-TGATAGAAATTGGCTTCAAAGTT-----AAGCTTATTTT
chrom TAGGTTTCCTCTGGTT-----GTACTCTT-TGATAGAAATTGGCTTCAAAGTT-----AAGCTTATTTT
right CCGCCCGCCTCGGCCTCCCAAAGTGCTGGGATTACAGGCGTGAGCCACCGCGCCCGGCCAAGCTTATTTT
      11*11111****1*11*111111**1**1111*1*1**111*11**11*111*1111111*****
```

```
left CTTTCTTTTTTTTTTTTTTTTTTTTTTTTTTTTTTTTTTTGAGACGGAGTCTCGCTCTGTCGCCAG
chrom CTAACTGGGCAGATGTCCATATTTTTTTAATACTCTGGA-GGAGT-TAATTC-----
right CTAACTGGGCAGATGTCCATATTTTTTTAATACTCTGGA-GGAGT-TAATTC-----
      **22**2222222*2*222*2*****22*2N*222**2*****2*222**2222222222
```

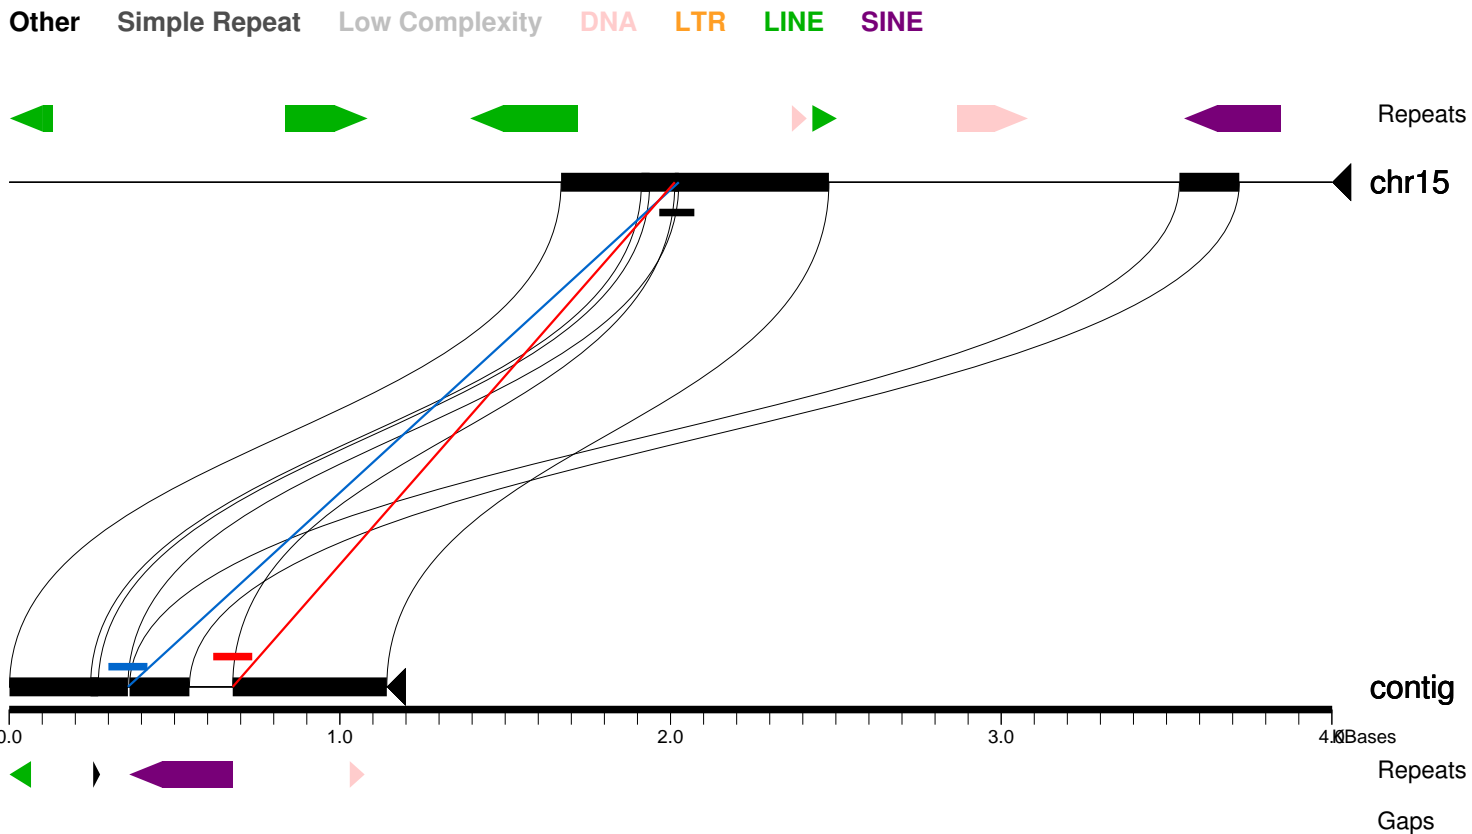

siteID: chr15\_86224926 Scafftig4 + Breakpoint: chr15:86224951

chr15:86224904-86225010

Overlap Length: 13 INS size: 299 Genotyped: Yes

```
left CCTGTTTGCTAATCT-----ATTCTAGCAATTCT--CATGAAAATATTAGAGA----TGAGCTAGATC
chrom CCTGTTTGCTAATCT-----ATTCTAGCAATTCT--CATGAAAATATTAGAGA----TGAGCTAGATC
right CCACCCACCTCGGCCTCCCAAAGTGCTGGGATTACAGGCGTGAGCCACTGCGCCCGGCC**TGAGCTAGATC
**111111**111*1111111*1*1**1*1*1*1*111*1***11111*11*1111111******
```

```
left TTTTTTTTTTTTTTTTTTTTTTGGAGACGGAGTCTCGCTCTGTCACCCAGGCTGGAGTGCAGTG--
chrom TTATAGAAACATAT-----AAAAGCAGTAT-----TAACGGATAAAAATATGACATTTAA
right TTATAGAAACATAT-----AAAAGCAGTAT-----TAACGGATAAAAATATGACATTTAA
**2*2222222*2*2222222*2*2*2**2*2222222*2**22*222222*222**2*222
```

Other Simple Repeat Low Complexity DNA LTR LINE SINE

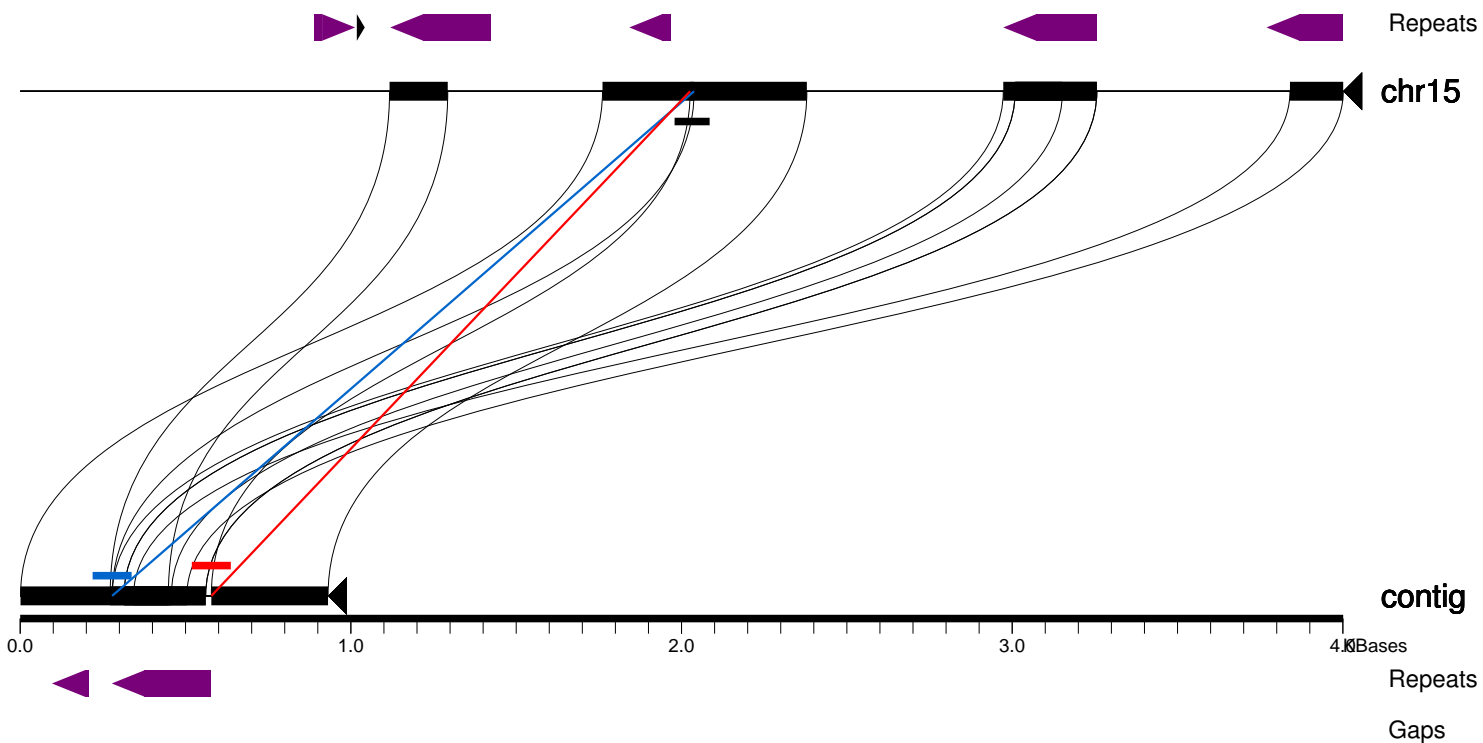

siteID: chr15\_88629748 Scafftig2 - Breakpoint: chr15:88629728

chr15:88629690-88629798

Overlap Length: 22 INS size: 447 Genotyped: No

```
left   TAGATATATTGGGCTAAAAAT-ACATAATTAGAATTA-----ATTCACCTGTTTCTTTTTTTTTTTT
chrom  TAGATATATTGGGCTAAAAAT-ACATAATTAGAATTA-----ATTCACCTGTTTCTTTTTATTTTTTT
right  GCCTCCCAAAGTGCTGGGATTACAGGCGT-GAGCCACCGCGCCCGGCCATCACCTGTTTCTTTTTATTTTTT
       1111111*11*1***111*1***1111*1**111*1111111111111*****N*****2*****

left   TTTTTTTTTTTTAGA-CGGNNNNNNNNNNNNNNNNNNNNNNNNNNNNNNNNNNNNNNNNNNNNNNNNNN
chrom  AA-----AAA-CATGGCTACTAGAAAACATCAAAGTATGTATGGGGCTCTCTCGT
right  AA-----AAAACATGGCTACTAGAAAACATCAAAGTATGTATGGGGCTCTCTCGT
       222222222222*2*1*22222222222222222222222222222222222222222222222222222
```

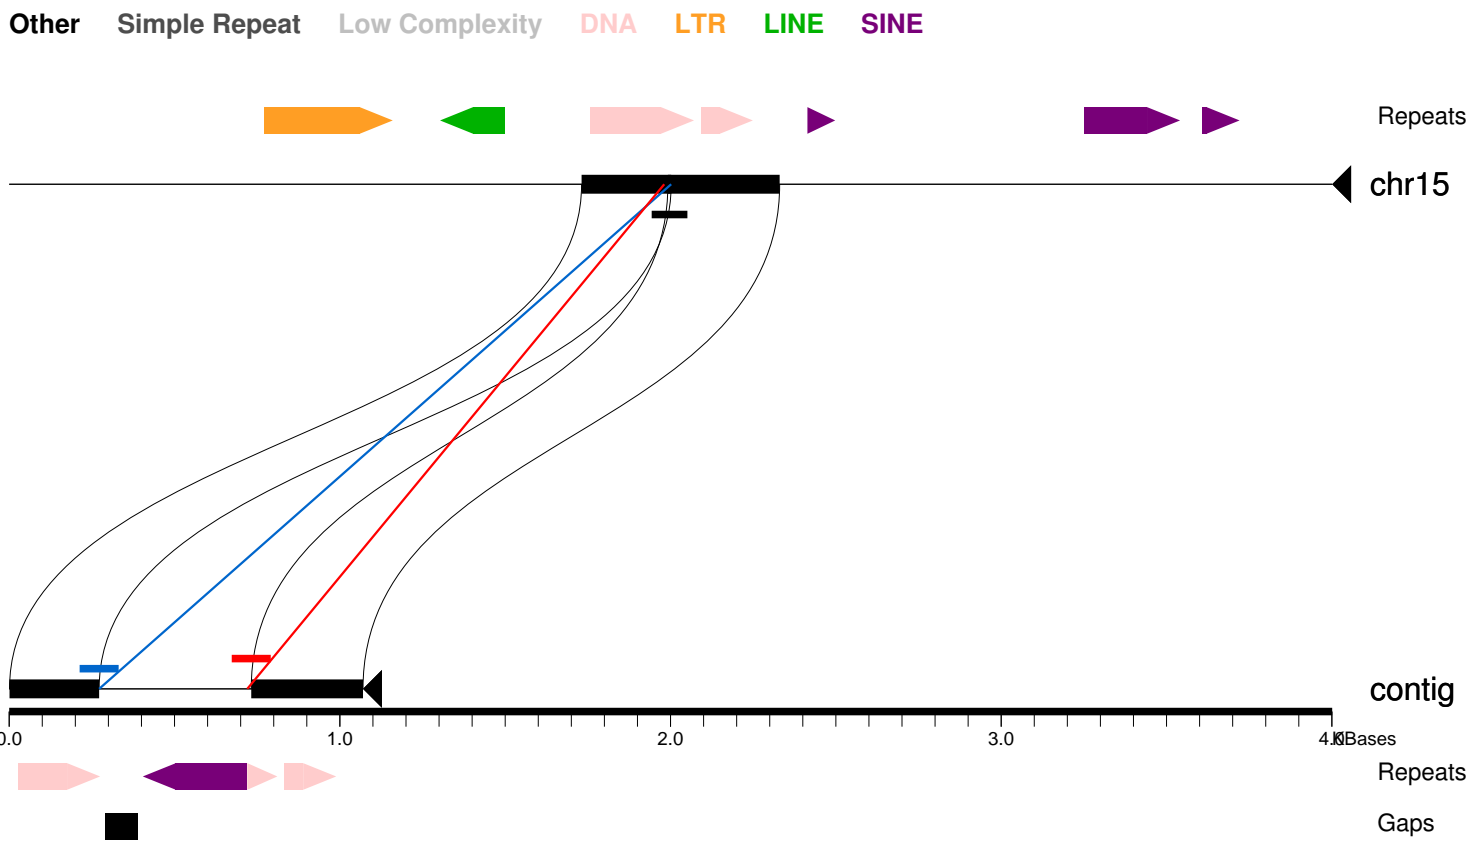

siteID: chr15\_92573047 Scafftig4 + Breakpoint: chr15:92573044

chr15:92572995-92573103

Overlap Length: 11 INS size: 297 Genotyped: Yes

```
left  GCCCCAGGATCTGGGCTCCC--AGTGCAGCTG----AGGCCTG-----CTCACTTGGCTTCATACATTT
chrom GCCCCAGGATCTGGGCTCCC--AGTGCAGCTG----AGGCCTG-----CTCACTTGGCTTCATACATTT
right CCGCCCGCCTC-GGCCTCCCAAAGTGCTGGGATTACAGGCCTGAGCCACCGCGCCCGGCC-CATACATTT
      1*1**1*11**1**1*****11*****1*1111111*****1**111111*1*1*11***11*****
```

```
left  TTTTTTTTTTTTTTTTTTTTGGAGACGGAGTCTCGCTCTGTTCGCCAGGCTGGAGTGCAGTGG--C
chrom TTAATAGAACTCTT-----CCGTCTCACGTTATGA----GAGATAAAAAGATCTATGATTC
right TTAATAGAACTCTT-----CCGTCTCATGTTATGA----GAGATAAAAAGATCTATGATTC
      **22*22222*2**22222222*2*22**21*2*2**222222**22222**22*22**222*
```

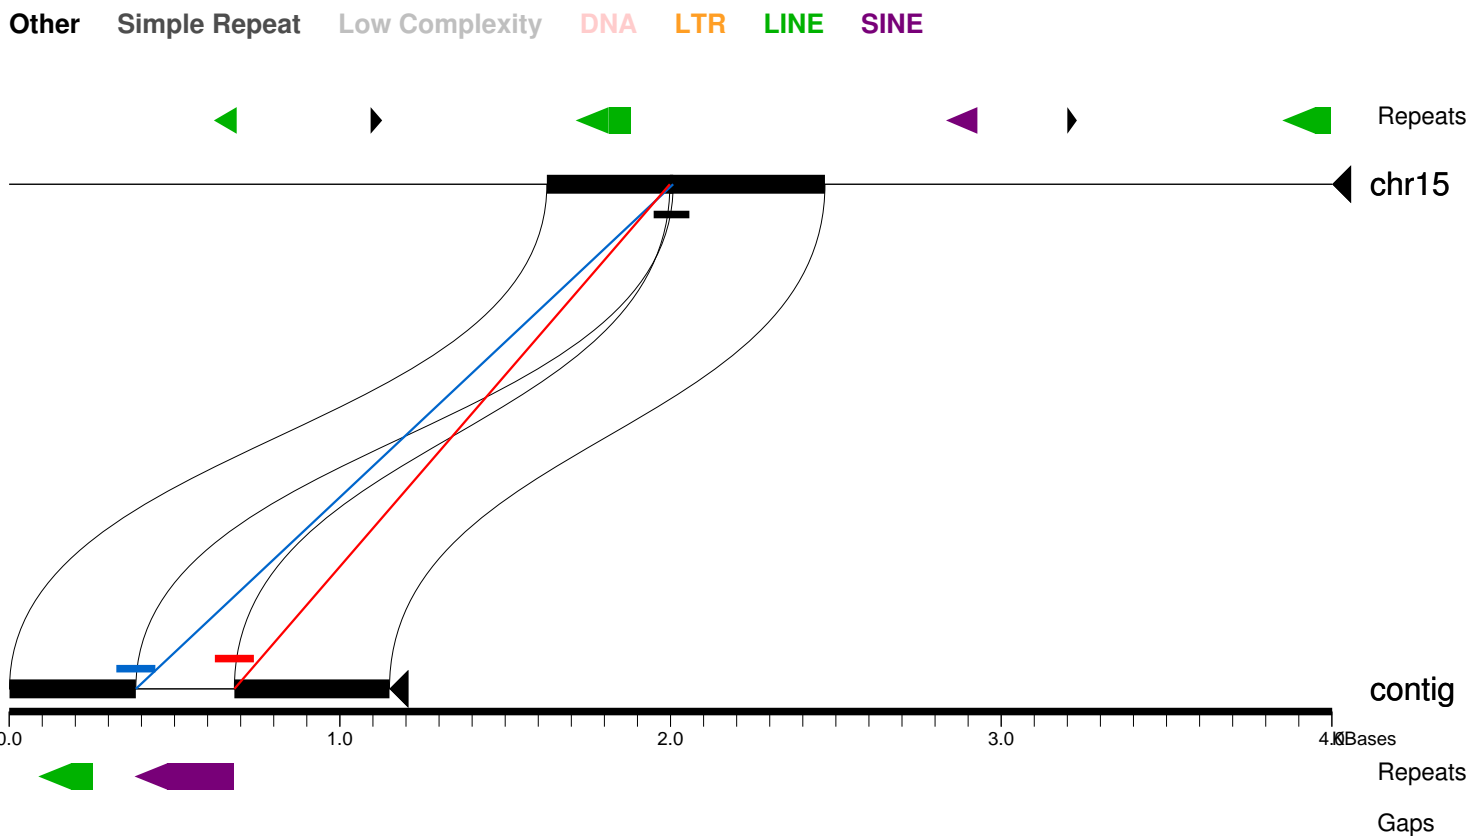

siteID: chr15\_94715723 Scafftig4 - Breakpoint: chr15:94715731

chr15:94715684-94715790

Overlap Length: 13 INS size: 298 Genotyped: Yes

```
left  AACCACAG-----TGAGATACC-ATCTC-ACACCCATTAGGATGACTATGATTTAAAAAACAAAA
chrom AACCACAG-----TGAGATACC-ATCTC-ACACCCATTAGGATGACTATGATTTAAAAAACAAAA
right CGCCACTGCACTCCAGCCTGGGCGACAGAGCGAGACTCCGTCTCAAAAAAAAAAAAAAAAAAAAAA
11****1*111111111111**1*11**11*1*111**1**111*111*11*11*11*111*****1****
```

```
left  ACGGCCGG-GCGCGGTGGCTCACGCCTGTAATCCCAGCACTTTGGGAGGCCGAGGCGGGCGG
chrom ACAAAGCAGAAAAACAAGTACTGGCAAGGATGCAAAGAAATT--GGAGACC-----
right ACAAAGCAGAAAAACAAGTACTGGCAAGGATGCAAAGAAATT--GGAGACC-----
**2222*22*2222222*22*22**22*2*22*22**2*2**22*****2**2222222222
```

Other Simple Repeat Low Complexity DNA LTR LINE SINE

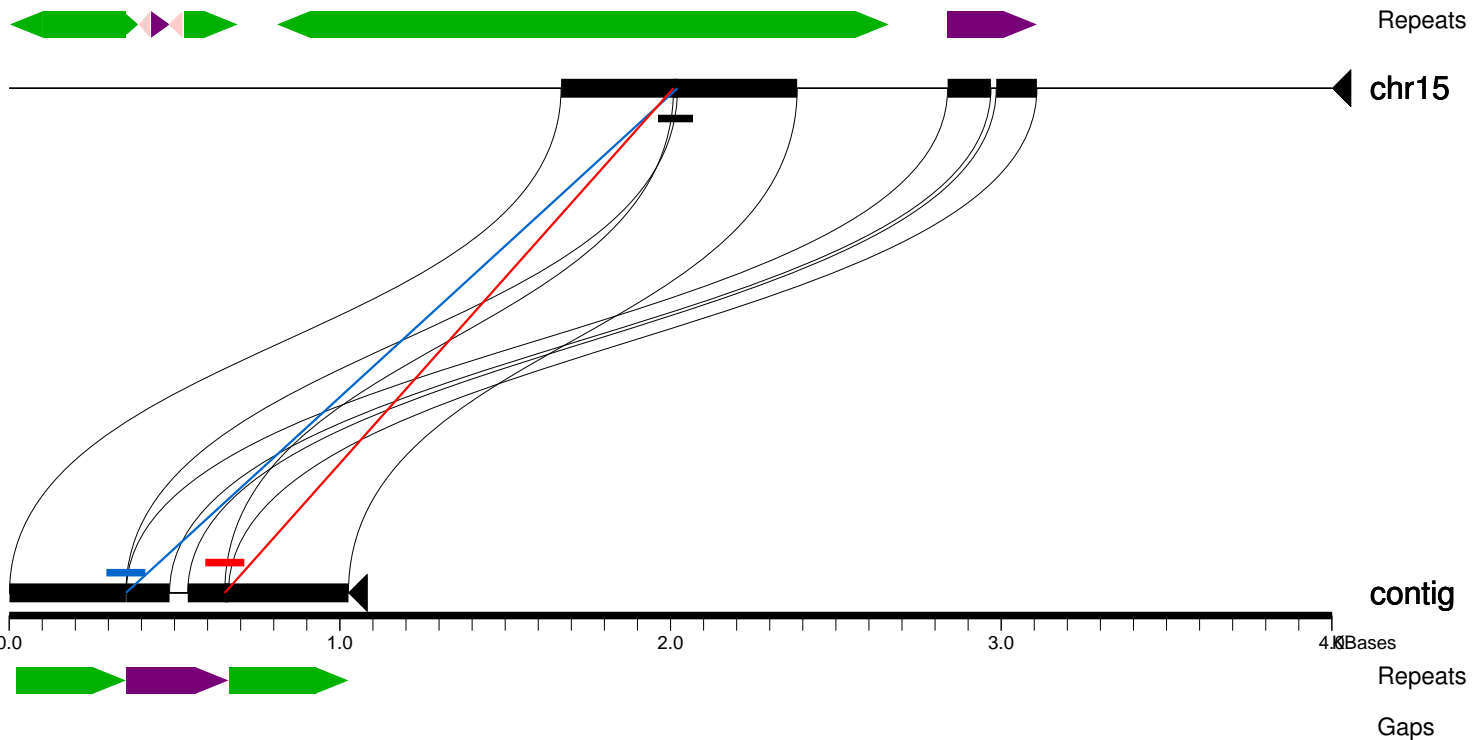

siteID: chr15\_94819888 Scafftig2 + Breakpoint: chr15:94819891

chr15:94819731-94820063

Overlap Length: 13 INS size: 293 Genotyped: Yes

```
left -----CTGAAAGTAGTATAACACATGACTCAACCTAAACAAAGAACAAAGGAAAAATTACAGGT
chrom  GTCTTTCTTTGCTGAAAGTAGTATAACACATGACTCAACCTAAACAAAGAACAAAGGAAAAATTACAGGT
right  -----CTGAG-GCAGGAGAA----TGGCGT-----GAACCCGGGA-----GGC
          ****11*1**1*1**1111**1*1111111111111111****111**111111111**1
```

```
left  TGATATTACATGTAAACTAG-TATGGACAAATAATAATATGTTTCGTAATCTGAATTCAGCAATGGTATTT
chrom  TGATATTACATGTAAACTAG-TATGGACAAATAATAATATGTTTCGTAATCTGAATTCAGCAATGGTATTT
right  GGAGCTTGCAGTGAGCCGAGATCCCGCCACTGCACTCCAGCCTGGGCGACAGA-----GCGAGACTCCGT
          1**11**1**111*11*1**1*111*1**1111*1111*111*1*1111*1**11111**1*111*111*
```

```
left  TTAAAAATATTACAATGCAAAATAAGAAATATTTGG-----CCGGGCGC----GGTGGCTCACGCCTGT
chrom  TTAAAAATATTACAATGCAAAATAAGAAATATTTGGTTATATCTCAGAATGAAAAAGATAGTTTAAACATTAG
right  CTCAAAAAAAAAAAAA----AAAAGAAATATTTGGTTATATCTCAGAATGAAAAAGATAGTTTAAACATTAG
          1*1***1*11*1**1111**1*1*****2222222*2*222*22222*2*2*2*2*2222*22
```

```
left  AATCCA--GCACTTTGGGAGG----CCGA-----GGCGGGCGGA----TCACGAGGTCAGGAGATCGAG
chrom  AATATCAATGTAATTTACTACATTAACAGATAAAAAGGAGAAAAAGAAACATGATTACTTAAACAGATGCAG
right  AATATCAATGTAATTTACTACATTAACAGATAAAAAGGAGAAAAAGAAACATGATTACTTAAACAGATGCAG
          ***22**22*2*2***222*222222*2**22222**2*2222**2222*2*22*22*2*22***22**
```

```
left  ----ACCATCCC--GGCTAAAA-CGGTGAAACCCCGTCT-----CTACTAA-A
chrom  GAAAAAAATCTTTTGGCAAAATTCAGCACTTGTCCATCTTAAAGAGCTGTTAGTA
right  GAAAAAAATCTTTTGGCAAAATTCAGCACTTGTCCATCTTAAAGAGCT-----
          2222*22***2222***2**22*2*2222222*2**22222**2**22222**NN11N 1
```

Other Simple Repeat Low Complexity DNA LTR LINE SINE

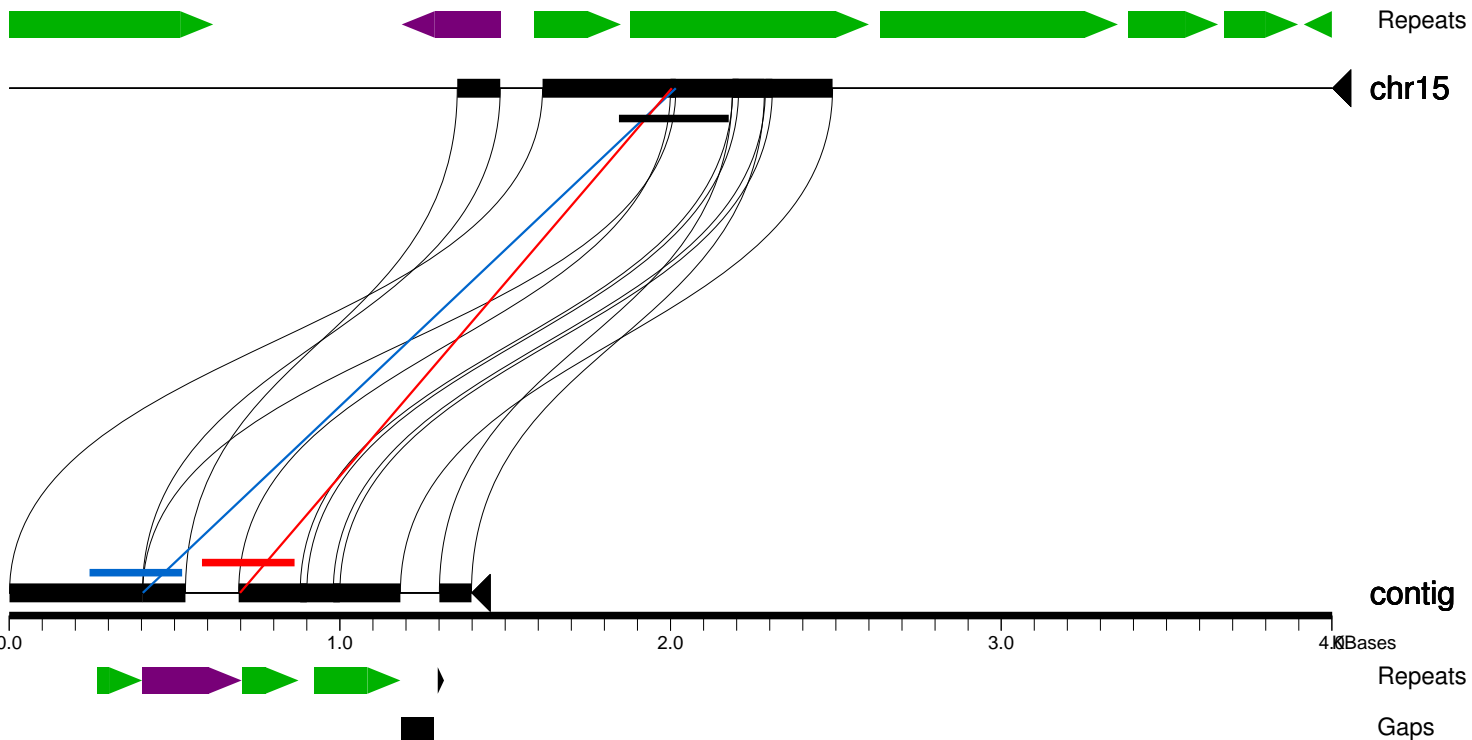

siteID: chr15\_95164998 Scaffoldig2 - Breakpoint: chr15:95165007

chr15:95164971-95165066

Overlap Length: 24 INS size: 282 Genotyped: Yes

```
left  ATAT-----TTGGTAAACT--ACTAAAACAT-----TGAATTT---TATAGAAAAATATAAA
chrom ATAT-----TTGGTAAACT--ACTAAAACAT-----TGAATTT---TATAGAAAAATATAAA
right GTGAGCCGAGATCGCGCCACTGCACTCCAGCCTGGGCGACAGAGCGAGACTCCGTCTCAAAAAAAAAA
      1*1111111111*1*1111***11***11*1*1*11111111111111**111*111*1*11*1***
```

```
left  ATAACATCATGAGGGCCGGGCGCGGTGGCTCACGCCGTGTAATCCCAGCACTTTGGGAGGCCGAGGCGGGC
chrom ATAACATCATGAGAT-----GTTATTTCAAGAAAGATGT-----TTTTTAATGACATAT-----
right ATAACATCATGAGAT-----GTTATTTCAAGAAAGATGC-----TTTTTAATGACATAT-----
      *****2222222222*2*222***2*222*2221222222222***222*2*2*222222222
```

```
left  GG
chrom --
right --
      22
```

Other Simple Repeat Low Complexity DNA LTR LINE SINE

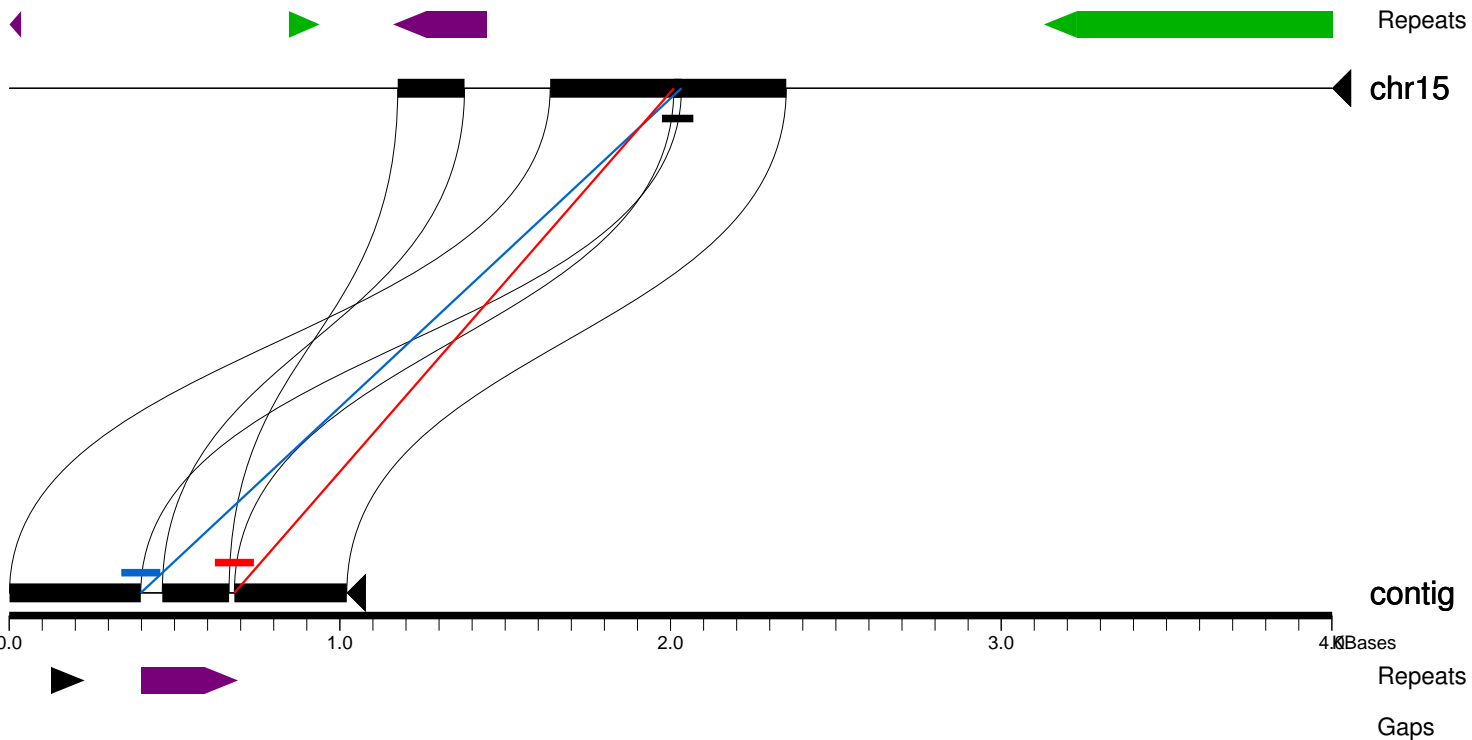

siteID: chr15\_95775878 Scafftig1 - Breakpoint: chr15:95775881

chr15:95775822-95775940

Overlap Length: 1 INS size: 418 Genotyped: No

```

left  GGATAAGGAGGAAGAGGAGGAGGGGGAGGAGAAAAGAGGAGGAGAAATGAAAGGAAAAGAAGGCCGGGCGC
chrom GGATAAGGAGGAAGAGGAGGAGGGGGAGGAGAAAAGAGGAGGAGAAATGAAAGGAAAAGAAATAATAATTA
right NNNNNNNNNNNNNNNNNNNNNNNNNNNNNNNNNNNNNNNNNNNNNNNNNNNNNNNNNNNNNNNNNNNNNNN
1111111111111111111111111111111111111111111111111111111111111111111111*2222222222

```

```

left  GGTGGCTCACGCCTGTAATCCCAGCACTTTGGGAGGCCGAGGCGGGTGG---
chrom --TTATTATGAAATGAAAAATCATG-CTGACAACAGTAGAAGCAAATAAAATT
right --TTATTATGAAATGAAAAATCATG-CTGACAACAGTAGAAGCAAATAAAATT
22*222*222222**2**222**222**2222222*22**2**222*22222

```

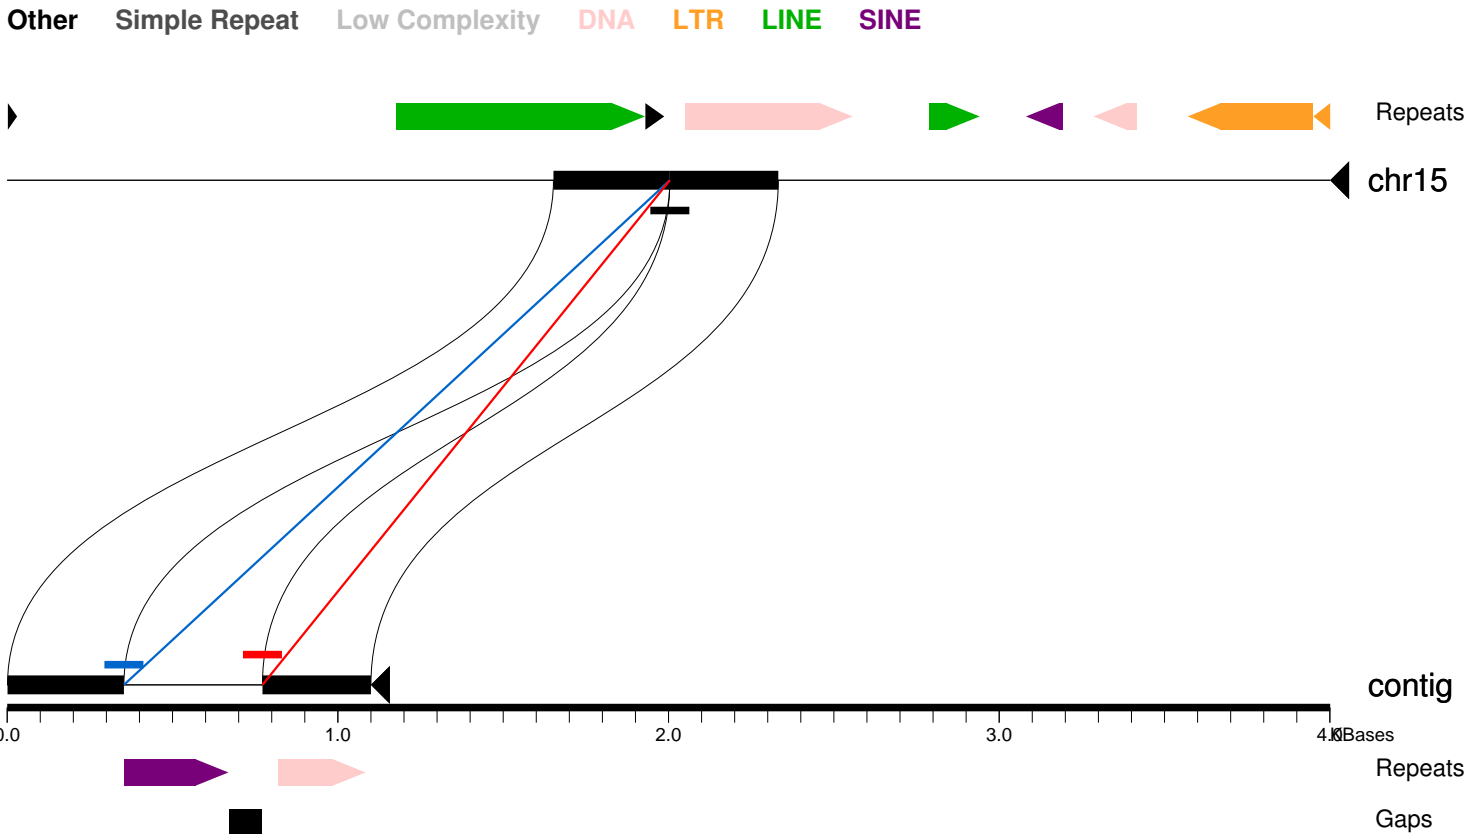



siteID: chr15\_96127788 Scafftig4 - Breakpoint: chr15:96127767

chr15:96127720-96127826

Overlap Length: 13 INS size: 275 Genotyped: Yes

```
left  ---GCTAGTC--CTAATCCAAAGCTCTTTGT-----ATAGCATCTAGTCTGTATTTTAAGATGAAAT
chrom ---GCTAGTC--CTAATCCAAAGCTCTTTGT-----ATAGCATCTAGTCTGTATTTTAAGATGAAAT
right CAGCCTGGGCGACAGAGCGAGA-CTCCGTCTCAAAAAAAAAAAAAAAAAAAAAAAAAAAAAAAAAAAGATGAAAT
      1111**1*1*11*11*1*1*1*1***11*1*11111111*1*11*111*111111*1111*****
```

```
left  TGAACACTTTGGGAGGCCGAGGCGGGCGGATCACGAGGTCAGGAGATCGAGACCATCCCGGCT
chrom TGA AATAGT----TGCTGTTTCC-----ATCCTTGGGTAATCTTATCCCTTCCATTAT---T
right TGAAATAGT----TGCTGTTTCC-----ATCCTTGGGTAATCTTATCCCTTCCATTAT---T
      **2*222*22222**2*222*222222***2222***2*2222***2222***222222*
```

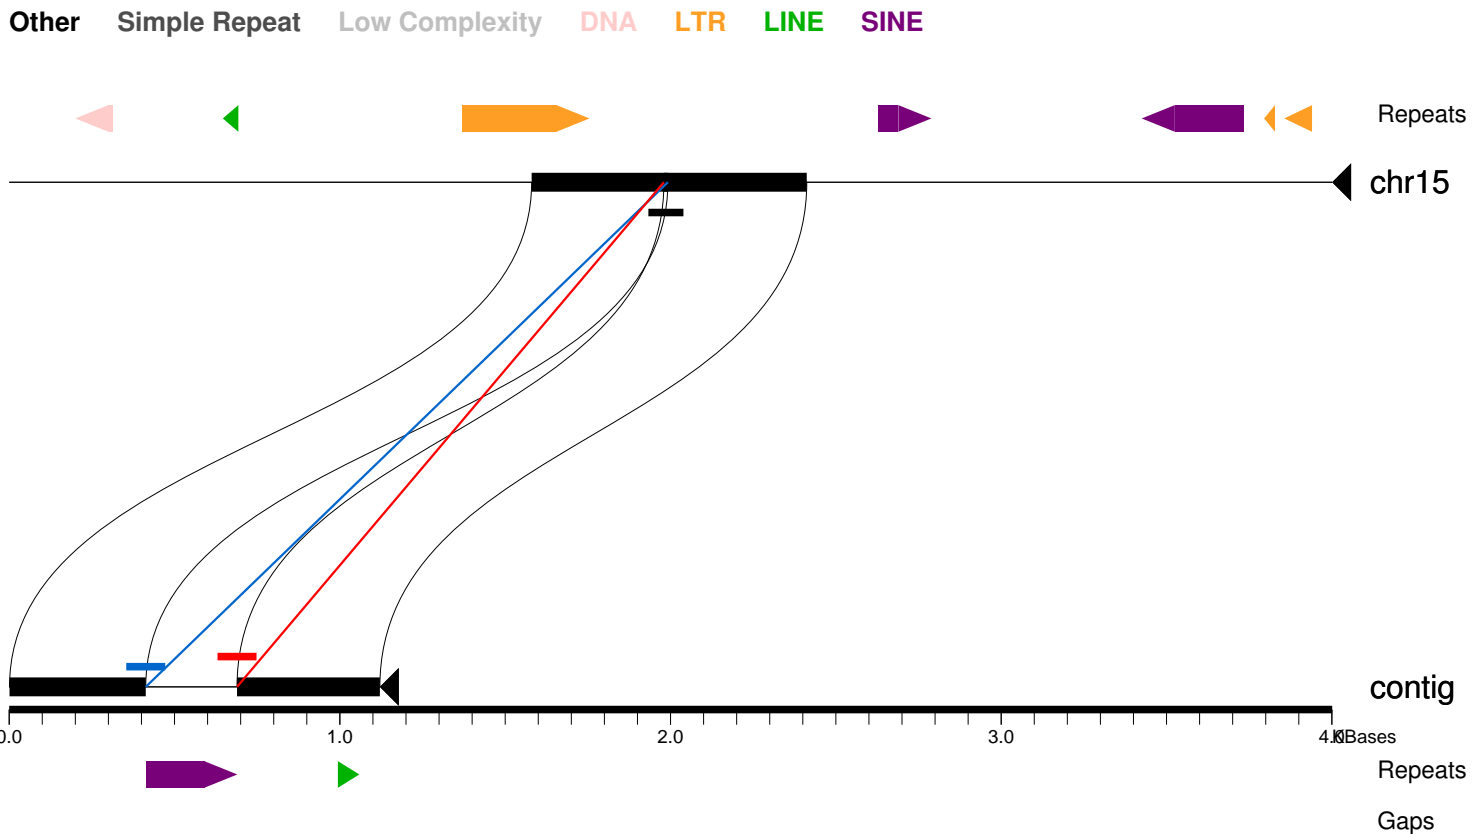





siteID: chr15\_97770218 Scafftig5 - Breakpoint: chr15:97770219

chr15:97770059-97770394

Overlap Length: 16 INS size: 311 Genotyped: Yes

```
left -----AGGAGAGATAAAATGGCACGTGCCTTAAGAGACGCAAATTACCAAAATTGACT
chrom TGATATGTCAGAAAATTAGGAGAGATAAAATGGCACGTGCCTTAAGAGACGCAAATTACCAAAATTGACT
right AGA-ATGGCGTGAACCCGGGAGGC-----GGAGCTTGCAGT--GAGCCG-AGATCCCAGCCACTGCACT
N22 222N2NNN22NNN1****1111111111**11*1**11*11**1**1*1**11*111*1*11**1
```

```
left TATGAA---GAAATAGAACATTTGAATATACTGATAACAAGCATAGAAAAGTATGTAATAACAAATATCCC
chrom TATGAA---GAAATAGAACATTTGAATATACTGATAACAAGCATAGAAAAGTATGTAATAACAAATATCCC
right CCAGCCTGGGCGACAGAGC-----GAGACTCCGTCTCAAAAAAAAAAAAAAAAA-----AAAAAAAA-----
111*11111*11*1**1*1111**111*1*111*1*1**11*1*1**111111**1**1**1*1111
```

```
left TCTCTCCCAAAAATTTTCAGGCTCAGAAGATTTCTTTGGTAGGCCGGGCGCGGTGGCT----CACGCC--T
chrom TCTCTCCCAAAAATTTTCAGGCTCAGAAGATTTCTTTGGTAGGCCGGGCGCGGTGGCT----CACGCC--T
right -----AAAA-----AGAAGATTTCTTTGGTAGGCCGGGCGCGGTGGCT----CACGCC--T
111111111****1111111111*****222222222222*222*22221*22**22*
```

```
left GTAATCCAGCACTTTGGGAGGCC-GAGG-----CGGGC-----GGA-TCACGAGG
chrom CTTTACAAAGCTCTTTTCAGATGATAGAGGTAGAGAAAACCTGTCCCAACTCATTCTAAGGACTCACGATT
right CTTTACAAAGCTCTTTTCAGATGATAGAGGTAGAGAAAACCTGTCCCAACTCATTCTAAGGACTCACGATT
2*22*2*2***2***22**2*222****2222222222*2*2*222222222222***2*****22
```

```
left TCAG-GAGATCGAGACC--ATCCCGCT---AAAACGGTGAAACCCCGTCTCTACTAAA
chrom ACTCTGAAACTGAGGCCTGATGAAGACACCACAATAAAAATAAACTGCAGACC-AGGAAC
right ACTCTGAAACTGAGGCCTGATGAAGACACCACAATAAAAATAAA-----
2*222**2*22**2**22**222*2*2222**2*222*2***1NN1NNNN121NN1N
```

Other Simple Repeat Low Complexity DNA LTR LINE SINE

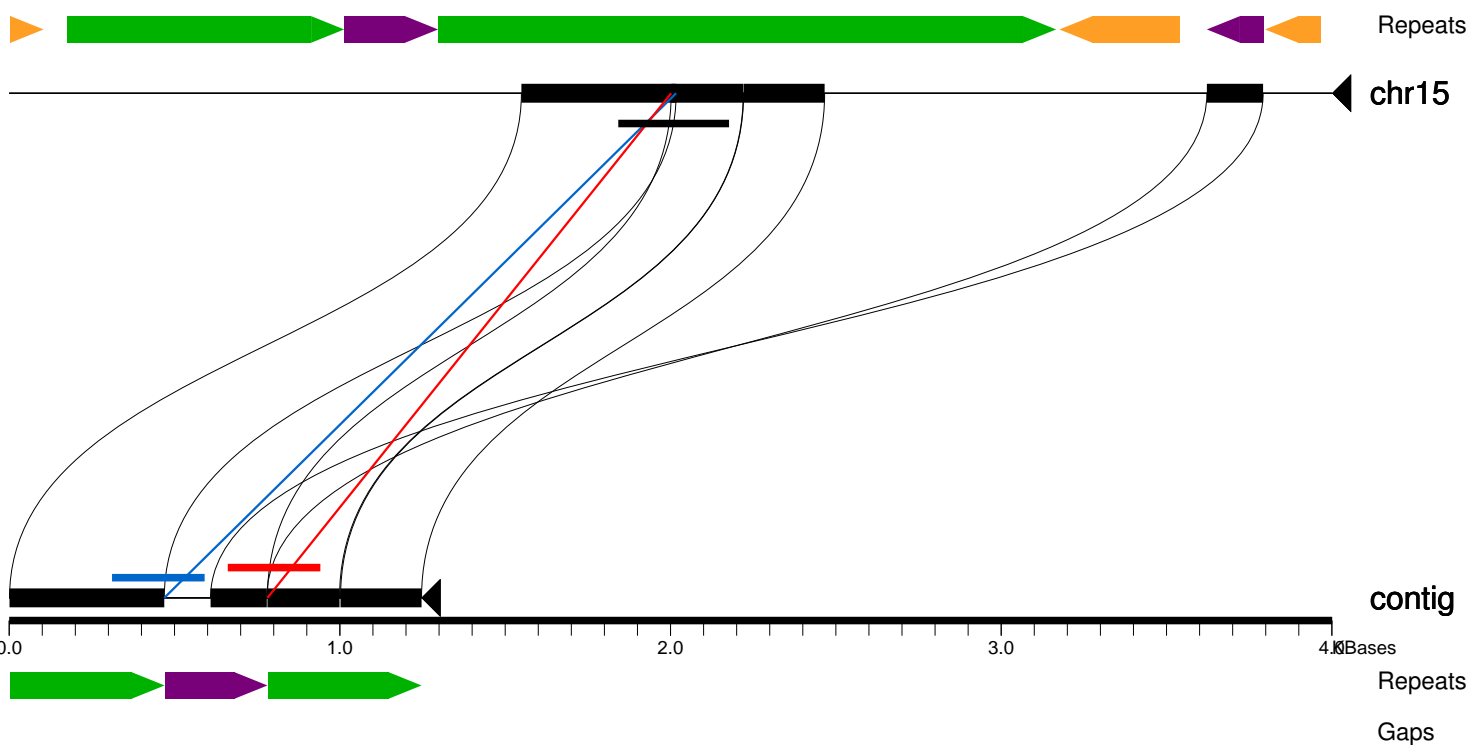







siteID: chr16\_18117815 Scafftig1 + Breakpoint: chr16:18117795

chr16:18117744-18117854

Overlap Length: 9 INS size: 421 Genotyped: No

```
left  AGTACCACTCATTCGCTGG---ACTGCTATGATT-----TGACCCTTCCTCACCTCACTGATCCTCTT
chrom AGTACCACTCATTCGCTGG---ACTGCTATGATT-----TGACCCTTCCTCACCTCACTGATCCTCTT
right CCACCCGC-CTCGGCCTCCCAAAGTGCTGGGATTACAGGCGTGAGCCA-CCGCGCCCGGCCGATCCTCTT
      1111**1*1*111****11111*1****11****1111111***1**11**1*1**111*1******
```

```
left  NNNNNNNNNNNNNNNNNNNNNNNNNNNNNNNNNNNNNNNNNNNNNNNNNNNNNNNNNNNNNNNNNNNNN
chrom TCAAATGTCCCTTTTACATAGGCTTCAGGCACCTTTGCTTTTATACTGGTT-----
right TCAAATGTCCCTTTTACATAGGCTTCAGGCACCTTTGCTTTTATACTGGTT-----
      22222222222222222222222222222222222222222222222222222222222222222222
```

Other Simple Repeat Low Complexity DNA LTR LINE SINE

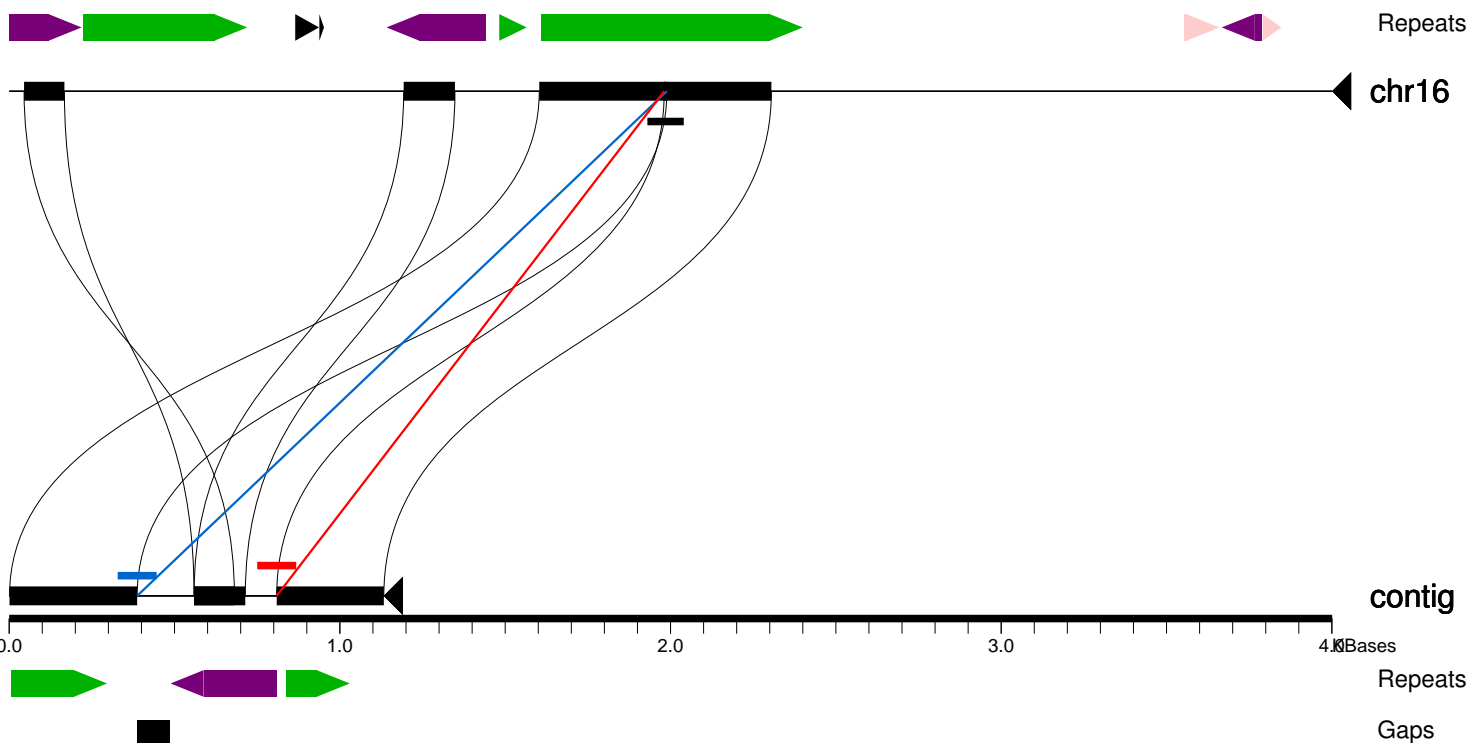



siteID: chr16\_22845998 Scafftig5 - Breakpoint: chr16:22845999

chr16:22845958-22846058

Overlap Length: 19 INS size: 295 Genotyped: Yes

```
left  -----TATTTTCAGAGGAATTTTGGGGTTTGTGGGTAACCATGCTTT-----AAAAAGTATCC
chrom -----TATTTTCAGAGGAATTTTGGGGTTTGTGGGTAACCATGCTTT-----A AAAAGTATCC
right ATCCCGCCACTGCACCTCCAGCCTGGGCGACAGAGCGAGACTCCGTCTCAAAAAAAAAAAAAA AAAAAAGTATCC
      111111111*1*1**1111*111*1**1*111*1*1*11**111*11*1111111111111* *****
left  ATTTTTTGGGCCGGGCGCGGTGGCTCACGCCTGTAATCCCAGCACTTTGGGAGGCCGAGGCGGGCGG
chrom ATTTTTT GATACA-----AATTAC-CAAGTTTTCCCCACCCCTATGGCAATAGAG-----
right ATTTTTT GATACA-----AATTAC-CAAGTTTTCCCCACCCCTATGGCAATAGAG-----
      ***** *222*222222222222*2**2*22**22*****22*2*2*22**22222***22222222
```

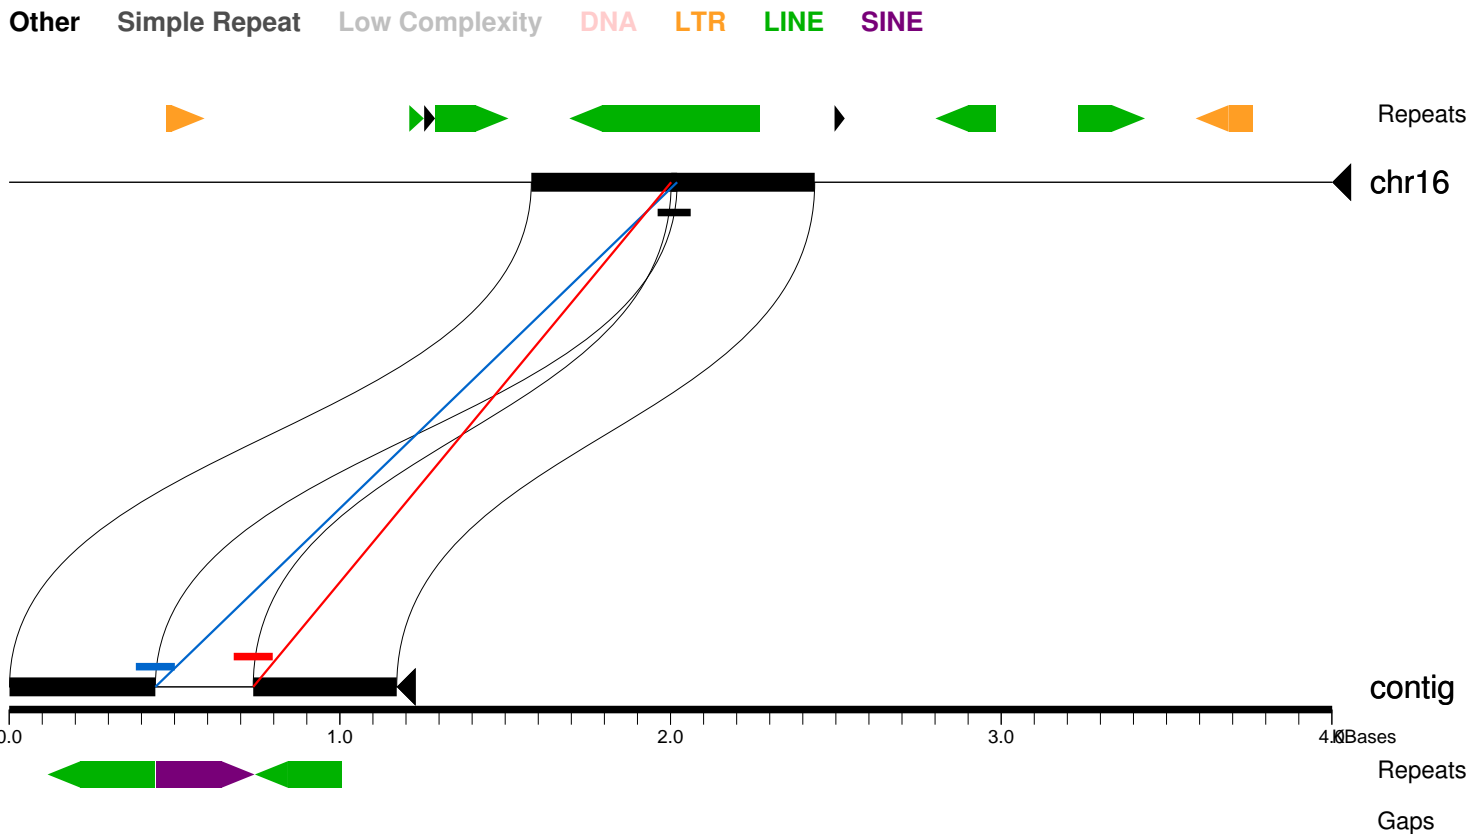

siteID: chr16\_23865299 Scafftig5 + Breakpoint: chr16:23865288

chr16:23865236-23865344

Overlap Length: 8 INS size: 421 Genotyped: No

```
left  AT-TCAGCATGGCTGGGG-----AGGCCTCACAATCATGGCAGAAGGCAAAGGAA--GGTCAAGGCAC
chrom AT-TCAGCATGGCTGGGG-----AGGCCTCACAATCATGGCAGAAGGCAAAGGAA--GGTCAAGGCAC
right TGATCCGCCCCGCTCGGCCTCCCAAAGTGCTGGGATTACAGGCCTGAGCCACCGCGCCCGGC*CAAGGCAC
      111**1**11*1**1**11111111**11**111*1*111***111**1**11*11111**1*****
```

```
left  NNNNNNNNNNNNNNNNNNNNNNNNNNNNNNNNNNNNNNNNNNNNNNNNNNNNNNNNNNNNNNNNNNNNN
chrom TTCTTACATGGCAGCAGGCAAGAGAGCGTGCACAGGGGAACTGCCCTTT-----
right TTCTTACATGGCAGCAGGCAAGAGAGCGTGCACAGGGGAACTGCCCTTT-----
      22222222222222222222222222222222222222222222222222222222222222222222
```

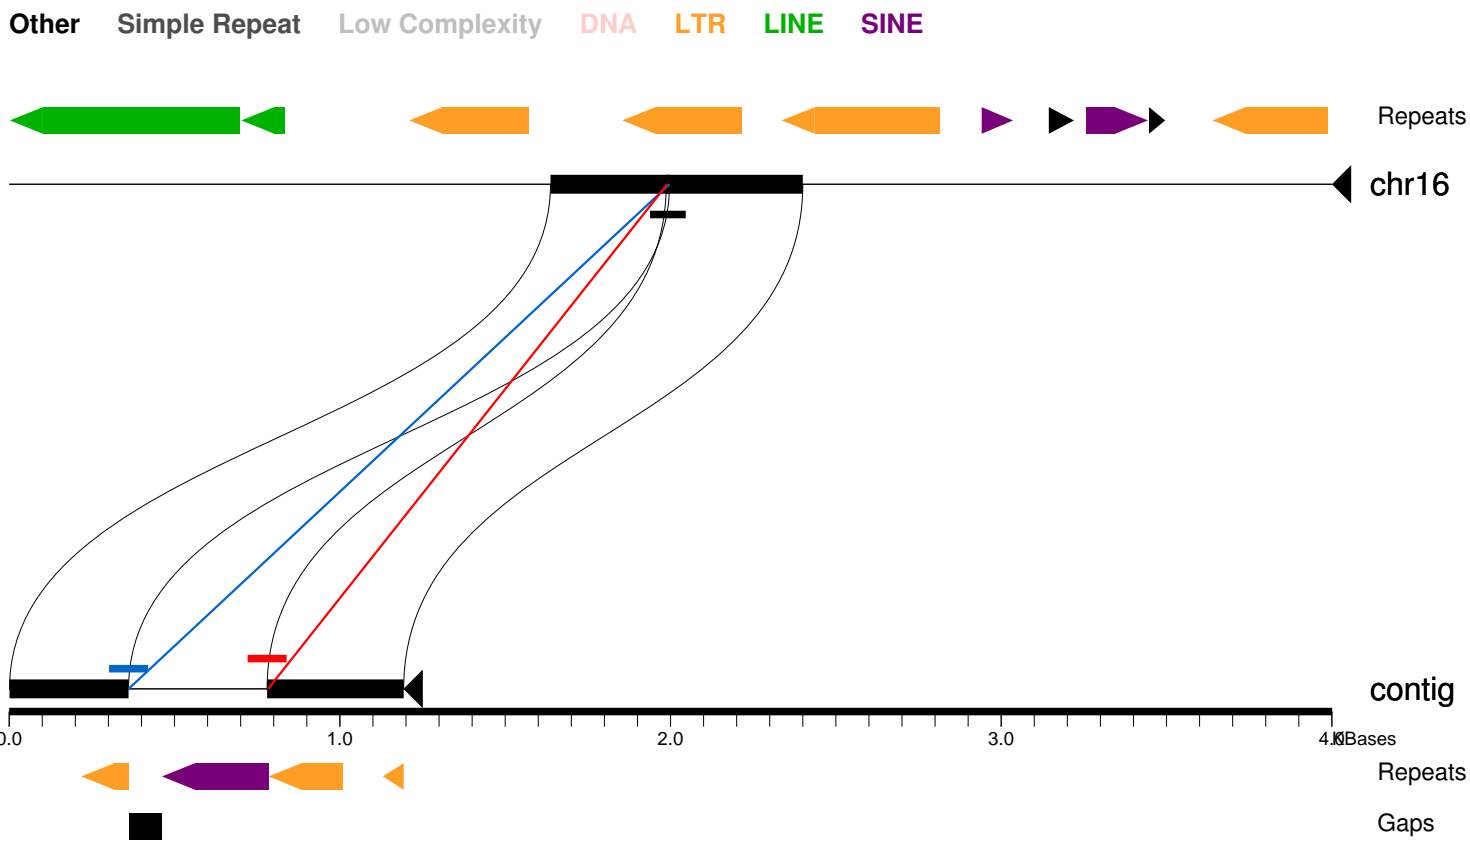



siteID: chr16\_61092186 Scafftig1 + Breakpoint: chr16:61092191

chr16:61092139-61092250

Overlap Length: 8 INS size: 425 Genotyped: No

```
left  GGAGAACA--CTTGAACAACAAAAGCCAT---CTTATATATTTGTCCTCACAGATAC---CCTACAACNN
chrom GGAGAACA--CTTGAACAACAAAAGCCAT---CTTATATATTTGTCCTCACAGATAC---CCTACAACCTA
right ATCCACCCGCTCGGCCTCCCAAAGTGCTGGGATTACAGGCGTGAGC-CACCGCGCCCGGCCTACAACCTA
      1111*1*111**1*11*11*1****111*1111***1*1111**11*1***1*111*111*****22

left  NNNNNNNNNNNNNNNNNNNNNNNNNNNNNNNNNNNNNNNNNNNNNNNNNNNNNNNNNNNNNNNNNNNNNNNNN
chrom TCTTAAGTCAAGATGAAAAAGAGAAAAAAGTTGTGATGATGACACACGCA-----
right TCTTAAGTCAAGATGAAAAAGAGAAAAAAGTTGTGATGATGACACACGCA-----
      22222222222222222222222222222222222222222222222222222222222222222222
```

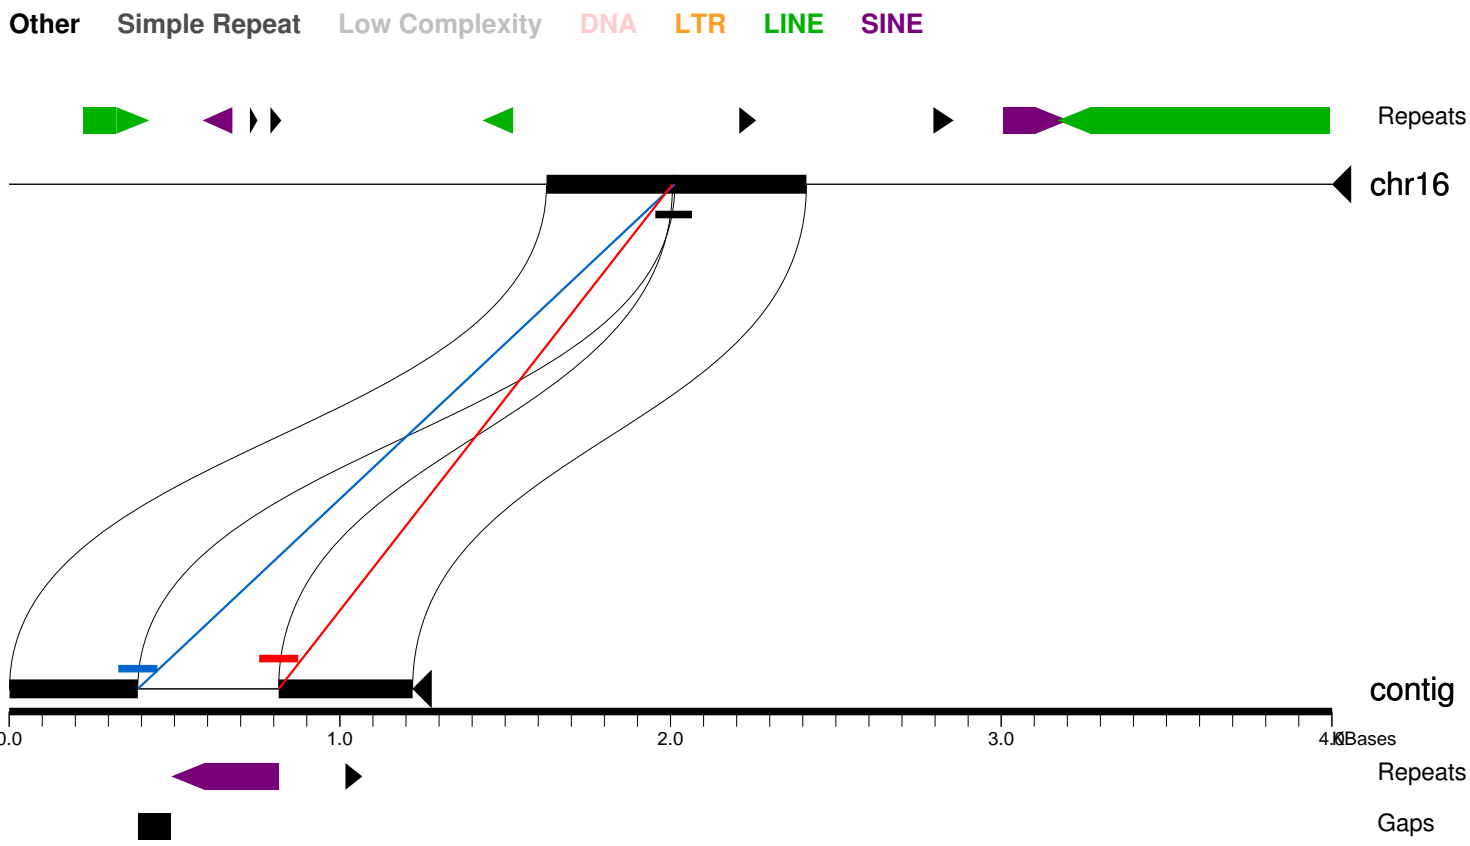

siteID: chr16\_65482207 Scaffoldig2 + Breakpoint: chr16:65482188

chr16:65482145-65482247

Overlap Length: 17 INS size: 298 Genotyped: Yes

```
left T-----ATCAGAAACTGGTGAGTTTCTAACAAGAATTTACC---CTAAACACAGAAAAACAAT
chrom T-----ATCAGAAACTGGTGAGTTTCTAACAAGAATTTACC---CTAAACAAGAAAAACAAT
right CCGCCCCGCTCGGCCCTCCCAAAGTGCTGGGATTTAAAGGCGTGAGCCACCGCGCCCGGCCAGAAAAACAAT
1111111111111111111111***11***1***1***1***1***1***111111111111***111***111***1111111*1*****
```

```
left TTTTTFTTTTTTTTTTTTTTTTTTTTGAGACGGAGTCTCGCTCTGTCGCCAGGCTGGAGTGCAGTGG
chrom TTTTTFATA-----AAATAGGGCTTACTTCTGGAAGGCAGGATAATGCACAGAAC
right TTTTTFATA-----AAATGGGGCTTACTTCTGGAAGGCAGGATAATGCACAGAAC
*****22222222222222222222*2*2N*2*22*222*****22222*****2*222*22***222
```

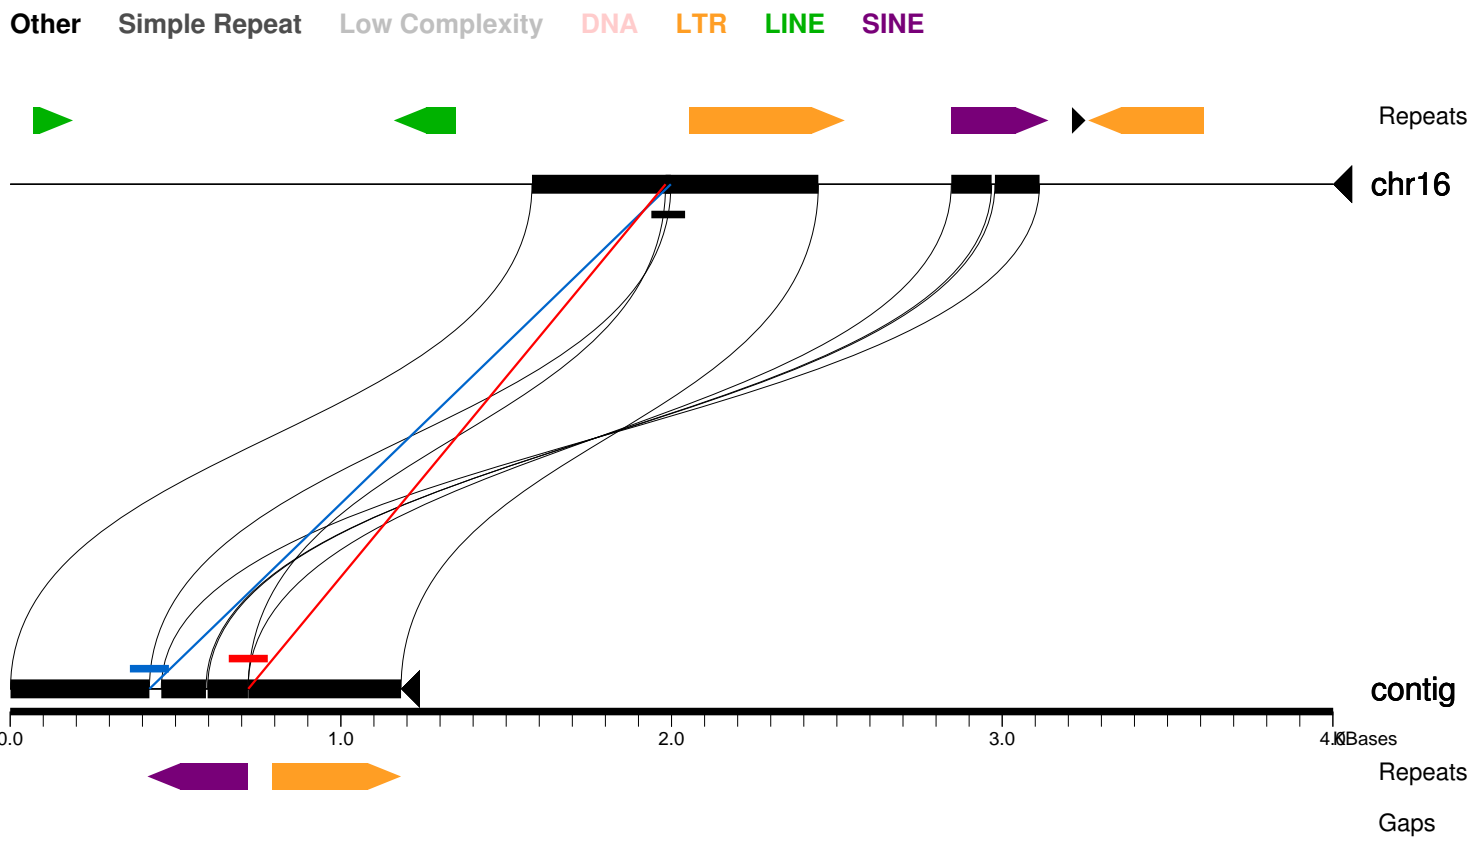

siteID: chr16\_7226227 Scaffitig3 + Breakpoint: chr16:7226224

chr16:7226178-7226283

Overlap Length: 14 INS size: 300 Genotyped: Yes

```
left  ACTGTGTTAGCTTTGGTTAATGAAACTG-TAAAAATGAGATTAATAAT-----AATACTTG
chrom ACTGTGTTAGCTTTGGTTAATGAAACTG-TAAAAATGAGATTAATAAT-----AATTCTTG
right CC---GCCCGCCTCGGCCTCCCAAAGTGCTGGGATTACAGGCGTGAGCCACCCGCGCCCGGCCAATACTTG
      1*111*111**1*1**111111***1**1*111**1*1*1111*1*1111111111111111***N****
```

```
left  GTTCTTTTTTTTTTTTTTTTTTTTTTTTGGAGACGGAGTCTCGCTCTGTCGCCCAGGCTGGAGTGC--AGT
chrom GTTCTTAAAAATCATGGATAGGATT--ACATGAGATAATGCA-TGTA-----AGTGCTTAG-
right GTTCTTAAAAATCATGGATAGGATT--ACATGAGATAATGCA-TGTA-----AGTGCTTAG-
      *****2222*22*222*2222**22*2*2*222*222**22***222222222222*****22*2
```

Other Simple Repeat Low Complexity DNA LTR LINE SINE

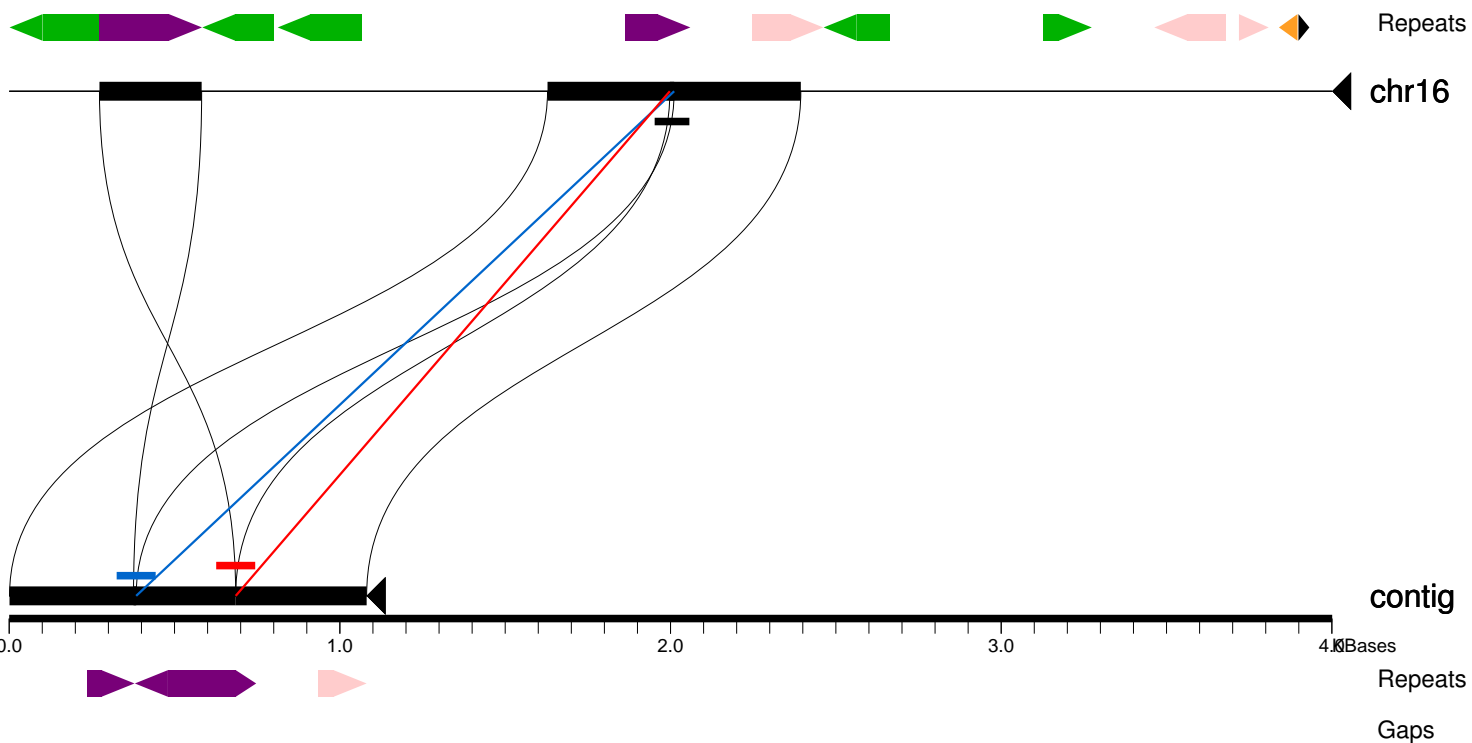

siteID: chr16\_75655160 Scafftig8 + Breakpoint: chr16:75655155

chr16:75655117-75655214

Overlap Length: 16 INS size: 305 Genotyped: Yes

```
left  C-----TTTCTGGACAGATGTTCTTA-----TCTGTCTTCTTTTTTC--CAGGCATTTTATT
chrom C-----TTTCTGGACAGATGTTCTTA-----TCTGTCTTCTTTTTTC--CAGGCATTTTATT
right CCGCCCGCCTCGGCCTCCCAAAGTGCTGGGATTACAGGCGTGAGCCACCGCGCCCGGCCGGCATTTTTATT
      *111111111111111111*1*111*11*1**111***1111111*11*1*11*11111*11*1*****
```

```
left  TTTCTTTTTTCTTTTTTTTTTTTTTTTTTTTGGAGACGGAGTCTCGCTCTGTTCGCCAGGCTGGAGTGCAGTG
chrom TTTCTCCTTTCC-----CCTACAG-CAGAGTGTCTCTACCGCCC----TCTAGTAAA---
right TTTCTCCTTTCC-----CCTACAG-CAGAGTGTCTCTACCGCCC----TCTAGTAAA---
      ****22****2222222222222222*22**2*2****2*22****22****2222*22***22*222
```

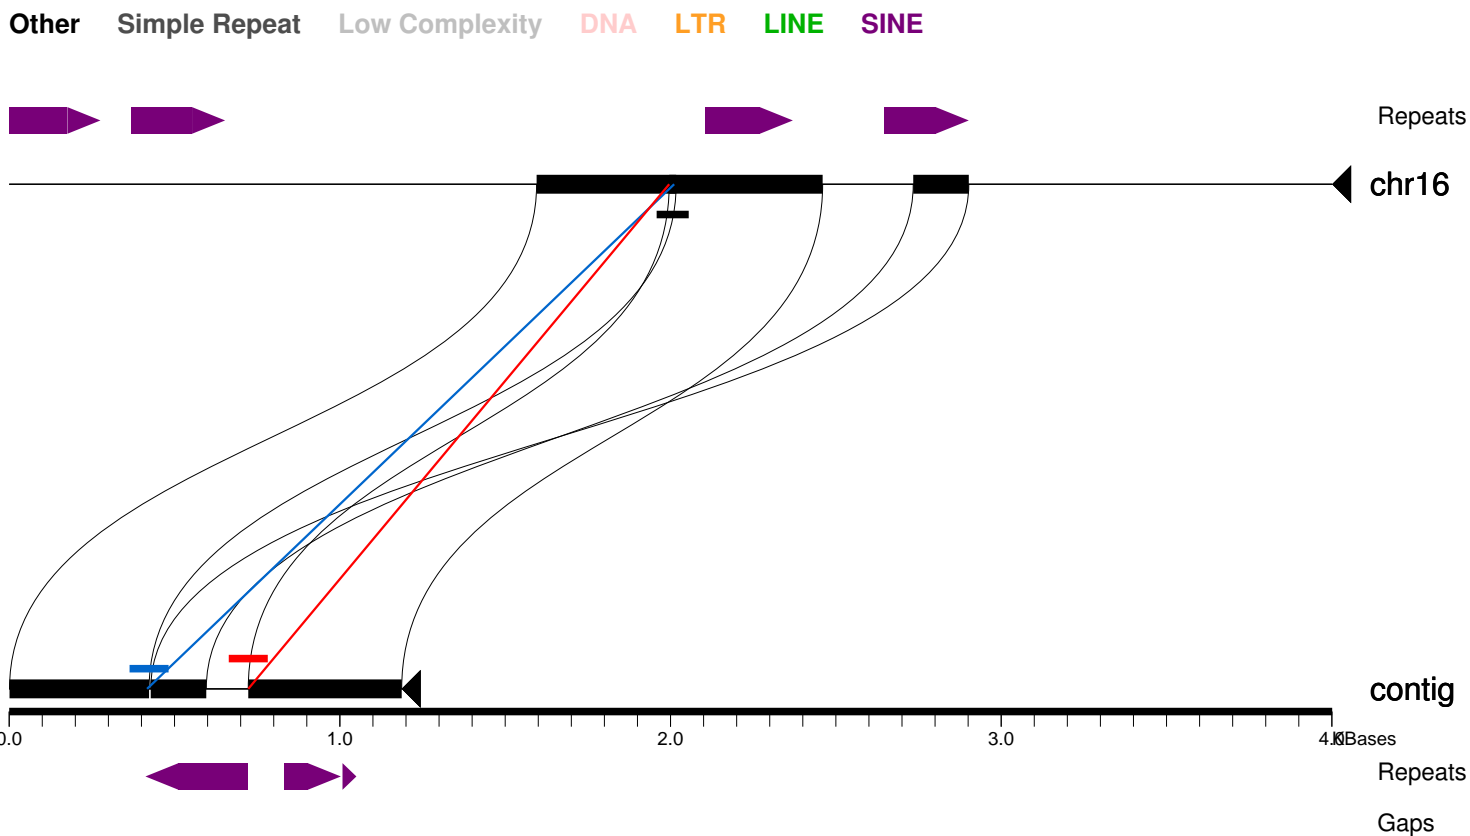





siteID: chr16\_80217433 Scafftig6 - Breakpoint: chr16:80217431

chr16:80217380-80217484

Overlap Length: 9 INS size: 312 Genotyped: Yes

```
left  CACA-----AAAGACAAATGCTGCGTGATCTCACTTATAGGTGGTATCTTAAGAAGTCAAA
chrom CACA-----AAAGACAAATGCTGCGTGATCTCACTTATAGGTGGTATCTTAAGAAGTCAAA
right TGC ACTCCAGCCTGGGCGACAGACCGAGACTCCGTCTCAAAAAAAAAAAAAAAAAAAAAAAAAAAATCAAA
      11**11111111111111111111*1****11*11**1***1111111*111*1*111111*1111**1**1****
```

```
left  TTCAGGCCGGGCGCGGTGGCTCACGCCTGTAATCCAGCACTTTGGGAGGCCGAGGCGGGCGG-
chrom TTCA---CAGAAGCAGAG---AAC-----AAT---AGAATGATGGTTGCCTGGGACTGGGGGC
right TTCA---CAGAAGCAGAG---AAC-----AAC---AGAATGATGGTTGCCTGGGACTGGGGGC
      ***222*2*22**2*2*2222**222222**1222**2*222***22*2*2*2*2*2**2**2
```

Other Simple Repeat Low Complexity DNA LTR LINE SINE

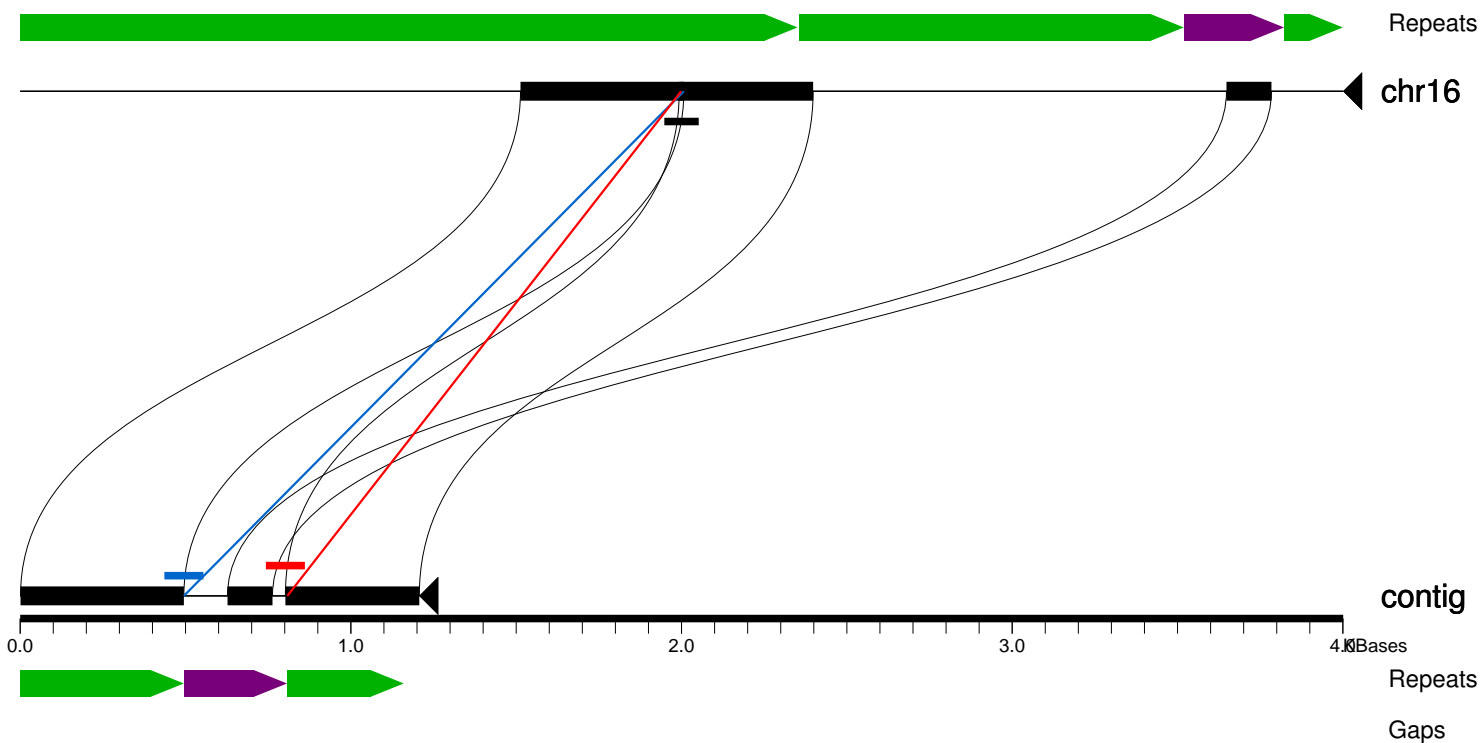

siteID: chr16\_80848071 Scafftig3 - Breakpoint: chr16:80848060  
 chr16:80848018-80848119  
 Overlap Length: 18 INS size: 307 Genotyped: Yes

```
left  A-----GACATT---ATA-TCAT-CTCATCTGAAAGTGTCATA--TGTATCTCTAAATAAGAAT
chrom A-----GACATT---ATA-TCAT-CTCATCTGAAAGTGTCATA--TGTATCTCTAAATAAGAAT
right CCAACCTGGGCGACAGAGCGAGACTCTTTCTCAAAAAAAAAATAAATAAATAAATAAATAAAATAAATAAATAAAGAA
1111111111111***11111*1*1*1*1***1111**1111*1***11*11*111******
```

```
left  TGTTCCTGCCGGGCGCGGTGGCTCACGCCTGTAATCCAGCAGTCTTTGGGAGGCCGAGGTGGGCGGA
chrom TGTTCCTTTAAAT----GTAAC-CACGACT-----CCATCATT-----ACACCTAAATTCACAC-
right TGTTCCTTTAAAT----GTAAC-CACGACT-----CCATCATT-----ACACCTAAATTCACAC-
*****2222222222**22*2****2**222222***2**2*22222*22**2*22*222*222
```

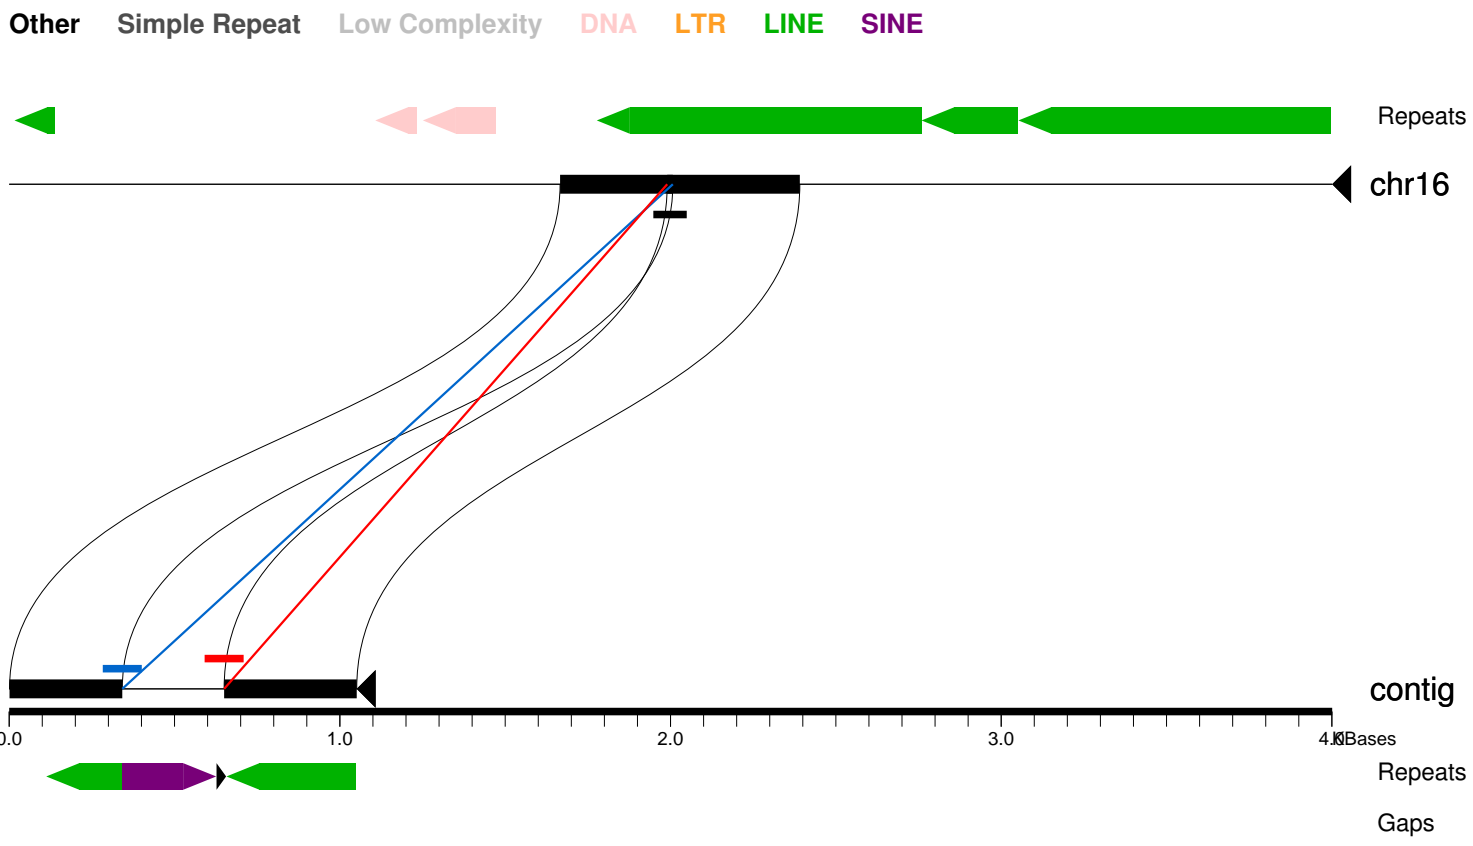

siteID: chr16\_82164694 Scafftig9 - Breakpoint: chr16:82164679

chr16:82164519-82164850

Overlap Length: 12 INS size: 291 Genotyped: Yes

```
left -----ATACACACACACATATATGAAATTTGTAATTTACCTAGAGCACTCAAAAACAATTTTGAA
chrom GCGTATATACACATACACACACATATATGAAATTTGTAATTTACCTAGAGCACTCAAAAACAATTTTGAA
right GG--AGAATGGCGTGAACCCGGG-AGGCA-GAGCTTGAGCAGCCGAGATCGCGCCACTGCACTCC---
      2N 2N2NNNN21*11**1*1111*111*1**11***1*11111**1***1*1*1*1*1111*1*11111
```

```
left AAGAAAGGACAAAGTTGGATAAAATACACTACTGTAGTTCAAGACTTAATATAAAAGCTGCAGTCATCAAGA
chrom AAGAAAGGACAAAGTTGGATAAAATACACTACTGTAGTTCAAGACTTAATATAAAAGCTGCAGTCATCAAGA
right -AGCCTGGGC-----GACAGA-ACAAGACTCCGTCTCAAAA---AAAAAAAA-----AAAA
      1**111**1*1111111**1*1*1***11***11111***1*111**1*1***111111111111**1*
```

```
left TAGGTAAATATTAGTGTAAAGATGGACACATGT-----CACACC----TGT-----AATCC
chrom TAGGTAAATATTAGTGTAAAGATGGACACATGTGATAAATGGAGCAGAACAGAGTGTCCAGAAATAAATCC
right AA---AAAAA-----AAAATGGACACATGGATAAATGGAGCAGAACAGAGTGTCCAGAAATAAATCC
      1*111***1*1111111**1*****N**2222222222**2*212222***222222222*****
```

```
left -CAGCA-CTTTGGGAGG-CCGAGG-----CGGGCGGATCACGAG--GT-----CAGGAGATCGAGAC
chrom ACAGCAGCGTAATCAGTACCAAGGATAGTCTGTAGGGAAAAAGTGTGGTGTTTTAACCAGTAGCACTAGAG
right ACAGCAGCGTAATCAGTACCAAGGATAATCTGTAGGGAAAAAGTGTGGTGTTTTAACCAGTAGCACCAGAG
      2*****2*2*2222**22**2***222N2*2*22**222*2*2*22**22222222***2**22*N***2
```

```
left CATCCTGGCTAACACGGTGAACCCCGTCTCTACTAAAAATACAAAAAATTAGC-
chrom CAAC-TGAATATTTGTATGAAAAACAAAAACAAAC--AAAAACCAGGAATCTCAGCC
right CAAC-TGAACATTTGTATGAAAAACAAAAACAAAC--CAAACCAGG-----
      **2*2**221*222222*****2*2222*222**221***2222211NN1N111
```

Other Simple Repeat Low Complexity DNA LTR LINE SINE

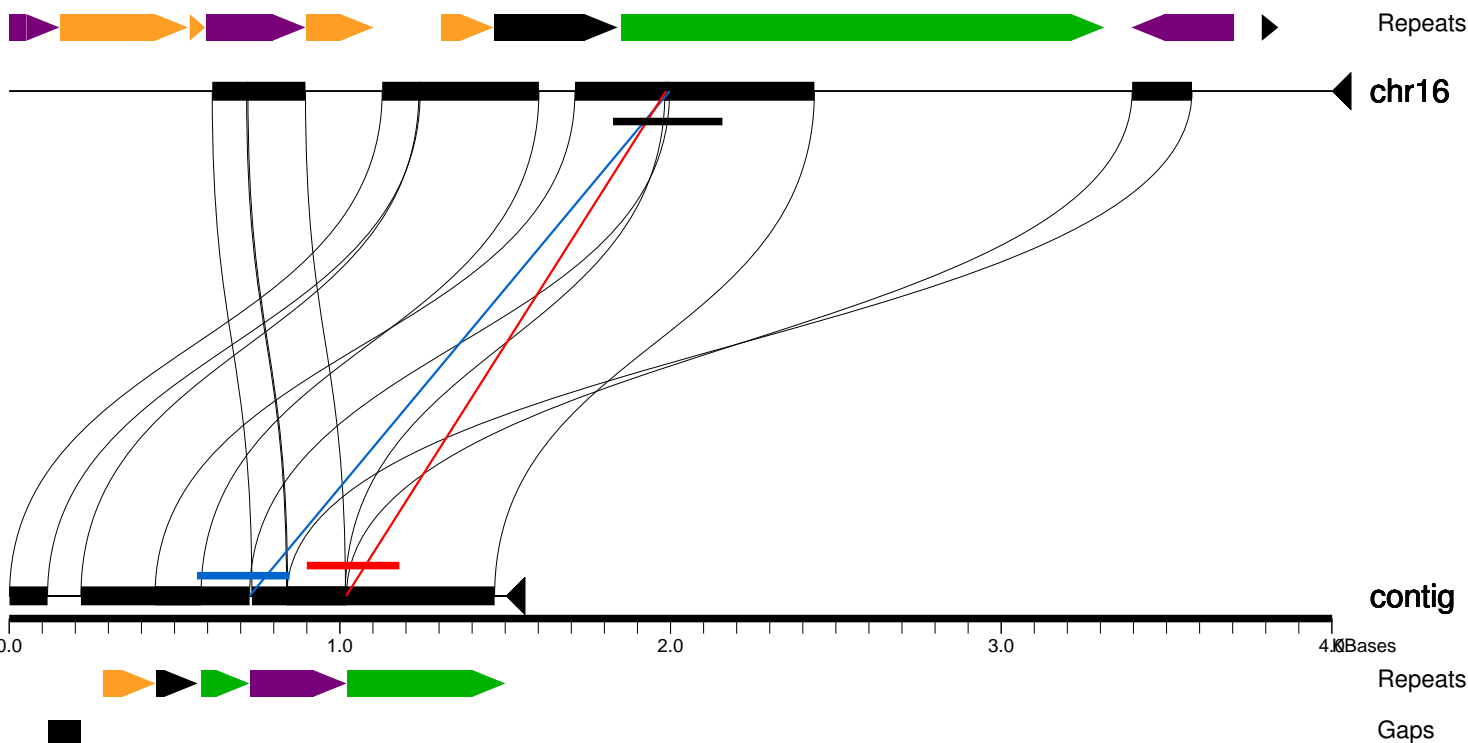



siteID: chr16\_82912119 Scafftig2 - Breakpoint: chr16:82912113

chr16:82912056-82912162

Overlap Length: 3 INS size: 311 Genotyped: Yes

```
left  CA-CACAGATACATTTTCAGTAAGGTTG--TCTCTGTTACTTGAGGCTTACAAGAAGGAAA-----G
chrom CA-CACAGATACATTTTCAGTAAGGTTG--TCTCTGTTACTTGAGGCTTACAAGAAGGAAA-----G
right CTGCACTCCAGCGTGGGCGACAGAGCGAGACTCCGTCTCAAAAAAAAAAAAAAAAAAAAAAAAAAAAAAAAG
      *11***11111*1*1111*11**111*111***1**11*111*11111*1**1**11***111111111*
```

```
left  AAGGCCGGGCGCGGTGGCTCACGCCTGTAATCCCAGCACTTTGGGAGGCCGAGGCGGGCGG
chrom AATTCC---CTCTCTAAA-CACAC-TCTAAACACA-CA-----GGAGTT-GAGAACGGGGA
right AATTCC---CTCTCTAAA-CACAC-TCTAAACACA-CA-----GGAGTT-GAGAACGGGGA
      **22**222*2*22*2222***2*2*2***2*2**2**22222***222***222**2*2
```

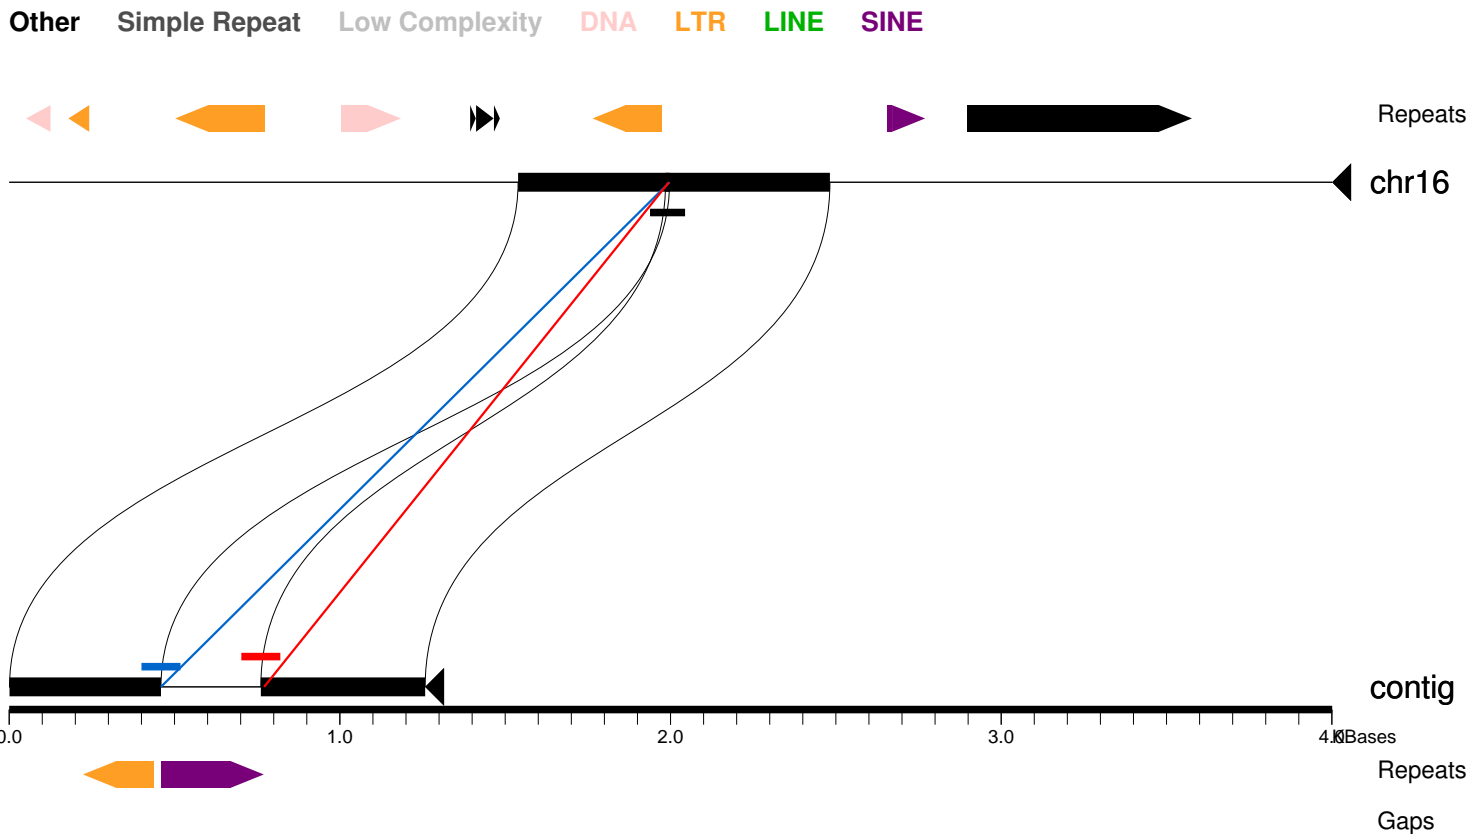

siteID: chr16\_83666364 Scafftig4 - Breakpoint: chr16:83666361

chr16:83666315-83666420

Overlap Length: 14 INS size: 319 Genotyped: Yes

```
left  A--AGAATTCAGGGCGAG-----TCCATAGAGTAAAGTGAA---AGCAAGTTTATTAAGAAAGTAAA
chrom A--AGAATTCAGGGCGAG-----TCCATAGAGTAAAGTGAA---AGCAAGTTTATTAGAAAAGTAAA
right CCTGGGCGACAGAGCGAGACTCCGTCTCAAAAAAAAAAAAAATAAATAAAAAAAAAAAAAAAAAAAGAAAAGTAAA
      1111*1111***1*****11111111**1*1*1*11***1*1**111*11**1111*11*****
```

```
left  GGAAGGCCGGGCGCGGTGGCTCACGCCGTGTAATCCCAGCACTTTGGGAGGCCGAGGCGGGTGG
chrom GGAATAAAAAGAATGGCTGCTC-----TATAGGCAGAGCAAC-----AGCATGAG-CTGCT--
right GGAATAAAAAGAATGGCTGCTC-----TATAGGCAGAGCAAC-----AGCATGAG-CTGCT--
      **222222*222**22*****22222*2**22*22*****222222**222**2*2*2*22
```

Other Simple Repeat Low Complexity DNA LTR LINE SINE

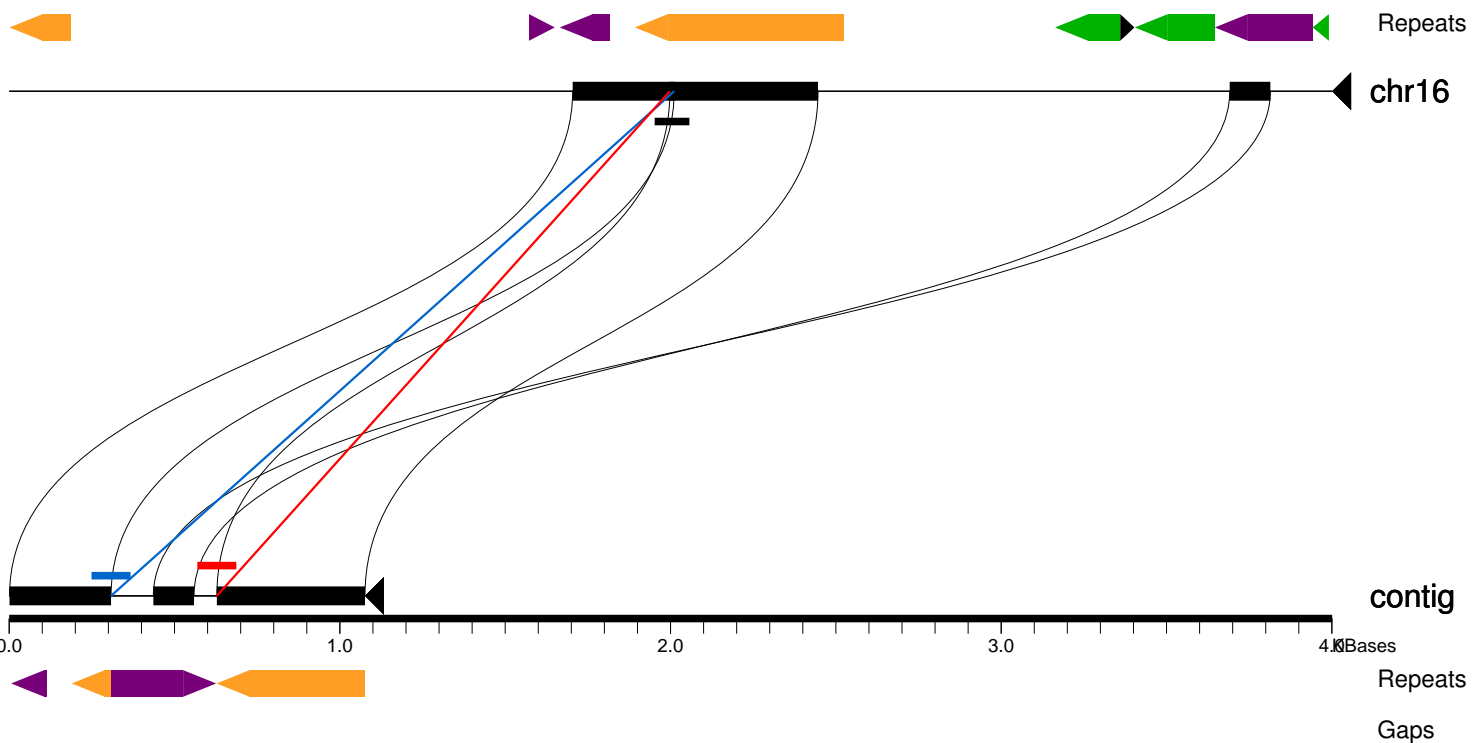

siteID: chr16\_8418198 Scaffitg3 + Breakpoint: chr16:8418180

chr16:8418020-8418356

Overlap Length: 17 INS size: 295 Genotyped: Yes

```

left    AA-----CTGCATGGGTTCCTTTTGTATAGGTTGCCCAAAATTTCCACAAGGGTATGTT
chrom   AAGATGCCGAAGGAAAACCTGCATGGGTACTTTTTGTATAGGTTGCCCAAAATTTCCACAAGGGTATGTT
right   ----TGAGGCAGGAGAATGGCGTGAACCCGGGAGGCGGAGCTTGC-----AGTGAGCCGAGA-----
11    22NN2N2222N2211**1**111N*11111*111**1***111111*1*1111*1**11111111

```

```

left    TTACTTCAAAGCTTCTGCAAAGCAAGAAGGGCCAAATGGTTGATGACCCCTCTTGAATGAGGCAGATGAA
chrom   TTACTTCAAAGCTTCTGCAAAGCAAGAAGGGCCAAATGGTTGATGACCCCTCTTGAATGAGGCAGATGAA
right   TCGCGCCA-----CTGGACCCAGCCCTGGGCGACAGAGCGAGACTCCGTCT-----CAAAAAA
*1*11**1111111***1*111**1111***1*1*11*1111111***1***111111111***1*11**

```

```

left    CAAACAGATTCTTGACTACAAGAAGCTAACATAAGGCGGGCGCGGTGGCTCACGCCTGTAATCCCA--
chrom   CAAACAGATTCTTGACTACAGAAGCTAACATAAGGTAGGTATTA-TTACTAACTCCATCAGACAGATG
right   AAAAAA-----AAGAAGCTAACATAAGGTAGGTGTTA-TTACTAACTCCATCAGACAGATG
1****1*1*11111111111***1*****1***22**2N2222*22**2**2**222*22*22*22

```

```

left    --GCACT----TT--GGGAGGCCGAGGC-----GGCGGATCAC-GAG---GTCAGGAGATCGAGACCAT
chrom   AAGAACTGGGGTTCAGGGAGGTAAAGTAACTAAGTCAAGGTTCACAGAGCATGTATCTATATATGGAAAAC
right   AAGAACTGGGGTTCAGGGAGGTAAAGTAACTAAGTCAAGGTTCACAGAGCATGTATCTATATATGGAAAAC
22*2***2222*22*****222*2222222*2222*2*****2***222**2222*2**222**22*2

```

```

left    CCCGGCTAAAA-CGGTGAAACC---CCGTCT-----CTACTAAA-----
chrom   CCAGGCTTCTGGCTTTCAAAAACCTACCCTTCTAGTTTLAGCTA-TAAATGTGTGATTGAGT
right   CCAGGCTTCTGGCTTTCAAAAACCTACCCTTCTAGTTTLAGCTA-TAAAT-----
**2***22222*22*2**2*222*2**222222**2**2**2

```

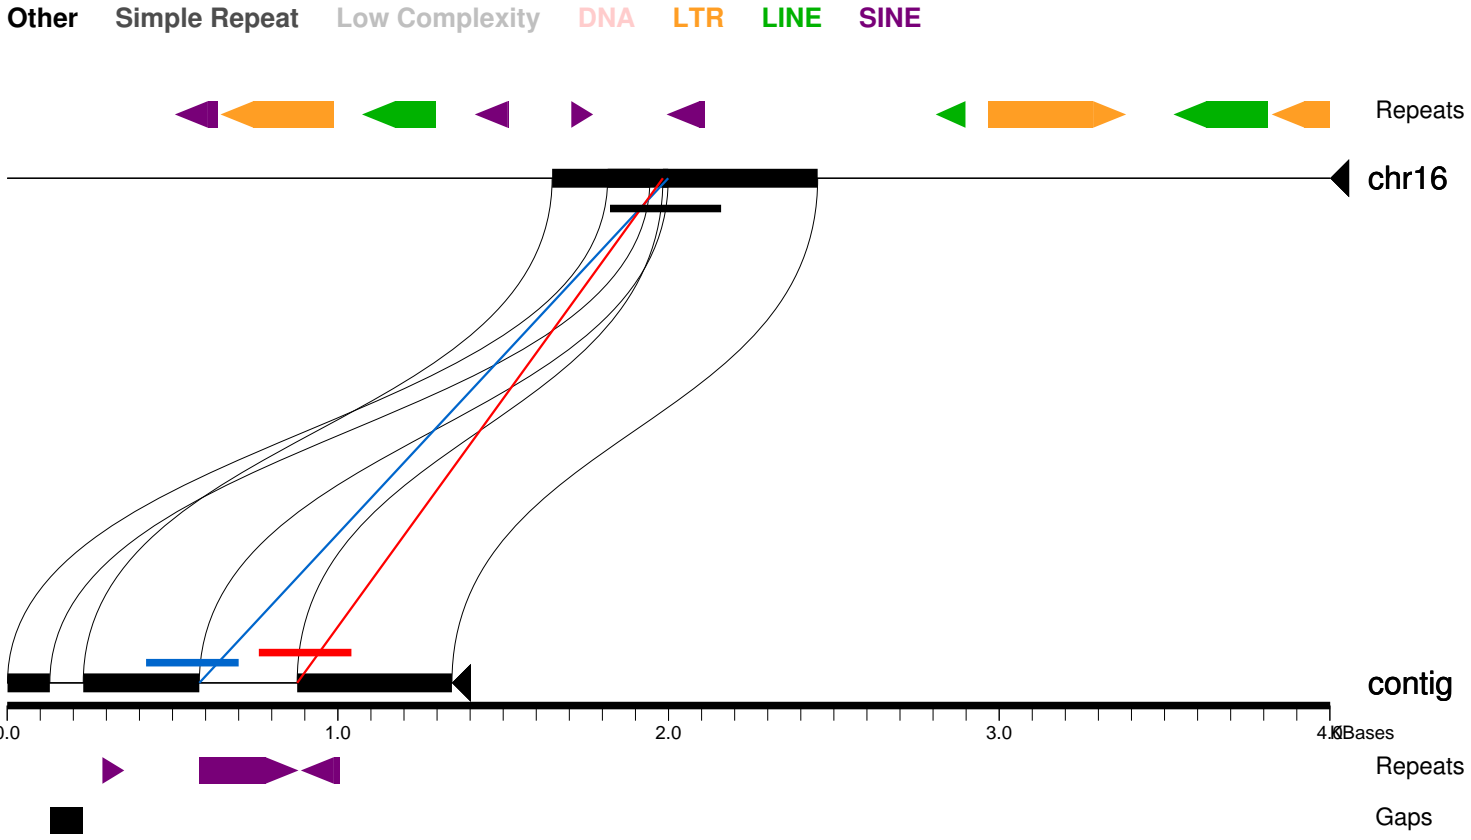

siteID: chr16\_85108692 Scafftig2 + Breakpoint: chr16:85108693

chr16:85108533-85108868

Overlap Length: 16 INS size: 315 Genotyped: Yes

```
left CT----TATATAAGTAACGTTGGGGAGGGAGGGGATTAAAGTCCCAACCCCTGCCAAAAACACAAAAATTCT
chrom TTGTCCTATATAAGTAACGTTGGGGAGGGAGGGGATTAAAGTCCCAACCCCTGCCAAAAACACAAAAATTCT
right TTT-----AGTAGAGACGGGGTTTCACCGTGTTA--GCCAGGATGGTCTCGAT-CTCCTGACCTCG
2*N 111111****11*11****1111*11*11***11*1*111*111*11*1*11*11**1
```

```
left TGCCATCACTTGGTCCCTGAGCATATATATGTTTGTATAGTTGCAAAAAACAAA-GTGAAACAAAAACCCT
chrom TGCCATCACTTGGTCCCTGAGCATATATATGTTTGTATAGTTGCAAAAAACAAA-GTGAAACAAAAACCCT
right TG--ATCCGCCCG--CCTCGGCCTCCCAAAGT-----GCTGGGATTACAGGCGTGAGCCACCGCGCCC
**11***111111*11***11**1*1111*1**1111111*1**11*11***111****11**111111**1
```

```
left TTTACTATTTAGACAATATGGGATTTTTTAGTTTTAT-----TTTATTTTATT-----
chrom TTTACTATTTAGACAATATGGGATTTTTTAGTTTTATTAATCTTTAGTTTGTAAACATCTAAAGTAAAAA
right G-----GCC-----GATTTTTTAGTTTTATAATCTTTAGTTTGTAAACATCTAAAGTAAAAA
111111111111*1*1111111******2222****2**2**222222222222222222
```

```
left -TTA--TTTTATTTTTATTTTTTTTTTTGAGACGGAGT-CTCGCTCTGTCGCCCAGGCTG-----G
chrom GTTAAATTTTTACTTTTTAGTCTTTTTAT-AGTTTTATTACTAGTTTAGTTGATTAGTTTTTTATATAAAAAAG
right GTTAAATTTTTACTTTTTAGTCTTTTTAT-AGTTTTATTACTAGTTTAGTTGATTAGTGTTTTTATATAAAAAAG
2***22****2****2*2****2*2**2222*2*2**2*2*22**2*222**2N*222222222222*
```

```
left AGTGCAGTGGCGCGATCTCGGCTCACTG-CAAGCTC----CGCCTCC-----
chrom ATAAAAATGGCC---TTTAATCCCCTGCTAGATAATTTCTTTTGACTTGTAAAGTAATA
right ATAAAAATGGCC---TTTAATCCCCTGCTAGATAATTTCTTT-----
*2222*2****2222*2*222*2****2*2**2*22222*222*NN1
```

Other Simple Repeat Low Complexity DNA LTR LINE SINE

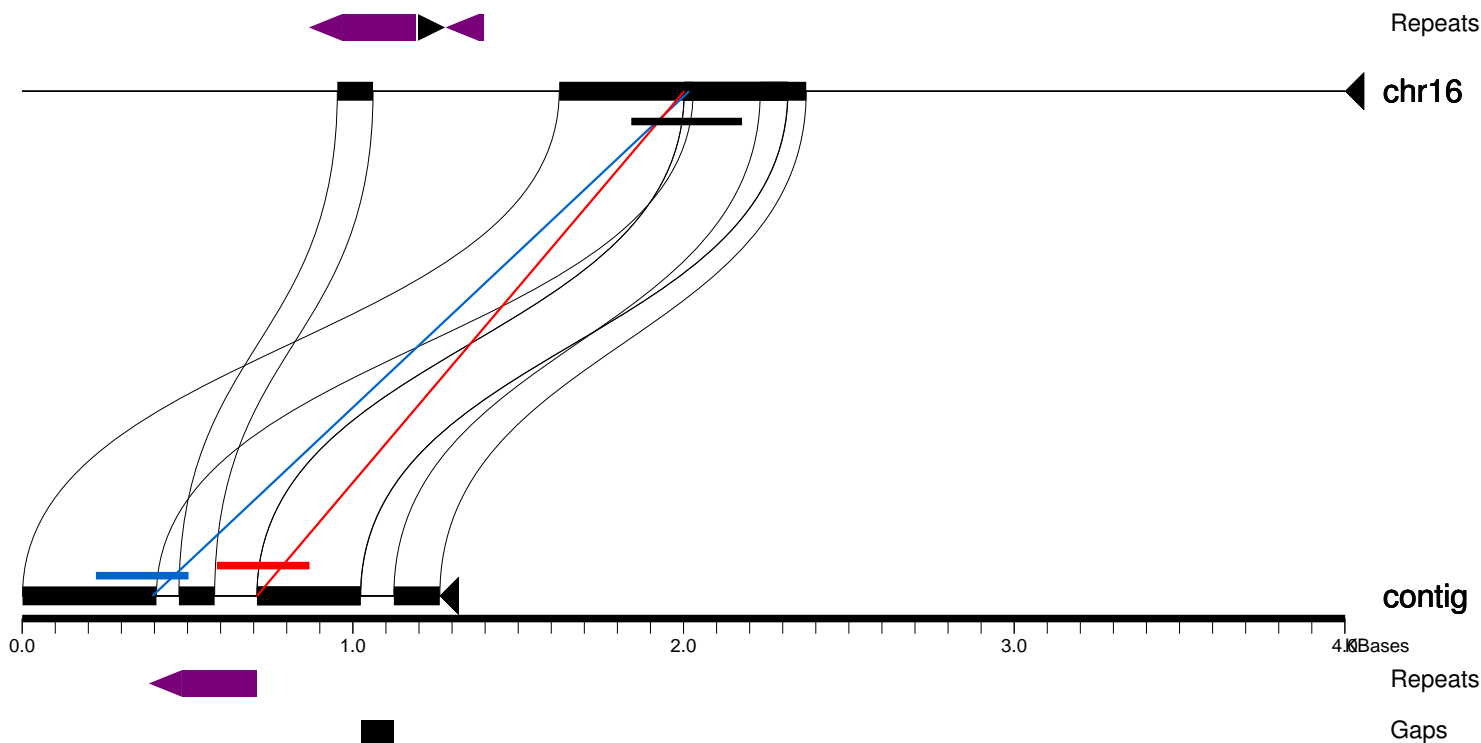



siteID: chr16\_87191672 Scafftig3 + Breakpoint: chr16:87191662

chr16:87191613-87191721

Overlap Length: 11 INS size: 312 Genotyped: Yes

```
left CAATACCCCACAAGCAC--AA---GCAACCAAAGCAAAAAATGGACAAATG-----GGATCACCTCAAGTT
chrom CAATACCCCACAAGCAC--AA---GCAACCAAAGCAAAAAATGGACAAATG-----GGATCACCTCAAGTT
right CCGCCCGCCTCGGCCTCCCAAAGTGCTGGGATTACAGGCGTGAGCCACCGCGCCCGGCCACCTCAAGTT
      *1111*1**1*111*1*11**111**1111*111**1111**11*1*11*11111**11*****
```

```
left TTTTTTTTTTTTTTTTTTTTTTTTTTTTTTTTTTTTGGAGACGGAGTCT-CGCTCTGTCGCCAGG
chrom AAAAAAGCTTCTGCACAGCAA-----AGGAAAC--AATCAACAAAGTGATGAGACAA
right AAAAAAGCTTCTGCACAGCAA-----AGGAAAC--AATCAACAAAGTGATGAGACAA
      2222222**2*222222222222222222222222**2**22*2**22*2222**22*222222
```

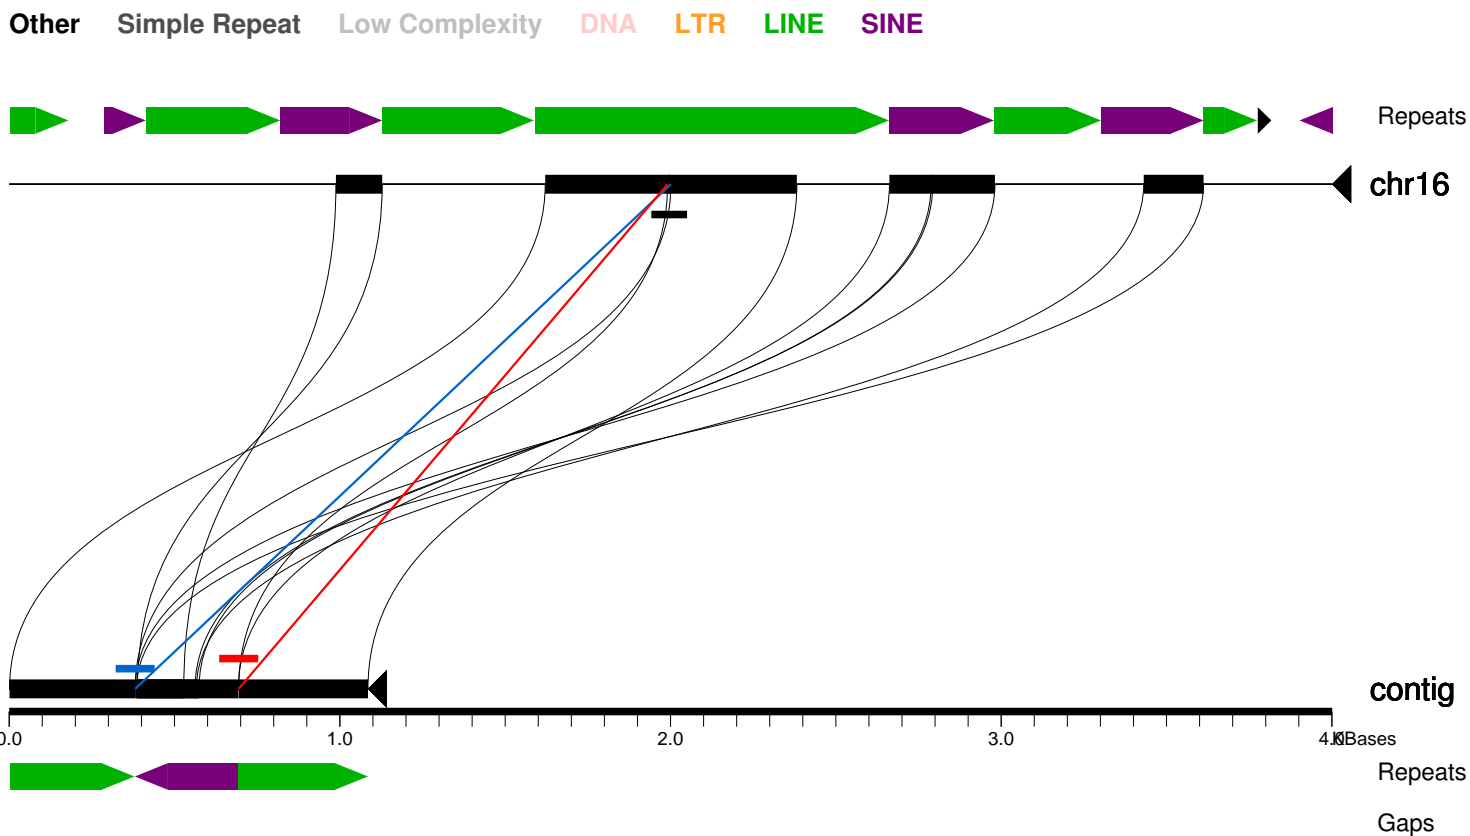

siteID: chr17\_13045148 Scaffitg3 + Breakpoint: chr17:13045143

chr17:13044983-13045315

Overlap Length: 13 INS size: 308 Genotyped: Yes

```
left  A-----ATGGACTTTCTCTAGGAAAGTTAAAGGAGAACTTCATTTATTGTACC-ATGTTATG
chrom ATGGCTTGGCCACAATGGACTTTCTCTAGGAAAAGTTAAAGGAGAACTTCATTTATTGTACC-ATGTTATG
right TTCAGTAGAG----ACGGGGTTTCACC-----GTTTTAGCCGGG-----ATGGTCTCGATCTCCTG
      12NNN2N2NN      *1**11***1*1111111***11**11*1111111111***1**11*1**1*11**
```

```
left  AT-TAGTGTGCTCCA-CTACACCCTCAAATAGTATTTTTAAGGCTCAAATTTTTATTGTAGACATAACT
chrom AT-TAGTGTGCTCCA-CTACACCCTCAAATAGTATTTTTAAGGCTCAAATTTTTATTGTAGACATAACT
right ACCTCGTGATCCGCCCGCCTCGGCCTCCCAAAGTGCTG----GG-----ATTACAGGCGTGA--
      *11*1**1*1*1**11*11*11***11*1**11*111111**111111111111***11**1*1*1*11
```

```
left  TTTAGATTTTGGACTATTAGAAGGGCCGAATCTTTCCTT-----TTTTTTTTTTTTTTTTT-----T
chrom TTTAGATTTTGGACTATTAGAAGGGCCGAATCTTTCCTT-----TTTTTTTTTTTTTTTTT-----T
right -----GCCACCGCGCCC*GCCCAAATCTTTCAAACAACCTCTGGCTGCATTTGGATAGCAAAGACT
      111111111111*1*111111*111*1***1*****2222222*2*222*222***222*2222222222*
```

```
left  TTTTTTTTTTTTGGAG--ACGGAGTCTCGCTCTGTCGCCCAGGCTGGAGTG-----CAGTGGCGG-----
chrom TCTATGTCATTGAGTAATTAAGCCATGCATTCTTGTGCAGGATTATATGATAACCATTCATAACTTCTTA
right TCTATGTCATTGAGTAATTAAGCCATGCATTCTTGTGCAGGATTATATGATAACCATTCATAACTTCTTA
      *2*2*2*22*****22*222**2*22**22*2*2*22*****2*2222**22222**2*222222222222
```

```
left  -GATC-----TCGGCTCACTGCAAG--CTCCGCCTCCCGGGTTCACG--CCATTC
chrom AGATCCTTTCCCTCCTTTTGTGTTGCCATAACCTTTACATCAGTGTTCACAGACTCTAA
right AGATCCTTTCCCTCCTTTTGTGTTGCCATAACCTTTACATCAGTGTTCACG-----
      2***222222*222*222***2*222**222*2**222*2***2*N 1NN1NN
```

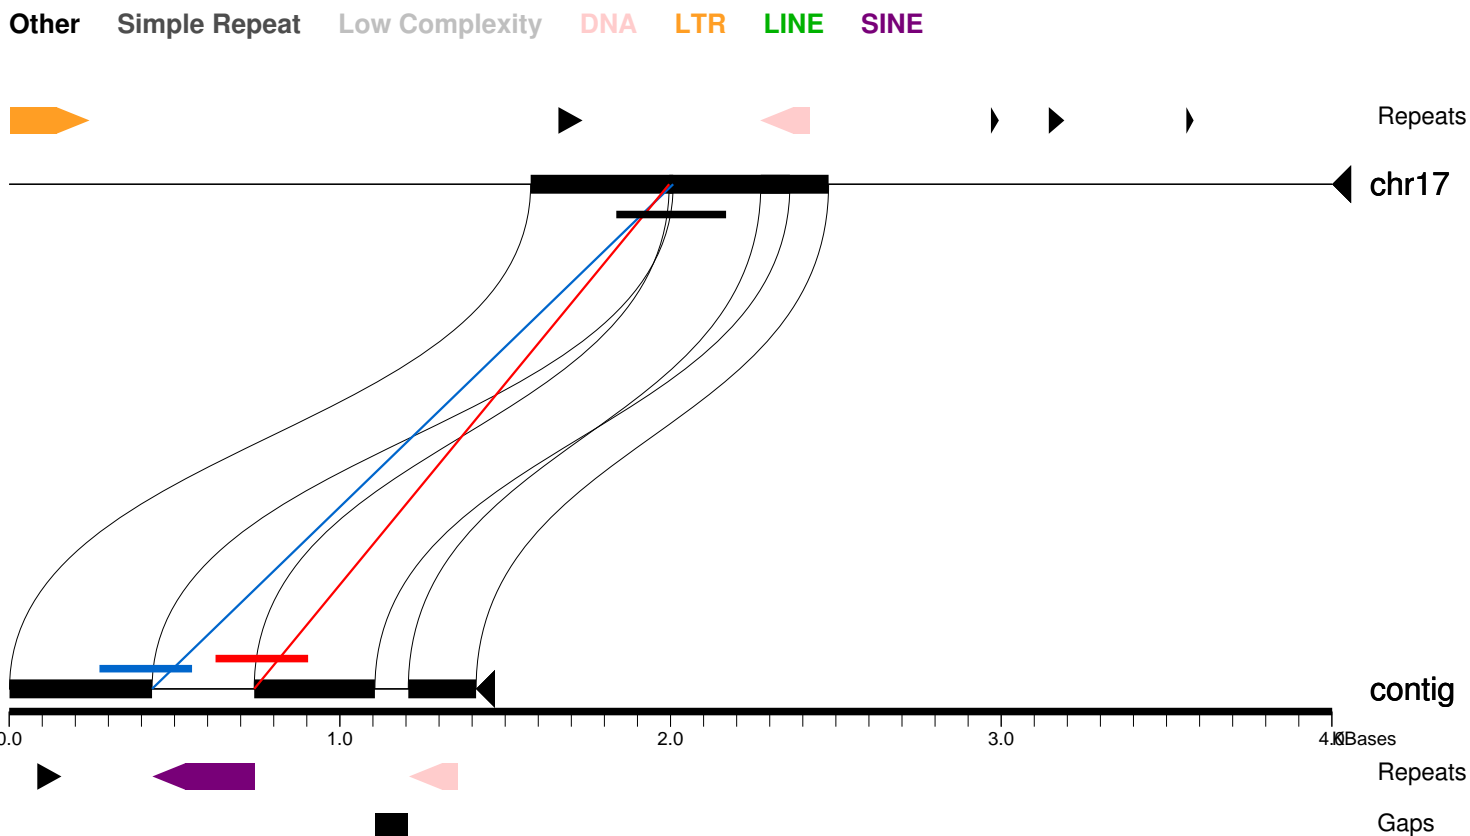

siteID: chr17\_13436850 Scafftig4 + Breakpoint: chr17:13436832

chr17:13436788-13436891

Overlap Length: 16 INS size: 279 Genotyped: Yes

```
left  TAA----GAAAAATAATAAT--GAAAATATA-----CAAAGAATAC---TTATAAACTGAAGTTATTA
chrom TAA----GAAAAATAATAAT--GAAAATATA-----CAAAGAATAC---TTATAAACTGAAGTTACTA
right CGATCTCTTGACCTCGTGATCCGCCCGCCTCGGCCTCCCAAAGTGCTGGGATTACAGGC-GAAGTTATTA
      11*11111111*11*11*1**11*1111111*11111111*****11111111***1*11*1*****N**
```

```
left  ATTTTFTTTTTTTTTTTTTTTTTTTTGGAGACGGAGTCTCGCTCTGTCGCCAGGCTGGAGTGCAGTG---G
chrom ATTTTFTA-----AGGCA-ACTCTGTATCTGTCATTTGAGATTGGTTCCATTCATTG
right ATTTTFTA-----AGGCA-ACTCTGTATCTGTCATTTGAGATTGGTTCCATTCATTG
      *****22222222222222222222**2*22*2***222*****222222*2*2*22*2**2*2222*
```

Other Simple Repeat Low Complexity DNA LTR LINE SINE

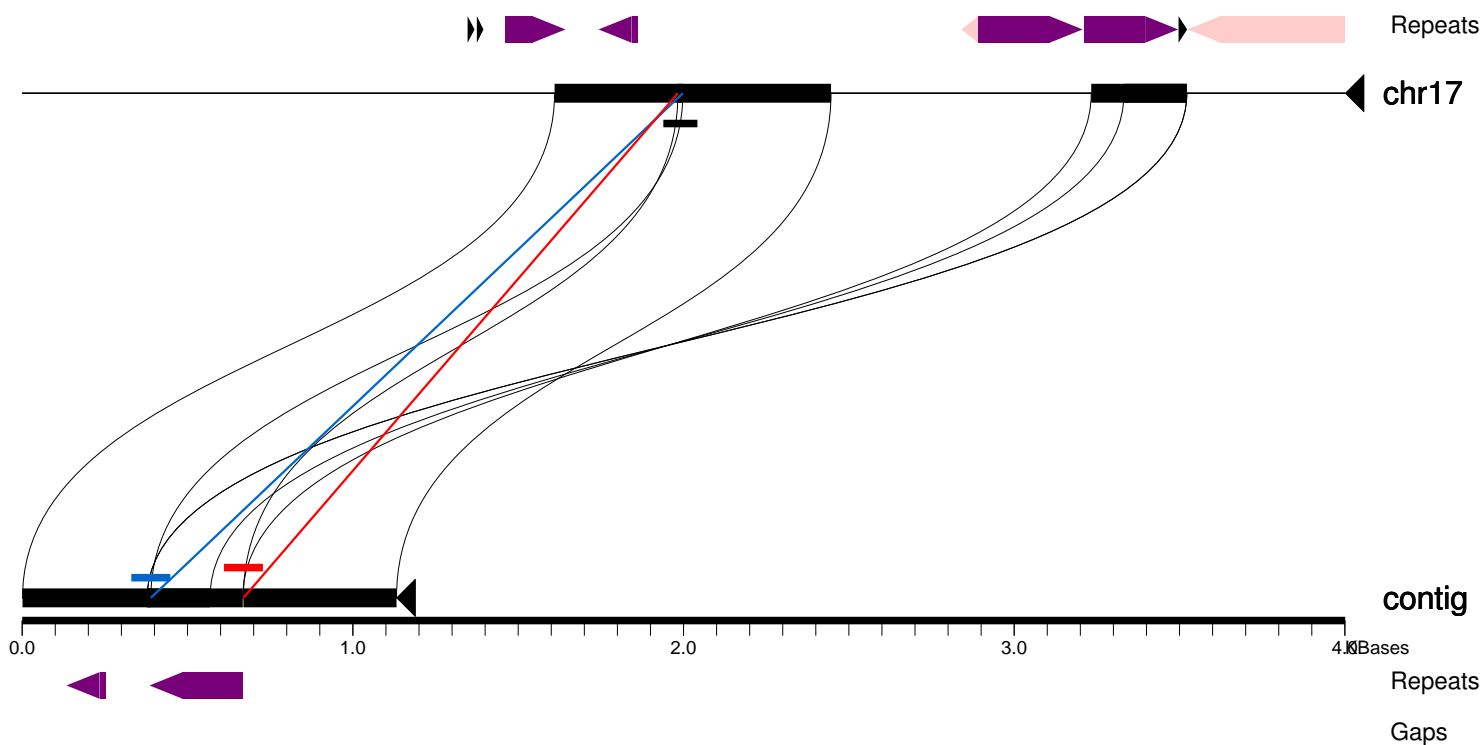

siteID: chr17\_13799652 Scaffig14 + Breakpoint: chr17:13799643

chr17:13799483-13799816

Overlap Length: 14 INS size: 299 Genotyped: Yes

left -----AACAGAAACTGAGTGACTTGGTGAAAAGGGGTGGGACAGAAATTCATTAACACCATC  
chrom TGTCTGCCACTGAAAAACAGAAACTGAGTGACTTGGTGAAAAGGGGTGGGACAGAAATTCATTAACACCATC  
right AG---GAGAATGGCGT--GAACCCGGGAGGC--GGAGCTTGCAGTGAGCC--GAGATCCC GCCACTGCA-C  
N2 2NN2N22NN1111\*\*\*1\*1\*1\*1\*11\*\*1\*111\*11\*\*\*1\*1\*1\*\*\*1\*1111\*\*11\*\*1\*

left TATTAAGTAGTCAAAAAATTAATTAAGTACTTAGATATTCCTTACCTGTATTAAAGACACAGAAAAAGAA  
chrom TATTAAGTAGTCAAAAAATTAATTAAGTACTTAGATATTCCTTACCTGTATTAAAGACACAGAAAAAGAA  
right TCCAGCCTGGGCGACAGAC-----GAGACTCC-----GTCTCAAAAAAAAAAAAAAAAAAAAA  
\*11111\*\*1\*1\*1\*1\*111111111111111\*\*1\*1\*\*\*111111\*\*1\*1\*\*\*1\*1\*1\*\*\*1\*\*

left GGTTCGTAGGAACATACTCAAAACAATAGTAAAGGC-----CGGGCGCGGTGGC-----TCACGCCT  
chrom GGTTCGTAGGAACATACTCAAAACAATAGTAAAGCATATATGACATACGTATTTGAGTTATCCAGGCA  
right -----AAAAAAAGTAAGAACATATATGACATACGTATTTGAGTTATCCAGGCA  
1111111111111111111111111\*\*1\*1\*\*\*111111\*\*1\*1\*\*\*1\*1\*1\*\*\*1\*\*

left GTAATCCCAGC--ACTTTGG-GAGGCCGAGGCCGGCGGATCAG-AGTTCAGGAGATC---GA-----  
chrom AGAGCCACAGCTGACGGTGGAGAAAGCTAAGTTAGA--AATCAAGGACTTCAGAATATCTTTGAATACTCT  
right AGAGCCACAGCTGACAGTGGAGAAAGCTAAGTTAGA--AATCAAGGACTTCAGAATATCTTTGAATACTCT  
22\*22\*2\*\*\*22\*N2\*\*\*2\*\*2\*\*22\*222\*\*222\*2\*\*\*2\*2\*22\*\*\*2\*2\*\*\*222\*\*222222

left GACCATCCCGGC-TAAAACGGTGAACCC---CGTCTCT- ACTAAA-----  
chrom GAAGTTACAGCCCTAAAAATGAAGCAGCAAGATGCATCTGTTAATAGAATTCCTGTGTC  
right GAAGTTACAGCCCTAAAAATGAAGCAACAAGATGCATCTGTTAATAGAATTC-----  
\*\*222\*2\*2\*2\*2\*\*\*2\*22\*2\*N\*22222\*2\*\*\*2\*2\*2\*\*2\*2222

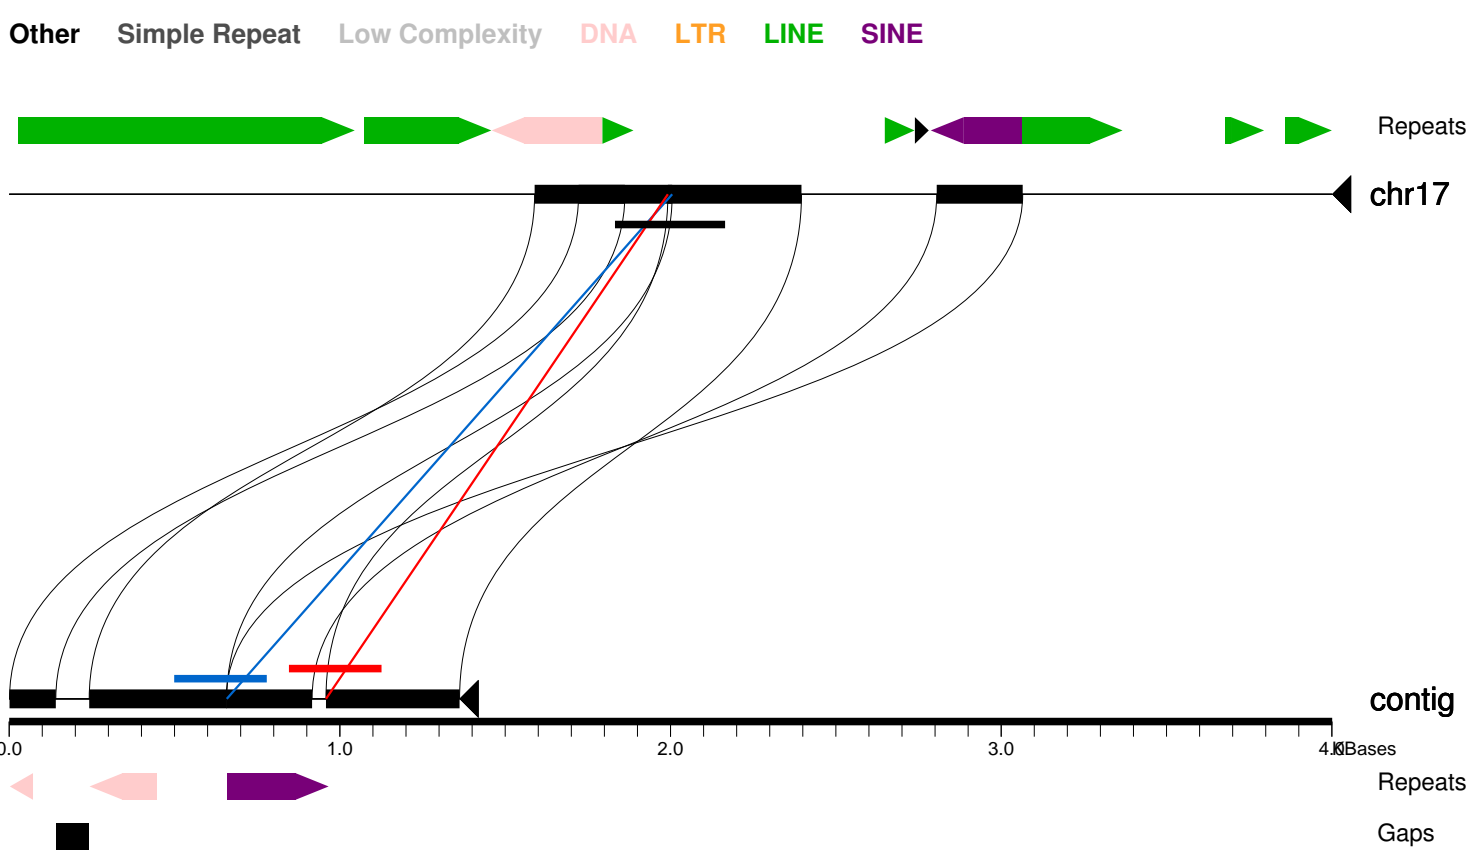

siteID: chr17\_13884342 Scafftig2 + Breakpoint: chr17:13884330

chr17:13884295-13884389

Overlap Length: 15 INS size: 310 Genotyped: Yes

```
left  CA-----TTAGAATAATAAAG-GCTCTGAGAA-----GACTTACAA-----TAAAGAAACCT
chrom CA-----TTAGAATAATAAAG-GCTCTGAGAA-----GACTTACAA-----TAAAGAAACCT
right CCGCCCGTCTCGGCCTCCCAAAGTGCTGGGATTACAGGCGTGAGCCACCGCGCCCGGCC-TAAAGAAACCT
      *11111111*11*11*111****1***11*11*11111111**111**111111111111*****
```

```
left  TTTTFFFFFFFFFFFFFFFFFFFFFFFFFFFFFFFFTTTGGAGACGGAGTCTCGCTCTGTCGCCAGTCTGGAGTG
chrom TTTTAAATGTTGTTTAAATCCAGTGTGT-----TCAAACCTTAT-----TTGACTG
right TTTTAAATGTTGTTTAAATCCAGTGTGT-----TCAAACCTTAT-----TTGACTG
      ***22*2**2***22*2222*2*2*2222222222222222**222**2*2*222222222*2**2**
```

```
left  CAG--
chrom CAGGA
right CAGGA
      ***22
```

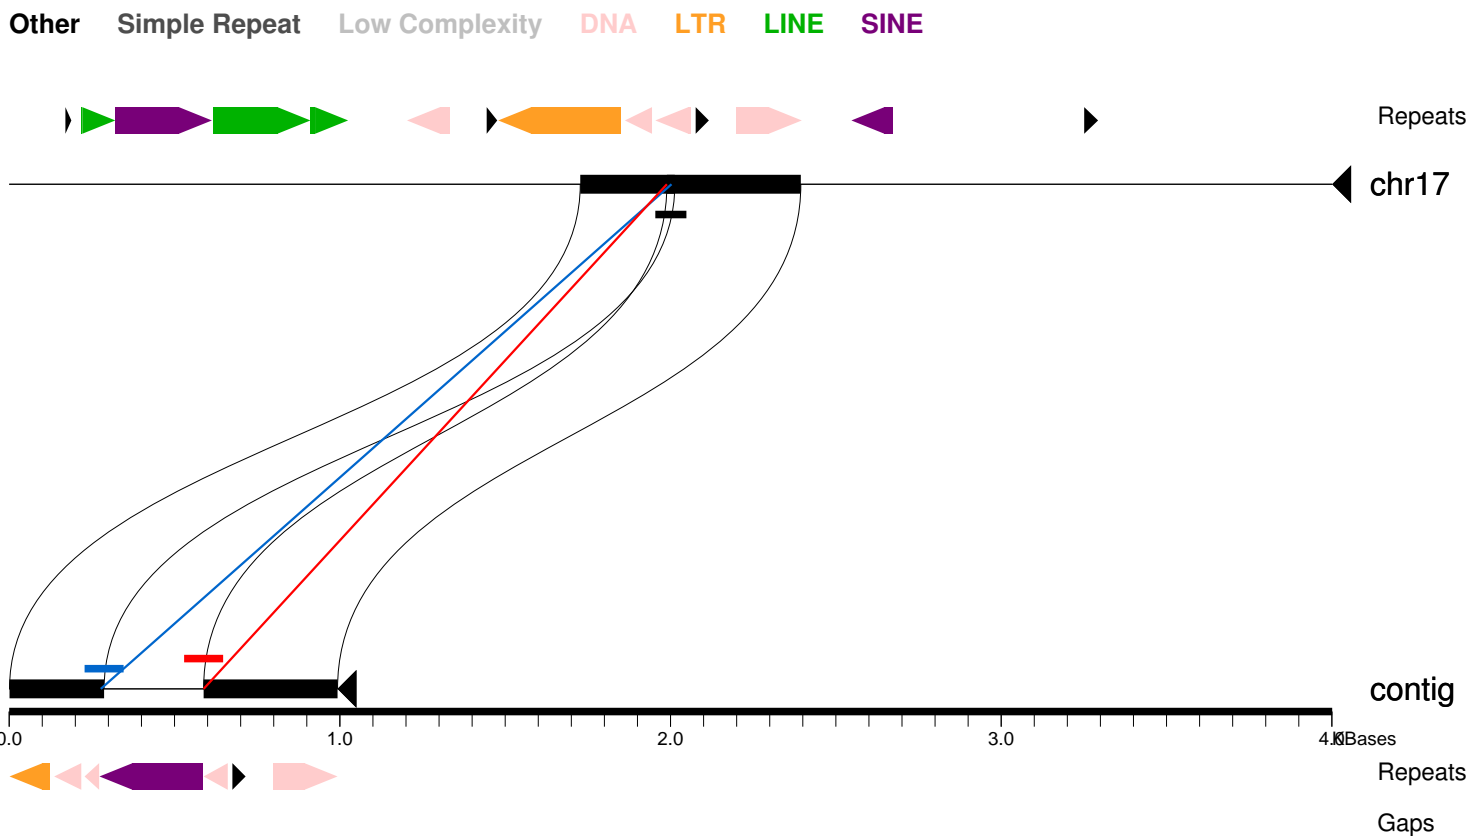



siteID: chr17\_21668228 Scaffitg3 + Breakpoint: chr17:21668213

chr17:21668053-21668384

Overlap Length: 12 INS size: 155 Genotyped: Yes

left -----TTCTCAAAAAGTATATATAAAAAAAGAAACATGTAGCAACATCACTAAAAGTGACTAT  
chrom AAGTGTACAGATTTTACTCAAAAAGTATAAA-AAAAAAGAAACATGTAGTAACATCACCAAAGTGACTAT  
right A---GAATGGCGTGAAACCCGGGAGGC-----GGAGCTTGCAGTGAG-----CCGAGATCCCGC  
2 2N2NN2NN2112\*1\*111\*\*1111N121111111\*1\*1\*1\*\*1\*\*21\*111111211\*\*111\*111

left AAATAAAAAGAGTTTGAAATTTGGGACACTTTTTAAGATGTTACAGAGAGGAGTAGAATTAGAAAATAAAGT  
chrom AAATAGAAGAGTTTGAAACTTGGGACACTTTTTAAGATGTTACAGAGAGGAGTAGAATTAGAAAATAAAGT  
right CACTGCAC-----TCCAGCCTGGGCGAC-----AGAGCGAGACTCCGTCTCAAAAAAAAAAAAA  
1\*1\*1N\*111111\*11\*121\*\*\*\*11\*\*1111111111111\*1\*1\*\*111111\*11\*1\*1\*\*1\*\*11

left AGAAGGAAAAATCTGAAGGTAGAAACATGAAGAT---TGTAGTCC-----CAGCTACTTGGGAGGC  
chrom AGAAGGAAAAATCTGAAGGTAGAACATGAAGATAATTTGGAGACCAGGACAAGAGCAGTTTCTCTGGGGTA  
right AAAAAAAAAAAAAAAAAAAAAA- AACATGAAGATAATTTGGAGACCAGGACAAGAGCAGTTTCTCTGGGGTA  
\*1\*\*11\*\*\*\*1111\*\*111\*1\*\*\*\*\*222\*\*2\*\*2\*\*2222222222\*\*\*2\*2\*\*22\*\*2\*22

left TGAG--GCAGGAGAATGGCGTGAA-----CCCGGAGGCGGAGCT-----TGCAGTGAGCCGA  
chrom GTAGCAGCAAAAAAAAAATGGTGGGAGTGGATTCAATGAAGTCATATATGAAAAATTAGATGCAGATAAACTT  
right GTAGCAGCAAAAAAAAAATGGTGGGAGTGGATTCAAGTCATATATGAAAAATTAGATGCAAATAAACTT  
22\*\*22\*\*\*22\*2\*\*\*\*\*2\*2\*\*2222222\*2N2\*2\*\*2\*22\*22\*2222222222\*\*\*122\*22\*22

left GATCCC--GCC-----ACTGCACTCCAGCCTGGGCGACAGAGCGAGACTCCGT  
chrom TATGTTTTGCATAAAATATTGCTGTAAATGAAAAAAGAGAAAAAGGGTTGTGAGC  
right TATGTTTTGCATAAAATATTGCTGTAAATGAAAAAAGAGAA-----  
2\*22222\*222222\*2\*\*22\*22\*2222222\*2\*21NN1NNNN1NN1N

Other Simple Repeat Low Complexity DNA LTR LINE SINE

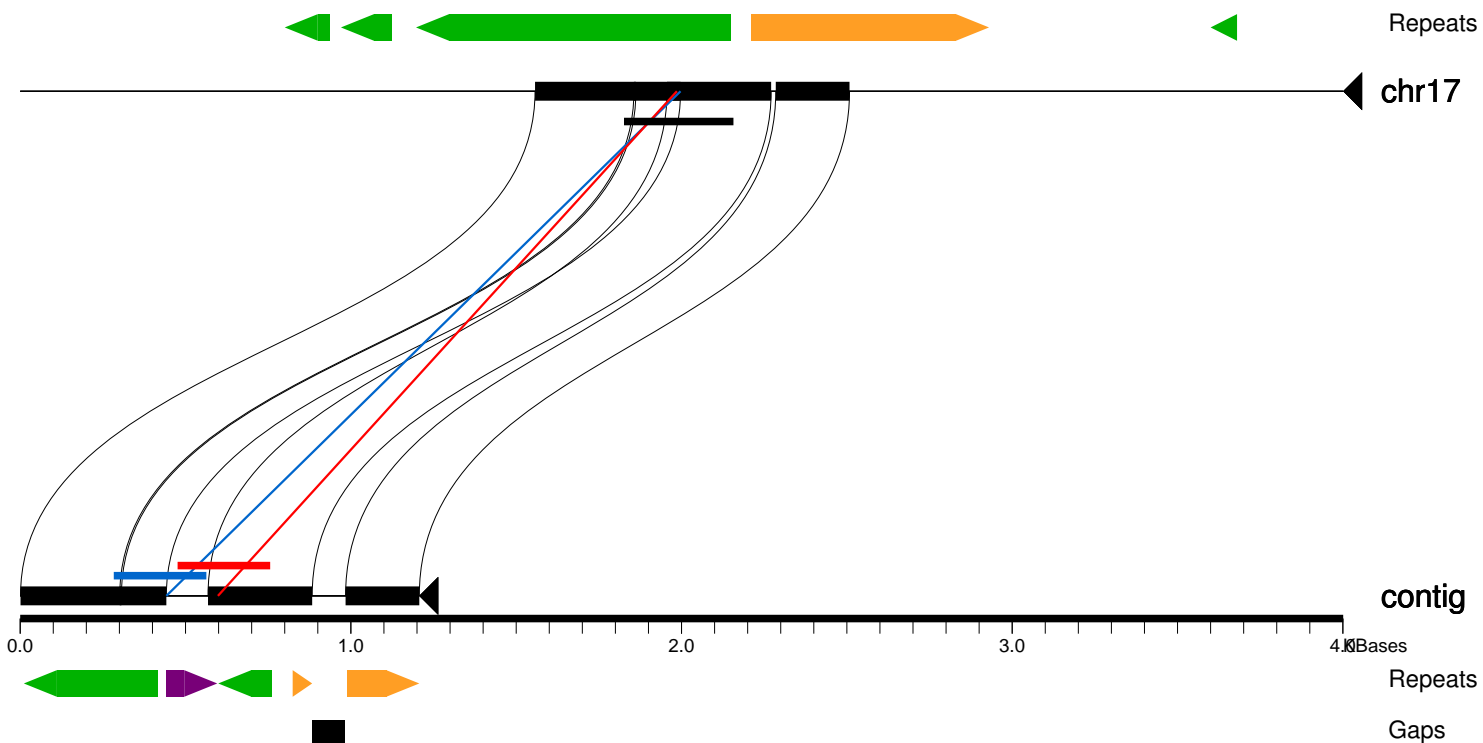

siteID: chr17\_35922005 Scaffoldig1 - Breakpoint: chr17:35922016

chr17:35921969-35922075

Overlap Length: 13 INS size: 304 Genotyped: Yes

```
left   ---TCTTTAAGCCGTAATA----ACA-ACTGGAATGGCGTTGGAAGTAGATTATT----AAAGAATGATG
chrom  ---TCTTTAAGCCGTAATA----ACA-ACTGGAATGGCGTTGGAAGTAGATTATT----AAAGAATGATG
right  CAGTCCGCAGTCCGGCCTGGGCGACAGAGCGAGACTCCGTCTCAAAAAAAAAAAAAAAAAAAAAAAAAAAGAATGATG
      111**111*11***111*11111***1*11*11*111***111**11*1*11*111111*******
```

```
left   ACGGCCGGGCGCGGTGGCTCACGCCTGTAATCCCAGCACTTTGGGAGGCCGAGGCGGGTGG
chrom  AATTCTGCAATTTTAACTTAAG---GTC--CATAAAACT-----GCAAAAAGTGAAGTGG
right  AATTCTGCAATTTTAACTTAAG---GTC--CATAAAACT-----GCAAAAAGTGAAGTGG
      **22**2*222222*22**2*2*222**222*22*22***2222222**22*2*2*2222*
```

Other Simple Repeat Low Complexity DNA LTR LINE SINE

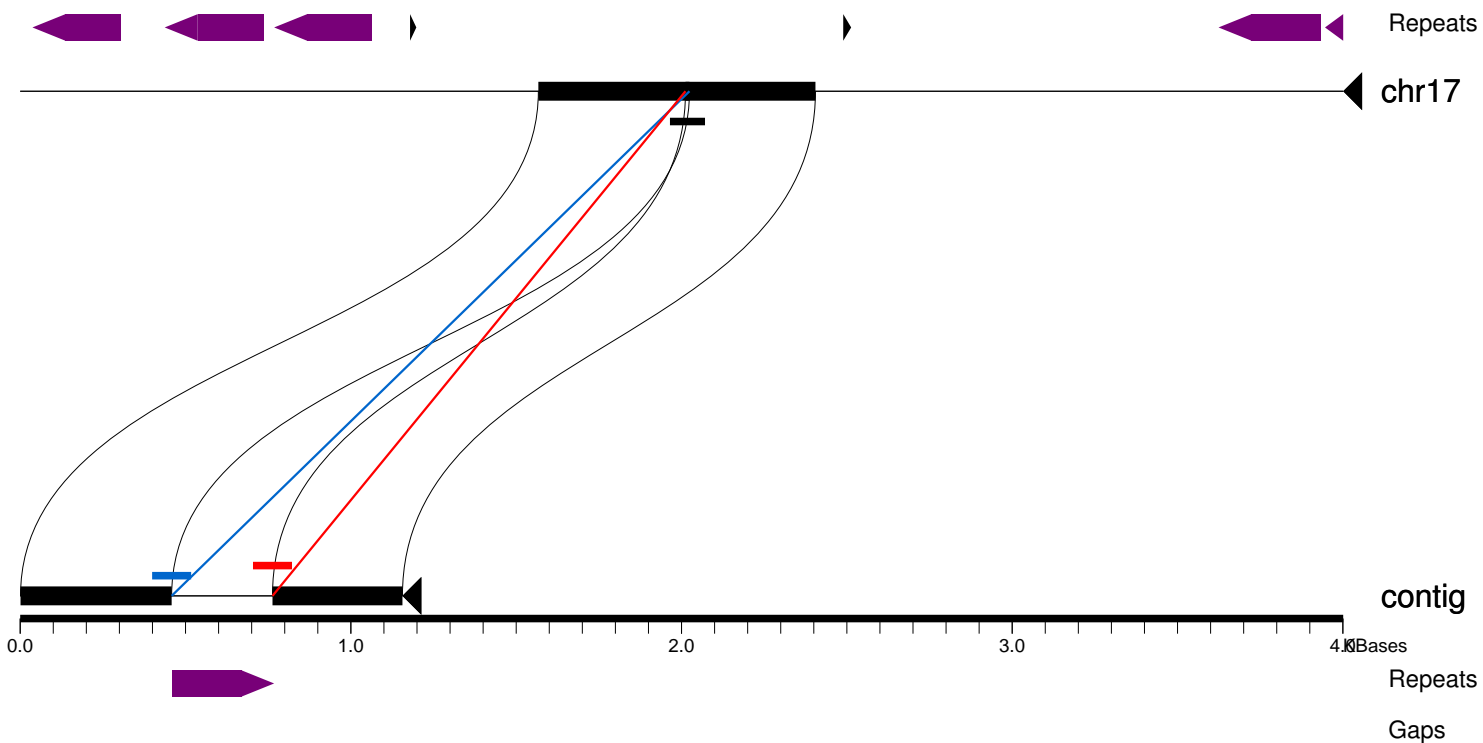



siteID: chr17\_36025919 Scafftig3 - Breakpoint: chr17:36025927

chr17:36025882-36025986

Overlap Length: 15 INS size: 266 Genotyped: Yes

```
left  --GGATTATAGGTATGAGCTACCACGCCTGG--CCAT-----AGAATGCATTTTAAAAGAGATA
chrom --GGATTATAGGTATGAGCTACCACGCCTGG--CCGT-----AGAATGCATTTTAAAAGAGATA
right CTGCACTCCAGCC-TGGGCGACAGAGCGAGACTCCGTCTCAAAAAAAAAAAAAAAAAAAAAAAAATAAAAGAGATA
      11*1*1*11**111**1**1**111**11*111**2*111111111111*1**111*1111*****
```

```
left  CTTCACTTTGGGAGGCCGAGGCGGGCGGATCACGAGGTCAGGAGATCGAGGCCATCCCGGCTAA
chrom CTTCA-----GAACAAACAATGCTTTTACCCATTTAA----AT-GAGTTTTTAAACAG-TGG
right CTTCA-----GAACAAACAATGCTTTTACCCATTTAA----AT-GAGTTTTTAAACAG-TGG
      ****22222222*22*2*22222**222*22*2*22*2*2222**2***2222*22*2*2*22
```

Other Simple Repeat Low Complexity DNA LTR LINE SINE

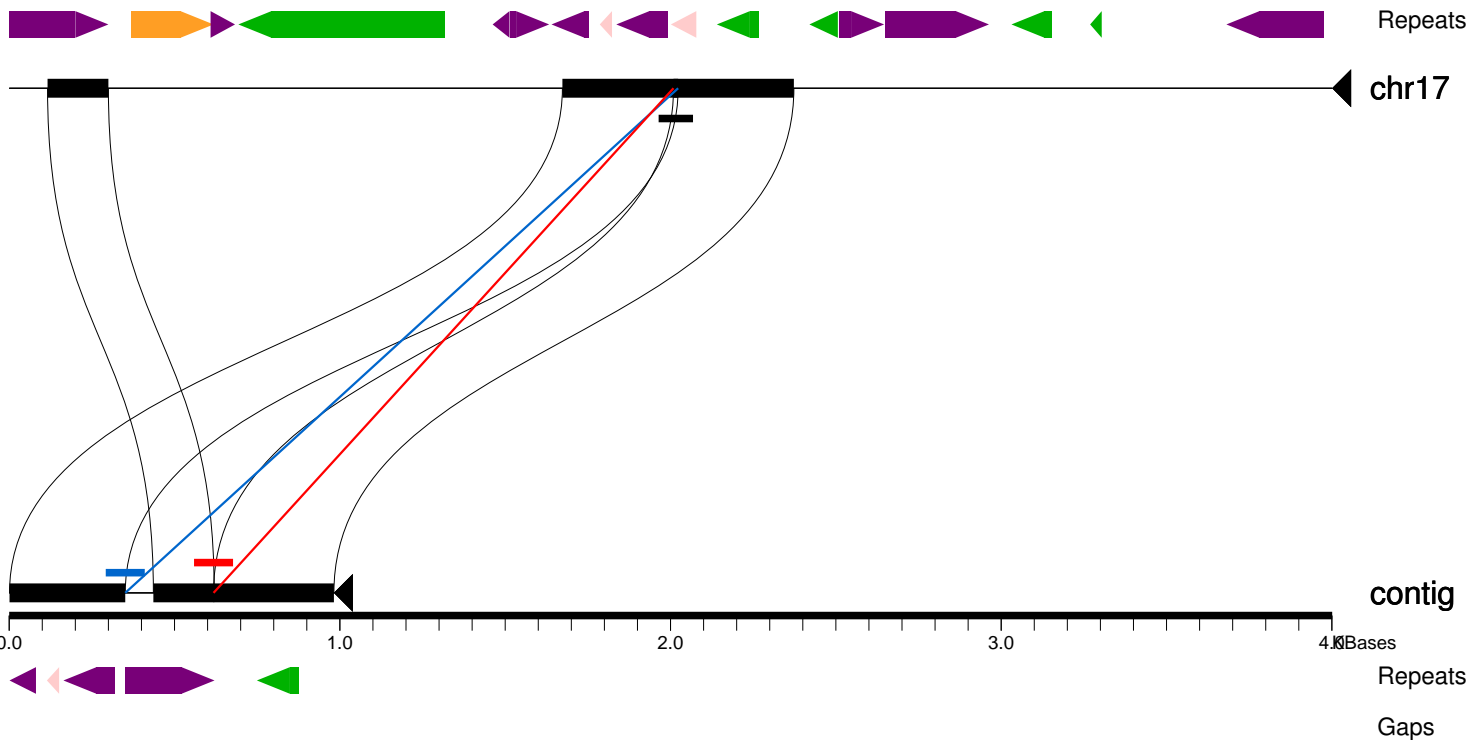





siteID: chr17\_46617242 Scaffig2 + Breakpoint: chr17:46617220

chr17:46617161-46617280

Overlap Length: 0 INS size: 166 Genotyped: Yes

```
left  TTCATTGCCTCTTTGT--GCTG---CCGTGGTATCATCAGAGACGGTGAGTTTCATAAAATTTGGACGGAT
chrom  TTCATTGCCTCTTTGT--GCTG---CCGTGGTATCATCAGAGACGGTGAGTTTCATAAAATTTGGAAGAA
right  TCCCA-GCTACTTGGGAGGCTGAGACAGGAGAATCACTTGAACCCAGAAGGTGGAGG---TTG--AAGAA
      *1*111**11***1*111****111*1*11*1****111**11*1111**1*11*11111***1122**2
```

```
left  CACTTGAGGTCAGGAGTTTCGAGGCCAGCCTGGCCAACATGGTGAAACCTCATCT----
chrom  GACAGCCAGCAACGCTTTTGTGTTT--CCTGTA-AAAAGAGTTTCAACTCCTCTCCAA
right  GACAGCCAGCAACGCTTTTGTGTTT--CCTGTA-AAAAGAGTTTCAACTCCTCTCCAA
      2**22222*22*2*22**2*2*22222****222**2*22**222*2***2***2222
```

Other Simple Repeat Low Complexity DNA LTR LINE SINE

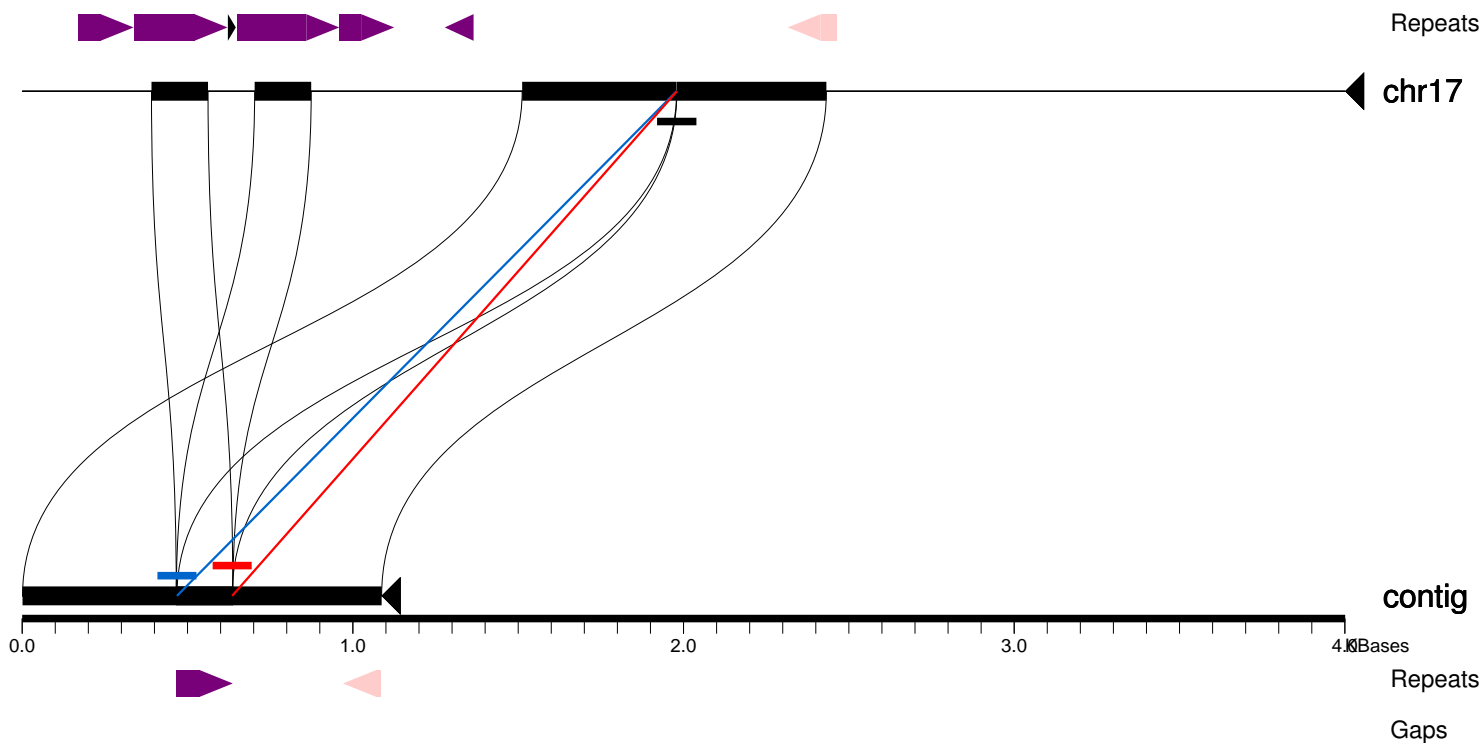

siteID: chr17\_49529393 Scfftig2 - Breakpoint: chr17:49529391

chr17:49529341-49529431

Overlap Length: 10 INS size: 292 Genotyped: Yes

```
left TT----AT-----ACAAAAATTAAGA-TGGATTAAAGA-----TTT-----AAAGATAAGAC
chrom TT----AT-----ACAAAAATTAAGA-TGGATTAAAGA-----TTT-----AAAGATAAGAC
right GCGGAGATCGCGCCACGGCACTCCCGCCTGGGCGACAGAGCGGAGACTCCGTCTCAAAAAAAAAAAAAAAAAA
111111**111111**111*1*111*11***111*1***11111111111*1*111111***1*1**1*1
```

```
left TTAAAACTATAAAAAACC CGCCGGGCGCGGTGGCTCACGCCTGTAATCCCAGCACTTTGGGAGGCCGAGGC
chrom TTAAAACTATAAAAAACC-----TAGAAG---AAAACCTAGGCAGTACCATTC
right AAAAAAAAAATAAAAAACC-----TAGAAG---AAAACCTAGGCAGTACCATTC
11****11*****222222222222222222222222222222*22**2222*22**2*2**2**22*2*22*
```

```
left GGGCGGA
chrom AGG---A
right AGG---A
2**222*
```

Other Simple Repeat Low Complexity DNA LTR LINE SINE

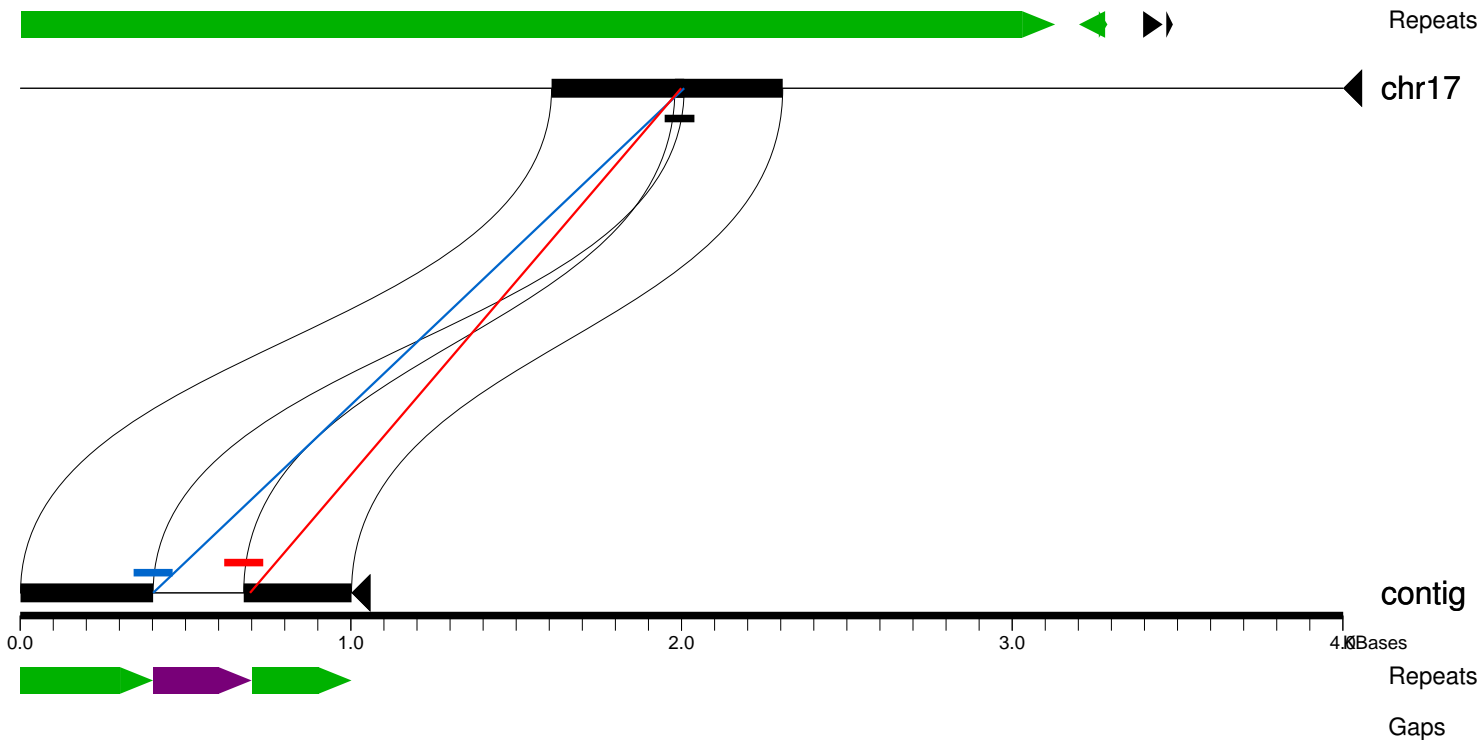

siteID: chr17\_50049746 Scaffitg1 - Breakpoint: chr17:50049731

chr17:50049682-50049786

Overlap Length: 11 INS size: 303 Genotyped: Yes

```
left  GTC----CTCAATCTTT-----ATTTTATAGATTCCATATCTAAAGTTAATACTCAAGA----TTATCGA
chrom GTC----CTCAATCTTT-----ATTTTATAGATTCCATATCTAAAGTTAATACTCAAGA----TTATCGA
right CACTGCACTCCAGCCTGGGCGACAGAGCGAGACTCCGTCTCAAAAAAAAAAAAAAAAAAAAAAAAAAATTTATCGA
      11*1111***1*1*1*1111111*11111***1***1*1**1***111**1*111**1*1111*****
```

  

```
left  TGGTGGCCGGGCGCGGTGGCTCACGCCTGTAATCCCAGCACTTTGGGAGGCCGAGGCGGGCGG
chrom TGGTATTCTAA-----ACTAAGTTTGTGTA--CAATGCACTTTT-----CTGAACATCTAAG
right TGGTATTCTAA-----ACTAAGTTTGTGTA--CAATGCACTTTT-----CTGAACATCTAAG
      ***222*22222222222**2*2222****22*222*****222222*2**2222222*
```

Other Simple Repeat Low Complexity DNA LTR LINE SINE

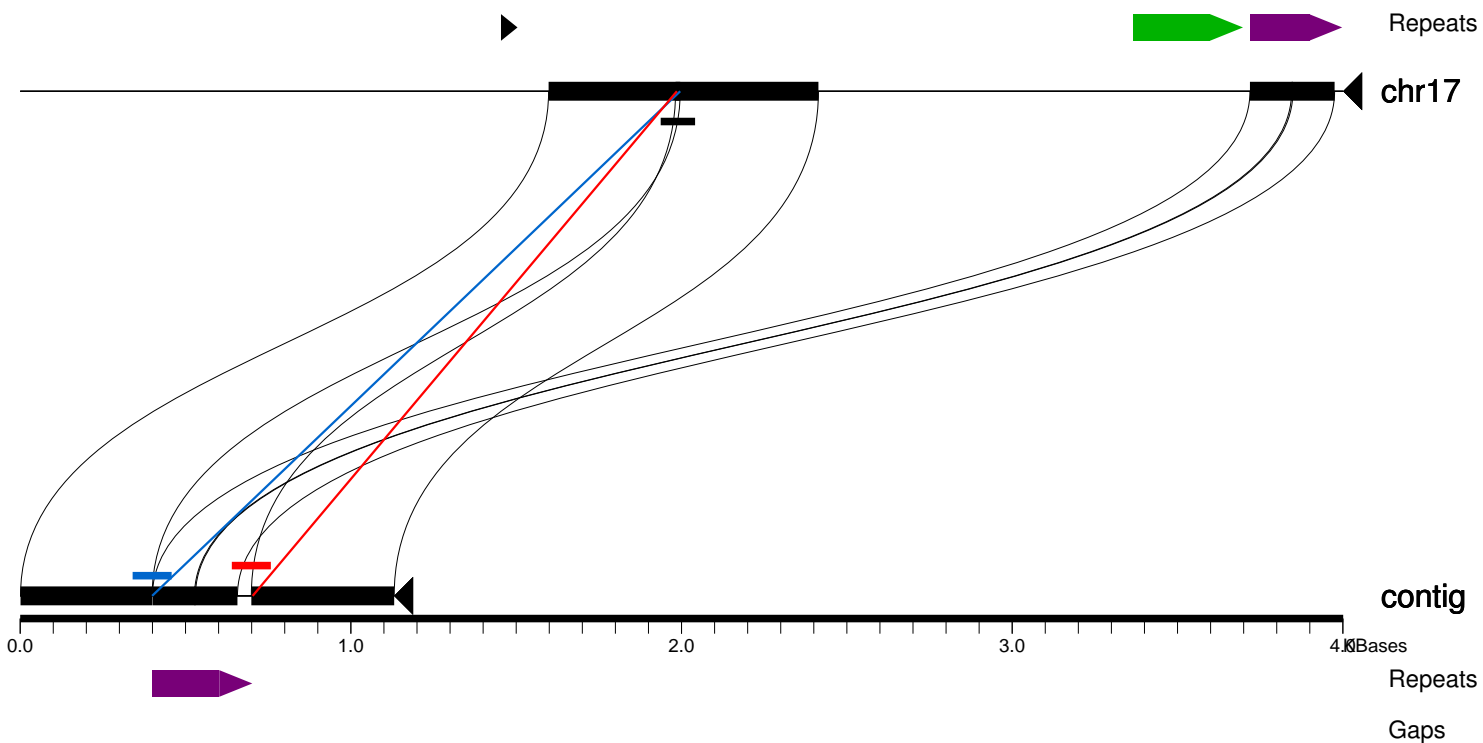



siteID: chr17\_51427902 Scafftig3 - Breakpoint: chr17:51427857

chr17:51427811-51427916

Overlap Length: 14 INS size: 67 Genotyped: Yes

```
left  TGT--TGT-AGGTAT-----AGAGAGGTTGGGGGTGAATGTACCAACTGGGGATAAAA-CTGAGAA
chrom TGT--TGT-AGGTAT-----AGAGAGGTTGGGGGTGAATGTACCAACTGGGGATAAAA-CTGAAAA
right TCTGCAGTCAGGCCTGGGCGACAGAGCGAGACTCCGTCTCAAAAAAAAAAAAAAAAAAAAAAAACTGAAAA
      *1*111**1***11*1111111111**1***11*11*11*1**111*11**111111*1****1****2**
```

```
left  GTTCC-ACTGCAGTCTGCAGTCAGGCCTGGGCGACAGAGCGAGACTCCGTCTCAAAAAAAAAAAA
chrom GTTAAAGACAGGATTGTCCAC-CATGTTTGTGA---ATATCATGTTAGCCTCTG-----
right GTTAAAGACAGGATTGTCCAC-CATGTTTGTGA---ATATCATGTTAGCCTCTG-----
      ***222**2*2*2*2*2**22**2*22**2*2222*2*2*22*2222*2***2222222222
```

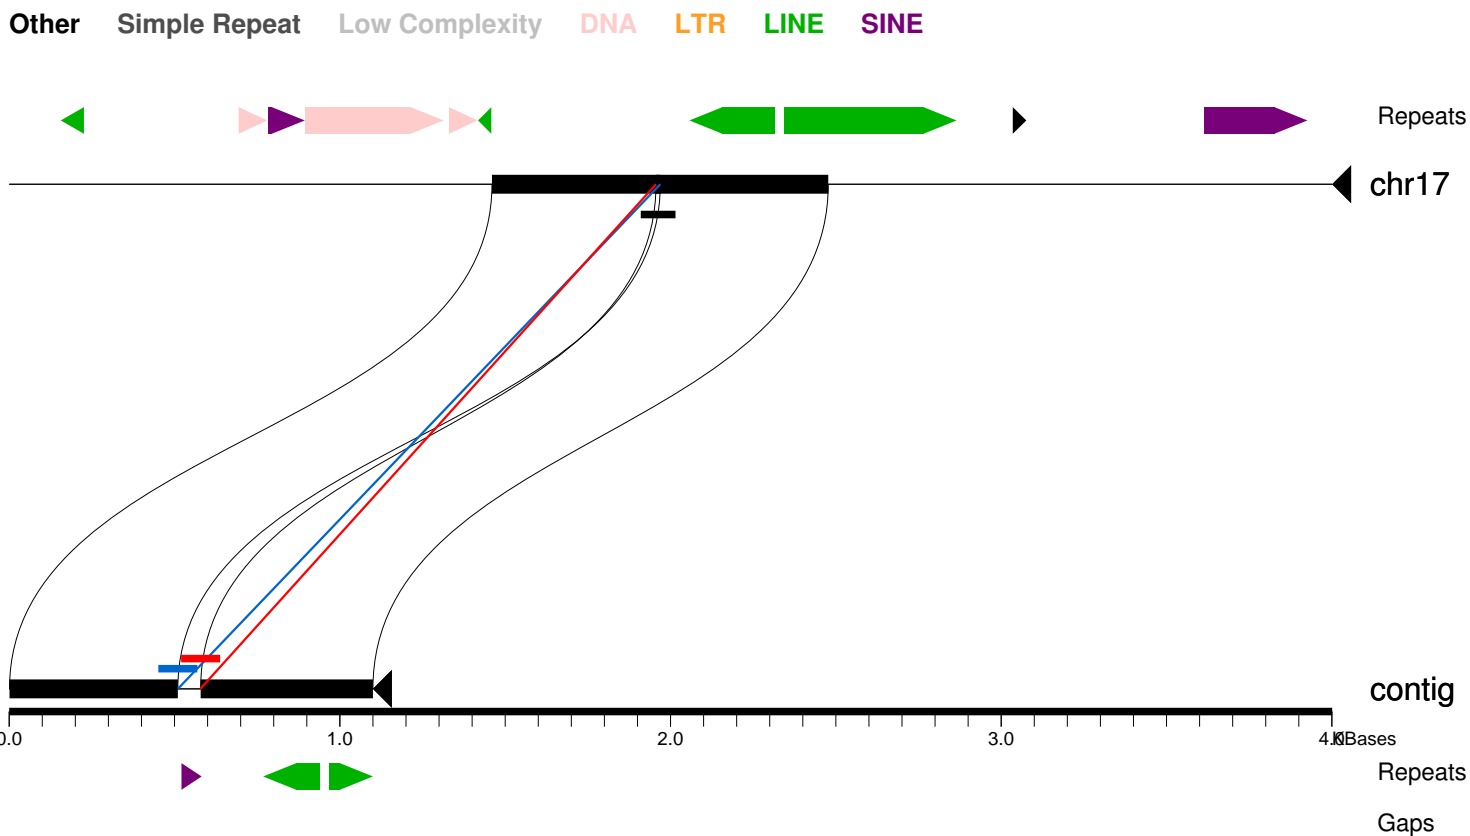



siteID: chr17\_51457985 Scafftig1 - Breakpoint: chr17:51457993

chr17:51457948-51458052

Overlap Length: 15 INS size: 307 Genotyped: Yes

```
left   ATCTTT-----ACATAACTCTA-TATTTTCAAAAAATGTGTTTATTTATAAAAATTATTT
chrom  ATCTTT-----ACATAACTCTA-TATTTTCAAAAAATGTGTTTATTTATAAAAATTATTT
right  TCCGCAGTCCGGCCTGGGCGACAGAGCGAGACTCCGTCTCAAAAAAAAAAAAAAAAAAAAAAA-AAAATTATTT
      11*111111111111111111111111***1*1*111*1*111*1*****1111111*1111*1*****

left   TTTCTGGCCGGGCGCGGTGGCTCACGCCTGTAATCCCAGCACTTTGGGAGGCCGAGGCGGGTGG
chrom  TTTCTTTATTTT-----TGTCT---GGCTGGATT-----ACTTCAAAAAGACCAGTCTTTAAGC
right  TTTCTTTATTTT-----TGTCT---GGCTGGATT-----ACTTCAAAAAGACCAGTCTTTAAGC
      ****2222222222222222**2**222*2***2*2*222222***2222*2**2222222222*2
```

Other   Simple Repeat   Low Complexity   DNA   LTR   LINE   SINE

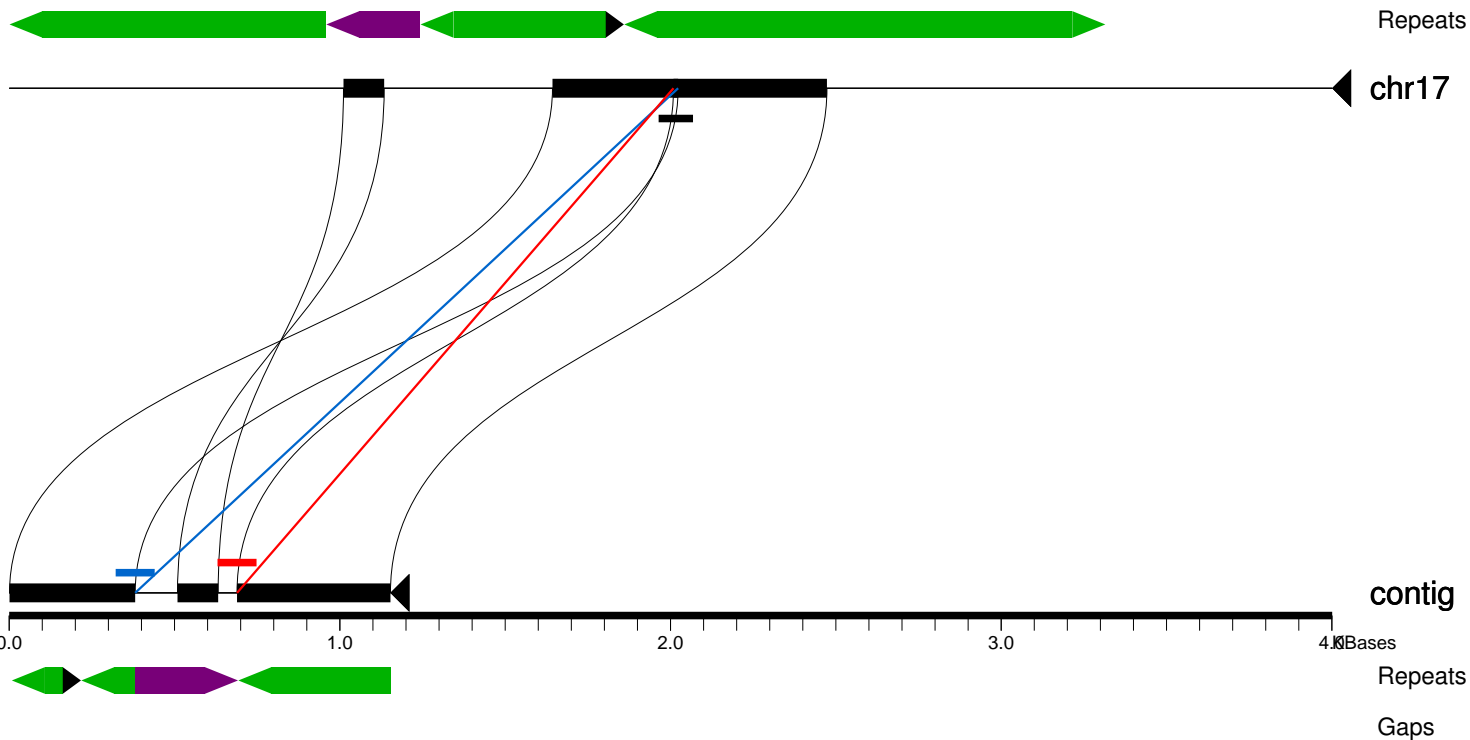

siteID: chr17\_52456347 Scaffitg1 - Breakpoint: chr17:52456342

chr17:52456182-52456518

Overlap Length: 17 INS size: 159 Genotyped: Yes

```

left  -----TTTTATTAGATACGTTATAATATTTTATAAAATGAATATTTGCCAATTATAGGAA
chrom GTGGCATGAGAATAATTTTATTAGATACGTTATAATATTTTATAAAATGAATATTTGCCAATTATAGGAA
right TTG-----AGACGGAGTCT-----CGCTCTG-----TCGCCAGGCCGGACTGCGGACTGCAG----
N22      222NNN2N*1*111111111**1*1*111111*11111*1*111111***11*1*11**111

left  ACTTGCTACCTATATCCTCTTCAAGTAAAATTTTCATGTTCCCTGAAATGACCCTAATAACTTCTAGAAT
chrom ACTTGCTACCCATATCCTCTTCAAGTAAAATTTTCATGTTCCCTGAAATGACCCTAATAACTTCTAGAAT
right ---TGGCG--CAATCTCGGCTC--ACTGCAAGCTCCGCTTCCCGGT--TCACGCCATT--CTCCT--GCCT
111**1*111*N**1**11**111*1*11**11**111*****1*111*1**1*1*1*11**1**1*11*

left  AAGTTGTGATATACAAGAACACGTAGCTACTATTTCTTTTTTTTTTTTTTTTTTTTTTTTTTTTTTTTT
chrom AAGTTGTGATATACAAGAACAACGTCAGTCCTACTATTTCTAATGGTGATCACTCATCAGTTTCTTACCCACTG
right CAGCCT-----CCCGAGTACGTAGCTACTATTTCTAATGGTGATCACTCATCAGTTTCTTACCCACTG
1**11111111111*11**11*******22*22*22*22*22*22***2**22222*22

left  TT-----TTTTTTGAGACGGAGTCTCGCTCT----GTCGCCAGGCCGGACTGCGGACTG--
chrom ATAAAGGAACAGGAAATGTGATCATTTTCATGTCTCAGTCATAAAGGTGCTTATATTGTTTTAATTACTTG
right ATAAAGGAACAGGAAATGTGATCATTTTCATGTCTCAGTCATAAAGGTGCTTATATTGTTNNNNNNNNNNN
2*222222222222*2*22*2*22222***22**22222*22**22*2222*2NN1NNNN111NN

left  ----CAGTGG----CGCAATCTCGGCTC--ACTGCAAGC-----TCCG-----CTT
chrom TTAACATTTTTTATCAAGATTTCAATTTTTTAATAGAAAACAATTTTCTGGTTTACTT
right NNNNNNNNNNNNNNNNNNNNNNNNNNNNNNNNNNNNNNNNNNNNNNNNNNNNNNNNNNNNNNNNNNNNN
NNNN11N1NNNNNN1NNN11N11NNN1NNN1NNN11N1N      11N1      111

```

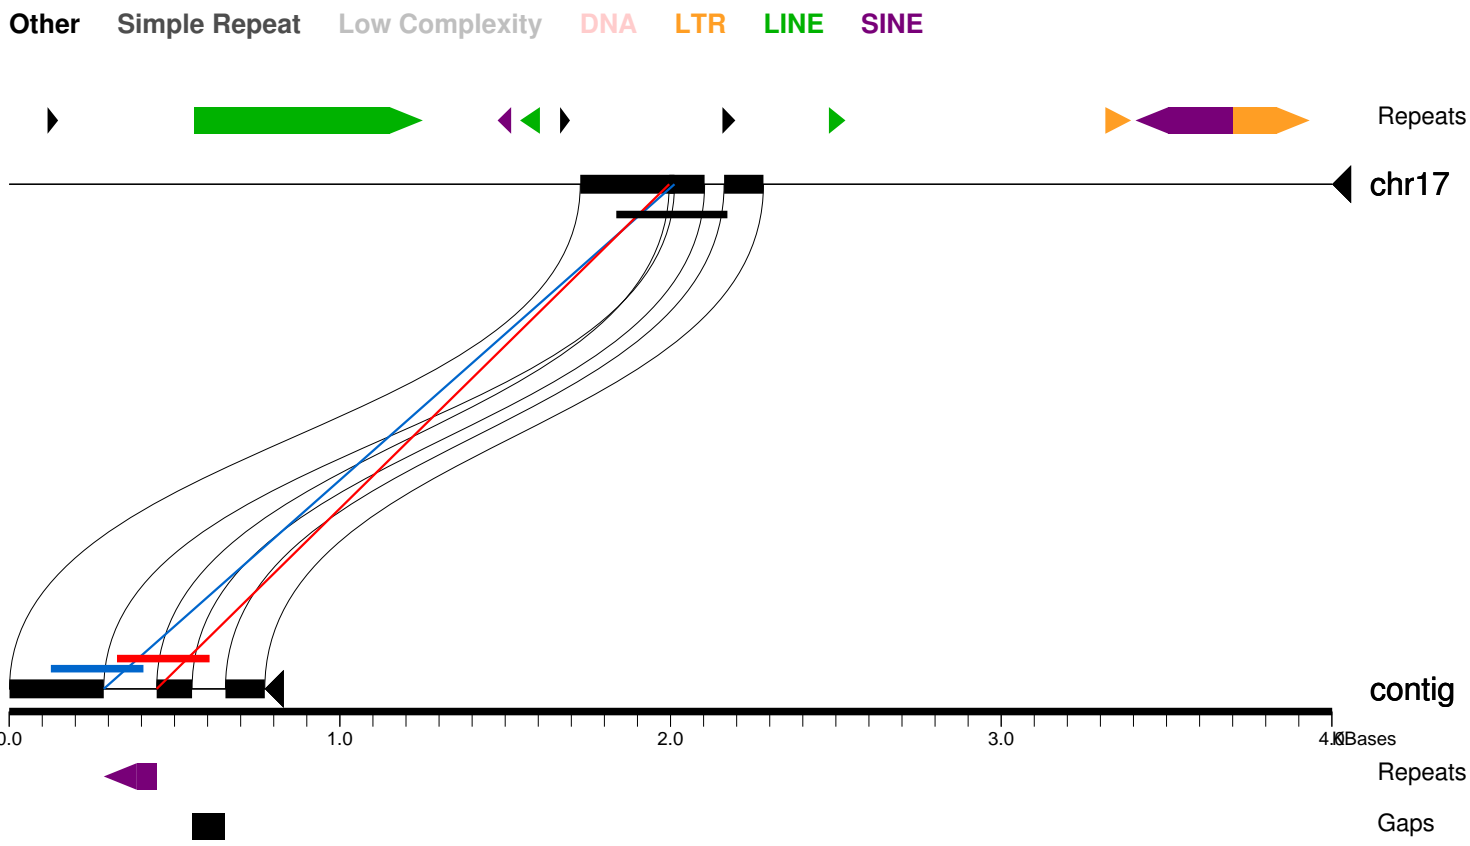

siteID: chr17\_53308230 Scafftig1 + Breakpoint: chr17:53308238

chr17:53308187-53308291

Overlap Length: 9 INS size: 321 Genotyped: Yes

```
left   T-----CTCATTTTACAGTGTAACCATTTAACATTTTCTCAGGCCTATAGAAATATCCCC
chrom  T-----CTCATTTTACAGTGTAACCATTTAACATTTTCTCAGGCCTATAGAAATATCCC
right  GGGCGACAGAGCGAGACTCCGTCT-CAAAAAAAAAAAAAAAAAAAAAAAAAAAAAAAAAA
      11111111111111111111***11*1*1**1111**11*111**1*1111111*11111*1*1***1*1****
```

```
left   TTTGTTGGCCGGGCGCGGTGGCTCACGCCTGTAATCCACGCACTTTGGGAGGCCGAGGCGGGCGG
chrom  TTTGTT-CATTCATCAAGCACTTAT-CATGTGTACC----ACTTGGTCAG--CTAGGT-----
right  TTTTTT-AAATTCATCAAGCACTTAT-CATGTGTACC----ACTTGGTCAG--CTAGGT-----
      ***1*221222222*22222**2*22*2***222**2222****2*22**22*2***22222222
```

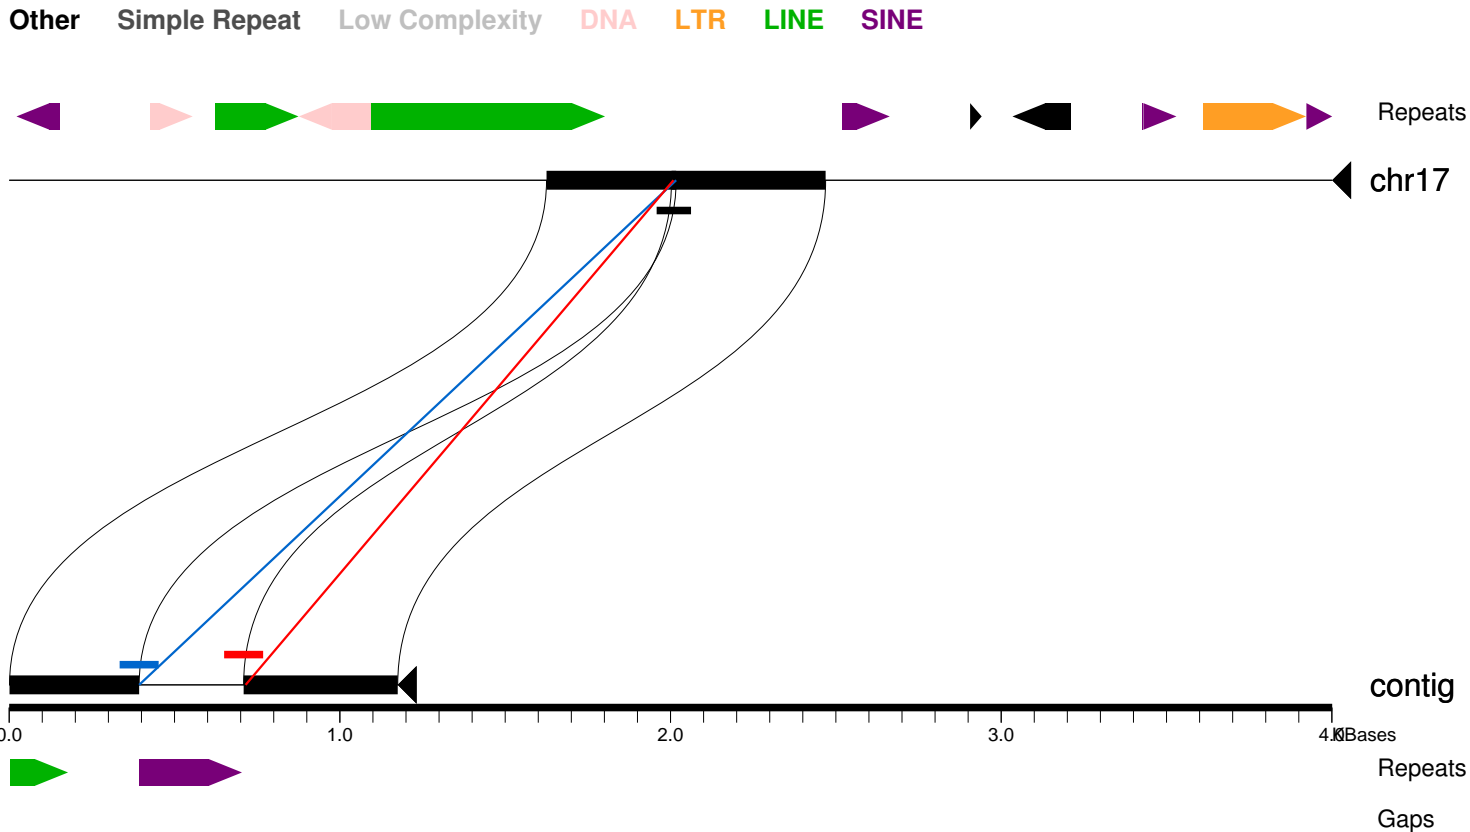

siteID: chr17\_54594352 Scafftig1 - Breakpoint: chr17:54594334

chr17:54594286-54594393

Overlap Length: 12 INS size: 414 Genotyped: No

```

left  AGATTTTTTGGCTGTTTAAGGGACAGTTTCCAAGCCCATTTGTCTTAAG-----TGTGGAAAAAT
chrom AGATTTTTTGGCTGTTTAAGGGACAGTTTCCAAGCCCATTTGTCTTAAG-----TGTGGAAAAAT
right NNNNNNNNNNNNNNNNNNNNNNNNNNNNNNNNNNNNNNNNNNNNNNNNNNNNNNNNNNNNNNNNNNN
11111111111111111111111111111111111111111111111111111111111111111111
*22222*222*22*22222**222*22***2*2222222***2222*22*222222222

left  GGGCCGGGCGCGGTGGCTCACGCCTGTAATCCCAGCACTTTGGGAGGCCGAGGCGGGCGG
chrom GTT---GATTCAATAATAAACAAATAGAATTCCTTAATACTTGGCTTACTTAA-----
right GTT---GATTCAATAATAAACAAATAGAATTCCTTAATACTTGGCTTACTTAA-----
*22222*222*22*22222**222*22***2*2222222***2222*22*222222222

```

Other Simple Repeat Low Complexity DNA LTR LINE SINE

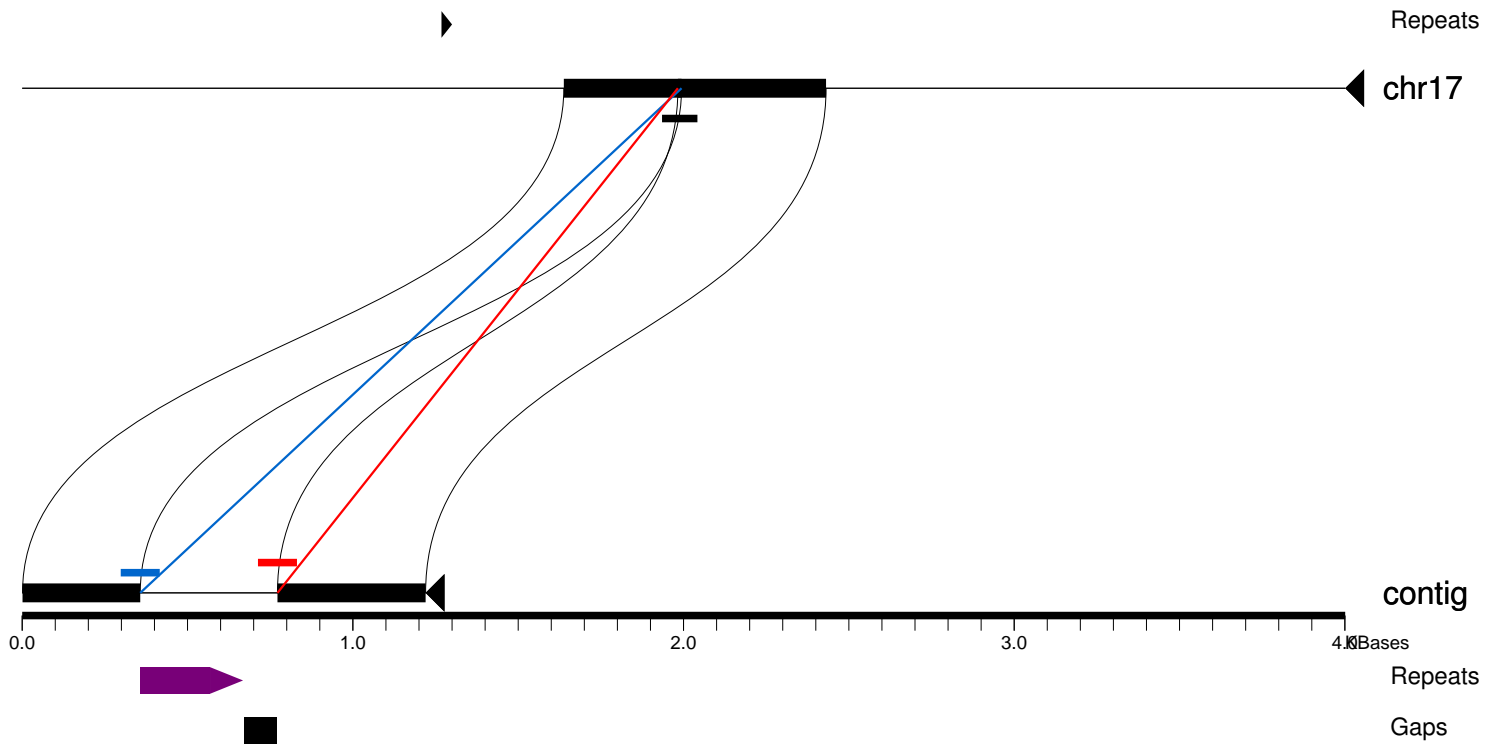

siteID: chr17\_60434048 Scaffoldig2 + Breakpoint: chr17:60434032

chr17:60433989-60434091

Overlap Length: 17 INS size: 452 Genotyped: No

left TCTTCTCTTT----TCCC----TGGTG--AATCCAG-----CCTACGTTCCCTCATGCAGTATACATTA  
chrom TCTTCTCTTT----TCCC----TGGTG--AATCCAG-----CCTACGTTCCCTCACGCAGTATACATTA  
right CACCCGCCTCGGCCTCCCAAAGTGCTGGGATTACAGGCGTGAGCCACCGTGCCCGGC-CGTATACATTA  
1111\*1\*1\*11111\*\*\*\*1111\*\*1\*\*11\*1\*1\*\*\*1111111\*\*11\*\*1\*\*11121\*1\*\*\*\*\*

left TTTCTTTTTTTNNNNNNNNNNNNNNNNNNNNNNNNNNNNNNNNNNNNNNNNNNNNNNNNNNNNNNNNNNNNNN  
chrom TTTCTTTGT-----GCTGGGTCCCTGGTCCCTGTTTTGCCACAGACTTGCTGACAA  
right TTTCTTTGT-----GCTGGGTCCCTGGTCCCTGTTTTGCCACAGACTTGCTGACAA  
\*\*\*\*\*2\*222222222222222222222222222222222222222222222222222222222222222222

Other Simple Repeat Low Complexity DNA LTR LINE SINE

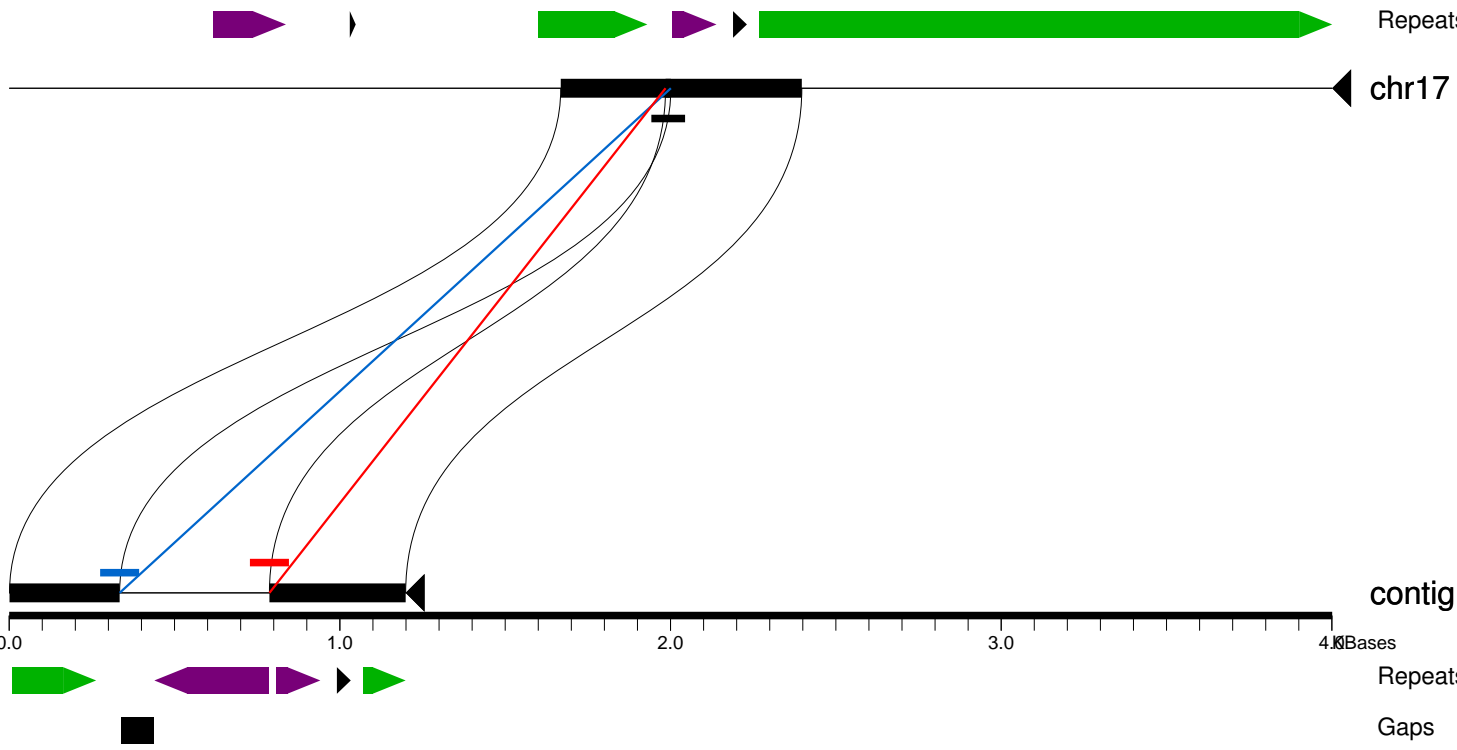



siteID: chr17\_6538654 Scaffitg1 - Breakpoint: chr17:6538658

chr17:6538498-6538831

Overlap Length: 14 INS size: 302 Genotyped: Yes

```
left -----TTCAGACCAACAGCGTTGAACAAGGGAAAAAGAACAGATAAAACACAGTGCCATGTG
chrom CGAAACAAAGCTACTTTCAGACCAACAGCGTTGAACAAGGGAAAAAGAACAGATAAAACACAGTGCCATGTG
right -GAGA-----ATGGCGT-GAACCCGGGAGGCG----GAGCTTGCAGTGAGCCGAGAT
      22N2          1111111111*11****1****11****111*1111**11111**11*1***11*11
```

```
left CATGTAGCAATATACTAGAAGTAGCCAATAGTAACCTCATACTGAGAGTGACTGCTTAATGACAGGTAAA
chrom CATGTAGCAATATACTAGAAGTAGCCAATAGTAACCTCATACTGAGAGTGACTGCTTAATGACAGGTAAA
right CCCGC--CACTGCACTCCA----GCC--TGGG--CGACAGAGCGAGACTCCGT-CTCAAAAAAAAAAAAA
      *11*111**1*11**11*1111**11*1*111*11**1*11****1*111*1**1**11*1*111**
```

```
left TGATAGTTTCTTCCATTTATAAAAAGCAACCACAC---GGCCGGGCGCGGTGGCTCACGCCTGTAATCCCA
chrom TGATAGTTTCTTCCATTTATAAAAAGCAACCACACCTTTGGAAGTTCCAATTTCAAAAAACAAAAAATA
right AAAAA-----AAAAAAACAAACACACTTTGGAAGTTCCAATTTCAAAAAACAAAAAATA
      11*1*111111111111111*1****1****1*****222**22*22*2*22*22*22*2222**2222*
```

```
left G-----CACTT-----TGGGAGGCC---GAGGCGGCGGATCACGAGGTCAGGAGATCGAGA---
chrom GGGGAACACTTACTATTTTAATAATAATCTCTTGAGCCCTTCCATTCCAAATTTCAAATCTCAAAGGTC
right GGGGAACACTTACTATTTTAATAATAATCTCTTGAGCCCTTCCATTCCAAATTTCAAATCTCAAAGGTC
      *22222*****2222222222*222*22*2222***2*222222*22*2*22*2222*22**2*22222
```

```
left -CCATCCCGGCT-----AAAACGGTGAAACCCCGTC-TCTACTAAA-----
chrom TCCAGCAAGGCGTTATTCCCAAAAACAGAGCTTTGCCATGGTAAACTAGCATGTT
right TCCAGCAAGGCGTTATTCCCAAAAACAGAGCTTTGCCATGGTAAACTAGC-----
      2**2*22**2222222222*****2*2*22222**2*22*22****22
```

Other Simple Repeat Low Complexity DNA LTR LINE SINE

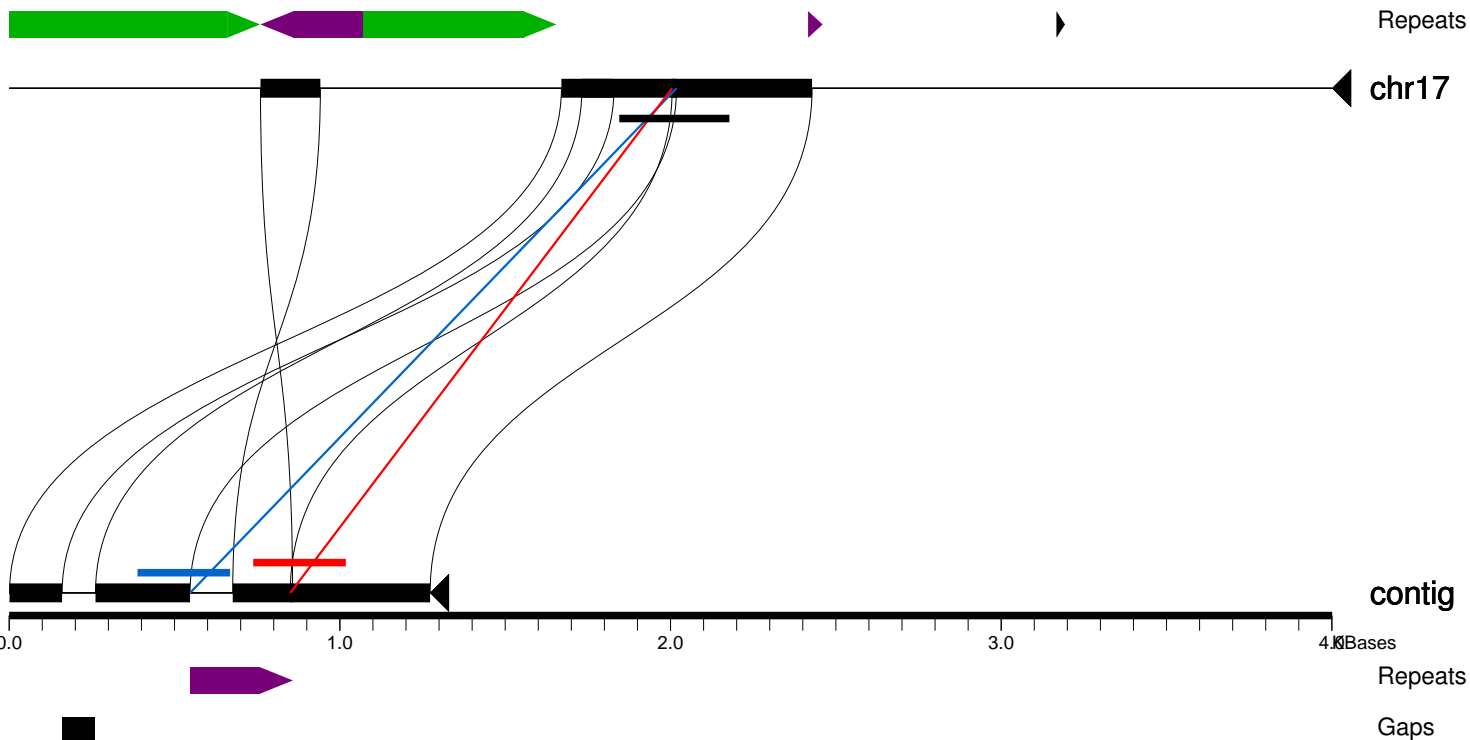

siteID: chr17\_67875366 Scafftig3 + Breakpoint: chr17:67875350

chr17:67875303-67875409

Overlap Length: 13 INS size: 349 Genotyped: No

```
left  TTACCAGCA-----ATATTTA--TTTTTGGG--ACCAGAAATATATAGGTTGACAT---GTAATGCCATC
chrom TTACCAGCA-----ATATTTA--TTTTTGGG--ACCAGAAATATATAGGTTGACAT---GTAATGCCATC
right CCGCCTGCCTCGGCCTCCCAAAGTGCTGGGATTACAGGCGTGAGCCACCGTGCCCGGCCGTAATGCCATC
      111**1**1111111*1111*11*11*1***11**11*1111*111*111**1*11111*****
```

```
left  TTTTNNNNNNNNNNNNNNNNNNNNNNNNNNNNNNNNNNNNNNNNNNNNNNNNNNNNNNNNNNNNNNNNNNNN
chrom TT-----AAAGATCATGATGAATGATGAGCTACTGGGAAAAGAAGGCTTTGGTG
right TT-----AAAGATCATGATGAATGATGAGCTACTGGGAAAAGAAGGCTTTGGTG
      **2222222222222222222222222222222222222222222222222222222222222222
```

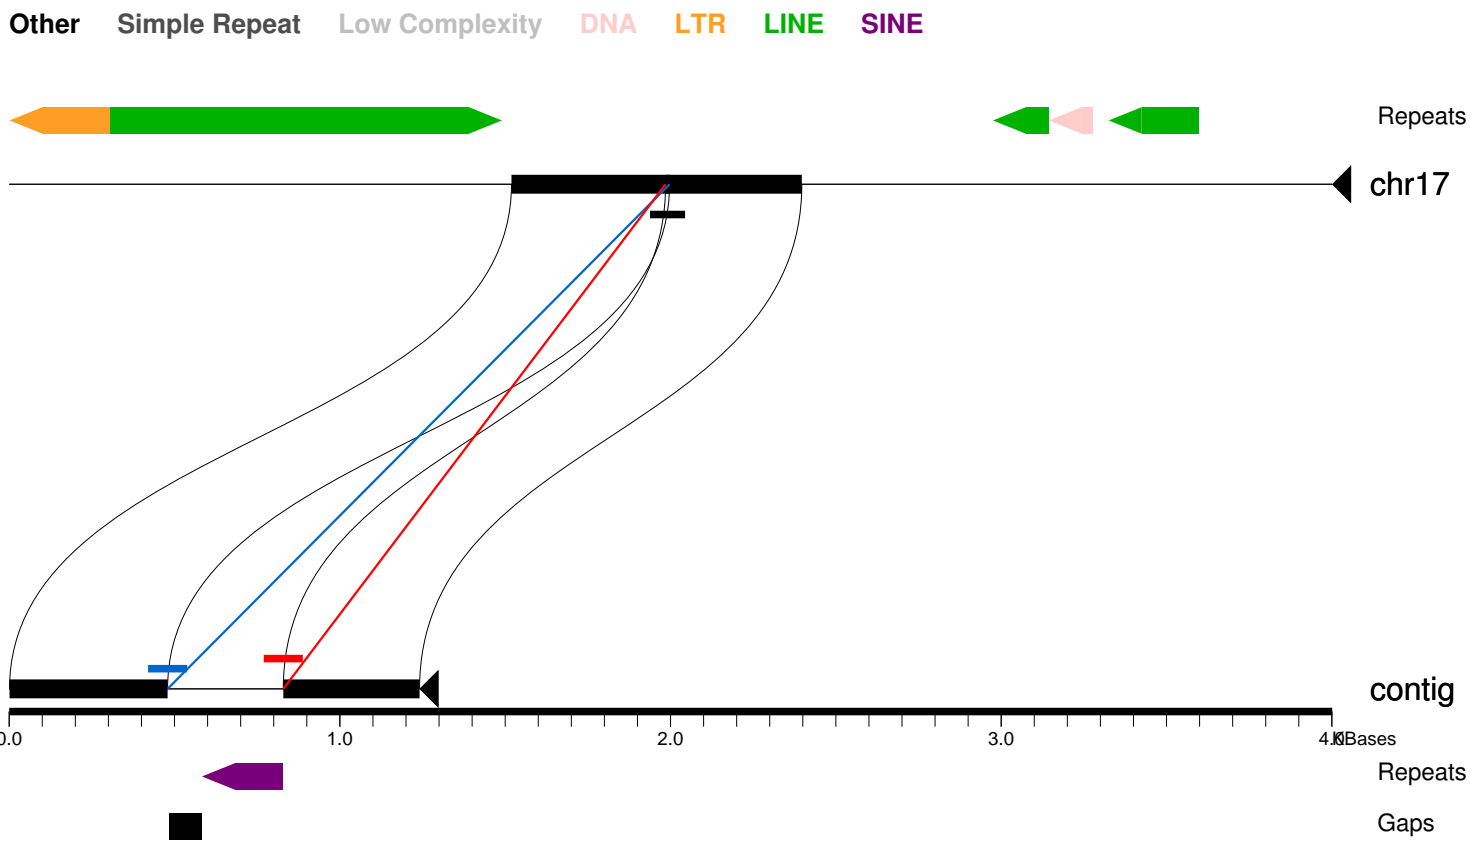





siteID: chr17\_68327417 Scaffitg1 + Breakpoint: chr17:68327425

chr17:68327380-68327484

Overlap Length: 15 INS size: 305 Genotyped: Yes

```
left  ATAAAAAAGGATGAGTTC---ATGTCC----ATTGCAGG-----GACATGGATGATG--CTGGAAACCAT
chrom ATAAAAAAGGATGAGTTC---ATGTCC----ATTGCAGG-----GACATGGATGATG--CTGGAAACCAT
right TCCGCCCCTCGGCCTCCCAAAGTGCTGGGATTACAGGCGTGAGCCACCGCGCCCGGCCTGGAAACCAT
      11111111111111111111*1111*1111*1**1*11111***1****111111*1**11*111111*11*****
```

```
left  CATTTTTTTTTTTTTTTTTTTTTTTTTTTTTTTTTGAGACGGAGTCTCGCTCTGTGCGCCAGGCTGGAG
chrom CATTCTAAGCAAACCTATTG-----CAAGGACAAAAAACCAAACACTA-----CATGTTC---
right CATTCTAAGCAAACCTATTG-----CAAGGACAAAAAACCAAACACTA-----CATGTTC---
      ***2*22222222*2**222222222222**2*222*22*222*2**222222**2*2*2222
```

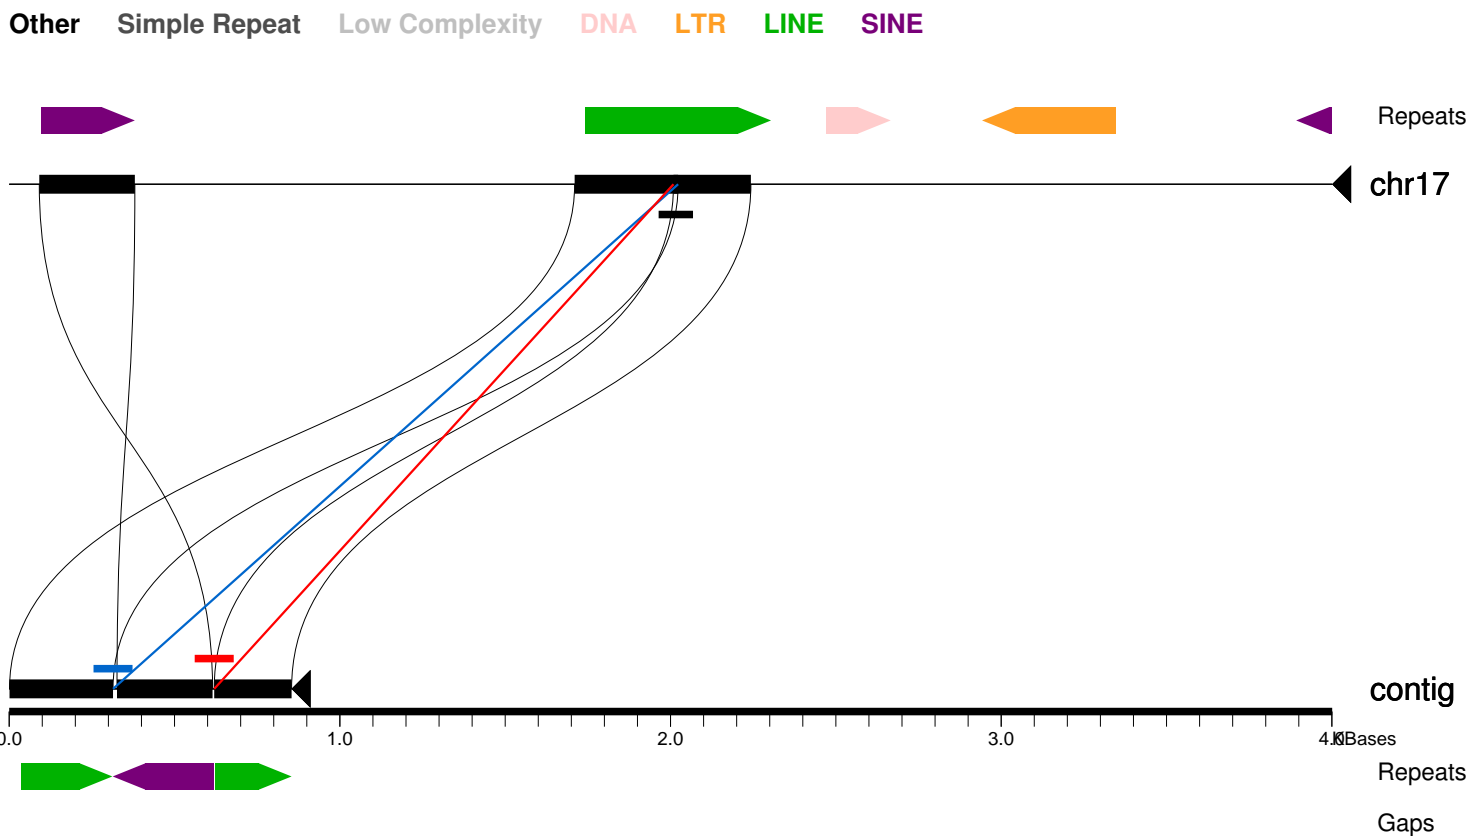

siteID: chr17\_72620197 Scafftig10 - Breakpoint: chr17:72620207

chr17:72620158-72620266

Overlap Length: 11 INS size: 296 Genotyped: Yes

```
left  A-----TCGATCTAAGGAG-CTTCCCTTCTCTATGGCTGCCTACTTTTGAATCATAAAACACCCTC
chrom A-----TCGATCTAAGGAG-CTTCCCTTCTCTATGGCTGCCTACTTTTGAATCATAAAAACACCCTC
right GCCACTGCACTCCAGCCTGGGCGACAGAGCGAAACTCCGCCTCAAAAAAAAAAAAAAAAAAAAAA AAAACACCCTC
      111111111111**1*1*1111**1*1*1111*1111**11*1**1111*111111**11*1*****
```

```
left  GGCCG--GGCGCGGTGGC--TCACGCCTGTAATCCCAGCACTTTGGGAGGCCGAGACGGGCGG
chrom TACTTAAGGAGCTGTGGTGATCACTC-----CCCATGTCTTTCTCA-----ACCGTTAT
right TACTTAAGGAGCTGTGGTGATCACTC-----CCCATGTCTTTCTCA-----ACCGTTAT
      22*2222**2**2****222****2*2222222****222****222*2222222**2*2222
```

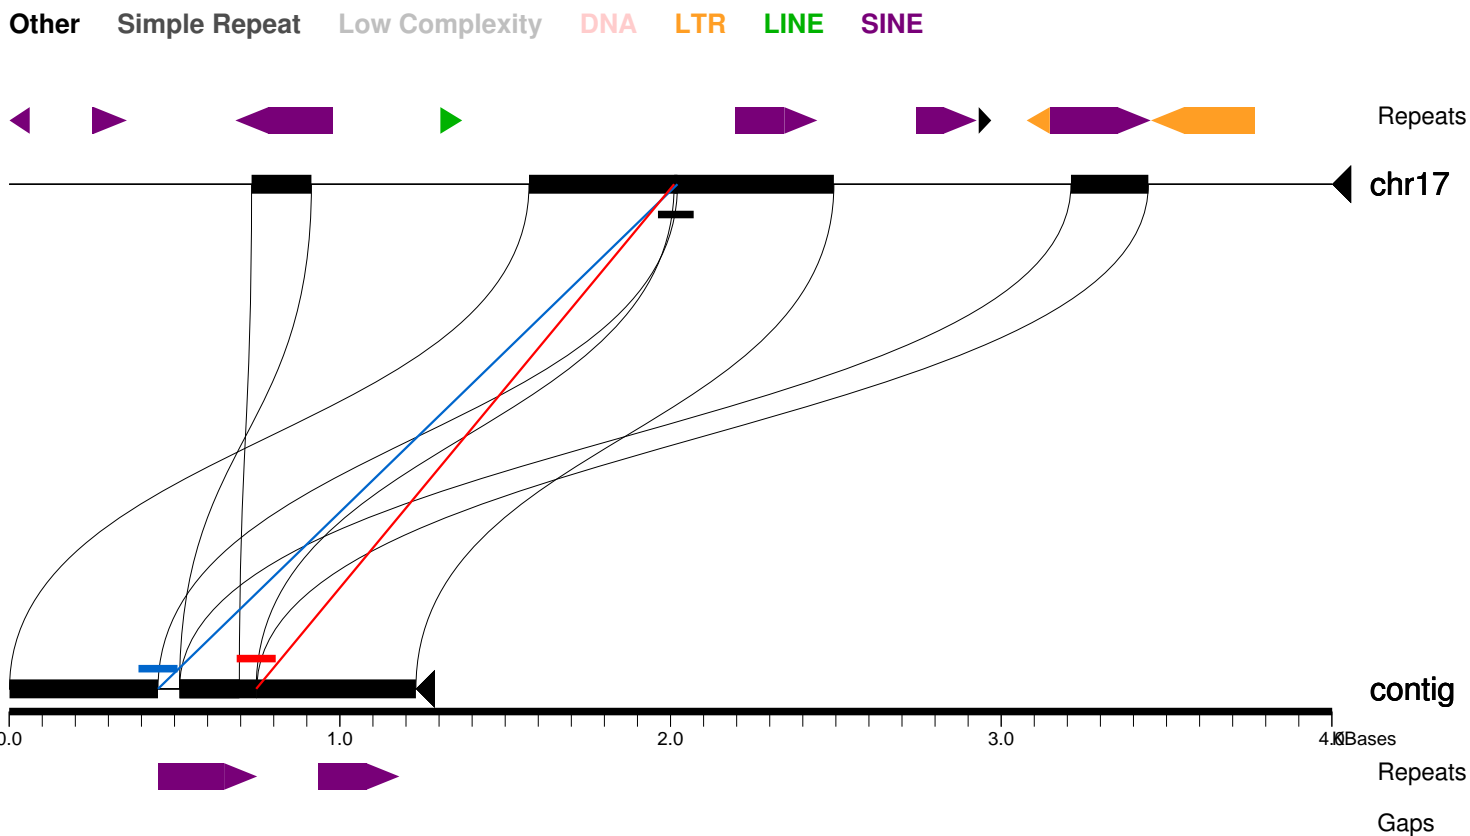

siteID: chr17\_74046828 Scafftig1 - Breakpoint: chr17:74046810

chr17:74046765-74046869

Overlap Length: 15 INS size: 460 Genotyped: No

```
left  -----TAATGGTTTCTCATAGCCTTAGTCATTCA----TTATTCATATGGAAAG---GGGAGTTCTAT
chrom -----TAATGGTTTCTCATAGCCTTAGTCATTCA----TTATTCATATGGAAAG---GGGAGTTCTAT
right CCGCCCGCCTCGGCCTCCCAAAGTGCTGGGATTACAGGCGTGAGCCACCGCGCCCGCCGGAGTTCTAT
      111111111111**11**1**1**111*1*111*1**1111*1*11**1111*111*111*****
left  TTTTNNNNNNNNNNNNNNNNNNNNNNNNNNNNNNNNNNNNNNNNNNNNNNNNNNNNNNNNNNNNNNNNNN
chrom TTTTAAAAGCAAACATGCTGAAAAAGCTGTCTGCATAACTGATCTGAGA-----
right TTTTAAAAGCAAACATGCTGAAAAAGCTGTCTGCATAACTGATCTGAGA-----
      ***222222222222222222222222222222222222222222222222222222222222222222
```

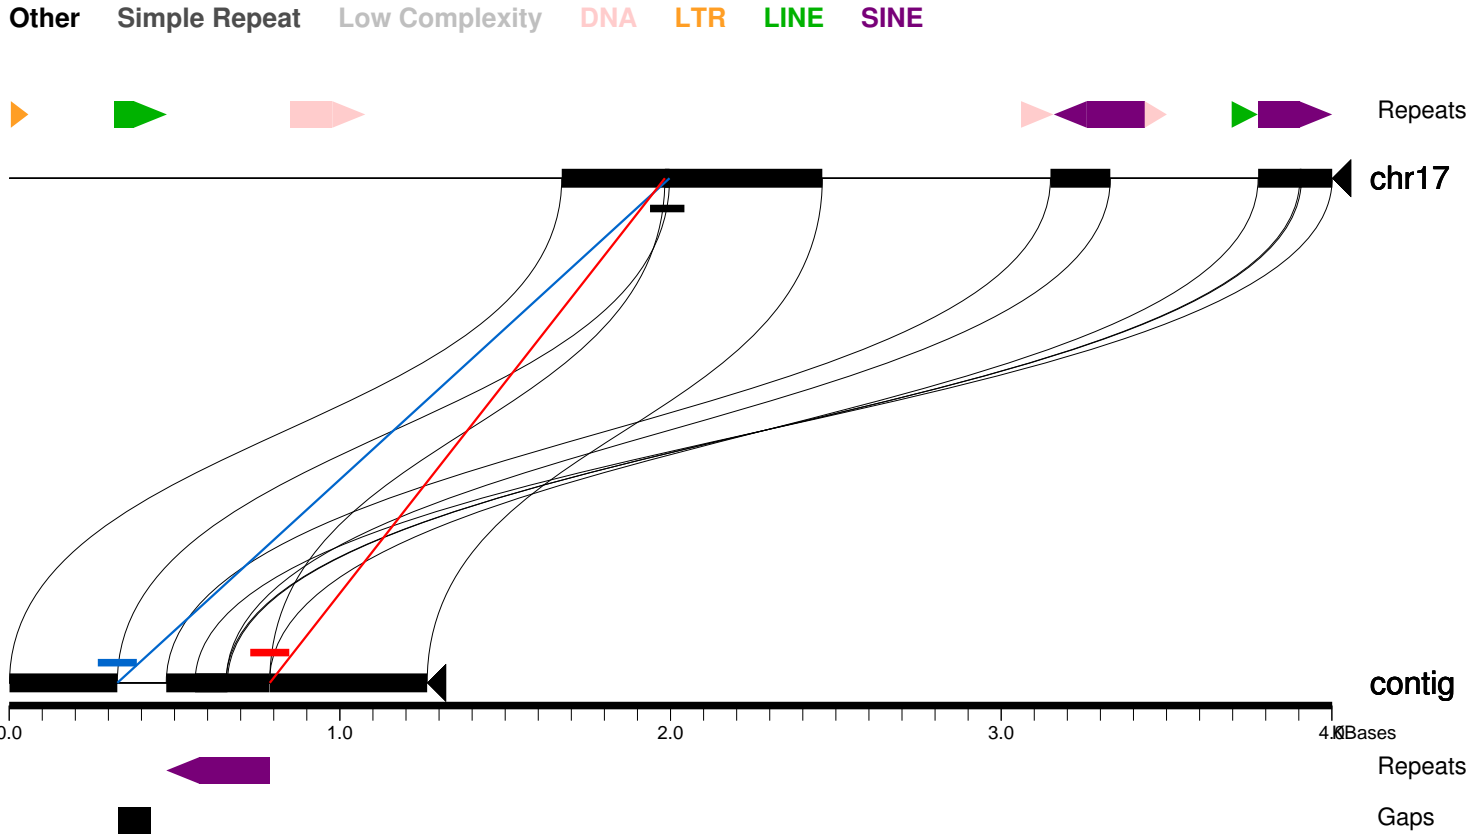

siteID: chr17\_78356489 Scaffitg3 - Breakpoint: chr17:78356522

chr17:78356362-78356695

Overlap Length: 14 INS size: 417 Genotyped: No

```
left      C-----CACATC-TG
chrom     CAGAGTCACACTGATGAAATGACAGAATCCTGGAAGCAGGTGGACAGTTCCCGCAGCACTCCACATC-TG
right     TTTAGT---AGAGACGGGGTTTCAC---CTTGTTAGCCAG--GATAGT-CTCG-ATCTCCTGACCTCATG
1NN222   2NN22N2NNN2NN22N   2N22NN222NN2  22N222  2N22  2N2N2NN1**1**1**
```

```
left      TGTGGTCTGCCTCAGGGTTTGGGTGGCAGCAGCTGAGACGGCTGGCGGTAGCCTGGGCCACTCTTACTAT
chrom     TGTGGTCTGCCTCAGGGTTTGGGTGGCAGCAGCTGAGACGGCTGGCGGTAGCCTGGGCCACTCTTACTAT
right     ATCCACCCGCCTCGGCCTCCCAAAGT-----GCTGGGATTTACAGGCG-----TGAGCCACC-----
1111111*1*****1*11*1111111*1111111*****1**111*1****1111111*1*****1111111111
```

```
left      TGAGCTCAAGTTCTGTTATTTTCAGTAATTTTTTTTC-----
chrom     TGAGCTCAAGTTCTGTTCTTTTCAGTAATTTTTTTTCAAAAATGGGTCTAAGATTACAATTATGTAGGATAGA
right     -GCGCCCGGC-----CAGTAATTTTTTTTCAAAAATGGGTCTAAGATTACAATTATGTAGGATAGA
1*1**1*11111111111N111*****22222222222222222222222222222222222222222222222222222222
```

```
left      ----TTTTT-----TTTTTTTTTTTTTT-----
chrom     GGAATTTTTTAGAGATTGATGTTATCTTCAAAAAGGTCATTAAGTTGGTGGTAACAACAGGAACTACTTCAA
right     GGAATTTTTTAGAGATTGATGTTATCTTCAAAAAGGTCATTAAGTTGGTGGTAACAACAGGAACTACTTCAA
2222*****22222**22*2**2**2**2222222222222222222222222222222222222222222222222222222
```

```
left      -----TTTNNNNNNNNNNNNNN
chrom     AATACTTAGATTAATTTAGAAAAGCTATTACCTCAAAAACGAGTGTATTCTATTATTA
right     AATACTTAGATTAATTTAGAAAAGCTATTACNNNNNNNNNNNNNNNNNNNNNNNNNNNNNN
22222222222222222222222222222222222222222222222222222222222222222222222222222222222222222
```

Other Simple Repeat Low Complexity DNA LTR LINE SINE

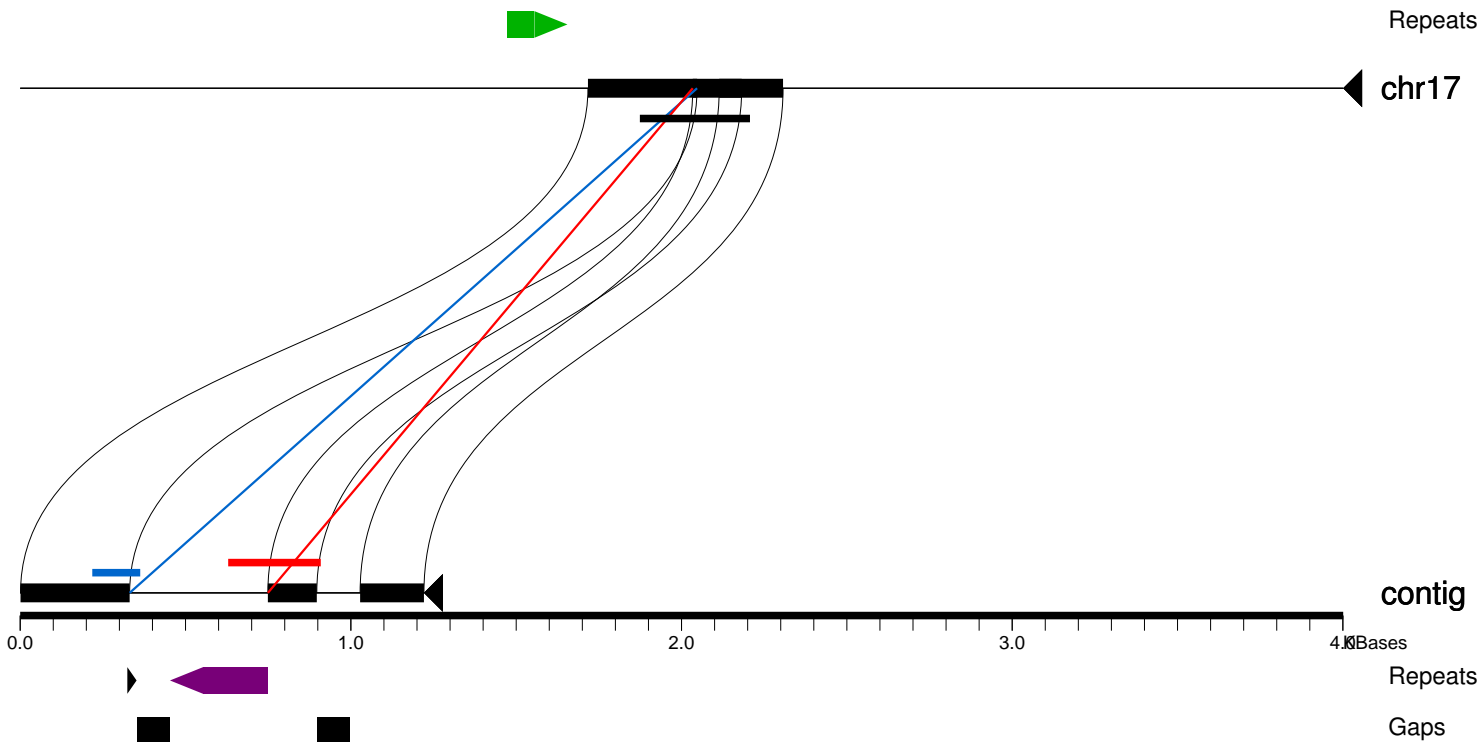

siteID: chr18\_11069069 Scaffitg1 - Breakpoint: chr18:11069073

chr18:11068913-11069248

Overlap Length: 16 INS size: 298 Genotyped: Yes

```
left  A-----TGAATAAAATTCCTAGCAATATACAACCTACCATGATGGAATCATGAAGAAATAAAAA
chrom AACCTAGAGGAAATGAATAAAATTCCTAGCAATATACAACCTACCATGATGGAATCATGAAGAAATAAAAA
right TT--TAGTAGAGACGGGGT--TTC--ACCGTTTTAG-----CCGGGATGGTCTC-----GATCTC-----
1N 222NN22N21*111111***11*1*11*1**1111111**11*****11**11111**11*11111
```

```
left  ATCTGAGCAGACTAGTAAAAAGTAAGGAGATTGGAATCGGTGATAAAAAAGTCTCCCCTCAAAAATAAATG
chrom ATCTGAGCAGACTAGTAAAAAGTAAGGAGATTGGAATCGGTGATAAAAAAGTCTCCCCTCAAAAATAAATG
right --CTGACC----TCGTGATCCGCCCGCC-----TCGGCCTCCCAAAGTG----CTGGGAT-TACAGG
11***1*1111*1**1*111*111*1111111111***111111***11111**111*11**1*1*
```

```
left  AATAAATAAATAAAAGCC-CAGGACCTCATGAATTCCTT-----TTT-----TTTT
chrom AATAAATAAATAAAAGCC-CAGGACCTCATGAATTCCTACCAAACATTTAAGGAGAAATAATATCAATTCT
right CGTGAGCCACCGCGCCCGCCCGCCGACCTCATGAATTCCTACCAAACATTTAAGGAGAAATAATATCAATTCT
11*1*111*11111111*11*1*****2222222**2222222222222222**2*
```

```
left  TTT----TTTTTG-----AGACGGAGT-CTCGCTCTGTGCGCCAGGCTGGAGTGCAGTGG
chrom TCTCAAATTCCTTCCAAGAAAAATTAAGAAGAGGGAATACTTGCAAAGTCATCCTATGTGGTCATCACTAC
right TCTCAAATTCCTTCCAAGAAAAATTAAGAAGAGGGAATACTTGCAAAGTCATCCTATGTGGTCATCACTAC
*2*2222**2**2222222222222222***2***2*2**2**222***22**2222***2222**2*22
```

```
left  CGGGATCTCGGCTCACTGCAAGCTCCGCCCTCCGGGTTACGCCATTCTCCTGCCTCAG--
chrom CCTGATACCAAAACCAGACAAGGATAA--TACAAGG--AAAGAAAATTACAGGCCAGTGTC
right CCTGATACCCACAC-AGACT-----TACA-----GCAAATTT--GGTCTTACNN
*22***22*N2N2*N222*111NNNN22*2*2N1122N1N*N2*2*2N1N2*1*NNN1NN
```

Other Simple Repeat Low Complexity DNA LTR LINE SINE

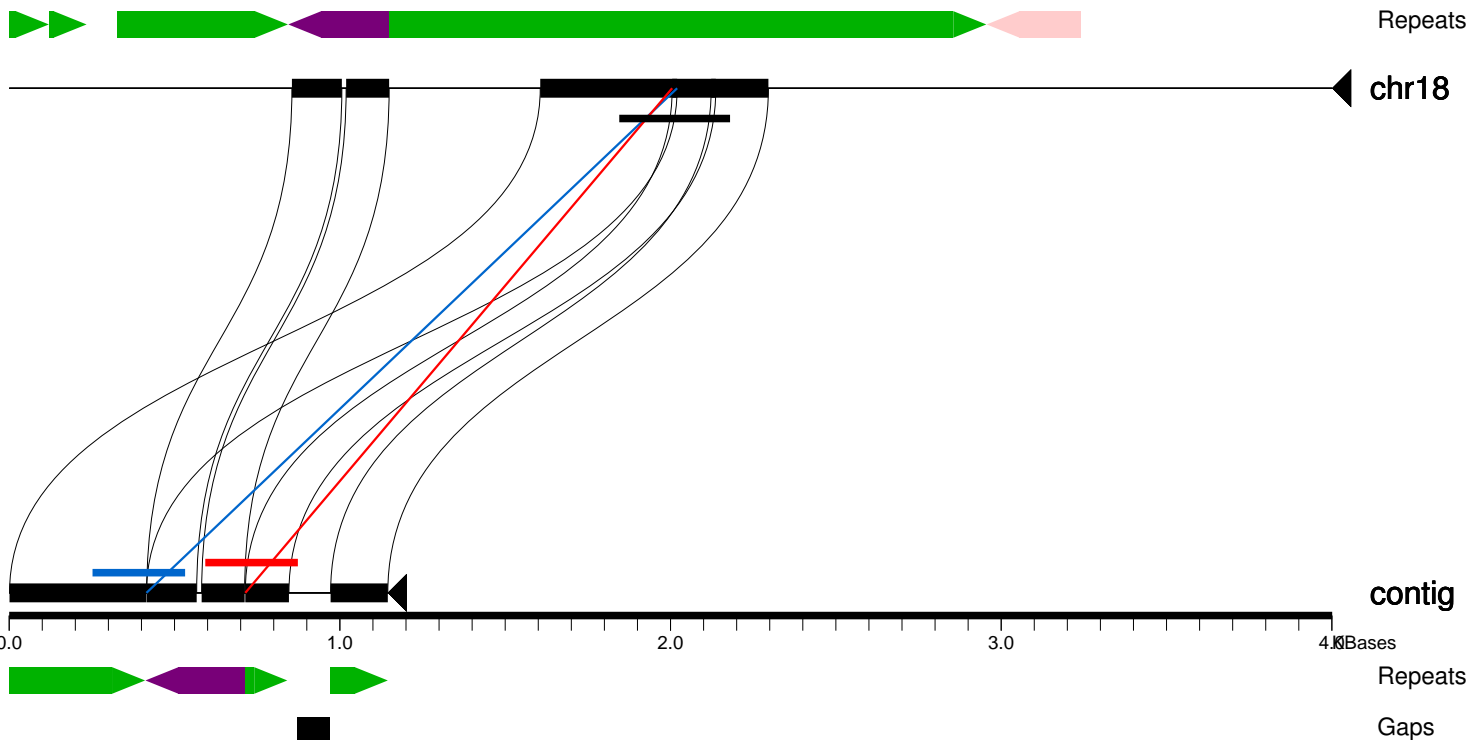

siteID: chr18\_1235779 Scaffoldig17 - Breakpoint: chr18:1235778

chr18:1235731-1235837

Overlap Length: 13 INS size: 311 Genotyped: Yes

```
left  ATATGATTGCTTTTAAG-----TCAGTT----AAGAAATTTGCAAATATAGTTTTTAAAAATAATTA
chrom ATATGATTGCTTTTAAG-----TCAGTT----AAGAAATTTGCAAATATAGTTTTTAAAAATAATTA
right TCCAGCCTGGGCGACAGAGCGAGACTCCGTCTCAAAAAAAAAAAAAAAAAAAAAAAAAAAAAAATAATTA
      1111*11*111111*11111111*1*11111*1***11111***1*1*111111*****
```

```
left  CAGGCCGGGCGCGGTGGCTCACGCCTGTAATCCCAGCACTTTGGGAGGCCGAGGCGGGCGG
chrom CATAA-----ACAAGTACTTTTACTGGCA-CTCTATTTTATCATGTGGACTTGAA
right CATAA-----ACAAGTACTTTTACTGGCA-CTCTATTTTATCATGTGGACTTGAA
      **222222222222222*22222*2*2**2*22**2*2**2*222*222*2**222222
```

Other Simple Repeat Low Complexity DNA LTR LINE SINE

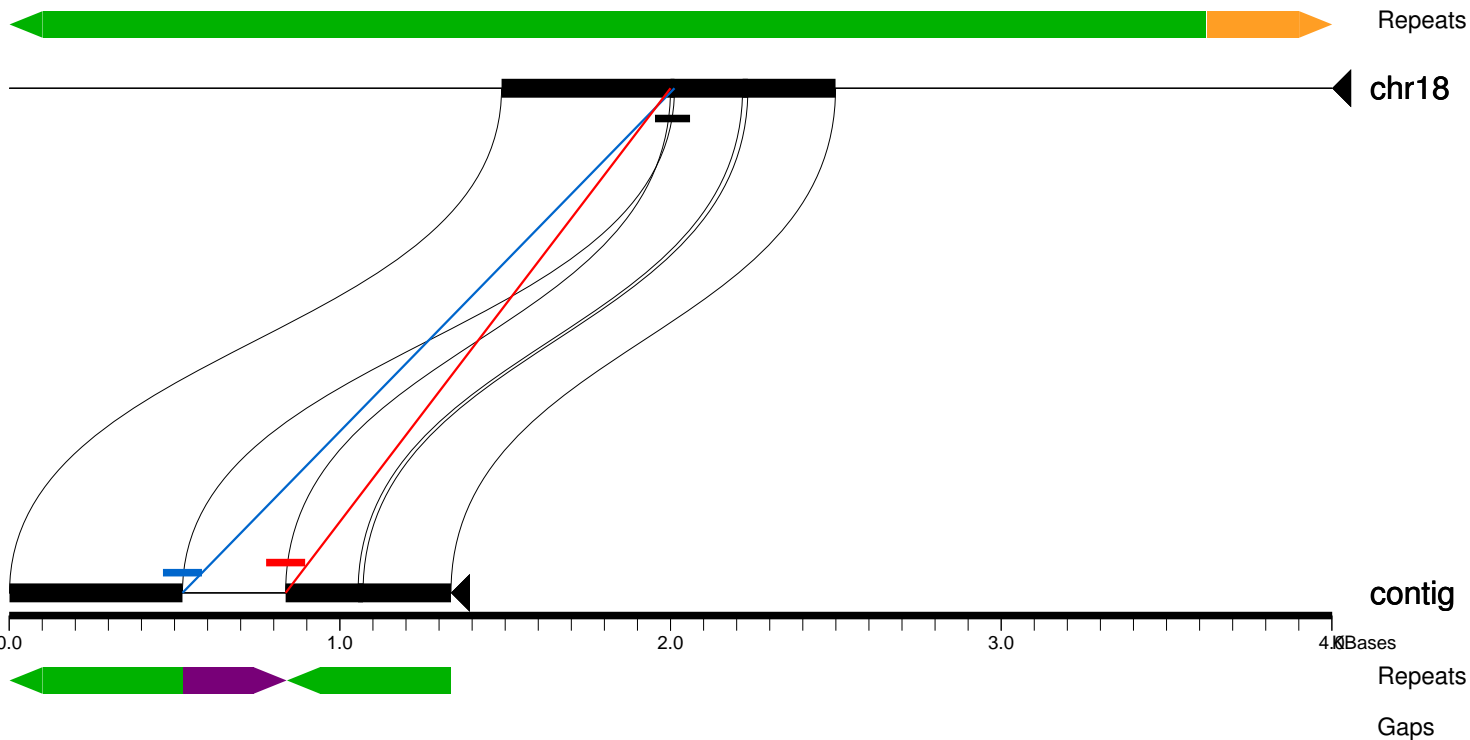

siteID: chr18\_1830649 Scafftig2 + Breakpoint: chr18:1830654

chr18:1830607-1830713

Overlap Length: 13 INS size: 295 Genotyped: Yes

```

left AACAC-----GCCTACTATA-TGTTAGTCTCA-----GTTACTCATAAAAAACATAGTACTGGACAGA
chrom AACAC-----GCCTACTATA-TGTTAGTCTCA-----GTTACTCATAAAAAACATAGTACTGGACAGA
right TCCGCCCGCCTCGGCCTCCCAAAGTGCTGGGATTACAGGCCTGAGCCACCGCGCCC--GGCTGGACAGA
      11*1*111111111*****1*1*1*1**1*1*11*1*11111**1*11**111111*111*11*****

```

```

left TCTTTTTTTTTTTTTTTTTTTGAGACGGAGTCTCGCTGTCGCCAGGCAGGAGTGCAGTGGCGC
chrom TCTTATAAACAGAAATTTTTA----GTAGACTAGAA-TCTCCCTCTAGGCTTGA-----C
right TCTTATAAACAGAAATTTTTA----GTAGACTAGAA-TCTCCCTCTAGGCTTGA-----C
      ***2*22222222*****2222*2**2**2*222**2***2222***22**2222222*

```

Other Simple Repeat Low Complexity DNA LTR LINE SINE

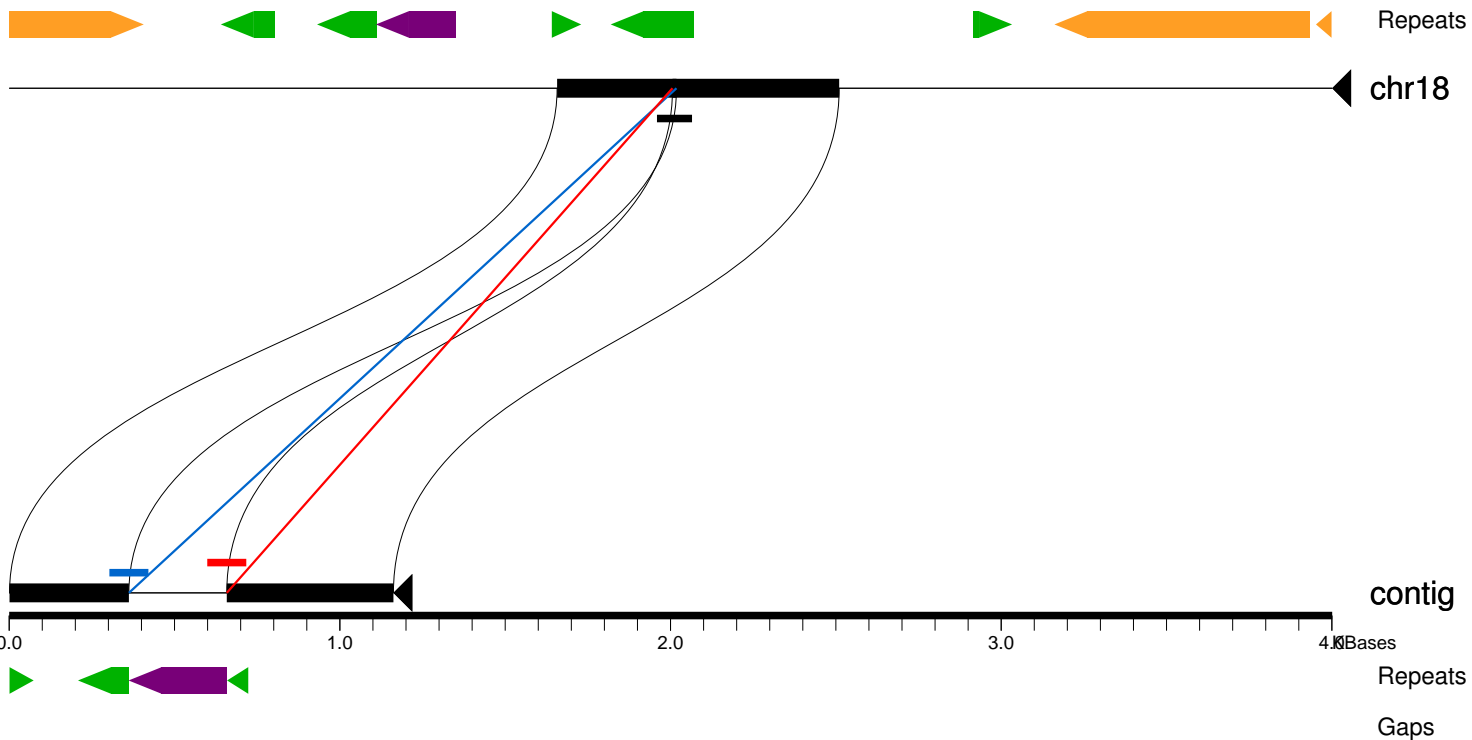



siteID: chr18\_19705164 Scafftig2 - Breakpoint: chr18:19705151

chr18:19705102-19705210

Overlap Length: 11 INS size: 482 Genotyped: No

```

left  -----TATAGTTACAAACATTTTACAAATATTG-CATCA-CCTTTTATTTAACATAAAAAACATTTT
chrom -----TATAGTTACAAACATTTTACAAATATTG-CATCA-CCTTTTATTTAACATAAAAAACATTTT
right  CGCCCGCCTCGGCCTCCCAAAGTGCTGGGATTACAGGCGTGAGCCACCGCGCCCGGCCAAAAACATTTT
       111111111*1111111*1*1**11*11*111*1**11*1*1*1*1*1**1111111111111111******
left  TTTTTTTNNNNNNNNNNNNNNNNNNNNNNNNNNNNNNNNNNNNNNNNNNNNNNNNNNNNNNNNNNNNNNNN
chrom ACATT-----ACTAAAAATCATTATAAAATACAATTTCTGATGTGTAATGTAGAT
right ACATT-----ACTAAAAATCATTATAAAATACAATTTCTGATGTGTAATGTAGAT
       222**2222222222222222222222222222222222222222222222222222222222222222222

```

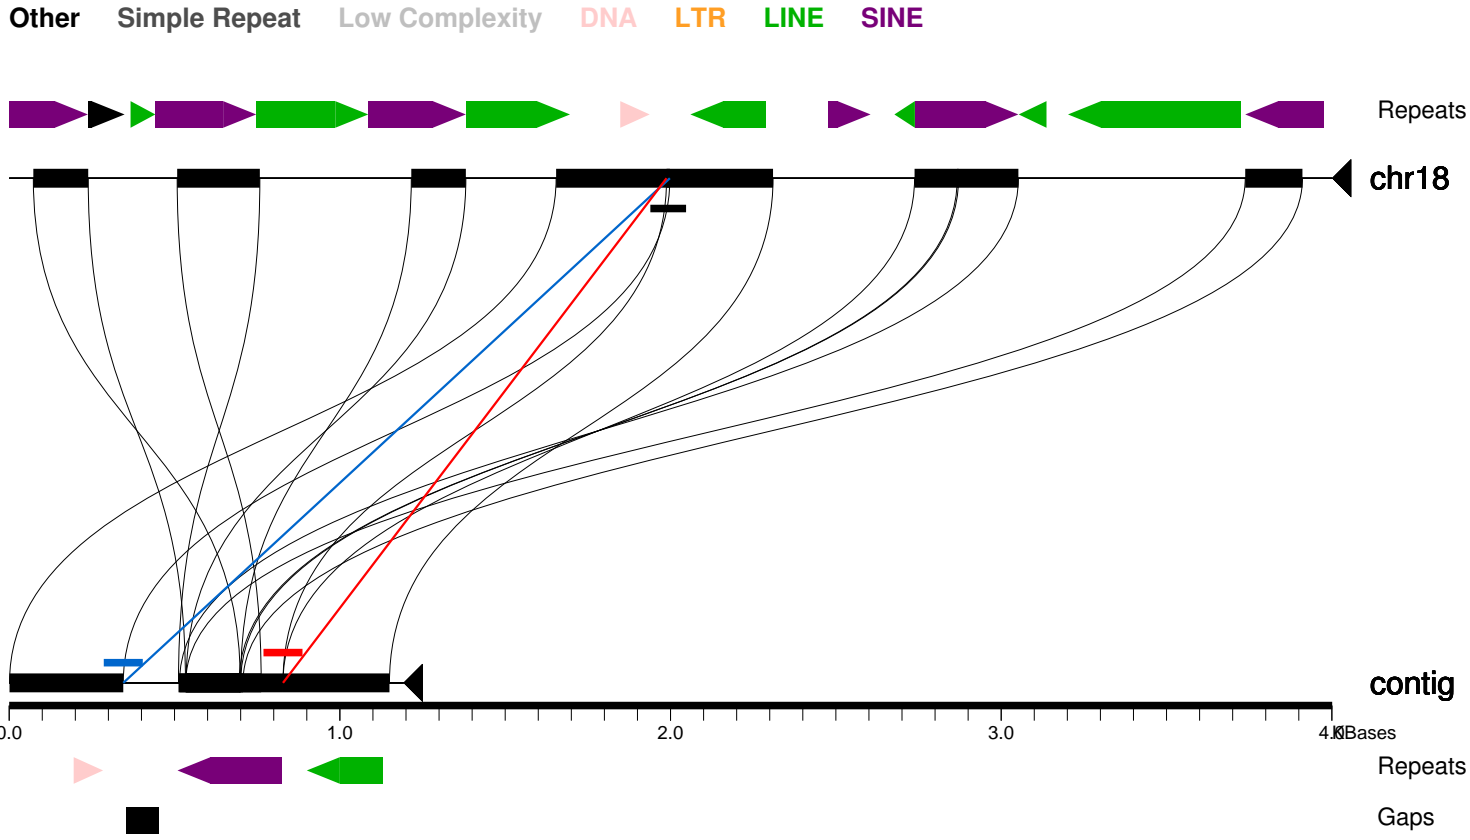

siteID: chr18\_22390137 Scaffoldig3 - Breakpoint: chr18:22390149

chr18:22390103-22390208

Overlap Length: 14 INS size: 300 Genotyped: Yes

```
left    ---GAAAA--AGCCTGTAGTTCCTA-CAATAC--AGT-----AGAATTAAAAATTTGTTTAAAAAGAGTTTT
chrom   ---GAAAA--AGCCTGTAGTTCCTA-CAATAC--AGT-----AGAATTAAAAATTTGTTTAAAAAGAGTTTT
right   ACTGCACTCCAGCCTGGGCGACAGAGCGAGACTCCGTCTCAAAAAAAAAAAAAAAAAAAAAAATAAAGAGTTTT
        111*1*1111*****11111*11*1*1*1**111**11111*1**11****1111111******
left    ATGGGCCGGGCGCGGTGGCTCACGCCTGTAATCCCAGCACTTTGGGAGGCCGAGGCGGGCGG
chrom   ATGAAAAGTAAACAAAAACTAA-----ACCAACACATA---AGATTATAGTAAATAA
right   ATGAAAAGTAAACAAAAACTAA-----ACCAACACATA---AGATTATAGTACATAA
        **2222*2222*22222**2*2222222222***2***2*2222**22222*22N2222
```

Other Simple Repeat Low Complexity DNA LTR LINE SINE

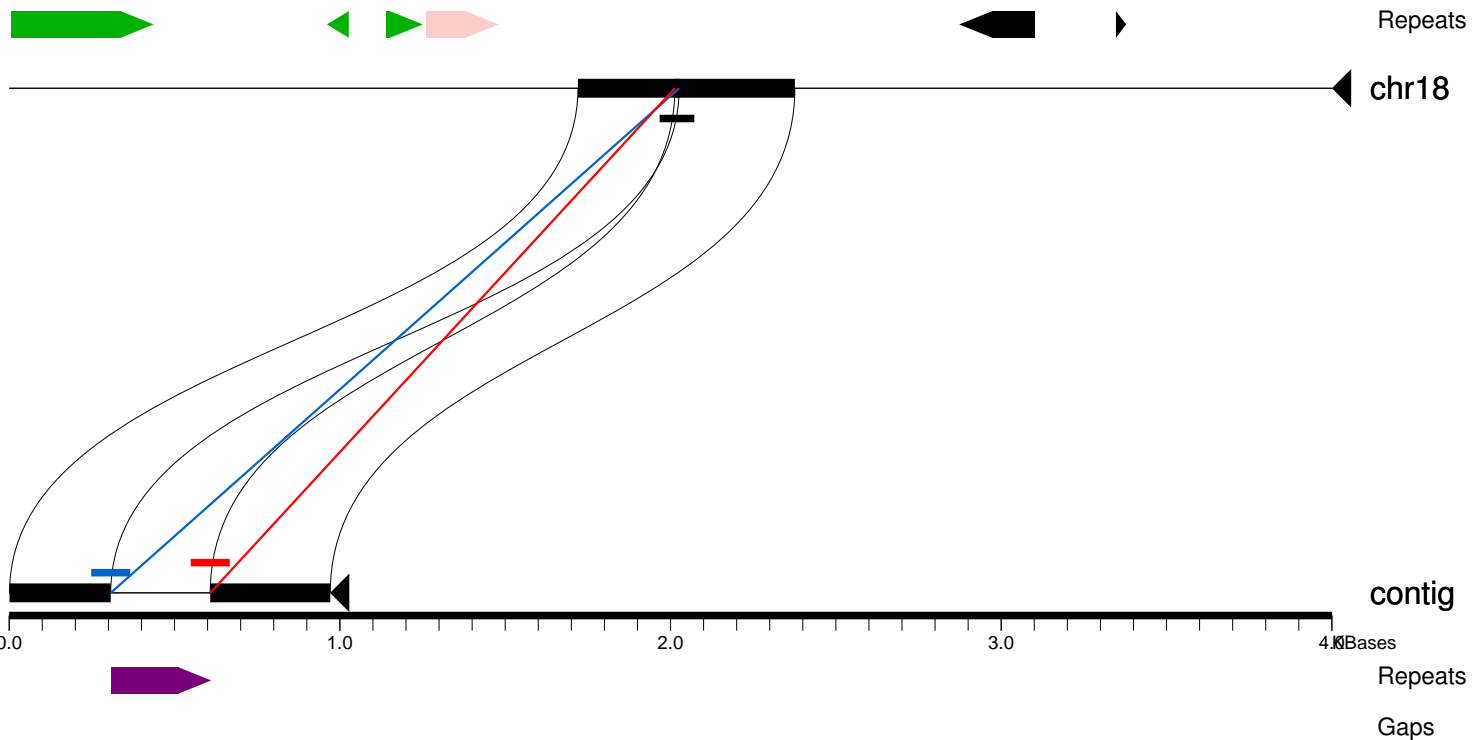

siteID: chr18\_2304388 Scaffitg2 + Breakpoint: chr18:2304393

chr18:2304348-2304452

Overlap Length: 15 INS size: 257 Genotyped: Yes

```
left   ATTATGTAA--AT----TCCAAGAGGTGTAAAAG-GTTCTGAAACTTTTG--CT----TCTACTGGGCT
chrom  ATTATGTAA--AT----TCCAAGAGGTGTAAAAG-GTTCTGAAACTTTTG--CT----TCTACTGGGCT
right  TGTTAGCCAGGATGGTCTCGATCTCCTGACCTCGTGATCCGCCCGTCTCGGCCTCCCAA>TCTACTGGGCT
      11*11*11*11**1111**1*11111**11111*1*1**1*1111*1*1*11**11111*****
left   TTTTFFFFFFFFFFFFFFFFTTTGGAGACGGAGTCTCGCTCTGTGCGCCAGGCCGGAGTG-CAGTGGCG
chrom  TTTTAAACCCAA-----AGAATCAAAGGAAAAGTTTTGTGACACA-----AATGACAATGA--
right  TTTTAAACCCAA-----AGAATCAAAGGAAAAGTTTTGTGACACA-----AATGACAATGA--
      ***2222222222222222**22*22**2222*2*2***22*2**222222*2**2**2**222
```

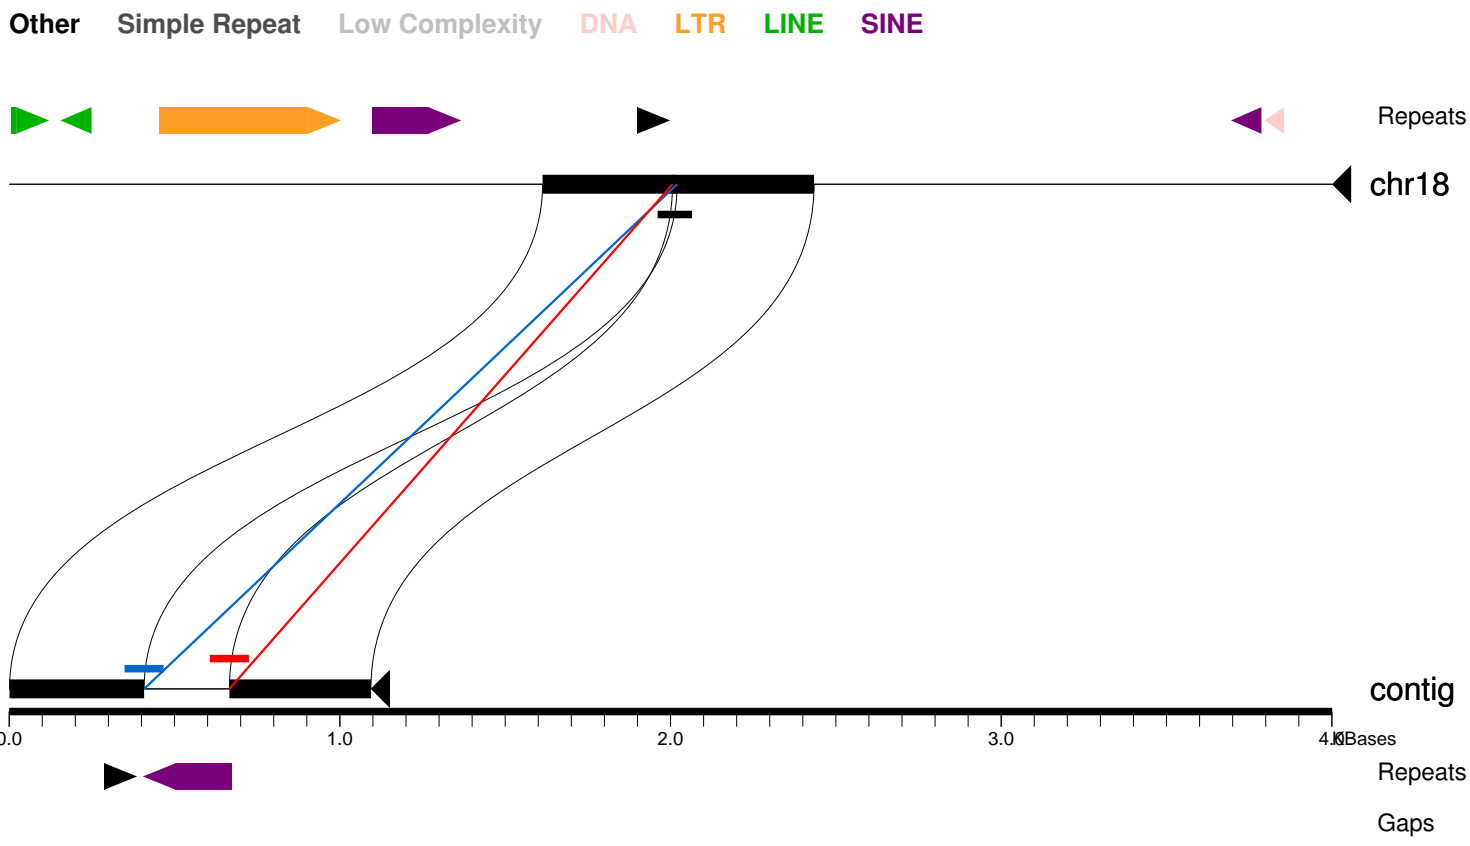

siteID: chr18\_25851192 Scafftig1 + Breakpoint: chr18:25851172

chr18:25851012-25851347

Overlap Length: 16 INS size: 336 Genotyped: Yes

```
left AT-----TTATGTCTATTTTATGTGATTACCATGCCATTTTGATTACTGTAACCTTGAAATATATTT
chrom CTATTTGTCTTTATGTCTATTTTATGTGATTACCATGCCATTTTGATTACTGTAACCTTGAAATATATTT
right TT--TAGTAGAGACGGGG--TTTCACCTTGTTA----GCCAGGATGGTCTCG-----ATCTC
N* 2N22NN11*1*11111***1*11*11***1111****111*1*11*1111111111111111***1*1
```

```
left TTGAAATCAGGGAGTGAGGCTTCCCATTTTGATCTTTTCACTCAAGATTGCTTTGGCTATTTAAGATCAT
chrom TTGAAATCAGGGAGTGAGGCTTCCCATTTTGATCTTTTACTCAAGATTGCTTTGGCTATTTAAGATCAT
right CTGACCTCA-----TGATCCA-CCCGCCTCGGCCT-----CCCAA-AGTGCTGGGATTA-----CAG
1***11***11111***11*11***111*1*11**111N1*1***1*1****11*11**111111111***1
```

```
left TTGTGGTCCAATATGAATTT--TAGGATTGTTTTTCTTTTTTTTTT-----TTTTTTTTTTTTTTTGGAG
chrom TTGTGGTCCAATATGAATTT--TAGGATTGTTTTTCTTAATTGTGTAAAGAATGCCATTGGGATTTAGGT
right GCGTGAGCCACCGCGCCCGGCTTAGGATTGTTTTTCTAATTGTGTAAAGAATGCCATTGGGATTTAGGT
11***11***1111*111111111*****22*2*2*22222*2222*2222***2*22
```

```
left ACGGAGTC---TCGCTCTGTTCGCCAGGCTGG-----ACTCGCTCTGTTCGCCAGGCC
chrom AGGGATTGCATTGACTCTGTAGATCTCTTTGGGTAGTATAAACATTTTAACAATTTAATTCTTCCAATTC
right AGGGATTGCATTGACTCTGTAGATCTCTTTGGGTAGTATAAACATTTTAACAATTTAATTCTTCCAATTC
*2***2*2222*22*****2*22*2222***22222222222222222222222222222222*2222*222*22***222*
```

```
left -----GGACTGCGGACTG-----CAGTGGCG-CAATCTCGGC-----TCACTG-----
chrom AAAAGGGATGTCATTCTATTTATCTGTGCCTTCTTTTCATTTTCATTCATCAATGTCTAA
right AAAAGGGATGTCATTCTATTTATCTGTGCCTTCTTTTCATTTTCATTTTC-----
22222***222*222*222222*2***2*22*22*2222* 111N11
```

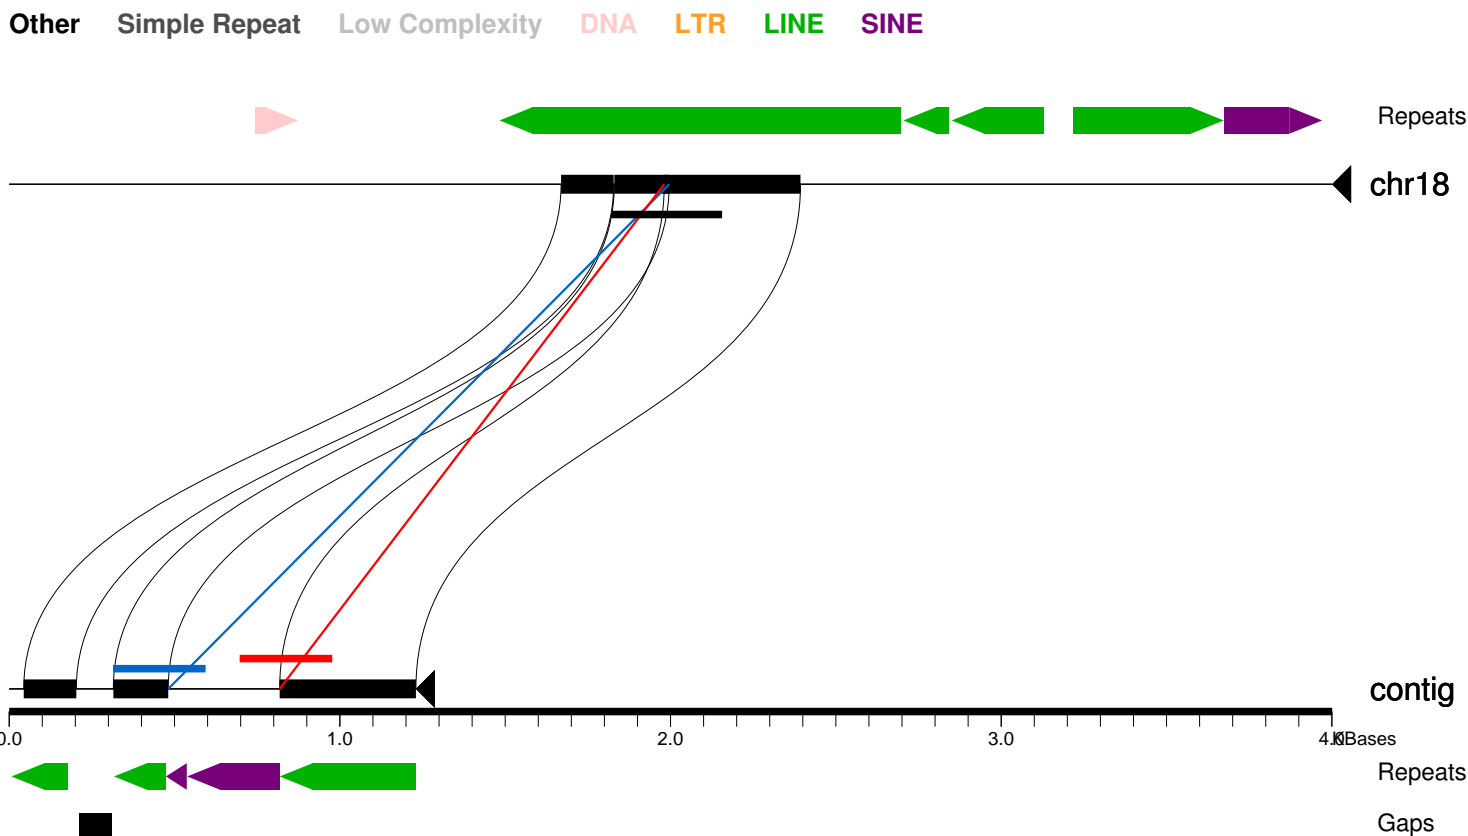

siteID: chr18\_25871810 Scaffitg1 - Breakpoint: chr18:25871819

chr18:25871770-25871875

Overlap Length: 11 INS size: 297 Genotyped: Yes

```
left  A--GTCATTTCTCTT-----TGTGTG---TAGGTTGA-----TAAAAATAACAGCTTATATAATAATC
chrom A--GTCATTTCTCTT-----TGTGTG---TAGGTTGA-----TAAAAATAACAGCTTATATAATAATC
right CCCGCCACTGCACTCCAGCCTGGGCGACAGAGCGAGACTCTGTCTCAAAAAAAAAA-----AAAAAAAATC
      111*1**1*1*1**111111**1*1*1111**111**1111111*1****1**1*1111*1*1**1****
```

```
left  ACATTTTGGCCGGGCGCGGTGGCTCACGCCTGTAATCCCAGCACTTTGGGAGGCCGAGGCGGGCGG
chrom ACATTTTAT-----AATCTT-CAAATTTTCTGTTCAGCTAAATATAGTTAAGAATACAA
right ACATTTTAT-----AATCTT-CAAATTTTCTGTTCAGCTAAATATAGTTAAGAATACAA
      *****2222222222222222**222*222*22**2222**22*2222*22222*2*2222*22
```

Other Simple Repeat Low Complexity DNA LTR LINE SINE

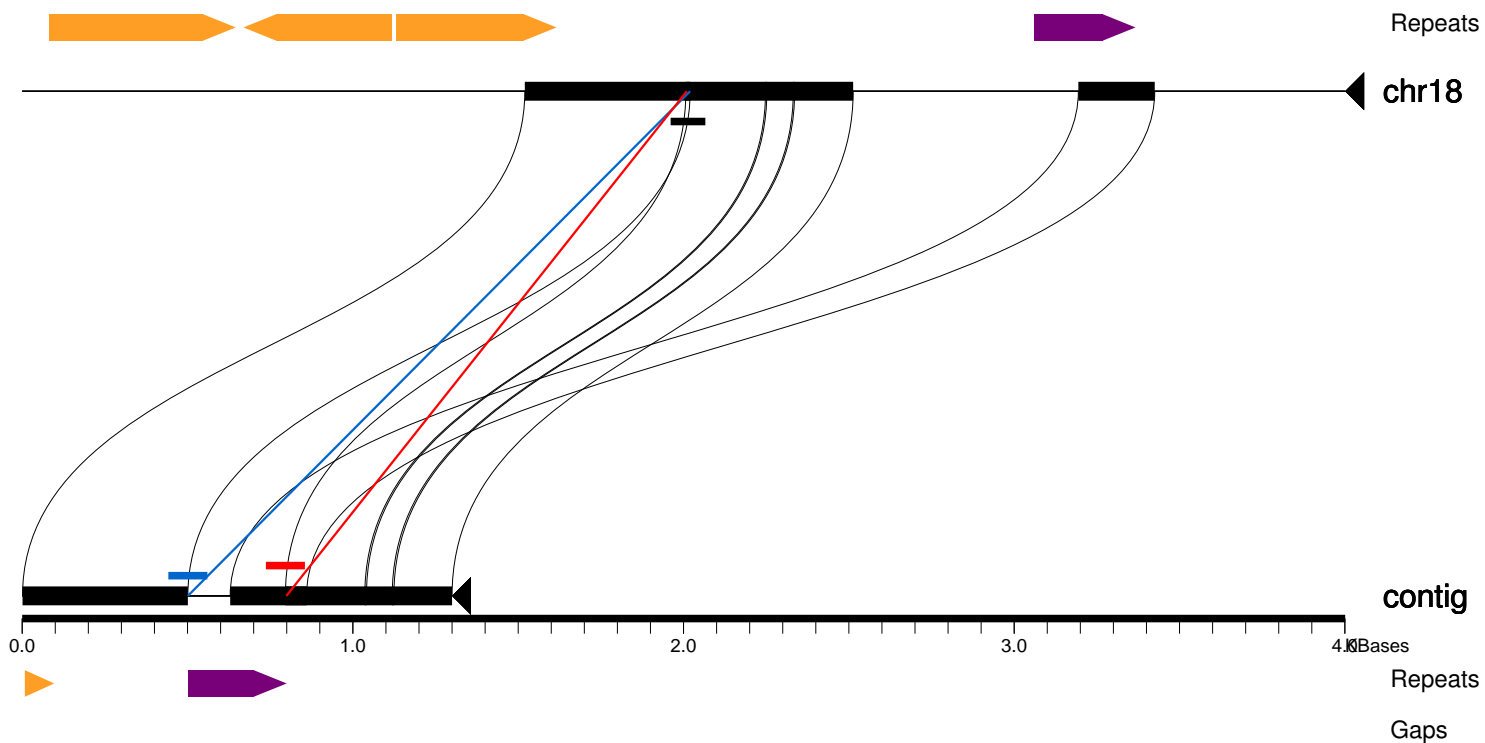

siteID: chr18\_27156352 Scafftig2 + Breakpoint: chr18:27156356

chr18:27156311-27156415

Overlap Length: 15 INS size: 305 Genotyped: Yes

```
left  -----TTTTCAAAAC-CAGTAATAGCACAAAGTCCTCTCAAGCTTTCTATCTCTCTTGTCTC
chrom -----TTTTCAAAAC-CAGTAATAGCACAAAGTCCTCTCAAGCTTTCTATCTCTCTTGTCTC
right CCACCCGCCTCGGCCTCCCAAAGTGCTGGGATTACAGGCGTGAGCCACCGCGCCCGGCC-CTCTTGTCTC
      11111111111111111111*11****111*1*11**11**111**111*1111**111*111*1*****
```

```
left  TTCTTTTTTTTTTTTTTTTTTTTTGAGACGGAGTCTCGCTCTGTGCGCCAGGTCGGACTGCGGACT
chrom TTCTTCCACAATCACATCT-----GTCTGTC-CTACCATTCTGCTTTTCCTTTT--CC
right TTCTTCCACAATCACATCT-----GTCTGTC-CTACCATTCTGCTTTTCCTTTT--CC
      ***222222*2222*2*2222222222****22*2**22*222*2*2*2222**22222*2
```

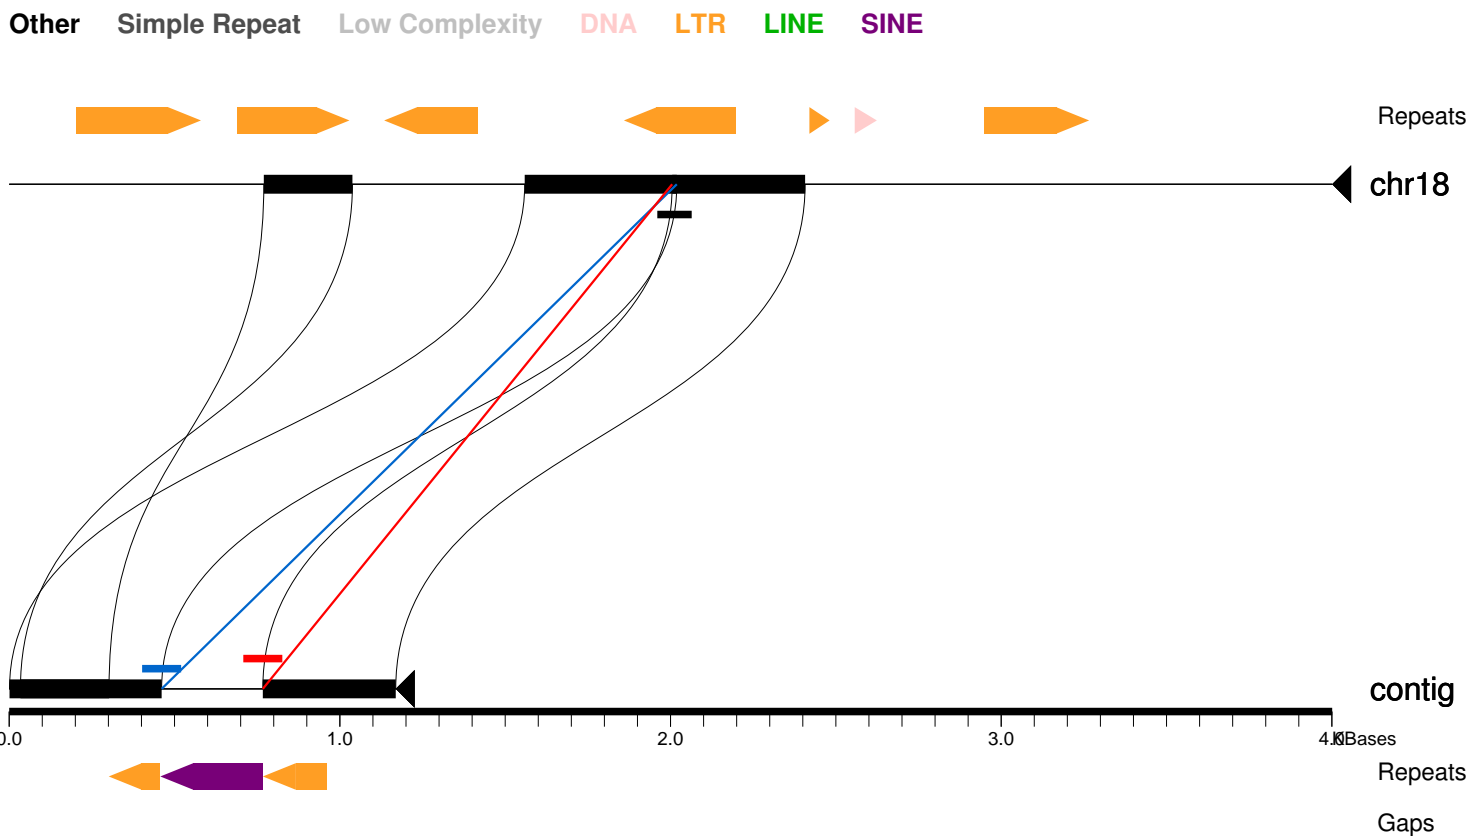



siteID: chr18\_29003599 Scafftig4 - Breakpoint: chr18:29003588

chr18:29003552-29003651

Overlap Length: 34 INS size: 156 Genotyped: Yes

```
left  AT---GTAGAGAACATGAAACT-----AGATAG-----GAATTATTAAAAAAAAAAAAAAAAA
chrom AT---GTAGAGAACATGAAACT-----AGATAG-----GAATTATTAAAAAAAAAAAAAAAAA
right AGTGAGCCGAGATCGCGCCACTGCACTCCAGCCTGGGAGACAGAGCGAGACTCCGTCTCAAAAAAAAAAAAA
*1111*11***1*11*11***1111111111111111***1**11111**1*111*111*****
```

```
left  AAAGAGTAAAAAACAAGTATTTACTACAAAAAATTAGCCGGGCGTGGTAGCGGGCGCCTGTAGTCCCAGC
chrom ---GAGTAAAAAACAAGTATTTACTAGTA----TGTGTCTAGCAC--TAG----GCTAATTGTTTC---
right -----AAAAAACAAGTATTTACTAGTA----TGTGTCTAGCAC--TAG----GCTAATTGTTTC---
2221111*****22*2222*22*2*22**2222***22222**222*2**22*222
```

```
left  TA
chrom --
right --
      22
```

Other Simple Repeat Low Complexity DNA LTR LINE SINE

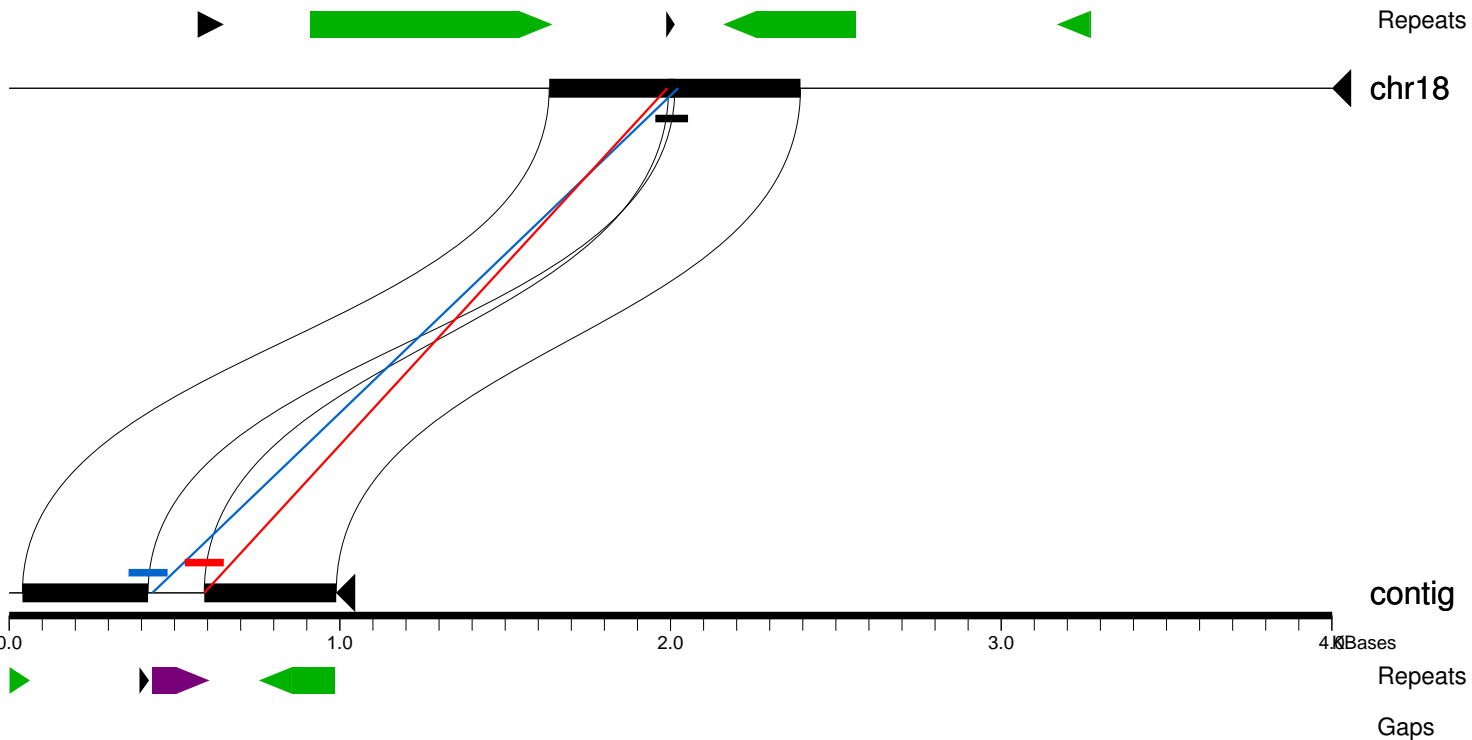



siteID: chr18\_29398919 Scafftig1 - Breakpoint: chr18:29398920

chr18:29398865-29398966

Overlap Length: 5 INS size: 311 Genotyped: Yes

```
left -----GATATCGATTTTGAAATTTAAAG-----GTACCAGAATATGCCCCACAAAAAATATA---C
chrom -----GATATCGATTTTGAAATTTAAAG-----GTACCAGAATATGCCCCACAAAAAATATA---C
right CCACTGCACTCCAGCCTGGGCGACAGAGCGAGACTCCGTCTCAAAAAAAAAAAAAAAAAAAAAAAAAAACC
11111*111*1*111**111111*1**111111111**11**1**1*111111*1*****1*1*111*
```

```
left CACTTTGGCCGGGCGCGGTGGCTCACGCCTGTAATCCCAGCACTTTGGGAGGCCGAGGCGGGCGGA
chrom CACTTTGACAAGAATTATT--TTGA-----GTTATAG--GCAACT---GAGAACCAGGAG-----A
right CCTTTGACAAGAATTATT--TTGA-----GTTATAG--GCAACT---GAGAACCAGGAG-----A
*1***2*22*222222*222*2*22222**2**2222***22*222***22*2***2*22222*
```

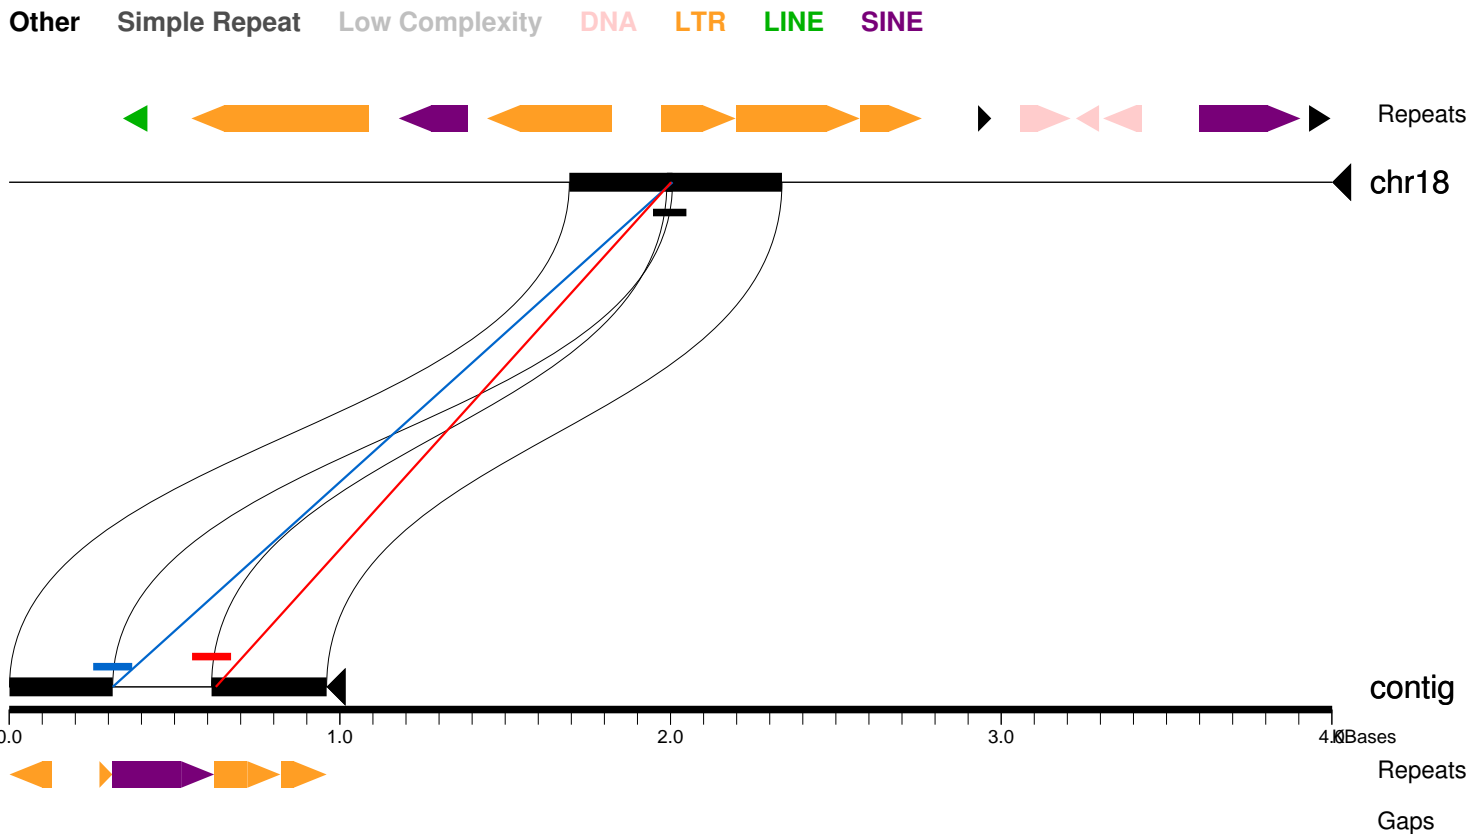

siteID: chr18\_30047878 Scaffitg3 - Breakpoint: chr18:30047887

chr18:30047842-30047946

Overlap Length: 15 INS size: 299 Genotyped: Yes

```

left  TAC--CAGCATGTCCTCAAC--CTGTCCTAAACTGTGTG-----AAACATGTTTAAAAACATGCA
chrom TAC--CAGCATGTCCTCAAC--CTGTCCTAAACTGTGTG-----AAACATGTTTAAAAACATGCA
right CACTGCACTCCAGCCTGGGCGACAGAGCGAGACTCCGTCTCAAAAAAAAAAAAAAAAAAAAAA
1**11**111111***111*11*1*11*1*1***11**111111111111***1*11111*****

```

```

left  AAGAGGCCGGGCGCGGTGGCTCACGCCTGTAA--TCCCAGCACTTTGGGAGGCCGAGCGGGCGG
chrom AAGATCTA-----TGATTGACTCTTTTAAAGTCTACCCAAATT-----AAACTGCTAT
right AAGAATCTA-----TGATTGACTCTTTTAAAGTCTACCCAAATT-----AAACTGCTAT
***22*222222222**22*2**2*2*2***22**2222**22**222222222*22*2*2222

```

Other    Simple Repeat    Low Complexity    DNA    LTR    LINE    SINE

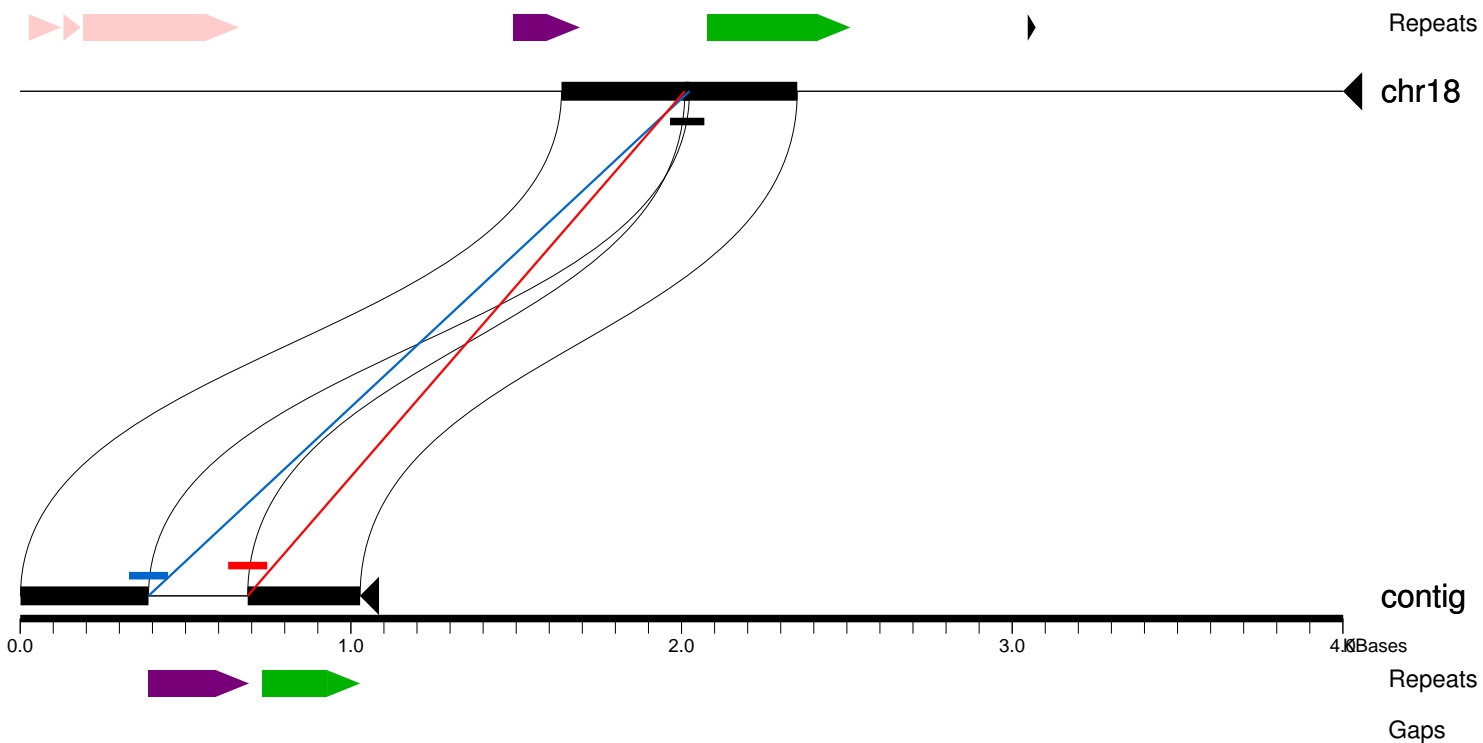



siteID: chr18\_36512550 Scafftig7 - Breakpoint: chr18:36512533

chr18:36512487-36512592

Overlap Length: 14 INS size: 304 Genotyped: Yes

```
left  -----ATTATAAGTGATTGTTCAACTATTTACCTCAGTTTCAAGAAATCTC-----AAAAGCAAATT
chrom -----ATTATAAGTGATTGTTCAACTATTTACCTCAGTTTCAAGAAATCTC-----AAAAGCAAATT
right  CACTCCAGCCTGGGCGACAGAGCGAGACTCCGTCTCAAAAAAAAAAAAAAAAAAAAAAAAAAAAAAAA AAAAGCAAATT
      111111*111*11*1**11*11*1*111*1211****11111**1***111111111111*****
```

```
left  TGAGGCCGGGCGCGGTGGCTCACGCCTGTAATCCCAGCACTTTGGGAGGCCGAGGCGGGCGG
chrom TGAAAC---TCAAG-----TCATGGCAACTAGATAGACAAGTTTTAATTCATATTTT-----
right TGAAAC---TCAAG-----TCATGGCAACTAGATAGACAAGTTTTAATTCATATTTT-----
      **22*2222*22*22222***2*2*2222*222222**22**222*22*22*22222222
```

Other Simple Repeat Low Complexity DNA LTR LINE SINE

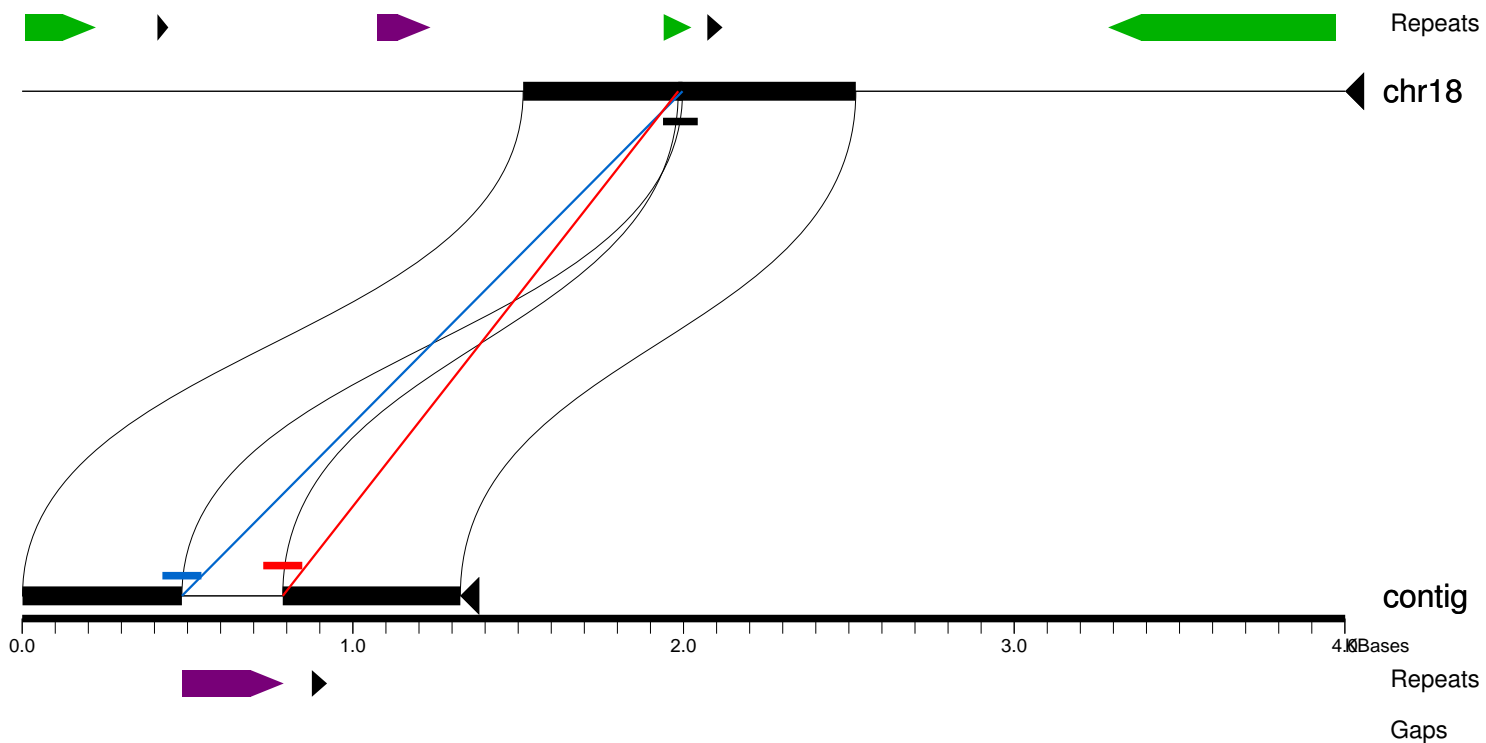

siteID: chr18\_4355875 Scaffoldig1 + Breakpoint: chr18:4355868

chr18:4355822-4355927

Overlap Length: 14 INS size: 294 Genotyped: Yes

```
left   TTC--TCTTGAGTCTCCCATAGACTAGCTAGCTGCTGC-TCTC----TGCT-----TCC--TCTTCTGCTT
chrom  TTC--TCTTGAGTCTCCCATAGACTAGCTAGCTGCTGC-TCTC----TGCT-----TCC--TCTTCTGCTT
right  CTCGATCTCCTGAC-CTCATGATCCACCCGCCTCGGCCTCCCAAAGTGCTGGGATTACAGTCTTCTGCTT
      1**11***111*1*1*1***11*11**11**11*1**1**1*1111****11111*1*11*****

left   TTTTFFFFFFFFFFFFFFFFFFFFFFFFFFFFFFFFGGAGACGGAGTCTCGCTCTGTGCGCCAGGCCG
chrom  TTTTAAATAGAAAACCTTCTCAAAAATTTATCT-----ACT---TGTTGC-CTTTA----ATACCT
right  TTTTAAATAGAAAACCTTCTCAAAAATTTATCT-----ACT---TGTTGC-CTTTA----ATACCT
      ***22*2222222**2*22222***2*2*22222**2222*2*2**2**2*22222*22**2
```

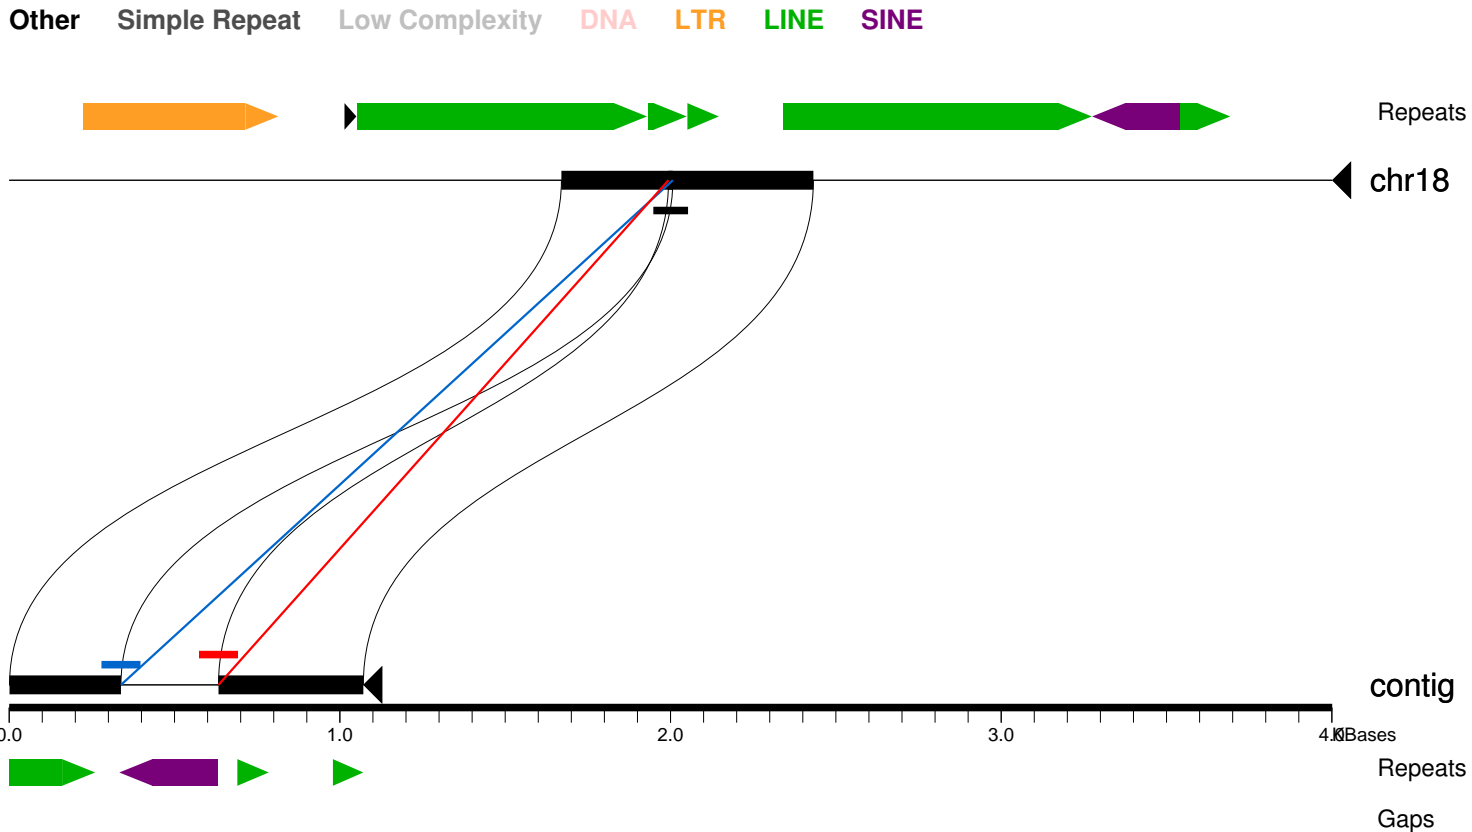

siteID: chr18\_44641860 Scafftig4 + Breakpoint: chr18:44641881

chr18:44641835-44641940

Overlap Length: 14 INS size: 351 Genotyped: No

```

left   CTTATTAAGTTTAAATGACTTGGCTGCTCTTCTAATGAATTCACAAAG-----AACTGCTGGGA
chrom  CTTATTAAGTTTAAATGACTTGGCTGCTCTTCTAATGAATTCACAAAG-----AACTGCTGGGA
right  NNNNNNNNNNNNNNNNNNNNNNNNNNNNNNNNNNNNNNNNNNNNNNNNNNNNNNNNNNNNNNNNNNNNN
      111111111111111111111111111111111111111111111111111111111111111111
      *****
  
```

```

left   ATGGCCGGGCGCGGTGGCTCACGCCTGTAATCCAGCACTTTGGGAGGCCGAGGCGGGCGG
chrom  ATT-----ACACTCAGATACAC-----TAAAGAAAG--GTGATAGATTATTAAATTTGGGA
right  ATT-----ACACTCAGATACAC-----TAAAGAAAG--GTGATAGATTATTAAATTTGGGA
      **2222222*2*222*222***22222***2222*222*2222*22222*22222*2*2
  
```

Other   Simple Repeat   Low Complexity   DNA   LTR   LINE   SINE

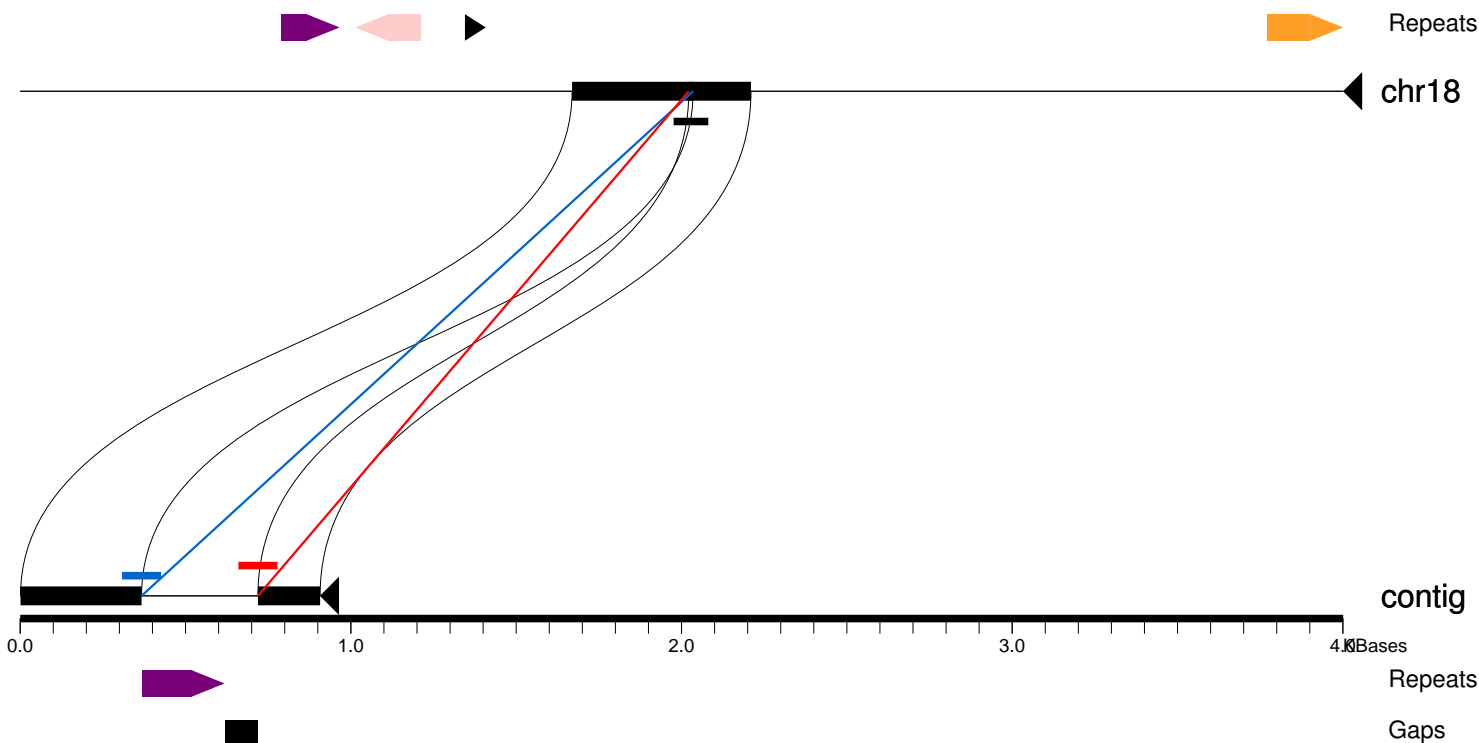



siteID: chr18\_46523831 Scaffitg3 + Breakpoint: chr18:46523840

chr18:46523680-46524006

Overlap Length: 7 INS size: 108 Genotyped: Yes

```

left      T-----TCACCTCCCAGGCACGTTTTTCAAAACTAATCATAGGTCAATTCCCCTTCTTGCCAGCTCCAGGG
chrom    TGTCTTTACCTCCCAGGCACGTTTTTCAAAACTAATCATAGGTCAATTCCCCTTCTTGCCAGCTCCAGGG
right    AGAAA-----AGGGACG-----AAGCGGAG-----CTTGC-----AGTG
        12NNN  1111111111***1***1111111111111***1*11**11111111111111111111***1***1*

```

```

left      ACCTGCAGAGATGGGAGGCGCTGCTGAAAAACCTCTAA---GGGGGGCAGCGCCGCCTTACCTCTCAGAG
chrom    ACCTGCAGAGATGGGAGGCGCTGCTGAAAAACCTCTAA---GGGGGGCAGCGCCGCCTTACCTCTCAGAG
right    A---GCCGAGATTGC-GCCACTGCAGTCCGCAGTCCGACCTGGGCGACAGAGCGAGACTCCATCTCAAAA
        *111**1*****1*11*1*1*****1*1111*11**11*111***1*1***1**11111*1*1*****1*1

```

```

left      CTGCATTTCCCTCTCTTAGAAAA---GGGACGAA---GCGGAGCTTGCAGTGAGCCGAGATTGCGCCAC
chrom    CTGCATTTCCCTCTCTTAGAAAA---GGGACGAA---GCGGAGCTTGCAGTGAGCCGAGATTGCGCCAC
right    AAAAAAAAAAAAAAAAAAAAAAAAAAAAAAGGGACGAGCTAGGTGGATTTTAAAGTTC-CTGCCAGTTC-CCAA
        1111*1111111111111111*1*****1111*****22222*2***22*22***222*2*22*2*2*2*2***2

```

```

left      TGCAGTCCGCAGTCCG-----ACCTGGGCGA-----CAGAGC-----GAGACT-CCATCTCAAA
chrom    TTATTTACCCAGAAGCTGATTTTAACTGAGTGTGTTGACCAAAGCTTTGGTCCATGAGCCTTCCATTGCCGG
right    TTATTTACCCAGAAGCTGATTTTAACTGAGTGTGTTGACCAAAGCTTTGGTCCATGAGCCTTCCATTGCCGG
        *2222*2*2***22*2222222*2***2*2*222222*2***2222222222***2*2***22*222

```

```

left      A-----AAAAAAAAAAAAAAAAAAAAAAAAAAGGGACGAGCTA-----
chrom    GGTGTTTTATTTTACATAAAATTTATCTGGATACTCACACGTAGAAGTTTTTCTTTT
right    GGTGTTTTATTTTACATAAAATTTATCTGGATACTCACACGTAGAAGTT-----
        222222222222*2*2***222*22222*2*222*2*2*2*2*22*2*N

```

Other Simple Repeat Low Complexity DNA LTR LINE SINE

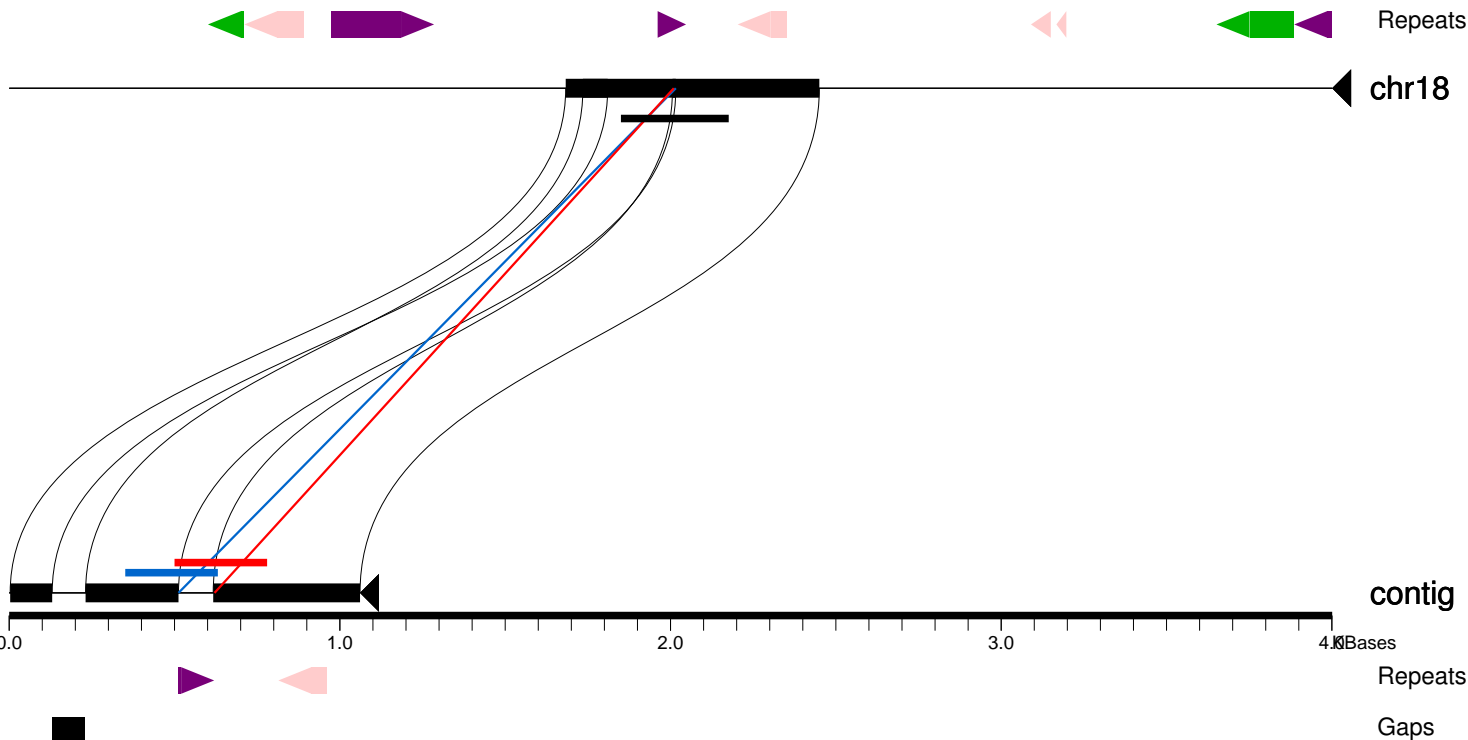



siteID: chr18\_49795421 Scafftig7 - Breakpoint: chr18:49795408

chr18:49795355-49795467

Overlap Length: 7 INS size: 288 Genotyped: Yes

```
left  CATGAGATAAAGTTAG-----CAGTGCTGTTATTA---TTCACAATGTCATAGCTCCTTAGAACTTGTGG
chrom CATGAGATAAAGTTAG-----CAGTGCTGTTATTA---TTCACAATGTCATAGCTCCTTAGAACTTGTGG
right C-TGCACTCCAGCCTGGGCGACAGAGC-GAGACTCCGTCTCAAAAAAAAAAAAAAAAAAAAAAAAAAAACTTGTGTT
      *1**111*11**111*11111***1**1*11*1*11111***1**1111*1*1111111*1*1*****22
```

```
left  CTCACGCCTGTAATCCCAGCACTTTGGGAGGCCGAGGCGGGCGGATCACGAGGTCAG
chrom TATTGAAACAAAATACATGTTCTTATTTTG--CATTTTC---CCTACTACCAT-TCAC
right TATTGAAACAAAATACATGTTCTTATTTTG--CATTTTC---CCTACTACCAT-TCAC
      22222222222***2*22*22***22222*22*2222*222*22*22**2*22***2
```

Other Simple Repeat Low Complexity DNA LTR LINE SINE

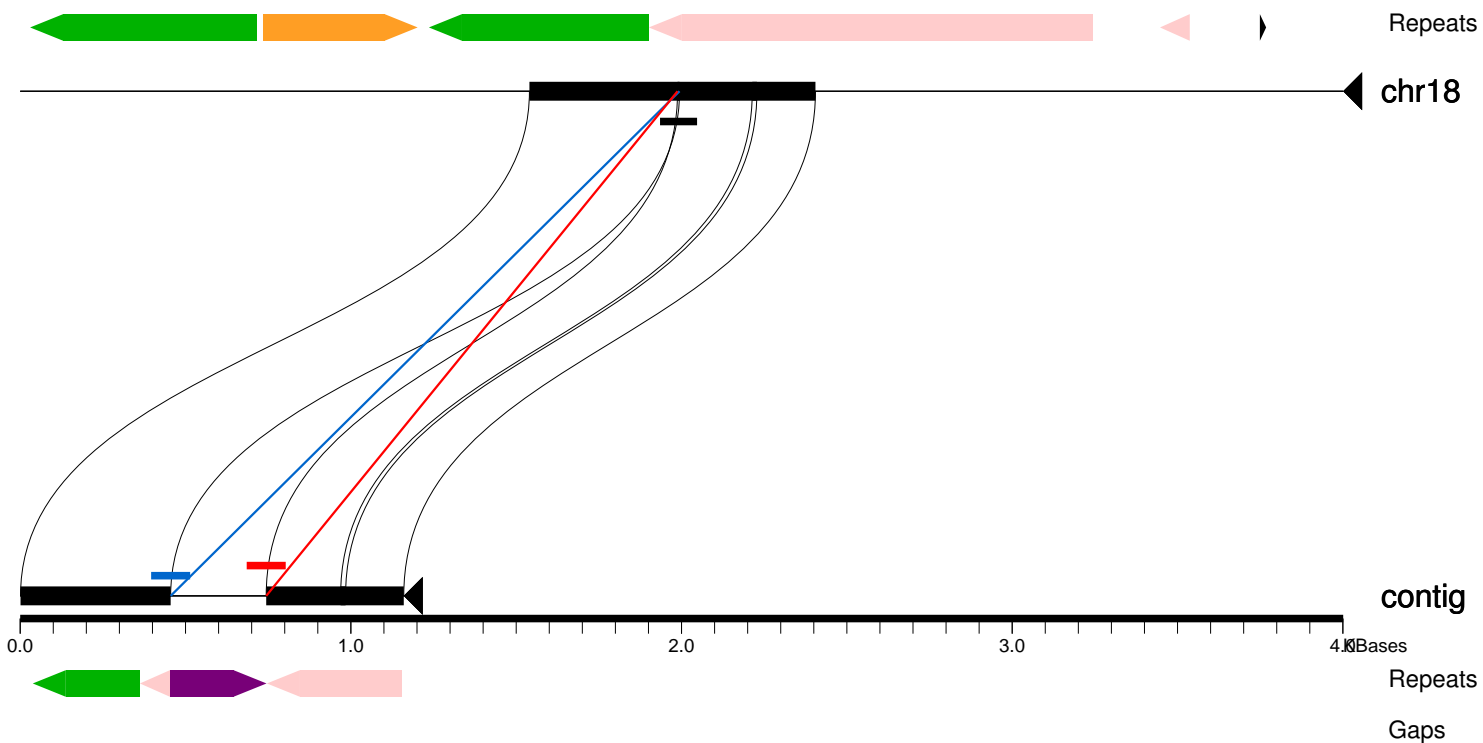





siteID: chr18\_53146062 Scafftig1 - Breakpoint: chr18:53146062

chr18:53146016-53146121

Overlap Length: 14 INS size: 322 Genotyped: Yes

```
left AAC-----CAGAGAAAGTCCACAGTTCTGTGGCATAAGGAGATTTAAACTG-----CAACAAACAGT
chrom AAC-----CAGAGAAAGTCCACAGTTCTGTGGCATAAGGAGATTTAAACTG-----CAACAAACAGT
right TCCGCCCGCCTCGGCCTCCCAAAGTGCTGGGATTACAGGCGTGAGCCACCGCGCCCGGC-----CAACAAACAGT
      11*111111*111*111111***1***1***1*111111***1*111111**1*111111111*****
```

  

```
left TTTTTTTTTTTTTTTTTTTTTTTTTTTTTTTTTTTTTTTTTTTTTTTTTTTTTTTTTGAGACGGAGTCTCGCTC
chrom TTTAAAAATTAATAATGTTCAAACCTTTAAGGTGAAAAATTATAAATGTTAA-----
right TTTAAAAATTAATAATGTTCAAACCTTTAAGGTGAAAAATTATAAATGTTAA-----
      **2222**22222*2**22222***2222*22222**2*222*2222*222222222222222
```

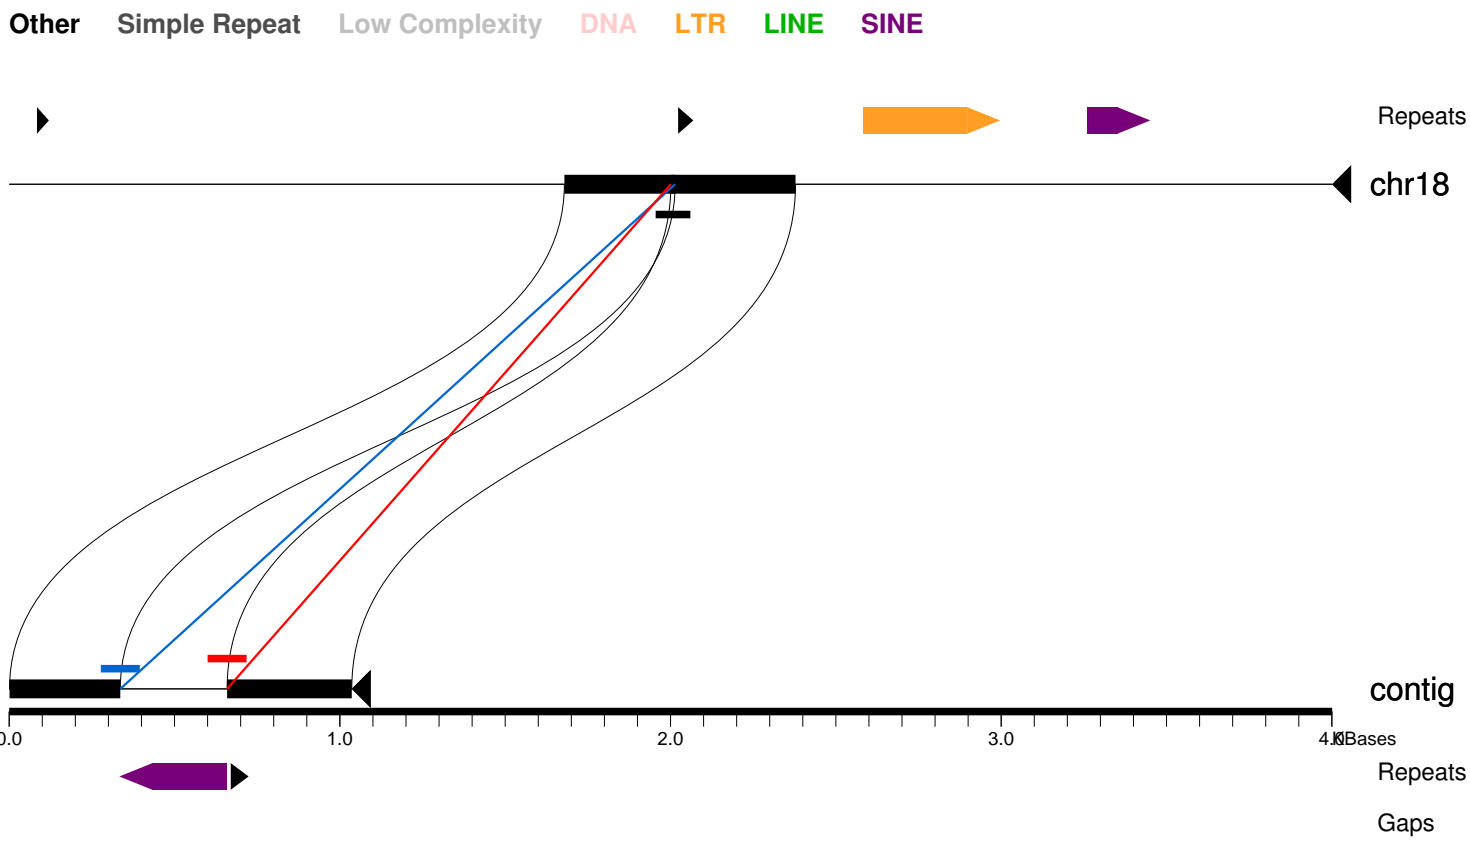

siteID: chr18\_5411684 Scaffitg1 + Breakpoint: chr18:5411652

chr18:5411606-5411711

Overlap Length: 14 INS size: 296 Genotyped: Yes

```
left  ACA-----GATATC---AACTAAT--CATTAATAAAGTTCCCTTGATCAAATATCTGTGATTAATAT
chrom ACA-----GATATC---AACTAAT--CATTAATAAAGTTCCCTTGATCAAATATCTGTGATTAATAT
right CCGCCCGCCTCGGCCTCCCAAAGTGCTGGGATTACAGGCGTGAGCCACCGCGCCCGGCCGTGATTAATAT
      1*1111111111*111**111**1*11*111****11111*111*11111*111111*1*****

left  TTTTTTTTTTTTTTTTTTTGAGACGGAGTCTCGCTCTGTTCGCCAGGCTGGAGTGCAGTGGCG
chrom TTTGAAAACAAAAA---TGAAAATGGGAGGCGA-----GTCTATGATGG--TGAATCTG--
right TTTGAAAACAAAAA---TGAAAATGGGAGGCGA-----GTCTATGATGG--TGAATCTG--
      **2222222222222222***2*22*2*222**2222222*2*2*2*2***22**2*222*22
```

Other Simple Repeat Low Complexity DNA LTR LINE SINE

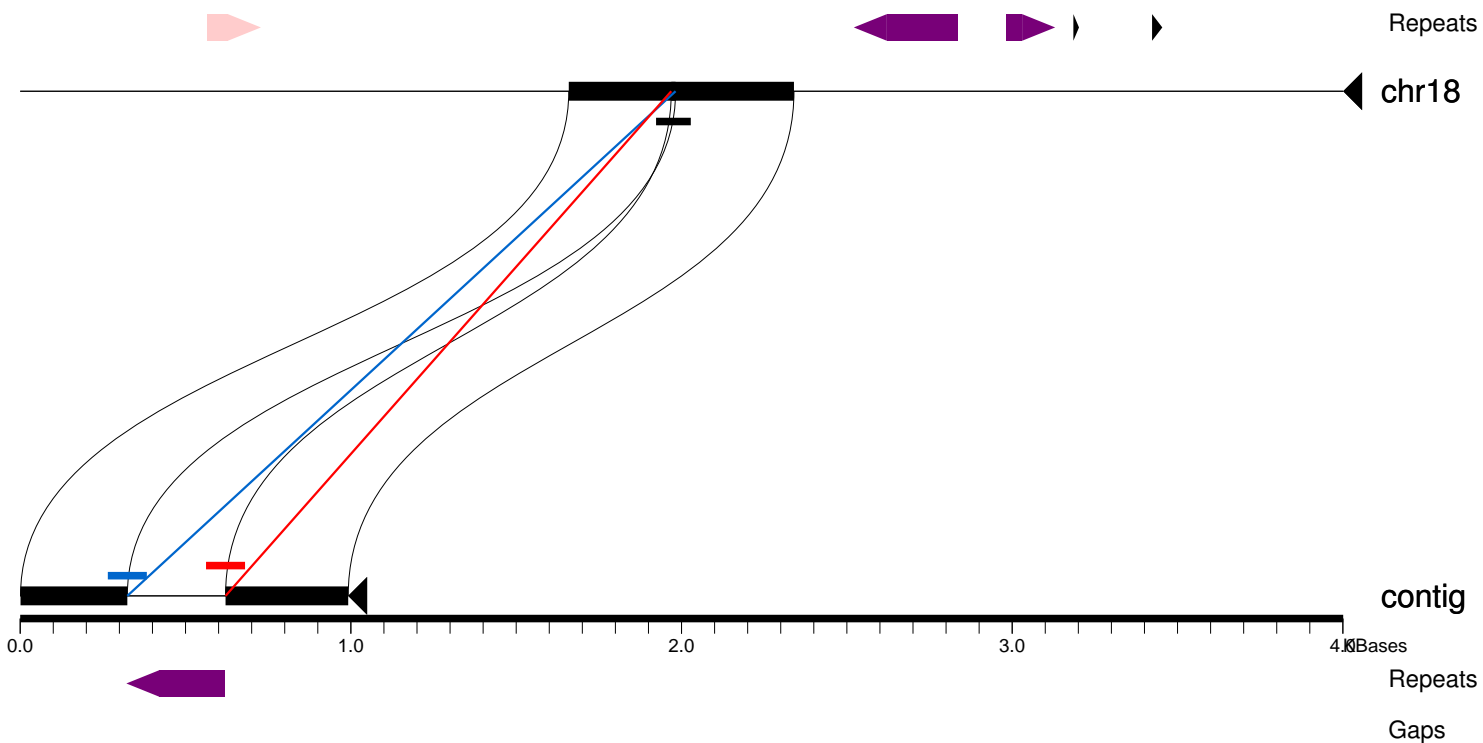





siteID: chr18\_57372774 Scaffig11 + Breakpoint: chr18:57372759

chr18:57372712-57372818

Overlap Length: 13 INS size: 302 Genotyped: Yes

```
left  -----GACTA---CTCACAGAGAGC-----ATTTCTGCAATCA--CCACAAGGAAATACCTAGGCAAAATG
chrom -----GACTA---CTCACAGAGAGC-----ATTTCTGCAATCA--CCACAAGGAAATACCTAGGCAAAATG
right CCGCCCGCCTCGGCCTCCCAAAGTGCTGGGATTACAGGCGTGAGCCACCGCGCCCGTCC--GGCAAAATG
      1111111*1**1111***1**1**1**1111***1*1*111*1*1****111*111111**11*****
```

```
left  TTTTFFFFFFFFFFFFFFFFFFFFFFFFGGAGACGGAGTCTCGCTCTGTGCGCCAGGCTGGAGTGCA
chrom TTTTAAAAAATTTCAGAGTA-----CAG-CATAGTC---CTGTGGAACCTACTTCTAATTG--
right TTTTAAAAAATTTCAGAGTA-----CAG-CATAGTC---CTGTGGAACCTACTTCTAATTG--
      ***222222**22222*22222222**2*22****222**2**222**2*222222*2**22
```

Other Simple Repeat Low Complexity DNA LTR LINE SINE

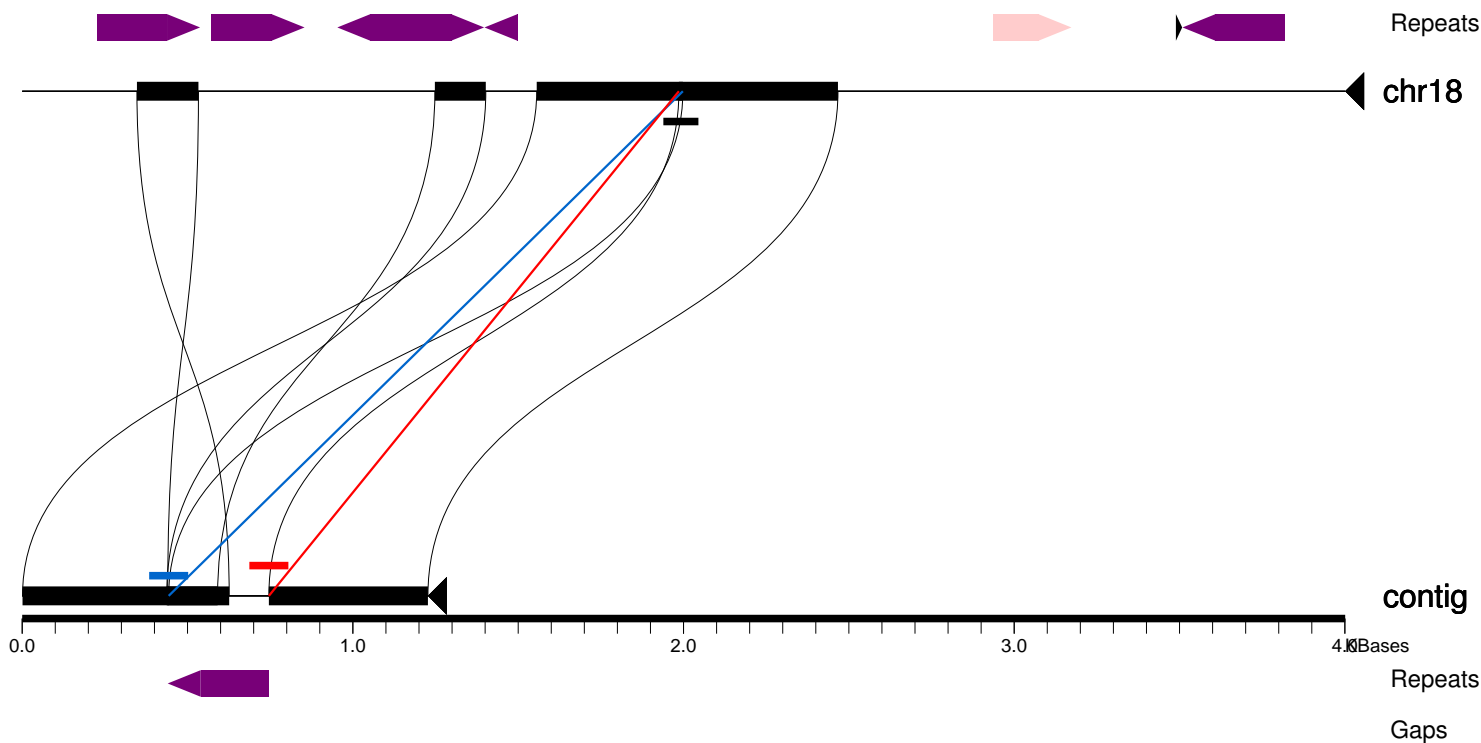







siteID: chr18\_58775004 Scafftig4 - Breakpoint: chr18:58774981

chr18:58774937-58775040

Overlap Length: 16 INS size: 322 Genotyped: Yes

```
left  -----AATGAATATAATATTTGATAATAAAAAGCCA-----ACAAATATTTTCATTTAAAAAGACAAC
chrom -----AATGAATATAATATTTGATAATAAAAAGCCA-----ACAAATATTTTCATTTAAAAAGACAAC
right GGCGACAGAGCGAGACTCCGTCTCAAAAAAACACACACACACAAAAA*****AAAAAGACAAC
      111111111*11*111*11111*1*1**1**1*11**1111111*1***1*1111*111*****

left  TATAGGCCGGGCGCGGTGGCTCACGCCTGTAATCCCAGCACTTTGGGAGGCCGAGGCGGGTGA
chrom TATAGATTAACCTCA----CTTACG-----AATATTAACATTAATAAATCCT-----GAGTA
right TATAGATTAACCTCA----CTTACG-----AATATTAACATTAATAAATCCT-----GAGTA
      ***222222*2*22222**2***22222***222*2**2*22222*22**2222222*2*2*
```

Other Simple Repeat Low Complexity DNA LTR LINE SINE

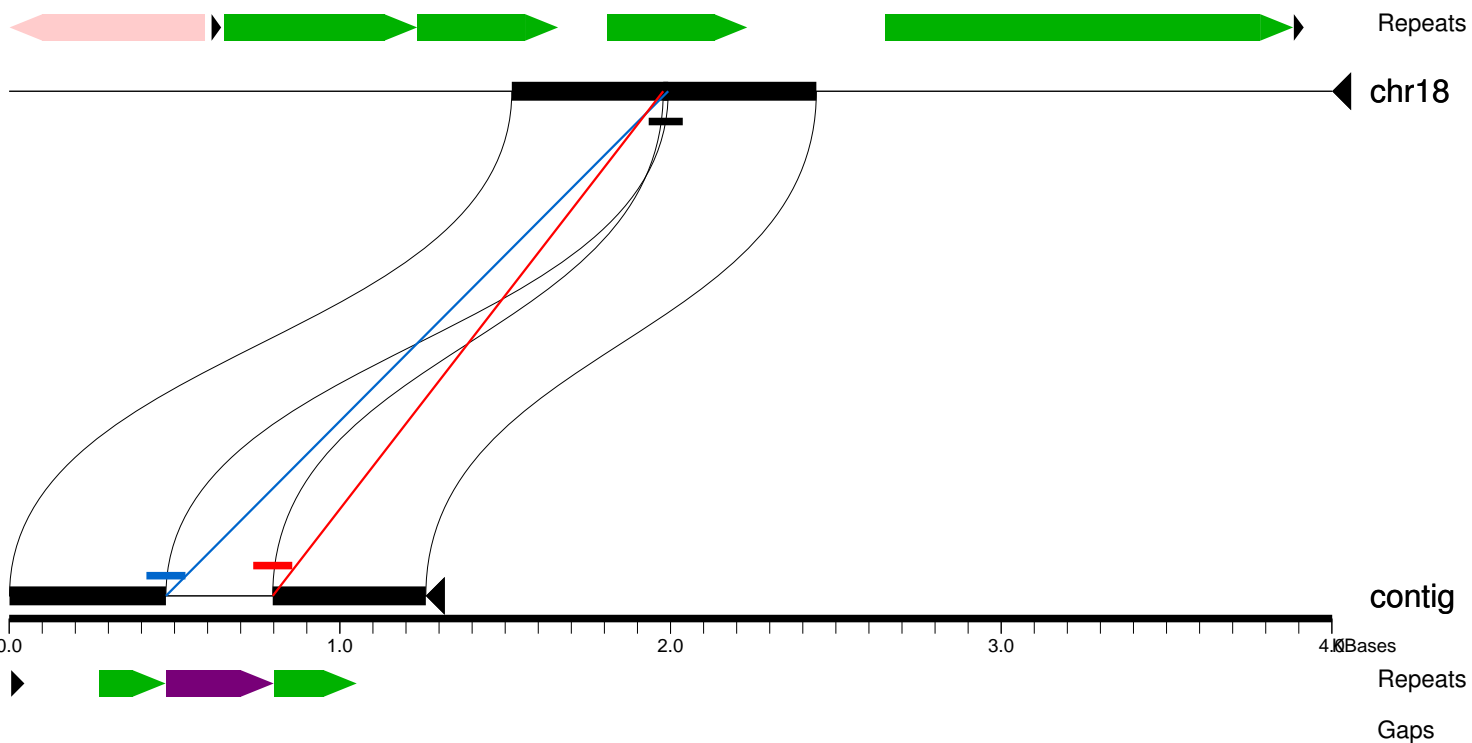

siteID: chr18\_59713719 Scafftig8 + Breakpoint: chr18:59713720

chr18:59713675-59713779

Overlap Length: 15 INS size: 298 Genotyped: Yes

```
left  AGAGGAGCA-CGAAC-CCTGTCGTGAACTGTGCTTGCAAGGG--ATCTA-----GGTTGTGCA
chrom AGAGGAGCA-CGAAC-CCTGTCGTGAACTGTGCTTGCAAGGG--ATCTA-----GGTTGTGCA
right CCGCCCGCCTCGGCCTCCCAAAGTG--CTGGGATTACAGGCGTCAGCCACCGCGCCCGGCCGGTTGTGCA
      1111111**11**11*1**1111***11***1*1**1*1*11*1*1*1111111111111*****
```

```
left  CTTCTTTTTTTTTTTTTTTTTTTTTTTGAGACGGAGTCTCGCTCTGTCGCCAGGCTGGAGTGCAGTGG-
chrom CTTCTTATGAGAAT-----CTAACGAATGCCTGATGATCTG-----AGG-TGGAA--CAGTTTC
right CTTCTTATGAGAAT-----CTAACGAATGCCTGATGATCTG-----AGG-TGGAA--CAGTTTC
      *****2*22222*2222222*222**22*22*222*2*****222222***2***222***222
```

Other Simple Repeat Low Complexity DNA LTR LINE SINE

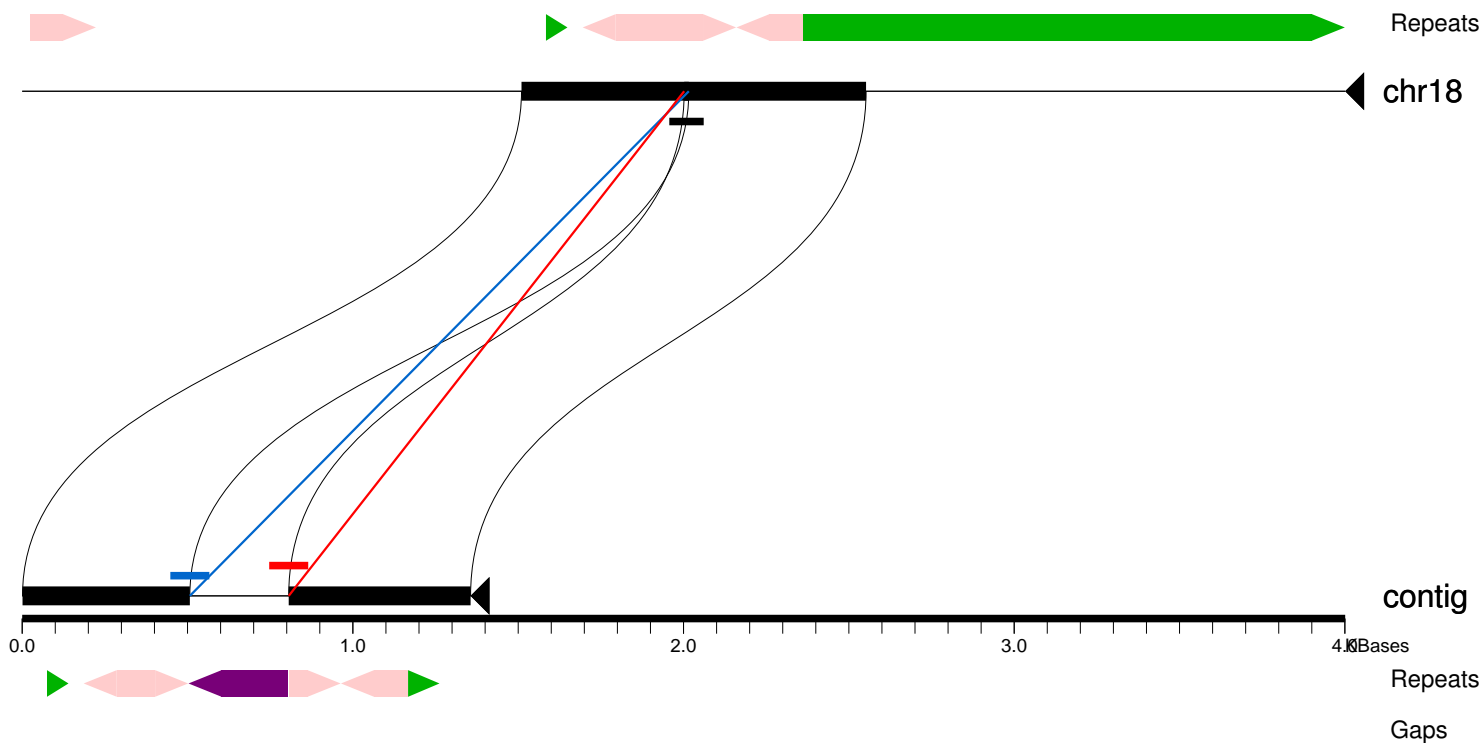



siteID: chr18\_62566665 Scafftig1 - Breakpoint: chr18:62566673

chr18:62566513-62566847

Overlap Length: 15 INS size: 309 Genotyped: Yes

```
left -----TTATAAAATGTTACTTGTTCATTTAATATTTTTTATTTTACTGCTATTTAATTAAT
chrom CTAAAAATGTAACCTTCTTATAAAATGTTACTTGTTCATTTAATATTTTTTATTTTACTGCTATTTAATTAAT
right ATGGCGTGAAACCCGGGAGGCGGAGCTTGCA-GTGAGCTGAGATCGCGCC----ACTGCAGTCCGC--AGT
N2NNNN22N2N2NNN1111111*11**1*11**1*11**1*11**1*11**1111111111*****11*111111*1*
```

```
left GTGAAAATGACAAATAAGAAAAAGAGATCATTTCTTTGATGTATCATTTTTTCTACAATCTCAATTATGTAG
chrom GTGAAAATGACAAATAAGAAAAAGAGATCATTTCTTTGATGTATCATTTTTTCTACAATCTCAATTATGTAG
right CCGGCCTGGGC-----GACAGAGCGA-----GA-----CTCCG-TCTCAAAAAAAAAA
11*111111*1*1111111**1*1**1**1111111111**1111111111111**1*11*****11*111*1
```

```
left TTAGAGTCTTGTTCATGATAAAAAAGTCTTTTCTT-----GGCCGG-----
chrom TTAGAGTCTTGTTCATGATAAAAAAGTCTTTTCTTAAAAATAAGTTTTTTTTTAAGTCTTTTTTTTTAAAAAAT
right AAAAAA-----AAAAA*AAAAAGTTTTTTCTTAAAAATAAGTTTTTTTTTAAGTCTTTTTTTTTAAAAAAT
11*1*11111111111*11*1*1*****1*****2222222222222222*2**2222222222222222
```

```
left ----GCG---CGGTGGCTCACGCCCTGTAATCC---CAGCACTTTGGGAGGCCGAGGCGGGTGGATCATGA
chrom TTTTGCCTTTTCGGACAGTTGCTTCTGCAATTCTCACAGCCCTTATAATTTCCATCTTTTCACTTTCTTTTC
right TTTTGCCTTTTCGGACAGTTGCTTCTGCAATTCTCACAGCCCTTATAATTTCCATCTTTTCACTTTCTTTTC
2222**2222***2222*22*22***2***2*222*2***2***2222222*2222222222222*2*22
```

```
left GGTCAGGAGATCGAGACCATCTGGCTAACA-----AGGTGAAACCCCGTCTCTACTAAA
chrom ATTCAAGTGAGAAAAATCCGTCAAGGTGATCAGAAAAAATGTCAAACATGGTC-----AGA
right ATTCAAGTGAGAAAAATCCGTCAAGGTGATCAGAAAAAATGTCAA-----
22**2*2**22*22**2**22**22*2**22222*2**2***1NNN1112222221N1
```

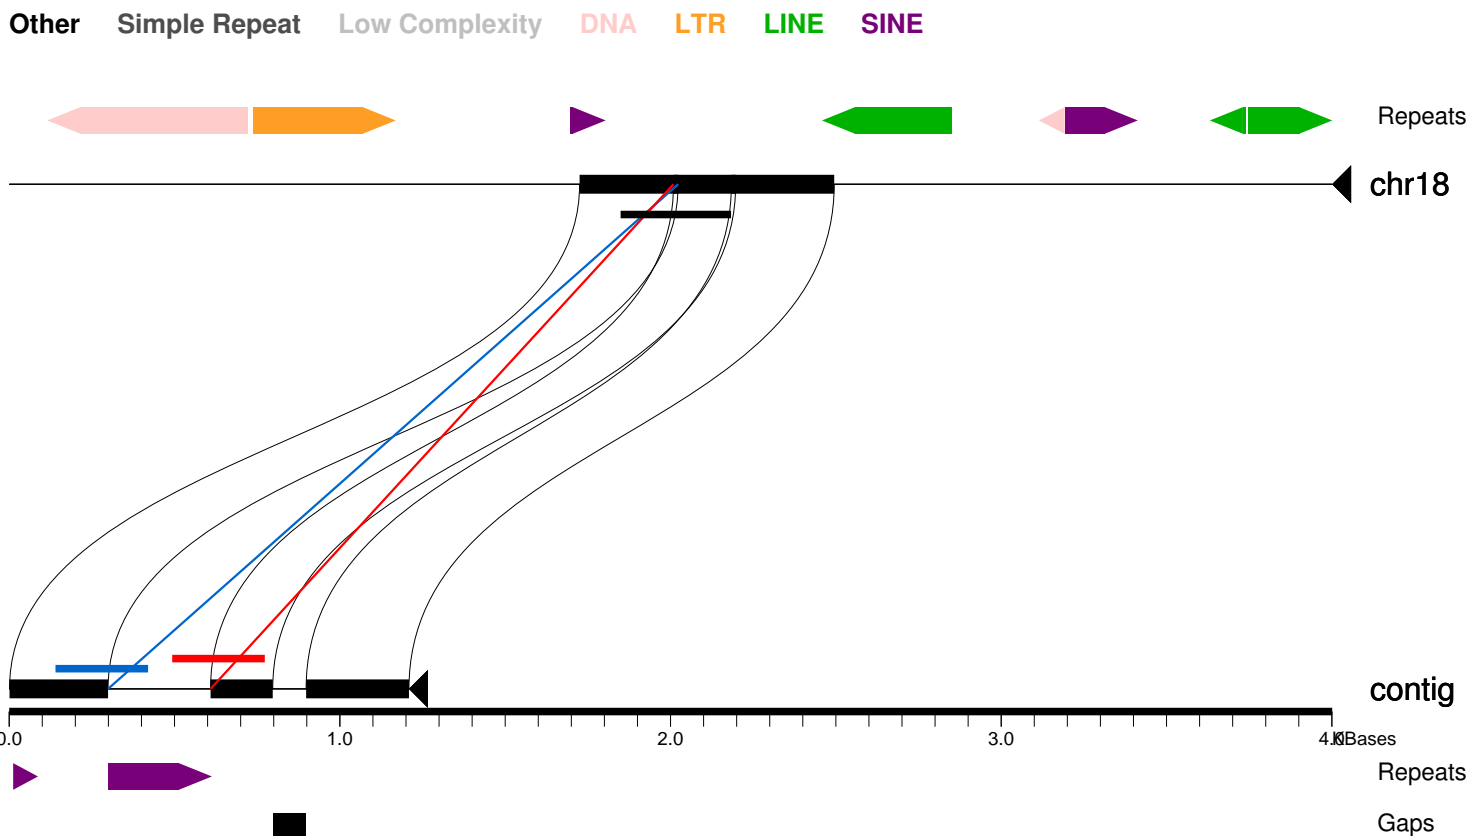







siteID: chr18\_63661983 Scafftig1 - Breakpoint: chr18:63661987

chr18:63661827-63662169

Overlap Length: 23 INS size: 455 Genotyped: No

```
left -----  
chrom TGACATAATTTACATTTCTATCCACAGCATATAAGGAGTCCCTTTCTCAACACTCTCGCTGACTACATAT  
right TT---TAGTAGAGACGGGGTTTCAC--CTTGTTAGCCAGGATGGTCTCGA---TCTC-CTGACCTCATGA  
2N 2N2NN2N2NNNNNN2N222 2N2N2N22NNNNNNNNN2222N2 2222 22222NN222NN
```

```
left -----CCATTCTAATAGATGTGATGTGATATTTTCATGGTGGTTATGATTTG  
chrom TATCTCTTGTCTTTTTGATAACAGCCATTCTAATAGATGTGATGTGATATTTTCATGGTGGTTATGATTTG  
right TC-CACCCGCCT-----CGGCTCCCAA-----GTGCTGGGAT--TACA-GGCG----TGAGCCA  
2N 2N2NN2N22 2N2**111*1**11111***1**1***11*1**1**1*1111***1111
```

```
left TATTTTCTGATGATTGATAAAGTTGAGCATTTTTTAAACATANNNNNNNNNNN-----  
chrom TATTTTCTGATGATTGATAAAGTTGAGCATTTTTTAAACATACCTGTTGGTCATTTTTATGACATCTTT  
right -----CCGC-GCCCGGCCAAGTTGAGCATTTTTTAAACATACCTGTTGGTCATTTTTATGACATCTTT  
1111111*1*11*111*111******2222222222222222222222222222
```

```
left -----  
chrom GGAAATATGTCTATTCAGATCTTTGCCCATTTTTGAATGTTTCTTTGCTTGTTTTTCCTTTTTGCTATTG  
right GGAAATATGTCTATTCAGATCTTTGCCCATTTTTGAATGTTTCTTTGCTTGTTTTTCCTTTTTGCTATTG  
22222222222222222222222222222222222222222222222222222222222222222222
```

```
left -----  
chrom AGTTGTGTGAGTTCCTTATATATTTTTGTATTTAGTCCCTTGATTAATGAGATATTTGGTTCA  
right AGTTGTGTGAGTTCCTTATATATTTTTGTATTTAGTCCCT-----  
222222222222222222222222222222222222222222222222222222222222222222
```

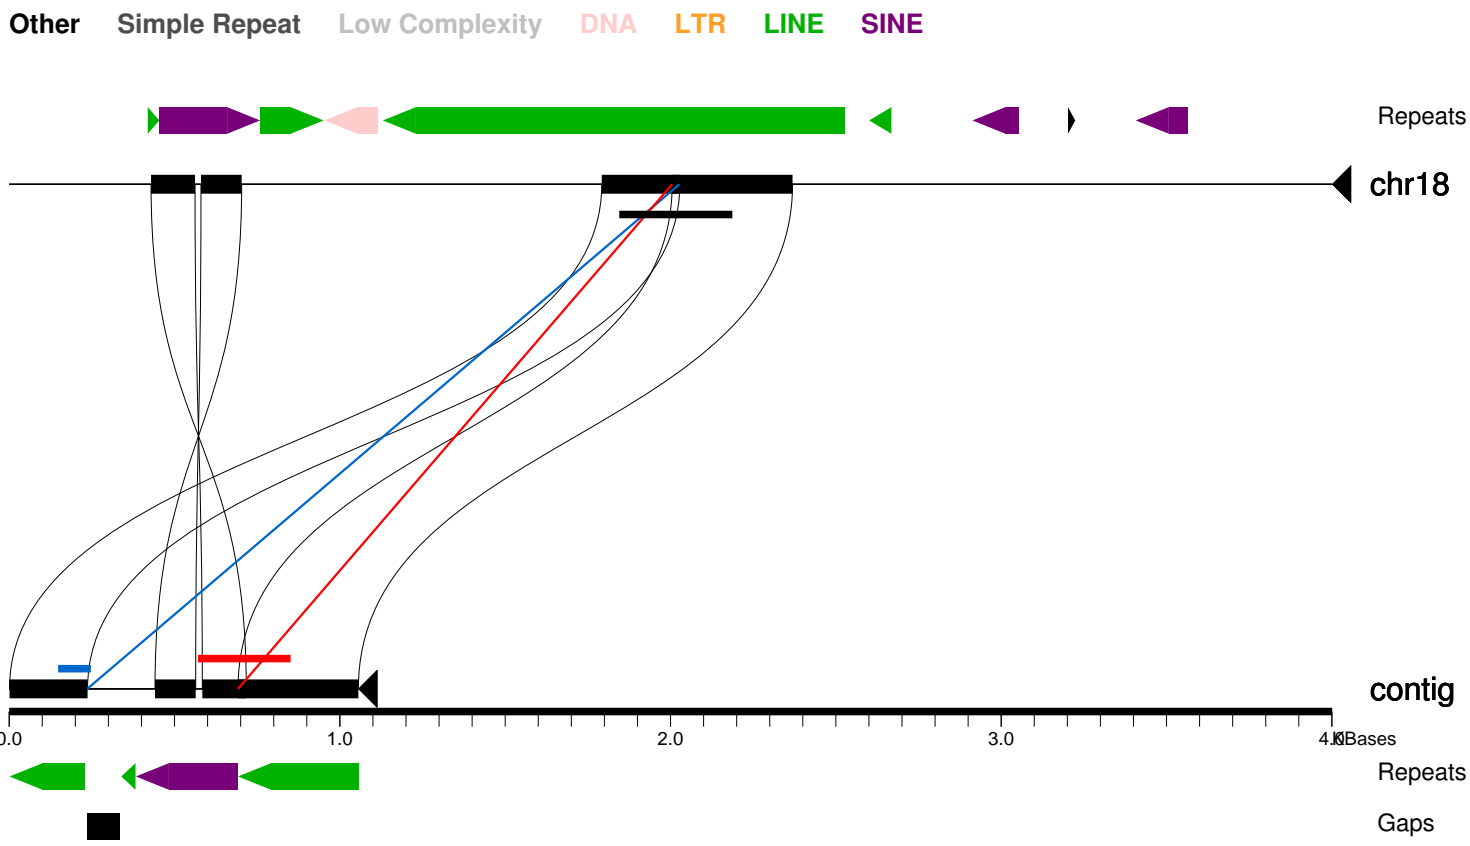

siteID: chr18\_66572512 Scaffitg1 - Breakpoint: chr18:66572495

chr18:66572335-66572661

Overlap Length: 7 INS size: 326 Genotyped: Yes

```
left -----TAAAATCTCCTTCATGTGTATCAAACAGGTGATATGTTAACCCATATCCAATTA
chrom AGTTTATATTATTCCTTAAAAATCTCCTTCATGTGTATCAAACAGGTGATATGTTAACCCATATCCAATTA
right ----TTTAGTAG-----AGACGGGGTTTCACC-GTTTTAGCCAGG----ATGGTCTCG-ATCTCC---TG
      2N22N22N      1*1*111111****111*1*1*11****1111***1*11*11**1***111*1
```

```
left AAACAAAGATGCAAAAATTTGACAATTTAAATCACTTATATTTAATAAAAATACCGTAGCAAAAATTTATGAC
chrom AAACAAAGATGCAAAAATTTGACAATTTAAATCACTTATATTTAATAAAAATACCATAGCAAAAATTTATGAC
right ACCTCATGATCCACC-----CGCCTCGGCCTCCCAAAGTGC--TGGGATTACAGGCGTG
      *1111*1***1**1111111111111111111*1*1*11111*111***1*1*1N*1*1*11*11111*11
```

```
left ATTTACGAATGTCAGCTGTGAAATTAATTTTTTTT--ATTTTATTTTTATT----TATT-----
chrom ATTTACGAATGTCAGCTGTGAAATTAATTTTTTTT--ATTTTATTTTTATT----TATT-----
right AGCCACCGCGCCCGGCCG--AAATTATATATTTTTTAATGTTTGTATGTAAGTACTAGCATACTACTAATAATC
      *111**111111*1**1*11*****2*2*****22*2***22*2*2*2*2*2222**2*2222222222
```

```
left ---TATTTTTTTT-----TGAGACGGAG-----TCTCGCT--CTGTCGCCCAGGTCGGACTGCGGAC
chrom CACTATATTATTACAAAATAATGAGATAAAATAATTTACCTTCCTATTTAAAAGGACATAAAAAC--AC
right CACTATATTATTACAAAATAATGAGATAAAATAATTTACCTTCCTATTTAAAAGGACATAAAAAC--AC
      222***2**2**22222222*****222*222222*2*22**22*2*2222***2*22*222*22**
```

```
left TGCAGTGACGCAATCTCGGCTCACTGCAAGCTCCGCTTCCCGGGTTCACGCC
chrom TATTGTTACAAAAGATTATTTAAAAATAAAACTAAAAATGCAAGT--TTGAGT--
right TATTGTTACAAAAGATTATTTAAAAATAAAACTAAAAATGCAA-----
      *222**2**22*222*222222*2*22**2**2222*2*221N211N1N22
```

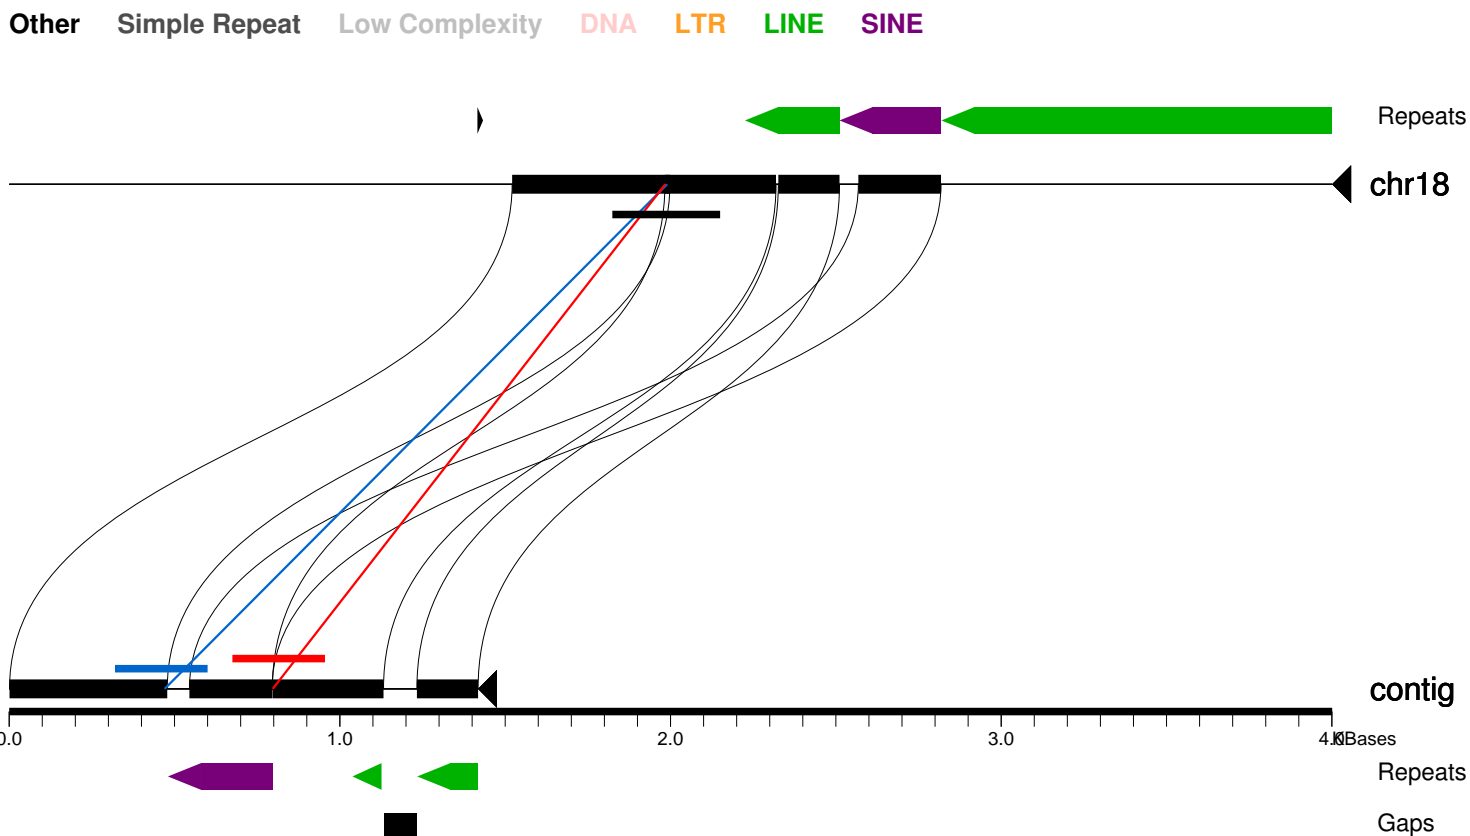

siteID: chr18\_67160053 Scafftig4 + Breakpoint: chr18:67160054

chr18:67159894-67160226

Overlap Length: 13 INS size: 300 Genotyped: Yes

```
left      A-----ATTTTGTTTTCTGTTCATGAATTAATTCACCTTAGACTA-ATGACCTCCAACCTGCATTCATG
chrom     AT--GCAGAATTTTGTTTTCTGTTCATGAATTAATTCACCTTAGACTA-ATGACCTCCAACCTGCATTCATG
right    TTTAGTAGAGACGGGGTTTC-----ACCGTTTATAGCCGGGATGGTCTCGATCTCCTGACCTC
          121112N22211111*1****1111111111111*11111****1*111****11****1*1**1*111*1*1
```

```
left      TTGCTGCAAAGGACATGGTTTCATTCTTTTTCTATGGCTGCATAATATTCATGGTGTATATGTACCAAAA
chrom     TTGCTGCAAAGGACATGGTTTCATTCTTTTTCTATGGCTGCATAATATTCATGGTGTATATGTACCAAAA
right    ATGATCCGCCCGCCTCGGCCTCC-----CAAAG--TGC-TGGGATTACA-GGTGT----GAGCCA--
          1**1*1*1111*1*11**11**1111111111*1*1*11***1*111****1**1****1111*11***11
```

```
left      TTTTCTTTACCCAGTCCACCATTGGTGGGTTTTTTT*****TATAGCTTTGGATTTTTTAAG-GATGGTGTAAAGAAA
chrom     TTTTCTTTACCCAGTCCACCATTGGTGGGCTTTTTT*****TATAGCTTTGGATTTTTTAAG-GATGGTGTAAAGAAA
right    -----CCGCGCCCGCCT-GGTGGGCTTTTTTATAGCTTTGGATTTTTTAAG-GATGGTGTAAAGAAA
          1111111111*11*1*1*11*1*1*1*****2*****2*222***222*****22*2**2**2*222222
```

```
left      --CTC----GCTCTGTCGCCAGGCTGGAGTGCAGTGGCGGGATCTCAGCTCACTG-----CAAGCTCCG
chrom     TACTCAAAAAGGAACGTTTTCTTTTCTTTGAGTATTTAGCTTCAAACCCAGCTCTGTCATTTACTACCTGTG
right    TACTCAAAAAGGAACGTTTTCTTTTCTTTGAGTATTTAGCTTCAAACCCAGCTCTGTCATTTACTACCTGTG
          22***2222*2222**222*2222**2****22222*22222*2*2*****22*222222*2*2**22*
```

```
left      CCTCC-CGGGTTAC-----GCCATTCT-CCTGC-----
chrom     CTTTTTCCTTTTCAAATGAGAATAGTAATACTACCTGCCTTATATTTAAGAATCTTA
right    CTTTTTCCTTTTCAAATGAGAATAGTAATACTACCTGCCTTAT-----
          *2*222*222****2222222222*22**2**2*****22222
```

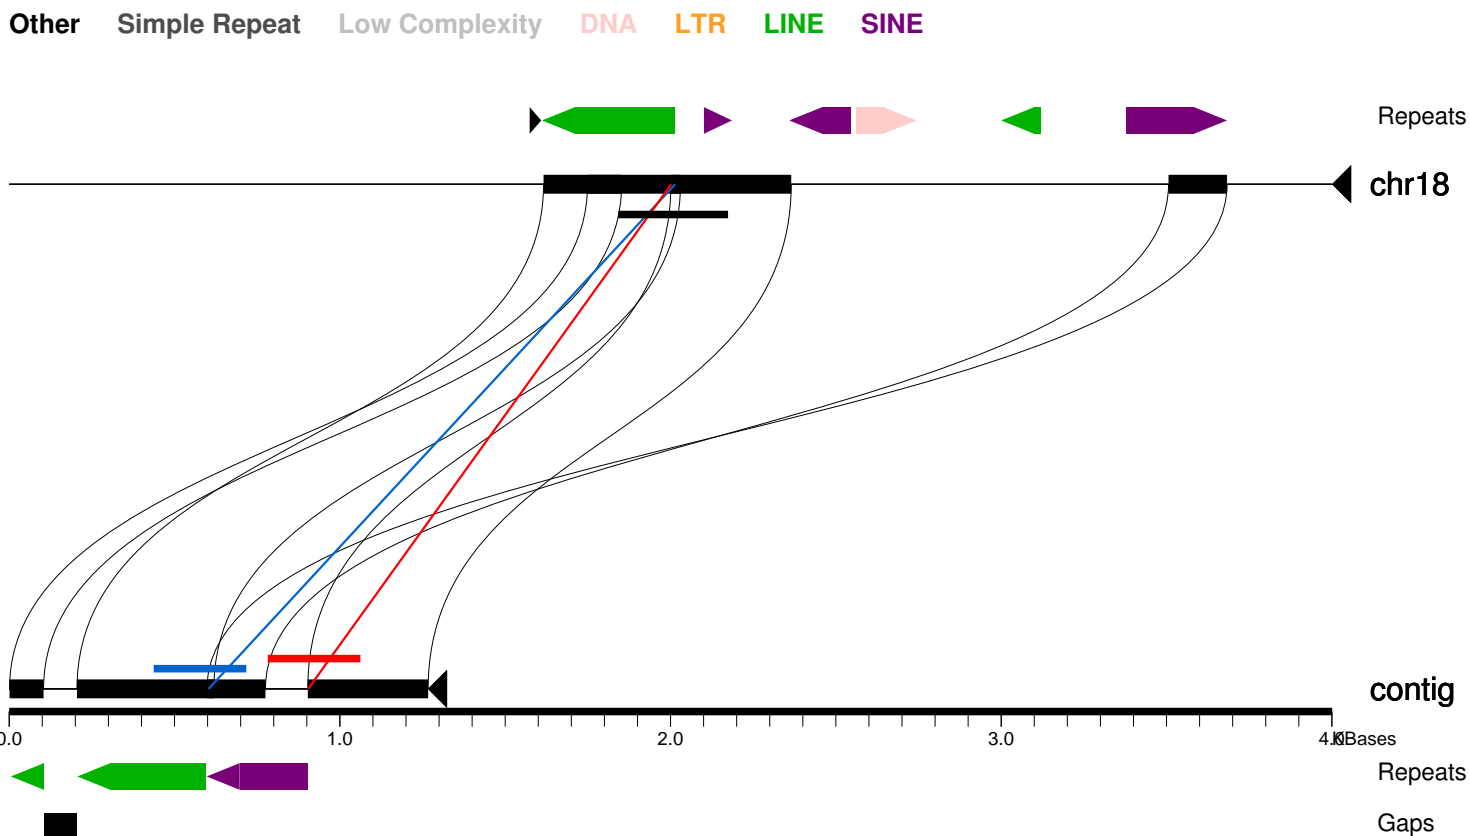

siteID: chr18\_68097009 Scafftig2 - Breakpoint: chr18:68097052

chr18:68096999-68097084

Overlap Length: 7 INS size: 309 Genotyped: Yes

```
left  -----CCATT-----TTTAGATGAATAAAATGTGA-----AGAAAGAGACGAA
chrom -----CCATT-----TTTAGATGAATAAAATGTGA-----AGAAAGAGACGAA
right TGAGTCGAGATCGCGCCACTGCACTCCAGCCTGGGCGACAGAGCGAGACTCCGTCTCAAAAAAAAAAAAAA
11111111111111111111***1*1111111111111*1*11**111*11*1**1111111111*1***1*1*11**
```

```
left  AGAACATAGAATTTAGAAAAATGGGCCGGGCGCGGTGGCTCACGCCTGTAATCCAGCACTTTGGGAGGC
chrom AGAACATAGAATTTAGAAAAATGAT-----GTGGAT-----GTATTA-----ACT-----ATGC
right AAAAAAAAAAAAAAAAAAAAAAATAAATGAT-----GTGGAT-----GTATTA-----ACT-----ATGC
*1**1*1*1**111*1******222222222222****2*2222222****2*222222****22222*2**
```

```
left  CGAGACGGGCGG
chrom CTAA-----G
right CTAA-----G
*2*22222222*
```

Other Simple Repeat Low Complexity DNA LTR LINE SINE

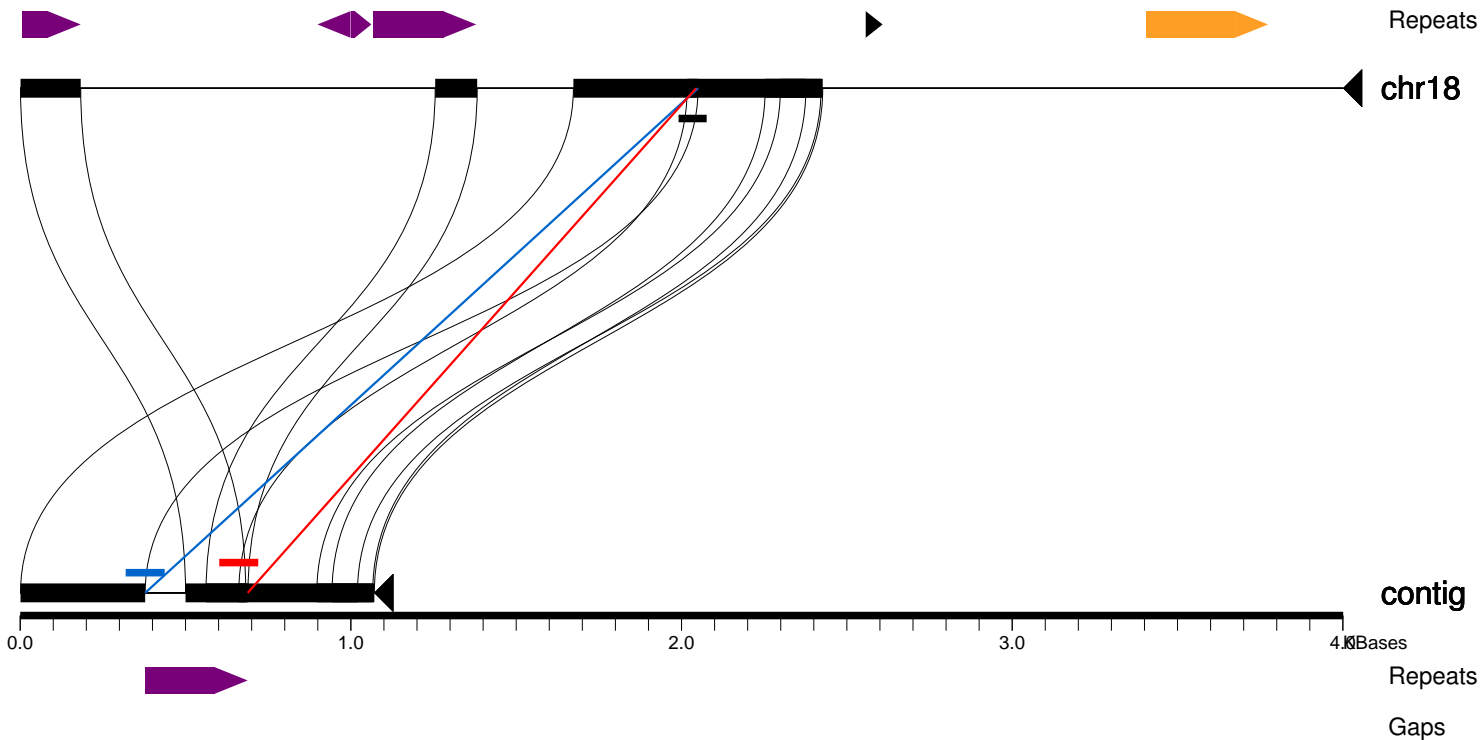

siteID: chr18\_68438293 Scaffitig3 - Breakpoint: chr18:68438274

chr18:68438114-68438441

Overlap Length: 8 INS size: 397 Genotyped: No

left GAA-----ATGAAGAAATTTCAAGAAAAGTCAACTTACTA  
chrom GAAGTCTATGATAACAAATTTT-TAATTTTGTAGATGAAATGAAGAAATTTCAAGAAAAGTCAACTTACTA  
right G-----GCTAATTTTTTTTTTGTATTTTTAGTAGAGACGGG---TTTCAC-----CGTTTTTTTTT  
\*11 2N222N222122N22222N222N\*1\*11\*111\*\*\*\*\*111111111\*111\*11\*1

left AACTGACACAAGAAGAAAGTCTAAAAATTTTCA--TATTTATGTAATTGAATCTGT-TACAAATGAAAG  
chrom AACTGACACAAGAAGAAAGTCTAAAAATTTTCA--TATTTATGTAATTGAATCTGT-TACAAATGAAAG  
right AGCCGG-----GATGGTCTCGATCTCCTGACCTCGTGATCCGCCCCGCTCGGCCTCCCAAAGTGCT  
\*11\*1\*1111111111\*11\*\*\*\*\*11\*11\*11\*1\*11\*11\*1\*111111\*11\*1\*11\*1\*1\*1\*1111

left GAAGGATTTCTTTATATATTTCTGGATAGTAAATNNNNNNNNNN-----  
chrom GAAGGATTTCTTTATATATTTCTGGAATAGTAAATCACTTTTATAAATACATGTTTGAATACCTTTACCCCA  
right G--GGATTAC-----ATAGTAATCACTTTTATAAATACATGTTTGAATACCTTTACCCCA  
\*11\*\*\*\*\*1\*11111111111111\*1\*\*\*\*\*1\*2222222222222222222222222222222222

left -----  
chrom CTTGTCACTTGACTTTTAATACCCCTCTATGGTGTCTCTCTGACACATAGAAGTTTAAAAATGTAAGTAGA  
right CTTGTCACTTGACTTTTAATACCCCTCTATGGTGTCTCTCTGACACATAGAAGTTTAAAAATGTAAGTAGA  
222222222222222222222222222222222222222222222222222222222222222222

left -----  
chrom ATGTCCAAGATATTACTAGTGTTCCTGATGTGCCTTGTTTCATCTTACCTTT  
right ATGTCCAAGATATTACTAGTGTTCCTGATGTGCCTTGTTTCATCT-----  
22222222222222222222222222222222222222222222222222222

Other Simple Repeat Low Complexity DNA LTR LINE SINE

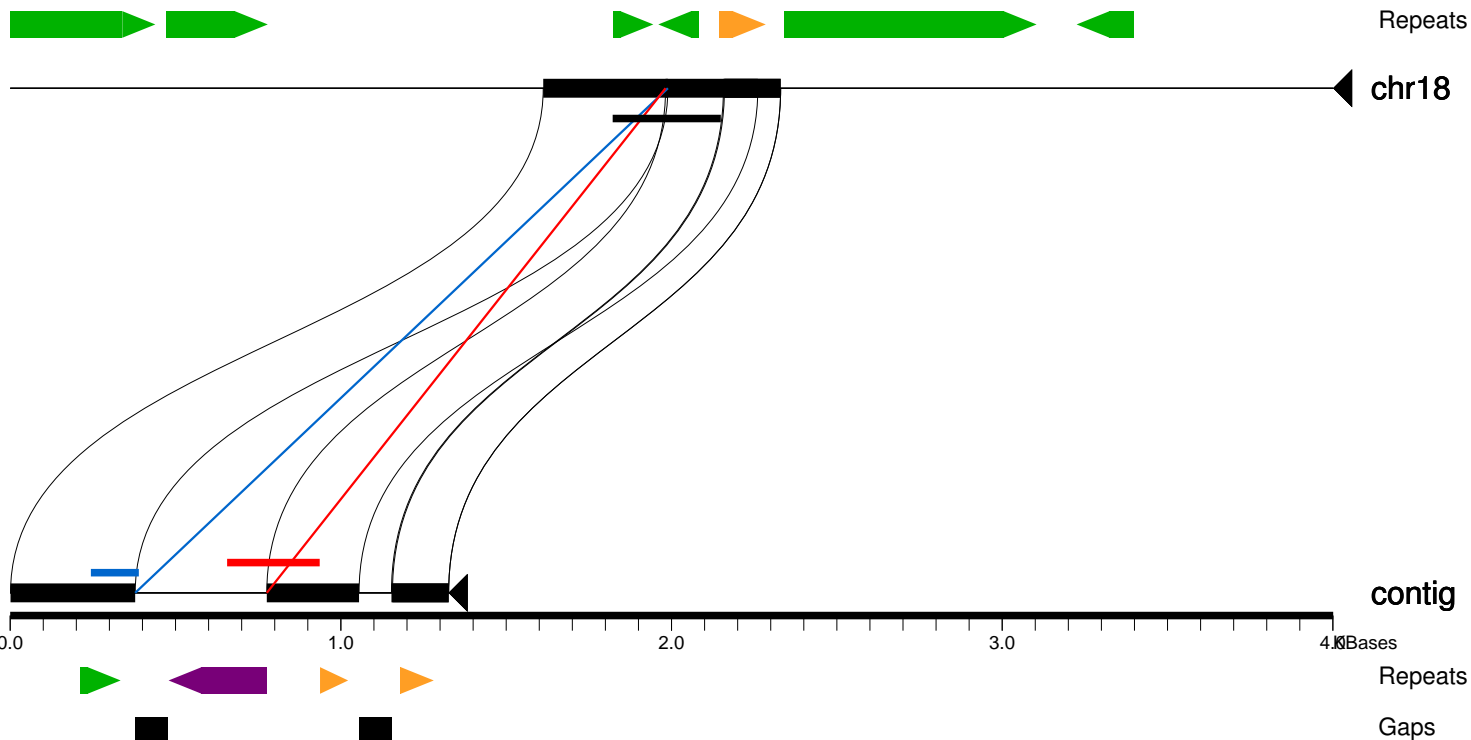

siteID: chr18\_68572084 Scaffitg1 - Breakpoint: chr18:68572142

chr18:68572098-68572201

Overlap Length: 16 INS size: 183 Genotyped: Yes

```
left   TAAG---ATAGAAAT---AAATTTCT---ATCTCTTTTAAGATTA-----CTCAACTTGGGAAGCTTCCT
chrom  TAAG---ATAGAAAT---AAATTTCT---ATCTCTTTTAAGATTA-----CTCAACTTGGGAAGCTTCCT
right  CACCCGCCTCGGCCTCCCAAAGTGCTGGGATTACAGGCGTGAGCCACCGCGCCCGGCCAGGAAGCTTCCT
       1*1111111*1*111*111***1*1**111**11*1111111**1111111111*1*11*11*****

left   GTTTTGTGTTTTTTTTTTTTTTTTTTTTTTTTTTTTTTTTTTTTTTTTTGGAGACGGAGTCTCGCTCTGTCGC
chrom  GTTTTGTGTTTTTTTTTTTTTTTTTTTTTTTTTTTTTTTTTTTTTTTTTGGAGACGGAGTCTCGCTCTGTCGC
right  GTTTTGTGTTTTTTTTTTTTTTTTTTTTTTTTTTTTTTTTTTTTTTTTTGGAGACGGAGTCTCGCTCTGTCGC
       ****2222222222222222*2222*222222*2*22*22**2*2**22*22222*22*222*22
```

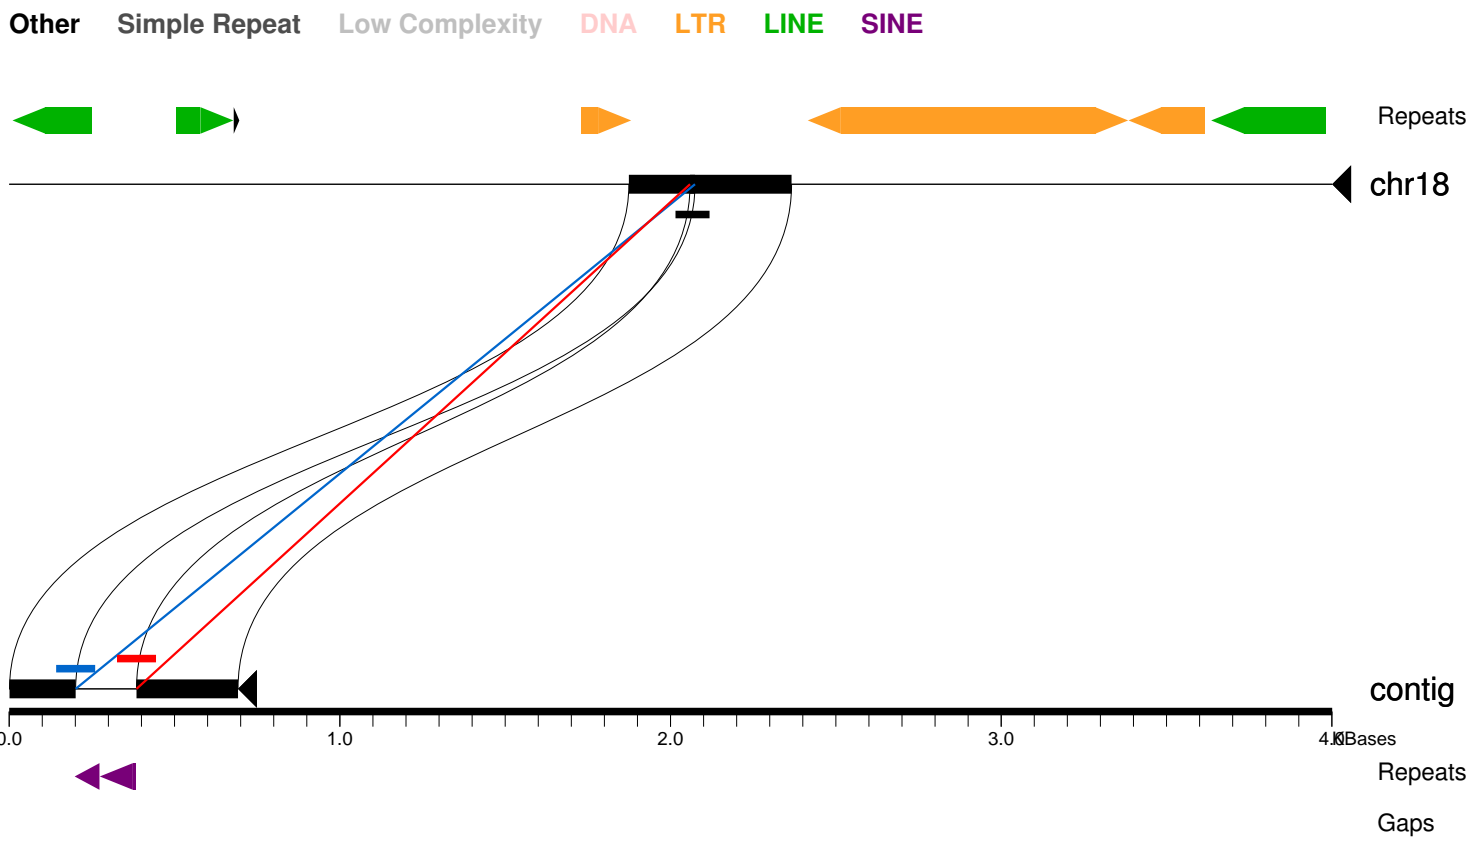



siteID: chr18\_71324643 Scafftig1 + Breakpoint: chr18:71324647

chr18:71324599-71324706

Overlap Length: 12 INS size: 355 Genotyped: No

```

left  ATCCTTATACAGTAACAGATA-----CGTGTTTGTA--GATACATGAGAGA----AATAAAGGCTTTTCT
chrom ATCCTTATACAGTAACAGATA-----CGTGTTTGTA--GATACATGAGAGA----AATAAAGGCTTTTCT
right TTTTTTTAGTAGAGACGGGGTTTCACCGTGTTAGCCAGGATGGTCTCGATCTCCTGACCAAGGCTTTTCT
      1*11**1111**11**1*111111111*****1*1111***111111**11111111*11*****

```

```

left  TTTTNNNNNNNNNNNNNNNNNNNNNNNNNNNNNNNNNNNNNNNNNNNNNNNNNNNNNNNNNNNNNNNNNNNNNN
chrom TGACTGCTGAATAACCGCATGCCTTTGAGTCTGCGCAGCTGTTTAAGGTG-----
right TGACTGCTGAATAACCGCATGCCGTTGAGTCTGCGCAGCTGTTTAAGGTG-----
      *222*2222222222222222N22222222222222222222222222222222222222222222222

```

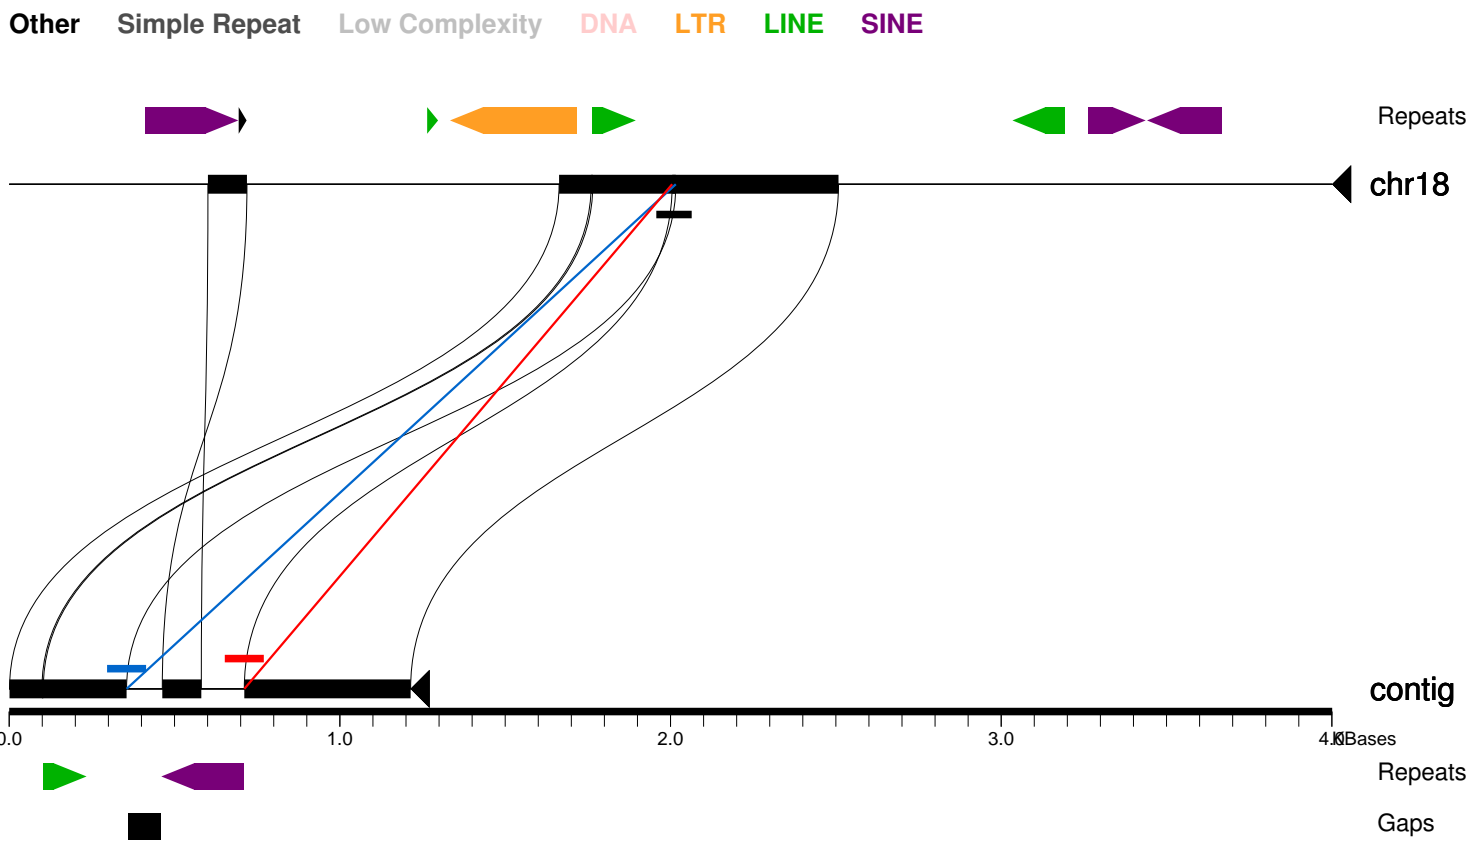



siteID: chr18\_73953944 Scafftig7 + Breakpoint: chr18:73953925

chr18:73953765-73954099

Overlap Length: 15 INS size: 308 Genotyped: Yes

```
left -----ATCTAAAAATATGTCTGTGTGTAATGATCATGAGAAGTTTATTCCAGGAGTTCCAGGA
chrom GTAAAAAAAAAAAAATCTAAAAATATGTCTGTGTGTAATGATCATGAGAAGTTTATTCCAGGAGTTCCAGGA
right TTTAGTAGAGACGGGGTTTCA-----CTGTGT-TAGCCAGGATG----GTCTC-----GATCTCCTGAC
N2N2NN2N2N2NN111*111*11111*****1**111*11***1111**1*1111111**11***1*11
```

```
left GTTTAGTTCCAGAAGTTTATTCTAGTTTAAATATTTGAAAAAT-CAATCAATATAAATTGTTATAGACTGAAT
chrom GTTTAGTTCCAGAAGTTTATTCTAGTTTAAATATTTGAAAAAT-CAATCAATATAAATTGTTATAGACTGAAT
right CTCGTGATCCGCCCGCCTCGGCC-----TCCCAAAGTGCTGGGATTACAAGCGTGAGCCACCG---
1*111*1***1111*11*111*11111111111*111***1*1*1111*1**1*11***1*111*1*111
```

```
left GTTTATATCTCCCTCAAAAAATCATAAGCTAAATCTTT-----TTTTTTTTTTTTTTTTTTTTTTTT
chrom GTTTATATCTCCCTCAAAAAATCATAAGCTAAATCTTTAACACTCAAAGTGATGGTATTTGGAGGTGTGCCT
right -----CGCCCCGCC----CATAAGCTAAATCTTTAACACTCAAAGTGATGGTATTTGGAGGTGTGCCT
111111111*1***111111111***********2222222222*22*22*2***22222*2*222*
```

```
left TGAGACGG-----AGTCTCGCT--CTGTGGCC-CA----GGTGGGAGT-GCAGTGGCGC-----AA---T
chrom TTAGAAGTTATTAAGTCATGAAAGCAGAGCCCTCAAAGTGATGGTATTTGGAGATGGGCCTTTGAAAAGTT
right TTAGAAGTTATTAAGTCATGAAAGCAGAGCCCTCAAAGTGATGGTATTTGGAGATGGGCCTTTGAAAAGTT
*2***2*22222***22*2222*2*2*2**2**2222*2***2*2*2**22*2**2222*2*222*
```

```
left CTCGGCTCACTGCAAGCTCCGCC----TCCAGGTTACGCCATT-----TCCT
chrom ATTAGGTCA-TGAGGGTACAGCCCTTGTGAATGATACTAGAGATTCCAGAGAACTCC-
right ATTAGGTCA-TGAGGGTACAGCCCTTGTGAATGATACTAGAG-----
2*22*2***2*222*22*2***2222*2222*2*2*22*221111 1112
```

Other Simple Repeat Low Complexity DNA LTR LINE SINE

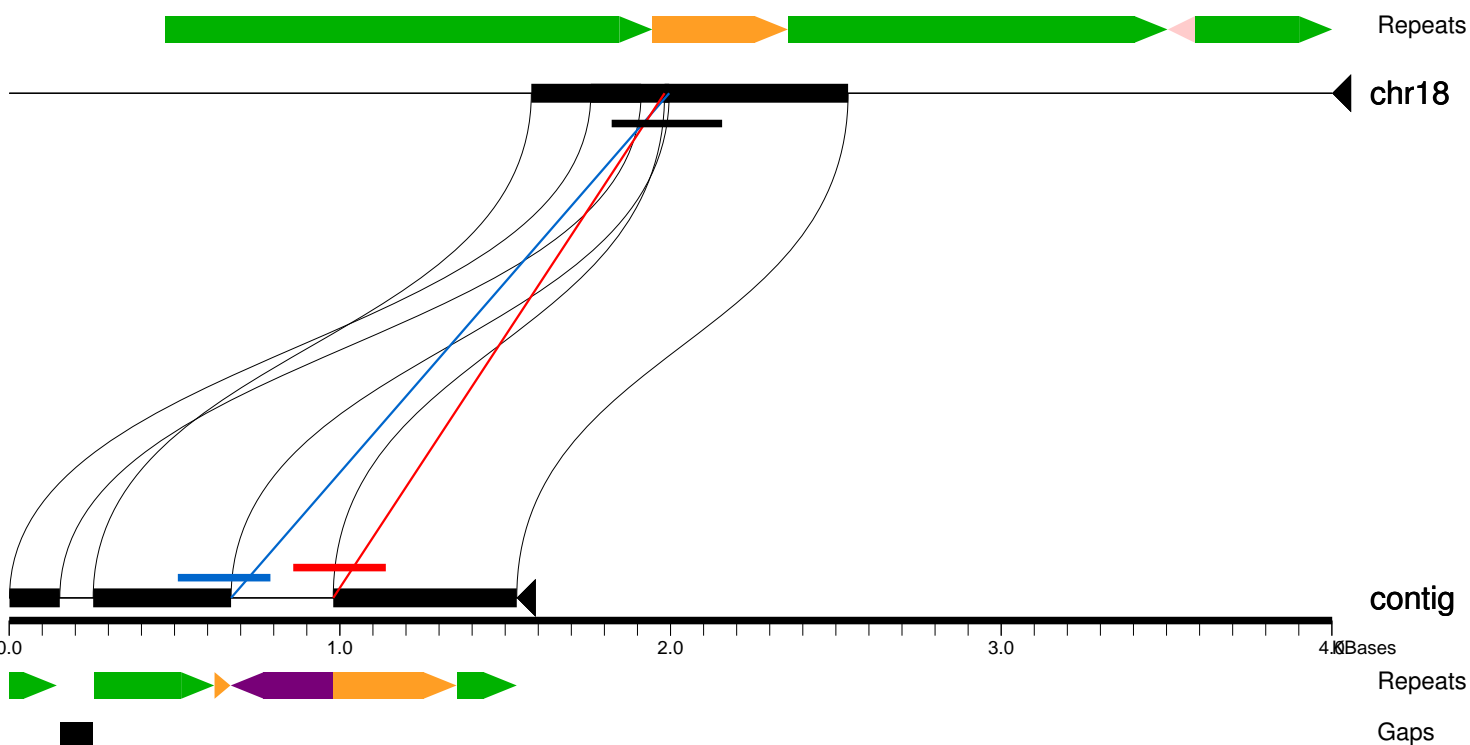



siteID: chr18\_74638697 Scafftig12 + Breakpoint: chr18:74638702

chr18:74638605-74638861

Overlap Length: 46 INS size: 294 Genotyped: Yes

```
left  AA-----GGG
chrom AAAGGGTGATTAGACTGTGTGTGTATATATGGTATAAAGAGTGATTAGACTGTGTGTATGGTATAAAGGG
right GATGGCACC----ACTGCAC-TCTAG-TCTGGGCGACTGAGCGAG-AGACTGTCTCAA-----AAAA-----
      1*N2NNNN      222NNN 2N22N 2N222NNN2NN222N22N 222222N2NN2N 2N222111

left  TGATTAGACCATGTGTGTGTATGGTATAAAGGGTGATTAGACAGTGTGTGTGTGTATGGTATAAAGGGTG
chrom TGATTAGACCATGTGTGTGTATGGTATAAAGGGTGATTAGACAGTGTGTGTG--TATGGTATAAAGGGTG
right -----AAAAGGGTGATTAGACAGTGTGTGTG--TATGGTATAAAGGGTG
      11111111111111111111111111111111*1*****22*****

left  ATTAG---GGCCGGGTGT---GGT-----GGCTCAT-----GCTGTA-ATCC-----
chrom ATTAGACAGTGTGTGTGTATATGGTATAAATAAGGGGTGATTAGACAGTGTGTGTATATGGTATAAAGGG
right ATTAGACAGTATGTGTGTG-----AAAAGGGTGATTAGACAGTGTGTGTG-----
      ****222*2N2*2***N      111      11N1N11      1NN1111 11NN

left  -----CAGCACTT-TGGG-----AGG-----
chrom TGATTAAACAGCATATATGTGTATATGGTATAAAGTAGGTGTTTCGTATT
right -----
      11111NN1 11N1      111
```

Other Simple Repeat Low Complexity DNA LTR LINE SINE

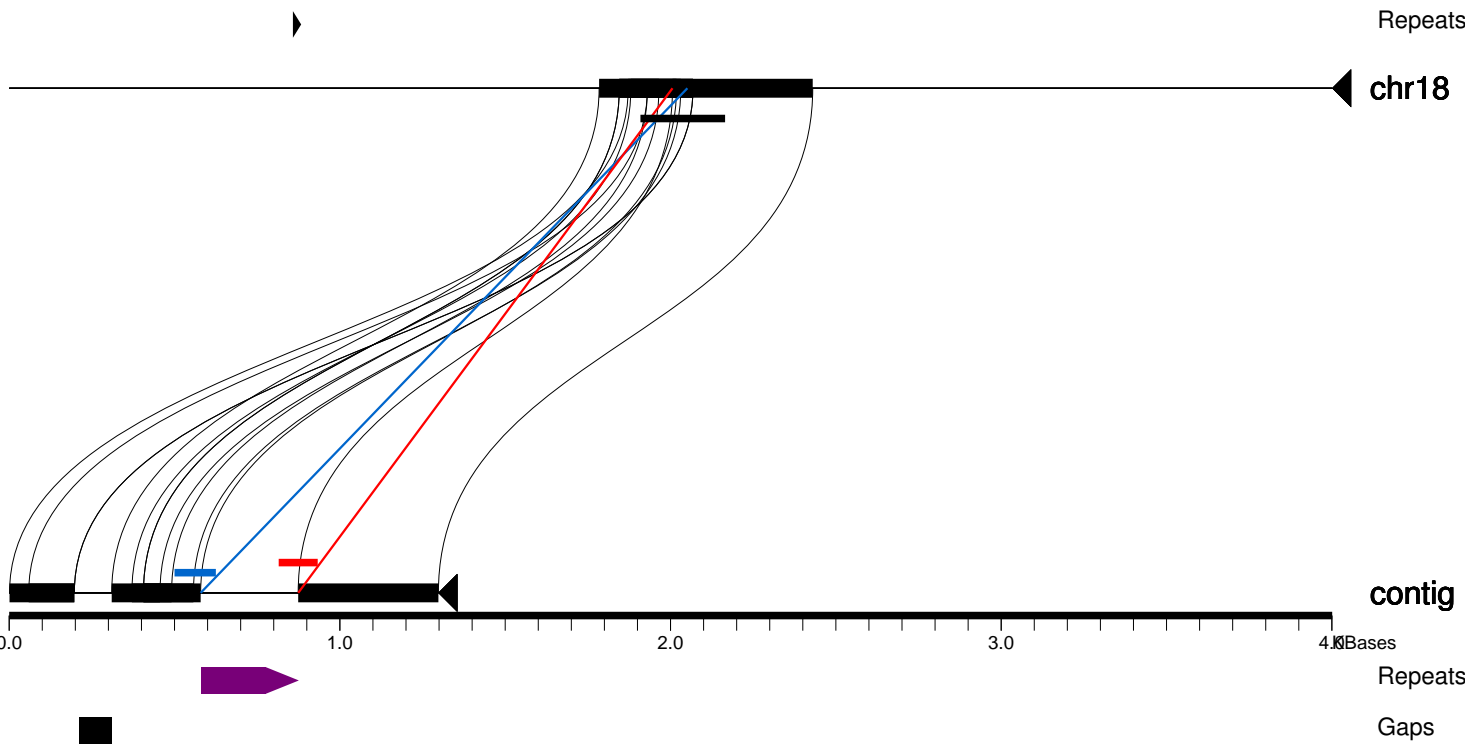



siteID: chr19\_30448192 Scafftig5 + Breakpoint: chr19:30448199

chr19:30448153-30448258

Overlap Length: 14 INS size: 290 Genotyped: Yes

```
left TC-----AAATGAAGGTC-----TGCTTTTATTTCCTTCCCCTTGGTTTCTTTATAG--CCGCTTTTGT
chrom TC-----AAATGAAGGTC-----TGCTTTTATTTCCTTCCCCTTGGTTTCTTTATAG--CCGCTTTTGT
right TCCGCCCGCCTCGGCCTCCCAAAGTGCTGGGATTACAGGCGTGAGCCACCGCGCCCGGC CCGCTTTTGT
**111111111*111111*111111****111***1*111*1111*1111*111111*11*****
```

```
left TTTTTTTTTTTTTTGGAGACGGAGTCTCGCTCTGTCGCCAGGCTGGAGTGCAGTGGCGGGATC
chrom TTTAT-----AGATTGCCTTGTACCTTGTA----ATTTTGAAGTGGATGCCAGATATT
right TTTAT-----AGATTGCCTTGTACCTTGTA----ATTTTGAAGTGGATGCCAGATATT
**2*222222222***22*22*2222*22***22222*222**2*2**2*22222*22**2
```

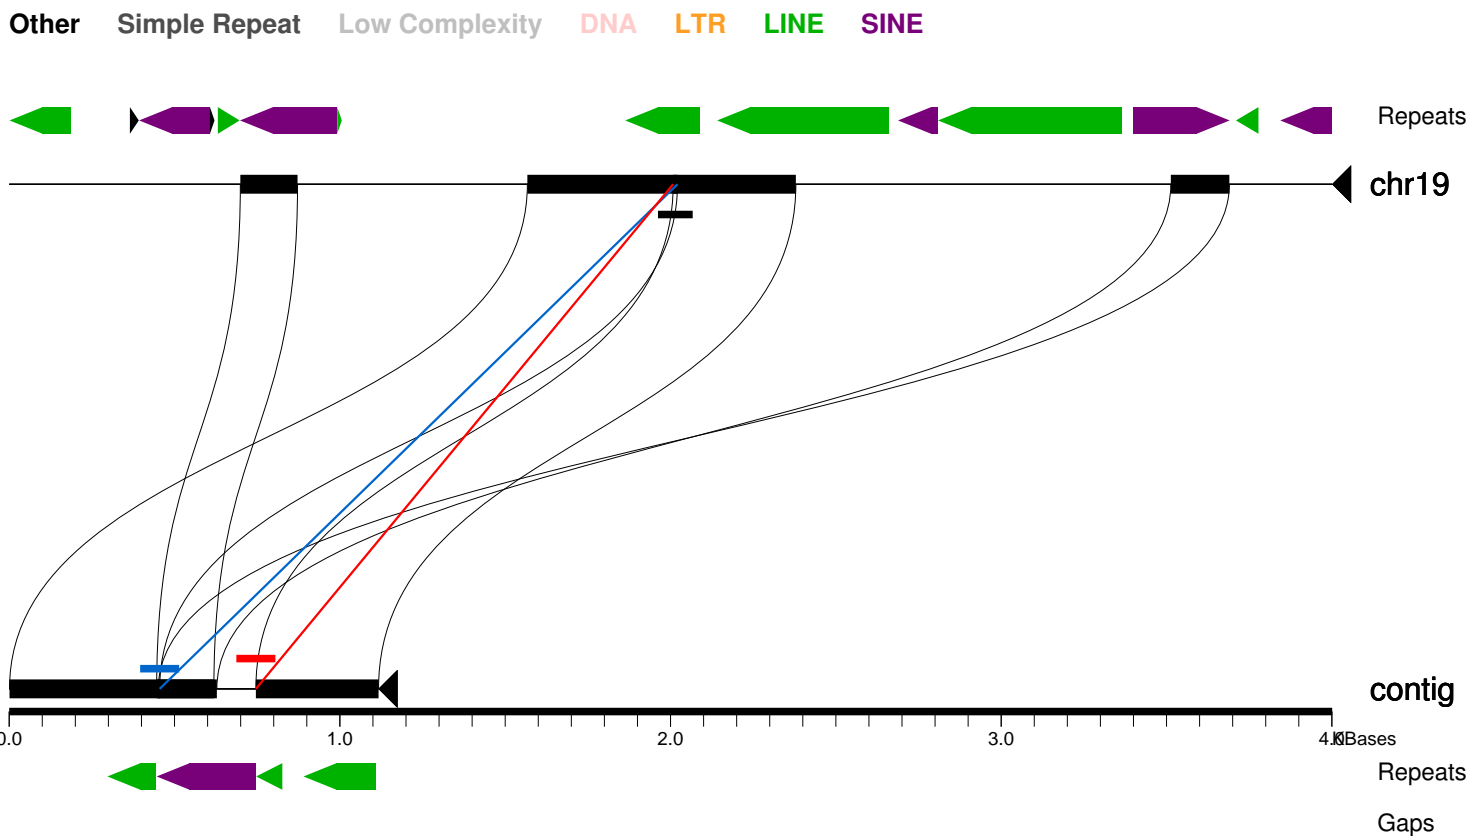

siteID: chr19\_35073561 Scafftig4 - Breakpoint: chr19:35073547

chr19:35073493-35073603

Overlap Length: 6 INS size: 311 Genotyped: Yes

```
left  ATA--CCTAATGAACT-AAAAAACT-----TAAAATCGCAAAAATCTCATAATGTTTAAAGAAAGTTGG
chrom  ATA--CCTAATGAACT-AAAAAACT-----TAAAATCGCAAAAATCTCATAATGTTTAAAGAAAGTTTA
right  TCCAGCCTGGGGGACAGAGCGAGACTCCGTCTCAAAAAAAAAAAAAAAAAAAAAAAAAAAAAAAAAAAAGTTTA
      11111***111*1**11*111*1***11111*1***1111*****1111*1**111111**1*****22

left  CCGGGCGCGGTGGCTCACGCCTGTAATCCAGCACTTTGGGAGGCCGAGGCGGGCGG
chrom  CAAATTTGTGTTGGGCCGCACTGAAAGCC----ACCCTGGGCCGC--AAGCATCC--
right  CAAATTTGTGTTGGGCCGCATGAAAGCC----ACCCTGGGCCGC--AAGCATCC--
      *22222222**2*22*22221**2**2**2222**22***22**22*2**222*22
```

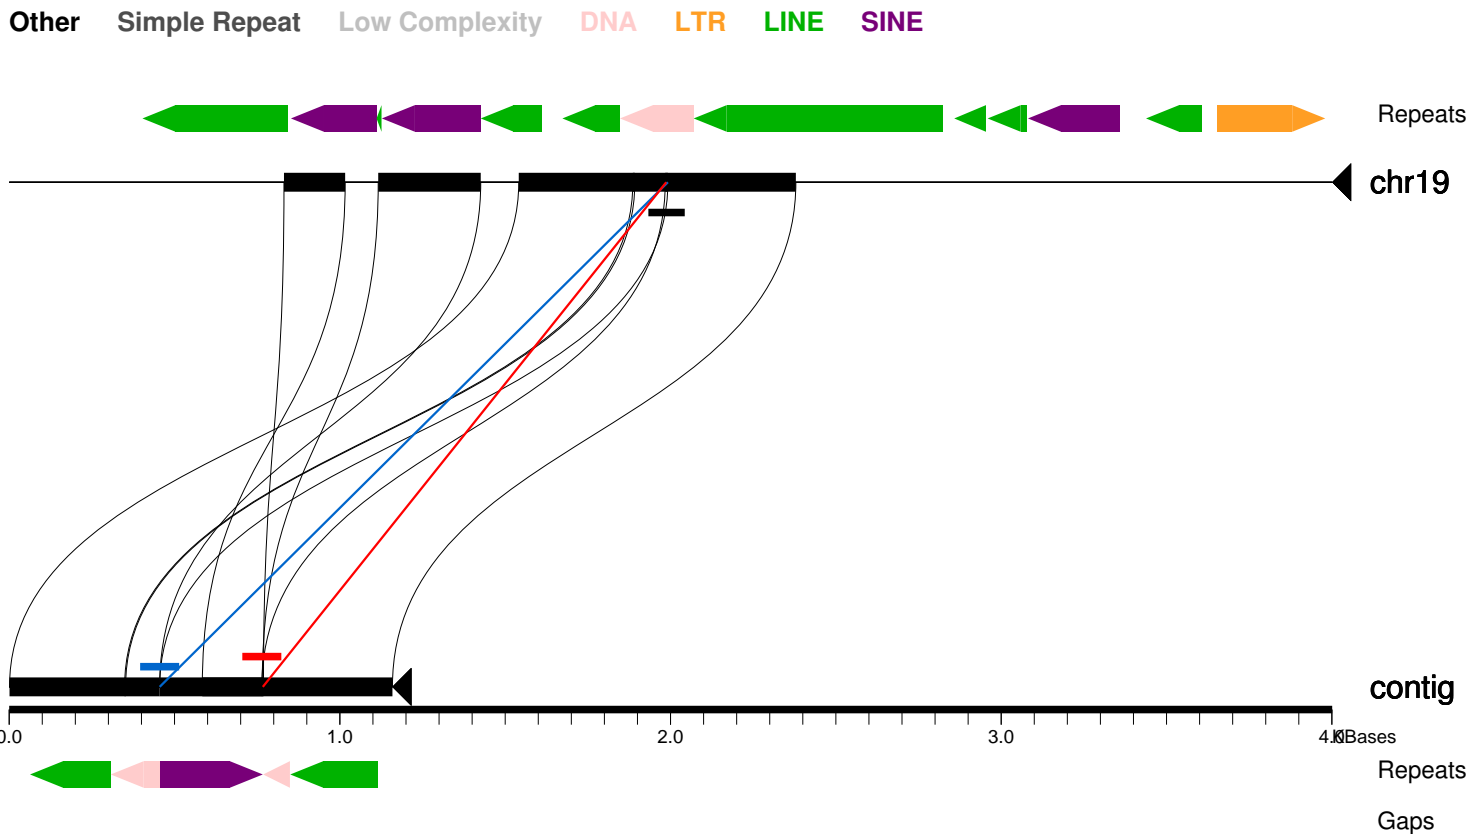



siteID: chr19\_56966041 Scafftig1 - Breakpoint: chr19:56966041

chr19:56966002-56966093

Overlap Length: 21 INS size: 294 Genotyped: Yes

```
left  ---AAGA-----CACTAGACTCCAATCT-----CTTGCCATATGCAAAAAATCAAAT
chrom ---AAGA-----CACTAGACTCCAATCT-----CTTGCCATATGCAAAAAATCAAAT
right GCCGAGATCCCGCCACTGCACTCCAGCCTGGGCGACAGAGCGAGACTCTGTCTCAAAAAAAAAAAAAAATAA
      11111***1111111***11*****11**11111111111111111111**11*111*111*****11***1
```

```
left  AAAAAATGGATTAAAGACGGCCGGGCGCGGTGGCTCACGCCTGTAATCCCAGCACTTTGGGAGGCCGAGGC
chrom AAAAAATGGATTAAAGACAAATCTACGA----CCTAAAAC----AATCAAACACTACTAA-----
right AAAAAATGGATTAAAGACAAATCTACGA----CCTAAAAC----AATCAAACACTACTAA-----
      *****2222222**222222**2*22*2222*****22*22***2222222222222222
```

```
left  GGGCGG
chrom -----
right -----
      222222
```

Other Simple Repeat Low Complexity DNA LTR LINE SINE

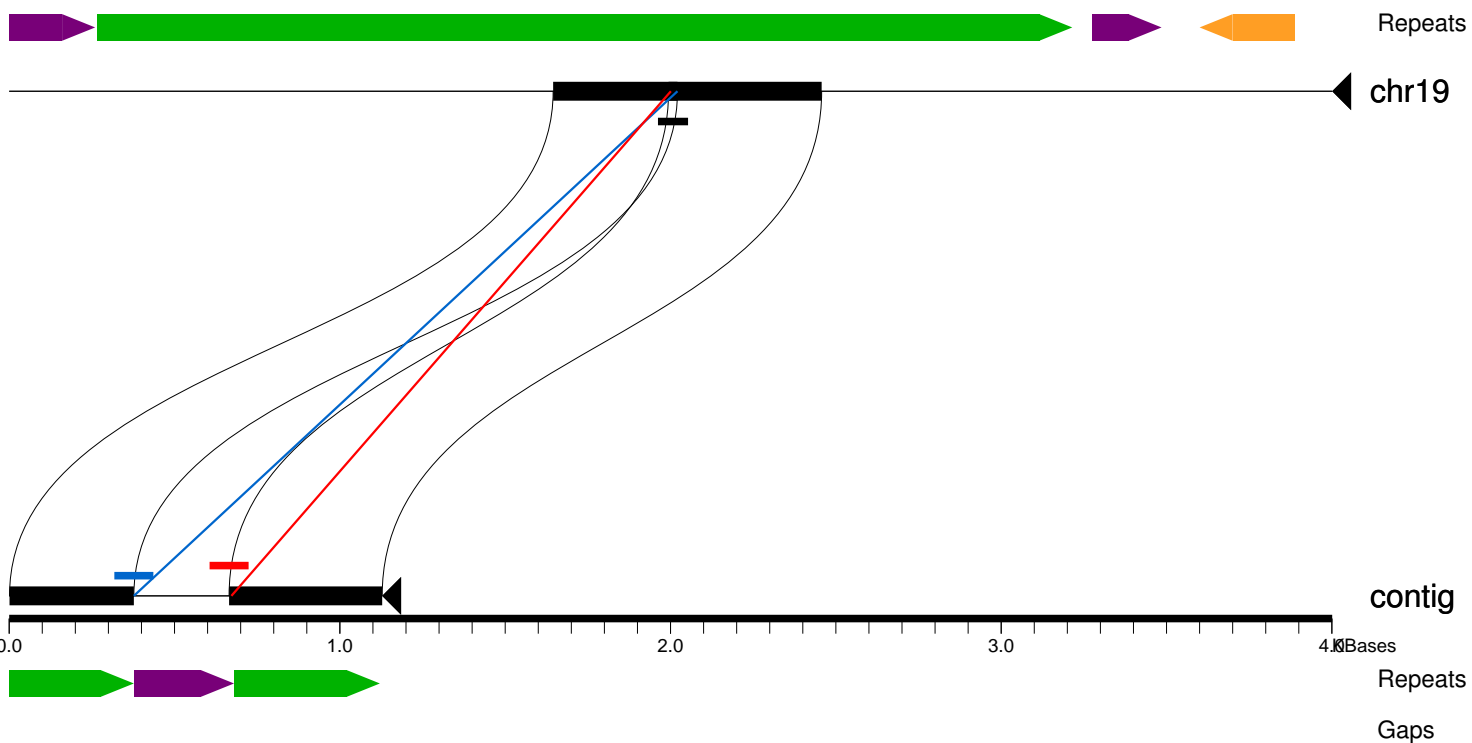



siteID: chr19\_57637008 Scafftig1 + Breakpoint: chr19:57637011

chr19:57636969-57637070

Overlap Length: 18 INS size: 380 Genotyped: No

```
left  -----CTTCCCATTTGCTTGGCAAATATTCCT---CCATCCCTTTATTTTGGAGCCTATGTA
chrom -----CTTTCATTTGCTTGGCAAATATTCCT---CCATCCCTTTATTTTGGAGCCTATGTA
right CCGCCCGCCTCGGCCTCCCAAAGTGCTGGGATTACAGGCGTGAGCCACCGCGCCCGGCCGAGCCTATGTA
      11111111111111111111**1N*1*11****1**111*1*11*1*111***1*1*1111111111*****

left  TGTCTTTTTNNNNNNNNNNNNNNNNNNNNNNNNNNNNNNNNNNNNNNNNNNNNNNNNNNNNNNNNNNNNNN
chrom TGTCTTT-----GCACATGAGATAGGTCTCCTGAATATAGCACATCAATGGGTC
right TGTCTTT-----GCACATGAGATAGGTCTCCTGAATATAGCACATCAATGGGTC
      *****22222222222222222222222222222222222222222222222222222222222222222222
```

Other Simple Repeat Low Complexity DNA LTR LINE SINE

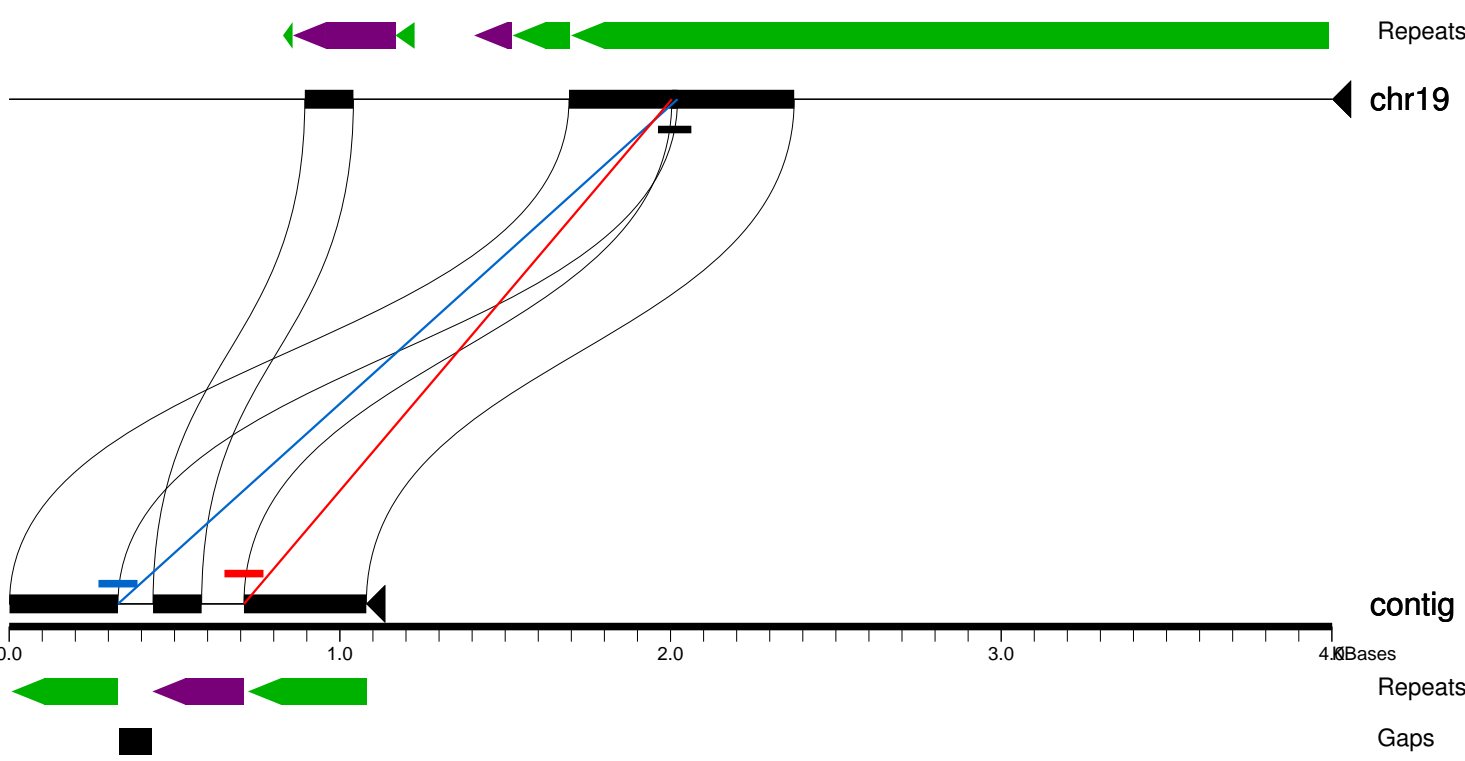



siteID: chr2\_106452573 Scafftig9 + Breakpoint: chr2:106452567

chr2:106452534-106452626

Overlap Length: 12 INS size: 314 Genotyped: Yes

```
left       -----TCATTATTTTAGATTCTT-----TTTtagGCATTTTAT-----GGATTTCCTTT
chrom      -----TCATTATTTTAGATTCTT-----TTTtagGCATTTTAT-----GGATTTCCTTT
right     CCGCCCCGCTCGGCCTCCCAAAGTGCTGGGATTACAGGCGTGAGCCACCGCGCCCGGCCGGATTTCCTTT
          1111111111**1111*111*1*1*11*1111**11****1*11111111111111111111*****
```

```
left      TTTTTTTTTTTTTTTTTTTTTTTTTTTTTTTTTTTTTTTTGGAGACGGAGTCTCGCTGTCGCCAGGCTGGAGTGC
chrom     TCTTTGTTCTGTTATTAGAGAATT-----ACTGTGTTTCTTTGG-----AGGTTTTTATT--
right    TCTTTGTTCTGTTATTAGAGAATT-----ACTGTGTTTCTTTGG-----AGGTTTTTATT--
          *2***2**2*2**2**222222**22222222222222**2*2**2**22**222222***2*22*2*22
```

```
left      AGTGG
chrom     -----
right    -----
          22222
```

**Other** Simple Repeat Low Complexity DNA LTR LINE SINE

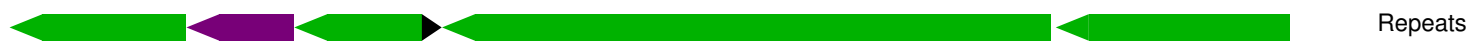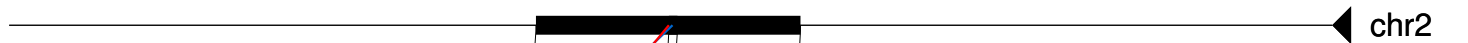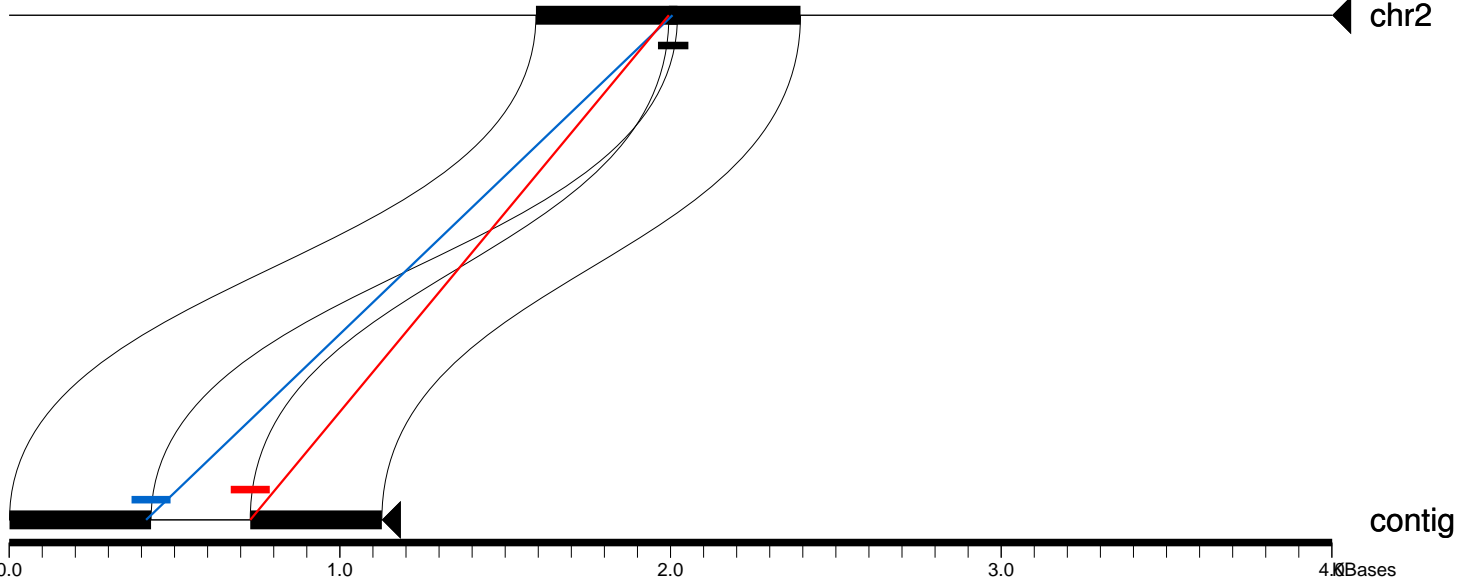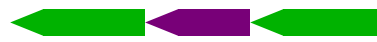

contig  
Repeats  
Gaps

siteID: chr2\_106585635 Scafftig4 - Breakpoint: chr2:106585611  
 chr2:106585451-106585787  
 Overlap Length: 17 INS size: 311 Genotyped: Yes

left TTTT-----ATTATCAATGTTTAAATGGCTATTATCAATGTTTAAATGGCTATTATTTA  
 chrom TTATCAATGTTTAAATGGCTATTATCAATGTTTAAATGGCTATTATCAATGTTTAAATGGCTATTATTTA  
 right AGA-----ATGGCGTGAACCCGGG-----AGGCGGAGCTTGCAGTG----AGCCGAGATCCCGCC  
 1121 22222N111\*1\*111\*1111\*111\*1111\*11\*1\*\*1\*\*1111\*111\*11\*\*111111

left ATTATTATCAATGTTTAAATTTATCAATGGGATAACACAG-GAGAAACAGGAGGAGCCCAATGATGAAGAT  
 chrom ATTATTATCAATGTTTAAATTTATCAATGGGATAACACAG-GAGAAACAGGAGGAGCCCAATGATGAAGAT  
 right ACTGCACTCCAGCCT-----GGGCGACAGAGCGAGACTCCGTCTCAAAAAAAAAAAAAAAAAAAAA  
 \*1\*1111\*\*1\*111\*1111111111111\*\*111\*\*1\*\*1\*\*\*11\*1\*1111\*1111\*\*11\*11\*\*1\*1

left TACTGTCCCTACCCATGTTTAAATCCTCCTAAATTAGCGGGCGCGGTGGCTCACGCCT-GTAA--TCC  
 chrom TACTGTCCCTACCCATGTTTAAATCCTCCTAAATTAGCGGGCGCGGTGGCTCACGCCT-GTAA--TCC  
 right AAAAAAAAAAAAAAAAAA-----AAATCCTCCTAAATTAGAGAACACCCTCCCAGAAGGTTTGCCAGGTCC  
 1\*111111111\*111\*1111111\*111111111111111111\*22222\*2\*22\*22\*22\*2\*22\*22\*\*\*

left CAGCACTT-----TGGGAGGCCG-AGGCGGGCGGATCAC--GAGGTCAGGAGA----TCGAGACC-----  
 chrom CATCCCTTCCAGGTTTGAGTTGGTACTTGGGCTACTTTTCTGATGTTTGAAGCAATTTCTAGAACTGCTT  
 right CATCCCTTCCAGGTTTGAGTTGGTACTTGGGCTACTTTTCTGATGTTTGAAGCAATTTCTAGAACTGCTT  
 \*\*2\*2\*\*\*22222\*22\*\*\*222\*2\*222\*\*\*222\*22222\*2\*\*22\*2\*\*22222\*2\*\*\*2\*22222

left -----ATCCCGCTAAAACGG---TGAAACCCCGT---CT--CTACTGAAA-  
 chrom TTTCCATTATCATCTATGTTAAAAACAGCAATTAGAGACATTTAAACTTACCACAGACCC  
 right TTTCCATTATCATCTATGTTAAAAACAGCAATTAGAGACA-----  
 2222222222\*\*222\*2\*\*\*\*\*2\*222\*2\*2\*22\*2N1 11 1N11N11N

Other Simple Repeat Low Complexity DNA LTR LINE SINE

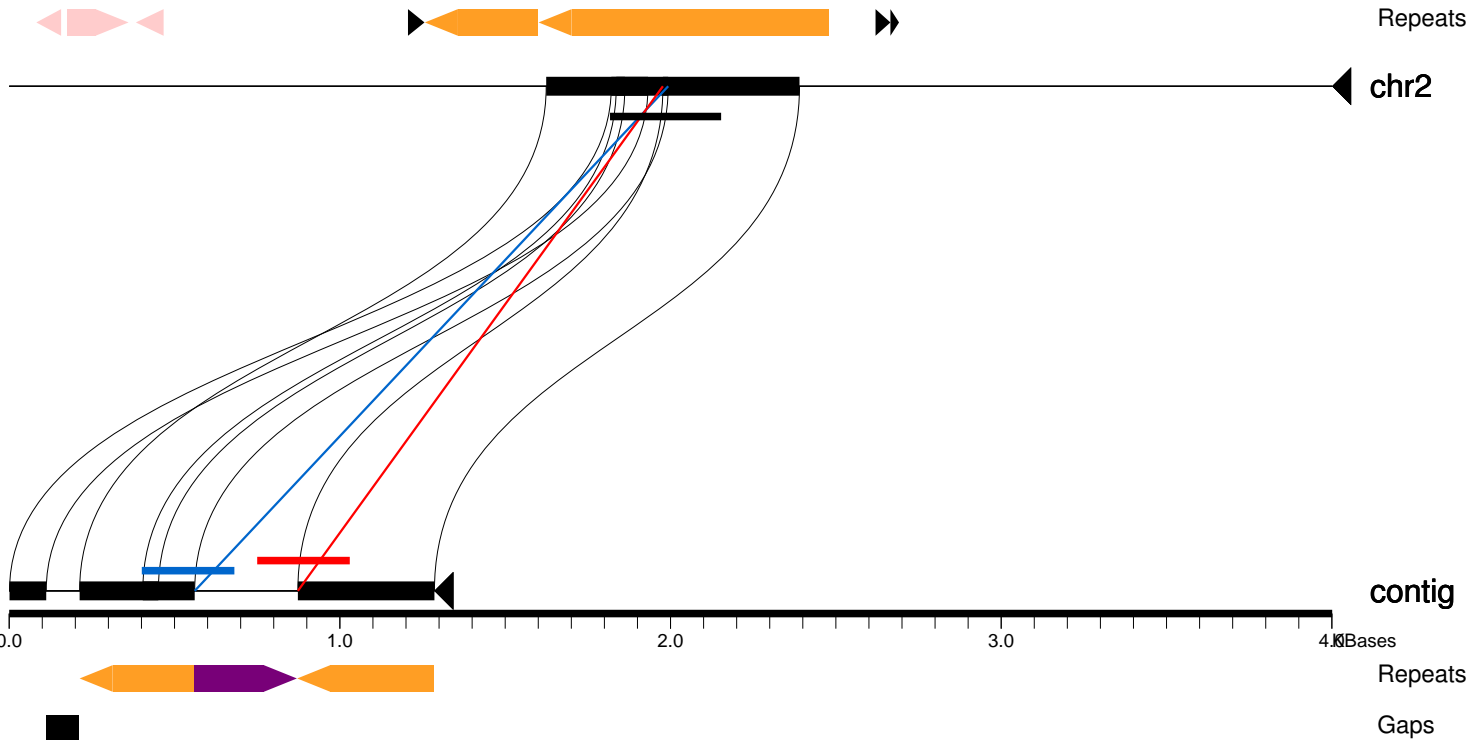

siteID: chr2\_107924640 Scafftig1 + Breakpoint: chr2:107924608

chr2:107924448-107924784

Overlap Length: 17 INS size: 255 Genotyped: Yes

```
left -----TAATTTTCTTTCTCACCAATAGTGTATAAGAGTTCCCTTTTCTCTGGATCCTCAAAGCA
chrom AATTGCTGTACTAATTTTCTTTTCTCACCAATAGTGTATAAGAGTTCCCTTTTCTCTGGATCCTCAAAGCA
right -----CTACAGGCGTGCGCCACCCTCTGGCTAATTTTTGTATTTTTAGTAGAGACG----GGG
          2**111111*1111*****1*11**11**111**111*****111*1**11*11111*11
```

```
left TGTTACTTTTTCTTTTTATCAATAGCCATTCTAACAGGGGTAAAATGGTATCTCATTGTGGTTTTAATTT
chrom TGTTACTTTTTCTTTTTATCAATAGCCATTCTAACAGGGGTAAAATGGTATCTCATTGTGGTTTTAATTT
right TTTACCCGTGTC-----AGCCA-----GGATGGTCTCG-ATCTCCT-GACCTCGTGATCC
          *1*1**11*1**11111111111*****1111111111**1*1111*1*1*****1*1*111*11*1**11
```

```
left GAATGTCCTTGATAATTAGTGTATGTTTCAGTATTTTTTT-----TTTCTTTTTTGT---TT
chrom GAATGTCCTTGATAATTAGTGTATGTTTCAGTATTTTTTTACATACCTGTTGGCCATTTCTATTTCTTATTTT
right GCCCGTCTCGGCC---TCCCAGTGTTCAGTATTTTTTTACATACCTGTTGGCCATTTCTATTTCTTATTTT
          *111***111*111111*111*****2222222222222222*****2***22*222**
```

```
left GAGACGGAGTTTCGC-----TCTGTGCGCC--AGGCTGGAGCGCAGTGGCGCGATC-TCGACTCACTGC
chrom AAGAAAATATTTTTTCATGTTATCTGTCCACTTTATAATGG-GATTATTAGTGGGTTGGTTTTCTTGTGTTGA
right AAGAAAATATTTTTTCATGTTATCTGTCCACTTTATAATGG-GATTATTAGTGGGTTGGTTTTCTTGTGTTGA
          2***222*2***22*222222*****22*222*222***2*222*2*2*2*2*22*222**222**2
```

```
left AAGCTCCGCCTCCCGGGTTCAC---GCCATTCT---CCTGCCTCA-----
chrom TTTGTTTGGAGTTCCCTTGTATATTTTGGATATTAGTTCCCTGTCTGATGAATTGGGTAC
right TTTGTTTGGAGTTCCCTTGTATATTTTGGATATTAGTTCCCTG-----
          2222*22*22*2**22**22*22222*22***22222***N11N1
```

Other Simple Repeat Low Complexity DNA LTR LINE SINE

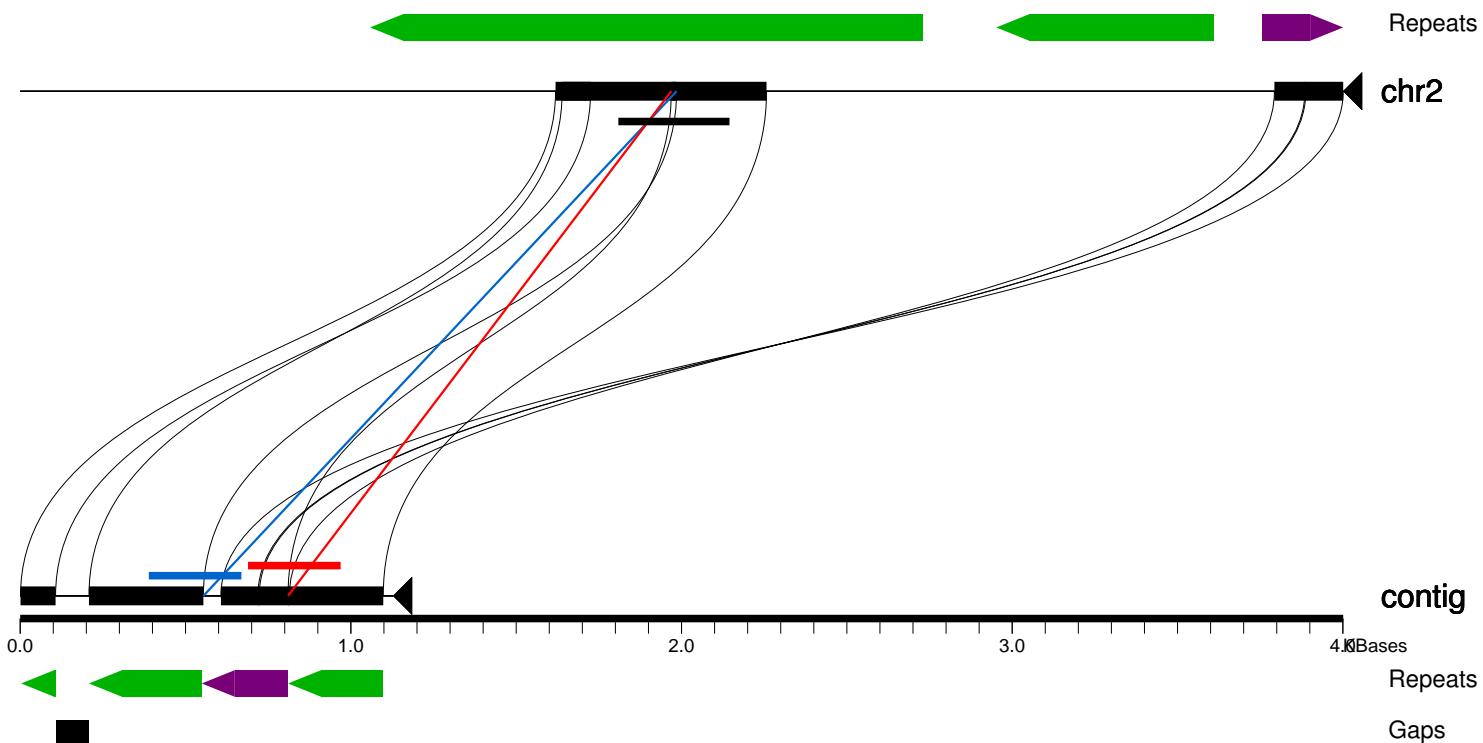

siteID: chr2\_112447442 Scafftig8 - Breakpoint: chr2:112447423

chr2:112447263-112447596

Overlap Length: 14 INS size: 311 Genotyped: Yes

```
left -----GCAGGGGTGGGAGGAGGCCCCCTCAGAGAAACTTCGAAAATCAGTAGGGCCTTTTCTGTCA
chrom TTTCTCAGGGCAGGGGTGGGAGGAGGCCCCCTCGGAGAAACTTCGAAAATCAGTAGGGCCTTTTCTGTCA
right TTTAGTAGAGACGGGGTTTCACCGTGTTAGCCAGGATGGTCT-CGA-----TCTCCTGACC
222NNN22N*11*****111*1111*1111*112**1111**1***11111111111111*1*1***1*1
```

```
left TCACCATGACAGGGAAGGGACTGACAGAATTTGGCAGATGCAGTAAGAAATCCAGAACAATCCCTGAC
chrom TCACCATGACAGGGAAGGGACTGACAGAATTTGGCAGATGCAGTAAGAAATCCAGAACAATCCCTGAC
right TCATGATCCGCCCGCCTCGGC-CTCCCAAAGT---GCTG--GGATTAC--AAGCGTGAGCCACCGCG---
***11**111111*1111*1*1**11**1*1*111**1*11*1*1**111**1*11**1*1*1*1111
```

```
left AACAAAGAATCATCCCACATCCCAAATGATTTTCCTTTTTTTTTTTTT-----TTT
chrom AACAAAGAATCATCCCACATCCCAAATGATTTTCAAACATCCTTGTGACAGCCTCATGGGTAAAAATCT
right -----CCCGGCCCCCAAATGATTTTCAAACATCCTTGTGACAGCCTCATGGGTAAAAATCT
11111111111111**1111***********22222*22**2**222222222222222222*2*
```

```
left TTTTTTTTTTTTGAGAC-GGAGTCTCGCTC-----TGT-----GGCCAGGTGGGAGTGCAGTGG
chrom ATTAATTACCTGAGCCTGGAACCTAATTCCATTTTATATGTAAACATTGTACGGGGTGTTTTTTACATGG
right ATTAATTACCTGAGCCTGGAACCTAATTCCATTTTATATGTAAACATTGTACGGGGTGTTTTTTACATGG
2**22**222****2*2***22**222**222222222***2222222*22*22****2222*2222***
```

```
left CGCAATCTCGGCTCACTG--CAAGCTCCGCCTCCAGGGT-----TCACGCCATT
chrom CTTAAAAATACACTGAATTTCCCAGGAATGCAACCATTGTACCCATCAAGAGAAG
right CTTAAAAATACACTGAATTTCCCAGGAATGCAACCATTGTA-----
*22**22*222**2*2*222*2**2222**22**22**2 111N1NN1NN
```

Other Simple Repeat Low Complexity DNA LTR LINE SINE

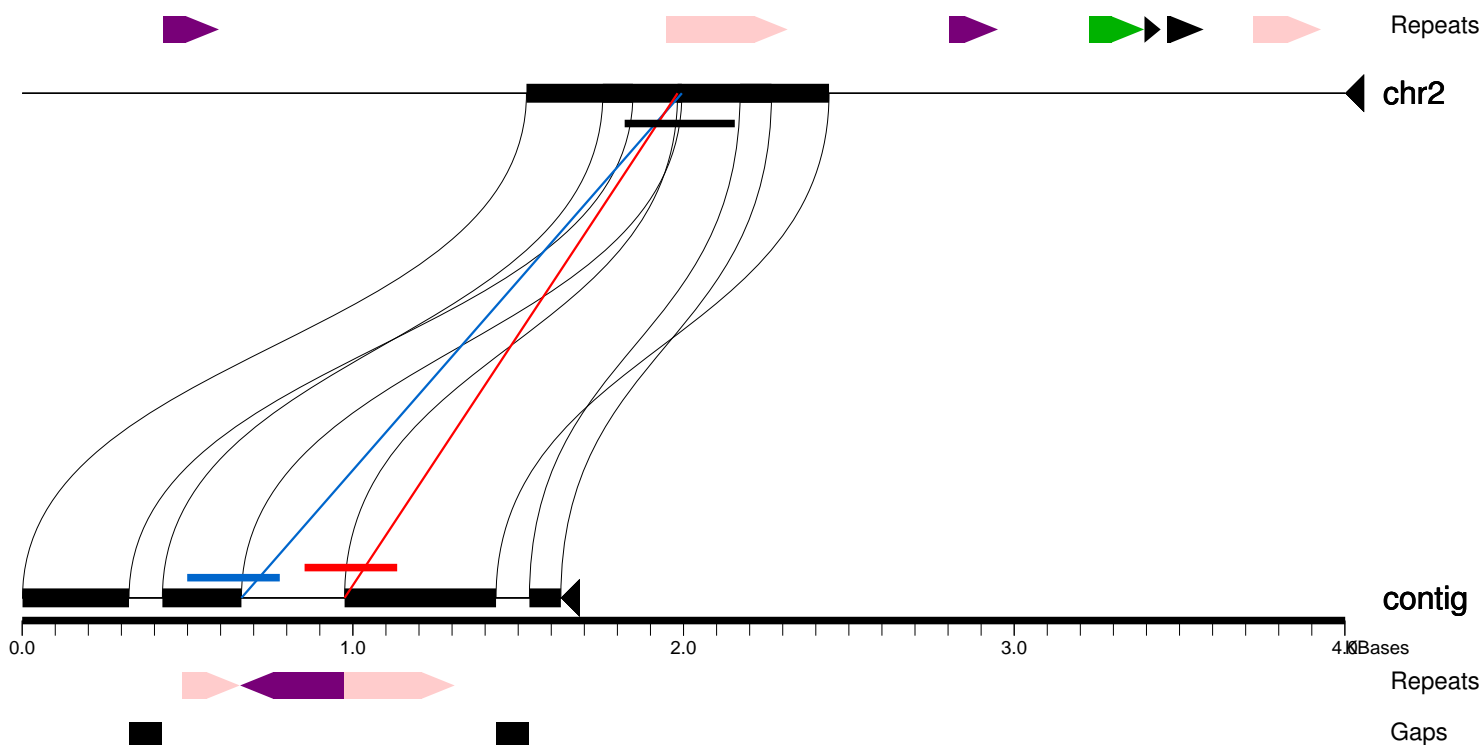







siteID: chr2\_115833861 Scafftig8 + Breakpoint: chr2:115833867

chr2:115833827-115833926

Overlap Length: 14 INS size: 302 Genotyped: Yes

```
left  CAGTTTATTTT-----TTAAGGAATTAAATGCTATAAACACAATT-----GAGATCCTTTT
chrom CAGTTTATTTT-----TTAAGGAATTAAATGCTATAAACACAATT-----GAGATCCTTTT
right CCGCCCACCTCGGCCTCCCAAAGTGCTGGGATTACAGGCGTGAGCCACCGCGCCCGGCCGAGATCCTTTT
      *1*111*11*111111111111111*111**1***1*1**111*11***111111111111*****
```

```
left  TCTTTCTTTTTT---TTTTTTTTCCGAGACGGAGTCTCGCTCTGTCCCCCAGGCTGGAGTGCAGTGGCGC
chrom TCTACCTTTCTCCCATATCATTTCCT-----TCCCTCC-TCCTCCA--CTATA-----CAT
right TCTACCTTTCTCCCATATCATTTCCT-----TCCCTCC-TCCTCCA--CTATA-----CAT
      **22***2*2222*2*22*****222222222222**2***22***2***22**22*222222222*22
```

```
left  G
chrom A
right A
      2
```

Other Simple Repeat Low Complexity DNA LTR LINE SINE

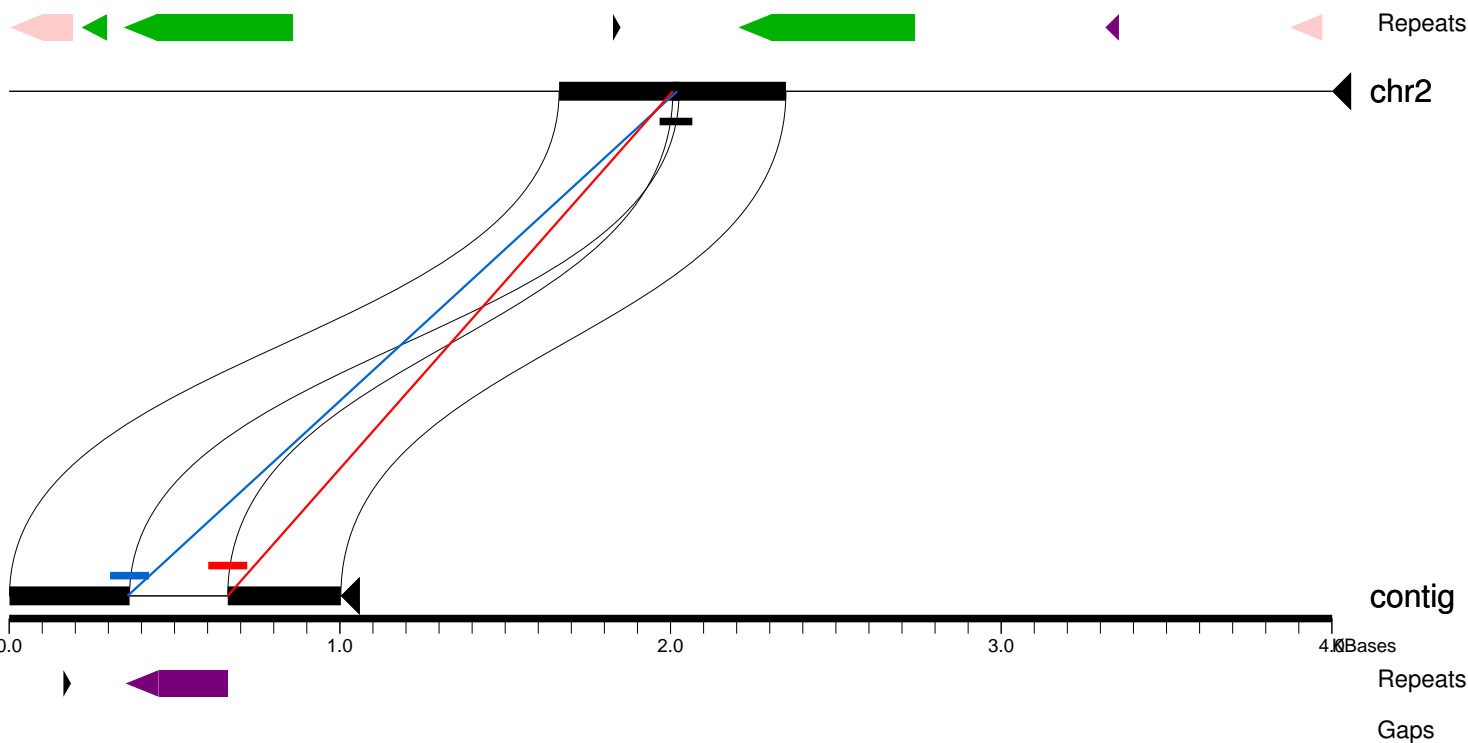

siteID: chr2\_117543044 Scafftig2 - Breakpoint: chr2:117543091  
chr2:117543048-117543150  
Overlap Length: 17 INS size: 258 Genotyped: No

```
left  GTAATCTGAAACCAGTTTT-ATCTAATGGC-TACTGAAAAAACCT-----GCTGAAACT  
chrom GTAATCTGAAACCAGTTTT-ATCTAATGGC-TACTGAAAAAACCT-----GCTGAAACT  
right TTAGCCGGGATG--GTCTCGATCTCCTGACCTCGTGATCCGCCCGCCTCGGCCTCCCAAAGGCTGAAACT  
1**11*1*1*1111**1*11****11**1*1*11***11111**11111111111111111111*****
```

```
left  CTTAAGACNNNNNNNNNNNNNNNNNNNNNNNNNNNNNNNNNNNNNNNNNNNNNNNNNNNNNNNNNNNNNN  
chrom CTTAAGACTAGTTTTATTCAGTCTGCTGTCCCTCACTAACCAGAGCTTGCCAG-----  
right CTTAAGACTAGTTTTATTCAGTCTGCTGTCCCTCACTAACCAGAGCTTGCCAG-----  
*****222222222222222222222222222222222222222222222222222222222222222222
```

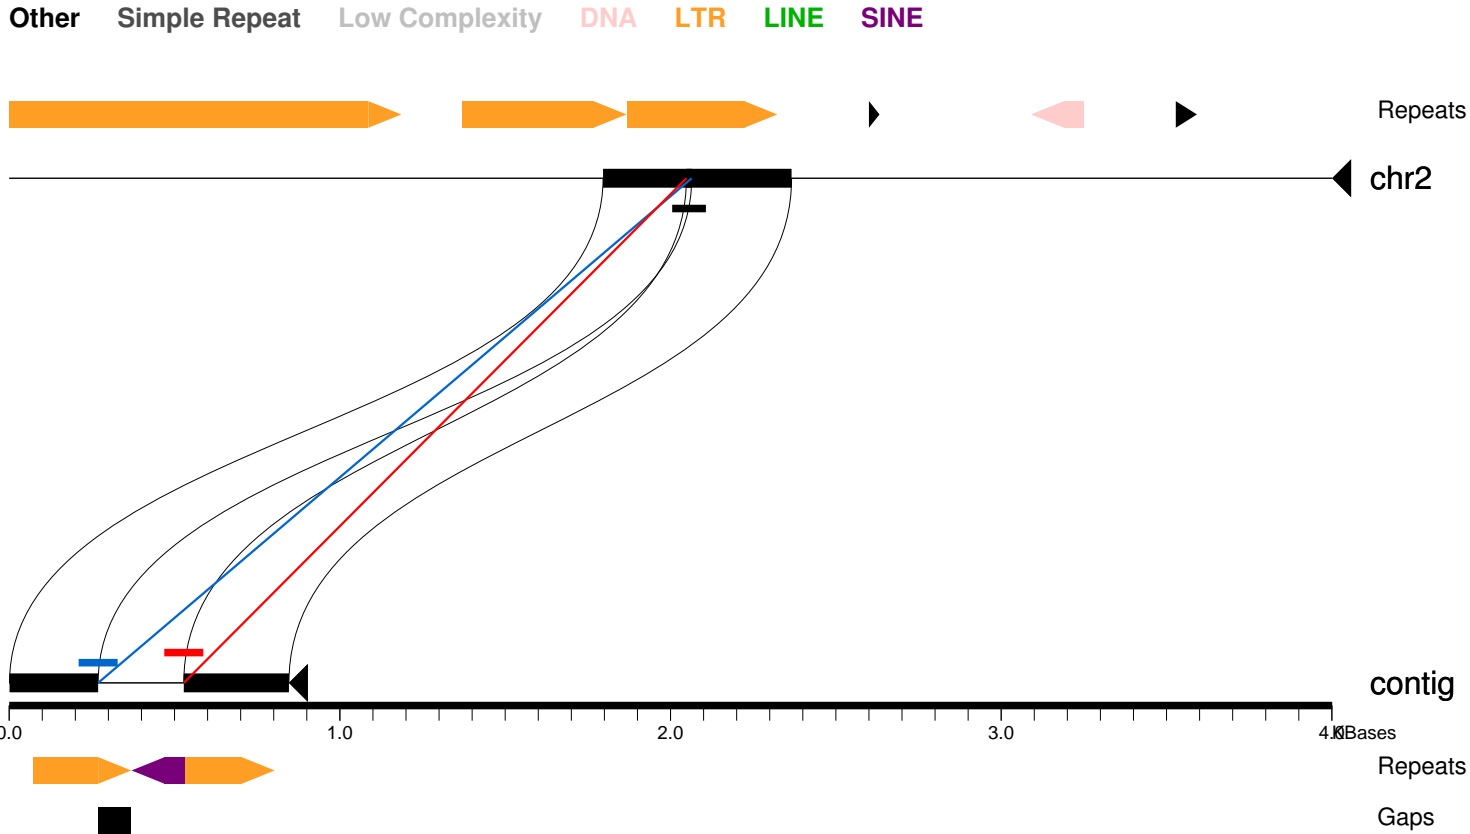

siteID: chr2\_119155732 Scafftig1 - Breakpoint: chr2:119155716

chr2:119155556-119155889

Overlap Length: 14 INS size: 329 Genotyped: Yes

```
left -----AGAGACACGATTTAGGGTATCTGGCAGAAGAAATTTCTAAGGAGCCAGCCTTCAAG
chrom GAACTTTGAACTTGAGAGACACGATTTAGGGTATCTGGCAGAAGAAATTTCTAAGGAGCCAGCCTTCAAG
right CG----TGAACCCGGGAAGCG-GAGCTTG-----CAGTGAGCCGAGATTGCGCCACTGC-AGTCCGCAG-
NN      22222NN21**11*11**11*1*11111*1*11**11**1***1*111111**1**1*11**11
```

```
left ATGTGACTTGGGTG-CTGTTAAAGGCATTCAGTTTTATAAGGGAAGCAGAGCATCAAAGTTCAGAAAATF
chrom ATGTGACTTGGGTG-CTGTTAAAGGCATTCAGTTTTATAAGGGAAGCAGAGCATCAAAGTTCAGAAAATF
right -TCCGGCCTGGGCGACAGAGCGAGAC--TCCGTCTCAAAAAAAAAAAAAAAAAAAAAAAAAAAAAAAAAA
1*11*1*1***1*1*1*1111**1*11**1**1*1*1**111**11*1*11*11***1111*1***11
```

```
left TGCAGCCTGACAGTGTGATAGAAAAGAAACACTCAGGCCGGGCGCGGTGGCTCACGCCTGT-----AA
chrom TGCAGCCTGACAGTGTGATAGAAAAGAAACACTCATTTTTCTGAGGTGAAATTCAGCCTGCTGTAGAAAT
right -----AAA-----AAAAAAAAGAAATACTCATTTTTCTGAGGTGAAATTCAGCCTGCTGTAGAAAT
1111111111*1*111111*1*1*1*****1*****222222*2*22*2222***2*****22222222*2
```

```
left TCCCAGCACT--TTGGGAGGCCGAGGCGGGT-----GGATCATGAGGTCAGGAGATC---G
chrom TTGCATAAGTAGTGAGGAGTCCAATGTTAATCCCCAAGACAATAGGGAAAAATAACTCCAGGGCATGTCAG
right TTGCATAAGTAGTGAGGAGTCCAATGTTAATCCCCAAGACAATAGGGAAAAATAACTCCAGGGCATGTCAG
*22*22*2*22*22***2*2*2*2222*22222222222222***22*2*222***22*2222*
```

```
left AGACCATCCTGGCTAACAAGGTGAAACCCCGTCTC-----TACTAAA
chrom AGGTCTTCATGGC-----AGATGGCAGCCCTCTCATCACAGGCCCGGAGGCCTAGAAAGT
right AGGTCTTCATGGC-----AGATGGCAGCCCTCTC-----
**22*2*2*2***22222**2*22*2***2***                                     11NN1NN
```

Other Simple Repeat Low Complexity DNA LTR LINE SINE

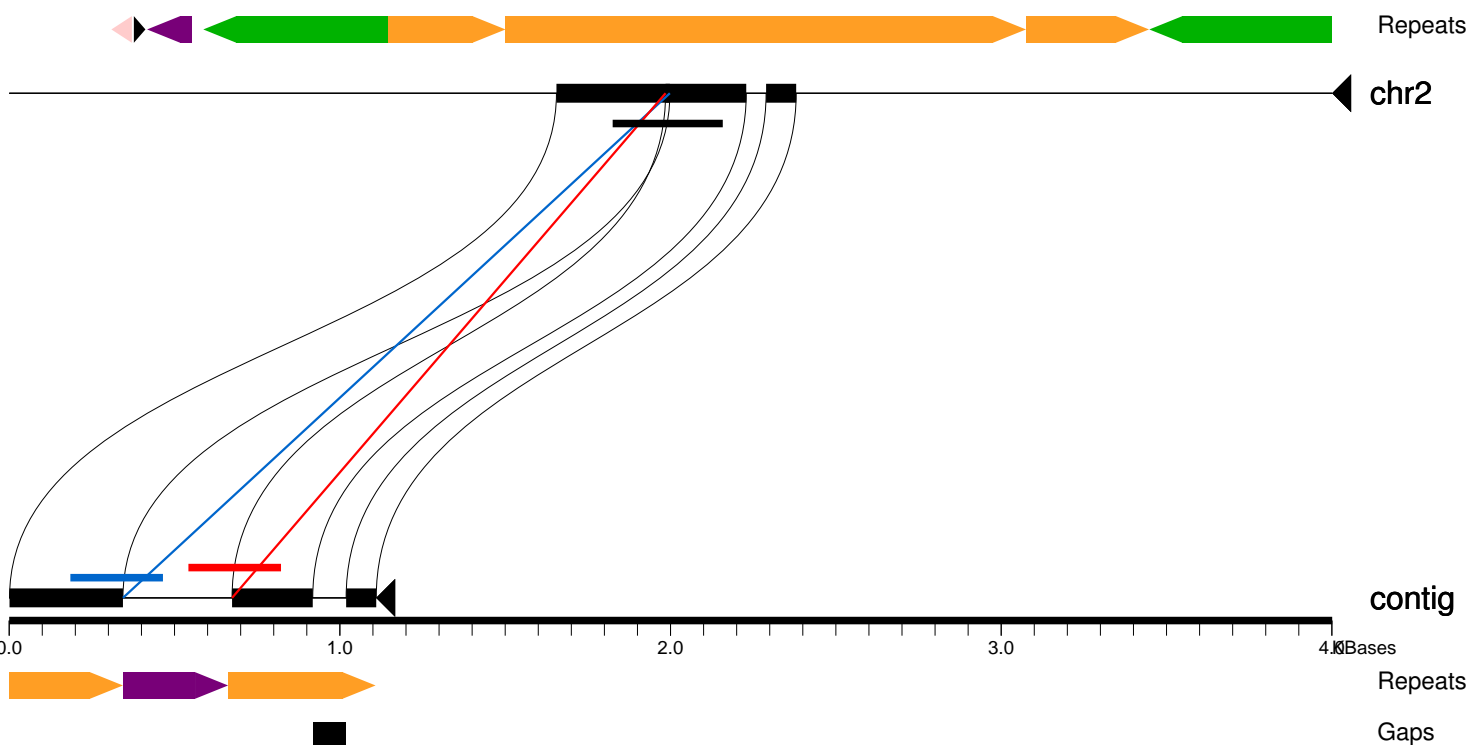

siteID: chr2\_1194869 Scafftig4 - Breakpoint: chr2:1194853

chr2:1194806-1194898

Overlap Length: 13 INS size: 293 Genotyped: Yes

```
left AAA--AACCCCTCAATAAAAAAACT-----AG-----CAGACCTAA-----TCCAACAACAC
chrom AAA--AACCCCTCAATAAAAAAACT-----AG-----CAGACCTAA-----TCCAACAACAC
right GCAGTGAGCCGAGATCGTGCCACTGCACTCCAGGCTGGGCGACAGAGCGAGACTCCGTCTCAAAAAAAAAA
11*111*1**111**111111***1111111**111111111****1*1*111111111**1**1**1*1
```

```
left ATTAAAAAGGTAACACCGGCCGGGCGCGGTGGCTCACGCCTG--TAATCCCAGCACTTTGGGAGGCCGAGG
chrom ATTAAAAAGGTAACACACCAT-----CATCAAGCAAGATTCATCCCAGAGAT-----
right AAAAAAAAGGTAACACACCAT-----CATCAAGCAAGATTCATCCCAGAGAT-----
*11*****22*222222222222***2**22*22*2*****222*22222222222222
```

```
left CGGGCGG
chrom -----GG
right -----GG
22222**
```

Other Simple Repeat Low Complexity DNA LTR LINE SINE

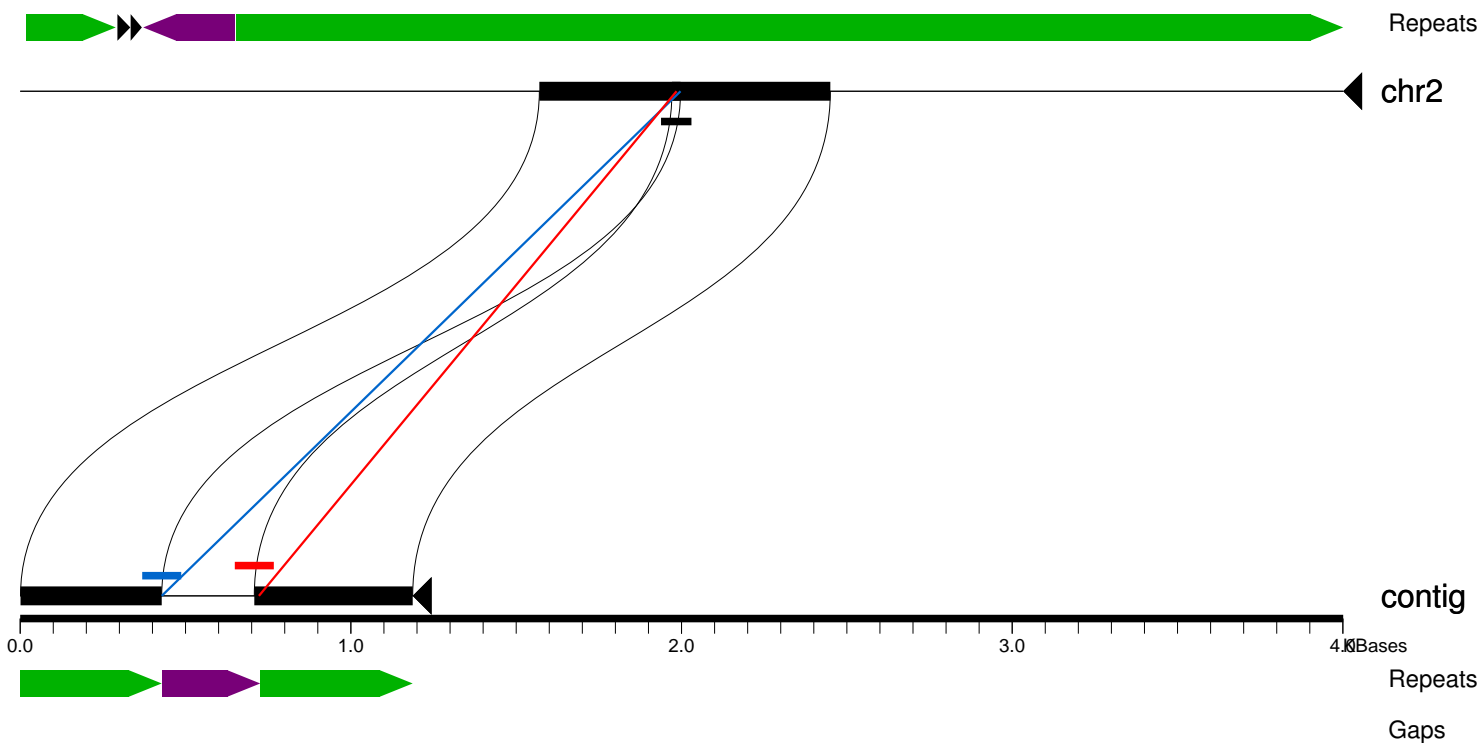

siteID: chr2\_119540388 Scafftig2 + Breakpoint: chr2:119540392  
 chr2:119540350-119540451  
 Overlap Length: 18 INS size: 316 Genotyped: Yes

```

left  -----AAAATTCTGTCC---AACAAAGAAATGTGTTAAGCAGGAATCTTTAAATAAAATAAA
chrom -----AAAATTCTGTCC---AACAAAGAAATGTGTTAAGCAGGAATCTTTAATAAAATAAA
right CTGGGCGACAGAGCGAGACTCCATCTCAAAAAAAAAAAAAAAAAAAAAAAAAAAAAAAAAAATAAAAAAAAA
11111111111111111111*1*1**11**1111**1***1***111111**11*11**111111***1***1***
left  AATAATCGCCGGGCGCGGTGGCTCACGCCTGTAATCCAGCACTTTGGGAGGCCGAGGCGGGCGGA
chrom AATAATCA-----GGCTCAG-----AATAAAGGAATAATAGGTAAAGAAAATATGCAAA
right AATAATCA-----GGCTCAG-----AATAAAGGAATAATAGGTAAAGAAAATATGCAAA
*****222222222222*****222222***2222*2*222*2**222222*222222**22*
  
```

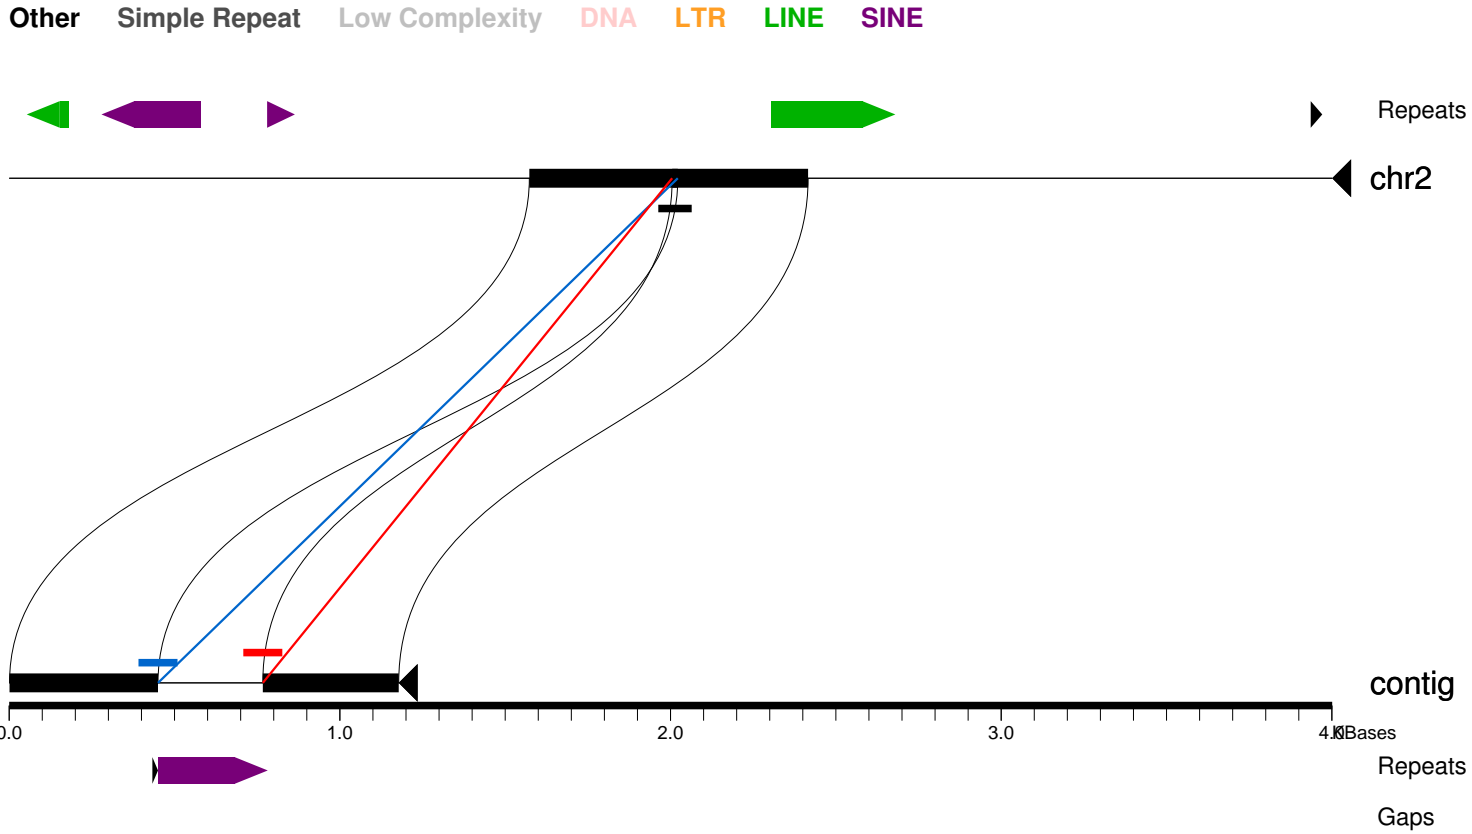

siteID: chr2\_123330657 Scaffitg8 - Breakpoint: chr2:123330649

chr2:123330602-123330705

Overlap Length: 13 INS size: 306 Genotyped: Yes

```
left  AGAGATAGACCCT---CTATCTGTGCAATGTTTCTTCTCATAATT-----AAGAAAAAT
chrom AGAGATAGACCCT---CTATCTGTGCAATGTTTCTTCTCATAATT-----AAGAAAAAT
right GCAC-TCCAGCCTGGGCGA-CAGAGCGAGACTCCGTCTCAAAAAAAAAAAAAAAAAAAAAAA
11*11*11*1***111*1*1*1*1*1*1*111*1*1***11*1**1111111111111111**1*****
```

```
left  CCACTGAGGCCGGGCGCGGTGGCTCACGCCTGTAATCCCAGCACTTTGGGAGGCCGAGGCGGGCGG
chrom CCACTGAATTCATGCCAGG-----AAGTCTGTCTGACC----CT----GATGCCTAC-CTTACTG
right CCACTGAATTCATGCCAGG-----AAGTCTGTCTGACC----CT----GATGCCTAC-CTTACTG
*****222*22**22**222222*2*2***2222**2222**2222**2***2*22*222*2*
```

Other Simple Repeat Low Complexity DNA LTR LINE SINE

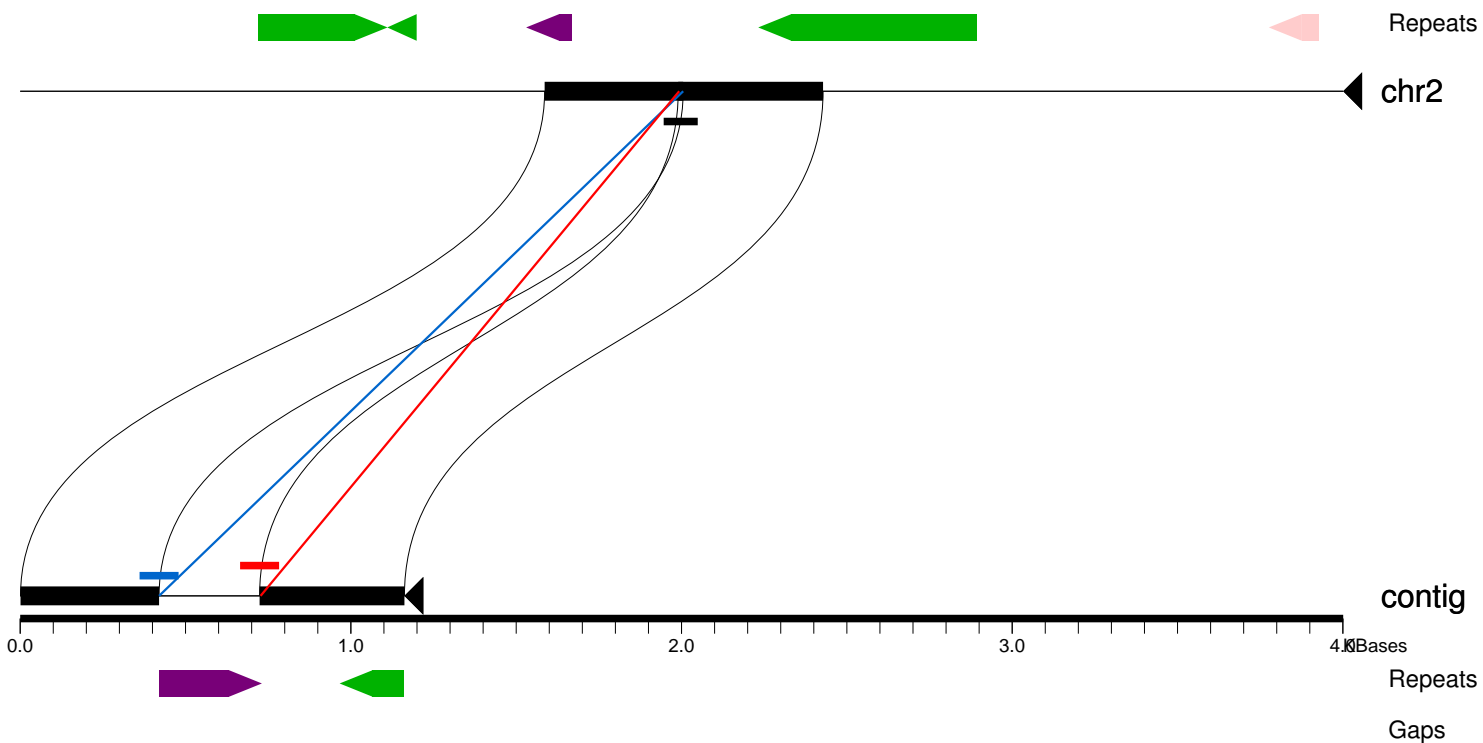

siteID: chr2\_124054915 Scafftig1 - Breakpoint: chr2:124054915  
 chr2:124054755-124055076  
 Overlap Length: 0 INS size: 327 Genotyped: No

```

left  NNNNNNNNNNNNNNNNNNNNNNNNNNNNNNNNNNNNNNNNNNNNNNNNNNNNNNNNNNNNNNNNNNNNNNNNNNNNNNNNNNNNNNNNNNNNNNNNN
chrom ACATTAACAATTCGGTTTTTCTCAGATTCGTTTTTTCATGTATTTTTCAGCATAGTGTTCACATTTCAA
right -----TTTAGTAGAGACGGGGTTTACCTTGTAGCCAGGATGGTCTCGA----TCTC
NNNNNNNNNNNNNNNNNN222NNN222NN222NN2222NN2NN222N222N22N2NN2NNNN22NN

left  NNNNNNNNNNNNNNNNNNNNNNNNNNGCTCCCCAAAAAAGGTTTAATTTAGCCAAGAAAAC TTAGTTGG
chrom TTTATTCTATGATAAAGATTAATAT-GCTCTCCAAAAAAGGTATAATCTAGCCAAGAAAAC TTCAGTAGG
right CTGACCTCATGATCCACCCGCTCG-GC-CTCCCAAAGTGTGGGAT-----TACAGGCGT
N2N2NNNN22222NN2NNNNNN2NN2**1*2**1***11*1*N11**N11111111111111*12**1N*1

left  TTGAATTTTAGAAAAGCTAGATT-----TTTTTTTTTTTTTTTTTTTT-----TTTTTTTTTTTTTTTTTTTTTTTTTTTTTTTTTTTT
chrom TAGAATTTTCAGAAAAGCTAGATTGAGCTTTATTTTTAAAAAGCACTAAATTTCTGTGGTATGGCCCTTAAAG
right GAGC----CACCGCGCCCGGCCGAGCTTTATTTTTAAAAAGCACTAAATTTCTGTGGTATGGCCCTTAAAG
12*1111112*1111**11*1112222***2***22222222222222*2*2*22*2*22222*2222

left  GAGACGGAGTCTTGCTCTGTCGCCAGCCGGACT---GC--GGAC-----TGCAGTGGC---GCAATC
chrom GAAATAGAATAATGACAACAAACAGAGAGATCAATATAGCTAGGAGCCTTTATGTAGTAGATGGGAAAT
right GAAATAGAATAATGACAACAAACAGAGAGATCAATATAGCTAGGAGCCTTTATGTAGTAGATGGGAAAT
**2*22*2*22*22222222*22**22222*2*222**22***22222222*2***2*2222*2***2

left  TCG-GCTCACT-----GCA-AGCTCTCT-GCTTC-----
chrom ACATGTTTTGTATTTAGCATATATTTATTTGATTGCCAGCTAGA
right ACATGTTTTGTATTTAGCATATATTTATTTGATTGCCAGCTAG-
2*22*2*222*22222***2*22*2*2*2*2**22222222
  
```

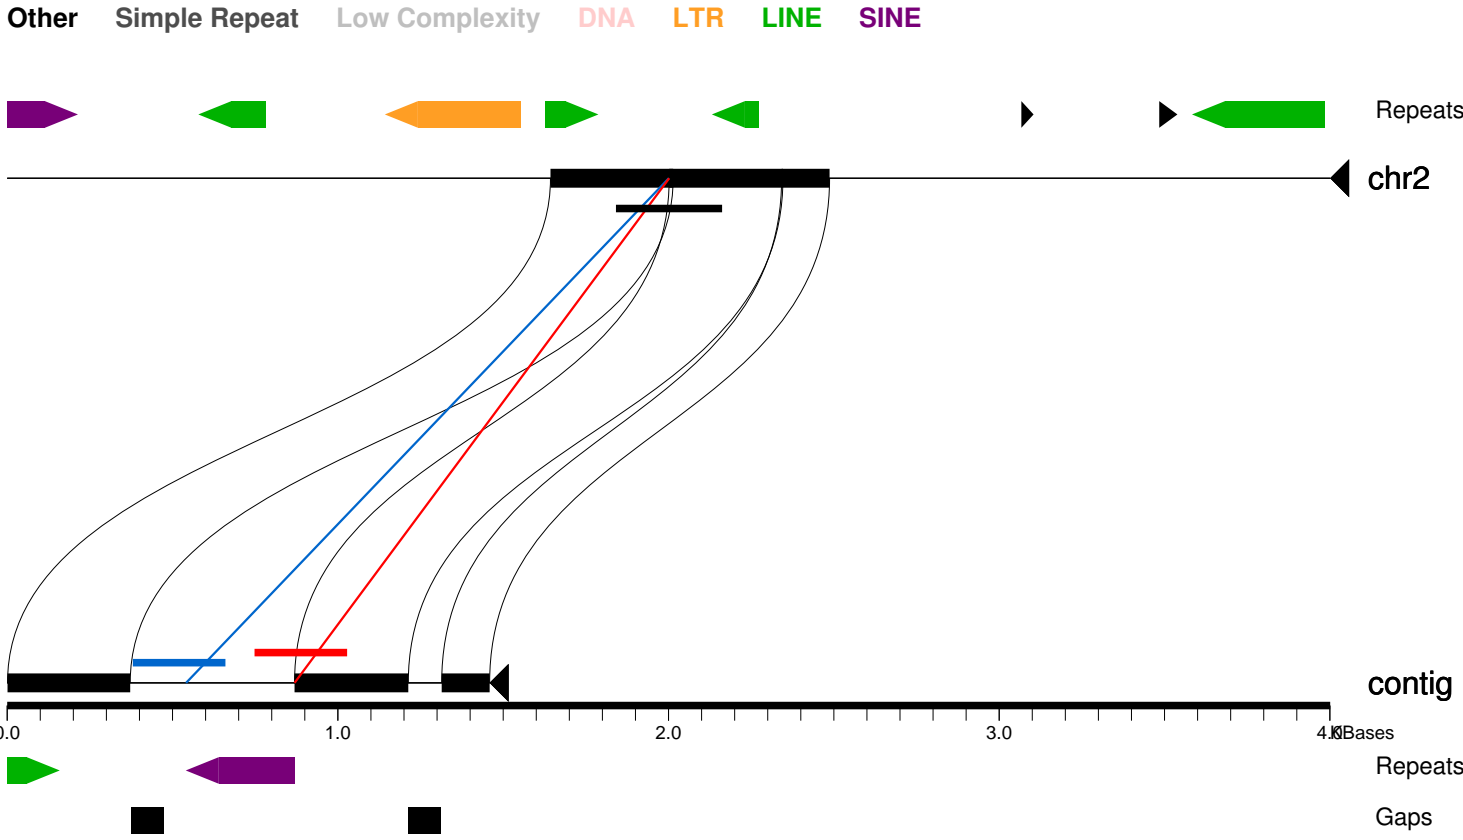

siteID: chr2\_126051117 Scaffitg1 - Breakpoint: chr2:126051094

chr2:126051045-126051153

Overlap Length: 11 INS size: 416 Genotyped: No

```

left  CCTCACA--TAGTCCTG---ACCTTCTTTTAATACATATATTAGCT-----GCCAGTAATAGCCAATTCT
chrom CCTCACA--TAGTCCTG---ACCTTCTTTTAATACATATATTAGCT-----TCCAGTAAAGCCAATTCT
right CCGCCCGCCTCGGCCTCCCAAAGTGCTGGGATTACAGGCGTGAGCCACCGCGCCCGGCCTAGCCAATTCT
      **1*1*111*1*1***1111*11*1**111*1****1111*1***111111N**1*111*****

```

```

left  NNNNNNNNNNNNNNNNNNNNNNNNNNNNNNNNNNNNNNNNNNNNNNNNNNNNNNNNNNNNNNNNNNNNN
chrom TTAAAAAAATTTTAAATTAGTGAGTGTGGTGGTTAATATTGACTGTCAA-----
right TTAAAAAAATTTTAAATTAGTGAGTGTGGTGGTTAATATTGACTGTCAA-----
      22222222222222222222222222222222222222222222222222222222222222222222

```

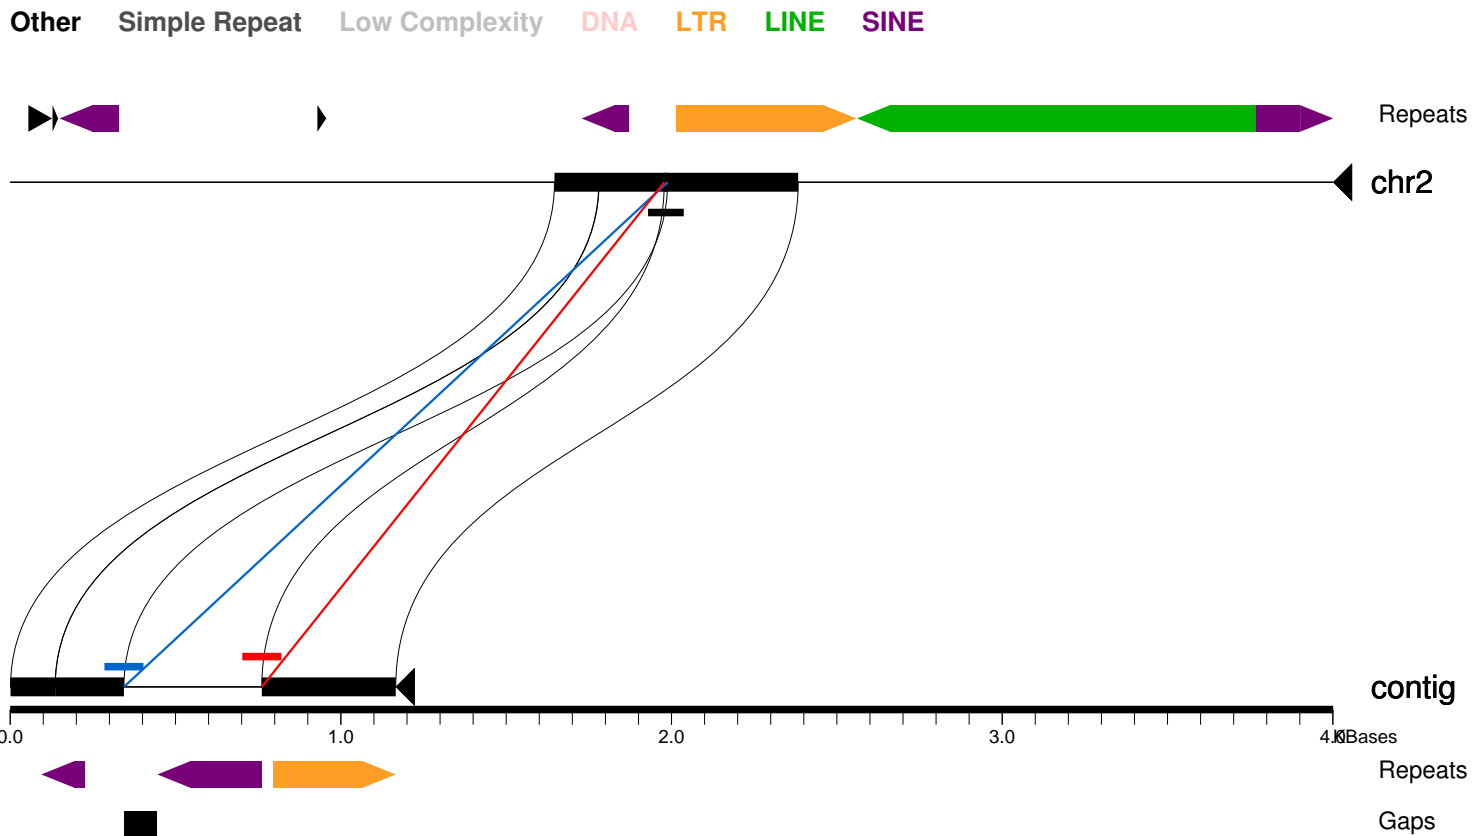



siteID: chr2\_126128738 Scaffitg1 + Breakpoint: chr2:126128730

chr2:126128570-126128912

Overlap Length: 23 INS size: 420 Genotyped: No

```
left  -----TGAATAACCAGTAAGCTAAGTATACATAAATTACTTCTACCGCTGTGG
chrom GTGTTTCTCTTAATACTTTTCATTGAATAACCAGTAAGCTAAGTATACATAAATTACTTCTACCGCTGTGG
right NNNNNNNNNNNNAA-----
      NNNNNNNNNNN22          111111111111111111111111111111111111111111111111111111111
```

```
left  ACGAGATAATTTAAACATCTTTGAGTTTAAATCTCTTCAGTTGAACCTGAAAAACAGACTTAATTATAAT
chrom ACGAGATAATTTAAACATCTTTGAGTTTAAATCTCTTCAGTTGAACCTGAAAAACAGACTTAATTATAAT
right -----
      111111111111111111111111111111111111111111111111111111111111111111111
```

```
left  TTCATCTAATGGTTAAGAAGAAAAAATTTAAAAGTGTGTTGTAG-----GCCGGGCGCG
chrom TTCATCTAATGGTTAAGAAGAAAAAATTTAAAAGTGTGTTGTAAATATACCTATTACATAGTATAGAGCA
right -----AAA#####--AAAAGTGTGTTGTAATATACCTATTACATAGTATAGAGCA
      1111111111111111111111***1*****11*****222222222222222222*2222*2*2
```

```
left  GTGG-CTCACGCCGTGTAATC-CCAGCACTTTGGGAGGCCGAGGCGGCC-----GGATCACGAGG-T
chrom TTGTACAAACTCAGTTAATGACCTGATCATTTTCCTTCCCACATAAGCCCCATATAAGCATCATTTGGCT
right TTGTACAAACTCAGTTAATGACCTGATCATTTTCCTTCCCACATAAGCCCCATATAAGCATCATTTGGCT
      2**22*22**2*222****22**2*22*2**222222**2*22222**222222222*2****222**2*
```

```
left  CAGGAGATC---GAGACCATCCCG--GCTAAAACGGTGAACCCCGTCTCT--ACTGAA---
chrom GCAGAGATTCCTTGTAACTATACAAAAGATGGAAGAGTTAAGGGCTGAATCAGAAAAATAATTT
right GCAGAGAT-----
      222****N      1NN11N11N1NN 1N1NN11NN11N11NNN1N1NN11N 1NNN11
```

Other Simple Repeat Low Complexity DNA LTR LINE SINE

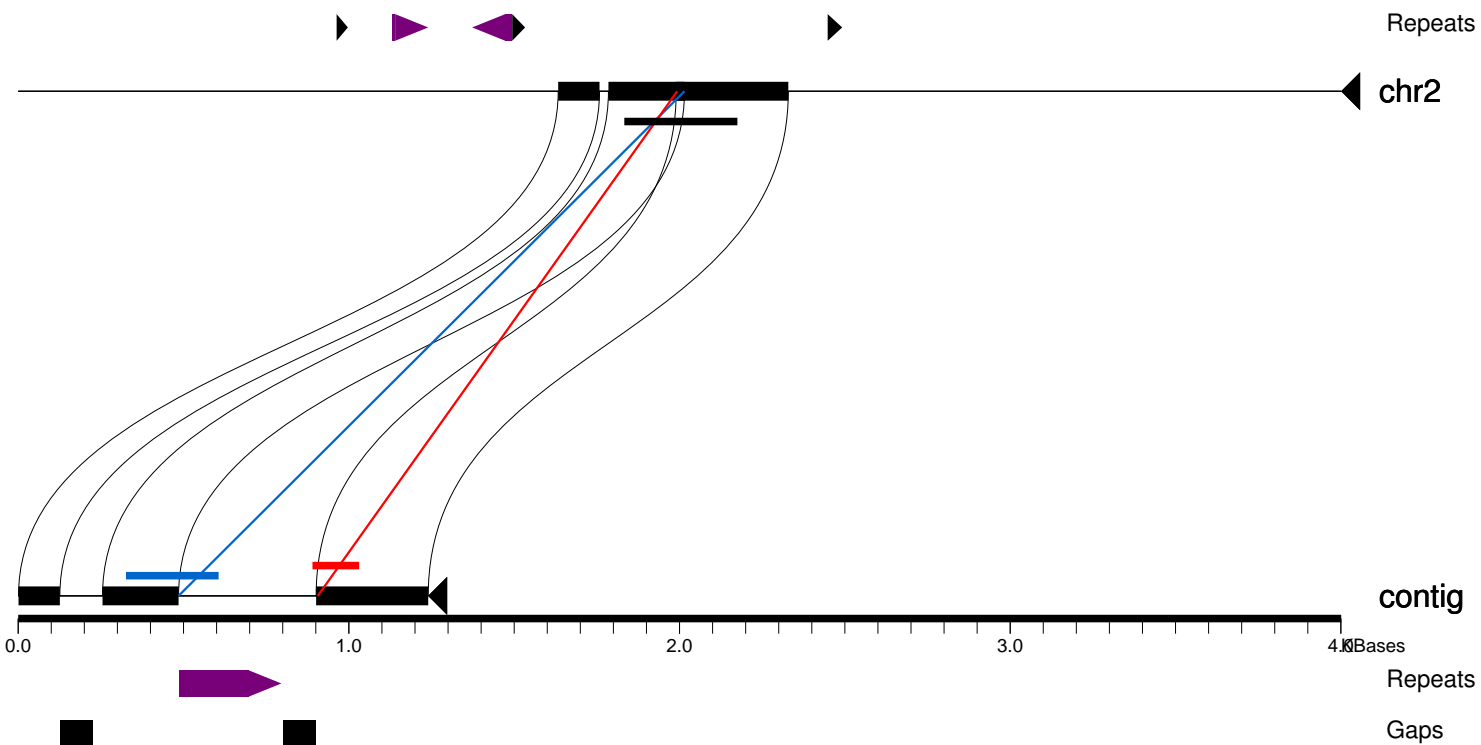

siteID: chr2\_128638892 Scafftig2 + Breakpoint: chr2:128638893

chr2:128638845-128638952

Overlap Length: 12 INS size: 467 Genotyped: No

```
left  AATACAAACTATTTCTCATACTGCTAGTATTTACA-----AACCAGGTATT-----GAGACTGCTA
chrom AATACAAACTATTTCTCATACTGCTAGTATTTACA-----AACCAGGTATT-----GAGACTGCTA
right CCGCCCGCCTCGGCCTCCCAAAGTGCTGGGATT-ACAGGCGTGAGCCACCGCGCCCGGCCGAGACTGCTA
      1111*111**1111***11*1*1***1*1***1***111111*1***1111111111111******
```

```
left  TT-----TTNNNNNNNNNNNNNNNNNNNNNNNNNNNNNNNNNNNNNNNNNNNNNNNNNNNNNNNNNNNNNN
chrom TT-----GACACAAAGATGTGATGATGCCCCCACTCATGTGTCTGGCTGGGCAAA
right TT-----GACACAAAGATGTGATGATGCCCCCACTCATGTGTCTGGCTGGGCAAA
      **22222222222222222222222222222222222222222222222222222222222222222222
```

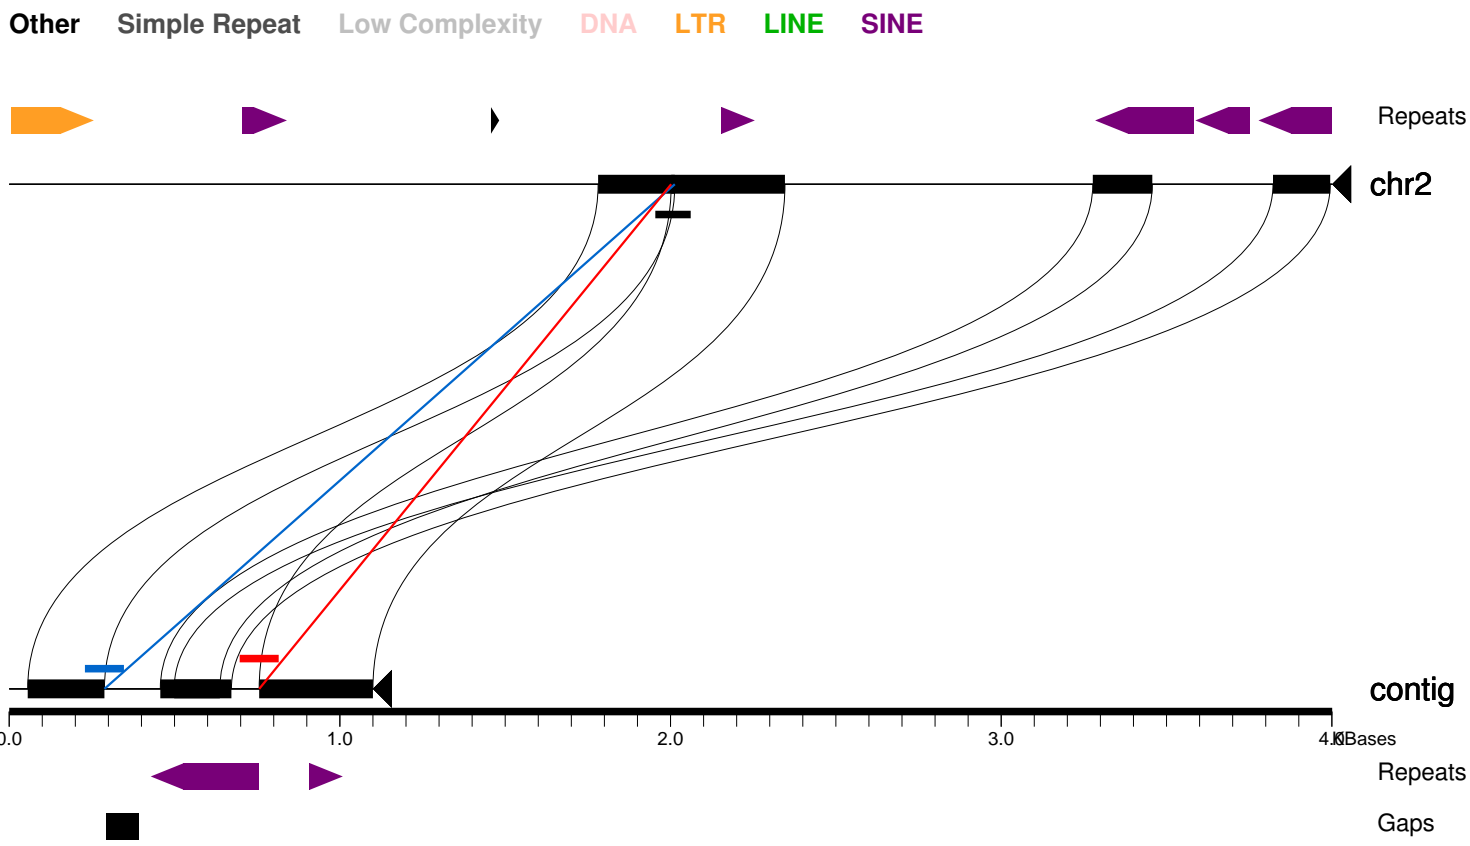

siteID: chr2\_130299825 Scaffitig1 + Breakpoint: chr2:130299827

chr2:130299768-130299886

Overlap Length: 1 INS size: 278 Genotyped: No

```

left  AAGAAAACAACCAGAAGCTGTTAGAACCAATATCGTAAGAGCTCTTAAAAACAACAGGGGGCCGGGCGC
chrom AAGAAAACAACCAGAAGCTGTTAGAACCAATATCGTAAGAGCTCTTAAAAACAATCAGGGCTTATAGCAC
right NNNNNNNNNNNNNNNNNNNNNNNNNNNNNNNNNNNNNNNNNNNNNNNNNNNNNNNNNNNNNNNNNNNNNNN
      111111111111111111111111111111111111111111111111111111111111111111111111
      *22N222**2*

```

```

left  GGTGGCTCACGCCTGTAATCCCAGCACTTTGGGAGGCCGAGGCGGGCG---G
chrom CCAAGCAAACACC--CAATCA-AGAAAAAGCTATCTCCAAAATGGCAAAG
right CCAAGCAAACACC--CAATCA-AGAAAAAGCTATCTCCAAAATGGCAAAG
      2222**22**2**222*****22**2*2222*22*222*2*2222***2222*

```

Other Simple Repeat Low Complexity DNA LTR LINE SINE

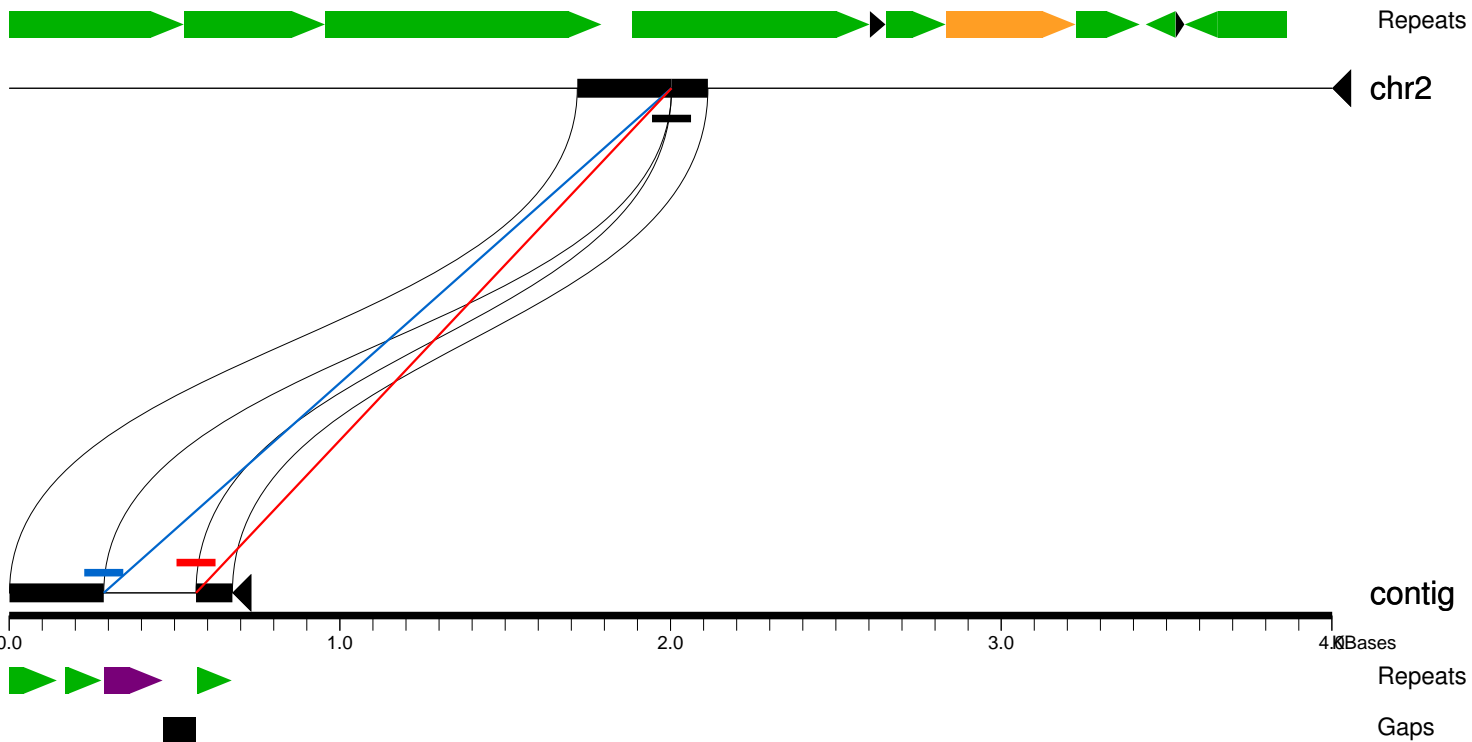

siteID: chr2\_13076585 Scaffitg1 + Breakpoint: chr2:13076573  
 chr2:13076413-13076748  
 Overlap Length: 16 INS size: 274 Genotyped: Yes

```

left  -----TACTGTCC TAGGCGTTTCAAACAGATTATCTGAAACTCATTTTCATTTCTCACA
chrom G----ATTCTGTGACACATACTGTCCTAGGCGTTTCAAACAGATTATCTGAAACTCATTTTCATTTCTCACA
right GGAGAAATGGCGTGAACC---CGGG---AGGCGGAGCTTGACAG-TGAGCCGAGA-TCCCGCCACTG-CAC-
      2111122NNN2222NN2  11*1*1111*****111*111***1*1*1*1*1*1*1*1*1*1*1*1111*1*11***1

left  TCAAAC TTGCATGGCACATATTATCCAAGTTTTTATAGATACAGGAACTGAGGATCAAAGAGGCTAAGTAA
chrom TCAAAC TTGCATGGCACATATTATCCAAGTTTTTATAGATACAGGAACTGAGGATCAAAGAGGCTAAGTAA
right TCCAGCCTG---GGCG-----ACAGAGCGAG--ACTCCGTCTCAAAAAAAAAAAAAAAAAAAAA
      **1*1*1**111***1111111111111111111*1***111*11***11*11*****1*1111*11**

left  AATGACCAAGATCATGTACCTTTTAAAGAGGCTGGTGTGAGC----ACTTTGGGAGGCCGAGGC----GGG
chrom AATGACCAAGATCATGTACCTTTTAAAGAGGCTGGTGTGAGCATTGTGACCTCAGGCCTGCTGGGTATCAGAG
right AAAAAAAAAAAAA---AAGAGGCTGGTGTGAGATTTGACCTCAGGCCTGCTGGGTATCAGAG
      **11*11**1*1111111111111111*22222**2*22**2222*22**22222*2*

left  CGGATCACGAGGT-----CAAGAGATCG----AGACCATCCCGCTAAAACGGTGAACCCCG
chrom CCTATTTTGAGTTTTTGTTCCTTACAACCTGTTCCCATATAAATACTG--TTAGAAGGACACACACAC
right CCTATTTTGAGTTTTTGTTCCTTACAACCTGTTCCCATATAAATACTG--TTAGAAGGACACACACAC
      *22**222***2*22222222222***22*2**22222*2*22**2*2*22*2*2*22*2**2*2*22

left  TCTCTACTAAAAATACAAAAAAT-----TAGCCGGGCG-----TAGTGGCGG----
chrom ACACACACACACACACACACACACACTGCCCTATAGTTGCACACTGCAATACTTGCTTAGCT
right ACACACACACACACACACACACAC-----TGCCCTATAGTTGCACACTGCAATAC-----
      2*2*2222*2*2*2**2*2*21N  2222222***22*22*222222**21N11NN
  
```

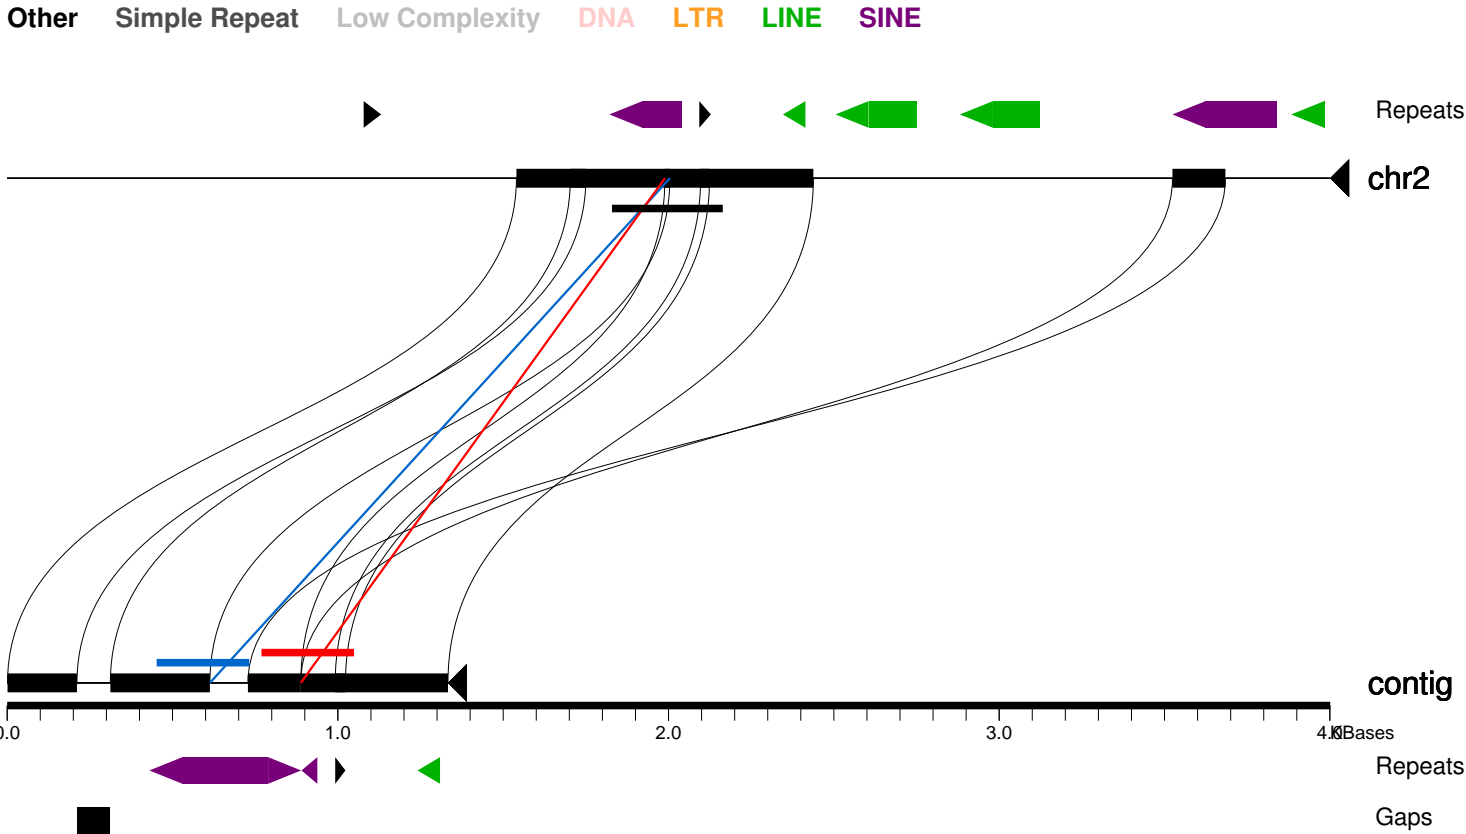

siteID: chr2\_133916493 Scaffoldig1 - Breakpoint: chr2:133916493

chr2:133916448-133916552

Overlap Length: 15 INS size: 428 Genotyped: No

```

left   GGGAGAGGGAATAAAGAAGAAATACAATGCATGGCTTGTGCTCTT-----AAGAACTACAG
chrom  GGGAGAGGGAATAAAGAAGAAATACAATGCATGGCTTGTGCTCTT-----AAGGGCTACAG
right  NNNNNNNNNNNNNNNNNNNNNNNNNNNNNNNNNNNNNNNNNNNNNNNNNNNNNNNNNNNNNNNNNN
111111111111111111111111111111111111111111111111111111111111111111
***N2*****

```

```

left   TAGAGGCCGGCGCGGTGGCTCACGCCTGTAATCCACACTTTGGGAGGCCGAGGCGGGCGG
chrom  TAGATA----GAACAACAGCCTACCAAAGTTGTCCACACCCTA----ATCCCTAGAA----
right  TAGATA----GAACAACAGCCTACCAAAGTTGTCCACACCCTA----ATCCCTAGAA----
***222222*22*2222*22**2222**22***222*2**2222*22**2**22222222

```

Other Simple Repeat Low Complexity DNA LTR LINE SINE

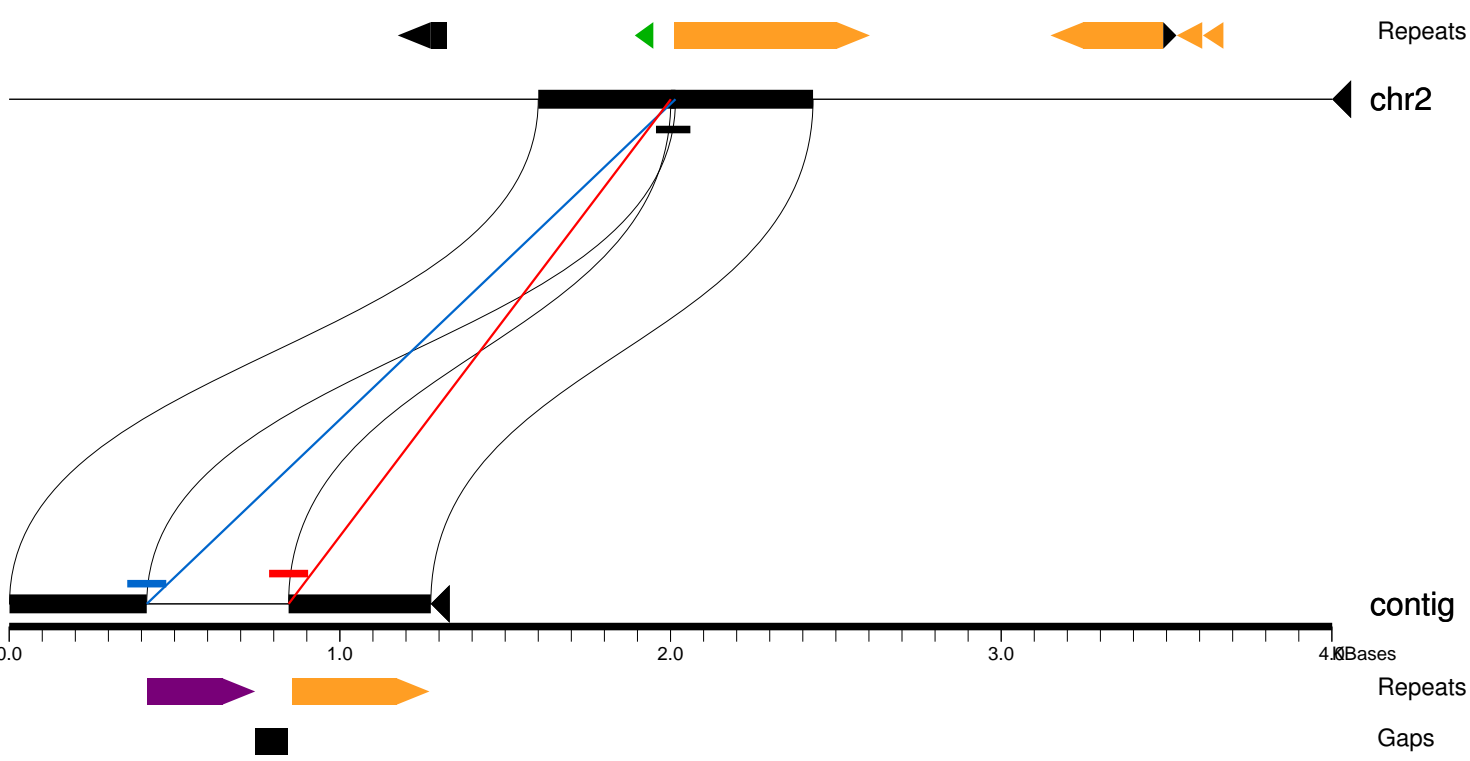

siteID: chr2\_136879046 Scafftig1 - Breakpoint: chr2:136879051

chr2:136879006-136879110

Overlap Length: 15 INS size: 472 Genotyped: No

```

left    TGAGTATATGTCATACTCCTATCCCTCCAATATTTTAGGTTTCCTT-----AAAGTGAATGC
chrom   TGAGTATATGTCATACTCCTATCCCTCCAATATTTTAGGTTTCCTT-----AAAGTGAATGC
right   NNNNNNNNNNNNNNNNNNNNNNNNNNNNNNNNNNNNNNNNNNNNNNNNNNNNNNNNNNAAAAA
       1111111111111111111111111111111111111111111111111111111111111111
  
```

```

left    CCAGGCCGGGCGCGGTGGCTCACGCCTGTAATCCAGCACTTTGGGAGGCCGAGACGGGCGGA
chrom   CCAG-----ATATCCTCTATCCAGCTAGCCATTGCTGAACAAATACTGGGCTC
right   CCAG-----ATATCCTCTATCCAGCTAGCCATTGCTGAACAAATACTGGGCTC
       ***2222222222222222*22*22**2*2222*2***2*2***22222*22*2**2**2222
  
```

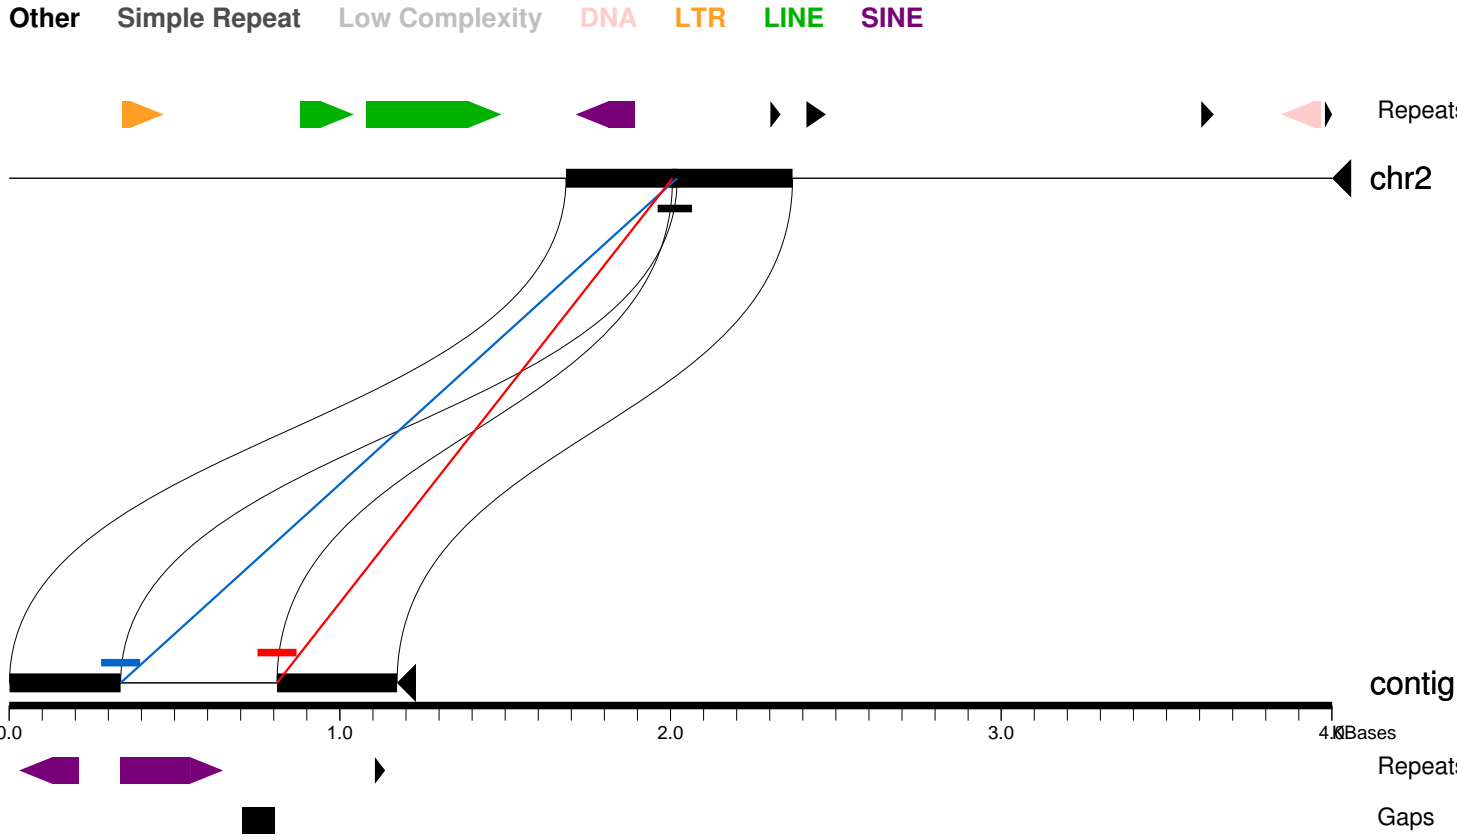

siteID: chr2\_138259787 Scaffitig1 + Breakpoint: chr2:138259793

chr2:138259739-138259852

Overlap Length: 3 INS size: 300 Genotyped: Yes

```
left   TTAT---TCTCCCACAATAAATATTCCTTCATTATAAATAGTTTTGAACTTCAA--TGGTTATTTTTTTTTT
chrom  TTAT---TCTCCCACAATAAATATTCCTTCATTATAAATAGTTTTGAACTTCAA--TGGTTATCTTAGTAA
right  CCGCCCGCCTCGGCCTCCCAAAGTGCTGGGATTACAGGCGTGAGCCACCGCGCCCGGCCATCTTAGTAA
      111111111***111*1111**11*1**111****1*111**11111**11*11111*11***2**22*22
```

```
left   TTTTTTTTTTTTGGAGACGGAGTCTCGCTCTGTCGCCAGGCTGGAGTGCAGTGGC---
chrom  AT-----TAGATACTAAGTCA-GGTTAGTAGTTAACTATGCAACATAAAATCCTTA
right  AT-----TAGATACTAAGTCA-GGTTAGTAGTTAACTATGCAACATAAAATCCTTA
      2*2222222*2**2**22****22*2*22**2*222*222**2*2222*2222*222
```

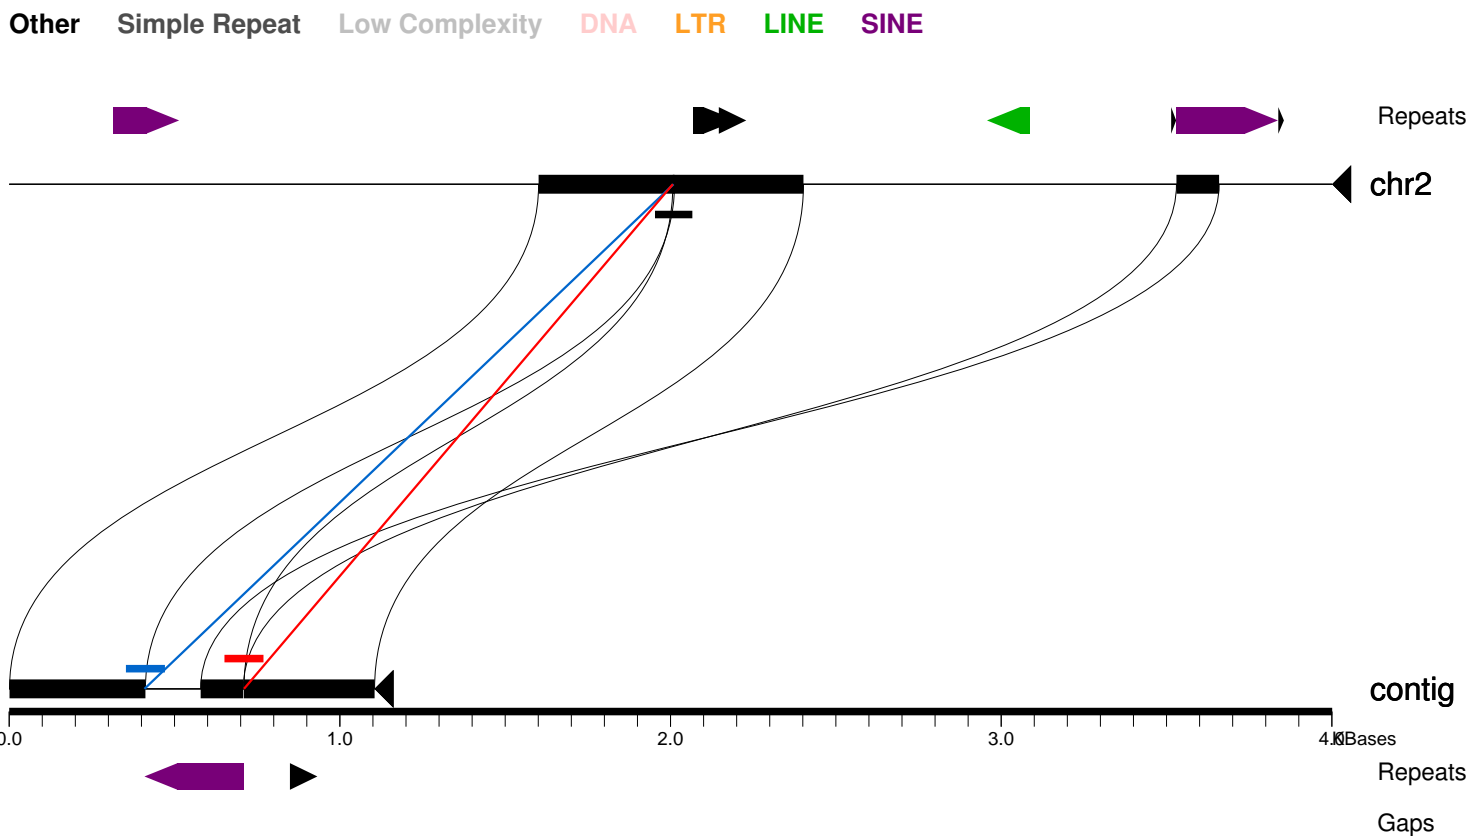

siteID: chr2\_139380785 Scafftig2 - Breakpoint: chr2:139380782

chr2:139380622-139380948

Overlap Length: 7 INS size: 304 Genotyped: Yes

left AA-----GACATGGATTTTACAGAAAATTCCTTATTTATCTGGTGCCTG--CCTGGGTCATGACTTTTG  
chrom AAAATAAAGACATGGATTTTACAGAAAATTCCTTATTTATCTGGTGCCTG--CCTGGGTCATGACTTTTG  
right GCAGGAGA---ATGGCGTGAACCCGAGAGGCGGAGCT-----TGCAGTGAGCCGAGATCCC GCCACT--  
112NN2N2111\*\*\*\*11\*11\*\*111\*1\*11\*11\*11\*111111\*\*\*\*1\*\*11\*\*11\*1\*\*11\*1\*11\*11

left TGCCTTACTTCCAGGGCCTGGATATTTAGAGGGACAGAGCCAGGGCAAGCTATCCTTTTTTCTATTCTGCC  
chrom TGCCTTACTTCCAGGGCCTGGATATTTAGAGGGACAGAGCCAGGGCAAGCTATCCTTTTTTCTATTCTGCC  
right -GC---ACT-CCAG--CCTGG-----GCGACAGAGCGAGAC-----TCCGTCTCAAAAAAAAAA  
1\*\*111\*\*\*1\*\*\*\*11\*\*\*\*\*1111111111\*1\*\*\*\*\*1\*\*1111111111\*\*\*1\*1\*111\*11111111

left TCTCTCTGTTTTTCATCAACAACAGCTCTGG----CCGGGCGCGGTGGCTCACGCCTGTAATCCCAGC---  
chrom TCTCTCTGTTTTTCATCAACAACAGCTCTGAATCTCTTAAGACAGTGGCTCTCAAACCTAGTTCCAAGGTTA  
right AAAAA-----AAAAAAAAAGCTCTGAATCTCTTAAGACAGTGGCTCTCAAACCTAGTTCCAAGGTTA  
1111111111111111\*11\*\*1\*\*1\*\*\*\*\*22222\*222222\*2\*\*\*\*\*2\*22222222\*\*\*2\*\*2222

left -----ACTTTGGGAGGCCGAGGCGGGTGGATCACG-----AGG----TCAGGAGATCGAG---A  
chrom AATTCTAACAGTGGCATGCATTTACATAAAAAATTAAGTTAATTTATAGAATTTTCAGAAACTAAAGTTTA  
right AATTCTAACAGTGGCATGCATTTACATAAAAAATTAAGTTAATTTATAGAATTTTCAGAAACTAAAGTTTA  
2222222\*22\*\*\*2\*2\*\*22222\*222222\*\*2\*2\*22222222\*\*22222\*\*\*\*2\*22\*22\*\*222\*

left CCATCC-----CGGCTAAAACGGTGAA----ACCCCGTCTCTACTAAA  
chrom CCTCCCAAAGTGCTTTTTTAAACTTTGATGTCTACCATTTGCTTGCCTGTC  
right CCTCCCAAAGTGCTTTTTTAAACTTTGATGTCTACCATTTGCTTG-----  
\*\*22\*\*222222\*222\*2\*\*\*\*22\*\*\*22222\*\*2222\*\*22N11NNN

Other Simple Repeat Low Complexity DNA LTR LINE SINE

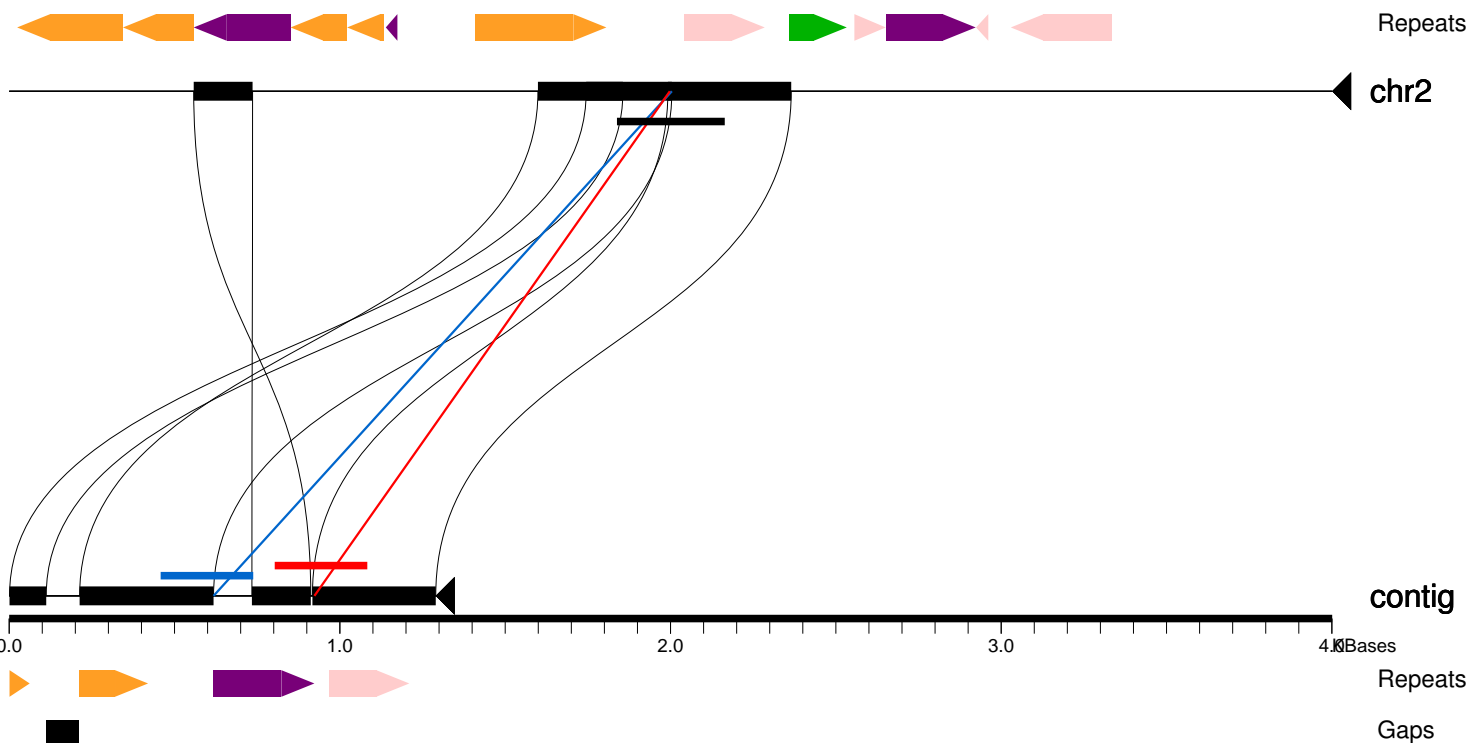



siteID: chr2\_141534051 Scafftig2 + Breakpoint: chr2:141534056

chr2:141534015-141534115

Overlap Length: 12 INS size: 319 Genotyped: Yes

```
left  A-----GACTCTTCAATTTAACTT--TTCTTTTTTC-----TTAGAAAAGAATA-----TATAATATTCT
chrom A-----GACTCTTCAATTTAACTT--TTCTTTTTTC-----TTAGAAAAGAATA-----TATAATATTCT
right CCACCCGCCTCGGCCTCCCAAAGTGCTGGGATTACAGGCGTGAGCCACCGCGCCCGGCCCTATAATATTCT
      1111111*1***11*111111**11*11*1111**1*111111*1**11*1111111111111*****
```

```
left  TTTTTTTTTTTTTTTTTTTTTTTTTTTTTTTTTTTGAGACGGAGTCTCGCTCTGTCGCCAGGCCGGACT-
chrom TATATTTTACATAACATGTAAGTATAT-----AGA-----TGTAATAAAAAGCGTATTT
right TATATTTTACATAACATGTAAGTATAT-----AGA-----TGTAATAAAAAGCATATTT
      *2*2***222*2222*2*222*2*2*222222***222222222222222***22222*222*12*2*2
```

Other Simple Repeat Low Complexity DNA LTR LINE SINE

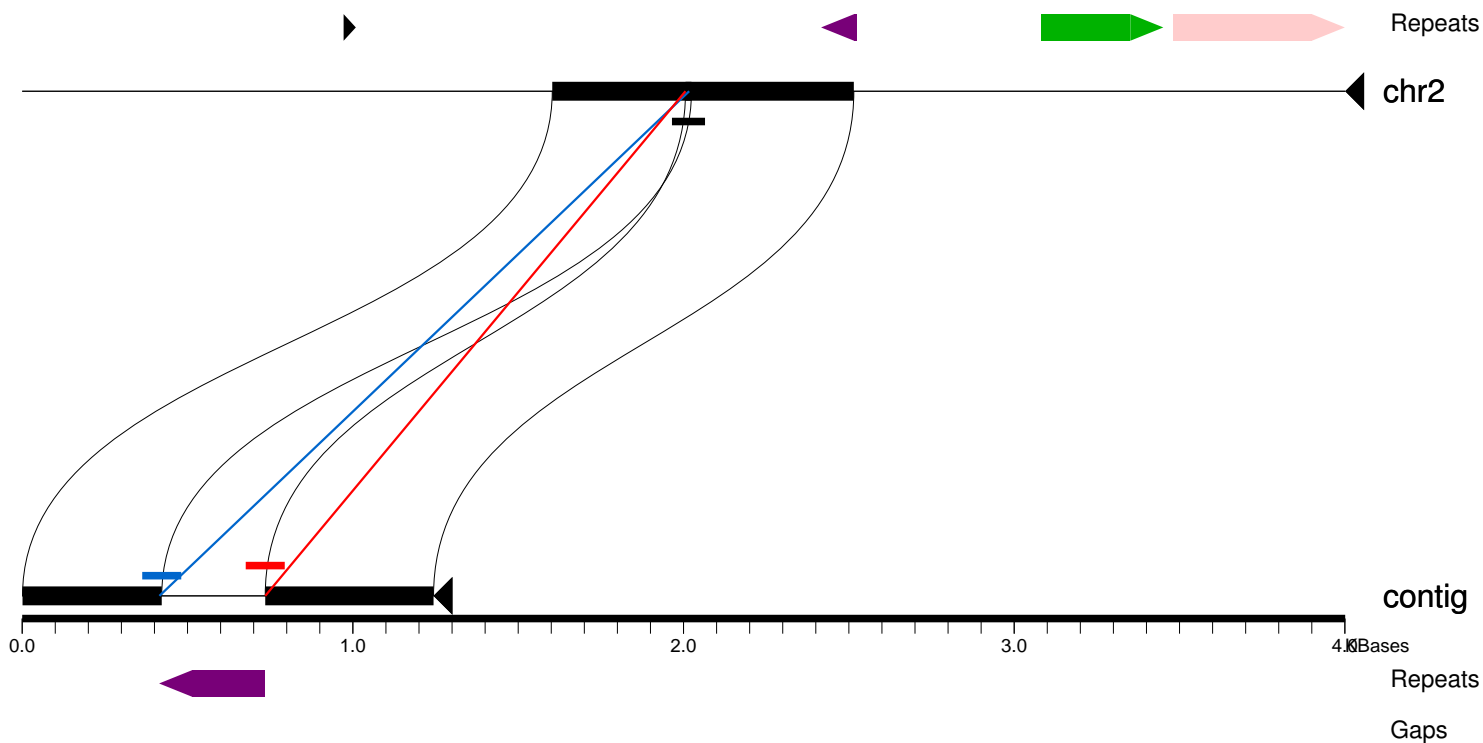

siteID: chr2\_142325350 Scaffitig8 - Breakpoint: chr2:142325354

chr2:142325301-142325413

Overlap Length: 7 INS size: 306 Genotyped: Yes

```
left  TGGGAAACTAA---ACAGACCTTAAATCTGG---ACTACTAAAGATTCACCTTGATTAGAATTTCTGGCC
chrom TGGGAAACTAA---ACAGACCTTAAATCTGG---ACTACTAAAGATTCACCTTGATTAGATTCTTA--
right CTCCAGCCTGGGCGACAGAGCGAGACTCCGTCTCAAAAAAAAAAAAAAAAAAAAAAAAAAAAAAAATTCTTA--
      1111*11**11111*****1*111*1**1*1111*11*11***1*111*11111*11*1*****2222
```

```
left  GGGCGCGGTGGCTCACGCCTGTAATCCCAGCACTTTGGGAGGCCGAGGCGGGCGG
chrom GGGTTAAATGTGGAAGGGCCCTAGGAAACCAATTTCTAATAC-AGGCTTA---
right GGGTTAAATGTGGAAGGGCCCTAGGAAACCAATTTCTAATAC-AGGCTTA---
      ***22222**2222*2*2*2222*2222*2**2***222*222*2***222222
```

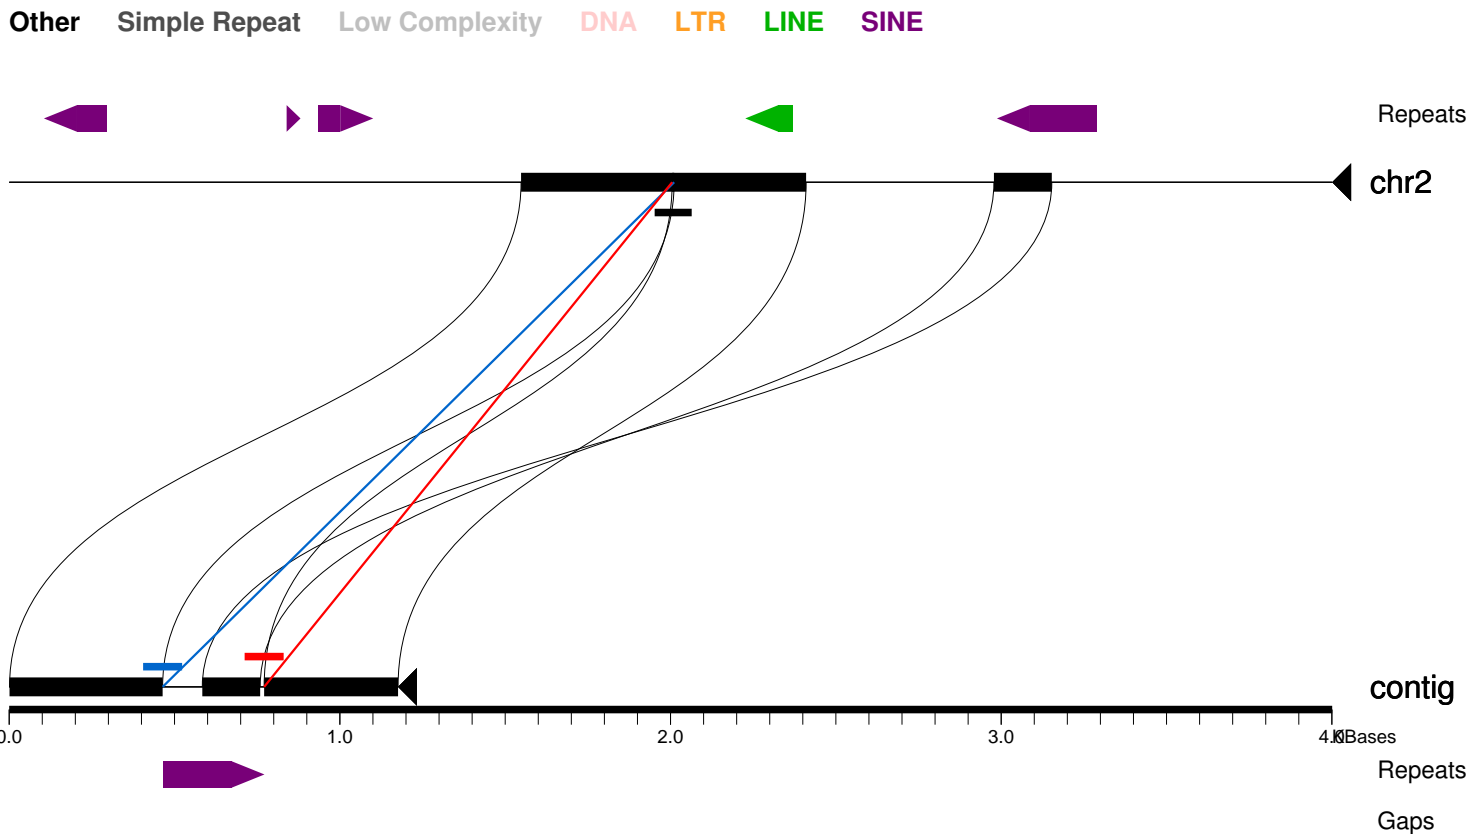

siteID: chr2\_1471717 Scaffitig1 + Breakpoint: chr2:1471715

chr2:1471672-1471774

Overlap Length: 17 INS size: 303 Genotyped: Yes

```
left  GATATTTTCCTGTTGGAC-----AAGGCCTTTTATCA-----TTATATAATGA-----CCCTCTTTGT
chrom GATATTTTCCTGTTGGAC-----AAGGCCTTTTATCA-----TTATATAATGA-----CCCTCTTTGT
right -ATCCACCCGCCTCGGCCTCCCAAAGTGCTGGGATTACAGGCGTGAGCCACCGCGCCCGGCCCCCTCTTTGT
      1**11111*111*1**1*11111***11**111**1*111111*1*111*11*1111111******
```

```
left  CTTTTTFTTTTTTTTTTTTTTTGAGACGGAGTCTCGCTCTGTCGCCAGGCGGGACTGCGGACTGCAG
chrom CTTTTTFAACCACTGTTGCTTTAA---AGTTTATTT-TGTCT-----GATATAAGAATA---
right CTTTTTFAACCACTGTTGCTTTAA---AGTTTATTT-TGTCT-----GATATAAGAATA---
      *****222222*2**22*222*222***2*222*2*****2222222222**22222*2*2222
```

Other Simple Repeat Low Complexity DNA LTR LINE SINE

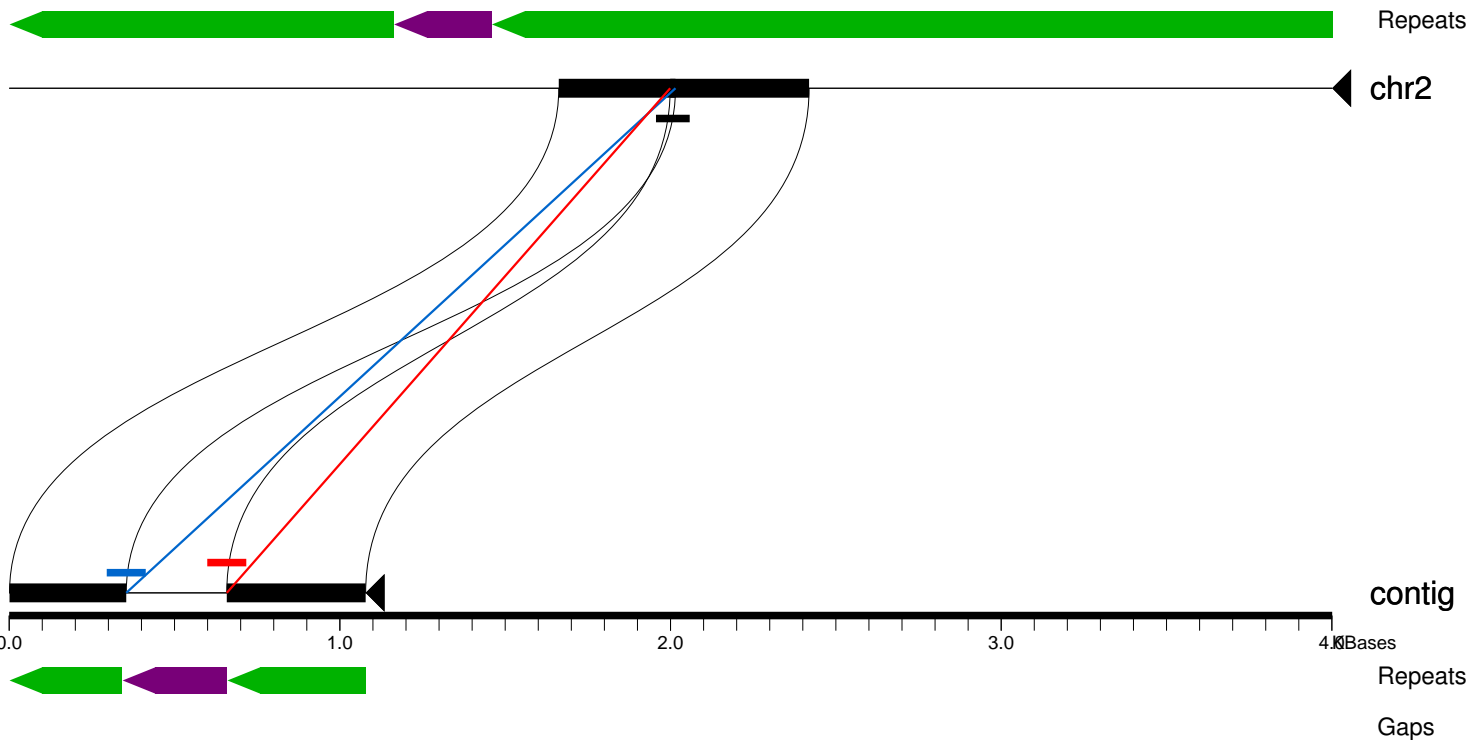

siteID: chr2\_150764255 Scafftig3 + Breakpoint: chr2:150764252

chr2:150764205-150764311

Overlap Length: 13 INS size: 427 Genotyped: No

```
left      GCCAACATTTATTTAGAAATGCTCTGTAGCTTAGAGTCAATTTCTCT-----ATAAGAACTTACA
chrom     GCCAACATTTATTTAGAAATGCTCTGTAGCTTAGAGTCAATTTCTCT-----ATAAGAACTTACA
right    NNNNNNNNNNNNNNNNNNNNNNNNNNNNNNNNNNNNNNNNNNNNNNNNNNNNNNNNNNNNNNNNAAGAACTTACA
         111111111111111111111111111111111111111111111111111111111111*1*****
```

```
left      TTGGCCGGGCGGGTGGCTCACGCCTGTAATCCCAGCACTTTGGGAGGCCGAGGCGGGTGG
chrom     TTAAT-----TTTGTAGATACAAATAATTAAGAATTAGCTTAATTTCAATTATT---
right    TTAAT-----TTTGTAGATACAAATAATTAAGAATTAGCTTAATTTCAATTATT---
         **222222222222*22222*22*222***222**2*2*22222*22222*222222222
```

Other   Simple Repeat   Low Complexity   DNA   LTR   LINE   SINE

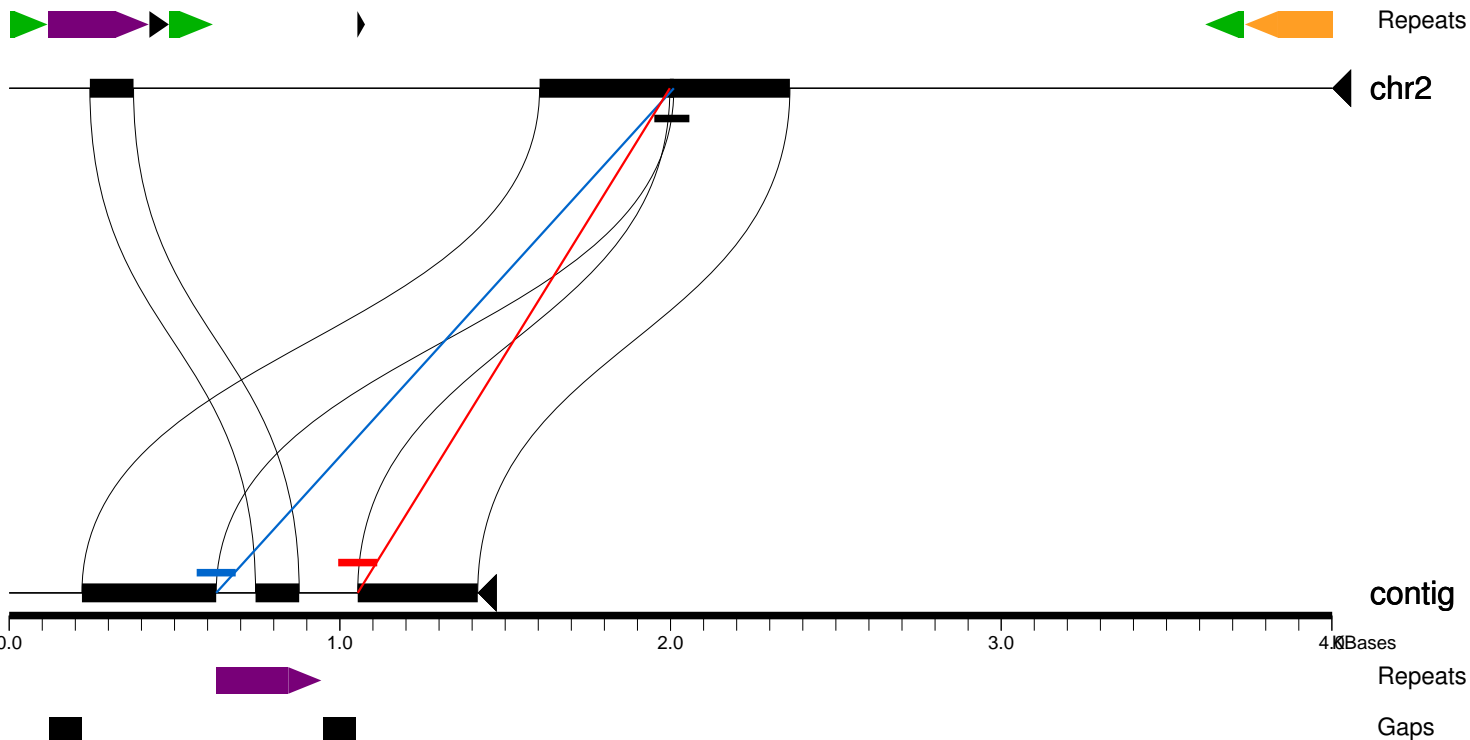

siteID: chr2\_15163745 Scaffitg1 + Breakpoint: chr2:15163754

chr2:15163606-15164170

Overlap Length: 13 INS size: 477 Genotyped: No

```

left  T-ATTTTAATAGATGTTGCCCATTGCTTTATAAAAAAGATTATAAAGTTTGGACATTTCTCCAAGCTAAAAAC
chrom TTTATTTTAAATAGATGTTGCCCATTGCTTTATAAAAAAGGTTATAAAGTTTGGACATTTCTCCAAGCTAAAAAC
right NNNNNNNNNNNN-----AAAA-----1N111111111111111111111111111111111111111111111111111111111111
1N1111111111111111111111111111111111111111111111111111111111111111111111111111111

```

```

left  TAAAAGTACTGTTCTCCTCTCATCCTTGCCAGCTATCAGTTTTATGTTTCTCTTTAAATCTTGCCAATCA
chrom TAAAAGTACTGTTCTCCTCTCATCCTTGCCAGCTATCAGTTTTATGTTTCTCTTTAAATCTTGCCAATCA
right 11111111111111111111111111111111111111111111111111111111111111111111111111111111111

```

```

left  ATGGGTATAAGATTATATCTTGG-----TGGCTCAC-----
chrom ATGGGTATAAAGATTATATCTTATAGTGATTTTCATCTATTTCTTGAGAGTTAATTTAAACATCATTTAG
right -----AAGATTATATCTTATAGTGATTTTCATCTATTTCTTGAGAGTTAATTTAAACATCATTTAG
1111111111*****222222222222222222222222222222222222222222222222222222222222222222222222

```

```

left  -----CGGGCGCGG-----TGGCTCAC-----
chrom TAAGTTTACTGGGCACTGGTATTTGCTTTTCTCTAAGTTGAAAAATGTACAACTTTGTCTATTTTCTTAA
right TAAGTTTACTGGGCA-----1N11111N
22222222*2****21N1

```

```

left  -----GCCT-----GTAA-----
chrom TGGTTGTTTGCCTTCTTGTCAACTTGTAAGAGATCTTTGAATATTTAAAAATATTCACACTTTGTTCATTT
right 1111 1111

```

```

left  -----TCCAGCA---CTTTGGGA---GGCCGAGGCGGGTGGATCATGAGGT-CAGGAG
chrom TTATCACTAATATTTTCAAAGCAATATCTTTGGTATTTGACTTATTTGTG-GGATTTTATATACACAAA
right 11NN1111 111111N1 1N1NN1NNN1N121111NN1N1NN1 11NN1N

```

```

left  AT-----CGAGACCATCCTGGCT-----AACA-----
chrom ATTTTATTTTACATATTTCAAATATATCCTCACTTTATTTTCTGGAAAAATATTTTATTTTATTTTAAT
right 11 1N1NNNN11111NN11 11N1

```

```

left  -----AGGT-----GAAACCCC-----GTCTCTACTAAA-----
chrom ATTTTAACTTTTATTTTGTAGGTTAAGGATACACGTGCAGGTTTGTATATAGGTAACCTGTATCTCAGG
right 1111 11N11N1N 11N1N1NN11N1

```

```

left  -----
chrom GGTTTG
right -----

```

Other Simple Repeat Low Complexity DNA LTR LINE SINE

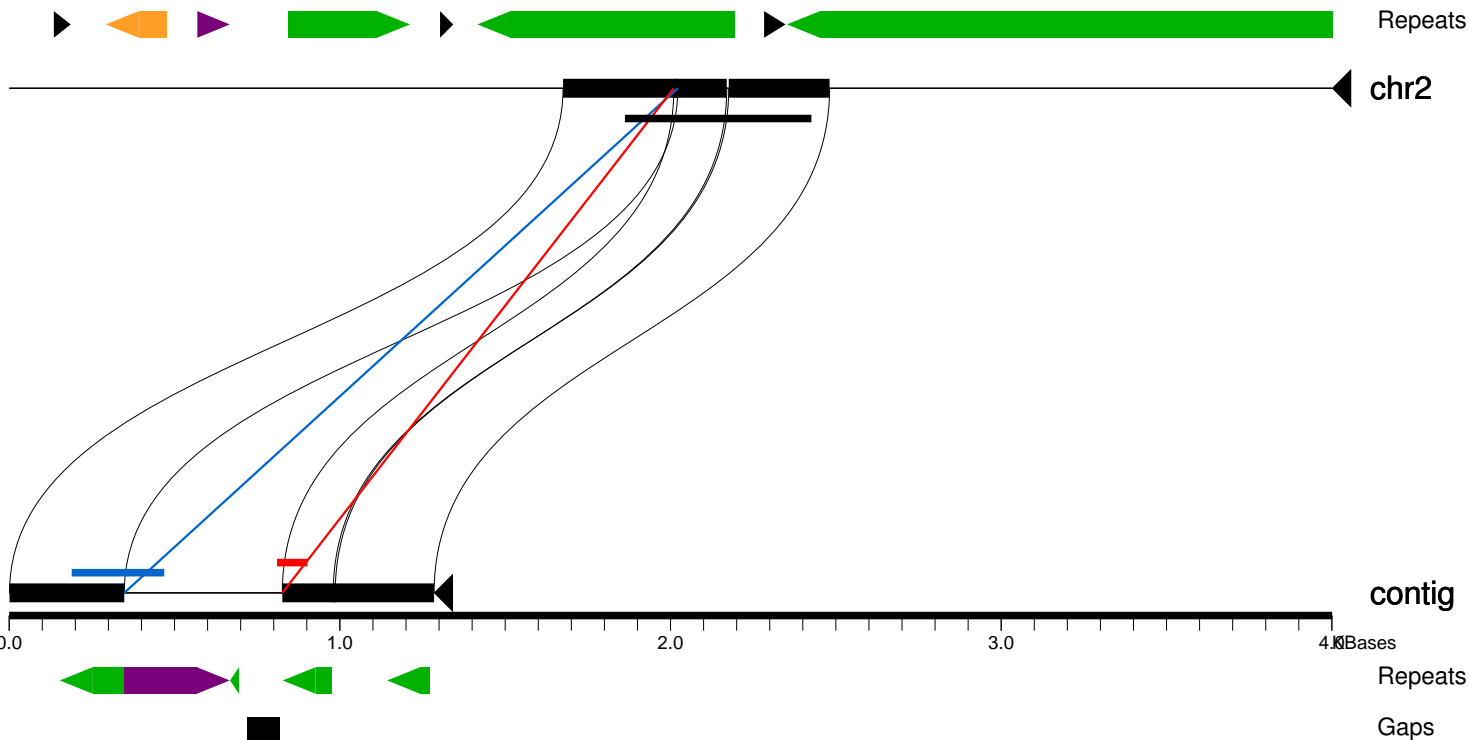

siteID: chr2\_153248290 Scafftig5 - Breakpoint: chr2:153248266

chr2:153248221-153248325

Overlap Length: 15 INS size: 318 Genotyped: Yes

```
left  TATTG---GAACTATGGTATCAGATTTCTGAAGGTCACATTAT-----TCAT--TAATAATAATG
chrom TATTG---GAACTATGGTATCAGATTTCTGAAGGTCACATTAT-----TCAT--TAATAATAATG
right GACAGAGCGAAACTCCGTCTCAAAAAAAAAAAAAAAAAAAAAAAAAAAAAAAAAAATAATAA TAATAATAATG
      1*11*111***11111**1***1*1111111**1111*1*11*1111111111*1**11*****
```

```
left  TTGCGGCCGGGCGCGGTGGCTCACGCCTGTAATCCCAGCACTTTGGGAGGCCGAGATGGGCGG
chrom TTGCT-----CTTTGA-----GCCCTTAAAATTGGCCTTTTTCTAGACTCCTAAACTCT-
right TTGCT-----CTTTGA-----GCCCTTAAAATTGGCCTTTTTCTAGACTCCTAAACTCT-
      ***222222222*22**222222***22***22222*22***222**2*2222*2222*22
```

Other Simple Repeat Low Complexity DNA LTR LINE SINE

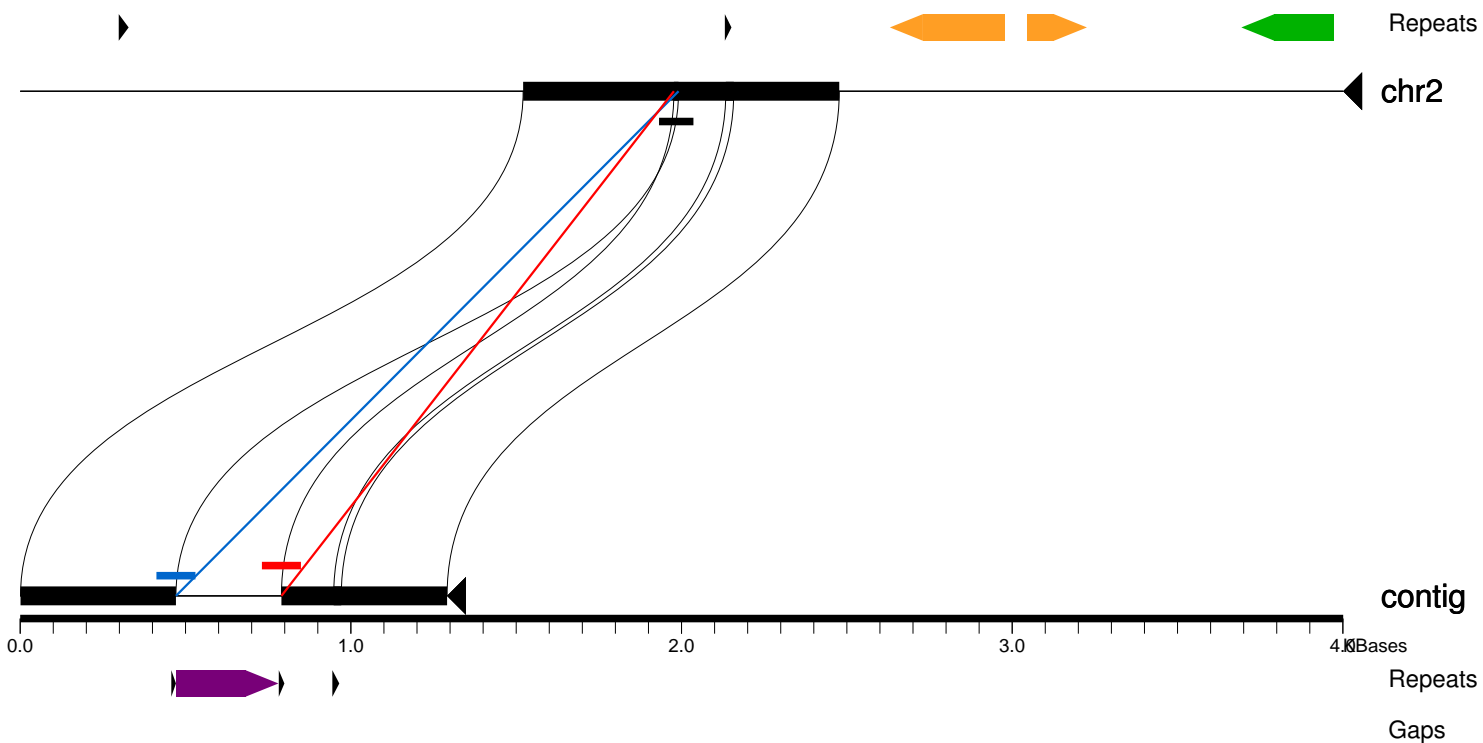

siteID: chr2\_154752579 Scafftig2 + Breakpoint: chr2:154752582

chr2:154752422-154752755

Overlap Length: 14 INS size: 311 Genotyped: Yes

```
left -----GATAAAAAAAGATATTTGTCACACAAGAAATTCACAATTAAGTAAA
chrom TTAATCAGTGATCTTGCAGTGTAAATGATAAAAAAAGATATTTGTCACACAAGAAATTCACAATTAAGTAAA
right TTTAGTAGAGAC---GGGGTTTCACCGTTTTAGCCGGGATGGTCTC----GATCTCCTGACCTC-GTGAT
22N2NN22N22N 2NN22N2N2N11*111*111*11**1***1*1111**11*1*11*11*11**1*1
```

```
left AAGAGAATATAATCATAAAAATAGTTTGTATGATATAATTTATTTAAATAATAGTCTGCGAGTAAGAACAGG
chrom AAGAGAATATAATCATAAAAATAGTTTGTATGATATAATTTATTTAAATAATAGTCTGCGAGTAAGAACAGG
right CCGCCCGCCTCGGCCTCCCAAAGT-----GCTGGGATTAC-----AGGC-GTGAGCCACCGCGC-
11*1111111*111*1*111*1***1111111*1*111***11111111111**1*1*1***11*111*111
```

```
left ATAGTTGTTTCTGGAATTAAGGATGATTTTATAATATATATATATATTTT-----TT----
chrom ATAGTTGTTTCTGGAATTAAGGATGATTTTATAATATATATATATATTTT-----TT----
right -----CCGGCC---GATGATTTTATATTTTATGTTTTTCTAAATTAACAAAAAACTTGCCA
11111111111*1**1111111******2*2***2*2*2**22*222**222222222**2222
```

```
left -TTT---TTTGTAGACGGA---GTCT-----CGCTC-TGTCGCCCAGGCTGGAGTGCAG-TGGCG
chrom CTTTCGATTTAGAAAACTAATTGTATAAAGGAAAAACCACTTATATTGCTAATCTTTAAAGACTGATAACC
right CTTTCGATTTAGAAAACTAATTGTATAAAGGAAAAACCACTTATATTGCTAATCTTTAAAGACTGATAACC
2***222***2**2*222*222**2*2222222222*2**22*2*2**22*222*22*222*2*2*22*2
```

```
left GGATCTCGGCTCACTGCAAGCTCCGCCTCCCGGTTAATGCCATTCTCCTGCCTCAGC
chrom TTTTGTCTTTTTTCTTTAAGTCCTGACTACT--TTCACTTATTTTTTGATTAC-CAT-
right TTTTGTCTTTTTTCTTTAAGTCCTGACTACT--TTCACTTAT-----
222*2**222*22**22***22*2*2**2*2222*2*2*222N1N1NN1NN1211N2
```

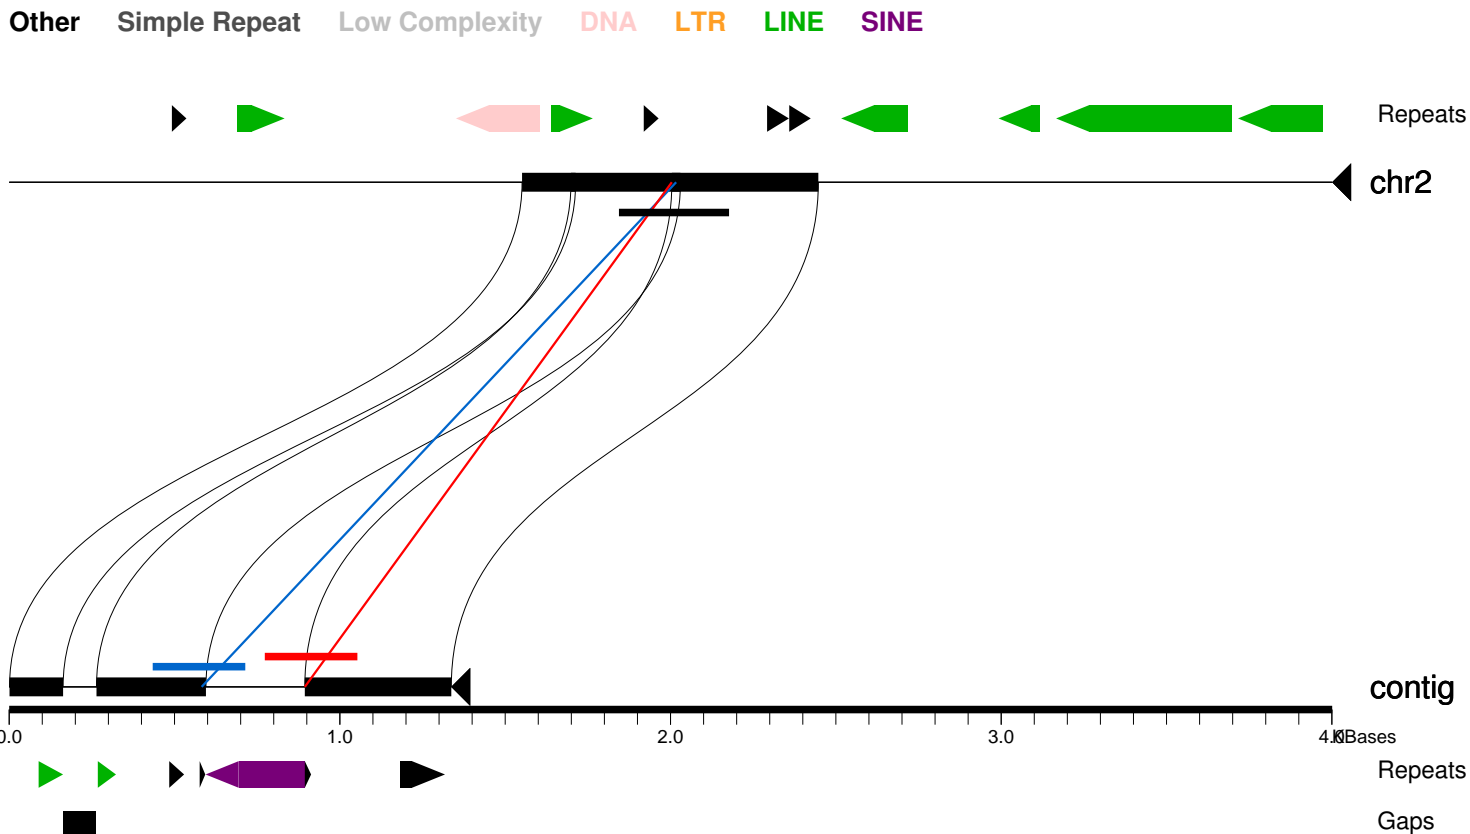

siteID: chr2\_15519529 Scaffitig5 - Breakpoint: chr2:15519540

chr2:15519494-15519599

Overlap Length: 14 INS size: 298 Genotyped: Yes

```
left  AATCAGCAAAAATGACCATGGGAAAGCGCG-----CTGGAGAAAAATGTTT----AAGAAGCTGAT
chrom AATCAGCAAAAATGACCATGGGAAAGCGCG-----CTGGAGAAAAATGTTT----AAGAAGCTGAT
right CCACTGCACTCCAGCCTGGGCGACAGAGCGAGACTCCGTCTCAAAAAAAAAAAAAAAAAAAGAAAGAAGCTGAT
      111*1***11111*1*111*1**1**1***111111111**11*1*****111111111******
```

```
left  GGAGGCCGGGCGCGGTGGCTCACGCCTGTAATCCCAGCACTTTGGGAGGCCGAGGCGGGCGG
chrom GGACATTCATAACATAGTTTTTCTTTTTATATTC AAGCAAAAAATAACT-----
right GGACATTCATAACATAGTTTTTCTTTTTATATTC AAGCAAAAAATAACT-----
      **222222222*222*22*22*222*222**2*2***222222*222222222222222
```

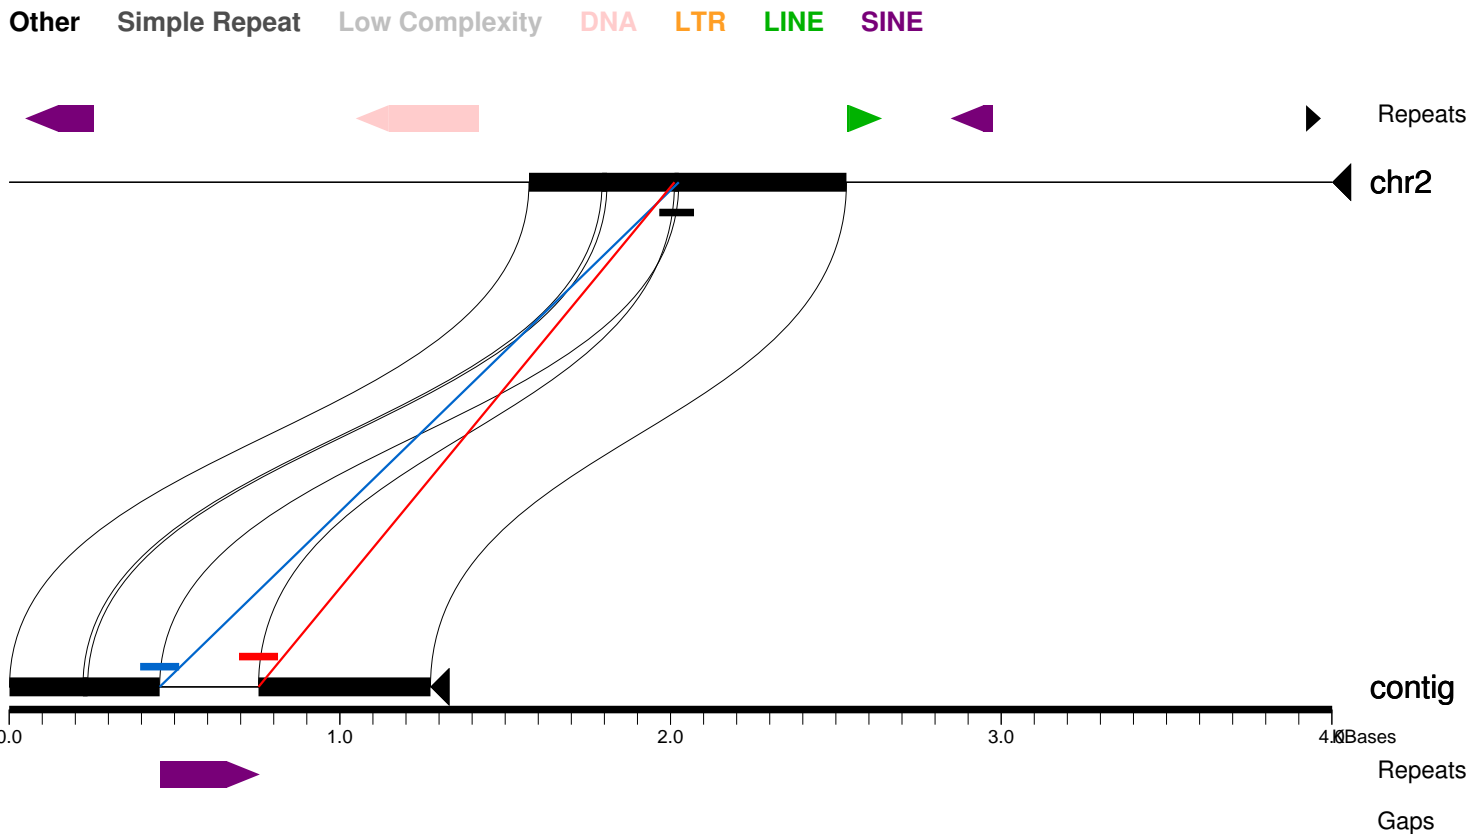



siteID: chr2\_157661280 Scaffoldig1 - Breakpoint: chr2:157661244

chr2:157661200-157661303

Overlap Length: 16 INS size: 414 Genotyped: No

```
left      ---GTGCAGGTAAAAATATATATGTAG-GTAATTTGAAAAAT-AGCCAT-----CAATACTATTA
chrom     ---GTGCAGGTAAAAATATATATGTAG-GTAATTTGAAAAAT-AGCCAT-----CAATACTATTA
right    TCCGCCCCTCGGCTCCCAAAGTCTGGGATTACAGGCGTGAGCCACCGCGCCCGGC CAATACTATTA
          111*11*111*11111*1111*1**111*11***11*1111*1*****1111111111******
```

```
left      CTTTTTTTTNNNNNNNNNNNNNNNNNNNNNNNNNNNNNNNNNNNNNNNNNNNNNNNNNNNNNNNNNNNN
chrom     CTTTT-----GAAATTATTTTTTTTTCATTTCAAATAAAATAAAAATTAGGAAAATGC
right    CTTTT-----GAAATTATTTTTTTTTCATTTCAAATAAAATAAAAATTAGGAAAATGC
          ***2222222222222222222222222222222222222222222222222222222222222222222222
```

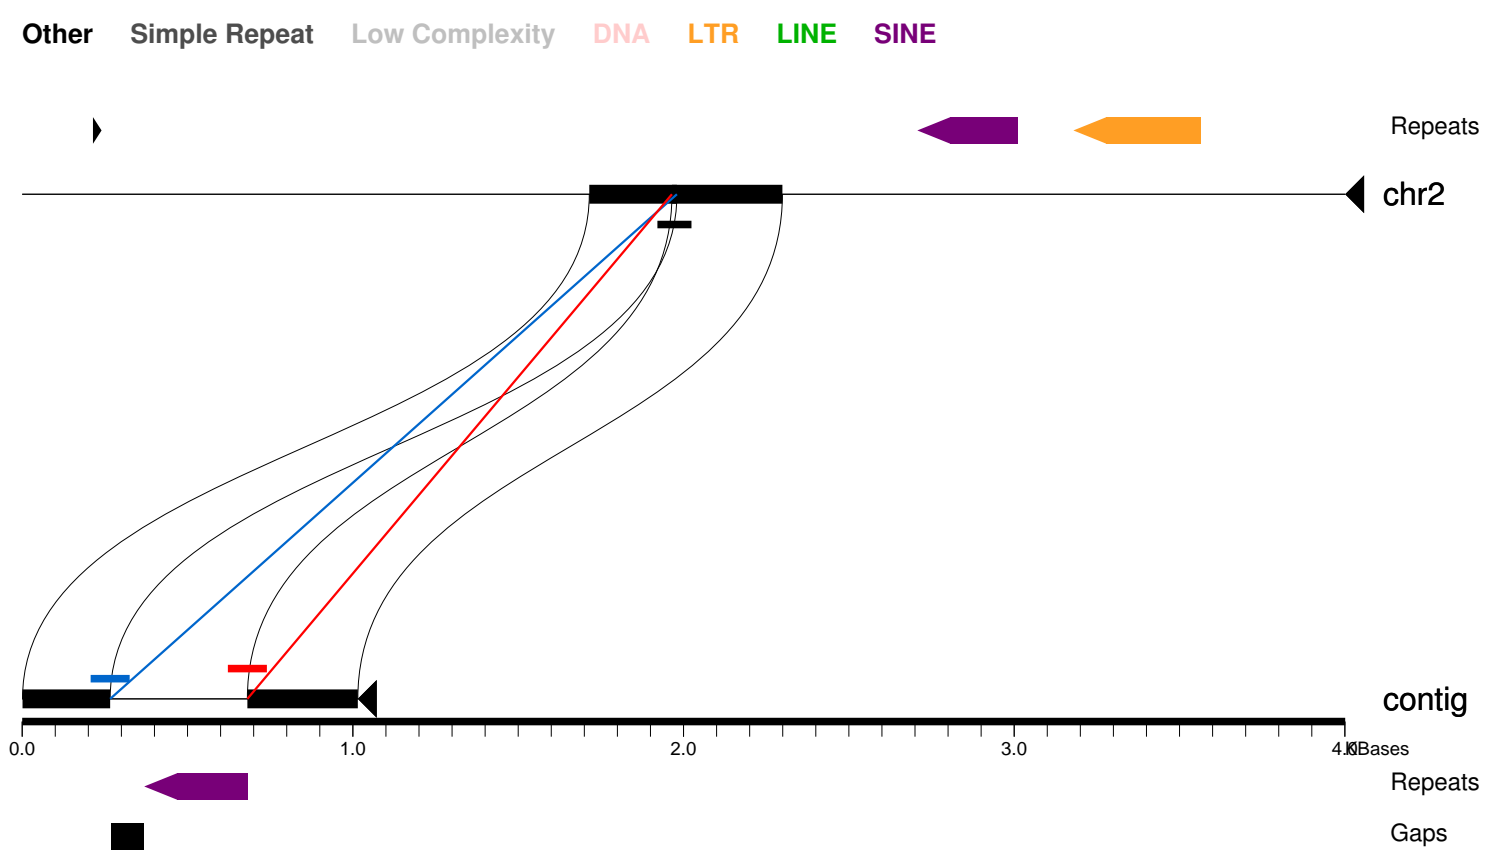

siteID: chr2\_158028066 Scaffitig1 + Breakpoint: chr2:158028141

chr2:158028113-158028200

Overlap Length: 32 INS size: 234 Genotyped: No

```

left   TATA----AATG-CTGCAT----GATAA----AAGTACCGC-----AAAATTTAATG
chrom  TATA----AATG-CTGCAT----GATAA----AAGTACCGC-----AAAATTTAATG
right  TGGAGTGCAGTGGCGGGATCTCGGCTCACTGCAAGCTCCGCCTCCCGGGTTTCACGCCATAAAATTTAATG
      *11*1111*1**1*1*1**1111*1*1*1111***11****11111111111111111111*****
  
```

```

left   TCTTAAATAGCCTTTACTAAGNNNNNNNNNNNNNNNNNNNNNNNNNNNNNNNNNNNNNNNNNNNNNNNNNNNNNNNNNNNNNN
chrom  TCTTAAATAGCCTTTACTAAGCCTTACAAGCCTTCAAGTCAGCAAATCAA-----
right  TCTTAAATAGCCTTTACTAAGCCTTACAAGCCTTCAAGTCAGCAAATCAA-----
      *****2222222222222222222222222222222222222222222222222222222222222222222222
  
```

```

left   NNNNNNNNNNN
chrom  -----
right  -----
      22222222222
  
```

Other    Simple Repeat    Low Complexity    DNA    LTR    LINE    SINE

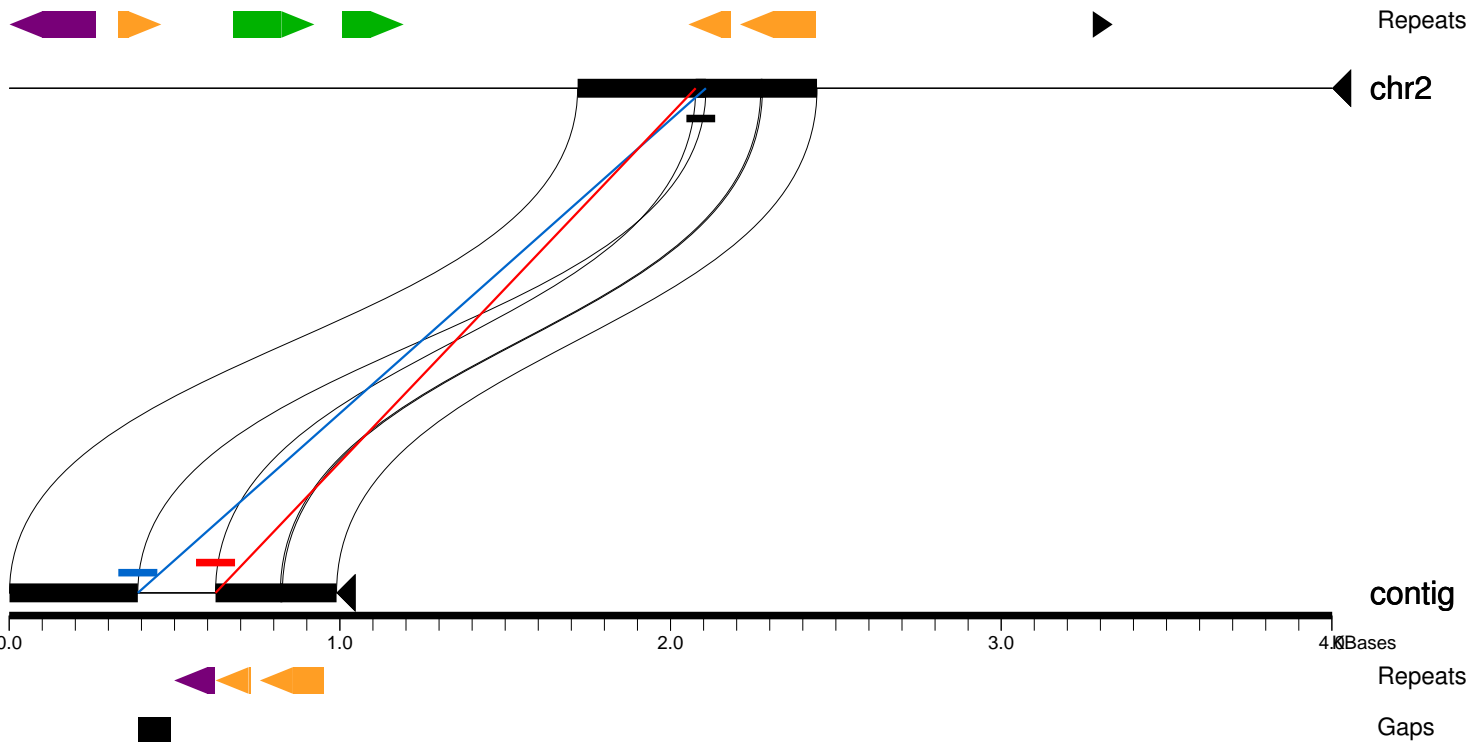



siteID: chr2\_158510345 Scafftig8 - Breakpoint: chr2:158510356

chr2:158510313-158510410

Overlap Length: 16 INS size: 309 Genotyped: Yes

```
left      -----TCTGGCAAGGGC-----CTTCTTGCTGCATTATAACACAGCAGAAGATAAGA
chrom     -----TCTGGCAAGGGC-----CTTCTTGCTGCATTATAACACAGCAGAAGATAAGA
right    GCAGTCTGCAGTCTGGCCTGGGCGACAGAGCGAGACTCCGT-CT-CAAAAAAAAAAAAAAAAAAAAAAAGA
          111111111111*****11****111111111111**1*1*1**1*1*1*1*1*1*1*1*1*1****
```

```
left      AAGTAAGAGAGAAGGGCCGGGCGCGGTGGCTCACGCCTGTAATCCCAGCACTTTGGGAGGCCGAGGCGGGT
chrom     AAGTAAGAGAGA-----GCAAGAGGGTCCA-----AATTCATTCT-TTTATAAGG-----GTAT
right    AAGTAAGAGAGA-----GCAAGAGGGTCCA-----AATTCATTCT-TTTATAAGG-----GTAT
          *****2222222**22*22**22**2222222***2*222*22***222***2222222*22*
```

```
left      GG-
chrom     GAA
right    GAA
          *22
```

Other Simple Repeat Low Complexity DNA LTR LINE SINE

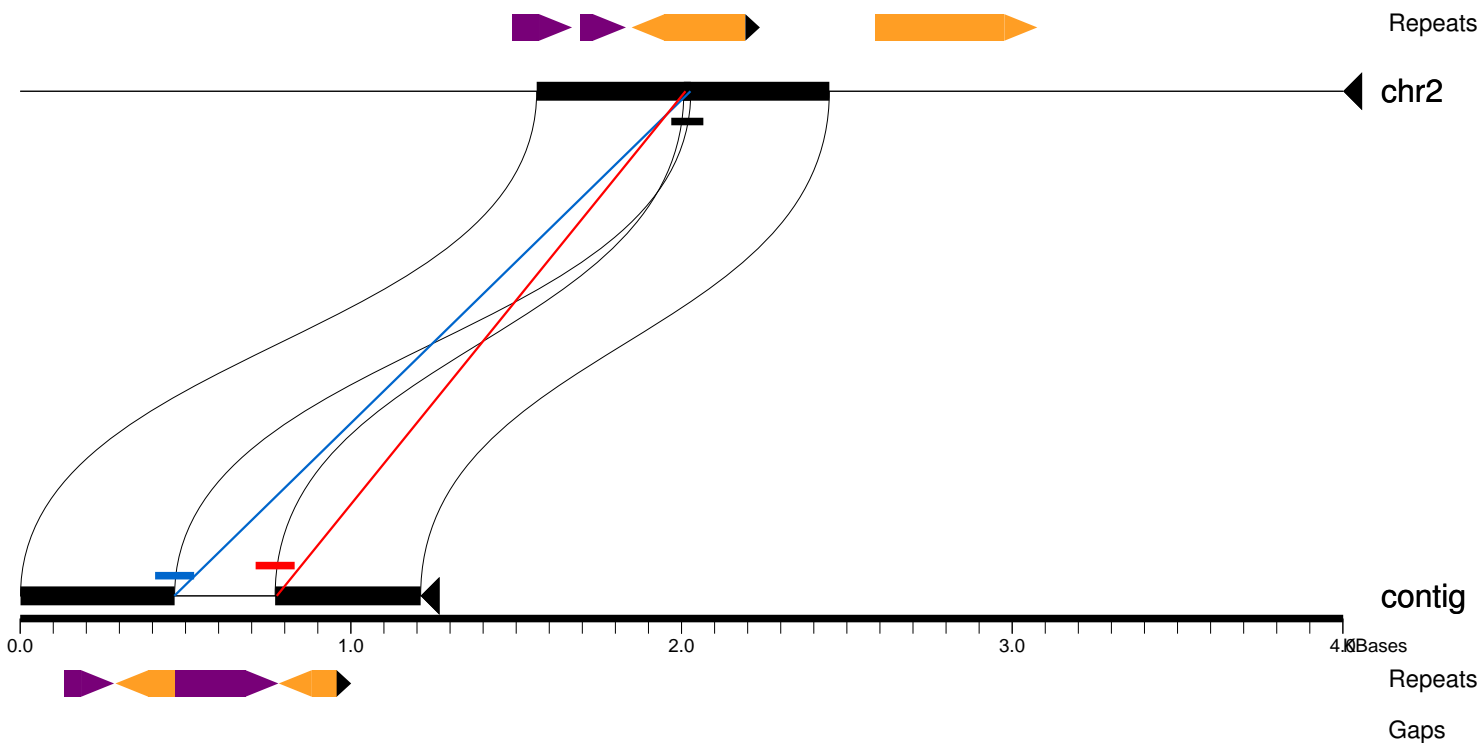

siteID: chr2\_159282655 Scaffoldig2 + Breakpoint: chr2:159282630

chr2:159282576-159282689

Overlap Length: 6 INS size: 422 Genotyped: No

```
left    TAATTCTCTTAGTAAAAATCCAAATAAATATAGAAAAGAACACTGTAAAACGTGT-----GGTAGGGCCG
chrom   TAATTCTCTTAGTAAAAATCCAAATAAATATAGAAAAGAACACTGTAAAACGTGT-----GGTAGGAACTA
right   NNNNNNNNNNNNNNNNNNNNNNNNNNNNNNNNNNNNNNNNNNNNNNNNNNNNNNNNNNNNNNNNNNNNNNN
1111111111111111111111111111111111111111111111111111111111111111111111
*****22*22

left    GGCGCGGTGGCTCACGCCTGTAATCCAGCACTTTGGGAGGCCGAGGCGGGCGG
chrom   TA-GTTTAAAGTAGTGAAAGTAATTATAACACA--AGGAATTTCA--CAGATAG
right   TA-GTTTAAAGTAGTGAAAGTAATTATAACACA--AGGAATTTCA--CAGATAG
222*2222222*222*222*****222*2***2222***22222*22*2*222*
```

Other Simple Repeat Low Complexity DNA LTR LINE SINE

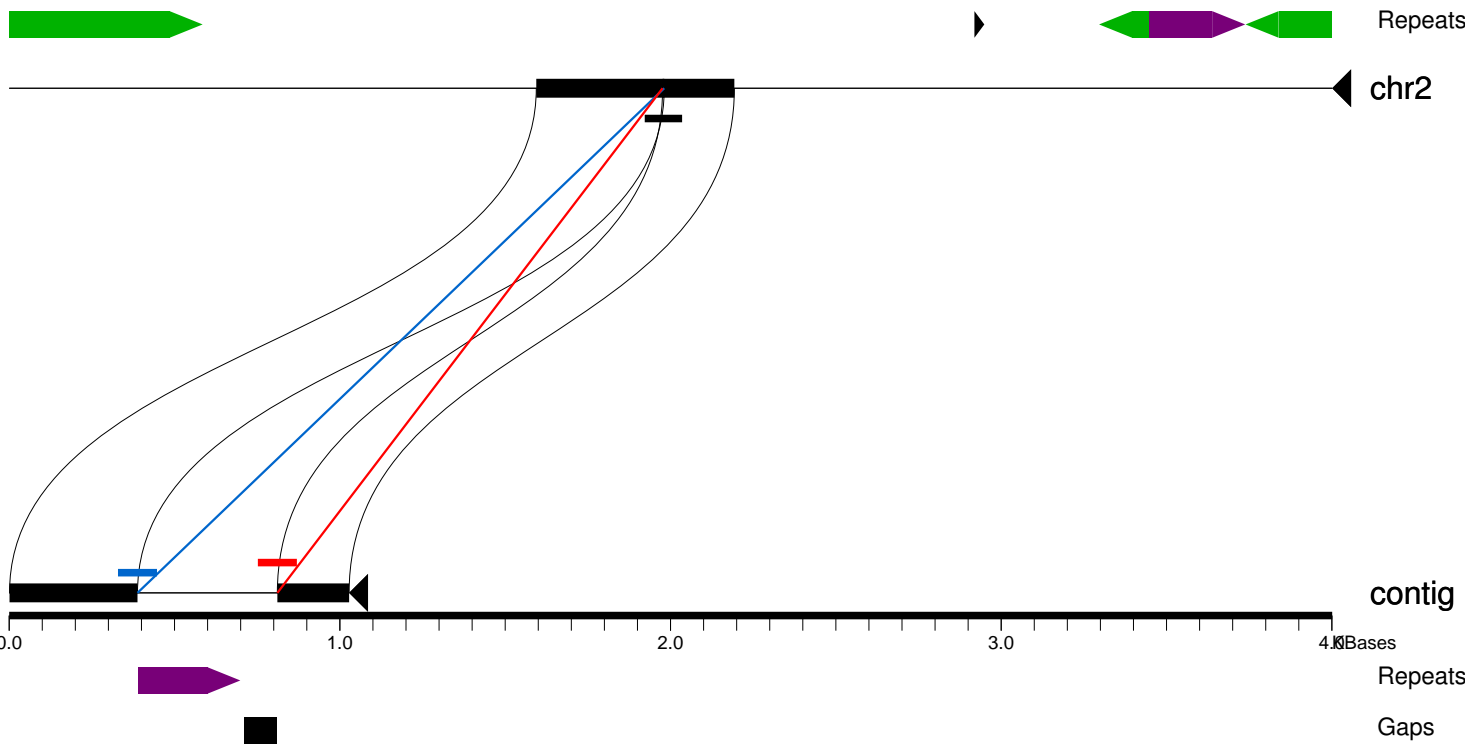

siteID: chr2\_159285148 Scaffitg1 - Breakpoint: chr2:159285132

chr2:159285088-159285191

Overlap Length: 16 INS size: 286 Genotyped: Yes

```
left  CCA-----CAATGAGATACCATCTCA-CACCAGTTAGAATGGTGATC-----ATTAAAAAGTCAGG
chrom CCA-----CAATGAGATACCATCTCA-CACCAGTTAGAATGGTGATC-----ATTAAAAAGTCAGG
right TCGAGATCGCGCCACTGCGCTCCAGCCTGGGCGACAGAGCGAAACTCCATCTCAAAAAAATAAAAAAGTCAGG
      1*111111111111**1**1*1*1*111**111*11***111***11111***11111*11*****

left  AAACAGGCCGGGCGCGGTGGCTCACGCCT-GTAATCCCAGCACTTTGGGAGGCCGAGACGGGCGG
chrom AAACA--ACAGGTGCTGGAGAGGATGTAGAGAAATAGGAACACTTTT-----ACAC-----
right AAACA--ACAGGTGCTGGAGAGGATGTAGAGAAATAGGAACACTTTT-----ACAC-----
      *****222*2**2**2*22*222*2*2222*2***222*2*****22222222*2**222222
```

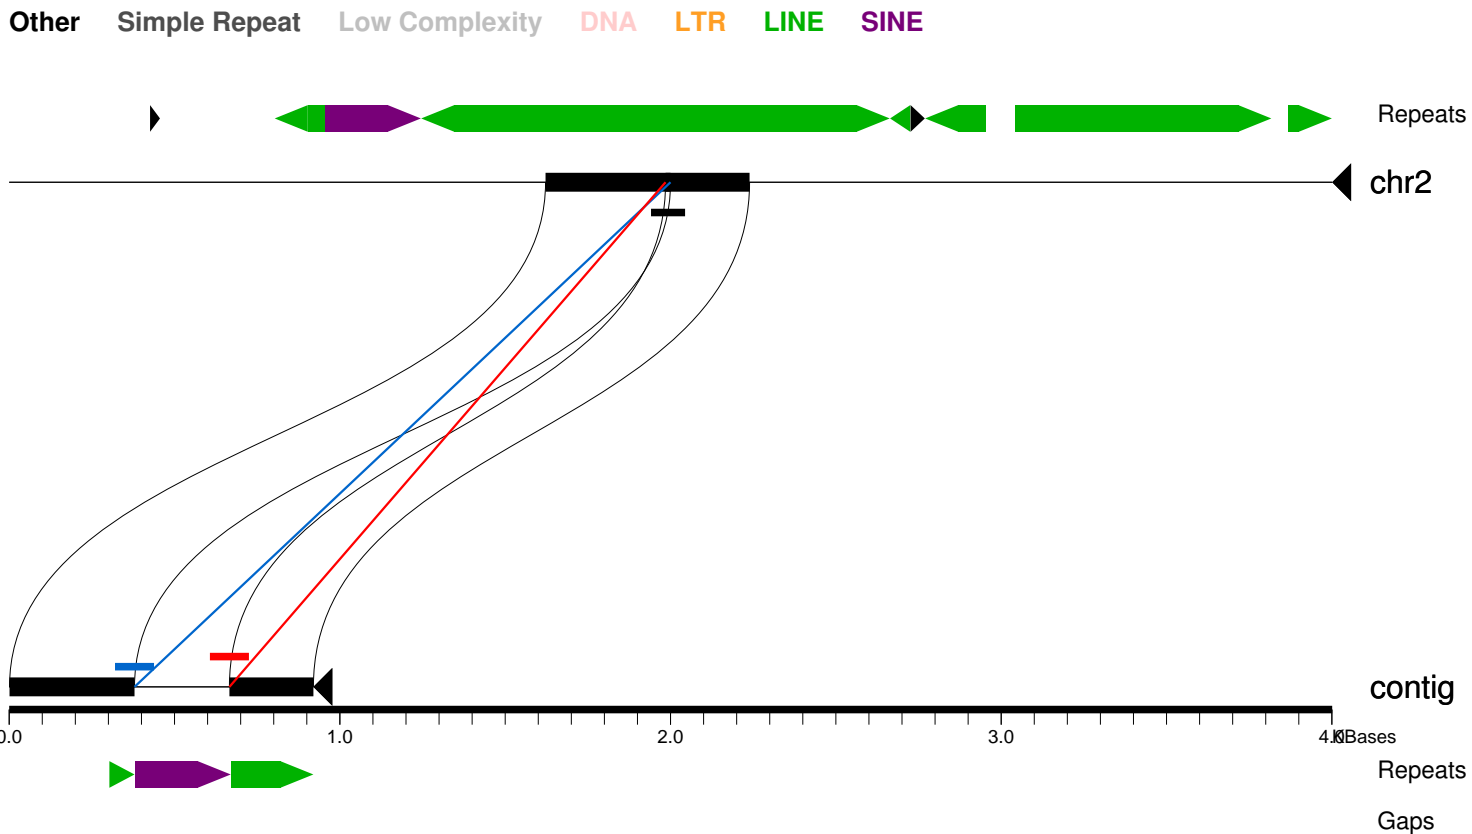

siteID: chr2\_161952345 Scafftig18 - Breakpoint: chr2:161952317

chr2:161952278-161952376

Overlap Length: 21 INS size: 279 Genotyped: Yes

```
left   T--GTTGAGAA-GCACAGAGAGAAATCAATTAAAGCAA-----GTTT-----AAAAAAAAAAAA
chrom  T--GTTGAGAA-GCACAGAGAGAAATCAATTAAAGCAA-----GTTT-----AAAAAAAAAAAA
right  CAAGCCGAGATTGCACCACTGGATACCAGTCCAGGCAACAATGTGAGACTGTCTCAAAAAAAAAAAAAAAA
      111*11****11****11111**1*1*1*11*1****111111111111**1*11111*****
```

```
left   AAAAAAAGGCCTGCGTGGTGGCTCACGCCTGTAATCC--CAGCACTTTGGGAGGCTGAGGCGGGCAAATC
chrom  AAAAAATAGGCACCAGT-----ACTCTGGAAATGCTACAAAATGTTTAAATGCTT-----
right  AAAAAATAGGCACCAGT-----ACTCTGGAAATGCTACAAAATGTTTAAATGCTT-----
      *****2***2222**22222222**2*22*2***2*22**22*22**22*2***22222222222222
```

```
left   A
chrom  -
right  -
      2
```

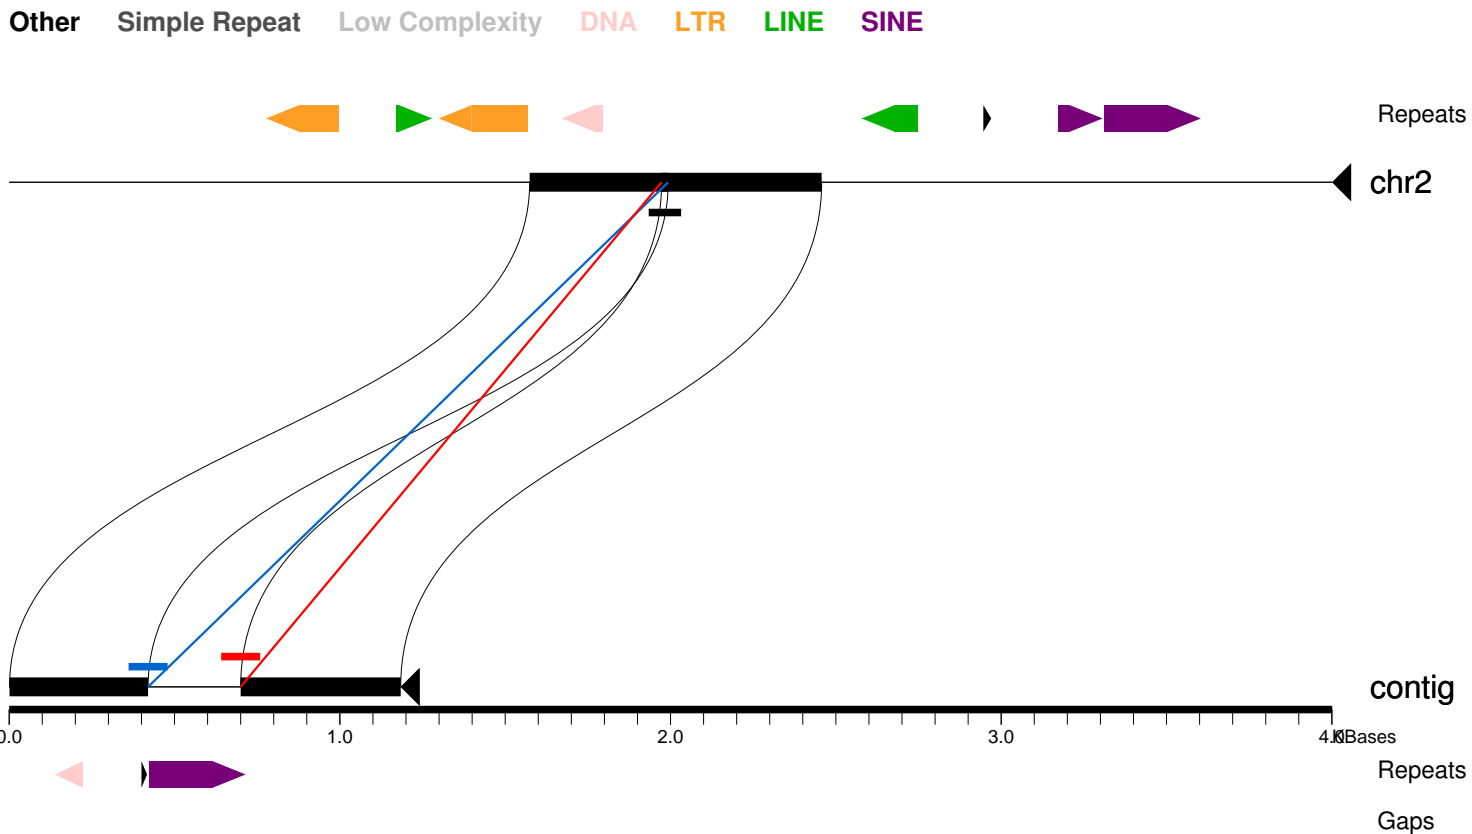

siteID: chr2\_162004249 Scafftig1 + Breakpoint: chr2:162004213

chr2:162004170-162004272

Overlap Length: 17 INS size: 473 Genotyped: No

```

left  GACAGAACCTGGATACCTCCGTTGCCAGTGAAGGATTTGCGTG-----CTGTTATAGTC
chrom GACAGAACCTGGATACCTCCGTTGCCAGTGAAGGATTTGCGTG-----CTGTTATAGTC
right NNNNNNNNNNNNNNNNNNNNNNNNNNNNNNNNNNNNNNNNNNNNNNNNNNNNNNNNNNNNNNNN
      1111111111111111111111111111111111111111111111111111111111111
      *****
  
```

```

left  CTTTTTTTTTTTTNNNNNNNNNNNNNNNNNNNNNNNNNNNNNNNNNNNNNNNNNNNNNNNNNN
chrom CTTTTTGGAT-----GGGAGCCTCCAATCGCTGCTCCTTCTAGTCGGCCATCATG
right CTTTTGGGT-----GGGAGCCTCCAATCGCTGCTCCTTCTAGTCGGCCATCATG
      *****12N*222222222222222222222222222222222222222222222222222
  
```

Other   Simple Repeat   Low Complexity   DNA   LTR   LINE   SINE

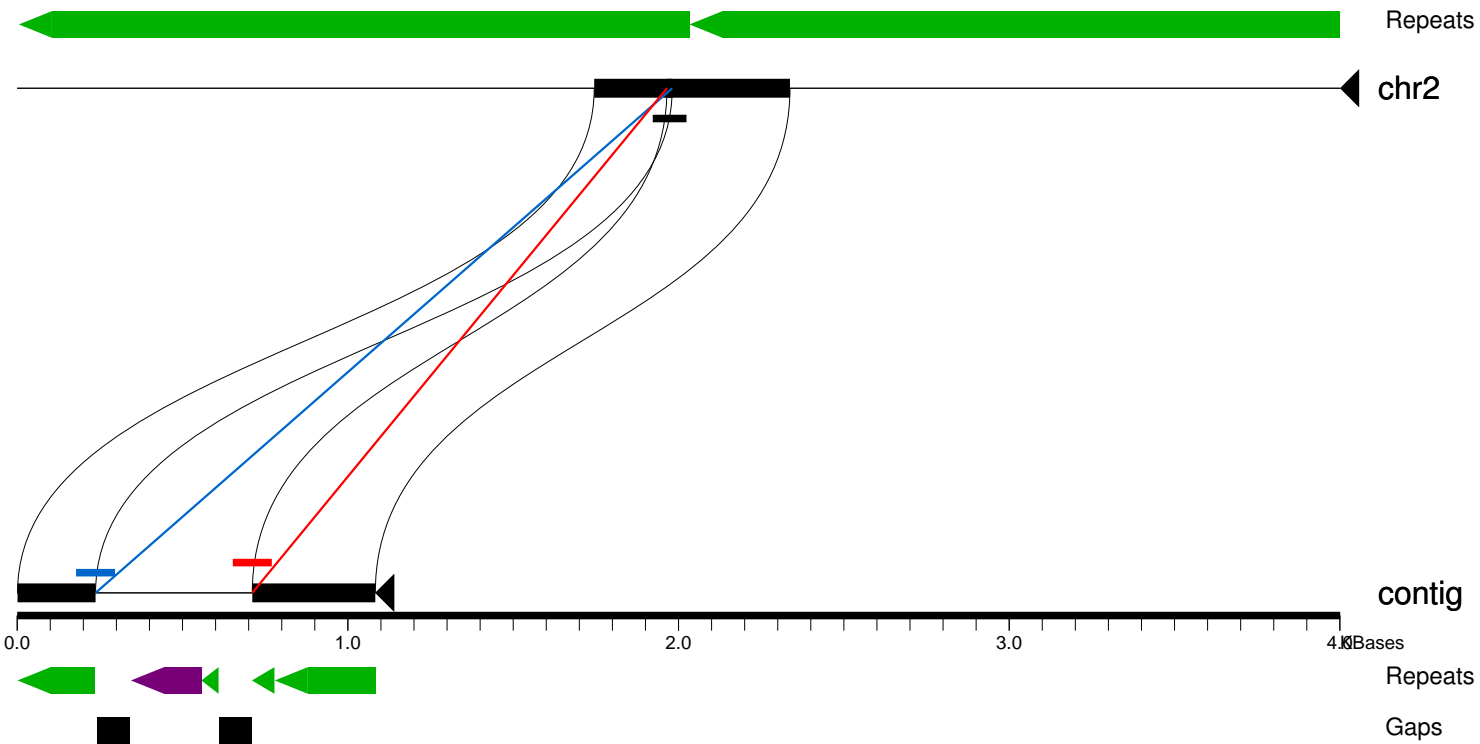



siteID: chr2\_162765260 Scafftig2 - Breakpoint: chr2:162765246

chr2:162765192-162765305

Overlap Length: 5 INS size: 300 Genotyped: No

```
left  GTAAAGAAATGGAGAAAG--CTGCATAGGCC-----AGTTGGTGTCAAAGAAAGTGGGAAACAGAAANNNN
chrom GTAAAGAAATGGAGAAAG--CTGCATAGGCC-----AGTTGGTGTCAAAGAAAGTGGGAAACAGAAATGCC
right -TCCTGACCTCGTGATCCGCCCGCCTCGGCCTCCCAAAGTGCTGGGATTACAGGCGTGAG-CAGAATGCC
      1*111**11*1*1**11111*1**1*1***11111*11**1**11*1111*1*1*1**11*1***2222
```

```
left  NNNNNNNNNNNNNNNNNNNNNNNNNNNNNNNNNNNNNNNNNNNNNNNNNNNNNNNNNNNNNNNNNNNNNNNNN
chrom TTTTGAGGAGGGCAATGAAATCGTAAGATTGATAATTTGTGACAGAGAAGG-----
right TTTTGAGGAGGGCAATGAAATCGTAAGATTGATAATTTGTGACAGAGAAGG-----
      22222222222222222222222222222222222222222222222222222222222222222222
```

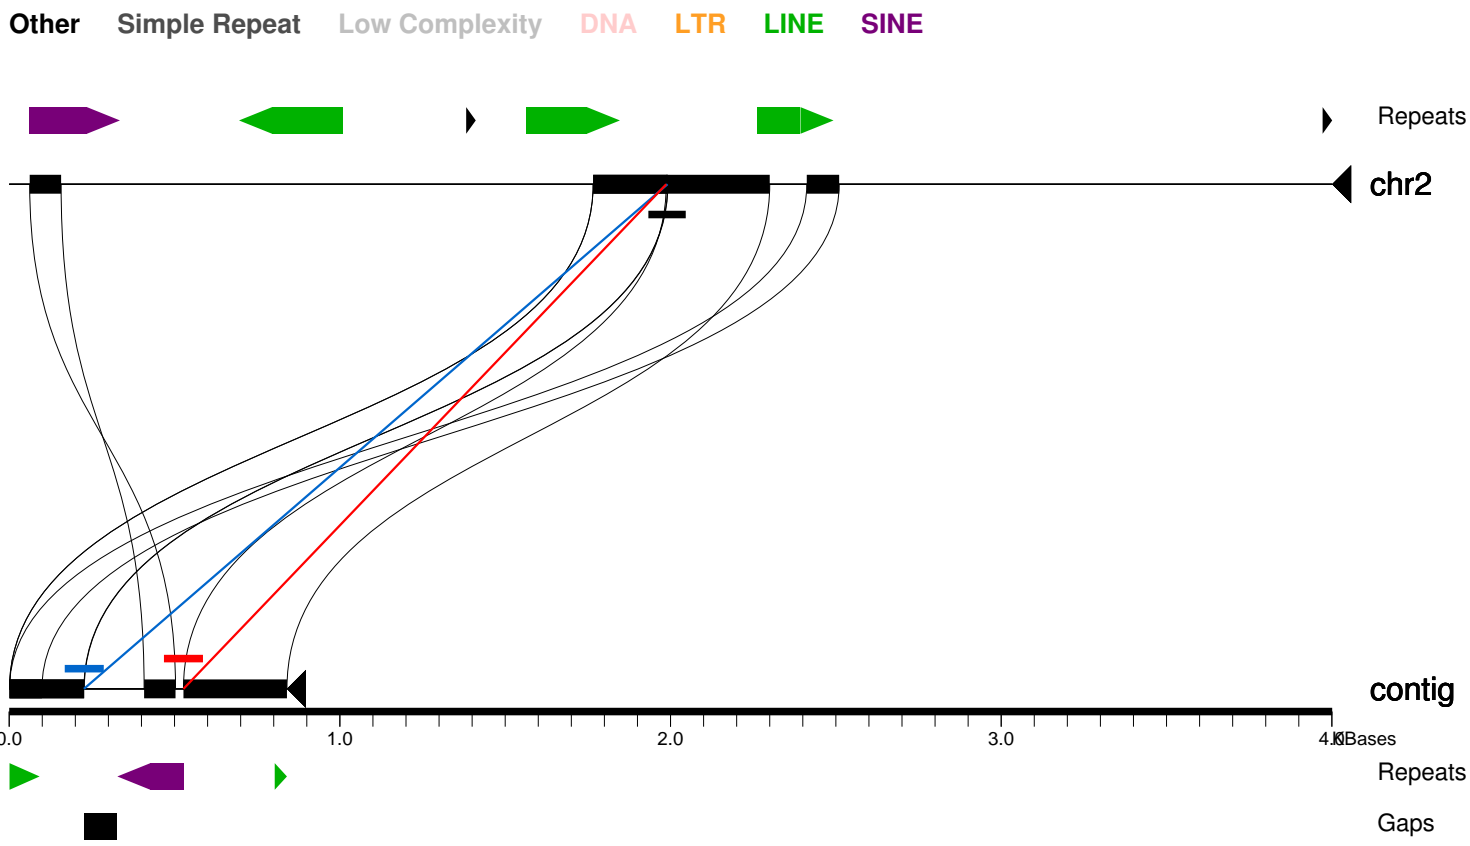

siteID: chr2\_163678626 Scaffitig1 + Breakpoint: chr2:163678618

chr2:163678579-163678677

Overlap Length: 14 INS size: 297 Genotyped: Yes

```
left  AATTTGATTGAGGC---CATAATCTCCACAATAAAG-----CCC--CTAAAATTTTACTT
chrom AATTTGATTGAGGC---CATAATCTCCACAATAAAG-----CCC--CTAAAAATTTTACAT
right CGCCCGCCTCGGCCTCCCAAAGTGCTGGGATTACAGGCGTGAGCCACCGCGCCCGGCCAAATTTTACAT
      11111*11*11*1*111**1*1*111111*1**1**1111111111111111***11*11******2*
```

```
left  TTTTTTTTTTTTTTTTTTTGAGACGGAGTCTCGCTCTGTCGCCAGGCTGGAGTGCAGTGGCGGGATCTC
chrom TTTAAATTTTCAAAAACCGCTGCT-AATTTCT-TCTTTGACCTATGATGTA-----
right TTTAAATTTTCAAAAACCGCTGCT-AATTTCT-TCTTTGACCTATGATGTA-----
      **222***22222222*222*22*2*2**22***2*22*2*2*2**2*222222222222222222
```

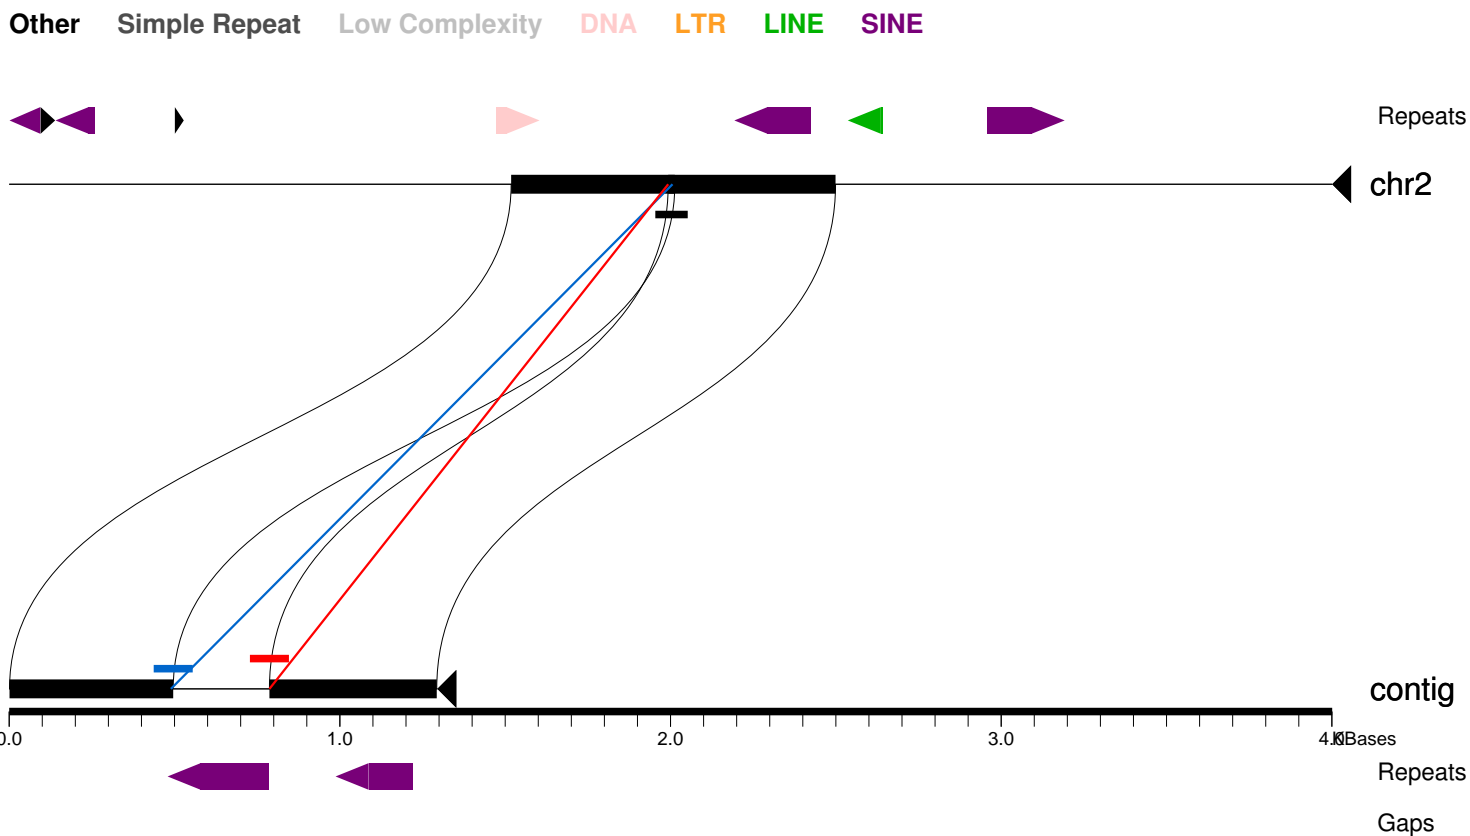

siteID: chr2\_165492048 Scafftig3 + Breakpoint: chr2:165492057  
 chr2:165491898-165492235  
 Overlap Length: 19 INS size: 339 Genotyped: No

```

left  NNNNNNNNNNNNNNNNNNNNNNNNNNNNNNNAT-----GCCAACCTGGTACTATTTAAGTCTCAT
chrom GATAGGAGGAAGTTAGAGATAAAAATTTCAACCTCCCTTCTGATGCCAACCTGGTACTATTTAAGTCTCAT
right NNNNNNNNNNNNN-----AAAAA-----
      NNNNNNNNNNNNNNNNNNNN2N222*1                          11111111111111111111111111
left  GCCATCTAAGGCCTGCATTTACATGTCCCCTTCCAACCCCAAAATATCTCTCTCATAAGGGGGCTTACT
chrom GCCATCTAAGGCCTGCATTTACATGTCCCCTTCCAACCCCAAAATATCTCTCTCATAAGGGGGCTTACT
right -----
      1111111111111111111111111111111111111111111111111111111111111111111111
left  CAATGTACAAAGGATGCCTAGATAATTTGTATGCTCTTGCCGGGCGCGGTGGCTCACGCCTGTAATCC--
chrom CAATGTACAAAGGATGCCTAGATAATTTGTATGCTCTTTAAGGATTAATGGATCATTTCATTTCTTT
right -----AGATAATTTGTATGCTCTTTAAGGATTAATGGATCATTTCATTTCTTT
      1111111111111111111111111111111111111111111111111111111111111111111111
left  ---CAGCACTTTGGGAGGCCGAGCG---GCCGAT--CACGAGGTCAGGAGATCGAGAC-CATCCT---
chrom ATGCATCAATTCAG-AGTCTGTTGTCTATGGGGTATGGCATTCCTATTAGAAAAATCTTGTCAGCCTTTA
right ATGCATCAATTCAG-AGTCTGTTGTCTATGGGGTATGGCATTCCTATTAGAAAAATCTTGTCAGCCTTTA
      222**2**2**22*2**2*2*22*22222**2*2**22**22222*2**2*2**22*2*2**222
left  -----GGC-----TACACGGTGAACCCCGTCTCTACTAAAA-----
chrom AGAAACTTAAGTCATATATTAACAAACACATAACAATCCGCAACTTAAAAATCAGTGTG
right AGAAACTTA-----
      22222222 1N1      11111NNNNN1N1N1NNNN1N1N111N11
  
```

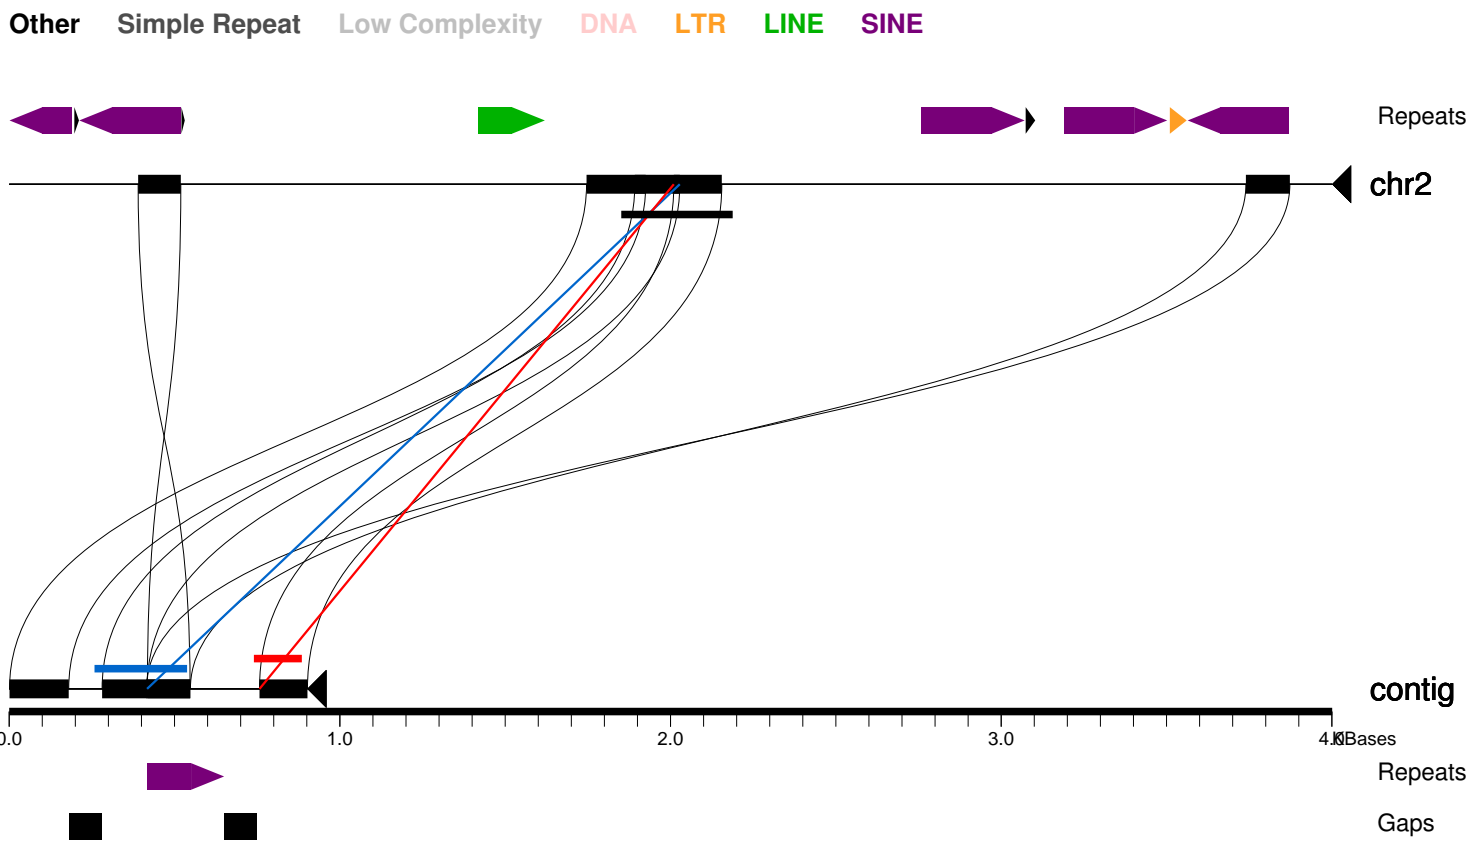

siteID: chr2\_166401044 Scaffitg1 - Breakpoint: chr2:166401033

chr2:166400977-166401092

Overlap Length: 4 INS size: 422 Genotyped: No

```

left  ATGATCTGACTTAGATATTTAAAAGGATCTACCTGGCAACTGTGTAAAAGTTGGC---TGTAGGCCGGG
chrom ATGATCTGACTTAGATATTTAAAAGGATCTACCTGGCAACTGTGTAAAAGTTGGC---TGTAAAAGAGA
right NNNNNNNNNNNNNNNNNNNNNNNNNNNNNNNNNNNNNNNNNNNNNNNNNNNNNNNNNNNNNNNNNNNNN
      11111111111111111111111111111111111111111111111111111111111111111111
      ***22222*2

left  CGCGGTGGCTCACGCCTGTAATCCCAGCACTTTGGGAGGCCGAG-GCGGGCGG-
chrom AAAAATGTAGGAGATCT----TTTCAGGAGGCTTGGAC-CAGAGTGAGAGAGTA
right AAAAATGTAGGAGATCT----TTTCAGGAGGCTTGGAC-CAGAGTGAGAGAGTA
      22222**2222*222**2222*22***2*222*2***22*2***2*2*2*2*22

```

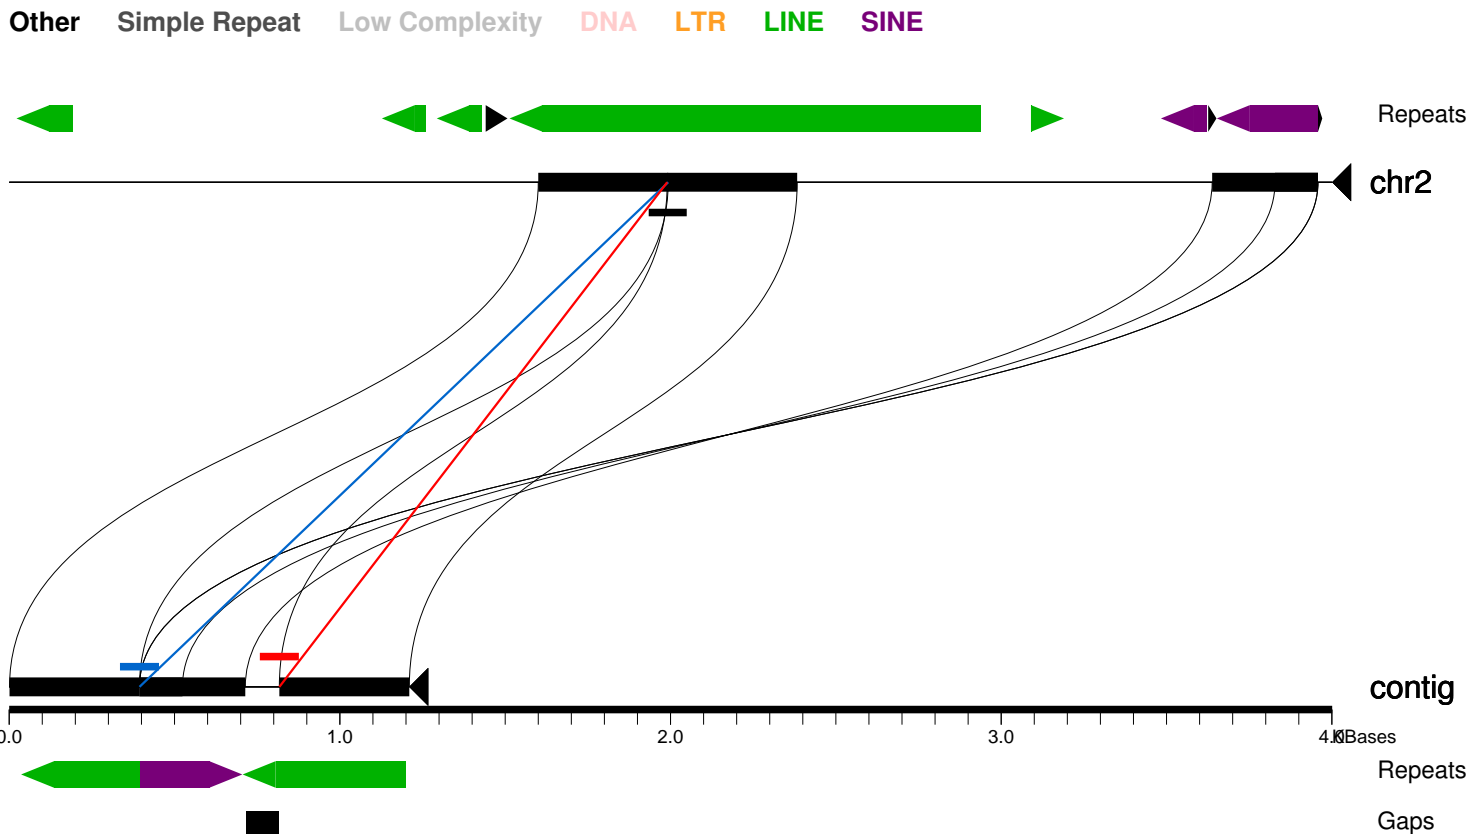



siteID: chr2\_173316733 Scafftig1 - Breakpoint: chr2:173316723

chr2:173316671-173316782

Overlap Length: 8 INS size: 407 Genotyped: No

```
left  TGAAATCACATGGTACT--TAAAGATATTTATATTATCTTCTCTAT-----CGTCTTTTCCTCCCTTNN
chrom TGAAATCACATGGTACT--TAAAGATATTTATATTATCTTCTCTAT-----CGTCTTTTCCTCCCTTCA
right TCCGCCCGCCTCGGCCTCCCAAAG-TGCTGGGATTACAGGCGTGAGCCACCGCGCCCGGCCTCCCTTCA
      *11111*1*1*1*11**111****1*11*111****1111*111*1111111**1*1111*****22
```

```
left  NNNNNNNNNNNNNNNNNNNNNNNNNNNNNNNNNNNNNNNNNNNNNNNNNNNNNNNNNNNNNNNNNNNNNNN
chrom TTTTACTTTGGTAATTTTACCTATTAAGATTGTGAAGGAACTTGACATT-----
right TTTTACTTTGGTAATTTTACCTATTAAGATTGTGAAGGAACTTGACATT-----
      22222222222222222222222222222222222222222222222222222222222222222222
```

Other Simple Repeat Low Complexity DNA LTR LINE SINE

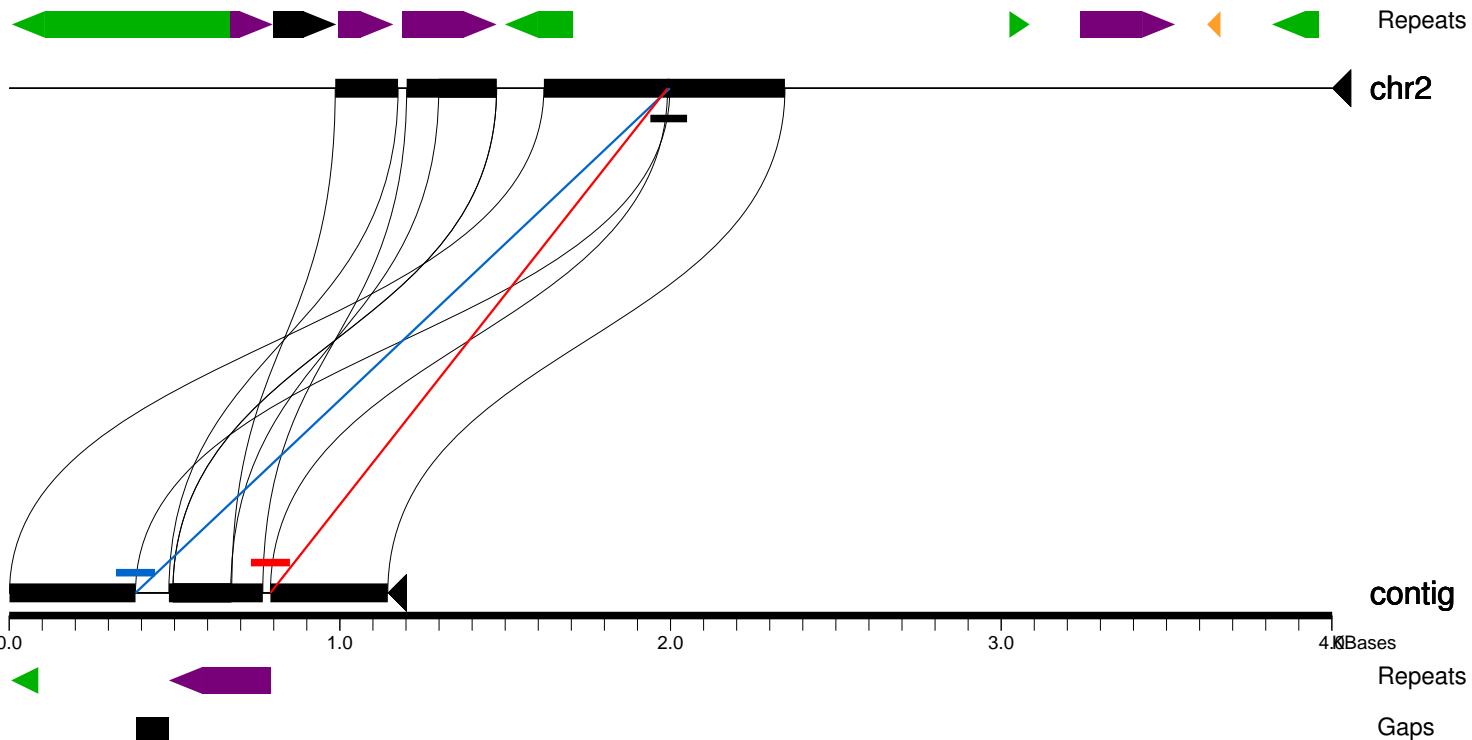



siteID: chr2\_176463782 Scaffitig1 + Breakpoint: chr2:176463793

chr2:176463765-176463852

Overlap Length: 32 INS size: 406 Genotyped: No

```

left  AG-----ATGCCAA-----GAATTGCAT-----ATGCATCATT-----ACAAACCGTTT
chrom AG-----ATGCCAA-----GAATTGCAT-----ATGCATCATT-----ACAAACCGTTT
right CTGCCCCGCTCGGCCTCCCAAAGTGCTGGGATTACAGGCGTGAGCCACCGCGCCCGGCCACAAACCGTTT
      11111111111111111111*1****1111111111*1***1**1111111111*11**1*11111111111******

```

```

left  TTAATTGTTACTTTGTTGAAANNNNNNNNNNNNNNNNNNNNNNNNNNNNNNNNNNNNNNNNNNNNNNNNNNNNNNNNNNN
chrom TTAATTGTTACTTTGTTGAAATCGAGCCCTCCTCATCTACTATCATGAA-----
right TTAATTGTTACTTTGTTGAAATCGAGCCCTCCTCATCTACTATCATGAA-----
      *****22222222222222222222222222222222222222222222222222222222222222222222222222

```

```

left  NNNNNNNNNNN
chrom -----
right -----
      22222222222

```

Other Simple Repeat Low Complexity DNA LTR LINE SINE

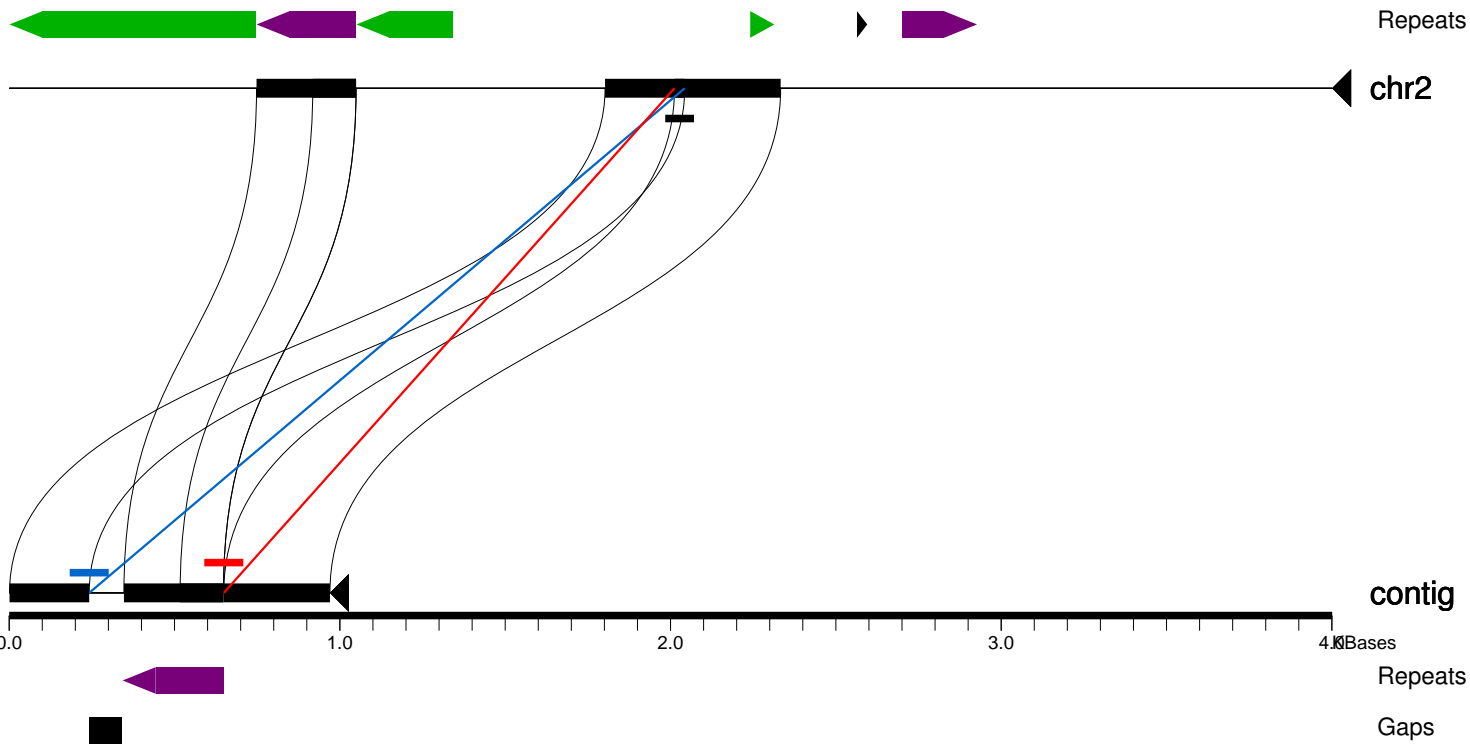



siteID: chr2\_178351181 Scafflig2 - Breakpoint: chr2:178351455

chr2:178351125-178351615

Overlap Length: 12 INS size: 462 Genotyped: No

```
left -----  
chrom TGCTGCCTTCCTTTGTAAATAGTGT'TTTTCAGGCAGAAAAAT'TGAAAAATCAGG'TTTTGGAAGTATGCAT'T  
right T-----TTAGTA-----  
2 22N222
```

```
left -----  
chrom GTTCAATTTGGGATTTGGAATTTTCAG--TTGATAGCAGGGGAATTAAGATCCATTAAAGTAGATGGTACAT  
right -----GAGACGGGGT'TTCACCTTGT'TAGCCAGG-----ATGGT-----  
22NNN22NN22222N1222N2222NN22
```

```
left -----  
chrom GGCTTATGATTTGTGCCAAAT'TCTTGATTGAATAATGAAT'TGGTTGCTTGTAAAT'TCTTCACTGTCATTTTA  
right --CT-----CGATCTCCTGACC---TCATGA-----TCCACCCGCCTC-----  
22 2N2NN22N2222NN 2N2222 2N2222NNN2N2N
```

```
left ----- GT'TGCT'TTTGAAATGGGAAACTGTAATTTTGGATA  
chrom TAGCACTTCCATCTTTGCAATATTTTTCAGATTCAAGTTGCTTTTGGAAATGGGAAACTGTAATTTTGGATA  
right --GGCTCCCA-----AAGT-GCT-----GGGA-----TT-----  
2NN22N222 22*1***111111111***111111111*111111111
```

```
left AATATCTTTTGGGAAAGAACATACATGACTGTTTCACAAATAGCAAAGTGGGCTATATGTATATATATATAT-  
chrom AATATCTTTTGGGAAAGAACATACATGACTGTTTCACAAATAGCAAAGTGGGCTATATGTATATATTTTATT  
right -----ACAGGCGTGAGC---CACC---GCGCCGGCCCTATATGTATATTTTATT  
111111111111111111111111***11*1***11111***11111*11111*11***111111111***2*2***2
```

```
left ---ATTTTT---  
chrom ACTATTTCTTACTGAAGGAAATAAATTAAGCAACCTTATACTAGCATTAGAAGGATTCTACTAAAAGTCTCT  
right ACTATTTCTTACTGAAGGAAATAAATTAAGCAACCTTATACTAGCATTAGAAGGATTCTACTAAAAGTCTCT  
222***2*22222222222222222222222222222222222222222222222222222222222222222222
```

```
left -----TNTTT-----TNTNNTNNNNNNNNNNN---  
chrom CATCCGATCTTTGTCCATGTGAGCAAGTATCCTCTTTCAATACTTCACTGCCTTGTGAGAAGCTAGAAAAG  
right CATCCGATCTTTGTCCATGTGAGGAAGTATCCTCTTTCAATACTTCACTGCCTTGTGAGAAGCTAGAAAAG  
22222222*2***222222222222N222222222222222222222222222222222222*2*22222N22222222
```

```
left --  
chrom GA  
right G-  
2
```

Other Simple Repeat Low Complexity DNA LTR LINE SINE

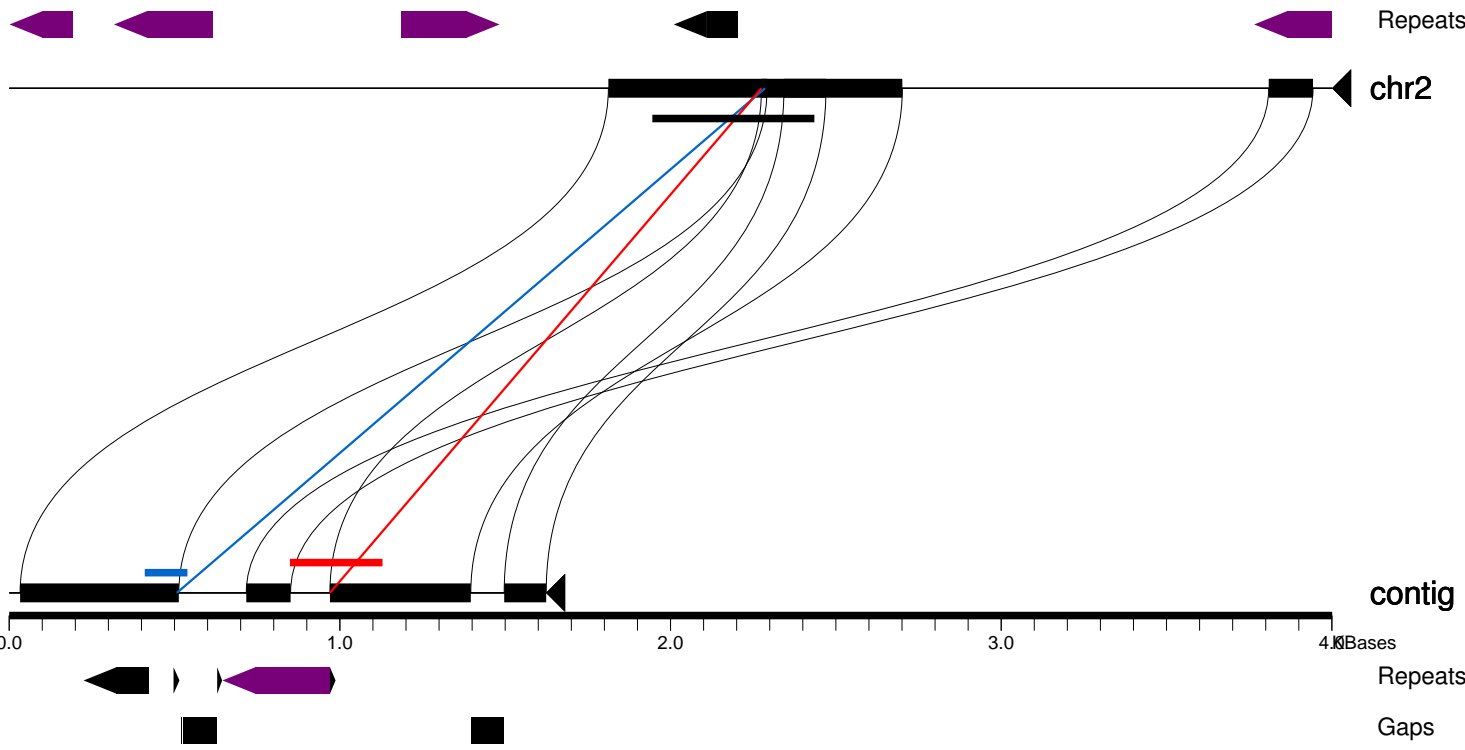

siteID: chr2\_178648963 Scafftig4 - Breakpoint: chr2:178648942

chr2:178648897-178649001

Overlap Length: 15 INS size: 297 Genotyped: Yes

```
left  AGCA--GGACT-----TGTTTCACA-----AGATACAGAC-CACAAAGACTGCTGATAAAACAGGATGT
chrom AGCA--GGACT-----TGTTTCACA-----AGATACAGAC-CACAAAGACTGCTGATAAACAGGATGT
right GCCACTGCACTCCAGCCTGGGCGACAGAGCGAGACTCCGTCTCAAAAAAAAAAAAAAAAAACGAACAGGATGT
      11**11*1***111111**1111***11111***11*1*1*1**1***1*111111*11*****
```

```
left  GGTAGGCCGGGCGCGGTGGCTCACGCCTGTAATCCAGCACTTTGGGAGGCCGAGGCGGGCGG
chrom GGTAAAGAAGTC-----TGCCAAAACCTG-----CCAAAACCAA--GATGGCTATGAAAAC--
right GGTAAAGAAGTC-----TGCCAAAACCTG-----CCAAAACCAA--GATGGCTATGAAAAC--
      ***22222*2*222222**22*22***22222***22**22222**2*2*2*2*2222*22
```

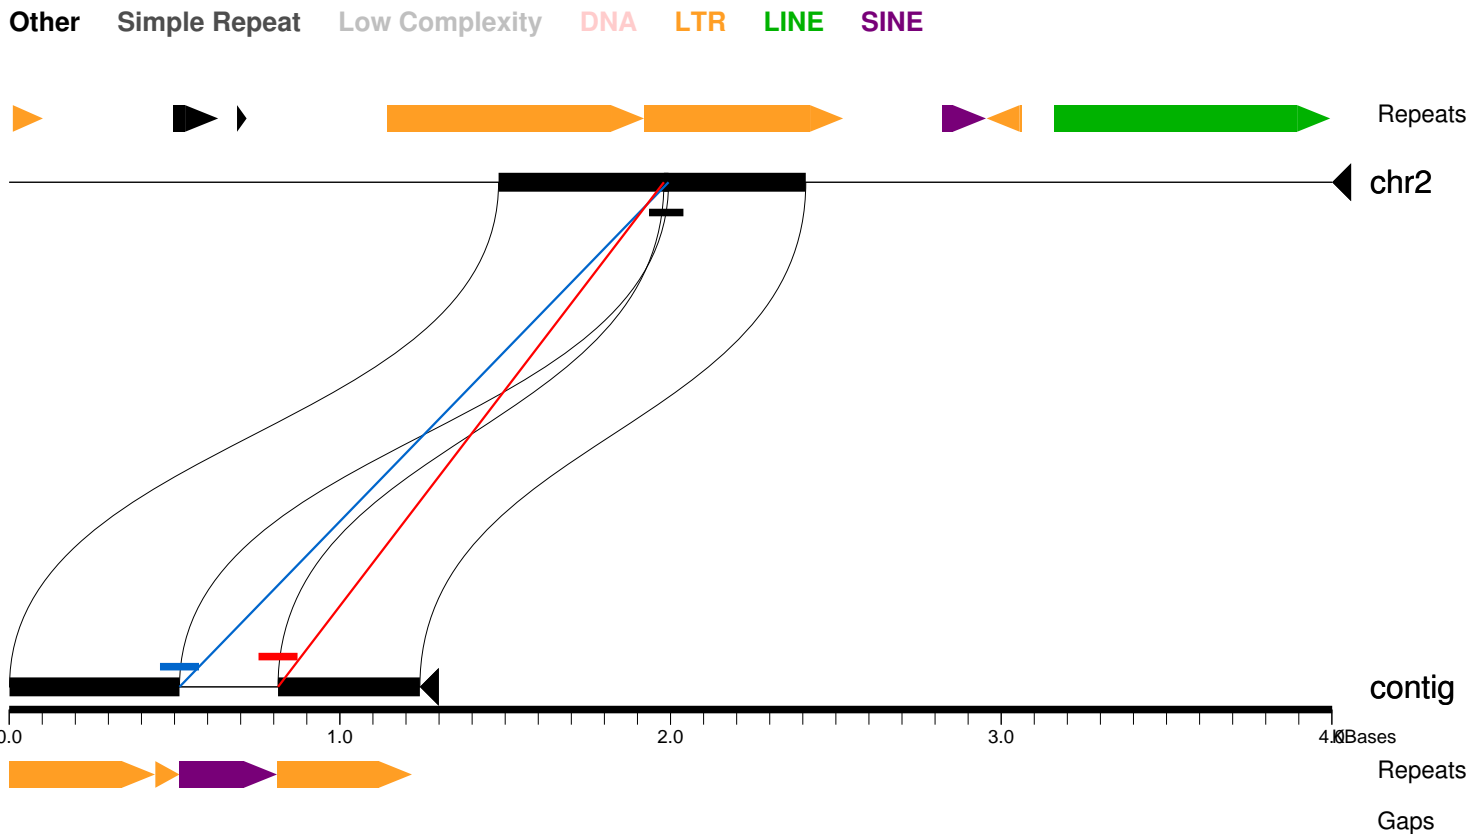

siteID: chr2\_181372095 Scafftig1 - Breakpoint: chr2:181372059  
 chr2:181372013-181372118  
 Overlap Length: 13 INS size: 161 Genotyped: Yes

```

left  ---AC---TGTGTACTIONAGGA---TACACTACATGTATT---TACAAATTCCTTCTTCAATAATAAACT
chrom ---AC---TGTGTACTIONAGGA---TACACTACATGTATT---TACAAATTCCTTCTTCAATAATAAACT
right GAAACCCCGTCTCTACTAAAAAAAAATACAAAAAAAAAAAAAAAAAATAATAATAATAATAATAATAATAAACT
      111**1111*1*1****1*11*111****11*1*111*11111**11***11*111111*****
left  TGGGGCCGGGCGCGGTGGCTCACGCTTGTAAATCCCAGCACTTTGGGAGGCCGAGGCGGGCGG
chrom TG-----GCTTACTG--TAACTTTTTTACTTAAATAAACTTTTTAAATTTTTTAACTT----
right TG-----GCTTACTG--TAACTTTTTTACTTAAATAAACTTTTTAAATTTTTTAACTT----
      **2222222**2222**22*2**22**2**2*222222*****222*22222*22*222222
  
```

Other Simple Repeat Low Complexity DNA LTR LINE SINE

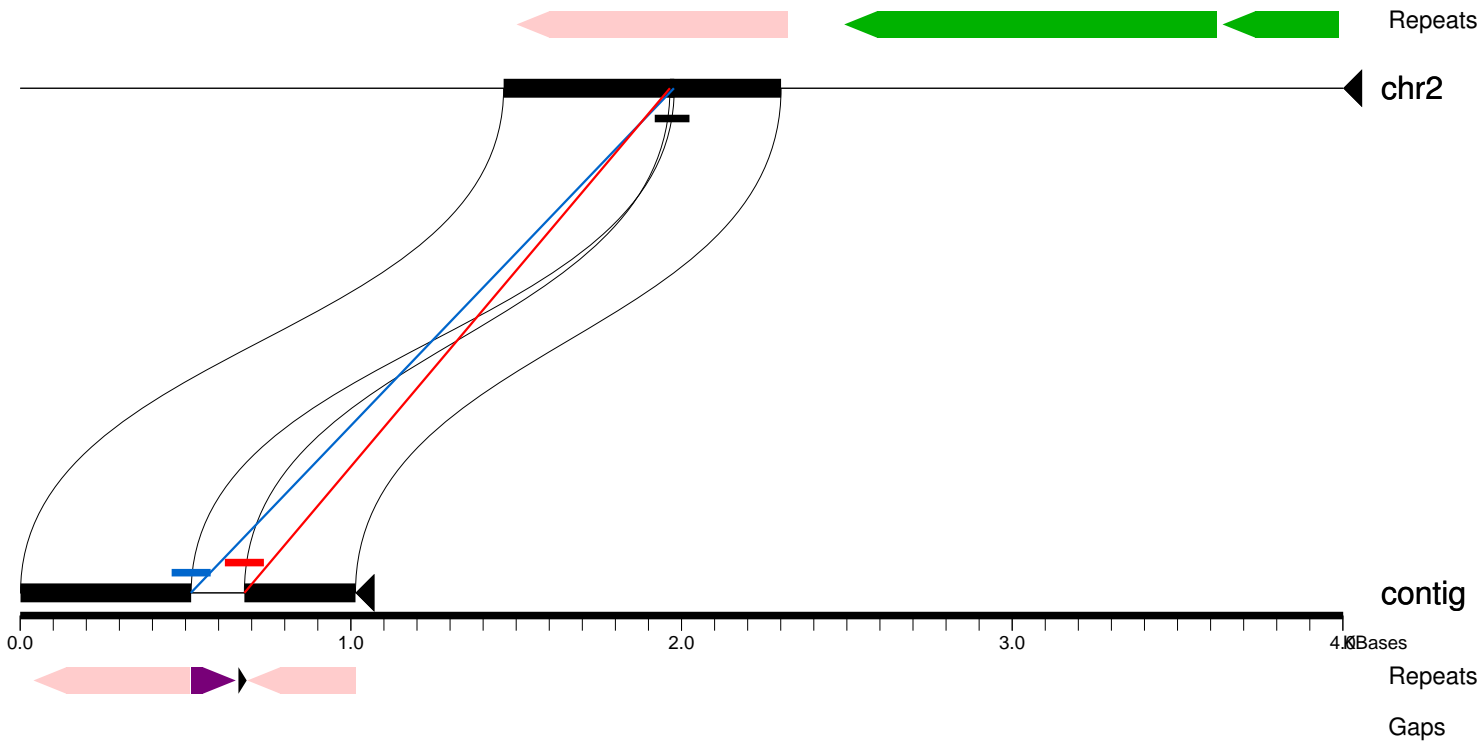

siteID: chr2\_181880734 Scafftig3 - Breakpoint: chr2:181880731

chr2:181880586-181881007

Overlap Length: 16 INS size: 294 Genotyped: Yes

```
left  -AGCAATTTATAGCTAACTATGCTGCAAGTGCCCAAAGTAGAACTGGGTACTCTTCTCACCAGCAAATG
chrom CAGCAATTTATAGCTAACTATGCTGCAAGTGCCCAAAGTAGAACTGGGTACTCTTCTCACCAGCAAATG
right CAG-----TGAGCCGAGATCCC-----GCCACTG-----CACTCCAGC-----
      2**11111111111111111111**111*1**11***111111*11****1111111111*1*1*****111111
```

```
left  TTGTTTCTGTTATATAGTACCATGGAGCATGTTAGAGCAATGAGAATGAGTC-CAGAGTAATTAGCCATG
chrom TTGTTTCTGTTATATAGTACCATGGAGCATGTTAGAGCAATGAGAATGAGTC-CAGAGTAATTAGCCATG
right -----CTGG-----GC--GACAGAGC--GAGACTCCGTCTCAAAAAA-----
      1111111***11111111111111111111**11*11*****1111***1*11***1**1*11**11111111111
```

```
left  AAGATTAAAAATTTGTTCAATTC-----GG-----CGG
chrom AAGATTAAAAATTTGTTCAATTC AACTAGCTTTATAAAGTTATAGGAAATTTTAGAAAAGATAAAAAAACC
right AAAAAA AAAATTTGTTCAATTC AACTAGCTTTATAAAGTTATAGGAAATTTTAGAAAAGATAAAAAAACC
      **1*11***** *22222222222222222222**22222222222222222222**2
```

```
left  GGCGC-----GG-----TGGCTCACGCTGTAATC----CCAG----CACTTTGGGAGGCC----
chrom CATGCTACTTCTGGCATTTCATATGGCAGAC-CTTGAAATAAAATACTAGTGAACAATGTAGTGGGCCCAGGT
right CATGCTACTTCTGG-----
      222**2222222**          1111NN1121N11N111N       1N11       11N1N1N1NN1111
```

```
left  -----GAGGCGGGCG--GAT--CACGAGGTCAG---GAGATCGAGACCATC
chrom TTCAAATAACTGAATTTTAACCCCTGAATCTGCCACTGATTTCACTTTGTGAGCCTGGGCAAGACACTAAC
right -----
      11NN1N1N1N   111   111NNN11N11   1N1NNN11N11N1N1
```

```
left  C-----CGGCTAAA-AC-----GGTGAACCCCGTCTCT-----ACTAAA-----
chrom CTTTACCTTCTTTATACCTTTTTGGGGTTTAAATTTTTTTTAAATTTTTTTAGTACAGACAGGATCTC
right -----
      1       1NN11NN1  11       111NN11NNNNN1N1N1       1N11N1
```

```
left  ----
chrom ACTG
right ----
```

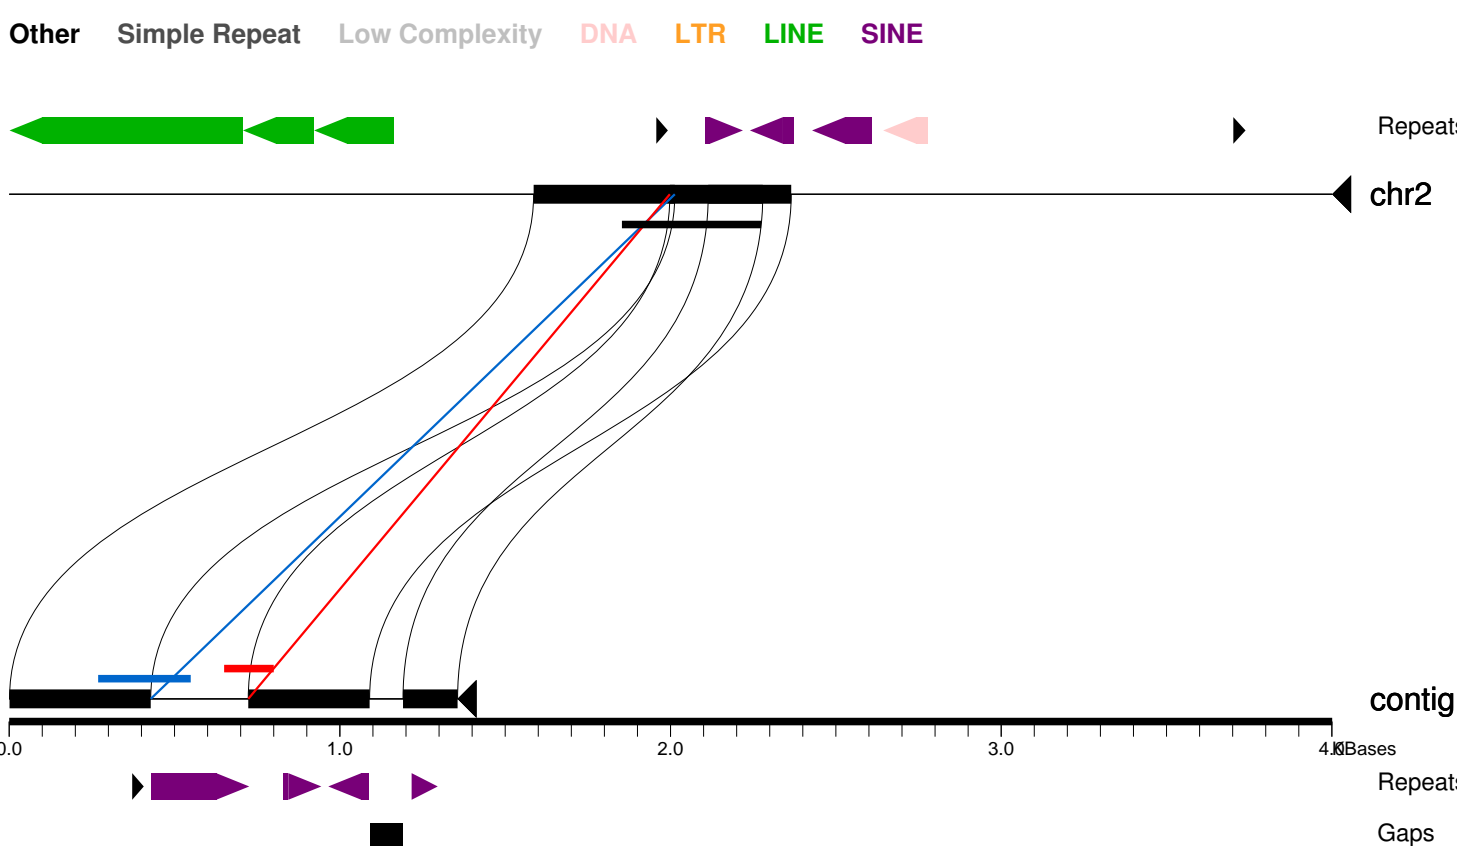

siteID: chr2\_182262190 Scafftig1 - Breakpoint: chr2:182262185

chr2:182262025-182262360

Overlap Length: 16 INS size: 294 Genotyped: Yes

```
left -----ACAAGTCTACTCTCTGAGGAAGCTAGAAGAGCATAATTTCTCATCAAGAGGTAGCA
chrom CCTGGAAGATCTTTTACAAGTCTACTCTCTGAGGAAGCTAGAAGAGCATAATTTCTCATCAAGAGGTAGCA
right A---GAATGGCGTGAACCCG-----GGAGGCG----GAGCTT-----GCAGTG
N 222NNN2N2NN**11*111111111111***1**11111****1*1111111111111111*1**11
```

```
left AATCCCTATCATGCCTCCTTTTGCCTGCTGGAACCTTTAGAGGGAGAAAAGAGGAACAGGCATGACTGAAGA
chrom AATCCCTATCATGCCTCCTTTTGCCTGCTGGAACCTTTAGAGGGAGAAAAGAGGAACAGGCATGACTGAAGA
right AGCCGAGATCGCGCCAC----TGCA--CTCCAGCCT----GGGCGACAGAGCGAGACTCCGTCTCAAAAA
*11*1111***11***1*1111***111**11*1*1*1111***1**1****11*1*11*11111111*1*
```

```
left CAATAAGTAAAAAGAGCCAACAAGAAGGAATACAGAG-----TGGCTC-ACG--CCTGTAATCCCAGCA
chrom CAATAAGTAAAAAGAGCCAACAAGAAGGAATACAGAGCCAAAACGTGGCCAGATGAACATGTGCCACGGGA
right AAAAAAAAAAAAAAAAAAAAAAAGAAGGAATACAGAGCCAAAACGTGGCCAGATGAACATGTGCCACGGGA
1**1**11****1*111**1*****1*222222****222*2*22*2***222*2*2*2*
```

```
left CTTTGGGAGGCCGAGGCGGGCGGATCACGAGGTCAGGAGATCGAGACCATCCTGGCTAA---CACGG---
chrom ATATGTGGGCATACTGAGTGGCCAGCGCCACCACAGAGGCTCTAAGCCTATCAAGCTAAAAGTCACGTACC
right ATATGTGGGCATACTGAGTGGCCAGCGCCACCACAGAGGCTCTAAGCCTATCAAGCTAAAAGTCACGTACC
2*2**2*2*222222*2*2*222*2*2*222***22*2**2*22**22*22*****222****2222
```

```
left TGAAACCC-CGTCTCTAC-----TAAA-AAT-ACAAAA-----A
chrom TCAAGCCCTCTTCTTTACAGATGGCATCTAAAAGAAATGACAAGACTCACCCAATTCA
right TCAAGCCCTCTTCTTTACAGATGGCATCTAAAAGAAATGACAAGACT-----
*2**2***2*2***2***2222222222****2***2***2***2*22 1
```

Other Simple Repeat Low Complexity DNA LTR LINE SINE

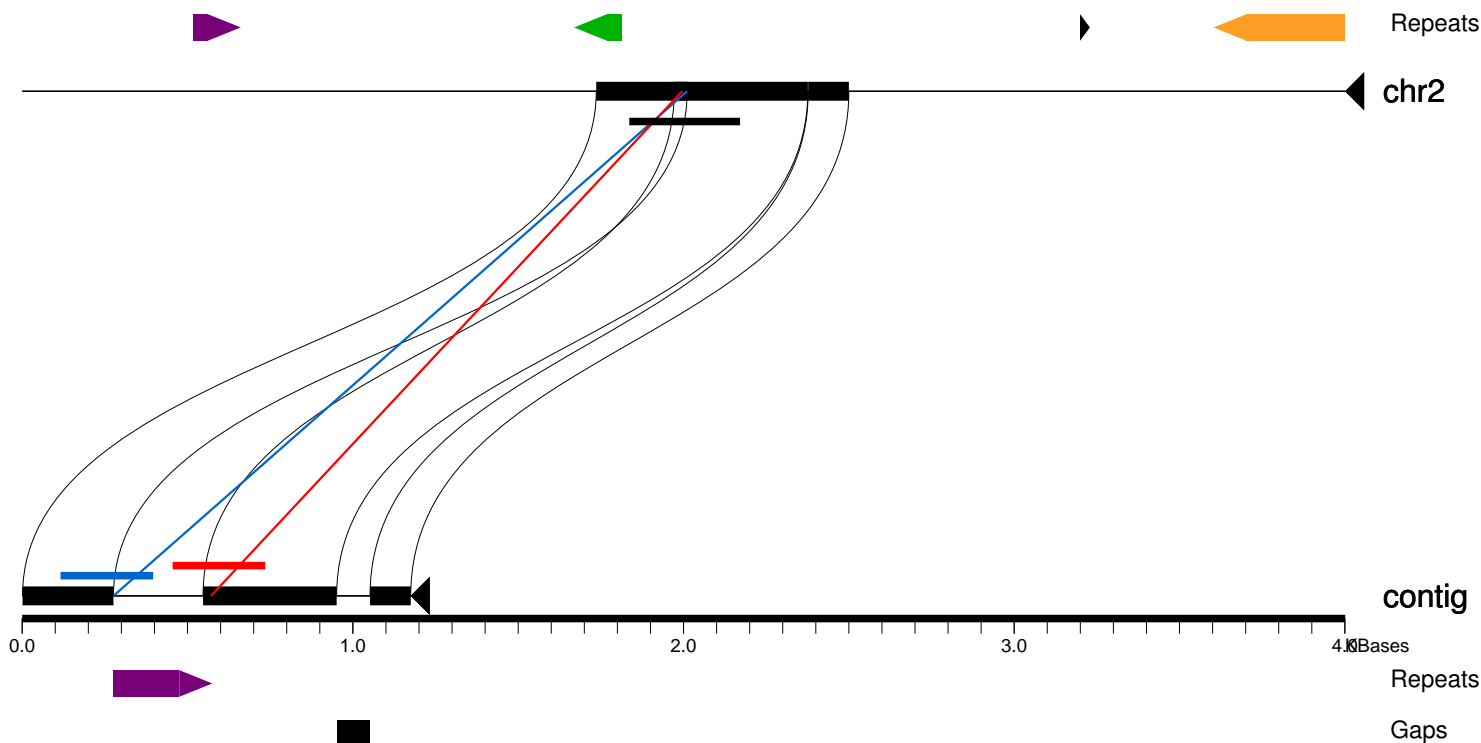











siteID: chr2\_194566526 Scafftig2 - Breakpoint: chr2:194566519  
 chr2:194566476-194566575  
 Overlap Length: 17 INS size: 325 Genotyped: Yes

```

left   TAG--GTTTGGTTT--CCTCCC----TTCTGTGTTT-CAGTCCTTGGCA-----GCTGGCTGGAG
chrom  TAG--GTTTGGTTT--CCTCCC----TTCTGTGTTT-CAGTCCTTGGCA-----GCTGGCTGGAG
right  GATCCGCCCGCCTCGGCCTCCCAAAGTGCTGGGATTACAGGCGTGAGCCACCGCGCCCGGCCGGCTGGAG
      1*111*111*11*111*****1111*1***1*1**1***1*1*11**111111111111**1*****
left   GTTTTTTTTTTTTTTTTTTTTTTTTTTTTTTTTTTTTTTTTTTTTTTTTTTTTTTGAGACGGAGTCTCGC
chrom  GTTTTTTTTCCCCGTCATCAGAATATCGAAATAGGTAATATATAATGTA-----
right  GTTTTTTTTCCCCGTCATCAGAATATCGAAATAGGTAATATATAATGTA-----
      *****22222*22*22222*2*22222*222*22*2*2*22*2*22222222222222222222
  
```

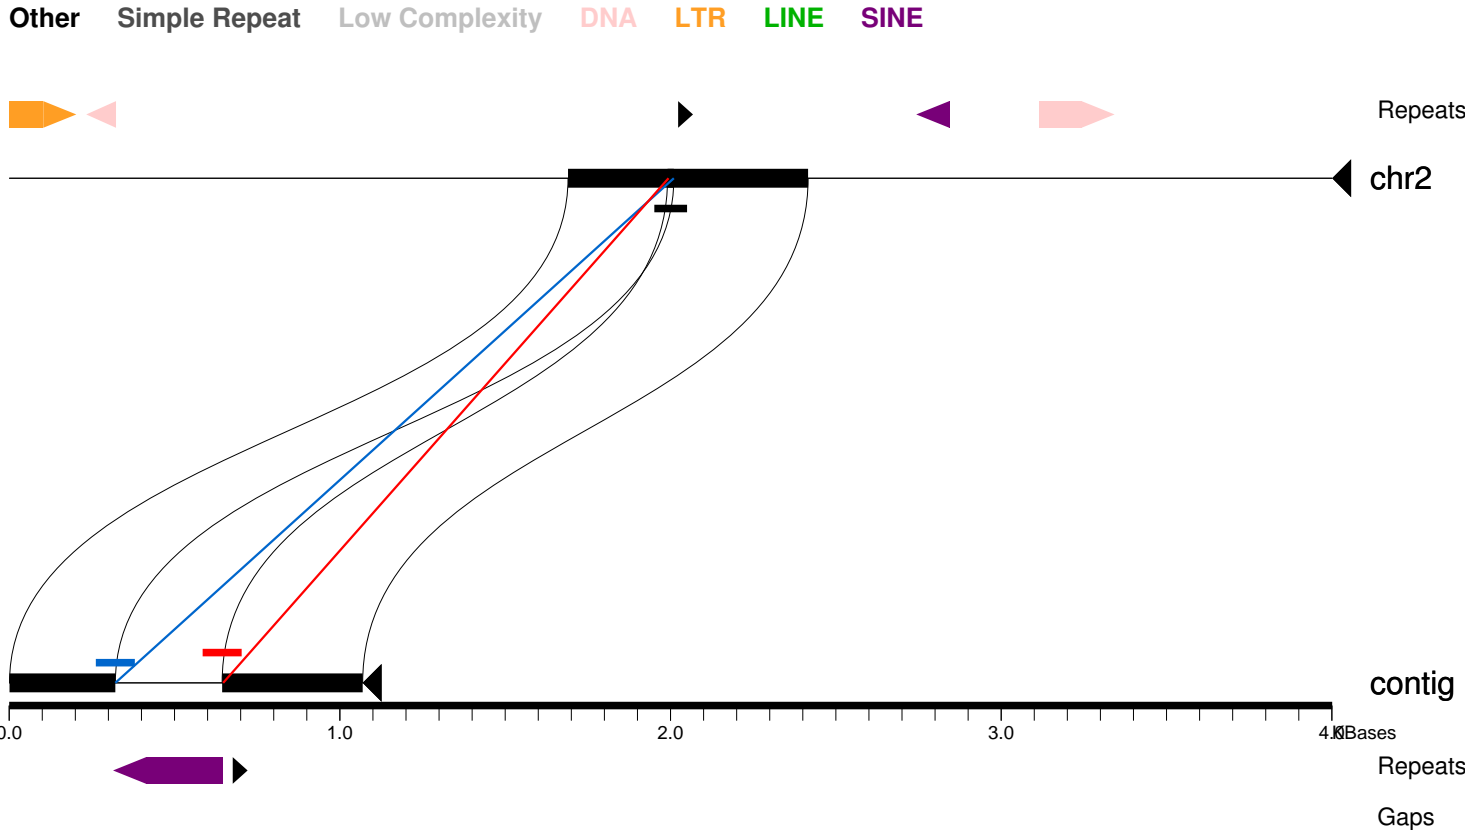

siteID: chr2\_195611726 Scaffitg1 - Breakpoint: chr2:195611646

chr2:195611505-195611855

Overlap Length: 69 INS size: 432 Genotyped: No

```

left  A-----
chrom ATTTTGTTCCTTTTCTGGTTTAGCCTTATGCCAAGAAAAATAAATACATGTATAGTAAAAGAAAAAG
right NNNNNNNNNNNNNNNNNNNNNNNNNNNNNNNNNNNNNNNNNNNNNNNNNNNNNNNNNNNNNNAA-----
      1NNNNNNNNNNNNNNNNNNNNNNNNNNNNNNNNNNNNNNNNNNNNNNNNNNNNNNNNNNNN22
  
```

```

left  -----CCCCATCTGAGGCTTAAAAATGTTATTTAAACATTTTAAA
chrom CTTACTAGATATATGGACTTTTAAAAATCTACCCCATCTGAGGCTTAAAAATGTTATTTAAACATTTTAAA
right -----
      11111111111111111111111111111111111111111111111111111111111111111111
  
```

```

left  TAATATGAACAAACATTTAGAATATTAGATATCATTACAGAAAAATTTATTACATTAATAAACTTGTTC
chrom TAAATATGAACAAACATTTAGAATATTAGATATCATTACAGAAAAATTTATTACATTAATAAACTTGTTC
right ---TATGAACAAACATTTAGAATATTAGATATCATTACAGAAAAATTTATTACATTAATAAACTTGTTC
      111*****
  
```

```

left  -----GGCCGGCG-----CGGTGG-----CT
chrom TAAAAATTCCTAAAAATAGCAAATCATGGCTTTGCTATTCTTAAATGTTTCTGTGAAATTTTCT
right TAAAAATTCCTAAAAATAGCAAATCATGGCTTTGCTATT-----1N1N111      11
      22222222222222222222222222222222222222222222222222222222222222222222
  
```

```

left  C---ACGCCTGTAA---TCCCAGCAC-----TTTGGGAGGCCGAGGC-----GGGC
chrom CTATAACAAACTTAAAAAAGTCAGATAAGAAAAATTATTAAATGTTTGTGAGGA-GAGGGTAGGAAAGTGA
right 1      11NNNN111      11NN1NN1N      1111N1111N21111N      1N1N
  
```

```

left  GG
chrom GT
right --
      1N
  
```

Other Simple Repeat Low Complexity DNA LTR LINE SINE

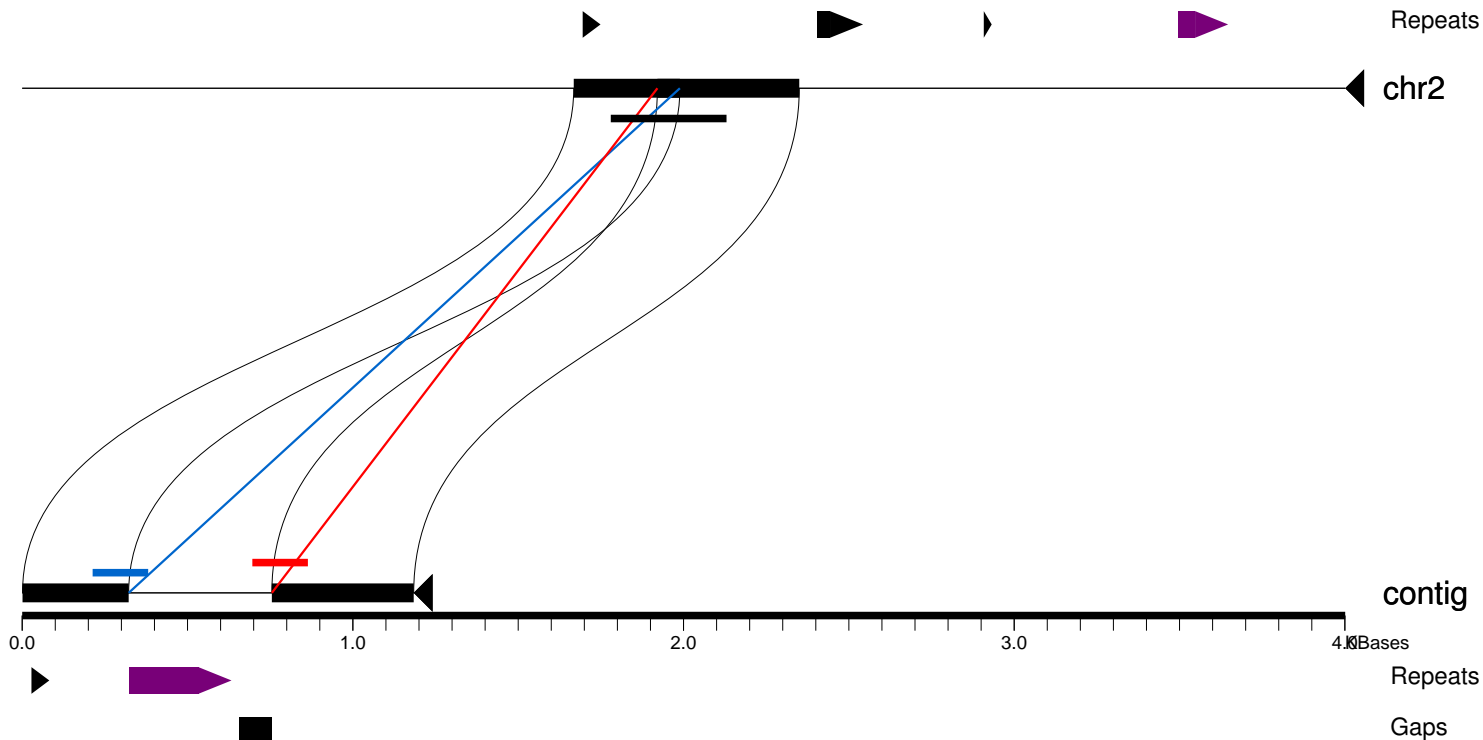

siteID: chr2\_196017598 Scafftig1 - Breakpoint: chr2:196017574

chr2:196017530-196017633

Overlap Length: 16 INS size: 311 Genotyped: Yes

```
left  CGCA---ATTGTCCTTT--ATGTTCT---ATT----TATTCAACACCCAAGCGCAT---AGTCTCACAAC
chrom CGCA---ATTGTCCTTT--ATGTTCT---ATT----TATTCAACACCCAAGCACAT---AGTCTCACAAC
right CGCCCGCCTCGGCCTCCCAAAGTGCTGGGATTACAGGCCTGAGCCACCGCGCCCGGCCAAGTCTCACAAC
***11111*1*1***1111*1**1**111***1111111*1*1*11**11**N*11111*****
```

```
left  ATTTTFFFFFFFFFFFFFFFFFFFFFFFFFFFFFFFFGGAGACGGAGTCT---CGCTCTGTCGCCCAGGCTGGA
chrom ATTTTAAAGCTTTC-----AAACTGAAACTATCCCCACTAACACCTTCACCAAAA
right ATTTTAAAGCTTTC-----AAACTGAAACTATCCCCACTAACACCTTCACCAAAA
*****22222***22222222222222222222*2**2**22**222*2*2**22*2**2222*222*
```

Other Simple Repeat Low Complexity DNA LTR LINE SINE

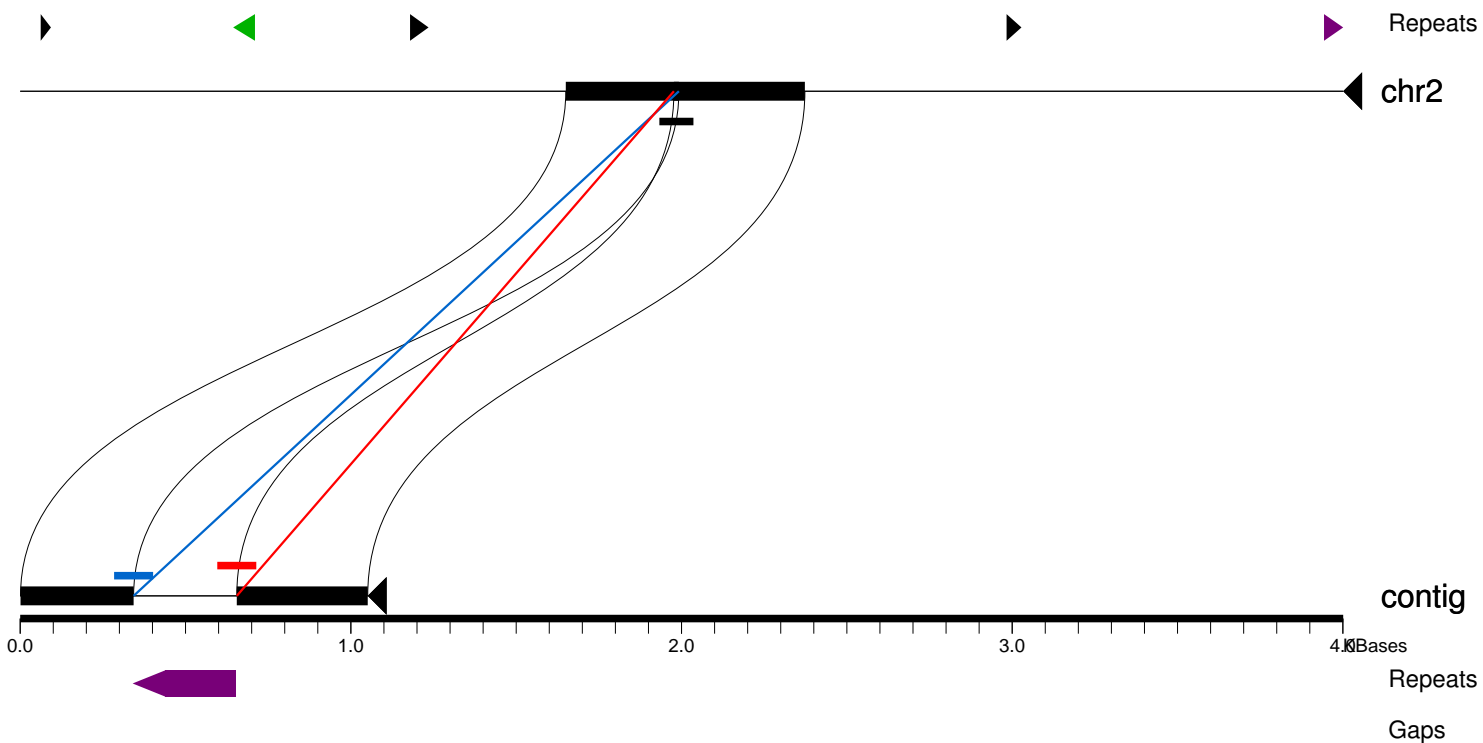

siteID: chr2\_19748398 Scaffitig10 - Breakpoint: chr2:19748402

chr2:19748357-19748461

Overlap Length: 15 INS size: 297 Genotyped: Yes

```
left  AGCC-CTGGGCTC-AGCCAGAG---CAGAGC-AGAGGACTGCC-----AGAGGATTAAGAGGGCAGA
chrom AGTC-CTGGGCTC-AGCCAGAG---CAGAGC-AGAGGACTGCC-----AGAGGATTAAGAGGGCAGA
right CGCCACTGCACTCCAGCCTGGGCGACAGAGCGAGACTCCGTCTCAAAAAAAAAAAAAAAAAAAAGAGGGCAGA
      1*N*1***11***1***1*1*111*****1***111*11*111111111*1*11*11*****
```

```
left  GAGAGGGCCGGGCGCGGTGGCTCACGCCTGTAATCCAGCACTTTGGGAGGCCAAGGCGGGCG
chrom GAGAAAATGGGACTA---GACAACCAGCTGCAA----AGAA-----GAGTACCCTCTCTGC-
right GAGAAAATGGGACTA---GACAACCAGCTGCAA----AGAA-----GAGTACTCTCTCTGC-
      ***22222**2*22222*2*222*22***2**2222**2*222222***22*N222222**2
```

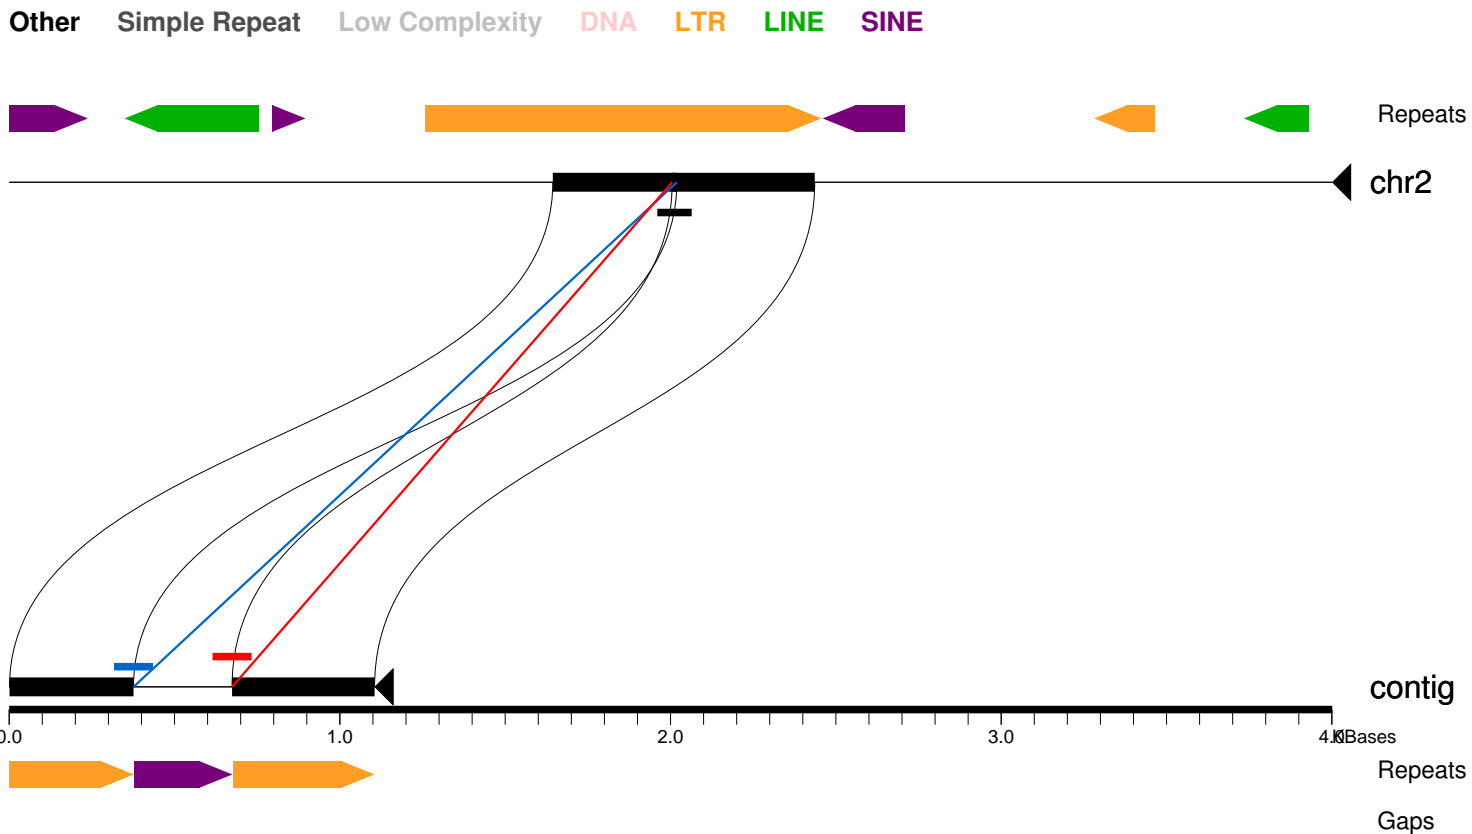

siteID: chr2\_197831249 Scafftig3 - Breakpoint: chr2:197831228

chr2:197831182-197831287

Overlap Length: 14 INS size: 457 Genotyped: No

```
left  -----ACAA-----CTTAATAGTATAAAATTAAT-ATAAATTTGGCTAATATGGTTCCC--AGGGCTAAT
chrom  -----ACAA-----CTTAATAGTATAAAATTAAT-ATAAATTTGGCTAATATGGTTCCC--AGGGCTAAT
right TGTTAGCCAGGATGGTCTCGATCTCCTGACCTCATGATCCACCCGCC--TCGGCCTCCCAAAGGGCTAAT
      11111111**11111111**11**1111*1*11*1**1**11*111**111*11*11*****11*****
```

```
left  TCTTTTTTTTNNNNNNNNNNNNNNNNNNNNNNNNNNNNNNNNNNNNNNNNNNNNNNNNNNNNNNNNNNNNNN
chrom TCTTT-----ACAGATGAAATAAACTGGAAAATGAAATGAGAGAGAATGTCATTTT
right TCTTT-----ACAGATGAAATAAACTGGAAAATGAAATGAGAGAGAATGTCATTTT
      ***2222222222222222222222222222222222222222222222222222222222222222
```

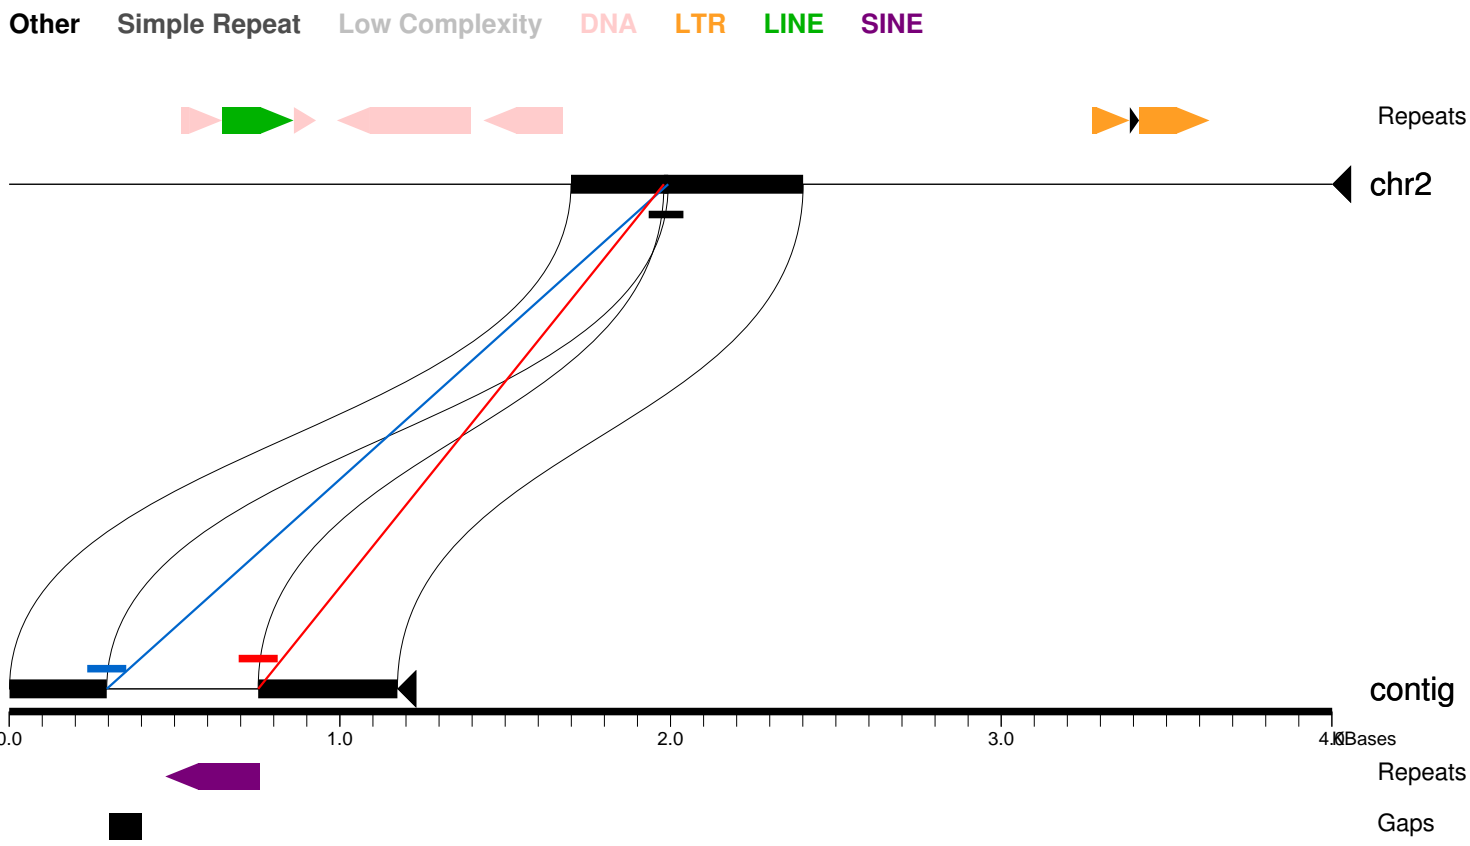

siteID: chr2\_198763471 Scaffitig6 + Breakpoint: chr2:198763449

chr2:198763403-198763505

Overlap Length: 14 INS size: 299 Genotyped: Yes

```
left  TTA----CAATACTTATAATTTATTAATATAAAATGTGT-----GTG-TGTATGTATTCCTAG
chrom TTA----CAATACTTATAATTTATTAATATAAAATGTGT-----GTG-TGTATGTATTCCTAG
right ATGGTCTCGAT-CTCCTGACCTCGTGATCCGCCCGCCTCGGCCTCCCAAAGTGCTGGGATTACTTCCTAG
      1*111111*1**1**11*1*11*11*1**111111*11*111111111111***1**1111**1*****
```

```
left  TTTCTTTCTTTTTCTTTTTCTTTTTCTTTTTTTTTTTTTTTTTTTTTTGGAGACGGAGTCTCGCTCTG
chrom TTTCTTTAGTCCTTGAC--TCAAATACCCTGTGTTC-----GAACCTGA---ACTCTGAT
right TTTCTTTAGTCCTTGAC--TCAAATACCCTGTGTTC-----GAACCTGA---ACTCTGAT
      *****22*22**22222**222*22*2*2*2**22222222222**22*2**2222*2**222
```

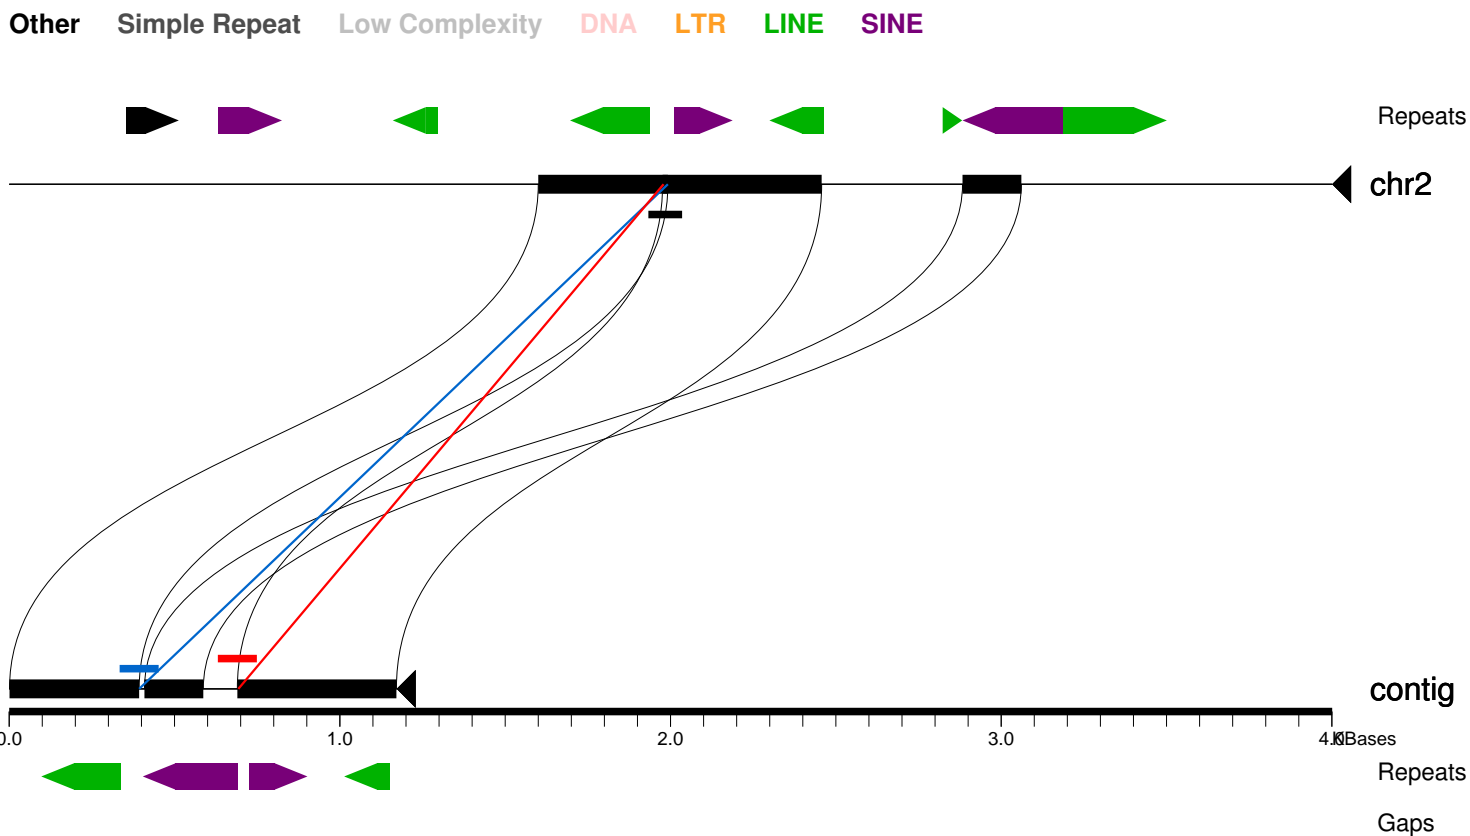

siteID: chr2\_199988319 Scafftig2 - Breakpoint: chr2:199988325

chr2:199988279-199988384

Overlap Length: 14 INS size: 408 Genotyped: No

```

left   AGCTATTTAGCTTACAAAATGGACCAGCCATTTAGTCCATCCCTAA-----AGAACTGGGGG
chrom  AGCTATTTAGCTTACAAAATGGACCAGCCATTTAGTCCATCCCTAA-----AGAACTGGGGG
right  NNNNNNNNNNNNNNNNNNNNNNNNNNNNNNNNNNNNNNNNNNNNNNNNNNNNNNNNNNNNNNN
      111111111111111111111111111111111111111111111111111111111111111111

```

```

left   TCCGGCCGGGCGCGGTGGCTCACTCCTGTAATCCCAGCACTTTGGGAGGCCGAGACGGGCGG
chrom  TCCTG-----GGAATTTAACCACGTCAATGCAGTCTTTTTTATA---CTAGTA--ACTA
right  TCCTG-----GGAATTTAACCACGTCAATGCAGTCTTTTTTATA---CTAGTA--ACTA
      **2*22222222**2222*2**22*222***2*222*22***222*22*2**2222*22

```

Other Simple Repeat Low Complexity DNA LTR LINE SINE

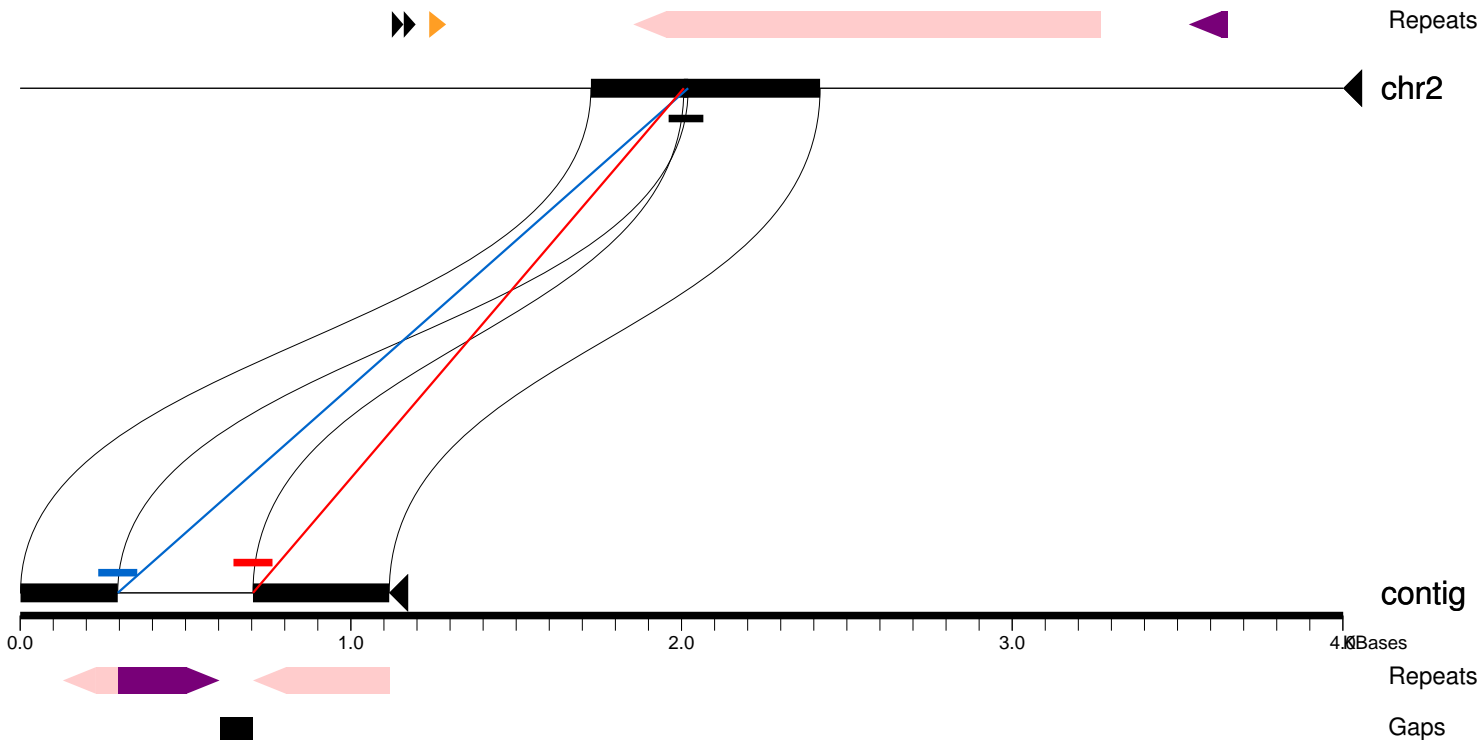



siteID: chr2\_20085235 Scaffitg1 - Breakpoint: chr2:20085237

chr2:20085077-20085409

Overlap Length: 13 INS size: 305 Genotyped: Yes

```
left -----TCTCCCCATTGAGGACCTCAGGCCCCAGTTTCATTATCAGGATTTTAGAAAATACCAAG
chrom CAATATGCTGGCTTCTCCCCATTGAGGACCTCAGGCCCCAGTTTCATTATCAGGATTTTAGAAAATACCAAG
right -----GGCGTGAACCC---GGGAAGCGGAGCTTGCAGTG----AGCCGAGATTGCGCCACTGCAG-
      222N*111***111*1*1*1*11**1111****11111*1*1*111**11*11*111**11
```

```
left AACATCAAAAAGAACAGAAAAGAGGCCCTTAAGGGACTCCTAATAAGATAGAATTTGCATGTCCTCATTGG
chrom AACATCAAAAAGAACAGAAAAGAGGCCCTTAAGGGACTCCTAATAAGATAGAATTTGCATGTCCTCATTGG
right ----TCCGCAGTCC-----GGCC--TGGGCGAC-----AGAGCGAGACTCCGTCTCAAAAAAAAA
      1111**111**11*11111111****11*11*1**11111111***11**111*1*1*1**111*1111
```

```
left ACTAGAACCTGAACTGCTTTAAAAAGCAAAGGGCCCGGGCGC-----GGTGGCTCACGCCTGTA-ATCC
chrom ACTAGAACCTGAACTGCTTTAAAAAGCAAAGGGCCCTTGGTACAATCTGATGGATGT-GACTGTACAGAG
right AAAAAAA----AA-----AAAAAACAAAAGGCCCTTGGTACAATCTGATGGATGT-GACTGTACAGAG
      *11*1**1111**11111111*****1*****22*22**22*22222*2***2*222*2*****2*222
```

```
left CAG-----CACTTT----GGGAGGCCGAGGCG--GTT--GGATCATGAGGTCAGGAGAT-CGAGACCA-
chrom AAGAGGAAAACACCTCTGAGGGGAGTGAGAGGCCCTTGGTAAGGAAGTTGCAATCTGGAGCCACCTGGGCAG
right AAGAGGAAAACACCTCTGAGGGGAGTGAGAGGCCCTTGGTAAGGAAGTTGCAATCTGGAGCCACCTGGGCAG
      2**222222***2*22222*****222*****222***22***222**222**2***222*22*22**2
```

```
left -TCCTGGCT----AACAGGTGAAACCCCGTCTCTACTAAA-----
chrom GTCAGAGCTCTATAAGCAGGAGAAGCCAAGGGCATAACACACAGTAGTGACAGGT
right GTCAGAGCTCTATAAGCAGGAGAAGCCAAGGGCATAACACACAGTAGTGACAG--
      2**222**2222**22***2***2**22*2222**22*2*22222222222
```

Other Simple Repeat Low Complexity DNA LTR LINE SINE

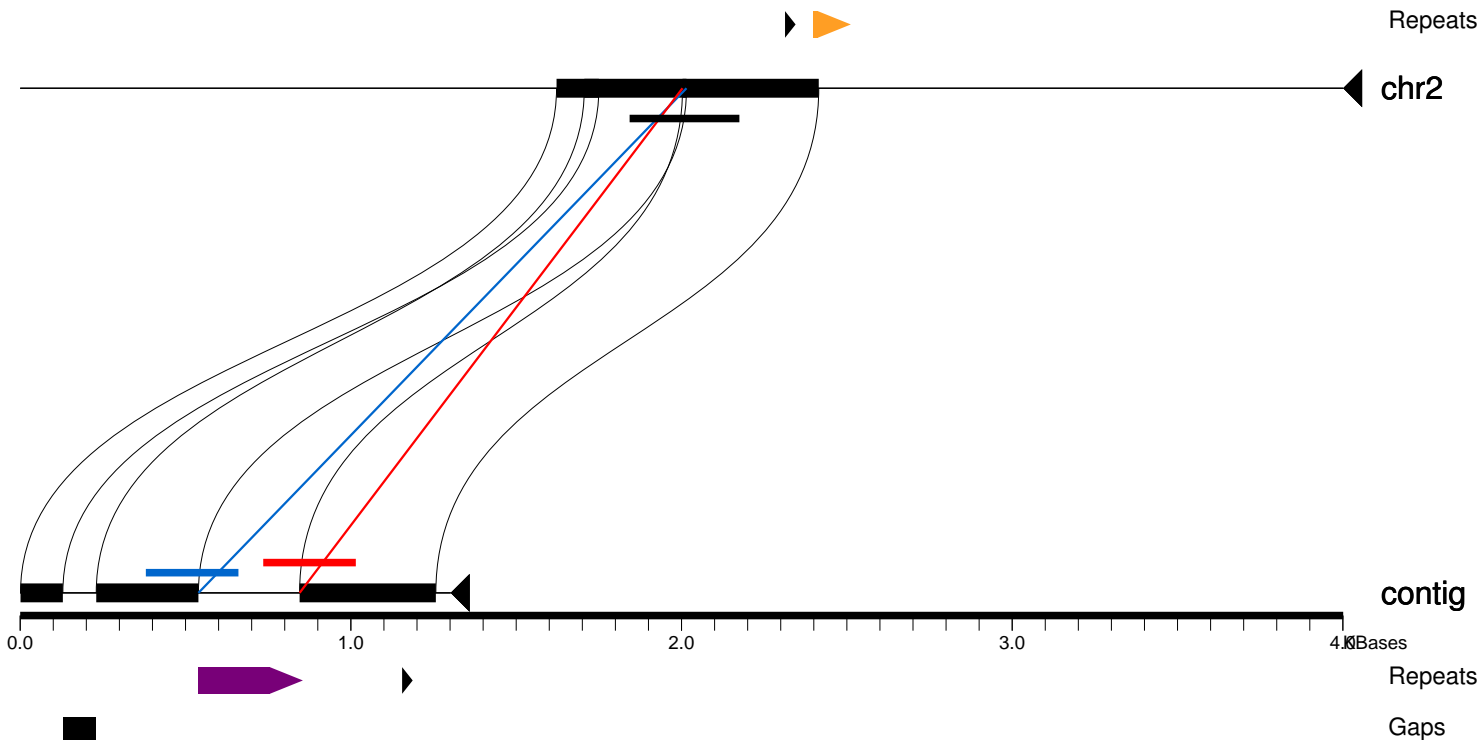

siteID: chr2\_201578949 Scafftig1 - Breakpoint: chr2:201578952

chr2:201578901-201579011

Overlap Length: 9 INS size: 424 Genotyped: No

```
left   TGCATGTGTATATACATACAGACATTTTGTGCTTTCTTTTATAAAAAGTA-----AAACATGTCGG
chrom  TGCATGTGTATATACATACAGACATTTTGTGCTTTCTTTTATAAAAAGTA-----AAACATGTC--
right  NNNNNNNNNNNNNNNNNNNNNNNNNNNNNNNNNNNNNNNNNNNNNNNNNNNNNNNNNNNNNNNNNNNNN
      11111111111111111111111111111111111111111111111111111111111111111111
      *-----*22

left   CCGGGCGCGGTGGCTCACGCCTGTAATCCCAGCACTTTGGGAGGCCGAGGCGGGCGG
chrom  -----CTTTAATGGACATTCGACAAATAC-AGAAGAATATAAAAAAGAAAATCAAAAT
right  -----CTTTAATGGACATTCGACAAATAC-AGAAGAATATAAAAAAGAAAATCAAAAT
      22222*222222*22**22*2222***2*2**2*222*222*22222*222222222
```

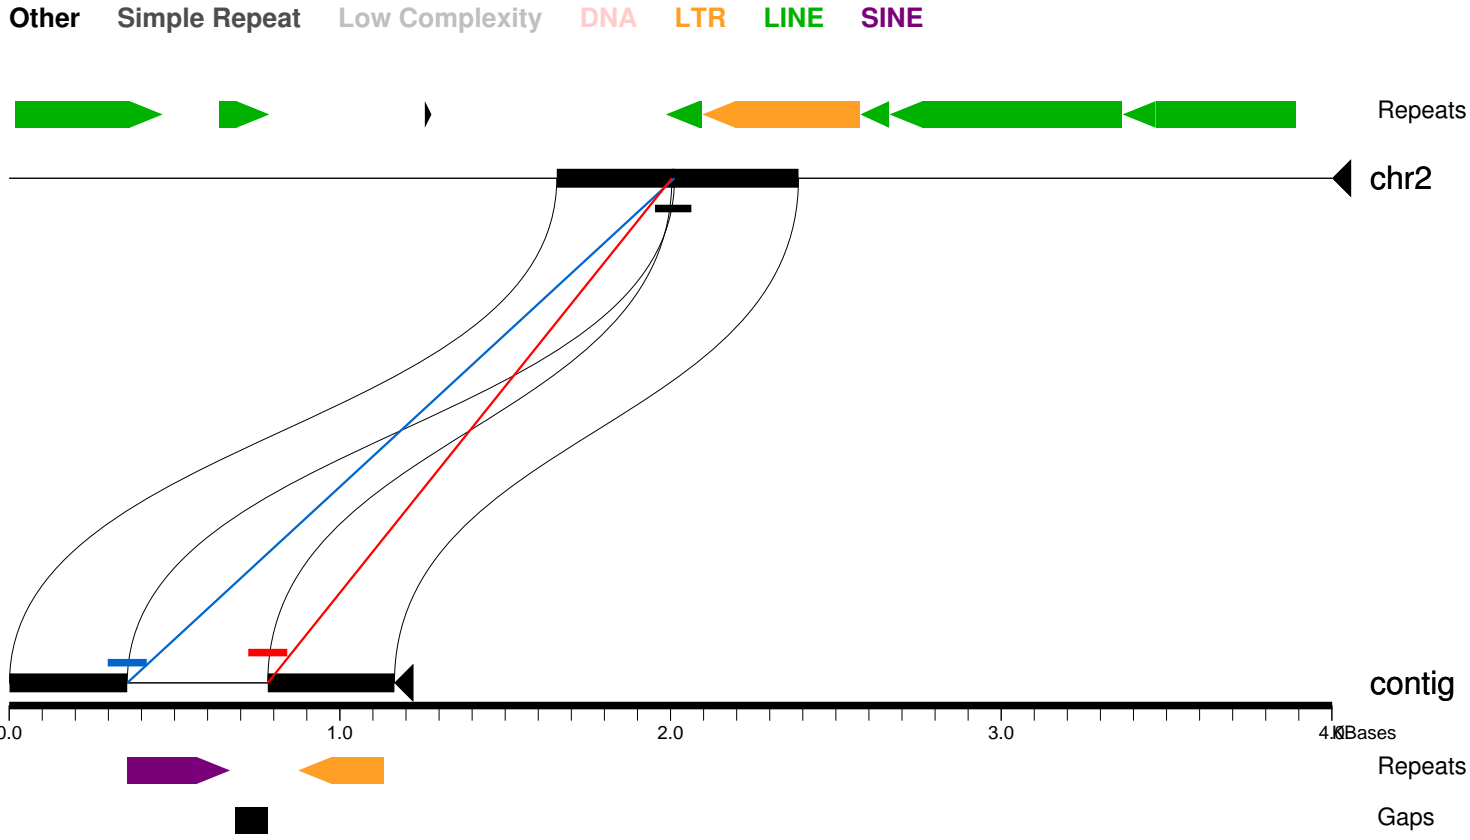



siteID: chr2\_207976903 Scafftig4 - Breakpoint: chr2:207976889

chr2:207976729-207977062

Overlap Length: 14 INS size: 309 Genotyped: Yes

left -----TTGTTATTCTGACAGTCTGCTGTCAACAAAGATGAAATACTCAAACAAAACCACCTCCCT  
chrom ACTTGCAAAGTTGTTATTCTGACAGTCTGCTGTCAACAAAGATGAAATACTCAAACAAAACCACCTCCCT  
right TTTAGTAGAGACGGGGTT-TCAC---CT--TGTTAGCCAGGATGGT---CTCGATCT-----CCTGAC-  
NN2N2N2N2211\*111\*\*1\*1\*\*111\*\*11\*\*\*1\*1\*1\*1\*\*\*\*11111\*\*\*1\*1\*1111111\*\*\*11\*1

left CTCAAAGTCAGAATATAAAAACTTGTCAAGTGACAAAGGGATATTCTGACTTCTGATGGTTCTTCATAAGT  
chrom CTCAAAGTCAGAATATAAAAACTTGTCAAGTGACAAAGGGATATTCTGACTTCTGATGGTTCTTCATAAGT  
right CTCATGATCC----ACCCGCCTCGGCC--TCCCAAAG-----TGCTGGGATTACAGGCCT  
\*\*\*111\*\*11111\*11111\*\*1\*1\*111\*11\*\*\*\*\*1111111111111111\*\*1\*\*\*111\*1\*\*111\*\*

left AAATGGCTAATTCATTTAAT-GGGCAAATGCTTTT-----TTTTTTTTTTT-----TTTTTTTTTTTGGAGAC---G  
chrom AAATGGCTAATTCATTTAAT-GGGCAAATGCTTTTGGAGTGATTAACAACCTGGTCCTTTTAACAGAGATAG  
right GA---GCCACCGCGCCCGGCCGGCAAATGCTTTTGGAGTGATTAACAACCTGGTCCTTTTAACAGAGATAG  
1\*111\*\*1\*111\*111111111\*\*\*\*\*\*222\*22\*\*22222\*22\*22\*\*\*222\*\*\*2222\*

left GAGTCTCGCTCTGTTGCCCAGGCCGAC-----TGCGGACTGCAGTGGC----GCAATCTCGGCTC  
chrom CAGAAATAATATTATACCCCTCTCTGTAAGTTTTTCTTTGATAACAAGATTTTTCTTTTGCAATTTGAGCAC  
right CAGAAATAATATTATACCCCTCTCTGTAAGTTTTTCTTTGATAACAAGATTTTTCTTTTGCAATTTGAGCAC  
2\*\*22222\*2\*22\*2\*\*\*222\*2\*2\*222222222\*222\*222\*2\*22\*2222\*\*\*\*\*2\*22\*2\*

left -----ACTGCAAGCTCCGCTTCCC-----GGGTTTCCAC---GCCATT-----  
chrom TACTAACGGCTAGCTG-GTTTCCTTTAGACAGGTGTTAACACTGCGATCTTCTCGC  
right TACTAACGGCTAGCTG-GTTTCCTTTAGACAGGTGTTAACAC-----  
22222\*\*2\*2\*\*\*22\*2\*\*\*222222222\*2\*\*\*2\*22 11N11N

Other Simple Repeat Low Complexity DNA LTR LINE SINE

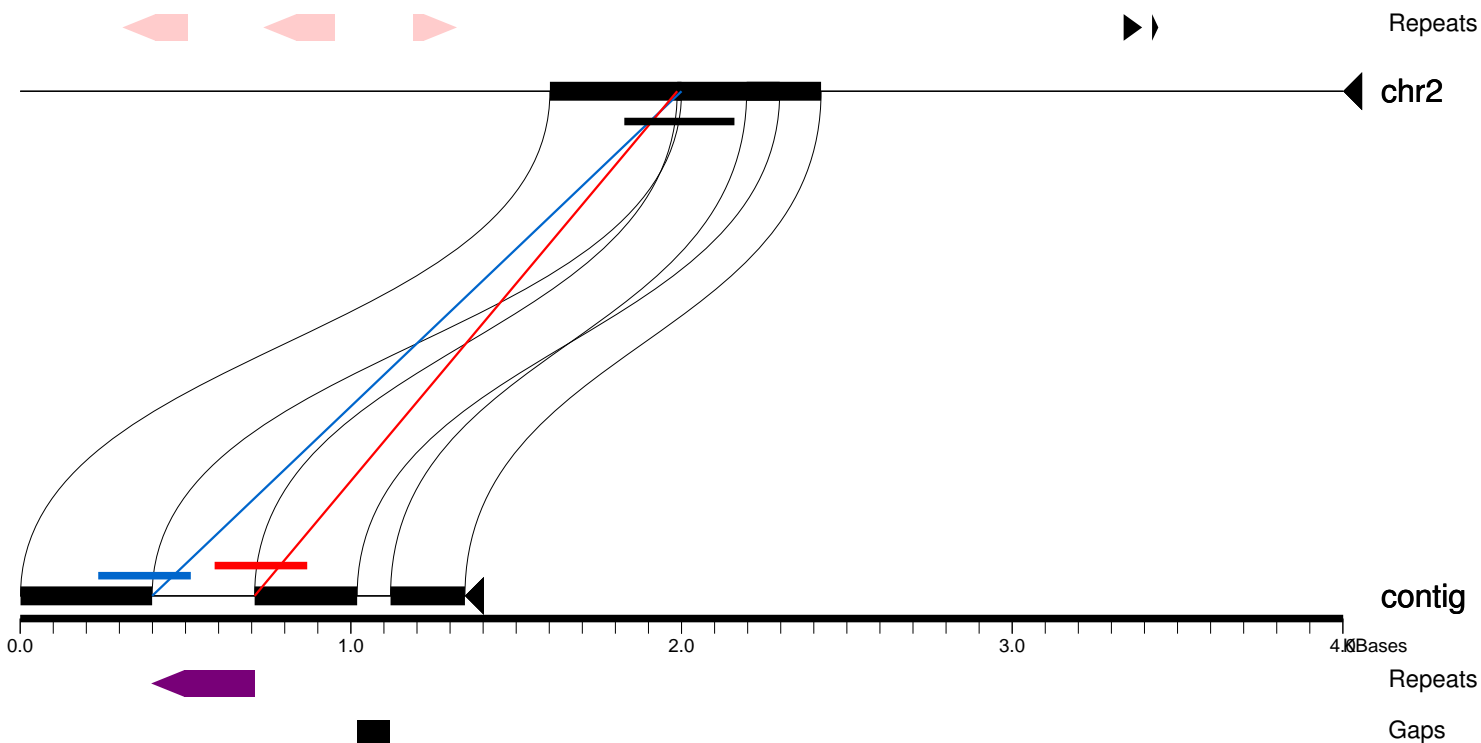

siteID: chr2\_210260740 Scafftig3 - Breakpoint: chr2:210260740

chr2:210260695-210260799

Overlap Length: 15 INS size: 297 Genotyped: Yes

```
left  CCCTTTGACCATATTACCAAG----AATATCTG--CTTTG-----AGAAGGATTTTAAAAACATTAT
chrom CCCTTTGACCATATTACCAAG----AATATCTG--CTTTG-----AGAAGGATTTTAAAAACATTAT
right GCCACTG-CAATCCGGCCTAGGCTAAAGAGCGGGACTCCGTCTCAAAAAAAAAAAAAAAAAAAAAAATAAACATTAT
      1**11**1*1**1111**1**1111**1*1*11**11*1111111111*1**11*1111*****
```

```
left  AACTAGGCTGGGCGCGGTGGCTCACGCCTGTAATCCCAGCACT--TTGGGAGGCCGAGGCGGGCGG
chrom AACTAAGAAAA-----TAGTTAGAGAAAGTACTTCATGTATAAAATTTGGATTAA-----
right AACTAAAGAAAA-----TAGTTAGAGAAAGTACTTTATGTATAAAATTTGGATTAA-----
      ***222222222222*2*2*222*222***2*2122*2*2222**2***222222222222222
```

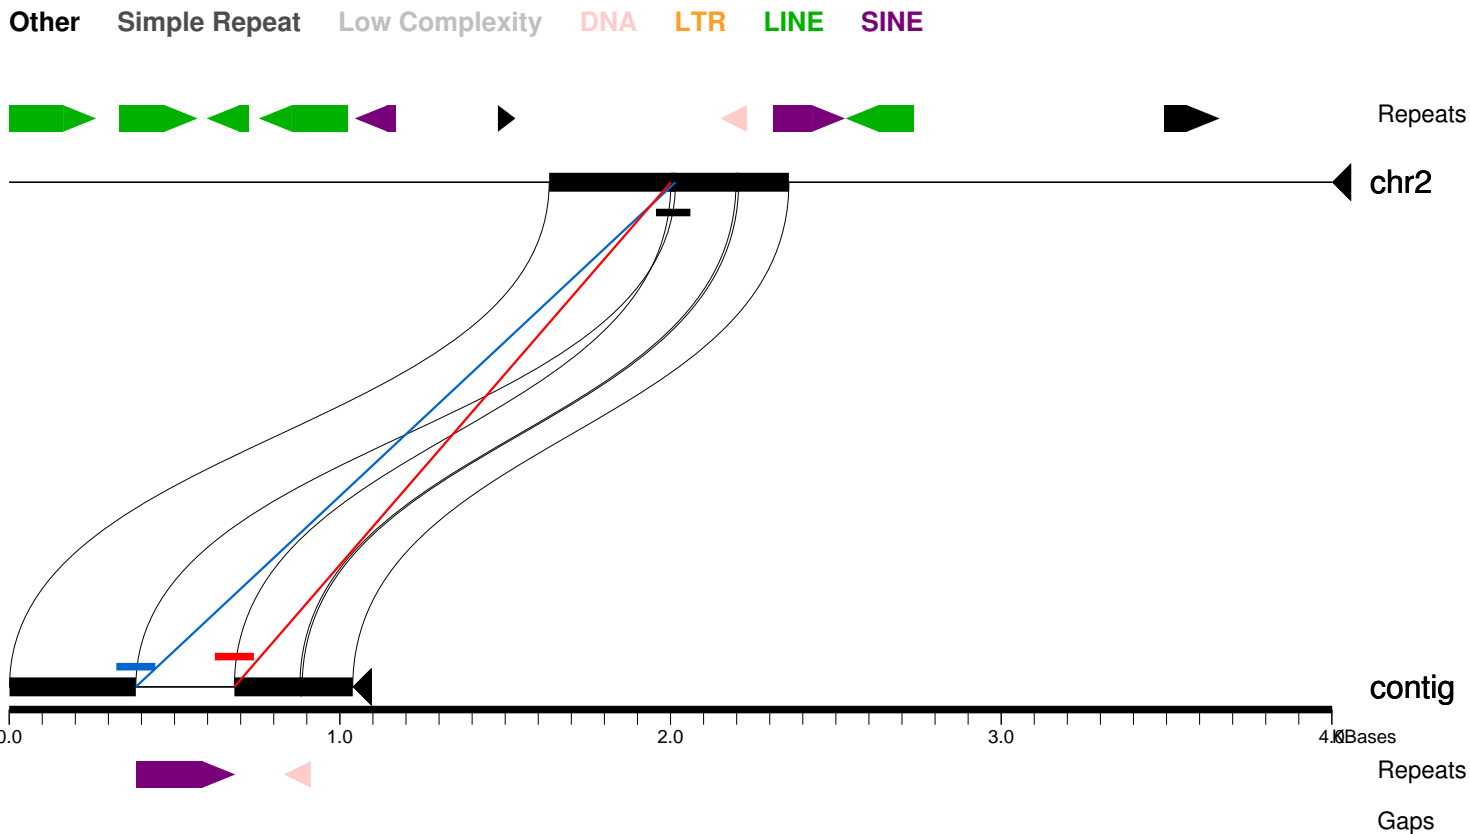

siteID: chr2\_212343412 Scafftig2 + Breakpoint: chr2:212343411  
 chr2:212343360-212343470  
 Overlap Length: 9 INS size: 429 Genotyped: No

```

left  CACTTGAATCTAC-TC----ACTTCTCTCCATCCCTGCTTT---CAACATCCTAATTCAAGCTCTTCTTT
chrom CACTTGAATCTAC-TC----ACTTCTCTCCATCCCTGCTTT---CAACATCCTAATTCAAGCTCTTCTAC
right CACCCGCCTCGGCCTCCCAAAGTGCTGGGATTACAGGCCTGAGCCACCGCGCCCGGCCAGCTCTTCTAC
      ***11*11*11*1*1**1111*1*1**11111*1*11**1*1111**1*111*11111*1*****22

left  TTTNNNNNNNNNNNNNNNNNNNNNNNNNNNNNNNNNNNNNNNNNNNNNNNNNNNNNNNNNNNNNNNNNN
chrom TT-----CTTGGGTGGAATACAACATATCCCCTAATTCTTCACAGCACCATCTT
right TT-----CTTGGGTGGAATACAACATATCCCCTAATTCTTCACAGCACCATCTT
      **222222222222222222222222222222222222222222222222222222222222222222
  
```

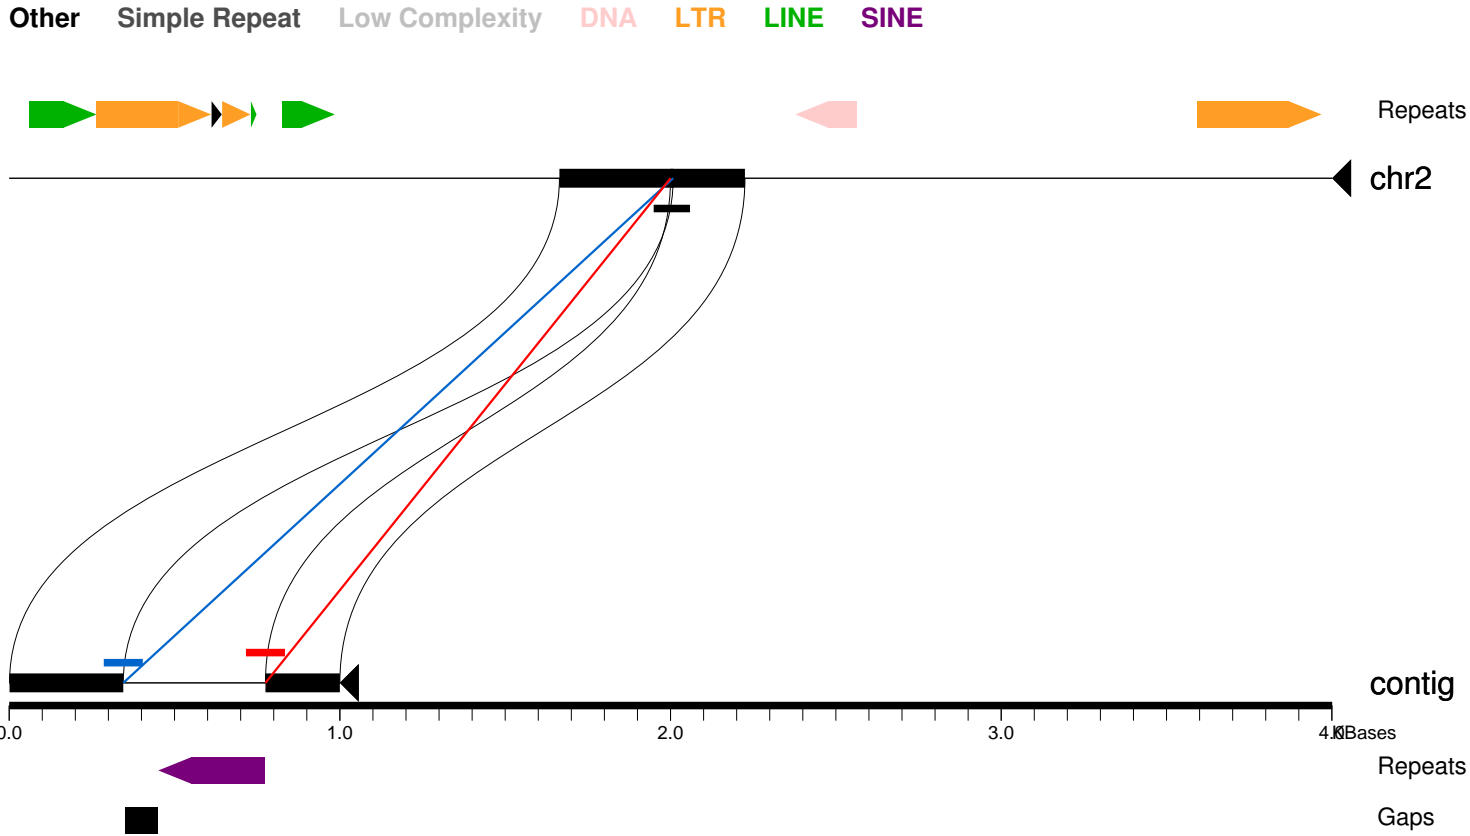

siteID: chr2\_212708353 Scafftig4 - Breakpoint: chr2:212708333

chr2:212708297-212708392

Overlap Length: 24 INS size: 291 Genotyped: Yes

```
left      -----CTAAACAAGTGATTGGATGGCAG-----CAAAGCAGATTTTAAAAATGTTTT
chrom     -----CTAAACAAGTGATTGGATGGCAG-----CAAAGGAGATTTTAAAAATGTTTT
right     GATTGTGCCACTGCACTCCAGCCTGGGCGACAGAGCGAGACTCCGTCTCAAAAAAAAAAAAAAATAAAATGTTTT
          111111111111**11**1111*11***11*1***111111111111111*11*1N*1*1111*****
```

```
left      TCTAGACATCCTTGGCCGGGCGCGGTGGCTCACGCCGTGTAATCCCAGCACTTTGGGAGGCCGAGGCGGGC
chrom     TCTAGACATCCTTAA----GCTAGTT---TTATGT---TTATCTTAG---TTTCGTT--CTGTG-----
right     TCTAGACATCCTTAA----GCTAGTT---TTATGT---TTATCTTAG---TTTCGTT--CTGTG-----
          *****222222**22*2*222*2*2*2222*2***22**222***2*2222*2*2*222222
```

```
left      GG
chrom     --
right     --
          22
```

Other   Simple Repeat   Low Complexity   DNA   LTR   LINE   SINE

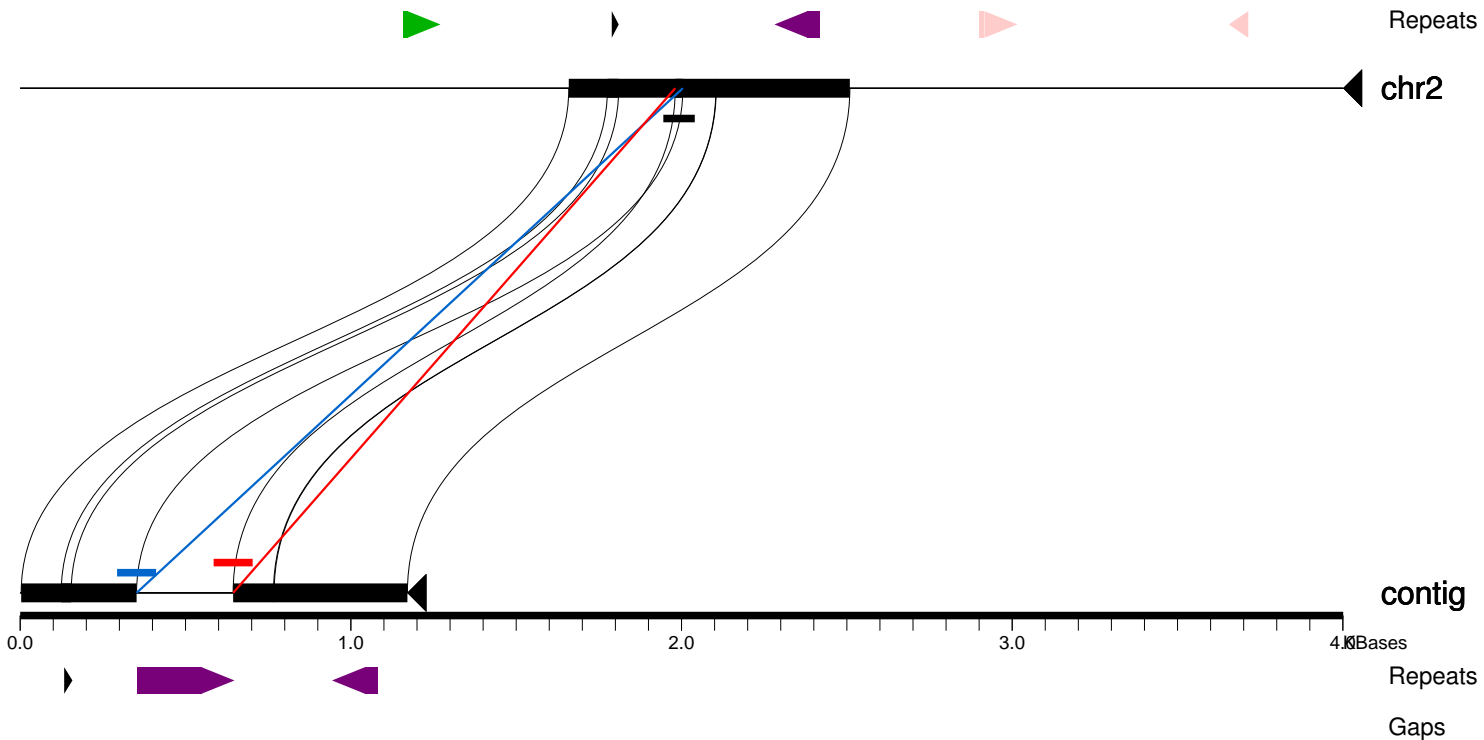

siteID: chr2\_212925330 Scafftig1 - Breakpoint: chr2:212925313

chr2:212925153-212925484

Overlap Length: 12 INS size: 327 Genotyped: Yes

```
left  A-----CCCAGCCATCCCATTACTGGTTATATACCCAAAGGATTATAAATCATGCTGCTATAAA
chrom AATACCATTTGACCCAGCCATCCCATTACTGGTTATATACCCAAAGGATTATAAATCATGCTGCTATAAA
right AGAATGGCGTGAACCCGGGAGGC-----GGAGCT-TGC---AGTGAGCCGAGATCCCGCCACTG-----
      *NN2NNNNN2221**1*11*11*1111111**111*1*1*111*11**1111*1***11**11**11111

left  GACACATGCACACGTATGTTTATTGCGGCACTAT-TCACAATAGCAAAGACTTGGAAACCCACCCCAACGT
chrom GACACATGCACACGTATGTTTATTGCGGCACTAT-TCACAATAGCAAAGACTTGGAAACCCACCCCAACGT
right --CAC-TCCAGCCTGGGCGACAGAGCGAGACTCCGTCTCAAAAAAAAAAAAAAAAAAAAAAAAAAAAA---
      11***1*1**11*111111111*11***11***111*1***1*11***1*11111**111*1111**111

left  CCATCAATGATAGACTGGATTAAGAGTATGTGGCGCGG--CGCGGTGGCTCAC-----GCCTGTAA--
chrom CCATCAATGATAGACTGGATTAAAGAGTATGTGGCACATATACACCATGCAATACTATGCAGCCATAAAAA
right --AAAAAAAAAAAAAAAAAAAAAAAGAGTATGTGGCACATATACACCATGCAATACTATGCAGCCATAAAAA
      11*11**11*1*1*11111*11*****22*22222*2*22**2222**222222**222*22

left  -----TCCAGCACTTTGGGAGGCCGAGCGGGCGGATCACGAGGTCAGGAGATCGAG---ACCATC
chrom AGAATGAGTTCGTGTCCTTTGT-AGG--GACATGGATGAATCTGGAAAACCATCATTTCTCAGCAAATTATC
right AGAATGAGTTCGTGTCCTTTGT-AGG--GACATGGATGAATCTGGAAAACCATCATTTCTCAGCAAATTATC
      22222222*2*22*22*****22***22**222**22*2***22**222**22*22222**222*22***

left  CC--GGCTAAAAATGGTGAA-ACCC--GTCTC--TACTA-----AA
chrom TCAAGGATAAAAAACCAAACACCACATGGTCTCACTCATAGATGGGGAATTGAACAA
right TCAAGGATAAAAAACCAAACACCACAT-----
      2*22**2*****22222*2***2*22 11111 1NN11 11
```

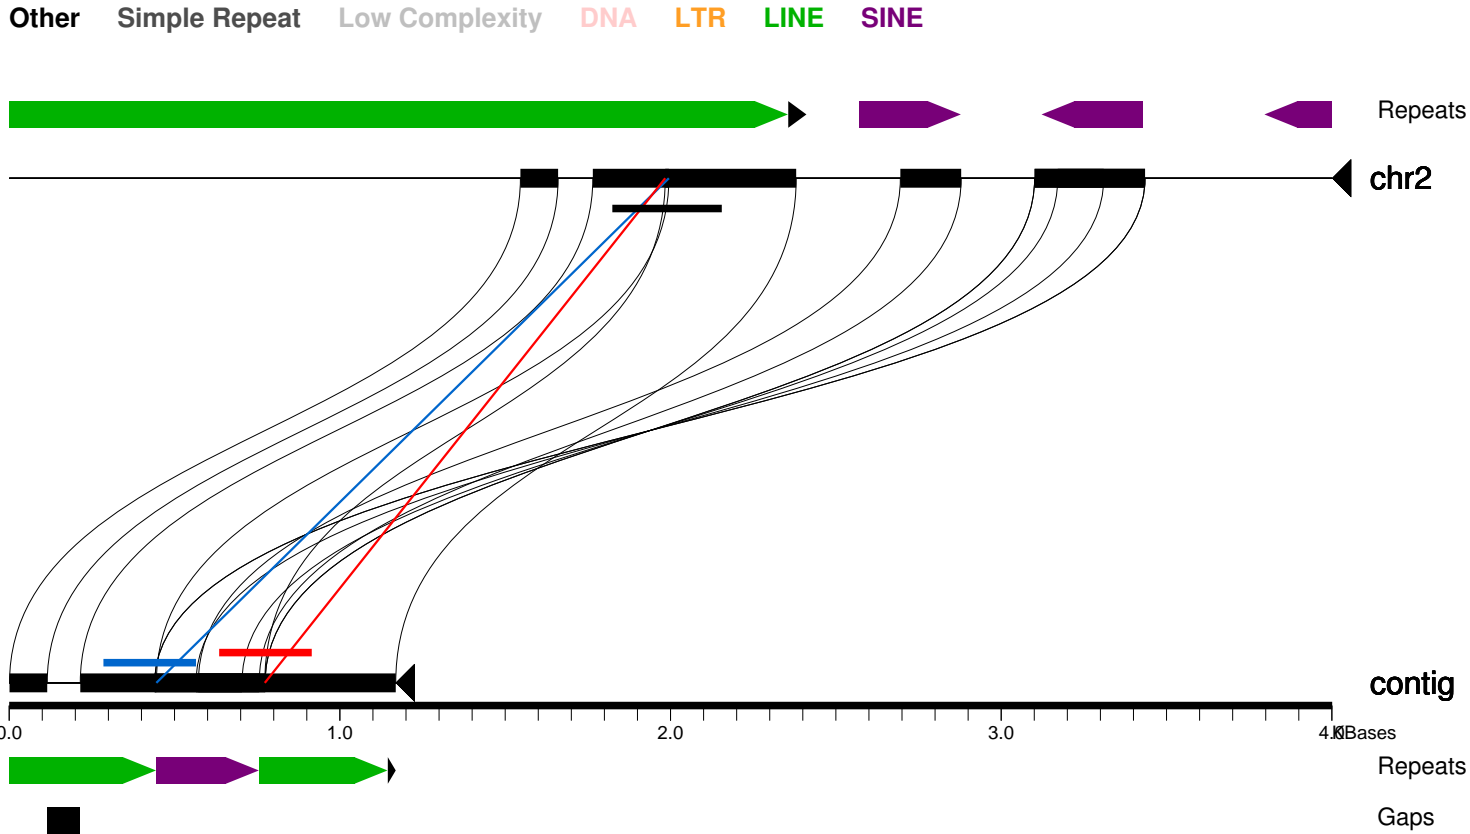



siteID: chr2\_213029685 Scafftig1 + Breakpoint: chr2:213029687  
chr2:213029642-213029746  
Overlap Length: 15 INS size: 364 Genotyped: No

```
left  --GAACTACTTGTCCTTA-----TGG----ACAAACTCGACTTTGAAGAAATTTTTCCTTTTCGCAT
chrom --GAACTACTTGCCCTTA-----TGG----ACAAACTTGACTTTGAAGAAATTTTTCTTTTCGCAT
right CCGCCCGCCTCGGCCTCCCAAAGTGCTGGGATTACAGGCGTGAGCCACCGCGCCCGGCCCTTTTCGCAT
      11*11*11**1*N***1111111111***1111***11*12**11111111111111111111*****

left  TTTTNNNNNNNNNNNNNNNNNNNNNNNNNNNNNNNNNNNNNNNNNNNNNNNNNNNNNNNNNNNNNNNNNN
chrom TTTTAATT-----GTCAAGTAACTTCAAAGAAAACATGAAGAAAATAAAAGACC
right TTTTAATT-----GTCAAGTAACTTCAAAGAAAACATGAAGAAAATAAAAGACC
      ***22**22222222222222222222222222222222222222222222222222222222222222
```

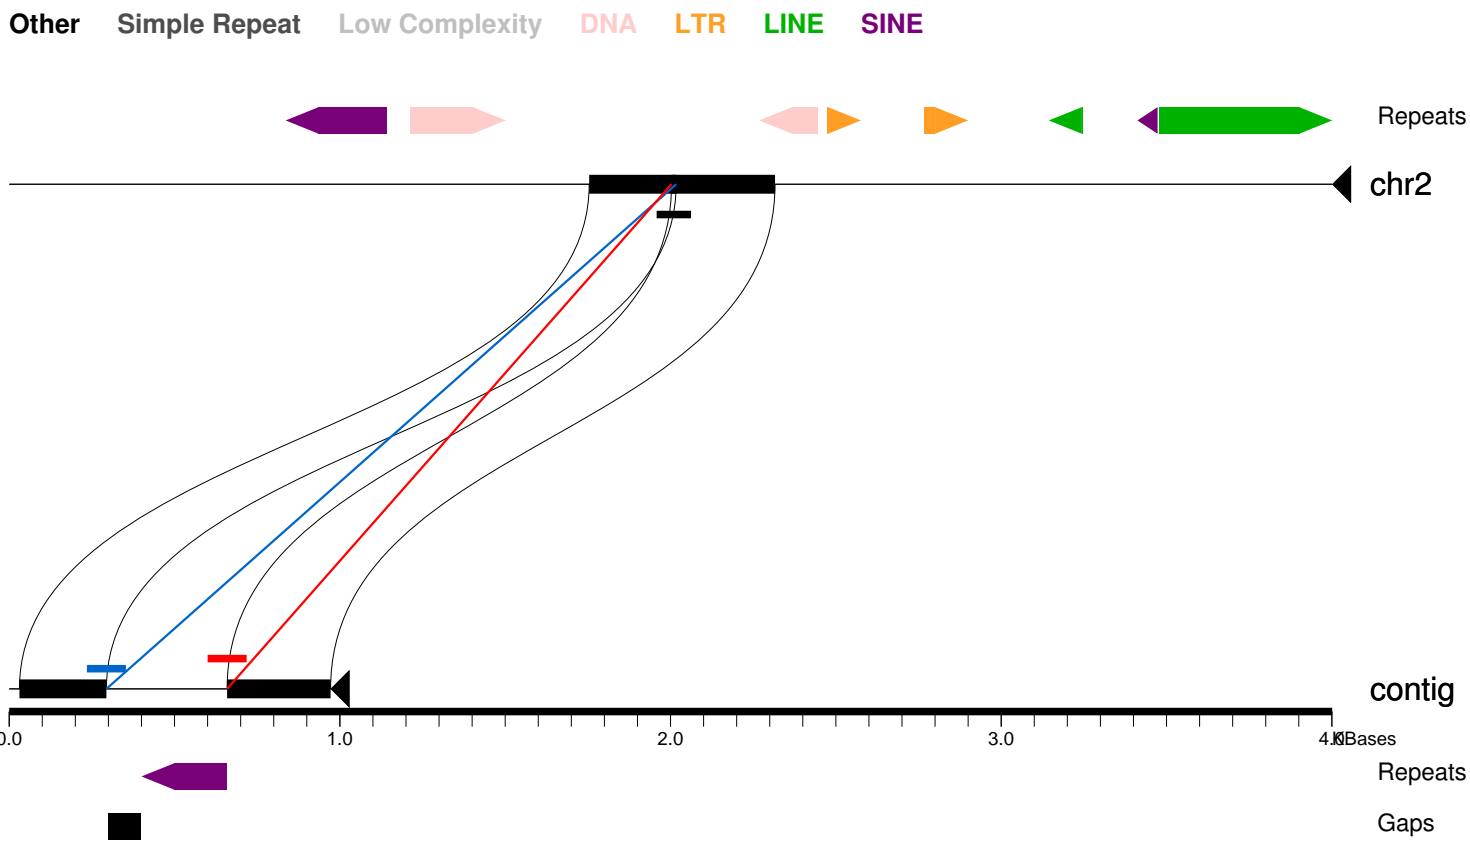

siteID: chr2\_213168126 Scafflig2 + Breakpoint: chr2:213168117

chr2:213167957-213168293

Overlap Length: 17 INS size: 316 Genotyped: Yes

```
left -----GATTAGGGAGCTTCAGACAGGAGGGATGTTTCAGGATTTCTCCCTATTTCACTTT
chrom CCTTCAGTGCCTTAATGGATTAGGGAGCTTCAGACAGGAGGGATGTTTCAGGATTTCTCCCTATTTCACTTT
right --TTTAGTAGAGACGGGGTTTCACCGTGTTAGCCAGGATGG----TCTCGAT--CTCCTGACCTCG--TG
      22N222NNNN2NN2*1**11111*11*1**1*****1**1111*11**11**11**11**11*1
```

```
left ATTGACAAAACACTCCAATTATGTATATTTGATTATAACCCCTCTGCTAGATCATGTCAGTATAGGAATGGA
chrom ATTGACAAAACACTCCAATTATGTATATTTGATTATAACCCCTCTGCTAGATCATGTCAGTATAGGAATGGA
right ATCCGC-----CCGCCTCGG-----CCTCCCAAAGTGC-TGGGATTACAGGCGTGAG
      **111*111111111**111*11*1111111111111111***1111*11*1**11*1**1**11*11
```

```
left TCTTTATCCACAGCTATAAAGACATTTATTACTTTCTT-----TTTTTTT-----TT
chrom TCTTTATCCACAGCTATAAAGACATTTATTACTTTCTTAAACAGACTTAAGTTCACAAATTTGGGAGGAACTT
right CCACCGCGCCCGGCC----GACATTTATTACTTTCTTAAACAGACTTAAGTTCACAAATTTGGGAGGAACTT
      1*1111111*1*1**1111111******1*2222222*222*2222222222222222**
```

```
left TGTTTTTTTTT---TTTGTTTTTTTTT---TTTGTAGA-CGGAGTCTCGCTGTC--GCCAGGCTGGAG--T
chrom TGTTC TACTGATATTTGATCCTTGTAAATCCTGAGAACAGACTCTATTTATCTAGCACGTGTTTAATACT
right TGTTC TACTGATATTTGATCCTTGTAAATCCTGAGAACAGACTCTATTTATCTAGCACGTGTTTAATACT
      ****2*22*2222****2*22*2*222*22*****2*2**2***222*2**22*2*22*22*222*
```

```
left GCAGTGGCGC---AATCTCGGCTCACTGCAGGCTCCGCCCTTGGGGTTCACGC-----
chrom GCTTAAGCCCTGAAAAGTTGTAAAAAATTTGGAAGTA--GTCTTATGGAAGTCTTCTGAAAT
right GCTTAAGCCCTGAAAAGTTGTAAAAAATTTGGAAGTA--GTCTTATGGAAGTCTTCTGAAAT
      **2222*2*222*22*222222*2**2*2*2222*2*222111NNN11NNN1
```

Other Simple Repeat Low Complexity DNA LTR LINE SINE

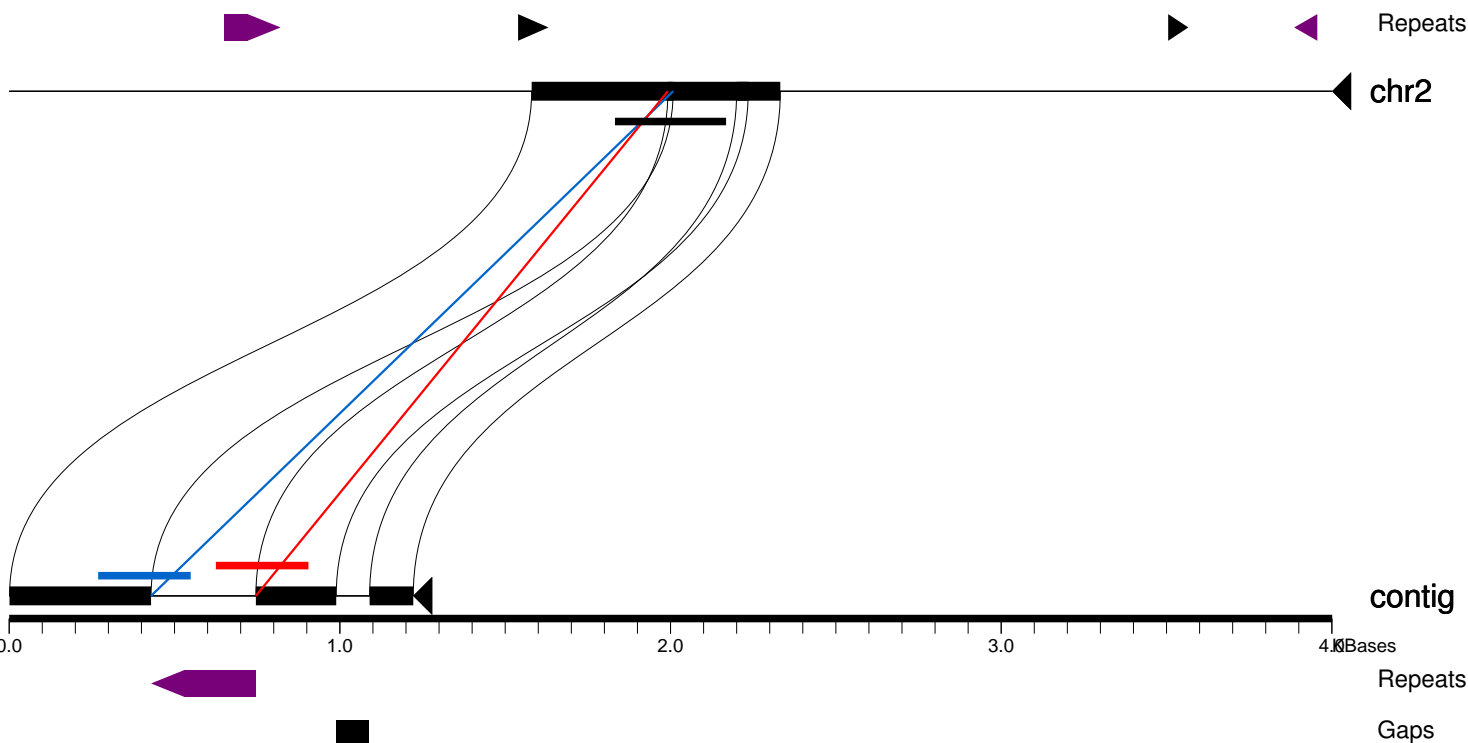

siteID: chr2\_21381163 Scaffoldig3 - Breakpoint: chr2:21381166  
 chr2:21381121-21381225  
 Overlap Length: 15 INS size: 304 Genotyped: Yes

```

left  AAAGGGTGAATTTTAT----GGCAGGTGAATGACAGT-----AAAGGGTATTATAAAAATTACA
chrom AAAGGGTGAATTTTAT----GGCAGGTGAATGACAGT-----AAAGGGTATTATAAAAATTACA
right CA-GTCCGCAGTCCGGCCTGGGCAACAGAGCGAGACTCCGTCTCAAAAAAAAAAAAAAAAAAAAAAATTACA
      1*1*111*1*1*1111111111***111*11*1*1*111111111111***111111*11*****
left  TGTATGGCCGGGCGCGGTGGCTCACGCCTGTAATCCCAGCACTTTGGGAGGCCGAGGCGGGTGG-
chrom TGTAT-----TATACTATGAATTCA--CCTAAGACTAAAAG-ATGAAAAGAAGAATGTA
right TGTAT-----TATACTATGAATTCA--CCTAAGACTAAAAG-ATGAAAAGAAGAATGTA
      ***222222222222*22222*2*22*22*22**2*22***222*2*2*222**22*22**22
  
```

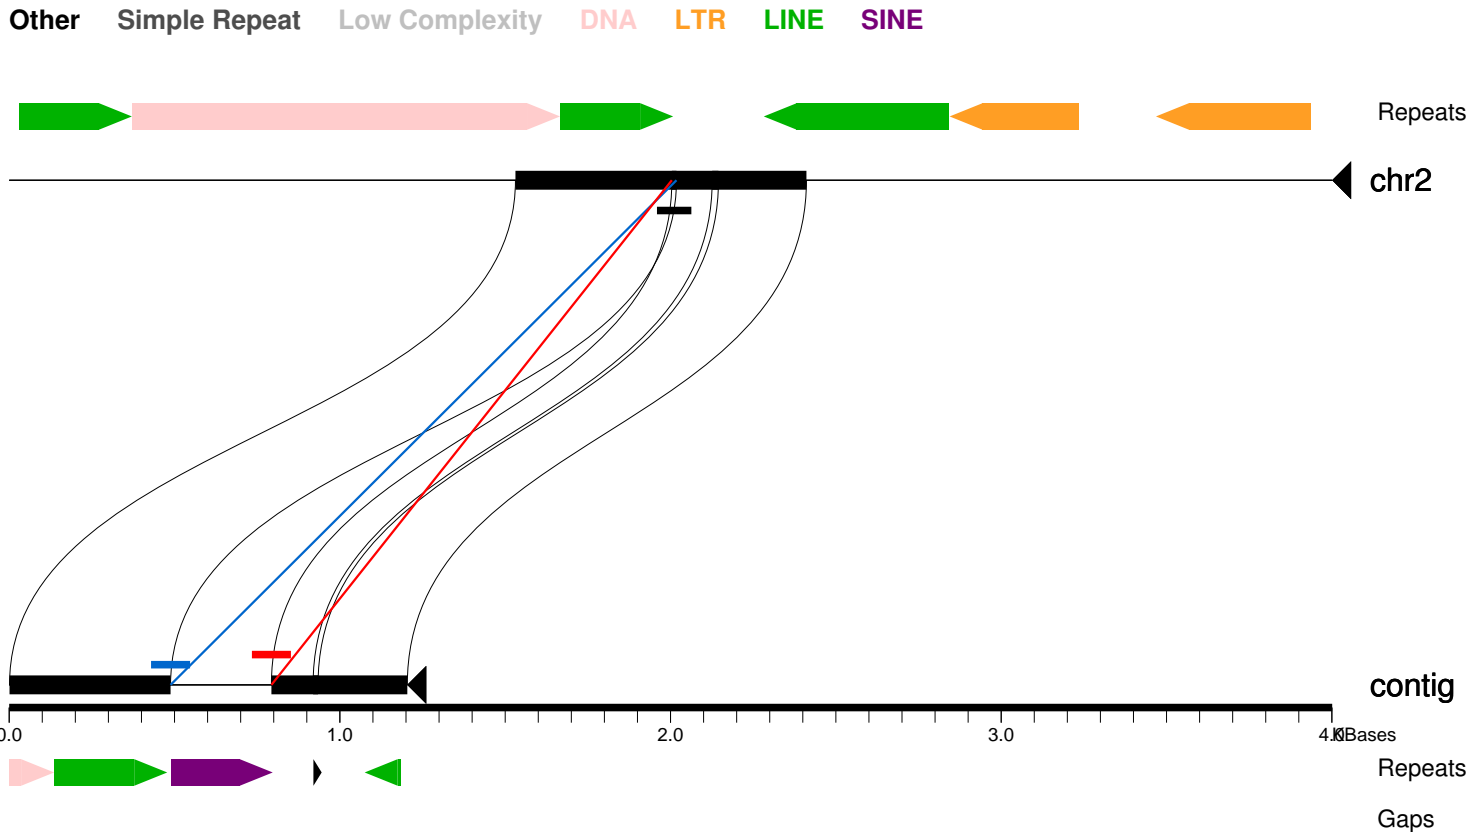







siteID: chr2\_21796830 Scaffitg13 - Breakpoint: chr2:21796814

chr2:21796768-21796870

Overlap Length: 14 INS size: 283 Genotyped: Yes

```
left      -----GCAGGAAAGTCAAGA-GGCAGA--GAAGCACTTACTCACTGTAGTTAAA--AGAATAGC
chrom     -----GCAGTAAAGTCAAGA-GGCAGA--GAAGCACTTACTCACTGTAGTTAAA--AGAATAGC
right    ATCGCGCCACAGCACTCCCAGCTGGGCGACAGAACGAGACTCCGTCTCAAAAAAAAAAAAAAAAAAGAATAGC
          111111111111***12111*1*11*11*1****11*11*1*111****1111*111***11*****
left      ATTCCTGGCCGGGCGCGGTGGCTCACGCCTGTAATCCCAGCACTTTGGGAGGCCGAGGCGGGCGG
chrom     ATTCCT-----TTCCTTAGTCCTTTCTTTCTGTC---TTTGCTTGCTGAAATATCCT-
right    ATTCCT-----TTCCTTAGTCCTTTCTTTCTGTC---TTTGCTTGCTGAAATATCCT-
          *****222222222222*22**2*22***2*22*2*222*222**2*222**2**222222*22
```

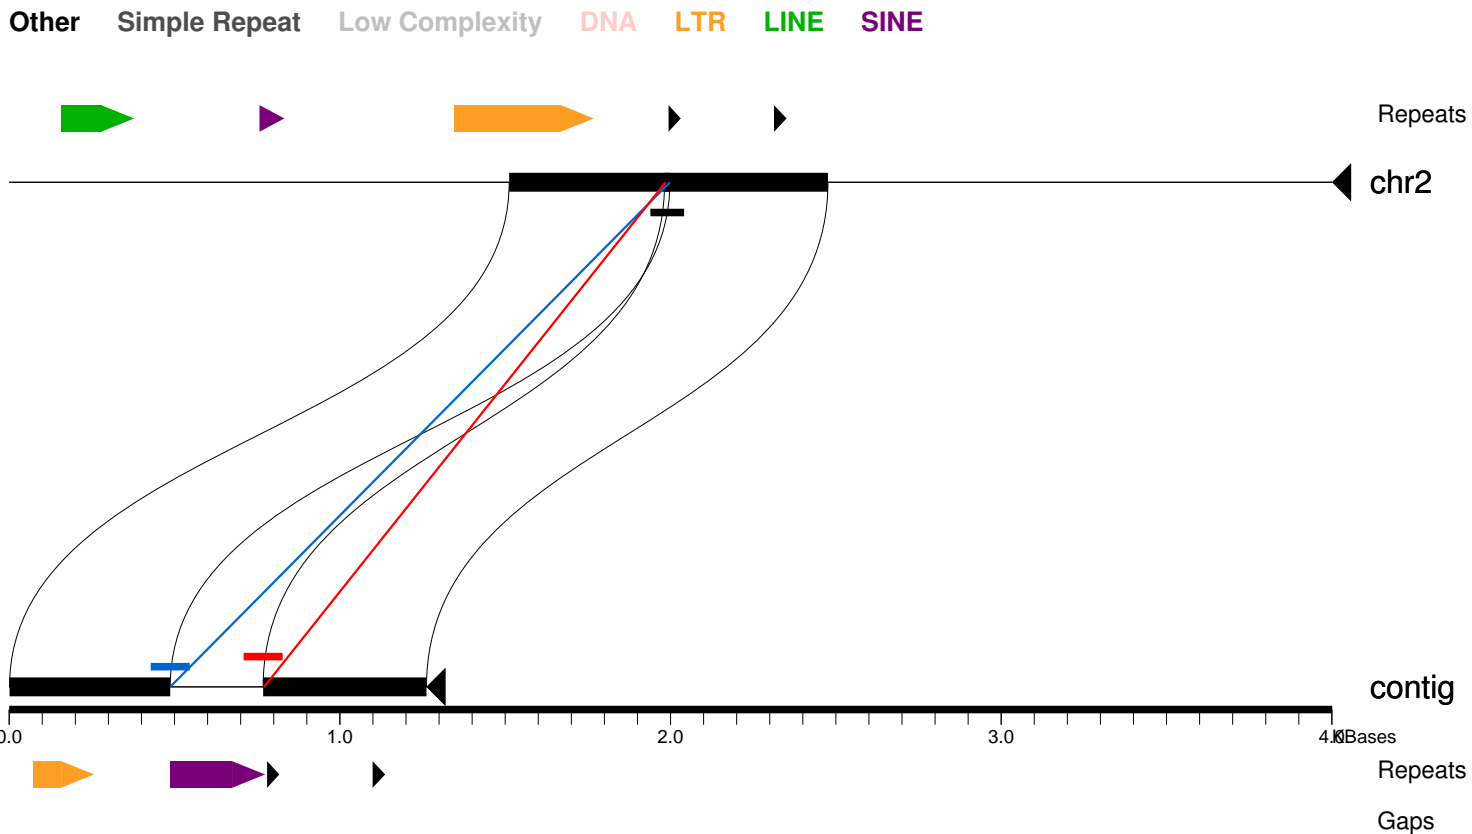

siteID: chr2\_218180779 Scaffitg11 + Breakpoint: chr2:218180758

chr2:218180598-218180932

Overlap Length: 15 INS size: 295 Genotyped: Yes

```
left  -----CAATCCTTTCATGTGACCTGATTCTTCCTGGGCACAGGACAAGAAAAGAATTCAA
chrom GCATACACCACCTTCAATCCTTTCATGTGACCTGATTCTTCCTGGGCACAGGACAAGAAAAGAATTCAA
right  -----CGTGAACCC-----GGGAAGCGGAGCTTGCAGTGAGCCG-----AGATTGCGC
        2N21**1**111111*1**111*111***1*1*11*1*111111111***1*1*11

left  GATGCACTGGGTGCAGGAACCCAGAAAAGGCTGTCACACTGACTCTTCAGTGAGTTGTTTAACTGAAGC
chrom GATGCACTGGGTGCAGGAACCCAGAAAAGGCTGTCACACTGACTCTTCAGTGAGTTGTTTAACTGAAGC
right  ----CACTGCAGTCCGCGAGTCCGACCTGGGCGACAGAGCGAGACTCC-----GTCTCAAAAAAAAA--
        1111*****1111*1*1*11**111111**11*1**1*11**11**1*111111111**1*1*1*111**11

left  CATCCAGGAATGGCAAAGCTAAAAAGAAAGAGCCTT-----TCACGCCTGTAATC-----CCAGCACTT
chrom CATCCAGGAATGGCAAAGCTAAAAAGAAAGAGCCTTGTGTTTGTAAACATATGCTTTCTGGGGCTCCAGAGGTC
right  ----AAAAAAAAAAAAAAAAAAAAAAGAAAGAAAGAGCCTTGTGTTTGTAAACATATGCTTTCTGGGGCTCCAGAGGTC
        111111*11**1111***1111*****22222*2**222*222*222222222***222*2

left  T--GGGAGGCCGAGGCGGTTGGATCATGA-GGTCAGGAGATCG---AGACCATCCTGGCTAA-----
chrom TCAGGCAAACCCCTAGATGCTGCCACAGGCTGGTACGGGGTTTGTGTTTATGCCAAA-TGCCCAAAGGTACTC
right  TCAGGCAAACCCCTAGATGCTGCCACAGGCTGGTACGGGGTTTGTGTTTATGCCAAA-TGCCCAAAGGTACTC
        *22**2*22**222*22*2**222**2*22***22**2*2*222*22***222**2*2**22222222

left  ---CAAGGTGAA--ACCC-----CGTCTCTACTAAAAAATACAAAAAA---TTAGC-
chrom ACCCCAGCTGCTGCACCCACTCACGTGTGTACTCCTGCTCCCACAAGGGGTTGGAG
right  ACCCCAGCTGCTGCACCCACTCACGTGTGTACTCCTGCTCCCACAAGG-----
        222*2**2**2222***22222***2*2***22222*2*2*2**22  11N1N
```

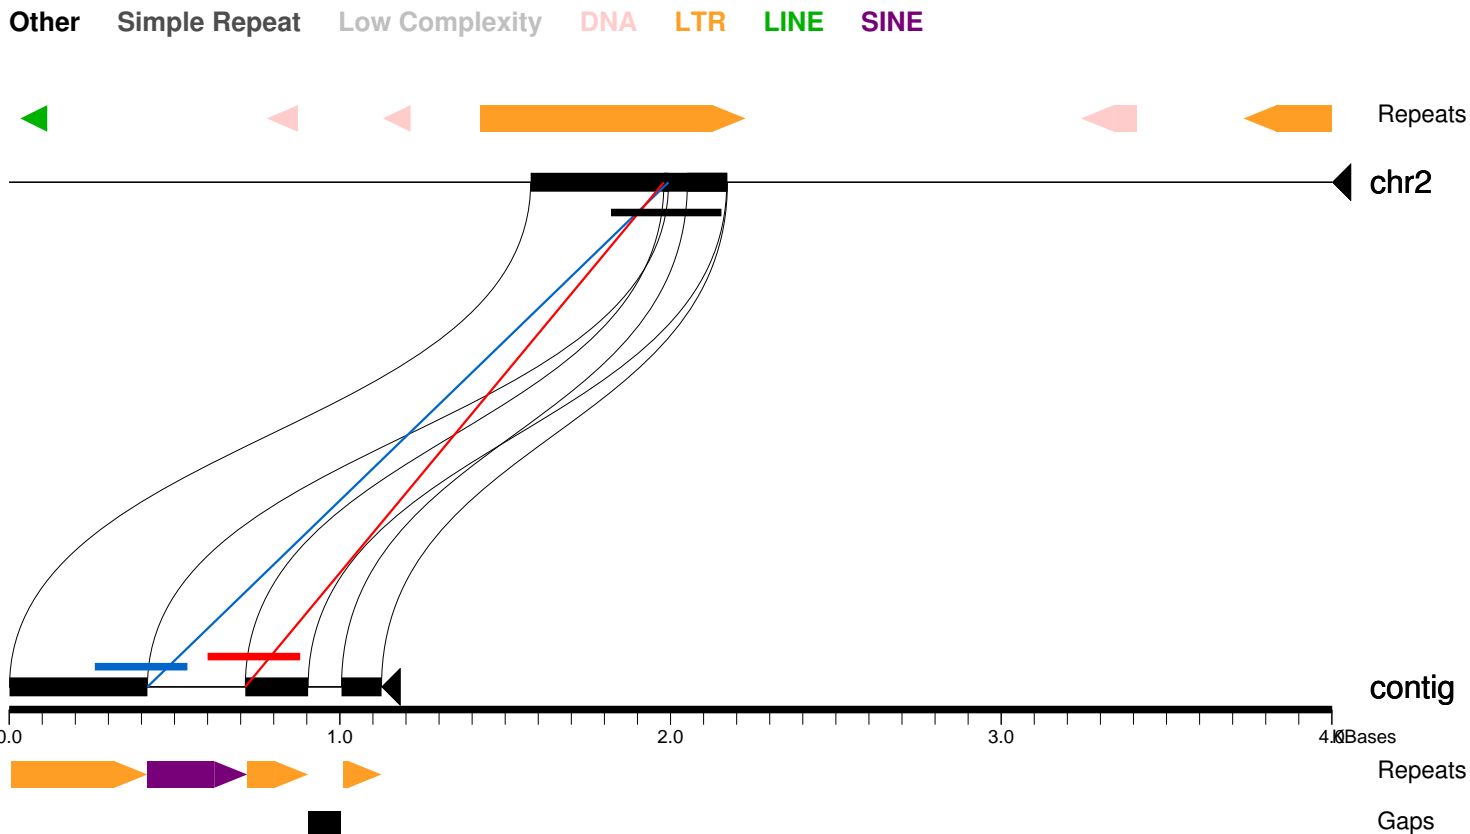



siteID: chr2\_218265096 Scaffitig6 - Breakpoint: chr2:218265081

chr2:218265032-218265140

Overlap Length: 11 INS size: 296 Genotyped: Yes

```
left  CCATC-CAGCA-----AGATCTTGCTTTGCAAATGA---AGTTGCCTTCTTACTGTTTAAGACTGGTGG
chrom CCATC-CAGCA-----AGATCTTGCTTTGCAAATGA---AGTTGCCTTCTTACTGTTTAAGACTGGTGG
right GCGCCACTGCAGTCCGCAGTCCAGCCTGGGCGACAGAGCGAGACTCCGTCTCAAAAAAAAAAAGACTGGTGG
      1*11*1*1***111111**11*111**11**1*11**111**111**1***1*111111*****
```

```
left  GGCCGGGCGCGGTGGCTCACGCCTGTAATCCACGACTTTGGGAGGCCGAGGCGGGTGG
chrom AA--GTCATTGGTTCCAGAACTAAGAAAAGGGAGGAAGTGTGTGGGGCCAAG-----
right AA--GTCATTGGTTCCAGAACTAAGAAAAGGGAGGAAGTGTGTGGGGCCAAG-----
      2222*22222***22*22*22222*2**22222*2*2*2**2*2***2**22222222
```

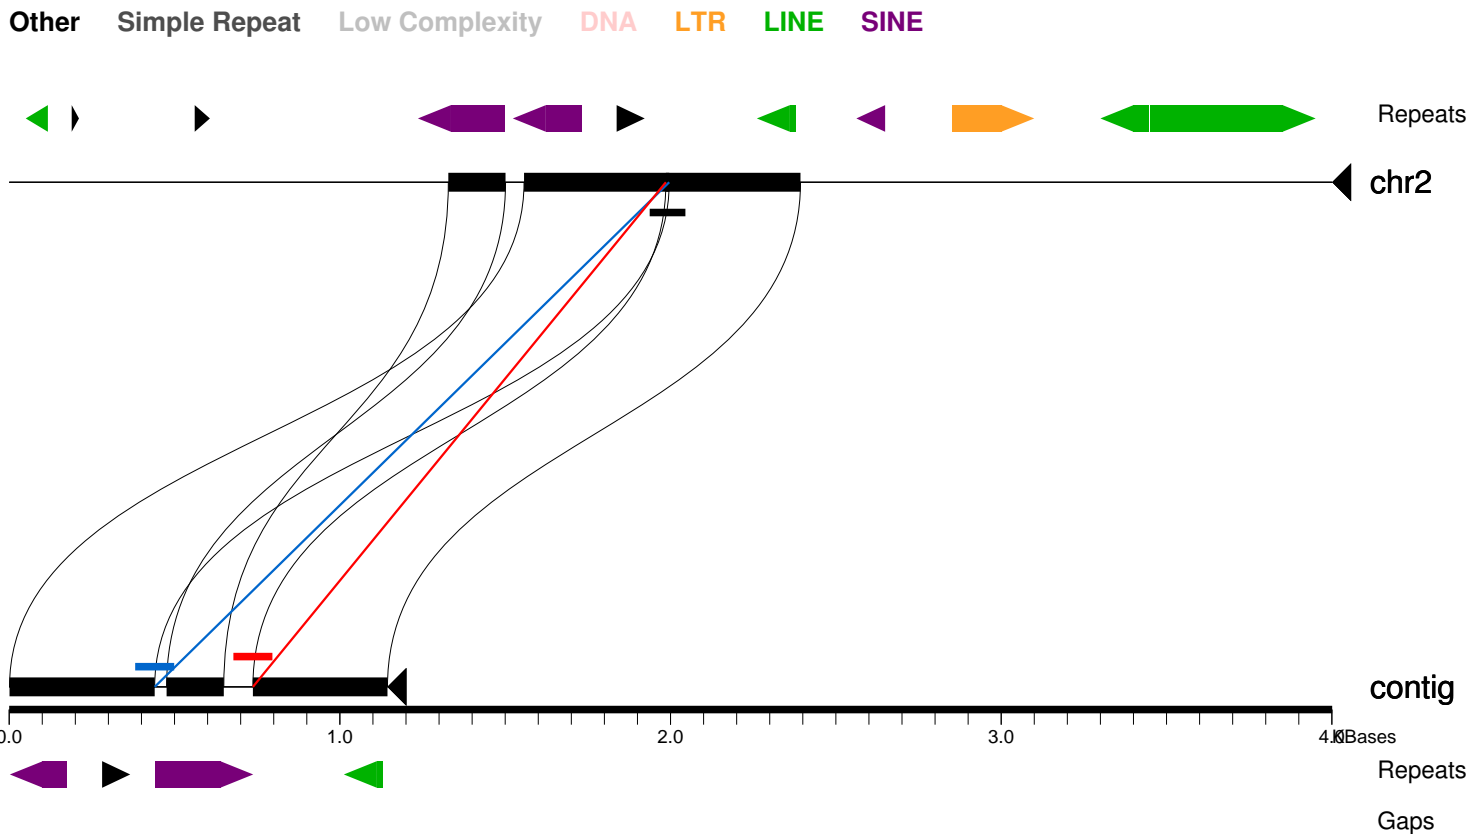

siteID: chr2\_219576596 Scaffitig1 - Breakpoint: chr2:219576594

chr2:219576538-219576653

Overlap Length: 4 INS size: 435 Genotyped: No

```
left      TCGGAAATATTTTAATCCTTCCTTGATGAAATCTTC-----TTTGCTTTCTCAGATACTACAAAATNNNNN
chrom     TCGGAAATATTTTAATCCTTCCTTGATGAAATCTTC-----TTTGCTTTCTCAGATACTACAAATCACCT
right    -CGCCCGCCTCGGCCTCCCAAAGTGCTGGGAT-TACAGGCGTGAGCCACCGCGCCCGCCTAAATCACCT
          1**111111*111111***111111**1**11**1*1*111111*11**111*1*1111111111***22222

left      NNNNNNNNNNNNNNNNNNNNNNNNNNNNNNNNNNNNNNNNNNNNNNNNNNNNNNNNNNNNNNNNNNNNNNNNNNNNNNN
chrom     ATTCTTTAACTGCAGCACCTGTTGATTTAGCATTTGGGGGACCCTTTGGGA---
right    ATTCTTTAACTGCAGCACCTGTTGATTTAGCATTTGGGGGACCCTTTGGGA---
          22222222222222222222222222222222222222222222222222222222222222222222222222222222222
```

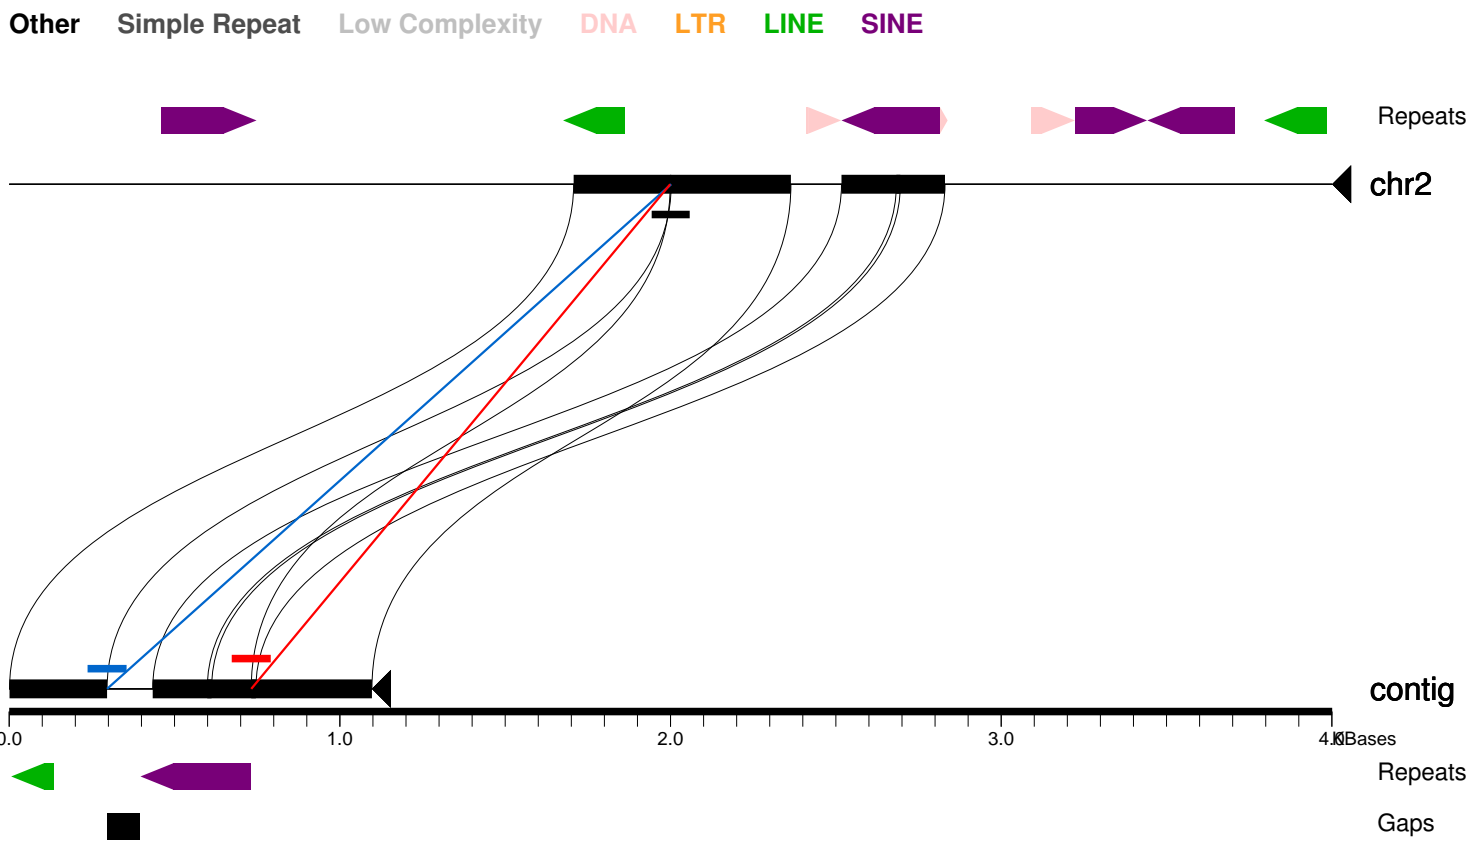

siteID: chr2\_223882888 Scaffitig3 - Breakpoint: chr2:223882869

chr2:223882825-223882928

Overlap Length: 16 INS size: 289 Genotyped: Yes

```
left  A--AATTCTACTTTAGTTG--GGGCATGACTTGGGC-----ATCAGGATGTGTAAGAGTTCCTC
chrom A--AATTCTACTTTAGTTG--GGGCATGACTTGGGC-----ATCAGGATGTGTAAGAGTTCCTC
right AGCACTCCCGCCTGGGCGACAGAACGAGACTCCGTCTCAAAAAAAAAAAAAAAAAAAAAAAAAAAAGAGTTCCTC
      *11*1*1*11*1*11*11111*11*11****11*1*11111111111*11*11*11111******
```

  

```
left  AGGTGGCCGGGCGCGGTGGCTCACGCCTGTAATCCCAGCACTTTGGGAGGCCGAGGCGGGCGGA
chrom AGGTGACTGAT-GCATAGGCTG--GGTTGAAAACCG----CTCTGGTGAGTTGAA-----A
right AGGTGACTGAT-GCATAGGCTG--GGTTGAAAACCG----CTCTGGTGAGTTGAA-----A
      ****2*2*222**222****222*22**2**2**22222**2***222*22**2222222*
```

Other Simple Repeat Low Complexity DNA LTR LINE SINE

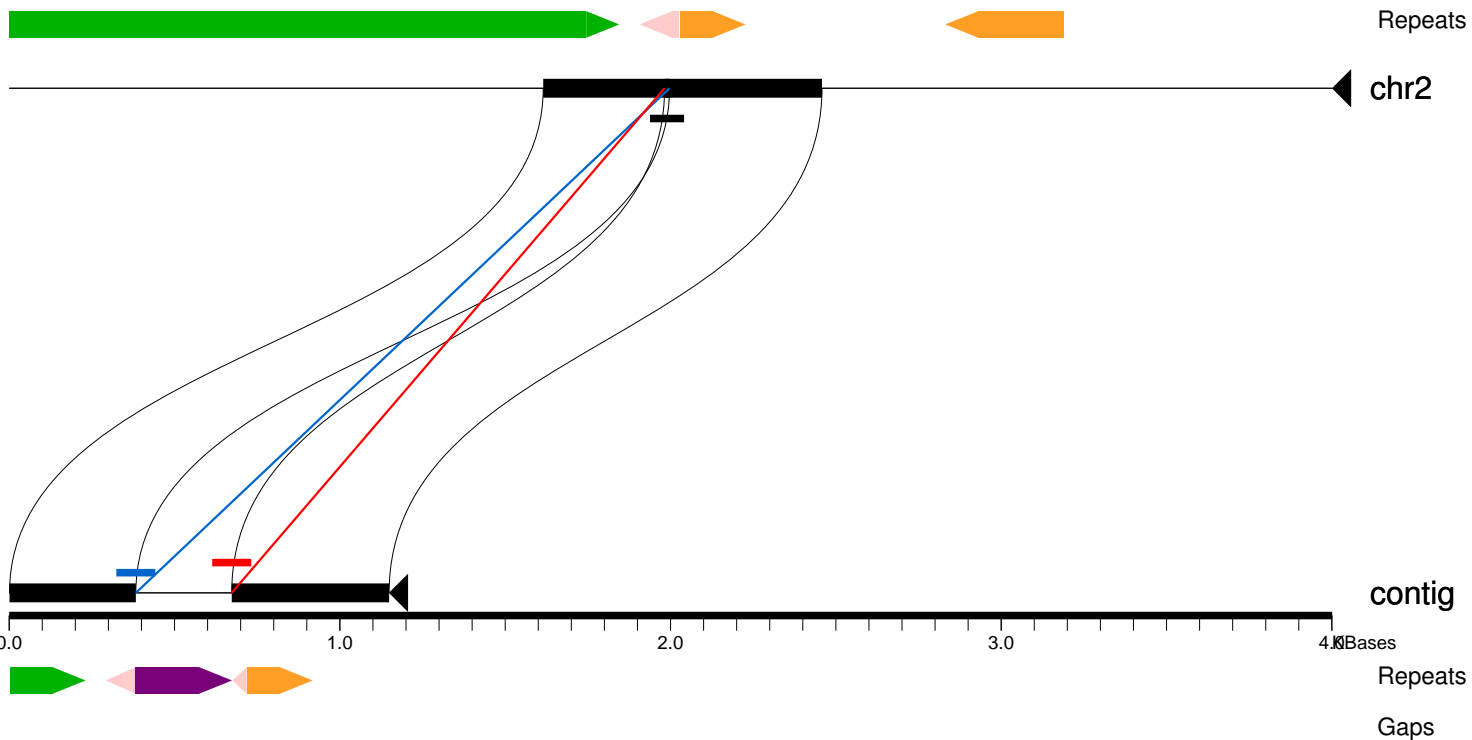

siteID: chr2\_225114113 Scafftig2 - Breakpoint: chr2:225114121

chr2:225114072-225114177

Overlap Length: 11 INS size: 307 Genotyped: Yes

```
left      TG-----GATCTTTTGGAAAGATCTTGTGT---TCCAAAGTTGTTTACTGTTCTAAGAACCAAGC
chrom     TG-----GATCTTTTGGAAAGATCTTGTGT---TCCAAAGTTGTTTACTGTTCTAAGAACCAAGC
right     AGTCCGCAGTCCGGCCTGGGCGACAGAGCGAGACTCCGTCTCAAAAAAAAAAAAAAAAAAAAAAAAAAACAAGC
          1*111111111111*11**11111**1***1*11*11*111**11**11111111*11111111**1*****
left      CAGGCCGGGCGCGGTGGCTCACGCCTGTAATCCACGACTTTGGGAGGCCGAGGCGGGTGA
chrom     CAGT----GTACTGTTGGACACCTCATTTGAC-----TAGTATTCAGATCCCCTACAT
right     CAGT----GTACTGTTGGACACCTCATTTGAC-----TAGTATTCAGATCCCCTACAT
          **22222*22*2**2*22***22*22*222*222222222*2*2*22*2**22*2222222
```

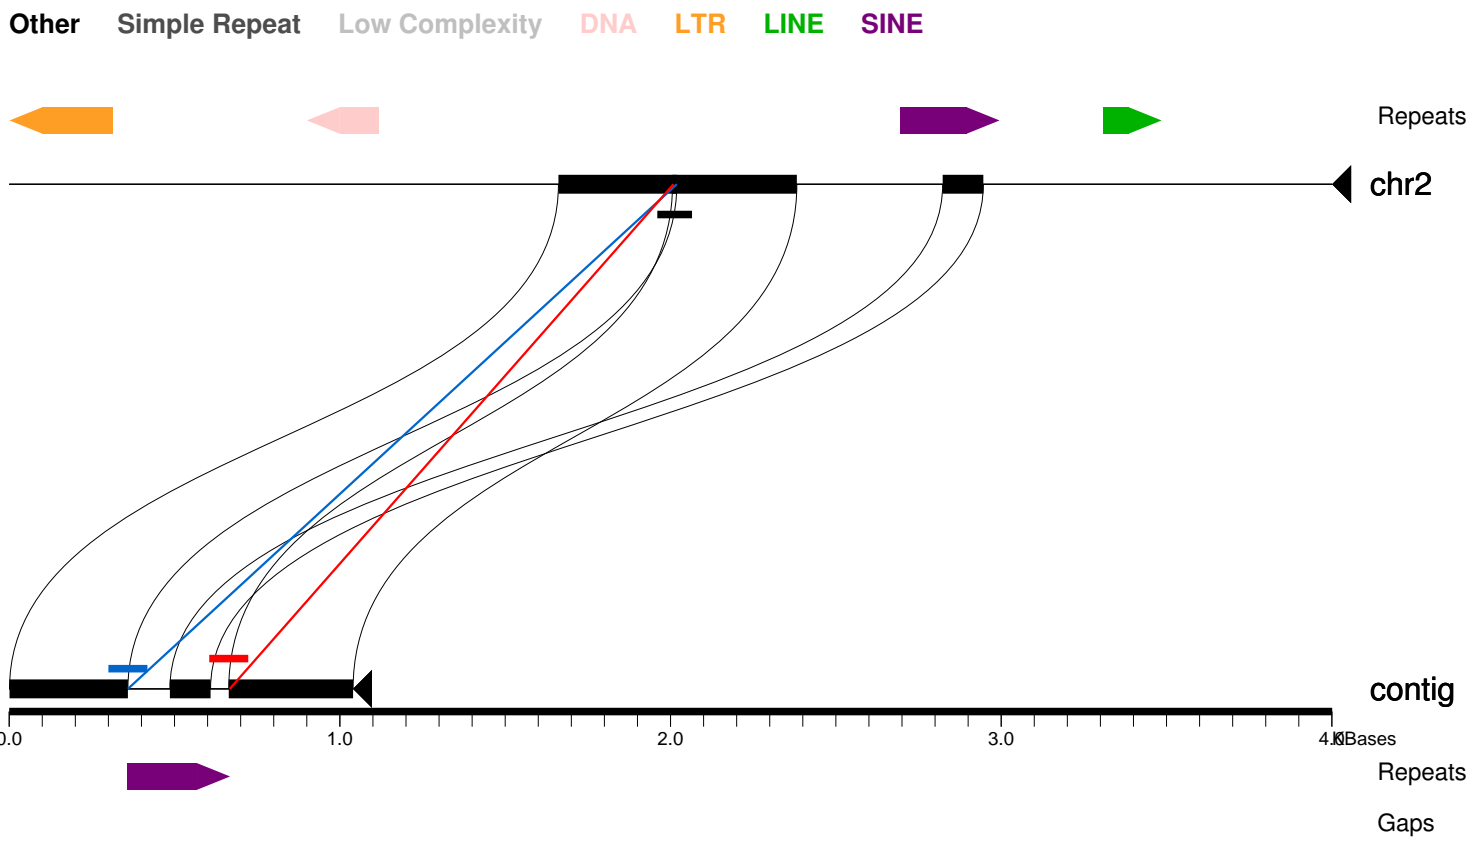

siteID: chr2\_225774534 Scaffitig8 - Breakpoint: chr2:225774510

chr2:225774465-225774569

Overlap Length: 15 INS size: 84 Genotyped: Yes

```
left  C-ACACAATGTATAAGCAACTGTGTACTCAACTAGAG-----CTTGATGTT-----AACATGCAG
chrom C-ACACAATGTATAAGCAACTGTGTACTCAACTAGAG-----CTTGATGTT-----AACATGCAG
right TGAGACAGAGTCTC-GCT-CTGTGCGCCAGGCTGGAGTGCAGTGGCGGGATCTCGGCTCACAACATGCAG
      11*1***11*1*11*11****111*1111*1***11111111*11***1*11111111*****
```

  

```
left  TGTTTTFTTTTTGTFTTTGTTTTTTGTTTTTTGAGACAGAGTCTCGCTCTGTCGCCAGGCTGGA
chrom TGTTTFTAATGGATGTGAAAT-----AAGCCTATGCTTT-TGTGTGGGAATGTTTAA
right TGTTTFTAATGGATGTGAAAT-----AAGCCTATGCTTT-TGTGTGGGAATGTTTAA
      *****22*222***2222*2222222222222*22*22*22**222*2***2*222*2*2*22*
```

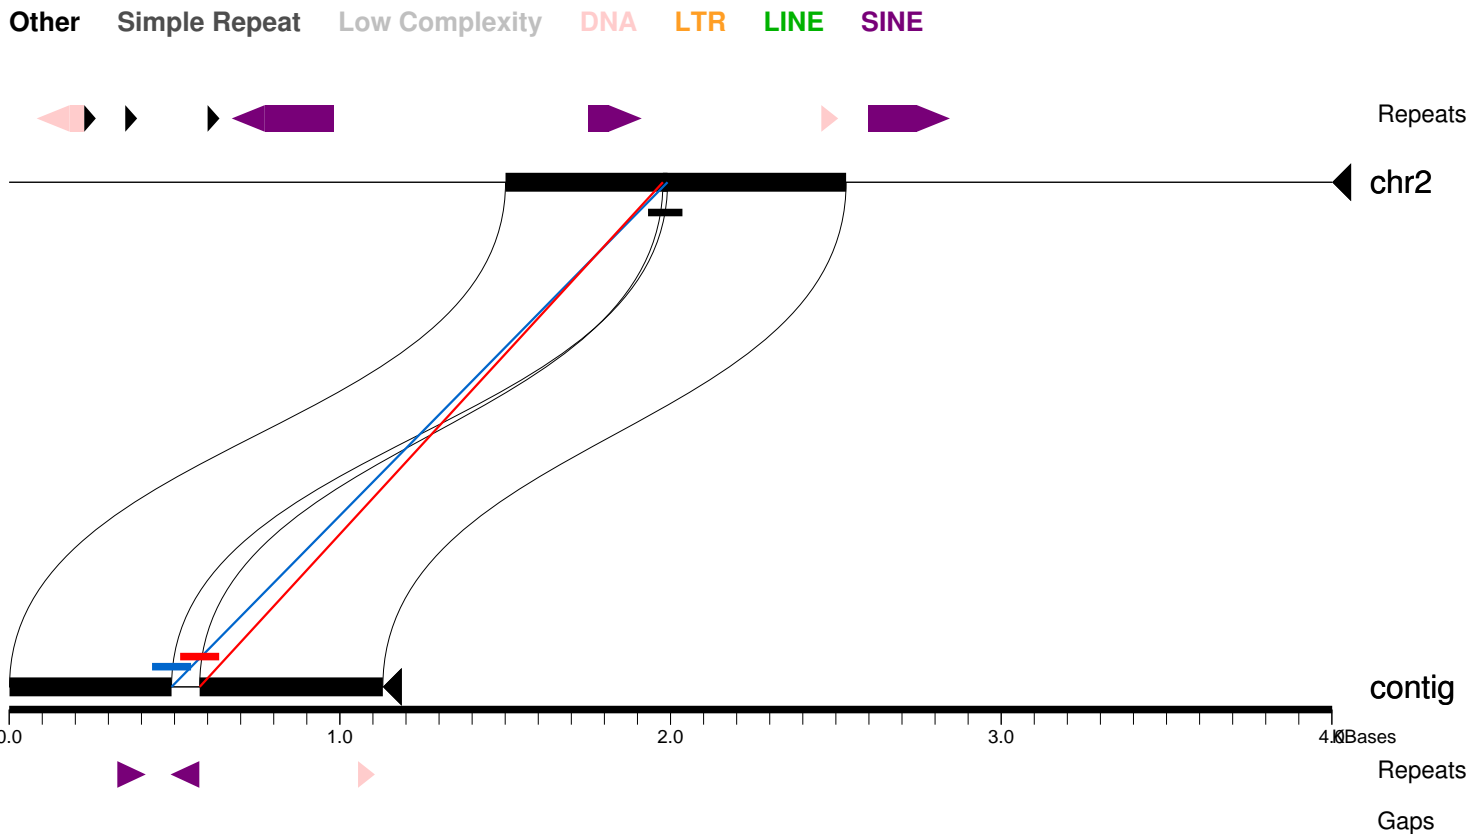

siteID: chr2\_226753693 Scaffitig1 + Breakpoint: chr2:226753677

chr2:226753631-226753736

Overlap Length: 14 INS size: 307 Genotyped: Yes

```
left  GCTTTC----CTTCATAGCAAT-TCCTGTAATTT--GTAATAATCCGTCCTGT-----TATTGCTGCTT
chrom GCTTTC----CTTCATAGCAAT-TCCTGTAATTT--GTAATAATCCATCCTGT-----TATTGTTGCTT
right CCACCCGCCTCGGCCTCCCAAAGTGCTGGGATTACAGGCGTGAGCCACCGCGCCCGGCC-TATTGCTGCTT
      1*111*1111*11*1*11***11*1***11***111*111*1*1**21*11*11111111*****N*****
```

```
left  TTTTFFFFFFFFTCTTTTTTTTTTGGAGACGGAGTCTCGCTCTGTCGCCAGGTCGGACTGCGGA
chrom TTTGAAGTCTCTCTCTCTTCATACTA--GATTATAAA-CT-----CCATGAGGG-CAG----
right TTTGAAGTCTCTCTCTCTTCATACTA--GATTATAAA-CT-----CCATGAGGG-CAG----
      **2222*2*2***2*2**22*222*22**2*2*2222**22222***2*22**2*2*2222
```

Other Simple Repeat Low Complexity DNA LTR LINE SINE

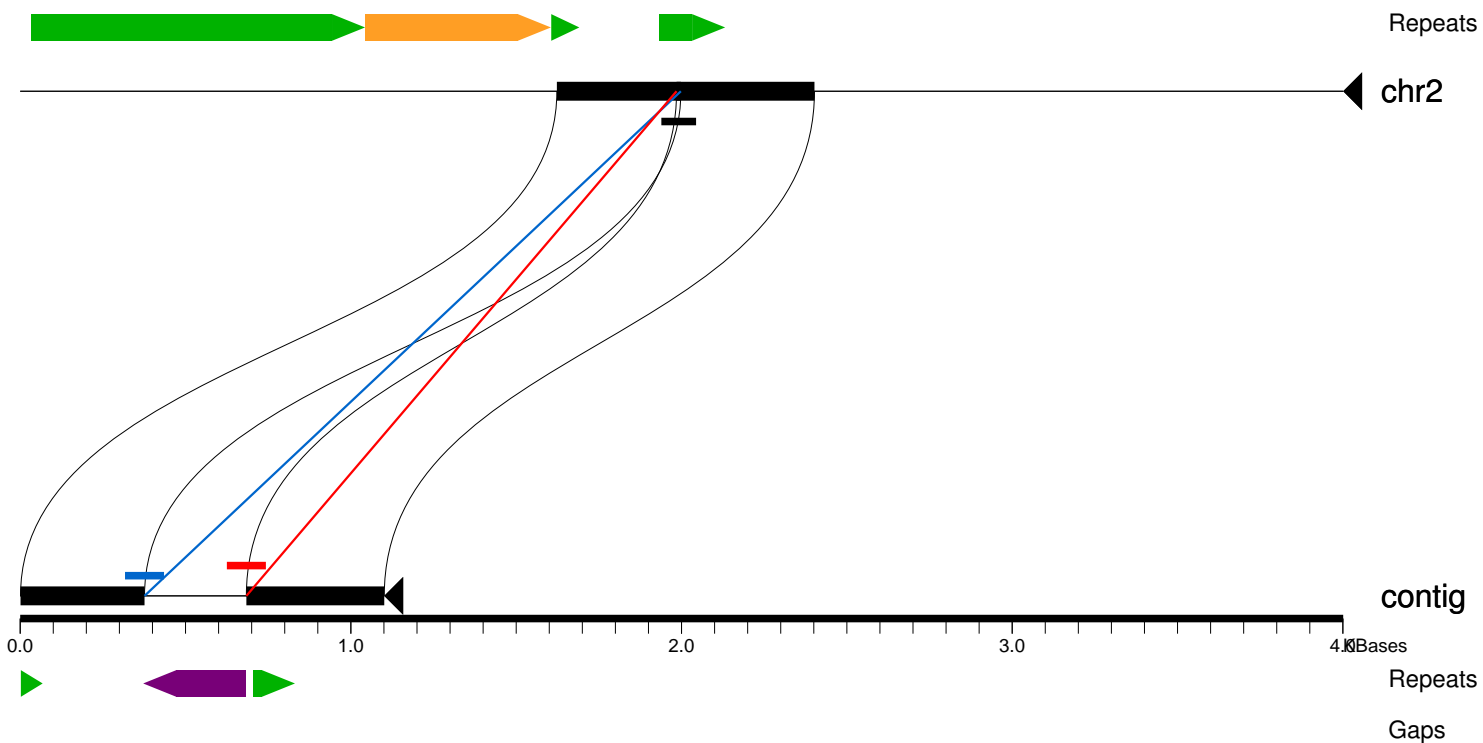



siteID: chr2\_229229723 Scaffitg1 - Breakpoint: chr2:229229733

chr2:229229684-229229792

Overlap Length: 11 INS size: 303 Genotyped: Yes

```

left  GAACTGGATCC----CATCAAATTTAAAACTTTGCTCTGTGAAAGACTCTGTT-----AAGAGGATGAA
chrom GAACTGGATCC----CATCAAATTTAAAACTTTGCTCTGTGAAAGACTCTGTT-----AAGAGGATGAA
right GCACTCCAGCCTGGGCGACAGAGCGAGACTCCGTCTCAAAAAAAAAAAAAAAAAAAAAAAAAAAGAGGATGAA
      *1***11*1**1111*11**1*111*1*111111***1111***1*1111111111111******

```

```

left  GGCCGGGCGCGGTGGCTCACGCCTGTAATCCCAGCACTTTGGGAGGCCGAGGCGGGCGG
chrom AA---GACAAGTT---ACAAACTTGAAG----AAAATATTTGCAAATGACATCCAACAA
right AA---GACAAGTT---ACAAACTTGAAG----AAAATATTTGCAAATGACATCCAACAA
      22222*2*22*2*2222**22*2**2*22222*22*22**2*2*22222222*222*22

```

Other   Simple Repeat   Low Complexity   DNA   LTR   LINE   SINE

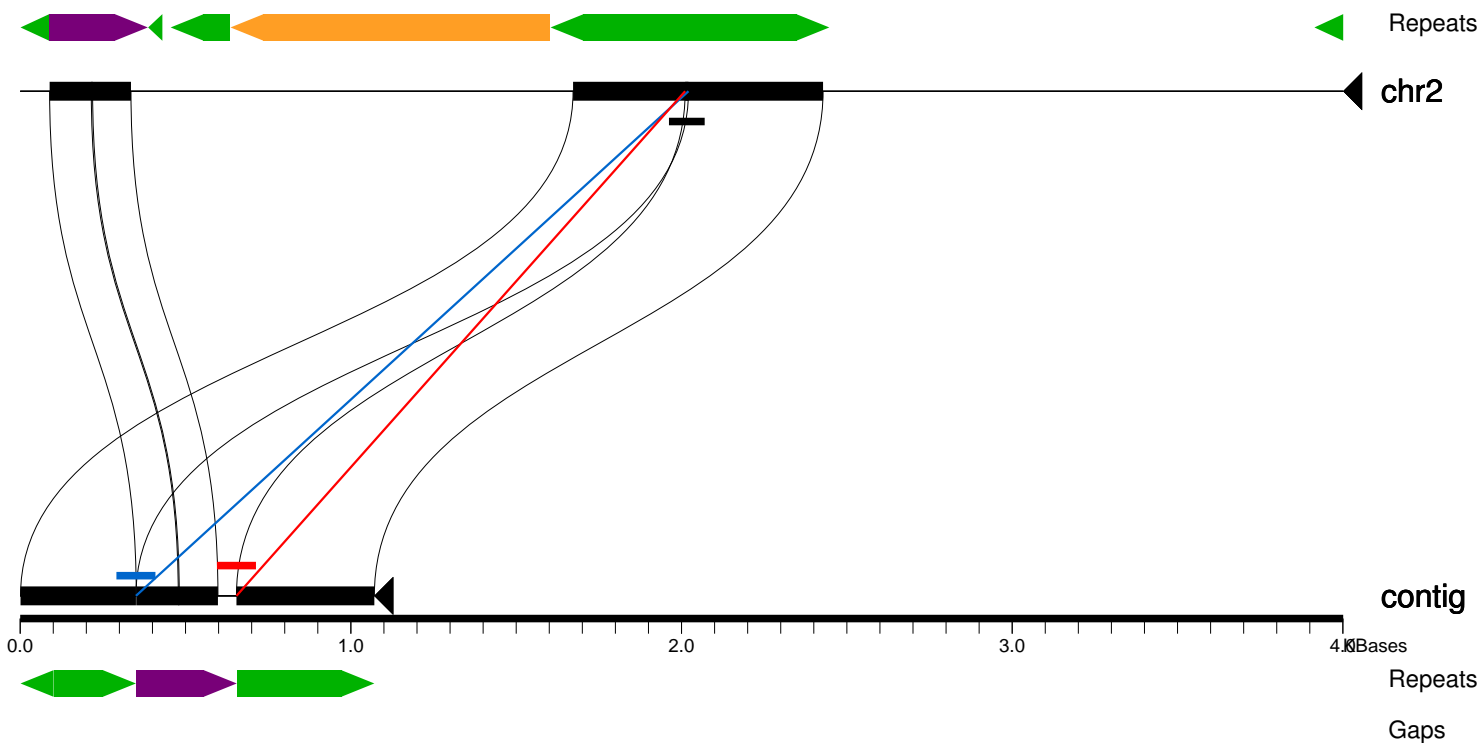



siteID: chr2\_238493800 Scaffoldig1 + Breakpoint: chr2:238493813  
 chr2:238493768-238493872  
 Overlap Length: 15 INS size: 433 Genotyped: No

```

left  TGTTTAGCTGGTTATAGAATCCATCCCACCTAACGCAGGCCTGCA-----AAAGGGTTCAT
chrom  TGTTTAGCTGGTTATAGAATCCATCCCACCTAACGCAGGCCTGCA-----AAAGGGTTCAT
right NNNNNNNNNNNNNNNNNNNNNNNNNNNNNNNNNNNNNNNNNNNNNNNNNNNNNNNNNNNNNNNNNNNNN
      11111111111111111111111111111111111111111111111111111111111111111111
      *****
left  GCTCGGCCGGGCGCGGTGGCTCACGCCTGTAATCCCAGCACTTTGGGAGGCCGAGGCGGGTGG
chrom  GCTCAACAG-----ATGCCTGTTAGATGAGTAAAT-GAATGAGTGAATTTGGAGA
right GCTCAACAG-----ATGCCTGTTAGATGAGTAAAT-GAATGAGTGAATTTGGAGA
      ***22*2*222222222222222*2*****2*2222*2*22*2*222*222*222*222*2*2
  
```

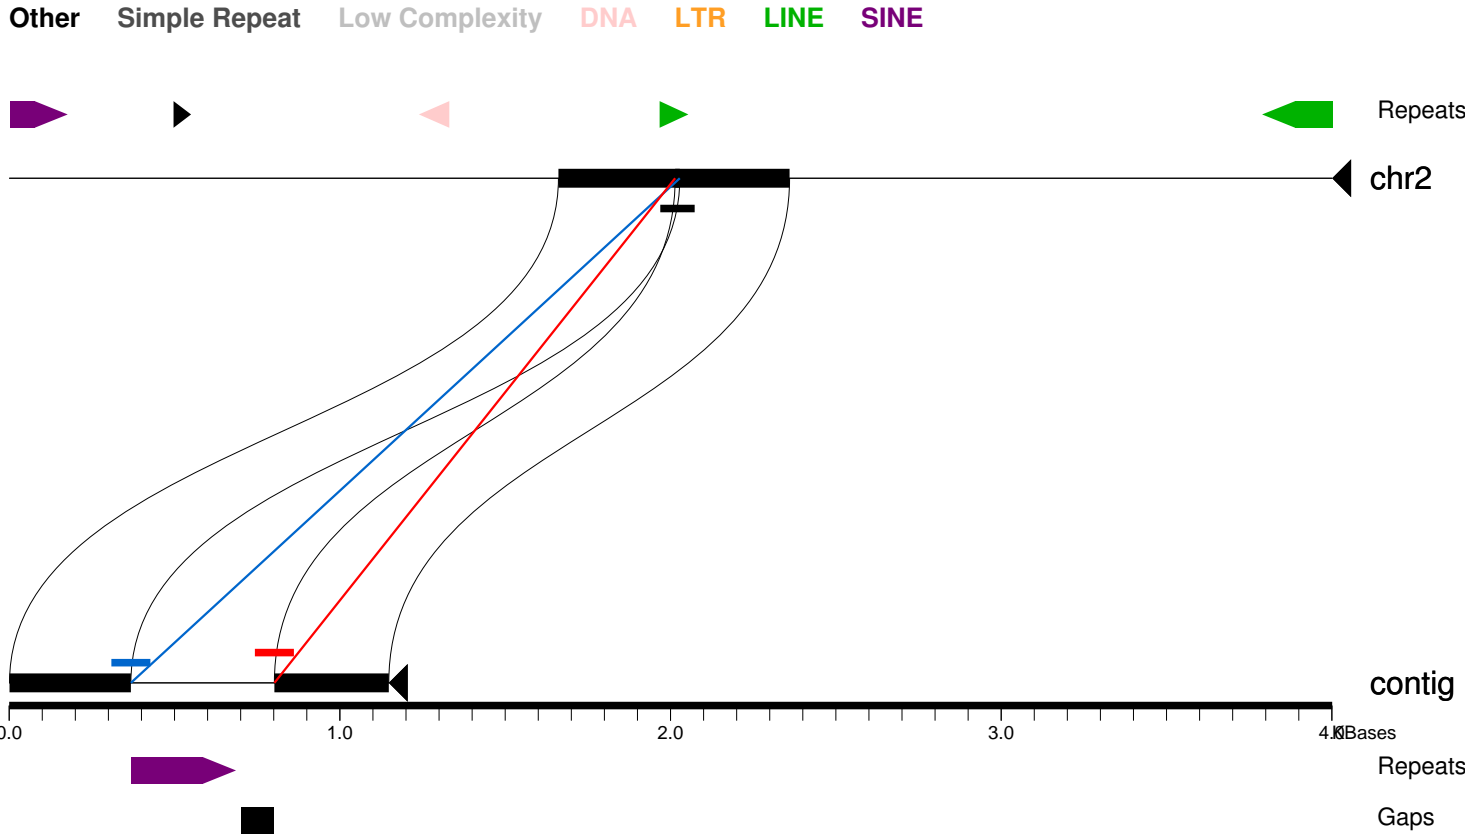

siteID: chr2\_239020847 Scafftig2 + Breakpoint: chr2:239020838

chr2:239020806-239020897

Overlap Length: 16 INS size: 316 Genotyped: Yes

```
left  CTA-----ATTC--AATTTATTTAATTATAG-----AACTACTA-----GGGCTTTCTTT
chrom CTA-----ATTC--AATTTATTTAATTATAG-----AACTACTA-----GGGCTTTCTAT
right CCACCCGCTCGGCCTCCCAAAGTGCTGGGATTACAGGCGTGAGCCACCGCGCCCGGCCGGGCTTTCTAT
      *1*1111111111111111*1*11**1*11*111****1**111111*1*1**111111111111******2*
```

```
left  TTTT TTTTTTTTTTTTTTTTTTTTCTTTTTTTTTTTGAGACGGAGTCTCGCTCTGTCGCCAGGCCGGACTGC
chrom TTTT TATGTGTTGGTTTCAGCAAATTATATTTTTCTA-GGATT-----TATTTCC-----
right TTTT TATGTGTTGGTTTCAGCAAATTATATTTTTCTA-GGATT-----TATTTCC-----
      ****2*2*2**22***2222222**2*2****222*2***2*2222222*2*22**222222222222
```

```
left  GGACTG
chrom -----
right -----
      222222
```

Other Simple Repeat Low Complexity DNA LTR LINE SINE

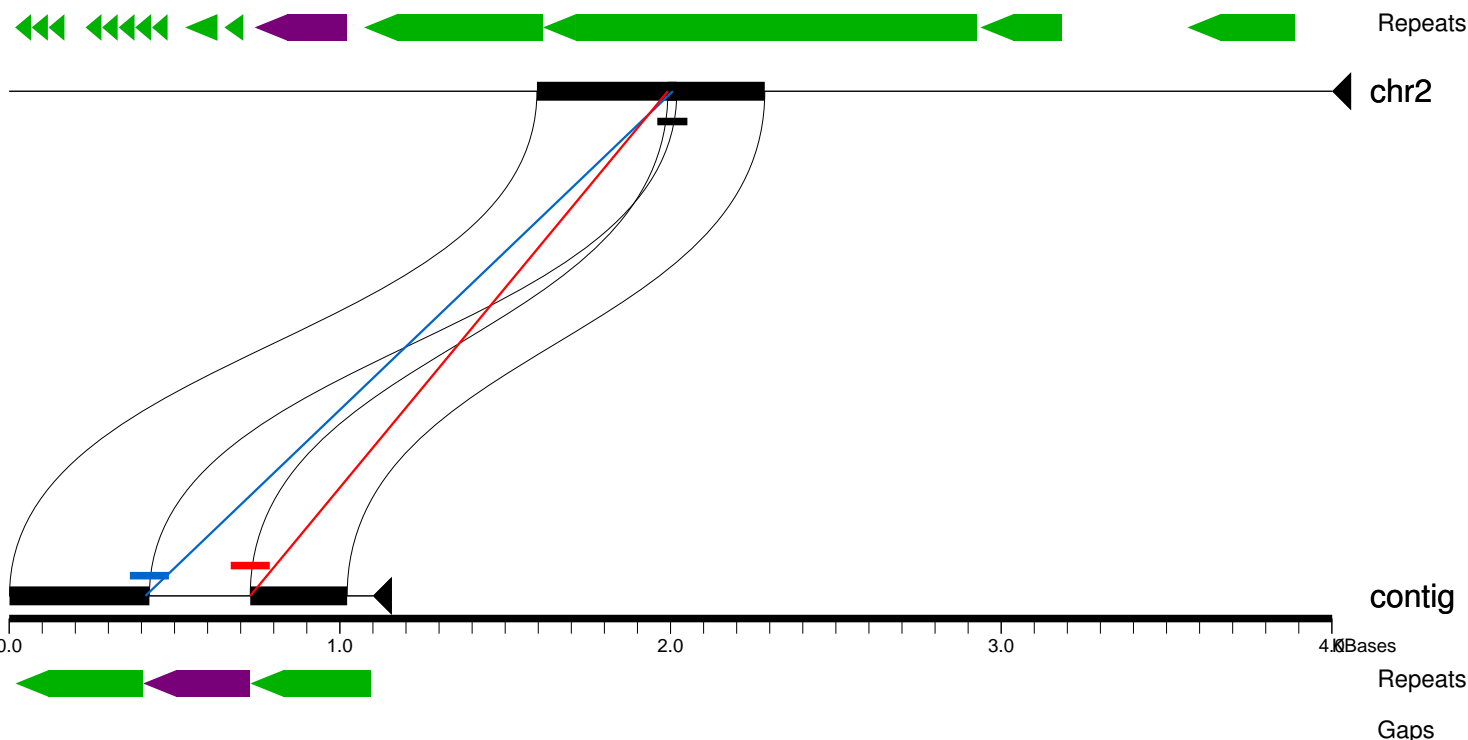

siteID: chr2\_239883393 Scafftig7 - Breakpoint: chr2:239883395

chr2:239883349-239883454

Overlap Length: 14 INS size: 315 Genotyped: Yes

```
left  GACAAC----CCACAGAGTGGGA-----AAAAAATCTTCACAATCTATACATCTGAAAAAGGACTA
chrom GACAAC----CCACAGAGTGGGA-----AAAAAATCTTCACAATCTATACATCTGAAAAAGGACTA
right CCGGCCTGGGCGACAGAGCGAGACTCCGTCTCAAAAAAAAAAAAAAAAAAAAAAAAAAAAAAAGGACTA
      11111*1111*1*****1*1**111111111*****11111*1**111*1*1*1111*****
```

```
left  ATAGGCCGGGCGCGGTGGCTCACGCCGTGTAATCCCAGCACTTTGGGAGGCCGAGGCGGGTGG
chrom ATAT-CCAGAATCTATAAATAAC-----TCAAACAAATTAGCAAGAAAAAACA-----
right ATAT-CCAGAATCTATAAATAAC-----TCAAACAAATTAGCAAGAAAAAACA-----
      **22**2*222*22*222*2**22222222**22*22*2**2*22**2222*22*222222
```

Other Simple Repeat Low Complexity DNA LTR LINE SINE

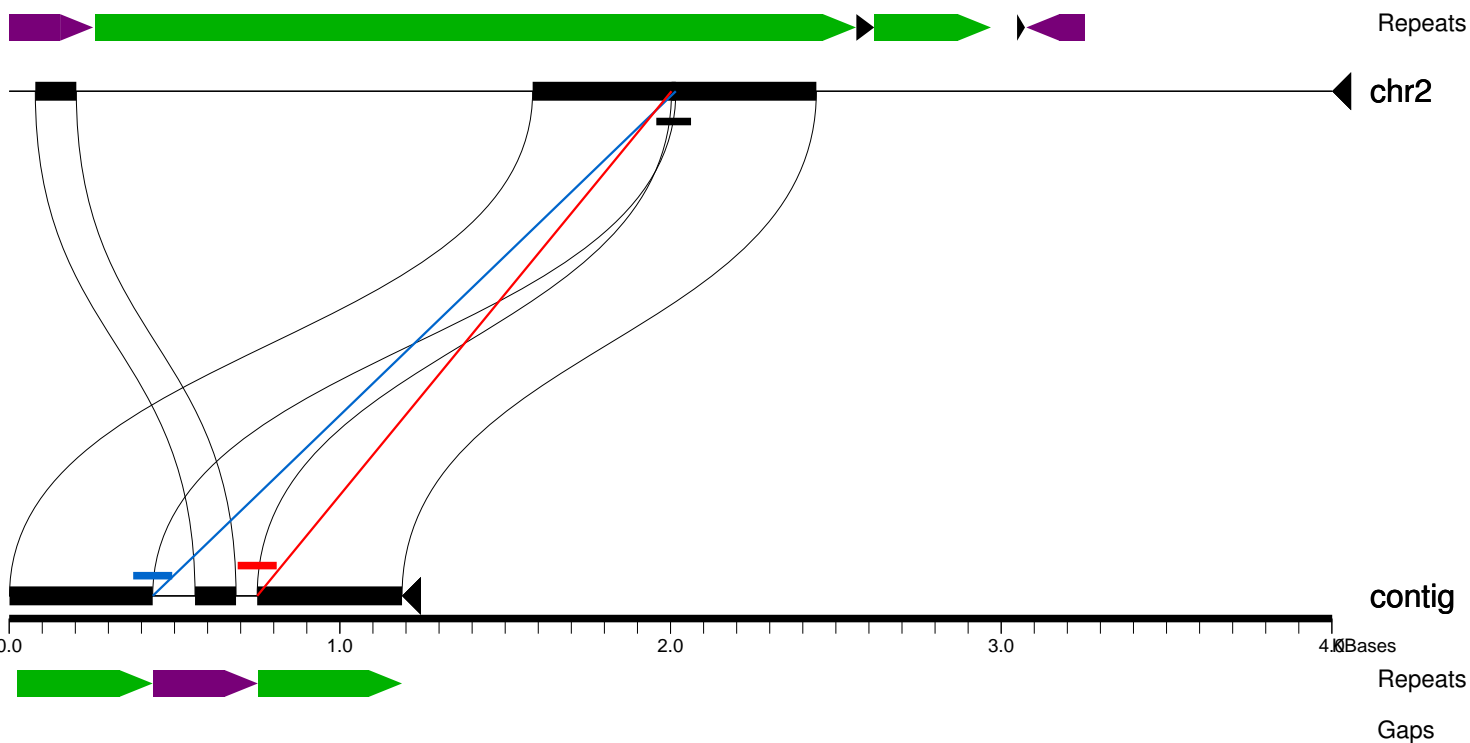

siteID: chr2\_240860722 Scafftig1 - Breakpoint: chr2:240860714

chr2:240860659-240860773

Overlap Length: 5 INS size: 418 Genotyped: No

```
left   CTGGTAGGTTTGTGGTCTCA-----CTGAC-TTCAAGAACAAAGCCACGGACCTTTGCCATGAGTGNNNN
chrom  CTGGTAGGTTTGTGGTCTCA-----CTGAC-TTCAAGAACAAAGCCACGGACCTTTGCCATGAGTGTAT
right  CCGCCCGCCTCGGCCTCCCAAAGTGCTGGGATTACAGGCGTGAGCCACCGCGCCCGGCC--GAGTGTAT
      *1*111*11*1*111**1**11111***111**11**11111*****1*11*111***11****2222
```

```
left   NNNNNNNNNNNNNNNNNNNNNNNNNNNNNNNNNNNNNNNNNNNNNNNNNNNNNNNNNNNNNNNNNNNNNNNNN
chrom  AGCTCTTAAAGGTGGCACTGACCCAAAGAGTGGAGAAGGAAAAGAACAAAGC-----
right  AGCTCTTAAAGGTGGCACTGACCCAAAGAGTGGAGAAGGAAAAGAACAAAGC-----
      22222222222222222222222222222222222222222222222222222222222222222222
```

Other Simple Repeat Low Complexity DNA LTR LINE SINE

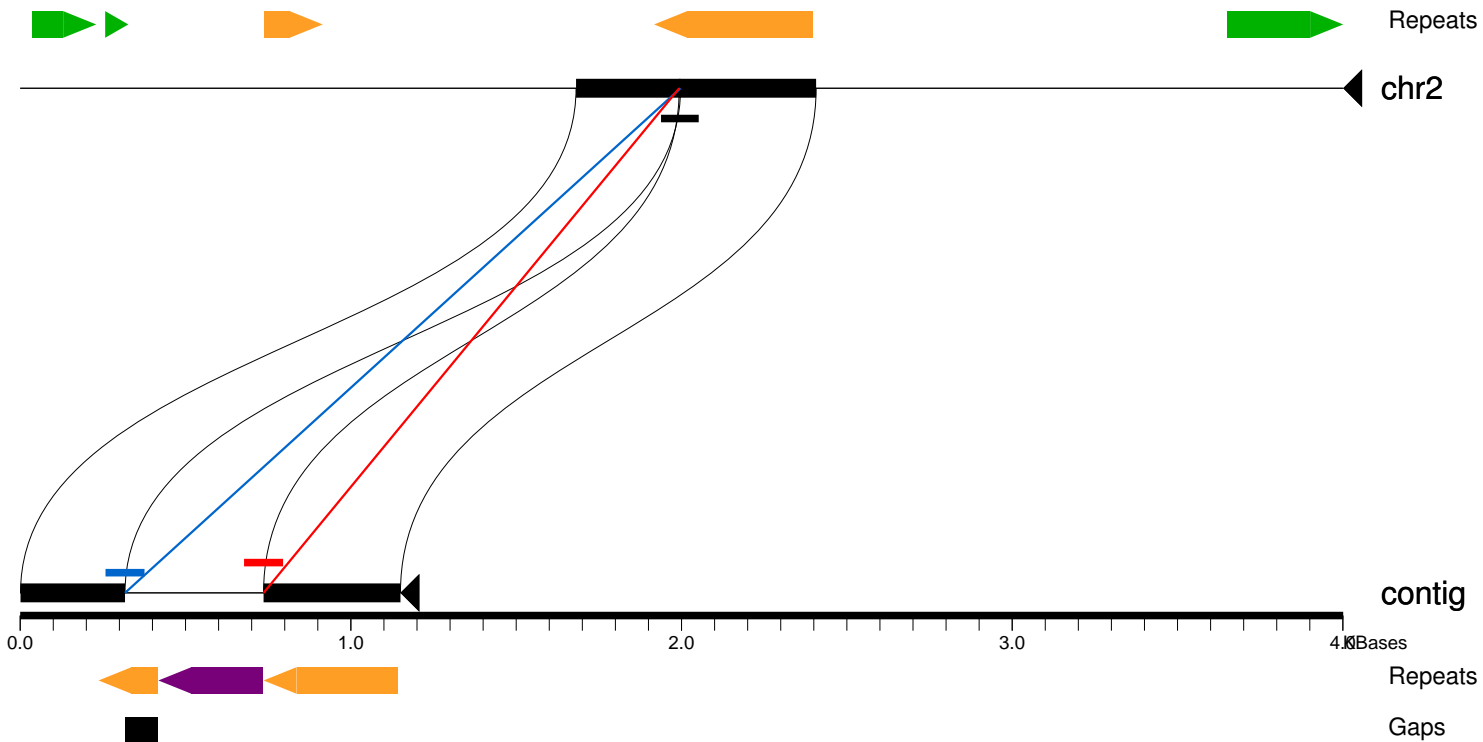

siteID: chr2\_2539942 Scaffitg8 - Breakpoint: chr2:2539935  
 chr2:2539775-2540102  
 Overlap Length: 8 INS size: 412 Genotyped: No

```
left      T-----ACCCAGAATGGGGGCTAATGACCGAGGGGTGG
chrom    TTGCACCAGCTCAGGTATGTTTCATCTCCTGAGTGTGGTACCCAGAATGGGGGCTAATGACCGAGGGGTGG
right    TTT-AGTAGAGACGGGT-TTCACC-----GTGTTAGCCAGGATGGTCTCGA-TCTCC-----TGA
          *2N 2NN22NNNN22NN2  2222N2      222N2*1****1****111*1*1*11**111111**1
```

```
left      CCCCATCCATTCCGAGAAGAGAAGAGCCACTGTCTCCCCTTGCTCTGGAGCTGCCACACATCACAGCACC
chrom    CCCCATCCATTCCGAGAAGAGAAGAGCCACCGTCTCCCCTTGCTCTGGAGCTGCCACACATCACAGCACC
right    CCTCGTGA--TCCGCC-----GCCTCGGCCTCCCAAAGTGCTGG-----ATTACAG-----
          **1*1*1111****111111111111**1*N*1****111*11****111111111111**1****1111
```

```
left      CTGGAATGCCCGCAGCCC--TTCAGCGGGNNNNNNNNNNNN-----
chrom    CTGGAATGCCCGCAGCCC--TTTCAGCGGGTATTTTTTAATGGGATGAGGAGCGAGTTTGGGAGGGGCAC
right    CGTGAGCCACCGC-GCCCGGTCCTCAGCGGGTATTTTTTAATGGGATGAGGAGCGAGTTTGGGAGGGGCAC
          *11**1111****1****11*1*****22222222222222222222222222222222222222
```

```
left      -----
chrom    GTGGGAAGACTTTCATCTTTCTTTTAAATTTTCAGGCTCAAGGACAAGGTGACCAAAAAATCCTCTGGTCAGC
right    GTGGGAAGACTTTCATCTTTCTTTTAAATTTTCAGGCTCAAGGACAAGGTGACCAAAAAATCCTCTGGTCAGC
          222222222222222222222222222222222222222222222222222222222222222222222
```

```
left      -----
chrom    AAGGGACAAGCCCAAAGACAGGGGCTGGGTCTGTGTGCTGTGCTAGTTCC
right    AAGGGACAAGCCCAAAGACAGGGGCTGGGTCTGTGTGCTGTG-----
          222222222222222222222222222222222222222222222222222222222222
```

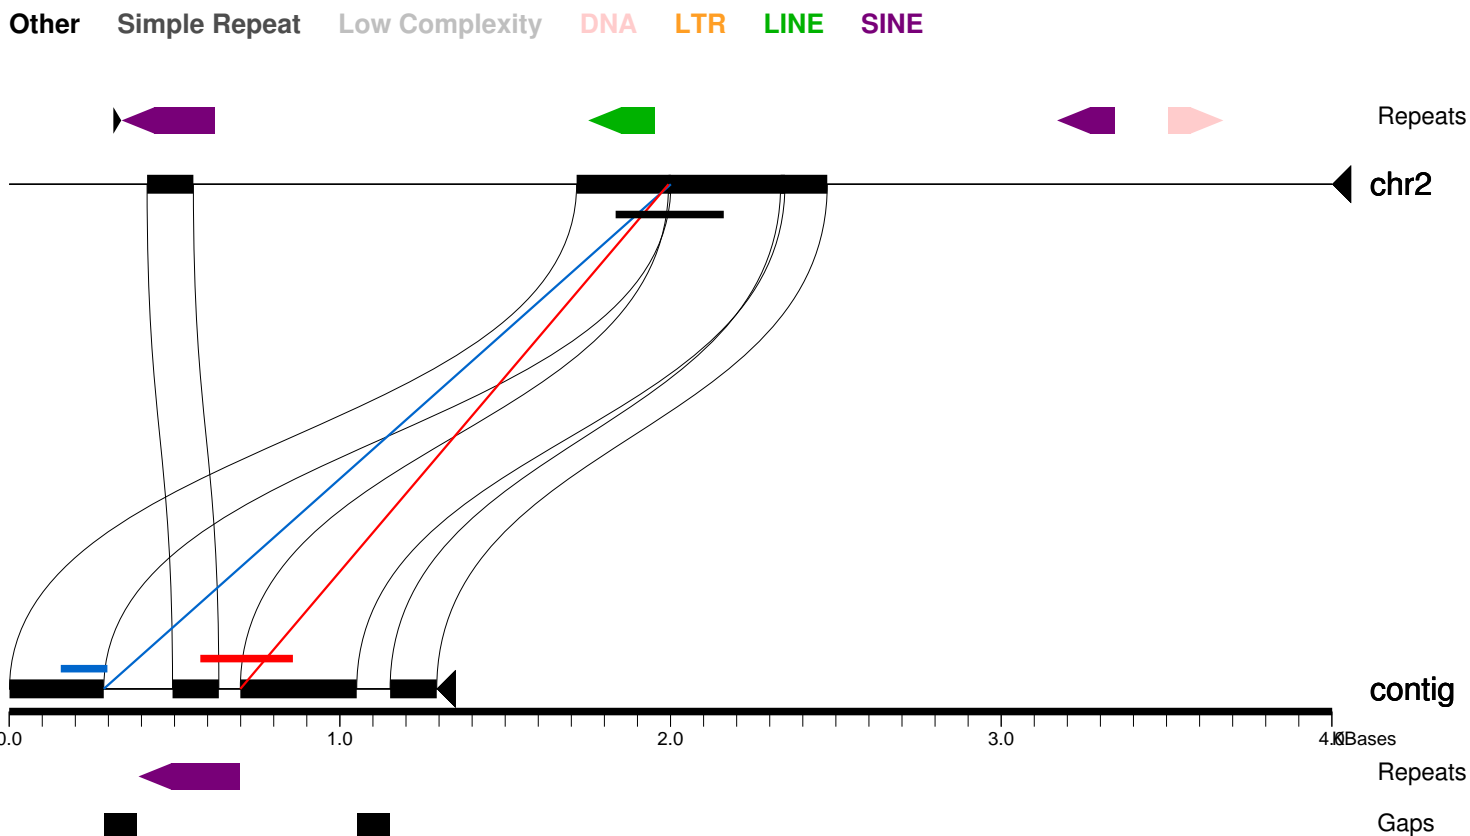



siteID: chr2\_31559684 Scaffitg10 + Breakpoint: chr2:31559682  
 chr2:31559522-31559856  
 Overlap Length: 15 INS size: 305 Genotyped: Yes

```

left  -----TG-GGGACCCATATGCCTCCTTCACCCACTGTGTTGAGGTCTGCGGATGGTGGAT
chrom CAAGGAAGACCTGAATG-GGGACCCATATGCCTCCTTCACCCACTGTGTTGAGGTCTGCGGATGGTGGAT
right  --AGAATGGCGTGAACCCGGGAGGCGGA-GCTTGC-----AGTGAGCCGAGATC-----
      22N2N2N2N2222111****11*11*1**1*1*1111111*1**1*11***1**111111111111111

left  TTGTCTGCCCTGGGGTTCCCTCTGTGCCCTCCCCACTTGGGACCACATGTACCCACTTTACCTATAAAATC
chrom TTGTCTGCCCTGGGGTTCCCTCTGTGCCCTCCCCACTTGGGACCACATGTACCCACTTTACCTATAAAATC
right  ----CCGCCACTG-----CACTCCAGCCTGGGCGACAGAGCGAGACTCCGTCTCAAAAAAAAA
      1111*1***1***11111111111111*1****111*1**111*1*111*11*1*11*11*1*1***11

left  CAAAAAGCATATCGAATTTTAAAAAGAGGAAGCCC CGGCCGGGCGC--GGTGG--CTCACGCCTG-TAAT
chrom CAAAAAGCATATCGAATTTTAA AAAAGAGAAAGCCC ACCTGAGTATCAGGAAGAACCAGTCCTGCTAAC
right  AAAAAAAAAAAAAAAAAA-----A AAAAAGGAAGCCCCACCTGAGTATCAGGAAGAACCAGTCCTGCTAAC
      1*****11*1*111**111111* ***1**N***** *22*2*2*22222**22*22*2**22****2***2

left  CCCAG-CACTTTGG-GAGGCCGAGGC-----GGGCGGATCACGAGGTCAGGAGATC---GAG
chrom TCCACACAGGTTGCAGTTGCAAAGGCAATTAAGCCACTGTACAGAGCCC-ACTTCAGCACCCTCAGAG
right  TCCACACAGGTTGCAGTTGCAAAGGCAATTAAGCCACTGTACAGAGCCC-ACTTCAGCACCCTCAGAG
      2***22*22***22*22**22****222222222222*22*2**2*2*2*22****2*222*222***

left  ACCATCCCG--CTAA-----AACGGTGAACC-CCGTCTCTACTAAA-----
chrom GCTGGGCTGGTTCTGAGATCCCCAAAAGCGGAAGCAACCGTC-CTAGCAAAGTCTTCTTT
right  GCTGGGCTGGTTCTGAGATCCCCAAAAGCGGAAGCAACCGTC-CTAGCAA-----
      2*2222*2**22*2*2222222**2*22***2*22****2**22***1
  
```

Other Simple Repeat Low Complexity DNA LTR LINE SINE

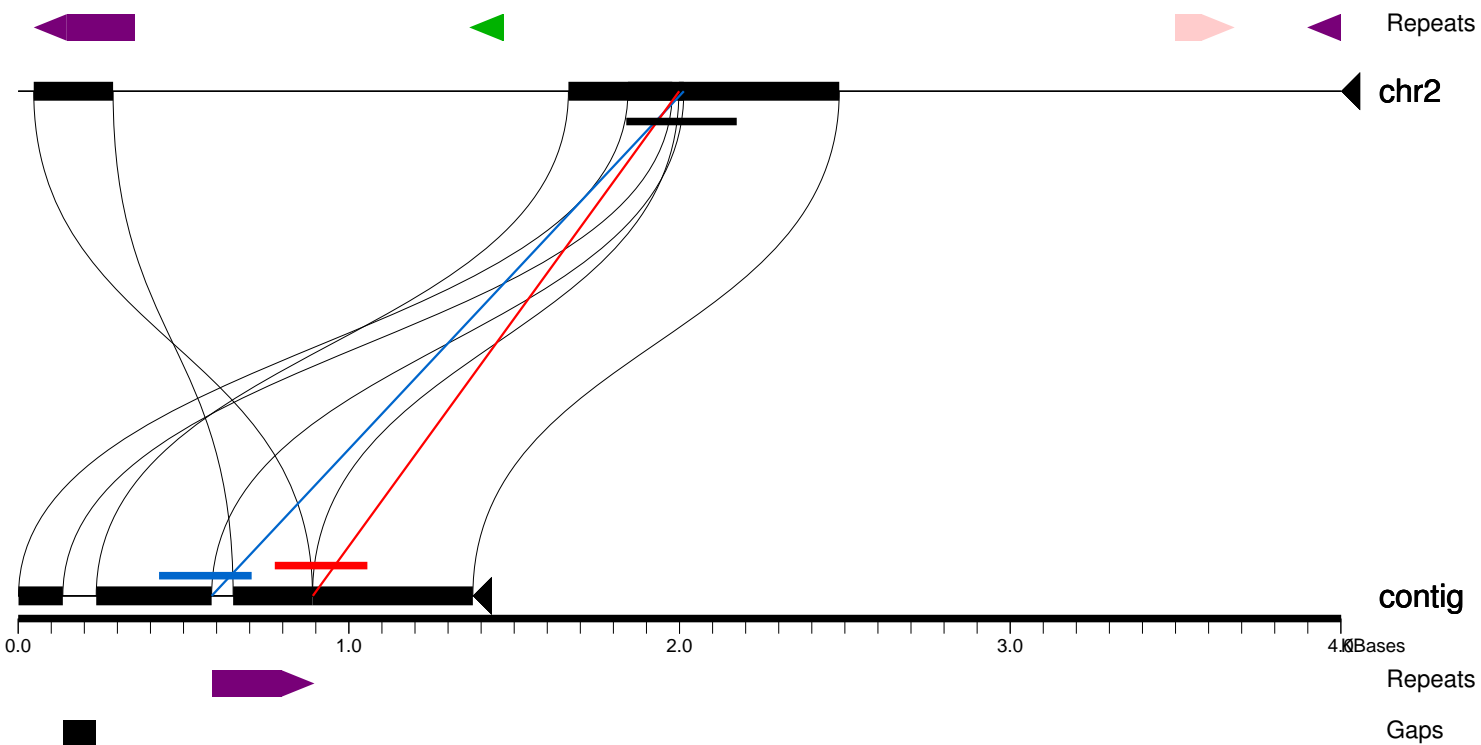





siteID: chr2\_33404751 Scaffitig4 - Breakpoint: chr2:33404725

chr2:33404677-33404784

Overlap Length: 12 INS size: 282 Genotyped: Yes

```
left CCTTCATAATGATT-ATATATTTAG--TGAGTTTTAAGTTAAAACTTTTAG-----AAATTTAATTA
chrom CCTTCATAATGATT-ATATATTTAG--TGAGTTTTAAGTTAAAACTTTTAG-----AAATTTAATTA
right AGTCCGGCCTGGGCGACAGAGCGAGACTCCGTCTCAAAAAAAAAAAAAAAAAAAAAAAAAAAAAAAATTTAATTA
11*1*1111*1111*1*1*111*11*11*1*1*111****11111*1111111111*****
```

```
left GCCAGCACTTTGGGAGGCCGAGGCGGGTGGATCATGAGGTCAGGAGATCGAGACCATCCT
chrom G-----AATCTGG-----CTAATGGGTTATTTAAAAATGT-AAAATAAGGTTTAAAAACC
right G-----AATCTGG-----CTAATGGGTTATTTAAAAATGT-AAAATAAGGTTTAAAAACC
*22222*2*2***22222*2*222**2*222*2*22*2**2*22*2*22*22222*22*2
```

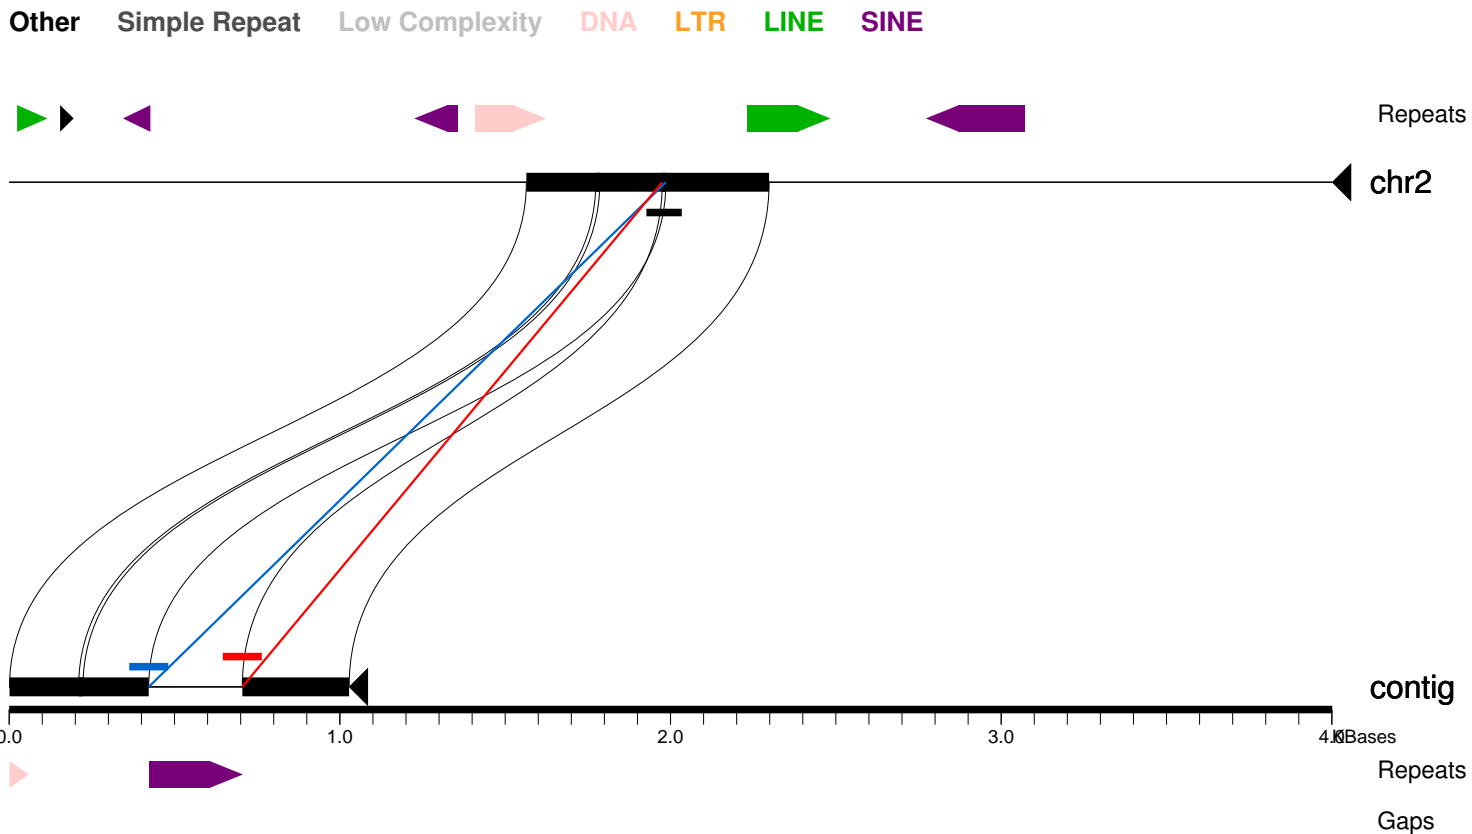

siteID: chr2\_34255394 Scaffitg3 + Breakpoint: chr2:34255379

chr2:34255219-34255552

Overlap Length: 14 INS size: 301 Genotyped: Yes

```
left -----TAAAGTCTTCAAAAACACACAAAAAACCACTGCATTAGGCTACTTCATATTGCAC-CCAGT
chrom AAAAAAGATGTAAAGTCTTCAAAAACACACAAAAAACCACTGCATTAGGCTACTTCATATTGCAC-CCAGT
right -----TTTAGTAGAGACGGGGTTTCACCGTTTTAGCCGGGATGGTCTCGATCTCCTGA
          11111111**1*11*1*1**11111111***1*11****1*1111*11*1*1*11*1**1*1
```

```
left TTTAGACTTGATTTGCAGAAGGTTGTTCCCTTTAAAAATCCTTTTTGTCCCTTTTTGAAATTAATATACTGCA
chrom TTTAGACTTGATTTGCAGAAGGTTGTTCCCTTTAAAAATCCTTTTTGTCCCTTTTTGAAATTAATATACTGCA
right CCTCG---TGATCCGCCC--GCCTCGGCCTCCCAAA-----GTGCT----GGGATTACAGGCCTGAG
          11*1*111****11**1111*11*111**111**11111111**1**1111*11****111111**11
```

```
left ACACCTGTTAATATGGCTGGACCATTCACAGTTCCTTTTTCTTTTTTTTTTTTTTTTGA-----GACGGA
chrom ACACCTGTTAATATGGCTGGACCATTCACAGTTCCTAATTTGAATCATTTAGCTGTTTAAAAAATGATAGG
right CCACCGC-----GCCCGGCCATTTCACAGTTCCTAATTTGAATCATTTAGCTGTTTAAAAAATGATAGG
          1****11111111111**11*1*****22***222*22***222*2***2*22222**22*2
```

```
left GTCTCGCTCTGTGCGCCAGGCTGGAGTGCAGTGGCGGGATCTCGGCTCACTGCAAGCTCCGCTCCCG--
chrom GAGTAGCTTTTCATCCCTTTGGTGGTATGCTGAGATTTAAATGCTGACTTTCTCAAGCCTTAGCAGGCAGTC
right GAGTAGCTTTTCATCCCTTTGGTGGTATGCTGAGATTTAAATGCTGACTTTCTCAAGCCTTAGCAGGCAGTC
          *22*2***2*2222**222*2***22***2*2*22222**222*2**22*22*22**22**222*2*22
```

```
left -----GG----TTCAC--GCCATTCTC-----CCG-----
chrom TAAGTGAGGACACTTCAGAAGAGATGCTGAACAGACCTGAGAAGCCGCAAAACATC
right TAAGTGAGGACACTTCAGAAGAGATGCTGAACAGACCTGAGAA-----
          2222222**2222****222*22**2**2222222222222 111
```

Other Simple Repeat Low Complexity DNA LTR LINE SINE

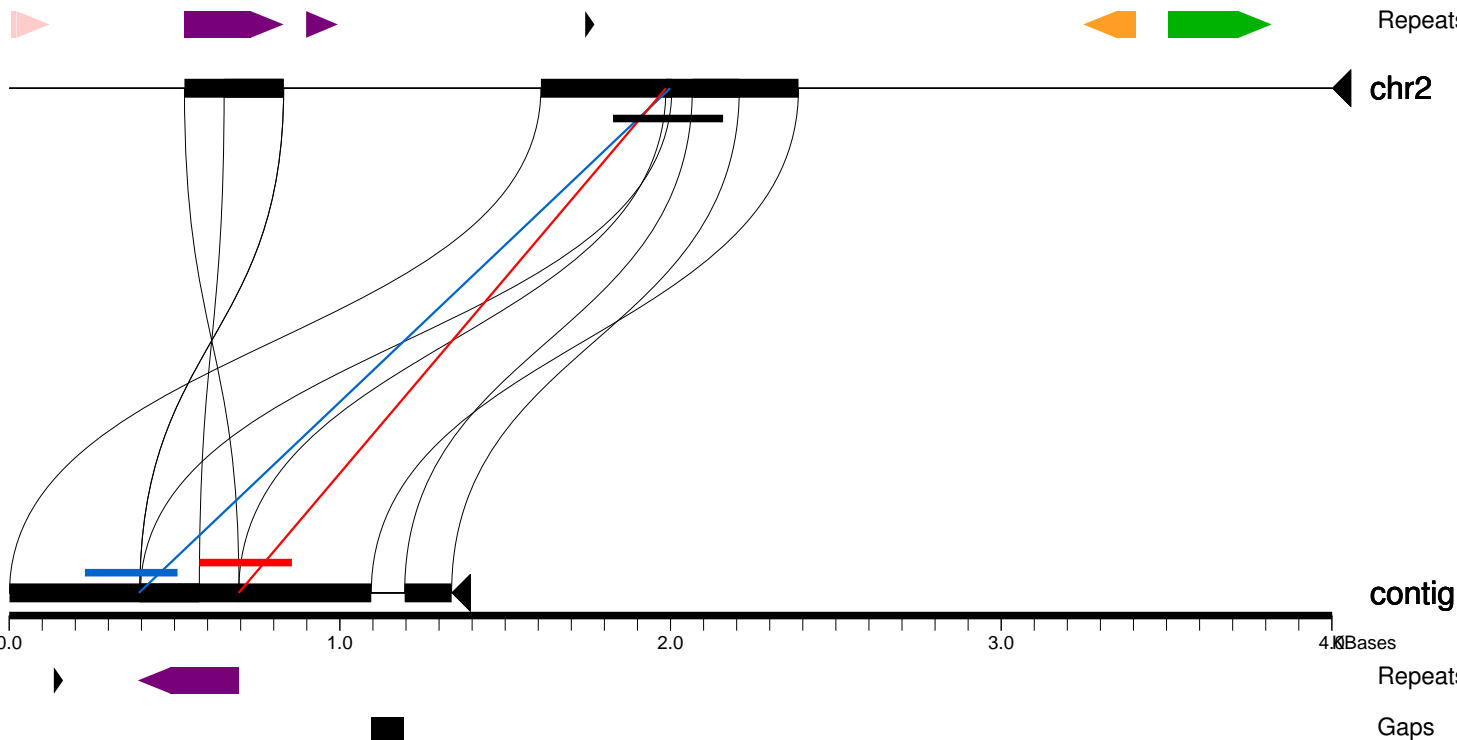

siteID: chr2\_34356949 Scaffitig1 + Breakpoint: chr2:34356969

chr2:34356921-34357028

Overlap Length: 12 INS size: 317 Genotyped: Yes

```
left  ATACACA---AGGTACTCCACA----TAGAATTAACTGTTATGTTTCATCAAAAAT-----ACATTTTTAT
chrom ATACACA---AGGTACTCCACA----TAGAATTAACTGTTATGTTTCATCAAAAAT-----ACATTTTTAT
right CCGCCCGCCTCGGCTTCCC AAAAGTGCTGGGATTA-CAGGCGTGAGCCACCGCGCCCGGCCACATTTTTAT
      111*1*11111**1111***1*1111*1*1****1*1*111**111**1*1111111111*****
```

```
left  TTTTTTTTATTTTTTTTTTATTTTTTTTTTTTTTTTTTTTGGAGACGGAGTCTCGCTCTGTCGCCCA
chrom TTATGG--AGGATTTAACAGTCAATCATAAGCATGGACA-----ACATCATGTCT--CA
right TTATGG--AGGATTTAACAGTCAATCATAAGCATGGACA-----ACATCATGTCT--CA
      **2*2222*222***222*2*222*22*22222*2**2*22222222*2222****222**
```

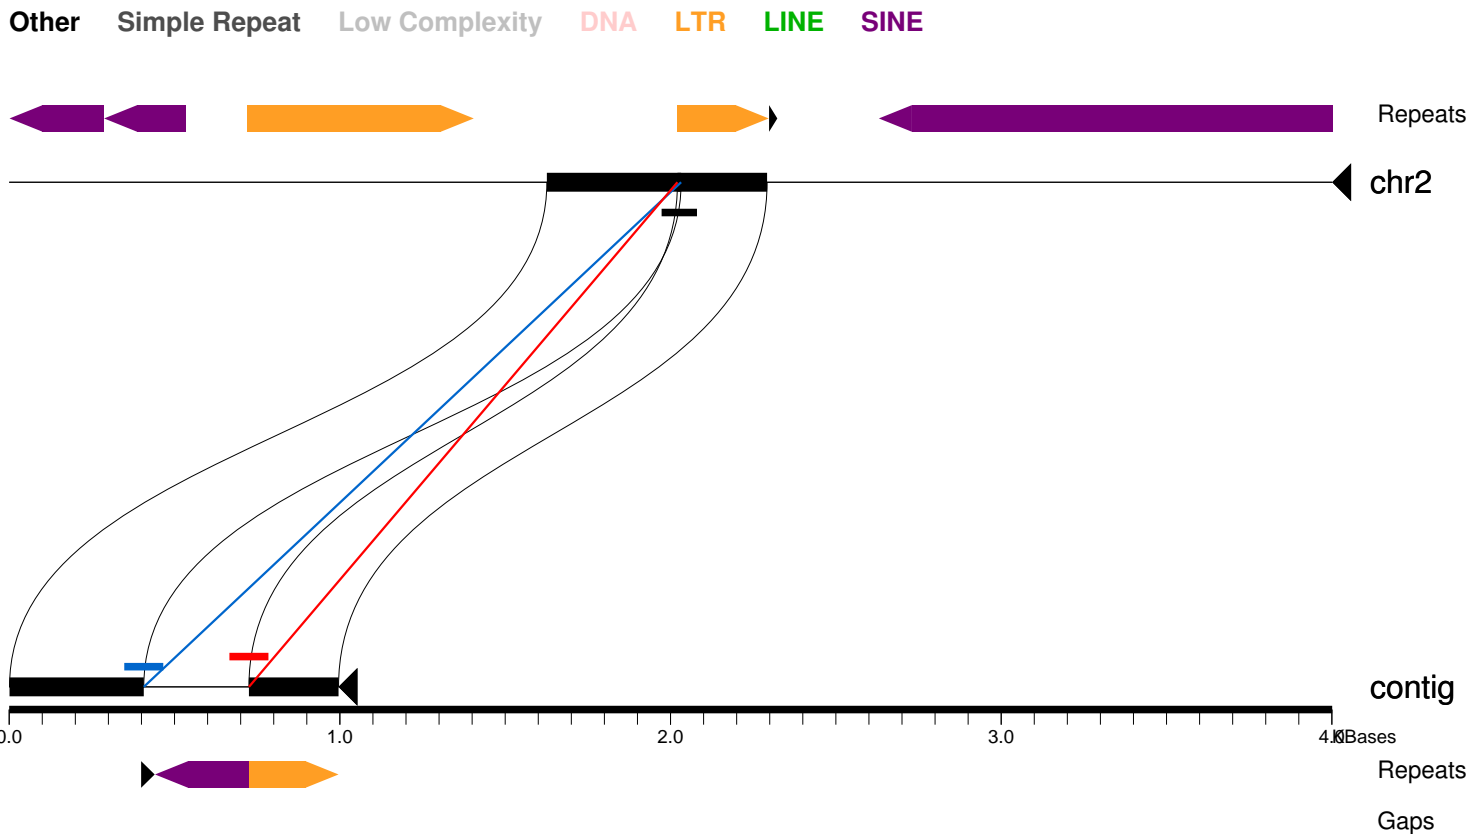

siteID: chr2\_34473631 Scaffitg1 + Breakpoint: chr2:34473663

chr2:34473503-34473835

Overlap Length: 13 INS size: 147 Genotyped: Yes

```
left -----CATTGCTTATCGCATACTAAATACTCAGAAAAATAGTTTTTTTTCTCTTTGTAGGTGGAATTGG
chrom GTTTGACACATTGCTTATCGCATACTAAATACTCAGAAAAATAGTTTTTTTTCTCTTTGTAGGTGGAATTGG
right AGT---CTCGCTCTGTCGCCCAAGCTGGAGTG-CAGTGGCGGGATCTCGGCTCACTGCAAGC----TCCG
NN2 2N*11*111*11*1**11**11*1111***111111*1*1*111***11**1*1*11111*11*
```

```
left AATTGCTGTATAGCAAAAACCTTTCTACAATTGAAATTATTCAGACCACAGGGATACATTTTATAAGCTGAC
chrom AATTGCTGTATAGCAAAAACCTTTCTACAATTGAAATTATTCAGACCACAGGGATACATTTTATAAGCTGAC
right CCTCCCGGGTT--CACGCCATTCTCC---TG-----CCTCAGCCTCCCAAGT----AGCTGGG
11*11*1*11*11**111*1****1*111**111111111111**1***11111*11*1111****11
```

```
left ACTCATCAAAGCATATACATGAGAGTAGTTCTT-----TTTTTTTTTTTT-----TT-----
chrom ACTCATCAAAGCATATACATGAGAGTAGTTCTTAAAGATGCTTCTATTTCTCTAAGGTTATCTAGCTAGAA
right ACT-----ACAGGCAGAGTAGTTCTTAAAGATGCTTCTATTTCTCTAAGGTTATCTAGCTAGAA
***111111111111*1*111*****222222**2*2***2*2*2222**222222222222
```

```
left -TTTTTTGAGACGG--AGTCTCGCTC-----TGTCGCCCAAGCTGGAGTGCAGTGGCGGGATCTCGGCT
chrom GTTTTTAGAGATGGTTCAGTTCAGCTGGTAACGTCTATCCCAAACATTTTTTTTACCCCAAGA-CTTGGTT
right GTTTTTAGAGATGGTTCAGTTCAGCTGGTAACGTCTATCCCAAACATTTTTTTTANNNNNNNNN-NNNNNNN
2*****2***2**22***222***222222*2*22*****2*22222*2222NNN1NN11211N1N1
```

```
left --CACTGCAAGCTCC-----GCCTCCCGGGTTCACGCCATTC---TCCTG-C
chrom AACACTTCTATGTTAAAAATGATGCAGAACTGTAAACCTCATTCATTACTGGC
right NNNNNNNNNNNNNNNNNNNNNNNNNNNNNNNNNNNNNNNNNNNNNNNNNNNNNNNNNNNNNNNNNNNNNNN
NN1111N1N1NN1NNNNNNNNN11NNNN1NN11NN11NN11111 1N111 1
```

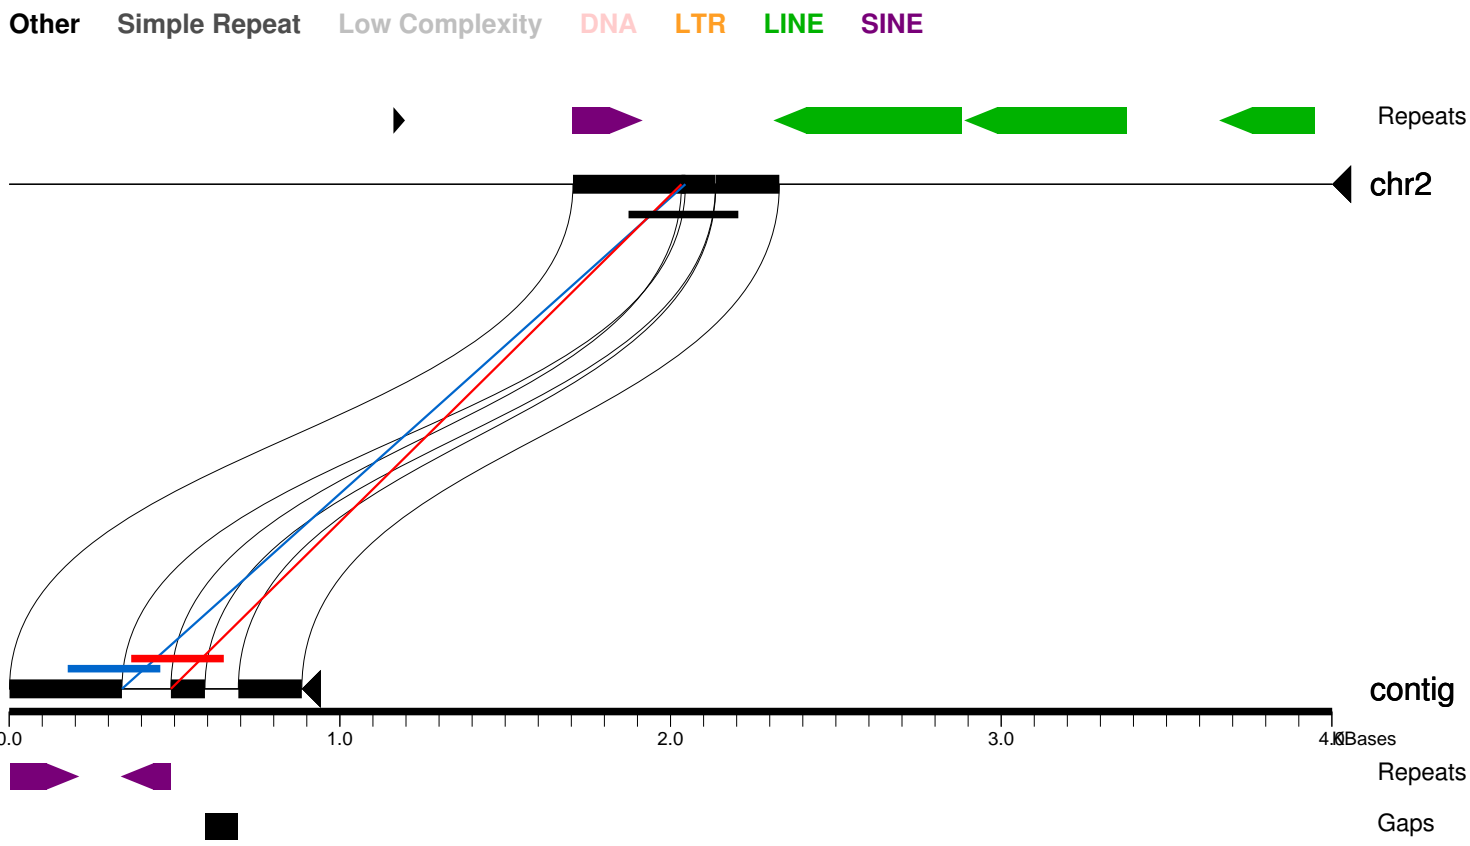





siteID: chr2\_41985109 Scaffitig3 - Breakpoint: chr2:41985107

chr2:41985061-41985166

Overlap Length: 13 INS size: 295 Genotyped: Yes

```
left      T-----AAGAAAGTTTGAAAAAT-----AACAAAAACACATATGTACGGGGGTATGTCAAAGACTCAGA
chrom     T-----AAGAAAGTTTGAAAAAT-----AACAAAAACACATATGTACGGGGGTATGTCAAAGACTCAGA
right     AGCCTGGGCGACAGAGCGAGACTCCGTCTCAAAAAAAAAAAAAAAAAAAAAAAAAAAAAAAAAAAAGACTCAGA
          1111111111**1**111**1*1*11111111**1****1*1*1*111*11111111*1111*****

left      AGCGGCCGGGCGCGGTGGCTCACGCCTGTAATCCCAGCACTTTGGGAGGCCGAGGCGGGCGG
chrom     AG---CCAAATGAAAAAACTCCC-----AATGGC--CAAAGCGGGAA--CAATTCAGCAA
right     AG---CCAAATGAAAAAACTCCC-----AATGGC--CAAAGCGGGAA--CAATTCAGCAA
          **222**2222*222222***2*222222***22*22**2222***222*2*22*22**22
```

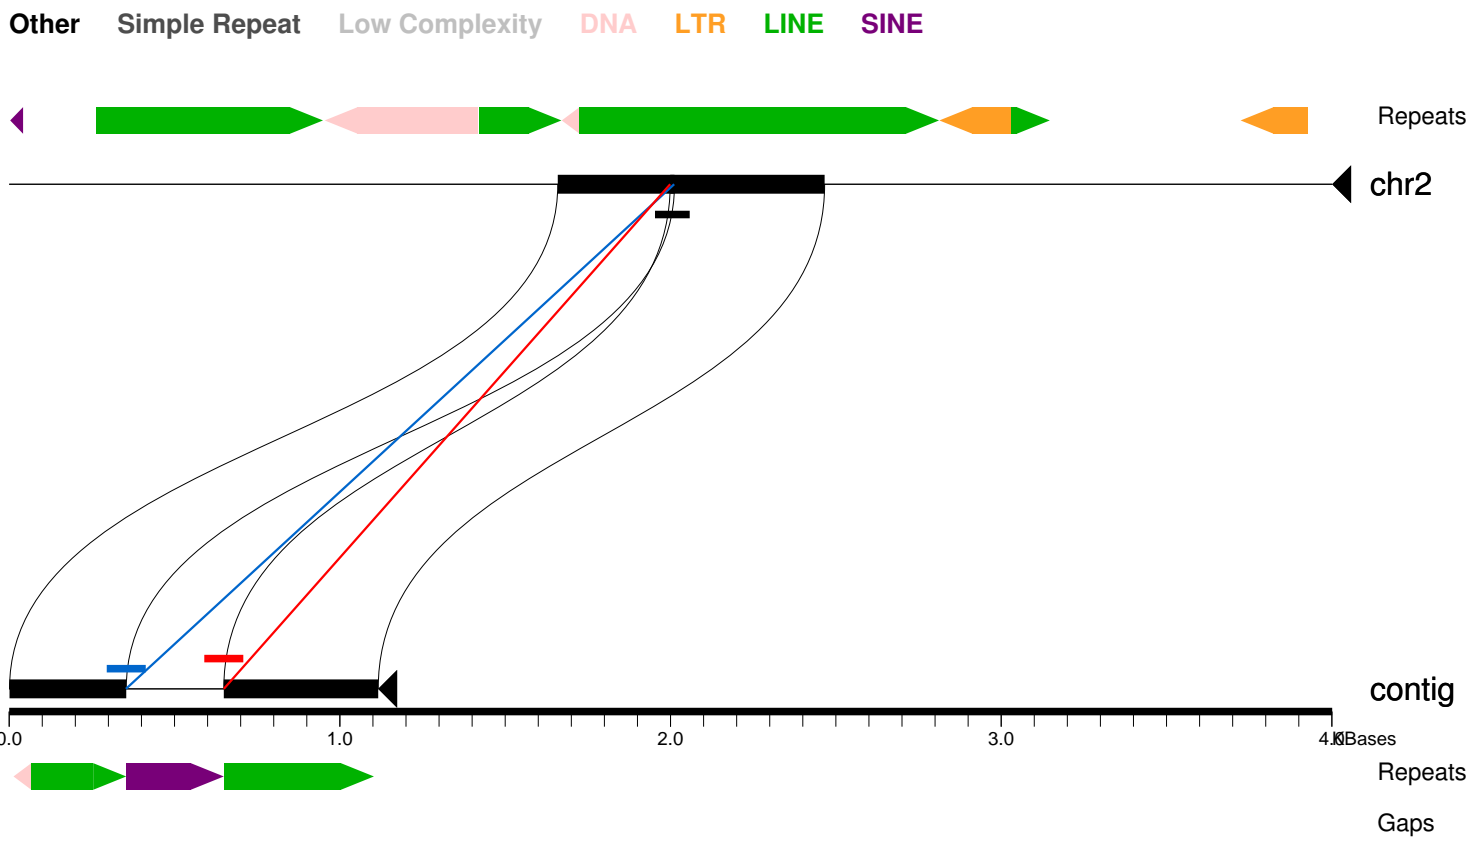

siteID: chr2\_43024062 Scaffitig7 + Breakpoint: chr2:43024068

chr2:43024016-43024127

Overlap Length: 8 INS size: 300 Genotyped: Yes

```
left  T-CAAAACTAGAC-----AAAACCTCTCTCACTACTAAA--AACGCATATAGACAGGGAAGCATTTTTTCATTT
chrom T-CAAAACTAGAC-----AAAACCTCTCTCACTACTAAA--AACGCATATAGACAGGGAAGCATTTTTTCATTT
right CGCCCGCCTCGGCCTCCCAAAGTGCTGGGATTACAGGCGTGAGCCACCGCGCCCGGCCA-CATTTTTTCA
      11*11111*1*1*11111***111*111*1***1111111*11*1111*1*1*11*1*****22
```

```
left  TTTTTTTTTTTTTTTTTTTTTTTTTTTT---TTTTTTGAGACGGAGTCTCGCTCTGTCGCCCAGGC
chrom AGTTATACTAATAAAGTTGACTTGGATGCTTTAATA-----GCTTTCATGAATAAT-
right AGTTATACTAATAAAGTTGACTTGGATGCTTTAATA-----GCTTTCATGAATAAT-
      22**2*22*22*222**222**222*22**2*2*222222222***2*222*222*222
```

Other Simple Repeat Low Complexity DNA LTR LINE SINE

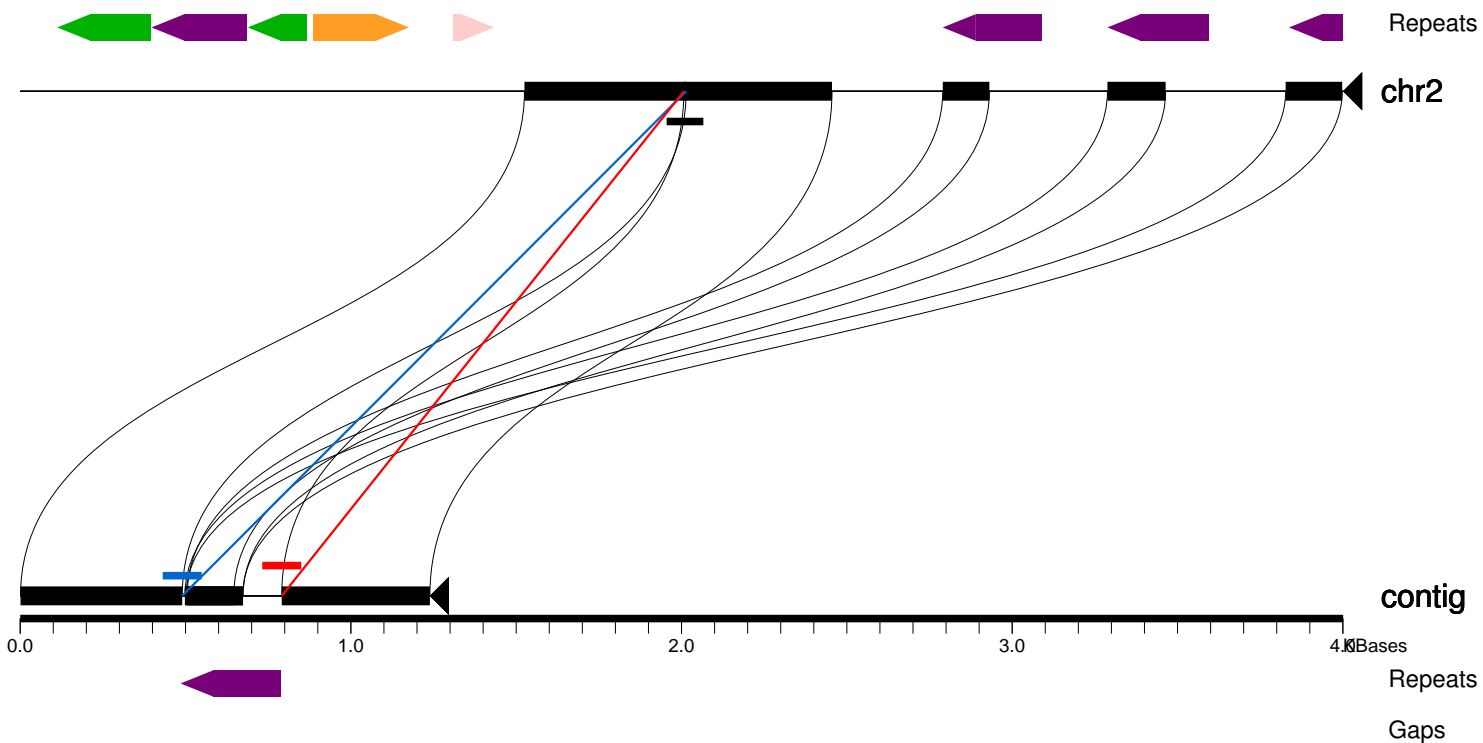



siteID: chr2\_44825838 Scaffitg16 - Breakpoint: chr2:44825836

chr2:44825791-44825895

Overlap Length: 15 INS size: 304 Genotyped: Yes

```
left  ATCTT-AGCT-----CAGAA-GAACCTAATTTGCAGCAAGCTTAGGACCTTT-----AAAATCAGAAG
chrom ATCTT-AGCT-----CAGAA-GAACCTAATTTGCAGCAAGCTTAGGACCTTT-----AAAATCAGAAG
right CACTCCAGCCTGGGCGACAGAGCGAGACTCCGTCTCAAAAAAAAAAAAAAAAAAAAAAAAAAAAAAAA*AAAATCAGAAG
      11**11***111111111****11**11**111*11**11**1111*11*11111111111******
```

```
left  TCCTTGGCCGGGCGCGGTGGCTCACGCCTGTAATCCAGCACTT-TGGGAGGCCGAGGCGGGCGG
chrom TCCTT-----TGGGTCTTGTCTT--AGCAACTTACTTGTAAAGGCTCTGGGTG--GG
right TCCTT-----TGGGTCTTGTCTT--AGCAACTTACTTGTAAAGGCTCTGGGTG--GG
      ***2222222222222222***2**22*2**222*2*22222*****2*222*****222**22*22**
```

Other Simple Repeat Low Complexity DNA LTR LINE SINE

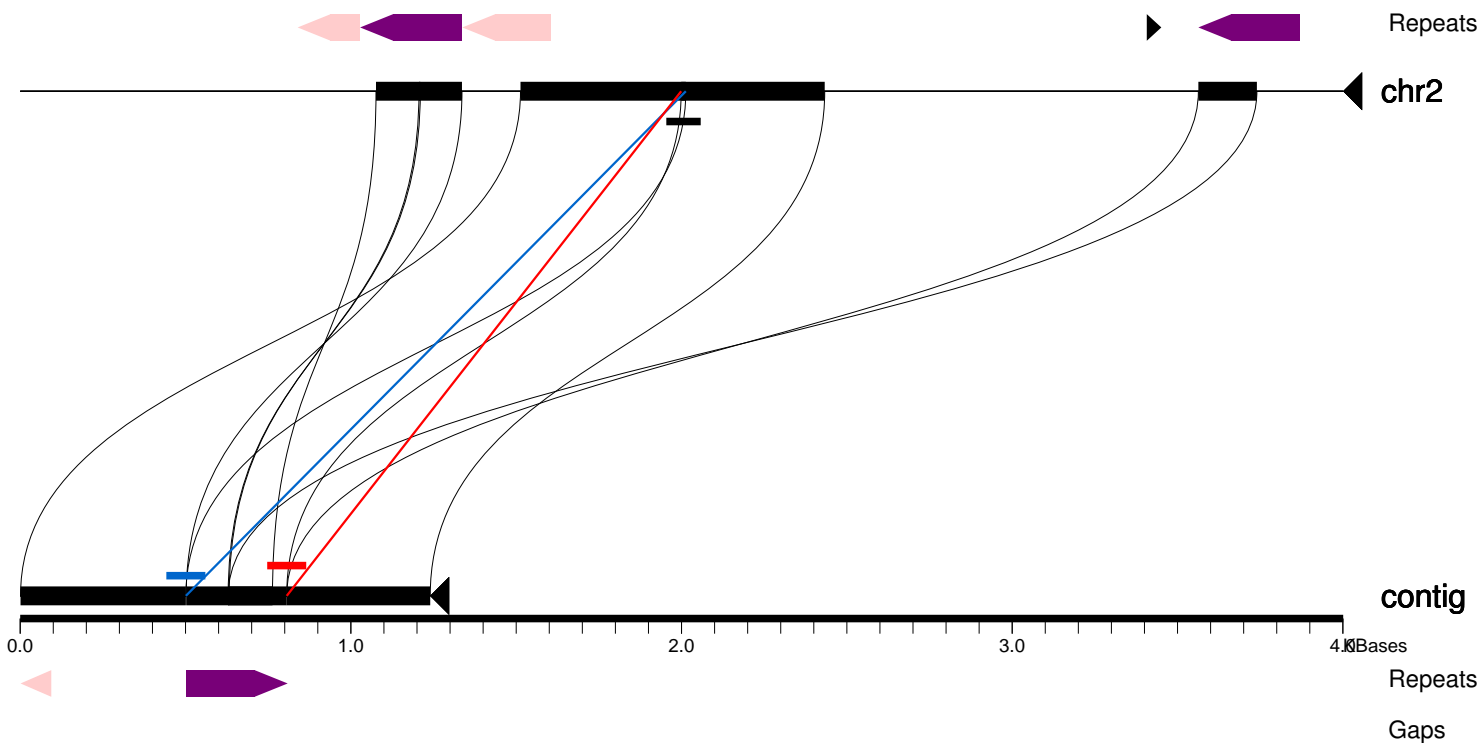



siteID: chr2\_46928965 Scaffitig6 - Breakpoint: chr2:46928951

chr2:46928894-46929010

Overlap Length: 3 INS size: 287 Genotyped: Yes

```
left  GTCATTTAGGTGAAAAATATTAAAT--GAATGCCCTAGAG-TAGTTTAGCATTCTATAATTTT
chrom GTCATTTAGGTGAAAAATATTAAAT--GAATGCCCTAGAG-TAGTTTAGCATTCTATAATTTT
right CTGACCTCG-TGATCCGCCCGCCTCGGCCTCCCAAAGTGCTGGGATTACAGGCGTGAGCC
1*1*11*1*1***1111111111*11*11*1**11**1*1*11*11**11*111*111***2*22*22
```

```
left  TTTTTTTTTTTTGGAGACGGAGTCTCGCTCTGTCGCCAGGCTGGAGTGCAGT--
chrom AATTAATTGCTTAAAA--GATTTTCAAAATTCAGA--AGGCTTCTATATTTTGA
right AATTAATTGCTTAAAA--GATTTTCAAAATTCAGA--AGGCTTCTGATTTTTGA
22**22**22**2*2*22**2*2**2222*222*222*****222N*2222*22
```

Other Simple Repeat Low Complexity DNA LTR LINE SINE

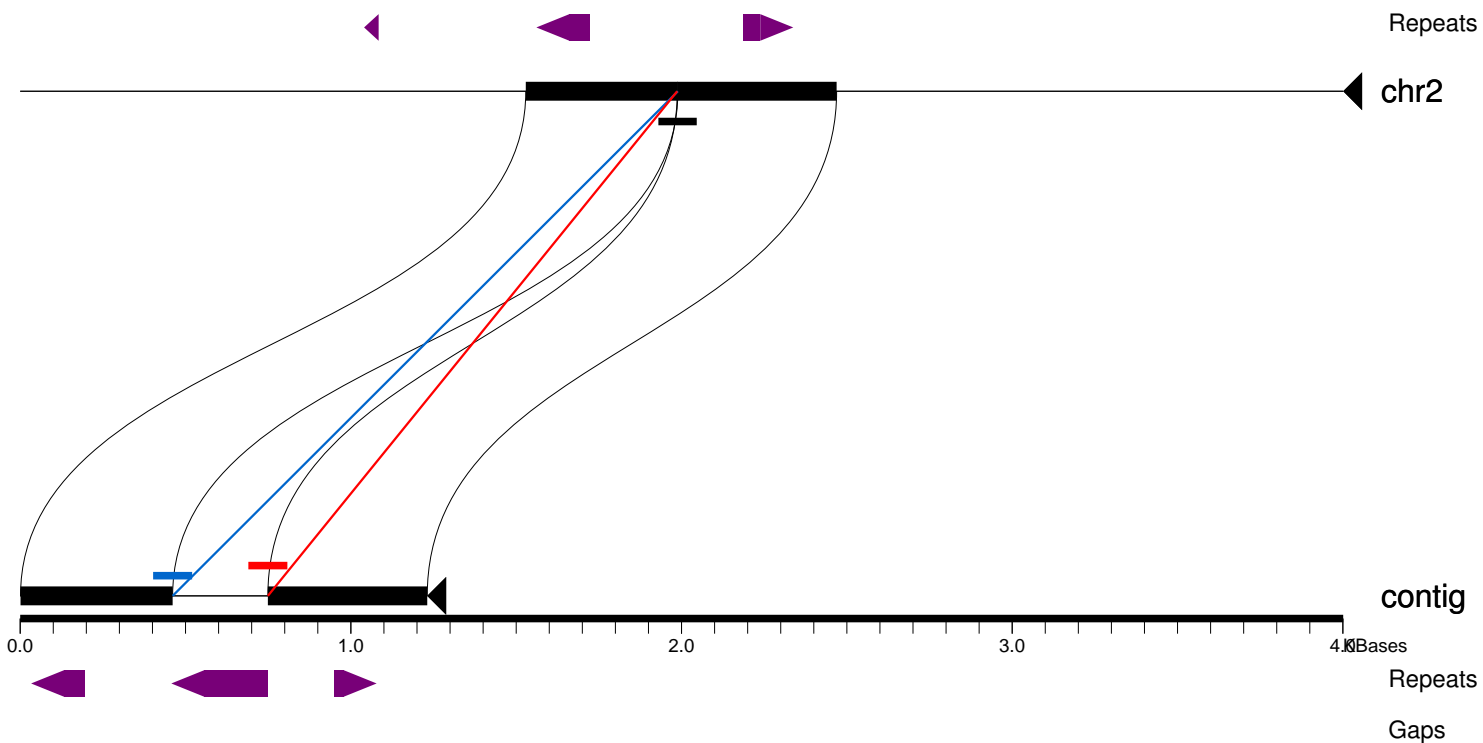

siteID: chr2\_49733496 Scaffoldig11 + Breakpoint: chr2:49733481

chr2:49733462-49733540

Overlap Length: 14 INS size: 319 Genotyped: Yes

```

left  -----ATTGTATGGAAAAAAAAAAT-----TTTAATATTTT
chrom -----ATTGTATGGAAAAAAAAAAT-----TTTAATATTTCT
right CCACCCGCCTCGGCCTCCCAAAGTCTGGGATTACAGGCGTGAGCCACCGCGCCCGGCCTTTAATATTTCT
      111111111111111111111111*11**111***11*1*1111111111111111111111111111**2*
  
```

```

left  TTTFEEEEEEEEEEEEEEEEEEEEEEEEEEEEEEEEEEEEGAGACGGAGTCTCGCTCTGTGCCCCAGGCCGACTG
chrom TTATTTCTTACCACTTTTTTATTTATGTTTTGTATTTTCATG---TCT-----
right TTTATTTCTTACCACTTTTTTATTTATGTTTTGTATTTTCATG---TCT-----
      **2**2**22222*****2***2*2***2*2*222*2*222***222222222222222222222222222
  
```

```

left  CGGACTGCAGTGGCGCAAT
chrom ---AATTTA-----
right ---AATTTA-----
      222*2*22*2222222222
  
```

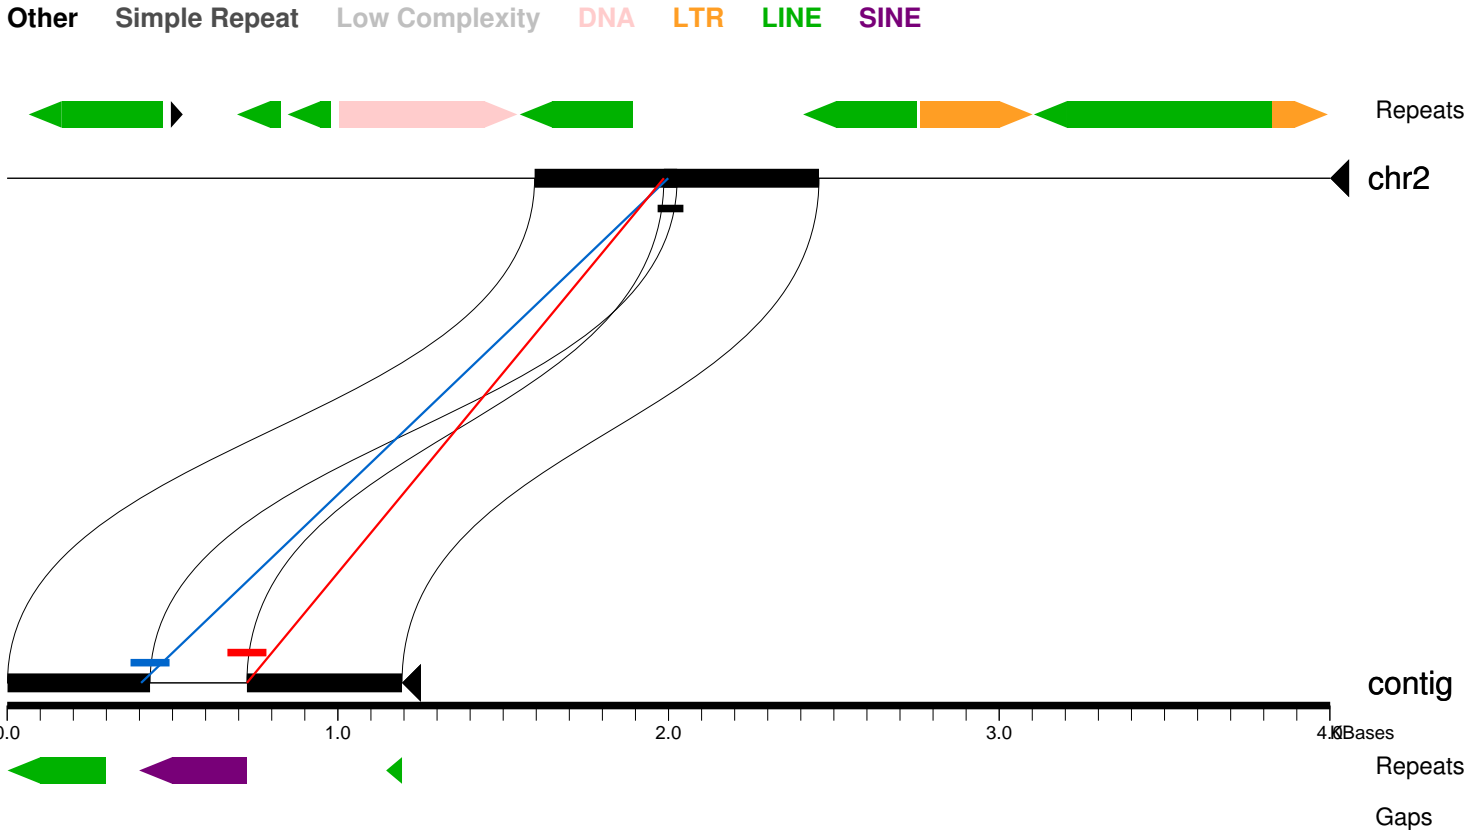

siteID: chr2\_50602625 Scaffitig7 + Breakpoint: chr2:50602630

chr2:50602585-50602689

Overlap Length: 15 INS size: 315 Genotyped: Yes

```
left  AC----AGCTAG-CATGCCT-----CTGAGTTAAAAATTTGAAAGCTA----GTCGTGTTAATTCTGAAGC
chrom AC----GGCTAG-CATGCCT-----CTGAGTTAAAAATTTGAAAGCTA----GTCGTGTTTAAATTCTGAAGC
right CCACCCGCCTCGGCCTCCCAAAGTGCTGGGATTACAGGCGTGAGCCACCGCGCCCGGCCAATTCTGAAGC
      1*111121**1*1*1*1*1**111111***1*1*1*1*111*11***1*1111*1*1*111*****
```

```
left  TCTTTTTTTTTTTTTTTTTTTTTTTTTTTTTTTTTGAGACGGAGTCTCGCTCTGTCGCCCAGGCCGG
chrom TCTTAATCACTAAATTTTATACTACCTCTTTAGGTTGGA---TGGCA-TATCA-----
right TCTTAATCACTAAATTTTATACTACCTCTTTAGGTTGGA---TGGCA-TATCA-----
      ***22*222*222*****2*22*222*2***22*22***222*2**22*2**22222222222
```

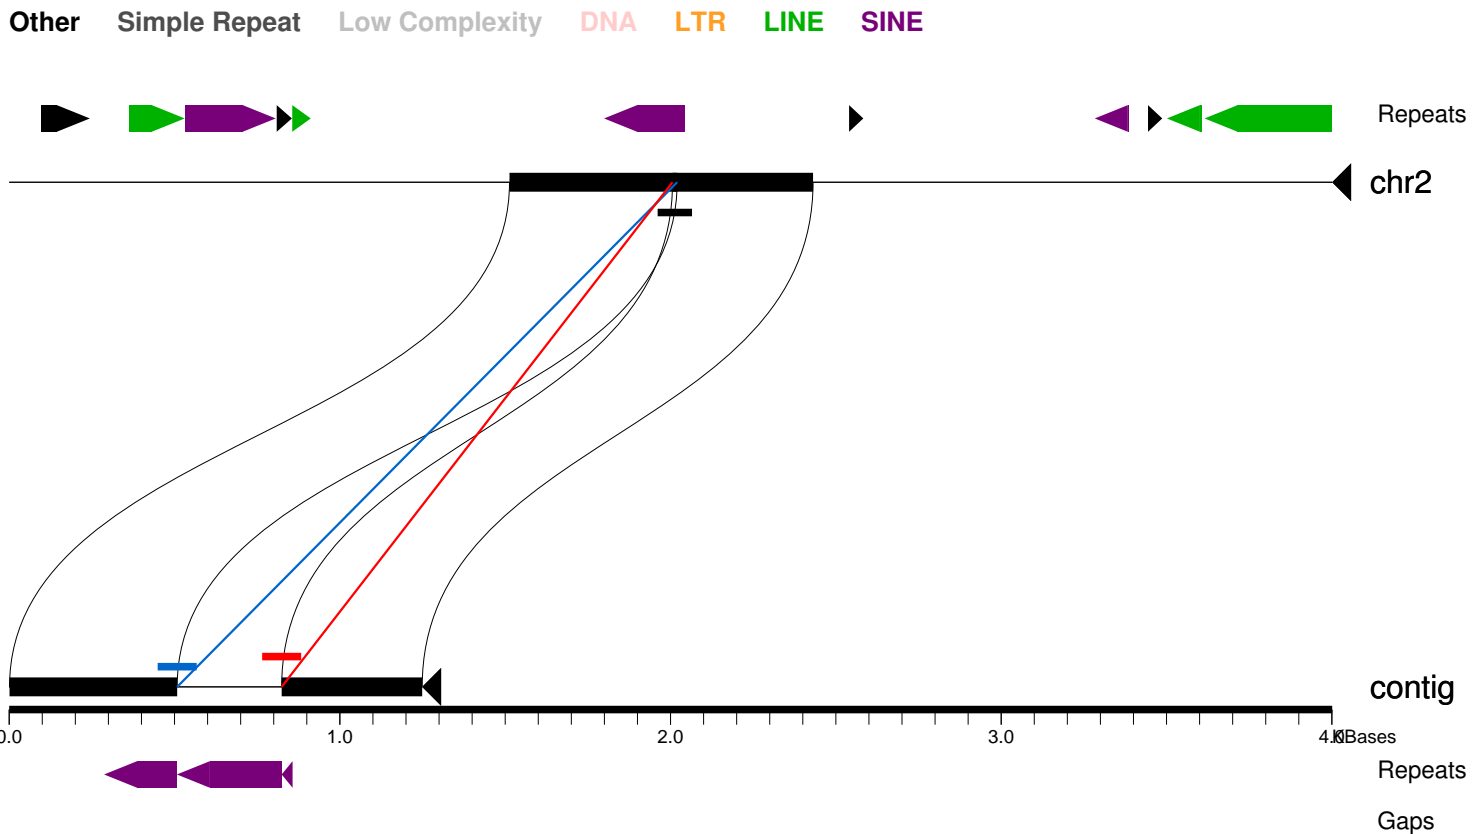

siteID: chr2\_51613500 Scaffitig1 - Breakpoint: chr2:51613470

chr2:51613427-51613529

Overlap Length: 17 INS size: 306 Genotyped: Yes

```
left   TTTTCTCTTG-----ATATTCCAT-----AACTTAAATACCATAATGTTAA-ATTAATAATATAT
chrom  TTTTCTCTTG-----ATATTCCAT-----AACTTAAATACCATAATGTTAA-ATTAATAATATAT
right  CTCCAGCCTGGGCGACAGCGAGACTCCGTCTCAAAAAAAAAAAAAAAAAAATAATAATAATAATAATATAT
      1*1111*1**11111111111*1*1***1*11111**111***1*11*1***11***1*1*****

left   AAACACGGCCGGGCGCGGTGGCTCAC-GCCTGTA-ATCCAGCACTTTGGGAGGCCGAGGCGGGCGG
chrom  AAACACTA-----TGATACAAAGTCAGTATAT-----CTTATGTTACATGATAAGGGAA-
right  AAACACTA-----TGATACAAAGTCAGTATAT-----CTTATGTTACATGATAAGGGAA-
      *****222222222222**222**22*2*2***2**2222222**22*222222**222***222
```

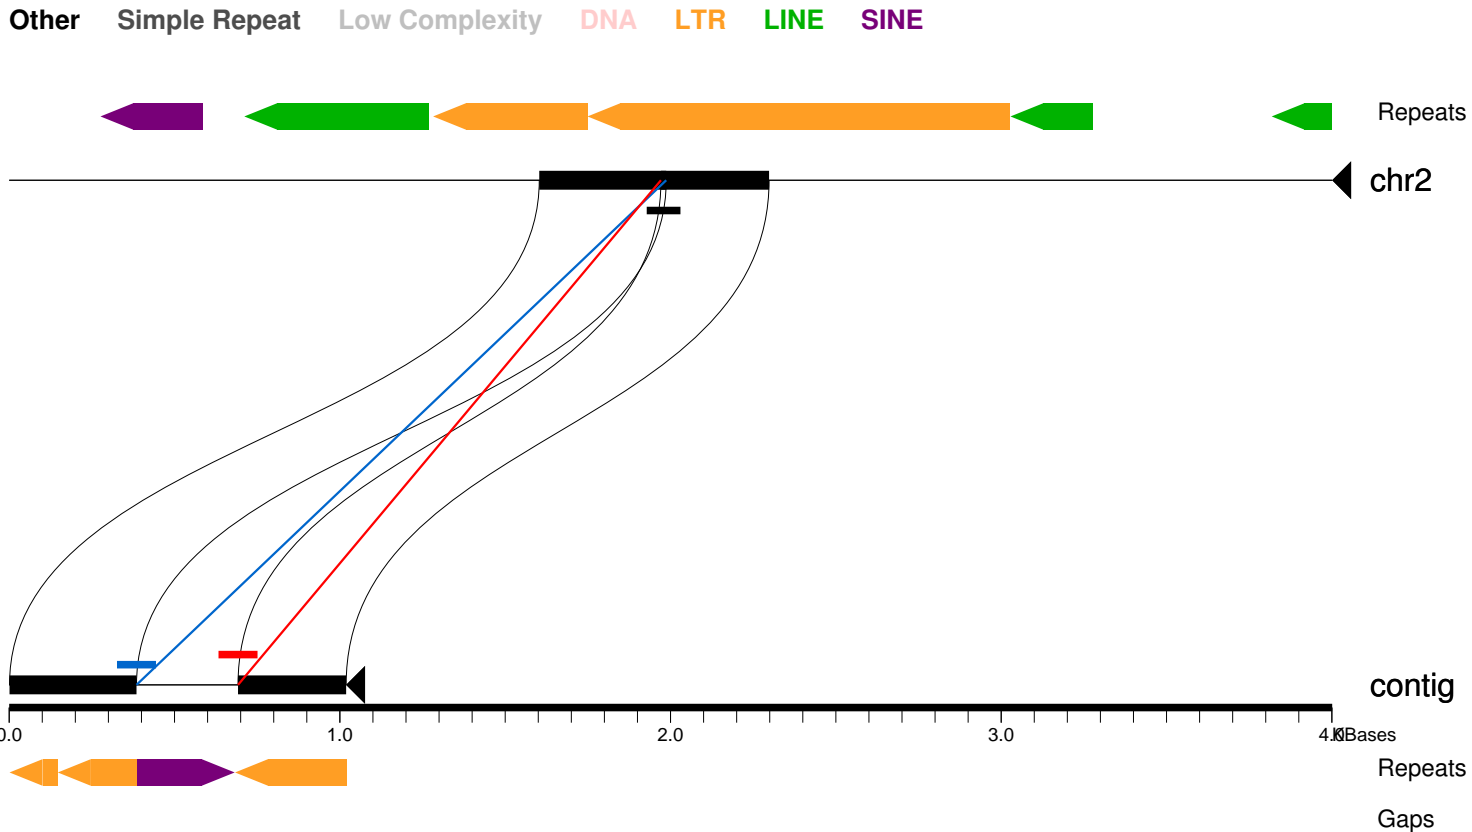

siteID: chr2\_51996012 Scafftig2 + Breakpoint: chr2:51995969

chr2:51995925-51996028

Overlap Length: 10 INS size: 302 Genotyped: Yes

```

left  TA-----CTTAAATATATTTATAAGCAATAATTTTATTTTGTGAATTTT-----GTAAAATTTT
chrom TA-----CTTAAATATATTTATAAGCAATAATTTTATTTTGTGAATTTT-----GTAAAATTTT
right CCGCCCGCCTCGGCCTCCCAAAGTGCTGGGATTACAGGC-GTGAGCCACCGCGCCCGGCCGTAAAATTTT
      11111111*1*111111*1111*1111**1111***11*1111****11111111111111111111******

```

  

```

left  TTTTTTTTTTTTTTTTTTTTTTTTTTTGAGAGGGAGTCTCGCTCTGTCGCCCAGGCTGGAGTGCAGTGGCG
chrom GTATTTAAAATTATTTGACATTCCTAGTATTTGTACAATATCA-----TGGTTTT-----
right GTATTTAAAATTATTTGACATTCCTAGTATTTGTACAATATCA-----TGGTTTT-----
      2*2***2222*2***2222*22222*2*2*2222*22*2**22222222***22*22222222

```

Other Simple Repeat Low Complexity DNA LTR LINE SINE

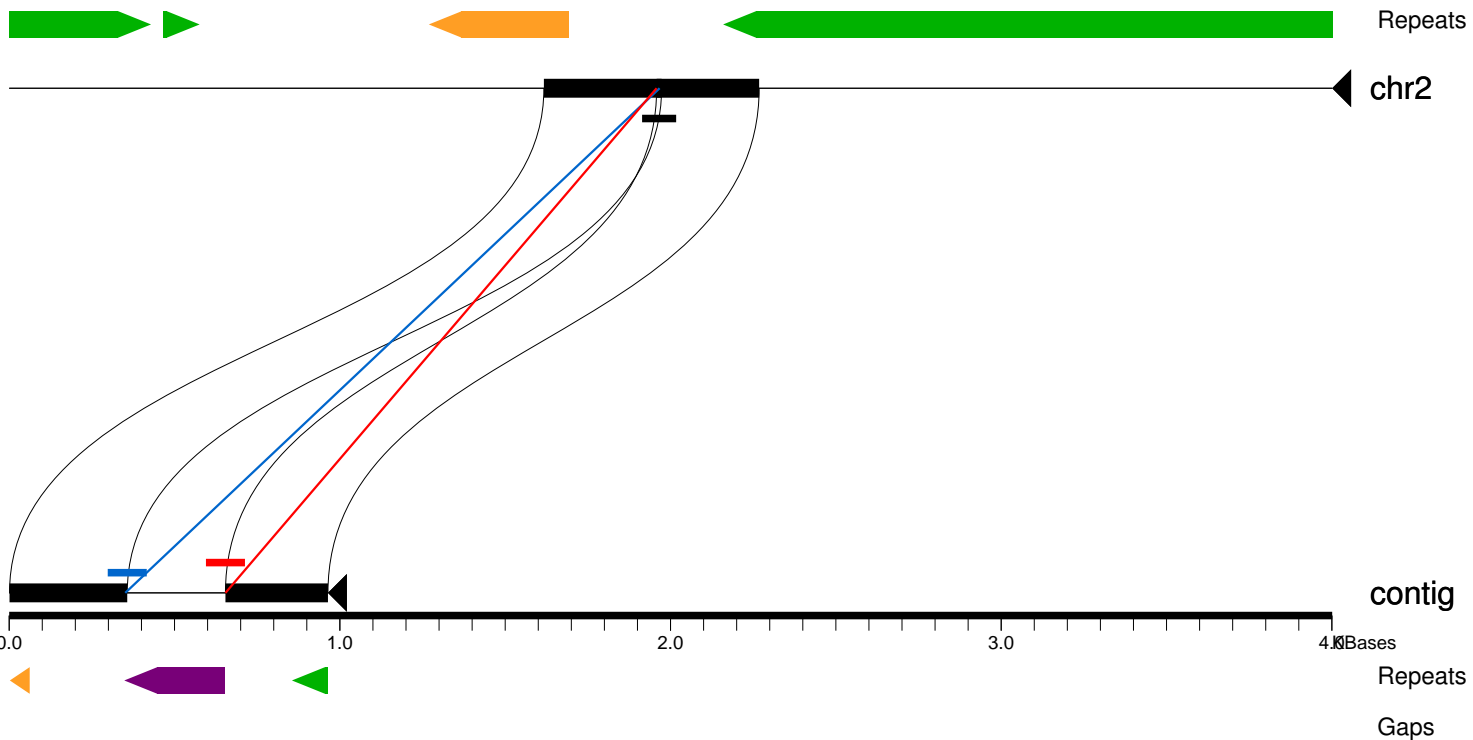

siteID: chr2\_54673595 Scaffitig1 - Breakpoint: chr2:54673580  
 chr2:54673538-54673643  
 Overlap Length: 18 INS size: 326 Genotyped: No

```

left AAC-CCAGT-----AAATTCCTCAAATTAACAGAG-GAACAACTGGAGAAGGCTCTGATTCCCTC
chrom AAC-CCAGT-----AAATTCCTCAAATTAACAGAG-GAACAACTGGAGAAAGGCTCTGATTCCCTC
right TCCGCCCGCCTCGGCCTCCCAAGTGCTGGGATTACAGGCGTGAGCCACCGCGCCCAGC-CTGATTCCCTC
      11*1**1*1111111111111111**1*1**111****111*1*1**1*1**1*11111***1*****
left TCTTNNNNNNNNNNNNNNNNNNNNNNNNNNNNNNNNNNNNNNNNNNNNNNNNNNNNNNNNNNNNNNNN
chrom TCTT-----AAGTATGGCTAAAGATAGTAGGGCCTGCACTCCAATAGCTAAGAGA
right TCTT-----AAGTATGGCTAAAGATAGTAGGGCCTGCACTCCAATAGCTAAGAGA
      ***22222222222222222222222222222222222222222222222222222222222222222222
  
```

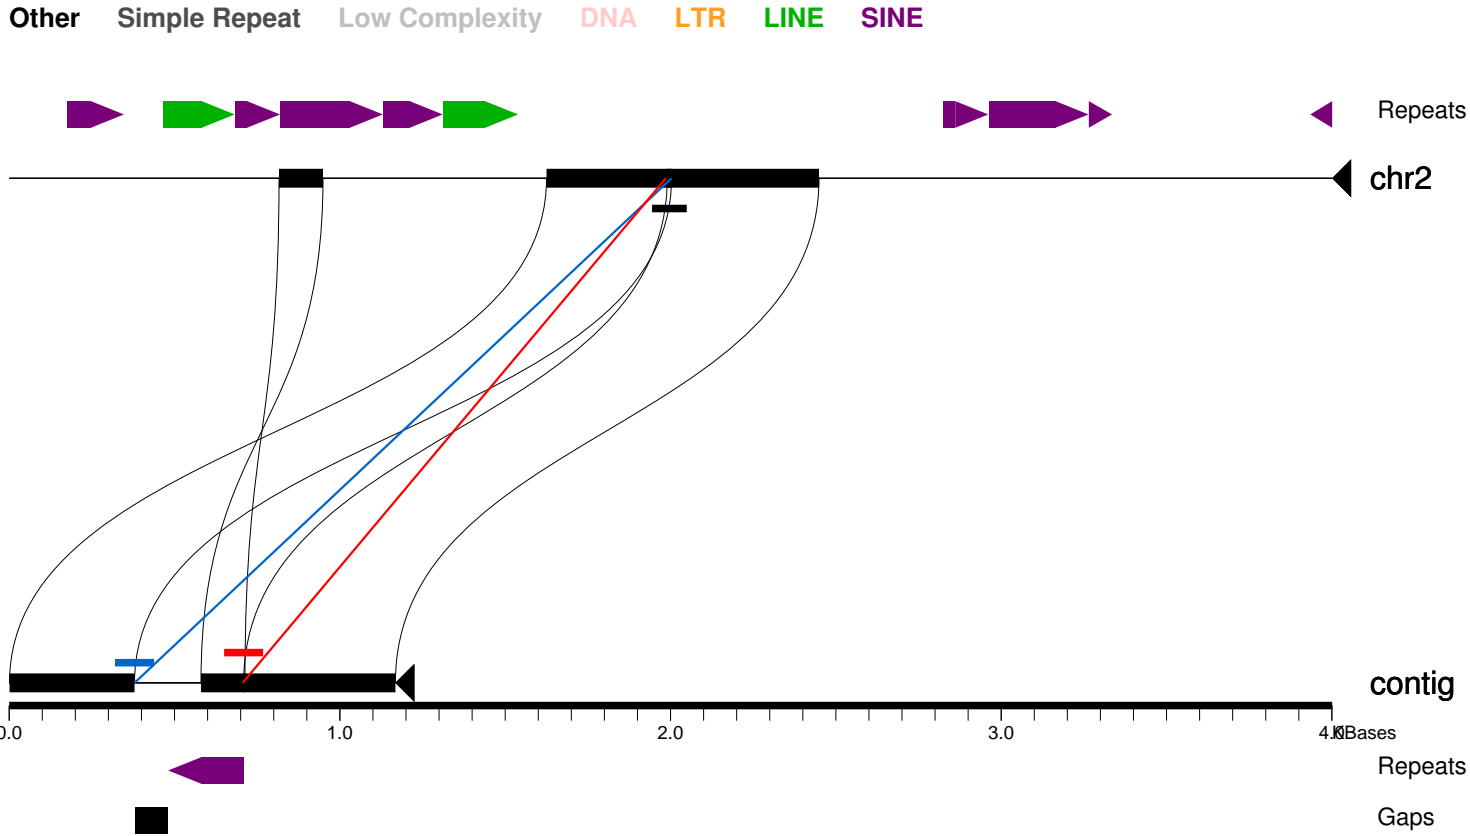





siteID: chr2\_5562911 Scaffitig4 - Breakpoint: chr2:5562896  
 chr2:5562853-5562955  
 Overlap Length: 17 INS size: 312 Genotyped: Yes

```

left  ATTTCTAGC----CCACTTTGGGTAGTTCTTTTCTATTCTCCCATF-----AAAAAATTCTG
chrom ATTTCTAGC----CCACTTTGGGTAGTTCTTTTCTATTCTCCCATF-----AATAAATTCTG
right AGTCCGACCTGGGCGACAGAGCGAGACTCCGTCTCAAAAAAAAAAAAAAAAAAAAAAAAAAAAAAATAAATTCTG
      *1*1*1*1*1111*1**111*1*11*1*1*1*1*1*1*1*1111111*111111111111111111*
left  AGTGGTGGCCGGGCGCGGTGGCTCACGCCTGTAATCCCAGCACTTTGGGAGGCCGAGGCGGGTGG
chrom AGTGGTTAA-----GTGATTTTCTACA-TAAT-----AATCTGGTTTCTATTTACTGGCA-
right AGTGGTTAA-----GTGATTTTCTACA-TAAT-----AATCTGGTTTCTATTTACTGGCA-
      *****2222222222222222***22*22*22*22*****222222*2*2***2222222222*2**222

```

Other Simple Repeat Low Complexity DNA LTR LINE SINE

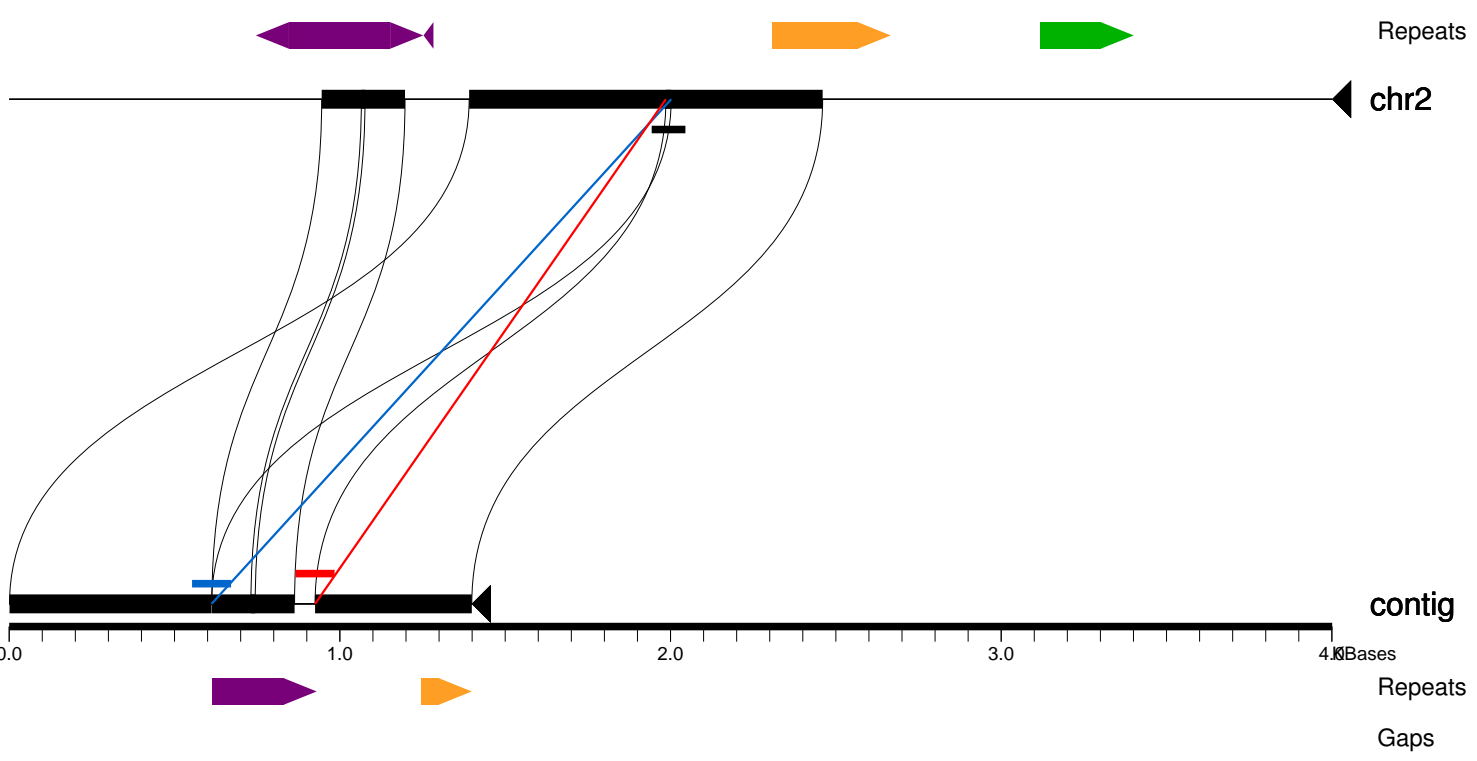





siteID: chr2\_57451073 Scaffitig1 + Breakpoint: chr2:57451043

chr2:57451000-57451102

Overlap Length: 17 INS size: 313 Genotyped: Yes

```
left  TTCTAATATTTATGCCTGAAGAACTCATGTTAGTATT-----CTCTGTCTCAAACCATA
chrom TTCTAATATTTATGCCTGAAGAACTCATGTTAGTATT-----CTCTGTCTCAAACCATA
right TCCACCCGCCTCGGCCTCCCAAAGTGCTGGGATTACAGGCGTGAGCCACCGCGCCCGGCCTCAAACCATA
      *1*11111111*11****1111*1*11*11*1*1*11111111111111111111*1*1*1*****
```

```
left  TTTTTFTTTTTTTTTTTTTTTTTTTTTTTTTTTTTTGAGACGGAGTCTCGCTCTGTTGCCAGGTCGGA
chrom TTTTTFATCATCATCTGTTAGTACAATT-----AC--AATC---CTTTTTTA---ATTTTCAG-
right TTTTTFATCATCATCTGTTAGTACAATT-----AC--AATC---CTTTTTTA---ATTTTCAG-
      *****2*22*22*2*2**22*2222**2222222**22*2**222**2*2**2222*22**2*2
```

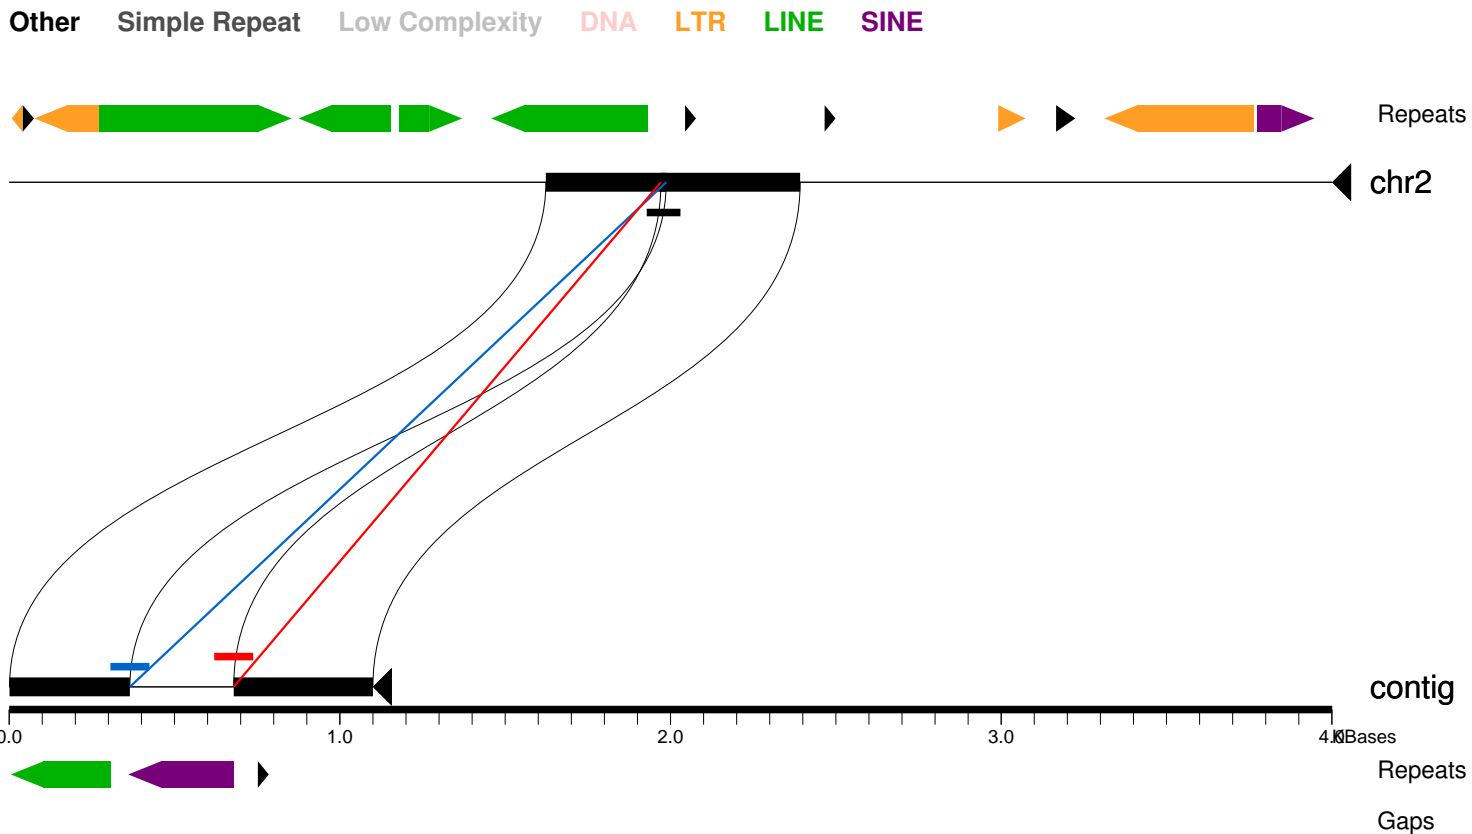

siteID: chr2\_59874274 Scaffitig1 - Breakpoint: chr2:59874259

chr2:59874218-59874315

Overlap Length: 19 INS size: 223 Genotyped: Yes

```
left  C--TTGAGGTGGGAAAAACAGCCGGGATAA-----ACAAGAAGCTGAACAGAAAAAT
chrom C--TTGAGGTGGGAAAAACAGCCGGGATAA-----ACAAGAAGCTGAACAGAAAAAT
right CACTGCAGTCCGCAGTCCGGCTGGGCAACAGAGCGAGACTCCGTCTCAAAAAAAAAAAAAAAGAAAAAT
      *11*11*111*1*111*1***1**11**11111111111111111111111111111111*1**1**1111**1*****
left  AACTACAAGGGAGACCATCCTGGCTAACAAAGGTGAAACCCCGTCTCTACTAAAAATACAAAAAATTAGCC
chrom AACTACAAGGGTAAAA-----AACTAGGAAAAAGAGTTGT-TC-----ATAGGAGACTTTT---
right AACTACAAGGGTAAAA-----AACTAGGAAAAAGAGTTGT-TC-----ATAGGAGACTTTT---
      *****22*222222222222***2***22**22222**2**22222222***22*2*22**2222
```

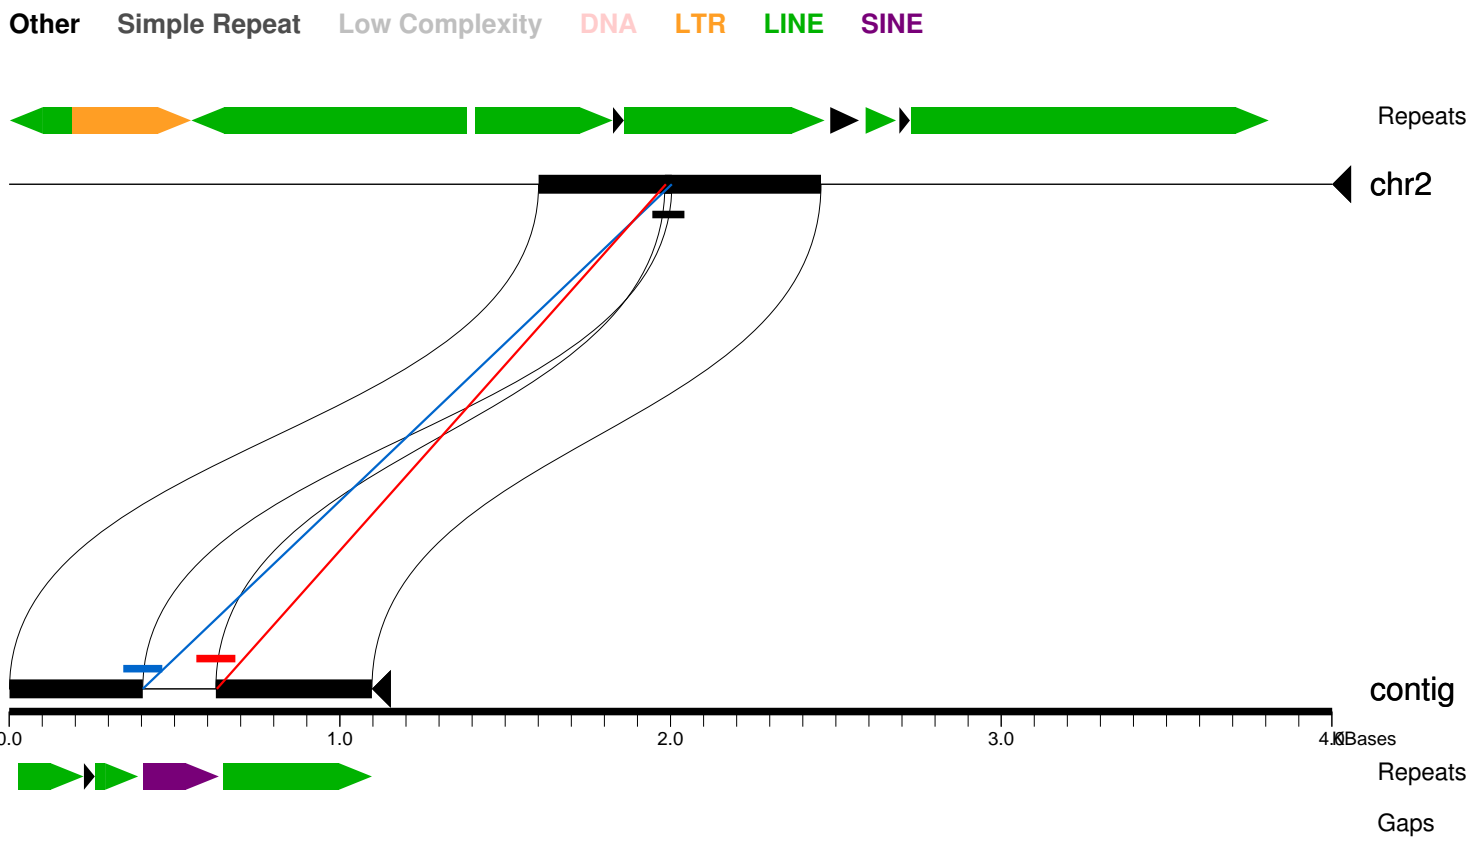

siteID: chr2\_62501812 Scaffitig3 + Breakpoint: chr2:62501899

chr2:62501853-62501958

Overlap Length: 14 INS size: 316 Genotyped: Yes

```
left  CAG----AAACATCCTCACAGAC-----ACACCCAGAGAGAATGTTTTACCAGTTAGCTATACAT
chrom CAG----AAACATCCTCACAGAC-----ACACCCAGAGAGAATGTTTTACCAGTTAGCTATACAT
right CCGCCCGCCTCGGCCTCCCAAAGTGCTGGGATTACAGGC-GTGAGCCACCGCGCCCGGCCAGCTATACAT
      *1*11111111*11****1**1*111111111111***11*1*1***1111111111*1*11*****
```

```
left  TCTTTTTTTTTTTTTTTTTTTTTTTTTTTTTTTTTTTTTTTTTTTTTTTTTTTTTGAGACGGAGTCTCGCT
chrom TCTTAAGCCAGTCAAACCTGAGACATAAAAATTAACCATC-----ACAGAATGT--AT
right TCTTAAGCCAGTCAAACCTGAGACATAAAAATTAACCATC-----ACAGAATGT--AT
      ***22222222*22222*222222*2222**22222*222222222222**2**2*2*222*
```

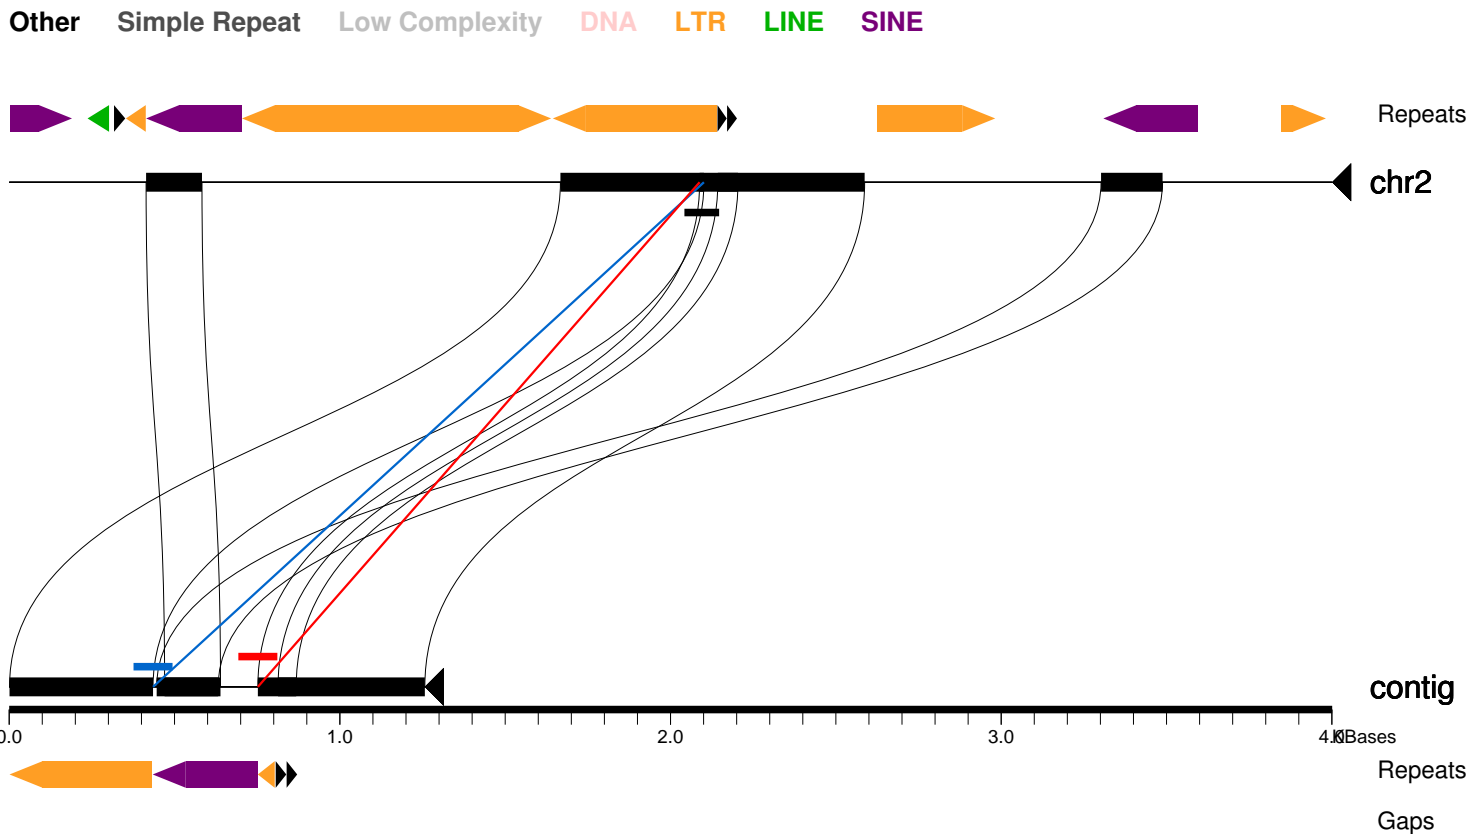





**siteID: chr2\_63965535 Scaffoldig1 - Breakpoint: chr2:63965513**  
**chr2:63965468-63965572**  
**Overlap Length: 15 INS size: 338 Genotyped: No**

```

left   -----CTCA-----CAACAGAATGTTTCAGCAAATACT-CAGGTTCTTATTTTTTTTATCAGGGCTAC
chrom  -----CTCA-----CAACAGAATGTTTCAGCAAATACT-CAGGTTCTTATTTTTTTTATCAGGGCTAC
right  ACGCCATTCTCCTGCCTCAGCCTCCTGTGTAGCTGGGACTACAGGCACGCGCCACCATGATCAGGGCTAC
       111111111***11111111**1*11111***11***1111***1****11*1111111111*1*****
left   TATTTTTTTTTNNNNNNNNNNNNNNNNNNNNNNNNNNNNNNNNNNNNNNNNNNNNNNNNNNNNNNNNNNNN
chrom  TATTGACATTTGCTTGTTTCAGGGGACCACCCCCACTCCTTCTCCTGTGC-----
right  TATTGACATTTGCTTGTTTCAGGGGACCACCCCCACTCCTTCTCCTGTGC-----
       ***2222**22222222222222222222222222222222222222222222222222222222222222

```

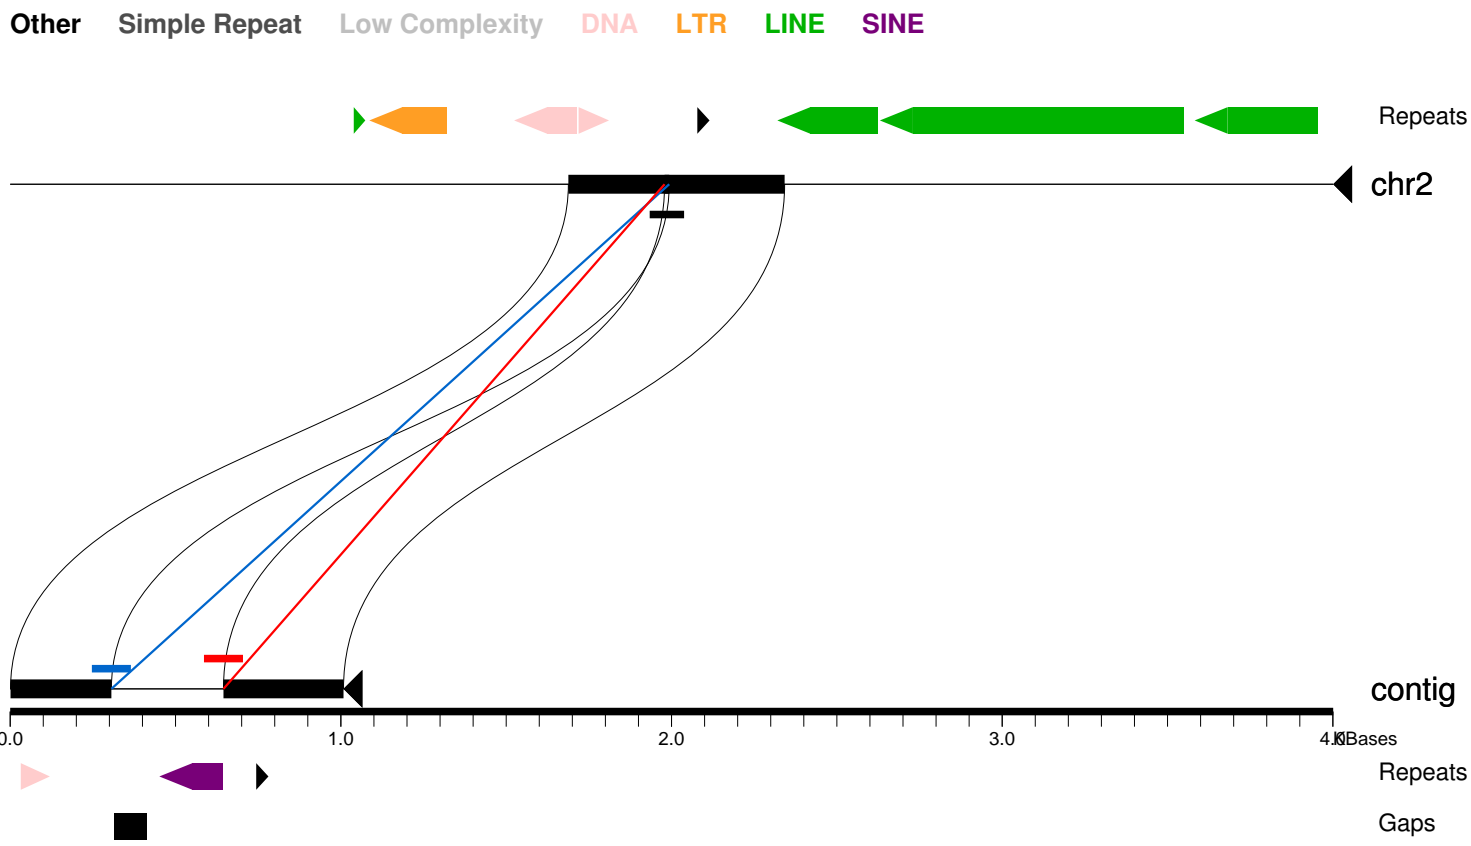

siteID: chr2\_64771802 Scaffitg5 - Breakpoint: chr2:64771785

chr2:64771741-64771844

Overlap Length: 16 INS size: 304 Genotyped: Yes

```
left  A-----ACAGCT-----ATTTAAAGCCCATATTTTATGTGTAAAGTGGATTATAGAAATGAAAC
chrom A-----ACAGCT-----ATTTAAAGCCCATATTTTATGTGTAAAGTGGATTATAGAAATGAAAC
right TGCACTCCAGCCTGGGCGACAGAGCGAGACTCCGTCTCAAAAAAAAAAAAAAAAAAAAAAAAAAAGAAATGAAAC
      11111111****111111111111*111*1*11**1*1*111*111111****1111*11*1*****

left  TTTATGGGCGGGCGCGGTGGCTCACGCCTGTAATCCCAGCACTTTGGGAGGCCGAGGCGGGCG
chrom TTTATTTGTAAA-----TTCATTATACAAGTAATACTT-CAATT-----AACATGAAACT-----
right TTTATTTGTAAA-----TTCATTATACAAGTAATACTT-CAATT-----AACATGAAACT-----
      *****22*2222222222*222*2*22*22*****2*222**2**2222*2222**22*22222
```

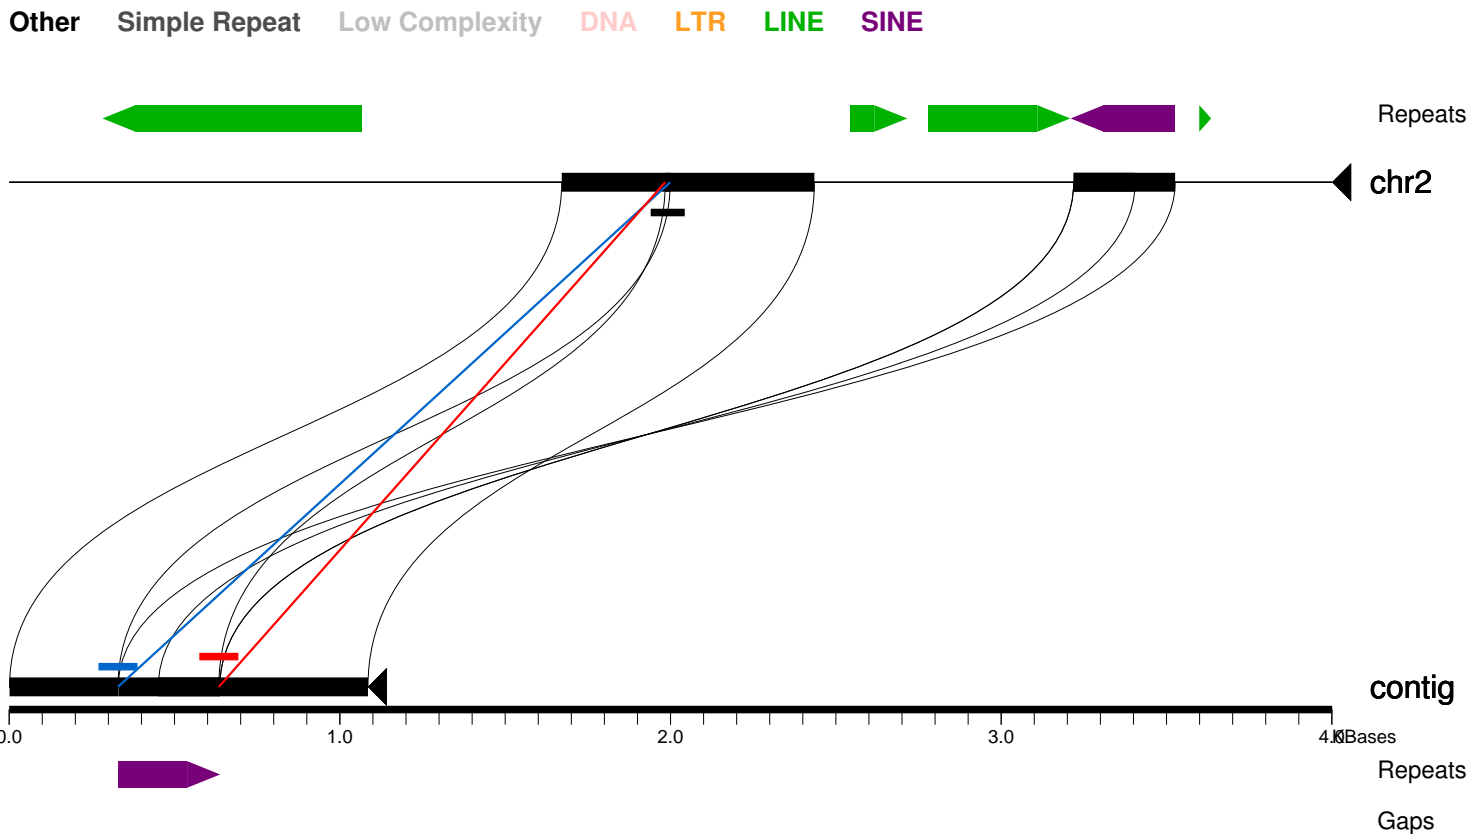

siteID: chr2\_65163760 Scaffitig5 - Breakpoint: chr2:65163768

chr2:65163724-65163827

Overlap Length: 16 INS size: 424 Genotyped: No

```
left      G-----GTAATGAAAATGTTCTGGAATTCATGGTGATAGTTACAGAACT-----CCATGGATATA
chrom     G-----GTAATGAAAATGTTCTGGAATTCATGGTGATAGTTACAGAACT-----CCATGGATATA
right     CCACCCGCCTCGGCCTCCCAAAGTGCTGGGATTACAGGCGTGAGCCACCGCGCCCGGCCCCATGGATATA
          111111111111*111*111**1**1****1***111**1*11**11**1*11*1111111*****
```

```
left      CTTTTTTTTTNNNNNNNNNNNNNNNNNNNNNNNNNNNNNNNNNNNNNNNNNNNNNNNNNNNNNNNNNNNN
chrom     CTTT-----AAAAACCCCTCTGATTTCGTACATTTTTTAAAAAGATGGTTTTTATGG
right     CTTT-----AAAAACCCCTCTGATTTCGTACATTTTTTAAAAAGATGGTTTTTATGG
          ***2222222222222222222222222222222222222222222222222222222222222222
```

Other Simple Repeat Low Complexity DNA LTR LINE SINE

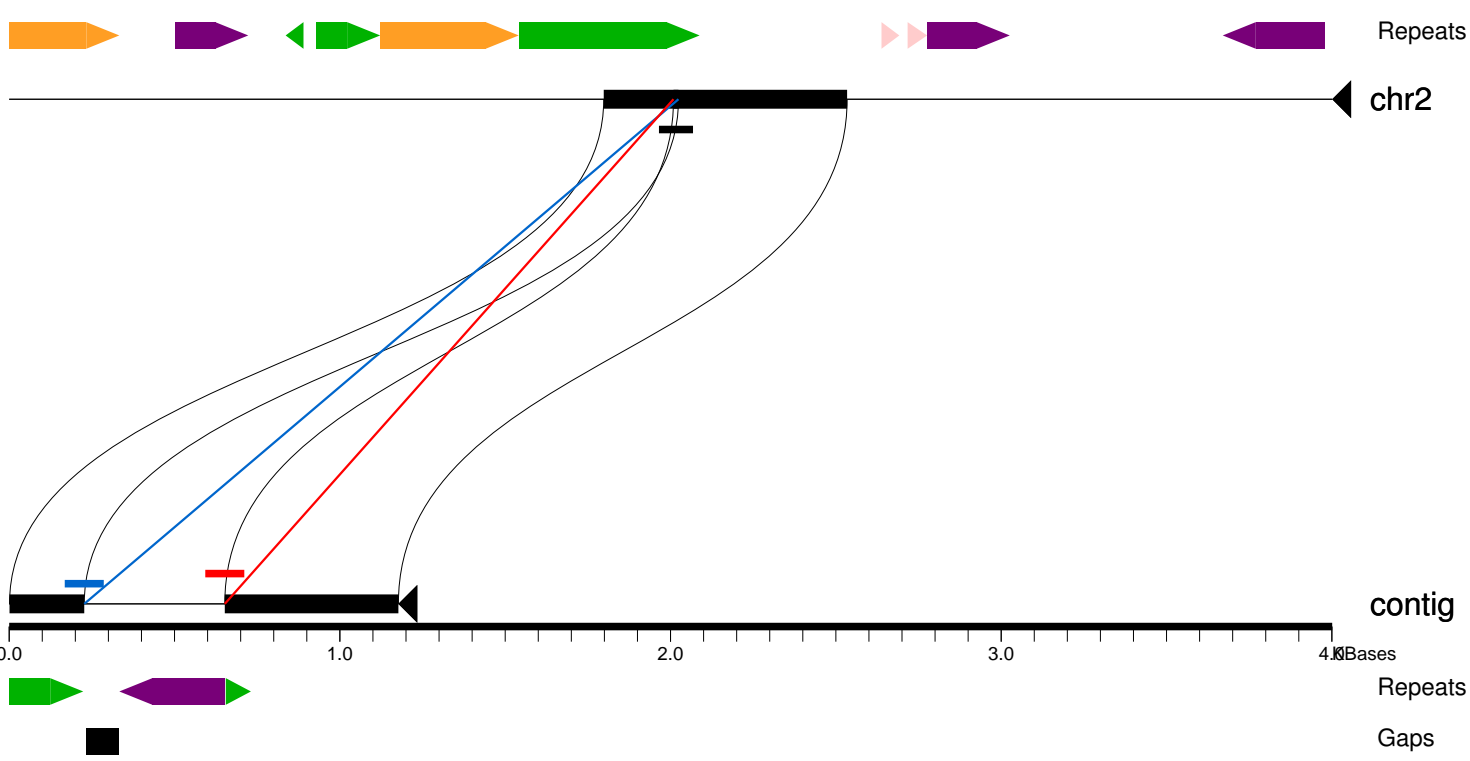

siteID: chr2\_6517416 Scaffoldig1 - Breakpoint: chr2:6517419

chr2:6517347-6517478

Overlap Length: 15 INS size: 299 Genotyped: Yes

```
left  CTTTATGATTAAAAAGCCTCAGCAAAATTTGGCATAACAAGGAACATACCTCAATGTAGTAAAAAGCCATCCAT
chrom CTTTATGATTAAAAAGCCTCAGCAAAATTTGGCATAACAAGGAACATACCTCAATGTAG-AAAAAGCCATCCAT
right CACTGCACTCCA--GCCTGGGCGACAGAGCGAGACTCCGT-----CTCAAAAAAAAA-AAAAAAAAA-----
      *11*11111*11*11****11**1*1*11*11*1**111*1111111*****111*12****111*11111
```

```
left  GATAAATACACAGCCAAC-----GGCC-GGGCGCGGTG---GC--TCACGCCTGTAATCC
chrom GATAAATACACAGCCAACACAATACTGACCAGGGAAAAGTTGAAAAGCATTCCTCTGAGAACTG
right -AAAAAACACAGCCAACACAATACTGACCAGGGAAAAGTTGAAAAGCATTCCTCTGAGAACTG
      1*1**1*****2222222*2**2***222*2**222**22**2*2*2222**222
```

Other Simple Repeat Low Complexity DNA LTR LINE SINE

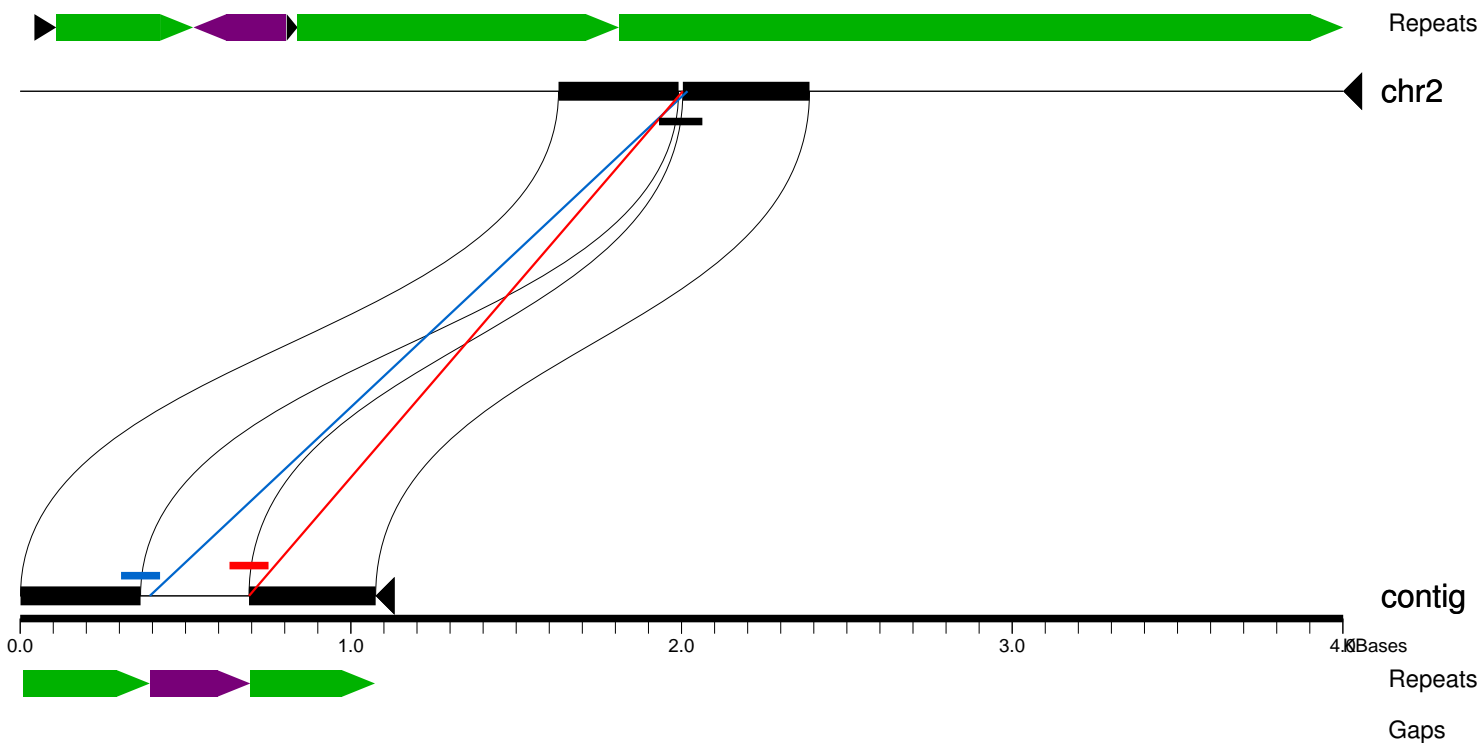



siteID: chr2\_66658986 Scaffitig3 - Breakpoint: chr2:66658979

chr2:66658932-66659098

Overlap Length: 13 INS size: 294 Genotyped: Yes

```
left  -----GTTTGCAAAGGGTG----ACTTACCT-----GAACCTTCTTTTCTCATCTGT
chrom -----GTTTGCAAAGGGTG----ACTTACCT-----GAACCTTCTTTTCTCATCTGT
right CCTGCAGTGAGCCGAGATTGCGCCACTGCCTCCAGCCTGGGCGACAGCGAGACTCCGTCTCAAAAAAAAA
111111**11**11**11**1111***111**1111111111111111**11**1*1*1**11*11111
```

```
left  GCTA--GAAAACAAAAGAAGG-----CCGG---GCGCGGTGGC----TCACGCCTGT-----AAT----
chrom GCTA--GAAAACAAAAGAAGG-----CCGG---GCGCGGTGGC----TCACGCCTGT-----AAT----
right AAAAAAGAAAACAAAAGAAGG-----CCGG---GCGCGGTGGC----TCACGCCTGT-----AAT----
111*11*****22222222***222*22222222*2222*2*22*****222222***2222
```

```
left  -----CCCAGC-----ACTTTGGGA----GGCCGAGGCGGGCGG
chrom ATATATATATATATACTGACCTTTTCCAAATTTGAAAACGTGGCCGCAGAGTTGTG
right ATATATATATATA--CTGACCTTTTCCAAATTTGAAAACGTGGCCGCAGAGTTGTG
22222222222222 *22*2*2222222*2****22*2222*****22*2*2222*
```

Other Simple Repeat Low Complexity DNA LTR LINE SINE

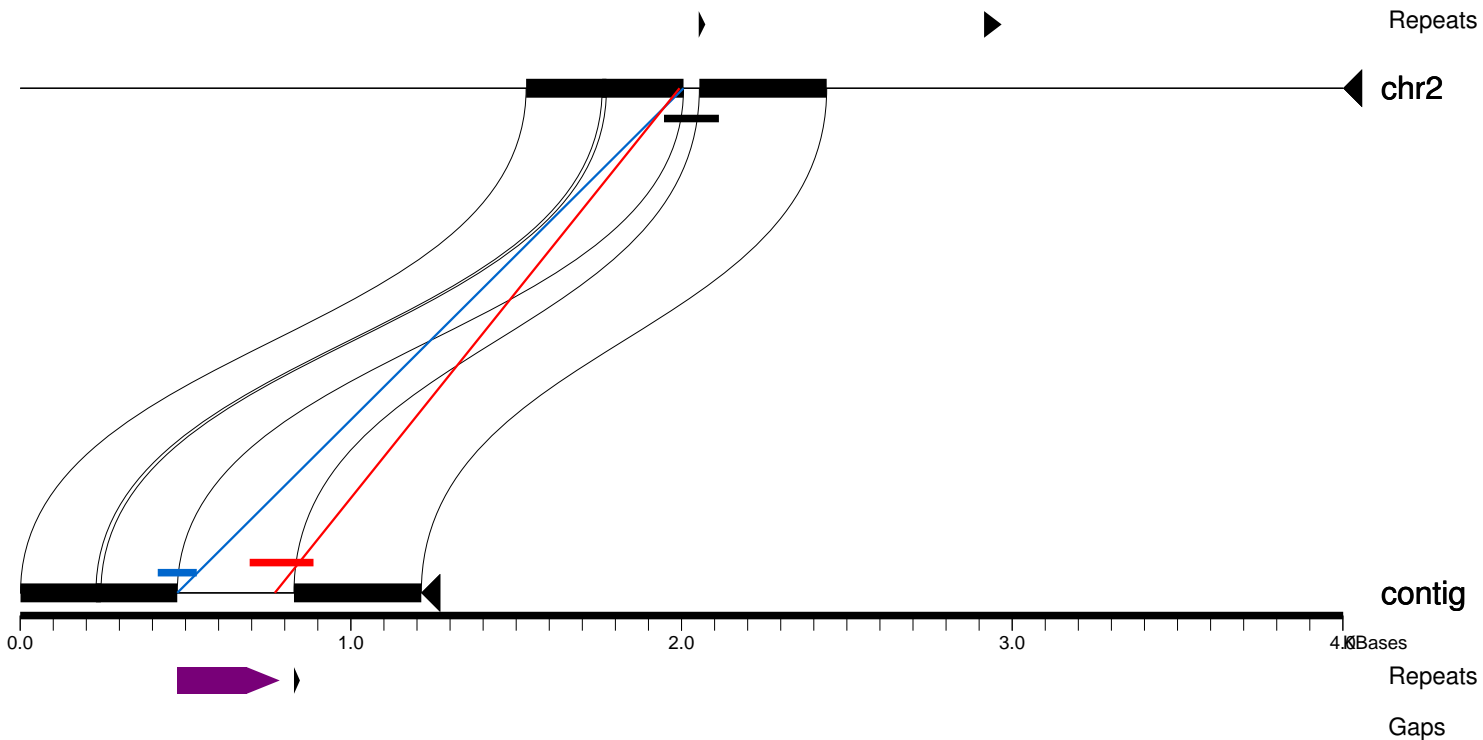

siteID: chr2\_68648213 Scaffoldig1 - Breakpoint: chr2:68648209

chr2:68648163-68648268

Overlap Length: 14 INS size: 430 Genotyped: No

```

left  CAATAGG----GGAAT---AATGCACATTTGAAGATACTAGGGAT-----GGCAGCATCTAACCTCTA
chrom CAATAGG----GGAAT---AATGCACATTTGAAGATACTAGGGAT-----GGCAGCATCTAACCTCTA
right CCACCCGCTCGGCCTCCCAAAGTGC-TGGGATTACAGGCGTGAGCCACCGCGCCCGGCCCTAACCTCTA
      *1*111*1111**11*111**1*11*1*11**11*1*111*1**11111111*1*1*111*****
  
```

```

left  TCTTTTFTTTTNNNNNNNNNNNNNNNNNNNNNNNNNNNNNNNNNNNNNNNNNNNNNNNNNNNNNNNNNNNN
chrom TCTTGCTGCTTAAGGAATTTAGTATAAACAGTCACTTTTGCAGTCTTCTG-----
right TCTTGCTGCTTAAGGAATTTAGTATAAACAGTCACTTTTGCAGTCTTCTG-----
      ***22*22**2222222222222222222222222222222222222222222222222222222222
  
```

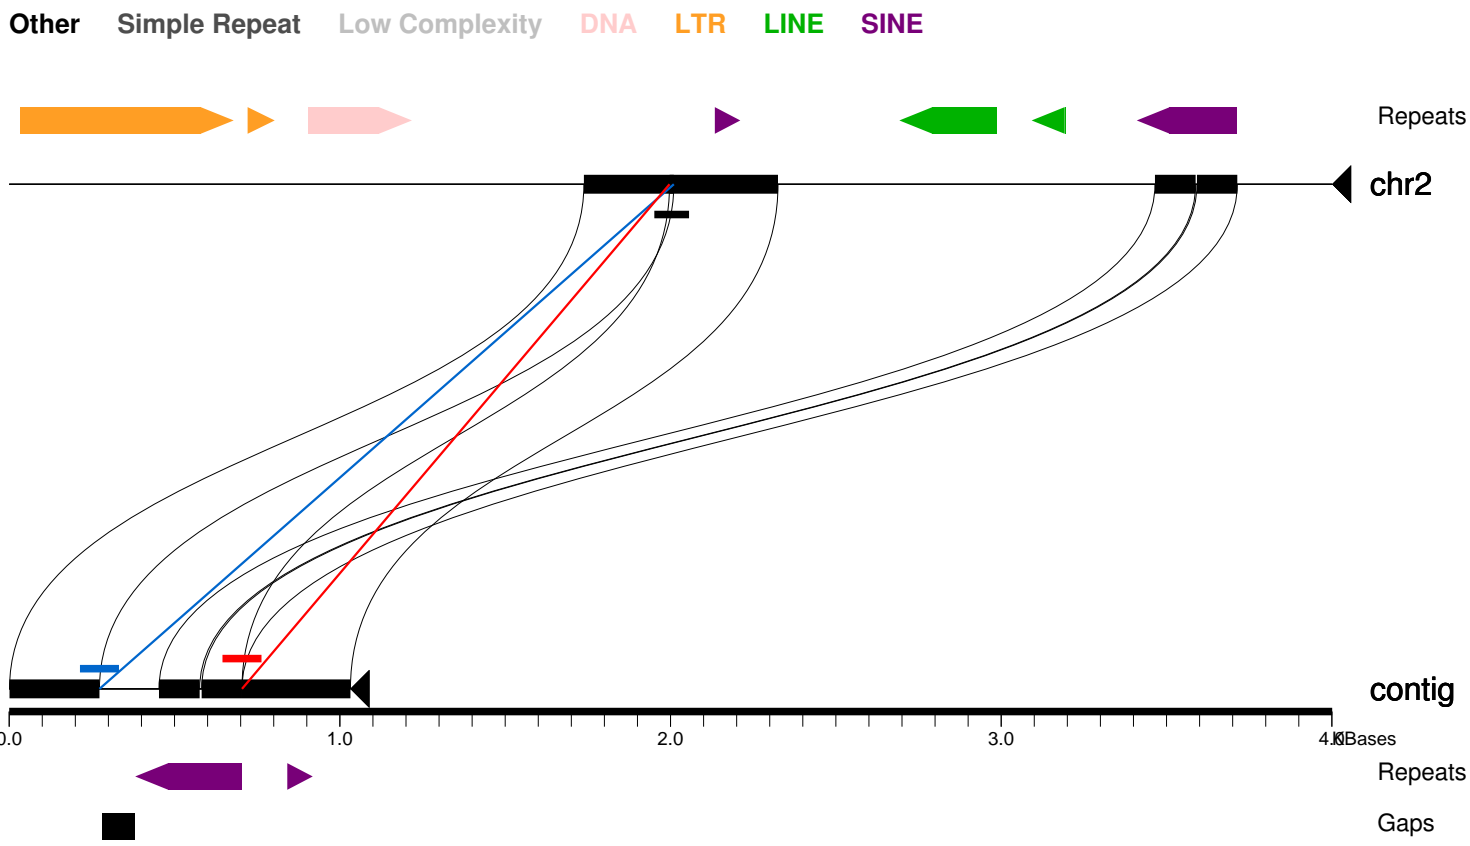

siteID: chr2\_70797708 Scaffitig3 + Breakpoint: chr2:70797703

chr2:70797659-70797759

Overlap Length: 11 INS size: 316 Genotyped: Yes

```
left  TGA-----GGCAACCCTACTCAC-----CAGCTATGCTCCCAATCAAAAATGCC---TCCTTCTA
chrom TGA-----GGCAACCCTACTCAC-----CAGCTATGCTCCCAATCAAAAATGCC---TCCTTCTA
right CGCCCGCCTCGGCCTCCCAAAGTGCTGGGATTACAGGCGTGAGCCACCGCGCCCGGCCCTTCCTTCTA
      1*111111111***11***1*1111*111111111***111*11*1111*11111***111*****
```

```
left  ATTTTTTTTTTTTTTTTTTTTTTTTTTTTTTTTTTTTGGAGACGGAGTCTCGCTCTGTGCGCCAGGCTGGAG
chrom ATTTCTATTAGAATTATTCCCACACTTACT-----GCATTCTCATATTCTCA-----GAA
right ATTCTATTAGAATTATTCCCACACTTACT-----GCATTCTCATATTCTCA-----GAA
      **2*2**2222**2**2222222**22*222222222*2*2***2222*2**222222222**2
```

Other Simple Repeat Low Complexity DNA LTR LINE SINE

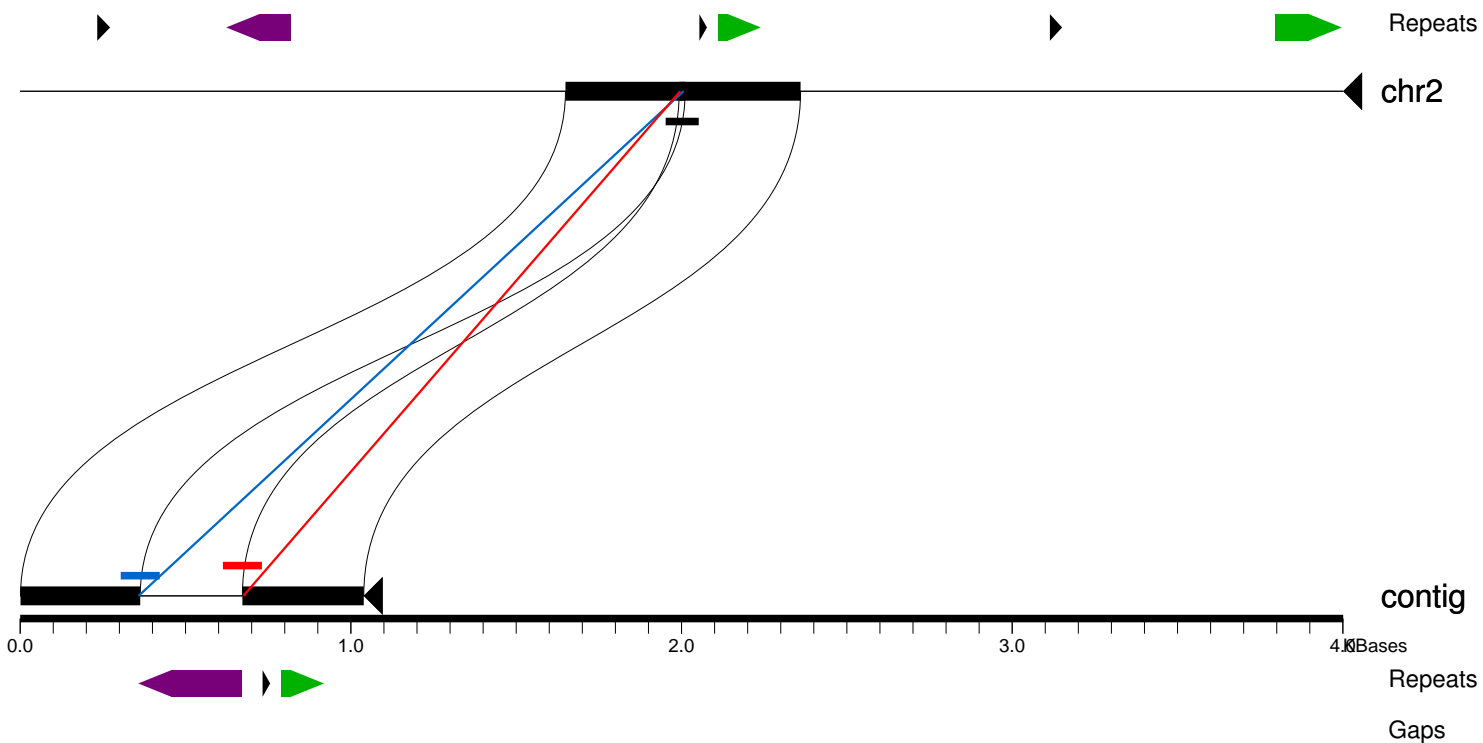



siteID: chr2\_71706281 Scaffold1 + Breakpoint: chr2:71706287

chr2:71706127-71706463

Overlap Length: 17 INS size: 288 Genotyped: No

left NNNNNNNNNNNNNNNNNNNNNNNNNNGG-----CCAGAGGCTCGAGGGACTTTCGTGGTCCAG  
chrom GCTTGGCTCTAAAGCCTACTGGGGCTCCTGGGAGATGTGGCCAGAGGCTCGAGGGACTTTCGTGGTCCAG  
right NNNNNNNNNNNNAA-----  
NNNNNNNNNN22NNNNNNNN11 11111111111111111111111111111111

left GCAGGACTCTCTGAAAGCTGAGCCATCCAGGTGGAGACCAAAGGCTTTCCTACTGAGTCTTGACAGGTTG  
chrom GCAGGACTCTCTGAAAGCTGAGCCATCCAGGTGGAGACCAAAGGCTTTCCTACTGAGTCTTGACAGGTTG  
right -----  
111111111111111111111111111111111111111111111111111111111111111111111111

left GGTGGAATGAGGTGATCTTTAAGAGCCAACCCAAATAACGTG----GTAGCGGC-----G  
chrom GGTGGAATGAGGTGATCTTTAAGAGCCAACCCAAATAACGTG----GTAGCGGC-----G  
right -----  
111111111111111111111111111111111111111111111111111111111111111111111111  
\*\*\*\*\*N\*\*\*\*\*222\*2222\*\*22\*2\*\*\*2222222222222222\*

left CCTGTAGT----CCCAGC-----TACTCGGGAGGCTGAGGCAGGAGAATGGCGTGAACCCGGGAGG--CGG  
chrom TCTGTTGAGCGCCCCATCGTTTCTTTCTTCTGATGCTTA--CTGGA-AGTGCCAGGGCACTGCAGAACAA  
right TCTGTTGAGCGCCCCATCGTTTCTTTCTTCTGATGCTTA--CTGGA-AGTGCCAGGGCACTGCAGAACAA  
2\*\*\*2\*22222\*\*\*2\*22222\*22\*\*22\*\*2\*\*\*2\*22\*2\*\*\*2\*2\*\*2\*22\*22\*2\*2\*\*22\*2N

left AGCTTGCAGTGA--GCCGAGATCGCGCCACTGCA--CTCCAGC-----CTG-GGCGA  
chrom AGCTT-CATTAAATGCCTTCTCTTCTTCTTGGGACCTTCAACACTCTTTTTTCTGTGGATC  
right -----  
11111211N1N1 111NNNNNN1NN1NN1NN 11N11N1 111 11NNN

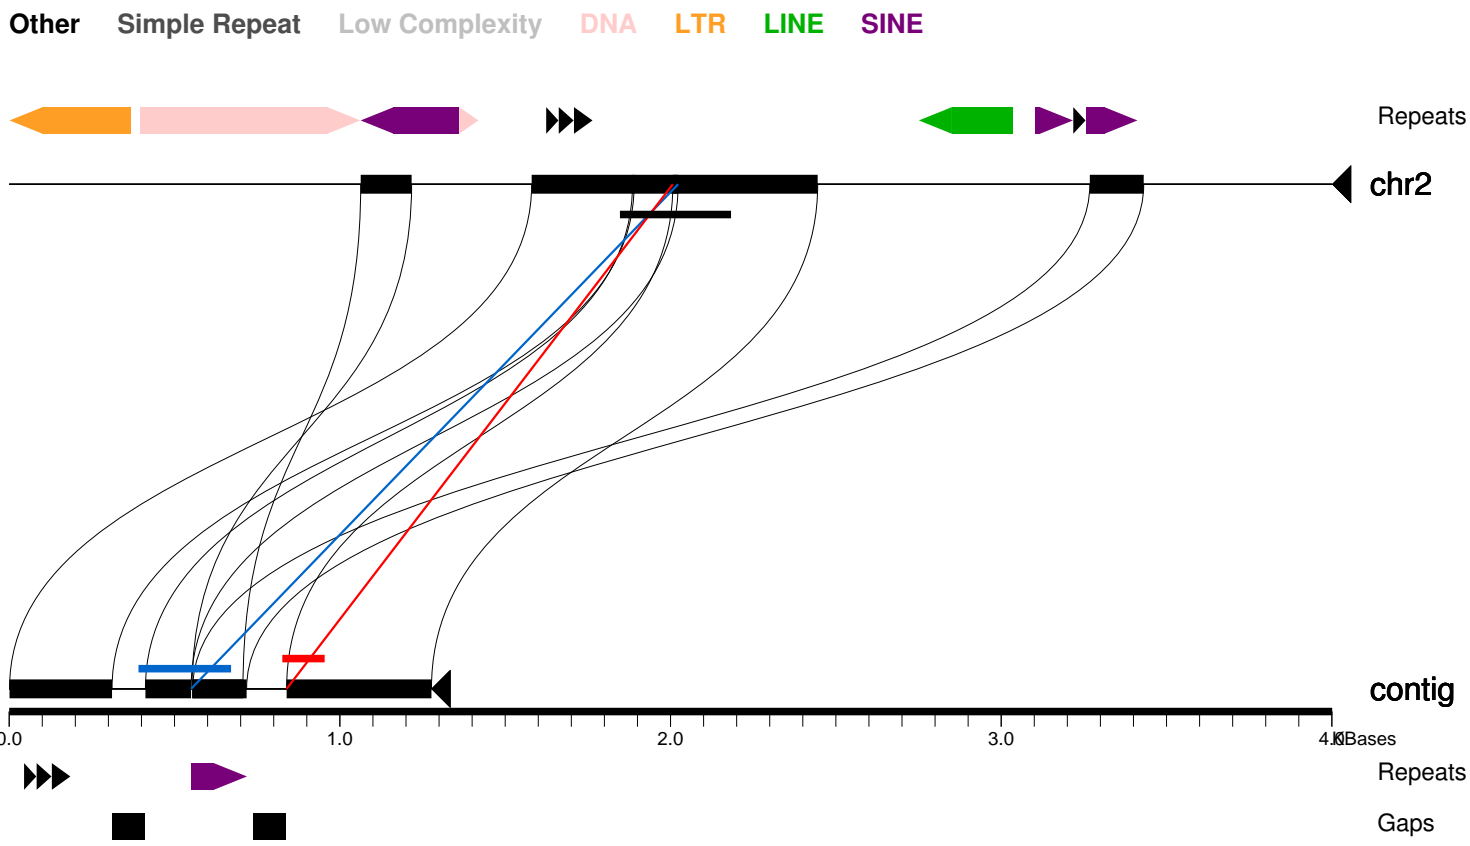

siteID: chr2\_75335276 Scaffold3 + Breakpoint: chr2:75335285

chr2:75335240-75335344

Overlap Length: 15 INS size: 305 Genotyped: Yes

```
left  TTTTATGGGTAAGT-TCC---TTTGCT--AATTCCAAT-----GCTATTTTG---GAAAACAAAGACATT
chrom TTTTATGGGTAAGT-TCC---TTTGCT--AATTCCAAT-----GCTATTTTG---GAAAACAAAGACAGT
right CCGCCCGCCTCGGCCTCCCAAAGTGCTGGGATTACAGGCGTGAGCCACCGCGCCCGGCCACAAAGACAGT
      111111*11*11*11***11111****111***1**1111111**1*1111*111*111*****2*
```

```
left  TTTTTTTTTTTTTTTTTTTTTTTTTTTTTTTGGAGACGGAGTCTCGCTCCGTCGCCCAGGCTGGAGTG
chrom TTTTAAAAGCATCCCTAGCC-----TTGATACCAA-----AATCTGACA--AAGACAGCAC--
right TTTTAAAAGCATCCCTAGCC-----TTGATACCAA-----AATCTGACA--AAGACAGCAC--
      ***2222222*222*222222222****2**22*2222222**2*2*2222**2*2*2*222
```

Other Simple Repeat Low Complexity DNA LTR LINE SINE

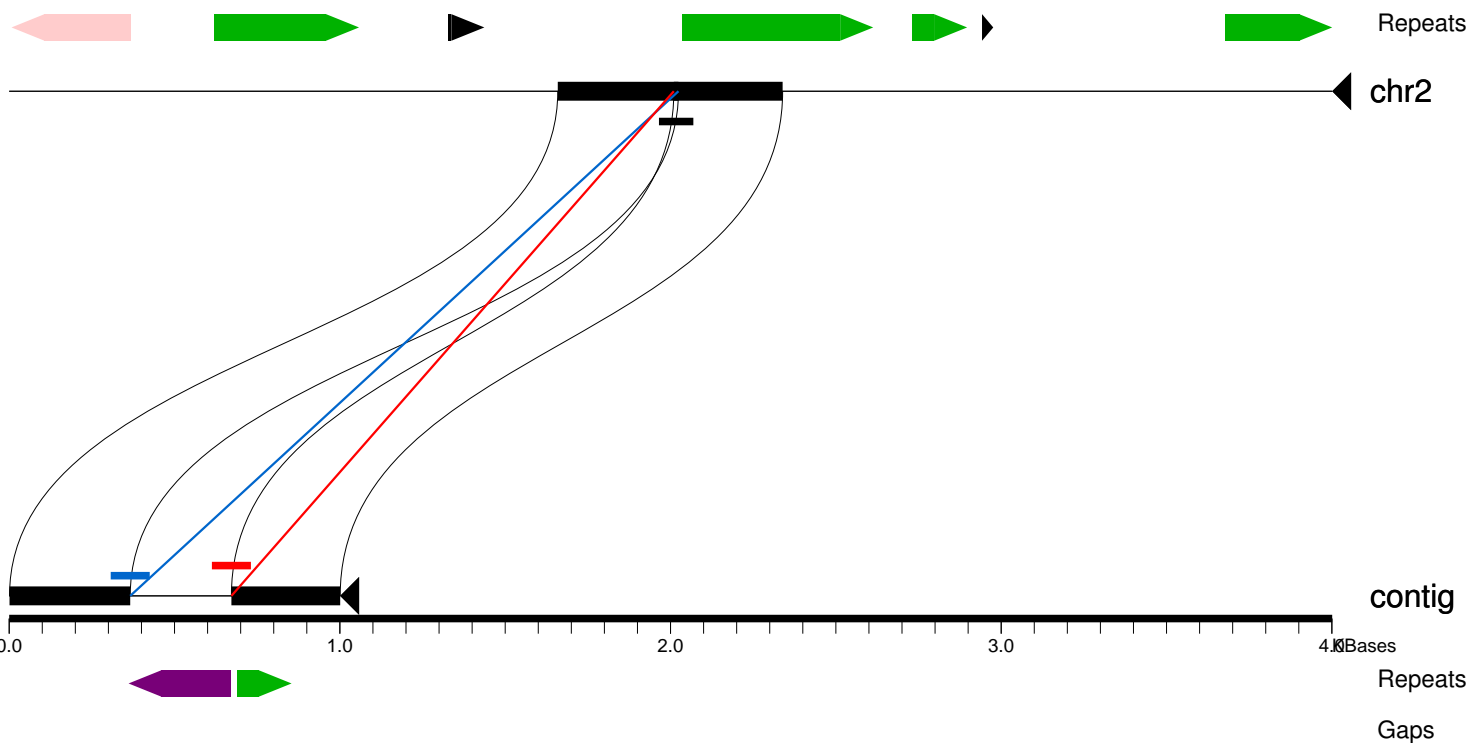

siteID: chr2\_75387905 Scaffitig4 - Breakpoint: chr2:75387891

chr2:75387844-75387950

Overlap Length: 13 INS size: 304 Genotyped: Yes

```
left  GATTCCTG-----GACAG---GAGA--ACTAACCAATTTGAACAGAAGTAATGATTTAAGACATAACA
chrom GATTCCTG-----GACAG---GAGA--ACTAACCAATTTGAACAGAAGTAATGATTTAAGACATAACC
right CACTCCAGCCTGGGCGACAGAGCGAGACTCCGTCTCAAAAAAAAAAAAAAAAAAAAAAAAAAAAAAAGACATAACA
      1*1**1*11111111*****111***111*1111***1111**1*1**11**11*111*****N
```

```
left  GAGGCCGGGCGCGGTGGCTCACGCCTGTAATCCCAGCACTTTGGGAGGCCGAGGCGGGCGG
chrom GA*****---AGTTCCTTAA---TG-AATAAAAG----TTGGGATCTGCTTACACTAAG
right G*****---AGTTCCTTAA---TG-AATAAAAG----TTGGGATCTGCTTACACTAAG
      **222222222222**22**2*2222**2***222**2222*****22222222*22222*
```

Other Simple Repeat Low Complexity DNA LTR LINE SINE

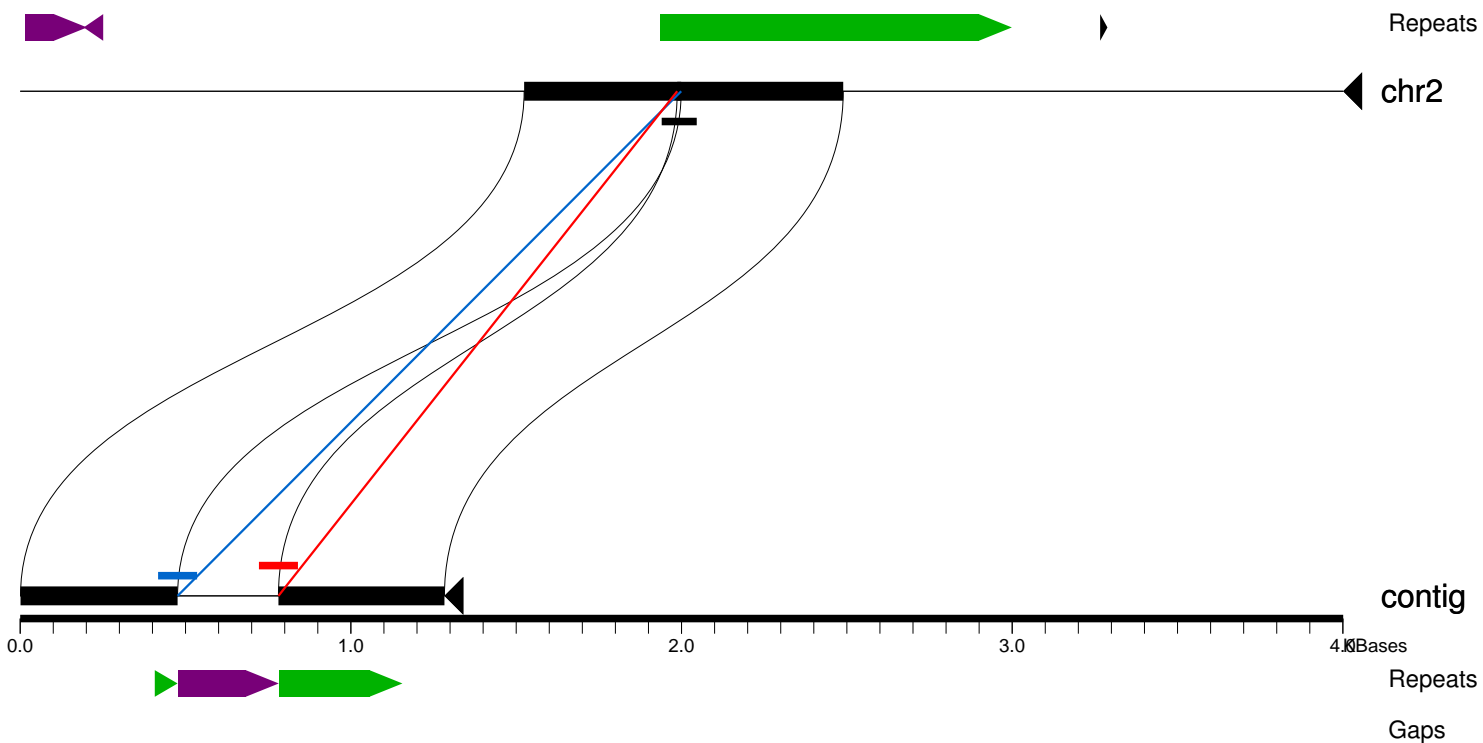

siteID: chr2\_78251615 Scaffoldig1 + Breakpoint: chr2:78251627

chr2:78251576-78251686

Overlap Length: 9 INS size: 291 Genotyped: Yes

```
left  CTG---GAGAGGG-----AGAGTGCCCA-ATGTCTCTAGTCAGCCATTTTGAACCAGAATTCCATCTTT
chrom CTG---GAGAGGG-----AGAGTGCCCA-ATGTCTCTAGTCAGCCATTTTGAACCAGAATTCATCTTT
right CCGCCCGCCTCGGCCTCCCAAAGTGCTGGGATTACAGGCGTGAGCCACCGTG--CCCGGCCATCCATCTTT
      *1*111*1111**111111*1*****1111**11*1111**1*****111**11**1*111******
```

```
left  TTTTTTTTTTGGAGA-CGGAGTCTCGCTCTGTCTCGCCAGGCTGGAGTGCAGTGGCGGGATC
chrom GATTCTC---GATATCTAAATATA--TTAGTAAGCCATG--GGAAAAAAAAAACCTAA--
right GATTCTC---GATATCTAAATATA--TTAGTAAGCCATG--GGAAAAAAAAAACCTAA--
      22**2*2222**2*2*22*2*2*22*22**22***2*22***2222*2222*222*22
```

Other Simple Repeat Low Complexity DNA LTR LINE SINE

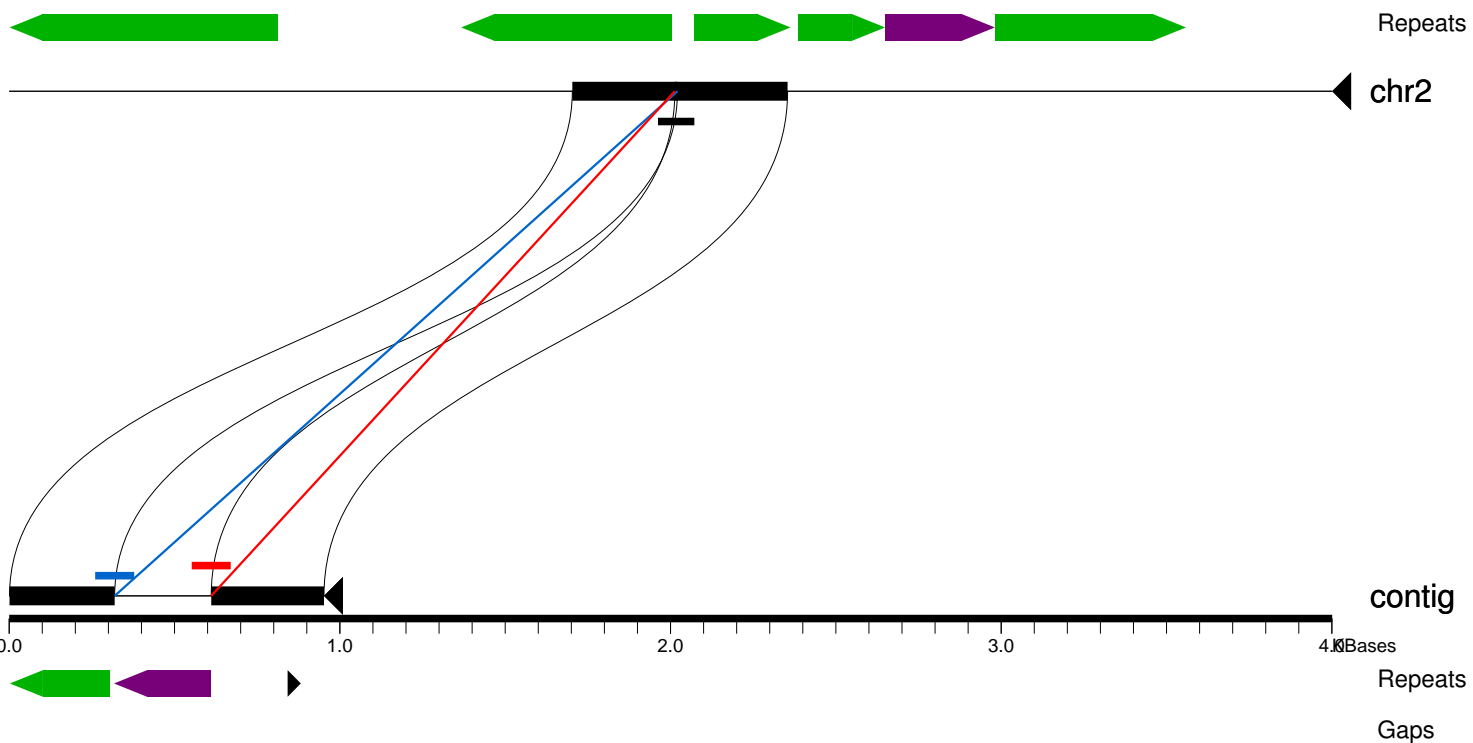

siteID: chr2\_78965418 Scaffitg3 - Breakpoint: chr2:78965411

chr2:78965367-78965470

Overlap Length: 16 INS size: 300 Genotyped: Yes

```
left  ---TTTACCCC---TTGTGAGGCA-----ATA----GTTTGGAAAGCCAGGCTTTGTTTAAAAACAATGTT
chrom ---TTTACCCC---TTGTGAGGCA-----ATA----GTTTGGAAAGCCAGGCTTTGTTTAAAAACAATGTT
right CACTGCACCTCCAGCCTGGGCGACAGAGCGAGACTCCGTCTCAAAAAAAAAAAAAAAAAAAAAAAAATAACAATGTT
      111*11*1**11111*1*1*1**11111*1*1111**1*11***111*11111111111*****
```

  

```
left  TTACAAGGCCGGGCGCGGTGGCTCACGCCTGTAATCCCAGCACTTTGGGAGGCCGAGGCGGGCGG
chrom TTACA AATTCTTTGAGTTACCCCTAACCT---ATCCAAGAGCAATAATTAT-----G
right TTACAAATTCTTTGAGTTACCCCTAACCT---ATCCAAGAGCAATAATTAT-----G
      ***22222222*2*2*22*2*222***222***2**22*22*222222222222222222*
```

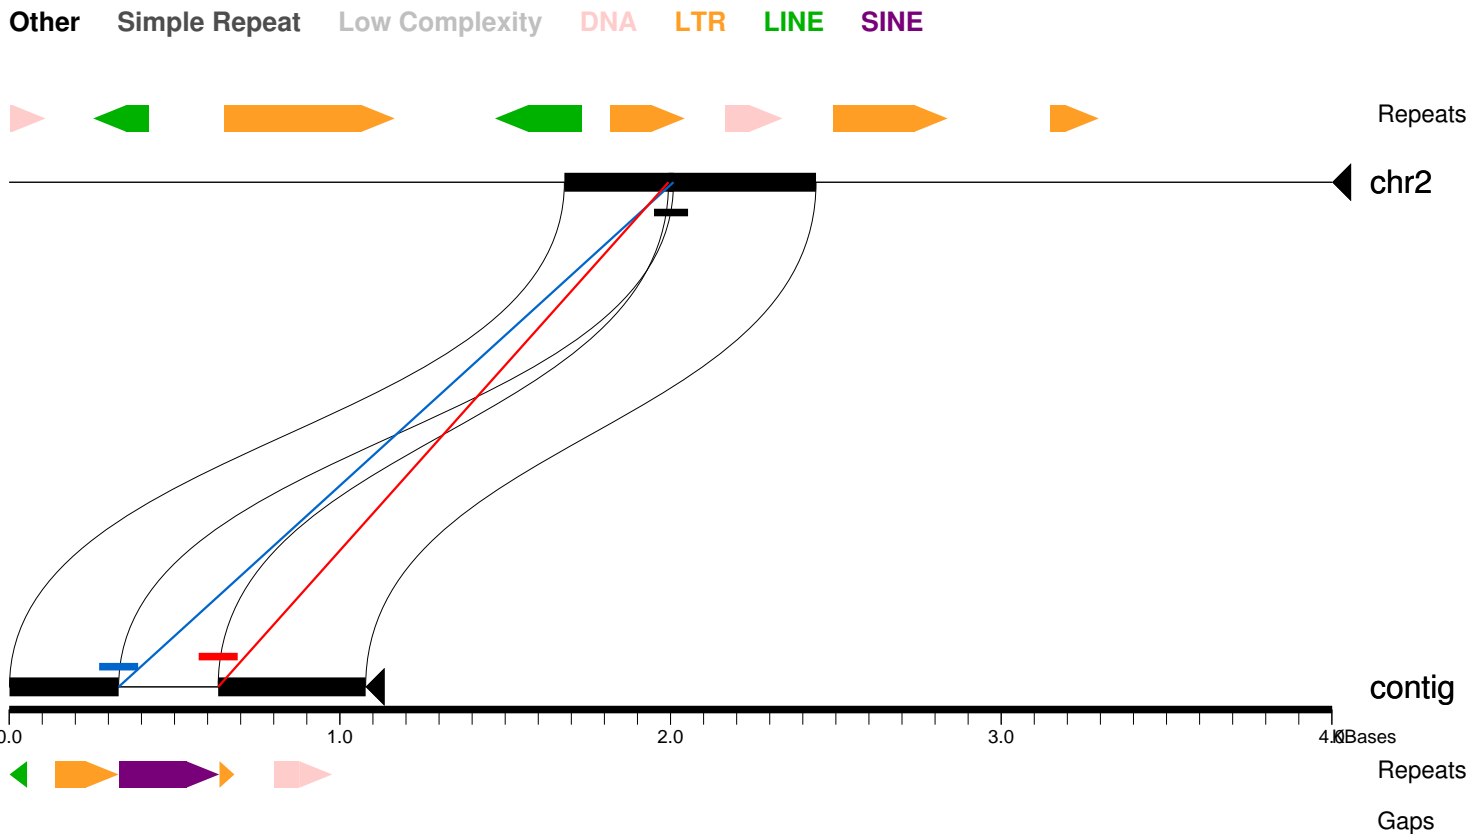

siteID: chr2\_80769016 Scaffitg2 - Breakpoint: chr2:80769011

chr2:80768852-80769184

Overlap Length: 14 INS size: 256 Genotyped: Yes

```

left  ACTCTTCATTTGTGCTCAGGTAGGTACCCCTCTACTGTCTGCAAGTCTCAACTCCAAACCACACTCAGGTT
chrom A-----TTTGTGCTCAGGTAGGTACCCCTCTACTGTCTGCAAGTCTCAACTCCAAACCACACTCAGGTT
right C-----CGCCACTACGC-CCGGCTAATTTTTTTGTATTTTTAG-TAGAGACGG-----GTT
    122222221111111*1*111**1*11**11***1*1*1*111*1*1*1*11*11*1**11111111****

left  TCCCTAGCTTACACTGTGCTCCCTGGAGACACGCACAGATGCAAGAAAAGTGTTTTCCAGAGCTGTTGATA
chrom TCCCTAGCTTACACTGTGCTCCCTGGAGACACGCACAGATGCAAGAAAAGTGTTTTCCAGAGCTGTTGATA
right TCACCGTTTTAG-----CCGGGATGGTCTC-----GATCTCCTGACCTCGTGATC
    **1*1111***1111111111**1***1111*1*11111111111111111*1*1***1**1**11****1

left  TAATACTTTGTGGCTGCTACTTTTT-TTCTAAATTTTTTFTTTTGTAGACGG-----A
chrom TAATACTTTGTGGCTGCTACTTTTT-TTCTAAATGTTTTTTAAATATGGAAAAATGCTAAGCATATCCCAAA
right CGCCCGCCTCGGCCTCCCAAAGTGTCTCTAAATGTTTTTTAAATATGGAAAAATGCTAAGCATATCCCAAA
    111111111*11*1**1*1*111*11*1*****2*****22*2*2*2*22*2222222222222222*

left  GTCTCG-----CTCTGTCGCCCAGGCTGGAGTGC-----AGTGCCGGGATC
chrom GTAAAAGAATGTGTAATGAACCATCATACTGTCACTCAGCTTCAACAATTATAAACTAATGGCGA-ATC
right GTGAAGAATGTGTAATGAACCATCATACTGTCACTCAGCTTCAACAATTATAAACTAATGGCGA-ATC
    **N22*22222222222222222222*2*****2*2**22*22*222222222222*2*****22***

left  TCGGCT-----CACTGCAAGC----TCGGCTCCTGGGTTTAC-----GCCATTCTCTCTG
chrom TTGTTTTTTTCTACATTTCTACCCATTTCCCCAACCCAGATAATTTGTGAAGCAAATTTCCAAA
right TTGTTTTTTTCTACTTCTACCCATTTCCCCAACCCAGATAATTTGTG-----
    *2*22*222222**N*2*2*2*2222**2*22*222*2*2*2222 11N1N1NN1NNN

```

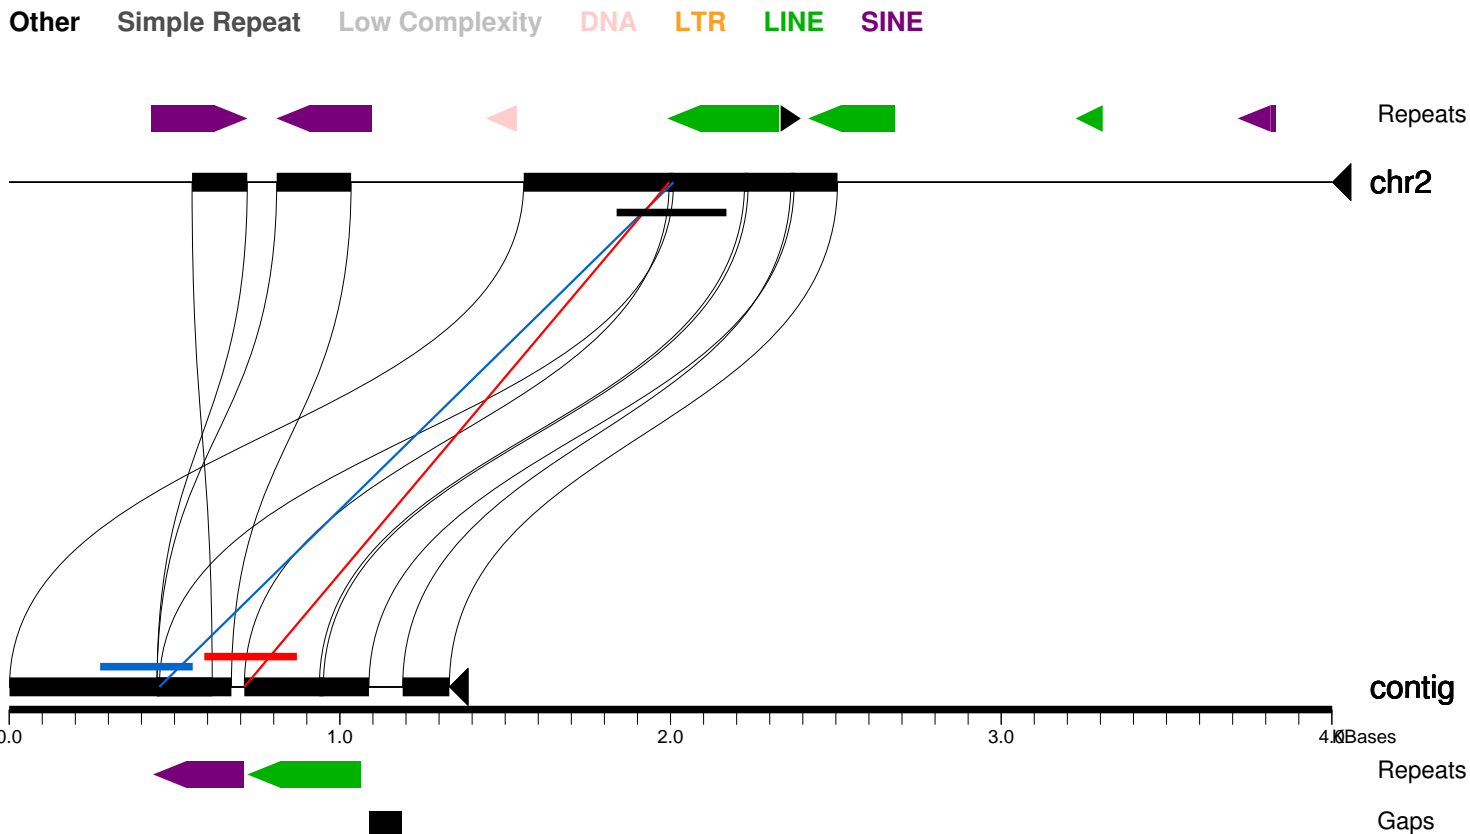

**siteID: chr2\_80861671 Scaffoldig1 + Breakpoint: chr2:80861642**  
**chr2:80861608-80861701**  
**Overlap Length: 26 INS size: 309 Genotyped: No**

```

left    TAATGAG---AGCAAAAT-----CAGAAGTATTGGG----CCCCAT-----GTGAAGACCAT
chrom   TAATGAG---AGCAAAAT-----CAGAAGTATTGGG----CCCCAT-----GTGAAGACCAT
right   CACCGCGCCCGGCTAATTTTTTTGTATTTTAGTAGAGACGGGGTTTTACCTTGTAGCCGTGAAGACCAT
        1*11*1*1111*1*1*1*111111111111*1*1*1111***1111*1*1*1*1111111*****
left    TTTGATAGATTTGGAANNNNNNNNNNNNNNNNNNNNNNNNNNNNNNNNNNNNNNNNNNNNNNNNNNNNNNNN
chrom   TTTGATAGATTTGGAATTTTAACTCAGTCTGTGATTGGGAAGCCACTCAAG-----
right   TTTGATAGATTTGGAATTTTAACTCAGTCTGTGATTGGGAAGCCACTCAAG-----
        ***** * 2222222222222222222222222222222222222222222222222222222222222222
left    NNNN
chrom   ----
right   ----
        2222
  
```

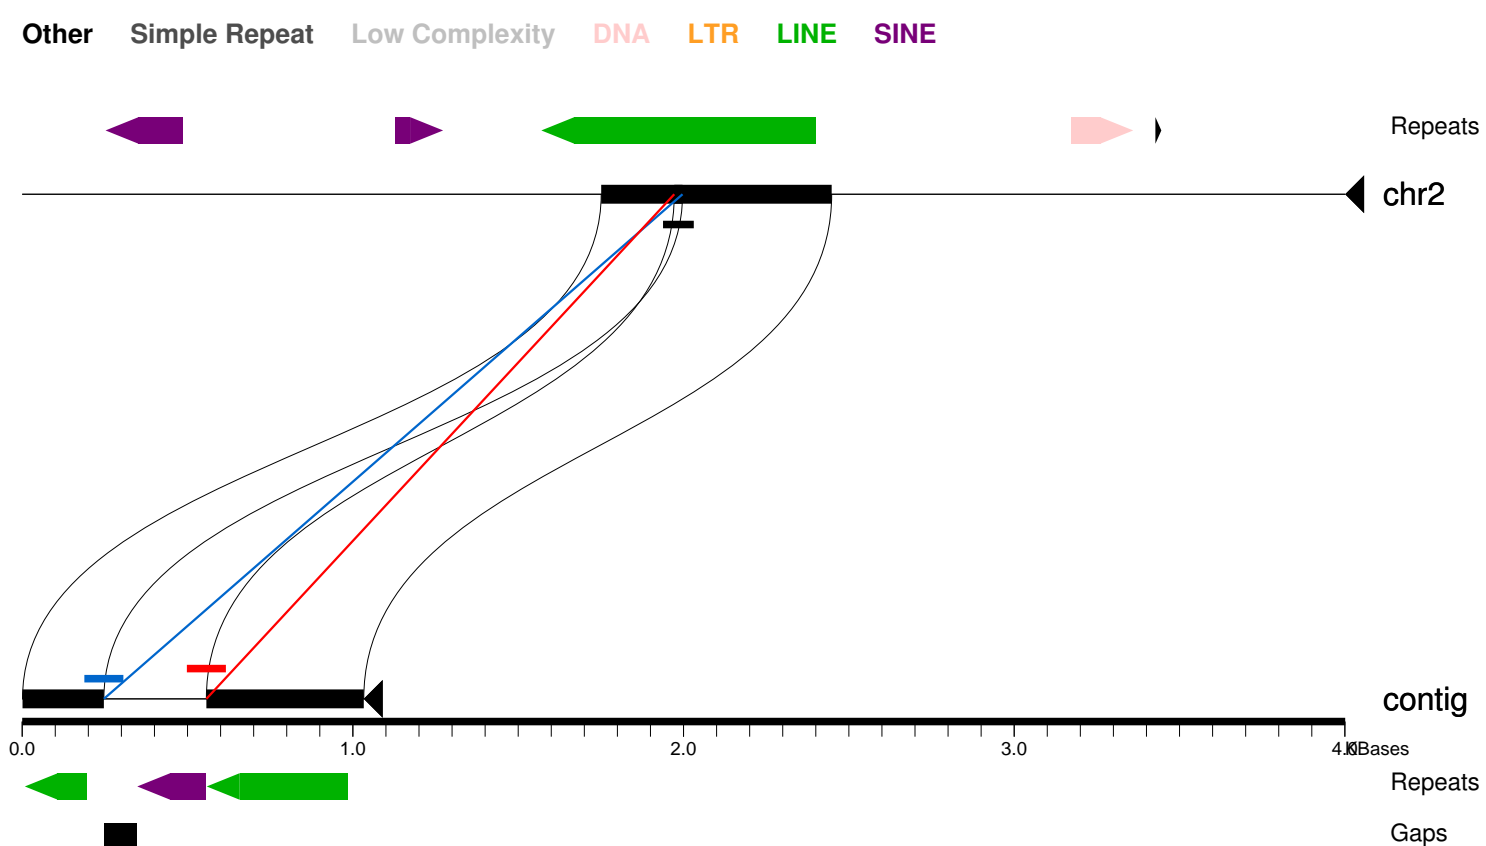

siteID: chr2\_83831724 Scaffitg1 - Breakpoint: chr2:83831720

chr2:83831670-83831779

Overlap Length: 10 INS size: 325 Genotyped: Yes

```
left -----CATAGAAAAGATTGA-TGCTATCATAAAAAAACATGAAAGTATAAAACTCT--CATGACTTT
chrom -----CATAGAAAAGATTGA-TGCTATCATAAAAAAACATGAAAGTATAAAACTCT--CATGACTTT
right TCCGCCCGCCTCGGCCTCCCAAAGTGCTGGGATTACAGG-CGTGAGCC-ACCGCGCCCGGC-CATGACTTT
      111111111*1*1*111111111*1***111*1*1*111*1***1111*11111*1*111*****

left CTTTTTTTTTTTTTTTTTTTTTTTTTTTTTTTTTTTTTTTTTTTTTTTTTTTTTTTTGAGACGGAGTCTTGCTC
chrom CAATACATTTATAAAATTGAGCCTGCAAATCAGCTATGT-----AAC--AAT-TAACAT
right CAATACATTTATAAAATTGAGCCTGCAAATCAGCTATGT-----AAC--AAT-TAACAT
      *22*222***2*2222*22222*22222*2222*2*2*222222*22*2*2*22*22
```

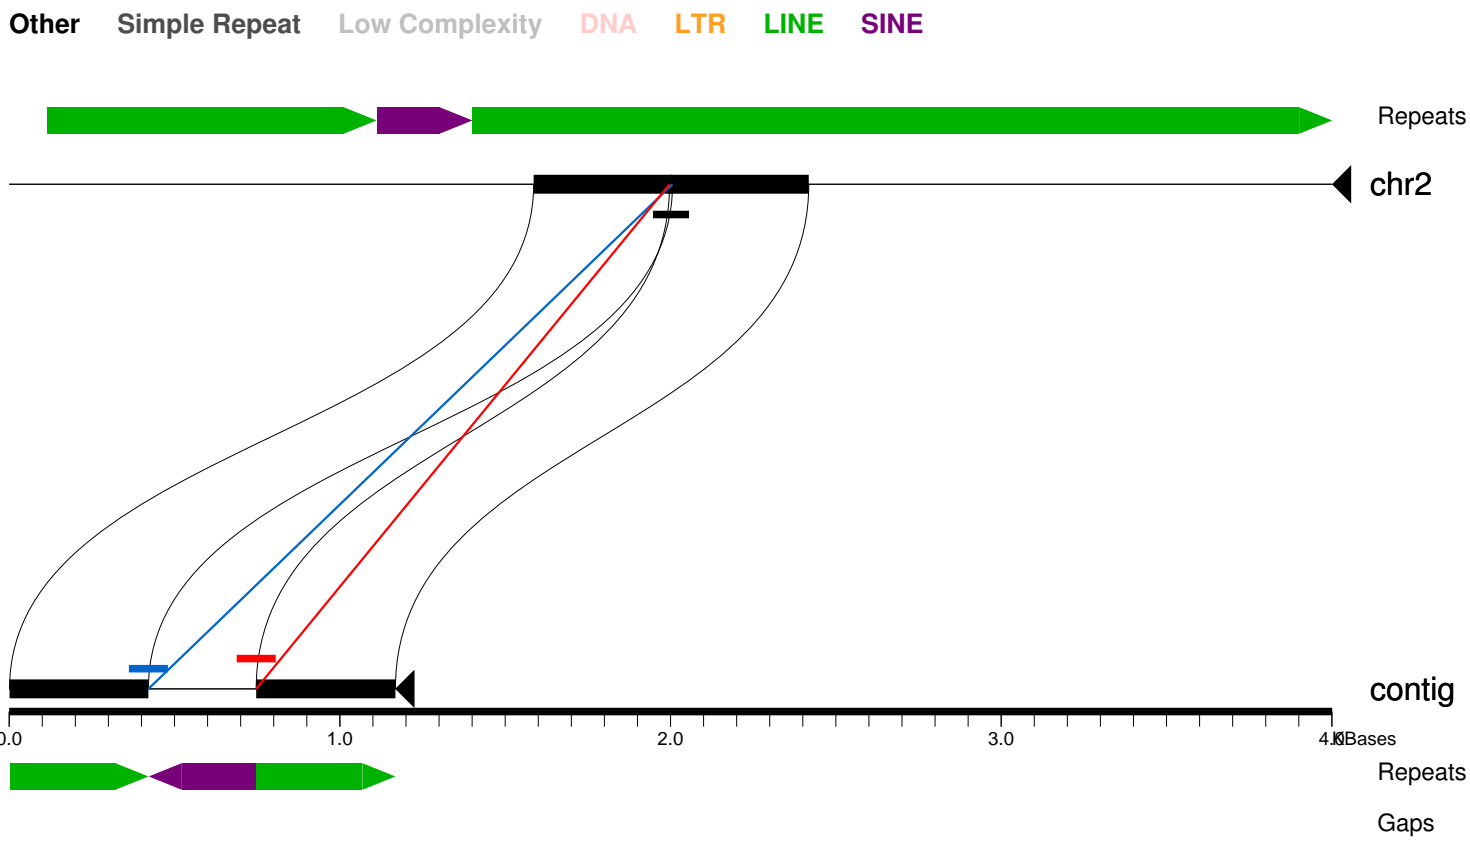





siteID: chr2\_84643584 Scaffitg2 + Breakpoint: chr2:84643573

chr2:84643413-84643739

Overlap Length: 7 INS size: 290 Genotyped: No

```
left T-----GGTGAAAACCTAAAGGGTCACCCAAGCCAAAAATCCACTGAGGAAAAGCCAACCTTCAACTACAT
chrom TTCAGGGTGGTGAAAACCTAAAGGGTCACCCAAGCCAAAAATCCACTGAGGAAAAGCCAACCTTCAACTACAT
right GAGAAATGGCGTGAAACCCAGGGGG----CGGAGCC----TGCAGTGAGCCGAGATTGCG--CCACTGCAC
1NN2NN2N1*****11*1*11***1111*11***1111*1**1***111**1111*111*1***1**1
```

```
left GGGAGAATAGGTCCCTAATGTCCATAACCAAGAGTCAGACCAGGAATCAAAGTAGGAGATGCAAAGCCAGAA
chrom GGGAGAATAGGTCCCTAATGTCCATAACCAAGAGTCAGACCAGGAATCAAAGTAGGAGATGCAAAGCCAGAA
right TCCAGCCTGGG-----CGACAGCGAGACTCCGTC-----TCAAAAAA-----AAAAAAAAAA
111**11*1**1111111111*1*1*1*1***1**1*1*1111111****11*111111111***111*1**
```

```
left GGCCAGAACCTAGAAAAAGATAGGACCACCTGTAATCCCAGCACTTTGGGAGGCCGAG-GCGGGC----GGA
chrom GGCCAGAACCTAGAAAAAGATAGGACCACCTGTAATCCCAGCACTTTGGGAGGCCGAG-GCGGGC----GGA
right ----AAAAAAAAAAAAAAAAAAGGCCCAAAACACC-CCCAGTCAAAAACAACAAAAAAGGGCTACCAAAAGGA
1111*1**111*1****1*1***1**2222212*****222N22222*1N222**N*212*2222***
```

```
left TC-ACGAGGTCAGGAGATCGAGACCATCCTGGCTAACACGGTGAAC--CCTGTCT-----CTA-CT
chrom TTGACAATGGGAAATTTATCCTCAACTTTCTAGC-AGCAGGTATAAATTTGCCTGAATAATACAGACTAGCT
right TTGAAAAGGGGAAATTTATCCNNNNNNNNNNNNNNN-NNNNNNNNNNNNNNNNNNNNNNNNNNNNNNNNNNNN
*22*12*N*22*2222***2NN1N1N1N1N1N121N1N1N1NNN111NNN1111NN1NNNNNNNNN111N11
```

```
left AAAA-----ATACAAAAAAT-----TAGCCGGGC-----G
chrom TCAAGGATGAGGGACACAATGAATCCTGTAATTTCCCATGTAAGATTTAG
right NNNNNNNNNNNNNNNNNNNNNNNNNNNNNNNNNNNNNNNNNNNNNNNNNNNNNNNNNNNNNNNNNNNNNNN
NN11NNNNNNNNN1N1111NN111NNNNNNN1NN11NN1N 1
```

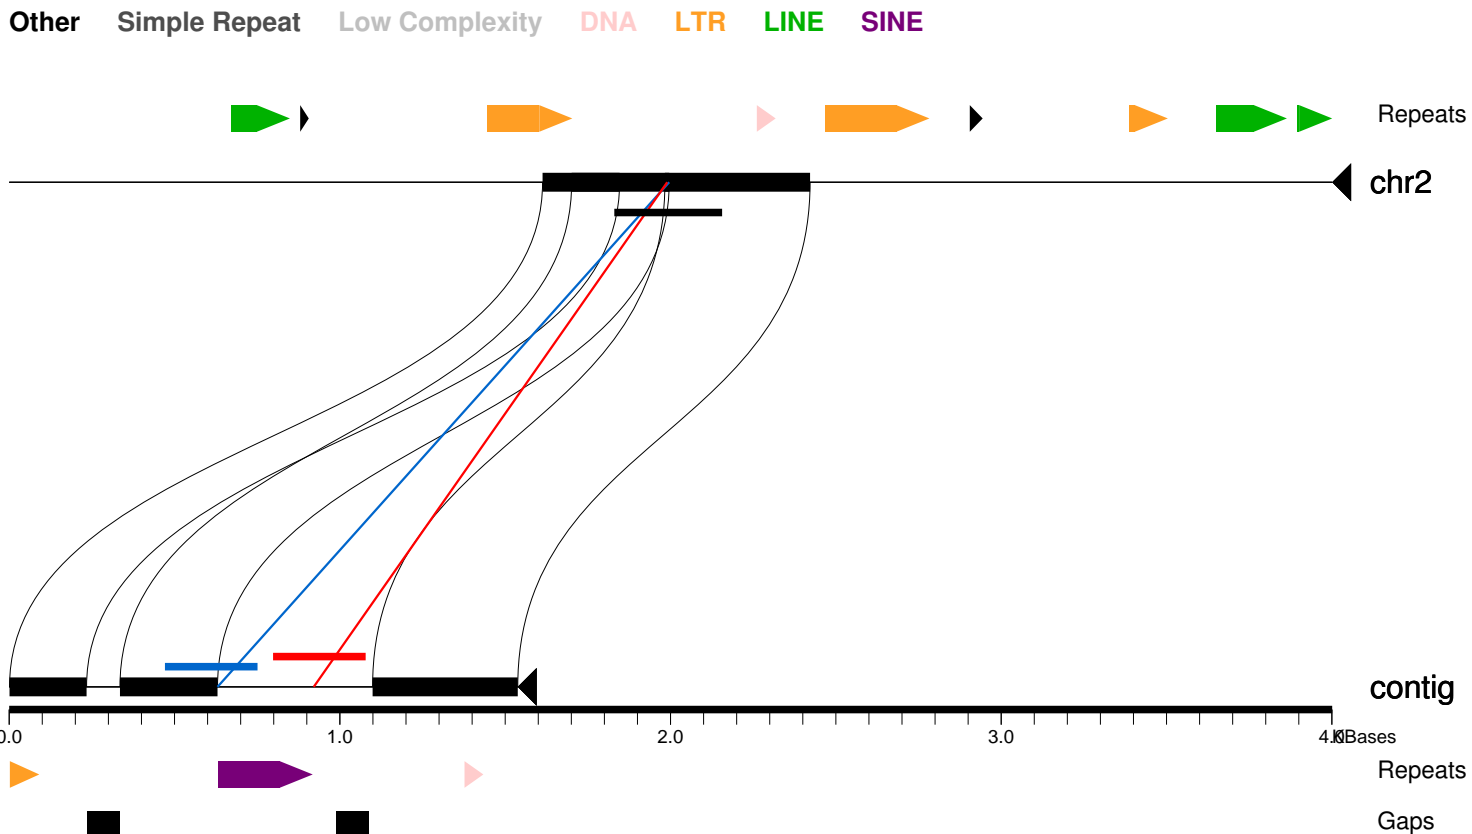

siteID: chr2\_84728763 Scaffoldig23 - Breakpoint: chr2:84728742

chr2:84728696-84728801

Overlap Length: 14 INS size: 295 Genotyped: Yes

```

left  CTAGTTTTTGGGAAT--AGTTTGAGTAGGATTGGGATTAGTTCTTCTTT-----AAAAGTTT
chrom CTAGTTTTTGGGAAT--AGTTTGAGTAGGATTGGGATTAGTTCTTCTTT-----AAAAGTTT
right C--GCCACTGCACTCCAGCCTGGGCGACAGAGCGAA-ACTCCGTCTCAAAAAAAAAAAAAAAAAAAA*AAAAGTTT
      *11*1111*1*1*11*11*11*1*1111*11*1*11*1*1*1***1111111111111111111*AAAAA*
  
```

```

left  GGTAAAGGCCGGGCGCGGTGGCTCACGCCTGTAATCCCAGCACTTTGGGAGGCCGAGGCGGGCGG
chrom GGTAAATTCAG---CAGTG----AAGCCTTCAGGTCCTGGGTTTTT-----CTTTACTGGGAG
right GGTAAAGTTTCAG---CAGTG----AAGCCTTCAGGTCCTGGGTTTTT-----CTTTACTGGGAG
      *****N22*2*222*2***2222*2*****22*222*2*222***2222222*2222*2**22*
  
```

Other Simple Repeat Low Complexity DNA LTR LINE SINE

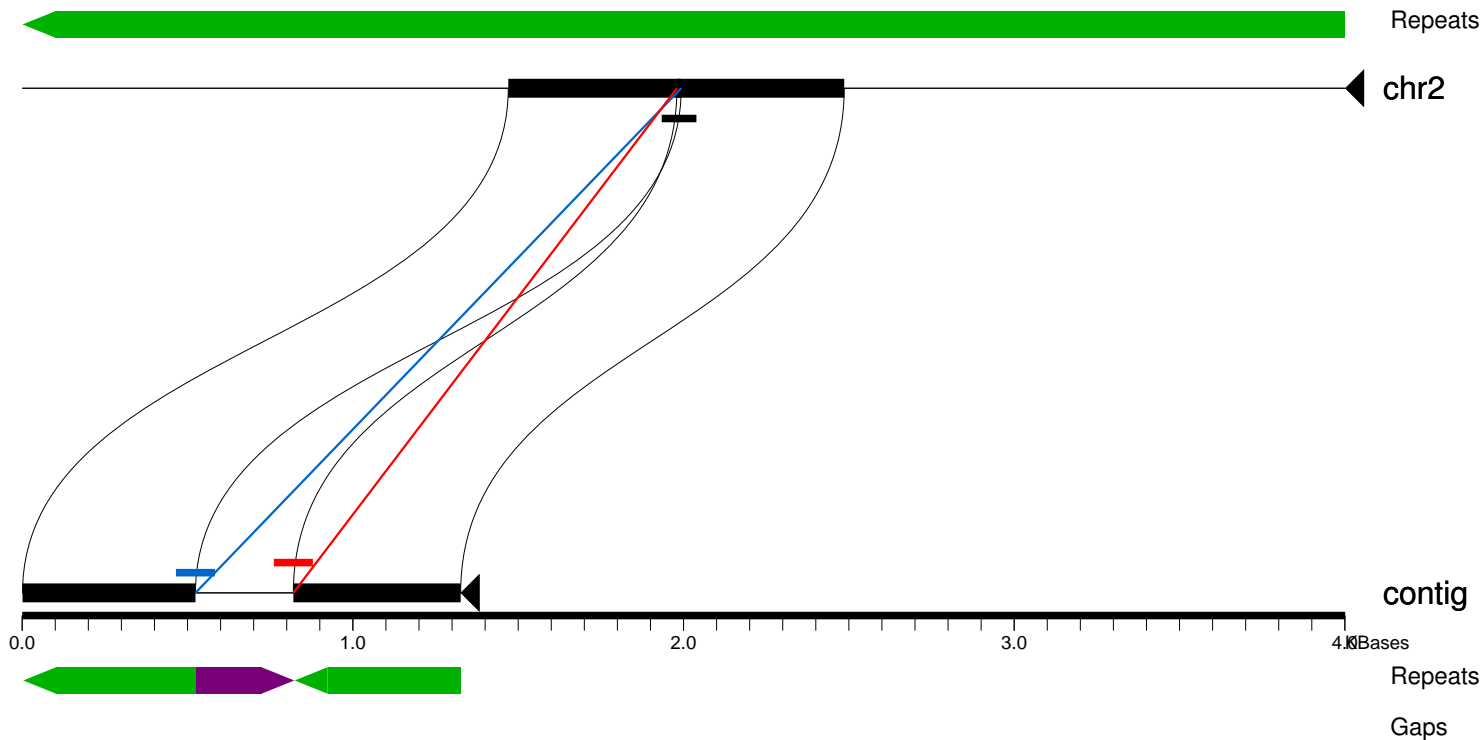

siteID: chr2\_90006195 Scaffold1 + Breakpoint: chr2:90006162

chr2:90006118-90006221

Overlap Length: 16 INS size: 324 Genotyped: No

```
left  ATTAGTGAATCTACATT--AATGT-CTCTAATTACA-----ATCCACATCTA-----CAGTTTCTCCT
chrom ATTAGTGAATCTACATT--AATGT-CTCTAATTACA-----ATCCACATCTA-----CAGTTTCTCCT
right CCACCCGCCTCGGCCTCCCAAAGTGCTGGGATTACAGGCGTGAGCCACCGCGCCCGGCC CAGTTTCTCCT
      111111*11*11*1*111**1**1**111*****111111*1***11*11111111******
```

```
left  TTTTNNNNNNNNNNNNNNNNNNNNNNNNNNNNNNNNNNNNNNNNNNNNNNNNNNNNNNNNNNNNNNNNNNNN
chrom TTTT-----ATATTTGTAGCTTTTTTCCAAACTGAGAATCTTGGCTGTAATT
right TTTT-----ATATTTGTAGCTTTTTTCCAAACTGAGAATCTTGGCTGTAATT
      ***222222222222222222222222222222222222222222222222222222222222222222222222
```

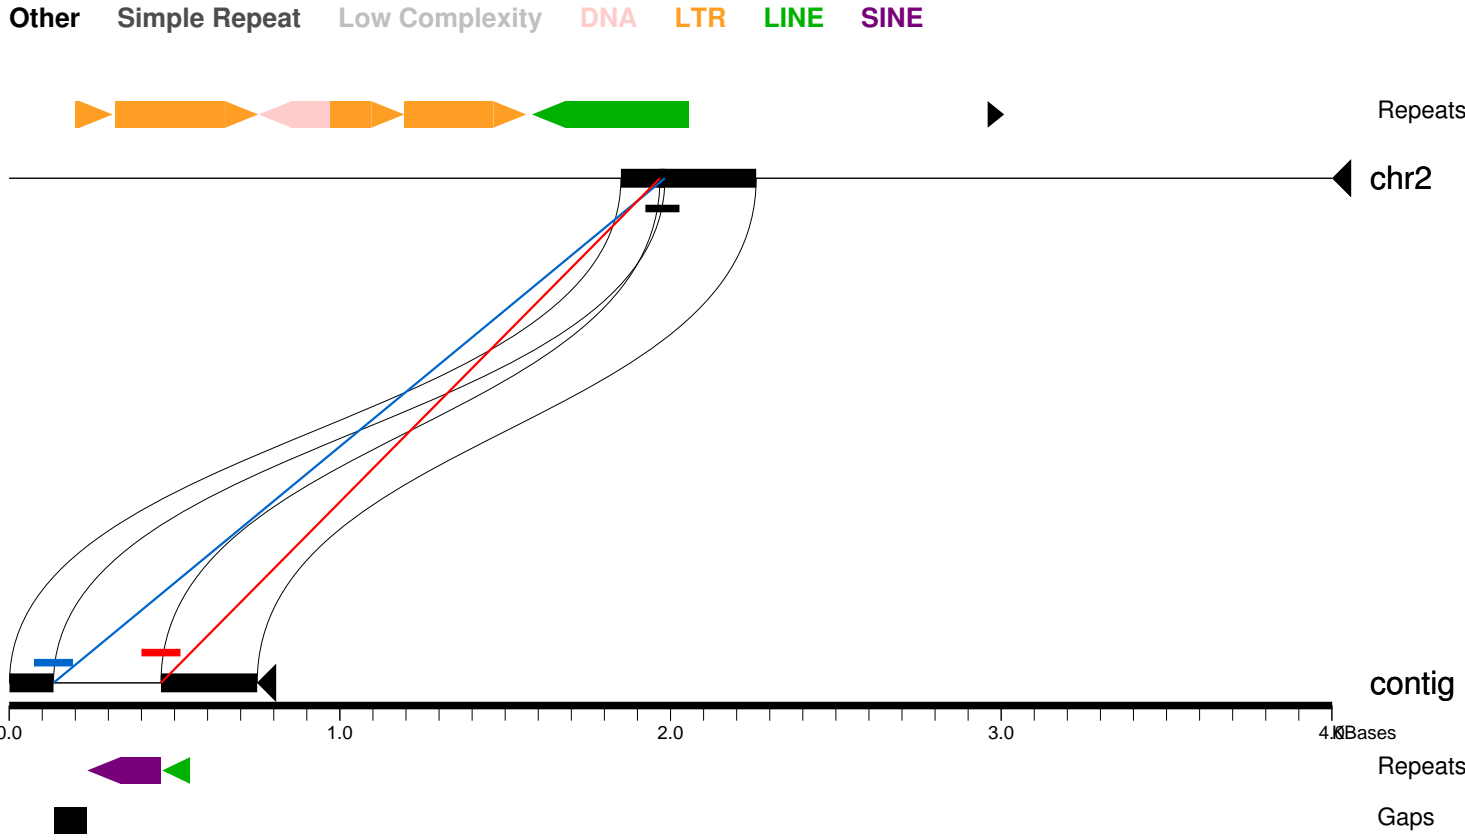

siteID: chr2\_98582154 Scafftig2 - Breakpoint: chr2:98582147

chr2:98582098-98582206

Overlap Length: 11 INS size: 293 Genotyped: Yes

```
left   CATGGCTGGGCACCAATTCA-TCTAATCTCACAAACAGCAC-AGATTACTT-----AAAAAT
chrom  CATGGCTGGGCACCAATTCA-TCTAATCTCACAAACAGCAC-AGATTACTT-----A
right  GATCCCG-----CCACTGCACTCCAGCCTGGGCGACAGAGCGAGACTCCGTCTCAAAAAAAAAA
1**11*111111***1*1**1**1*11**11111***11*1***1*1*1*1111111111111*
```

```
left   TTCCGGCCGGGCGCGGTGGCTCACGCCTGTAATCCAGCACTTTGGGAGGCCGAGGCGGGCGG
chrom  TTCCGTAATGAAATTAGGGA----ATG--TGTAAT----GAAAATTACTGCTCCTAAAAATCTGA
right  TTCCGTAATGAAATTAGGGA----ATG--TGTAAT----GAAAATTACTGCTCCTAAAAATCTGA
***222222222**222222*2*22*****2222*2*22**222222**2*222222*2
```

Other Simple Repeat Low Complexity DNA LTR LINE SINE

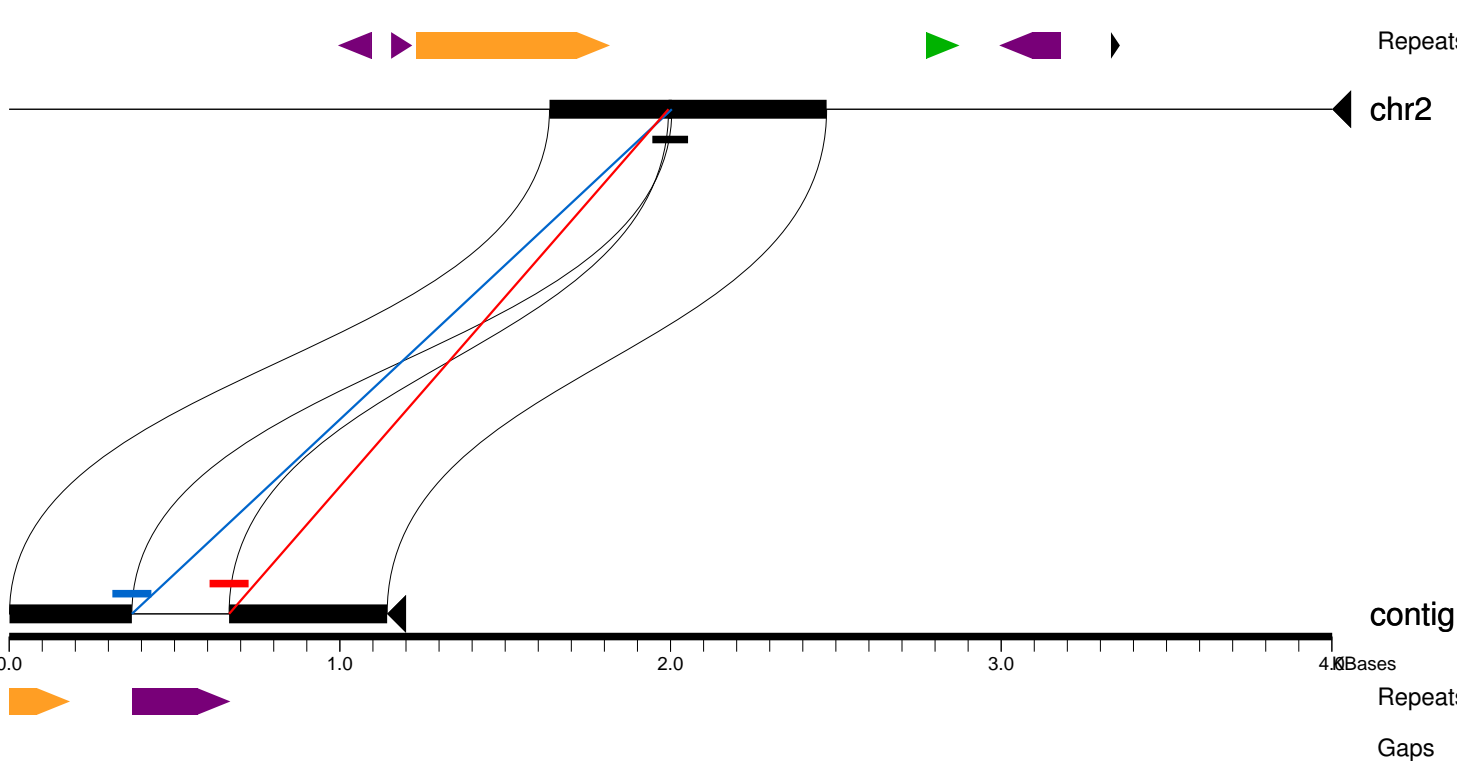

siteID: chr2\_9888810 Scaffitg6 + Breakpoint: chr2:9888790

chr2:9888759-9888849

Overlap Length: 12 INS size: 315 Genotyped: Yes

```
left  -----CTGCC-----CCTACTAATTT-----AGTAAATG-----GCTTTGTCACGGGTGTGT
chrom -----CTGCC-----CCTACTAATTT-----AGTAAATG-----GCTTTGTCACGGGTGTGT
right TCCACCCGCCTCGGCCTCCCAAAGTGCTGGGATTACAGGCGTGAGCCACCGCGCCCGGCACGGGTGTGT
      11111*1***1111***1*1**11*111111*1**1*1*1111111111111**111*1*****
```

```
left  TTTTTTTTTTTTTTTTTTTTTTTTTTTTTTTTTTTGAGACGGAGTCTCGCTCTGTCGCCAGGCCGGACTGCGAAC
chrom TATTGTTTGCTTTTCTTT-----ATGGCATCCCTCA-TGTCT-----GGGCT---AA-
right TATTGTTTGCTTTTCTTT-----ATGGCATCCCTCA-TGTCT-----GGGCT---AA-
      *2**2***22****2***22222222222222*2**22**2*2*22****222222222**2**222**2
```

```
left  TGCAGTG
chrom -GCAGGT
right -GCAGGT
      2****22
```

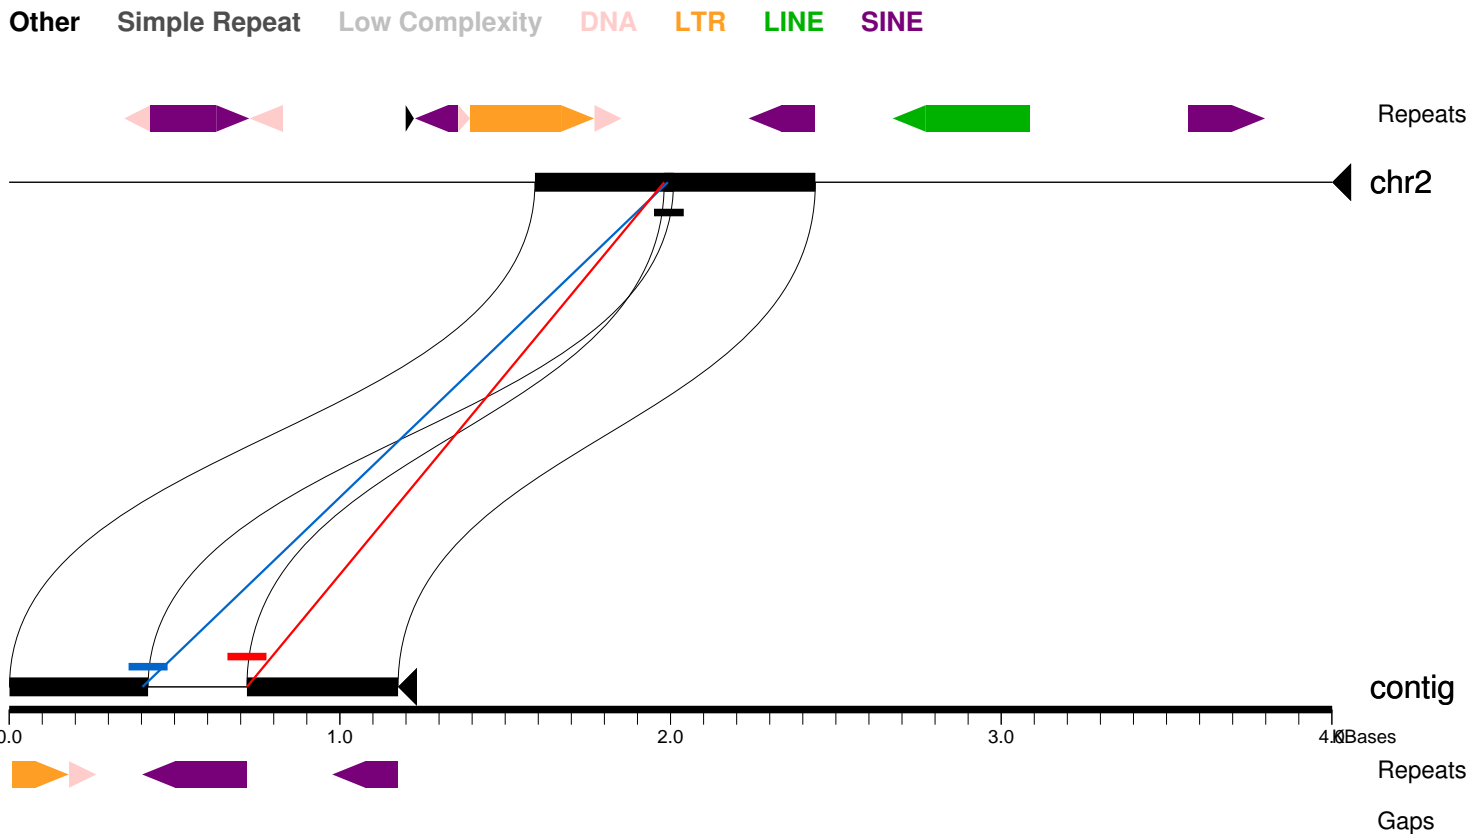

siteID: chr20\_10377910 Scaffitig1 - Breakpoint: chr20:10377902

chr20:10377865-10377961

Overlap Length: 20 INS size: 285 Genotyped: Yes

```
left  A-----ACTTCAAAACAAAATA--ACAAGGAACTAATAATTGGT-----AAAATAAAAA
chrom A-----ACTTCAAAACAAAATA--ACAAGGAACTAATAATTGGT-----AAAATAAAAA
right GCCGAGATCCCGCCACTGCCTCCAGCCTGGGAGACAGAGCGAG-ACTCCGTCTCAAAAAA*****
      11111111111111111111***1**111**111*111*1*11**1*1*11*1*11**1111111111*****
```

```
left  AGAACATAGTGCCGGGCGCGGTGGCTCACGCCTGTAATCCCAGCACTTTGGGAGGCCGAGGCGGGCGGAT
chrom AGAACATAGTACC-----TATTACTAACT--GGCAGTGGCAATAGGTAATGAGG-----T
right AAAACATAGTACC-----TATTACTAACT--GGCAGTGGCAATAGGTAATGAGG-----T
      *1*****2**22222222*22**2**2222*2*2*22**22*22*222*****22222222222222*
```

```
left  CA
chrom TA
right TA
      2*
```

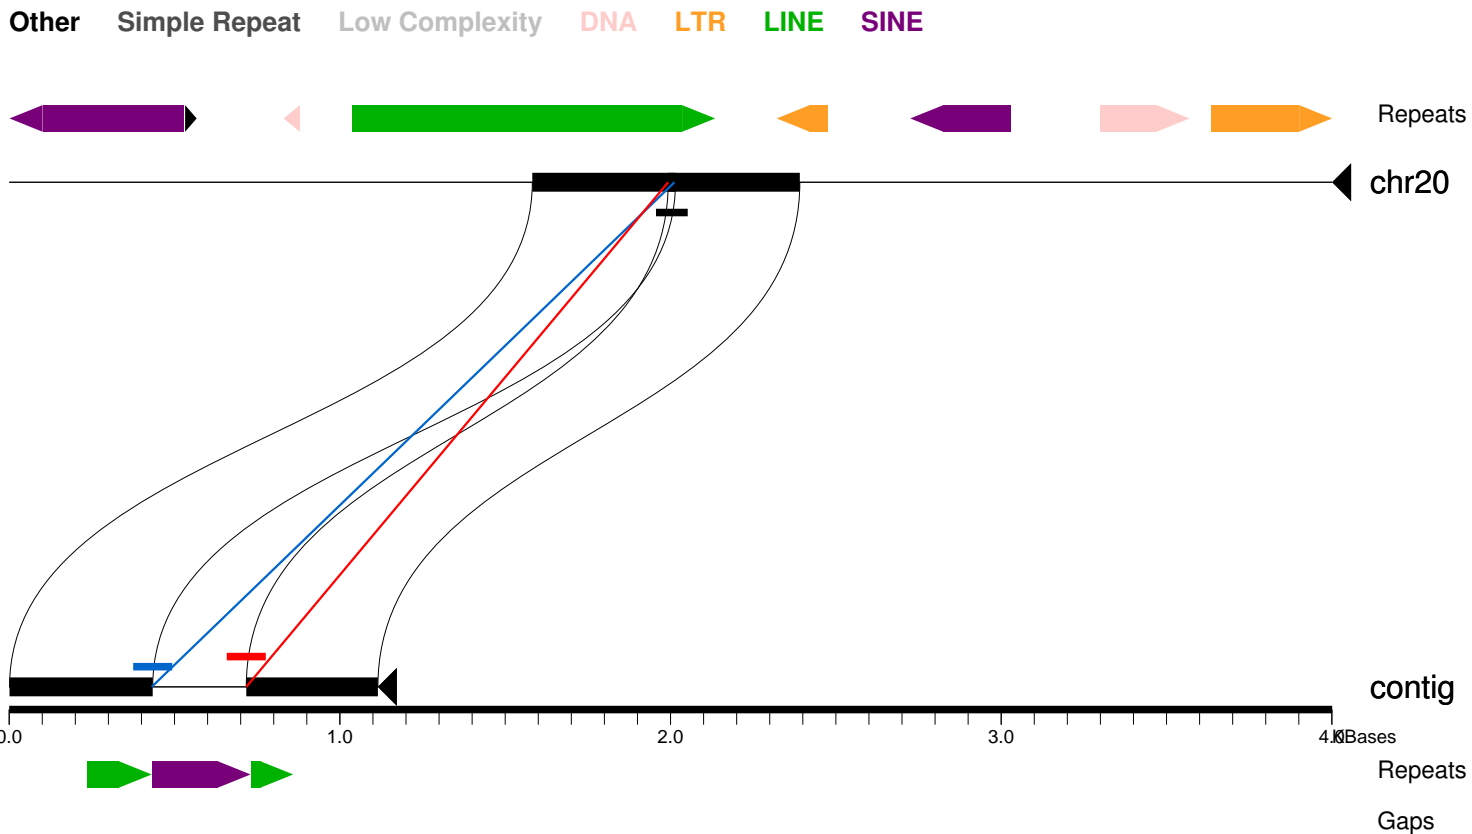

siteID: chr20\_13704145 Scaffig1 + Breakpoint: chr20:13704148

chr20:13704102-13704205

Overlap Length: 14 INS size: 295 Genotyped: Yes

```

left   TT-----TTCTAATATTTTCATTTTCATTTTCAGC-TCATTAAT-GTGCTCATCC--TAGATGAT
chrom  TT-----TTCTAATATTTTCATTTTCATTTTCAGC-TCATTAAT-GTGCTCATCC--TAGATGAT
right  CCGCCCGCCTCGGCCTCCCAAAGTGC-TGGGATTACAGGCGTGAGCCACCGCGCCCGGCCCTAGATGAT
       11111111111111111111**11*1*1*1*1*111***1111**1*1*111*11*1**1*11**11*****
  
```

```

left   ATTTT*TTTTTTTTT-TTTGAGATGGAGTCTTGCTCTGTTGCCCAGGCTGGAGTGCAGTGGCGCGA
chrom  ATTTT*AAAACTCTCATTTGACACCAAGT-TTGCAATTTAG-----AAGGAAATC-----A
right  ATTTT*AAAACTCTCATTTGACACCAAGT-TTGCAATTTAG-----AAGGAAATC-----A
       *****22222*2*22*****2*222***2*****22*2*2*222222222*22*2*2*222222*
  
```

Other Simple Repeat Low Complexity DNA LTR LINE SINE

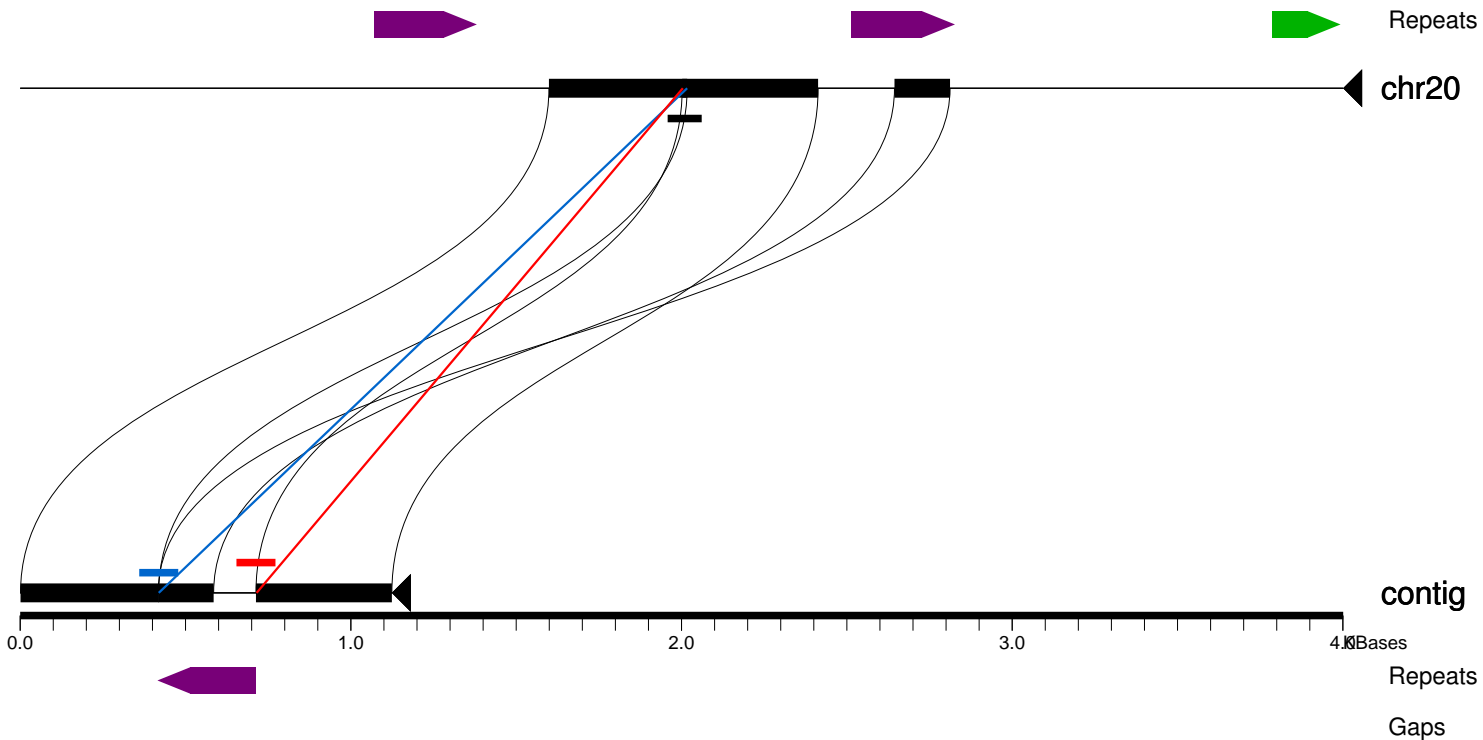



siteID: chr20\_15087687 Scaffitig5 + Breakpoint: chr20:15087660

chr20:15087614-15087719

Overlap Length: 14 INS size: 297 Genotyped: Yes

```
left   CCCCTAATGTATG-----ATTTATATGTATATAATA-TTTGACATCAC----AGATACACACAATCC
chrom  CCCCTAATGTATG-----ATTTATATGTATATAATA-TTTGACATCAC----AGATACACACAATCC
right  CCACCCGCTCGGCCTCCCAAAGTGTCTGGGATTACAGGCGTGAGCCACCGCGCCCGGCCACACACAATCC
      **1*11111*11*11111111*1*11*11*11**1*1111*11*1**1*1*11111*11*****
```

```
left   TTTTFFF---TTTTTG-AGACGGAGTCTCGCTCTGTCGCCAGGTCGGACTGCGGACTGCAGTAGC
chrom  TTTATATACCTTTATGTATATAGATTGT---TCTGT-----AATTCATA--ACATTTAA
right  TTTATATACCTTTATGTATATAGATTGT---TCTGT-----AATTCATA--ACATTTAA
      **2*2*222***2**2*2*22**2*2*222*****222222222222*2*2*22*222**2*222
```

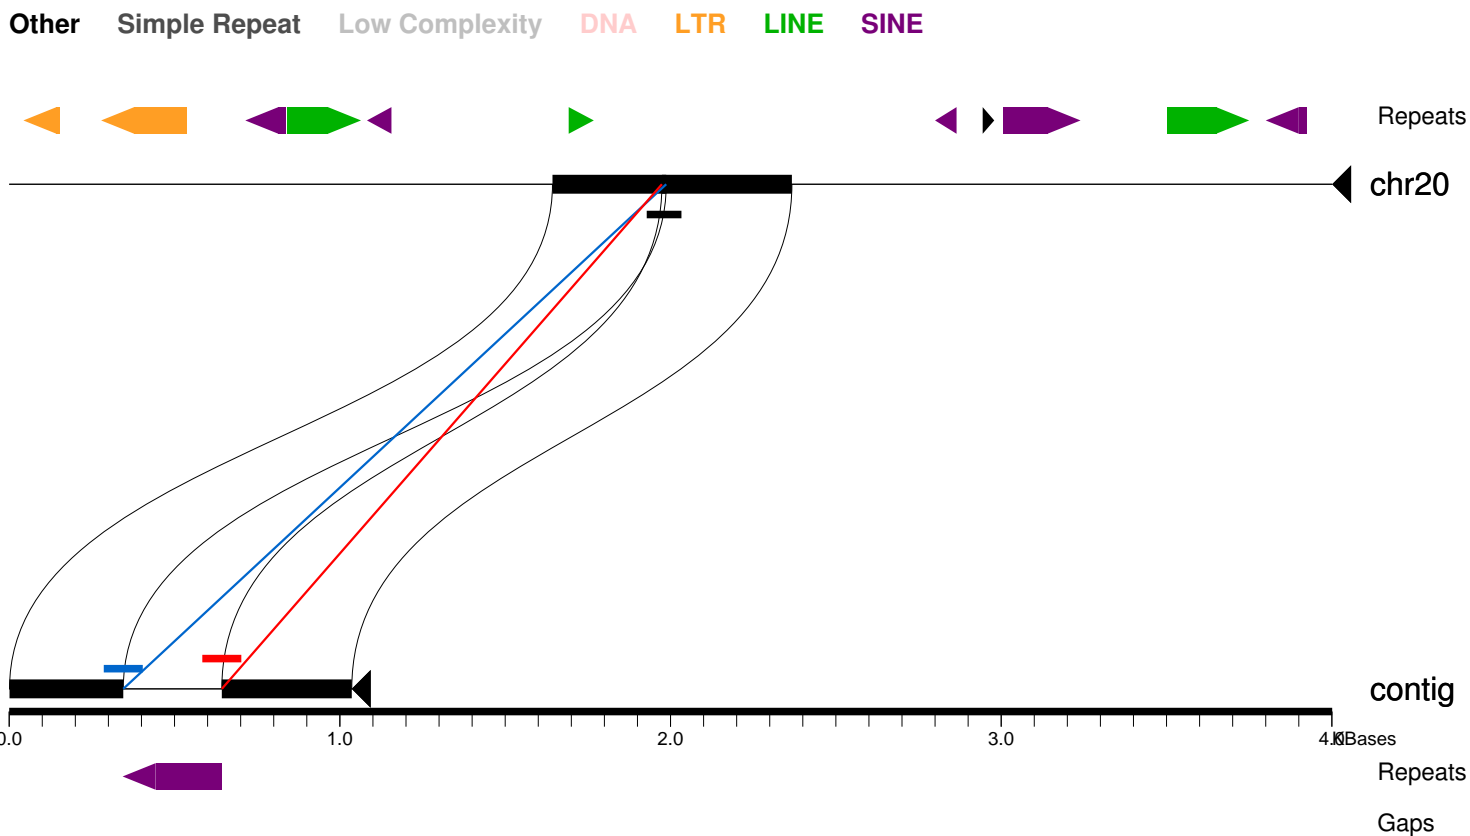

siteID: chr20\_1546208 Scaffitig14 - Breakpoint: chr20:1546214

chr20:1546169-1546273

Overlap Length: 15 INS size: 296 Genotyped: Yes

```
left  AGCTGT-----GGGAAAACACATCCACATTCATTC---ATCTGCTCATCATTTAAGAAATGTTT
chrom AGCTGT-----TGGAAAACACATCCACATTCATTC---ATCTGCTCATCATTTAAGAAATGTTT
right GCCACTGCACTCCAGCCTGGGCGACAGAGCGAGACTCCGTCTCAAAAAAAAAAAAAAAAAAAAGAAATGTTT
      11*11*1111111111112**111***1*1*1*1*1**11**111*1111111*11*111*****

left  CCTGGCCGGGCGCGGTGGCTCACGCCTG-TAATCCCAGCACTTTGGGAGGCCGAGGCCGGGCGGA
chrom CCTG--AGAGCCTGATATGTCCCTAGTGCTGGTCTCCTC---TTGGGATGCCTG-----
right CCTG--AGAGCCTGATATGTCCCTAGTGCTGGTCTCCTC---TTGGGATGCCTG-----
      ***222*2**22*2*222**2*222**2*22**2*22*222*****2***222222222222
```

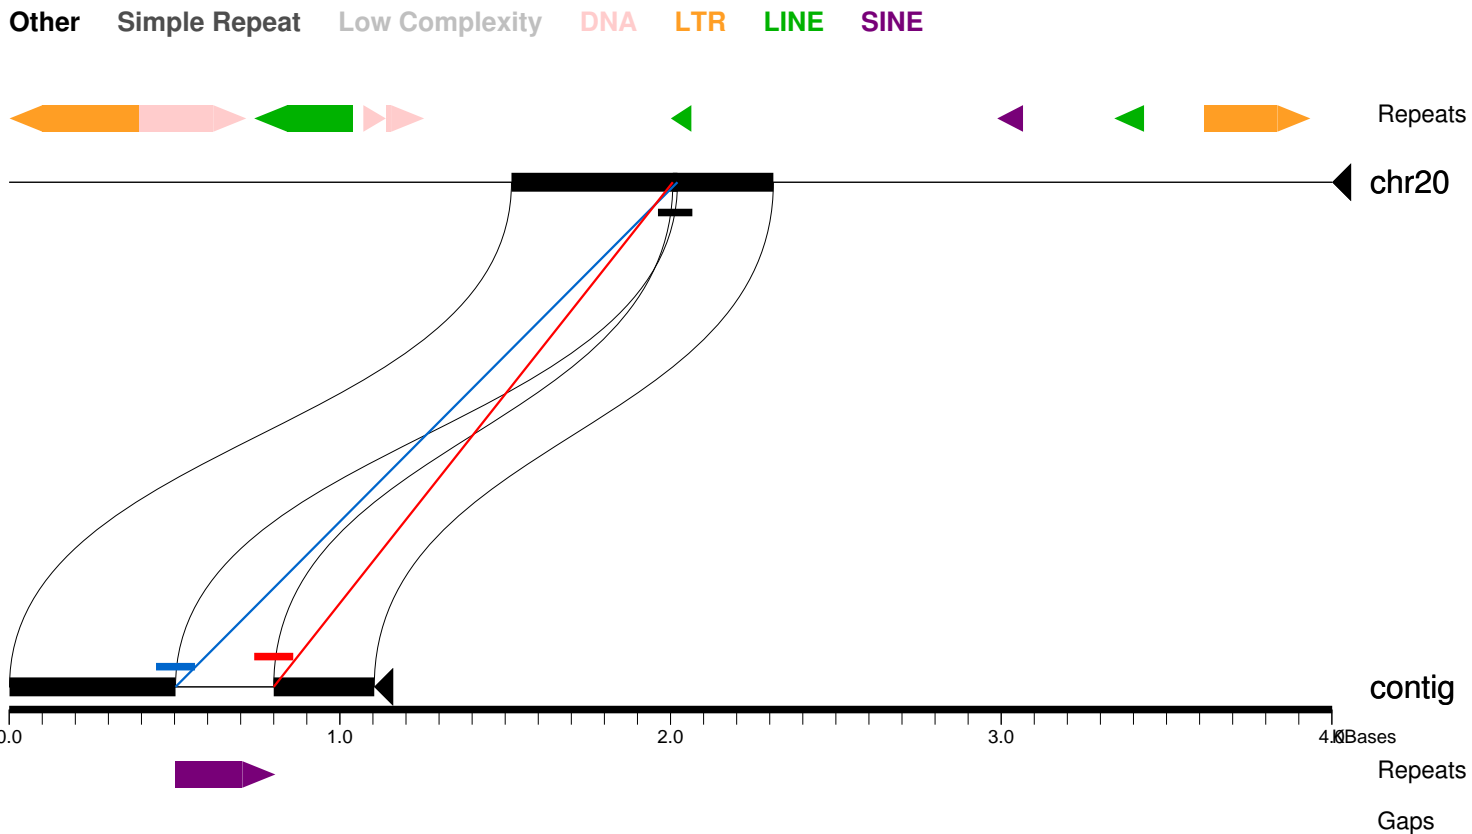



siteID: chr20\_1990369 Scaffold2 - Breakpoint: chr20:1990373

chr20:1990317-1990426

Overlap Length: 4 INS size: 307 Genotyped: Yes

```
left  AAG-----GAGAAAAATAGCATGGCTTTGTCAATGAAGTGCAGAAAAGTGAGTGAGAAAGAGAGG
chrom AAG-----GAGAAAAATAGCATGGCTTTGTCAATGAAGTGCAGAAAAGTGAGTGAGAAAGAGAGG
right CTGCACTCCAGCCTGGGCGACAGAGCGAGACTCCGTC--TCAAAAAAAAAAAAAAAAAAAAAAAAAAAGG
      11*1111111111111*1*11*1*1***11*1*11***11*1*1111*1***111*111*1***1*1***
```

```
left  CGGCCG--GGCGCGGTGGCTCACGCCGTGTAATCCCAGCACTTTGGGAGGCCGAGGCGGGCGG
chrom CACAAGATGAGGCTACAGAGCAGGCA--GAAGCCCTAGAATTAAGGA--CAAAC-----
right CACAAGATGAGGCTACAGAGCAGGCA--GAAGCCCTAGAATTAAGGA--CAAAC-----
      *2222*22*22**2222*22**2**2222**2***222*2**22***22*22*22222222
```

Other Simple Repeat Low Complexity DNA LTR LINE SINE

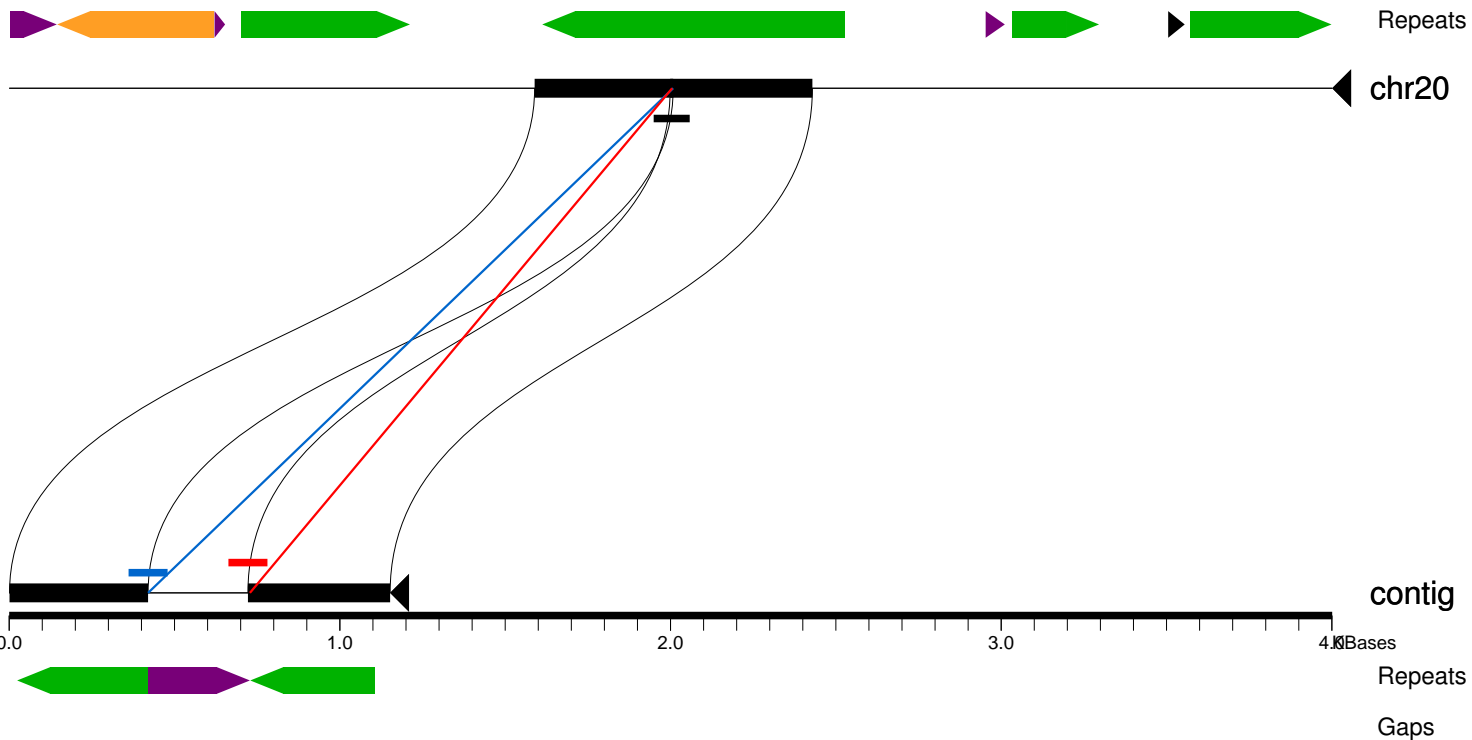



siteID: chr20\_2371712 Scaffitig1 + Breakpoint: chr20:2371719

chr20:2371666-2371778

Overlap Length: 7 INS size: 375 Genotyped: No

```
left  ACTTCAACTCTGCTGAGAGAGACAGGAACCAATG----GAGAGCTTGAGAA---CAACGAGTGATCTNNN
chrom ACTTCAACTCTGCTGAGAGAGACAGGAACCAATG----GAGAGCTTGAGAA---CAACGAGTGATCTTAG
right TTAGCCGGGATGGTCTCGATCTCCTGACCTCGTGATCCGCCCCTCGGCCTCCCAAAG-GTGATCTTAG
      1111*11111**1*11111111*11**1*111**1111*111**1*11*11111***1*1*****222

left  NNNNNNNNNNNNNNNNNNNNNNNNNNNNNNNNNNNNNNNNNNNNNNNNNNNNNNNNNNNNNNNNNNNNNNN
chrom ATTTTAAACAGGATCCTTCTGGCTTCCATGTTGAGAATGAGCCCTGAGGAT-----
right ATTTTAAACAGGATCCTTCTGGCTTCCATGTTGAGAATGAGCCCTGAGGAT-----
      22222222222222222222222222222222222222222222222222222222222222222222
```

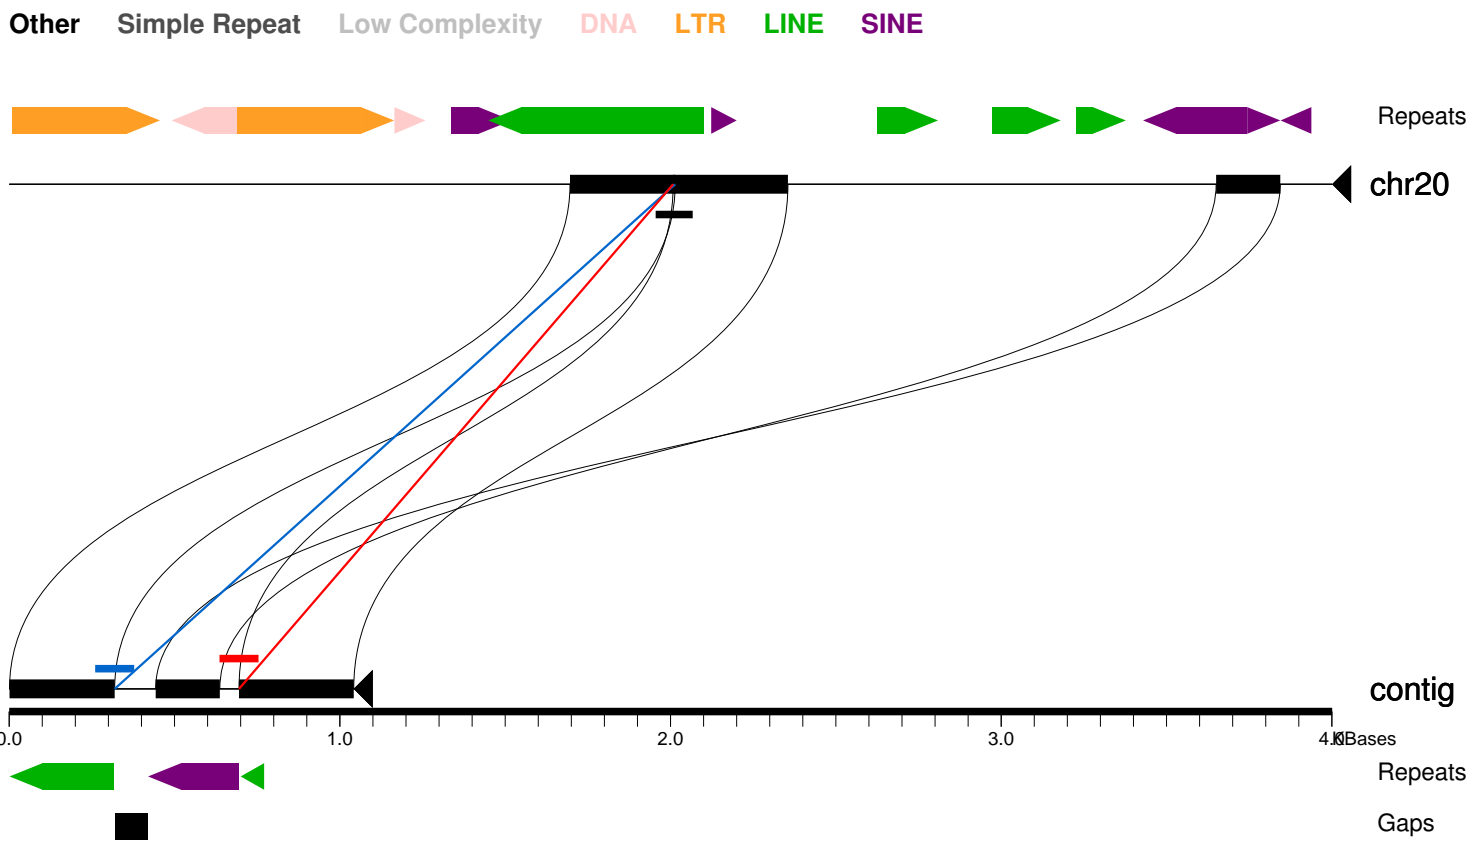

siteID: chr20\_26190947 Scafftig2 + Breakpoint: chr20:26190958

chr20:26190915-26191017

Overlap Length: 17 INS size: 424 Genotyped: No

```

left  AACAAATCTGAGGGTGAACACATTTGTTAAAAAGAG-----AGAGATTAAAAAGTTAAG
chrom AACAAATCTGAGGGTGAACACATTTGTTAAAAAGAG-----AGAGATTAAAAAGTTAAG
right NNNNNNNNNNNNNNNNNNNNNNNNNNNNNNNNNNNNNNNNNNNNNNNNNNNNNNNNNNNNNNNNN
      111111111111111111111111111111111111111111111111111111111111111
      *1*1*11*****
left  ATGCTGGGCCGGGCGCGGTGGCTCACGCCTGTAATCCCAGCACTTTGGGAGGCCGAGGCGGGCGG
chrom ATGCTGT-----TTGTACA-GTATATAA-CTGAACAAAGTTGTAT--CTAG-CAATTTG
right ATGCTGT-----TTGTACA-GTATATAA-CTGAACAAAGTTGTAT--CTAG-CAATTTG
      *****222222222222*2*22**2*22*2***2*22*2**222*2*2*222*2**2*22222*

```

Other Simple Repeat Low Complexity DNA LTR LINE SINE

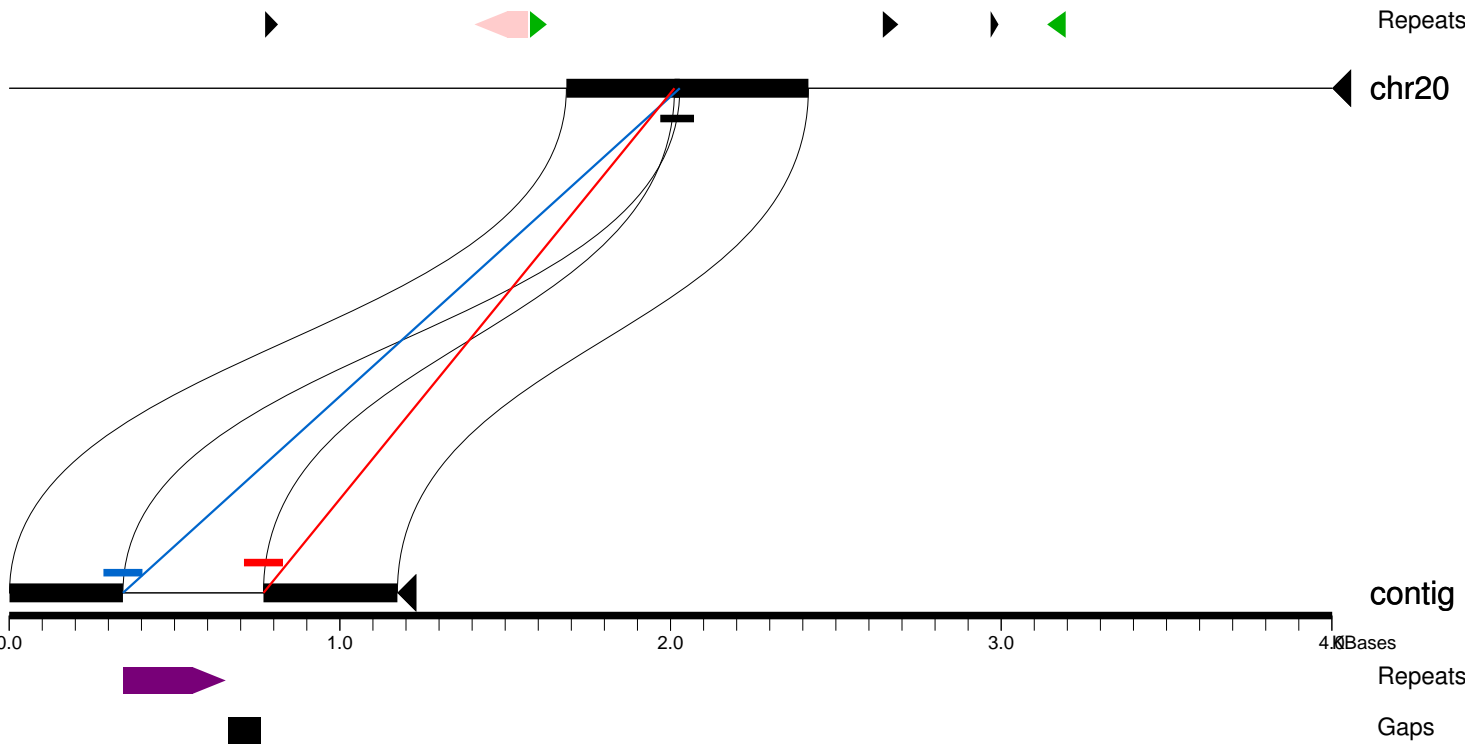

siteID: chr20\_30627737 Scafftig1 + Breakpoint: chr20:30627746

chr20:30627586-30627939

Overlap Length: 34 INS size: 249 Genotyped: Yes

```
left -----CTAATGCATGTGGGGCTTAAAAACCTAGATGAC-AGGTTGAT
chrom AAGGGGAGGGAGAGCATTAGGACAAATACCTAATGCATGTGGGGCTTAAAAACCTAGATGAC-AGGTTGAT
right C-----GGGAGA--AT-----GGCGTGAACCCGGGAGGCGGAGCTTGCA
N      222222  22          11111111111111***1*1**1**11**1*111**1***11
```

```
left GGGTGCAGCAAACCA-CCACGGCACATGTATACCTATGCAACAAACCTGCACGTTCTGCAAATGTATCTC
chrom GGGTGCAGCAAACCA-CCACGGCACATGTATACCTATGCAACAAACCTGCACGTTCTGCAAATGTATCCC
right GTGAGCCGAGATCCCGCCACTGCAC-TCCAG-CCTGGGCGACAGAGCGAGAC--TCCG-----TCTC
*1*1**1*11*1**11**1***1***1*11*11**11**1**1*1*111**11**1*11111111**N*
```

```
left AGAATTTAAAGTAAAAAGAAAAGAAAAGAAAAAACAATAGAAAAACACTTCCCGC-CT--TTGGGA
chrom AGAATTTAAAGTAAAAAGAAAAGAAAGAAAAGAAAAAACAATAGAAAAACACTTCCCGCACCAATTTCAA
right A-----A-----A-----A-----A-----A-----A-----A-----A-----
*111111111111111111111111***1*1***1***1***1*2*2**222**222*
```

```
left GG--CCGAGGCGGGCGGATCACAAGGTCAGG-----AGAT-CGAGACC---ATCCCGGC
chrom TGTTCCTTTCTTCTTCAGTGACAACCTCTGCTTCTTGTGGCTGTTTACTTCCAGACTTTTATCTACGC
right TGTTCCTTTCTTCTTCAGTGACAACCTCTGCTTCTTGTGGCTGTTTACTTCCAGACTTTTATCTACGC
2*22**2222*2222222*2***22*2*2222222222222222*2*2*2***2222***222**
```

```
left --TAAAT-----GGTGAA-----ACCCCGTCTCTACTAAAAATACAAA--AATTAGCCGGGCG
chrom ATTTACATACATGTAGAGGTAACACAAAACCATGTTATTTAAAAAAGGAATGTACTCTGCGATTCT
right ATTTACATACATGTAGAGGTAACACAAAACCATGTTATTTAAAAAAGGAATGTACTCTGCGAT---
22*2*2**22222222***2**222222***22*222**2*22***2*22**22*2*22**222N1N
```

```
left TAGTGG
chrom GAAAGA
right -----
N1NN1N
```

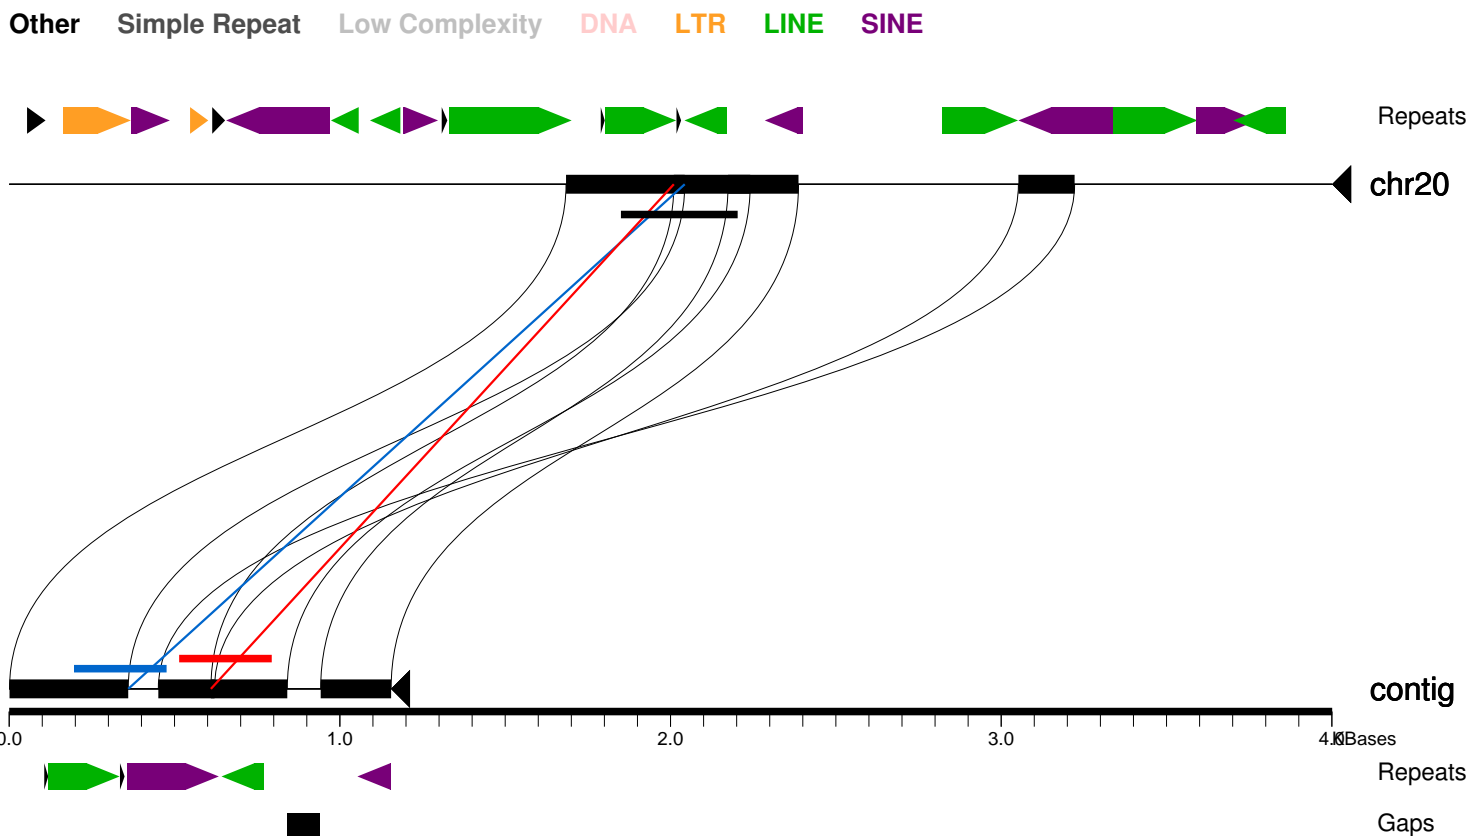



siteID: chr20\_33949043 Scaffitig5 - Breakpoint: chr20:33949029

chr20:33948987-33949088

Overlap Length: 18 INS size: 282 Genotyped: Yes

```
left  GGCTGAGCATAAGATTTTCATTTTT-AAAAAG---GACTCTG-CTGAT-----AAAAAGTTTGA
chrom GGCTGAGCATAAGATTTTCATTTTT-AAAAAG---GACTCTG-CTGAT-----A AAAAGTTTGA
right TGCAGTCCGCAGTCCGGCCTGGGCGACAAAGCGAGACTCCGTCTCAAAAAAAAAAAAAAAAAA AAAAGTTTGA
      1**1*11*11*111111*1*11111*1****111*****1*1**1*1111111111111******
```

```
left  AAACCA CGCCTGTA-ATCCCAGCACTTTGGGAGGCCGAGGCGGGTGGATC-ATGAGGTCAGGAGATCG
chrom AAACCA C-----TAGATCCCTCTACCT--GGA-----AGGCTTTTTCATCCACTCTTTCAC-----
right AAACCA C-----TAGATCCCTCTACCT--GGA-----AGGCTTTTTCATCCACTCTTTCAC-----
      *****22222**2*****222**2*22***22222*****222*22***2*22222***22222222
```

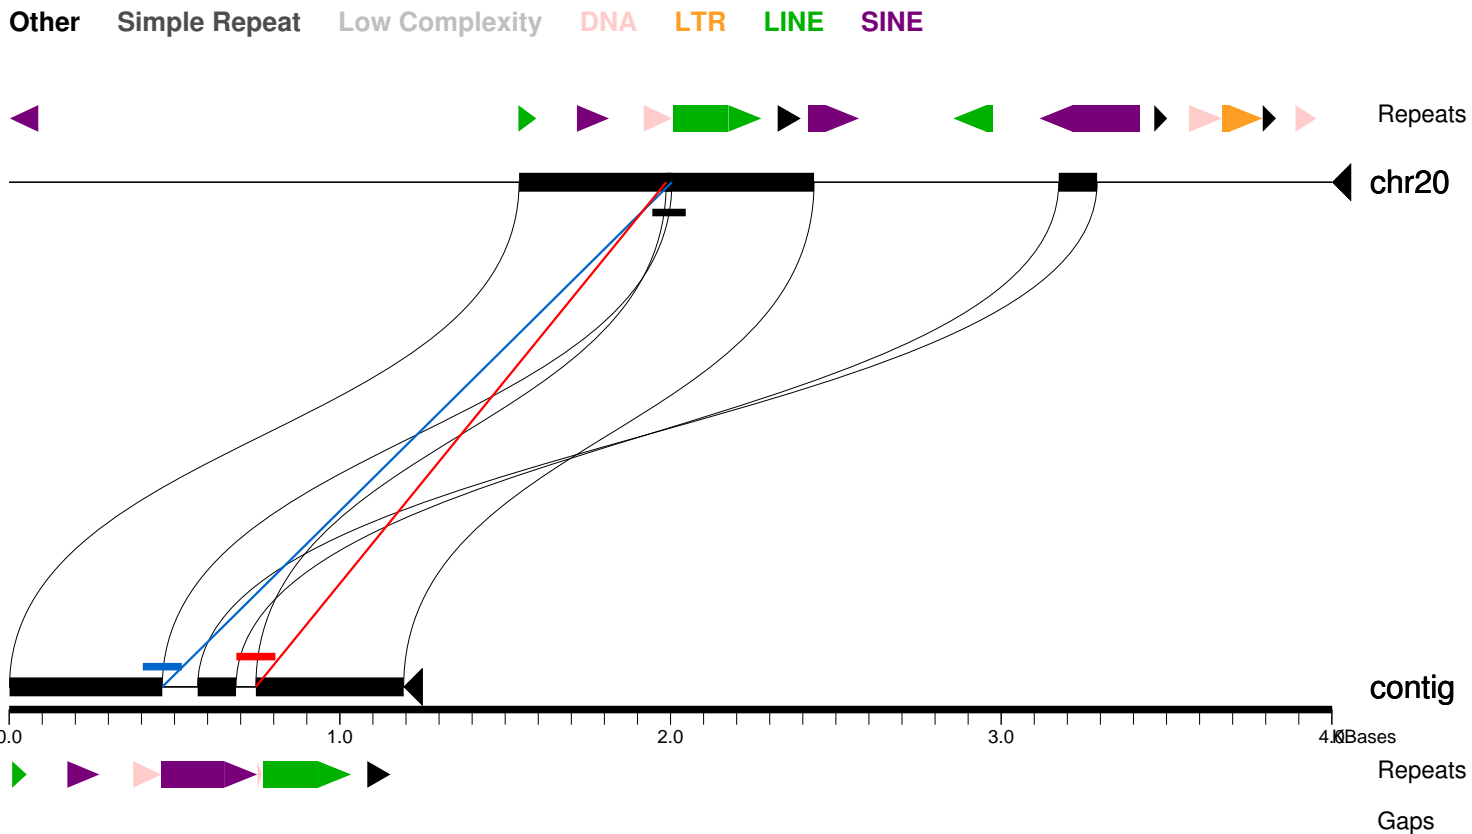



siteID: chr20\_38210664 Scafftig1 - Breakpoint: chr20:38210675

chr20:38210623-38210727

Overlap Length: 8 INS size: 303 Genotyped: Yes

```
left  ----AAGGAAG-CAGAAATCAGAGATATA--ACAGA---AGAAACTTTCCTGAGTAAAAAAA----CTGA
chrom ----AAGGAAG-CAGAAATCAGAGATATA--ACAGA---AGAAACTTTCCTGAGTAAAAAAA----CTGA
right CGCCACTGCAGTCCGCAGTCCGACCTGGGCGACAGAGCGAGACTCCGTCTCAAAAAAAAAAAAAAAAACTGA
      1111*11*1**1*1*1*1**1**11*11111*****111**11*11*11*11*****1111***

left  TTCGGGCCGGGCGCGGTGGCTCACGCCTGTA--ATCCCAGCACTTTGGGAGGCCGAGGCGGGTGG
chrom TTCAT-----GGAAACACCACCATGTGCCATAG-AGCATTCATGAATACAAAG-----
right TTCCAT-----GGAAACACCACCATGTGCCATAG-AGCATTCATGAATACAAAG-----
      ***2222222222**222*2*222*2***222**222***2*222*2*22*22***2222222
```

Other Simple Repeat Low Complexity DNA LTR LINE SINE

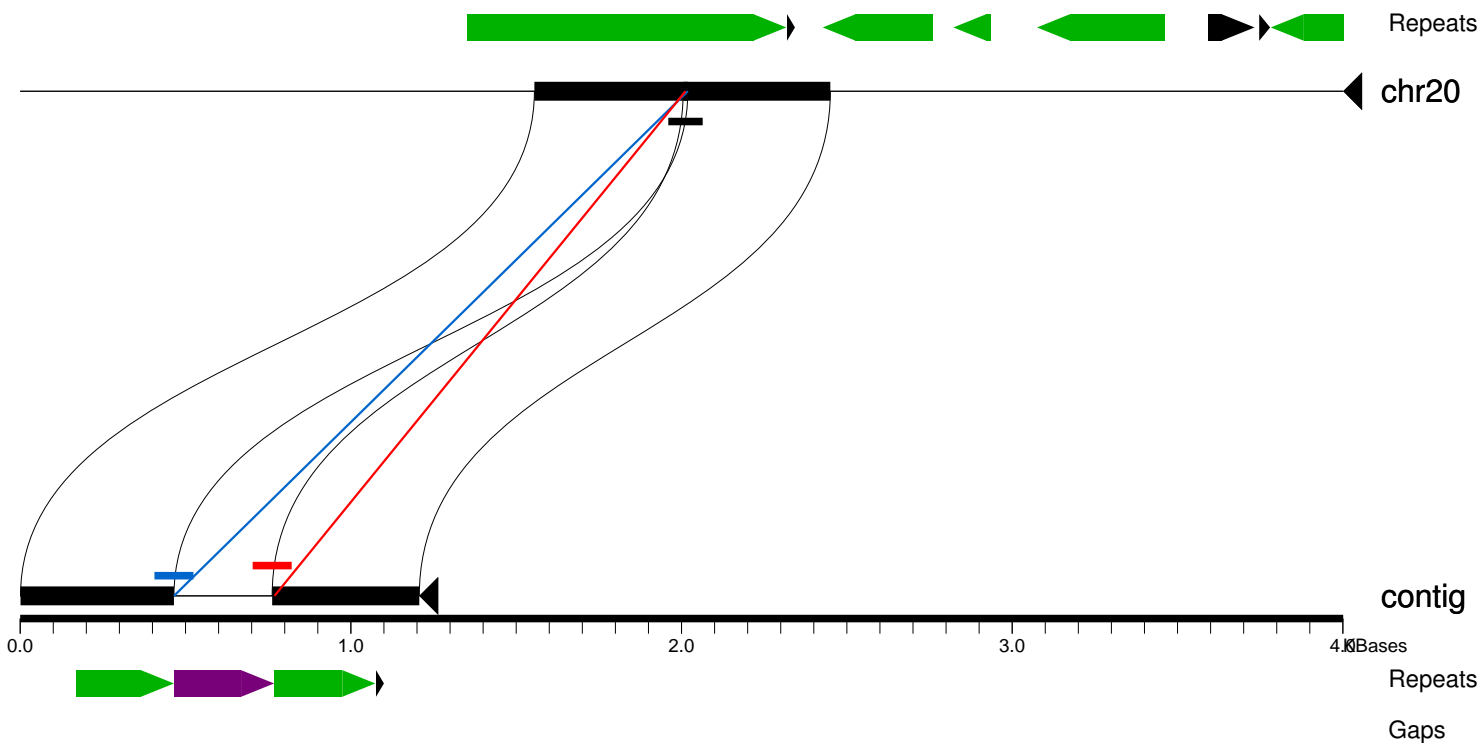

siteID: chr20\_38301649 Scafftig2 - Breakpoint: chr20:38301641

chr20:38301588-38301700

Overlap Length: 7 INS size: 416 Genotyped: No

```
left   CTG---GGTAAGACCAGCAGAAAGGTATTAGGTT---GGTGCGAAAGAAACTGCAGTTTTTCGCAATTTNNNN
chrom  CTG---GGTAAGACCAGCAGAAAGGTATTAGGTT---GGTGCGAAAGAAACTGCAGTTTTTCGCAATTTACTT
right  CCGCCCGCCTCGGCCTCCCAAAGTGCTGGGATTACAGGCGTGAGCCACCGCGCCCGGCCCGCAATTACTT
      *1*111*1111*1**11*11***111*11*1**111**1*1**111*1111**111111******2222
```

```
left   NNNNNNNNNNNNNNNNNNNNNNNNNNNNNNNNNNNNNNNNNNNNNNNNNNNNNNNNNNNNNNNNNNNNNNNNN
chrom  TCAATGGCAAAAACCACGATAACTTTTGCACGAACCTACCAACCTAATA-----
right  TCAATGGCAAAAACCACGATAACTTTTGCACGAACCTACCAACCTAATA-----
      22222222222222222222222222222222222222222222222222222222222222222222
```

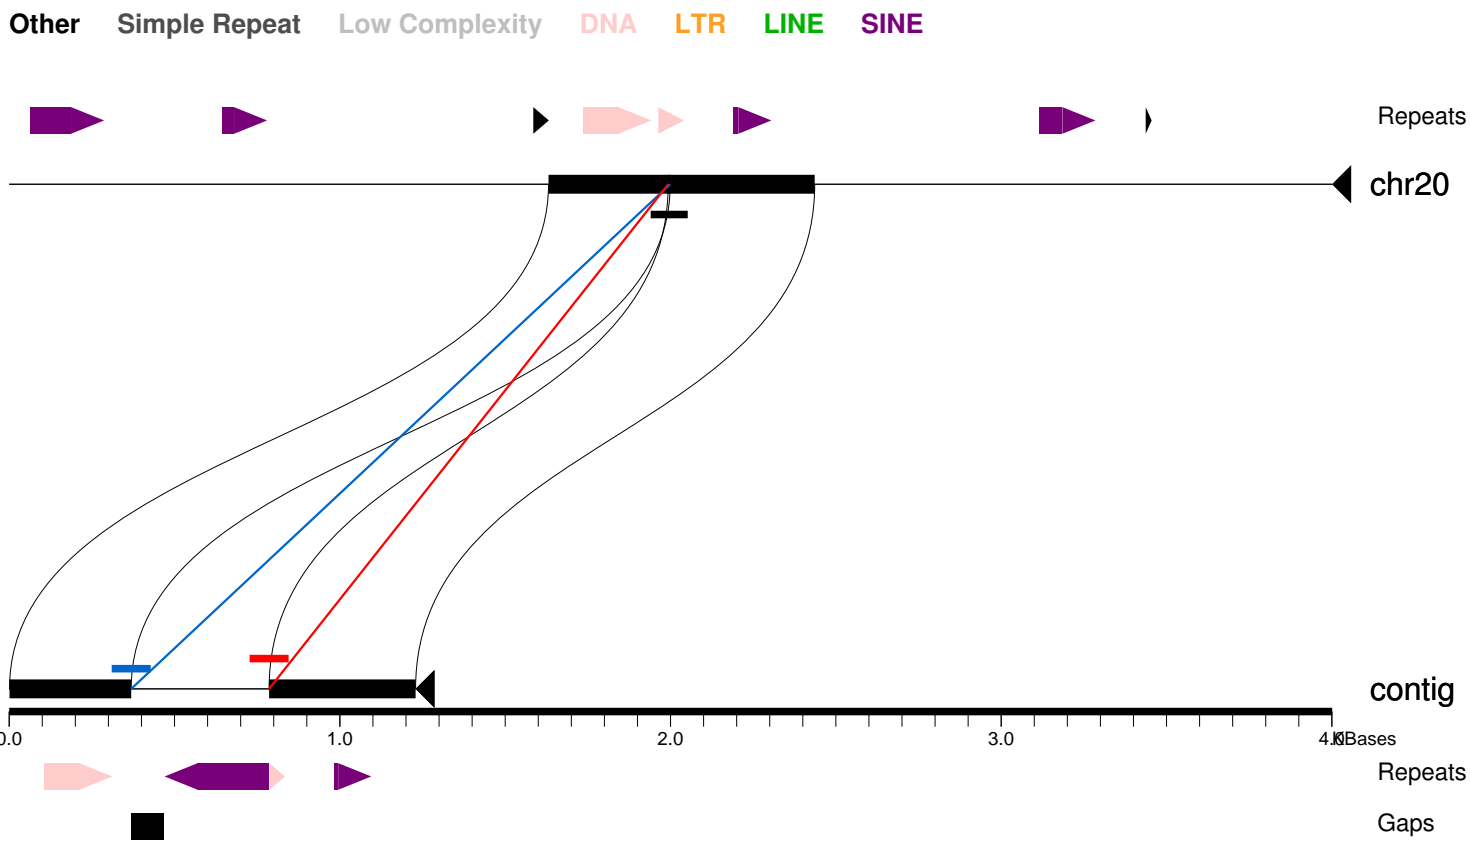





siteID: chr20\_52725213 Scafftig2 - Breakpoint: chr20:52725223

chr20:52725063-52725384

Overlap Length: 2 INS size: 310 Genotyped: Yes

```
left  --CCAAACCCCTGTTAACCTACATTTTATTTCTTCATTTTATGAGTTTGACTGTTTAGCTAGCTCTTATAA
chrom TTCCAAACCCCTGTTAACCTACATTTTATTTCTTCATTTTATGAGTTTGACTGTTTAGCTAGCTCTTATAA
right TTTA-----GTAGAG--ACGGGGT-TTCACCGTTTT-----AGCCGGGATGGT---CTCGATCT-----
      221111111111**11*111**1111*1***11*1****1111**111*11**1*111**1*1***11111
```

```
left  GTGGAAACATGCAGTGTGTTGTCCTTCTGTGACTGGCTTGTTTCACTTGATGTAATGTTTTCAGGTTTAT
chrom GTGGAAACATGCAGTGTGTTGTCCTTCTGTGACTGGCTTGTTTCACTTGATGTAATGTTTTCAGGTTTAT
right -----CCTGACCTCGTGATCCGCCCGCTCGGCCT-----CCCAAAGTGCTGGGATTACAGGCGTGAG
      11111111*1**111*11*11***11*1*111*1*1**111111*1*1111**1111*1**1**1*11*1*1
```

```
left  TCATGTTATCACATATTTTCAGGTTTTTTTTTTTTTTT-----TTTTTTT---TTTTTTTTGAG---
chrom TCATGTTATCACATATTTTCAGGATTTTCTTCTTTTTTAAAGGCTGAATTATATTTCCGTTGTATGTGTGTGC
right CCAC-----CGCGCCCGGCCGATTTTCTTCTTTTTTAAAGGCTGAATTATATTTCCGTTGTATGTGTGTGC
      1**1111111*1*1111111*1*2***22**2*****2222222222**2*2**222**2*2*2**2*222
```

```
left  -----ACGGAGTCTCGCTCT----GT-CGCCAGGC--TGGAGTGCAG-TGGCGGGATCTCGGC-----
chrom ATGTCTATGGAATATAAATTATACATGTACACACATACAATGGAATATATATATATATATATATATATATAT
right ATGTCTATGGAATATAAATTATACATGTACACACATACAATGGAATATATATATATATATATATATATATAT
      222222*2***2*2*222*2*2222**2*2*2**22*22*****2*22*22*222222**2*NN*222222
```

```
left  --TCAC---TGCAAGCTCCGCCCTCCCGGTTTCACGCCATTCTC
chrom TATCACATTTACTTTATCCATTTACCCT-TTGATGGATATTTA
right TATCACATTTACTTTATCCATTTACCCT-TTGATGGATATTTA
      22****222*2*2222**222*2**222*2*2*2222*2*2
```

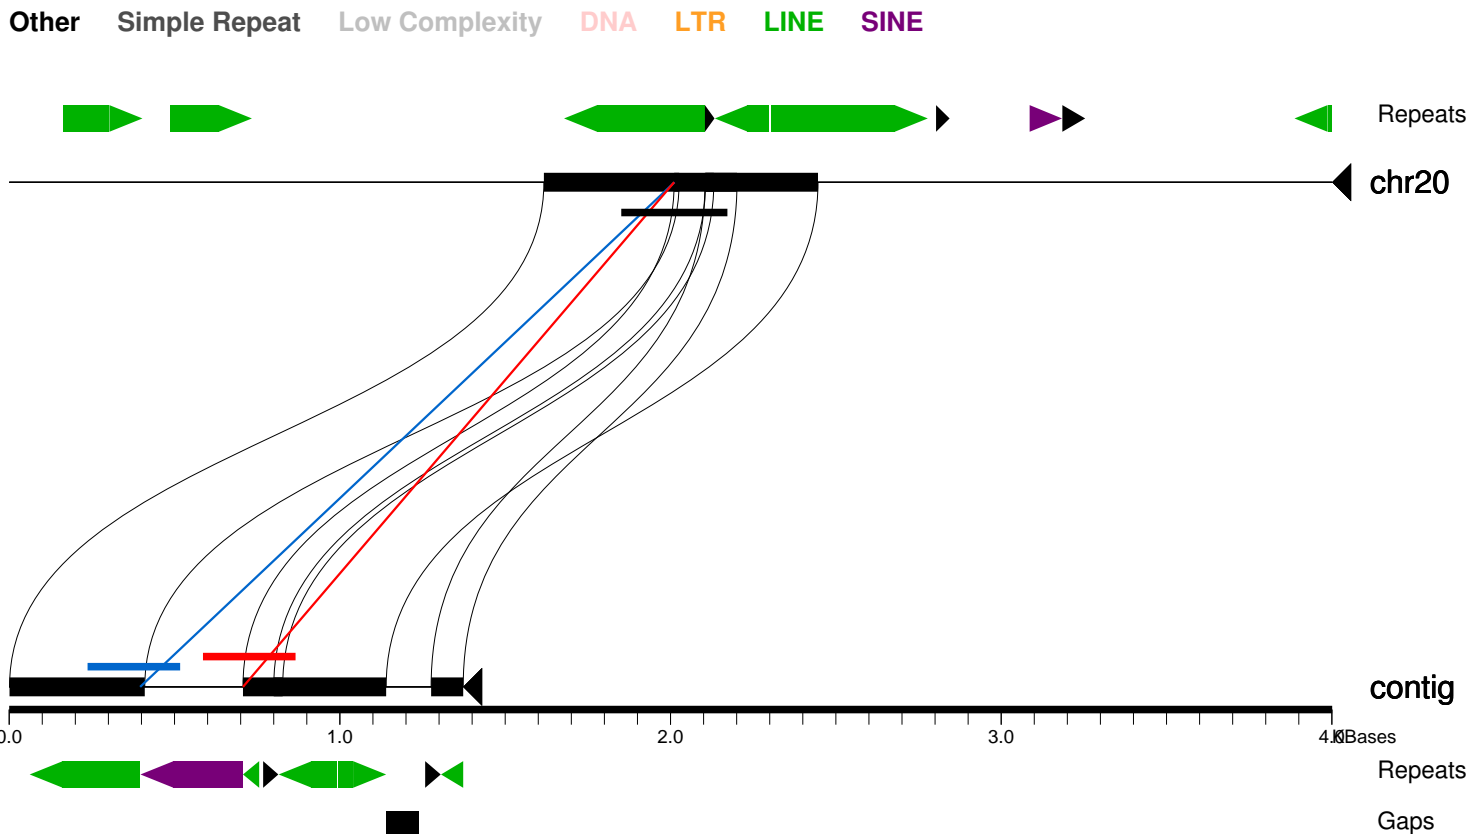

siteID: chr20\_53761848 Scafftig7 - Breakpoint: chr20:53761842

chr20:53761791-53761901

Overlap Length: 9 INS size: 307 Genotyped: Yes

```
left  A--ATTC----CTACAGT---TAATGCCTTATTAAATAGCTACATATATATGGAAGTATGAAAAATTTTCG
chrom A--ATTC----CTACAGT---TAATGCCTTATTAAATAGCTACATATATATGGAAGTATGAAAAATTTTC-
right TCCAGCCTGGGCGACAGAGCGAGACTCCGTCTCAAAAAAAAAAAAAAAAAAAAAAAAAAAAAAAAA-AAAAATTTTC-
      111*11*1111*1****111111*11**1*1*1***1*111*1*1*1*1*111**11*11*****2

left  GCCGGGCGCGGTGGCTCACGCCTGTAATCCCAGCACTTTGGGAGGCCGAGGCGGGCGG
chrom -----CAAGATTGCAAAGTAATCAAAAACCCAGATTAAATCAAGGATGATTTTATAT-
right -----CAAGATTGCAAAGTAATCAAAAACCCAGATTAAATCAAGGATGATTTTATAT-
      222222*22*2*2**22*2222*22**2*****222222222***22**222222222
```

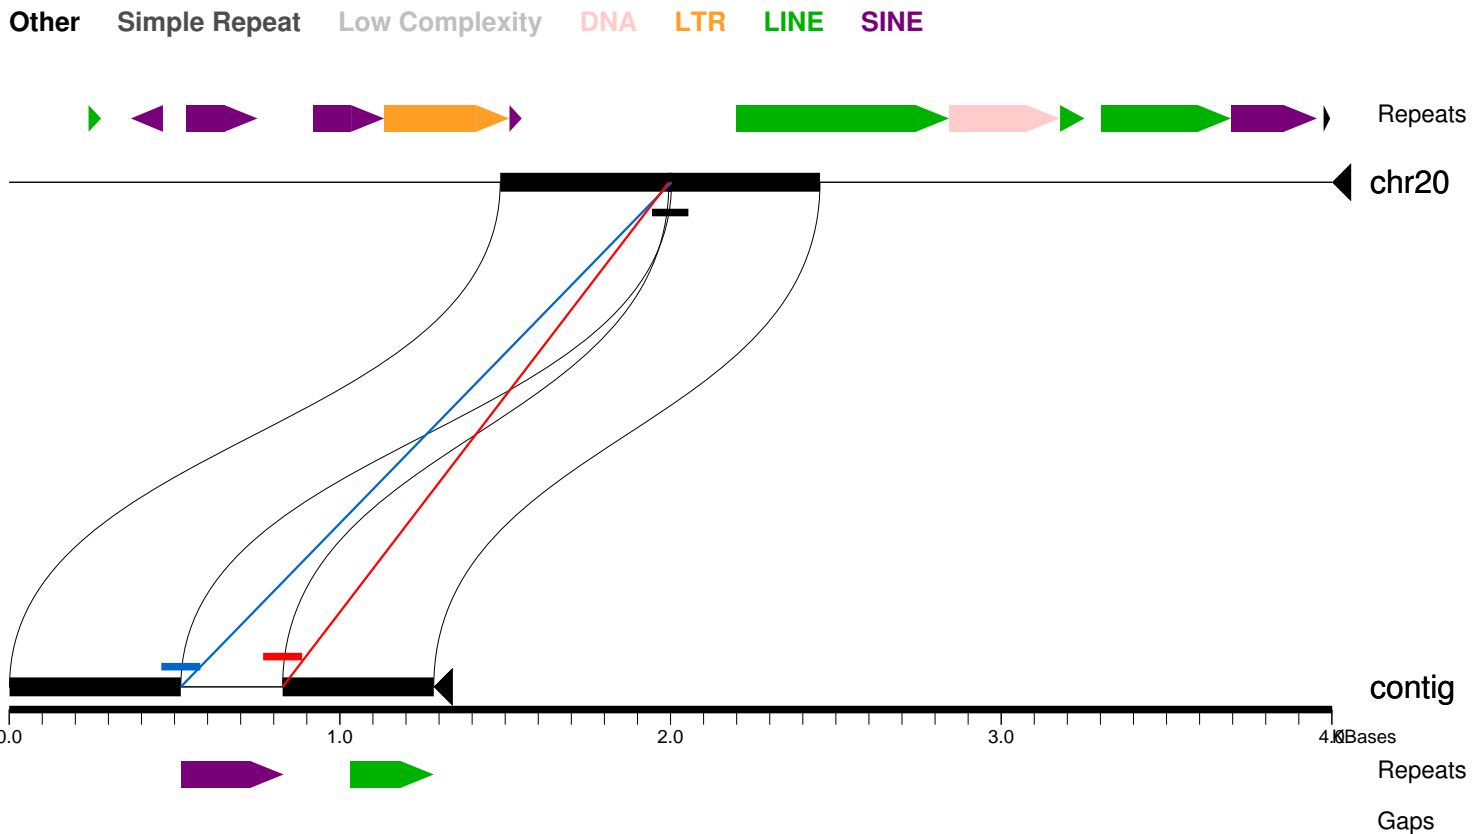





siteID: chr20\_8443491 Scaffitig1 + Breakpoint: chr20:8443470

chr20:8443426-8443529

Overlap Length: 16 INS size: 318 Genotyped: Yes

```
left  ATGCCTTGCCCCTTGCTTTCTCCA-----CAATA-AGGC-TTAGACGCAA-----AACACTTC
chrom ATGCCTTGCCCCTTGCTTTCTCCA-----CAATA-AGGC-TTAGACGCAA-----AACACTTC
right CCGCC---CGCCTCGGCCTCCCAAAGTGCTGGGATTACAGGCCTGAGCCACCGCGCCCGGCCAACACTTC
      11***111*1***1*111***111*11111111*1**1***1*1**1*1*1111111111*****
```

  

```
left  TTTTCCCTTTTTTTTTTTTTTTCTTTTCTTTTTTTTTTTTTTTTTTTTGGAGAC--GGAG-TCTCGCTCTGTCG
chrom GTTTTCCCTGATCACCACCTCAGGCATGA-----GAGACCAGGTGATCTATGGCTGGCC
right GTTTTCCCTGATCACCACCTCAGGCATGA-----GAGACCAGGTGATCTATGGCTGGCC
      2*****22*222222*2222*2*2222222222222222222*****22**2*2***2222***2*2
```

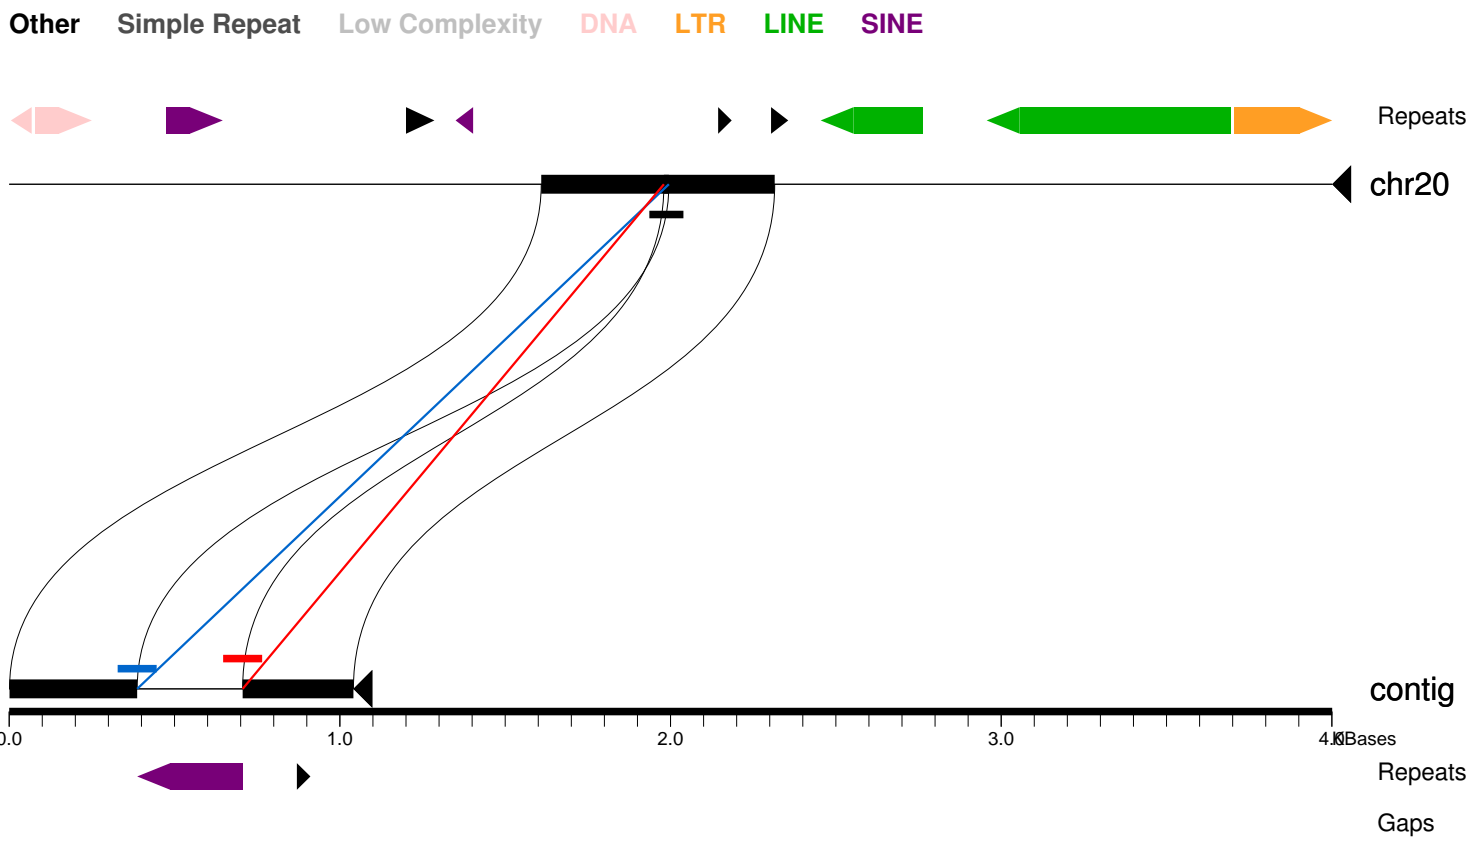

siteID: chr20\_8521287 Scaffitg3 - Breakpoint: chr20:8521293

chr20:8521245-8521349

Overlap Length: 12 INS size: 327 Genotyped: Yes

```
left   TCCCTCC-----CATCTTTCAAATTACTCCACATGTCTAAGTTTTCCTTTAAA--ATGTTTCC
chrom  TCCCTCC-----CATCTTTCAAATTACTCCACATGTCTAAGTTTTCCTTTAAA--ATGTTTCC
right  GGGCGACAGAGCGAGACTCCGTCTCAAAAAAAAAAAAAAAAAAAAAAAAAAAAAAAAAAATGTTTCC
      111*11*1111111111111*1***111***11*1111*1*11111**1111111111***11*****
left   AAACGGCCGGGCGCGGTGGCTCACGCCTGTAATCCCAG---CACTTTGGGAGGCCGAGGCGGGTGG
chrom  AAACAC-----TGGAGCACACCTCTCATCACAGACCCCATTTG-----ATGAGAGACA
right  AAACCAC-----TGGAGCACACCTCTCATCACAGACCCCATTTG-----ATGAGAGACA
      ***22*222222222***22***2***2*2***2***222*2*2***22222222*2*2*2*222
```

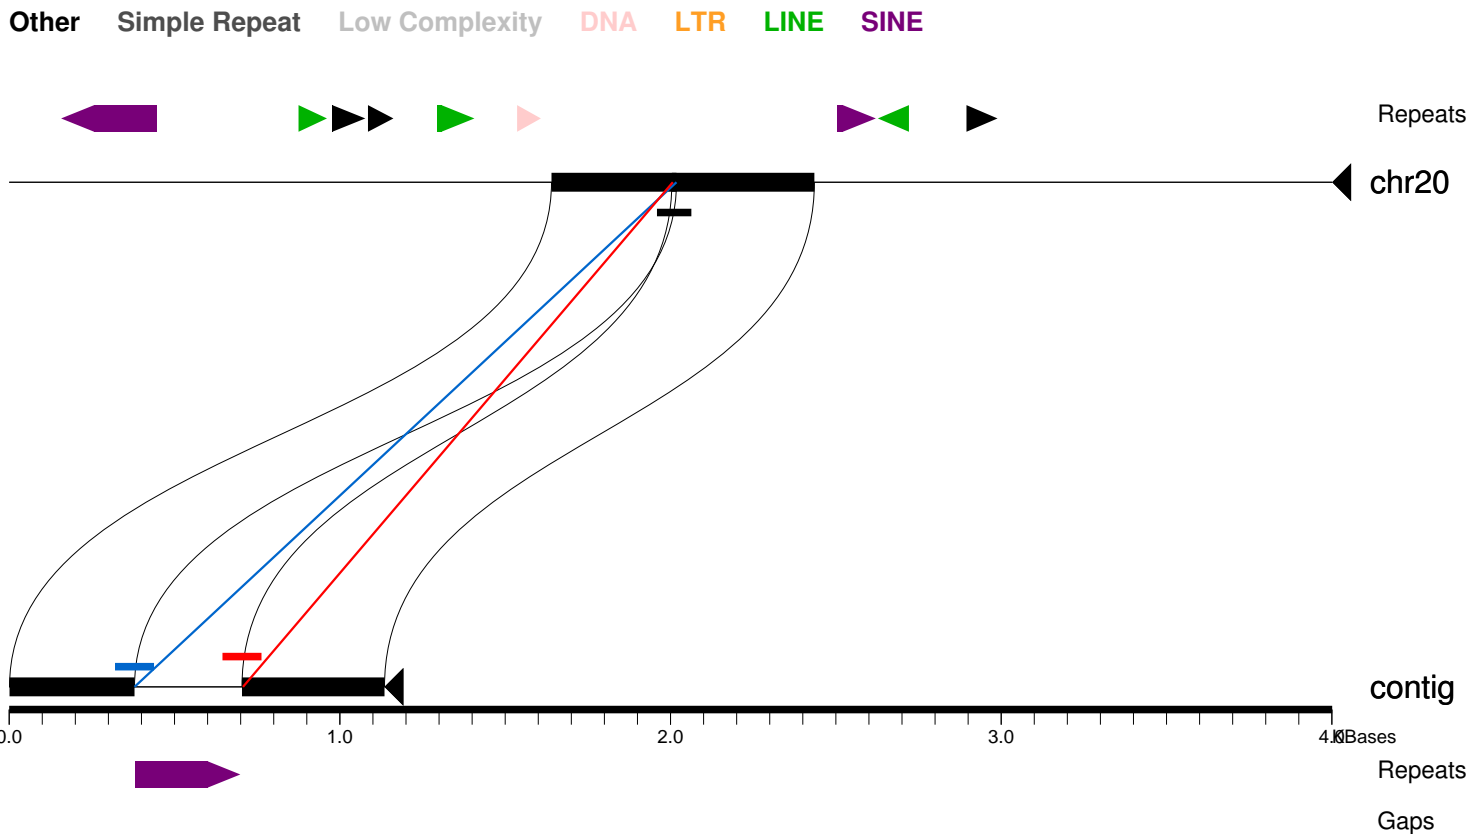

siteID: chr20\_8670606 Scafftig8 + Breakpoint: chr20:8670604

chr20:8670558-8670660

Overlap Length: 14 INS size: 291 Genotyped: Yes

```
left AAAGAAAAGGGTTTACCTT-----TTTATGAAGAAAAG-----AACTCTAATAGCTGTCTCCAA
chrom AAAGAAAAGGGTTTACCTT-----TTTATGAAGAAAAG-----AACTCTAATAGCTGTCTCCAA
right GATCCACCCGCCTCGGCCTCCCAAAGTGCTGGGATTACAGGCGTGAGCCACCGCGCCCGGCCTCTCCAA
1*111*111*11*111*1*1111111*11*11**11*1**11111111*1*1*11111**1*****
```

```
left ATTTCTTTTTTTTTTTTTTTTTTTTTTTTTTTGAGACGGAGTCTCGTTCTGTGCGCCAGGCGGGAGTGC
chrom ATTTCTGTACAATGGTTTTGTATCA-----ACACCATCTGATTCATATACCTCG-----
right ATTTCTGTACAATGGTTTTGTATCA-----ACACCATCTGATTCATATACCTCG-----
*****2*2222*22*****2*2*22222222**2222***22***22222*22*2222222222
```

Other Simple Repeat Low Complexity DNA LTR LINE SINE

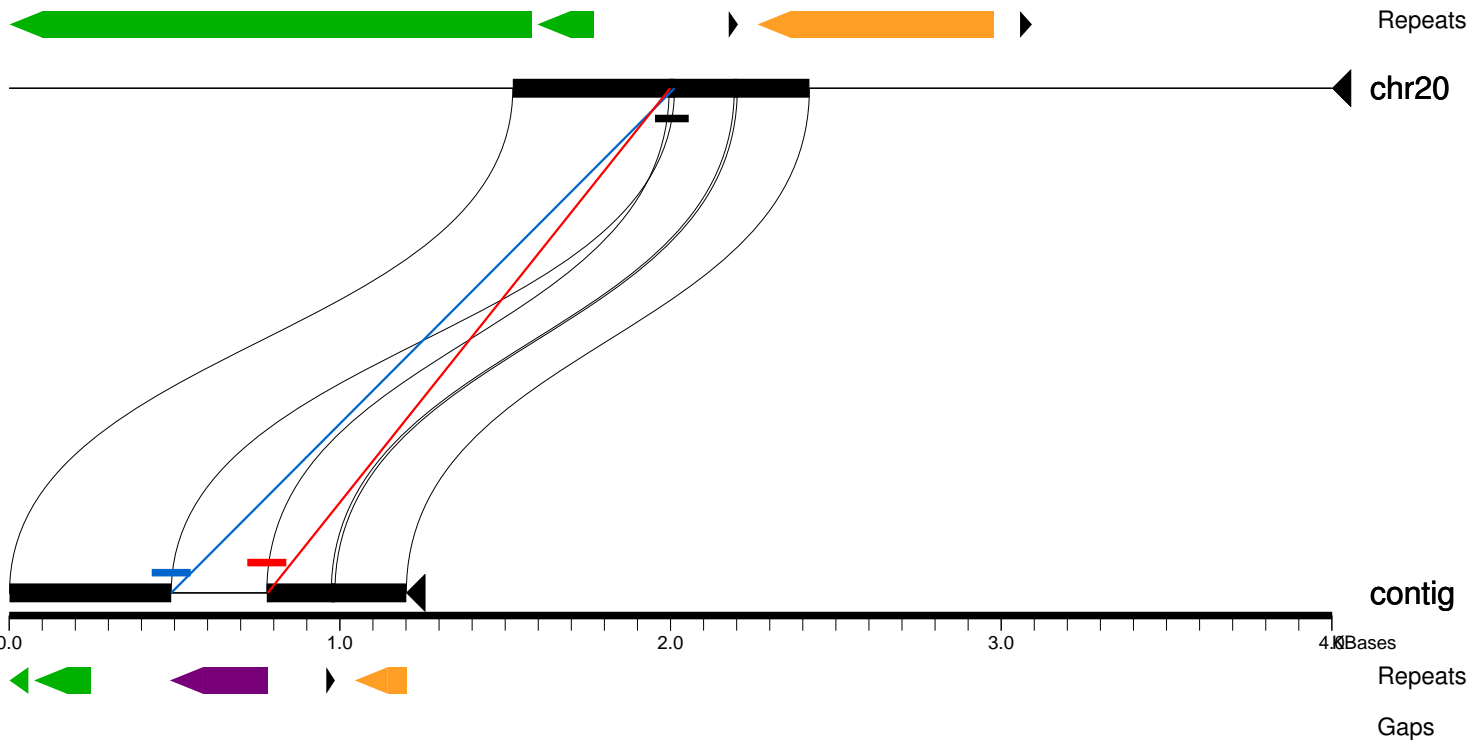

siteID: chr20\_8816507 Scaffitg1 + Breakpoint: chr20:8816492  
 chr20:8815956-8816652  
 Overlap Length: 13 INS size: 288 Genotyped: Yes

```

left chrom  -----
right      GGCTTGATAGACCATGGACATGGCTTTTTGTCTGCTTTTGGTTATTTTGTTTAGACCTATTTTCAGGGTCTC
      --CTTG-----GGA--GGCTG-----AGGC-----
      2222           222  2222N            22N2
  
```

```

left chrom  -----
right      CACCGTTGTACATTTCTTTCTTTTTTAAGAGTATTTTTTTTTTTCTGGTTATAACCATGAAACCTTATTTTT
      -----AGGAGAAAT-----GG-----CGTGAACCC-----
      2N222N22                22      2N2222N22
  
```

```

left chrom  -----
right      AAGTCCCTAACCACAGGCTTTAGAGATCTATGCTGTATAAAAAAGTAATTCATCCAATTTCTATTATGACTT
      -----GG-----GAG-----GCGG-----
      22      222      22N2
  
```

```

left chrom  -----
right      ATATATAGCAATCTACTCATTTATGAAAACAAAGAATTCAGGCATATCTTGTTTTTACTAGCCTGTCTGA
      -----AGC-----TTGCAG-----
      222      22N222
  
```

```

left chrom  -----
right      GTATTGTGGTTCGAATTCATTTGTGGACTCTTTGAGTAGGGCTGTCTGTCTATAATGACAATGCATATACA
      -----TGAGCCG-----
      2222NN2
  
```

```

left chrom  -----
right      TGTAGAACCGCTTATGAGAGTTTATGTTTTTATAAACTGCATAATAGATTTTAAAAGTTTCTCCATACATA
      ---AGATCCCGCC-----ACTGCA-----CTCCAG-----
      222N22N22N           2222*11111111111111111111111111111111111111111111111111111
  
```

```

left chrom  -----
right      TTTTCATGATTCCACCTCAGAGGGCACAGGAAATGGTCCAAAGCAGACGACTCTAACTTAAAATGACTGA
      TTTTCATGATTCCACCTCAGAGGGCACAGGAAATGGTCCAAAGCAGACGACTCTAACTTAAAATGACTGA
      ---CCT-----GGG-----GA-----CAGAGC-GA-GACTCCGTCTCAAAA-----
      1111111111111111111111111111111111111111111111111111111111111111111111111111111111111
  
```

```

left chrom  -----
right      CAAGGCATCTGGGTTCAGTGAGCTTTGGCTGCATAACAAAACCACTTCAAAACTTAGTGACGG-----CCGG
      CAAGGCATCTGGGTTCAGTGAGCTTTGGCTGCATAACAAAACCACTTCAAAACCTTAGTGACTTGAAAAACAAA
      -----AAA-----AAAACCTTAGTGACTTGAAAAACAAA
      1111111111111111111111111111111111111111111111111111111111111111111111111111111111111
  
```

```

left chrom  -----
right      GCGCGGTGGC-----TCACGCCTGTAA-----TCCAGCACTTTGGGAG-GCCGAGGCGGGCGGATCACGA
      TCACTGTTGAGACAATAAC-CATGTTACTGCTCACAAGTCTATGGGTCAGCTGAACCTTTCTGCTG-CTT
      TCACTGTTGAGACAATAAC-CATGTTACTGCTCACAAGTCTATGGGTCAGCTGAACCTTTCTGCTG-CTT
      2*2*22*2*222222*2**2*2**2*2222*2**222*2***222*2**22*222*2*2*22*22
  
```

```

left chrom  -----
right      SNTGAGGAG --ATCGAGACCAATCCCGGCCTAA--LTR--LINE--SINECCCCGTC--TCTACTAAA-
      TGCCTTGGGCTTCATTGATCCAGCTGGTCTTAGGCAGGTATCTGTGTTTCAGCTAGCAGATCAACTGAA-
      TGCCCTTGGGCTTCATTGATCCAGCTGGTCTTAGGCAGGTATCTGTGTTTCAGCTAGCAGATCAACTGAA-
      2*2*22*2*222222*2**22*2**22*2**2*2222222*2*2***22222*222*222*2**2***2*2*1
  
```

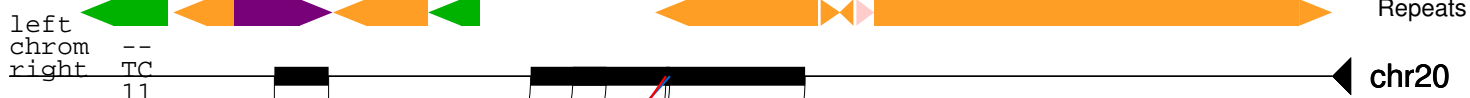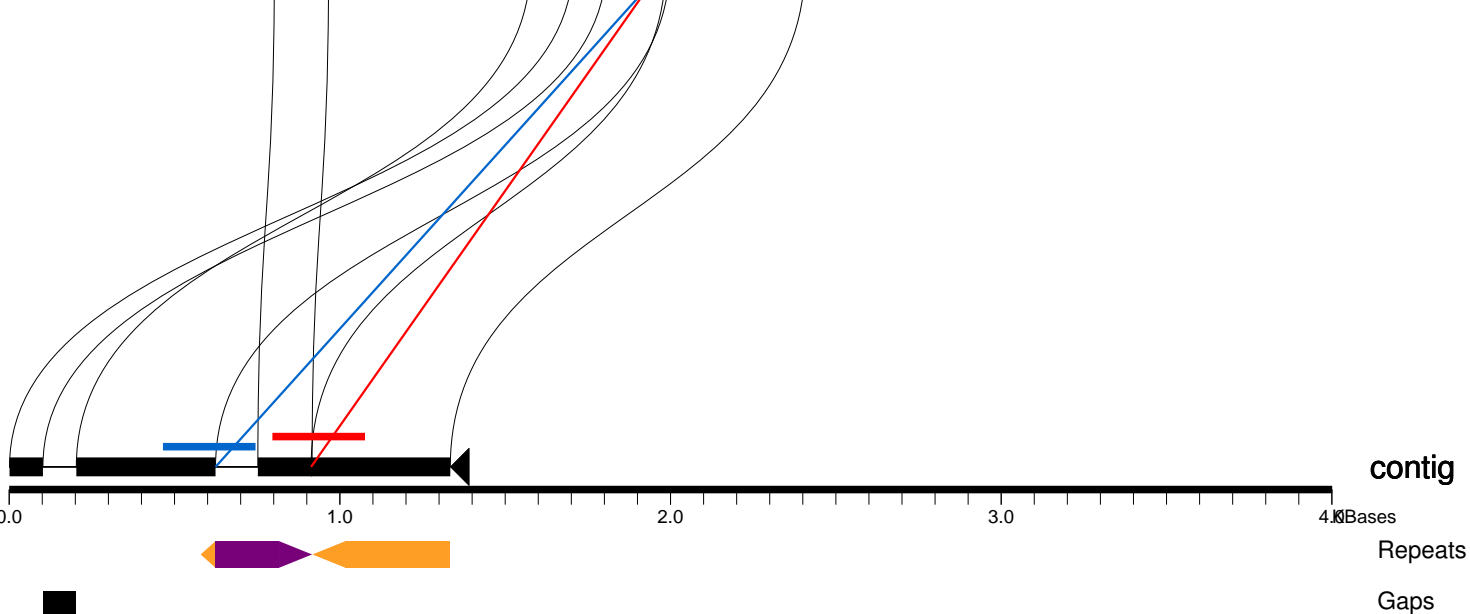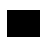



siteID: chr20\_9605197 Scaffoldig3 - Breakpoint: chr20:9605198

chr20:9605147-9605257

Overlap Length: 9 INS size: 314 Genotyped: Yes

```
left      T-----AGAAATATTATAAAGGTAACAGAAATTTCTTCCAACCTTATCTGTTTTCTTGAAATTAAGGGG
chrom     T-----AGAAATATTATAAAGGTAACAGAAATTTCTTCCAACCTTATCTGTTTTCTTAAATTAAGGTT
right    CTGGGCGACAGAGCGAGACTCCGTCTCAAAAAAAAAAAAAAAAAAAAAAAAAAAAAAAAAAAGAAATTAAGGTT
          1111111111***111*111*11111*1*1*1**111111111**111*11111111111N*****22
```

```
left      GCCGGGCGCGGTGGCTCACGCCTGTAATCCCAGCACTTTGGGAGGCCGAGGCGGGCG
chrom     CATGTTTTTC---TCCTTACCTCTCTG-TCTTAT-AATGTGCTAGTG---TTCCCATTT
right    CATGTTTTTC---TCCTTACCTCTCTG-TCTTAT-AATGTGCTAGTG---TTCCCATTT
          222*2222*22222**2**22**2*22**22*22*2*2**22**2222222*22222
```

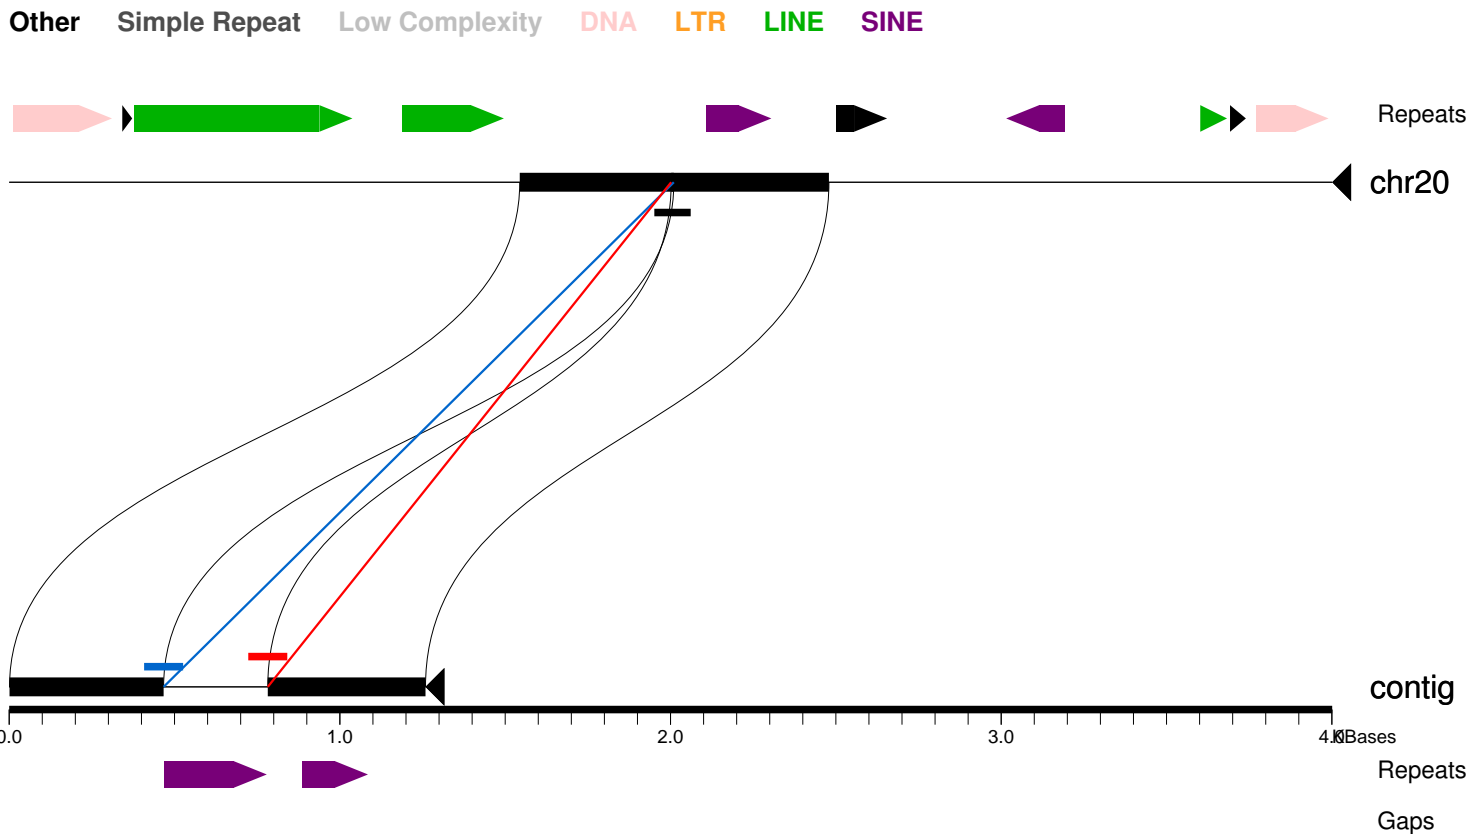

siteID: chr20\_9640987 Scaffitig4 - Breakpoint: chr20:9640971

chr20:9640924-9641027

Overlap Length: 9 INS size: 281 Genotyped: Yes

```
left    ---AGTGACA-AGTGATTTGCATTCC-----AAGCAAAAATCTGTGGTAGATTAAGATTATTTT
chrom   ---AGTGACA-AGTGATTTGCATTCC-----AAGCAAAAATCTGTGGTAGATTAAGATTATTTT
right   CTGGGCGACAGAGCGAGACTCCGTCTCAAAAAAAAAAAAAAAAAAAAAAAAAAAAAAAAAAAATTATTTT
        1111*1****1**1**1111*11**111111111111**11*****11111111*1*11**1*****
```

```
left    ACTTTGGGAGGCCGAGGCGGGCGGATCACGAGGTCAAGAGATCGAGACCATCCCGGCTAAAACG
chrom   AATTT-----TCTCTCCTTTC---TCTCTTCCCTTAGGGCTCTCT-CCATCTTTTCTT-----
right   AATTT-----TCTCTCCTTTC---TCTCTTCCCTTAGGGCTCTCT-CCATCTTTTCTT-----
        *2***2222222*2222*222*222**2*2222222**2*2**2222*****2222**222222
```

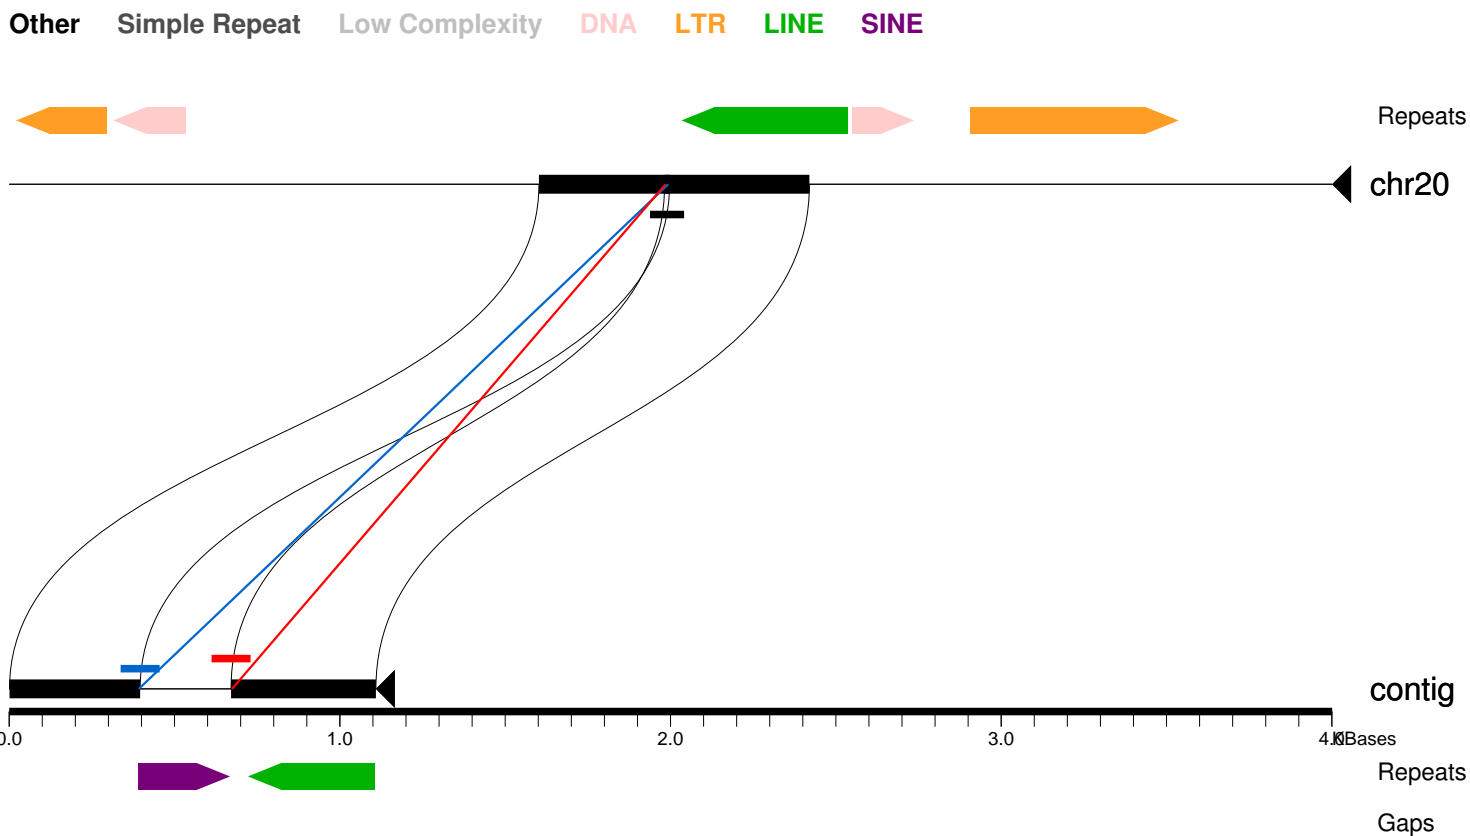



siteID: chr21\_10967225 Scafftig1 + Breakpoint: chr21:10967206

chr21:10967046-10967380

Overlap Length: 15 INS size: 301 Genotyped: Yes

left -----CCTCAAAATGTGTATGTCAATGATTTGGAATCTACTATTAATATATCATTTTTTTCCTAG  
chrom ACTGGCTGAATCCTCAAAATGTGTATGTCAATGATTTGGAATCTACTATTAATATATCATTTTTTTCCTAG  
right TTTAGTAGA-----GACGGGGTTTCACCGTTTTAGCCGGGATGGTCTC-----  
NN2N2NN22 11111111111111111111\*\*111\*\*11\*\*11\*\*11\*\*1\*111111\*\*11\*1\*\*1111

left AAGAAAACCTTATATTATGTAAAGGTGCTCCTGGGCCTTAACAAACAAACTAATGA-ATCACAATTTAAG  
chrom AAGAAAACCTTATATTATGTAAAGGTGCTCCTGGGCCTTAACAAACAAACTAATGA-ATCACAATTTAAG  
right --GATCTCCTGACCTCGTG-ATCCGCCCCGCTCGGCCTCC-----CAAAGTGCTGGGATTACAGGC---G  
11\*\*111\*\*1\*\*11\*11\*\*1\*111\*11\*1\*\*\*1\*\*\*1111111\*\*\*1\*11\*\*11\*\*1\*\*\*1111111\*

left TGCAGTTCGTATTACTTTCATTTGTGAATGAATTT-----TTTTTTTTTTTTTTTTTTGAGAC  
chrom TGCAGTTCGTATTACTTTCATTTGTGAATGAATTTTACCAATCTTAATATATGCCTCTCTTCTTTCTCTC  
right TGAGCCACCGCGCCCGGCC--TGTGAATGAATTTTACCAATCTTAATATATGCCTCTCTTCTTTCTCTC  
\*\*111111\*1\*11111111\*11\*\*\*\*\*5\*\*\*\*\*2222222222\*2\*2\*222\*2\*2\*2\*\*\*2222\*

left GGAGTCTCGTCTGTTCGCCCCAGGCTGGAGTGCAGTGGCGGG-AT--CTCGGCTCACTGCAA-----GCTCC  
chrom CGTATTTTGAAATTTTCAACCCATCATTGATGACTCTACCACACATTAATCTTTTAAATTCAATGAGGTAAT  
right CGTATTTTGAAATTTTCAACCCATCATTGATGACTCTACCACACATTAATCTTTTAAATTCAATGAGGTAAT  
2\*22\*2\*2\*222\*2\*\*2\*\*\*222\*2\*\*222\*22\*22\*2222\*\*22\*\*\*222\*2\*2\*2\*\*\*2222\*2222

left GCCTCCCGGGTTC-----CGCCA----TTCTCCT-GCCTC---  
chrom AGCTAAAGGATTAAAAATGAACATAGCAAGACTCCACATGTTATCCTAGACTTAAAT  
right AGCTAAAGGATTAAAAATGAACATAGCAAGACTCCACATGT-----  
22\*222\*2\*\*2\*222222222222222\*2\*\*\*2222\*1N1111 1N11N

Other Simple Repeat Low Complexity DNA LTR LINE SINE

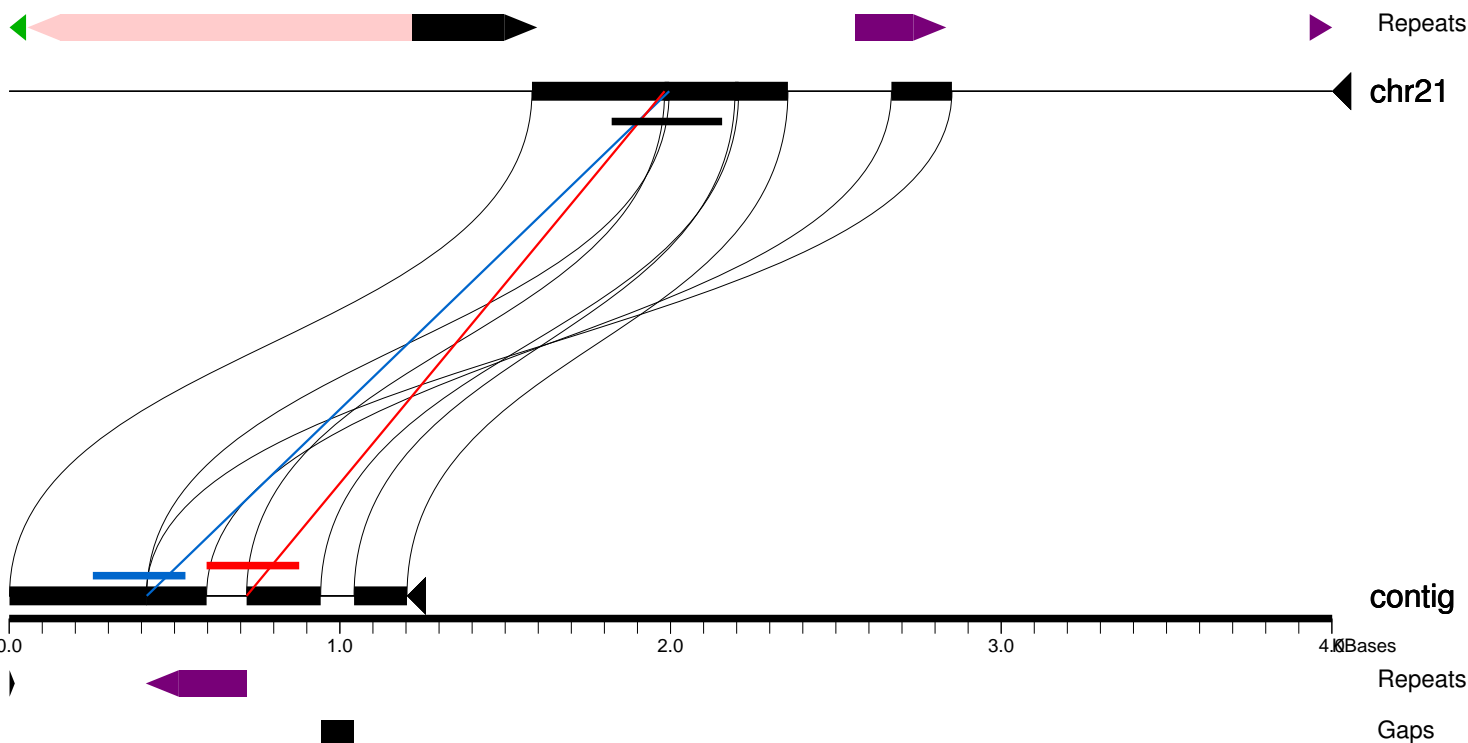

siteID: chr21\_11071314 Scafftig1 - Breakpoint: chr21:11071295

chr21:11071135-11071470

Overlap Length: 16 INS size: 302 Genotyped: Yes

```
left -----TTGGCCGTGATACATAAGACAAACAAAGGAAGACAACAAAATATAGAGAGAGGG
chrom ACAGCTTTAAAAACCCCTTGGCCGTGATACATAAGACAAACAAAGGAAGACAACAAAATGTAGAGAGAGGG
right AGAA-----TGGC-GTGA-ACCCGGGA-----GGCGGAGCTTGCAGTGAGCCGAGATCC
2N2N 1****1****1**1111**11111111**11**111111*1*21111****111
```

```
left CAGGCCAATTAGGGCTTCAGGTGCCAAGAAAAACAAGAGGATGAATTCCCTAGGTTTCCTTTCTGACTCA
chrom CAGACCAATTAGGGCTTCAGGTGCCAAGAAACACAAGAGGATGAATTCCCTAGGTTTCCTTTCTGACTCA
right CG--CCACT--GCACTCCAG---CCTGGG--CAAAAGAG-----CGAGACTCCATCTCAAAAAAAA
*11N***1*11*11**1***111**11*1112*1*****111111111111*1**11*1*1*1**11*111*
```

```
left TATATACAAGAAAAGTTGCTAGAGAAGCAGACAACTG-GCCGGGCGCGGTGGCTCACGCCTGTAG-----
chrom TATATACAAGAAAAGTTGCTAGGAGAAGCAGACAACTCCAGAAAACACCAACAGGCACACACATACATAAAAC
right AAAAAAAAAAAAAAAAAAAG---AGAGAAGCAGACAACTCCAGAAAACACCAACAAGCACACACATACATAAAAC
1*1*1*1**1****1111111*******22*22222*222221**2***2*2*22*222222
```

```
left TCCAGCACTTTGGGAGGCC-----GAGGCGGGCGGATCACGAGGTCAGGAGA--TC
chrom TCCAAGAAAATTCTGCTGTCTCTTTGTCAAAAAAAGCAGGGAAAGCGGCAGGCTACCAAGAAAAAAAAA-CTC
right TCCAAGAAAATTCTGCTGTCTCTTTGTCAAAAAAAGCAGGGAAAGCGGCAGGCTACCAAGAAAAAAAAAACTC
***2**2*22**22*22*2*222222222222222222**2****22**2*22*2**222*22*2*12**
```

```
left G-AGAC-----CATCCCGGCTAA----AACGGTGAAACCCCGTCTCTA---CTAAA
chrom ACAGACAACAACCAACCAGTTTAAGCCAAAAGGGTACAAAATAAAAACCCCAAGCCATAT
right ACAGACAACAACCAACCAGTTTAAGCCAAAAGGGTACAAAATAAAAAC-----
22****2222221*2**2*22***2222**2***22**222222*21N1 1NN1N
```

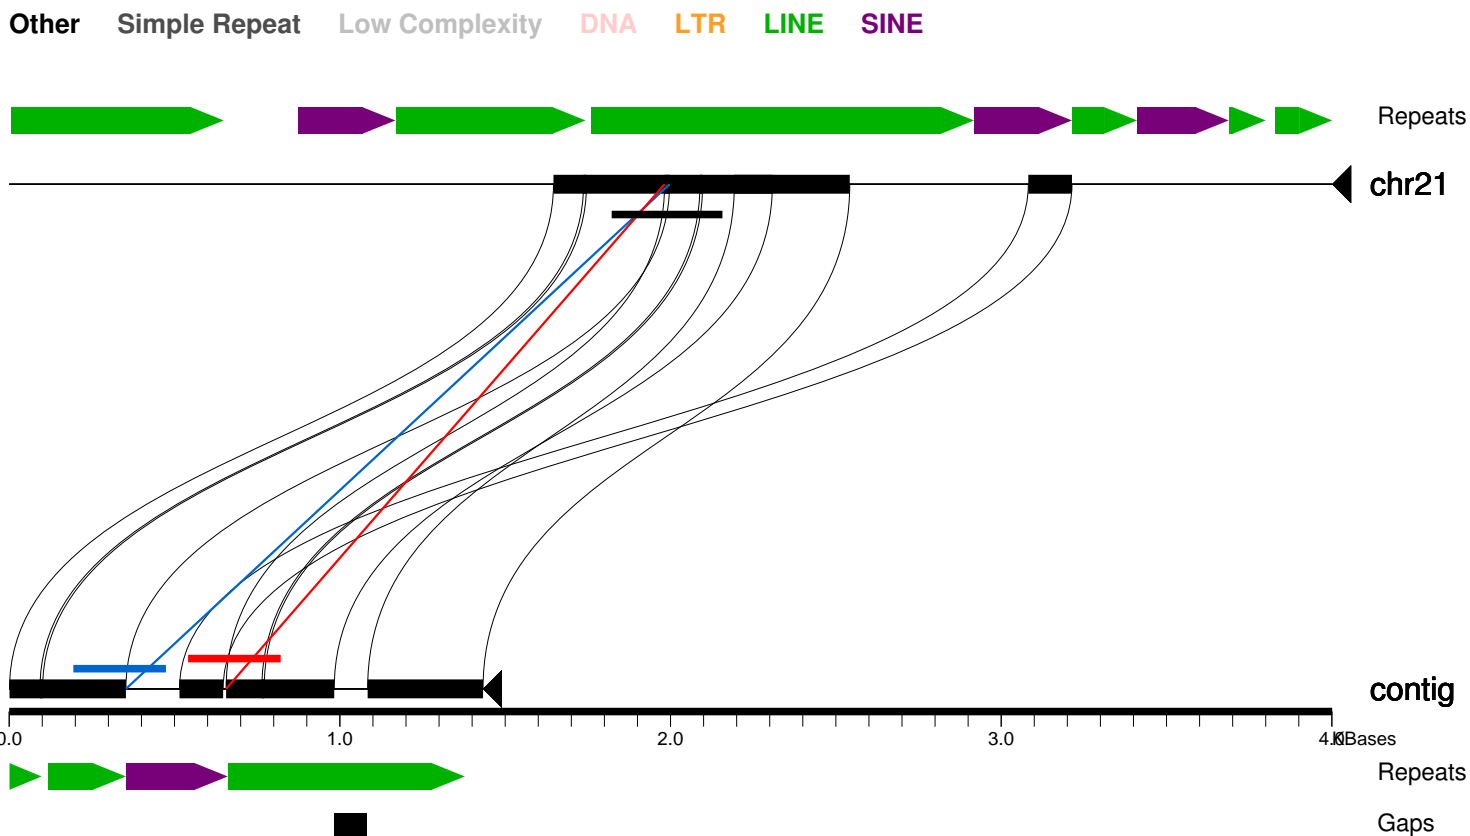

siteID: chr21\_14414986 Scafftig1 + Breakpoint: chr21:14414991

chr21:14414835-14415162

Overlap Length: 12 INS size: 307 Genotyped: Yes

```
left -----GTGCCAATGGCCATGCAGAAGTAG-TAACACTTCTGGTAGATAGAAAAGTGCCAGCTTGACGT
chrom CTGGGCCTGTGCCAATGGCCATGCAGAAGTAG-TAACACTTCTGGTAGATAGAAAAGTGCCAGCTTGACGT
right GGAGAATGGCGTGAA---CCCGGGAGGCGGAGCTTGCAGT----GAACCTAGATCGCGCCA-CTGCAC-T
NNN2NNNN*1*11**111**11*1**11*1**1*11**1*1111*1*11****11*1****1**11**1*
```

```
left CCTTGATGGCGAAAAACAGGACAACCTCTGATGAAGGTAAATGGTAGCCAGTTCTTTCAGCAGGAGATGGAT
chrom CCTTGATGGCGAAAAACAGGACAACCTCTGATGAAGGTAAATGGTAGCCAGTTCTTTCAGCAGGAGATGGAT
right CCAGCCTGGGCGACAGAGCGAGACTCCG-----TCTCAAAAAAAAAAAAAAAAA
**11111***111*1*1**1111****1*11111111111111111111111111111111*1***11*11*1*111*1
```

```
left TTGGTTTAAATACATAGAATAAAAAATGAAAGGCCGGGCGCGG-----TGGCTCAGCCTGT---
chrom TTGGTTTAAATACATAGATAAAAAATGAAATTTATCTCATTTGAAATATAACTAGTTTGTGAAACCTGTGGA
right TA-----AAAAATAAAAAATAAAAA-TGAATTTATCTCATTTGAAATATAACTAGTTTGTGAAACCTGTGGA
*1111111***1*1*1*1*1*****1***2222222*222*22222222222*222*2*22*****222
```

```
left -----AATCCCAGCACTTTGGGAGGCCGAGGCGGGCGGA----TCACGAGCTCAGGAGATCGA
chrom ATATTTATTTATATTTTCTATAATTTATAATTTACTTCTTTGCTTTAATACTGACAGGCTCTGCAATGCCA
right ATATTTATTTATATTTTCTATAATTTATAATTTACTTCTTTGCTTTAATACTGACAGGCTCTGCAATGCCA
22222222222*2*2**222*2***222*2222222222*2222*2222*2**22***2*2*222*2*
```

```
left GACCAT--CCTG-GCTAACATGGTGAAC---CCCGT-CTCTACTAAA-
chrom GAGGGAGGCTTGTGCAAATATTTCTCATAGATTCTGGTGCTGATCCAAAT
right GAGGGAGGCTTGTGCAAATATTTCTCATAGATTCTGGTGCT-----
**222222*2**2**2**2**22*2*2*2222*22**2**NNN1N111
```

Other   Simple Repeat   Low Complexity   DNA   LTR   LINE   SINE

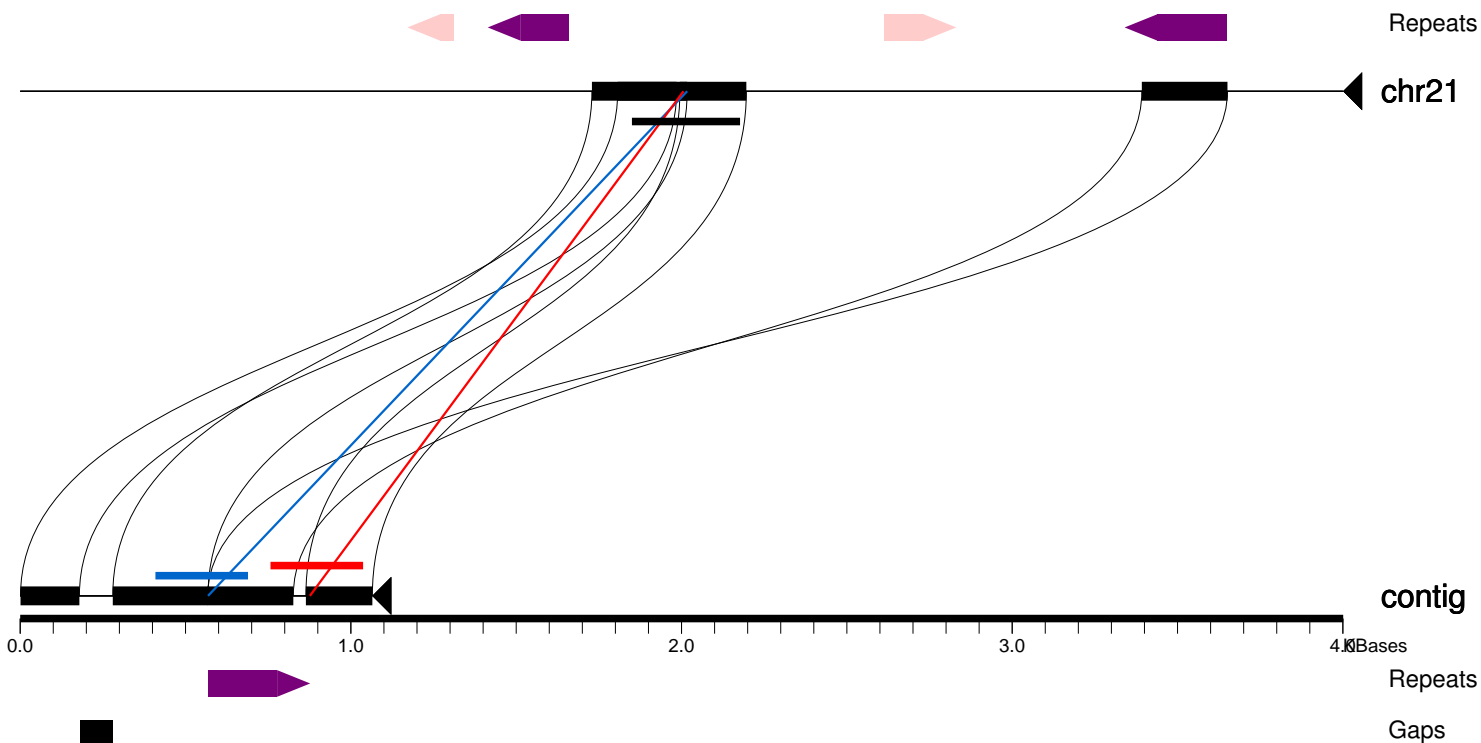



siteID: chr21\_16461794 Scafftig8 - Breakpoint: chr21:16461785

chr21:16461625-16461950

Overlap Length: 6 INS size: 270 Genotyped: Yes

left -----ATTTCCTTTATTGCAGCATGAGAACAGACTAATACAACAACACTGTATACAAATTTTGGGAAAAATTT  
chrom TCAGGTATTTCCTTTATTGCAGCATGAGAACAGACTAATACAACAACACTGTATACAAATTTTGGGAAAAATTT  
right GGAGA-ATGGCGTGAACCCGGGAGGCGGAGCTTGCAGTGAGCCGAGATTGCGCCACTGCACTCCAGCCTG  
NN22N \*\*11\*1\*1\*111\*1\*1\*1\*1\*1\*111111\*1\*1111\*1\*111\*111\*1\*1\*111111\*111\*1

left AAAAAAAAAACAAAATTTACATGTAATCATAAAATAACCATTAATATTTTACTTTGTTTTTTTATCCTAACC  
chrom AAAAAAAAAACAAAATTTACTTTGTAATCATAAAATAACCATTAATATTTTACTTTGTTTTTTTATCCTAACC  
right GGCGACAGAGCGAGACTCCGTCTCAAAAAAAAAAAAAA-----AA-----  
1111\*1\*1\*111\*111\*1\*N\*1\*1\*11\*1\*\*\*\*1\*\*11111\*\*111111111111111111111111111

left TTTTCTAACACATAAAACATATTCACCT----TGGGAGGCGGAGG---CGG-----GCGGATCA  
chrom TTTTCTAACACATAAAACGTATTTCACACACATGTAAATACAAAACAAACGTCTCCTATCTATCGCATTTCT  
right -----AAAAAAAAAAAAAAATTCACACACATGTAAATACAAAACAAACGTCTCCTATCTATCGCATTTCT  
1111111\*\*1\*1\*1\*\*\*1N1\*\*\*\*\*22222\*22\*222\*2\*22222\*2222222222222\*222\*2

left CGAGGTCAGGAGATC-GAGACCATCCC-GGCTAAAACGGTGAAACCCCGTC---TCTACTAAAAATACAA  
chrom CTATGCATGTTTATCTGTTTGCATACATGGATATGTATGTGCATGTATATGCATTGTATTACGAATATAG  
right CTATGCATGTTTATCTGTTTGCACACATGGATATGTATGTGCATGTATATGCATTGTATTACGAATATAG  
\*2\*2\*222\*222\*\*\*2\*2222\*12\*22\*\*2\*\*22222\*\*\*2\*22222\*2222\*2\*\*2\*\*22\*\*\*2\*2

left AAAATTAGCCGGGCGT-----AGTGGCGGGCGCCTG-  
chrom TTTATTATTTTTCTTTTACTCCTTTTAAAAAAATTTCAATACAGTGT  
right TTTATTATTTTTCTTTTACTCCTTTTAAAAAAATTTCAATAC-----  
222\*\*\*2222222\*2222222222222\*2\*22\*22222NN11

Other Simple Repeat Low Complexity DNA LTR LINE SINE

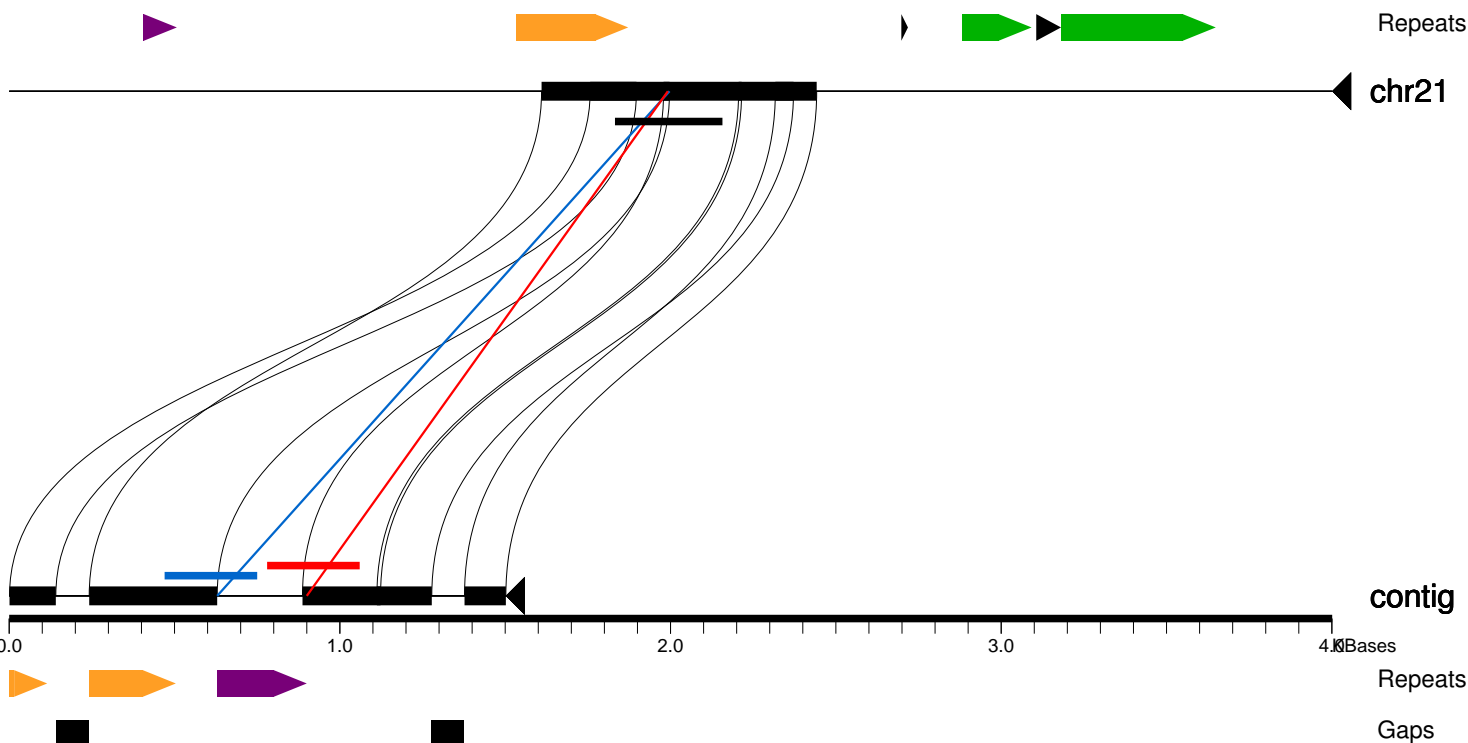

siteID: chr21\_16980900 Scafftig1 - Breakpoint: chr21:16980894

chr21:16980849-16980953

Overlap Length: 15 INS size: 458 Genotyped: No

```

left   AAA--AGCATAGGA-----AAAG-----GAATAAATGAAAGTAAAATTTAAATTTTTT--AATTTTTTCAT
chrom  AAA--AGCATAGGA-----AAAG-----GAATAAATGAAAGTAAAATTTAAATTTTTT--AATTTTTTCAT
right  CCACCCGCCTCGGCCTCCCAAAGTGCTGGGATTACAGGCGTGAGCCACCGCGCCCGGCCAAATTTTTTCAT
       11*111**1*1**111111****111111**1**1*1*111*1111*111111111111*****
left   TCTTTTTTTNNNNNNNNNNNNNNNNNNNNNNNNNNNNNNNNNNNNNNNNNNNNNNNNNNNNNNNNNNNNNN
chrom  TCTTAATT-----GATCTAAAGGATAACAGTTTTTTAAGATAATAACAATAATAT
right  TCTTAATT-----GATCTAAAGGATAACAGTTTTTTAAGATAATAACAATAATAT
       ***22**2222222222222222222222222222222222222222222222222222222222222222222222
    
```

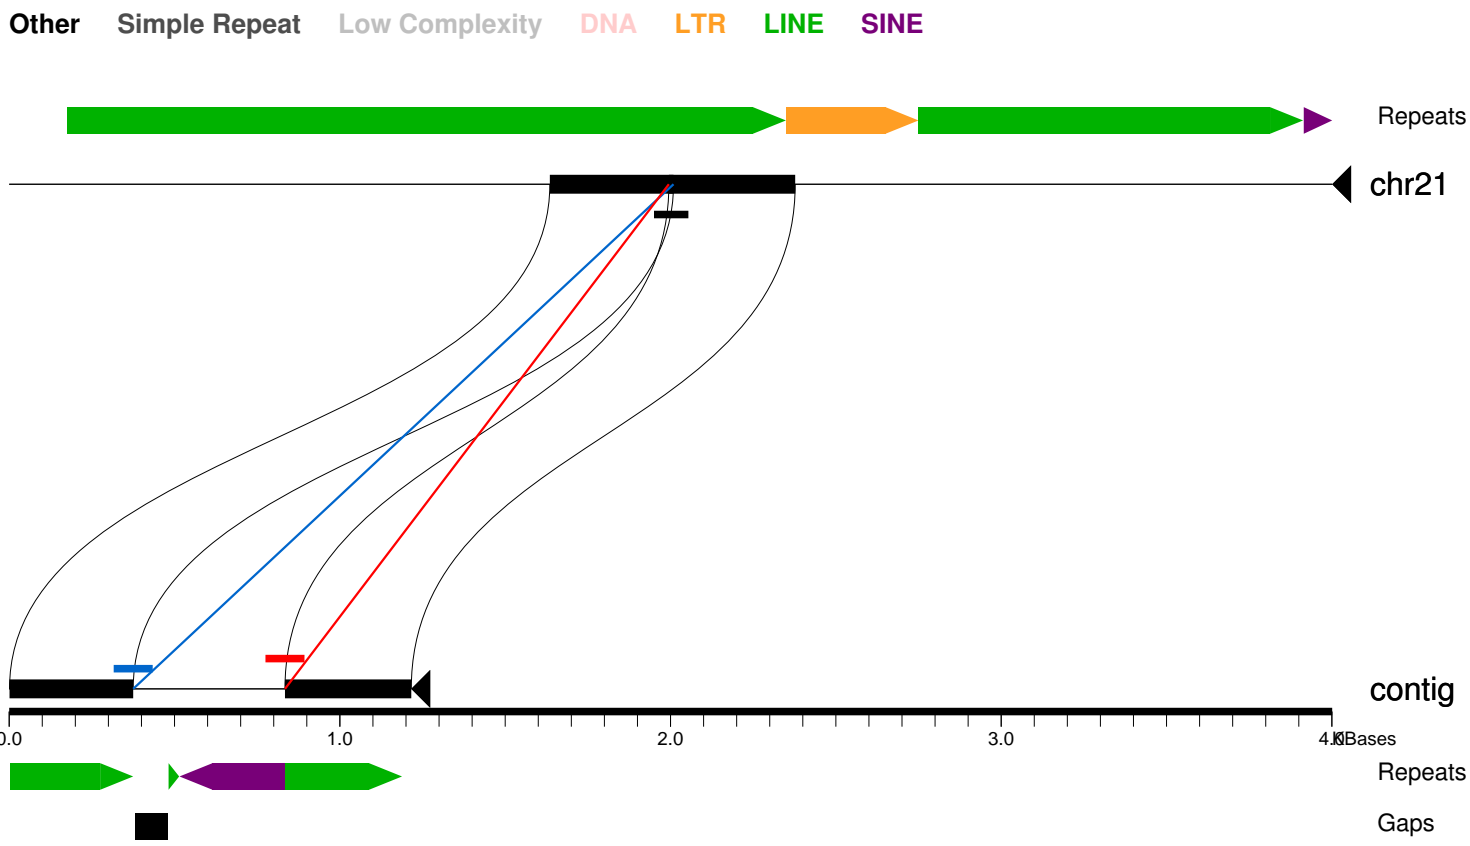

siteID: chr21\_21324527 Scafftig3 - Breakpoint: chr21:21324525

chr21:21324481-21324584

Overlap Length: 16 INS size: 494 Genotyped: No

```

left   CCCAATT--CTCAG---ACCAAGATATTCTCACTA-AGGAGT-AGTTGTCA-----CCACATCCGAT
chrom  CCCAATT--CTCAG---ACCAAGATATTCTCACTA-AGGAGT-AGTTGTCA-----CCACATCCGAT
right  TCCGCCCCGCTCGGCCTCCCAAAGTGCTGGGATTACAGGCGTGAGCCACCGCGCCCGGC-CCACATCCGAT
      1**111111***1*1111****11*11*111*1**1***1**1**1111*1111111111*****
left   TTCTTTTTTTTNNNNNNNNNNNNNNNNNNNNNNNNNNNNNNNNNNNNNNNNNNNNNNNNNNNNNN
chrom  TTCTTAAAATCTCTGGCATATCATCCCATCATTTCTACTTGAGCCTGCTC-----
right  TTCTTAAAATCTCTGGCATATCATCCCATCATTTCTACTTGAGCCTGCTC-----
      *****2222*2*22222222222222222222222222222222222222222222222222222222222
  
```

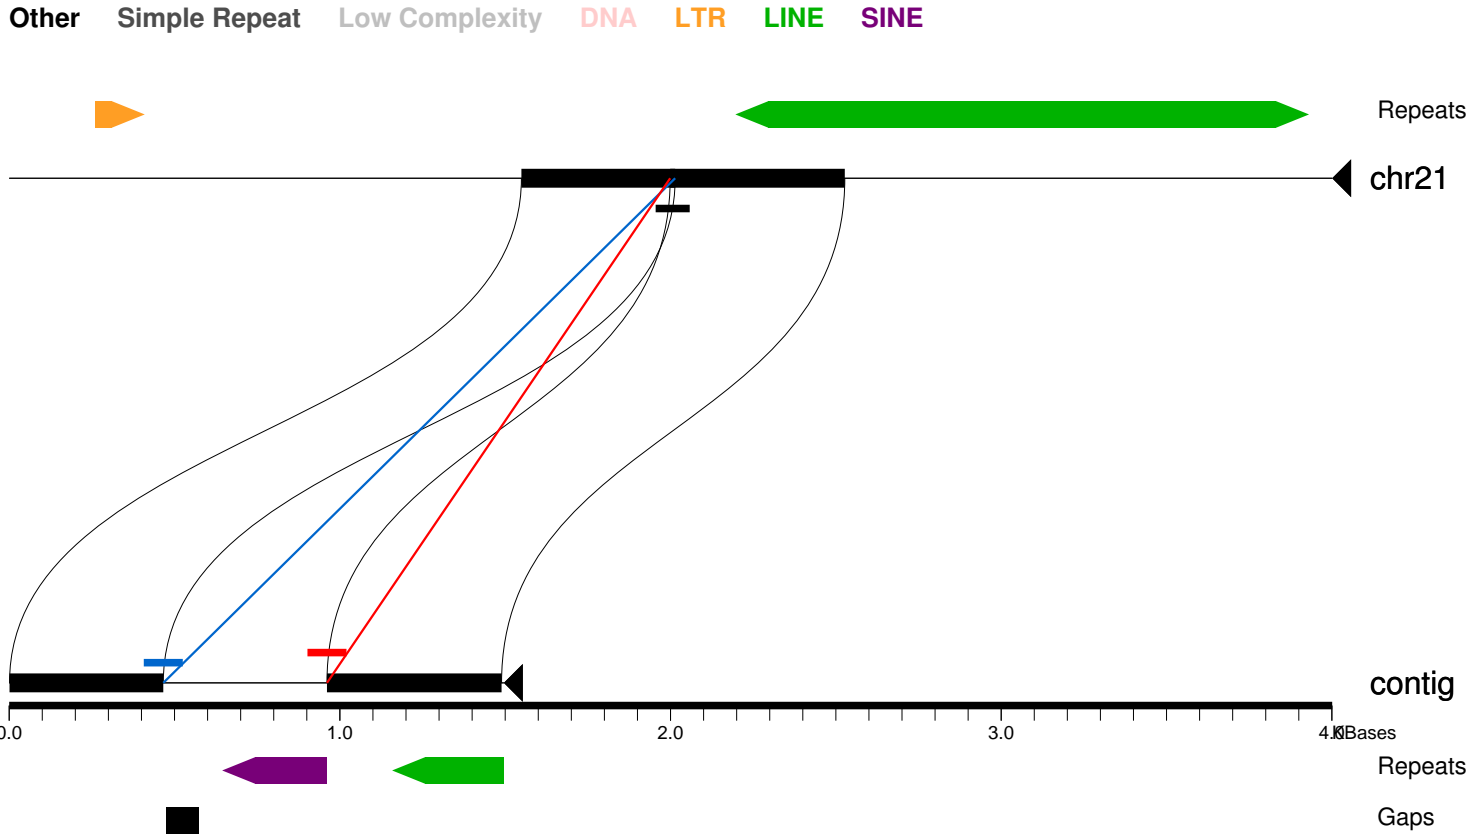







siteID: chr21\_24975445 Scafftig3 + Breakpoint: chr21:24975491

chr21:24975411-24975545

Overlap Length: 12 INS size: 319 Genotyped: Yes

```
left  ----TGCACACATCTTAAGAAAAAAAAAATACAGAAAATACAGCTAATACACTGATTTTTTTTTTTTGCAAA
chrom ----TGCACACATCTTGAGAAAAAAAAAATACAGAAAATACAGCTAATACACTGATTTTTTTTTTTT-GCAAA
right GTGATCCGCCCGCCTCGGCCT-----CCCAAAGTGCTGGGATTACAGGCGTG-----AG
      1111*1*1*1*11**1211111111111111*11***1*1*1*11*1****1111*11111111112111*1

left  GCAAATATCTTGCCTTGATTTCTCTCT-----CTTTTTTTTT-----TTTTTTTTTTTTTTTTT
chrom GCAAATATCTTGCCTTGCTTTCTCTCTTAAACACACTGAAGTTCTAGAAGAGATTTGAAAGCATTATTTATT
right CCACCGCGCCTGGCCTGATTTCTCTCTTAAACACACTGAAGTTCTAGAAGAGATTTGAAAGCATTATTTATT
      1**11111*1**1*1*N*****2222222**2222**2*22222222**222222*****2**
```

Other Simple Repeat Low Complexity DNA LTR LINE SINE

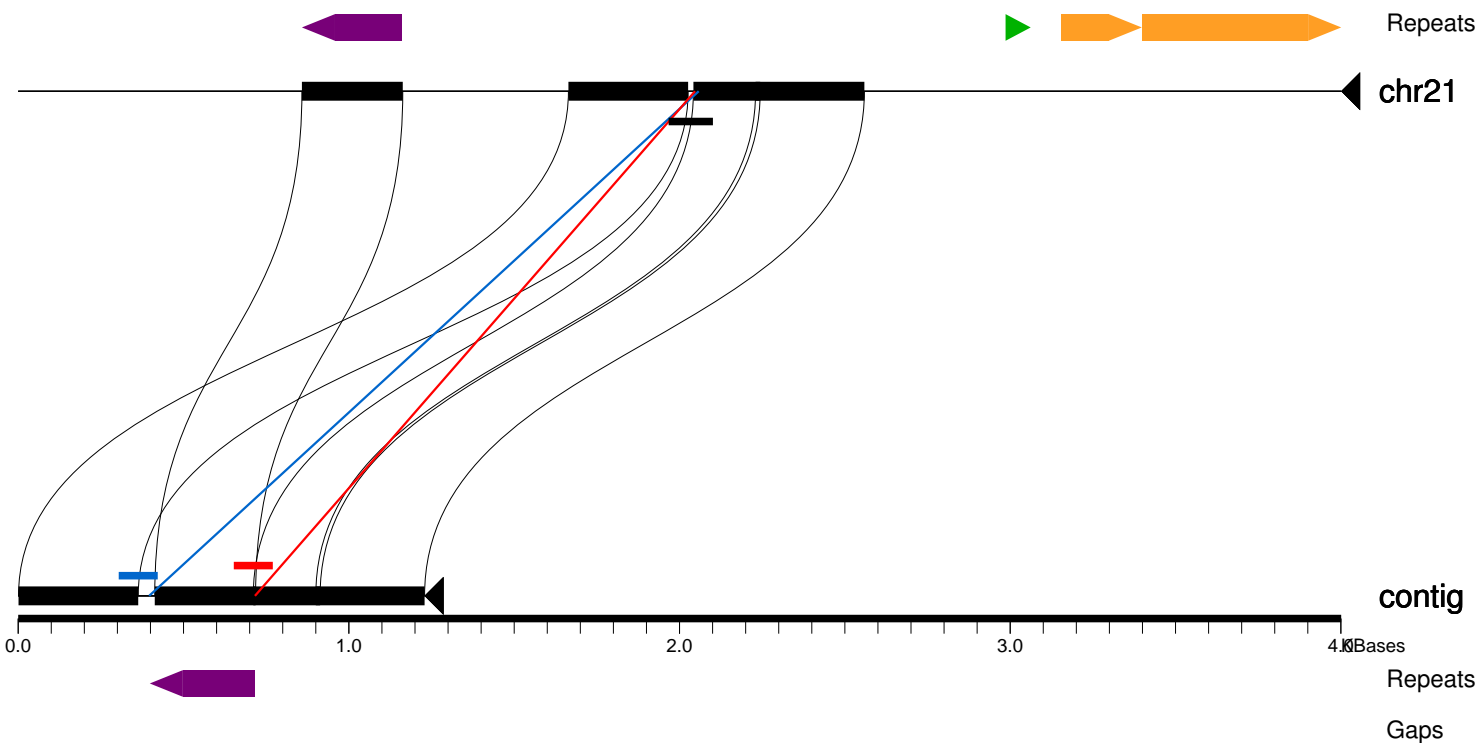

siteID: chr21\_25411382 Scaffitg1 - Breakpoint: chr21:25411368

chr21:25411325-25411438

Overlap Length: 17 INS size: 120 Genotyped: Yes

```
left  CAAAATGCTCTATTGATTTATGA----TCATTGAGATAAATATTATTTTCAGCTATAACATTTTTTTTTTTTT
chrom CAAAATTGTTCTATTGATTTATGA----CCATTGAGATAAATATTATTTTCAGCTATAACATTTTTTAAATAAC
right CCAGGCGGGACTGCGGACTGCAGTGGCGCAATCTCGGCTCACTGCAAATCAGCTATAACATTTTTTAAATAAC
      *1*1111*N1**111**1*111*1111121**111*111111*1111*****22*222
```

```
left  TTTTTTTT-TTTTTTTTTTTTTTTTTTTTTTTTTTTTTTTTTTTTTTTTTTTTGGAGACGGAG
chrom CAAAAAAA-CAAAACATTTAGGGGAATCCTGAATCTAGTTT----GAGATTGT-
right CAAAAAAAACAAAACATTTAGGGGAATCCTGAATCTAGTTT----GAGATTGT-
      2222222212222222***2222222*22*222*2*22***2222****22*22
```

Other Simple Repeat Low Complexity DNA LTR LINE SINE

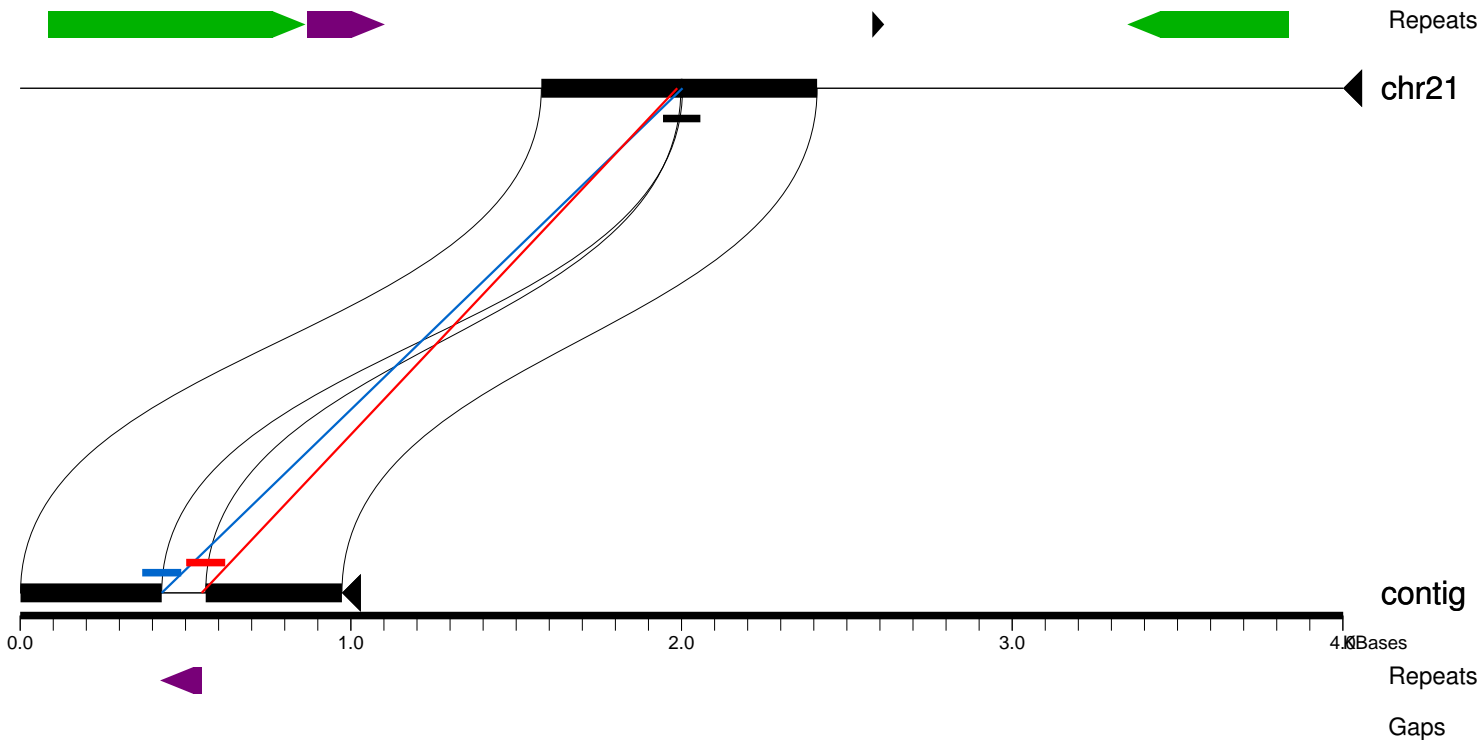

siteID: chr21\_26286128 Scaffitig1 - Breakpoint: chr21:26286098

chr21:26286047-26286136

Overlap Length: 9 INS size: 306 Genotyped: Yes

```

left AAAGA-----ATCTTGTTCCCTCTTAATGA-ATTCAG-----AAAAGAAAGAC
chrom AAAGA-----ATCTTGTTCCCTCTTAATGA-ATTCAG-----AAAAGAAAGAC
right GCCGAGATCCCGCCACTGCACTCCAGCCTGGGCGACAGAGCGAGACTCCGTCTCAAAAAAAAAAAAAAAAAA
      111**111111111111111111111111111*1*1**11*11*11*11**1*1**1*111111111****1***1*1

left CATTTAATACACATGGCAGGCCGGGCGCGGTGGCTCACGCCTGTAATCCCAGCACTTTGGGAGGCCGAGG
chrom CATTTAATACACATGGCAG-----CATTTATTTGTCAACATTATGTTACAAAAAT-
right AAAAAAAAAACAAAGGCCG-----CATTTATTTGTCAACATTATGTTACAAAAAT-
      1*111**1*1***1***1*22222222222222222222*2*2222*22**2**2*2**22*22222*22

left CGGGCGGA
chrom -----
right -----
      22222222
    
```

Other Simple Repeat Low Complexity DNA LTR LINE SINE

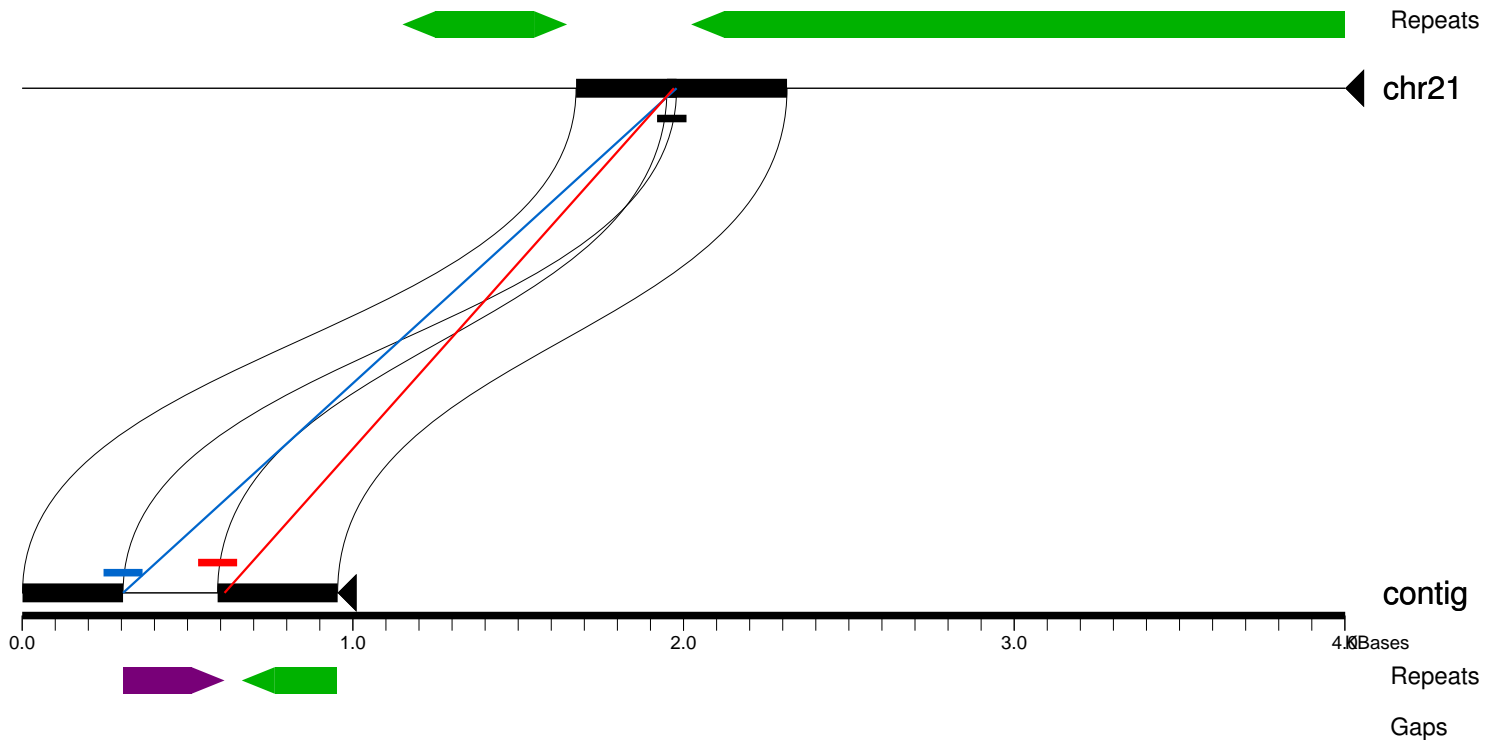



siteID: chr21\_26497436 Scafftig7 - Breakpoint: chr21:26497421

chr21:26497372-26497480

Overlap Length: 11 INS size: 307 Genotyped: Yes

```
left   TT-AGCATCAACCTCTGCATGGGTTTATG-----AAGAAGATGCATTGCTTTGTTAAGGAAGGATG
chrom  TT-AGCATCAACCTCTGCATGGGTTTATG-----AAGAAGATGCATTGCTTTGTTAAGGAAGGATG
right  TCCAGCCTGGGCGACAGAGCGAGACTCCGTCTCAAAAAAAAAAAAAAAAAAAAAAAAAAAAAAAAAAAGGAAGGATG
      *11***1*111*11*1*111*1*11*11*111111111**1**1*111*1111111111*****
```

```
left   GGCCGGGCGCGGTGGCTCACGCCTGTAATCCCAGCACTTTGGGAGGCCGAGGCGGGCGG---
chrom  -----TATTACATAC-TGTAAGCTTAGTATTTTACCAGGAAAAAAAAATAGGGTAAA
right  -----TATTACATAC-TGTAAGCTTAGTATTTTACCAGGAAAAAAAAATAGGGTAAA
      222222222222*2222**22*2*****2*22**2*2***222***222*22222*2*2222
```

Other Simple Repeat Low Complexity DNA LTR LINE SINE

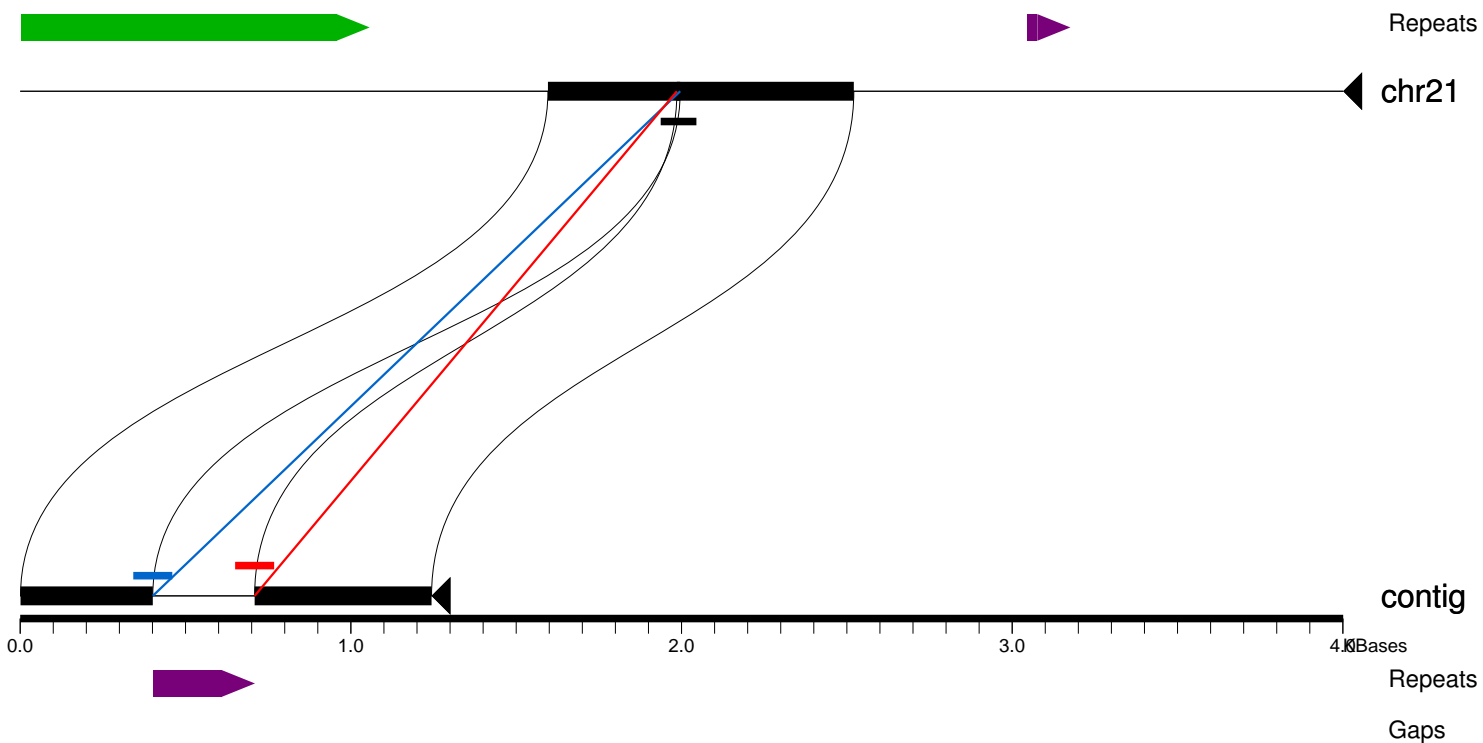

siteID: chr21\_28221334 Scaffold1 - Breakpoint: chr21:28221341

chr21:28221300-28221400

Overlap Length: 16 INS size: 419 Genotyped: No

```

left      AAACATTTGCTAGAGAAACAACATAATGTGCAT--ATTTC-----TAA-----CCGGGGAA
chrom     AAACATTTGCTAGAGAAACAACATAATGTGCAT--ATTTC-----TAA-----CCGGGAAA
right    TCCGCCCCGCTCGGC---CTCCCAAAGTGCTGGGATTACAGGCGTGAGCCACCGCGCCCGGC***2**
          1111111*1**1*11111*11*1**1***1111***1**1111*1*1111111111111111*
left      TGCTTTTTTNTTTTTTTTTTTTTTTTTTTTTTTTTTTTTTTTTTTTTTTTTTTTTTTTTTTTTTTTT
chrom     TGCTTTTTTATT-----CACATTTTAGTACCATAAGATTGACTAATTAGAAATAGGGA
right    TGCTTTTTTATT-----CACATTTTAGTACCATAAGATTGACTAATTAGAAATAGGGA
          *****2**22222222222222222222222222222222222222222222222222222
  
```

Other Simple Repeat Low Complexity DNA LTR LINE SINE

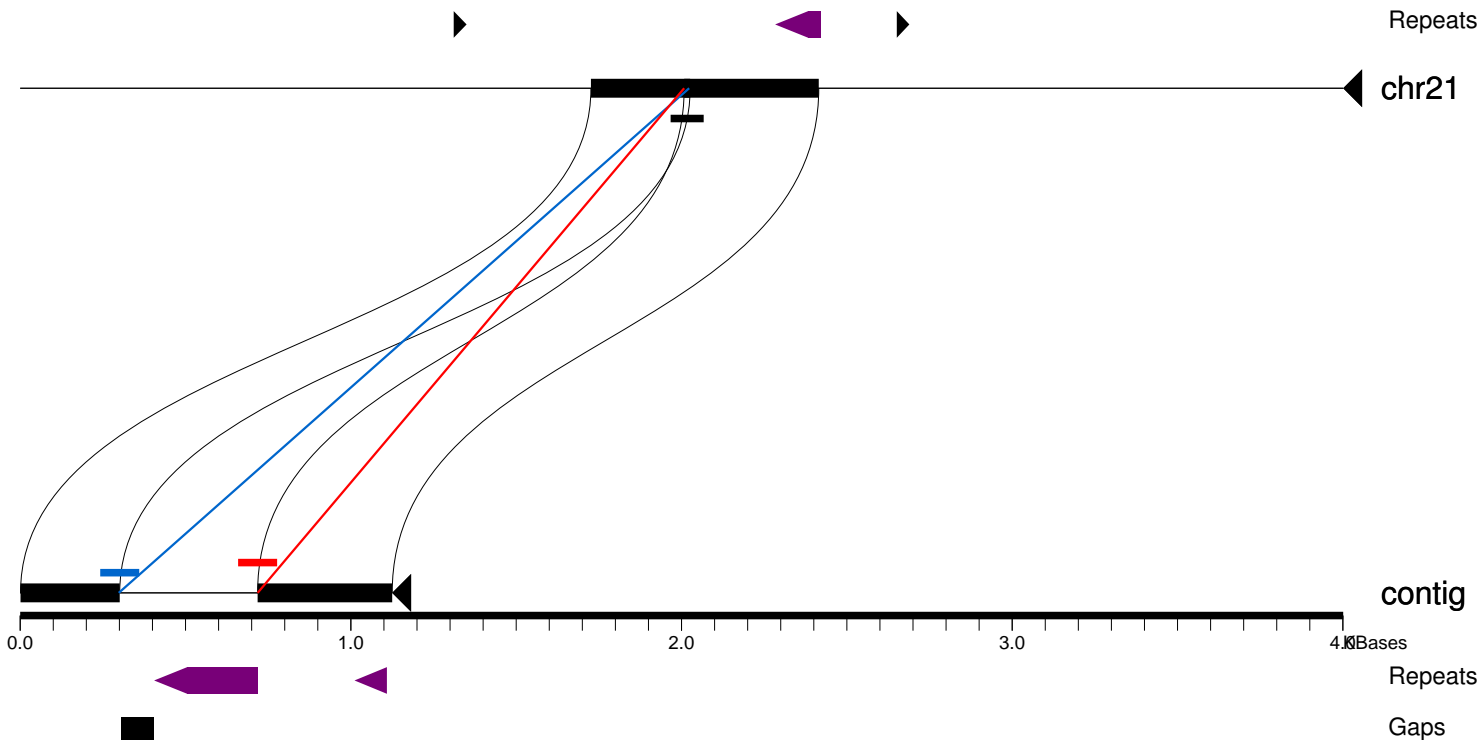

siteID: chr21\_28249225 Scafftig9 - Breakpoint: chr21:28249235

chr21:28249075-28249407

Overlap Length: 13 INS size: 319 Genotyped: Yes

```
left -----CACTTGAAGCCCAGATTTTGTATTTTCAAGTAACATT-CTCCAAAGAAAAGAAACCACG
chrom GTAGCAATAAGAACAACACTTGAAGCCCAGATTTTGTATTTTCAAGTAACATT-CTCCAAAGAAAAGAAACCACG
right GGCGT-----GAACCCGGGAAGCGGAGCTTGCAGTGAGCCG---AGATTGCGCCACTGCAGT---CCGCA
2NN2N 222*1*11*****11**1**1111*111*11111*1***1*1***11*1*11111**1*1
```

```
left CTCTTTGGTAAAAGAGGTTGCTTGGACAAGGAAAAATATAGGACGTGCTTGAATATCTTGTGGTACCAGAA
chrom CTCTTTGGTAAAAGAGGTTGCTTGGACAAGGAAAAATATAGGACGTGCTTGAATATCTTGTGGTACCAGAA
right GTCCG-----GCCTGGGCGACAGAGCGAGACTCCGT-CTCAAAAAA-----AA
1***1111111111111111**1***1*1*111*111*1*111***1**11***1*1111111111111111**
```

```
left AGTAAAGTAGTTATAACTATAAATTTACTTGTGTGGCCG-----GGC--GCGGTGGCTCACGCCCTG-
chrom AGTAAAGTAGTTATAACTATAAATTACTTGTGTGTTAAACATAATTTTTGGCAAGCAAAAAGTATACTGCAGA
right AAAAAAAAAAAAAAAAAAAAAAACAAATTACTTGTGTTAAACATAATTTTTGGCAAGCAAAAAGTATACTGCAGA
*11***11*111*1**11*11*****11*222*222222222***22*2222*222*22*2*2
```

```
left -TAATCCAGCAC-----TTTGGGAGGCCGAGGCCG-----GTGGATCATGAGGTCAGGAGAT
chrom ATACTTGCAGTATCATTCTATTTGTGTGACGTCTACAAATACCCCAAAGTAGA-CATATTGTTAAAGGAT
right ATACTTGCAGTATCATTCTATTTGTGTGACGTCTACAAATACCCCAAAGTAGA-CATATTGTTAAAGGAT
2**2*22***2*22222222***2*2*2*22222*222222222222**2**2***222*2*222***
```

```
left CGAGACCATCCTGGC--TAACAGGGTGAAACC--CGTC-TCTACTAAA-----
chrom GCAAAACATACATGGTGATAATCTAAAGAAAAATCGACGACATGCAATTCAGAAATGC
right GCAAAACATACATGGTGATAATCTAAAGAAAAATCGACGACAT-----
22*2**222*2***222***222222***22*22*2*2*NN1N1NN1
```

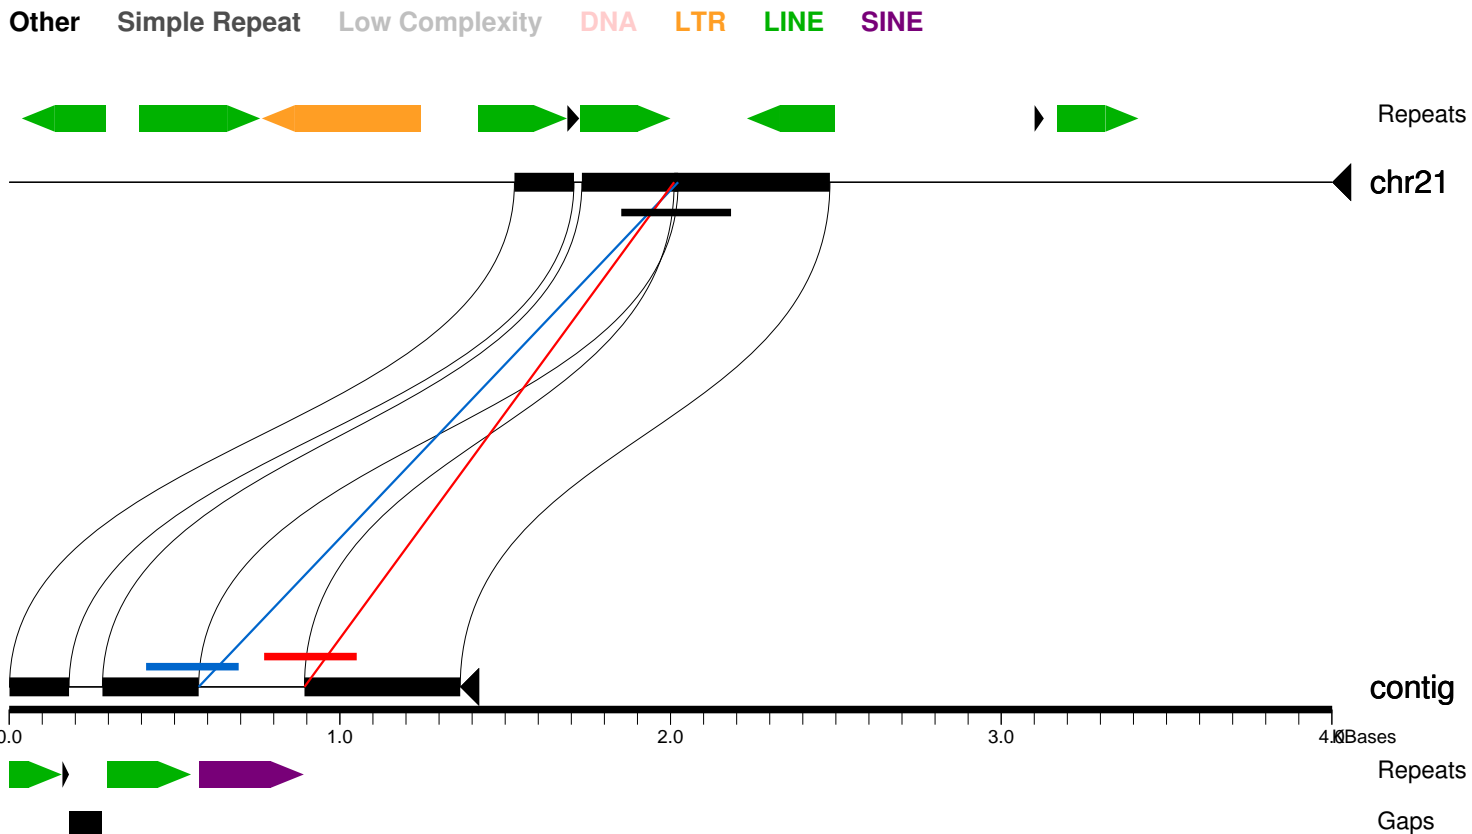







siteID: chr21\_31631959 Scaffitg1 - Breakpoint: chr21:31631954

chr21:31631909-31632013

Overlap Length: 15 INS size: 262 Genotyped: Yes

```
left T-----CTC----ACA-AGCGATTTCTTGAATTCTTGGAAAAAGTTTTTCATAGTAAAAAGAAAT
chrom T-----CTT----ACA-AGCGATTTCTTGAATTCTTGGAAAAAGTTTTTCATAGTAAAAAGAAAT
right TGCACTCCAGCCTGGGGCGACAGAGCGAAA-CTCCGTCTCAAAAAAAAAAAAAAAAAAAAAAAAAA
*11111111111111**N11111***1*****111**11111**1111*****1111111*1*11*****1****
```

```
left AATTC TGGGAGGCCGAGATGGGGCGGATCACGAGGTCAGGAGATCGAGACCATCCTGGGCTAACAC
chrom AATTC-----AAACACAGCTCTGTGTCTACCCTACTTTTCAAAAAATTAAC--TCCT-----C
right AATTC-----AAACACAGCTCTGTGTCTACCCTACTTTTCAAAAAATTAAC--TCCT-----C
**** *2222*22*22**2*22*2*22*22*2222*2222*2*2222**22****22222222*
```

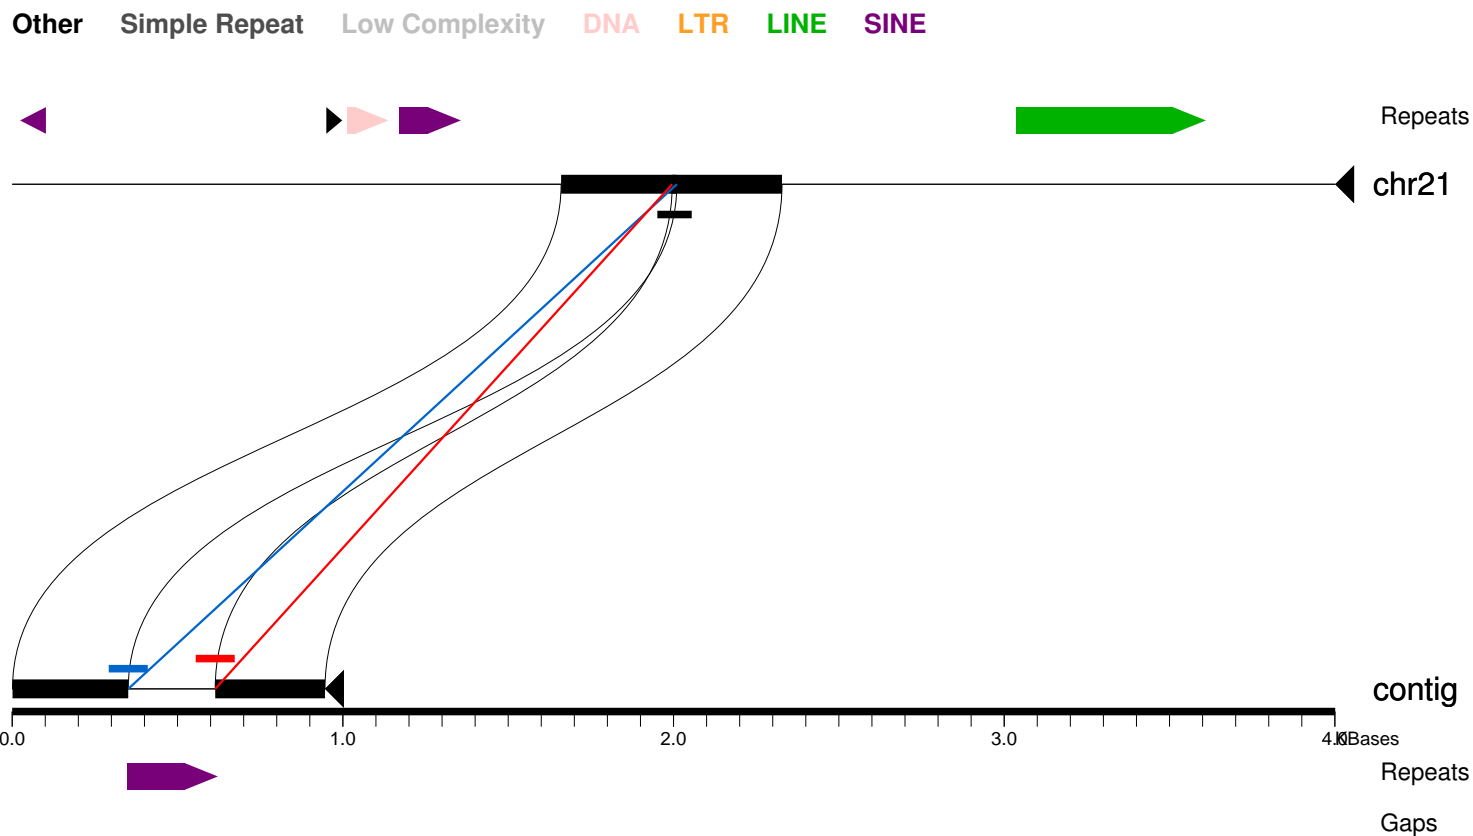



siteID: chr21\_33398542 Scaffitig1 + Breakpoint: chr21:33398519

chr21:33398472-33398578

Overlap Length: 13 INS size: 324 Genotyped: Yes

```
left  GTCTTTCCTTCCTTTCATCCTT---TTCTATCTATAATTGCTCTTGCTA-----CTCCATTCT
chrom GTCTTTCCTTCCTTTCATCCTT---TTCTATCTATAATTGCTCTTGCTA-----CTCCATTCT
right TCCG--CCCGCCTCGGCCTCCCAAAGTGCTGGGATTACAGGCGTGAGCCACCGCGCCCGGCCTCCATTCT
      11*111**11***111*1***11111*1**11111**111**1111**1*111111111111*****
```

```
left  TTTTFFFFFFFFFFFFFFFFFFFFFFFFFFFFFFFFFFFFFFFFGGAGACGGAGTCTCGCTCTGT
chrom TTTTAAAAAATCACACATCTCTTACATGTCACATAACTTATTAT-----CT-GTACT-T
right TTTTAAAAAATCACACATCTCTTACATGTCACATAACTTATTAT-----CT-GTACT-T
      ***222222*222222*2*2**222*2*222*222**2**2*2222222222**2*22**2*
```

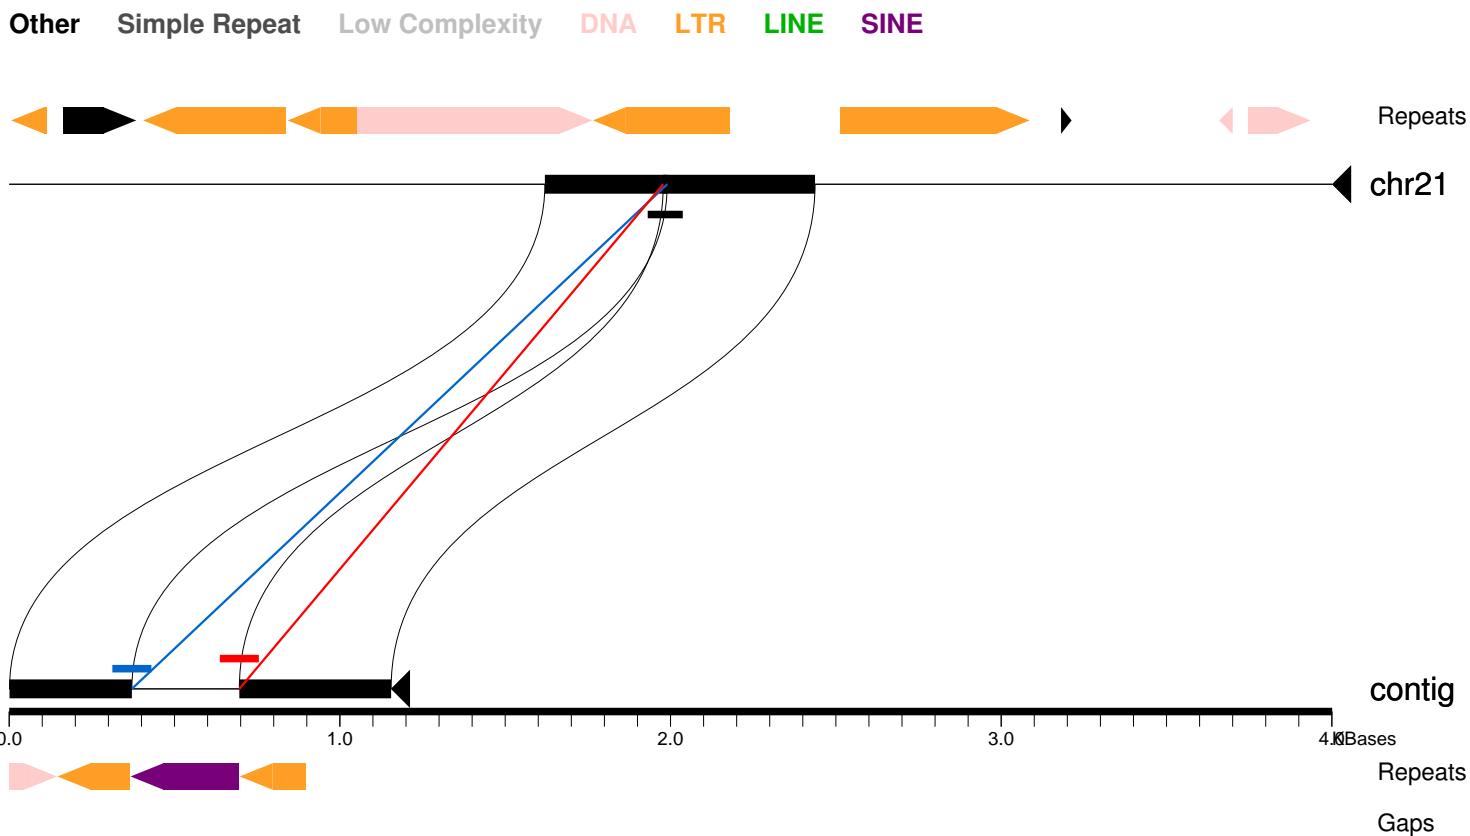

siteID: chr21\_37237928 Scafftig2 + Breakpoint: chr21:37237929

chr21:37237885-37237989

Overlap Length: 16 INS size: 301 Genotyped: Yes

```
left      T-GCCCACTT-----TTTGATGGGGTTTT--TTTCAAAAAATGATAAAAAATGA-----AAAAAATGTTA
chrom     T-GCCCACTT-----TTTGATGGGGTTTT--TTTCAAAAAATGATAAAAAATGA-----AAAAAATGTTA
right     CCGCCCGCCTCGGCCTCCCAAAGTGTCTGGGATTACAGGCGTGAGCCACCGCGCCCGGCCAAAAAATGTTA
          11****1*1*11111*111*11*1*1*1111**1**1111***111*1111111111111*****
```

```
left      TTTTTTTTTTTTTTTTTTTTTTTTTTTTTTGAGACGGAGTCTCGCTCTGTCGCCCAGGCTGGAGTGCAG
chrom     TTTTAAAA-----GATTTTCAAAAAAAGTGAATCCATTACGATTAGG---GA-TACCA
right     TTTTAAAA-----GATTTTCAAAAAA-GTGAATCCATTACGATTAGG---GA-TACCA
          ****222222222222222222****2*2*2221**2222*22*22**222***222**2*2*22
```

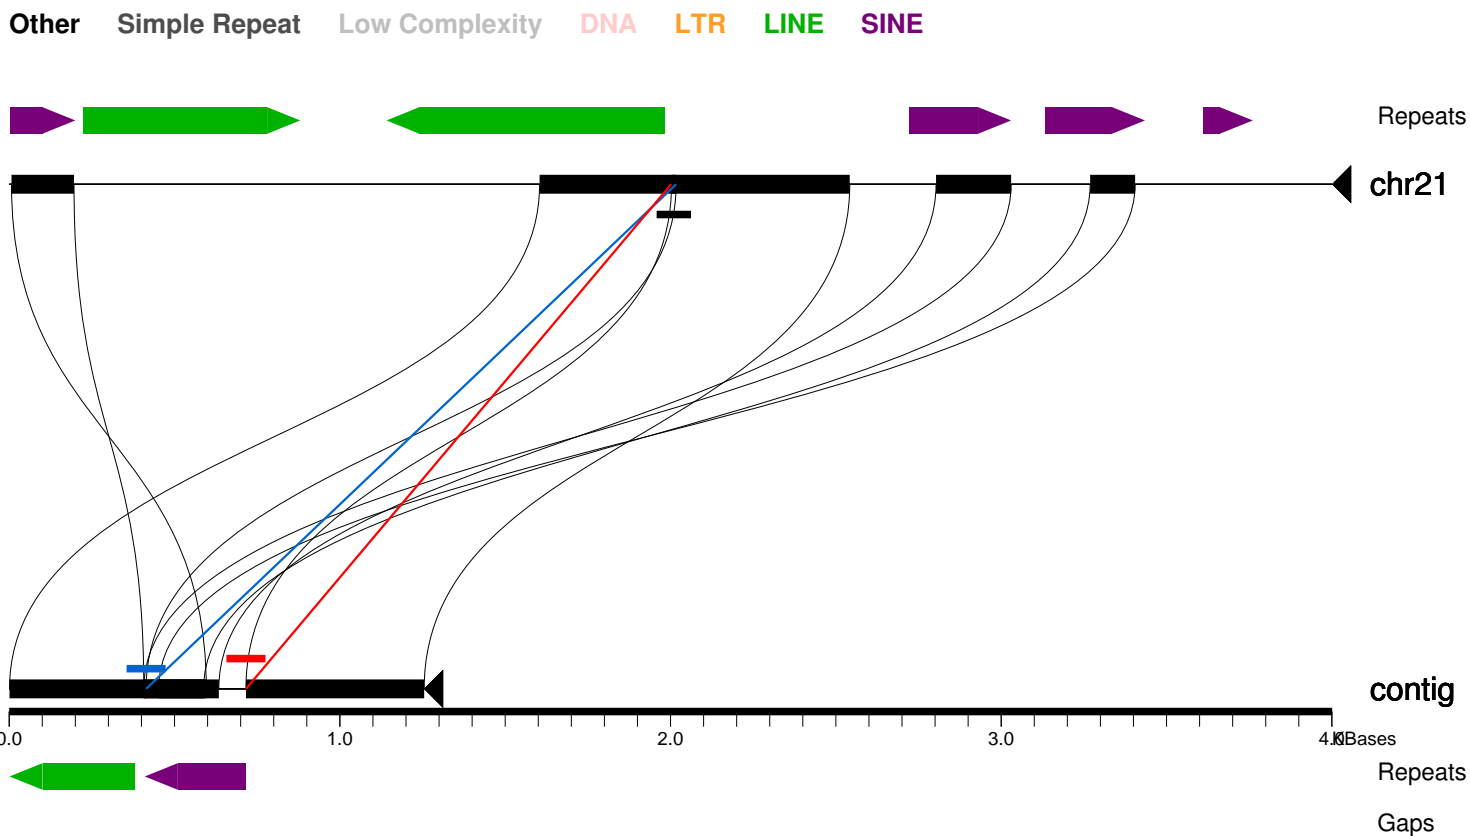

siteID: chr21\_39004569 Scafftig3 - Breakpoint: chr21:39004547

chr21:39004501-39004587

Overlap Length: 14 INS size: 309 Genotyped: Yes

```
left  AAGCTT-----TGCA-TGCACAG-----GACGGA---AAAC-----AATAAGAAAA
chrom GAGCTT-----TGCA-TGCACAG-----GACGGA---AAAC-----AATAAGAAAA
right -AGATTGCGCCACTGCAGTCCGCAGTCCGGCCTGGGCGACAGAGCGAGACTCCGTCTCAAAAAAAAAAAAA
N**1**1111111****1*1*1***111111111111***1**111*1**1111111111**1**1****
```

```
left  GATGAACTTAAAAAATTACCTCGTGGCCGGGCGCGGTGGCTCACGCCTGTAATCCCAGCACTTTGGGAGGC
chrom GATGAACTTAAAAAATTACCTCGT-----TTTGGAAATATATGACCA-CACTTCTAAA---
right AAAAAAAAAAAAAAATAAATTACCTCGT-----TTTGGAAATATATGACCA-CACTTCTAAA---
1*11**111******222222222222222222*222*22*2**222***2*****2222*222
```

```
left  CGAGGCGGGTGG
chrom -----
right -----
22222222222222
```

Other Simple Repeat Low Complexity DNA LTR LINE SINE

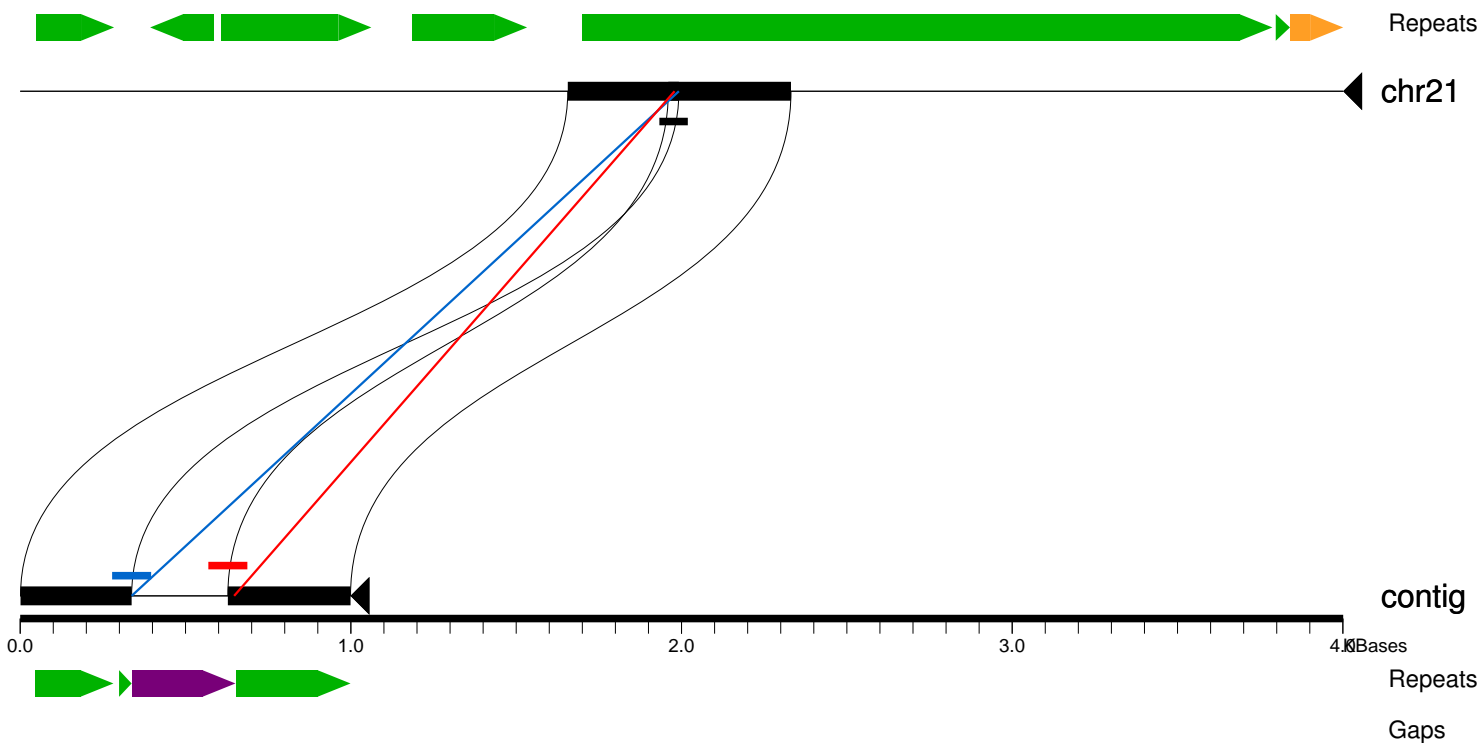

siteID: chr21\_39204473 Scafftig1 + Breakpoint: chr21:39204478

chr21:39204432-39204537

Overlap Length: 14 INS size: 434 Genotyped: No

```
left  AAATATGTAATGGC-----AGGAACTGAGTTGTCAAGAGTAAT-----GAGTTTAAAGTCAAGTTACT
chrom AAATATGTAATGGC-----AGGAACTGAGTTGTCAAGAGTAAT-----GAGTTTAAAGTCAAGTTACT
right CCACCCGCCTCGGCCTCCCAAAGTGCTGGGATTACAGGCGTGAGCCACCGCGCCCGGCCGTCAAGTTACT
      11*1111*11111***1111111*1*11***1*1*11**1*1**1*11111111*11111111*****
```

```
left  TTTTTTNNNNNNNNNNNNNNNNNNNNNNNNNNNNNNNNNNNNNNNNNNNNNNNNNNNNNNNNNNNNNNNNNN
chrom TTT-----GAGATGATGCTATAACTACCTGTGTGAGTGTGAACCTGAGATAAGG
right TTT-----GAGATGATGCTATAACTACCTGTGTGAGTGTGAACCTGAGATAAGG
      **2222222222222222222222222222222222222222222222222222222222222222222222
```

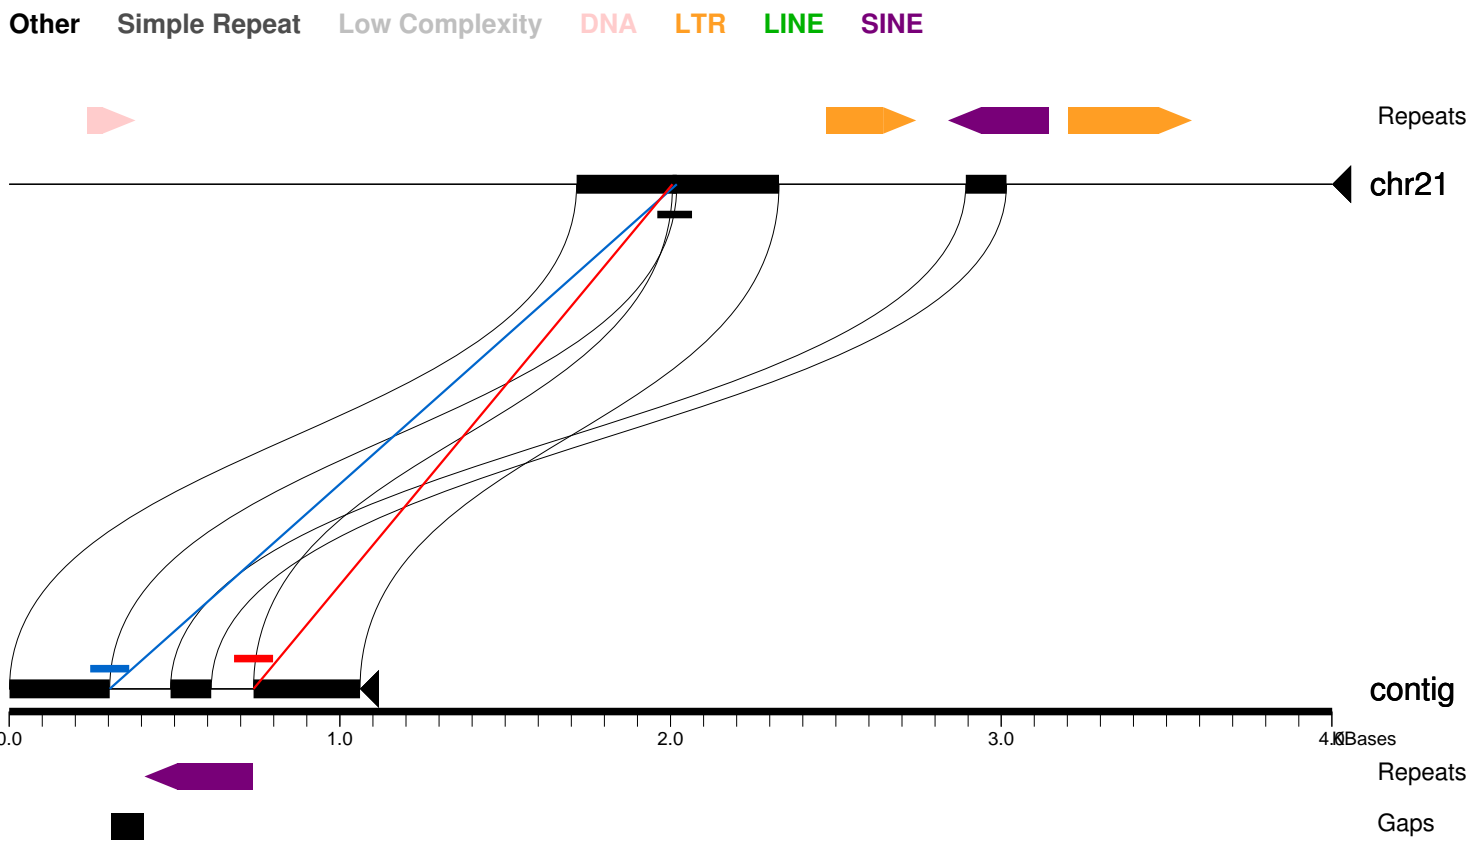



siteID: chr21\_41452073 Scafftig1 - Breakpoint: chr21:41452056

chr21:41452006-41452097

Overlap Length: 10 INS size: 321 Genotyped: Yes

```
left  TTTTATGATTCCAATCTCCTCTTCTGGCCGGG-----AAAAGA
chrom TTTTATGATTCCAATCTCCTCTTCTGGCCGGG-----AAAAGA
right GC-----ACTCCAGCCTGGGCAACAGCGAGGCTCCGTCTCAAAAAAAAAAAAAAAAAAAAAAAAAAAAAAA
11111111*1****11**111*11*1*111**111111111111111111111111111111111111111****1*
```

```
left  AAGGATATTAAGAAGCGATGAGGGCCGGGCGCGGTGGCTCACGCCTGTAATCCCAGCACTTTGGGAGGCC
chrom AAGGATATTAAGAAGCGATGAGAA-----GGC-----ATACCTACCTTTTCCTA----
right AAAAAAAAAAAAAAAGCGATGAGAA-----GGC-----ATACCTACCTTTTCCTA----
**11*1*11**1*****222222222222**222222222222**2**22*22***222*2222
```

```
left  GAGGCGGGCGG
chrom -AGGTCTTTGC
right -AGGTCTTTGC
2***22222*2
```

Other Simple Repeat Low Complexity DNA LTR LINE SINE

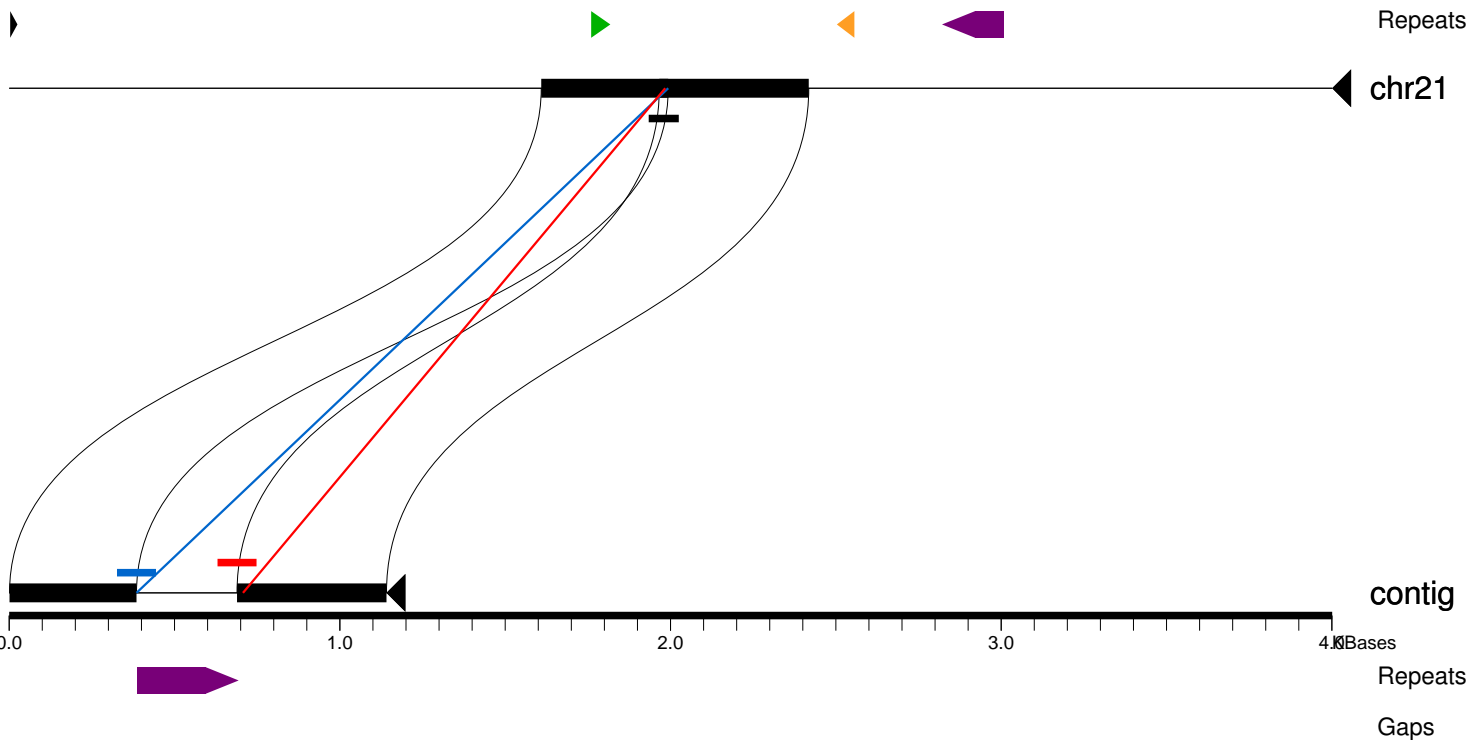





siteID: chr21\_47042382 Scaffitig5 - Breakpoint: chr21:47042368

chr21:47042314-47042420

Overlap Length: 6 INS size: 322 Genotyped: Yes

```
left  ATGTA--ACAAACCTGCACATTGTGC---ACATGTACTCCGGAACTTAACTTAAAAAAAA-----AAAG
chrom ATGTA--ACAAACCTGCACATTGTGC---ACATGTACTCCGGAACTTAACTTAAAAAAAA-----AAAG
right CTGGGCGACAGAGCGAGACTCCGTCTCAAAAAAAAAAATAAAAAAAAAATAAAAAAAAAAAAAAAAAAA*AAAG
      1**1111***1*1*111**111**11111*1*111*1*1111**1*1**111*****1111111***
```

  

```
left  CCGCGGCCGGGCGCGGTGGCTCACGCCTGTAATCCCAGCACTTTGGGAGGCCGAGGCGGGC
chrom CCACTTATCCACCTGGAGGGGGA-----TAGTTACTGAAA----GCAGAGTGAGACGT--
right CCACTTATCCACCTGGAGGGGGA-----TAGTTACTGAAA----GCAGAGTGAGACGT--
      **2*2222222*22**2**222*222222**2*22*2*2*22222*2**222***2**222
```

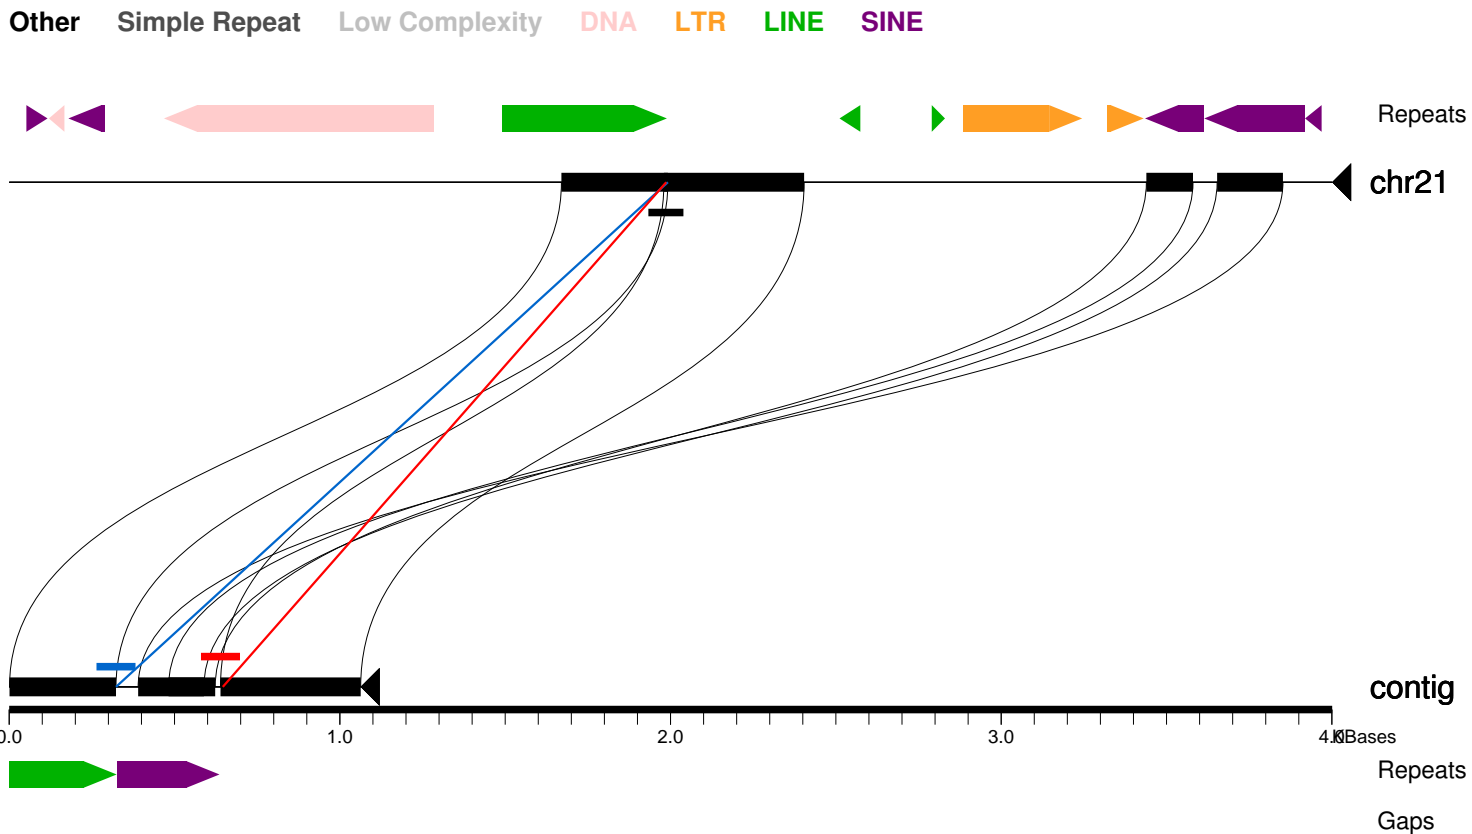

siteID: chr22\_17705310 Scaffitg1 - Breakpoint: chr22:17705292

chr22:17705133-17705468

Overlap Length: 17 INS size: 314 Genotyped: Yes

```
left -----TGAACACATGAATTAACCTTAGTTCCTCTCCAAAACCTGCACTAAAAATGAC
chrom -----AGAGATTGCAGGCTGAACACATGAATTAACCTTAGTTCCTCTCCAAAACCTGCACTAAAAATGAC
right TTTAGTAGAGACGG--GGTTTCAC-CTTG--TTAGCCAG-GATGGTCTCGATCTCCTGACCTCATGATCC
11111122222NN2 22N*11**1*1**11***1**111*1*11***1*111***11**1*11111*
```

```
left AGTGGGGAAAAAATTAAGCATATATTCACAAGGTTGAAGAAAAGCAAGAAAGGAGAAAAATAGCAAAAAA
chrom AGTGGGGAAAAAATTAAGCATATATTCACAAGGTTGAAGAAAAGCAAGAAAGGAGAAAAATAGCAAAAAA
right ACCCGCC-----TCGGCCT-----CCCAAAGT-----GCTGGGATTACAGGCGTGA-----
*111*1111111111*11**1*11111*1***1**1111*111*1*11*1***1*11*111111111111
```

```
left AACTTGGAAGATGGAAGGTACATAAAACAAGTGCTAATAATTTTTTTTTTTTTTTTTTTTTTTTGGAGA
chrom AACTTGGAAGATGGAAGGTACATAAAACAAGTGCTAATAATTTAGAAAGACAAAAAACAACAAACAAACA
right -----GCCACCGCGCCCGCCA---ACAAGTGCTAATAATTTAGAAAGACAAAAAACAACAAACAAACA
11111*11*1111*111*11**111*****111*2222222222222222222222222222*2*
```

```
left -----CGGAGTCTCGCTCTGTCGCC--CAG-GCCGGA-----CTGCGGA---CTGC---AGTGGCGC-
chrom AAAAAAACAACACTGAATCTGAAACCAGCAGTGACGAAAAGAAACCTCGGATACCTGTGAAAGTGAGGCT
right AAAAAAACAACACTGAATCTGAAACCAGCAGTGACGAAAAGAAACCTCGGATACCTGTGAAAGTGAGGCT
222222*22*22**222***222**22***2*2**2*22222*22***222***2222***22**2
```

```
left -----AATCTCGGCTCACTGCAAGCTCCGCTTC---CCGGTTTCACG---CCA
chrom GAAGGTAAGTCCAAAAGCAGGAGAAAATGGAGGAATGGCTGGAAAAGCCTTTTTAACAAAAACCT
right GAAGGTAAGTCCAAAAGCAGGAGAAAATGGAGGAATGGCTGGAAAAG-----
22222222222**2222**222*2**2*2*2222***2222211NNN11N11N 11N
```

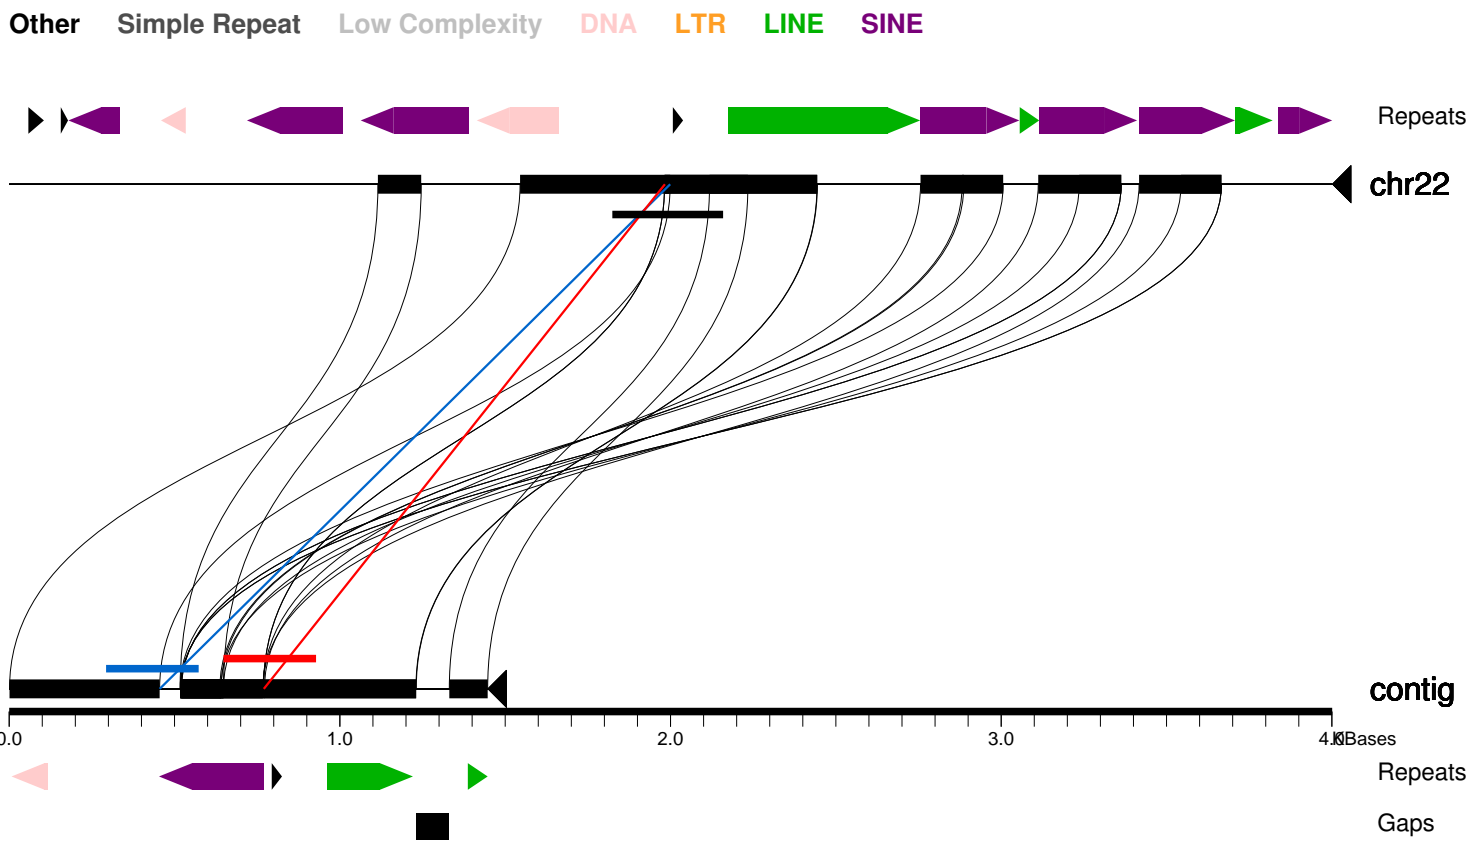

siteID: chr22\_22534127 Scafftig19 - Breakpoint: chr22:22534131

chr22:22534083-22534182

Overlap Length: 6 INS size: 310 Genotyped: Yes

```
left   CATAT-----GATAACA----CTGACTCTTTCCCTGCTGAACCACATGTAATAAAA-----CCAG
chrom  CATAT-----GATAACA----CTGACTCTTTCCCTGCTGAACCACATGTAATAAAA-----CCAG
right  TGCACTCCAGCCTGGGCGACAGGGCGAGACTCCGTCTCAAAAAGAAAAAAAAAAAAAAAAAAAAAAAAAAACAG
      111*11111111111*111***111111*****11*1*1111***11*1*111**1****1111111***
```

  

```
left   AGGGGCCGGGCGCGGTGGCTCACGCCTGTAATCCACAGCACTTTGGGAGGCCGAGGCGGGCGGATCACG--
chrom  AGGAGCTGG-----TTTAAT---AAAACCTGAGGAG-CTGACTTTTCTTTTAAAAGAA
right  AGGAGCTGG-----TTTAAT---AAAACCTGAGGAG-CTGACTTTTCTTTTAAAAGAA
      **2**2**2222222222222222*2***222*22**2*22***2*2**22222222222*2*22
```

Other Simple Repeat Low Complexity DNA LTR LINE SINE

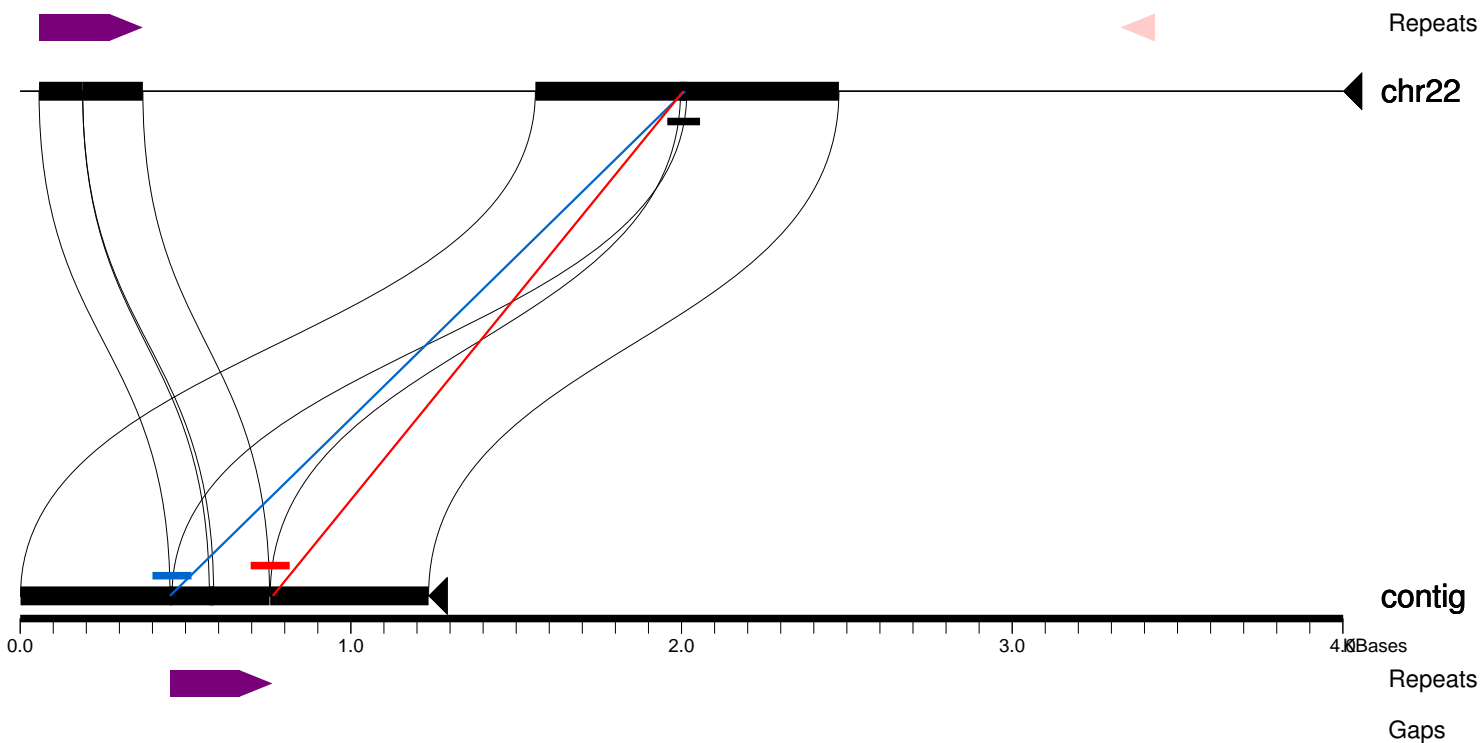

siteID: chr22\_26997607 Scafftig2 - Breakpoint: chr22:26997608

chr22:26997448-26997769

Overlap Length: 2 INS size: 316 Genotyped: Yes

left -----ACTCATTCCTGTTCATTCCTCCCAGA-AGCTCCTGATTTCCCTGAATATTCCTTGCTCCTGGATGC  
chrom CTCAGAACTCATTCCTGTTCATTCCTCCCAGA-AGCTTCTGATTTCCCTGAATATTCCTTGCTCCTGGATGC  
right TTTAGTAGAGACGGGGTT---TCACCGTTTTAGC--CGGGATGGTCTCGATCTCCTGACCTCGTG-ATCC  
N2N22N\*111\*1111\*\*\*111\*\*1\*\*1111\*\*\*1N\*1\*11\*111\*11\*1\*1\*1111\*\*\*1\*\*1\*\*1\*

left ATCCAGCCTCATCTATCCACATCAGCGCCGGCCCTTTTAGTTGATTACTCCTTCAACCCCAACTAGGCTT  
chrom ATCCAGCCTCATCTATCCACATCAGCGCCGGCCCTTTTAGTTGATTACTCCTTCAACCCCAACTAGGCTT  
right GCCC-GCCTCGGCCTCCC AAA---GTGCTGG-----GATTAC-----AGGCGT  
11\*\*1\*\*\*\*\*11\*111\*\*\*1\*111\*1\*\*1\*\*11111111111\*\*\*\*\*11111111111111111\*\*\*\*\*1\*

left AGCAGCTCCTATTTTCTCCATCTCACATTTTTTTTTTTTTTTTTTTTTTTTTTTTTTTT--TGAGA-----CG  
chrom AGCAGCTCCTATTTTCTCCATCTAACAGCTTTTTAGAGCTGATTTGTTTACACTGACCTGGAATTCCTCA  
right G--AGCCACCGCGCCCGGCCCTAACAGCTTTTTAGAGCTGATTTGTTTACACTGACCTGGAATTCCTCA  
111\*\*\*11\*1111111\*11\*11\*2\*\*\*22\*\*\*\*\*22222\*22\*\*\*2\*\*\*2222\*2222\*\*22\*22222\*2

left GAGTCTCGCTCTGTGCGCCAGGC---TGGAGTGCAGTGGCGGGATCTCGGCT-----CACTGCAAG-CT-  
chrom AAGTGTGACTCTATTCCCAGAGGAATAGAGCTCTGTTGGCTGATCCCAGGAACCAGCACTGGGAGACTG  
right AAGTGTGACTCTATTCCCAGAGGAATAGAGCTCTGTTGGCTGATCCCAGGAACCAGCACTGGGAGACTG  
2\*\*\*2\*22\*\*\*\*2\*22\*\*\*\*\*22222\*2\*\*\*22\*2\*\*2\*222\*\*\*\*\*2\*2\*2222222\*\*\*\*\*22\*\*2\*\*2

left -----CCGCCTCCCGGTTTC--ACGCCATT-CT  
chrom TGGAAGGGGCCATGGCCTTCTCTAGGAATCTGATGTTATAACC  
right TGGAAGGGGCCATGGCCTTCTCTAGGAATCTGATGTTATA---  
2222222222222222\*\*22\*\*\*22\*\*22\*\*22\*2\*22\*\*2 1N

Other Simple Repeat Low Complexity DNA LTR LINE SINE

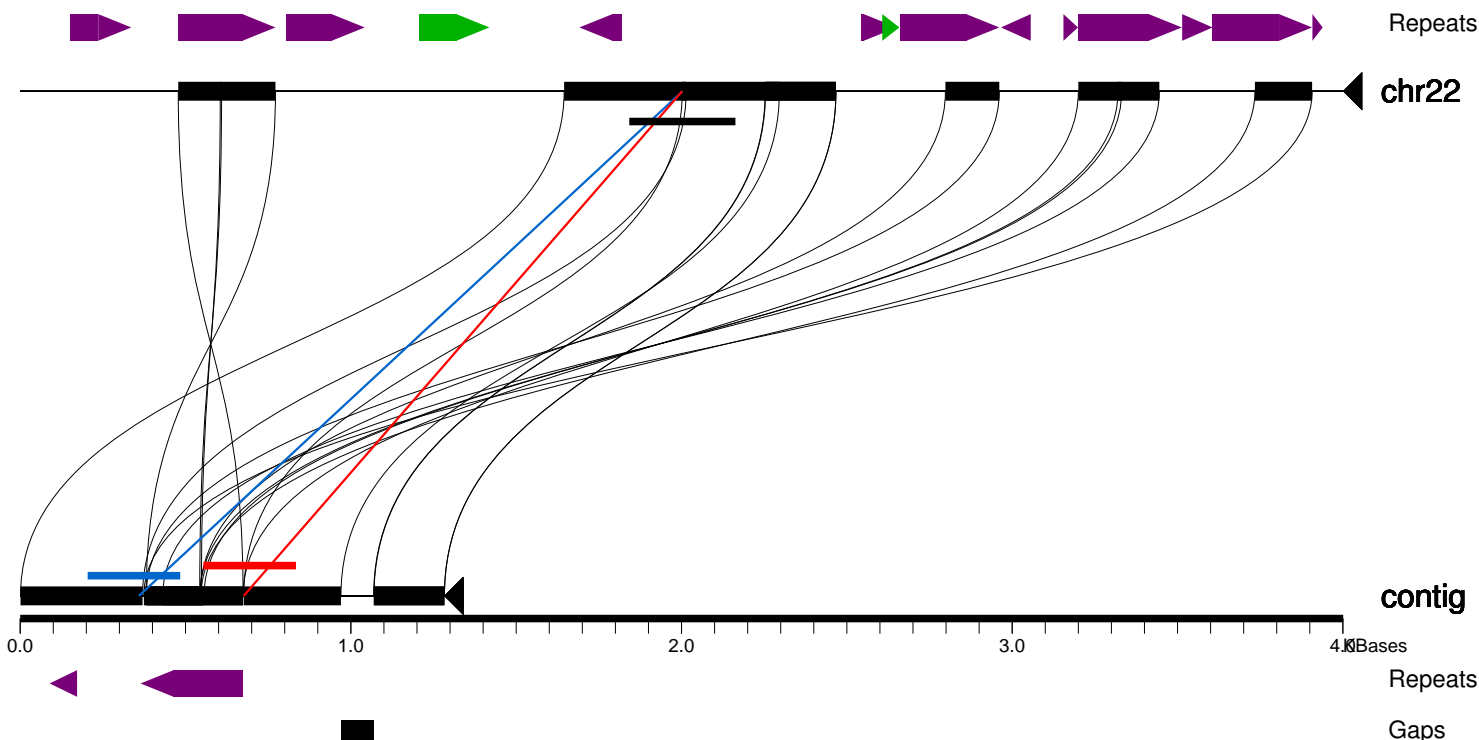

siteID: chr22\_34430606 Scafftig9 + Breakpoint: chr22:34430599

chr22:34430553-34430658

Overlap Length: 14 INS size: 314 Genotyped: Yes

```
left  TGGATCTTCC----AATCACTAGTTCCTTGG-TTTCa---TTTAG-----GTCTCAGTTCAAATGGAAct
chrom TGGATCTTCC----AATCACTAGTTCCTTGG-TTTCa---TTTAG-----GTCTCAGTTCAAATGGAAct
right TCCACCCGCTCGGCCTCCCAAAGTGCTGGGATTACAGGCGTGAGCCACCGCGCCCGGCCAAATGGAAct
      *11*1*11**111111**1*1*11*1**1**1**1**1111*1**11111*111*1*11*****
```

```
left  TTTTTTTTTTTTTTTTTTTTTTTTTTTTTGAGACGGAGTCTCGCTCTGTTGCCcAGGCCGGACT----GC
chrom TTTTACACAGA-----AGCCTTCCTCAC-CACTCAAAAACATGCCTGGAGTAGAGGC
right TTTTACACAGA-----AGCCTTCCTCAC-CACTCAAAAACATGCCTGGAGTAGAGGC
      **222222222222222222222222**2*2222**2*2*2**2222*22*2*2**2*2222**
```

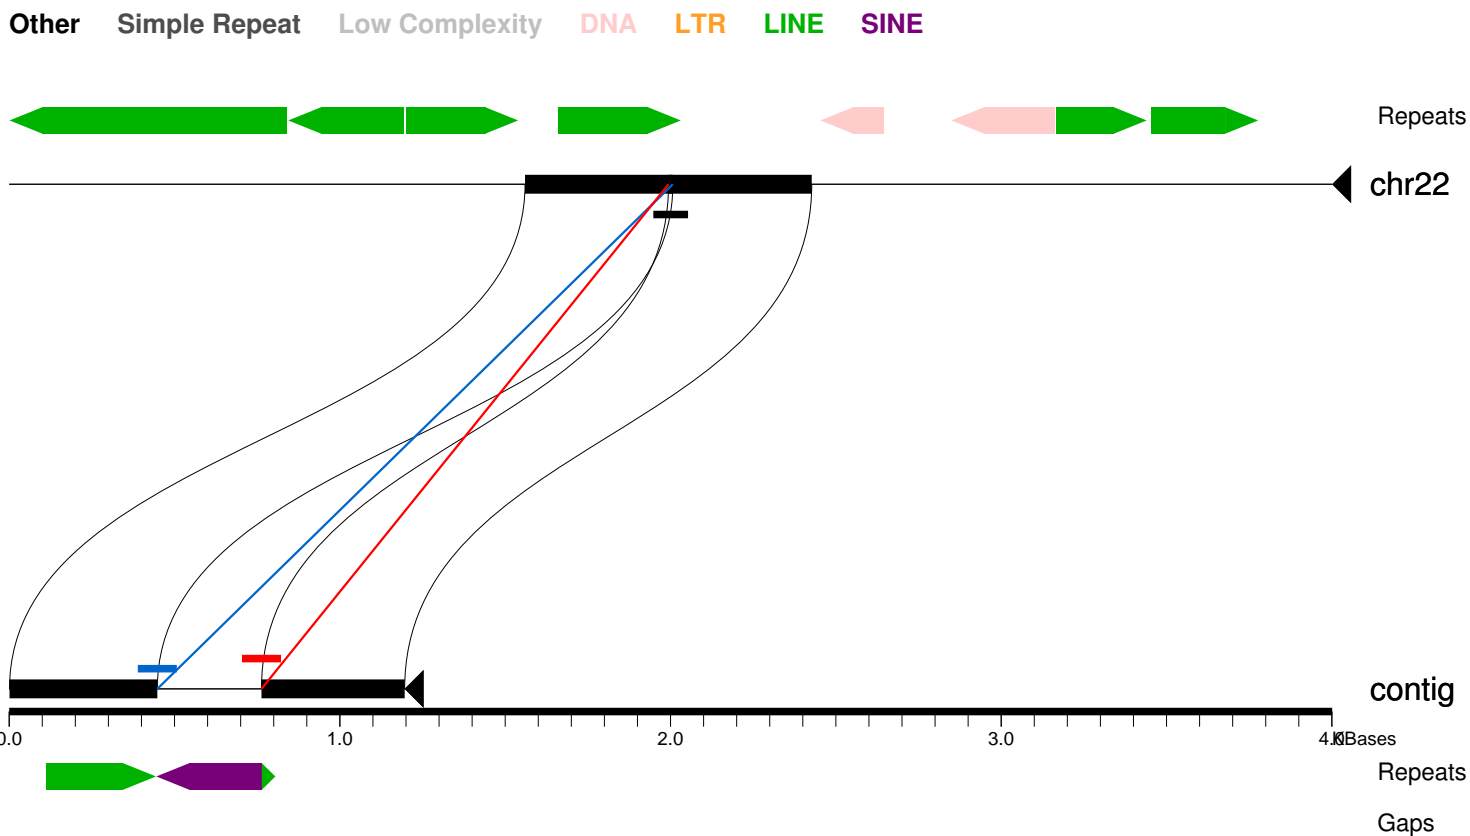



siteID: chr3\_100177251 Scafftig4 - Breakpoint: chr3:100177252

chr3:100177207-100177311

Overlap Length: 15 INS size: 296 Genotyped: Yes

```
left  AGG---TCCCATACA-----AGTCCAAAATTCAGTGGGGCAGTCATTAAATCTAAAAACCCCAA
chrom AGG---TCCCATACA-----AGTCCAAAATTCAGTGGGGCAGTCATTAAATCTAAAAACCCCAA
right CGCCACTGCACTCCAGCCTGGGCGACAGAGCGAGACTCCGTCTCAAAAAAAAAAAAAAAAAAAAAA
1*1111*1*11*1**111111111111**11*1*1*1**1**11111*111*11***111*****
```

  

```
left  AACAGGCCGGGCGCGGTGGCTCACGCCTGTAATCCAGCACTTTGGGAGGCCGAGGCGGGCGG
chrom AACAAATCTC----CTTTGACTC---CATGTCTT-----ACATTCAG-GGCACACTGATGCAA
right AACAAATCTC----CTTTGACTC---CATGTCTT-----ACATTCAG-GGCACACTGATGCAA
***22*222222*22*2***222*2***22*222222**2**22*2***22*22222**22
```

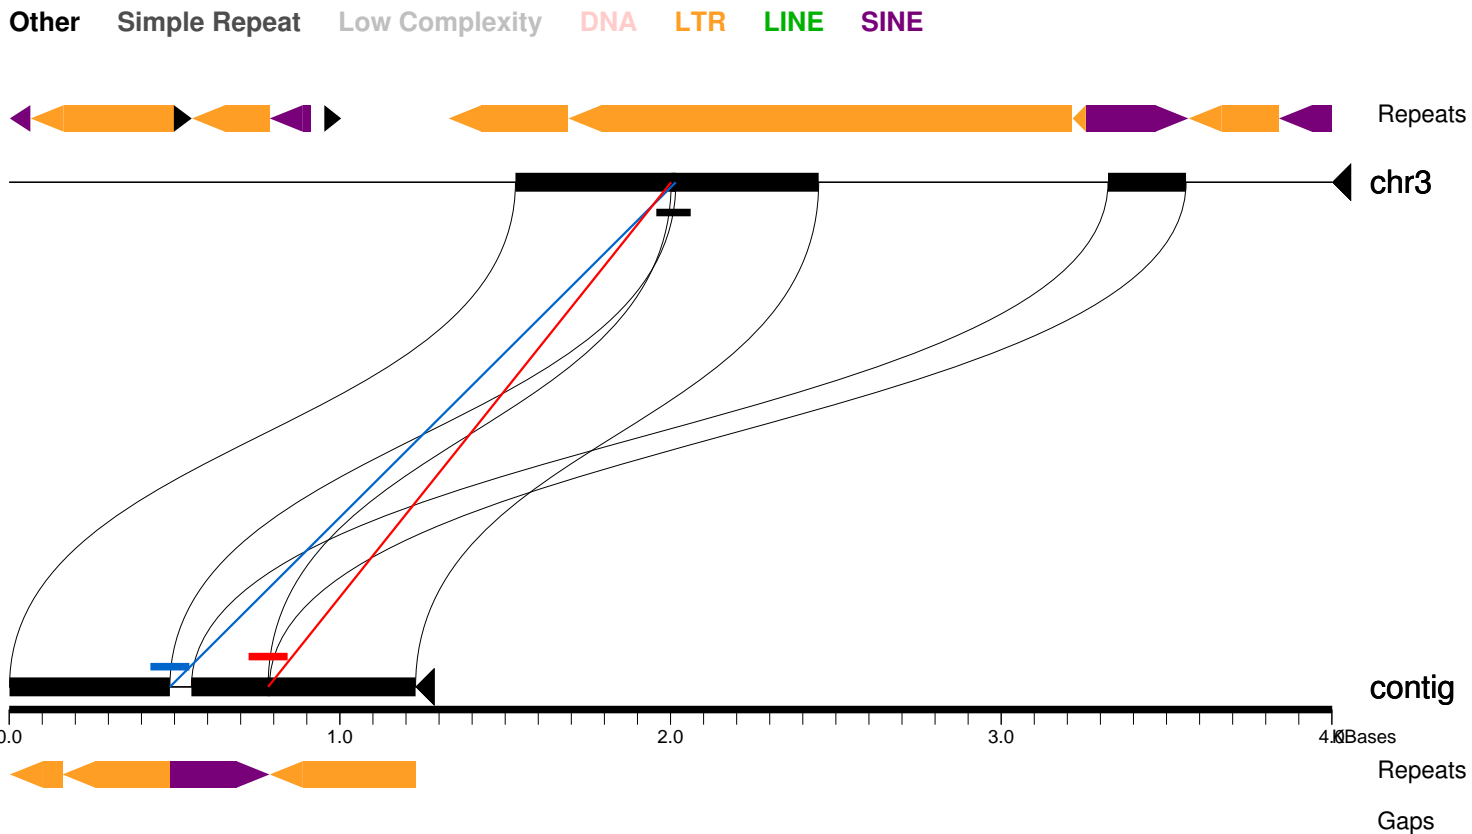



siteID: chr3\_102983911 Scafftig3 - Breakpoint: chr3:102983850

chr3:102983802-102983907

Overlap Length: 9 INS size: 80 Genotyped: Yes

```
left  A-----CTAATAAGGGAGTCTA-GTAACTTCACAGGATATGAGATCACATATAA-GAATCAATC
chrom A-----CTAATAAGGGAGTCTA-GTAACTTCACAGGATATGAGATCACATATAA-GAATCAATC
right CTCCAGCCTGGGCGACAGAGCGAGACTCCGTCTCAAAAAAAAAAAAAAAAAAAAAAAAAAAAAA-GAATCAATC
      11111111111111111111*1*111**1***1**11**11*111*1*11*1*11*1*11*1*1*1**1*****
```

  

```
left  CCAAGATTGCGCCACTGCACTCCAGCCTGGGCGACAGAGCGAGACTCCGTCTCAAAAAAAAA
chrom AC---ATTT--CCA-TGTACTAAAAATATGAAC-AC-GTGGAAAAACAAA-----ATTAAAAATC
right AC---ATTT--CCA-TGTACTAAAAATATGAAC-AC-GTGGAAAAACAAA-----ATTAAAAATC
      2*222***222***2**2***22*222**22*2**2*2*22*2**22222222*22***22
```

Other Simple Repeat Low Complexity DNA LTR LINE SINE

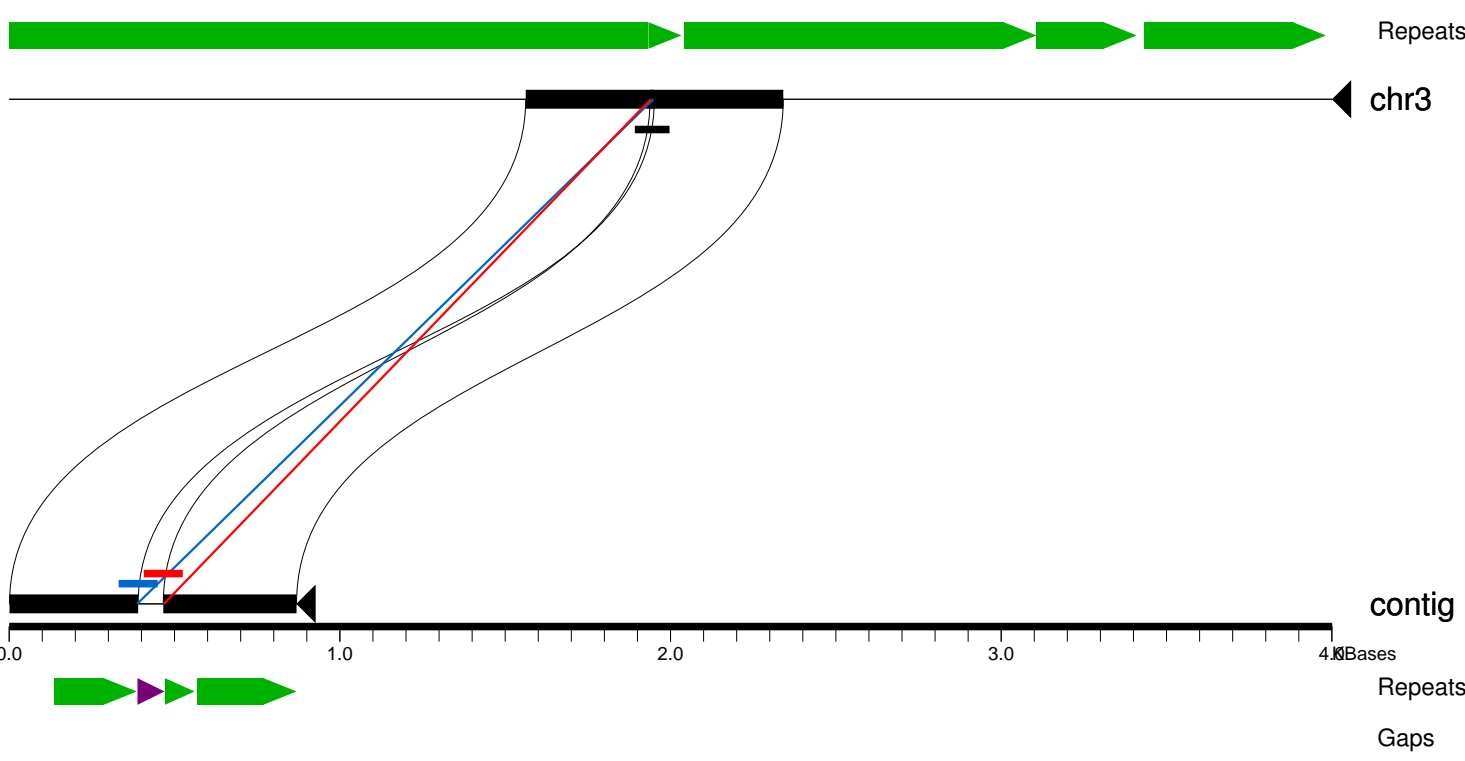

siteID: chr3\_103419427 Scaffitig2 + Breakpoint: chr3:103419423

chr3:103419377-103419482

Overlap Length: 14 INS size: 296 Genotyped: Yes

```
left    GAGCCTCTAATTACATTTTCACAAACTGATTGATAGATTATT----TTAT-----GCCTG
chrom   GAGCCTCTAATTACATTTTCACAAACTGATTGATAGATTATT----TTAT-----GCCTG
right   CCGCC-CGCCT--CGGCCTCCCAAAGTGCTGG---GATTACAGGCGTGAGCCACCGCGCCCGGCCGCCTG
11***1*111*11*1111**1****1**1*1*111*****111111*1*111111111111111111*****
```

```
left    TTCTCTTTTFTTTTTTTTTTTTTTTGAGACGGAGTCTCGCTCTGTCTGCCAGGCTGGAGTGCAGTGGCG
chrom   TTCTCTTTTAAAGACACTTTGTTGAACAATTAACATTGAACT----CACAGCCAACAGC-----
right   TTCTCTTTTAAAGACACTTTGTTGAACAATTAACATTGAACT----CACAGCCAACAGC-----
*****22222222***2**22*2*222*222*2*22**2222*2***2*222**22222222222
```

Other Simple Repeat Low Complexity DNA LTR LINE SINE

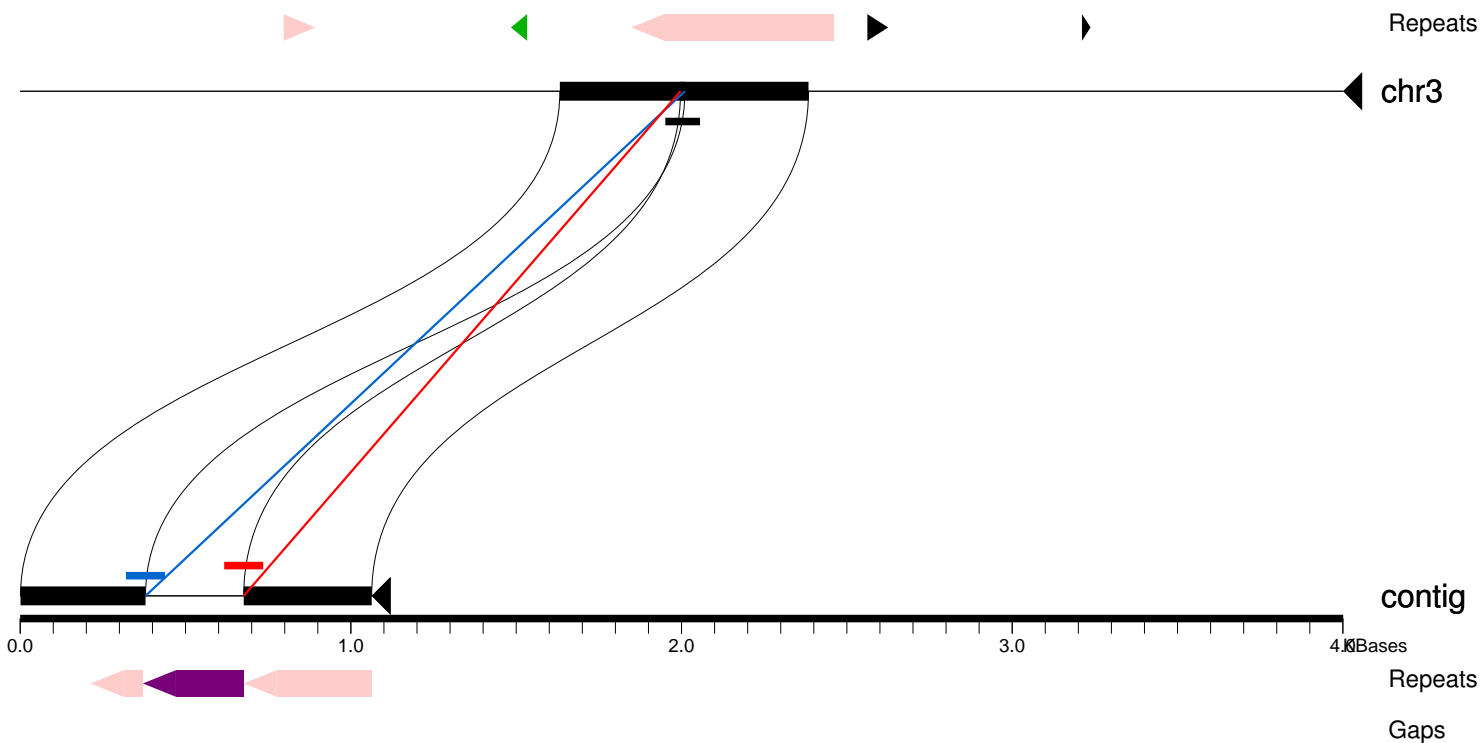

siteID: chr3\_103453375 Scafftig3 + Breakpoint: chr3:103453381

chr3:103453337-103453440

Overlap Length: 16 INS size: 297 Genotyped: Yes

```
left  A-----ATTTTATAGTCTTATTAATTTAGGAGTCAA--ATGATTGAAATTTGAGTAAAAATTT
chrom A-----ATTTTATAGTCTTATTAATTTAGGAGTCAA--ATGATTGAAATTTGAGTAAAAATTC
right CCGCCCGCCTCGGCCTCCCAAAGTGCTGGGATTACAGGCGTGAGCCACCGCGCCCGGCCGAGTAAAAATTC
      11111111111111111111*111*1***11*111*1*11***1**1*111*1111111111111******2

left  TTTTTTTTTTTTTTTTTTTTTTGAGACGGAGTCTCGCTCTGTGCGCCAGGCTGGAGTGCAGTGGC
chrom TTTTAAAACATTTGATTAAGGGA-----AGTATAAAATT----CCCATCATTGAG-----GAT
right TTTTAAAACATTTGATTAAGGGA-----AGTATAAAATT----CCCATCATTGAG-----GAT
      ***22222***22**2222**22222***2*22222*2222***222*2***222222*22
```

Other Simple Repeat Low Complexity DNA LTR LINE SINE

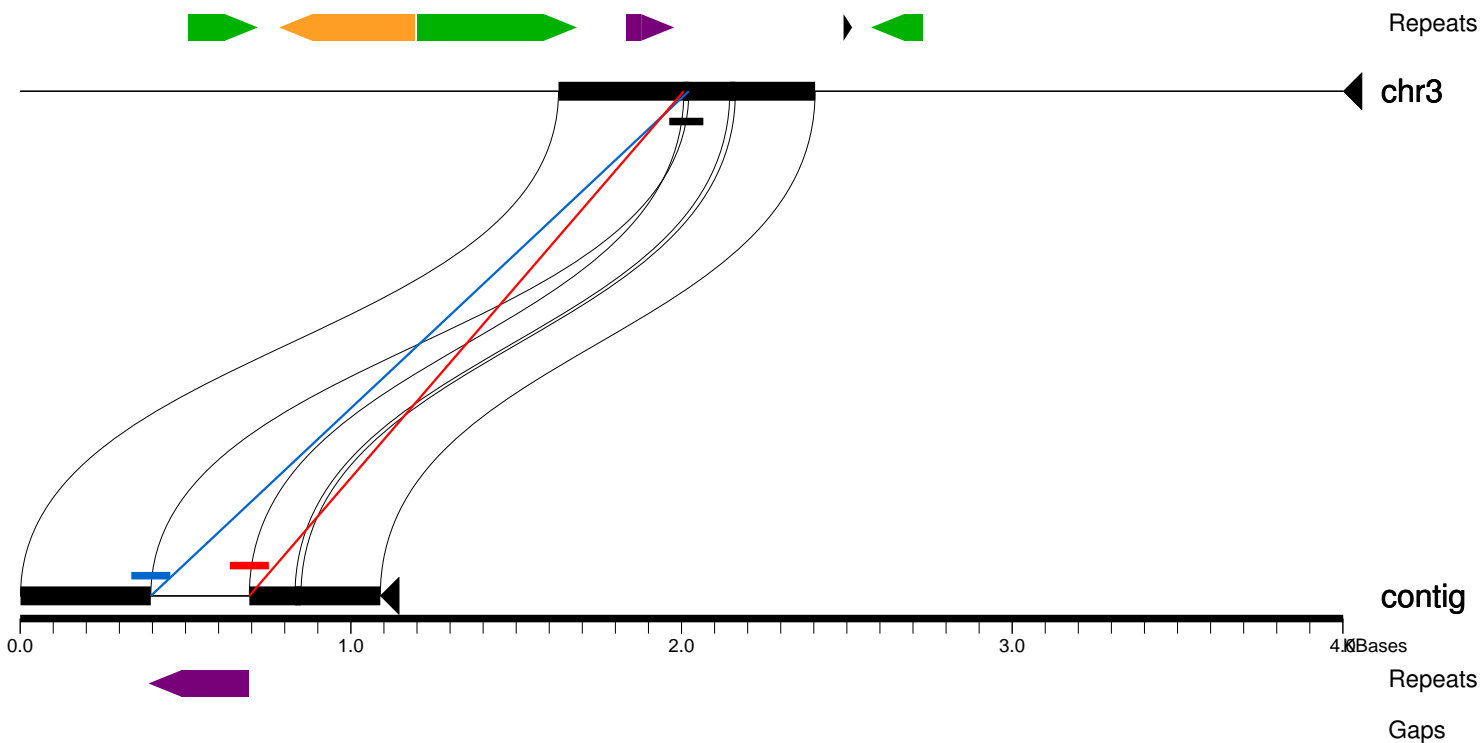

siteID: chr3\_105333891 Scaffitig1 - Breakpoint: chr3:105333901

chr3:105333855-105333960

Overlap Length: 14 INS size: 153 Genotyped: Yes

```
left  ----CAGCAGCAGGCATTTTTGTGAGATTTCCATGTGCTAGGCACTTTAT-----AAAGATTGGC
chrom ----CAGCAGCAGGCATTTTTGTGAGATTTCCATGTGCTAGGCACTTTAT-----AAAGATTGGC
right GCGACAG-AGCGAGACTCCGTCTCAAAAAAAAAAAAAAAAAAAAAAAAAAAAAAAAAAAAAAA*AAAGATTGGC
      1111***1***11*11*111*1*1*1*11111*111111*111*1111*111111111111******
left  TCATCCAGCTACTCGGGAGGCTGAGGCAGGAGAATGGCGTGAACCCG-GAAGGCGGAGCTTGCA
chrom TCATTTAA-TAATCAATA-----CAACAAAATGAGGTAAATATTTGTACTCTGA--TT---
right TCATTTAA-TAATCAATA-----CAACAAAATGAGGTAAATATTTGTACTCTGA--TT---
      ***22*22**2**222*22222222**22*2****22**2**22222*2*22*2**22**222
```

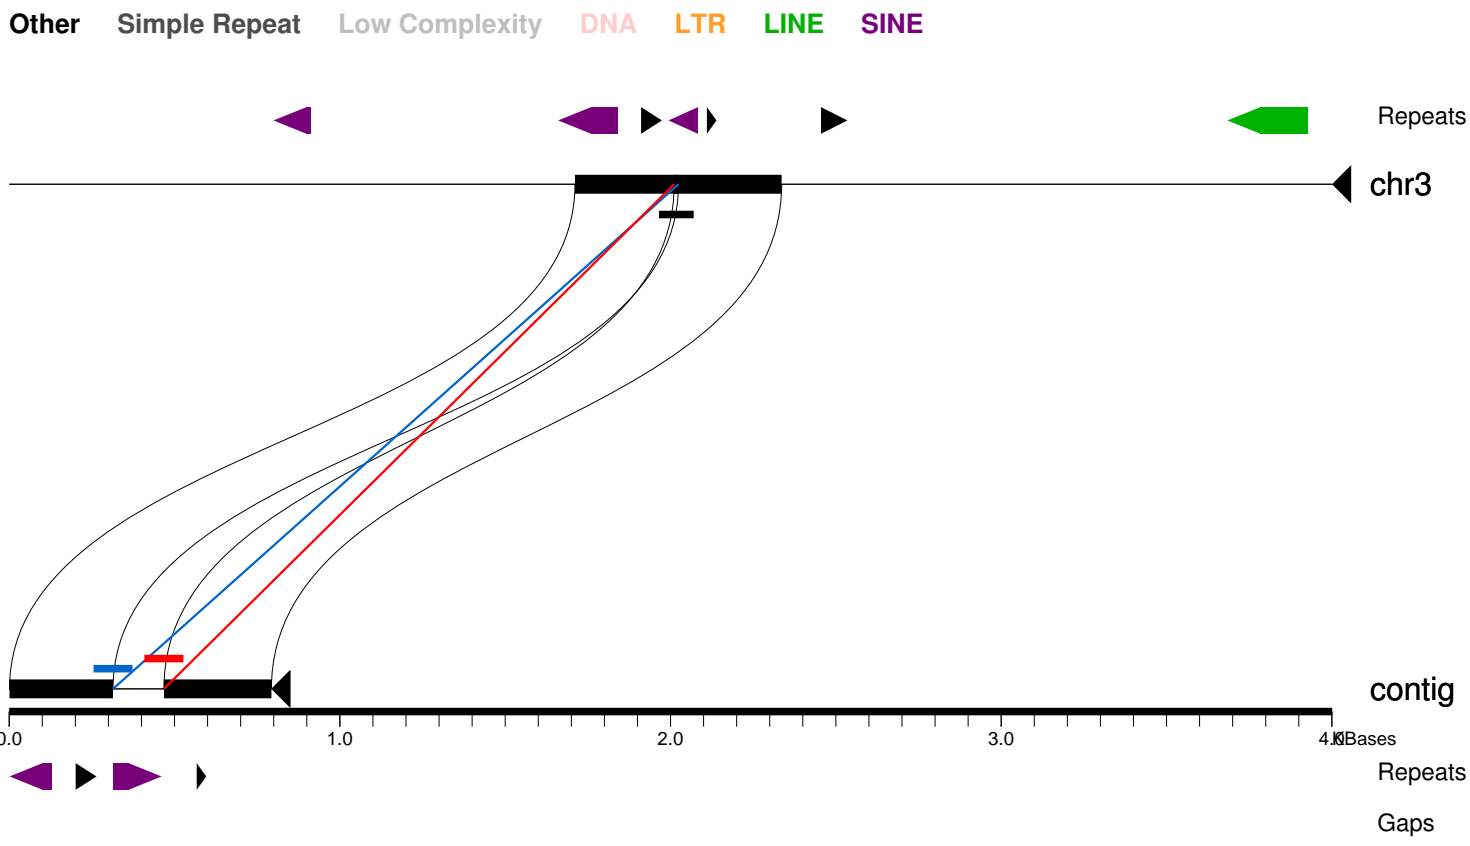

siteID: chr3\_106289180 Scafftig4 + Breakpoint: chr3:106289189

chr3:106289029-106289361

Overlap Length: 13 INS size: 312 Genotyped: Yes

```
left  A-----ACAGCTCTGTGACAGACAGTGGTGGAGATTTTTCCTTGAAGCAGAAATCCAGAGT
chrom ATGGTAGTGAATTTCAACAGCTCTGTGACAGACAGTGGTGGAGATTTTTCCTTGAAGCAGAAATCCAGAGT
right GCG-----TGAAC-----CCGGGAA-----GCGGAGCTT-----GCAGTGAGCC-GAGA
1N2          2N2**1111*1*1**111111111*1****1**111111111****11*1**1***1
```

```
left  TCTCTTTTGTGCA-TCTTCAGTTTGTGAGATGCCCATTTAGAAACTCACATGCAGATCCTATATGTGGAATTT
chrom TCTCTTTTGTGCA-TCTTCAGTTTGTGAGATGCCCATTTAGAAACTCACATGCAGATCCTATATGTGGAATTT
right TTGCGCCACTGCAGTCCGCAGTCCGGCCTGGGCGACAGA-----GC-GAGACTCCGTCTCAAAAAA
*11*11111****1**11****11*111**11*111**111111111**1**11**111*1*11**111
```

```
left  GACATATGGATTTGTAGTTCTAAAAAAGGGTTCAAGGGCCGGG--CGTGGTGGCTCACGCCTGTAATCCCA
chrom GACATATGAATTTGTAGTTCTAAAAAAGGGTTCAACTGCTGAAACATATCTGATAATCATCAGAATGCAG
right AAAAAAAAAAAAAAAAAA----AAGGGTTCAACTGCTGAAACATATCTGATAATCATCAGAATGCAG
1*1*1*112*11111*11111******2222*2*222*2*2222*2*2*222222***2*22
```

```
left  GCACTTTGGGAGGCC----GAGGC-----GGTGGATCATGAGGTCAGGAGATC-----
chrom GTAATACTTAAAGCCAGAAGAGCCTCATCTTAAAAAAGAGGGTCTATAATAAAAAATAGCAAATTTTATT
right GTAATACTTAAAGCCAGAAGAGCCTCATCTTAAAAAAGAGGGTCTATAATAAAAAATAGCAAATTTTATT
*2*2*2222*2***2222***2*2222222222222222****22**2**2*2222**2*2**222222
```

```
left  --GAGACCATCCT--GGCTAACA--AGGTGAAACCCCGTCTCTACTAAA-----
chrom TTGTGGTTATGATATGCCTAACACTCACCT-AAAGGCTTTTCCATGTTATGTTT
right TTGTGGTTATGATATGCCTAACACTCACCT-AAAGGCTTTTCCATGT-----
22*2*222**22*22*2*****22*22*2**22*22*2*2*222N1
```

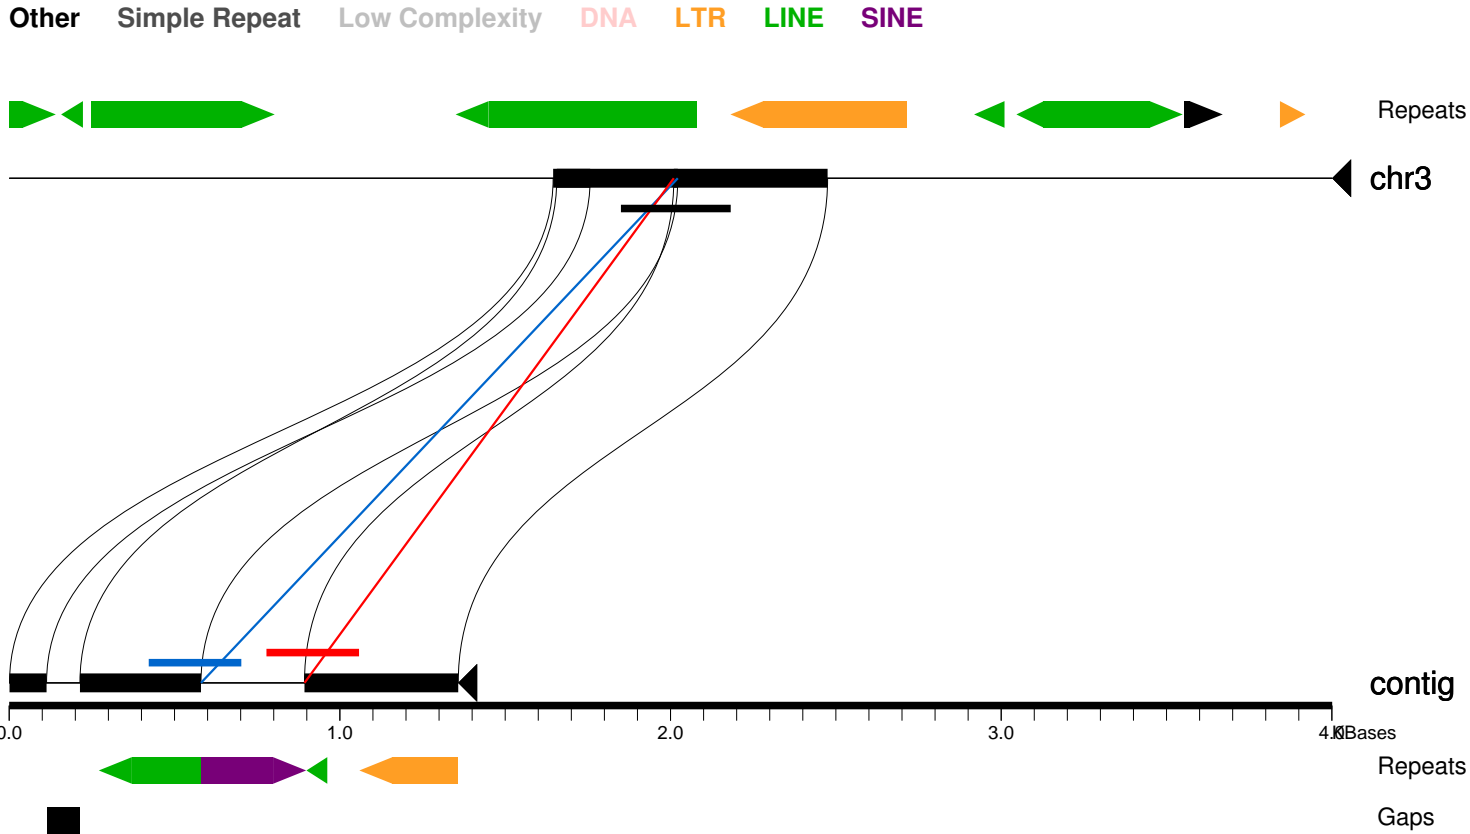

siteID: chr3\_108120757 Scafftig1 - Breakpoint: chr3:108120740

chr3:108120691-108120799

Overlap Length: 11 INS size: 324 Genotyped: Yes

```
left  AC-AGAGTC-----AAGAAATCTTTAAAAATGAAAACCTCCCTCAAGTACATTCTTTAAGAAACATGA
chrom AC-AGAGTC-----AAGAAATCTTTAAAAATGAAAACCTCCCTCAAGTACATTCTTTAAGAAACATGA
right GCGAGACTCCGTCTCAAAAAAAAAAAAAAAAAAAAAAAAAAAAAAAAAAAAAAAAAAAAAAAAAAAGAAACATGA
      1*1***1**1111111111**1***11111****11****11111111**11*1*111111*****
```

  

```
left  GCCGGGCGCGGTGGCTCACGCCTGTAATCCCAGCACTTTGGGAGGCCGAGGCGGGCGGA
chrom TGCATTCAGGA---CCAAGGGCAATATAGGAAGAAGT-----ACCTTCTTTTTCCTA
right TGCATTCAGGA---CCAAGGGCAATATAGGAAGAAGT-----ACCTTCTTTTTCCTA
      22*222*22*2222*22*2*2*22**22222**2*2*22222222**22222222*22*
```

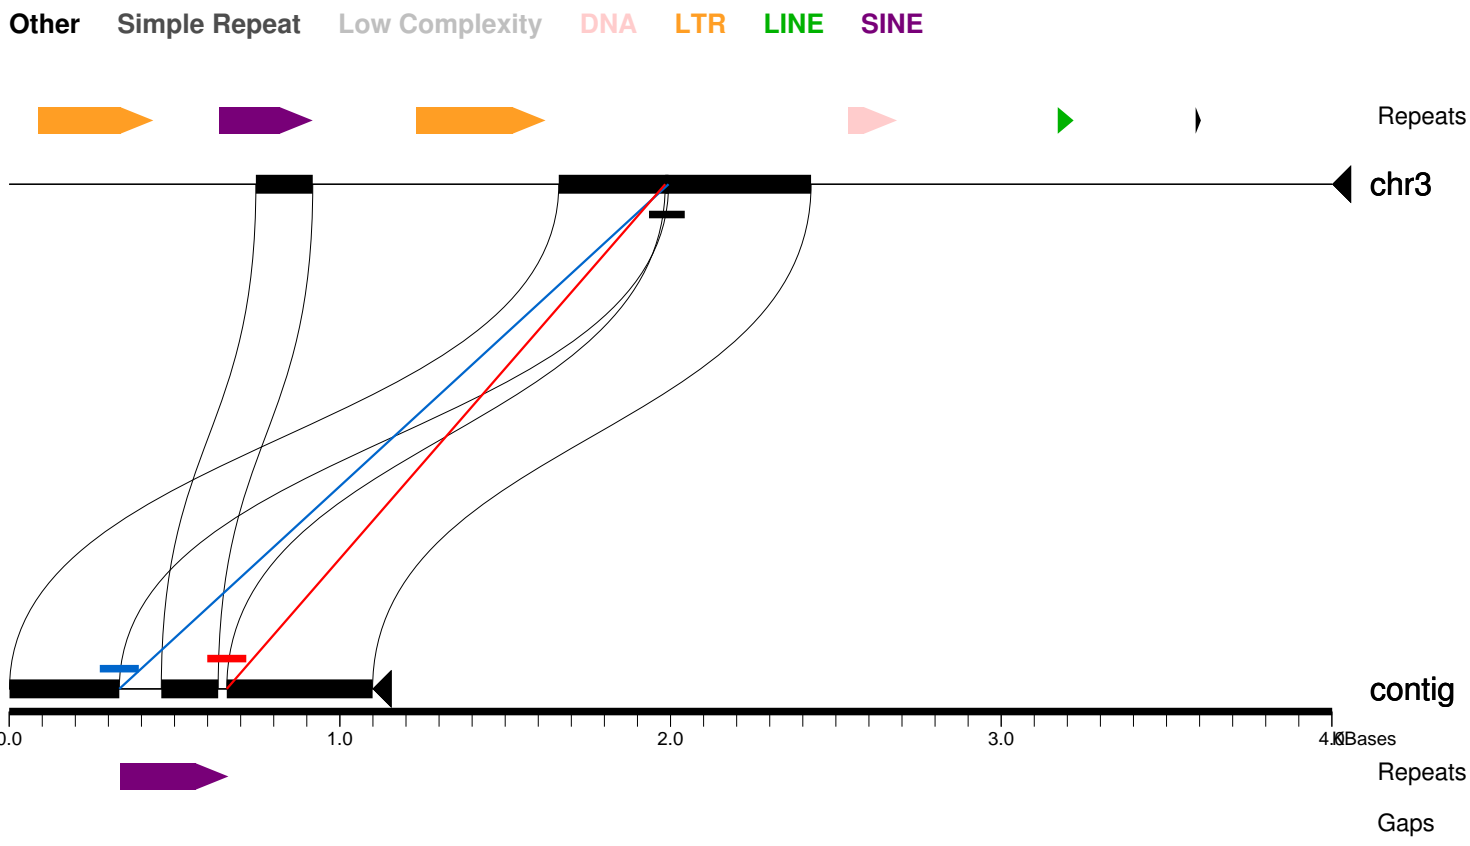



siteID: chr3\_109728171 Scafftig1 - Breakpoint: chr3:109728145

chr3:109728101-109728204

Overlap Length: 16 INS size: 277 Genotyped: Yes

```
left  CTGAAGC---ATATTTACATGGAGACTCAAGAATCTGTTAGACTGTT-----AGAAAATACAC
chrom CTGAAGC---ATATTTACATGGAGACTCAAGAATCTGTTAGACTGTT-----AGAAAATACAC
right CCTGGGCGACAGAGCGAGACTCCGTCTCAAAAAAAAAAAAAAAAAAAAAAAAAAAAAAAAAAAGAAAATACAC
      *1111**111*1*111*1*1111*1*****1**111111*1*11111111111111111******
```

```
left  TGTAACCTTTGGGAGGCAGAGGCGGGCGGATCATGAGGTCAGGAGATTGAGACCATCCTGGCTAA
chrom TGTAAC-----GAGGAGAAC--ACCACAAAGATACTCC-TTGAGAAGAGCAATCCCAA
right TGTAAC-----GAGGAGAAC--ACCACAAAGATACTCC-TTGAGAAGAGCAATCCCAA
      *****2222222222222222****2*22*22*2**22*2*22*22222****22*2*2222*2**
```

Other Simple Repeat Low Complexity DNA LTR LINE SINE

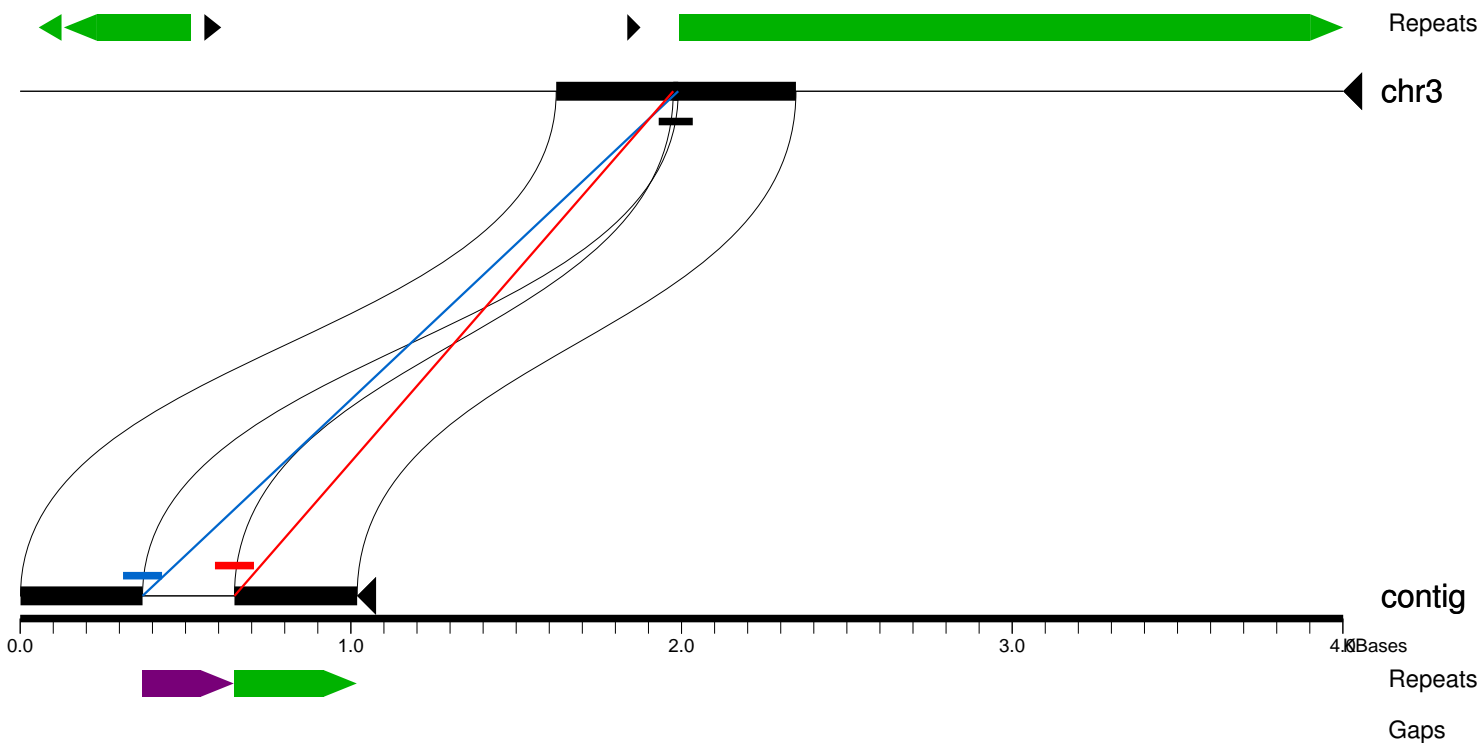

siteID: chr3\_110113837 Scafftig2 - Breakpoint: chr3:110113835

chr3:110113786-110113891

Overlap Length: 11 INS size: 303 Genotyped: Yes

```
left  C-----AGTAAAGCAAGTCACACATATTTTTTTTTT-GTTTCCAATGCATATAAA--AGTTATGT
chrom C-----AGTAAAGCAAGTCACACATATTTTTTTTTT-GTTTCCAATGCATATAAA--AGTTATGT
right CTGCAGTCCGCAGTCCGGCCTGGGCGACAGAGCGAGACTCCGTCTCAAAAAAAAAAAAAAAAAAAGTTATGT
      *11111111111***111**11*1111***1*1111111*11**1**11**111*1*1***11*****
```

```
left  TACGCCGGGCGCGGTGGCTCACGCCTGTAATCCAGCACTTTGGGAGGCCGAGGCGGGTGA
chrom TACACTATATG-GTAGCCTATTGAGTGTAA-----AAT----GATACC-ATGTCTAAAAA
right TACACTATATG-GTAGCCTATTGAGTGTAA-----AAT----GATACC-ATGTCTAAAAA
      **2*22222*2*22*2**22*22*****222222*2*222**22**2*2*222222*
```

Other Simple Repeat Low Complexity DNA LTR LINE SINE

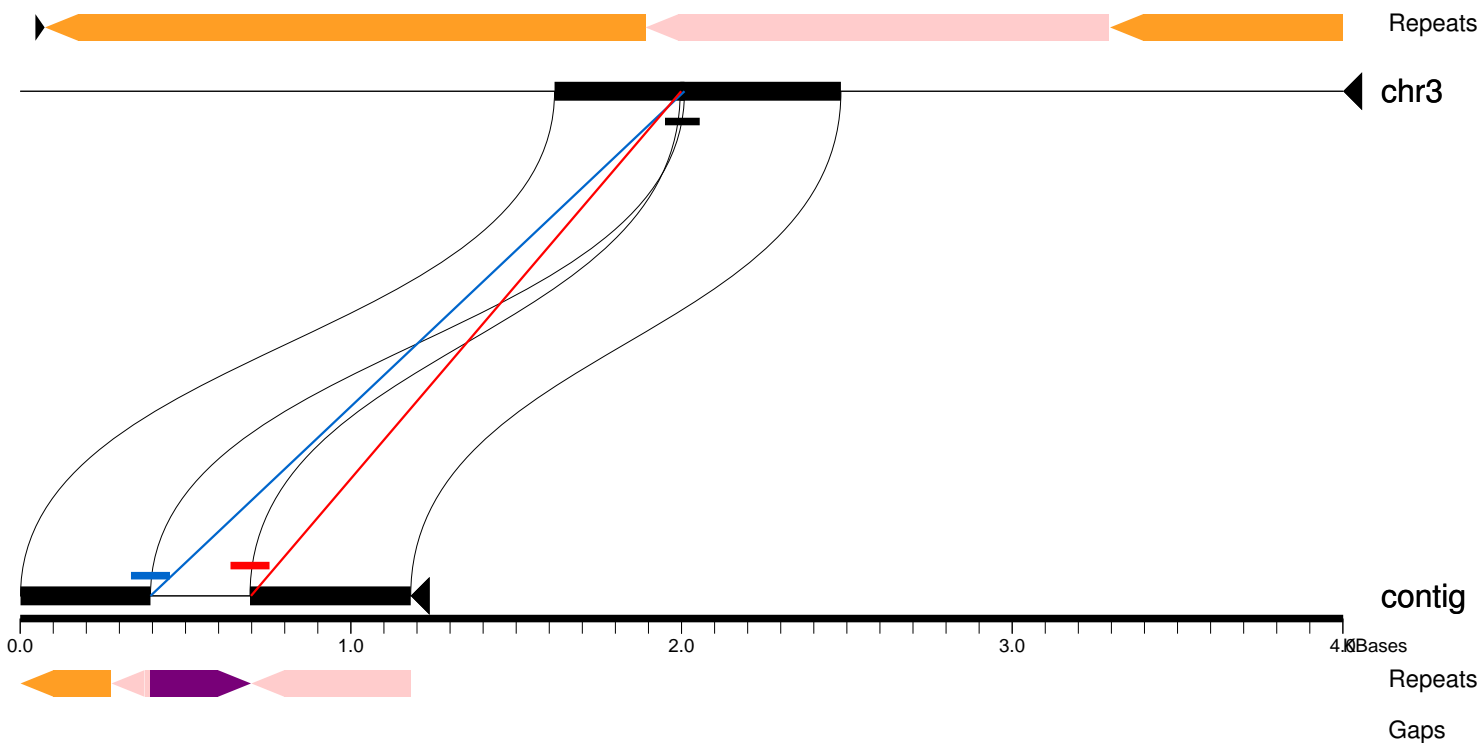

siteID: chr3\_110413402 Scafftig2 + Breakpoint: chr3:110413394

chr3:110413234-110413555

Overlap Length: 0 INS size: 282 Genotyped: Yes

```

left  --GGAAGATGTAAGAAAAATAAAATAAATAAAAAACATGCTCTGTAGGAAAAGAAATTAAGAGTTGTAG--
chrom TTGGAAGATGTAAGAAAAATAAAATAAATAAAAAACATGCTCTGTAGGAAAAGAAATTAAGAGTTGTAG--
right GT---ATTTTTAGTAGAGATGGGATTTCTCCATGTTGGTCAGGCTGGTCTCGAACTCCCAGCTCCACCC
      N2111*11*1**11*1*1*1111**111*11*11111*1111*11**1111***1*111**11*11*111

```

```

left  -ATTATGAAGTGATGATTTGAATAGATTT--TGCA-GACTGAAGATTCTTGGGTATTGCTAATGTCTACA
chrom -ATTATGAAGTGATGATTTGAATAGATTT--TGCA-GACTGAAGATTCTTGGGTATTGCTAATGTCTACA
right CACCTTGGCCTCCCAGGACTGTTGGGATTTACAGGCATGAGCCACAGCGCTTGGCCCCCCTGTTTTTTTTT
      1*111**111*1111*11*11111***1111***1**111*11111***111111**11*1*1*111

```

```

left  TCCATTTGGTATGTTGCAAGTTTTTACTTT--GCAG-----TGGCGCAATCTC-----GGCTCACTGCA
chrom TCCATTTGGTATGTTGCAAGTTTTTACATATATATATATATGTGTAAATATGTATATATGTGTAAATATA
right AACAAATGAGAAATAAGAAAAGTGA--TATGTATATATATGTGTAAATATGTATATATGTGTAAATATA
      11**11**11*11*111*111*11**111*11*1N*22*2*222222**2222**2*22222222*22*2*2*22*

```

```

left  -----ACCTCTGCCTCC-----CAGGT---TCAAGC---GATTCTCCTCCCTCAGCCTCCCAA-----G
chrom TATGTATATATGTATAAAAATACATCTATATCTAGTATAGAGTATTAGAATTAAATTTCTTAATTTACTTTG
right TATGTATATATGTATAAAAATACATCTATATCTAGTATAGAGTATTAGAATTAAATTTCTTAATTTACTTTG
      22222*22*2**22*222222**22*222**2**2222**2*2*222222*2*222**22**2222222*

```

```

left  TGGCTGGAATTACAGGCATGGGCCACCATACTTGGCTA--ATTTT-GT
chrom TGAATAGACTGCTTACCCTGTGTTTCAAATGTTATAACAGAAATTTTAGT
right TGAATA-----
      **22*211N1N1NNNNN1N1N1N1NNN1N1NNN1  11111  11

```

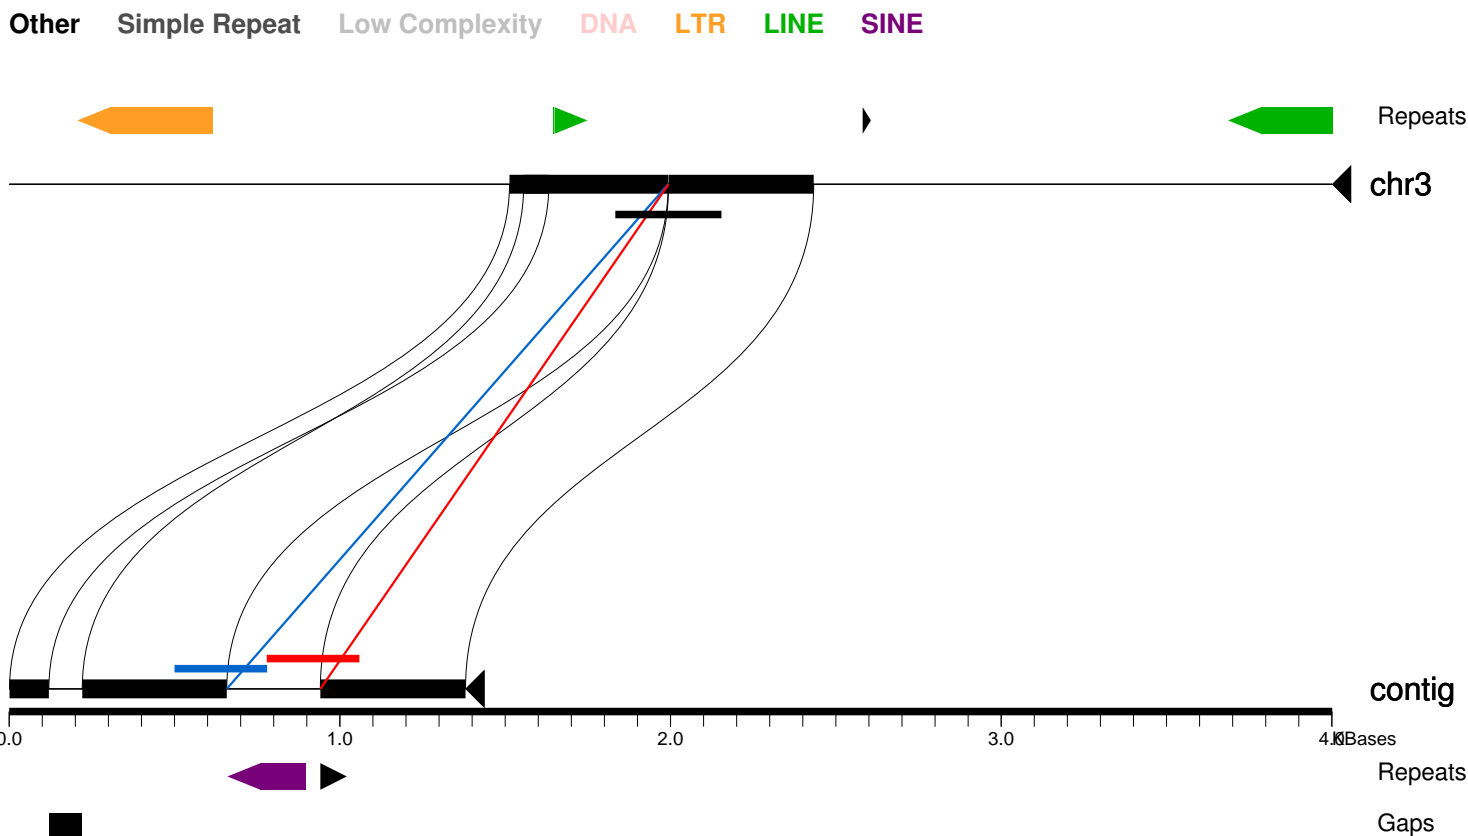

siteID: chr3\_110987485 Scafftig7 - Breakpoint: chr3:110987468

chr3:110987419-110987527

Overlap Length: 11 INS size: 296 Genotyped: Yes

```
left  GCACTTATGTATTGAAGTGTGTCTCTTCAAAGGCAG---CTGCCTCAATGT-----AAGAAATGT
chrom GCACTTATGTATTGAAGTGTGTCTCTTCAAAGGCAG---CTGCCTCAATGT-----AAGAAATGT
right GCGCCACTGCACTCCAGCCTGGGCGA--CAGAGCGAGACTCCGTCTCAAAAAAAAAAAAAAAAAAAGAAATGT
      **1*111**1*1*11**11**11*1111**1**11**111*1*1*****111111111111*****
```

```
left  GGGGGCCGGGCGCGGTGGCTCACGCCTGTAATCCCAGCACTTTGGGAGGCCGAGGCGGGCG
chrom GGAAAAAGTCATGTGGAAGAGAACCAATGTGC-CCCAG----TTGGCAGATCTAGTT-----
right GGAAAAAGTCATGTGGAAGAGAACCAATGTGC-CCCAG----TTGGCAGATCTAGTT-----
      **222222222*2**22*222**222***222*****2222*****2**22*2**2222222
```

Other Simple Repeat Low Complexity DNA LTR LINE SINE

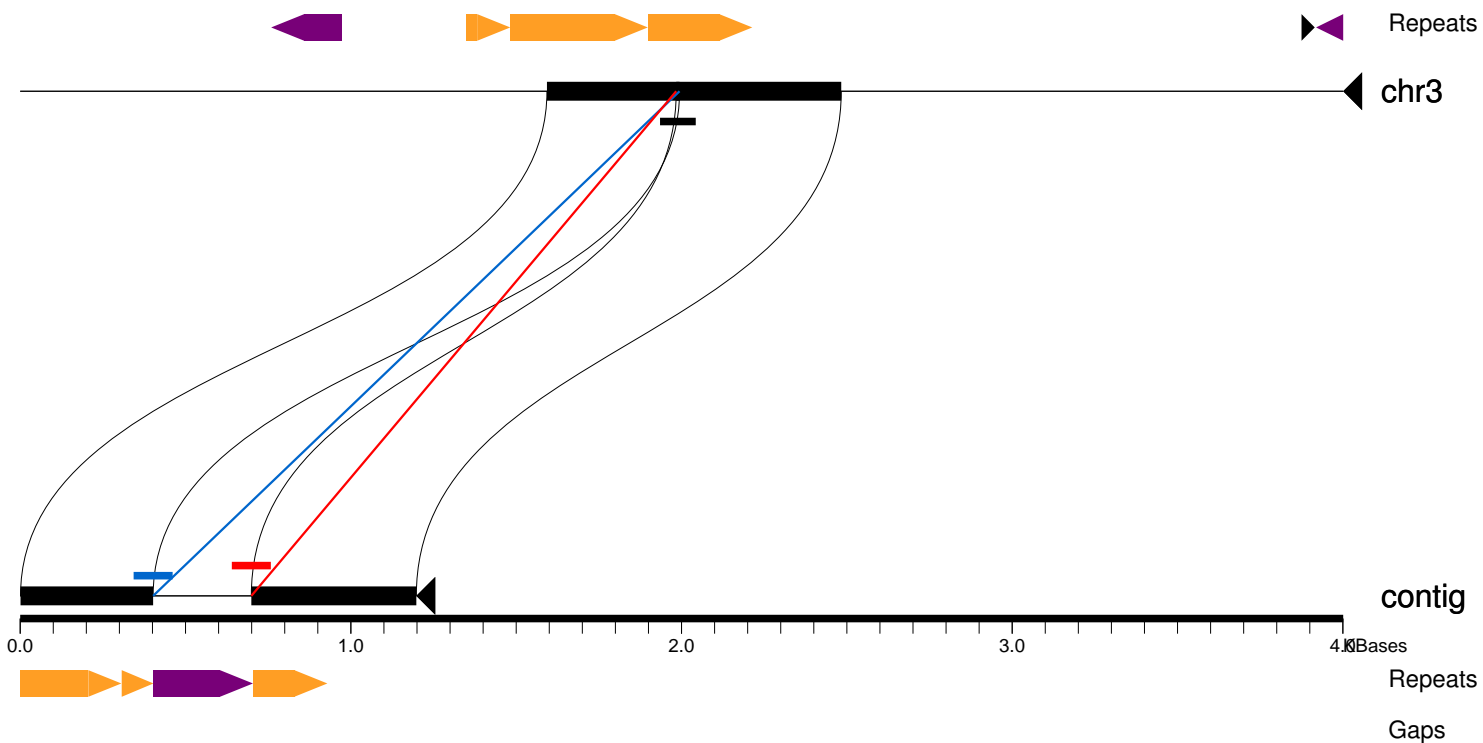

siteID: chr3\_111226375 Scaffitg1 + Breakpoint: chr3:111226364  
 chr3:111226316-111226423  
 Overlap Length: 12 INS size: 495 Genotyped: No

```

left  AATAGTTGTCTTCTGGAGCTAGACAGTTC-----ATTTAAAAGTTTATATGCA--AAAATAAAATC
chrom AATAGTTGTCTTCTGGAGCTAGACAGTTC-----ATTTAAAAGTTTATATGCA--AAAATAAAATC
right NNNNNNNNNNNNNNNNNNNNNNNNNNNNNNNNNNNNNNNNNNNNNNNNNNNNNNNNNNNNNNNNNNNNN
      11111111111111111111111111111111111111111111111111111111111111111111
      *111***11*1*1**11*11******

left  A-GGCCGGGCGCGGTGGCTCACGCCTGTAATCCCAGCACTTTGGGAGGCCGAGGCGGGGTGG
chrom AAGGAATAACAAATAGGAAAACAC---TAAACAAAGCAGTAAGGCAGGACTA-----
right AAGGAATAACAAATAGGAAAACAC---TAAACAAAGCAGTAAGGCAGGACTA-----
      *2**22222*22222**222**2*222***2*22***2*22**2**2*2*222222222
  
```

Other Simple Repeat Low Complexity DNA LTR LINE SINE

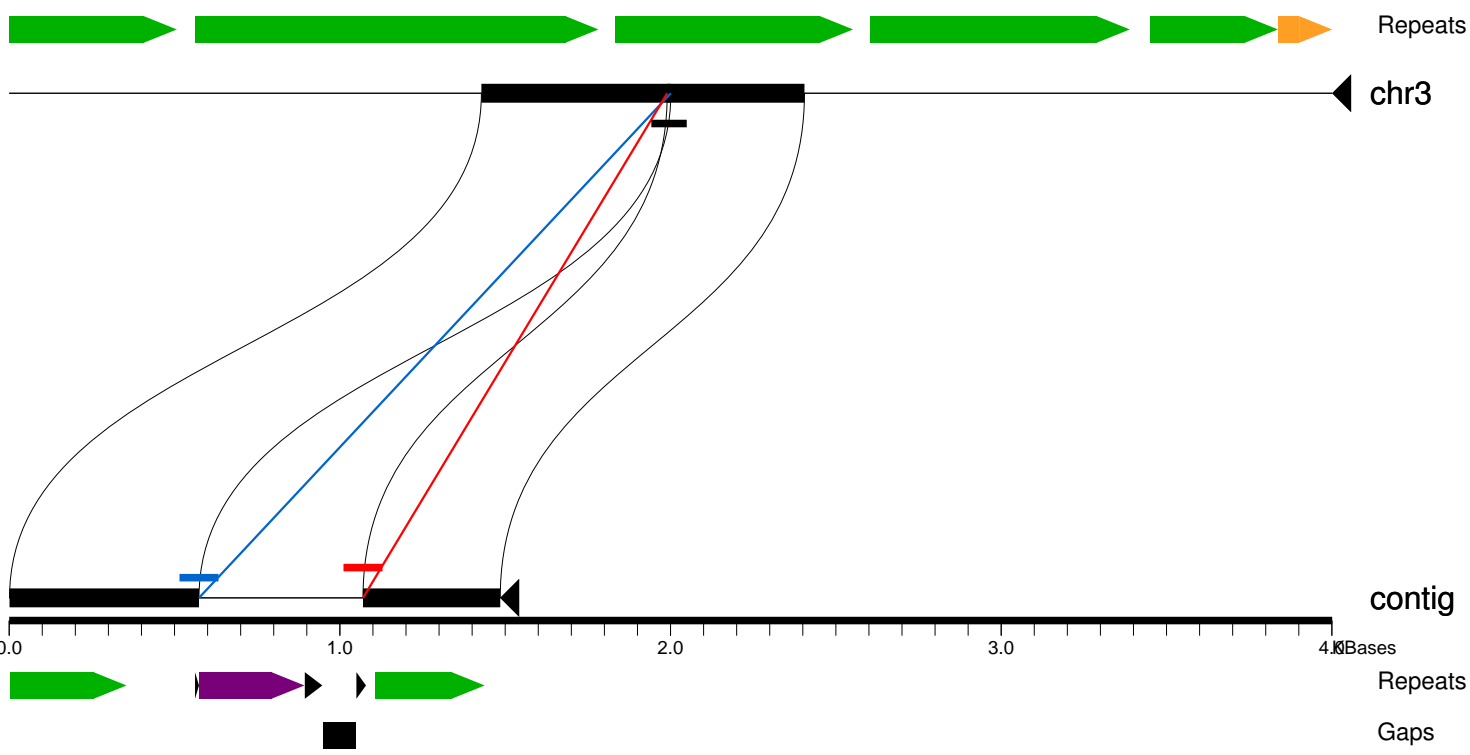

siteID: chr3\_11204171 Scaffitg2 - Breakpoint: chr3:11204166

chr3:11204006-11204340

Overlap Length: 15 INS size: 301 Genotyped: Yes

left -----AGCATTTTCCTCTCCTTGGTGGGGGAGTGCGGGCAAGGGGGTTGGGGCGATCCA  
chrom GATGA-ATGGGCAAGAAGCATTTTCCTCTCCTTGGTGGGGGAGTGCGGGCAAGGGGGTTGGGGCGATCCA  
right CAGGAGAATGGCGTGAA-----CCCGGGAGGCGGAGC-----TTGCAGTGAGCC-  
N2N2212NN222NN22\*111111111111\*\*11\*\*1\*\*1\*\*\*111111111111\*\*\*11\*1\*\*1\*\*1

left GAGGTCCCTAGCACCTGCTATTATCTGGACCAGCAGGGTATGGGAGAAATAGCCCCTGACCTTTCTGACC  
chrom GAGGTCCCTAGCACCTGCTATTATCTGGACCAGCAGGGTATGGGAGAAATAGCCCCTGACCTTTCTGACC  
right GAGATCGC--GCCACTGCACT-----CCAGCC-----TGGGCGACAGAGCGA--GAC---TCCGTCT  
\*\*\*1\*\*1\*11\*\*11\*\*\*11\*111111111\*\*\*\*\*111111111\*\*\*1\*\*1\*1\*\*\*1111\*\*\*111\*\*1\*1\*1

left CTCCTGTCCTGATGACTGATGAAAAGAAGTACTGTCTGGCCGGG-----CGCGGTGGCT-----  
chrom CTCCTGTCCTGATGACTGATGAAAAGAAGTACTGTCTGGCCGGG-----CGCGGTGGCT-----  
right CAAAAAAAAAAAAAAAAAAAAAAAAAAAAA- AACTACTGTCTGTGAGAAAAGCACTCCAGGGCTTTCCATTTGTG  
\*111111111111\*11\*111\*11\*\*\*1\*\*N\*\*\*\*\*2\*22\*2\*222222\*2\*222\*\*\*22222222222

left ----CACGCTGTAATCC-CAGCACTTTGGGAGGCCGAGGC--GGCGGATCACG-AGGTCAGGAGATCG  
chrom ATGTCAC-CCAGTCCTCAACAGCTCTACGAGATGCATATTCATGTGCCCATTTTATAGATGAGACAAGT  
right ATGTCAC-CCAGTCCTCAACAGCTCTACGAGATGCATATTCATGTGCCCATTTTATAGATGAGACAAGT  
2222\*\*\*2\*\*2\*\*22\*\*22\*\*\*\*2\*\*22\*2\*\*2\*\*22\*22\*22\*2\*\*22\*\*22222\*\*2\*2\*\*222\*22\*

left AGACCAT---CCTGGC-TAAC-----ACGGTGAAACCCGGT---CTCTACTAAA  
chrom AGGCTAGAGACATGGAGTAACTTATGCTAGAGTGTAACTGGGGAGACCAGTAACAAG  
right AGGCTAGAGACATGGAGTAACTTATGCTAGAGTGTAACTGGGGAGACCA-----  
\*\*2\*2\*2222\*2\*\*\*22\*\*\*\*2222222\*22\*\*\*2\*\*\*22\*\*22222\*2N11NN11N

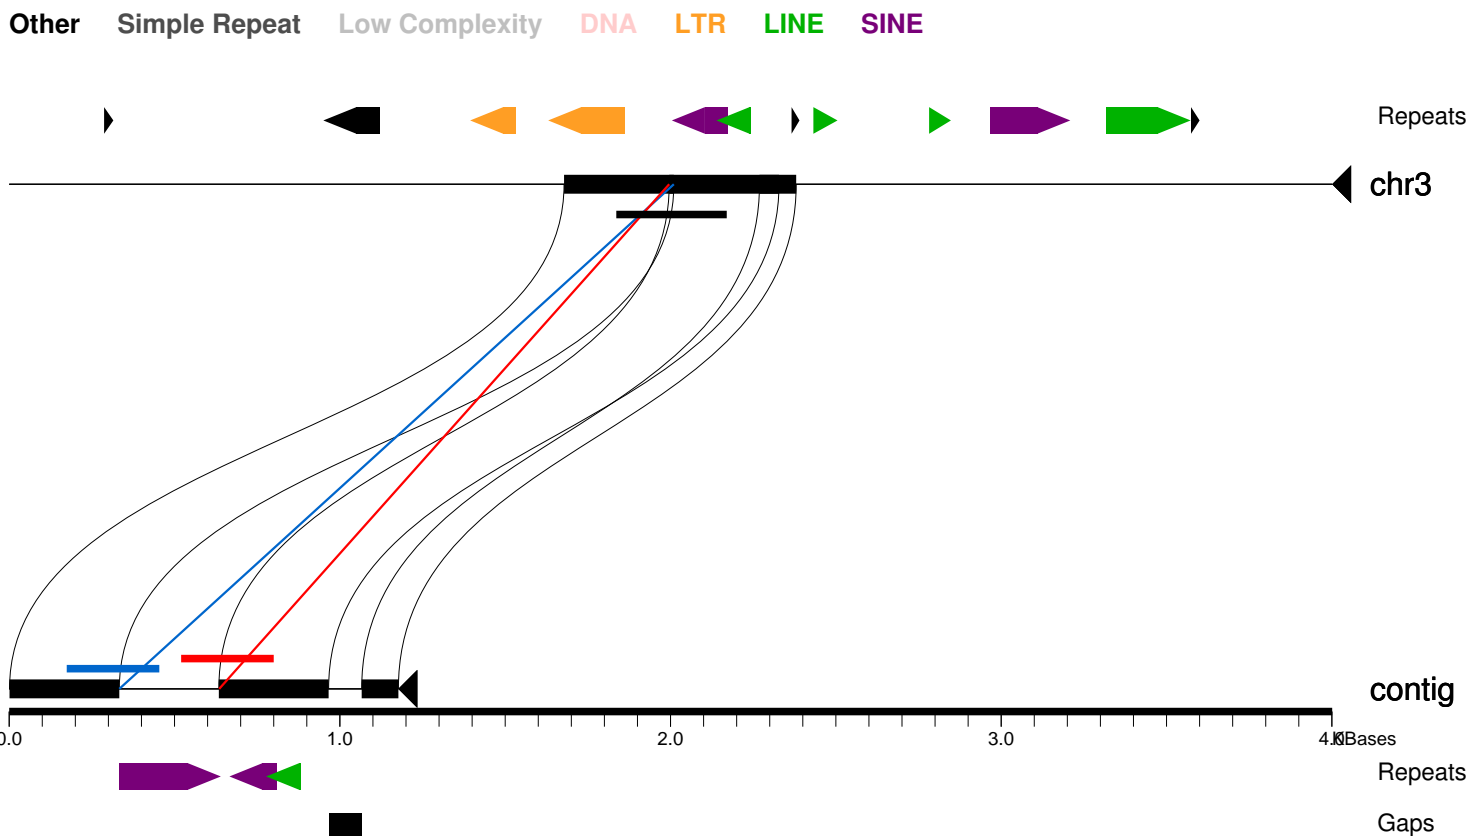

siteID: chr3\_112453490 Scafftig1 - Breakpoint: chr3:112453493

chr3:112453446-112453526

Overlap Length: 13 INS size: 285 Genotyped: Yes

left ACA-----CATTAATT-----AATATATC-----TGTCATAAAAGAT  
chrom ACA-----CATTAATT-----AATATATC-----TGTCATAAAAGAT  
right GCAGTGAGCCGAGATTGCGCCACTGCACTCCAGCCTGGGCGACAGAGCGAGACTCCGTCTCAAAAAAAAAA  
1\*\*11111\*1111\*\*\*1111111111\*1\*11\*1\*11111111111111111111\*1\*\*\*1\*\*\*1\*1

left AAAAATACTCACATTAAGATAATAAAGAGCCTGTAATCCCAGCACTTTGGGAGGCCGAGGCGGGCGGATC  
chrom AAAAATACTCACATTAAAGATAATAAAGACTATGTCCTCATA-----TTGC-----  
right AAAAAAAAAAAAAAAAAAAGATAATAAAGACTATGTCCTCATA-----TTGC-----  
\*\*\*\*\*1\*111\*1\*11\*\*\*\*\*222\*\*\*22\*\*22\*22222\*\*\*22222222222222222222222222222222

left ACGAGGTCAGGAGATCG  
chrom ---AGGT-----  
right ---AGGT-----  
222\*\*\*222222222222

Other Simple Repeat Low Complexity DNA LTR LINE SINE

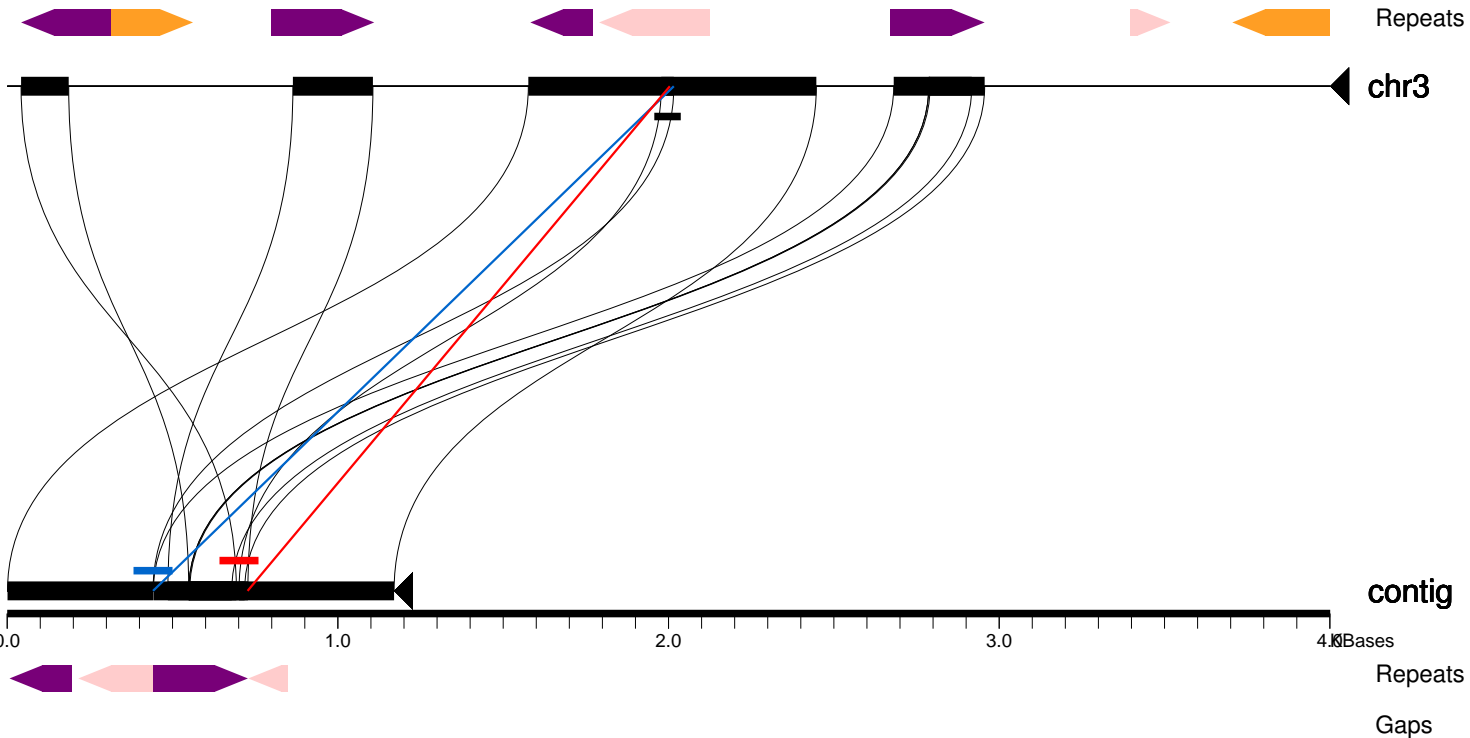

siteID: chr3\_112573663 Scaffitig1 - Breakpoint: chr3:112573658

chr3:112573617-112573717

Overlap Length: 14 INS size: 293 Genotyped: Yes

```
left  AAGG---TATTTCAATCAA-----CA-AGCAAAAAACAAAC----AACCTCATTA AAAAAGTGGGC
chrom AAGG---TATTTCAATCAA-----CA-AGCAAAAAACAAAC----AACCTCATTA AAAAAGTGGGC
right ATCGCGCCACTGCACTCCAGCCTGGGCGACAGAGCCAGACGCTGTCTCAAAAAAAAAAAAAA AAAAAGTGGGC
      *11*1111*1*1**1**1*1111111111**1***1*1*11*111*1111**1111*11*****
```

```
left  AGACGGCCGGGCGTGGTGGCTCACGCCTGTAATCCCAGCACTTTGGGAGGCCGAGGCGGGTGGATCA
chrom AGAGGACCTGAACAGAGAG---AAGGC---ATACATGCA-----GCCAA--CAAGCATTTGA
right AGAGGACCTGAACAGAGAG---AAGGC---ATACATGCA-----GCCAA--CAAGCATTTGA
      **2*2**2*2222*222*222*2*2*2222**2*22***222222222**2*22*22*2222*2*
```

Other Simple Repeat Low Complexity DNA LTR LINE SINE

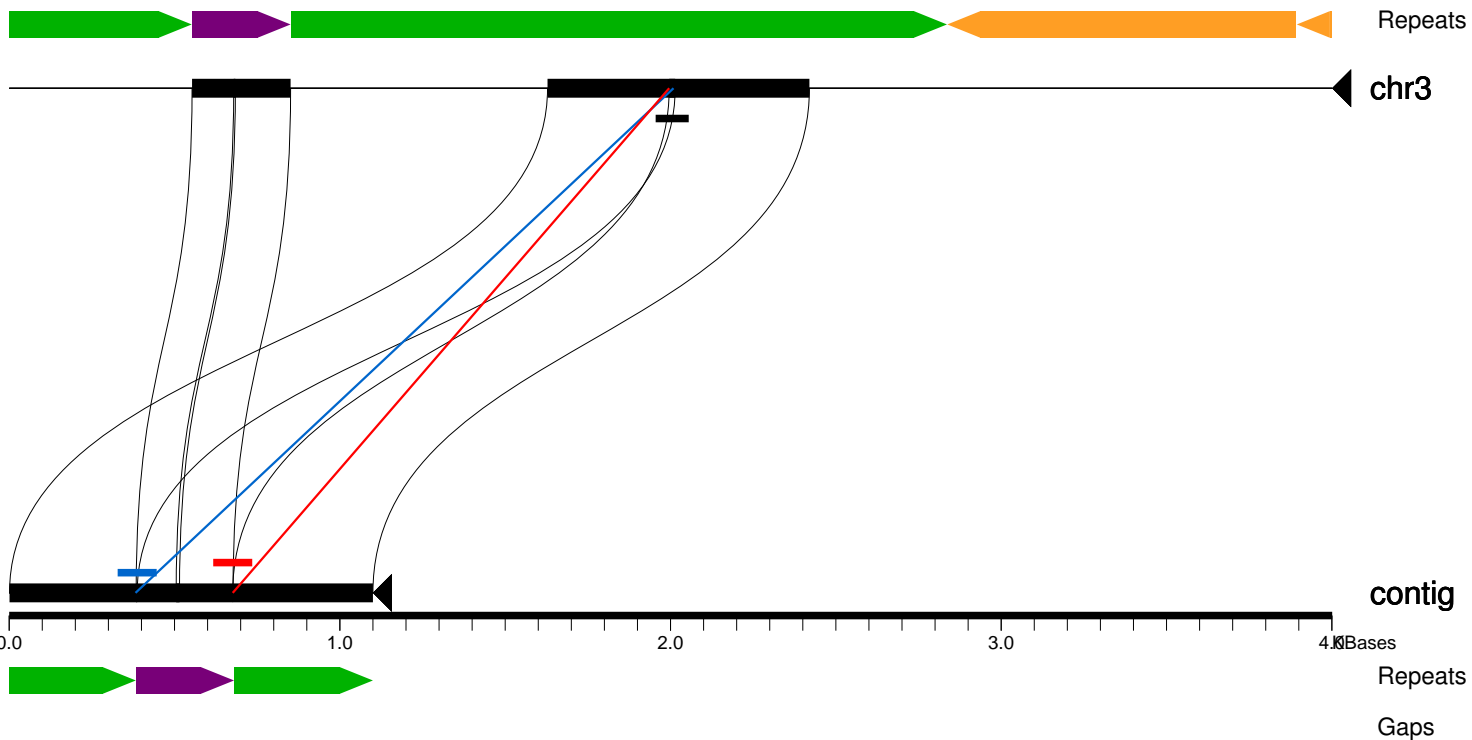



siteID: chr3\_113047164 Scaffoldig3 - Breakpoint: chr3:113047145

chr3:113047097-113047204

Overlap Length: 12 INS size: 460 Genotyped: No

```
left  AATAT-----TTTAAATAGATAAAAATAATCATG---GAGCCACAAAAAACCTGTTCAATCTCT
chrom AATAT-----TTTAAATAGATAAAAATAATCATG---GAGCCACAAAAAACCTGTTCAATCTCT
right TCCACCCGCCTCGGCCTCCCAAAGTGCTGGGATTA-CAGGCGTGAGCTACCGCG--CCCGGC CAATCTCT
      111*111111111111111*111***11*1*111**1*1**1*111****1**111111**1*11*****
```

```
left  TTC TTTTTTTNNNNNNNNNNNNNNNNNNNNNNNNNNNNNNNNNNNNNNNNNNNNNNNNNNNNNNNNNN
chrom TTC TAAGATT-----GAAGAAATTAAGGTCAAAGTTACTTTTCCTGATAAGAGCCGA
right TTC TAAGATT-----GAAGAAATTAAGGTCAAAGTTACTTTTCCTGATAAGAGCCGA
      ***2222**222222222222222222222222222222222222222222222222222222222
```

Other Simple Repeat Low Complexity DNA LTR LINE SINE

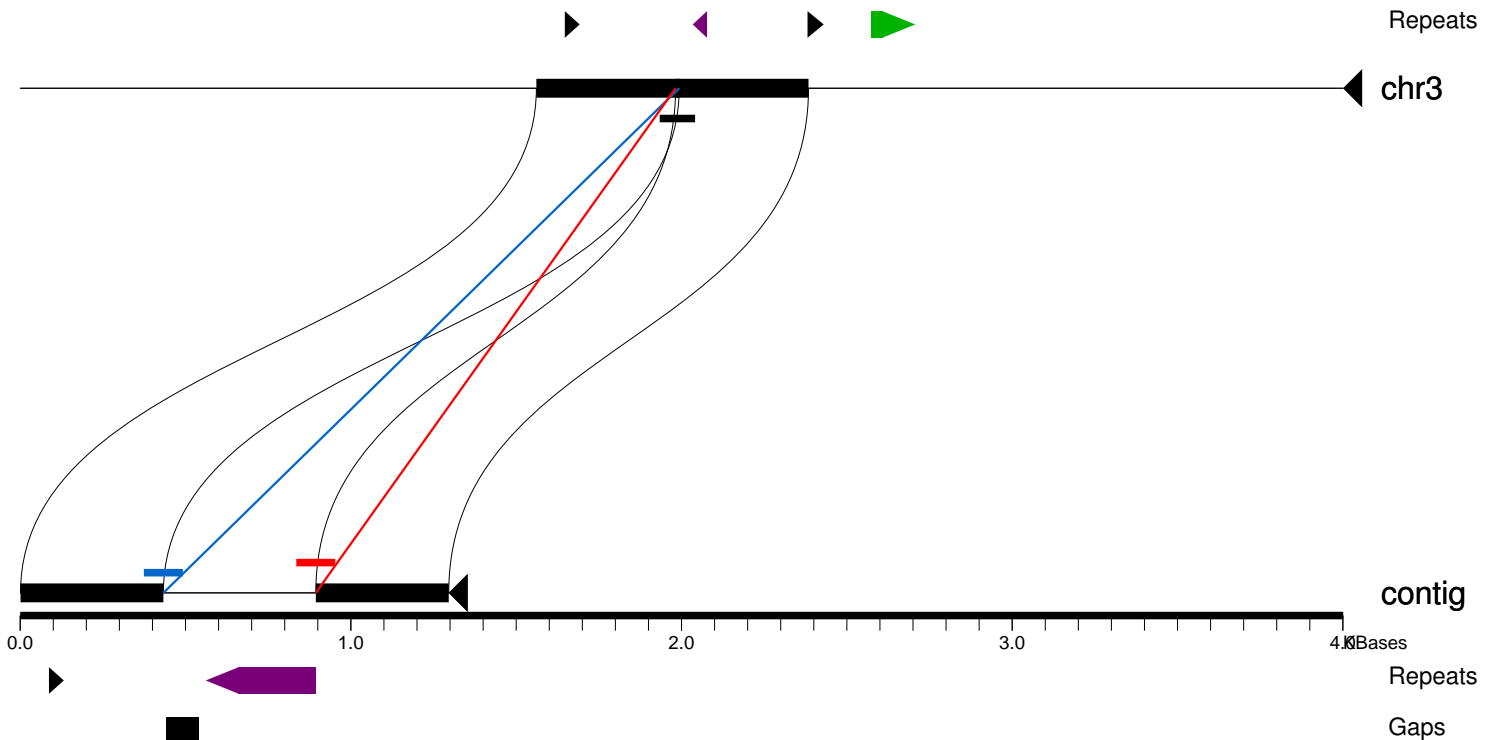

siteID: chr3\_114364954 Scafftig1 - Breakpoint: chr3:114364935

chr3:114364879-114364984

Overlap Length: 4 INS size: 311 Genotyped: Yes

```
left  GAAGAGTCAACTTTTTGGCCTTAGTCATTTACTGAGTTCCTTTATT-----AAAAATAGAG
chrom GAAGAGTCAACTTTTTGGCCTTAGTCATTTACTGAGTTCCTTTATT-----AAAAATAGAG
right CTGCACTCCAGCCTG-GGCGACAGAGCGAGACTCCGTCTCAAAAAAAAAAAAAAAAAAAAAAAAAAAAA
      1111*1**1*111*11***111**111111***11**11*111*1111111111111111*****1*1*1
```

```
left  CATAAGGCCGGGCGCGGTGGCTCACGCCTGTAATCCCAGCACTTTGGGAGGCCGAGGCGGGCGG
chrom CATAAACAT-----TTTAGAAATAATTTTTTCTCAATCTTTTTTTA---TAAAAC---CTC
right CATAAACAT-----TTTAGAAATAATTTTTTCTCAATCTTTTTTTA---TAAAAC---CTC
      ***22*222222222*22222*2222*2*22**2**2222***222*22222*22*222*22
```

Other Simple Repeat Low Complexity DNA LTR LINE SINE

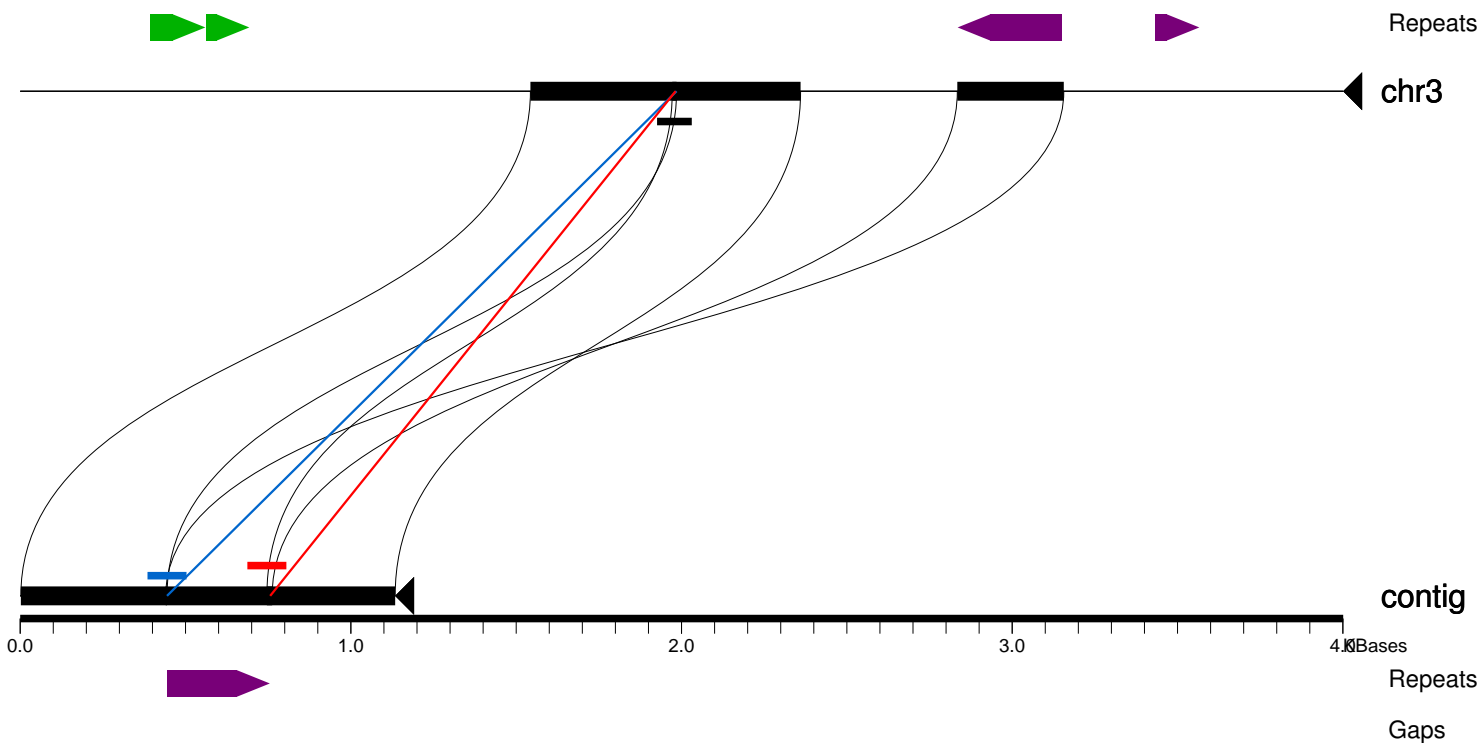



siteID: chr3\_115383099 Scaffoldig1 + Breakpoint: chr3:115383078

chr3:115383032-115383137

Overlap Length: 14 INS size: 431 Genotyped: No

```
left   TTA---GAATTTGCTATTATTATGTTCTCCAAGCATA----TGAG-----GGTATTTTATGTCATTAC
chrom  TTA---GAATTTGCTATTATTATGTTCTCCAAGCATA----TGAG-----GGTATTTTATGTCATTAC
right  CCACCCGCTCGGCC-TCCCAAAGTGCTGGGATTACAGGCGTGAGCCACCGCGCCCGGCCATGTCATTAC
      11*111*11*11**11*1111*1**1**111*11*1*1111****1111111*1111111******

left   TTTT-----TTTTTTTTTTTTTTTTTTTTTTTTTTTTTTTTTTTTTTTTTTTTTTTTTTTTTTTTTTT
chrom  TTTT-----TTTTTTTTTTTTTTTTTTTTTTTTTTTTTTTTTTTTTTTTTTTTTTTTTTTTTTTTTTT
right  TTTT-----TTTTTTTTTTTTTTTTTTTTTTTTTTTTTTTTTTTTTTTTTTTTTTTTTTTTTTTTTTT
      ***2222222222222222222222222222222222222222222222222222222222222222222222
```

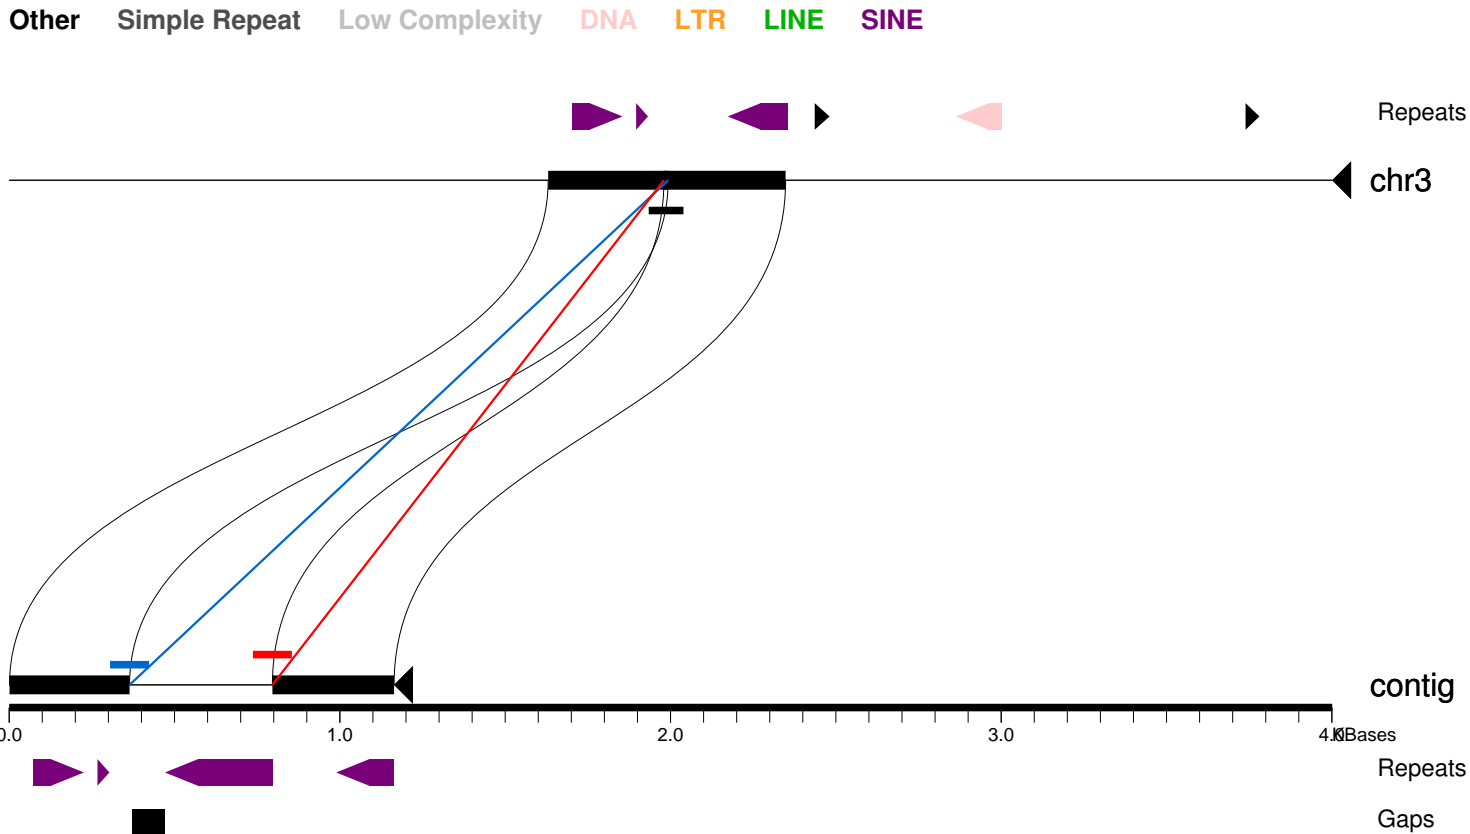

siteID: chr3\_115604503 Scafftig1 + Breakpoint: chr3:115604454

chr3:115604294-115604628

Overlap Length: 15 INS size: 153 Genotyped: Yes

```
left -----TAGAAGACTAGTGGGGAAGCTAGGTTATATTTGACCAACAAAATATGAGGACAGAC
chrom GTTCTGAAGAAAACTAGAAGACTAGTGGGGAAGCTAGGTTATATTTGACCAACAAAATATGAGGACAGAC
right -----AGAATGGCGTGAACCCGGGAGGCGAGCTTGC-----AGTGAGCCG-----AGATCCCGCCA--C
                2222NNN211***11*11*1**1*1***1*11111*1***1*111111*1**111*1**11*
```

```
left TGAAAGAGGTAAGTTTAAATATCAGCTAAAGTCTTGGGCAGCTGGTCAGAATCCAGACTGGATTCATGCTG
chrom TGAAAGAGGTAAGTTTAAATATCAGCTAAAGTCTTGGGCAGCTGGTCAGAATCCAGACTGGATTCATGCTG
right TGCAC-----TCCAGCCTGGGCGACAGAGCGAGACTCCGTCTCAAAAAAAAAAAAAAAAA-----
                **1*1111111111*11*111*11**1*1**11111*1*11*111***1**111*1*1111*1111111111
```

```
left TCATCAGCAGAGGTCAATTTGAAAGGTAAACAACTGTCCAGCTACTTGGGAGGCTGAGGC-AGGAGAAT
chrom TCATCAGCAGAGGTCAATGTGAAAGGTAAACAACTTTTGTGTGTGTGGGGGTGGGTGGGGGGACAAGTAT
right --AAAAAAAAAAAAAAAAGAAAGGTAAACAACTTTTGTGTGTGTGGGGGTGGGTGGGGGGACAAGTAT
                11*11*11*1*1111**1N1******2*222222*2222***2**2**2**22*22*12**
```

```
left G----GCGTGAACCCGGG-AGGCGGAGCTT-----GCAGTGAGCCGAG-----ATCCCGC
chrom CTGCTGCATAAAGCAAGATAGATGCTTCTTATCAATCAAGAAGCATTTAGATGCTTCTTATCAATCGGAA
right CTGCTGCATAAAGCAAGATAGATGCTTCTTATCAATC-----GGAA
                22222**2*2**2*22*22**22*222***2222222                111N1N11NN1NN                1112222
```

```
left CACTGCACTCCAGCCTG----GGCGACAG---AGCGAGACTCCGT-CTCA-----
chrom TACTGGAAACAACCTTAGAAAATGGCAAGGCTTAAAGTTAGAGTCAATACTCATGCAG-----
right TACTGGAAACAACCTTAGAAAATGGCAAGGCTTAAAGTTAGAGTCAATACTCATGCAGGCTAATGCTAC
                2***2*22*2*2222*2222***2*222222**22***2**22*2***222211111111111
```

Other Simple Repeat Low Complexity DNA LTR LINE SINE

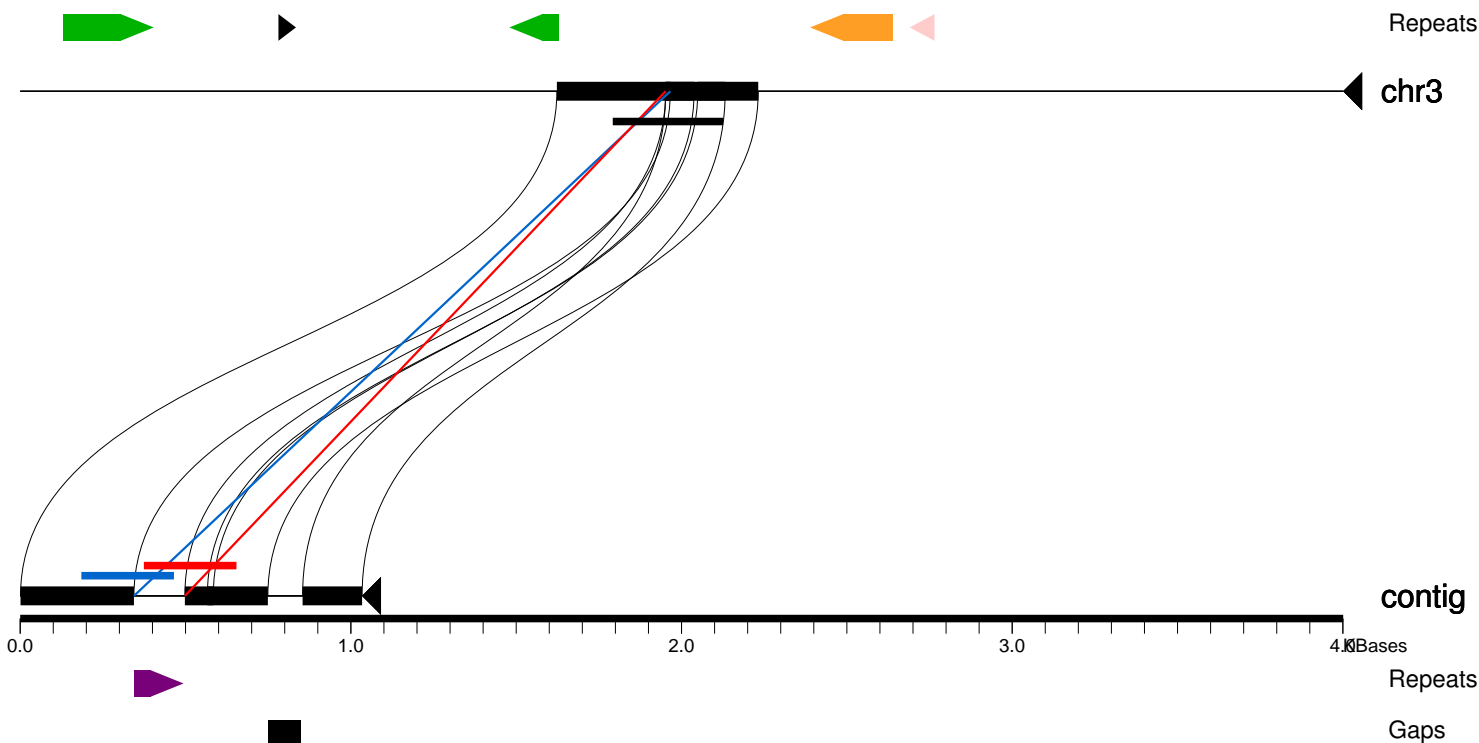

siteID: chr3\_120318963 Scafftig1 + Breakpoint: chr3:120318953

chr3:120318924-120319017

Overlap Length: 31 INS size: 281 Genotyped: Yes

```
left -----ATTAAAAGGAACGGGAGCATTT-CCATCAT-----AAGGTTTTTTTTTTTT
chrom -----ATTAAAAGGAACGGAAGCATTT-CCATCAT-----AAGGTTTTTTTTTTTT
right CCGCCTCGGCCTCCCAAAGTGCTGGGATTACAGGCGTGAGCCACCGCGCCCGGCCAAGGTTTTTTTTTTTT
      111111111111111111111111*1*1111***111121**1*111***1*111111111111*****
```

```
left TTTTTTTTTTTTTTTTTTTGAGACGGAGTCTCGCTCTGTCGCCAGGCTGGAGTGCAGTGGCGGGATCTCGGC
chrom GTTTTTTTTTTTTTTTTTTTAA-AC-----TTCTGA-----GCTGCAGCTGATT-----ATCTCAGG
right -TTTTTTTTTTTTTTTTTTTAA-AC-----TTCTGA-----GCTGCAGCTGATT-----ATCTCAGG
      N*****2*2**2222222222*****22222222*****2**222*2*222222*****2*2
```

```
left TCACT
chrom GTA--
right GTA--
      22*22
```

Other Simple Repeat Low Complexity DNA LTR LINE SINE

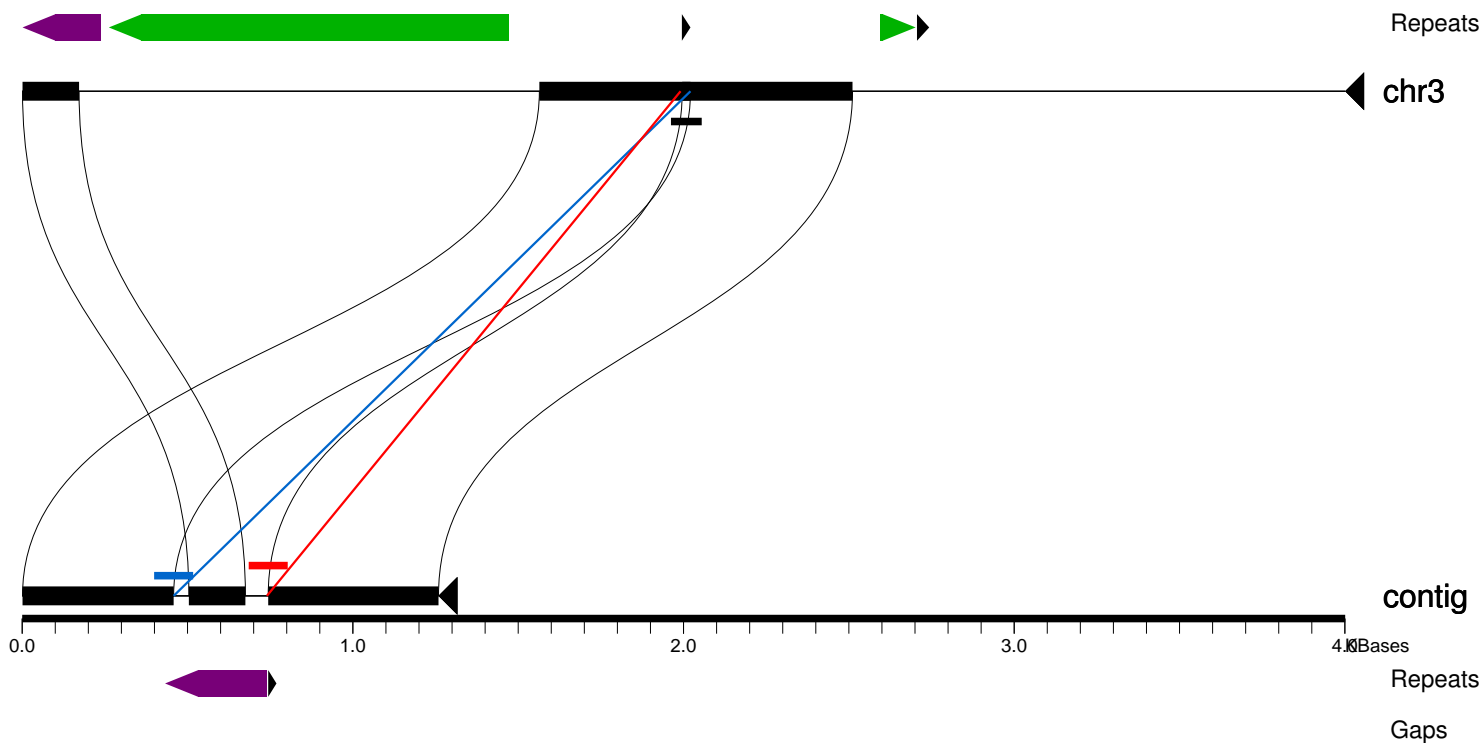

siteID: chr3\_120425479 Scafftig2 + Breakpoint: chr3:120425461

chr3:120425416-120425520

Overlap Length: 15 INS size: 283 Genotyped: Yes

```
left  TAA-----TATTA----GGTAATGAAAATCTACTAAAATAGTACTGATTTGATA-----CAATTGCTA
chrom TAA-----TATTA----GGTAATGAAAATCTACTAAAATAGTACTGATTTGATA-----CAATTGCTA
right AGACGGGGTTTCACCTTGTAGCCAGGATGGTCTCGATC--TCCTGACCTCATGATCCACC*CAATTGCTA
      11*111111*1*1*11111*1**111*11**111**11*1111*1*****11*1**11111111******

left  TTCTTTTTTTTTTTTTTTTTTTTTTTTTTTTTTTTTTTTTTTTTTTTTTTTTTTTTTTTTGAGACGGAGT
chrom TTCTTTAGCTGACAAAATAGTGTCTCTGTAGATCATCTGAGACTAATCTATT-----
right TTCTTTAGCTGACAAAATAGTGTCTCTGTAGATCATCTGAGACTAATCTATT-----
      *****222*2222222*22*2*22*2*222*22*2*22222*22*2*2**2222222222222
```

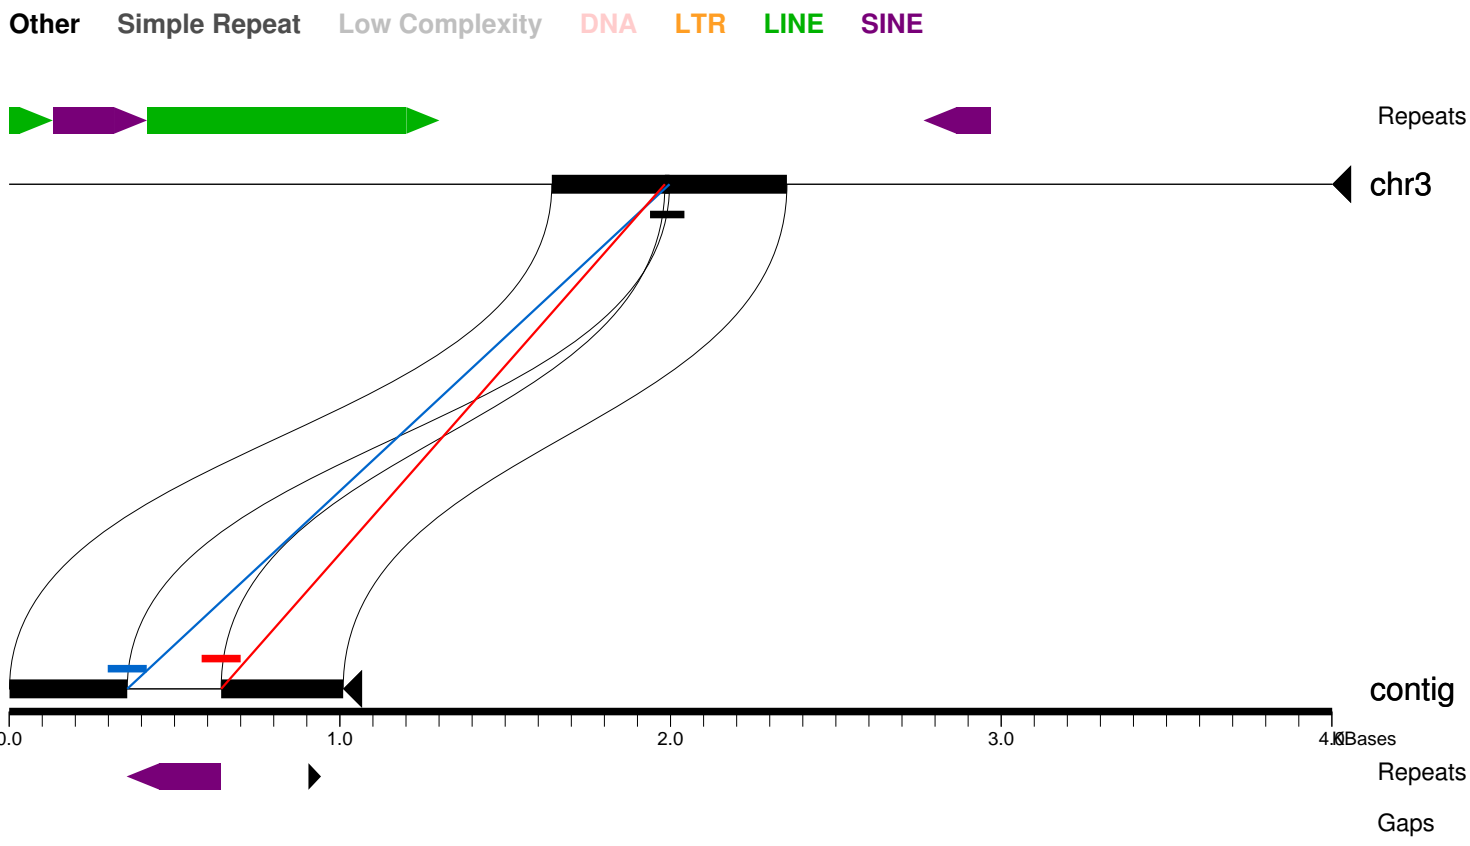





siteID: chr3\_12818456 Scafftig2 - Breakpoint: chr3:12818453

chr3:12818409-12818512

Overlap Length: 16 INS size: 323 Genotyped: Yes

```
left      G--CCTGTCTCTGTTTCTCAA--TTC----ATTCCA--CATTGTGAAAGG-----GAAAGGGGCTATTGT
chrom     G--CCTGTCTCTGTTTCTCAA--TTC----ATTCCA--CATTGTGAAAGG-----GAAACGGGCTGTTGT
right    CCACCTGCCTCGGCCTCCCAAAGTGGCTGGGATTACAGGCGTGAGGCACCCGCGCCCGGTGGGGCTGTTGT
          111***1**1*11**1***11*1*1111***1**11*1*111*1*11*11111*111*G*****2****

left      TTATTATTATTATTATTATTATTTTTTTTTATTGAGACGGAGTCTCGCTCTGTCGCC
chrom     TTATTAACACCCTAA---ATAGAAATCACCAAATAGTATGAAGAA-----TTTGACA
right    TTATTAACACCCTAA---ATAGAAATCACCAAATAGTATGAAGAA-----TTTGACA
          ***C*2*22222*2*222**22*22*2222*22*22*2*22***22222222222222*2*22*2
```

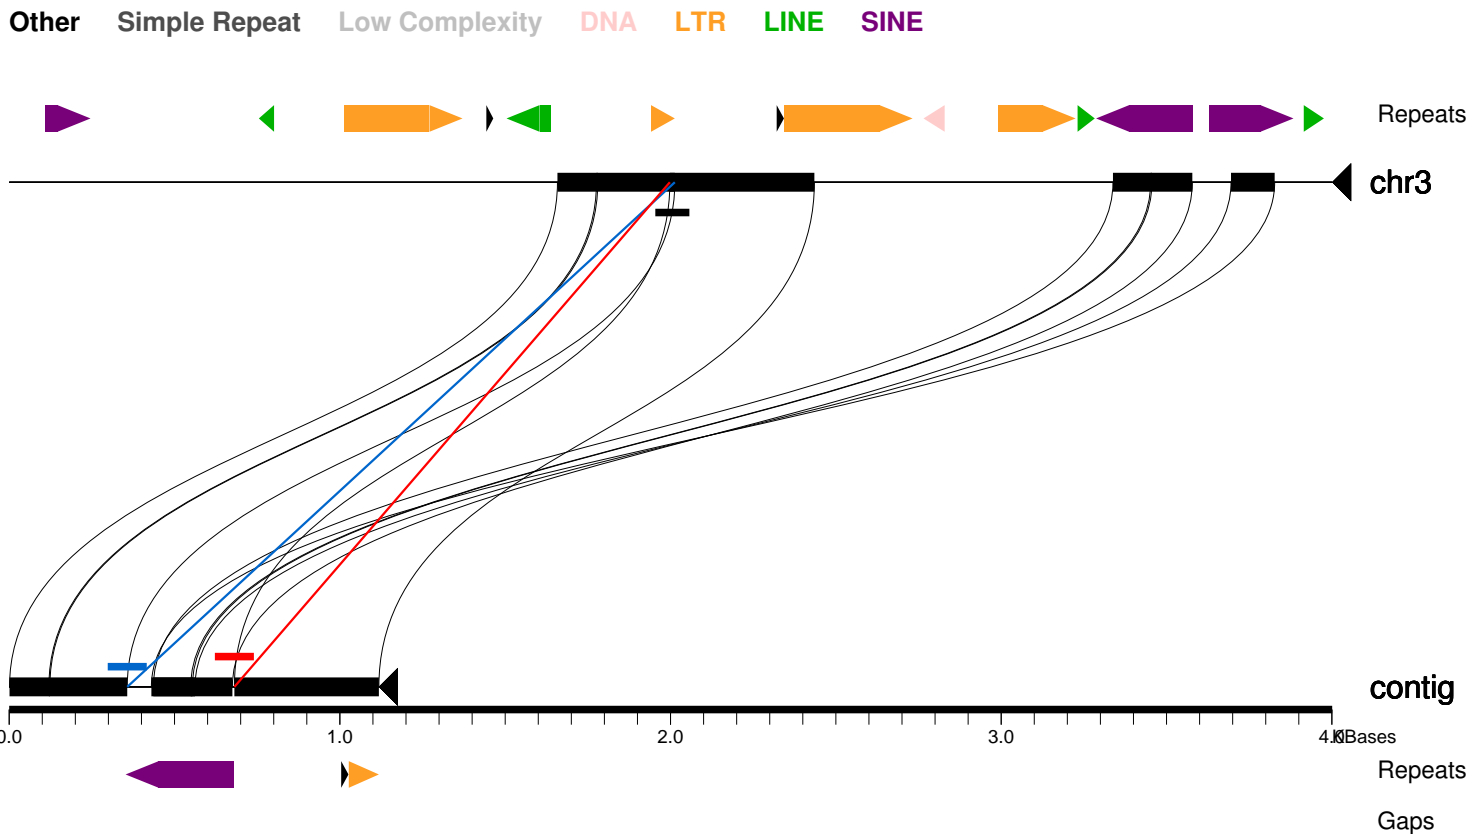

siteID: chr3\_129938410 Scafftig9 - Breakpoint: chr3:129938414

chr3:129938375-129938473

Overlap Length: 18 INS size: 302 Genotyped: Yes

```
left  ATATGAGATAGGATAAGCTACAG---GAT---GT-----AACAAATGCTGCAAATAAAGAAT
chrom ATATGAGATAGGATAAGCTACAG---GAT---GT-----AACAAATGCTGCAATAAAGAAT
right CTGCACTCCAGCCTGGGCGACAGCGAGACTCCGTCTCAAAAAAAAAAAAAAAAAAAAAAAAAA
1*11111111*11*11*11*1***1111*1111*1111111111111111*1**1111111***1***1***
```

  

```
left  CAATGGGGGGCCGGGCGTGGTGGCTCACGCCCTGTAATCCCAGCACTTTGGGAGGCCGAGGCGGGCGGATC
chrom GAATGGGAGCACAGTGACTTGGAG-----AGGAAAC-----GAAAATAGATTC---CCTTTT
right GAATGGGAGCACAGTGACTTGGAG-----AGGAAAC-----GAAAATAGATTC---CCTTTT
2*****2**222*2*222***222222222*2**2*2222222222*2*2222**22*222*222*2
```

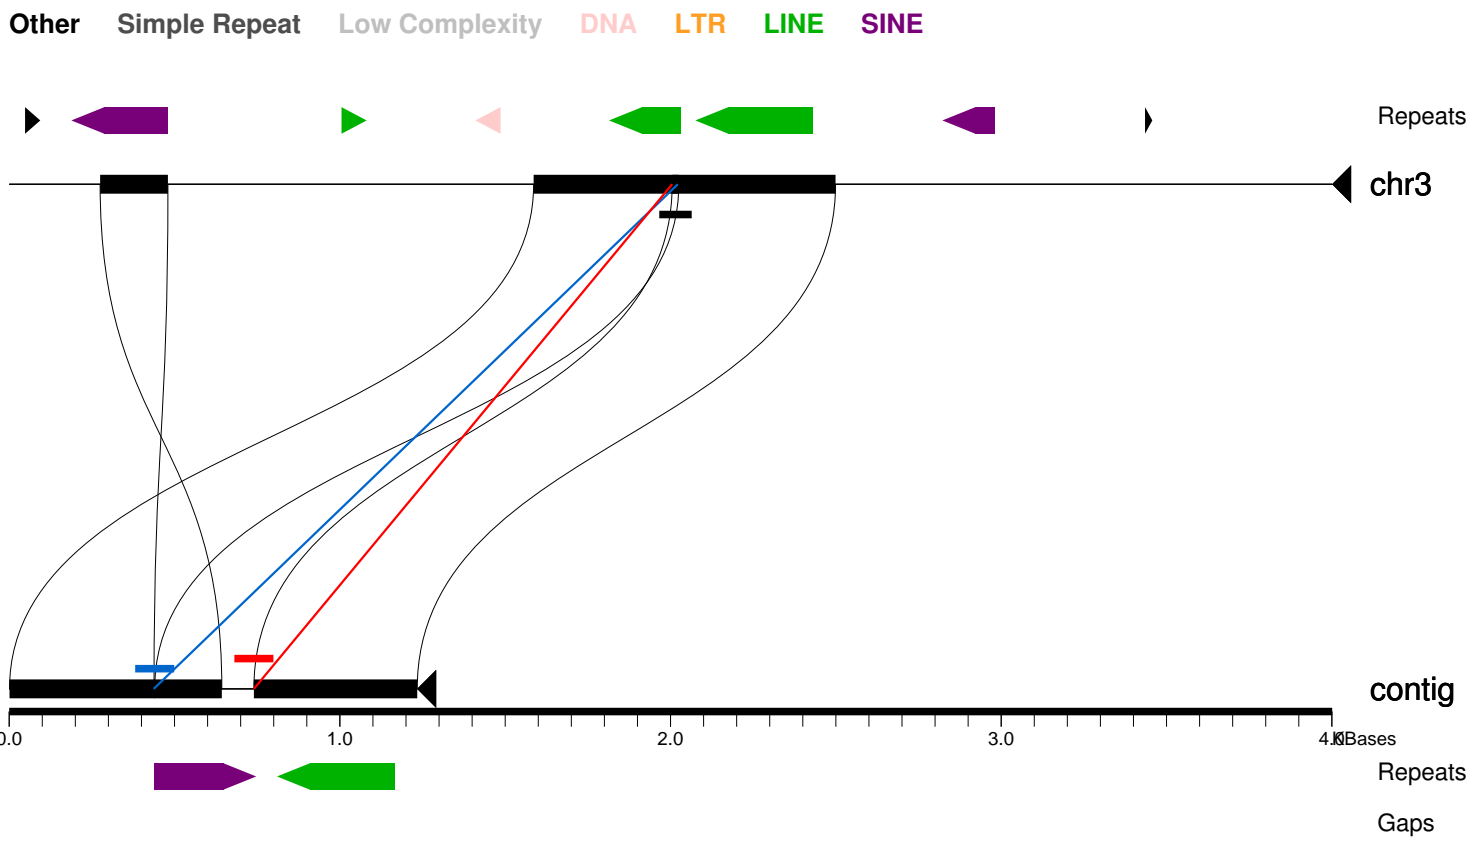

siteID: chr3\_132577741 Scafftig1 - Breakpoint: chr3:132577724

chr3:132577564-132577897

Overlap Length: 14 INS size: 416 Genotyped: No

left -----CATAAATATGTACTTACCTAAGTCCTGT  
chrom TT-ACTGTTGCTTGTGTAAG-CCAAGACAACCTTGGATGTTATCATAAATATGTACTTACCTAAGTCCTGT  
right TTTAGTAGAGACGGGGTTTCACCGTGTTAGCCAGGATGGTCTCG-----ATCTCTGACCTC-----GT  
2212N2NNN2NNN2N22NNN122NN2NN2N22NN2222N2N2\*111111\*\*1\*1\*\*1\*\*\*1111111\*\*

left CTTTTGGCAAATTTATGGGCTATGAGGCACATAGCGTTCTTGCCTTTCCCTGAGGGGTTAATTTTCAGTGAT  
chrom CTTTTGGCAAATTTATGGGCTATGAGGCACATAGCGTTCTTGCCTTTCCCTGAGGGGTTAATTTTCAGTGAT  
right GATCCGCC-----GCCTCGGCCTCCCAAAGTGCT-----GGGATTACAGGC-GTGAG  
11\*11\*1\*11111111\*1\*\*11\*111\*1\*\*1\*\*1\*1\*1111111111111111\*\*\*1\*\*\*1111\*1\*\*\*1

left CCTACACATTTACTTCTGAAGCACATATGCTCTTCTTNNNNNNNNNNNN-----  
chrom CCTACACATTTACTTCTGAAGCACATATGCTCTTCTTATATGGCATGTAAGCCCTGGGTCTAGGGGGTAAC  
right CC-----ACCGCGCCCGCCATATGCTCTTCTTATATGGCATGTAAGCCCTGGGTCTAGGGGGTAAC  
\*\*11111111\*\*11\*1111\*11\*\*\*\*\*1\*2222222222222222222222222222222222222222222222

left -----  
chrom AGTGCAAAGATCTACCTGTCGTGCTGCTACATGCTTCTAAATTTGCTAATAAATCACCTTCCACTGACCA  
right AGTGCAAAGATCTACCTGTCGTGCTGCTACATGCTTCTAAATTTGCTAATAAATCACCTTCCACTGACCA  
222222222222222222222222222222222222222222222222222222222222222222222222

left -----  
chrom AAAAAACACATTTTTTCTCTCTAATCAGTATGACAATGATGGTGAGTAAAGATATAG  
right AAAAAACACATTTTTTCTCTCTAATCAGTATGATAATGATGGTG-----  
222222222222222222222222222222222222222222N2222222222

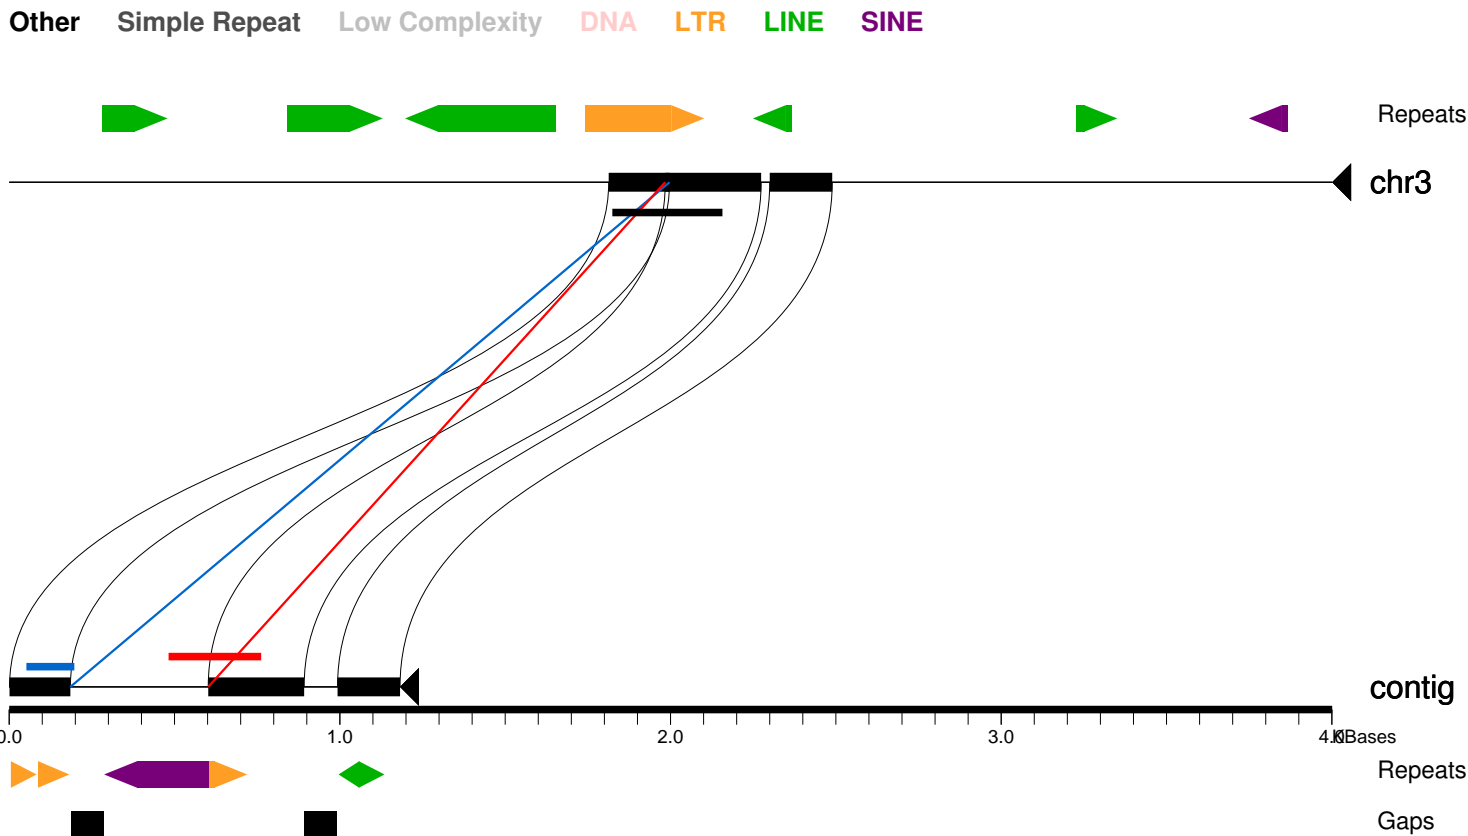

siteID: chr3\_135080998 Scafftig1 - Breakpoint: chr3:135080991

chr3:135080831-135081160

Overlap Length: 10 INS size: 345 Genotyped: No

```

left      -----TCCTTTTCAGAGATCGTGGTGTGTAAAAAGTCTGCC
chrom
right    AGGACCAGGAAC TACAATGTTTTCTACCCAATGGTTCCTTTTCAGAGATCATGGTGTGTAAAAAGTCTGCC
NNN2NN22NN22NN  2N2222N          1**1*1*1**11*112****1*11*11111111**

left     AATGCATCTGCACCTCTCTGGGTCA TATGATGCTTTGGGGTATGAGGACTTATTATGACAATGCAACTTCC
chrom
right   AATGCATCTGCACCTCTCTGGGTCA TATGATGCTTTGGGGTATGAGGACTTATTATGACAATGCAACTTCC
TCGTGATCCGCCCGCCTCGGCCTCCCAAAGTGCTGGGATTAC-AGGCCTGA-----GCCACCGCG
11111***1**1*11***1*11**111*1*111*1**11**11***11*1*1111111111**1**11*1

left     CCATGGGACAAGAAGGATAATGAATGGTCANNNNNNNNNNN-----
chrom
right   CCATGGGACAAGAAGGATAATGAATGGTCATTTTTGAGTGTTTACCCTGAAACAAATTTTGACAGGTAG
CCC--GGCC-----TGAATGGTCATTTTTGAGTGTTTACCCTGAAACAAATTTTGACAGGTAG
**111**1*1111111111111*****22222222222222222222222222222222222222222222

left     -----
chrom
right   AGTTTTGTTGACTTGGAGAACAGACCTTTTCAGCCCTAGGATGGAGACCTAAAAGGTATGTGGGCTCCCCAA
2222222222222222222222222222222222222222222222222222222222222222222222

left     -----
chrom
right   AGGCACAGGAAGAGTATAGCTGAAAAAGGGCACTAAGGTAGTGTAGGCTGA
AGGCACAGGAAGAGTATAGCTGAAAAAGGGCACTAAGGTAG-----
222222222222222222222222222222222222222222222222222222222222222222
    
```

Other Simple Repeat Low Complexity DNA LTR LINE SINE

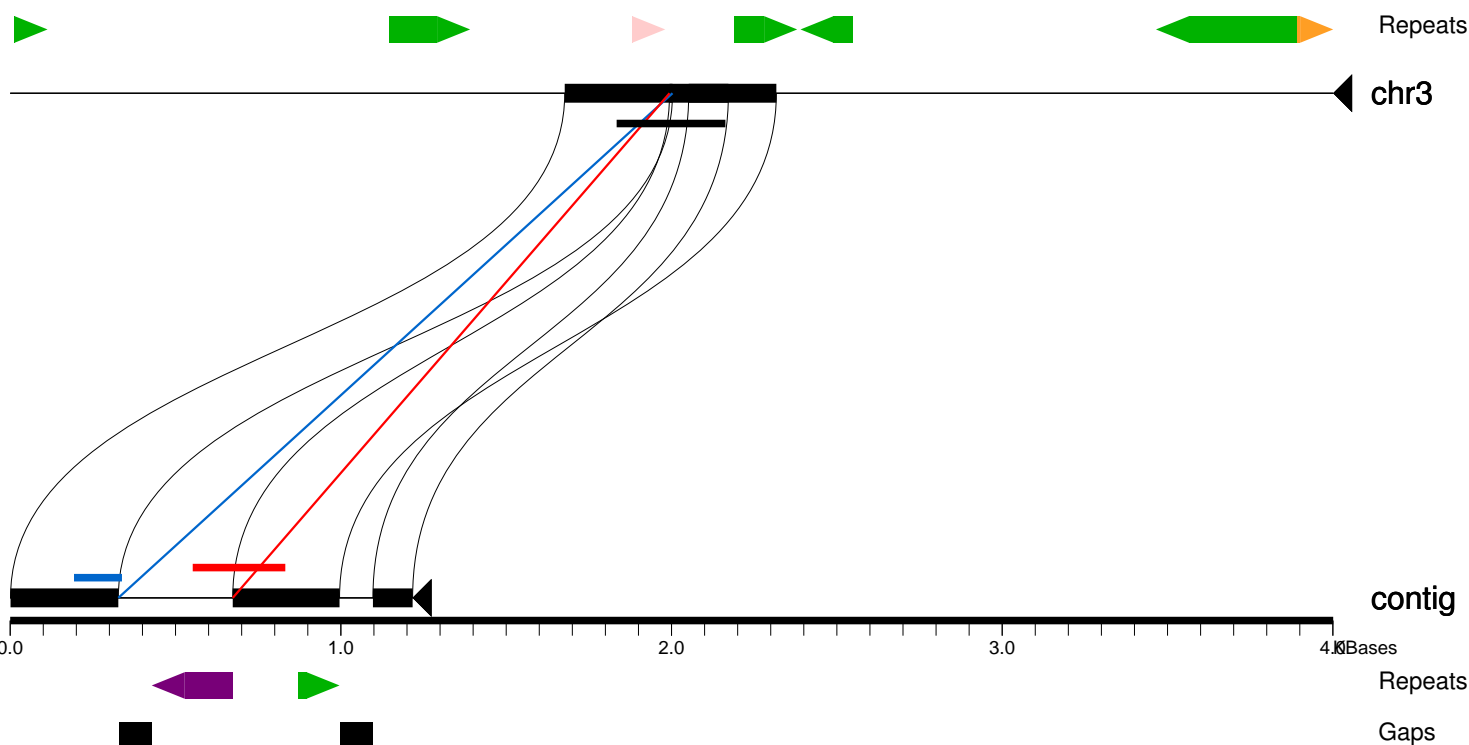

siteID: chr3\_140524436 Scafftig3 - Breakpoint: chr3:140524424

chr3:140524377-140524483

Overlap Length: 13 INS size: 308 Genotyped: Yes

```
left      T-----TTAATTCTGTTTATGTGGTGT-ATTCCAT---TFACTGATTTTCGTATGT--TGAACCATTTC
chrom     T-----TTAATTCTGTTTATGTGGTGT-ATTCCAT---TFACTGATTTTCGTATGT--TGAACCATTTC
right     CCGCCCGCCTCGGCCTCCCAAAGTGCTGGGATTACAGGCGTGAGCCACCGCGCCCGGCC TGAACCATTTC
          1111111111*1111**1111*1***1**11***1**1111*1*111*111**111*111*****

left      TTTTTTTTTTTTTTTTTTTTTTTTTTTTTTTTTTGGAGACGGAGTCTCGCTCTGTCGCCCAGGCTGG
chrom     TTAATACCTGATAGGAAACCCACTTGATCATAGTTGATTATC---CTTT-----TGA
right     TTAATACCTGATAGGAAACCCACTTGATCATAGTTGATTATC---CTTT-----TGA
          **22*222*22*2222222222**22*2222222**2*2**222**2*22222222**2
```

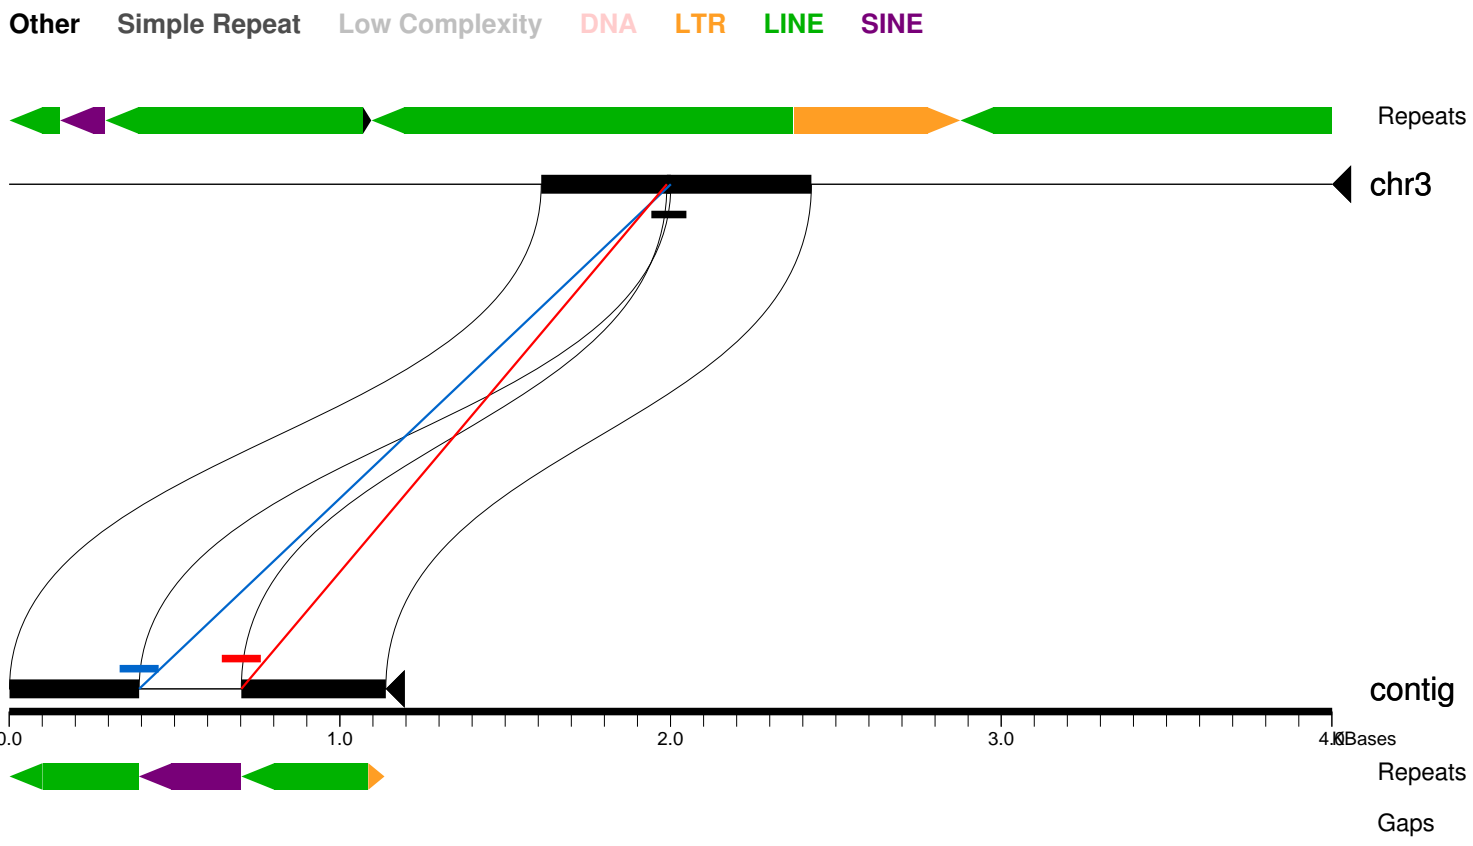

siteID: chr3\_141310662 Scafftig1 + Breakpoint: chr3:141310635

chr3:141310585-141310694

Overlap Length: 10 INS size: 407 Genotyped: No

```
left  ATAGCCAGCC-----CTACCCTAGCTCA-----TATAGCCAGTGGACATTGTAAAAGAAATGTCCATGAT
chrom ATAGCCAGCC-----CTACCCTAGCTCA-----TATAGCCAGTGGACATTGTAAAAGAAA*GTCCATGAT
right CC-GCCCGCCTCGGCCTCCCAAAGTGCTGGGATTACAGGCGTGAGCCACCGCGCCCGGCC*GTCCATGAT
      111***1***11111**1**11**11*111111**1**1*1111*1**11*11111*111******
```

```
left  NNNNNNNNNNNNNNNNNNNNNNNNNNNNNNNNNNNNNNNNNNNNNNNNNNNNNNNNNNNNNNNNNNNNNNNNN
chrom ATTTTAAACATAAAATGTTCAATACACTGAAGTTGACACGGTTTTTCACCTA-----
right ATTTTAAACATAAAATGTTCAATACACTGAAGTTGACACGGTTTTTCACCTA-----
      2222222222222222222222222222222222222222222222222222222222222222222222
```

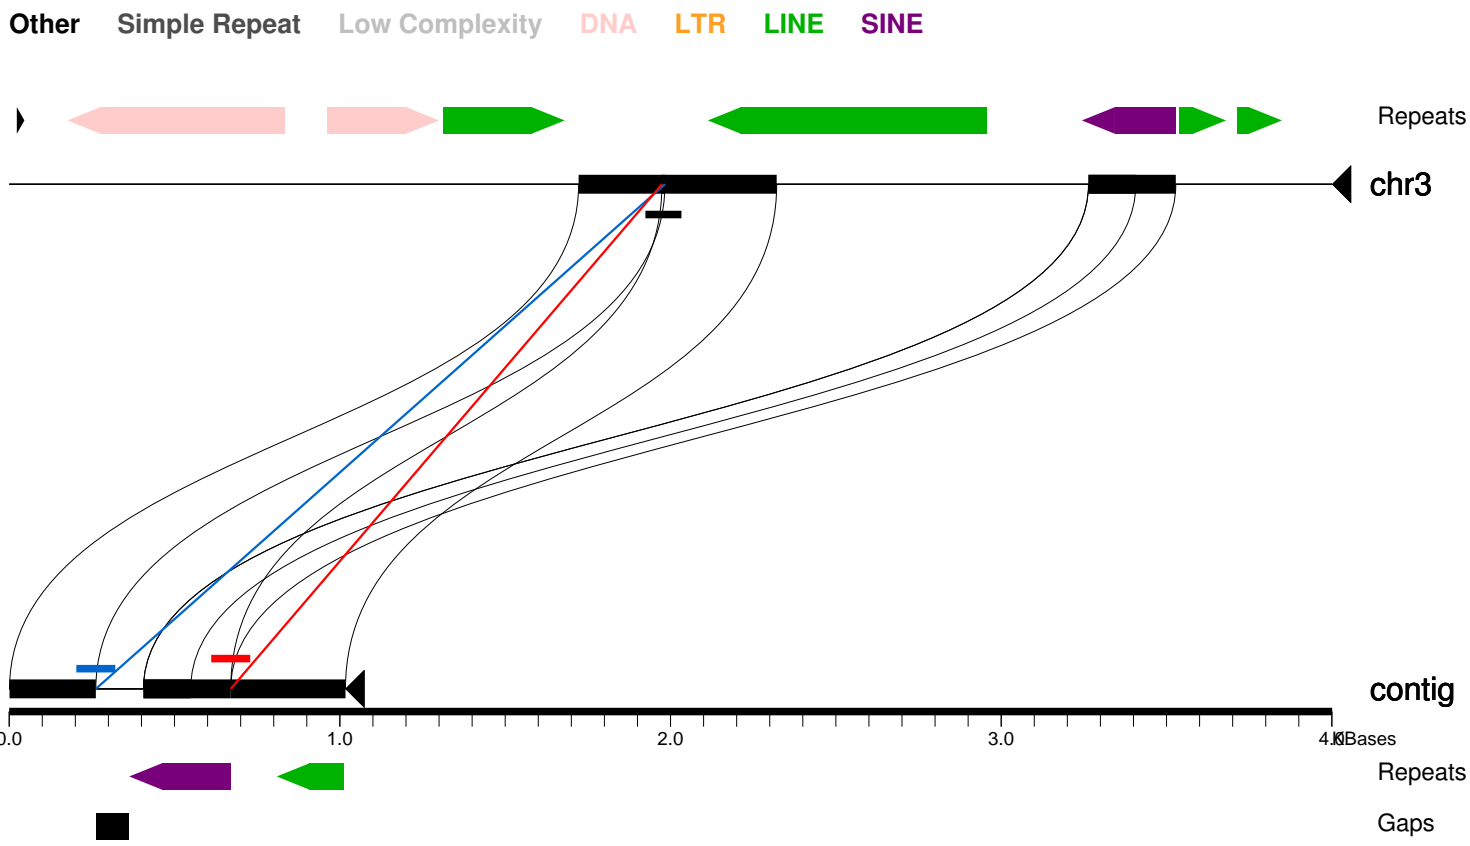

siteID: chr3\_142460042 Scaffoldig2 + Breakpoint: chr3:142460024

chr3:142459980-142460083

Overlap Length: 16 INS size: 298 Genotyped: Yes

```

left  AATAT-----CTGAGAAATTGGAAAGCAAA-CTAGTGAG----GATTTTTTGTATAACTATGTA
chrom AATAT-----CTGAGAAATTGGAAAGCAAA-CTAGTGAG----GATTTTTTGTATAACTATGTA
right CCGCCCGCCTCGGCCTCCCAAAGTGTCTGGGATTACAGGCGTGAGCCACCGCGCCCGGCCATAACTATGTA
      111111111111111111**111***1**1111*111*1*111*****11111*1111111111******

```

```

left  TTTTTTTTTTTTTTTTTTTTTTTGGACGGAGTCTCGCTCTGTCGCCAGGCTGGAGTGCAGTGG
chrom TTTTAAAATAATTT-----AAAACATTTATTTCTCT----CATAACTGCCATTGATT--
right TTTTAAAATAATTT-----AAAACATTTATTTCTCT----CATAACTGCCATTGATT--
      ***2222*22***22222222*2*22222*2*22***2222*2222***222*22*2*22

```

Other   Simple Repeat   Low Complexity   DNA   LTR   LINE   SINE

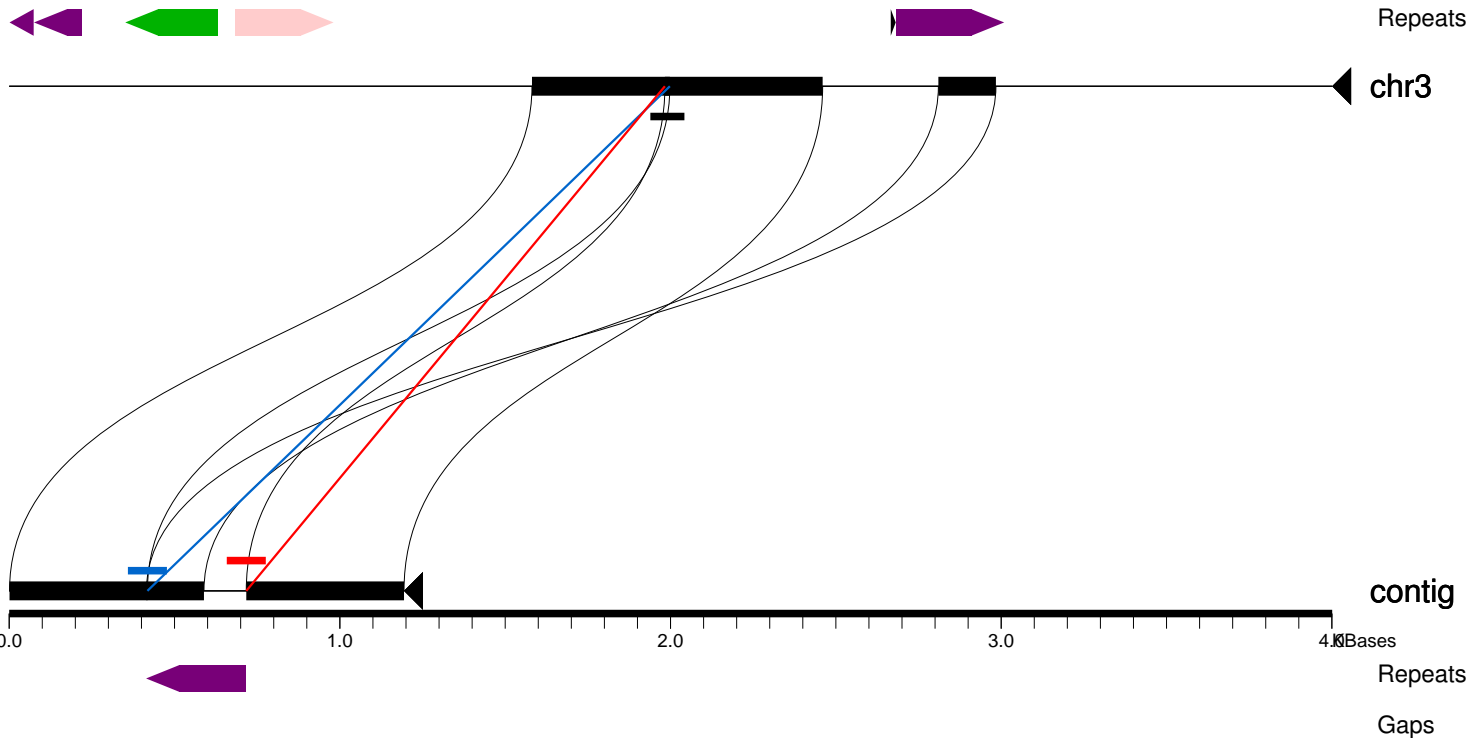

siteID: chr3\_142647422 Scafftig1 + Breakpoint: chr3:142647434

chr3:142647389-142647493

Overlap Length: 15 INS size: 292 Genotyped: Yes

```
left   TTA----ATGTTTTTA-TATCACTTATCTTTGA----AAG-----GCCATCTTAGGTGAGCTGCTCAGAGT
chrom  TTA----ATGTTTTTA-TATCACTTATCTTTGA----AAG-----GCCATCTTAGGTGAGCTGCTCAGAGT
right  TCCGCCCATCTCGGCCTCCCAAAGTGCTGGGATTACAGGCCGTGAGCCACCGCGCCCGCCCTGCTCAGAGT
      *1111111*1*111111*11**111111**11**11111*1*111111****1*111111*11*****
```

```
left   CTTTTTTTTTTTTTTTTTGGAGACGGAGTTTCGCTCTGTTCGCCAGGCTGGAGTGCAGTGGCGCGA
chrom  CTTTAA-----AAGCTACATTTCCCCCTCCTTTCTTACTTTAAATATAATGGT---A
right  CTTTAA-----AAGCTACATTTCCCCCTCCTTTCTTACTTTAAATATAATGGT---A
      ***222222222222222*22*2222*****2*2**22222*22222*22*2*22*2***2222*
```

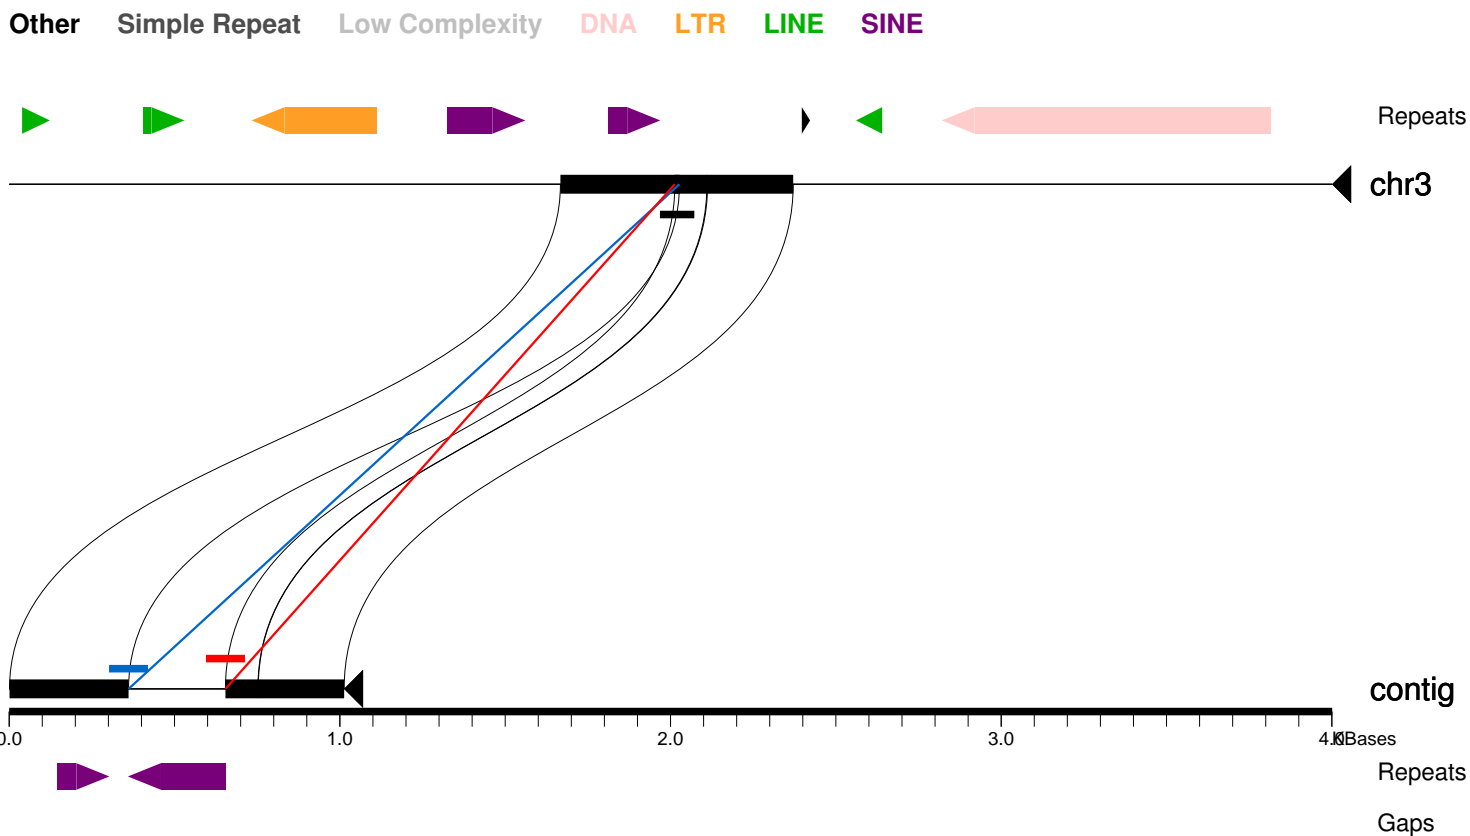



siteID: chr3\_144503149 Scaffitg1 + Breakpoint: chr3:144503130

chr3:144503083-144503189

Overlap Length: 13 INS size: 463 Genotyped: No

```

left  CTCTTTGTTTAGACTGCCT----TGCAGACATACCATGC-TGAATTAGTTTT-----TAGTGCAATTC
chrom CTCTTTGTTTAGACTGCCT----TGCAGACATACCATGC-TGAATTAGTTTT-----TAGTGCAATTC
right CCGCCCGCCTCGGCCTCCCAAAGTGCTGGGATTACAGGCGTGAGCCACCGCGCCCGGCC-TAGTGCAATTC
      *11111*11*1*1*11**11111***1*11**11**1**1***111*1111111111111*****
    
```

```

left  TTTTTTNNNNNNNNNNNNNNNNNNNNNNNNNNNNNNNNNNNNNNNNNNNNNNNNNNNNNNNNNNNNNNNN
chrom TTAAT-----ACAAATTTTGAATAGCCCCAAATAGTCAACTCAAAATTTATGGC
right TTAAT-----ACAAATTTTGAATAGCCCCAAATAGTCAACTCAAAATTTATGGC
      **22*22222222222222222222222222222222222222222222222222222222222222
    
```

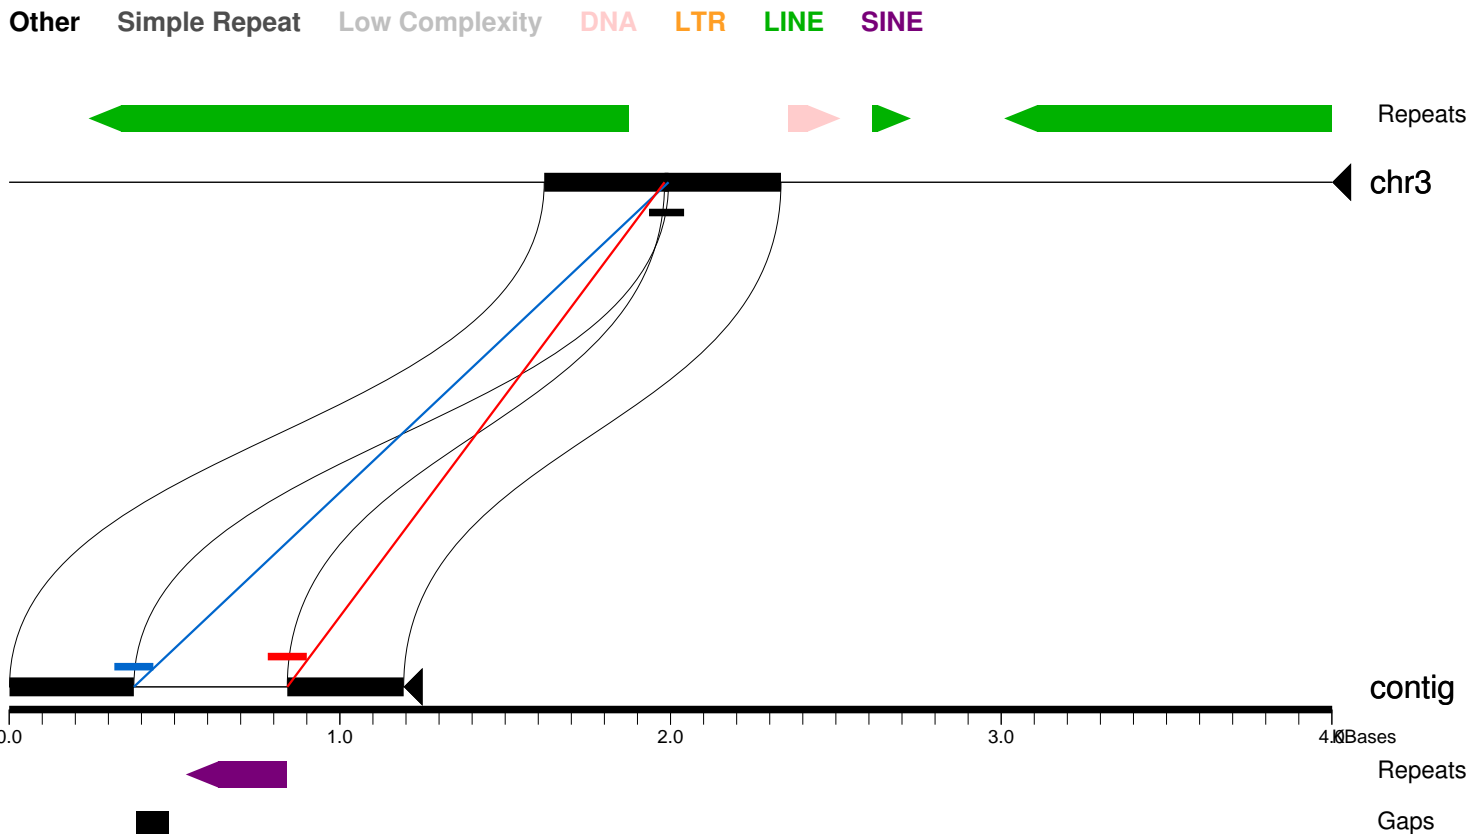

siteID: chr3\_144687863 Scaffitg3 - Breakpoint: chr3:144687869

chr3:144687709-144688044

Overlap Length: 16 INS size: 309 Genotyped: Yes

```

left  -----TGAATA
chrom ATGGGCATATTACATGATTTCTCTGTGACTAAGACAACAATGTAAAAACCATTTTTTATTGAAC TGAATA
right TACCACGCCCGGCTAATTTTTTGTATTTTTA-----GTAGAGACGGGGTTTCACCGTGTTAGCCA
NNNNN2NNNNNN2NNNN222N2N2N2NNN22                222N2N22NNNN222N2NN2NNN*1111*
  
```

```

left  TATTGGTGAGCCATCTGCCTCACACACTGGACAGCCCATTAATATGTTTCTTGAAAAGTTATTTATATGGT
chrom TATTGGTGAGCCATCTGCCTCACACACTGGACAGCCCATTAATATGTTTCTTGAAAAGTTATTTATATGGT
right GGATGGTCT-CGATCT-CCTGACCTCGTGATCCGCCCGCC--TCGGCTCCC-AAAGTGCT-----GG-
111****111*1****1**1****1**1111*11*1****11111*11*11*111*****11*111111**1
  
```

```

left  CTTTTTGGACATTTTGGCATTTGGTTTGTAAATTTAT TATTTATTATTTAT-----TTATTATTATT
chrom CTTTTTGGACATTTTGGCATTTGGTTTGTAAATTTAT TATCAACAATTA AACATGAGGATGAGCCATAGATG
right -----GA-----TGGTTTGTAAATTTATTATCAACAATTA AACATGAGGATGAGCCATAGATG
11111111**111111111111******1111*2*2222*2*2222*2*2222*2*2222*2*2222*2*2
  
```

```

left  TATTTTATTTTATTTTATTTT-----TTGAGACGGAGTCTCGC-TCTGTGCGCCAGGCTGGAGTGCAGT
chrom GATC--AAGGCATTTTGTAGCCTTCTGTTGATATTCTCTCAGGCCTGAGTTATGCAGCCTTGGCTGGGT
right GATC--AAGGCATTTTGTAGCCTTCTGTTGATATTCTCTCAGGCCTGAGTTATGCAGCCTTGGCTGGGT
2**22*2222*****2*2222**2*2****2*2222**22**2*22**2222***2**2*22**222*
  
```

```

left  GGCGGATCTCGGCTCACTGCAAGCTCCGCTCCCGGTTTCAGCCATTCTCCTGCCTCAGCCTCCCGAG
chrom TGC-CACTGGCTTCTCAGTCATAGC-----CTTCAGAGGTG TAAAAATAT-----GCATGATGGTTTACA-
right TGC-CACTTGTCTCAGTCATAGC-----CTTCAGAGGTG TAAAAATAT-----
2**2*22*N2*22****2*222**2222*2**222**22*2222**22222211N1N1NNN1NNNN12
  
```

```

left  TAG
chrom ---
right ---
      222
  
```

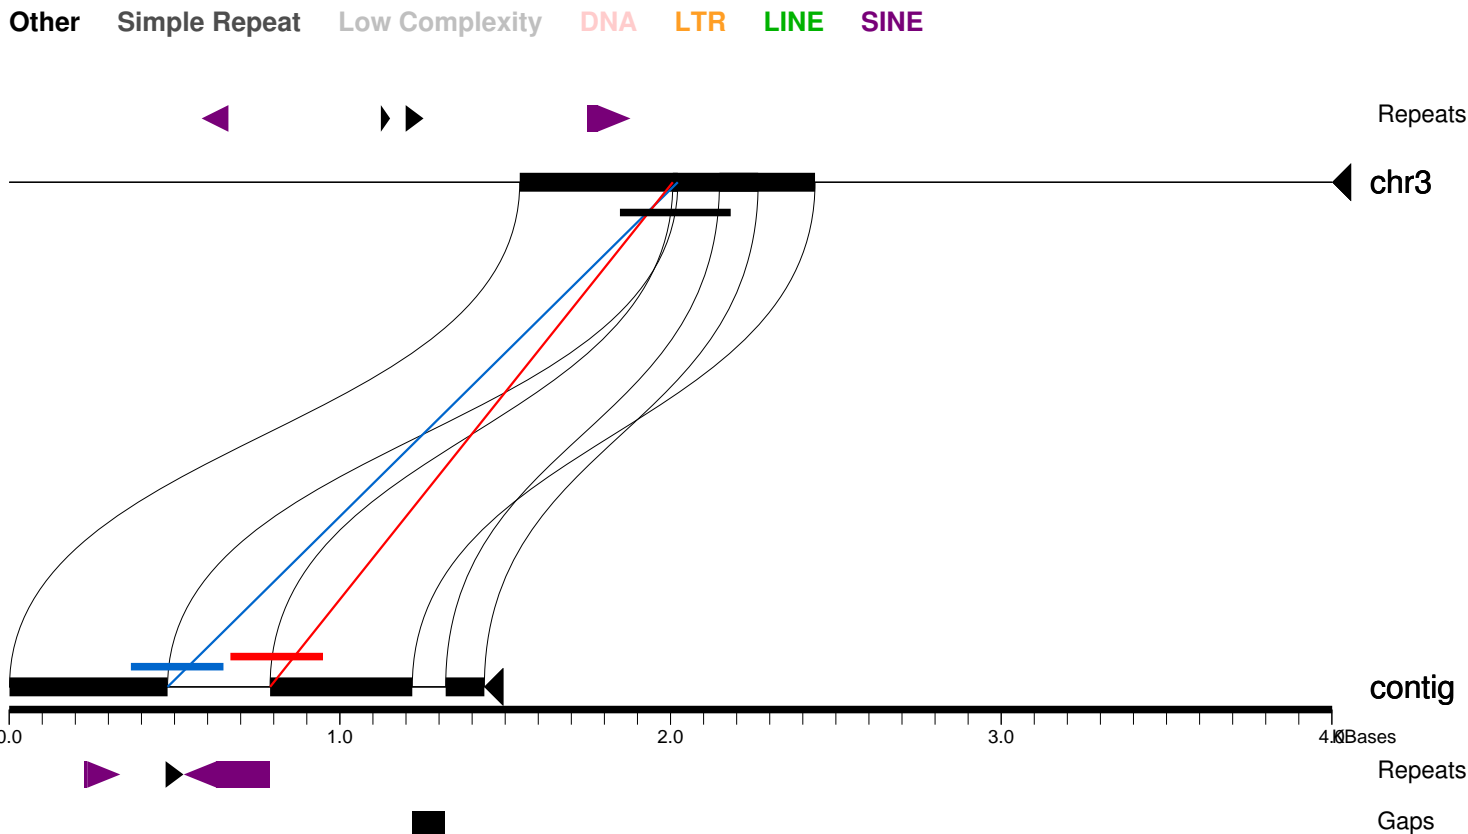

siteID: chr3\_145244356 Scafftig1 + Breakpoint: chr3:145244337

chr3:145244292-145244396

Overlap Length: 15 INS size: 312 Genotyped: Yes

```
left   TCTTC-----TCTTCTAAATAGCATATGGTTAGTT-CGTG---CTTTTTTATTG--CGATATTTTA
chrom  TCTTC-----TCTTCTAAATAGCATATGGTTAGTT-CGTG---CTTTTTTATTG--CGATATTTTA
right  TCCGCCCGCCTCGGCCTCCCAAAGTGC-TGGGATTACAGGCGTGAGCCACCGCGCCTGGCCGATATTTTA
      **11*111111111111**1*1***11**1*11*1***1111****111*11111111**11*****
```

```
left   CTTTTTTTTTTTTTTTTTTTTTTTTTTTTTTTTTTTTTTT-TGAGACGGAGTCTCGCTCTGTGCGCCAG
chrom  CTTTTAATTAGAGTGTTCATAGAACAAATAACAATAATGAGATTGAAGCT-----
right  CTTTTAATTAGAGTGTTCATAGAACAAATAACAATAATGAGATTGAAGCT-----
      ****22**2222*2**222*2222222*22222*22*****22**22**22222222222222
```

Other Simple Repeat Low Complexity DNA LTR LINE SINE

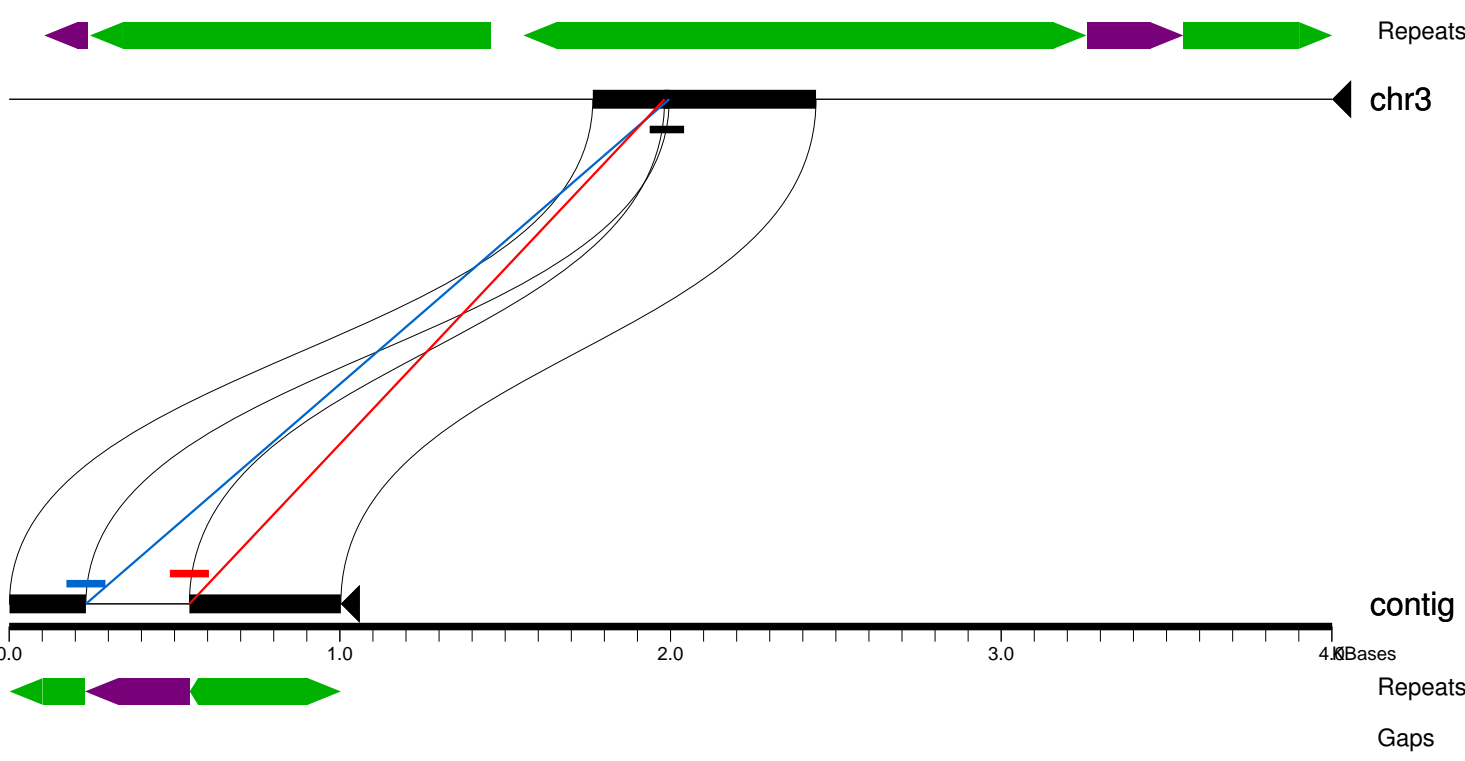



siteID: chr3\_145997653 Scafftig4 + Breakpoint: chr3:145997652

chr3:145997569-145997717

Overlap Length: 8 INS size: 372 Genotyped: No

left GTATAAAATTTGTGCTTAAAGTTTACAATACTGTATTAAAACTTACACATTTGTTTAGAAG-TAGATCTCA  
chrom GTATAAAATTTGTGCTTAAAGTTTACAATACTGTATTAAAACTTACACATTTGTTTAGAAGGTAGATCTCA  
right CCTCGGCCT----CCCAAAGTG-----CTGG-----GATTACAGGCGTGAGCC--  
111111111\*1111\*11\*\*\*\*\*111111111\*\*\*11111111111111111111\*1\*\*\*1\*1\*N11\*\*1\*111

left TTAAGTGTTCCTG--CCACAGTTNNNNNNNN--NNNNNNNNNNNNNNNNNNNNNNNNNNNNNN-----  
chrom TTAAGTGTTCCTG--CCACAGTTTTTTTTGT--AAAGCTACAATTTTGCCTCAGTTATTCCACAATGACTT  
right ---ACCGCGCCCGGC CCACAGTTTTTTTTTTTAAAGCTACAATTTTGCCTCAGTTATTCCACAATGACTT  
111\*\*1\*11\*11\*11\*\*\*\*\*22222N2112222222222222222222222222222222222222222222222222222222

left -----  
chrom ACTAAGATTTCTC  
right ACTAAGATTTCTC  
22222222222222

Other Simple Repeat Low Complexity DNA LTR LINE SINE

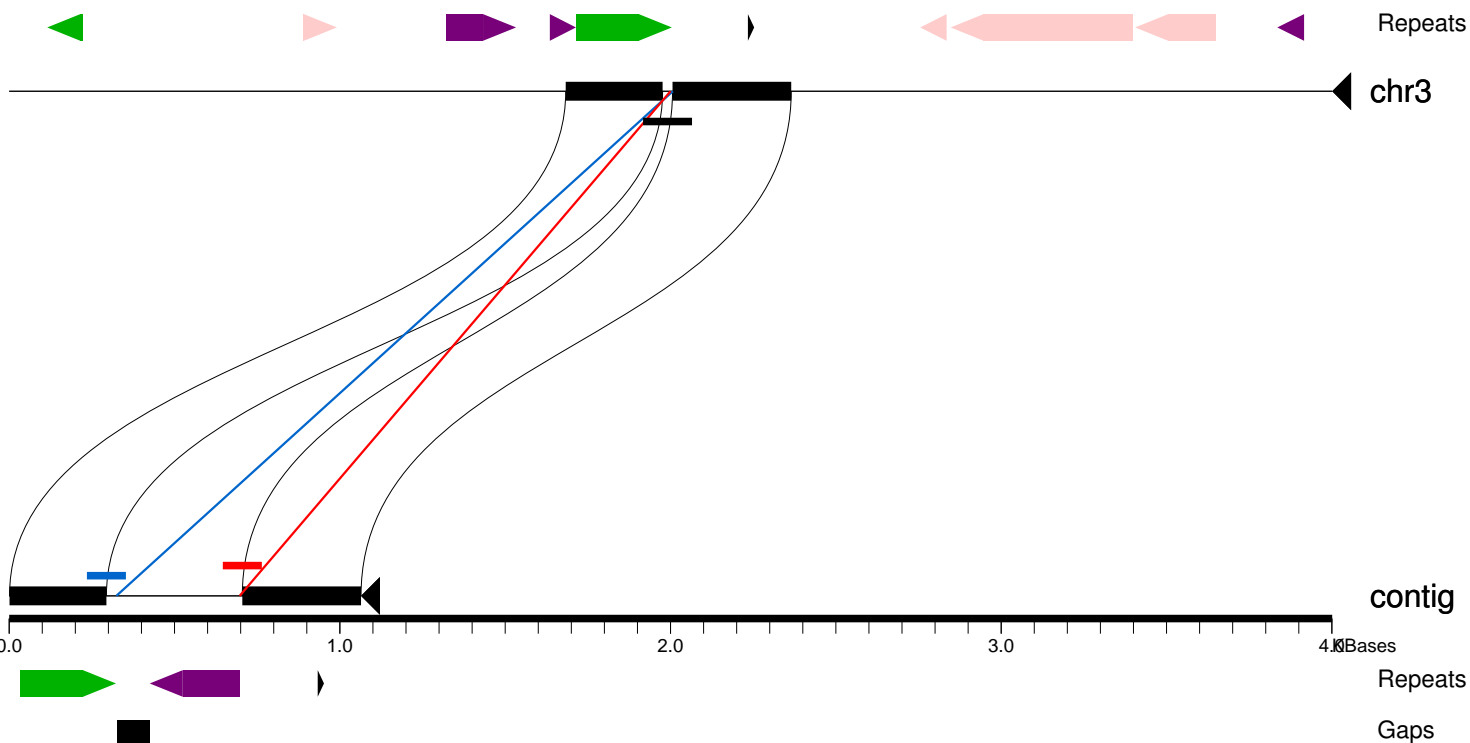

siteID: chr3\_149142397 Scafftig1 - Breakpoint: chr3:149142378

chr3:149142330-149142437

Overlap Length: 12 INS size: 345 Genotyped: No

```

left    CGTATTATTTCTGCTTTAAAATGTTTCATGTCCTTTGCCCTTCTATTAA-----GATAATTTTGC
chrom   CGTATTATTTCTGCTTTAAAATGTTTCATGTCCTTTGCCCTTCTATTAA-----GATAATTTTGC
right   NNNNNNNNNNNNNNNNNNNNNNNNNNNNNNNNNNNNNNNNNNNNNNNNNNNNNNNNNNNNNNNNNNN
11111111111111111111111111111111111111111111111111111111111111111
          *****

```

```

left    TGGCCGGGCGTGGTGGCTCACGCCGTGTAATCCCAGCA-CTTTGGGAGGCCGAGGCGGGTGG
chrom   TTTTATTAATT--TGAAATAACTTTTTAATAGCAAAAACATTAATATT-----TGC
right   TTTTATTAATT--TGAAATAACTTTTTAATAGCAAAAACATTAATATT-----TGC
          *222222222*22**2222*2222*2*****22**22*2*2**22*222222222222**2

```

Other Simple Repeat Low Complexity DNA LTR LINE SINE

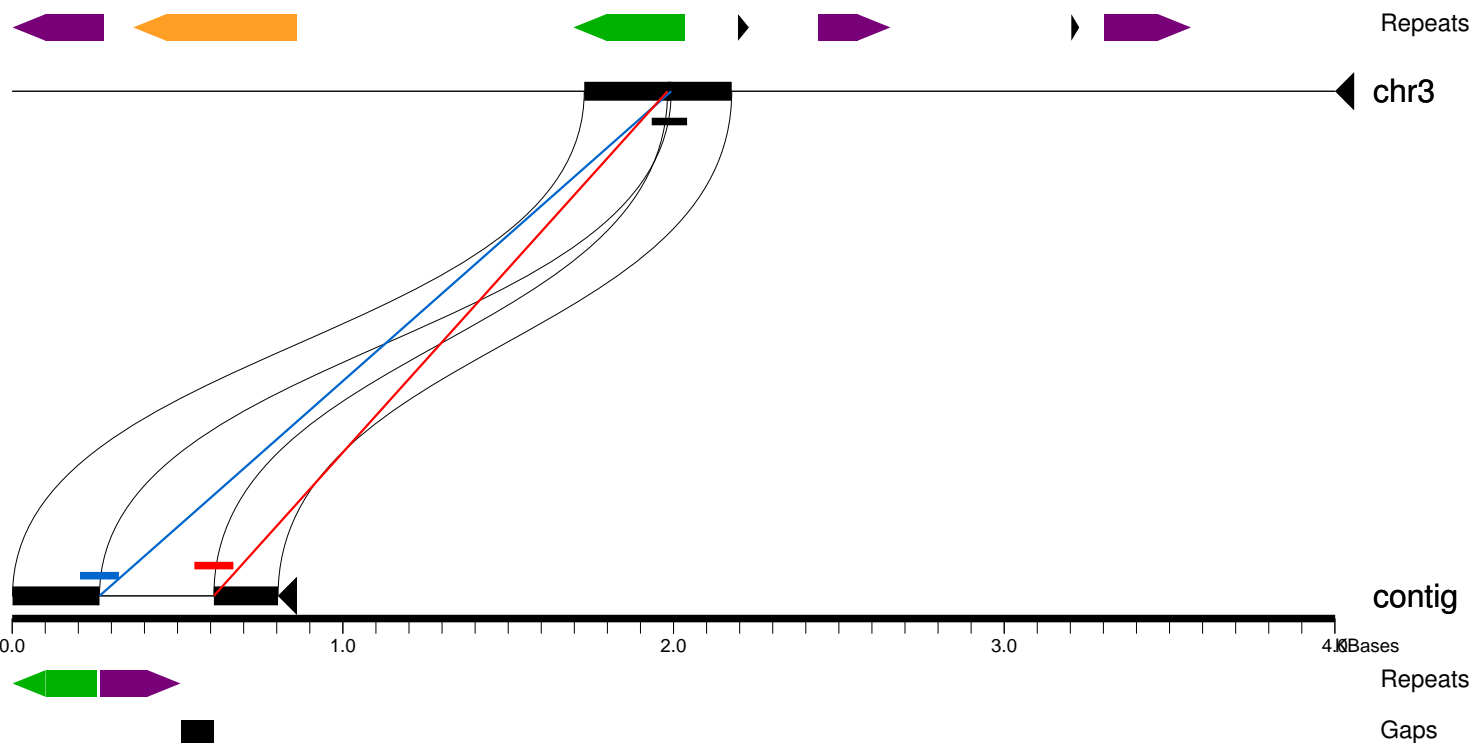



siteID: chr3\_15294338 Scaffold1 + Breakpoint: chr3:15294334

chr3:15294286-15294386

Overlap Length: 9 INS size: 307 Genotyped: Yes

```
left  A-----AGAATTG-----ATACTTTAACTTGGACCTTGAAGGTAAAGCTTCAAAAAGAC-----AGAT
chrom A-----AGAATTG-----ATACTTTAACTTGGACCTTGAAGGTAAAGCTTCAAAAAGAC-----AGGT
right ACTGCACTCCAGCCTGGGCGACAGAGCGAGACTCCGTCTCAAAAAAAAAAAAAAAAAAAAAAAAAAAAAAGGT
      *1111111111**11*1*111111*1*111111***11*1*1111**111***111111*****1*111111**2*
```

  

```
left  TACTGGCCGG-GCGCGGTGGCTCACGCCGTGTAATCCCAGCACTTTGGGAGGCCGAGGCGGGCGGATCA
chrom TACTGACCATTGAGTGTTTACTA-----TGTA--CCCAA-----TGTGTATATTTTTTC-----TTT
right TACTGACCATTGAGTGTTTACTA-----TGTA--CCCAA-----TGTGTATATTTTTTC-----TTT
      ****2**222*2*2*2*22**222222****22****222222**2*222222222*22222222*22
```

Other Simple Repeat Low Complexity DNA LTR LINE SINE

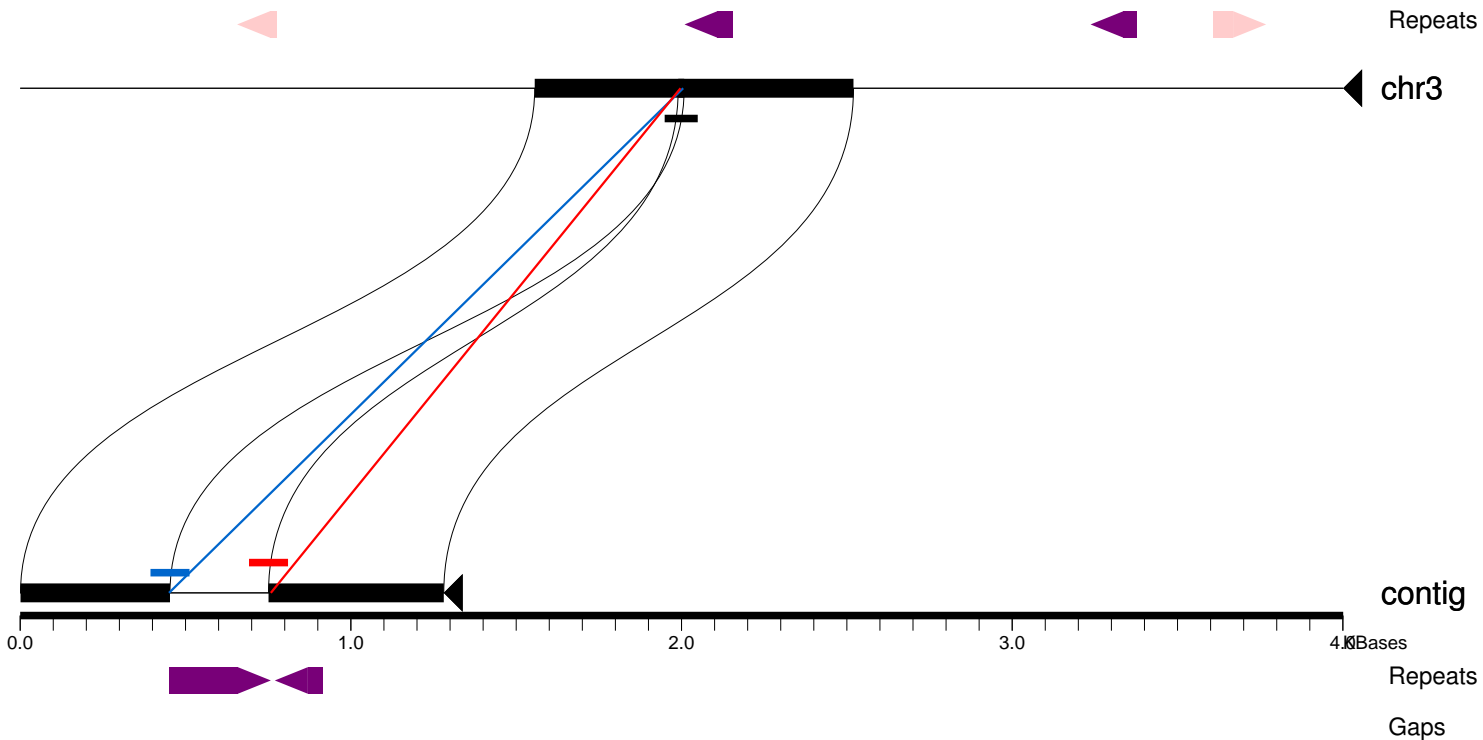



siteID: chr3\_154966222 Scafftig2 + Breakpoint: chr3:154966214

chr3:154966155-154966276

Overlap Length: -2 INS size: 306 Genotyped: Yes

```

left   TCTTTCATAGTGTGACAATTCTTCCATAGAGTAGCATGTGGGATGAACCTTAAAAAGTC TCGGCCGGGCG
chrom  TCTTTCATAGTGTGACAATTCTTCCATAGAGTAGCATGTGGGATGAACCTTAAAAAGTC TTTAT--GACA
right  ACTCC---AGCCTGGGCGACAGAGCGAGACTCCGTCTCAAAAAAAAAAAAAAAAAAAAAAAAAATAAAT--GACA
       1**11111**11*1*1*1*11111*1*1*111111*1111111*11**1111****111*NN2222*2*2

left   CGGTGGCTCAC-GCCTGTAATCCCAGCACTT----TGGGAGGCCGAGGCGGGCG--
chrom  CTGTGACCTAGAGACTG-ACTTAGAGATGTTGTCTTTGGAGGC-GAGTAGACCACT
right  CTGTGACCTAGAGACTG-ACTTAGAGATGTTGTCTTTGGAGGC-GAGTAGACCACT
       *2***2*22*22*2***2*2*222**222**2222*2*****2***22*22*222

```

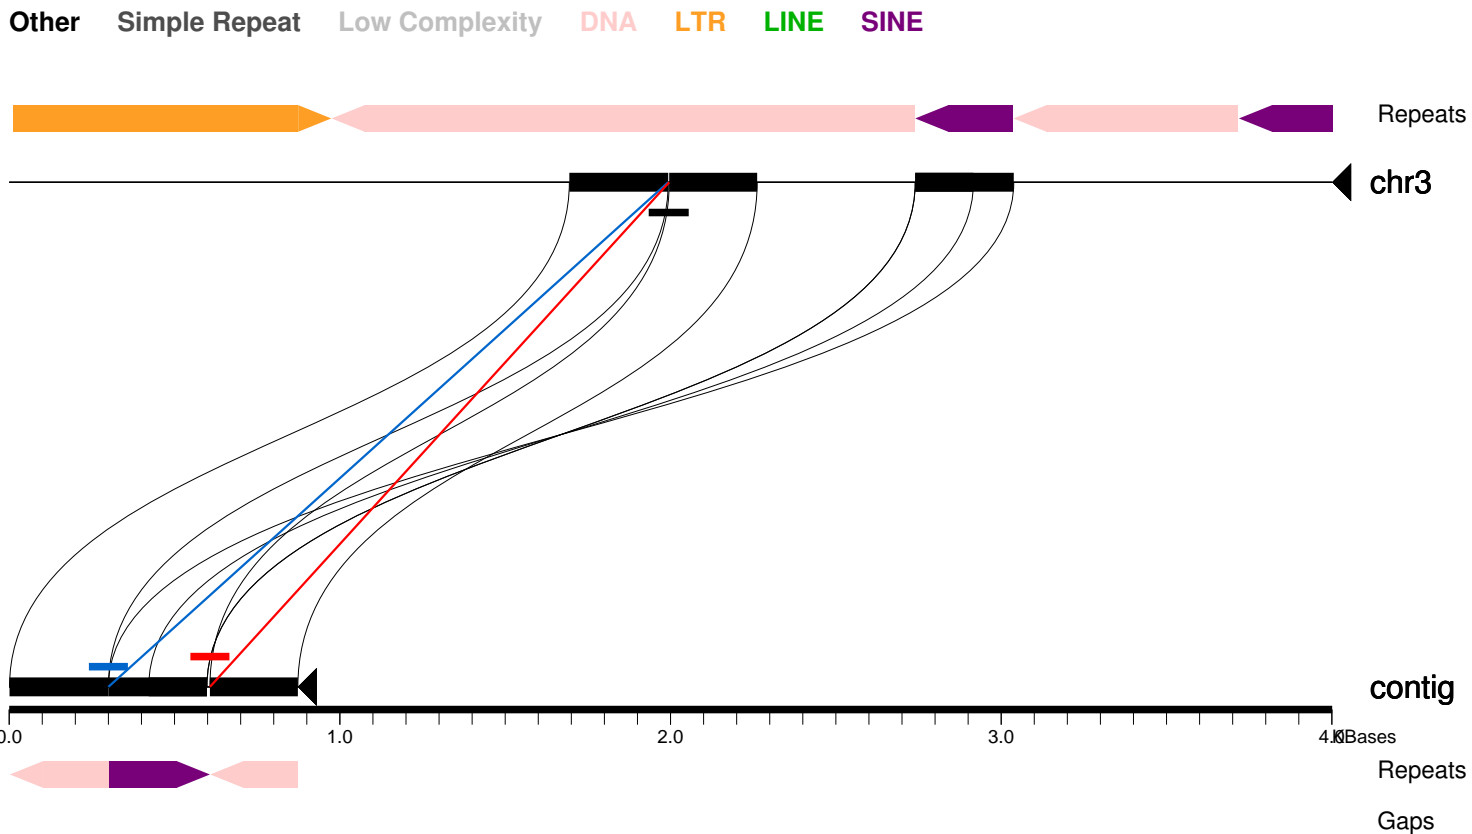

siteID: chr3\_155040659 Scafftig11 + Breakpoint: chr3:155040661

chr3:155040616-155040720

Overlap Length: 15 INS size: 158 Genotyped: Yes

```
left   TTCATACATAAAATATTTAATTCACAATCTCTCTA-----TAGTATTAAAT-----GAAAAGCA
chrom  TTCATACATAAAATATTTAATTCACAATCTCTCTA-----TAGTATTAAAT-----GAAAAGCA
right  TTCACGCC---ATTCTCCTGCCTCAGCCTCCCGAGTAGCTGGGACTACAGGCGCCCGCCACCAGAAAAGCA
      ****11*1111**11*11111*1**11***1*1*11111*1*1*1**1*1111111111111111*****
```

```
left   AATTCTTTTTTTTTTTTTTTTTGAGACGGAGTCTCGCTCTGTCGCCAGGCCGACTGCGGACTGCA
chrom  AATTCTTATCACTGTAT-----ACGCA-----TAGGAAAAAGAGACAGATAACCAAAATAGTA
right  AATTCTTATCACTGTAT-----ACGCA-----TAGGAAAAAGAGACAGATAACCAAAATAGTA
      *****2*222*2*2*222222***2*222222*22*222222**2*2*2222222*22*2*
```

Other    Simple Repeat    Low Complexity    DNA    LTR    LINE    SINE

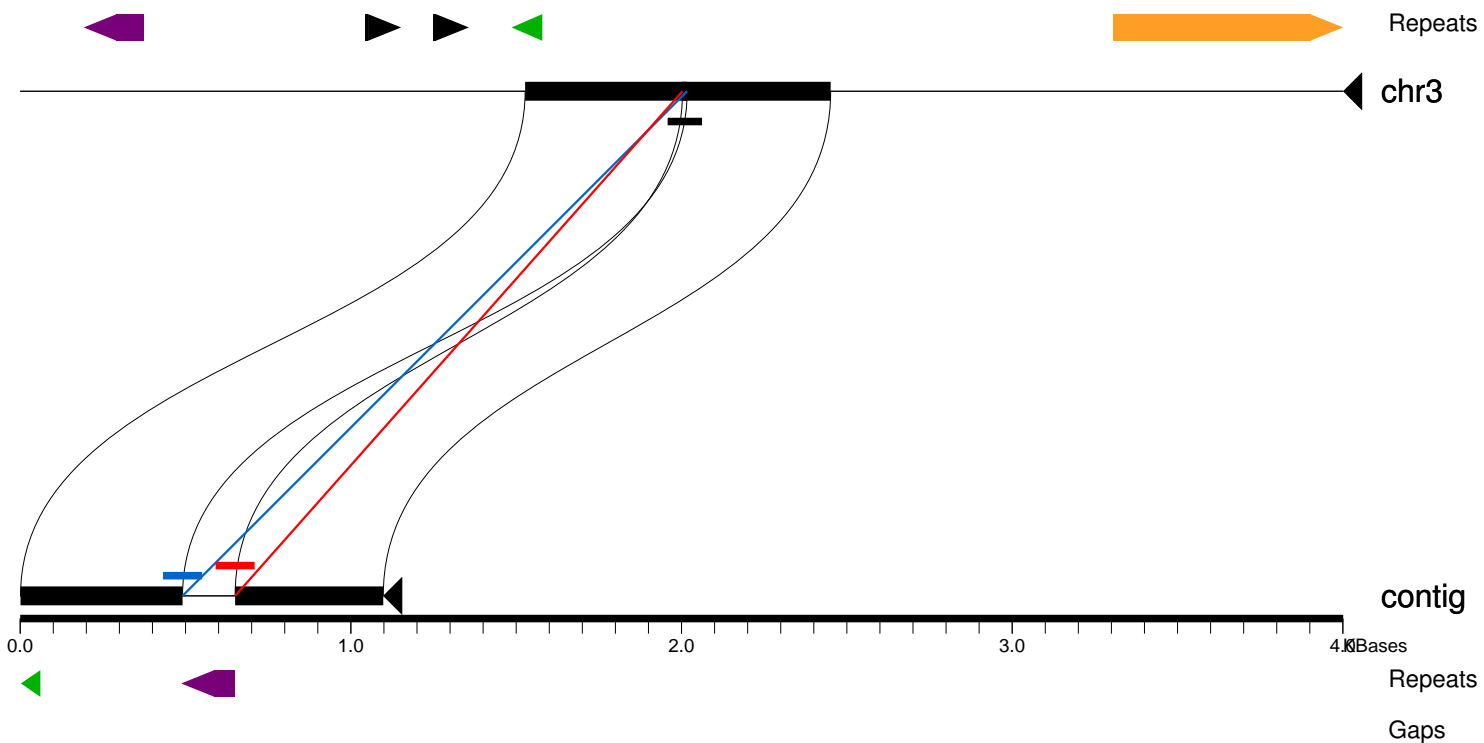

siteID: chr3\_156239864 Scafftig5 + Breakpoint: chr3:156239874

chr3:156239714-156240042

Overlap Length: 9 INS size: 299 Genotyped: Yes

```
left  -----CAATAAATAAATGCTTTTTTCTTTTAAATTTTTTTTA-CTTTTGGAAGTCTGTCTCTGAAAATG
chrom GGACTCAATAAATAAATGCTTTTTTCTTTTAAATTTTTTTTACTTTTGGAAAGTCTGTCTCTGAAAATG
right T---TTAGTAGAGACGGGGTTTCACCGTTTTAGCCG-----GGATG---GTCTCG----ATC
N     21*1**1*1*111*1***111*1*****111111111N 111111***1*111*****11111**1
```

```
left  GTGTGTATGTGTGTGTGCACACACATACACATATACACACACACATAAATAGAACTTGTAAACCCAATCCTA
chrom GTGTGTATGTGTGTGTGCACACACATACACATATACACACACACATAAATAGAACTTGTAAACCCAATCCTA
right TCCTGACCTCGTGATCCGCCCGCCTCGGCCT-----CCCAAAGTG--CTGGGATTACAGGCCTG
111**111111***111*1*1*1*1*111*1*11111111111*11***11*11**1*1*111**11*1*1
```

```
left  AGAAAGAGAATGCACTGCATACAAGATTTT-----TTTTTTTTTTTTTTTTGAGACGGAGTC
chrom AGAAAGAGAATGCACTGCATACAAGATTTTCAAAAAACGGAAAAAGTTACAAAAGATTGATTGATA---AACC
right AGCCACCGC--GCCCGGC-ACAAGATTTCAAAAAACGGAAAAAGTTACAAAAGATTGATTGATA---AACC
**11*11*111**1*1**11*****222222222222**22222222**22***2*222*22*
```

```
left  TCGCTCTGTGCCCGGCTGGAGTGCAGTGG----CGGGATCTCGG---CTCACTGCAAGC-----
chrom AACCACTCTTTACATGCATGGTATATACTGAAACTCAGAAATTTCTAATACTAATAAGAAGCAATTGTTCA
right AACCACTCTTTACATGCATGGTATATACTGAAACTCAGAAATTTCTAATACTAATAAGAAGCAATTGTTCA
222*2**2*222*22*22***22*22*2**22222*2*2*22**22222**2*2222****22222222
```

```
left  -----TCCGCTCCCGGTTTCACGCCATTCTCTGCCT-----CA-
chrom AAAAGCAGTTGGCTATTAGTTTTCAATCTTTGTTAGTCGGTTTGAATAACAT
right AAAAGCAGTTGGCTATTAGTTTTCAATCTTTGTTAGTCGGTTT-----
22222222*22**22222*22***22*22*22*22*22*22 11
```

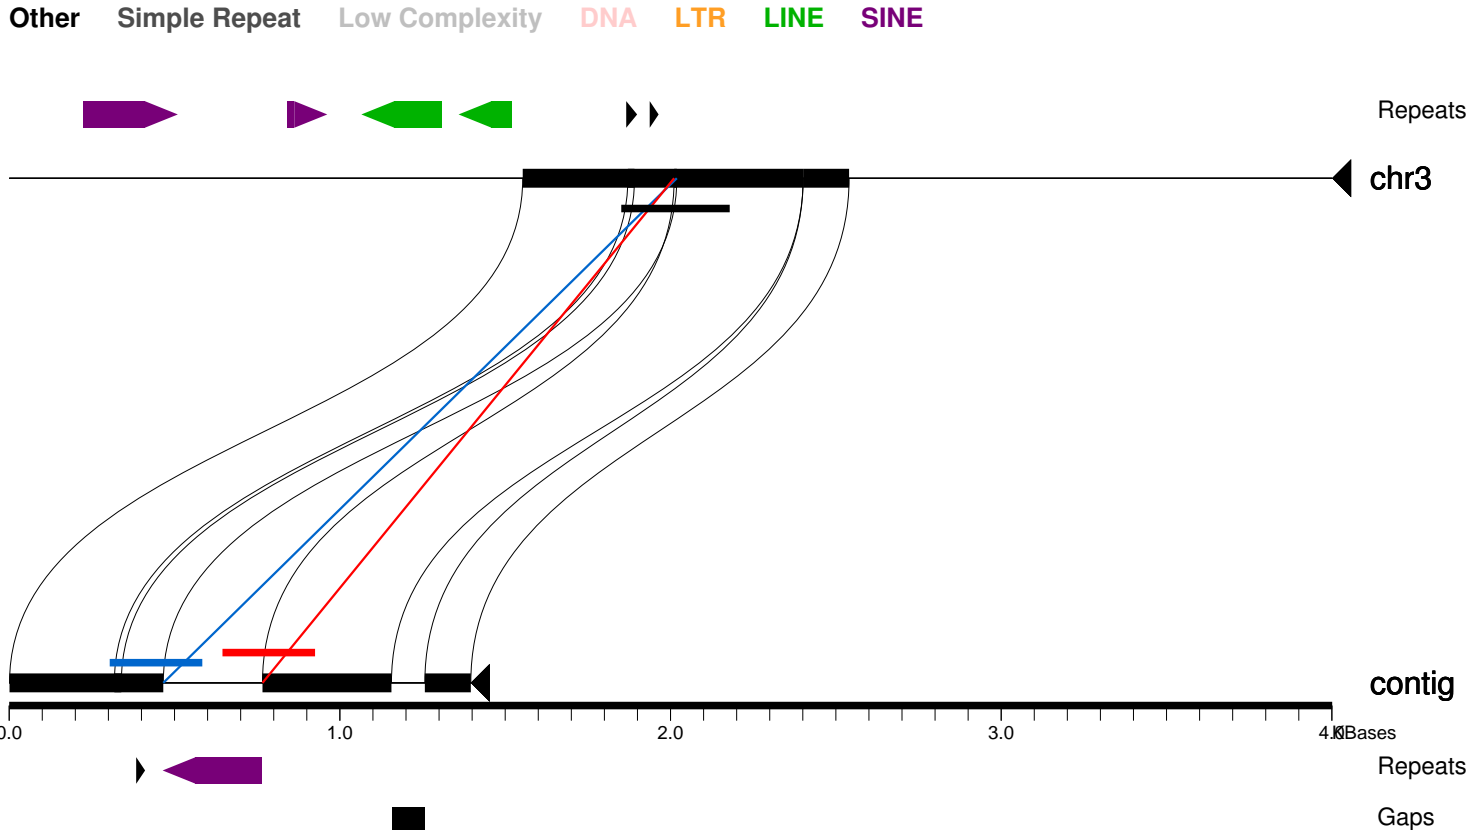



siteID: chr3\_157962941 Scaffitg1 + Breakpoint: chr3:157962921

chr3:157962875-157962980

Overlap Length: 14 INS size: 325 Genotyped: Yes

```
left  TTGTTTTCTCTTGG--TCCTCTAGTTCTTTTGTATTATTAATTTGAGAT-----GTTTCTGGC
chrom TTGTTTTCTCTTGG--TCCTCTAGTTCTTTTGTATTATTAATTTGAGAT-----GTTTCTGGC
right CCACCCGC-CTCGGCCTCCCAAAGTGCTGGGA-TTACAGGCGTGAGCCACCGCGCCCGGCCGTTTCTGGC
      1111111*1**1**11***111***1**111*1***111111****1111111111111111*****
```

```
left  CTTTTTTTTTTTTTTTTTTTTTTTTTTTTTTTTTTTTTTTTTTTTTTTTTTTTTTTTGAGACGGAGTCTCGCTCTGTCG
chrom TTTTGTATGTGGGCATTTAGTGCTATAAAATTTCCCTCTT-----AACATTGCTTTA---
right TTTTGTATGTGGGCATTTAGTGCTATAAAATTTCCCTCTT-----AACATTGCTTTA---
      2***22*2*22222***22*22*2*222***222*2**2222222222*222*2***2*2222
```

Other Simple Repeat Low Complexity DNA LTR LINE SINE

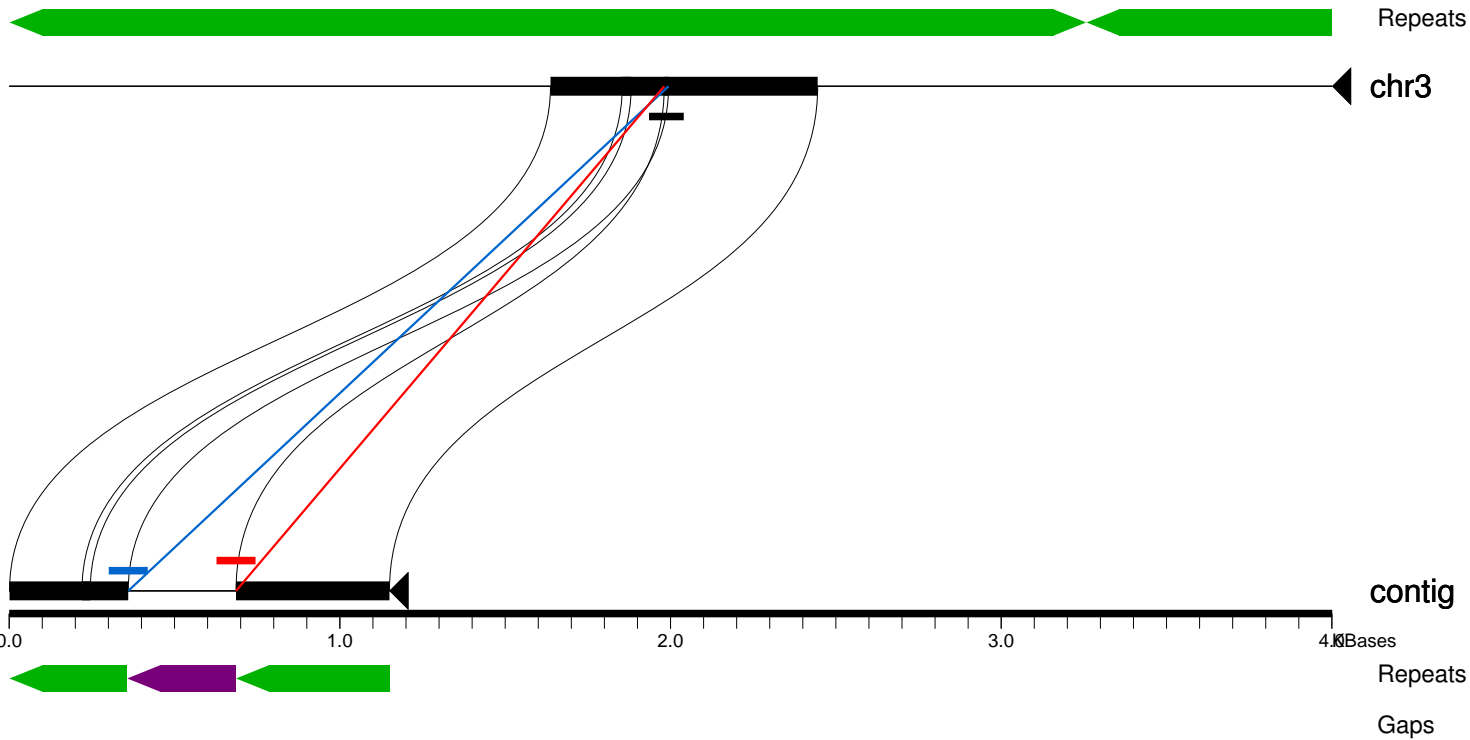



siteID: chr3\_162848534 Scafftig1 - Breakpoint: chr3:162848539

chr3:162848488-162848634

Overlap Length: 9 INS size: 311 Genotyped: Yes

```
left  CACAATGCGATACCACCTTCATCCTGCAAGAATGGCCATAATTGAAAAATCAAAAAACAGGGCCGGGCGC
chrom CACAATGCGATACCACCTTCATCCTGCAAGAATGGCCATAATTGAAAAATCAAAAAACAGTAGATGTTGG
right AAAAA-----CAA-----ACAAACAAACAA--AAAAGACAGTAGATGTTGG
      1*1**11111111111111111111111111111111***1111111111*1**111**1**11***1***22222*22*2
```

```
left  AGTGGCTCACGCCTGTAATCCC---AGCACTTTGGGAG-GCCGAGGCGGGTG-----
chrom CATGAATGT--GCTGAAACAGG---AACACTTTTACACTGTTGATGGGAATGTAAAATAGTACAACCACT
right CATGAATGT--GCTGAAACAGGAGGAACACTTTTACACTGTTGATGGGAATGTAAAATAGTACAACCACT
      22**22*22222***2**2222111*2*****222*22*22**2*2*22**22222222222222222222
```

```
left  -----G
chrom TGGTAAACAGTG
right TGGTAAACAGTG
      22222222222*
```

Other Simple Repeat Low Complexity DNA LTR LINE SINE

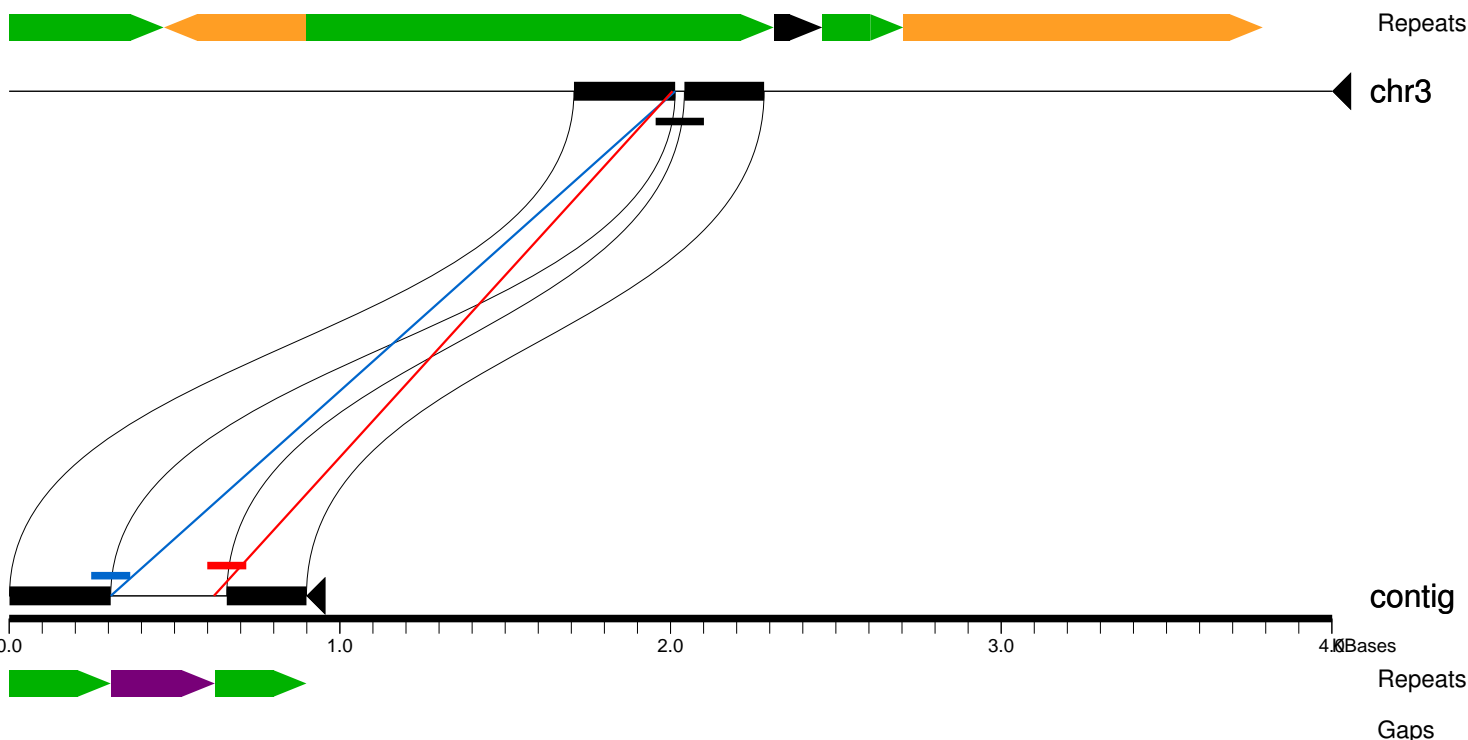

siteID: chr3\_165336813 Scaffitig5 + Breakpoint: chr3:165336810

chr3:165336767-165336869

Overlap Length: 17 INS size: 297 Genotyped: Yes

```
left  ATT-ACAATTCA--AGATGCG-----ATTGTTTGGAG-ACACA---GAGACAAA-CCGTATCAGTA
chrom  ATT-ACAATTCA--AGATGCG-----ATTGTTTGGAG-ACACA---GAGACAAA-CCGTATCAGTA
right CCTCATGATCCACCCGCTCGGCCTCCCAAAGTGTGGGATTACAGGCGTGAGCCACCGCCGTATCAGTA
      11*1*11**1**111*111**11111111*11**1*1***11***11111***1**111*****
```

```
left  GTCTTTTTTTTTTTTTTTGAGACGGAGTCTCGCTCTGTCGCCAGGCGGGACTGCGGACTGCAG-T
chrom  GTCTTTTAA-----AGAAAGACGACAGCGTGGTCATC--AGCAAGACT----TATTCAGAT
right  GTCTTTTAA-----AGAAAGACGACAGAGTGGTCATC--AGCAAGACT----TATTCAGAT
      *****22222222222222222222***22*22222*1222***22*222**22*****222222*2***2*
```

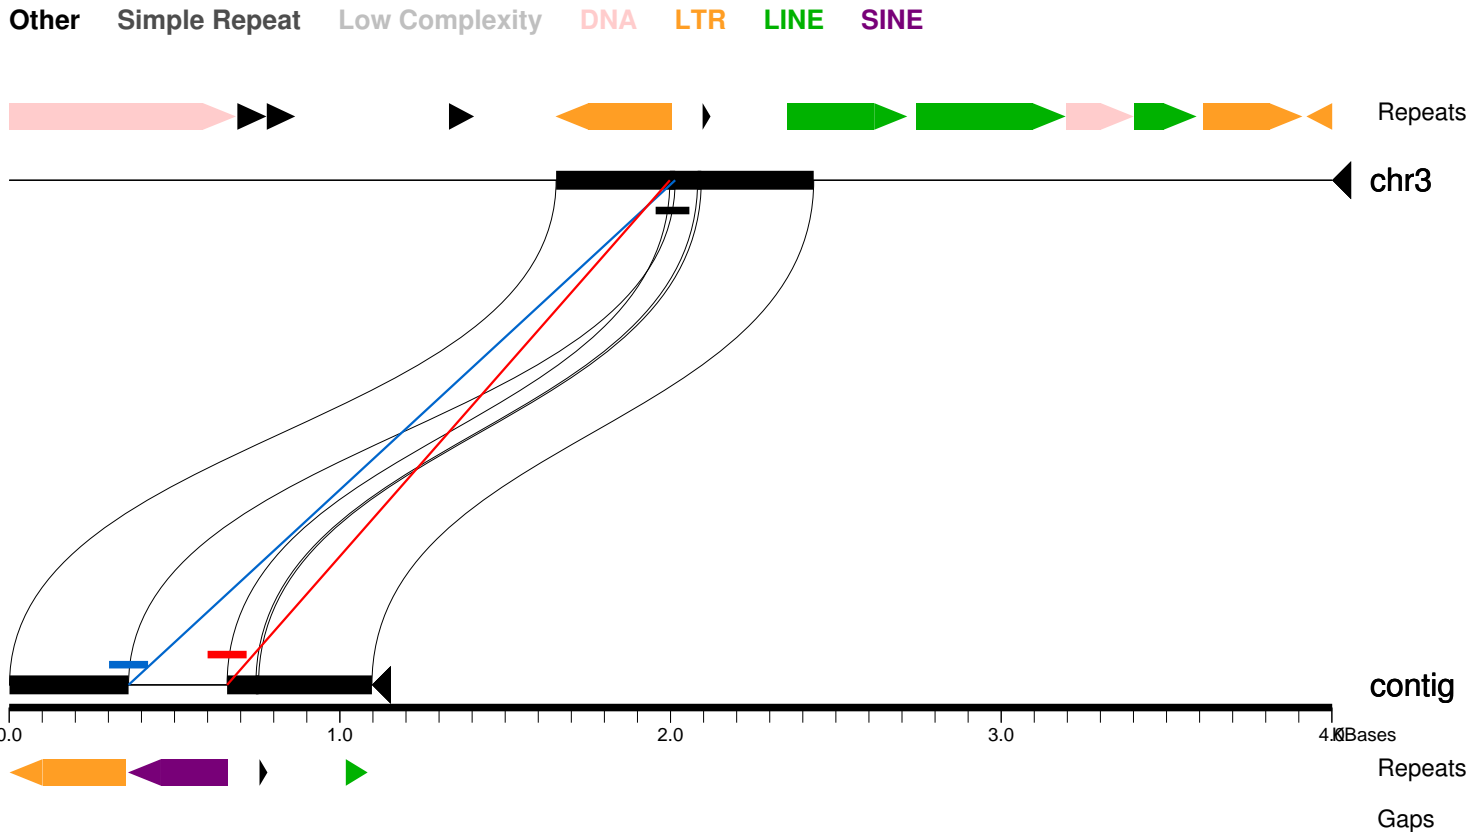



siteID: chr3\_166362327 Scafftig3 + Breakpoint: chr3:166362310

chr3:166362255-166362364

Overlap Length: 5 INS size: 336 Genotyped: Yes

```
left  TGTGAGCATGGTTTATTTGG-TTGGTATTCAGCATTTTCTACTT-----TCCTTTAAAAA--GGGGGG
chrom TGTGAGCATGGTTTATTTGG-TTGGTATTCAGCATTTTCTACTT-----TCCTTTAAAAA--GGGGCA
right TCCGTCTCAAAAAAAAAAAAAAAAAATTAAAAATTAAAAAAAAAAAAAAAAATAAATAAAAAAAAAAAGGGGA
      *111111*111111*111111*111***1*11*11111*11*111111*111*1*****11*****2
```

```
left  CCGGGCGCGGTGGCTCACGCCTGTAATCCAGCACTTTGGGAGGCCGAGGCGGGCGGA
chrom GAGAG-GCACTACATTTACATG-----AG-ACTCTACAATGACTATATCTTTCTC
right GAGAG-GCACTACATTTACATG-----AG-ACTCTACAATGACTATATCTTTCTC
      22*2*2**22*222*22*2*2**2222222**2***2*222*2*2*2*222222222
```

Other Simple Repeat Low Complexity DNA LTR LINE SINE

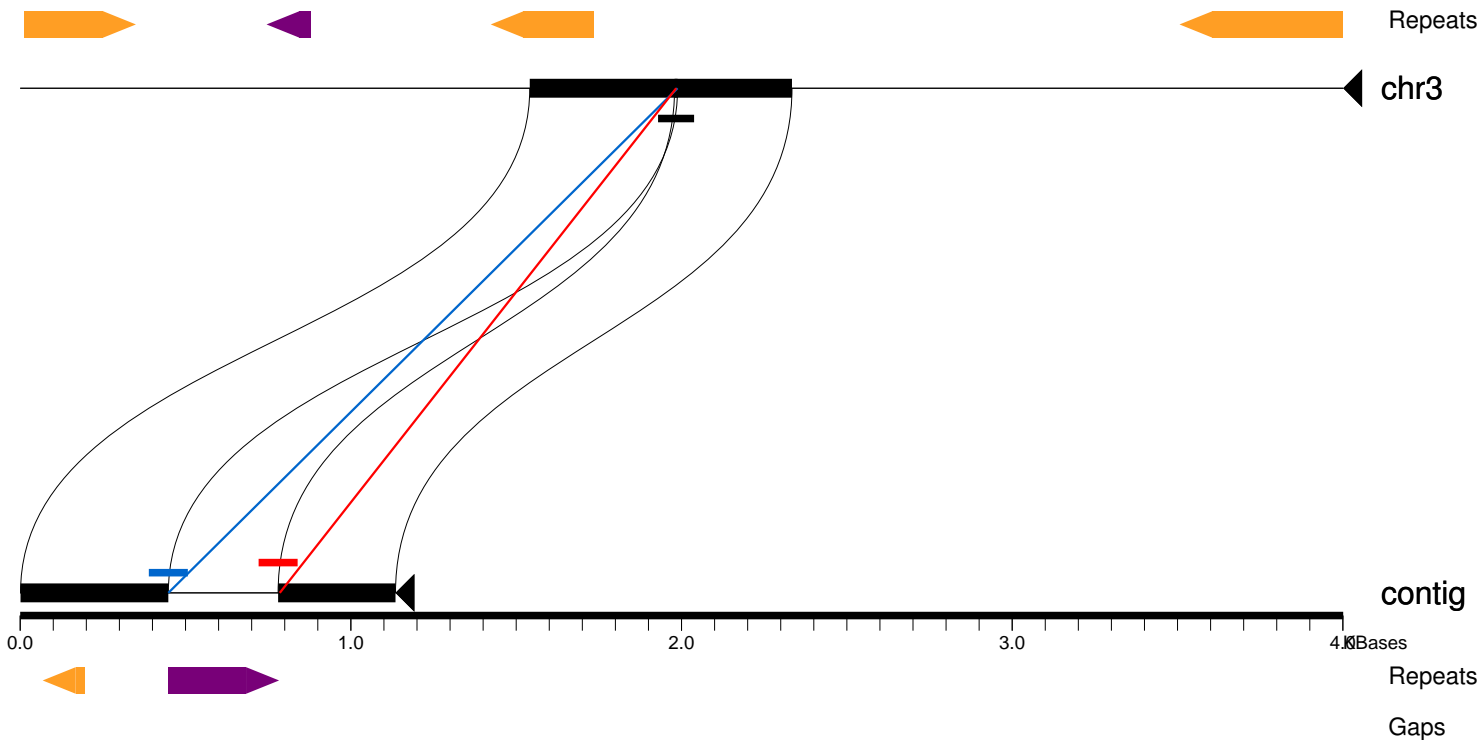

siteID: chr3\_166544607 Scaffitig1 - Breakpoint: chr3:166544589

chr3:166544539-166544648

Overlap Length: 10 INS size: 429 Genotyped: No

```
left  GA-----GAGTTTATAGGTTTTAGAAAGCCCATGCTGTAGCAGGCGGGTGGTAACAGGCTTTAATCN
chrom GA-----GAGTTTATAGGTTTTAGAAAGCCCATGCTGTAGCAGGCGGGTGGTAACAAGCTTTAATCC
right CACCCGCCTCGGCCTCCCAAAGTGCTGGGATTACAGGCGTGAGCCACCGCGCCCGGCCTGGCTTTAATCC
      1*1111111111*11*1111*1**11*1*1*111**1**111***111**1*111111*1*****2
left  NNNNNNNNNNNNNNNNNNNNNNNNNNNNNNNNNNNNNNNNNNNNNNNNNNNNNNNNNNNNNNNNNNNNN
chrom TTTTAAAGCATGCTGTGGGATGGGATATTGGTGTGAGCCGGGTAAGAG-----
right TTTTAAAGCATGCTGTGGGATGGGATATTGGCGTTGAGCCAGGTAAGAG-----
      22222222222222222222222222222222222222222222222222222222222222222222
```

Other Simple Repeat Low Complexity DNA LTR LINE SINE

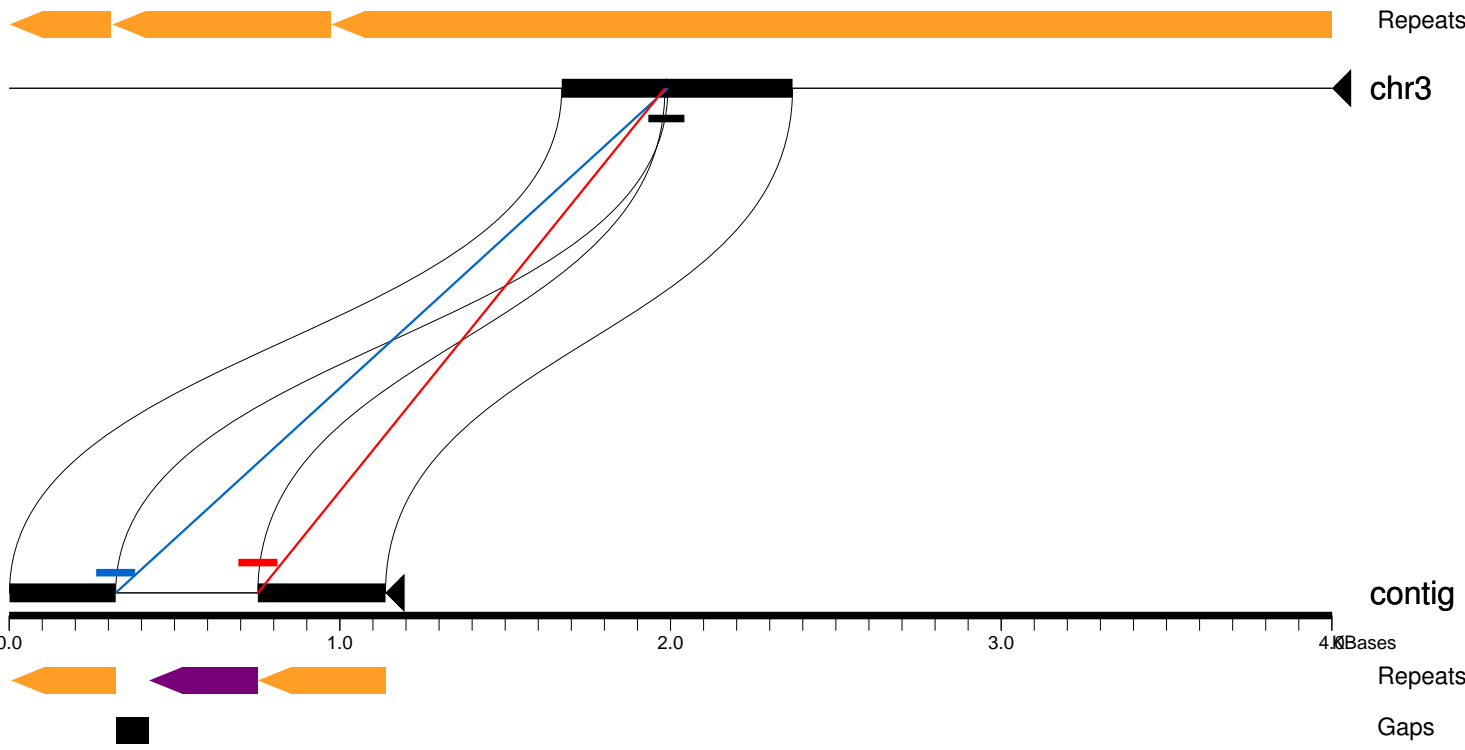



siteID: chr3\_168199063 Scafftig1 + Breakpoint: chr3:168199063

chr3:168199011-168199122

Overlap Length: 6 INS size: 412 Genotyped: No

```
left  AGTGGATCTGTTTTGG---CCCATAG-GCTGC-----CTGTTTATAGCCACTGGTATACTGCATGCCNNN
chrom AGTGGATCTGTTTTGG---CCCATAG-GCTGC-----CTGTTTATAGCCACTGGTATACTGCATGCCCTGA
right TCCGC--CCGCCTCGGCCTCCCAAAGTGTGGGATTACAGGCCTGAGCCACCGCGCCCGGCATGCCTGA
      111*111*1*11*1**111****1**1****111111*1*11111*****1*11111111******222
```

```
left  NNNNNNNNNNNNNNNNNNNNNNNNNNNNNNNNNNNNNNNNNNNNNNNNNNNNNNNNNNNNNNNNNNNNNNNNN
chrom CTCTATGCAGAGTGTGTTTGTGTCTTCTCACTCATGGTTTTTAAATCTAATTG-----
right CTCTATGCAGAGTGTGTTTGTGTCTTCTCACTCATGGTTTTTAAATCTAATTG-----
      222222222222222222222222222222222222222222222222222222222222222222222
```

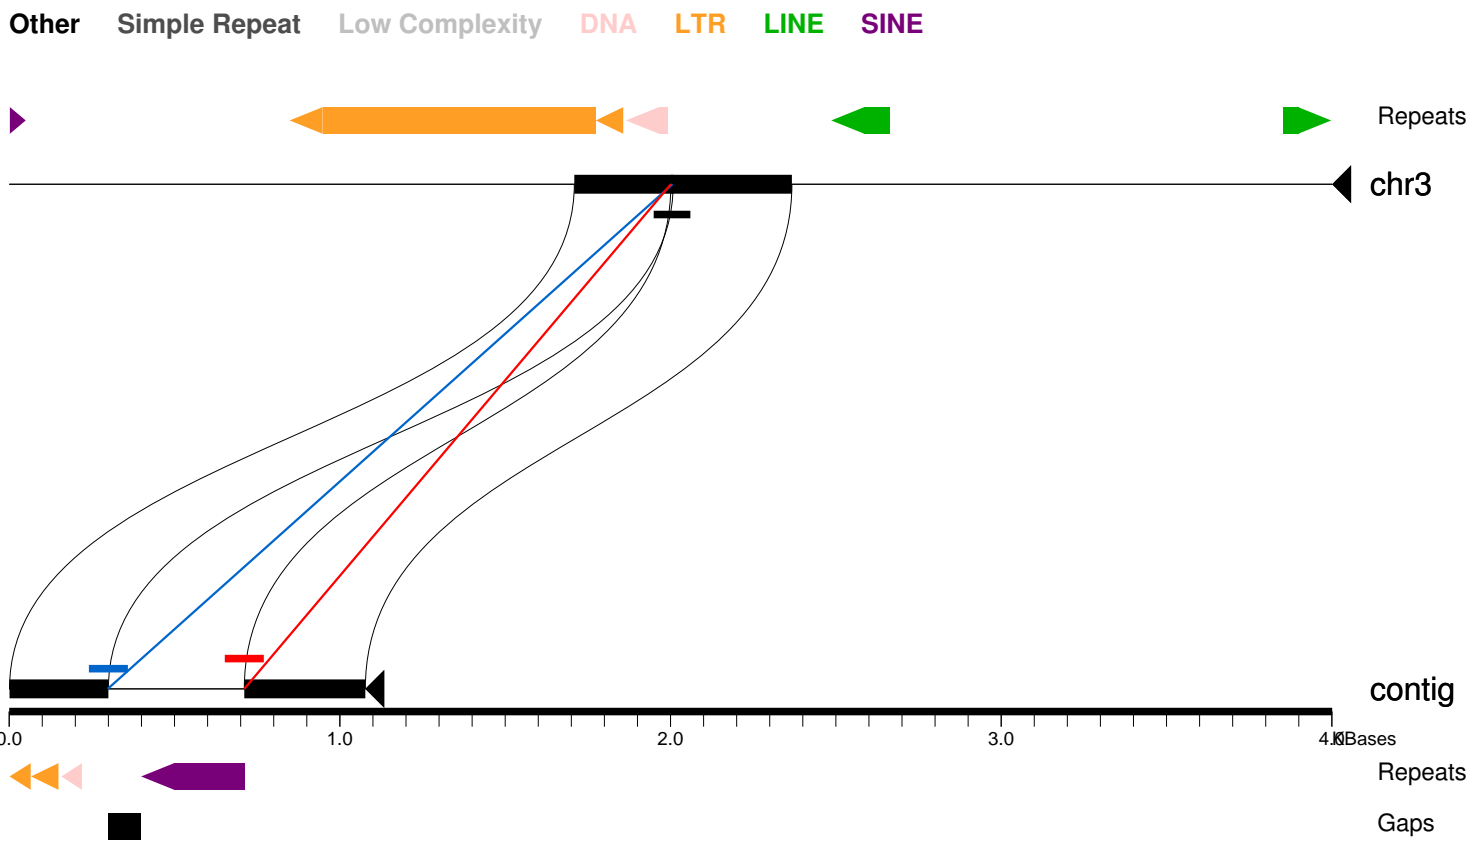



siteID: chr3\_169145007 Scaffitg1 - Breakpoint: chr3:169144988

chr3:169144941-169145044

Overlap Length: 13 INS size: 291 Genotyped: Yes

```
left   T-----ACTAATATGTAAACTTTTTAGTATTTCCA-ATTCATTTTTTAGTAAA---AATTATGA
chrom  T-----ACTAATATGTAAACTTTTTAGTATTTCCA-ATTCATTTTTTAGTAAA---AATTATGA
right  CGAGATCCCGCCACTGCACTCCAGCCTGGGCGACAGAGCGAGACTCCGACTCAAAAAAAAAAAATTATGA
        1111111111111111***1111*11*11**11111111*111*1*1*1**1111*11*11***111*****
```

```
left   TGTTTGGCCGGGCGCGGTGGCTCACGCCTGTAATCCCAGCACTTTGGGAGGCCGAGGCGGGCGG
chrom  TGTTTAA----ATGCATATATTATCATTTAAAGTCACAGAGCTATGCTAGTCT-----
right  TGTTTAA----ATGCATATATTATCATTTAAAGTCACAGAGCTATGCTAGTCT-----
        ***22222222**222222*22*222*22*2**2***22**2**22**2*222222222222
```

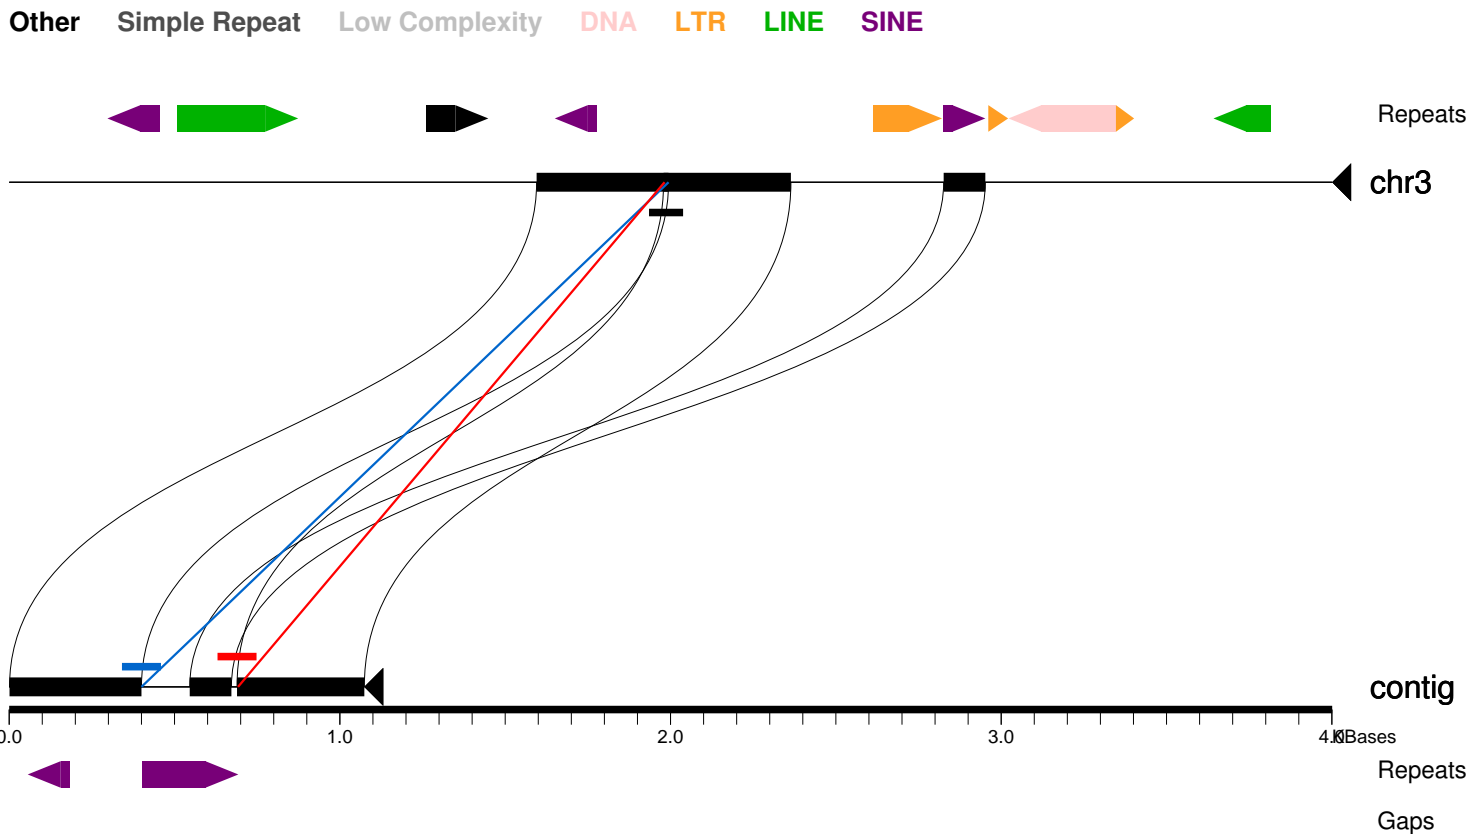

siteID: chr3\_169270584 Scaffitig5 - Breakpoint: chr3:169270590

chr3:169270541-169270649

Overlap Length: 11 INS size: 427 Genotyped: No

```
left      T-----GTTTGGCCACTTGAAGCTCTGTAAGACCAGTATT--TCCTTCTAGCCTG--CTCCTCCTGAT
chrom     T-----GTTTGGCCACTTGAAGCTCTGTAAGACCAGTATT--TCCTTCTAGCCTG--CTCCTCCTGAT
right    TCCACCCGCCTCGGCCTCCCAAAGTGCTGGGATTACAGGCGTGAGCCACCGCGCCCGGCCTCCTCCTGAT
          *111111*11*1*1*111111***11**11*111***111*111**11*11***1*11*****
left      NNNNNNNNNNNNNNNNNNNNNNNNNNNNNNNNNNNNNNNNNNNNNNNNNNNNNNNNNNNNNNNNNNNNN
chrom     TTTTAAAGTGAGGAAGTGGGGCGGTGCCATCCCTAAGTCCCAGTCACT-----
right    TTTTAAAGTGAGGAAGTGGGGCGGTGCCATCCCTAAGTCCCAGTCACT-----
          222222222222222222222222222222222222222222222222222222222222222222
```

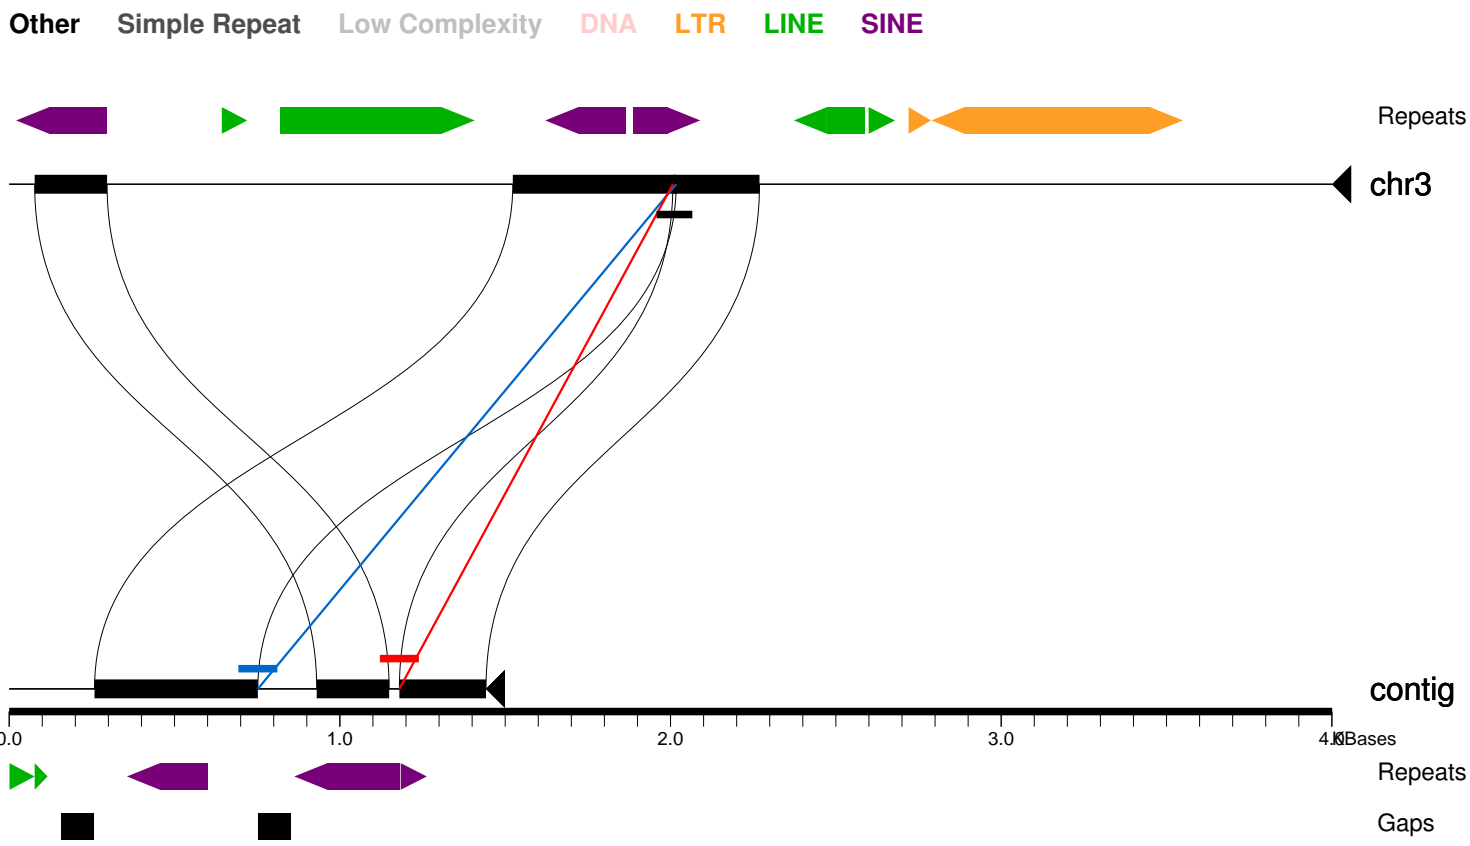

siteID: chr3\_169474327 Scaffitig4 - Breakpoint: chr3:169474313

chr3:169474264-169474372

Overlap Length: 11 INS size: 304 Genotyped: Yes

```
left  TGCTTCAA-----AAGGGGGTCAGAGAG-GA----TTCTGAGGAGGTGATATCTAAGTTAAGACTTGAG
chrom TGCTTCAA-----AAGGGGGTCAGAGAG-GA----TTCTGAGGAGGTGATATCTAAGTTAAGACTTGAG
right GTCCGCAGTCCGACCTGGGCGACAGAGCGAGACTCCATCTCAAAAAAAAAAAGAAAAAAAAA-AAGACTTGAG
      11*11**1111111111***1*1*****1*1**11111***1*11*1111*1*111**111*****
```

```
left  GCCGGGCGCGTTGGCTCACGCCTGTAATCCCA---GCACTTTGGGAGGCCGAGGCGGGTGGAT
chrom G--AGGAGAGAAGGG----GCCAGGAACTACAAGTGCAATTT---AAGCAGAGAACCCA----
right G--AGGAGAGAAGGG----GCCAGGAACTACAAGTGCAATTT---AAGCAGAGAACCCA----
      *222**2*2*22**22222***2*2**222**222***2***222*2**2***2222222222
```

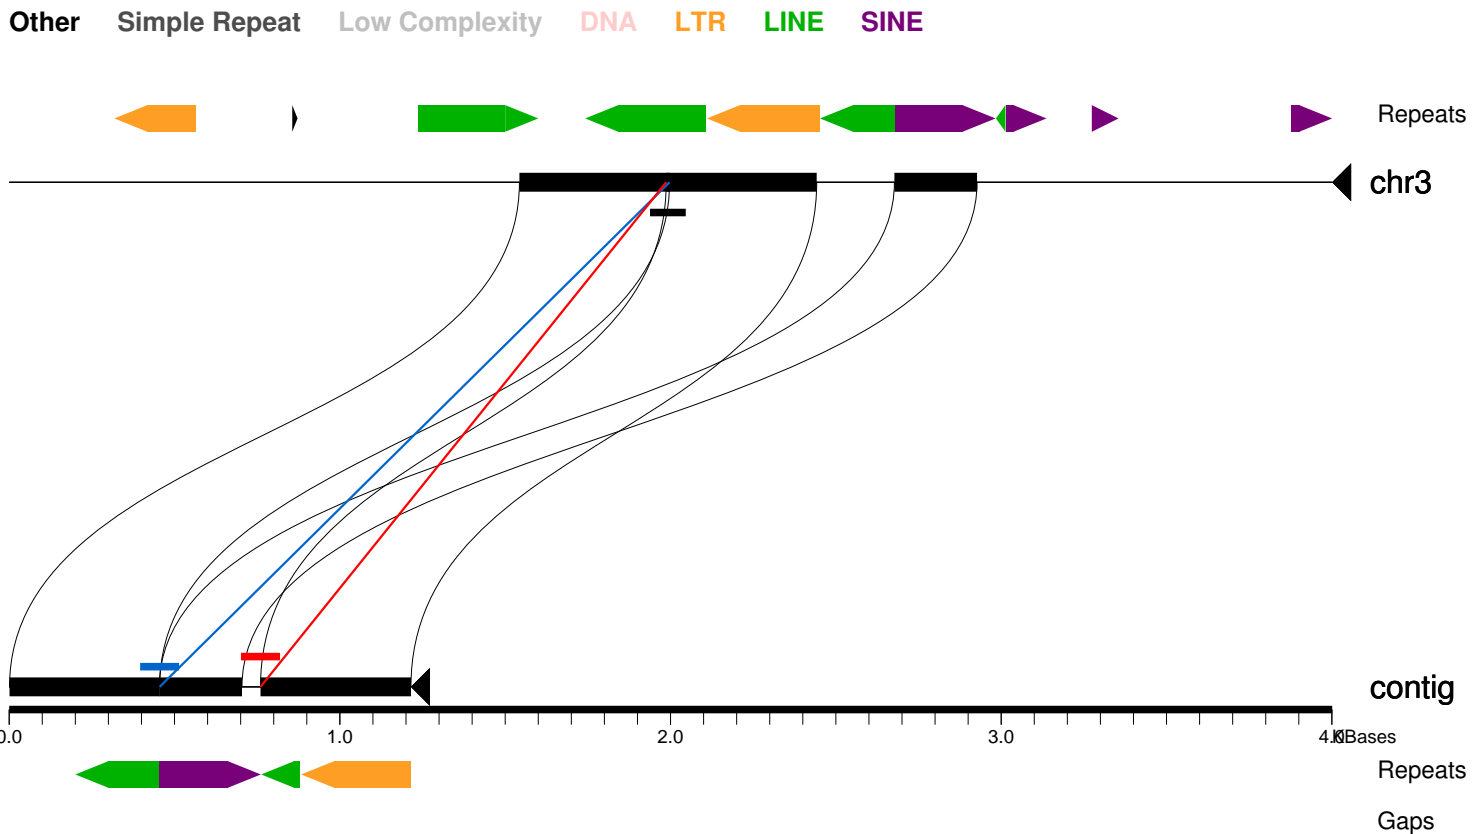



siteID: chr3\_170667528 Scafftig1 - Breakpoint: chr3:170667544

chr3:170667496-170667603

Overlap Length: 12 INS size: 412 Genotyped: No

```
left  ATGAGTGGCCCAGGGAAGCCAAAA-----GATTGACACCGCTGGTCTATAGTT-----TGCTTATAA  
chrom ATGAGTGGCCCAGGGAAGCCAAAA-----GATTGACACCGCTGGTCTATAGTT-----TGCTTATAA  
right CCGCCCGCCTC-GGCCTCCCAAAGTGCTGGGATT-ACAGGCGTGAGCCACCGCGCCCGGCC*TGCTTATAA  
11*1111*1*1*1**1111*****11111111****1***1111**11*1*11*1111111111*****
```

```
left  TAGNNNNNNNNNNNNNNNNNNNNNNNNNNNNNNNNNNNNNNNNNNNNNNNNNNNNNNNNNNNNNNNNNNNN  
chrom TAGCTTTATCTGGTTTGTATGTCAGGGTAATGCTAGCTTCATAGAATGAATT-----  
right TAGCTTTATCTGGTTTGTATGTCAGGGTAATGCTAGCTTCATAGAATGAATT-----  
***22222222222222222222222222222222222222222222222222222222222222222222
```

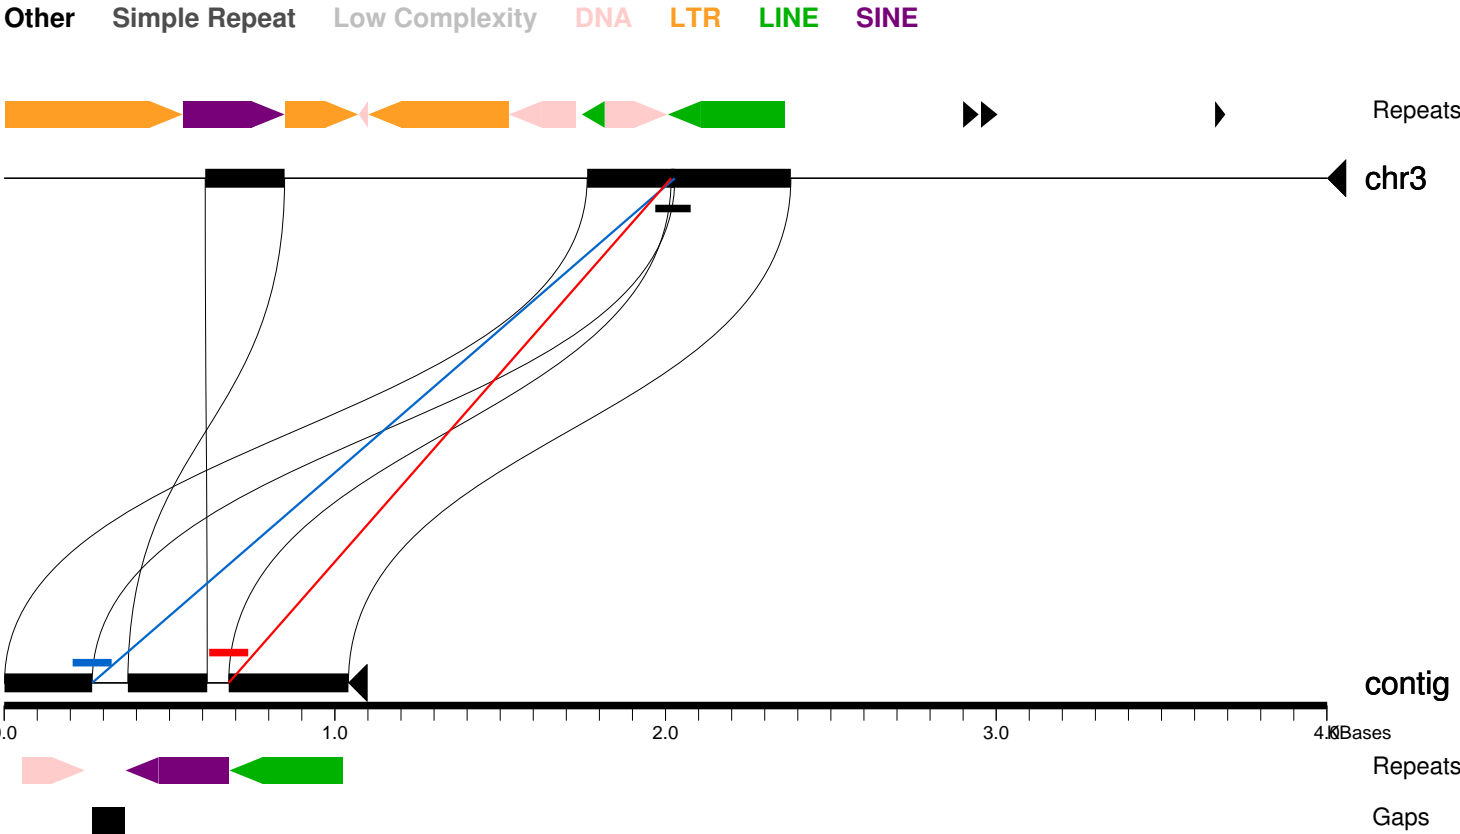

siteID: chr3\_171319267 Scafftig2 - Breakpoint: chr3:171319286

chr3:171319241-171319345

Overlap Length: 15 INS size: 294 Genotyped: Yes

```
left  C-----ATTTTA--CCATCTTTAGC--CATATGAAAAATAAGTT-----ATTTACTTATAAAAAACATTCA
chrom C-----ATTTTA--CCATCTTTAGC--CATATGAAAAATAAGTT-----ATTTACTTATAAAAAACATTCA
right CCCGCCACTGCACTCCAGCCTGGGCGACAGAGCGAGACTCCGTCTCAAAAAAAAAAAAAAAAAAAAAAAACATTCA
      *11111*1*11*11***1*1*11**11**1*111*1*1*11**111111*111*111*1*****
```

```
left  TTTTGGCCGGGCGGGTGGCTCACGCCTGTAATCCCAGCAC-TTTGGGAGGCCGAGGCGGGCGG
chrom TTTTATTA-----TTGGTTACA----AAATCTCACCTTATTTGTGAA----ATGTTCCCTA
right TTTTATTA-----TTGGTTACA----AAATCTCACCTTATTTGTGAA----ATGTTCCCTA
      ***222222222222*2*2*2**222222*****2**2*222*****2**22222*2*2222*22
```

Other Simple Repeat Low Complexity DNA LTR LINE SINE

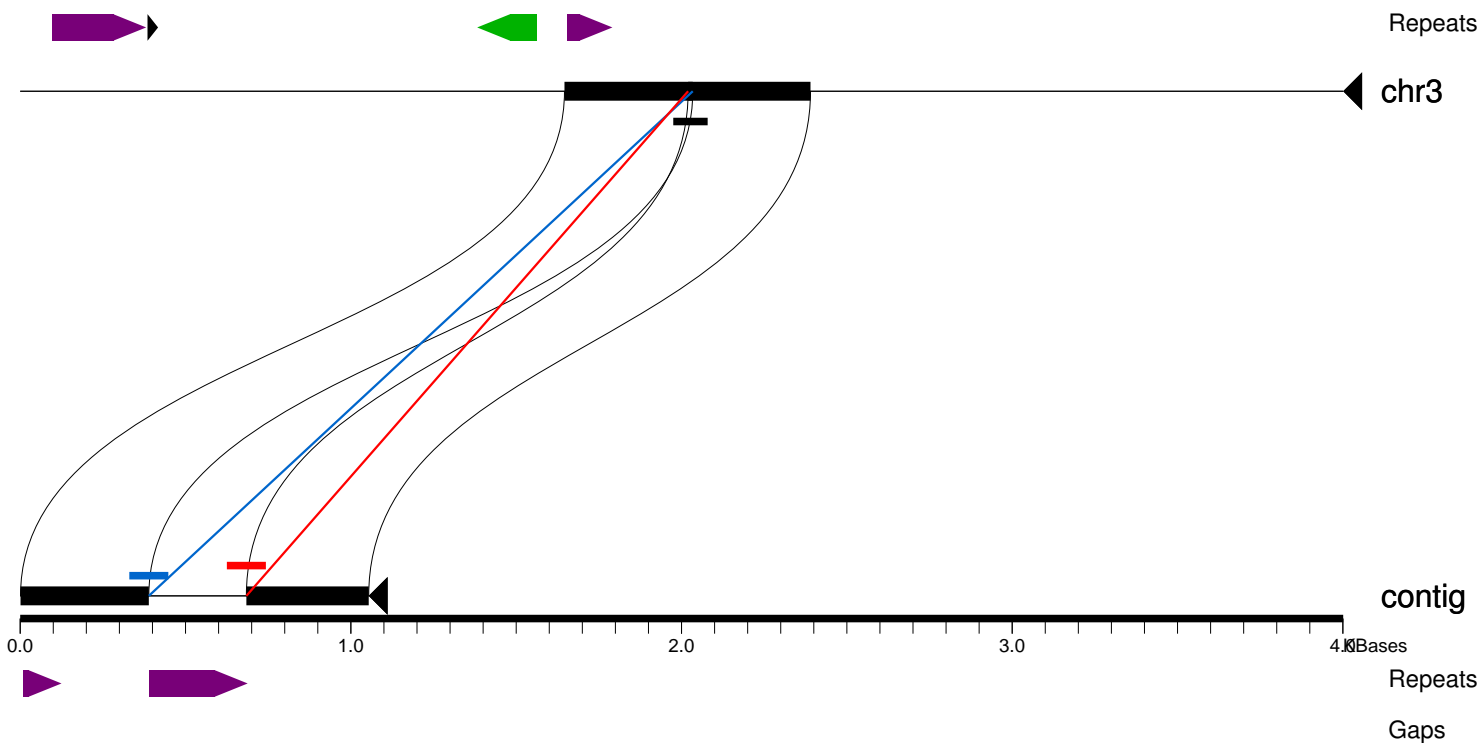

**siteID: chr3\_171626378 Scafftig2 + Breakpoint: chr3:171626374**  
**chr3:171626329-171626433**  
**Overlap Length: 8 INS size: 305 Genotyped: Yes**

```

left  TT-----ATTACAGTATATTGTTATTATT--CTATTTTCATTATTAAGTTATTCCTGTTAATTT
chrom TT-----ATTACAGTATATTGTTATTATT--CTATTTTCATTATTAAGTTATTCCTGTTAATT
right CCGCCCCGCTCGGCCTCCCAAAGTGCTGGGATTACAGGCGTGAGCCACCGCGCCCGGCCCTCCTGTTAATT
      111111111111111111*11**111*11**11****1111*1111111*1111111111111******2**

left  TTTTTTTTTTTTTTTTTTTTTTGGAGACGGAGTCTCGCTCTGTCGCCAGGCTGGAGTGCAGTGGCG
chrom TCTTACTATGTCTAATTTATAAAA-----TTAAACTTTCTCATAGGT----GTGTA-TGT--
right TCTTACTATGTCTAATTTATAAAA-----TTAAACTTTCTCATAGGT----GTGTA-TGT--
      *2**22*2*2*2*22**22*2*2222222*2222**2**2*22***22222**2*2**222
  
```

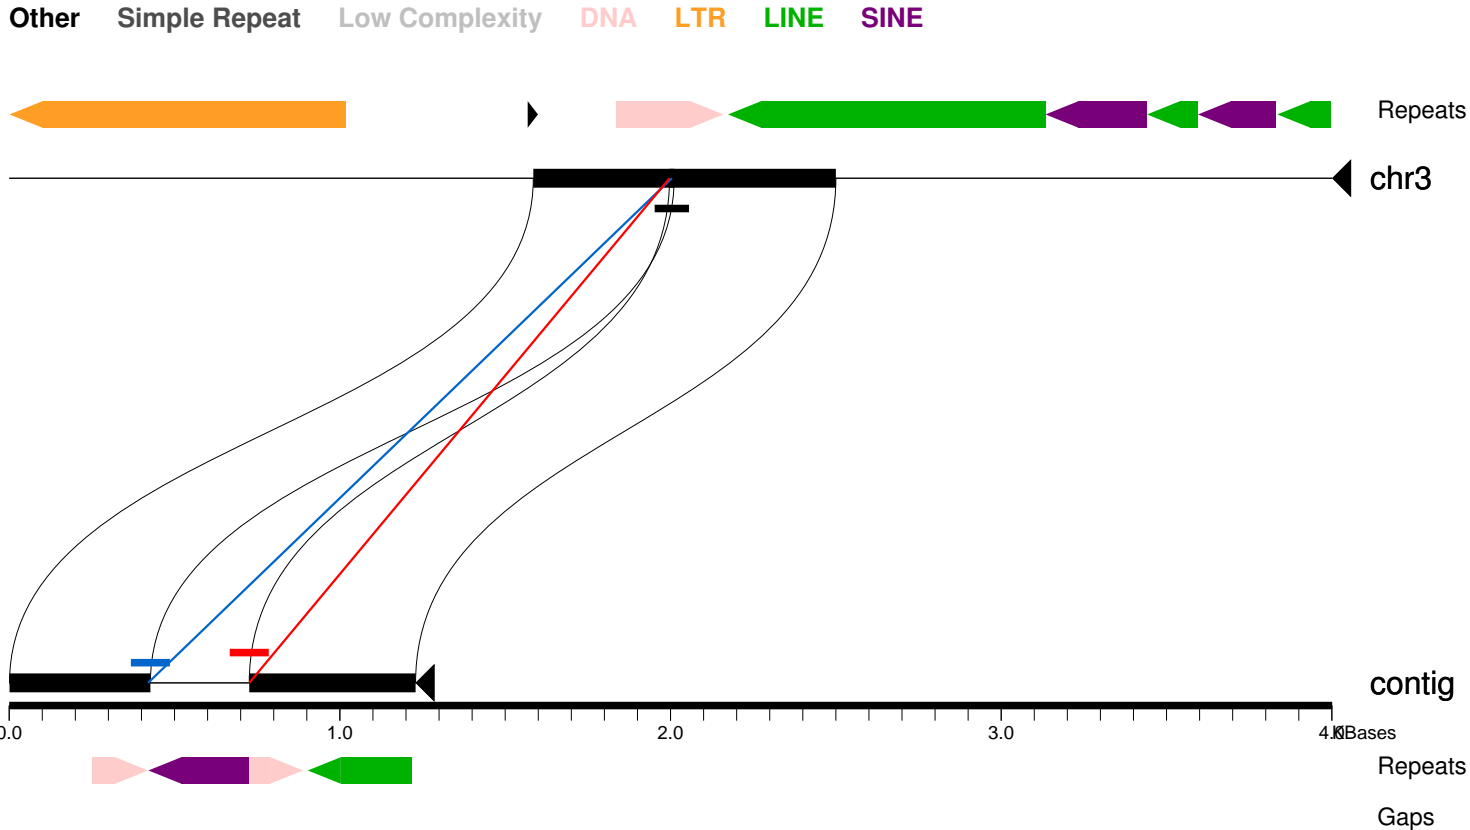

siteID: chr3\_171883793 Scafftig2 + Breakpoint: chr3:171883794

chr3:171883749-171883853

Overlap Length: 15 INS size: 301 Genotyped: Yes

```
left  ATGG---TTG--CTTTTATTCTTTTGAGAATA-----TTTGTTCCTAG---GTGAATGAGAGCTAATC
chrom ATGG---TTG--CTTTTATTCTTTTGAGAATA-----TTTGTTCCTAG---GTGAATGAGAGCTAATC
right ACCCGCCTCGGCCTCCCAAAGTGCTGGGATTACAGGCGTGAGCCACCGCGCCCAGGCAAAGAGAGCTAATC
      *1111111*1*11**111*111*11**1**1**1111111*11*111**11*111*111*1*****
```

```
left  TTTTTCCTTTTTTTTTTTTTTTTGGAGACGGAGTCTCGCTCTGTCGCCAGGCTGGAGTGCAG-TG
chrom TTTTAT-----GCATGA-AGGGCCTAAAGTGCTCTGATTTATATT--AATAAATATA
right TTTTAT-----GCATGA-AGGGCCTAAAGTGCTCTGATTTATATT--AATAAATATA
      ***2*2222222222222222222***2*2**22*222*22**2*22222*222*22*2*22*2
```

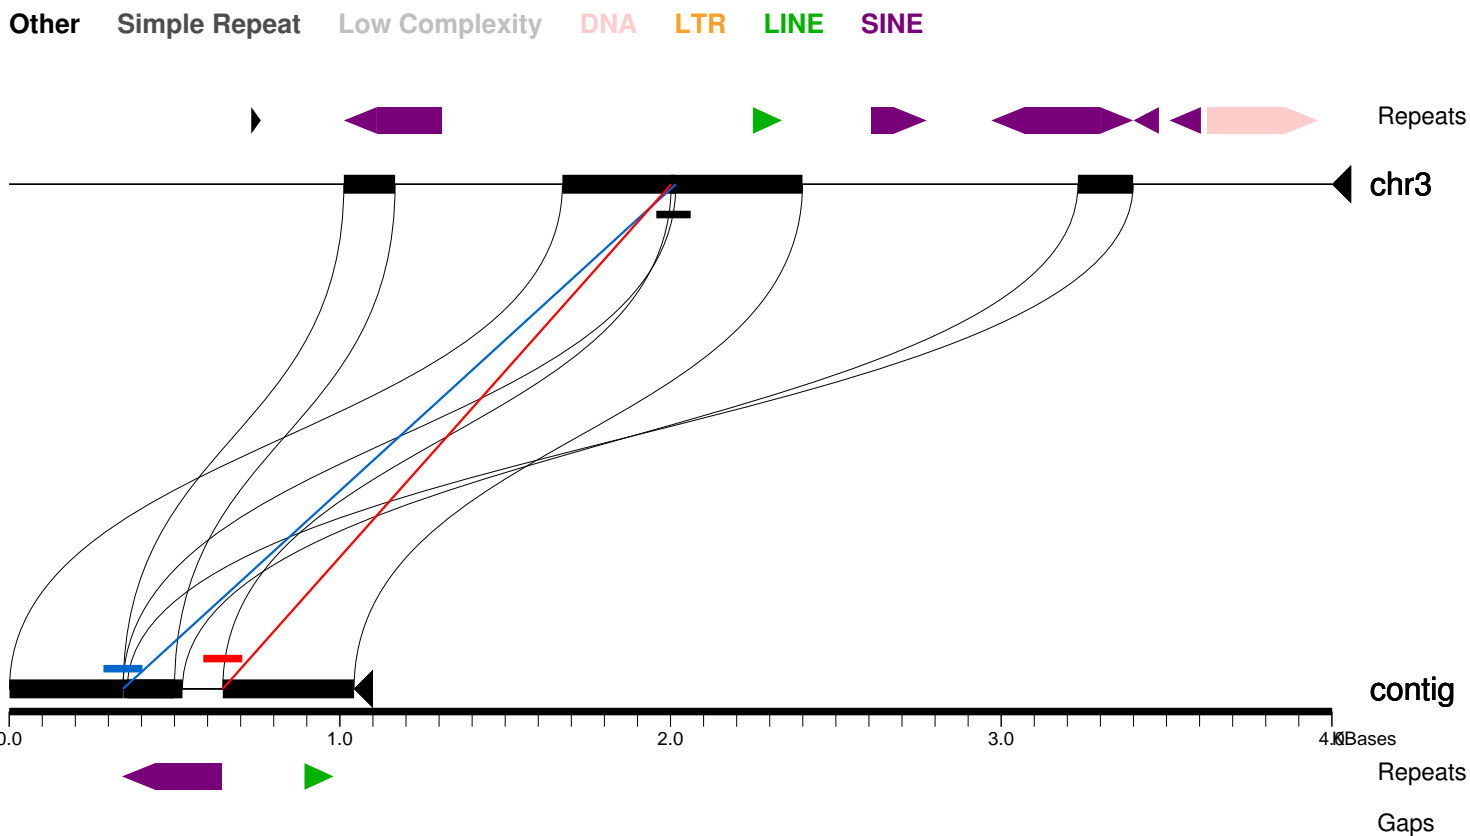

siteID: chr3\_172322862 Scafftig2 - Breakpoint: chr3:172322937

chr3:172322891-172322996

Overlap Length: 14 INS size: 141 Genotyped: Yes

```
left  T--GCAGACCACA----CTGACCACAGTGTGCATAAGCAATT-----GCTTTCAGTTGAGTTT
chrom T--GCAGACCACA----CTGACCACAGTGTGCACAAGCAATT-----GCTTTCAGTTGAGTTT
right TCGGCTCACTGCAAGCTCCGCCTCCAGGTTTAC--GCCATTCTCCTGCCTCAGCCTCCCA--TGAGTTT
      *11*11*11*11*1111*1*1*11*111*1**211*1***111111111111*1*1***11*****
left  AACTTTTFFFFFFFFFFFFFFFFFFFFFFFFFFFFFFFFFFFFFFFFGGAGACGGAGTCTCGCTCTGTCGCCCA
chrom AACTTTTAAATTCCAATATGGCCTCTCTGGTTTCTCCTCT-----GATCTGTGCTGGGT-----
right AACTTTTAAATTCCAATATGGCCTCTCTGGTTTCTCCTCT-----GATCTGTGCTGGGT-----
      *****22**2222*2*2222*2*2*22***2*22*2*2222222**22222**22**222222
```

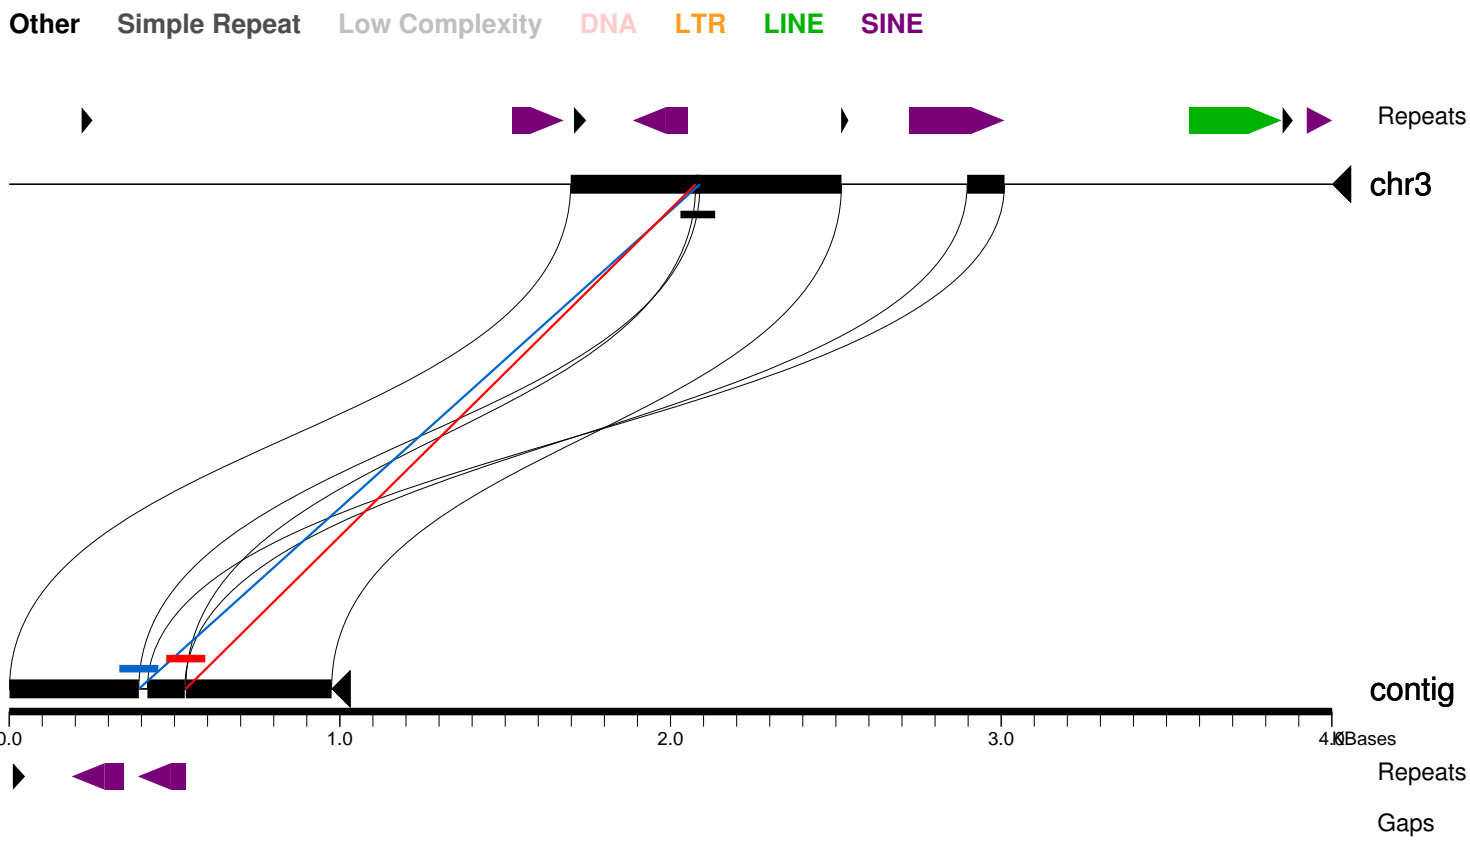

siteID: chr3\_174250916 Scafftig2 - Breakpoint: chr3:174250897

chr3:174250852-174250956

Overlap Length: 15 INS size: 321 Genotyped: Yes

```
left CCTT-ACCCTTTCCTCTCCACTTTCTTTTACGTGCCACCTTATCT-----AAAAAAGCAA
chrom CCTT-ACCCTTTCCTCTCCACTTTCTTTTACGTGCCACCTTATCT-----A AAAAAAGCAA
right AGAGCAAAACTCCGTCTCAAAAAAAAAAAAAAAAAAAAAAAAAAAAAAAAAAAAAAAAAA AAAAAAGCAA
      11111*11111*1*1****1*1111111111*11111111*1111*1111111111111111******
```

  

```
left ATGTG--GCCGGGCGCGGTGGCTCACGCCTGTAAT-CCCAGCACTTTGGGAGGCCGAGACGGGCGG
chrom ATGTTTAGCCAACCGGGATTAGTTTAGGTTGTATGACCCAAC-----CCCAGCC-----
right ATGTTTAGCCAACCGGGATTAGTTTAGGTTGTATGACCCAAC-----CCCAGCC-----
      ***222***222**2*2*222*222*22****222****2*2222222222**2**2*222222
```

Other Simple Repeat Low Complexity DNA LTR LINE SINE

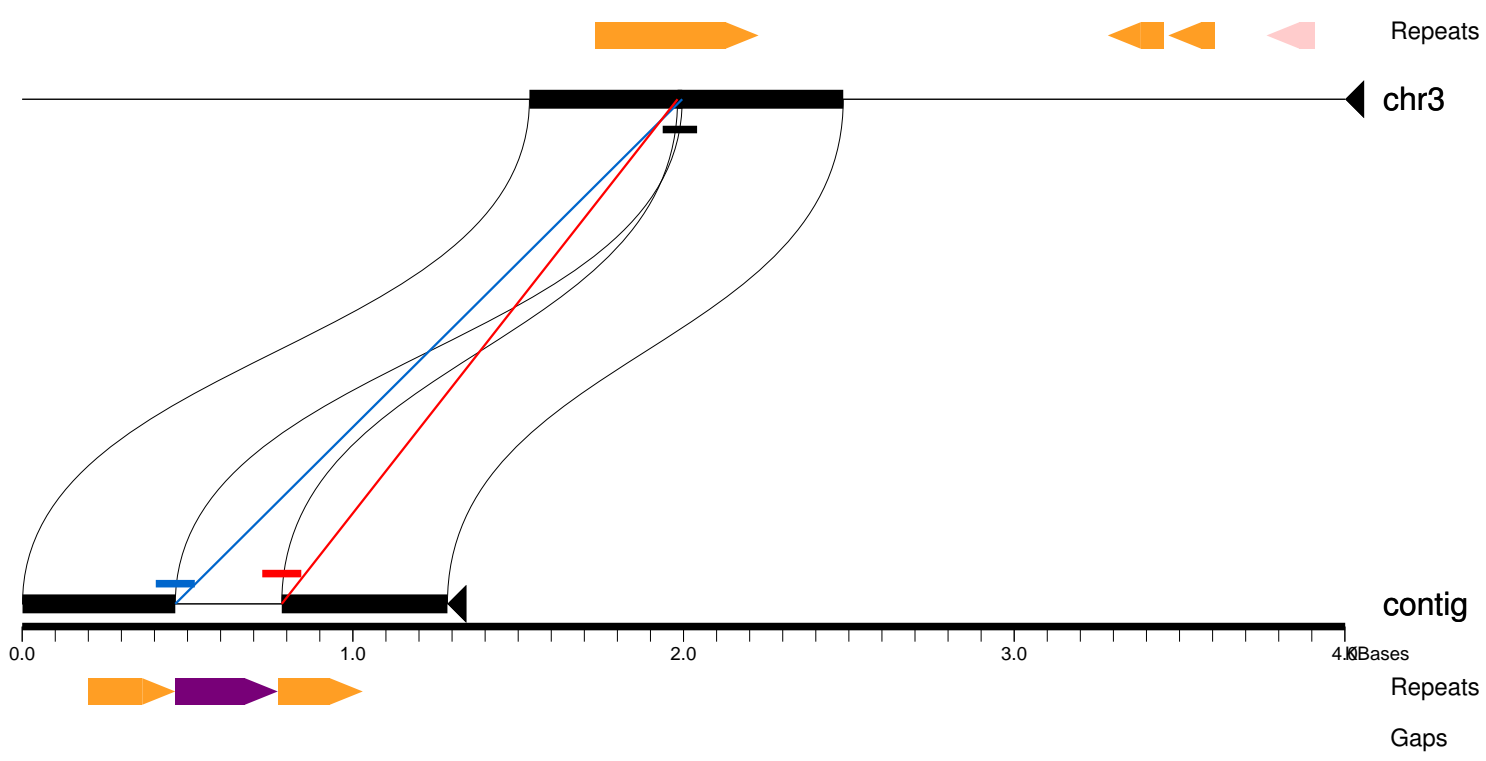

siteID: chr3\_174410759 Scafftig7 + Breakpoint: chr3:174410737

chr3:174410691-174410796

Overlap Length: 14 INS size: 309 Genotyped: Yes

```
left  ATAAAAATTATTGGTAT---AAAAGGTTCTATTTGTAGG---GACCCATATGA-----ACTCATAACCTT
chrom ATAAAAATTATTGGTAT---AAAAGGTTCTATTTGTAGG---GACCCATATGA-----ACTCATAACCTT
right CCACCCGCCTCGGCCTCCCAAAGTGCTGGGATTACAGGCGTGAGCCACCGCGCCCGGCCACTCATAACCTT
      11*1111111*1**11*111***11*1*1111**11***111**1***1111111111111*****
```

```
left  TCTCTTTTTTTTTTTTTTTTTTTTTTTTGGAGACGGAGTCTCGCTCTGTGCGCCAGGTCGGACTGCG
chrom TCT-----TGAGATTCAACATACAGAATATAAATA--CCAACCAGTAAAAATAATAA
right TCT-----TGAGATTCAACATACAGAATATAAATA--CCAACCAGTAAAAATAATAA
      **222222222222*2222**2222*2**2**2*2*222*2222*22***222222222222
```

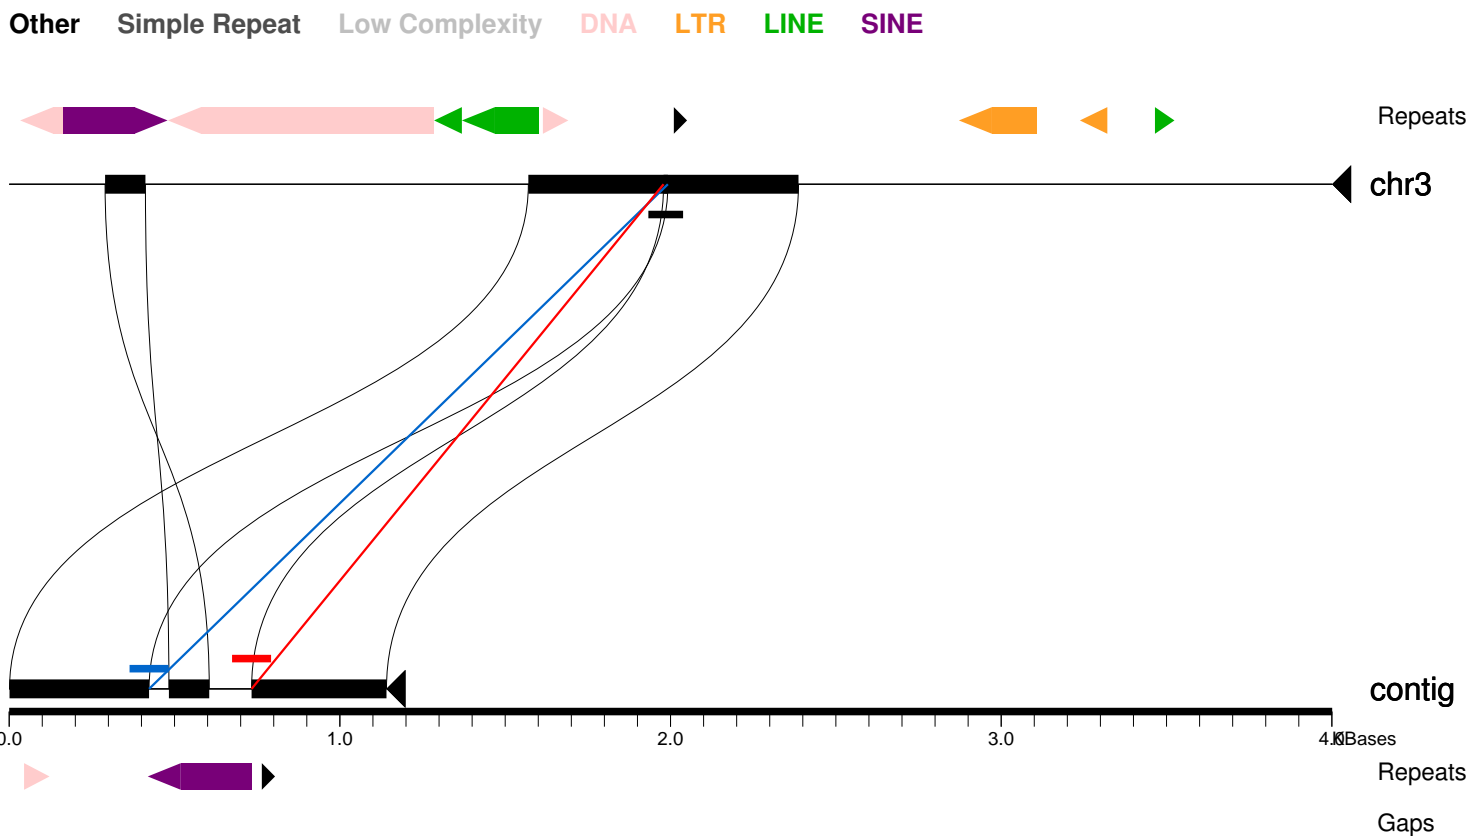

siteID: chr3\_175673955 Scafftig3 + Breakpoint: chr3:175673930

chr3:175673884-175673989

Overlap Length: 14 INS size: 308 Genotyped: Yes

```
left  -----GAAT-GAAATGCAAAATATTAGAAAGTTCA-----AATAAAGGGGATAAGGTCTAATTTGTGA
chrom -----GAAT-GAAATGCAAAATATTAGAAAGTTCA-----AATAAAGGGGATAAGGTCTAATTTGTGA
right CCGCCCGCCTCGGCCTCCCAAAGTGCTGGGATTACAGGCGTGAGCCACCGCGCCCGGCCCTAATTTGTGA
      111111*11*1*111*1*1***11111*11*1*1**111111*111*11*1*1111*11*****
```

```
left  TTTTTTTTTTTTTTTTTTTTTTTTTTTTTTTTTTGGAGACGGAGTCTCACTCTGTGCGCCAGGCTGG
chrom TTTAAAAGGCATATTCTCTCTGCTGTGTAT-AGATGA-----TAGGTGTGAAAAG
right TTTAAAAGGCATATTCTCTCTGCTGTGTAT-AGATGA-----TAGGTGTGAAAAG
      **22222222*2**2*2*2*22*2*2*2*2***2*2222222222222*2*2222*2222*
```

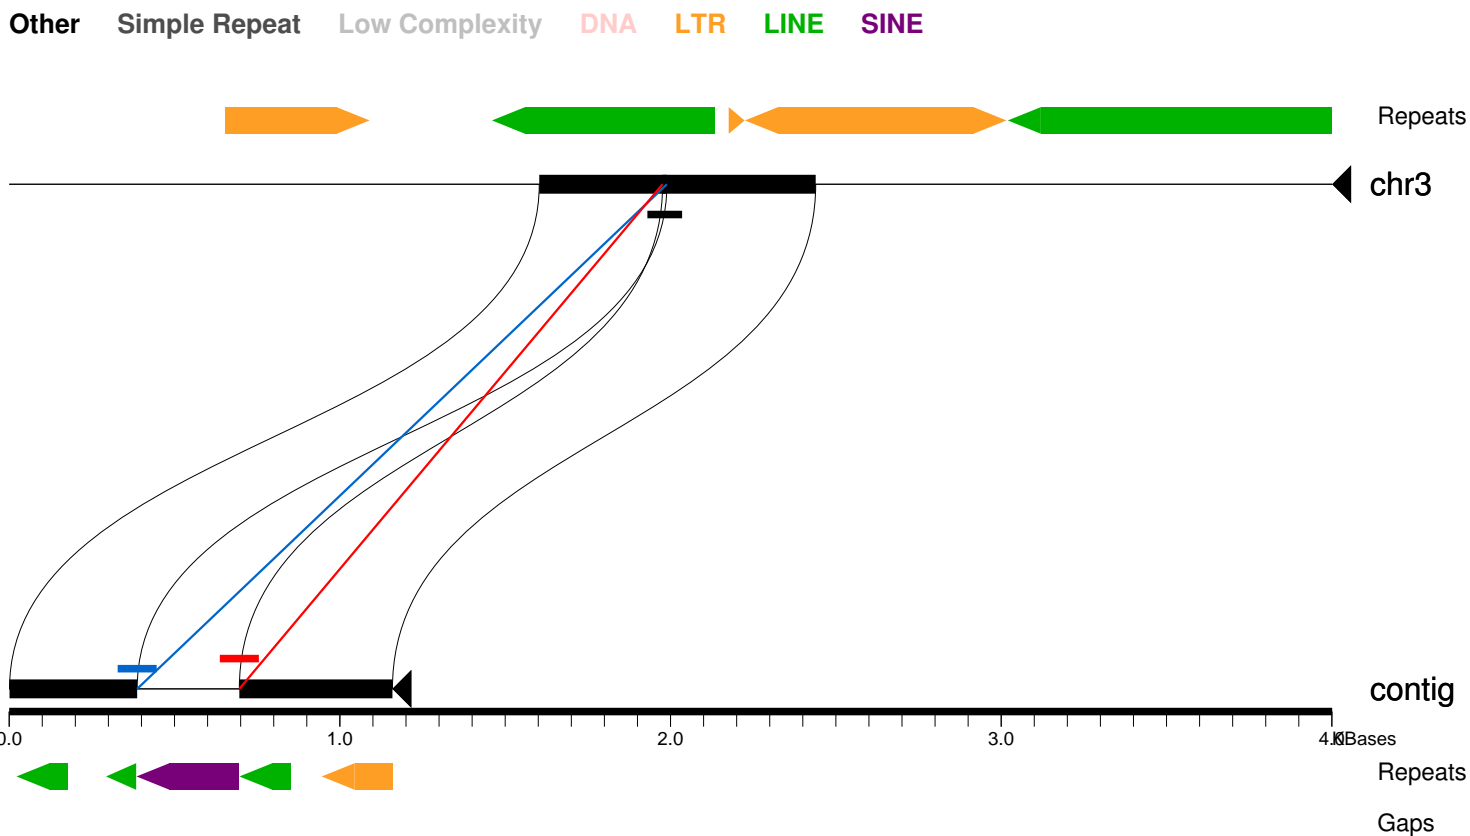





siteID: chr3\_178111052 Scaffitg3 - Breakpoint: chr3:178111037

chr3:178110986-178111096

Overlap Length: 9 INS size: 322 Genotyped: Yes

```
left  GCTGATA-----TCAGTGTACATCAATCCAAAAATATGCTGTGGTAGATTTTTGCTTAAAAATGGGG
chrom GCTGATA-----TCAGTGTACATCAATCCAAAAATATGCTGTGGTAGATTTTTGCTTAAAAATGGCA
right GGCGACAGAGCGAGACTCCGTCTCAAAAAAATAAAAAAATAAAAAAATAAAAAAATAAAAAAATAAAAAA
*11**1*1111111111**1**1*11*11**111****1**1111111**1*1111111111*****2
```

```
left  CCGGGCGCGGTGGCTCACGCCTGTAATCCCAGCACTTTGGGAGGCCGAGGCGGGTGGA
chrom AGAAGTAGATTTTCGGCAGGCC---AATGCT-GCCCCTGAGAATAAAAAAGA----AAAA
right AGAAGTAGATTTTCGGCAGGCC---AATGCT-GCCCCTGAGAATAAAAAAGA----AAAA
2222*22222*2222**2***222***2*22**2*2*22*2*22222**22222222*
```

Other Simple Repeat Low Complexity DNA LTR LINE SINE

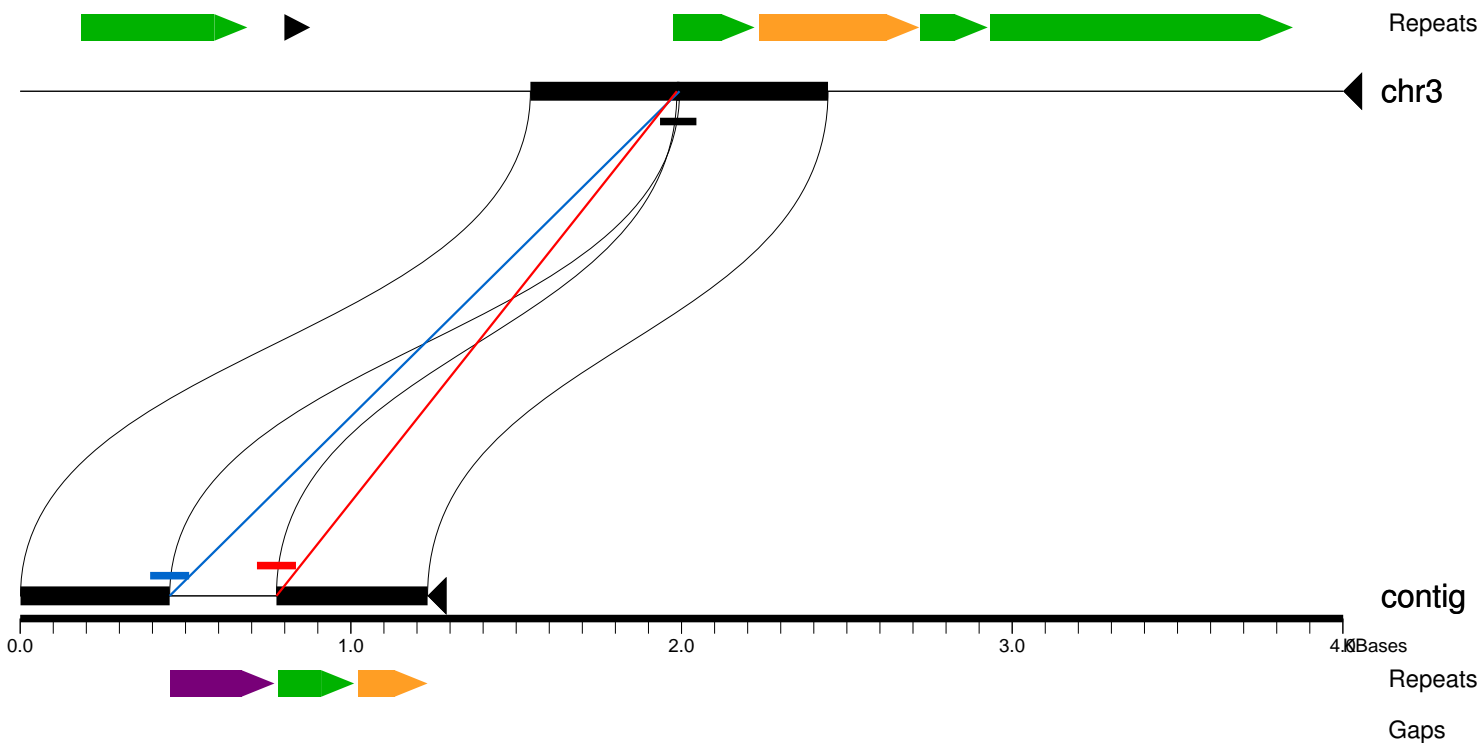

siteID: chr3\_182299005 Scaffoldig4 - Breakpoint: chr3:182298997

chr3:182298954-182299056

Overlap Length: 17 INS size: 305 Genotyped: Yes

```

left    AA-ATTCG--CCTGT--GATTATTTAAGAT--CATCTCCTTGTTCTTTGG-----AAATATATAAC
chrom   AA-ATTGC--CCTGT--GATTATTTAAGAT--CATCTCCTTGTTCTTTGG-----AAATATATAAC
right   TGCAGTCCAGCCTGGGCGACAGAGCGAGACTCCGTCTCAAAAAAAAAAAAAAAAAAAAAAAAAAATATATAAC
        111*1*1*11****111**1111111**111*1****11111111111111111111******

```

```

left    TATGTAAGAGGCCGGGCGGGTGGCTCACGCCTGTAGTCCCAGCACTTTGGGAGGCCGAGGCGGGC
chrom   TATGTAATCAAGCATGCTTCGGAGAAAAAGTATATAC-----CTTT---ATGTAAAAAT-----
right   TATGTAATCAAGCATGCTTCGGAGAAAAAGTATATAC-----CTTT---ATGTAAAAAT-----
        *****22222*22**222*22*222*2*22*2**222222222*****222*2*222*2222222

```

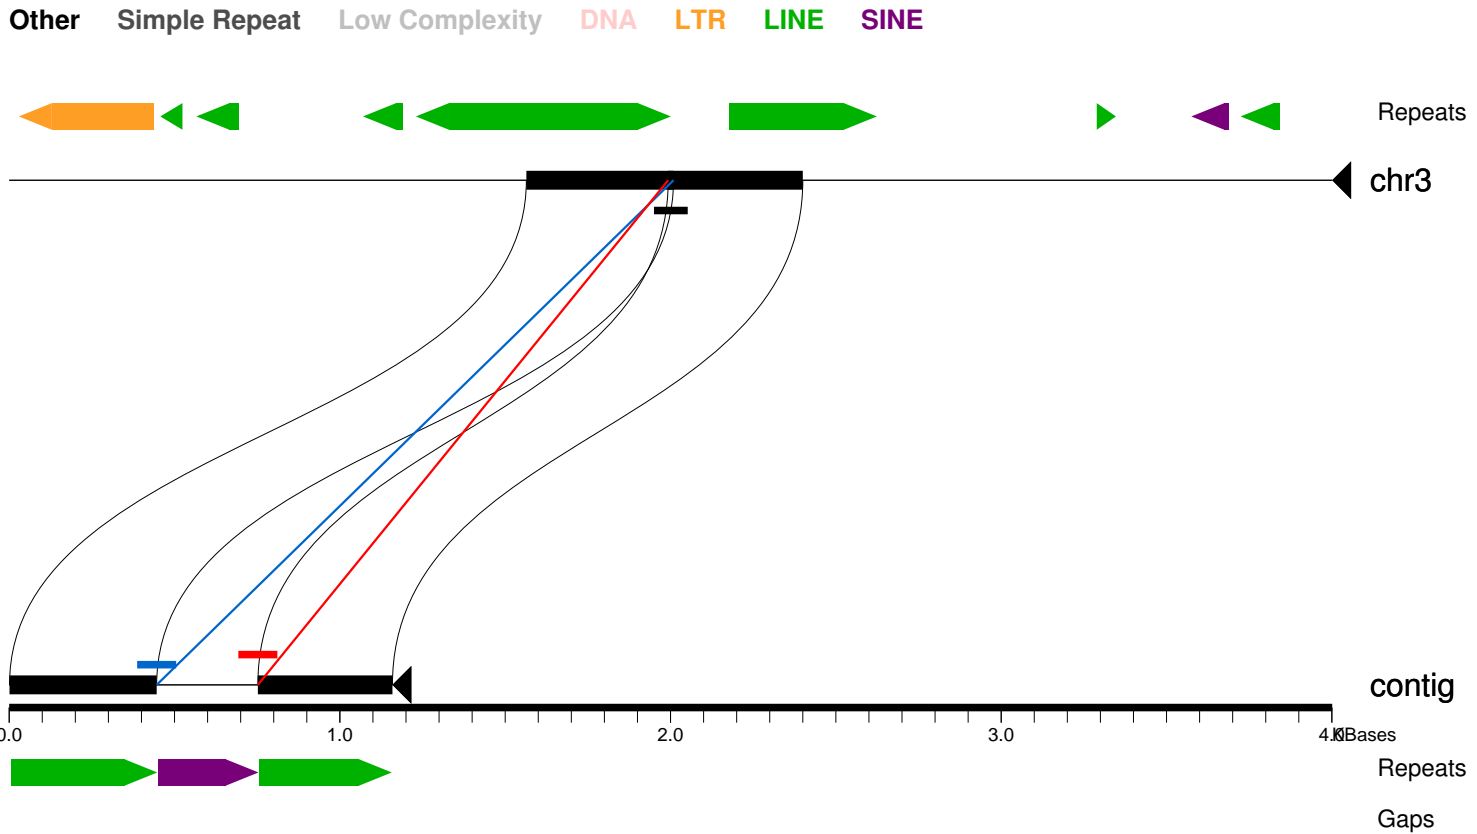



siteID: chr3\_188883226 Scafftig4 + Breakpoint: chr3:188883212

chr3:188883052-188883386

Overlap Length: 15 INS size: 307 Genotyped: Yes

```
left -----GTGTTCCAGACACACAGGTTTTACTGCTGTTTCCTTACAGCAAGACTGATTACCCCTAC
chrom CCTGCCGCCAGTGTTCAGACACACAGGTTTTACTGCTGTTTCCTTACAGCAAGACTGATTACCCCTAC
right TTT-----AGT-----AGAGACGG-GTTTTACCT-TGTT-----AGCCAGGATGGT-----C
NN2      2**111111***1**111*****1**111***1111111***1**11**1*11111111*
```

```
left AGGTTCTTGCCCTGAGCTTTTGTACAGTCTATTCTGGGTTGGAGTTTTCTAAATGACTGTCACGATAGA
chrom AGGTTCTTGCCCTGAGCTTTTGTACAGTCTATTCTGGGTTGGAGTTTTCTAAATGACTGTCACGATAGA
right TCGATCT----CCTGACCTCATGA----TCCACCC-GCCTCGGCCTC--CCAAAGTGCTGGGATTACAGG
11*1***1111*****1**11**111111**1*11*1*11*1**11*1111*1***111***11*11*1**1
```

```
left TG-GAGAAACTGTAACACTCTGGTTCTCAAACCTTTT-----TTF-----TTFTTGA
chrom TG-GAGAAACTGTAACACTCTGGTTCTCAAACCTTTTATGTGCATAACAGCCATCTGGCAAGGCTTGTGA
right CGTGAGCCACCGCGCCCGCCGGTTCCTCAAACCTTTTATGTGCATAACAGCCATCTGGCAAGGCTTGTGA
1*1***11**1*111*111*1*****2*2*222*2222222*2*2222222*2*****
```

```
left GACGGAG---TCTCGCTCTGTCGCCAGG-----CCGG--ACT---GCGGACTGCAGTGGCGCAAT
chrom CATGGAGATTTCTAGGCCTA-CCCCCAGAGATTCTAATCCAGTAAATCAAGGGGCCTGGGCATGTGCATT
right CATGGAGATTTCTAGGCCTA-CCCCCAGAGATTCTAATCCAGTAAATCAAGGGGCCTGGGCATGTGCATT
2*2****222***2*22**22*2*****222222222**2*22*2*222*2**2***22222*2***2*
```

```
left CTC-----GGCTCACTGCAAGCT---CCGCTTCCCGGG--TTCACGCCATTCT--
chrom TTTAATATGAGGTTCTCAGGCAGGTGTCAGGGACCTGCGCATCAAATGCTGTCTTC
right TTTAATATGAGGTTCTCAGGCAGGTGTCAGGGACCTGCGCA-----
2*22222222*2*2*2*2*22*2*22*2*22*2*221NN1NNN1NN111
```

Other Simple Repeat Low Complexity DNA LTR LINE SINE

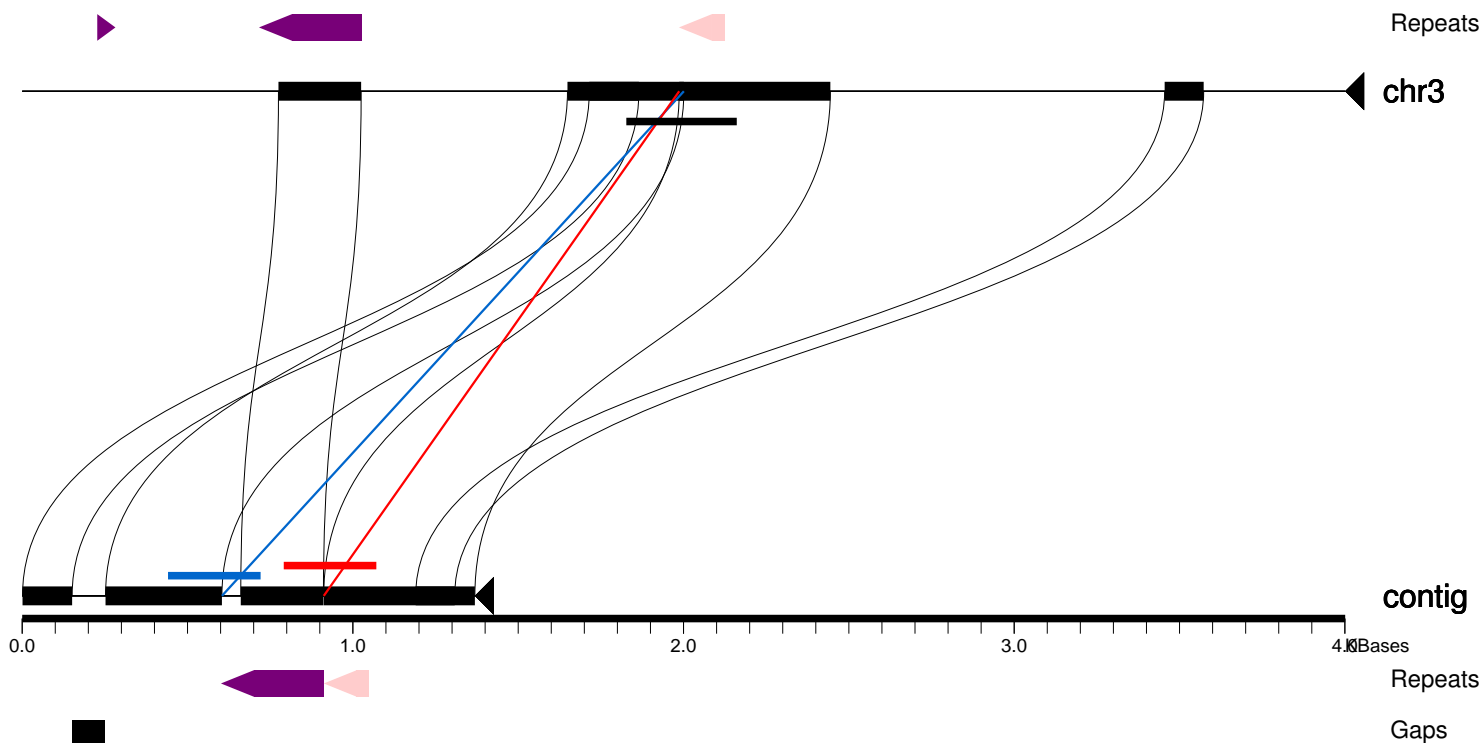



siteID: chr3\_190999466 Scafftig6 + Breakpoint: chr3:190999451

chr3:190999374-190999510

Overlap Length: 14 INS size: 310 Genotyped: Yes

```
left CTATGATTTCCCCCAATGCTTTACTTTTCCTCAAATCTCTGCAAATACAAGTTTCTATCTTCTTGATGTAT
chrom CTATGATTTCCCCCAATGCTTTACTTTTCCTCAAATCTCTGCAAATACAAGTTTCTATCT---TGATGTAT
right C-----CGCCC---GCCTCGGCCTCC-CAAAGTGCTGGGATTACAGG-----CG---TGAGCCAC
      *111111111*1***111*1*11111***1****111***11*1***1*1111111*1222***111*1
```

```
left TTTTCATTGT-TGTACTCTATTTTCATTTT-----CTTTTTTTTTTTTTTTT-----TTTTT
chrom TTTTCATTGT-TGTACTCTATTTTCCATAAAGAACTTACTAATAGTCTTGTAAGATGAAAATCTCCTTTTC
right CGCGCCCGGCCCTGTACTCTATTTTCCATAAAGAACTTACTAATAGTCTTGTAAGATGAAAATCTCCTTTTC
      1111*111*11******2*222222***22*22*22*2*2222222222222222***2
```

```
left T
chrom C
right C
      2
```

Other Simple Repeat Low Complexity DNA LTR LINE SINE

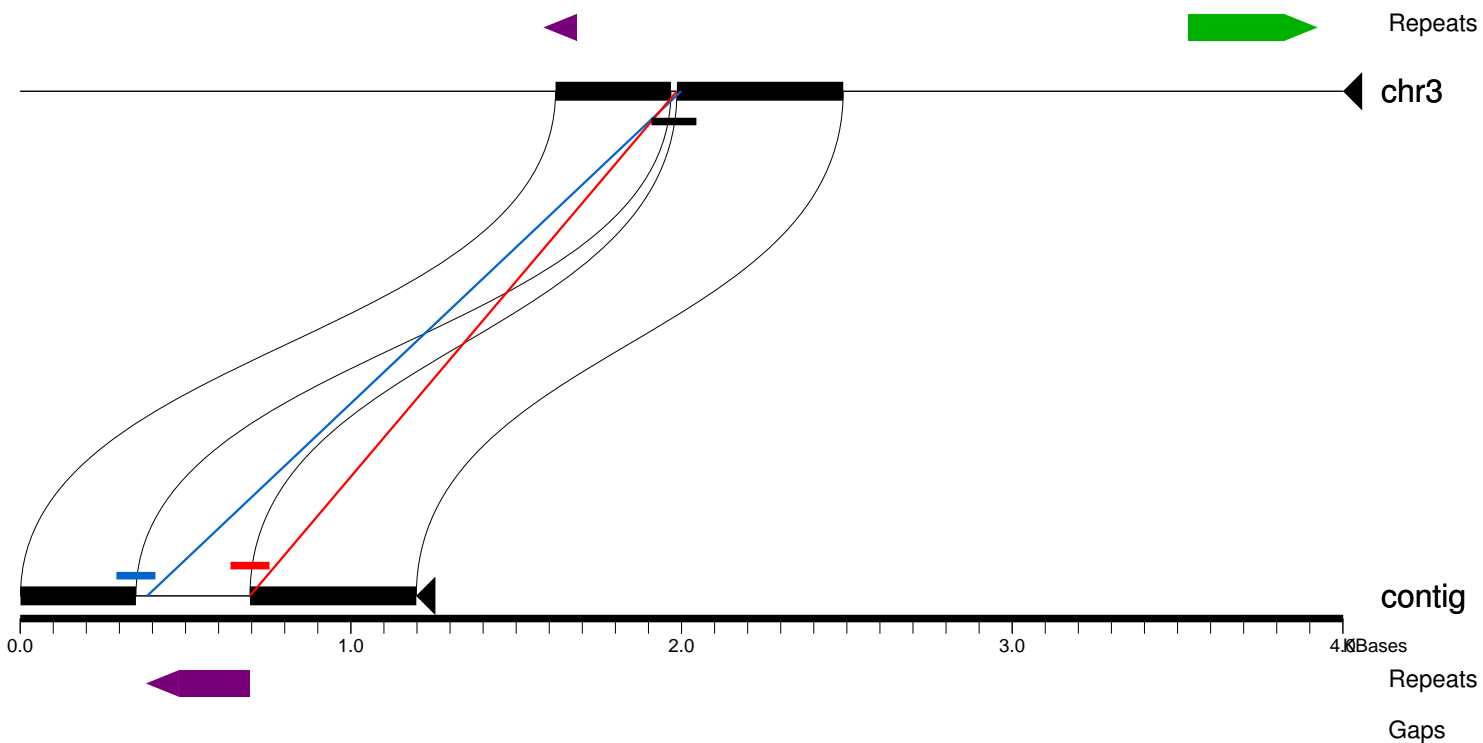

siteID: chr3\_21577503 Scaffitig1 - Breakpoint: chr3:21577519

chr3:21577476-21577578

Overlap Length: 17 INS size: 116 Genotyped: Yes

```
left   CCC-----ACA-ATCATAAC-----AAGAAGATGGAGCTGGATCTATTATGTTTAAATAAATATTC
chrom  CCC-----ACA-ATCATAAC-----AAGAAGATGGAGCTGGATCTATTATGTTTAAATAAATATTC
right  GCCTGGGCGACAGAGCGAGACTCCGTCTCAAAAAAAAAAAAAAAAAAAAAAAAAAAAAAAAAAATAAATATTC
      1**111111***1*1*111**111111111**1**1*111*11111*111*11*11111*****
```

```
left   CCCTATGGCGTGAACCCGGGAGGCGGAGCTTGCAGTGAGCCGAGATCCCGCCACTGCACTCCAGC
chrom  CCCTATAT--TTTACAAGGTTAG-----GCACTG---CCAAAGCCTTTGATTA---TCCAAA
right  CCCTATAT--TTTACAAGGTTAG-----GCACTG---CCAAAGCCTTTGATTA---TCCAAA
      *****2222*22**22**22*22222222*****2**222*2*2*2**2222*2*2222*****22
```

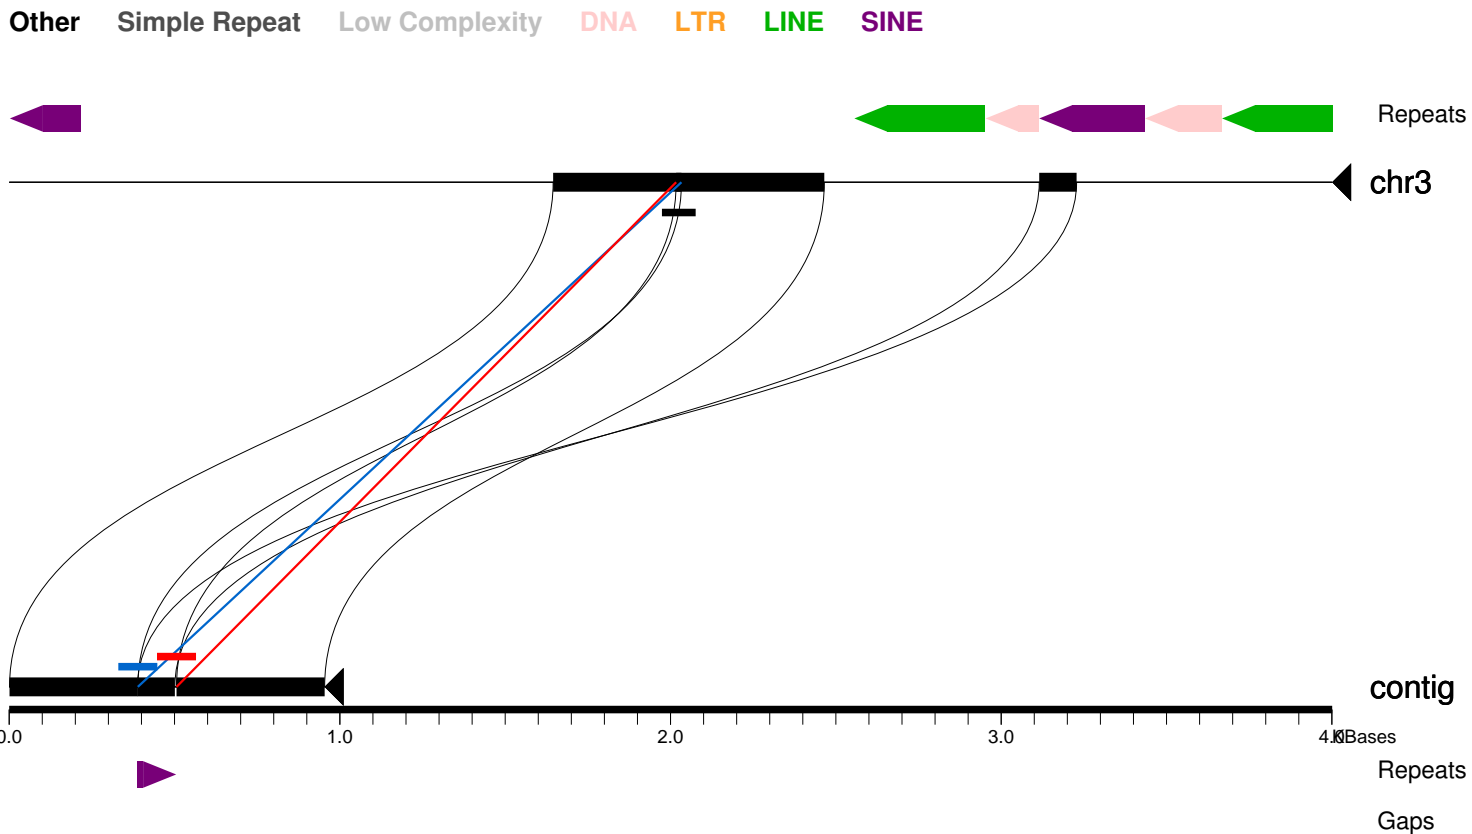



siteID: chr3\_24653516 Scaffitg1 - Breakpoint: chr3:24653529

chr3:24653508-24653588

Overlap Length: 37 INS size: 421 Genotyped: No

```
left   ACA-----TAAGCCTAGAAAAG-----ACAA-----AGAAGCTTTTT  
chrom  ACA-----TAAGCCTAGAAAAG-----ACAA-----AGAAGCTTTTT  
right  CCACCCGCCTCGGCCTCCCAAAGTGCTGGGATTACAGGCGTGAGCCACCGCGCCCGGCCAGAAGCTTTTT  
1**111111*11***111***1111111111***111111111111111111111111***
```

```
left   AAATTAAAAAAAAAAGAAACACCAAATC  
chrom  AAATTAAAAAAAAAAGAAACACCAAATCAGAAAAATAACTTCACAAAAA  
right  AAATTAAAAAAAAAAGAAACACCAAATCAGAAAAATAACTTCACAAAAA  
*****2222222222222222222222222222222222222222222222222222222
```

```
left   NNNNNNNNNNNNNNNNNNN  
chrom  -----  
right  -----  
22222222222222222222
```

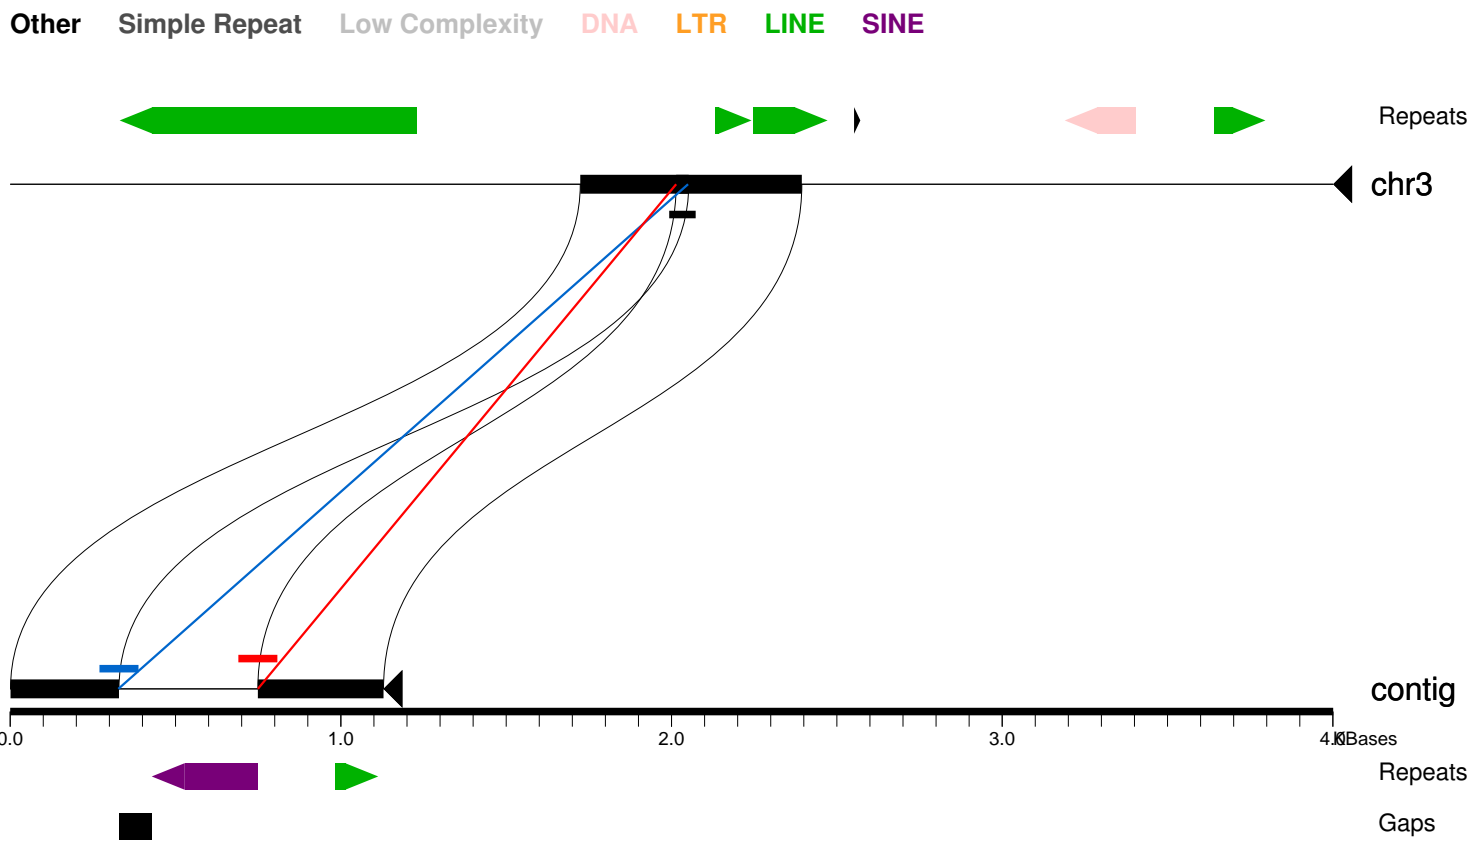

siteID: chr3\_25278469 Scaffitig8 + Breakpoint: chr3:25278448

chr3:25278400-25278507

Overlap Length: 12 INS size: 312 Genotyped: Yes

```
left  CCCCCGAAAT-----TCAGAGAATATCATTATTC-----TGATAATTCTGTTCTCTTATCCTGTTTCTT
chrom CCCCCGAAAT-----TCAGAGAATATCATTATTC-----TGATAATTCTGTTCTCTTATCCTGTTTCTT
right CCGCCCCGACTCGGCCTCCCAAAGTGCTGGGATTACAGGCGTGAGCCACCGCGCCCGGCCTCCTGTTTCTT
      **1*1111*1*111111**11*1*1*111111***1111111***11111*1111*11111*11111*****
```

```
left  TTTTTTTTTTTTTTTTTTTTTTTTTTTTTTTTTTTTGGAGA-CGGAGTCTCGCTCTGTCGCCCAGG
chrom TACCTAACTCTAAACACAAGTTGTTGGTCTTCCAGAACTGAGTCA-----GTCA-----
right TACCTAACTCTAAACACAAGTTGTTGGTCTTCCAGAACTGAGTCA-----GTCA-----
      *222*222*2*22222222**2**22*2**22**2*2**222222***2222222***2222222
```

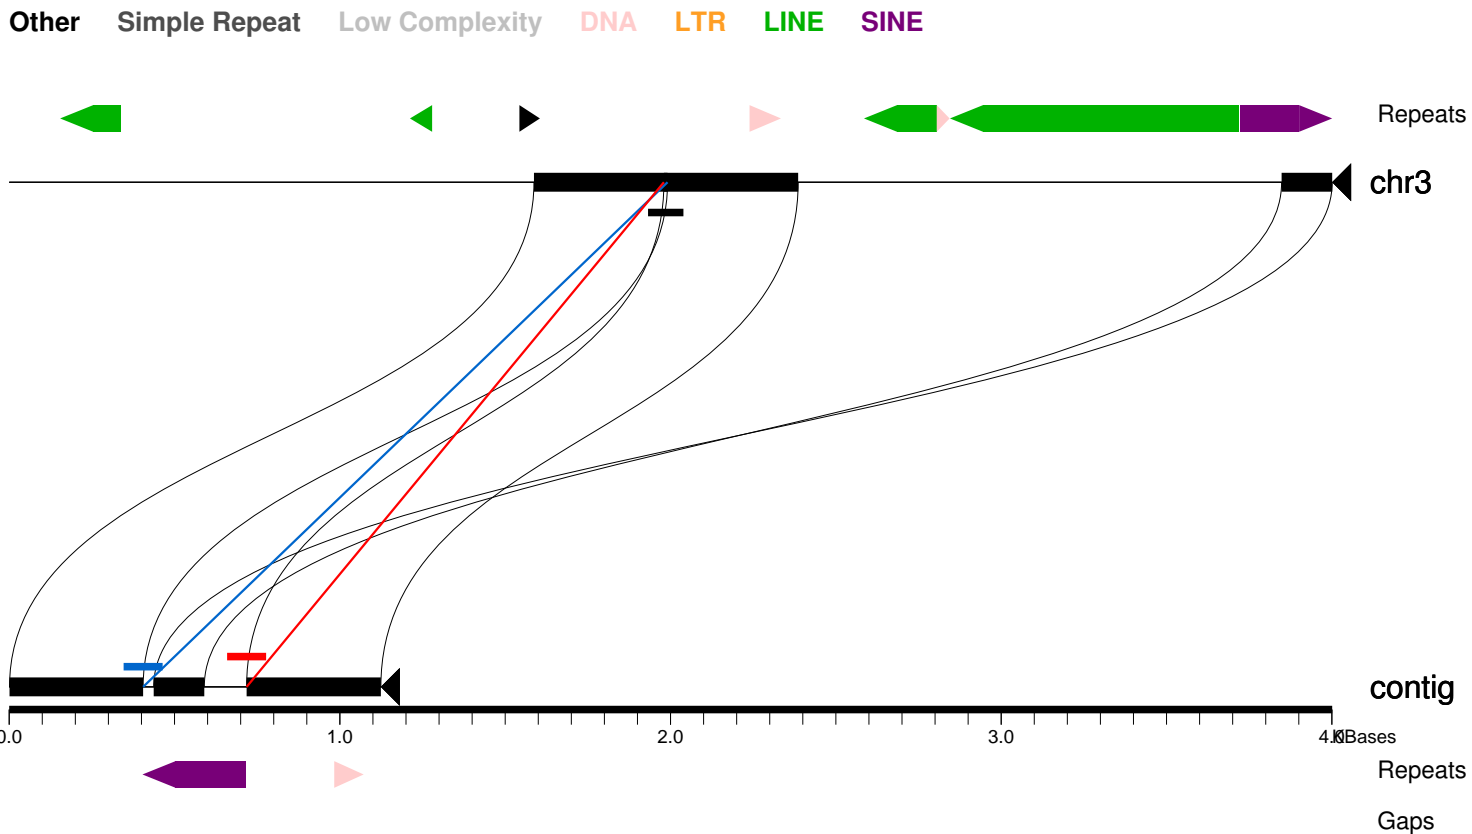

siteID: chr3\_27899258 Scaffitg1 + Breakpoint: chr3:27899267

chr3:27899107-27899429

Overlap Length: 3 INS size: 308 Genotyped: Yes

```
left ---CTACAACCATTTGGTCCCTTGACAAAAGCTCACAAAAACAAGCAATGAGGAAAAGGATTCCTTATTTAAT
chrom GACCTACAACCATTTGATCCTTGACAAAAGCTCACAAAAACAAGCAATGAGGAAAAGGATTCCTTATTTAAT
right AGG--AGAATGGCGTGAACCC---CAGGGGGCGGAGGCT---GCAGTGAGCCGAG-ATTGC-----
NNN11*1**11111**21**1111**11*11*11*1111111***1****111**1***1*111111111
```

```
left AAATGATGCTGGGATAACTGGCTAGCTATATGAAGAAAATTGAAACTGGACCCCTTCCTTTTACCTTATA
chrom AAATGATGCTGGGATAACTGGCTAGCCATATGAAGAAAATTGAAACTGGACCCCTTCCTTTTACCTTATA
right ----GCCACTGC----ACT--CCAGCC---TGGGCGACAGCGAGACT-----CCGTCTCAAAAAA
1111*111***11111***11*1***2111**1111*1*11**1***111111111**1*1*11111*1*
```

```
left CAAAAATTAACCTCAAGATGGAT---GGCCGGGCGCGGTGGCTCACGCCTGTAAT---CCCAGCA-----
chrom CAAAAATTAACCTCAAGATGGAT---GGCCGGGCGCGGTGGCTCACGCCTGTAAT---CCCAGCA-----
right AAAAAATTAACCTCAAGATGGAT---GGCCGGGCGCGGTGGCTCACGCCTGTAAT---CCCAGCA-----
1*****11**111**1*111**222*2*22222222222*2**222*2***2222*2**2*22222
```

```
left -CTTTGGGAGGCC-----GAGGTGGGC--GGATCACGAGGTCAGGAGATCGAGACCATCC----TGGCT
chrom TCTAGGCAATACCATTCAGGACATAGGCATGGGCAAAAAATTCATGACAAAAATGCCAAAAAGCAATTGCA
right TCTAGGCAATACCATTCAGGACATAGGCATGGGCAAAAAATTCATGACAAAAATGCCAAAAAGCAATTGCA
2**22*22*22**222222**22*2***22**222*22*22***2**2*222*22***2222222*2**2
```

```
left AACACGG-----TGAAACCCCGTCTCTA-----CTAAA----
chrom ACAAAGCAAAAAATGATAAATGGGATTTAATTAACCTAAAGA--
right ACAAAGCAAAAAATGATAAATGGGATTTAA-----ACTAAAGAGC
*22*22*222222**2*2222*22*2**2 2*****2211
```

Other Simple Repeat Low Complexity DNA LTR LINE SINE

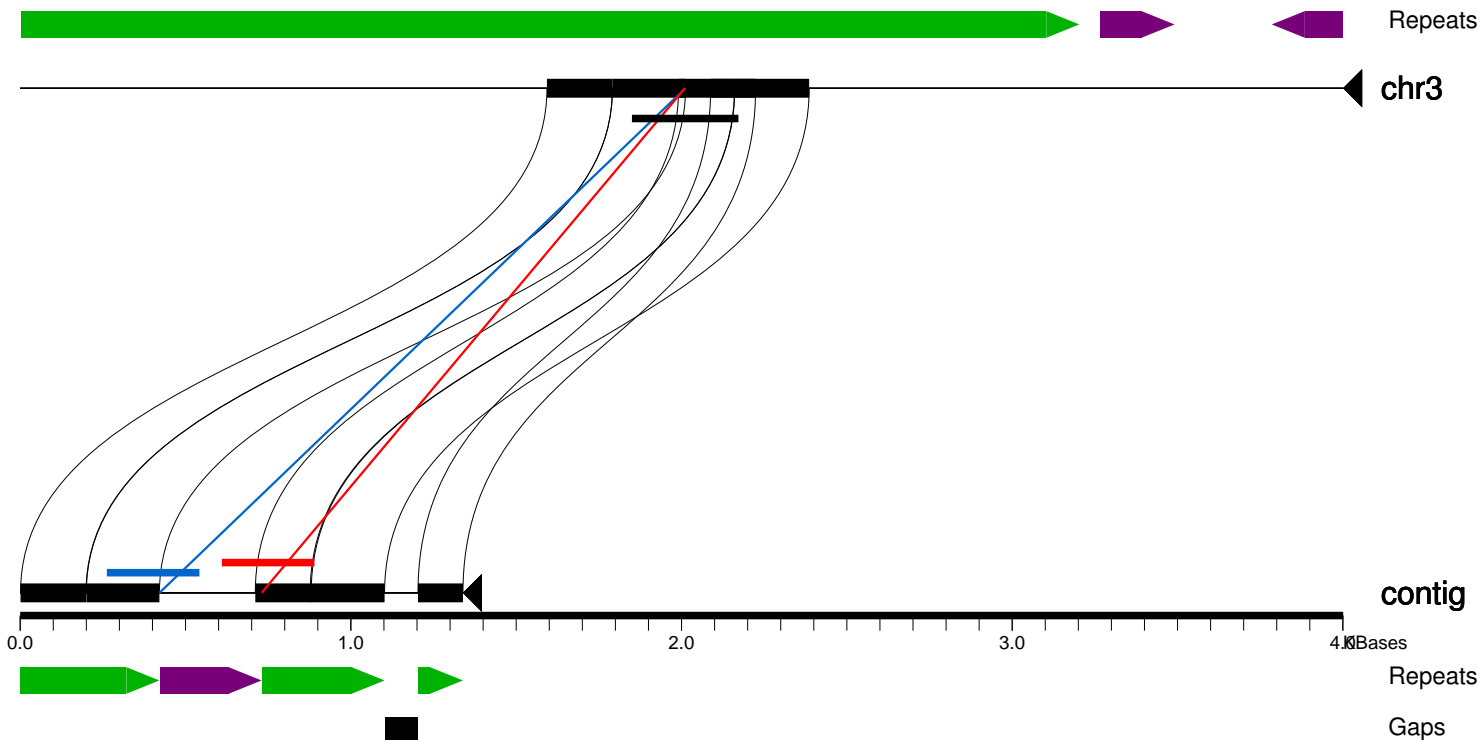

siteID: chr3\_28707036 Scaffitig5 - Breakpoint: chr3:28707045

chr3:28706885-28707218

Overlap Length: 14 INS size: 258 Genotyped: Yes

left -----TAAAAACTGTGAAAAGATTTTACAGCTGGATATTACTCTTCCCAAGCCTTTCTGGTTAG  
chrom CATTCTTCACTTTAAAAACTGTGAAAAGATTTTACAGCTGGATATTACTCTTCCCAAGCCTTTCTGGTTAG  
right AGAA--TGGCGTGAACCCGGGAGGCGGAGCTTGCAGTGAGCCGAGATCCCGCCACTGCACTCCAGCCTGG  
NNNN 2NN2N21\*\*11111\*1\*111\*\*11\*\*1\*\*\*111\*11111\*11\*11\*\*111\*\*11\*1\*1\*11\*1\*

left GATTGTCTTTCAAAGTGATCAAAGAATGTTGGAGATACAAATAATCTGAGAAGATTCATCTAGTCTGGA  
chrom GATTGTCTTTCAAAGTGATCAAAGAATGTTGGAGATACAAATAATCTGAGAAGATTCATCTAGTCTGGA  
right GCGA-----CAGAGCGAG---ACTCCGTCTCAAAAAAAAAAAAAAAAAAAAAAAAA-----A  
\*11111111111\*\*1\*1\*1\*\*1111\*1111\*\*111\*1\*1\*1\*\*\*1\*\*1111\*1\*\*1\*111111111111111\*

left ATGTCTTCCATTCCACAGATAAAAAGCCCCAGAGACGGATCACGAGGTC---AGGAGATCG---AGACCAT  
chrom ATGTCTTCCATTCCACAGATAAAAAGCCCCAGAGAT--ATCACGTGGCTTATACAAGCTTCCACAGAATAT  
right A-----AAAAAAAAAACCCCCAGAGAT--ATCACGTGGCTTATACAAGCTTCCACAGAATAT  
\*111111111111111\*1\*1\*1\*\*\*1\*\*\*\*\*222\*\*\*\*\*2\*\*22222\*22\*\*2\*22222\*\*\*22\*\*

left CCCGGCTAAA--ACGGTGAA-----ACCCCG---TCTCTACT--AAAAATACAAAAAAAAAATTA  
chrom TAGAGATAGACTAGAGTGCCCTTTATTTCTACACAGGTTTGTGTATTGGAAGAGTACCTAAACATACTG  
right TAGAGATAGACTAGAGTGCCCTTTATTTCTACACAGGTTTGTGTATTGGAAGAGTACCTAAACATACTG  
2222\*2\*\*2\*22\*22\*\*\*222222222222\*\*2\*2\*222\*2\*2\*\*2\*22\*\*2\*2\*\*\*22\*\*\*2\*2\*2\*2

left GC-----CGGGCGTAGTGGCGGG---CGCCTGTAGTCCCAGCTAC-----  
chrom TCACCAAAACAGGATCATTTCCCTCATCCCTCCTCAAGGACCTTATTCTGTACAGTT  
right TCACCAAAACAGGATCATTTCCCTCATCCCTCCTCAAGGACC-----  
2\*2222222\*2\*\*222\*2\*22\*2222222\*2\*\*\*22\*\*22\*\*NNN1N1

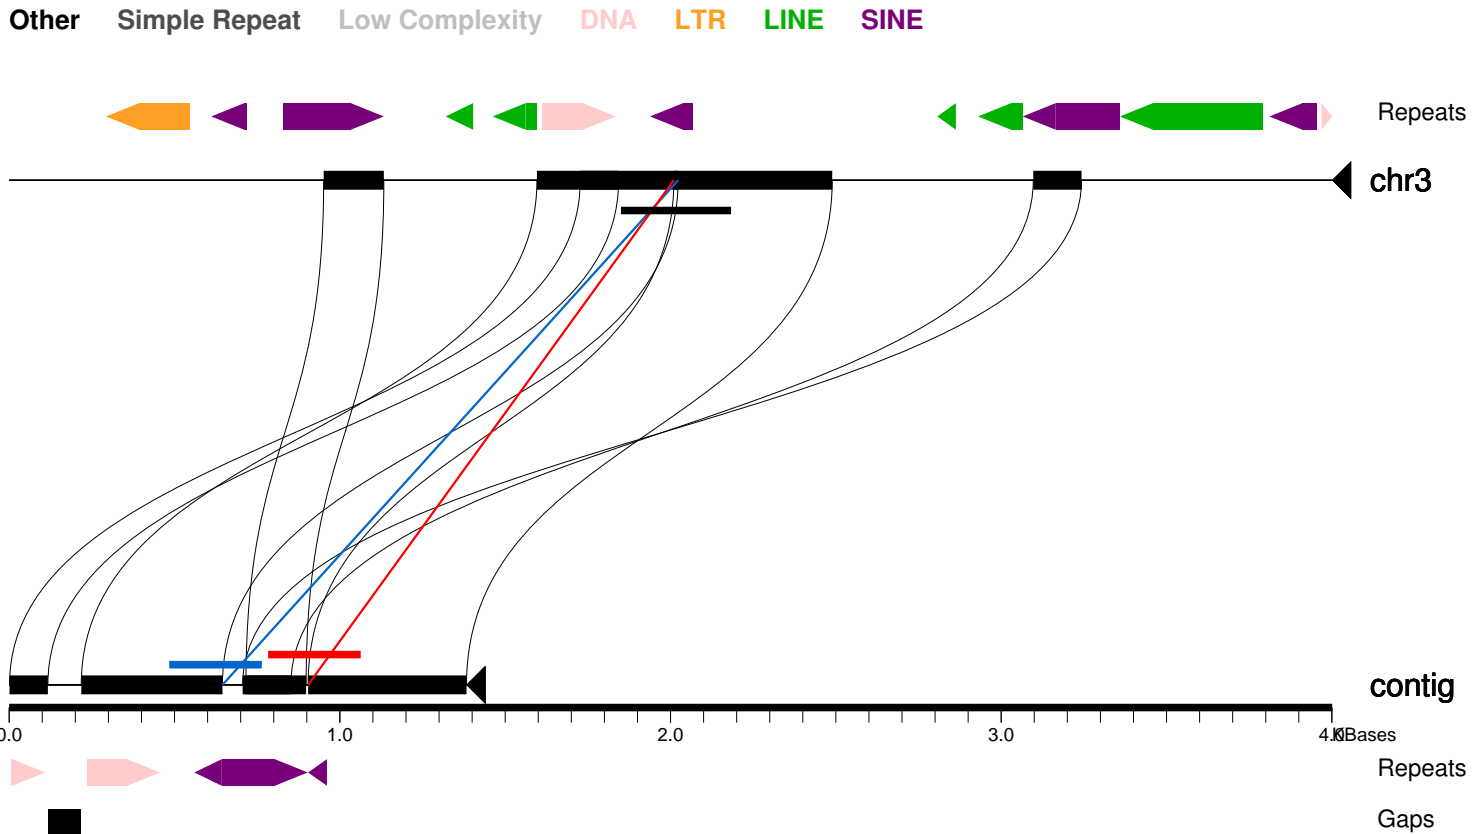



siteID: chr3\_29239870 Scaffitg4 + Breakpoint: chr3:29239885

chr3:29239725-29240059

Overlap Length: 15 INS size: 309 Genotyped: Yes

left GT-----TCTACCCAGTTTCGTATGTTTGATTTTTTAAAAAATCTCCTGCCGTGATAATT  
chrom GTGGTATTTTATGCTGTTCTACCCAGTTTCGTATGTTTGATTTTTTAAAAAATCTCCTGCCGTGATAATT  
right AGA-----ATGGAGTGAACCCGGGAGGCGGAGCTTGCAGTGAGCCGAGA---TCCCGCC-----  
11N 222NN221111\*\*11\*111\*\*1\*11\*\*11\*1\*111111\*1\*111\*\*\*1\*\*\*111111111

left ATTAAAAATTAACATTGAAGTTGATTAAATGCAATAAATGTCACATTAAATAGTAAATTTTTAAAAATTATC  
chrom ATTAAAAATTAACATTGAAGTTGATTAAATGCAATAAATGTCACATTAAATAGTAAATTTTTAAAAATTATC  
right -----ACTGCACTCCAGCCTGGGCGACAGA-GCGAGACTCCGTCTCAA-----AAAAA  
111111111111111\*1\*\*1\*1\*11\*111111\*\*1\*1\*1\*1\*11\*1\*1\*111\*111\*\*\*1111\*\*\*\*11\*11

left AATAAAATATTAACTTATAGAAATAAGCTAGATTTCGGC-----CGGGCGCGGTGGCTCACGCC  
chrom AATAAAATATTAACTTATAGAAATAAGCTAGATTTCGGC-----CGGGCGCGGTGGCTCACGCC  
right -----AAATAAGCTAGATTCAAATATTTAGTTGCTAGCATGGTGTCTTATACAG  
AAAAA\*\*\*\*\*11\*111111\*1\*\*\*\*\*222222222222\*22\*\*22\*\*\*\*2\*\*2\*22\*22

left GTAA--TCCAGCACTTTGGGAGGCCGAGGCGGGCGGATCACGAGGT-----CAAGAGA-----T  
chrom TTTGGTTATGATCACTGGGGCAAGATTAACCTCTCTTTATAATAGGGAATCTGACACATGAGAAGAATTT  
right TTTGGTTATGATCACTGGGGCAAGATTAACCTCTCTTTATAATAGGGAATCTGACACATGAGAAGAATTT  
2\*2222\*222\*2\*\*\*\*22\*2\*2\*222\*22\*222\*22222\*22\*\*\*2222222222\*\*2\*\*\*\*222222\*

left CGAGACCATCCCGCTAAAACGGTGAACCCCGTCTCTACTAAA-----  
chrom CAAGATTTTTTTTTTCCAAACATGGCA--CCATTCT-TACAAAAGGCACATGAGATGG  
right CAAGATTTTTTTTTTCCAAACATGGCA--CCATTCT-TACAAAAGG-----  
\*2\*\*\*222\*22222222\*\*\*\*222\*2\*22\*\*22\*\*\*2\*\*\*2\*\*\*22

Other Simple Repeat Low Complexity DNA LTR LINE SINE

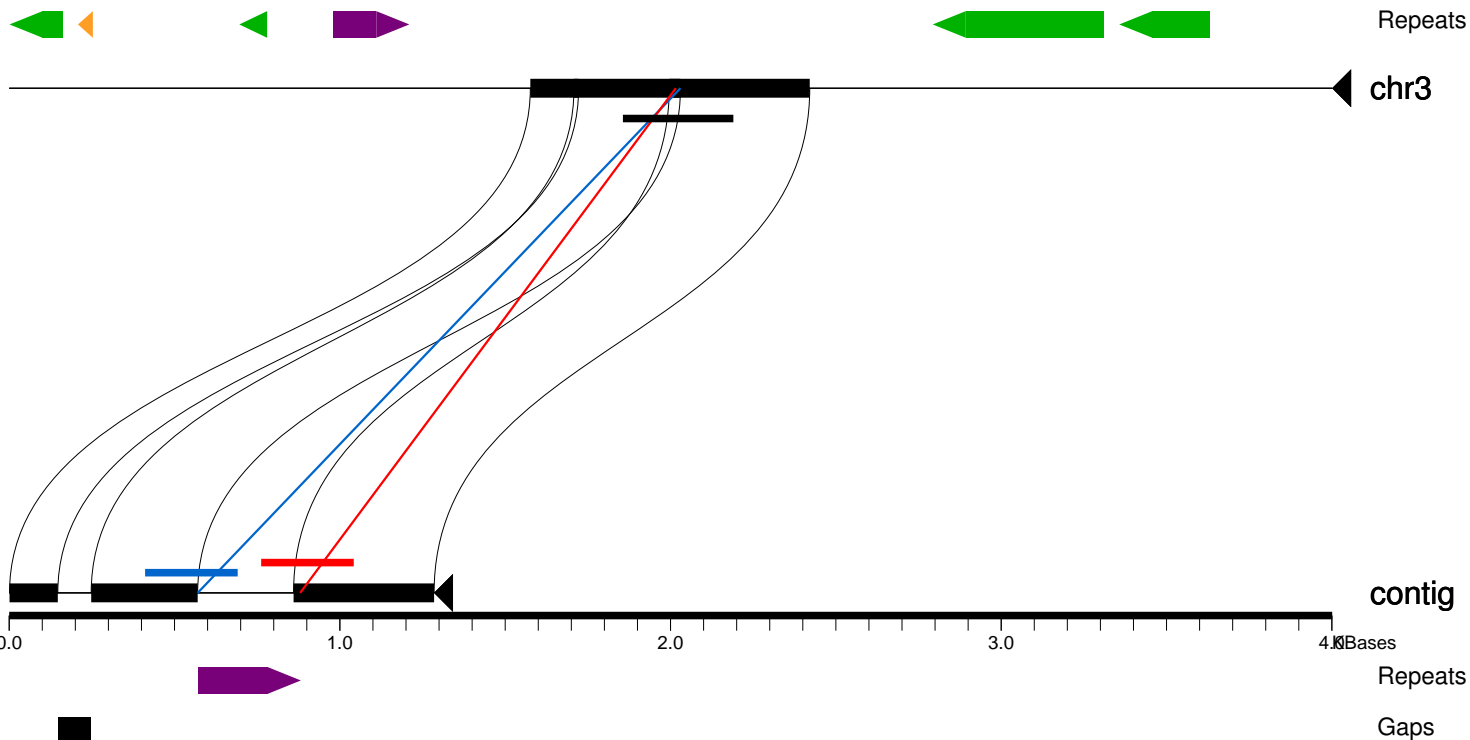

siteID: chr3\_2961985 Scaffitg1 + Breakpoint: chr3:2961992

chr3:2961832-2962164

Overlap Length: 13 INS size: 310 Genotyped: Yes

```
left -----CCAAAAGGACACATACTGTA-TGATTACACACCACACACACACAGACTCTCTCTC
chrom A-AGGAACAAAAACTCCAAAAGGTCACATACTGTA-TGATTACACACCACACACACAGACTCTCTCTC
right AGAATGGCGGGAAC-CCGGGAGG-CGGAGCTTGCAGTGAGCCGAGATCGCGC-CAC-CGCACTC-----C
      212NNNN2NNN222 **111***N*11*111**1*1***1111*1*1*1*1***1*11***11111*

left ACACACATATGTATCTAAAAACATTCTCAGAATGACTAAACTATAGTAATGGGAAGAGGTCAGTGGTTTCC
chrom ACACACATATGTATCTAAAAACATTCTCAGAATGACTAAACTATAGTAATGGGAAGAGGTCAGTGGTTTCC
right AGCC---TGGGCGACAGAGCCAGACTCCGTCTCAAAAAAAAAAAAAAAAAAAAAAAAA-----
      *11*111*11*111*11*11**11***1*11*1*11**11*1*11**1111*1*111111111111111

left AGGGGTTACAGAGGGGAGGTAGAAAGAGGCTGGATTTGGCCGGGCGGGTGGCTCACG-----CCTG
chrom AGGAGTTACAGAGGGGAGGTAGAAAGAGGCTGGATTTGGCTGACTGTGAAGGGGAAGCAAGAGGAAGATCCTTG
right -----AAAAAA*AAAGAGGCTGGATATGACTGTGAAGGGGAAGCAAGAGGAAGATCCTTG
      111N1111111111111111*111*1*1*N*****22*2*2*2222*2*222*2*22222222*2**

left TAA-----TCCCAG---CACTTTG---GGAG-----GCCGAG---ACGGGCGGATCACGAGGT
chrom TGACAATAGAATAGTTCCCTATCTCAGTTTCCATGGTGCTTTTGCCAGTCTACATGTGTGATACATACA
right TGACAATAGAATAGTTCCCTATCTCAGTTTCCATGGTGCTTTTGCCAGTCTACATGTGTGATATATACA
      *2*222222222222***22222*2***2222*2*22222***2**222*22*2*2222*122222

left CAGGAGATCGAG-ACCATCTGGCTAACACGGTGAAACCCCGTCTCTAC-TAA-A
chrom CATTATACCAAGTATCAGTTTCTTTGTTTTTGTATTTAACTGTATCTACATAAGA
right CATTATACCAAGTATCAGTTTCTTTGTTTTTGTATTTAACTGT-----
      **22*2*2*2**2*2**22*22*22222*222222*2**N11111 111 1
```

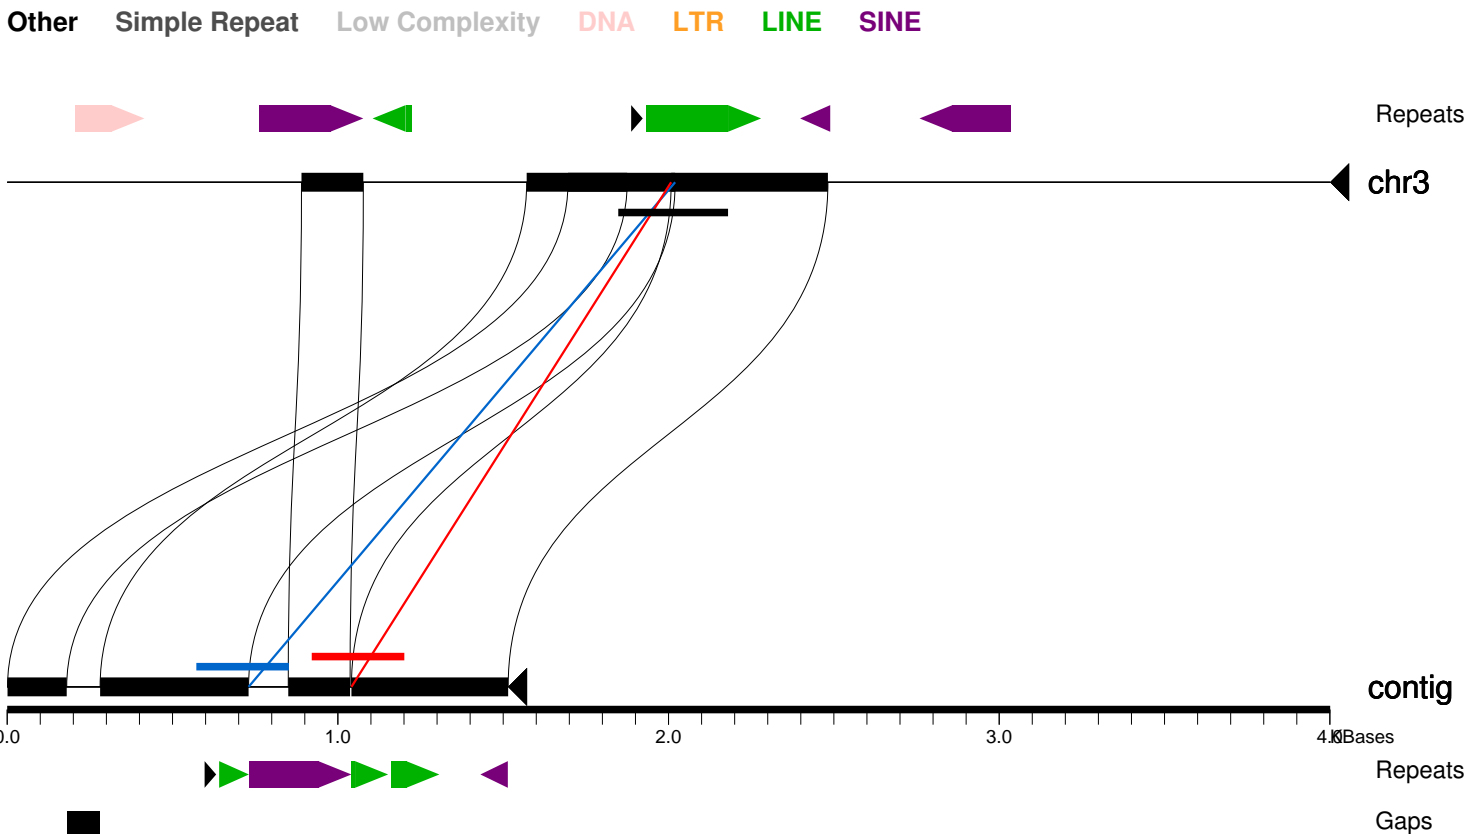

siteID: chr3\_31210597 Scaffitig4 - Breakpoint: chr3:31210585

chr3:31210539-31210632

Overlap Length: 13 INS size: 299 Genotyped: Yes

left A-----AGACTGGGGAAAACAG-GAC-CTTTCATGGGGGTAAATAAAATCT  
 chrom A-----AGACTGGGGAAAACAG-GAC-CTTTCATGGGGGTAAATAAAATCT  
 right GCCGAGATCCCGCCACTGCCTCCAGCCTGGGGCAGACAGAGCGAGACTCCGTCTCAAAAAAAAAAAAAAAAAAA  
 111111111111111111111111111111111111\*\*1\*\*\*\*\*11\*1\*1\*1\*1\*\*11\*111\*1\*1111111\*\*\*1\*\*\*\*111

left TAAGAGTAGGATGTGGGCCGGGCGCGGTGGCTCACGCCGTGTAATCCCAGCACTTTGGGAGGCCGAGGCGG  
 chrom TAAAGAGTAGGATGT-----GATCTCTCTATTCATAGGTACAATGTCGGA-----ATGTG-  
 right AAAGAGTAGGATGT-----GATCTCTCTATTCATAGGTACAATGTCGGA-----ATGTG-  
 1\*\*\*\*\*222222222222222\*2\*2\*2\*222\*2\*2222\*2\*2\*2\*2\*\*\*22222\*2\*2\*2

left GCGG  
 chrom ----  
 right ----  
 2222

Other Simple Repeat Low Complexity DNA LTR LINE SINE

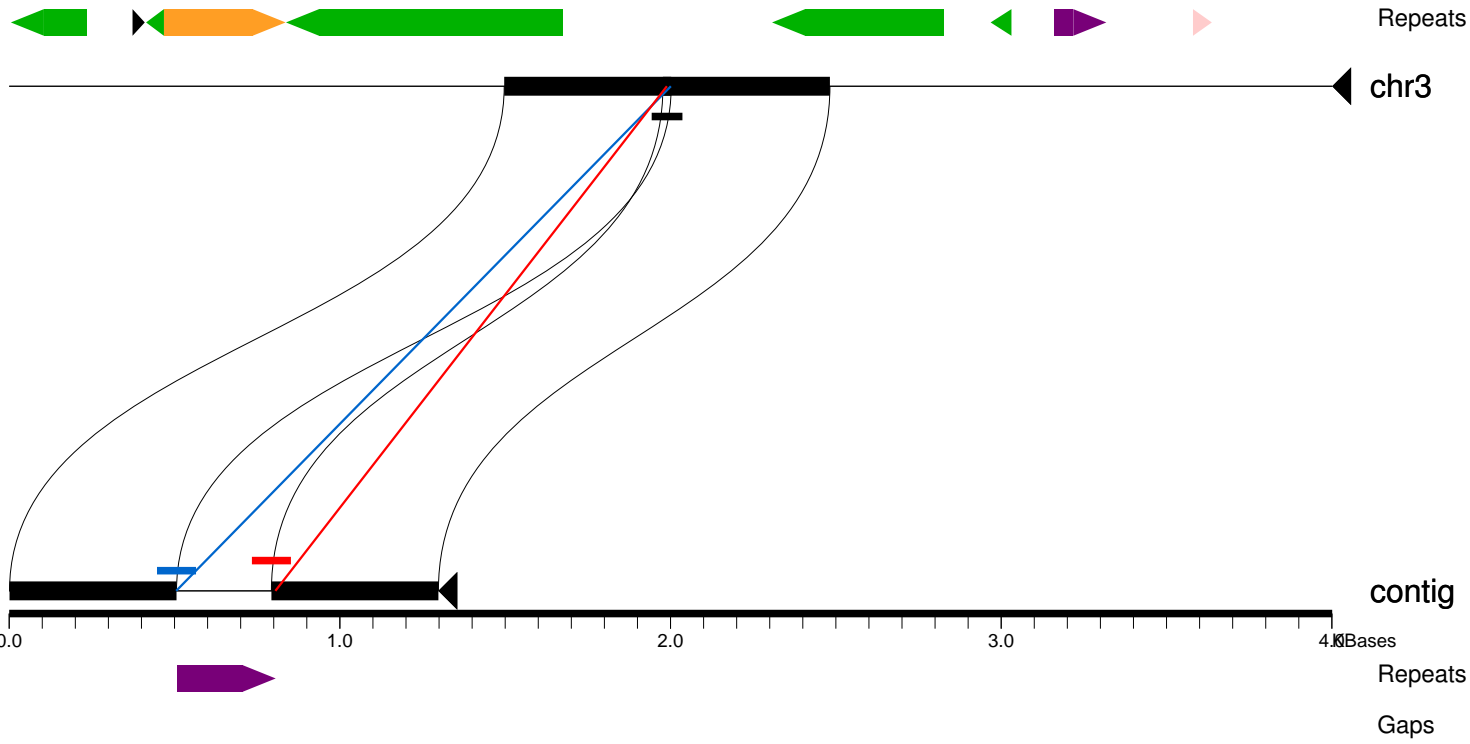





siteID: chr3\_31881405 Scaffitg29 - Breakpoint: chr3:31881383

chr3:31881339-31881437

Overlap Length: 16 INS size: 314 Genotyped: Yes

```
left   -----TACCACCTA-----AGGCTCATGC---AGACACAGAGAATGACAAGCAAATTAGAAGA
chrom  -----TACCACCTA-----AGGCTCATGC---AGACACAGAGAATGACAAGCAAATTAGAAGA
right  CGCAGTCCGACCTGGGCGACAGAGCGAGACTCCGTCTCAAAAAAAAAAAAAAAAAAAAAAAAAAAGAAGA
        11111*1*1****1111111111111111**1***111*111*1*1*1*1*1**11*1**11***11*****

left   ATGGGTTTCAGGCCGGGCGCGGTGGCTCACGCCTGTAATCCCAGCACTTTGGGAGGCCGAGGCGGGTGG
chrom  ATGGGTTTCATA-----AGCTTCTCCT-----CAGGGTCATAGTCAGGT--ATTAAATT--
right  ATGGGTTTCAATA-----AGCTTCTCCT-----CAGGGTCATAGTCAGGT--ATTAAATT--
        ******2222222222222222***22*2***222222*22*22*2*2*22***222*222222*22
```

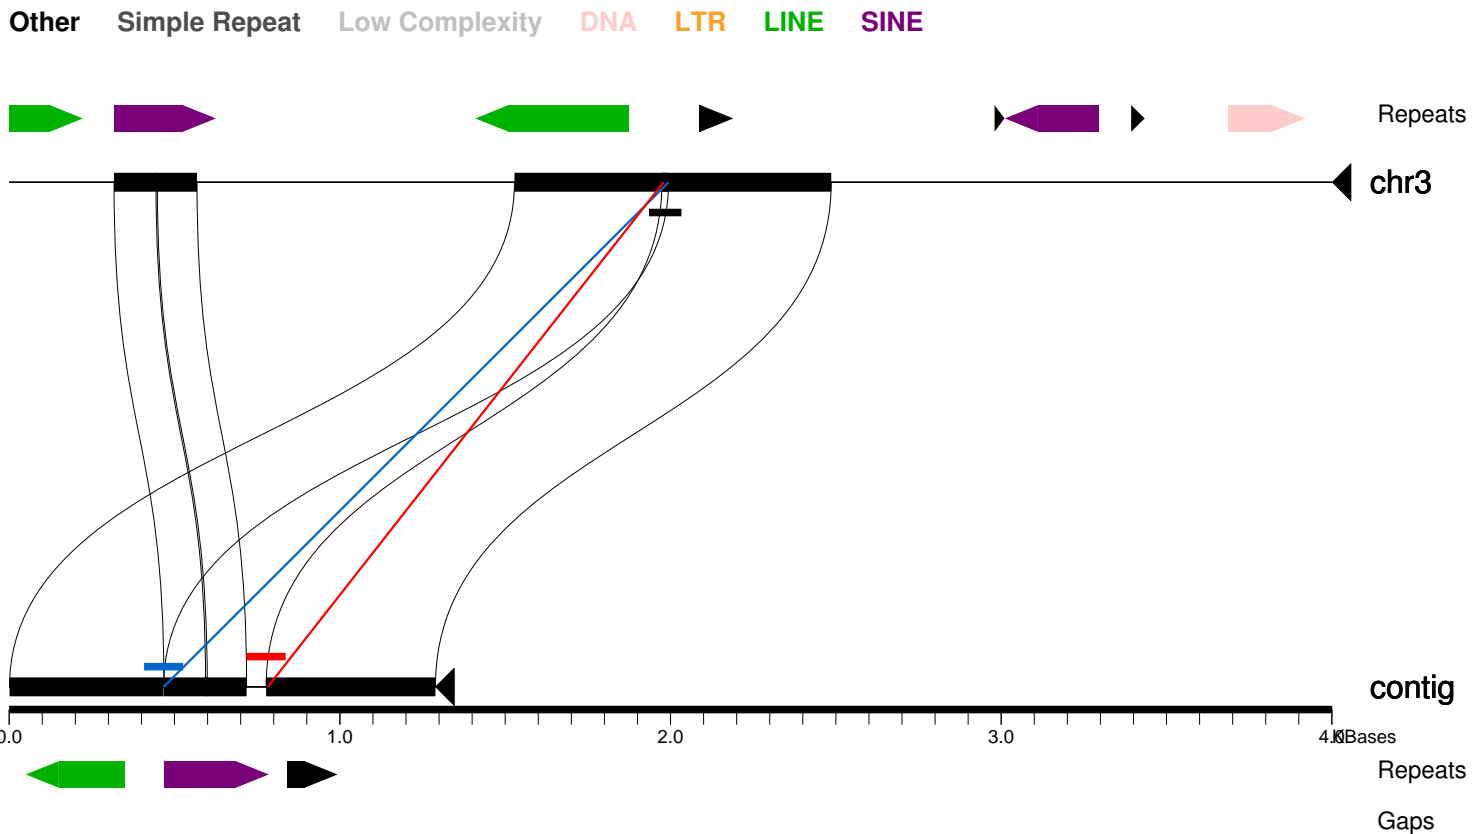

siteID: chr3\_31935164 Scaffitig1 - Breakpoint: chr3:31935193

chr3:31935144-31935245

Overlap Length: 11 INS size: 325 Genotyped: Yes

```
left AAAGA--AAATGTGGCATA-TCCATCCCATGGCATACTA-----TTCAGCAATAAAA---GTAC
chrom AAAGA--AAATGTGGCATA-TCCATCCCATGGCATACTA-----TTCAGCAATAAAA---GTAC
right CCTGGGCAACAGAGCGAGACTCCGTCTCAAAAAAAAAAAAAAAAAATAAATAAATAAAAAAAAAAATAAAAAAAGTAC
      111*111**11*1*11*1*1***1**1**1111*1*11*1111111111*11*11*****111***
```

```
left AACATGGGCCAGGCGCGGTGGCTCACGCCTGTAATCCCAGCACTTTGGGAGGCCGAGGCGGGTGA
chrom AACATGG---ATGAAC-----CTCAAAAAACATTATGC-----TAAAGGAGCCAGATGAAAA---A
right AACATGG---ATGAAC-----CTCAAAAAACATTATGC-----TAAAGGAGCCAGATGAAAA---A
      *****222*2*22*22222*****222222*2**2*222222*222*****2*2**2*222222*
```

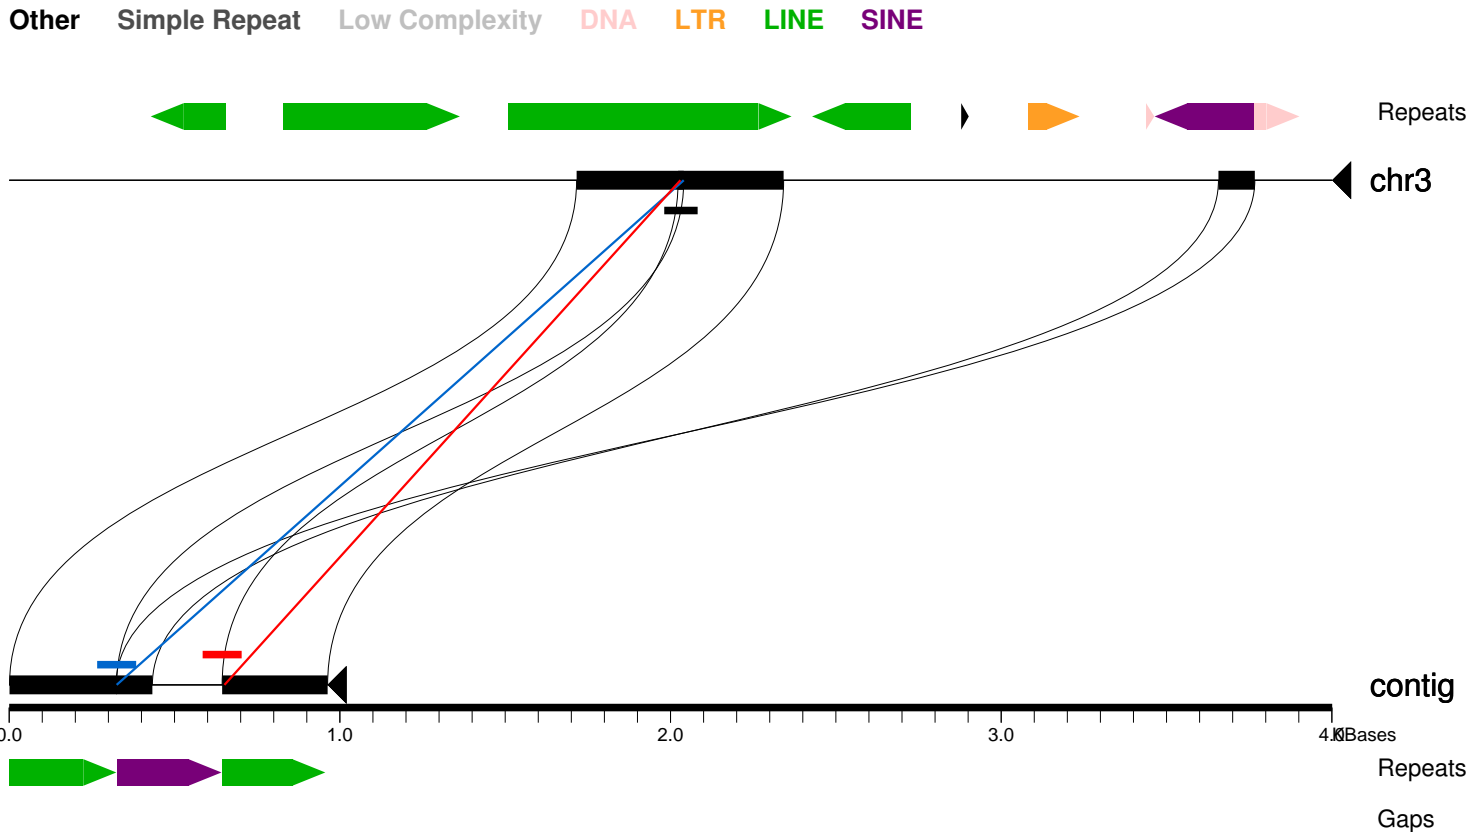

siteID: chr3\_32229423 Scaffitg3 - Breakpoint: chr3:32229401

chr3:32229241-32229575

Overlap Length: 15 INS size: 305 Genotyped: Yes

left -----GGTTTCTTTTCATTTTCGGGAAGATGTCCTTG--AAGCATAATAGTTTTTAATTTTGATGA  
chrom CATTTCAGTGGTTTTCTTTTTCACTTTTCCGGGAAGATGTCCTTG--AAGCATAATAGTTTTTAATTTTGATGA  
right --TTTAGTAGAGA-----CGGAGTTTCACCGTGTAGCCAGGATGGTCTCGA--TCTCCTGA  
22N2221\*111111111111111111111111\*\*\*111\*11\*\*1\*\*11\*11\*\*11\*\*1\*\*1\*11\*11\*1\*11\*\*\*

left AGTCCCATTTATCTATTTTTTCTTTTTGTTGCTTGTGCTGTTGGTGTATATAGCTAAGAAACCATTCGCCTAA  
chrom AGTCCCATTTATCTATTTTTTCTTTTTGTTGCTTGTGCTGTTGGTGTATATAGCTAAGAAACCATTCGCCTAA  
right CCTCG---TGATCCGCCCG--CCTCGGCCTCCCAAAGTGCTGGGATTACAGGCGTGAG--CCACCGCG---  
11\*\*1111\*1\*\*\*111111111\*1\*11\*111\*111111\*1\*\*\*11\*\*1\*\*1111\*\*11\*\*11\*\*1111

left TCCAAGATCATGAAGATTGAAGCCTATGCATTCTTTT-----TTTTTTTTTTT-----TTTTTTT  
chrom TCCAAGATCATGAAGATTAGGCCTATGCATTCTTTTAAAGAGTTGTATAGTTTAGCTCTCACATTTATTT  
right -CCCGGCC---GAAG-----CCTATGCATTCTTTTAAAGAGTTGTATAGTTTAGCTCTCACATTTATTT  
1\*\*11\*11111\*\*\*111N1N1\*\*\*\*\*2222\*2\*2\*22\*\*\*222222222\*\*\*2\*\*\*

left -----TTGAGACGGAGTCTCGCTCTGTCGCC-AGGCTGGAGTGCAGTGGCGCGACCTCGG  
chrom AGGCCTTTGCTCCATTTTGATGAAGTTTGTG-TATATGGCATGAAGCAGGAGTTCAATTTTCGTT-CTTTTG  
right AGGCCTTTGCTCCATTTTGATGAAGTTTGTG-TATATGGCATGAAGCAGGAGTTCAATTTTCGTT-CTTTTG  
2222222222222222\*\*\*22\*\*2\*2\*\*\*2\*2\*2\*2\*2\*2\*2\*222\*2\*\*2\*\*\*\*\*2\*\*2\*22\*\*22\*2\*22\*

left CTCACTGCAAGC-----TCCGCCTCCCGGGTTCACGCCA-----TTCTCC-----T  
chrom CATATGGCTAGCCAGTTGTTTTCACCATCATTTTTTGAAGAACTTCCTTGTCCACTGAAT  
right CATATGGCTAGCCAGTTGTTTTCACCATCATTTTTTGAAGAA-----  
\*22\*22\*\*2\*\*\*222222\*2\*2\*\*22\*2222\*2\*2\*221 11N111 1

Other Simple Repeat Low Complexity DNA LTR LINE SINE

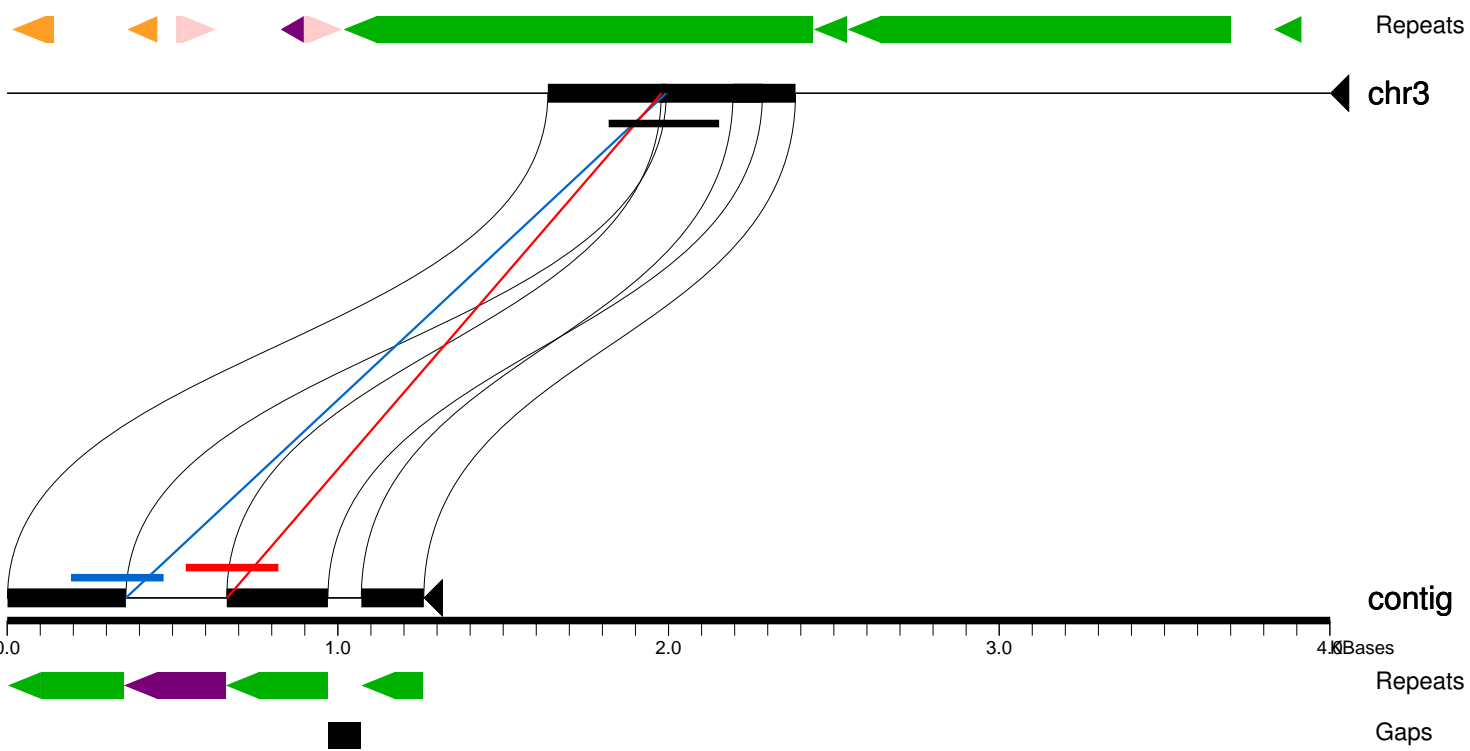

siteID: chr3\_35159317 Scaffitg1 - Breakpoint: chr3:35159375

chr3:35159250-35159533

Overlap Length: 9 INS size: 383 Genotyped: No

```

left      -----GGAGGTT
chrom     TAGAAGATAAGCTTTAGTCATTTACCATTTGAATATATGATGTTTCATTTGGTATTTTATGTACATGGAGGTT
right    NNNNNNNNNNNNC-----AGAGCGAG---
          NNNNNNNNNNNN2                               2N2N1***111

left      TTCTTATGTTGAGTTAGTTCTTTCTATTCCCTAGTTTGGATGAGTGCTTTTTATCATAAAAAAAGTTGGCCGG
chrom     TTCTTATGTTGAGTTAGTTCTTTCTACTCCTAGTTTGGATGAGTGCTTTTTATCATAAAAAAGTTTGAAT
right    -----ACTCC--GTCTCAAAA-----AAAATAAAGTTTGAAT
          11111111111111111111111111111111*2***11**1*1*11*1111111111111111*1*****222222

left      GCGCGGTGGCTCACGCCTGTAATCCAGCACTTTGGGAGGCCGAGGCGGGTG-----GA
chrom     TTTTTTTTCAACTGTCTTTTTTCTGCATCTTTTGAGATAATTATGTGTTTTTTCCCCCTTTAACTCTGT
right    TTTTTTTTCAACTGTCTTTTTTCTGCATCTTTTGAGATAATTATGTGTTTTTTCCCCCTTTAACTCTGT
          222222*2222*222*2*2*22*2222222***2**22222*2*2*22*2222222222222222*2

left      TCATGAGGTC-AGGAGATCGAGACCATCCTGGCT-AACAAG--TGAAACCCCGTCTCTACTAAAAATAC
chrom     TAATCTGGTGTATTACATATATATTTTCTGTGTTGAACAATCCTTGCATTCCAGGAATAAATCTCACTTG
right    TAATCTGGTGTATTACAT-----
          *2**22***22*22*2**NN1N1NNN11NNN1N1 11111NN 11N1NN11N1NNNNN1N1NNN1N1NN

left      AAAA
chrom     CTCT
right    ----
          NNNN
    
```

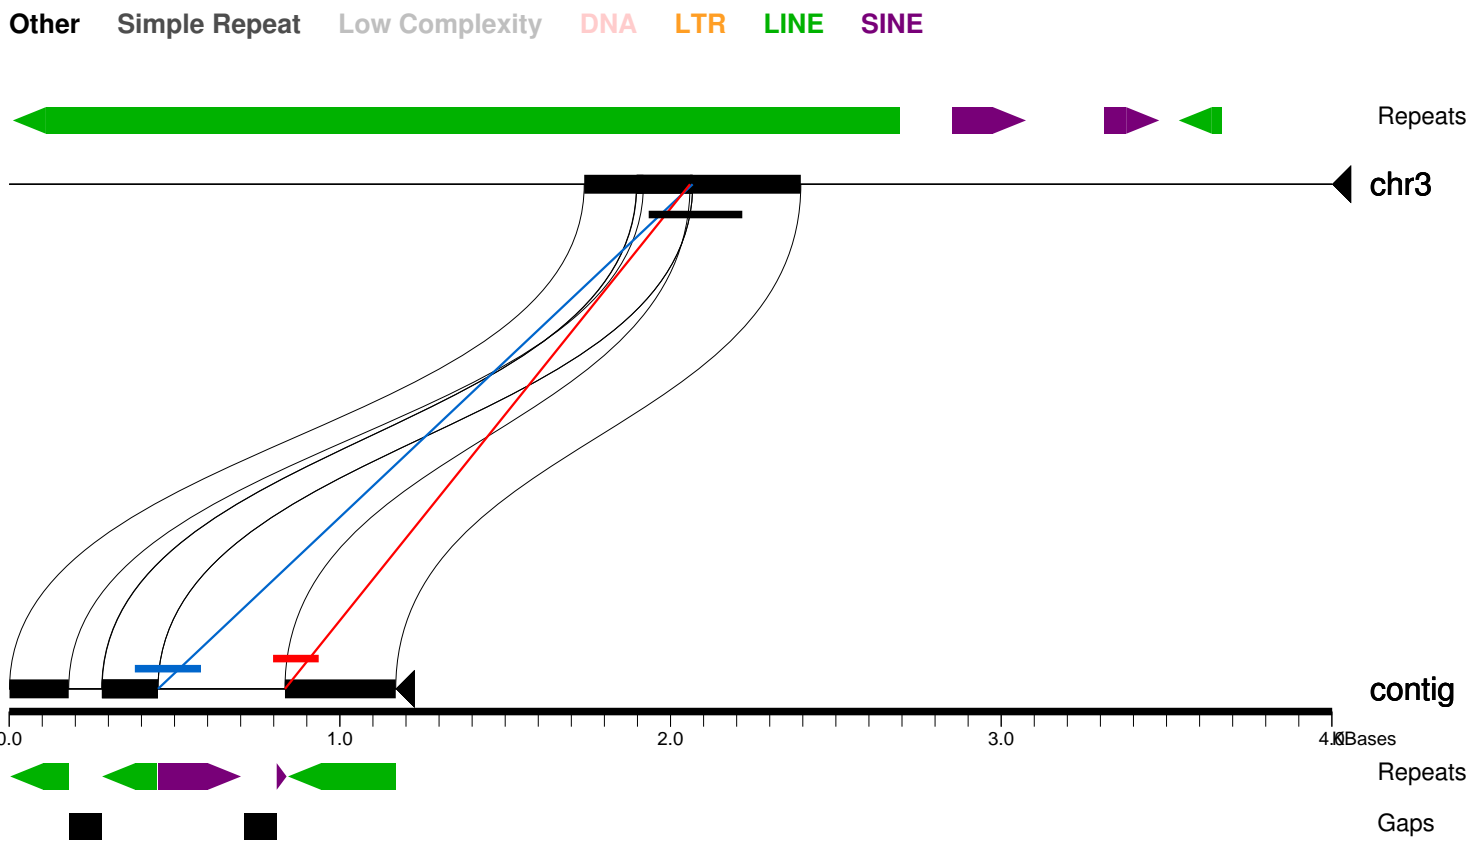

siteID: chr3\_35346629 Scafftig4 - Breakpoint: chr3:35346624

chr3:35346578-35346669

Overlap Length: 14 INS size: 313 Genotyped: Yes

```
left      T--AATGGA-----AAAGAAATCTTCC--CATGTATATTTCAAGGAAACTAT
chrom     T--AATGGA-----AAAGAAATCTTCC--CATGTATATTTCAAGGAAACTAT
right     GCCACTGCAGTCCGCAGTCCGGCCTGGGCGACAGAGCGAGACTCCGTCTCAAAAAAAAAAAAAAAAA
111*1**1*11111111111111111111111111111111*1**11*111***11*1111*1*1111**12***11*1
```

```
left      TAGAAAAGTAAAAATAGAGGGGCGGGGCGCGGTGGCTCACGCCGTGTAATCCCAGCACTTTGGGAGGCCGAG
chrom     TAGAAAAGTAAAAATAGATGCTTAAAA-----TTGATCA-----TTATTTTCATTTCTT-----CC---
right     AAAAAAAGTAAAAATAGATGCTTAAAA-----TTGATCA-----TTATTTTCATTTCTT-----CC---
1*1*****2*222222222222*2*2***222222*2**22**222***222222**222
```

```
left      GCGGGT
chrom     -----
right     -----
222222
```

Other    Simple Repeat    Low Complexity    DNA    LTR    LINE    SINE

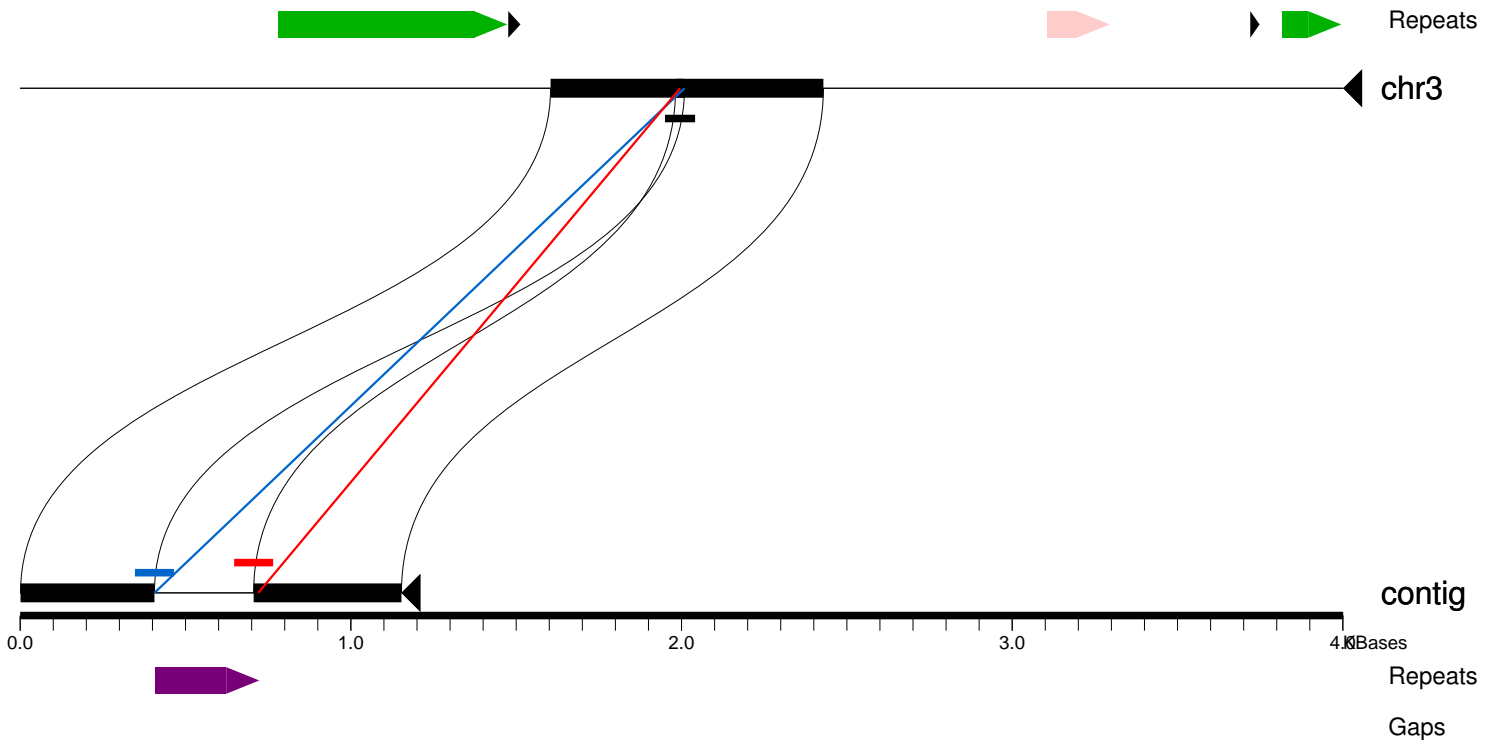

siteID: chr3\_36839167 Scafftig2 - Breakpoint: chr3:36839146

chr3:36839095-36839205

Overlap Length: 9 INS size: 400 Genotyped: No

```
left      CCTTTAACTGATCATTCATCATAGTTTTCTGCAATAAAAAATATATAATAT-----GAAATCAGT
chrom     CCTTTAACTGATCATTCATCATAGTTTTCTGCAATAAAAAATATATAATAT-----GAAATCAGT
right     TCCGCC-CGCCTCGGCCCTCCCAAAGTGCTGGG-ATTACAGGCGTGAGCCACCGCGCCCGGC-GAAATCAGT
          1*111111*111**111*111**1***11*11*1*1**1*1111*11111*111111111111*****
```

  

```
left      NNNNNNNNNNNNNNNNNNNNNNNNNNNNNNNNNNNNNNNNNNNNNNNNNNNNNNNNNNNNNNNNNNN
chrom     CTTTTAAATTTAATTATGTTAATGATTCATGTAATATGTAAGTAGTGATCT-----
right     CTTTTAAATTTAATTATGTTAATGATTCATGTAATATGTAAGTAGTGATCT-----
          222222222222222222222222222222222222222222222222222222222222222222
```

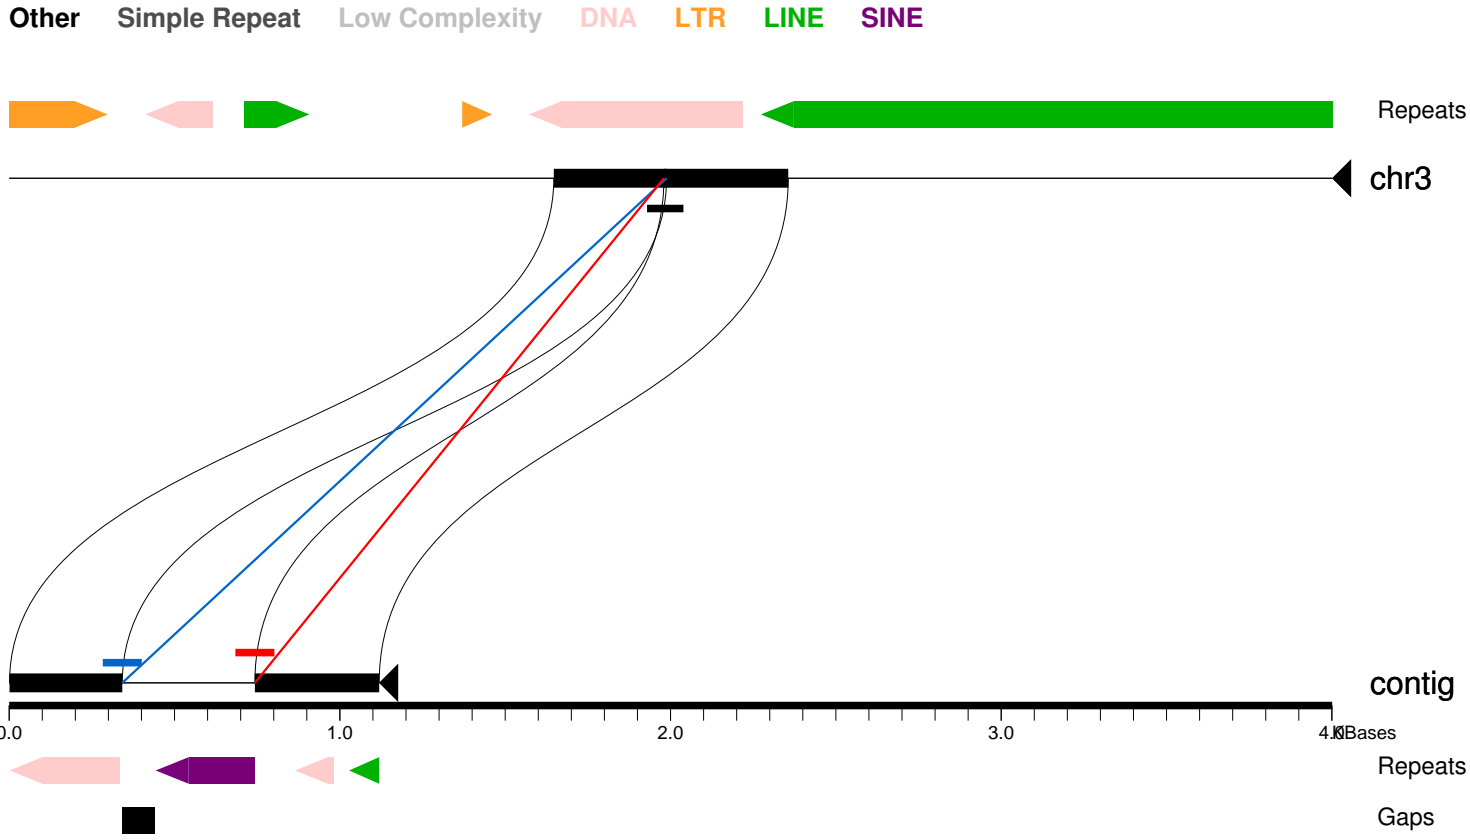







siteID: chr3\_41511248 Scaffitg1 + Breakpoint: chr3:41511239

chr3:41511079-41511405

Overlap Length: 7 INS size: 430 Genotyped: No

```

left   NNNNNNNNNNNNNNNNNNNNNNNNNNNNNNNNNNAAAAAAAA-----CACCTTAAAAGCCTAAAAAGATGGCTATCT
chrom  AGGCCTACACCTGCCAAAAAAAAAAAAAAAAAAAAAAAAAAAAACACCTTAAAAGCCTAAAAAGATGGCTATCT
right  NNNNNNNNNNNNNNNNNNNNNNNNN-----
left   NNNNNNNNNNNNNNNNNNNNNNNNN11111111 1111111111111111111111111111111111111111111111111111

```

```

left   CCTCAACTGCACAAACACCAATGCAAGAACACAAGAATTACAAAAGAAATCAGGAAATCATGATATATCCAA
chrom  CCTCAACTGCACAAACACCAATGCAAGAACACAAGAATTACAAAAGAAATCAGGAAATCATGATATATCCAA
right  -----
left   111111111111111111111111111111111111111111111111111111111111111111111111111111111111

```

```

left   AAGAAACTAAGAAAAGCTCCAACAATAGGCCGGGGCAGTGGCTCACGCCTGTAATCCCAGCACTTTGGGA
chrom  AAGAAACTAAGAAAAGCTCCAACAATAGGCCCTAAAAGAAAGGGTCAAAT-TTTATAAACAGAAATACTAGA
right  -----ACAATAGACCTAAAAGAAAGGGTCAAAT-TTTATAAACAGAAATACTAGA
left   111111111111111111111111111111111111111111111111111111111111111111111111111111111111
right  *2*222222*22*2**222222222**2**2*222222*2**2222**2**2222**2**2222**2*2222**2

```

```

left   GGCCGAGGCGGGCGGAT-----CACGAGGTCAGGAGATCGAGACCATC---CTG-----GCTA
chrom  GACAATACTGAACTGAAAAATACAAACAGGAAGCTTCAACATAGGCTCCCTCACACTGAAGAATCAGTGA
right  GACAATACTGAACTGAAAAATACAAACAGGAAGCTTCAACATAGGCTCCCTCACACTGAAG-----
left   *2*222222*22*2**222222222**2**2*222222*2**2*222**2**222**2**222**222 1NN1

```

```

left   ACACGGTGAAACCCCATCT-----CTACTAAA
chrom  ACTTGAAGATAGAACATCTGAAATTATCCAATCAGAGCTGCAAAATAAA
right  -----
left   11NN1NN11N1NNN11111 1N1N11111

```

Other Simple Repeat Low Complexity DNA LTR LINE SINE

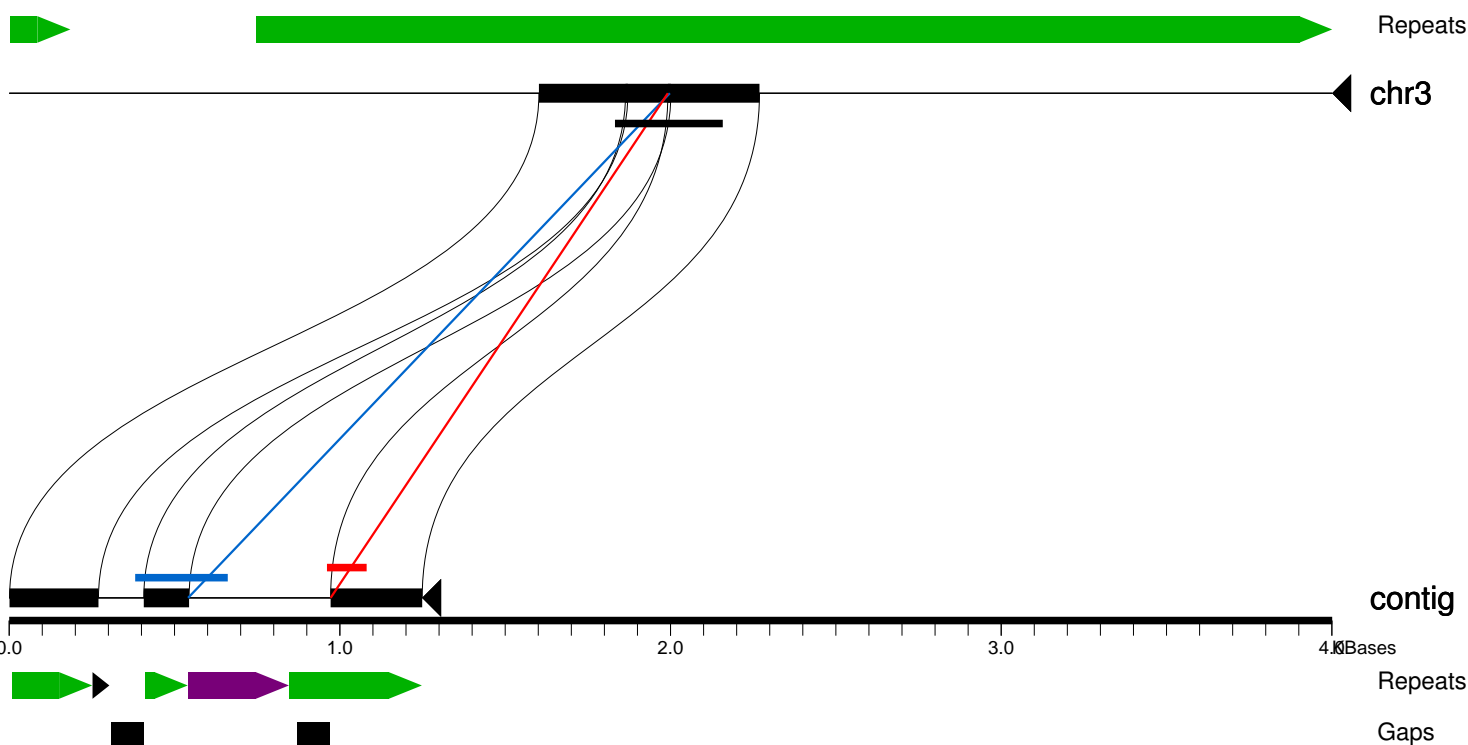

siteID: chr3\_42898383 Scafftig4 - Breakpoint: chr3:42898408

chr3:42898361-42898467

Overlap Length: 10 INS size: 317 Genotyped: Yes

```
left AA----GTCTCTCTCTCTC-----CCTGTCTTTCT--CCTGGAACACACTACAGGTTTGAGCCTAATTT
chrom AA----GTCTCTCTCTCTC-----CCTGTCTTTCT--CCTGGAACACACTACAGGTTTGAGCCTAATTC
right CCACCCGCCTCGGCCTCCCAAAGTGCTGGGATTACAGGCGTGAGCCACCGCGCCCGGCCGAGCCTAATTC
      1111111*1***111***1*111111*11*11**1*111*1**111***111*11*111*****2
```

```
left TTTTTTTTTTTTTTTTTTTTTTTTTTTTTTTTTGAGACGGAGTCTCGCTCTGTCGCCAGGCCGGA
chrom TTAGTTCATGACATACTTGTATC-----ACTG-GTTT--ATGTGAAGCTCTCATCA-A
right TTAGTTCATGACATACTTGTATC-----ACTG-GTTT--ATGTGAAGCTCTCATCA-A
      **22**22*2222*22**2*2*22222222**2*2**2*222*2**22**2*2222*22*
```

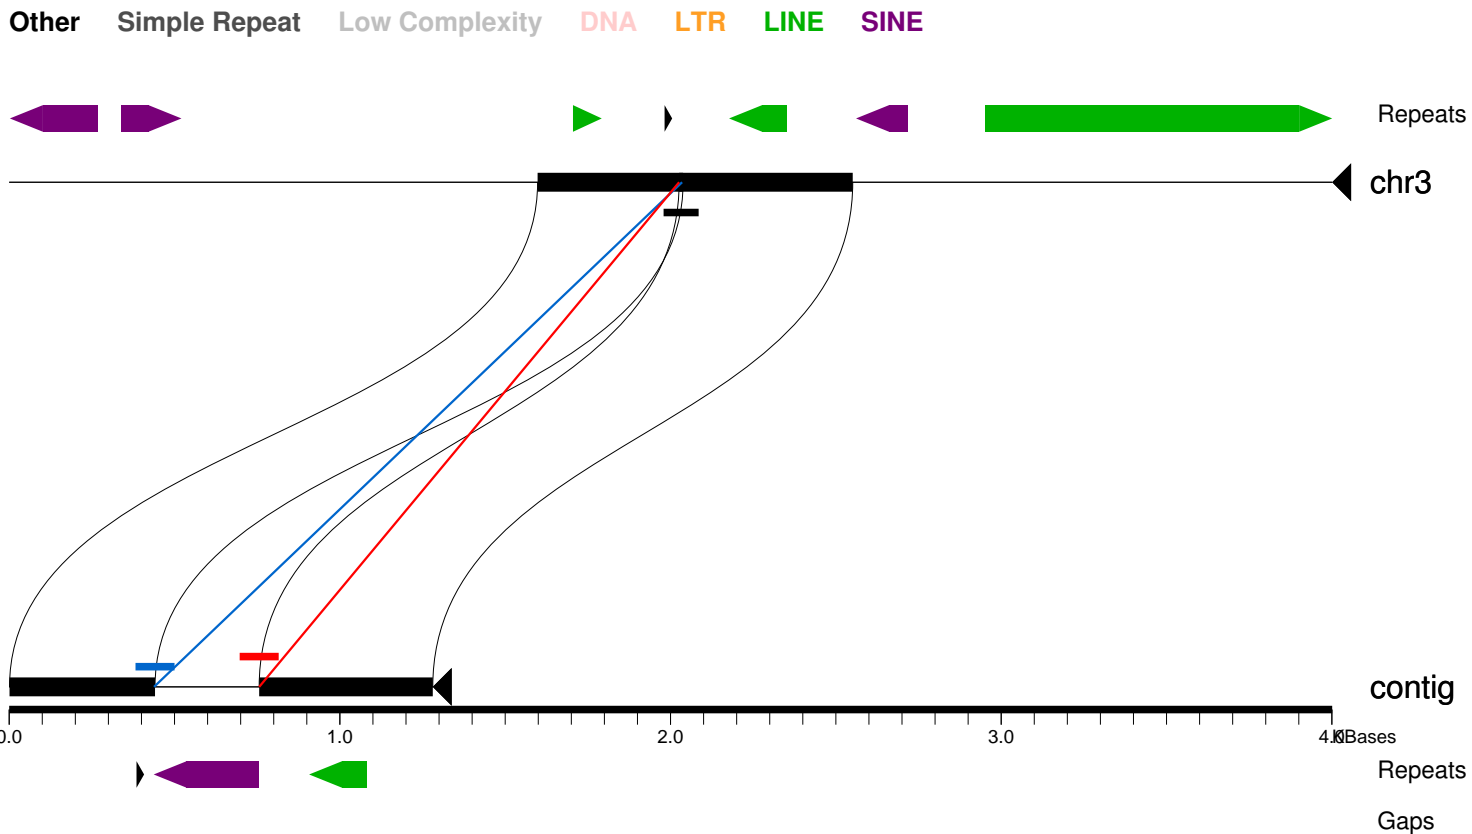

siteID: chr3\_45542661 Scaffitig13 + Breakpoint: chr3:45542653

chr3:45542603-45542712

Overlap Length: 10 INS size: 308 Genotyped: Yes

```
left  -----TAAAAATTACATATTTAATGTATTTAAAGAATGGTACAACACATTAAATATGGAATTTTTF
chrom -----TAAAAATTACATATTTAATGTATTTAAAGAATGGTACAACACATTAAATAFGGAATTTTFA
right  CCGCCCGCCTCGGCCTCCCAAAGTGTGGGATTACAGGCGTGAGCCACCGCGCCCGGCCFGGAATTTTFA
      1111111111*111111*11**1*1*11111*1***11*1*11**111**1*1*111111111******2
```

```
left  TTTTTTTTTTTTTTTTTTTTGGAGACGGAGTCTCGCTCTGTGCGCCAGGCTGGAGTGCAGT
chrom TATATGAACATACAT-----GCCCACTC---CTCAGTTTAAGAAACAG-AGTATTTTC
right TATATGAACATACAT-----GCCCACTC---CTCAGTTTAAGAAACAG-AGTATTTTC
      *2*2*22222*222*22222*2*22*2**222***2**22222*22*2*2***22222
```

Other Simple Repeat Low Complexity DNA LTR LINE SINE

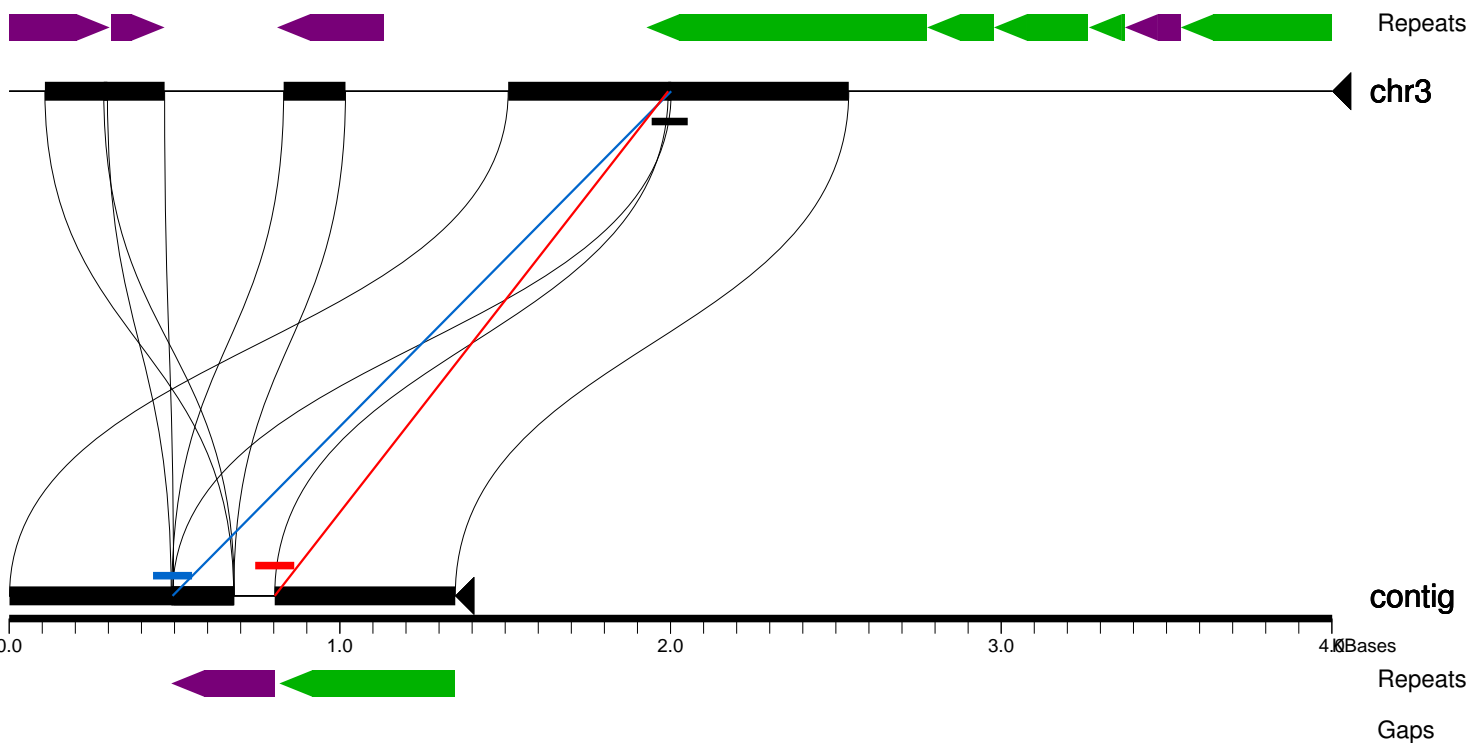

siteID: chr3\_46550782 Scaffitg1 + Breakpoint: chr3:46550792

chr3:46550632-46550966

Overlap Length: 15 INS size: 157 Genotyped: Yes

```
left -----ATGTGAAGTCCTAA
chrom TCATAAATTGAACCATTCTAAGTCAGGGGCCATCTGTATATAGGTTTATAAGGGGAATGTGAAGTCCTAA
right TT-----CCG-----GCCGGGCGCGGT-----GGTTCACGCCTGTAATCCCAGCAC-----
2N          22N          2N2N22N22N2          2222N2NNNNN2N2**111*111*1111

left TTAGGGAAAAGGAGTCAGGCTGGTGGGACCAGGGGAAAACAAAGAGATAAAGCAAATGAGCTA--TAGGT
chrom TTAGGGAAAAGGAGTCAGGCTGGTGGGACCAGGGGAAAACAAAGAGATAAAGCAAATGAGCTA--TAGGT
right TTTGGGAGGCCGAG----GCGGGTGGATCATGAGGTCAGGAGATCGAGAC--CATCCTGGCTAACAAGGT
**1***1111**1111**1*****11*11*1**11*11*1*11**1*111**11111***111****

left CTGCCTTTTTT-ATGGCCAGGACATATGGCCATATGATCATATGATTTTGGCCATAT-GATGGCCAAAA
chrom CTGCCTTTTTTTTATGGCCAGGAACATATGGCCATATGTCC-----TGGGCCATAAAGATAAGTCTTT
right GAAACCCCATCTCT-----ACATATGGCCATATGTCC-----TGGGCCATAAAGATAAGTCTTT
1111*1111*121*11111111******22*22222222*2*****22***22222222

left GATCATT---TCCGGCCGGGCGCGGTGGTTACAGCCTGTAATCCAGCACTTTGGGAGGCCGAGGCGGGT
chrom TATCCCTAAGTCACTCCTATCTCCTTTAGTTACAAGATTTATCTGTGCAGGACATATGGCC-ATATGTCT
right TATCCCTAAGTTACTCCTATCTCCTTTAGTTACAAGATTTATCTGTGCAGGACATATGGCC-ATATGTCT
2***22*222*1222**222*2*22*222*2**22222*2***222***22222222****2*222*22*

left GGATCATGAGGTCAGGAGATCGAGACCATCCTGGCTAACAAAGGTGAAACCCCATCTCTACATAT-----
chrom TG---ATGACGTACATAAATCAAAAAATTCCTG-CTTACCATCAAATGCCTCAATTTATCAAAACTCCG
right TG---ATGACGTACATAAATCAAAAAATTCCTG-CTTACCATCAAATGCCTCAATTT-----
2*222***2*2222*22**2*2*222****2**2*2*2222*22**2*2*22*2NN1N1N
```

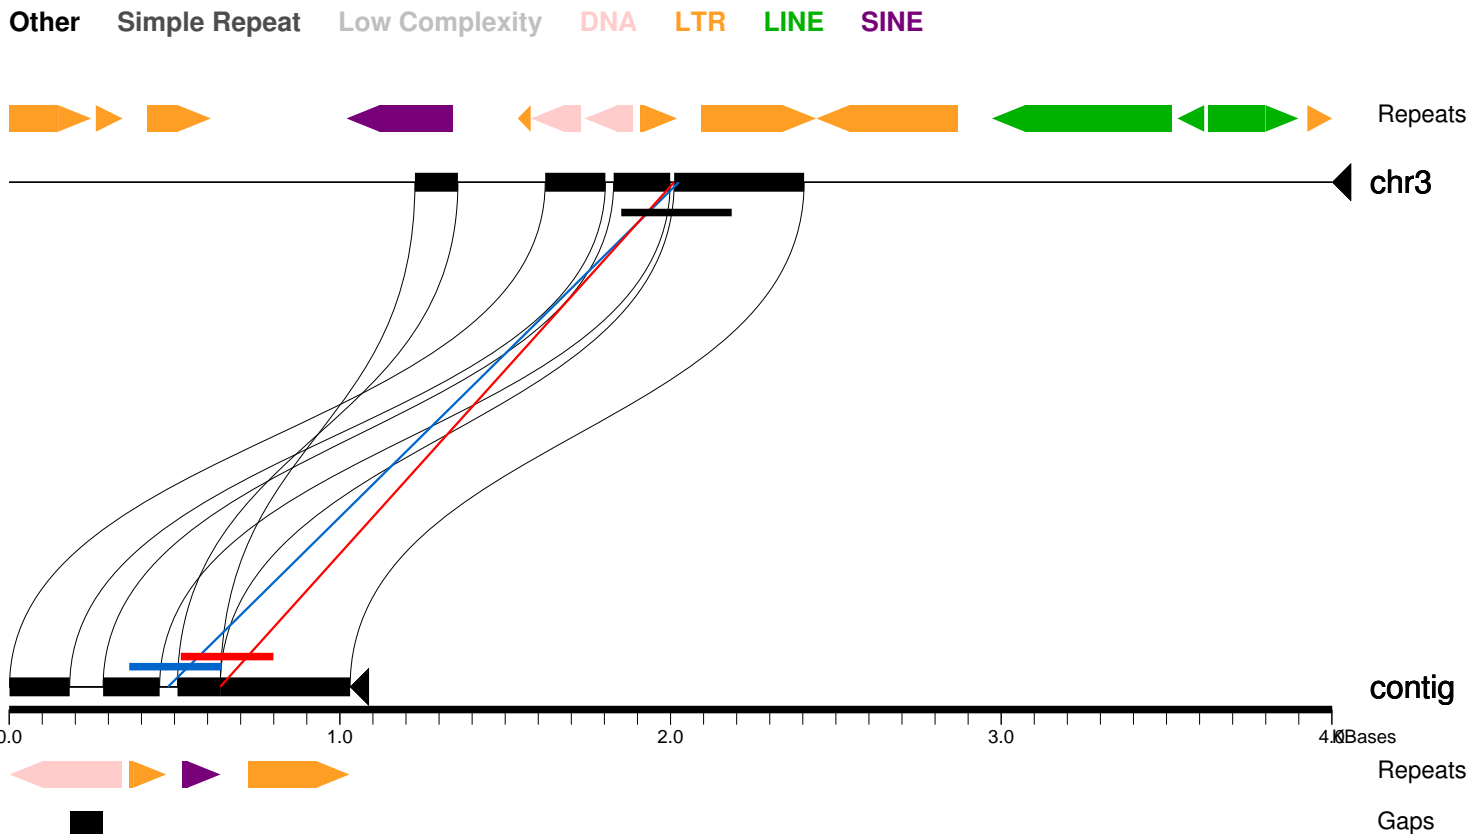





siteID: chr3\_50879176 Scaffitg1 + Breakpoint: chr3:50879160

chr3:50879000-50879335

Overlap Length: 16 INS size: 324 Genotyped: Yes

```
left -----AAGATGTGCATTTATCTATTTTTTTTCAAAAAATACTATTGTGTCTCTTATTGAACATGAC
chrom GTTTTAAGGAAAGATGTGCATTTATCTATTTTTTTTCAAAAAATACTATTGTGTCTCTTATTGAACATGAC
right TTT---AGTAGAGACGGGGTTTCACCT-TGTTAGCCAGGA-----TG-GTCTCGATCT---CCTGAC
N22 22N21***1*1*11**1*1**1*1**111**11*11111111**1*****1111*111*1****
```

```
left ATTGTGATTTTAATATTCTCTTATGCTTTGTTTTAGGTTGGTAC-AGAGGAGTTTCAACAAAGAAGCCAA
chrom ATTGTGATTTTAATATTCTCTTATGCTTTGTTTTAGGTTGGTAC-AGAGGAGTTTCAACAAAGAAGCCAA
right CTCATGATCC----ACCCGCCTCGGCCTCCCAAAGTGCTGGGATTACAGGCGTG-----AGCCAC
1*11**11111111*11*1*1*11**1*111111111*1**1*11*1**1*111111111111*****1
```

```
left ATGTGAAGGTAATGAAAAGTTTATTGTTACCTTTTCCTTTT-----CTTTTTTTTTTTTTTTTT
chrom ATGTGAAGGTAATGAAAAGTTTATTGTTACCTTTTCCTAATGTAGGAAGGAACCTACCTTGTATGTTTGT
right C-GCGCCCG-----GCCATTGTTACCTTTTCTAATGTAGGAAGGAACCTACCTTGTATGTTTGT
11*1*111*1111111111*11*****22*222222222222*2**2*2*2***2**
```

```
left -----TTTTTTTTTTTTTTTTTTTGGAGACGGAGTCTCGCTCTGTCG--CCCAGGCCG
chrom GATATAACAACCTCTTAGTGGTTTCATCTTTTAATCTTTTACA-GTAGCCACAATGATTCTTTTCTTTTACAA
right GATATAACAACCTCTTAGTGGTTTCATCTTTTAATCTTTTACA-GTAGCCACAATGATTCTTTTCTTTTACAA
22222222222222222222**22*2***22*2***2*2*2*2**2*2*22*222**222**2222*22
```

```
left GACTGCGG---ACTGCAGT--GGCGCA--ATCTC-----GGCTCA-CTGCAAGCTCCGCT
chrom AACTGTAGCAAACCTCTTGTCTGTCTCAGCATATTTAAAGTGTTCCTTCTGAAAAGGACAG--
right AACTGTAGCAAACCTCTTGTCTGTCTCAGCATATTTAAAGTGTTCCTTCTGAAAAGGACAG--
2***22*222**222**22*2*2**22*2*22222*2211N 111N111NN1N122
```

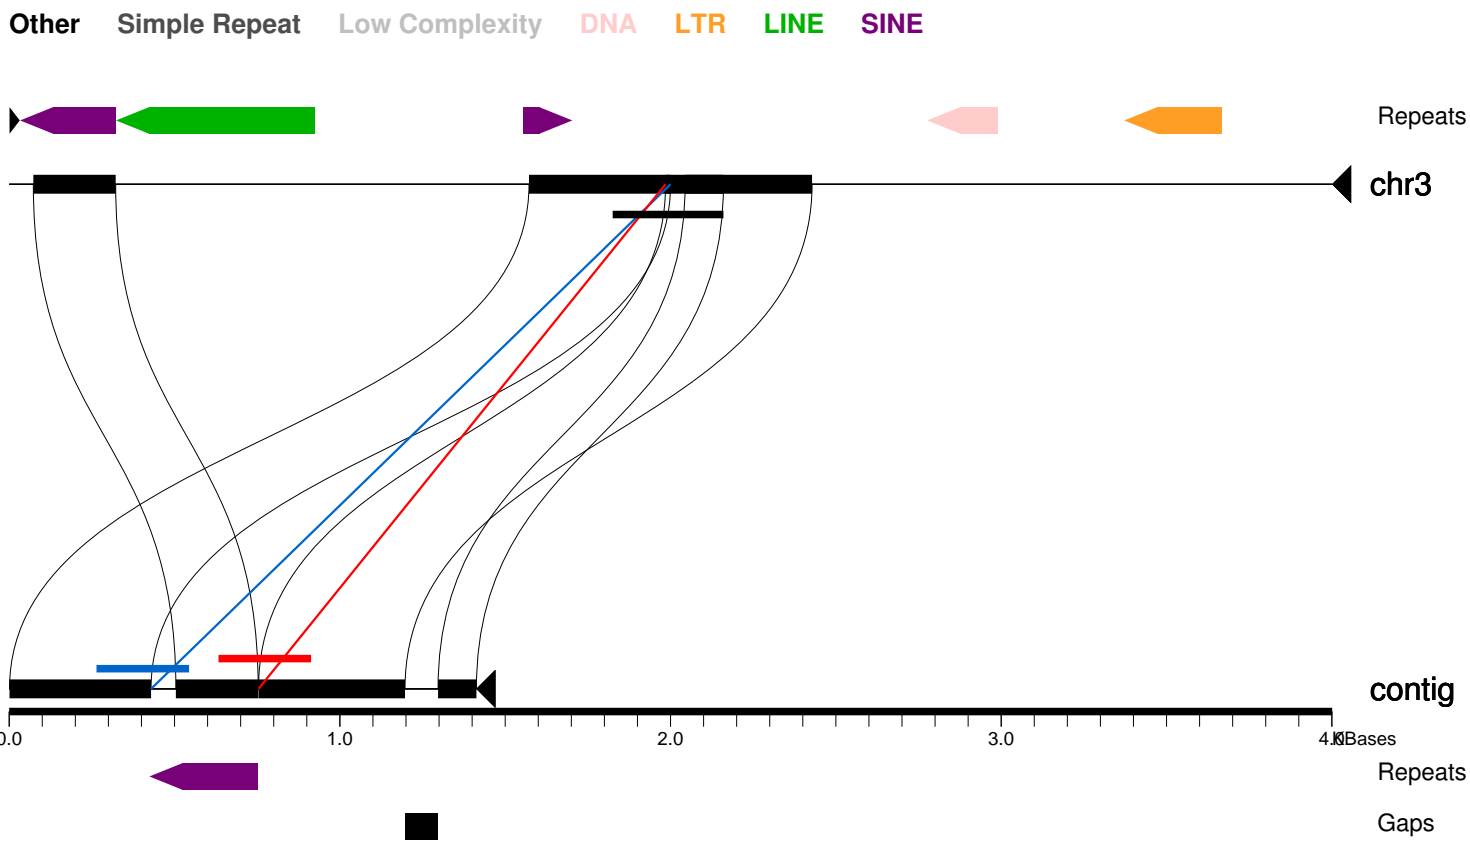



siteID: chr3\_55885202 Scaffoldig2 + Breakpoint: chr3:55885199

chr3:55885157-55885258

Overlap Length: 18 INS size: 294 Genotyped: Yes

```
left  G-----ACCTTGGGAAGAAAACTTACTTCCATCTC-----TAAGAAAAAATA-----CTAGATAATGA
chrom G-----ACCTTGGGAAGAAAACTTACTTCCATCTC-----TAAGAAAAAATA-----CTAGATAATGA
right TCCGCCCCGCTCGGCCTCCCAAAGTGCTGGGATTACAGGCGTGAGCCACCGCGCCCGGCCTAGATAATGA
      111111111***1**1111111**11*1**111**11*11111*1**11*111111111111*****

left  TTTTTTTTTTTTTTTTTTTTTTTTGGAGACGGAGTCTCGCTCTGTGCGCCAGGCTG-GAGTGCAGTGGCGG
chrom TTTTTTTTAAAGCCCATGCTG-----GGAG-----TTGGTGG--CAGGATGAGAATGCACATG---
right TTTTTTTAAAGCCCATGCTG-----GGAG-----TTGGTGG--CAGGATGAGAATGCACATG---
      *****12222222*22*22222222*****222222*22**2*22*****2**2**2*****222*222
```

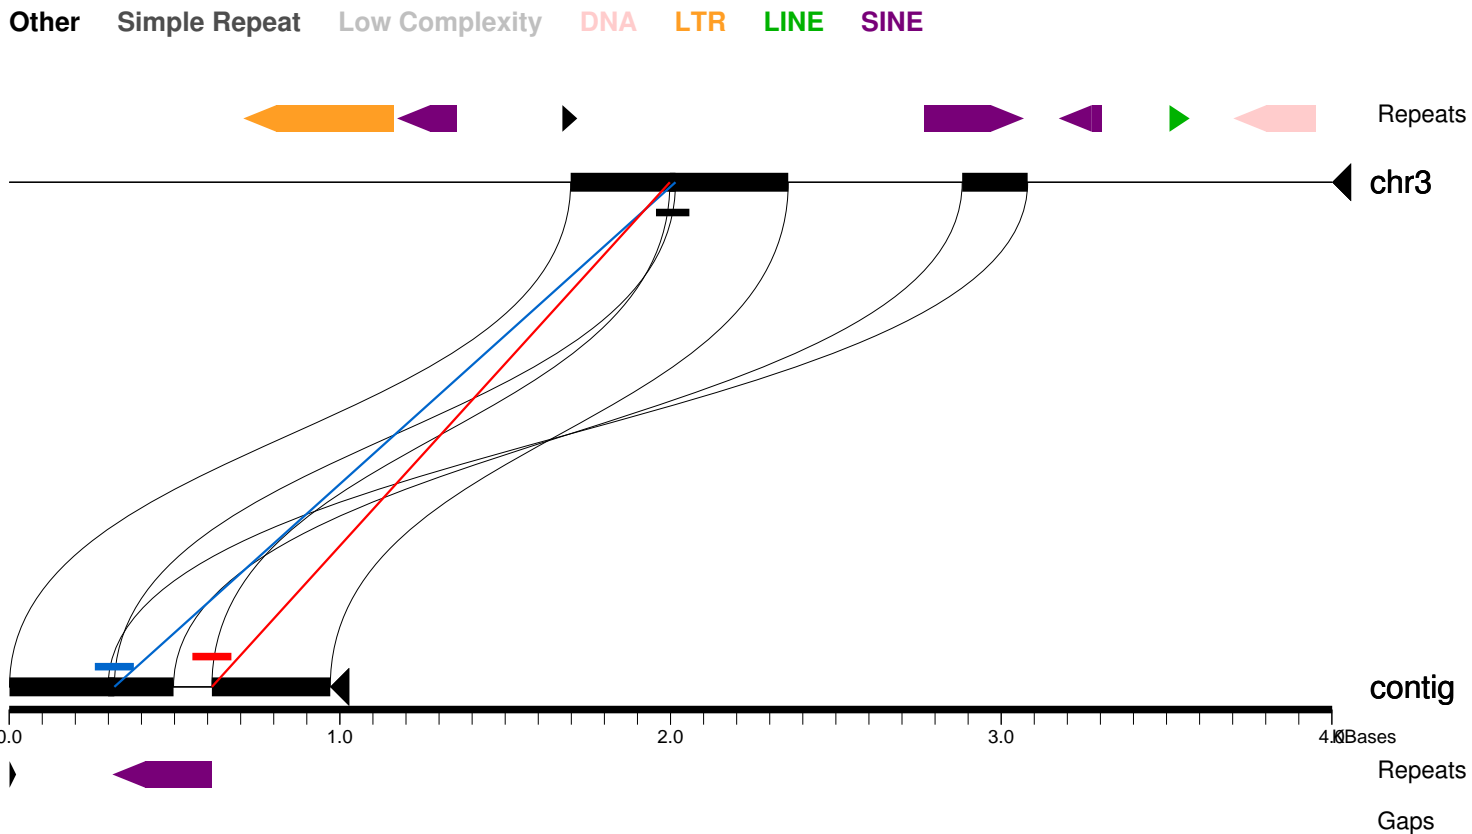

siteID: chr3\_6103031 Scaffitg1 + Breakpoint: chr3:6103035  
 chr3:6102875-6103206  
 Overlap Length: 12 INS size: 437 Genotyped: No

```

left -----CTCGGAAAGCTGTGGATATGTGCTTTACTAAAA
chrom AAGAAAAATCTCAGACATTTTTACTTTTCGGAAACTTTCTCGGAAAGCTGTGGATATGTGCTTTACTAAAA
right TTTAGTAGAGACGGGG--TTTCACCTTG-----TTAGCCAGGATGGTCTCGATCTC--CTGACCTCAT-
NNN2NN2NNNN2N2NN 222N22N22N 22N11*1*1*1*1*1***1*111**111*1*1
  
```

```

left TGGGGGAACAAATCAAGACAAAAGAAAAACATCCTATTCAAGAAACAGAGCATTTCTCGAGGGGGAAGTTCA
chrom TGGGGGAACAAATCAAGACAAAAGAAAAACATCCTATTCAAGAAACAGAGCATTTCTCGAGGGGGAAGTTCA
right -----GATCCACCCGCTC---GG---CCTCC----CAAAGTGCTGGGATTAC---AGGCGTGAGCC--
11111**1*1*11*1111*111**1111*1***1111**1111*1*1*11*1*111***1*11**1111
  
```

```

left GTTGATGGTGACAGAAAGACCCAGGATGGAA*NNNNNNNNNNN-----
chrom GTTGATGGTGACAGAAAGACCCAGGATGGAA*CTTTATAGCAGGCCACGGAGACACCAGTCCCATTGTGG
right ----ACCGCGCCCGG-----CAGGATGGAA*CTTTATAGCAGGCCACGGAGACACCAGTCCCATTGTGG
1111*11*1*1*1*111111******1*2222222222222222222222222222222222222222
  
```

```

left -----
chrom AACAGAAGGACAAAAGGCTCCAGGAGGAAGTTCTCCAAGGACAACAATTGAGATGATATAAAATGGCATAA
right AACAGAAGGACAAAAGGCTCCAGGAGGAAGTTCTCCAAGGACAACAATTGAGATGATATAAAATGGCATAA
222222222222222222222222222222222222222222222222222222222222222222222222
  
```

```

left -----
chrom CGGAAAAACCATATGGAGAGGCTTTTGATGTTGCATGTATTTTGAATGTTTT
right CGGAAAAACCATATGGAGAGGCTTTTGATGTTGCATGTATTT-----
22222222222222222222222222222222222222222222222222222222
  
```

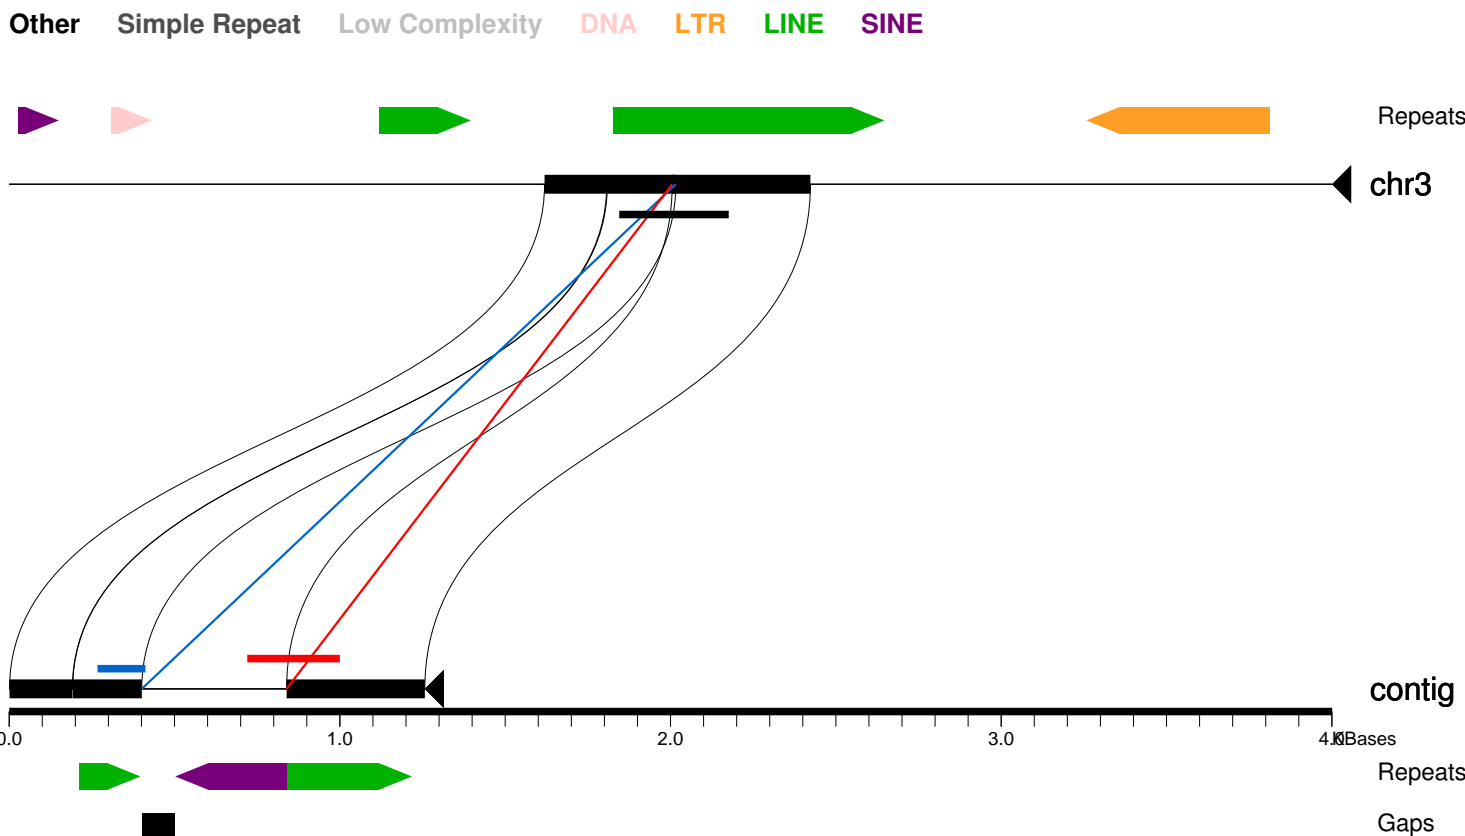

siteID: chr3\_61973380 Scaffitg1 - Breakpoint: chr3:61973380

chr3:61973335-61973439

Overlap Length: 15 INS size: 195 Genotyped: Yes

```
left   TTT-----AGATTCCATAATTTGGATTTACAAACTCAATTGTGGCTAAGTAAAA-TTCCTAT
chrom  TTT-----AGATTCCATAATTTGGATTTACAAACTCAATTGTGGCTAAGTAAAA-TTCCTAT
right  CCTGGGCGACAGAGCGAGACTCCGTCTCAAAAAAAAAAAAAAAAAAAAAAAAAAAAAAATAAAATTCCTAT
      11*1111111111111111***1***1*11111111*111*1***111**11111111**11***1*****
left   TTTGTACAAAAAATTAGCCGGGCGCGGTGGCGGGCGCCTGTAGTCCCAGCTACTCGGGAGGCT
chrom  TTTGGTCAGCCATCTAATAAATCAA-----CAATCAC-TTTATTTG--GTTTTTCAA-----
right  TTTGGTCAGCCATCTAATAAATCAA-----CAATCAC-TTTATTTG--GTTTTTCAA-----
      ***22**222*22**222222*2222222*222*2*2*2**2*2222*2*22**22222222
```

Other Simple Repeat Low Complexity DNA LTR LINE SINE

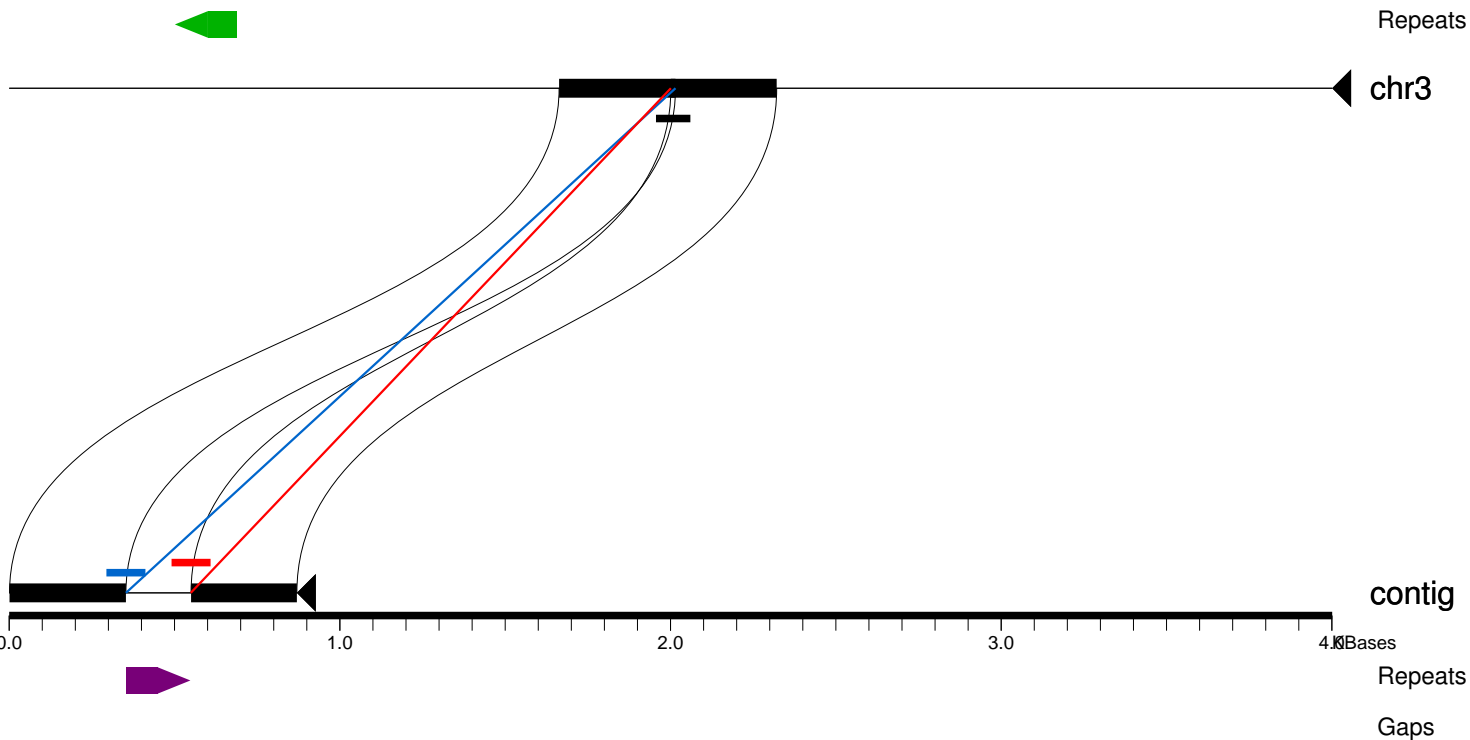

siteID: chr3\_63540963 Scaffoldig2 + Breakpoint: chr3:63540951

chr3:63540906-63541010

Overlap Length: 15 INS size: 297 Genotyped: Yes

```
left  -----GACATCTAACAGATCCGTTTTTAAAGGGATTGAGTTTT---GTTTAGTAAGAAAAACACT
chrom -----GACATCTAACAGATCCGTTTTTAAAGGGATTGAGTTTT---GTTTAGTAAGAAAAATACT
right  CCACCCGCCTCGGCCTCCCAAAGTGCTGGGATTACAGGCGTGAGCCACCGCGCCCGCCAGAAAAACACT
      111111111111*1*1**11*1**11*1*111*1*11**11****1111111*1111*11*****N***
```

```
left  TCCTTTTTTTTTTGAGACGGAGTCTCGCTCTGTCGCCAGGCCGGACTGCGGACTGCAGTGGC
chrom TCCTAAGTATA---AGTTGGAATTTATGAGGTTTCGT-----GAAT---GGCTTTATCATC
right TCCTAAGTATA---AGTTGGAATTTATGAGGTTTCGT-----GAAT---GGCTTTATCATC
      ***222*2*2222**22***2*2*2222222***222222222**2*222*2**22*2222*
```

Other Simple Repeat Low Complexity DNA LTR LINE SINE

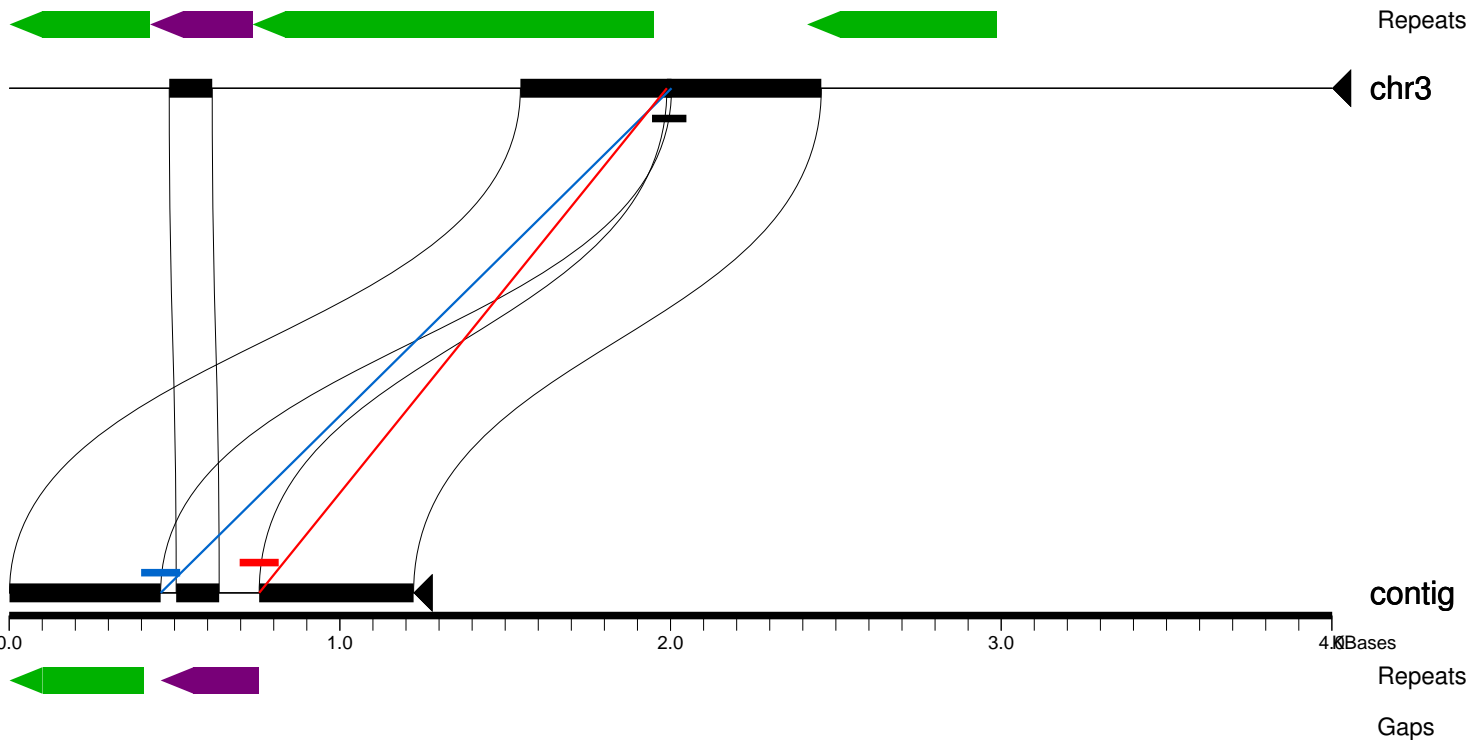

siteID: chr3\_6395813 Scaffitg1 - Breakpoint: chr3:6395820

chr3:6395774-6395879

Overlap Length: 14 INS size: 392 Genotyped: No

```
left  --AGC--AGAT--TCAAAAAAAGAGTAACTGAGACTCCTATCCGTCT--GACTT-----GATCTCAAAC
chrom --AGC--AGAT--TCAAAAAAAGAGTAACTGAGACTCCTATCCGTCT--GACTT-----GATCTCAAAC
right TTAGCCAGGATGGTCTCGATCTCCTGACCTCATGATCC-ACCCGCCTCGGCCTCCCAAAGGATCTCAAAC
      11***111***11**111*1111111*1**1*111***1*1***1**11*1**1111111*****
```

```
left  TCTTNNNNNNNNNNNNNNNNNNNNNNNNNNNNNNNNNNNNNNNNNNNNNNNNNNNNNNNNNNNNNNNNNNNN
chrom TCTTATCTACTATTCTATCTTCTTAAAGCTGATAATGCTCTGGCAAGTTT-----
right TCTTATCTACTATTCTATCTTCTTAAAGCTGATAATGCTCCGGCAAGTTT-----
      ***22222222222222222222222222222222222222222222222222222222222222222222
```

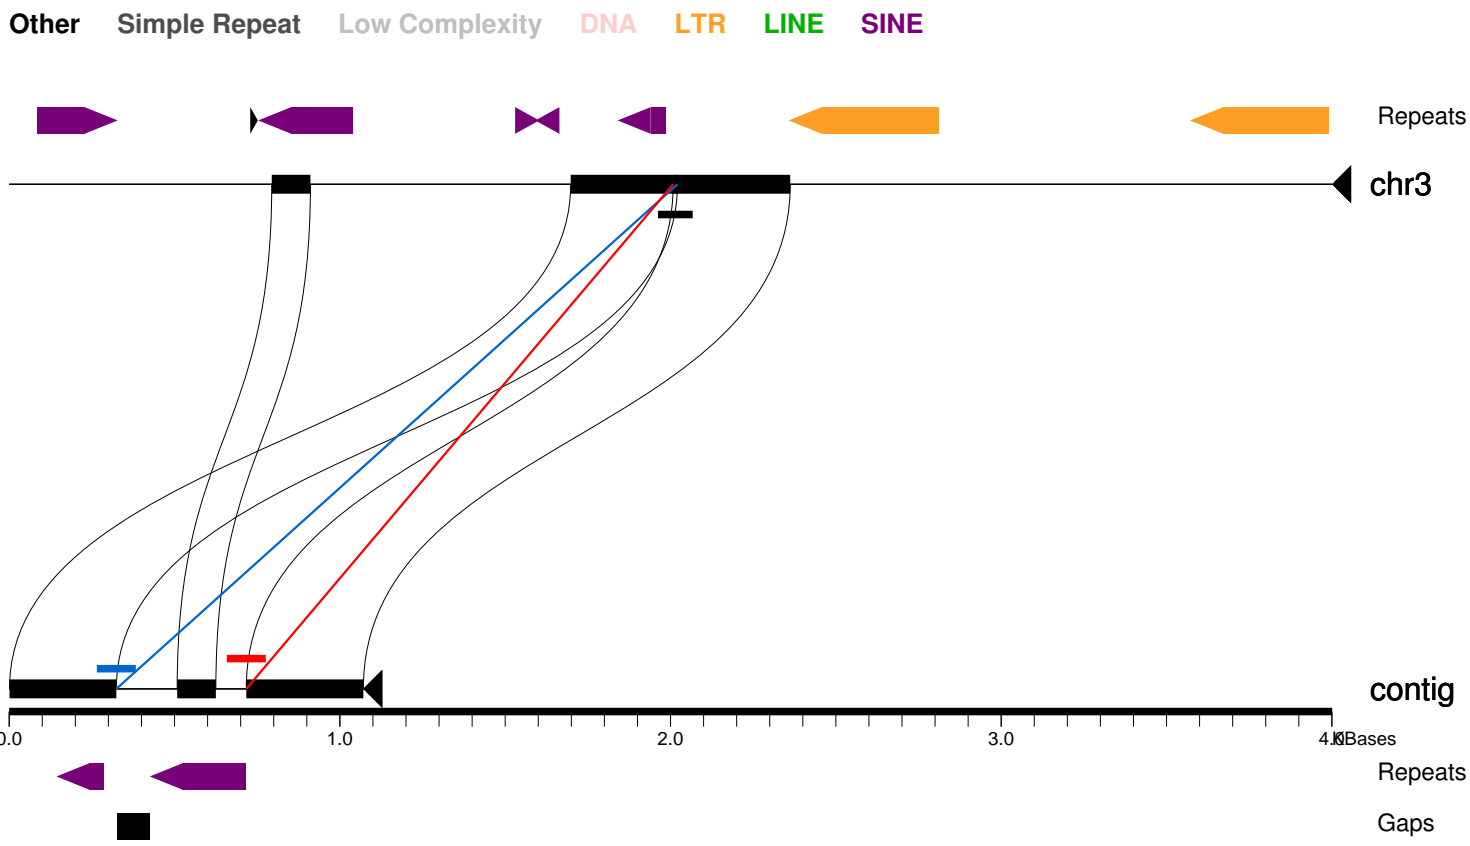

siteID: chr3\_6525442 Scaffitg1 - Breakpoint: chr3:6525398

chr3:6525352-6525457

Overlap Length: 14 INS size: 386 Genotyped: No

```

left  ACAGA-TATTATTCAG-----TTCAGTCCCTTAATGT--TTATTT-----TCTTTTTTTGGCCTTCTTT
chrom ACAGA-TATTATTCAG-----TTCAGTCCCTTAATGT--TTATTT-----TCTTTTTTTGGCCTTCTTT
right TCACCGTTTTAGCCGGGATGGTCTCGATCTCCTGACCTCGTGATCCGCCCGCCTCGGCC*GGCCTTCTTT
      1**111*1***11*1*11111*1**11**1*1*1*11*11*1**11111111**11111******
  
```

```

left  TTTTTTTTTNNNNNNNNNNNNNNNNNNNNNNNNNNNNNNNNNNNNNNNNNNNNNNNNNNNNNNNNNNNNNN
chrom TTTAT-----GAAGTGTTTTTATTTTTTTTTCATTGTCCTTCTATTATGTTTTTACT
right TTTAT-----GAAGTGTTTTTATTTTTTTTTCATTGTCCTTCTATTATGTTTTTACT
      **2*2222222222222222222222222222222222222222222222222222222222222222
  
```

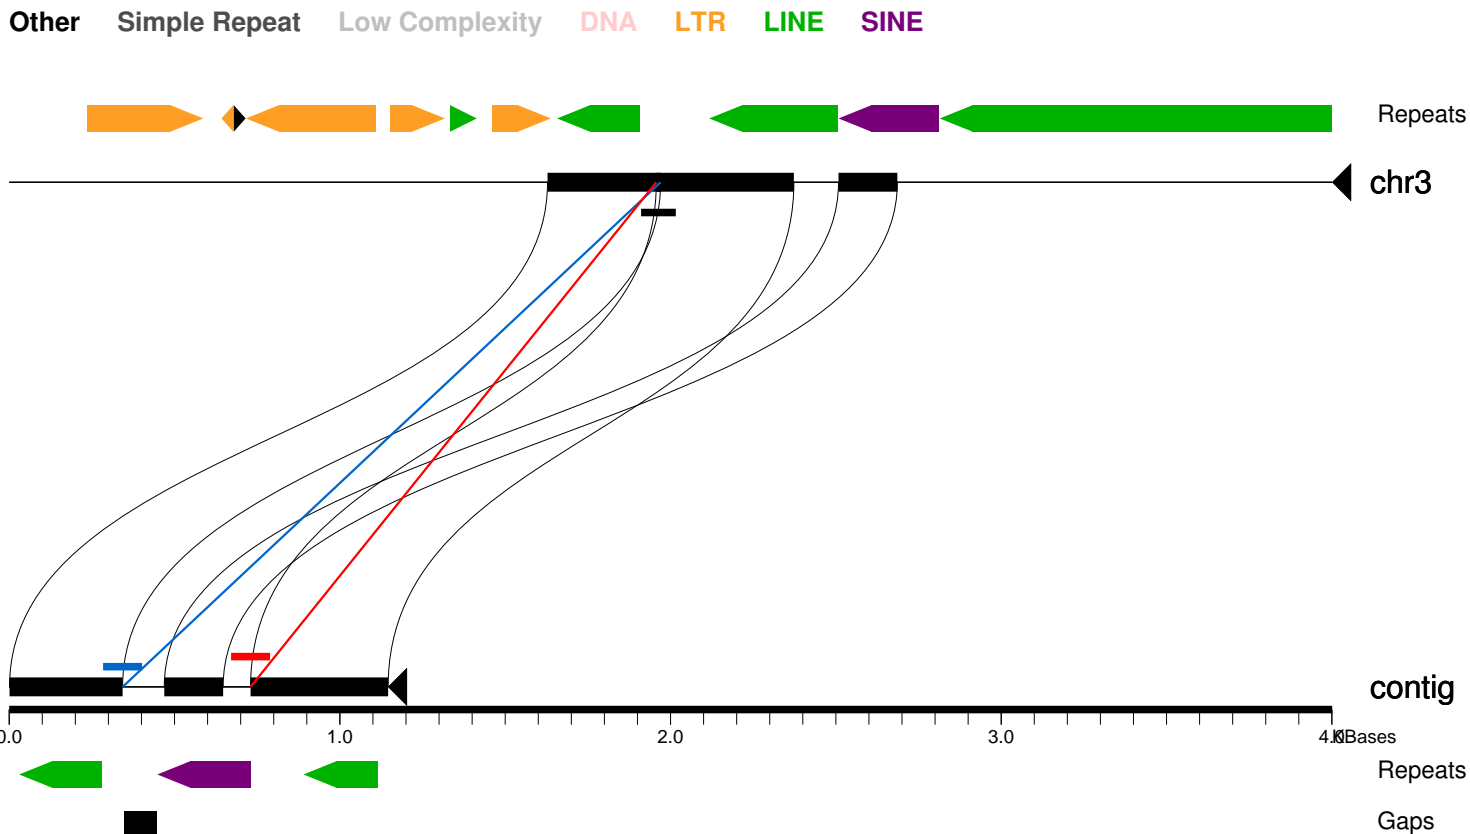

siteID: chr3\_6636948 Scaffitg1 - Breakpoint: chr3:6636917

chr3:6636883-6636976

Overlap Length: 15 INS size: 430 Genotyped: No

```

left  ----CAGGTGTATGATAACCTGCAGCTCTGTTGTTTTTG-----CTCATGATTGC
chrom ----CAGGTGTATGATAACCTGCAGCTCTGTTGTTTTTG-----CTCATGATTGC
right TCCGCCCCGCTCAGCCTCCCAAAGTGCTGGGATTACAGGCCGTGAGCCACCCGACCCGGCCTCATGATTGC
      1111*11*11*11*111**111**11***111**111*11111111111111111111111111111111******
  
```

```

left  TTTT TTTT TTTT TTTT NNNNNNNNNNNNNNNNNNNNNNNNNNNNNNNNNNNNNNNNNNNNNNNNNNNNNNNNNNN
chrom TTTTGCTTTT TTTT TTTTATTTGTGGCTCCATATAGATATTAAGATTGTTT-----
right TTTTGCTTTT TTTT TTTTATTTGTGGCTCCATATAGATATTAAGATTGTTT-----
      ***22*****2***222222222222222222222222222222222222222222222222222222222
  
```

```

left  NNNN
chrom ----
right ----
      2222
  
```

**Other**   Simple Repeat   Low Complexity   DNA   LTR   LINE   SINE

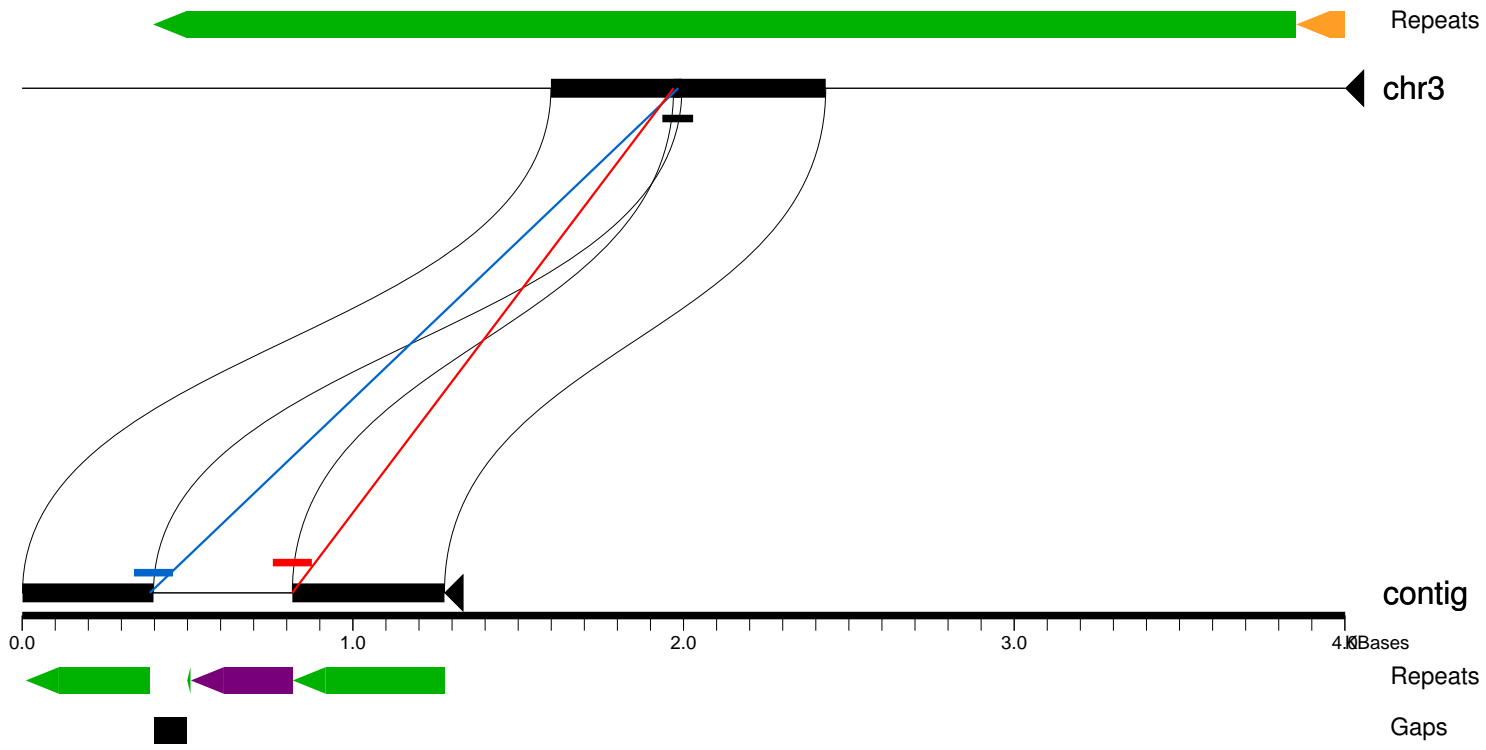

siteID: chr3\_66729524 Scaffitg1 + Breakpoint: chr3:66729520

chr3:66729465-66729579

Overlap Length: 5 INS size: 405 Genotyped: No

```
left   TTCTGTGGGCACTTTTGTTCAGATTCCT----TTTCTGCATCAATTGATATGATCATGTAATTTNNNNNNN
chrom  TTCTGTGGGCACTTTTGTTCAGATTCCT----TTTCTGCATCAATTGATATGATCATGTAATTTTCTTCT
right  CCGCCCGCCTCGGCCTCCCAAAGTGTCTGGGATTACAGGCGTGAGCCACCGCGCCCGGCCATTTTCTTCT
      111111*11111111*11**1*1*1**1111**1*1*11111*111*111111*11*11****222222
```

```
left   NNNNNNNNNNNNNNNNNNNNNNNNNNNNNNNNNNNNNNNNNNNNNNNNNNNNNNNNNNNNNNNNNNNNNNN
chrom  TTAGCCTATTAATATTTTCAGATTACAATGACTGATTTTTGAATATTGAA----
right  TTAGCCTATTAATATTTTCAGATTACAATGACTGATTTTTGAATATTGAA----
      22222222222222222222222222222222222222222222222222222222222222222222
```

Other Simple Repeat Low Complexity DNA LTR LINE SINE

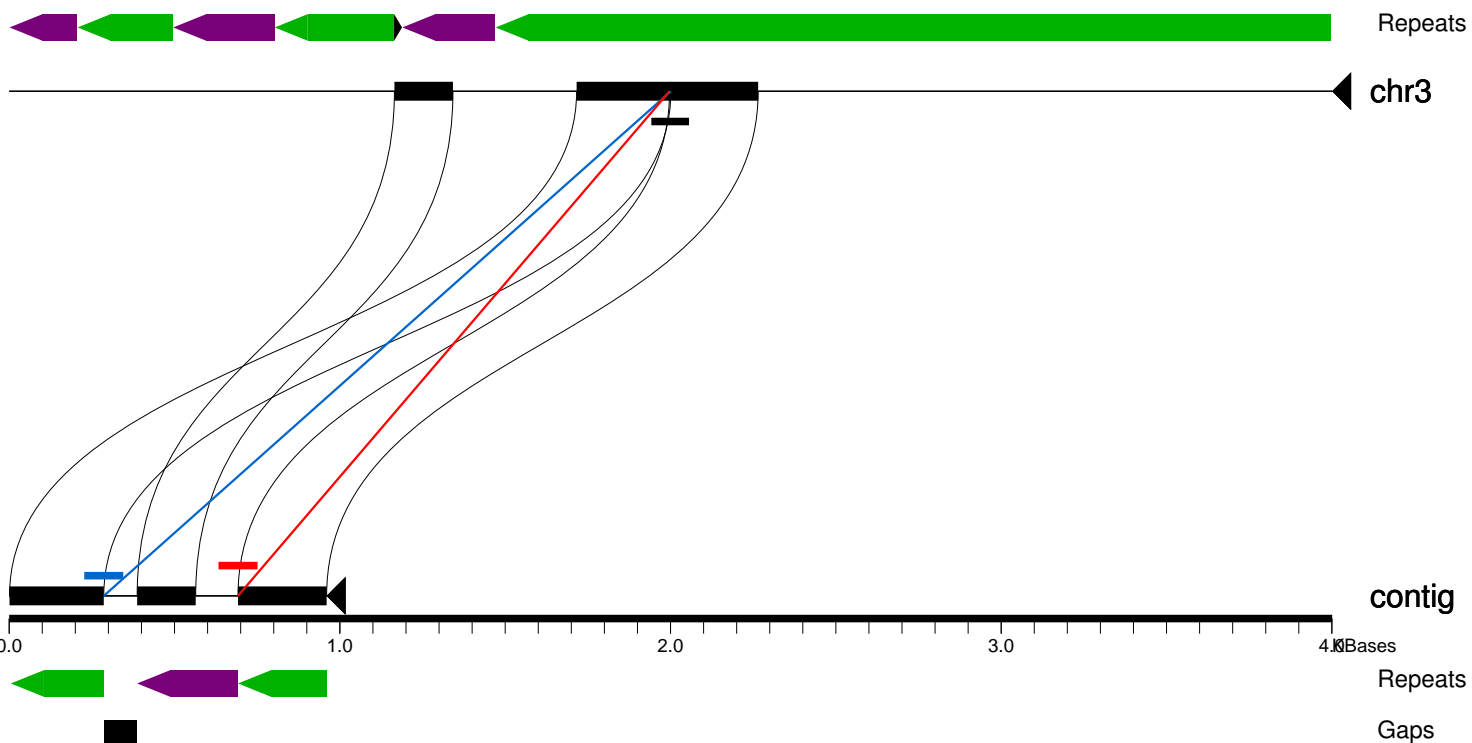





siteID: chr3\_67902949 Scaffitg1 - Breakpoint: chr3:67902945

chr3:67902785-67903114

Overlap Length: 10 INS size: 313 Genotyped: Yes

```
left      TT-----CCCTATCTCTAGAATTTTCAGATATGTAAGCCAGTAAATTTCTTGTGTGTTAAGCTG
chrom     TTAATTAGTCTTCCCTATCTCTAGAATTTTCAGATATGTAAGCCAGTAAATTTCTTGTGTGTTAAGCTG
right     C-----GTGAACCCGGGAAGTGGAGCTTGCAG-----TGAGCCG--AGATTGCGCCACTG-----CAG
11        22NNN***111111*1**11**1***11111*1****111*1***1*11111**111111*1*
```

```
left      GTTTGAGATGGGTTTTCTGTTCCTTGCCCTCCAAAGCCATCAAACCTCTCACATGGATATCAAATGTTATGT
chrom     GTTTGAGATGGGTTTTCTGTTCCTTGCCCTCCAAAGCCATCAAACCTCTCACATGGATATCAAATGTTATGT
right     TCCGCAGTCCGG-----CCTGGGTGACAGAGCGAG---ACTCCGTCTTAAAAAAAAAAAA-----
11111**111**111111111***1*1111**1***1*1111****111*1*11*1*11**111111111
```

```
left      TATATGTTAGAATTAGATATAAGAAGATACGGCCGGGCGCGGTGGCTCACGCCT---GTAATCCCAGCAC
chrom     TATATGTTAGAATTAGATATAAGAAGATACACCAGCAATTGAAATATGACAATTACAGAAATGCTATCAT
right     -----AAAAAAAAAAAGAAGAAACACCAGCAATTGAAATATGACAATTACAGAAATGCTATCAT
11111111111**11*1*1*1*1*****1*22*2*22222*22222*2**222*222*2***2*2*2**2
```

```
left      -----TTTGGG-AG-GCCG-AGGCGGGTGG----ATCATGAGGTC--AGGAGATCGAGACCATCC----
chrom     ATGACATTTGCGTAGTGTGTACAAGGGTTGCCAAAGCATTATGTGTAAACAAGCTCCTGATATTTTCAGTT
right     ATGACATTTGTGTAGTGTGTACAAGGGTTGCCAAAGCATTATGTGTAAACAAGCTCCTGATATTTTCAGTT
222222***N*2**2**2*2*222****2*2222*2***2*2**222*22**2**22**222*2*2222
```

```
left      -----TGGCTA---ACAAGGTGAAACC----CCGTCTCTACT---AAA
chrom     GTAAACTATGGCTATTGAAAAAGAGAAAAACATTGCCGAC-CAACATGGACC
right     GTAAACTATGGCTATTGAAAAAGAGAAAAACATTGCCGAC-CAACATGGAC-
22222222*****222*2**2*2**2**2*2222***2*2*2**2222*2N
```

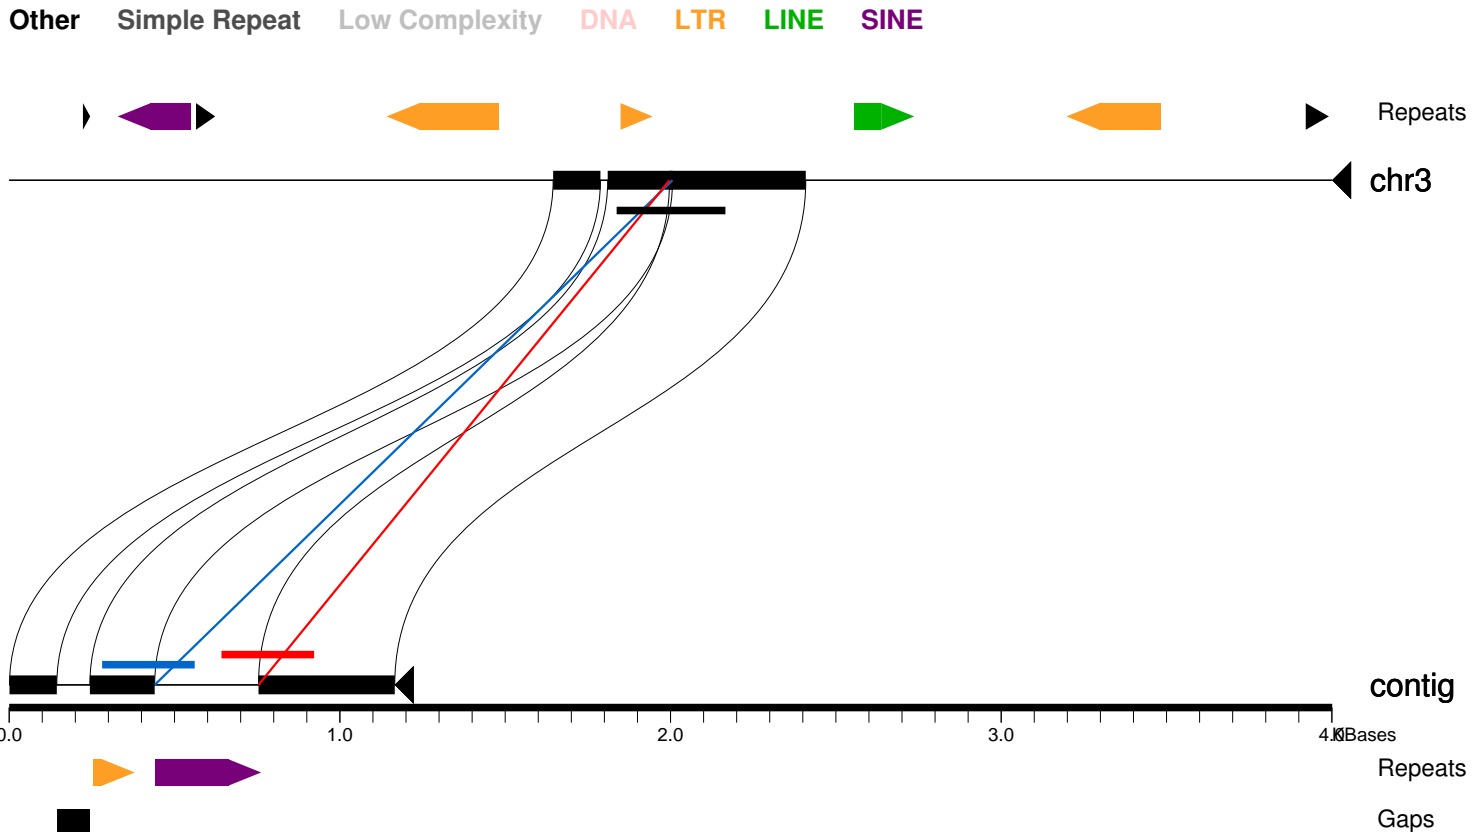

siteID: chr3\_68830364 Scaffitg1 + Breakpoint: chr3:68830336  
 chr3:68830297-68830395  
 Overlap Length: 21 INS size: 435 Genotyped: No

```

left  GACCAAGGGAAATTTACAAAAATAGATCCTTATATTCAA-----AAACAAGAAAG
chrom GACCAAGGGAAATTTACAAAAATAGATCCTTATATTCAA-----AAACAAGAAAG
right NNNNNNNNNNNNNNNNNNNNNNNNNNNNNNNNNNNNNNNNNNNNNNNNNNNNNNNNNNNA
1111111111111111111111111111111111111111111111111111111111111
* ** 1 *****

left  GTCCTAAGTTCGGCCGGGCGCGGTGGCTCACGCCTGTAATCCCAGCACTTTGGGAGGCCGAGGCGGGCGG
chrom GTCCTAAGTCAAAAACTTAAGAT---TC---CATATAA-CTTAAACTATATAAAG-----
right GTCCTAAGTCAAAAACTTAAGAT---TC---CATATAA-CTTAAACTATATAAAG-----
***** * 2222222222 * 2 * 222 * 222 * 2 * 2 * 2 * 2 * 2 * 2 * 2 * 2 * 2 * 2 * 2 * 2 * 222222222222
  
```

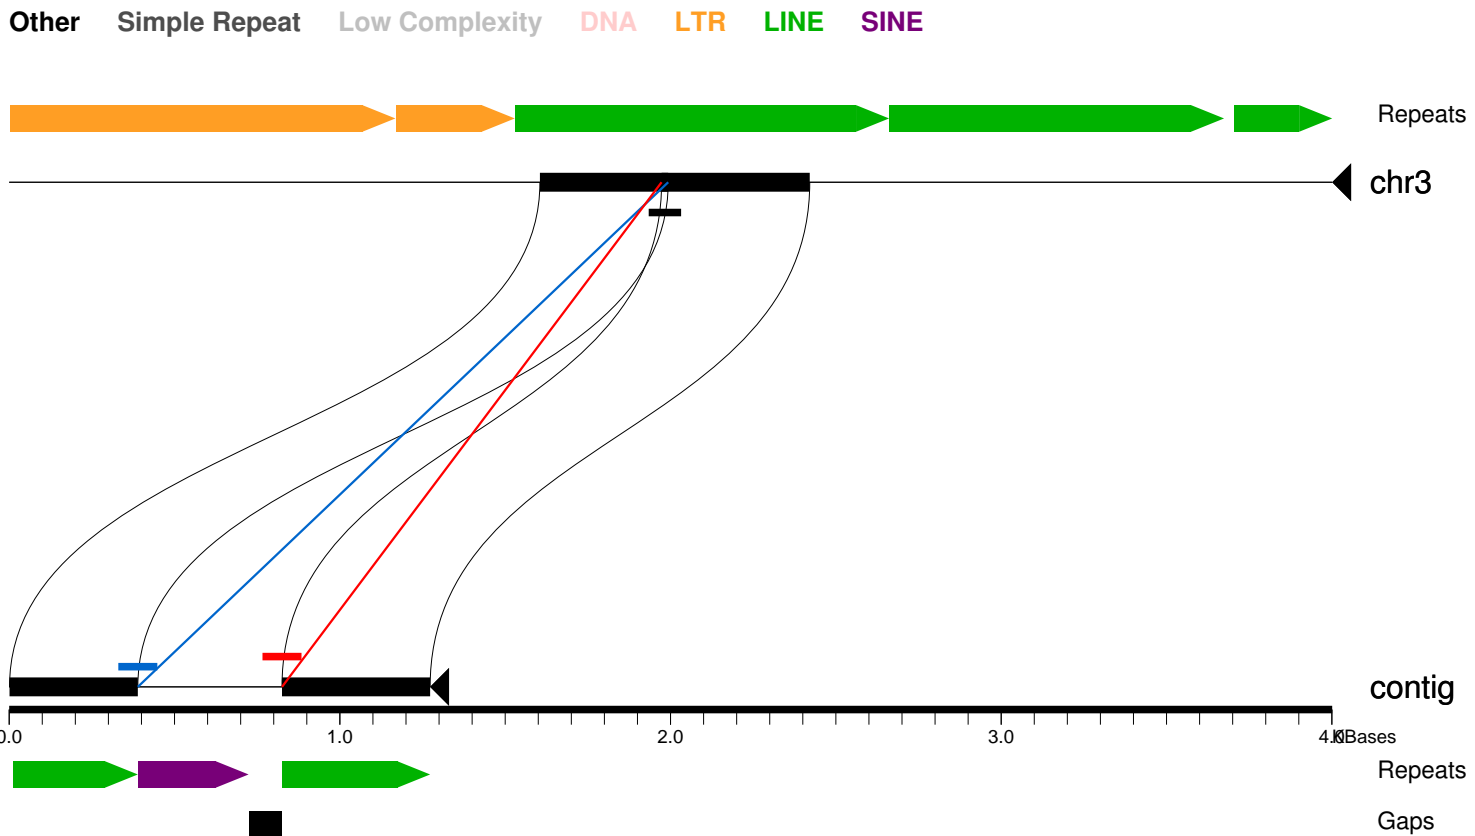

siteID: chr3\_7130368 Scaffitg13 + Breakpoint: chr3:7130371

chr3:7130326-7130430

Overlap Length: 9 INS size: 307 Genotyped: Yes

```
left TT-----TCTACCTCTAAAATT-----ATCTGAAGCCACAAGGACATTGGAGGTTCACTGATTTTT
chrom TT-----TCTACCTCTAAAATT-----ATCTGAAGCCACAAGGACATTGGAGGTTCACTGATTCT
right TCCACCCGCCTCGGCCTCCCAAAGTGCTGGGATTACAGGCGTGAGCCACCGCGCCCGGCCTCACTGATTTCT
*1111111111*11***11***1*111111*111*1**111*111*111*111*11*11*****2*
```

```
left TTTTTTTTTTTTTTTTTTTTTTGGAGACGGAGTCTCGCTCTGTCGCCAGGCCGGACTGCGGACTGCA
chrom TATTCATCG-----AAGCACCAGTGGTGCGA-GTTG----GAACGGCAGGGGTAAGAGG
right TATTCATCG-----AAGCACCAGTGGCGCGA-GTTG----GAACGGCAGGGGTAAGAGG
*2**22*222222222222**2222***22N**222**2*2222*22***222*2*2*22222
```

Other Simple Repeat Low Complexity DNA LTR LINE SINE

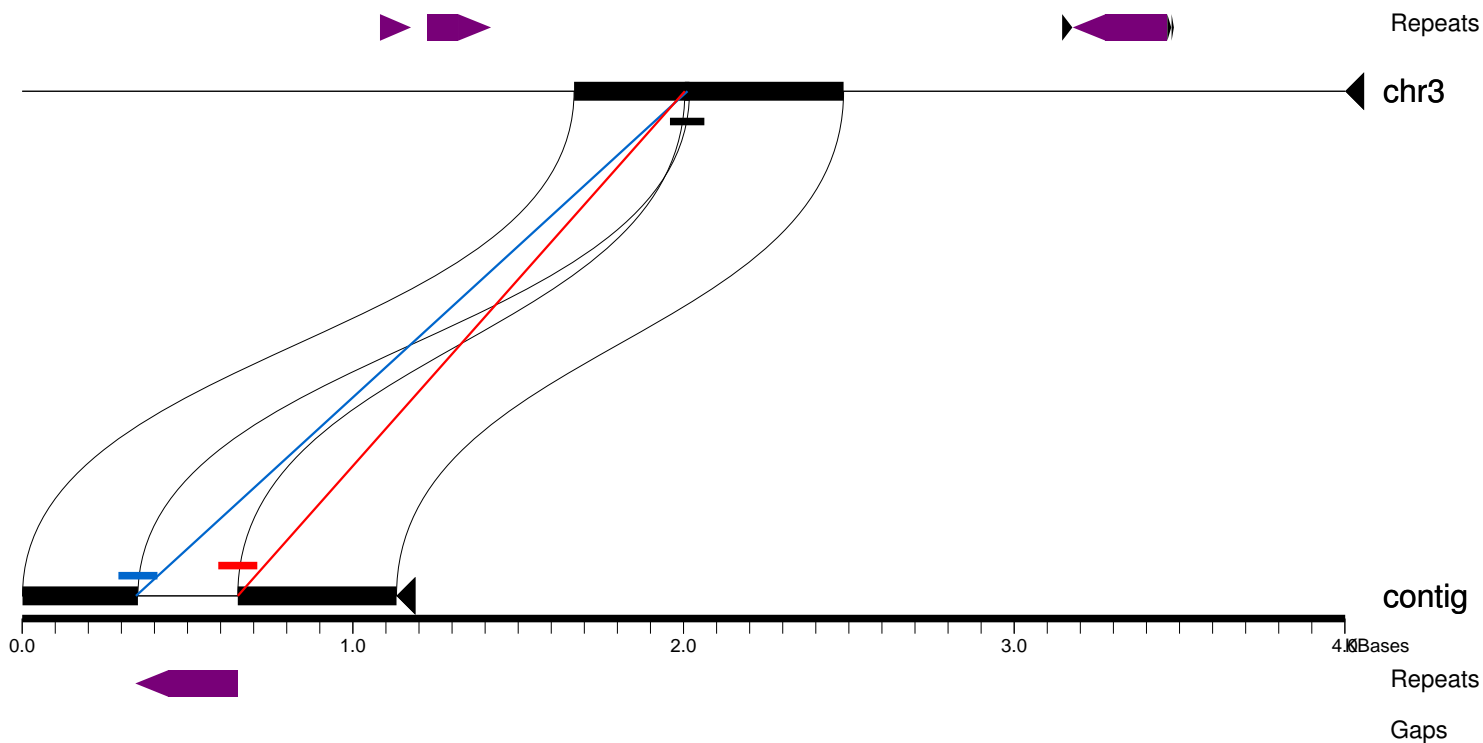



siteID: chr3\_76985877 Scaffitg5 + Breakpoint: chr3:76985871

chr3:76985711-76986043

Overlap Length: 13 INS size: 307 Genotyped: Yes

```

left      -----TATTTGTGGGAGCCAACACATTACAATTACCACTAACATGTTAACCTTAGTAGGTTT
chrom
right     CTGATAAATTAATTTATTTGTGGGAGCCAACACATTACAATTACCACTAACATGTTAACCTTAGTAGGTTT
           --GGAGAATGGCGTGAACCCGGGAGGCGGAGC-TTGCA-----GTGAGCCG-AG-----
           2NNN222NNNN*111111*****1*1111*1**1**1111111111111111**1*1**11**1111111

```

```

left      TCTTTATAAATACACATGTCTACTATATATAAAATGTTTCCAGATATGTAATTGGGATCATTCTTATAACA
chrom
right     TCTTTATAAATACACATGTTTACTATATATAAAATGTTTCCAGATATGCAATTGGGATCATTCTTATAACA
           -----ATCCCGCCAC-----TGCACTCCAGCCTGGGCGACAGA---GCGA---GACTCCGTCTCAAAAAA
           11111**11111***1111N*1*11*11*11111*1111*****111*21*111*11**11***1*1**1*

```

```

left      CTGATTGAGAAACTGGTTCTAAGAATTCATTTGGCCGGGC--GCGGTGGCTC-----ACGCCTGTAA
chrom
right     CTGATTGAGAAACTGGTTCTAAGAATTCATTTTATTTCACAACAGCAGTGGATATTTTTAGACTACAG-AG
           AAAAAAGAAAAAGAAAAAAAAGAATTCATTTTATTTCACAACAGCAGTGGATATTTTTAGACTACAG-AG
           111*11**1**1111111111*****222*222222**2***2*22222222**22*2*2*2

```

```

left      TCCAGCACTTTGGGAGGCCGAGGCGG-----GCGGATCAG--AGGTCA----GG
chrom
right     TAATTGCATTTTGGAGTCTTTAACTCAATTTTACTTTATTACATTCTGCCTTTAACCTTAGTTCCTTTTTGT
           TAATTGCATTTTGGAGTCTTTAACTCAATTTTACTTTATTACATTCTGCCTTTAACCTTAGTTCCTTTTTT
           *2222***2***2*222222*22*2222222222222222222222222222**222*2**222**2**2222212

```

```

left      AGATCGAGACCATCCTGGCTAA-----CACGGTGA--AACCCGTCTCTACTAAA
chrom
right     TAATTGAAAC--ACCTAGTTAAATATATACATTCTTATGAAGACATTTGTTTCTGA-
           TAATTGAAAC--ACCTAGTTAAATATATACATTCTTATGAAGACA-----
           22**2**2**222***2*2***2222222**222*2*22**22*2N1NNN1N1N12

```

Other    Simple Repeat    Low Complexity    DNA    LTR    LINE    SINE

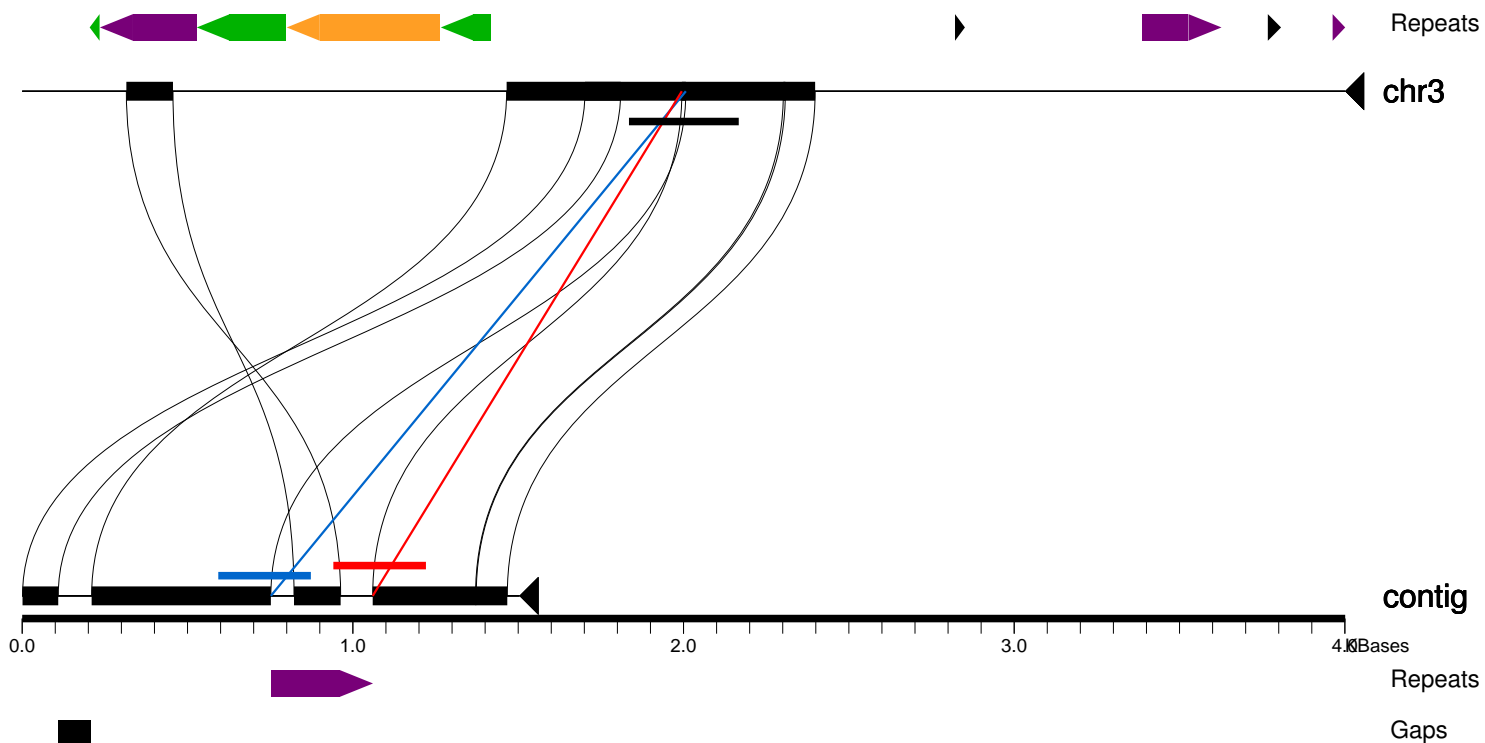

siteID: chr3\_80964885 Scaffitig4 - Breakpoint: chr3:80964876

chr3:80964823-80964935

Overlap Length: 7 INS size: 302 Genotyped: Yes

```
left    ---ATACCCAAATAAGGCT-----GAGAATTGTAGTTTACATATAAAAAATGTAATGGGTTTAAAAATTTGG
chrom   ---ATACCCAAATAAGGCT-----GAGAATTGTAGTTTACATATAAAAAATGTAATGGGTTTAAAAATTTAA
right   TGCAGTCCGCAGTCCGGCCTGGGCGACAGAGCGAGACTCCGTCTCAAAAAAAAAAAAAAAAAA--AAAAATTTAA
        111*11*11*1*11***111111**1*11111**11*1*1*1*1****111**1111111******22

left    --CCGGGCGCGGTGGCTCACGCCTGTAATCCCAGCACTTTGGGAGGCCGAGGCGGGTGG
chrom   TACCATCCACA-TAATTAATTCA--AAAACCAAACA---TAGCTGTAAAAATTTAAAT--
right   TACCATCCACA-TAATTAATTCA--AAAACCAAACA---TAGCTGTAAAAATTTAAAT--
        22**222*2*22*222*2*22*2222**2**2*2**222*2*22*2222*222222*22
```

Other Simple Repeat Low Complexity DNA LTR LINE SINE

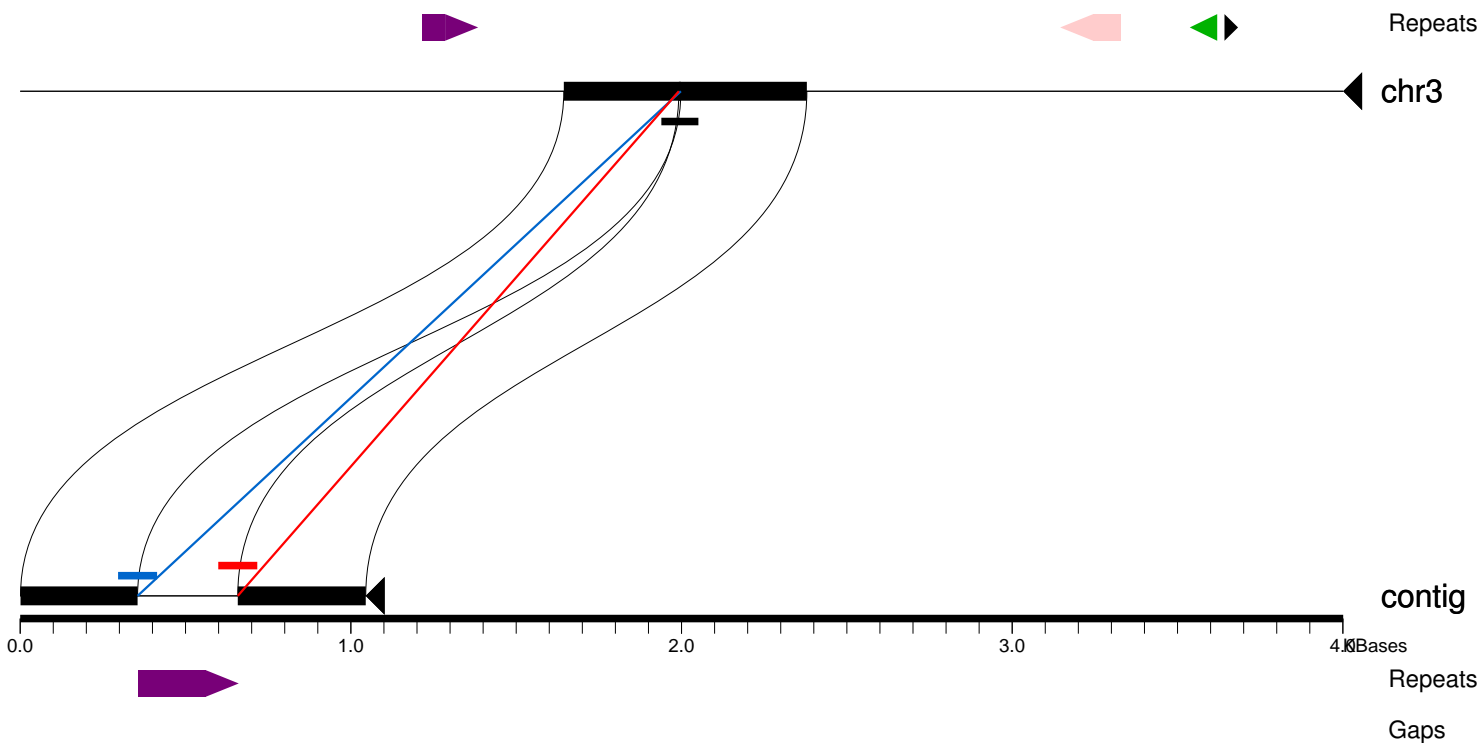

siteID: chr3\_82056153 Scaffitig1 + Breakpoint: chr3:82056135

chr3:82056086-82056194

Overlap Length: 11 INS size: 423 Genotyped: No

```
left  AGGGCACA-----GAAATATAAAATTATAG--ACTAAATCCGCTTTACATCCTG---GATATGAATATCTT
chrom AGGGCACA-----GAAATATAAAATTATAG--ACTAAATCCGCTTTACATCCTG---GATATGAATATCTT
right TCCGCCCGCCTCGGCCTCCCAAAGTGCTGGGATTACAGGCGTGAGCCACCGCGCCCGGCATGAATATCTT
      111**1*111111*111111***1*111*11*1**1*11**11111**1*11*111*11*****
left  TTTTNNNNNNNNNNNNNNNNNNNNNNNNNNNNNNNNNNNNNNNNNNNNNNNNNNNNNNNNNNNNNNNNNNNN
chrom AAT-----AAAATATCAAGAAAACAAATTAAGGTTAGATTTTAAAAATCGTTTG
right AAT-----AAAATATCAAGAAAACAAATTAAGGTTAGATTTTAAAAATCGTTTG
      22*222222222222222222222222222222222222222222222222222222222222222222
```

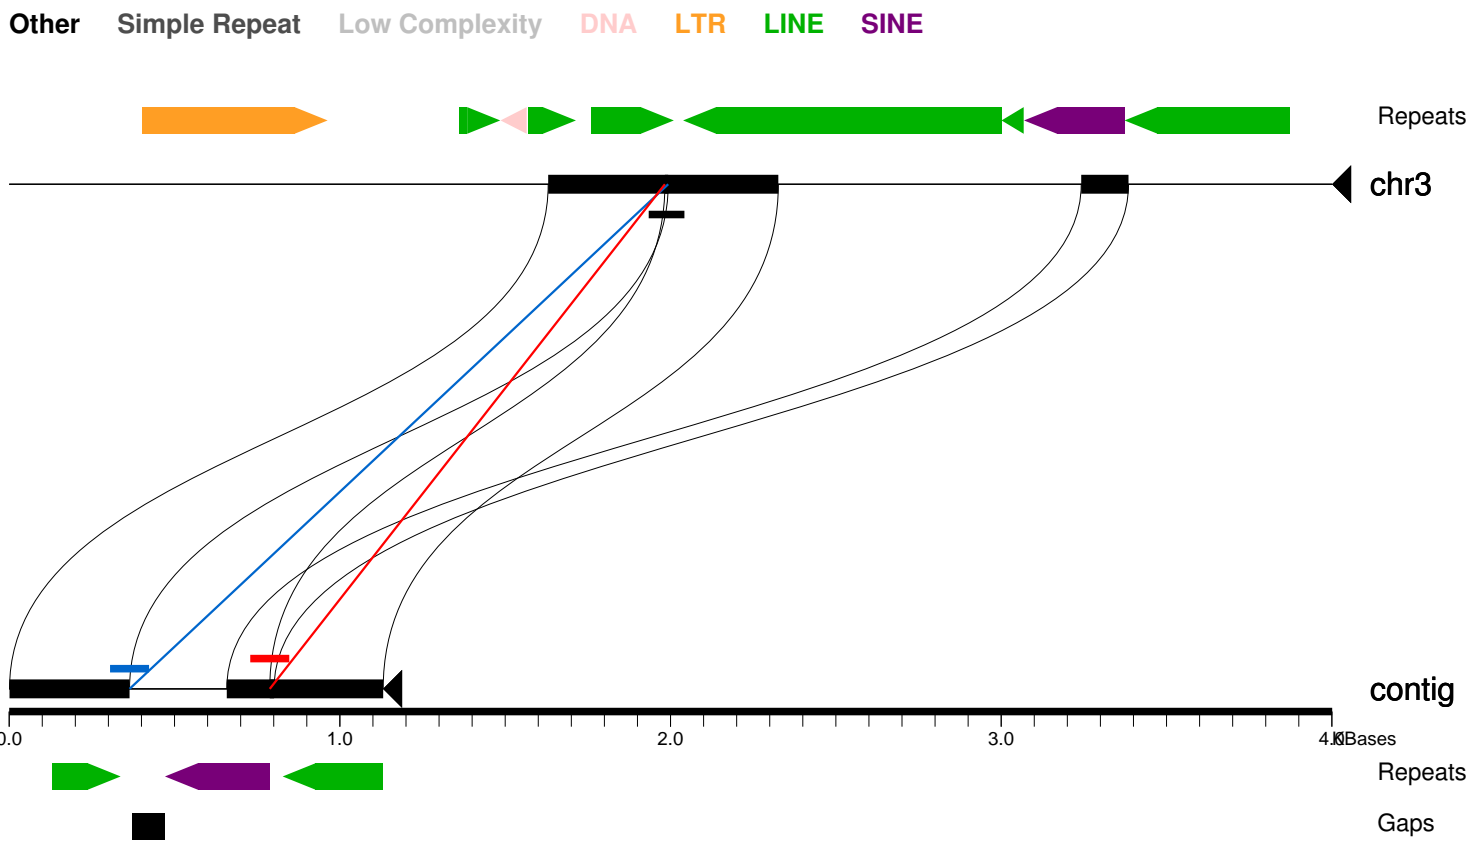







siteID: chr3\_84845477 Scaffitg1 - Breakpoint: chr3:84845506

chr3:84845346-84845674

Overlap Length: 9 INS size: 316 Genotyped: No

```
left -----CTTTAAATTATG
chrom GAATAGCCAAAGCTACCTGAAACAAAAGAGCAAACCTAGAGGAATCACATTACCTGACTTTAAATTATG
right TT-TAGTAGAGACGGGGTTTCACCGTGTAGCCAGGAT---GGTCTCG-ATCTCCTGACCTCG--TGATC
NN 222NNN2NN2NNNNN2NN22NNNNNN222N2NNN2 22NN22N 22NN22222*1*1111*1**1

left CTATAGAGCTATAGTAACCAAACCAGTGTGGTACTGGCATAAAAAACGACAAGTAGACCAATGGAGCAGG
chrom CTATAGAGCTATAGTAACCAAACCAGTGTGGTACTGGCATAAAAAACGACAAGTAGACCAATGGAGCAGG
right CGCCCGC-CTCGGCCTCCCAA---GTGCTGGGATTACAGGCGT-----GAGCCACCGCGCCCG
*1111*11**1111111*****11111111**1***1**1*1*112*1111111**1*1*11*1**11*

left TCCATACACCTACAGTGAGCTCATTTTTG-----
chrom TCCATACACCTACAGTGAGCTCATTTTTGACAATGGTGCCAAGAACATACATCAGGGAAAGGACAGTCTC
right GCC-----TCATTTTTGACAATGGTGCCAAGAACATACATCAGGGAAAGGACAGTCTC
1**11111111111111111******22222222222222222222222222222222222222222222222222222

left -----TTTT-----TTTTTTTTT-----
chrom CTCAATAAGTGGTGTTGGTAAAAATAGATATGCAGAAGAAATGAAAATAGACCTCTATCTCTCACCATATA
right CTCAATAAGTGGTGTTGGTAAAAATAGATATGCAGAAGAAATGAAAATAGACCTCTATCTCTCACCATATA
22222222222*2**2222222222222222222222222222222222222222*2*2*2*2*222222222

left -----TT-----TTTTTTTTTTNNNNNNNNNN
chrom CAATAATCAAATCAAATGGATTACATACTTAAATCTAAGACCTCAAAC
right CAATAATCAAATCAAATGGATTACATACTTAAANNNNNN-----
22222222222222222222*222222*22221N1NNNNNNNNNNNNNNNN
```

Other Simple Repeat Low Complexity DNA LTR LINE SINE

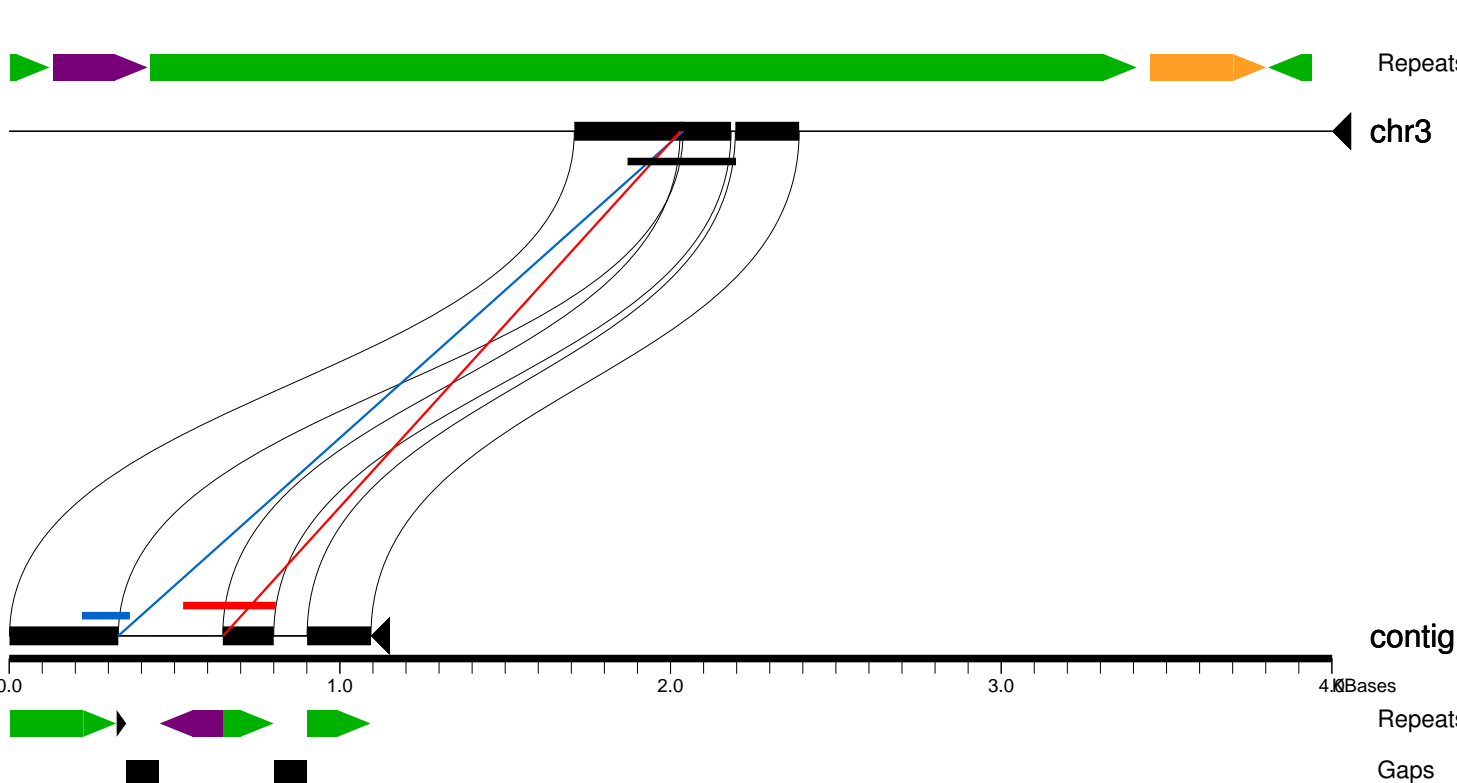







siteID: chr3\_96596485 Scaffitig4 + Breakpoint: chr3:96596488

chr3:96596435-96596547

Overlap Length: 7 INS size: 313 Genotyped: Yes

```
left  TTTAGAGAATTA--ATACTAAC---CAGTGAA-ACTTTCAAAAAACACAGGTTGGCGTTAAATGTTTAT
chrom TTTAGAGAATTA--ATACTAAC---CAGTGAA-ACTTTCAAAAAACACAGGTTGGCGTTAAATGTTAAA-
right CCACCCGCCTCGGCCTCCCAAAGTGCTGGGATTACAGGCGTGAGCCACCGCGCCCGGCCAAATGTTAAA-
      111111*11*111111*1*1**1111*1*1**11**111*111*11**1*111111*11*****22*2
```

```
left  TTTATTTTATTTTATTTTGTGAGACGGAGTCTCGCTCTGTGCGCCAGGCCGGAC
chrom --TAGGTTTTTGTAAATCTGTATCCATGCCAT-TAGTATTTTGAATTAAT--GTAC
right --TAGGTTTTTGTAAATCTGTATCCATGCCAT-TAGTATTTTGAATTAAT--GTAC
      22**22**2**2**2*2*2222*2*222*2*2*222*2*22222*2222*2**
```

Other Simple Repeat Low Complexity DNA LTR LINE SINE

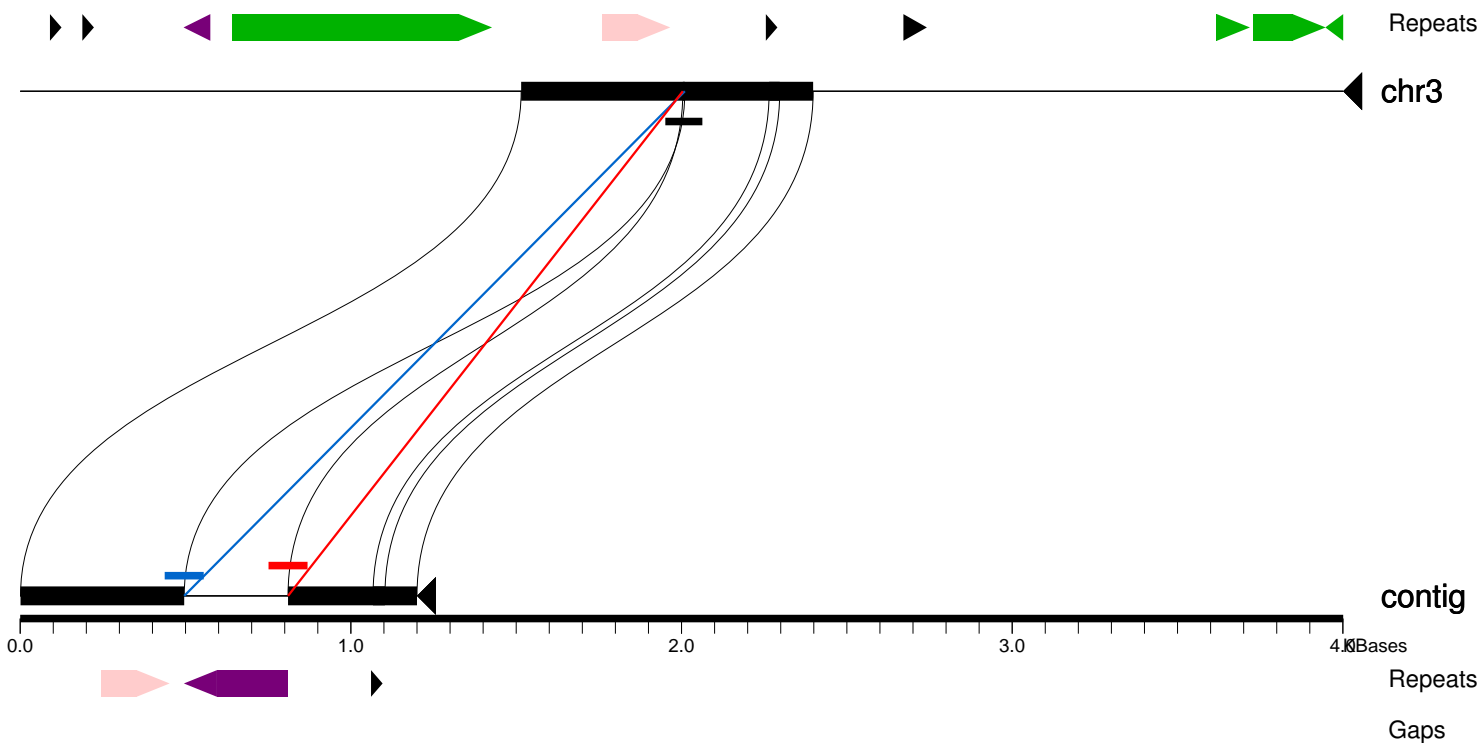

siteID: chr3\_98726756 Scaffitg13 - Breakpoint: chr3:98726761

chr3:98726601-98726936

Overlap Length: 16 INS size: 296 Genotyped: Yes

```
left -----GTGTAGACAGGAGAGAACCCACCCCTACACCAGGATCTTTTATTAGCCAGATGC
chrom CTAGTGATCTGCCTGGGTGTAGACAGGAGAGAACCCACCCCTACACCAGGATCTTTTATTAGCCAGATGC
right CAGGAGAATGGC----GTGAACCCGGGAGGC-----GGAGCTTGCAGTGAGCC-GAGAC
2NN2N22NNN22 ***1*11*1****11111111111111111111***1***1111*1****1**11*
```

```
left TGTCACAGGGGCTGTTTGCCCATGTTCTCATGCCAGGATTTTGGATGTCCTTCACAATTCTGGTGGATT
chrom TGTCACAGGGGCTGTTTACCCATGTTCTCATGCCAGGATTTTGGATGTCCTTCACAATTCTGGTGGATT
right TGCGCCACTG-CACTCCAGCCTGGGTGACAGAGCGAGACT-----CCGTCTCAAAAACAA----AAA
**111**11*1*11*1121**11*1*11**111*1**11*1111111111**1**1***11*111111*11
```

```
left CCAATTTTCCTTCTTGAATTA AAAACTCACAGAGATGGGC-----CGGGCGCG-----GTGGC
chrom CCAATTTTCCTTCTTGAATTA AAAACTCACAGAGATGATCTTTATGTACTGTCTTGCTATTTACAAGTGTC
right ACAAAAAAC-----AAAAAACCTCACAGAGATGATCTTTATGTACTGTCTTGCTATTTACAAGTGTC
1***1111*11111111**11***1*****22*22222222*2*2*22*2222222222***2*
```

```
left TCACGCTTG-TAA----TCCCAG-----CACTTTGGGAGGCCGAGCGGGTGGATCACGAGGTCAGGAGA
chrom TGAGGCATGCTAAAAGCTTCTAATCTGTCATCTTTGAAAAAAAACCTTTATTTACAAAAACTTGGTGCCAACC
right TGAGGCATGCTAAAAGCTTCTAATCTGTCATCTTTGAAAAAAAACCTTTATTTACAAAAACTTGGTGCCAACC
*2*2**2**2***2222*2*2*222222**22**2*2*222222222222*22*22**22***2222*22
```

```
left TCGAGACCACGGTGA---AACCCCGTCTCTA--CTAAAAATA-----AAAAAAA
chrom TGCAGGCTGCAGTTTGTCAACTCCTGATATATGCTATAATGTTCTGGCAGTAATCC
right TGCAGGCTGCAGTTTGTCAACTCCTGATATATGCTATAATGTT-----
*22*2*22*2**22222**2**222*2**22**2**2222 1NN11NNN
```

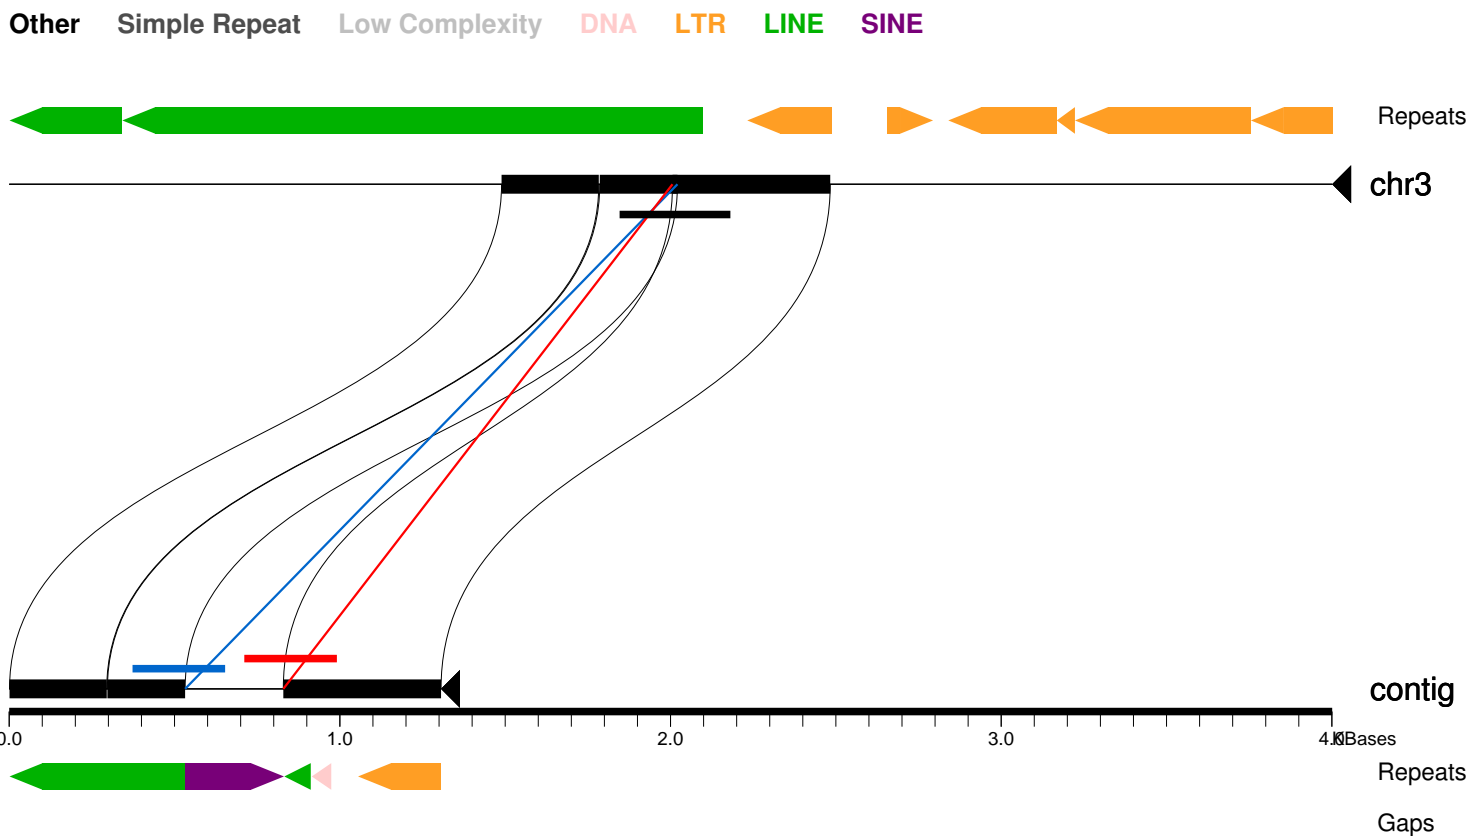



siteID: chr4\_100376741 Scafftig1 + Breakpoint: chr4:100376795

chr4:100376748-100376854

Overlap Length: 13 INS size: 295 Genotyped: Yes

```
left -----GTTATGATGTAGTT-TCTGTTCCAAGAAGTTTACAATATAATACATGTTTAATCAACTT
chrom -----GTTATGATGTAGTT-TCTGTTCCAAGAAGTTTACAATATAATACATGTTTAATCAACTT
right CCGCCCGCCTCGGCCTCCCAAAGTGTCTGGGATTACAGGCGTGAGCCACCGCGCCCGGCCTTAATCAACTT
      111111111111*111*11111***11*11*1*111**11**111*1*1111111*1111*****
```

```
left TTTTTTTTTTTTTTTTGGAGACGGAGTCTCGCTCTGTCGCCAGGCTGGAGTGCAGTGGCGG
chrom TTATATCAATAATCTTTTGTCCCAAATAACTCTACTTTCCAAAAAGAA-----
right TTATATCAATAATCTTTTGTCCCAAATAACTCTACTTTCCAAAAAGAA-----
**2*2*222*22*2**22*2*222222*22***22222***2222*2*222222222222
```

Other Simple Repeat Low Complexity DNA LTR LINE SINE

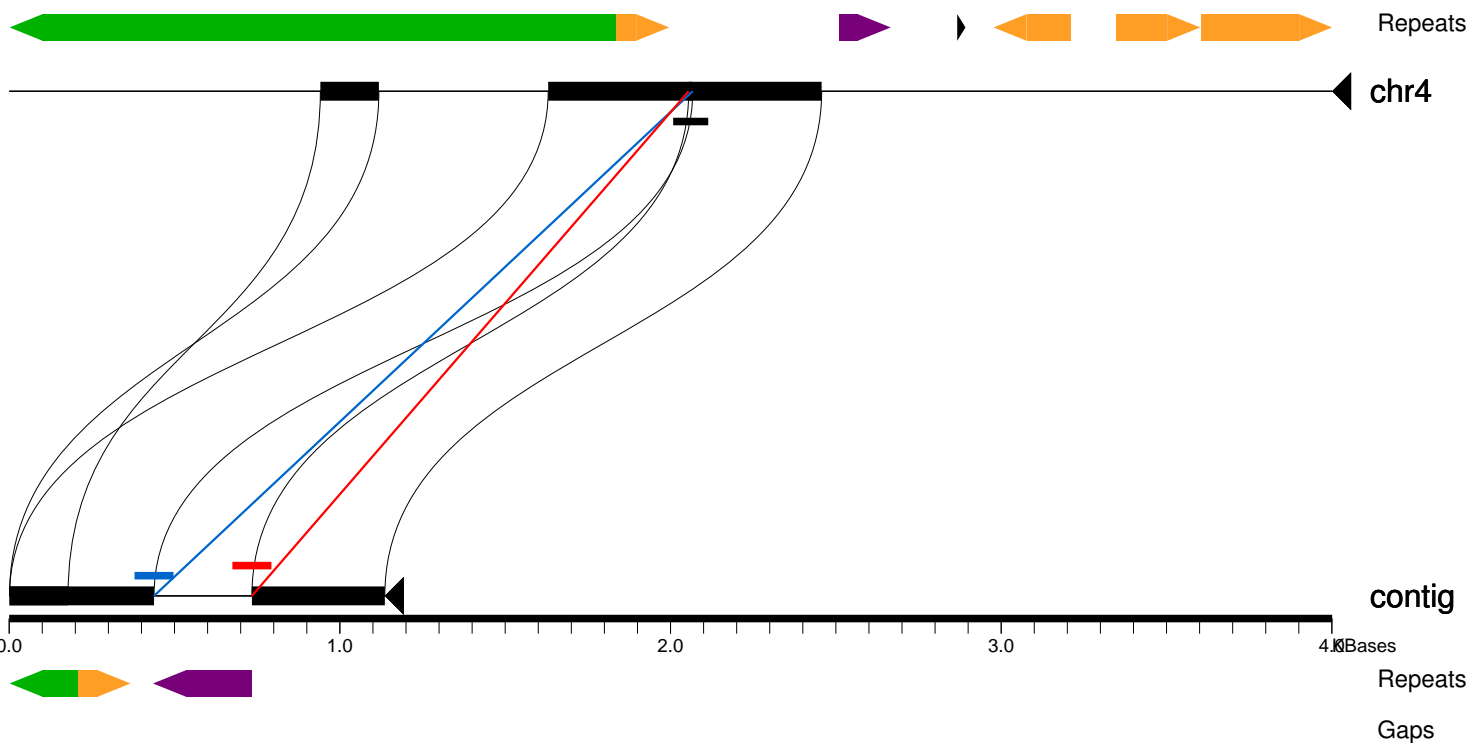

**siteID: chr4\_101891526 Scafftig2 + Breakpoint: chr4:101891537**  
**chr4:101891484-101891596**  
**Overlap Length: 7 INS size: 465 Genotyped: No**

```

left  GAGATGAGGAAGACACTACAGATAATTCCAAATGATTTGATGATTCAAAAAAT-----TCCTTAAGGCC
chrom GAGATAAGGAAGACACTACAGATAATTCCAAATGATTTGATGATTCAAAAAAT-----TCCTTAATTTT
right NNNNNNNNNNNNNNNNNNNNNNNNNNNNNNNNNNNNNNNNNNNNNNNNNNNNNNNNNNNNNNNNNNNNNNNNNNNNN
11111N111111111111111111111111111111111111111111111111111111111111111111111111111
      *****2222

left  GGGCGCGGTGGCTCACGCCTGTAATCCACGACTTTGGGAGGCCGAGGCGGGTGG
chrom CAGC-CTTAAATATATTCCT---ATGCTAATATTTAGGTTTGAATAT--AGGTGT
right CAGC-CTTAAATATATTCCT---ATGCTAATATTTAGGTTTGAATAT--AGGTGT
      22**2*22222222*22***222**2*2*22*2**2**222*222*2222****2
  
```

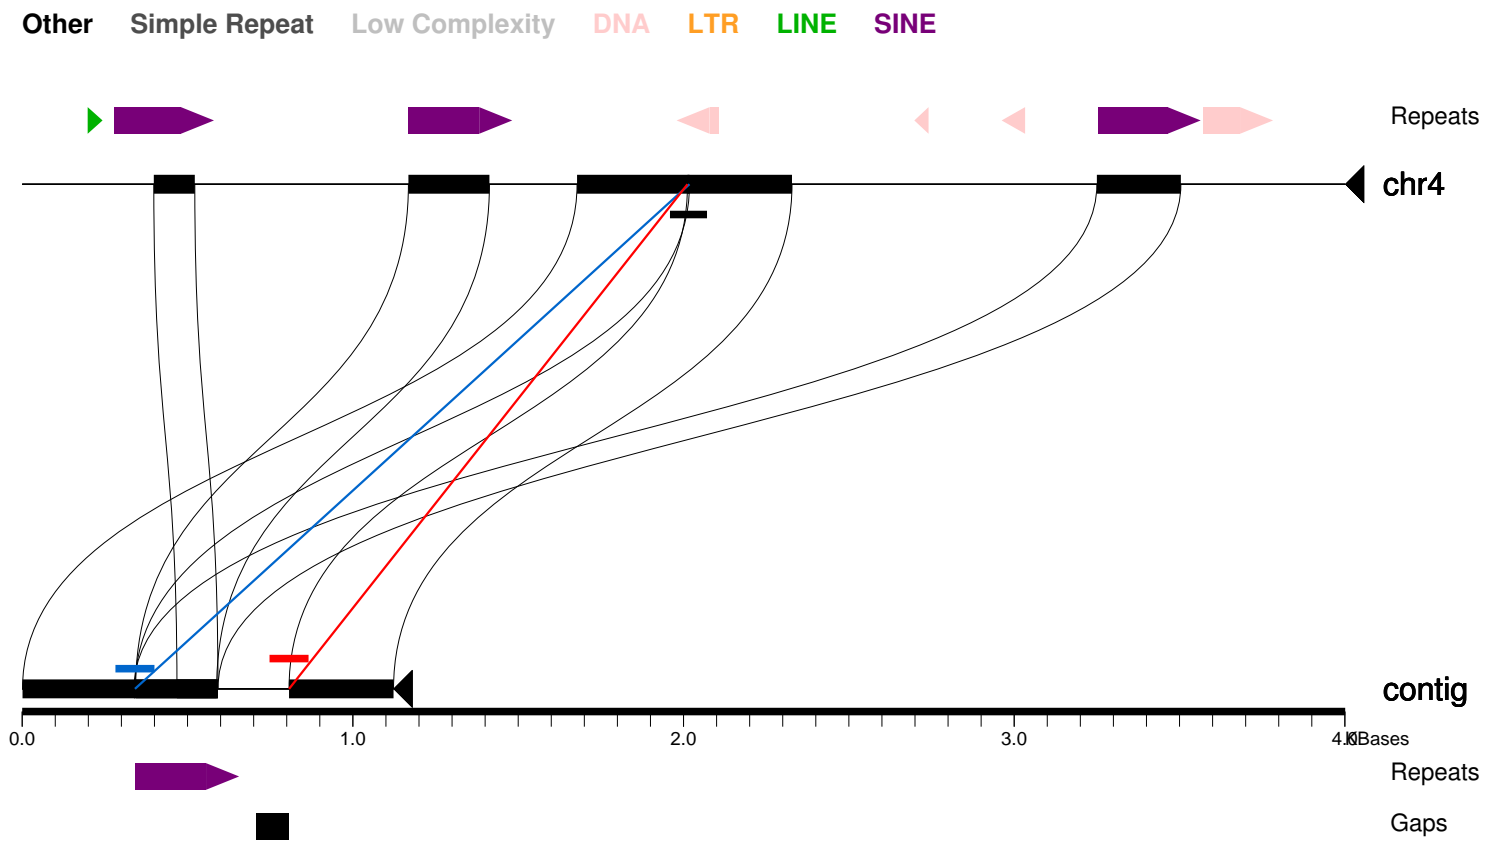

siteID: chr4\_102041751 Scaffitg1 - Breakpoint: chr4:102041736

chr4:102041576-102041897

Overlap Length: 2 INS size: 320 Genotyped: Yes

```
left CCTCTCTGTACTGGAAACTCCTACGGGTTTtaggcctTAGGTCTCCCATTTGATG-TCT-GATATGGGCAAA
chrom C-TCTCTGTACTGGAAACTCCTACGGGTTTtaggcctTAGGTCTCCCGTTGATG-TCT-GATATGGGCAAA
right T-T-----TAGTAGAGAC-----GGGGTTTCACCTT-GTTAGCCAG--GATGGTCTCGATCTCCTGACT
12*111111**1*1**1**111111***1**111***1*1*11**1211***1***1***1*1111*11
```

```
left TCATTTTATTGCCCATTTCCATCCATCACATTACTCAACAGAGGCAGTAGCATATATAATTTTTTTTAAAA
chrom TCATTTTATTGCCCATTTCCATCCATCACATTACTCAACAGAGGCAGTAGCATATATAATTTTTTCTAAAA
right TCATGAT-----CCACCCGCCTCAGCCTCCCAAAGTGCTGGGAT--TACAGGCCTGAGCCACCG
***11*111111111111***1**11*1**11111*1*1**1*111*1*111**1*1111*11121*111
```

```
left AAAATTTTTTAAATTTAAAAACTTTTATTTTTTTTTTTTTTTTTTTTTTTTT-----TTT-----
chrom ATAATTTGTTAAATTTATAAAATACTTTTACATTTACTTTTATAATGATGTTTTTCACTTTGAAATTTCAAATTA
right CGCCCGG-----CCTTACATTTACTTTTATAATGATGTTTTTCACTTTGAAATTTCAAATTA
1N1111211N11N1N1111N1*1*22***22***2*22*22*2***222***22222222222222
```

```
left --TTTTGAGACGGAGTC-----TCGCTCTGTC-----GCCAGGCCGGA----CTGCGGACTGCA
chrom CATTAAAGAAAAGGCATGAGATTGTTTTCTTTGTCCAAAAGAAAGTACAAATCTAAAAATCTGAGAACTTAG
right CATTAAAGAAAAGGCATGAGATTGTTTTCTTTGTCCAAAAGAAAGTACAAATCTAAAAATCTGAGAACTTAG
22**22**2*2**22*22222222*22**2***22222222*22**222*22*2222***2*2***222
```

```
left GTGGCGCAATCTCGGCT--CACTGCAAG-CTCCGCTTCTGGGT
chrom ATTAGATTATCTTAAATTTACATGTCAGGACTAATGTTCAATTTGA
right ATTAGATTATCTTAAATTTACATGTCAGGACTAATGTTCAATTT--
2*222222***2222*222**222**2*2**2222***22221N
```

Other Simple Repeat Low Complexity DNA LTR LINE SINE

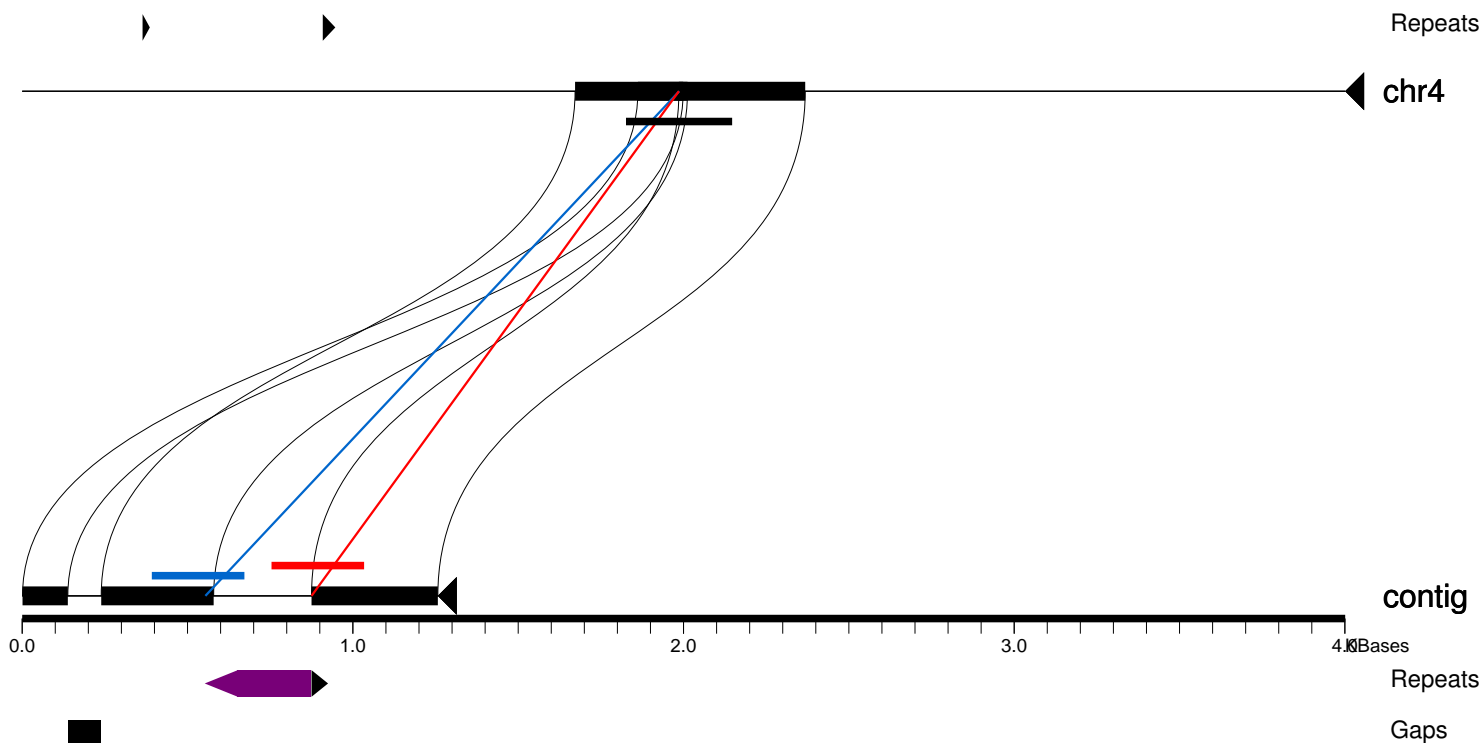

siteID: chr4\_105597114 Scaffitg1 + Breakpoint: chr4:105597120

chr4:105596960-105597294

Overlap Length: 15 INS size: 297 Genotyped: Yes

```
left -----CAATAGGAATTTATTAGCTAGACACTCAGAAGGTTTA-TGAACCCCTCTTTTTCGCTA
chrom AGTAATGAACATACAATAGGAATTTATTAGCTAGACACTCAGAAGGTTTA-TGAACCCCTCTTTTTCGCTA
right GCTGAGG-----CAGGAGAATGGCGTGAACCCGGGAGGCGGAGCTTGCAGTGAGCCGAGATCCCGCCAC
NN2N2N2          **11**1*11111*1*1*11*11*11*1*11*11*1***1*1111*111***11
```

```
left TTTA-TATTTTCTAAAAGATATTGATCTTTTATTTATTTTTCAGTAAAAATATTACATGCATGTATAGTATGA
chrom TTTA-TATTTTCTAAAAGATATTGATCTTTTATTTATTTTTCAGTAAAAATATTACATGCATGTATAGTATGA
right TGCACTCCAGCCTGGGCGACA--GAGCGAGACTCCGTCTCAAAAAAAAAAAAAAAAA-----A
*11*1*11111*11111**1*11**1*11111*111*1***11***1*11*1*111111111111111*
```

```
left AATAGGTTTATAGCCTCTATTTAAGAGATCTTTCCTGGCCGG-----GCGCGGTGGCT
chrom AATAGGTTTATAGCCTCTATTTAAGAGATCTTTCCTGGGACGCTCAAAAACAATCTAATAAGCACTTAGAAT
right AA-----AAGAGATCTTTCCTGGGACGCTCAAAAACAATCTAATAAGCACTTAGAAT
**111111111111111111111111111111111*222*222222222222222222*2*222*22*
```

```
left CACGCTGTAAATCC-----CAGCACTTTGGGAGGCCGAGGCGGGCGG----ATCACGAGGTCAGG
chrom GATACTTTTATTTCTTCTCACTTTCTTCTTTTCTATAACAGAGAACCCTTGGCAATATCCTGAATTTAGT
right GATACTTTTATTTCTTCTCACTTTCTTCTTTTCTATAACAGAGAACCCTTGGCAATATCCTGAATTTAGT
2*22*2*2**2*2*2222222222*2222****222*22*2***222222**2222***22**22*2**2
```

```
left AGATCGAGACCATCCCGCTAAA-ACGGTGAACCCCGTCTCTACTAAA-----
chrom ACTAAAAGCAAA----GGATAAGGAAGGTGTTATGTGGCCTCTGTATAACAGAGAATGTTC
right ACTAAAAGCAAA----GGATAAGGAAGGTGTTATGTGGCCTCTGTATA-----
*22222*222*2222**2***22*2***22*2222*2***2222*1
```

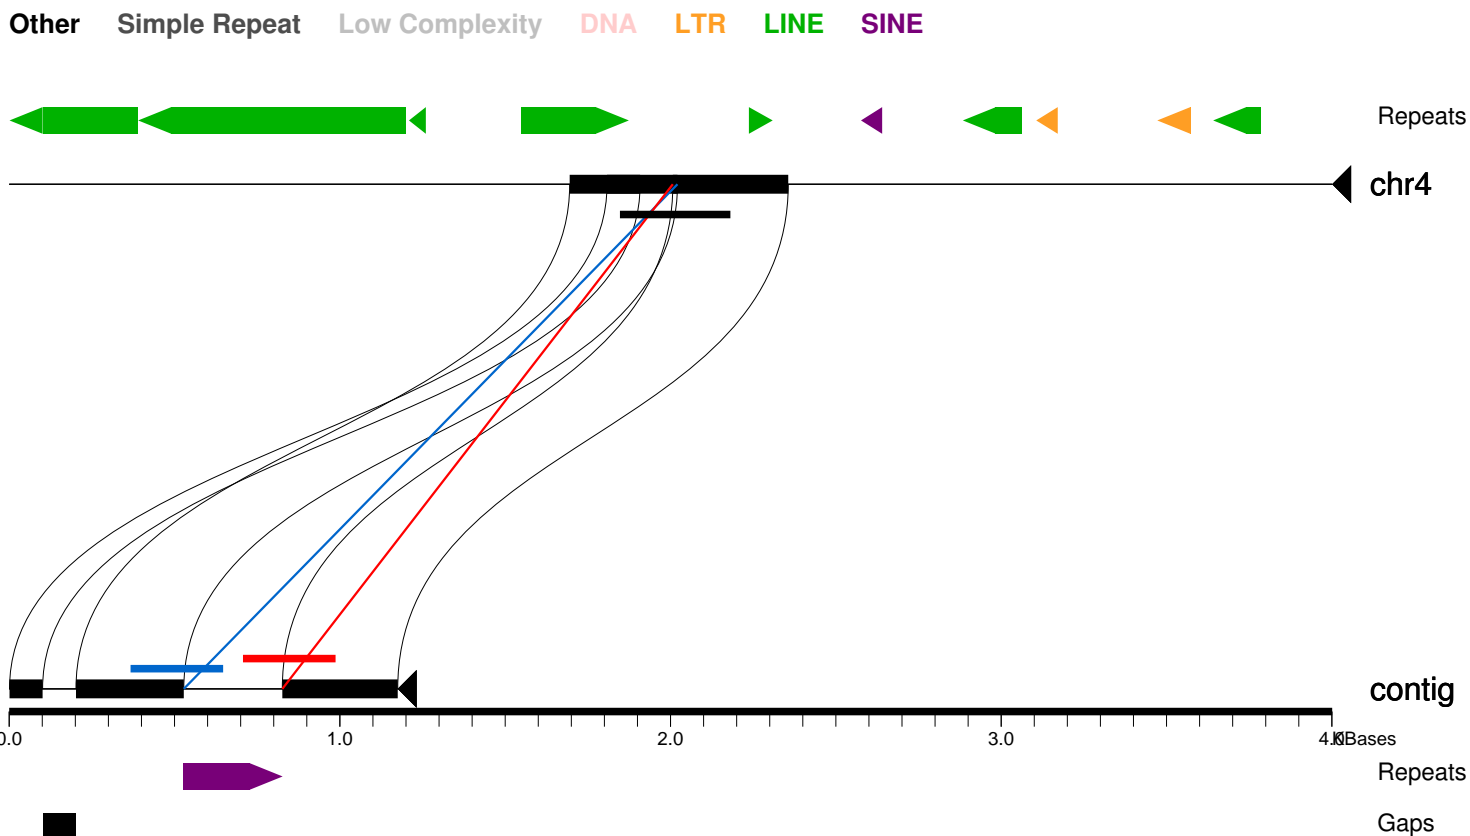

siteID: chr4\_106550729 Scafftig1 - Breakpoint: chr4:106550747

chr4:106550701-106550806

Overlap Length: 14 INS size: 461 Genotyped: No

```
left   TAT-----TCAGCCATCCCAATT-----AATTCAGCCACCAAATCATTATTAGTCTCAAATCTGCAA
chrom  TAT-----TCAGCCATCCCAATT-----AATTCAGCCACCAAATCATTATTAGTCTCAAATCTGCAA
right  TCCGCCCCGCTCGGCCTCCCAAAGTGCTGGGATTACAGGCCTGAGCCACCGCGCCCGGCCAAATCTGCAA
      *1111111111**1***11**1**1*1111111*1*1***1*111*1111111111111111*****
```

```
left   TGTNNNNNNNNNNNNNNNNNNNNNNNNNNNNNNNNNNNNNNNNNNNNNNNNNNNNNNNNNNNNNNNNNNNNNN
chrom  TGTTTTGAGAGCTGACCCTGTCACATATTGCTTGGATATCTGCCAAATA-----
right  TGTTTTGAGAGCTGACCCTGTCACATATTGCTTGGATATCTGCCAAATA-----
      **22222222222222222222222222222222222222222222222222222222222222222222
```

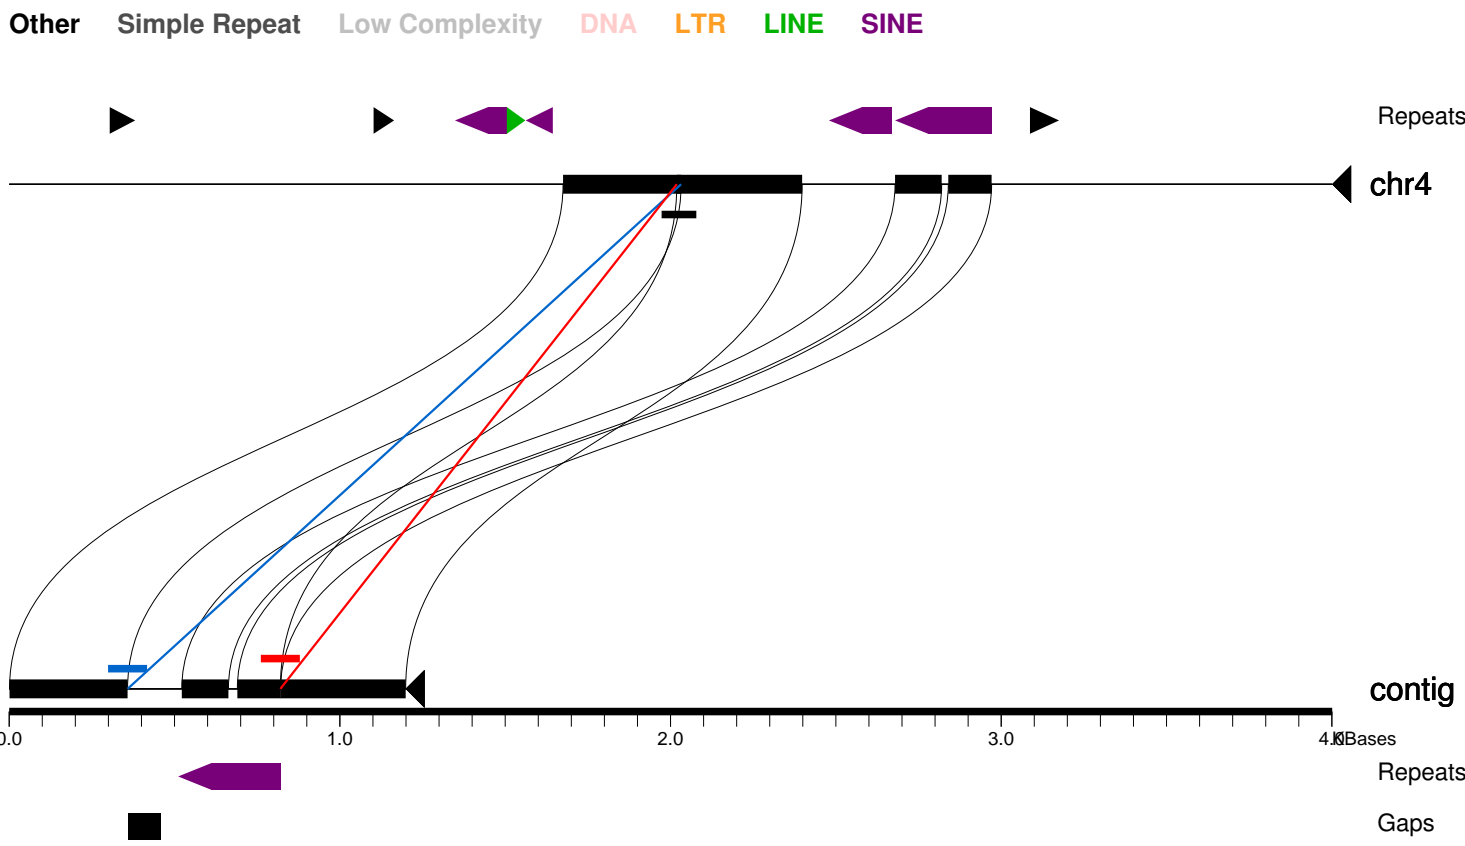



siteID: chr4\_106897036 Scafftig1 - Breakpoint: chr4:106897016

chr4:106896971-106897075

Overlap Length: 15 INS size: 414 Genotyped: No

```
left  AGAGAGCAGAAAAG-CTTAACATATT--TAGCAATAAAA---TTTAAAAATAT-----CCATTTTCTT
chrom AGAGAGCAGAAAAG-CTTAACATATT--TAGCAATAAAA---TTTAAAAATAT-----CCATTTTCTT
right TCCGCCCGCCTCGGCCTCCCAAAGTGCTGGGATTACAGGCGTGAGCCACCGCGCCCGGC-CCATTTTCTT
      111*11*11111*1*1*11**1*1*11*1*1*1**1*1111*1*111*11111111111******
```

  

```
left  TTTT TTTTNNNNNNNNNNNNNNNNNNNNNNNNNNNNNNNNNNNNNNNNNNNNNNNNNNNNNNNNNNNNNNNN
chrom TTTT-----AAAGAAAGCAAATGCACAGCCATGAGCTGCCCTTTCCAGCCTTAT
right TTTT-----AAAGAAAGCAAATGCACAGCCATGAGCTGCCCTTTCCAGCCTTAT
      ***22222222222222222222222222222222222222222222222222222222222222222222
```

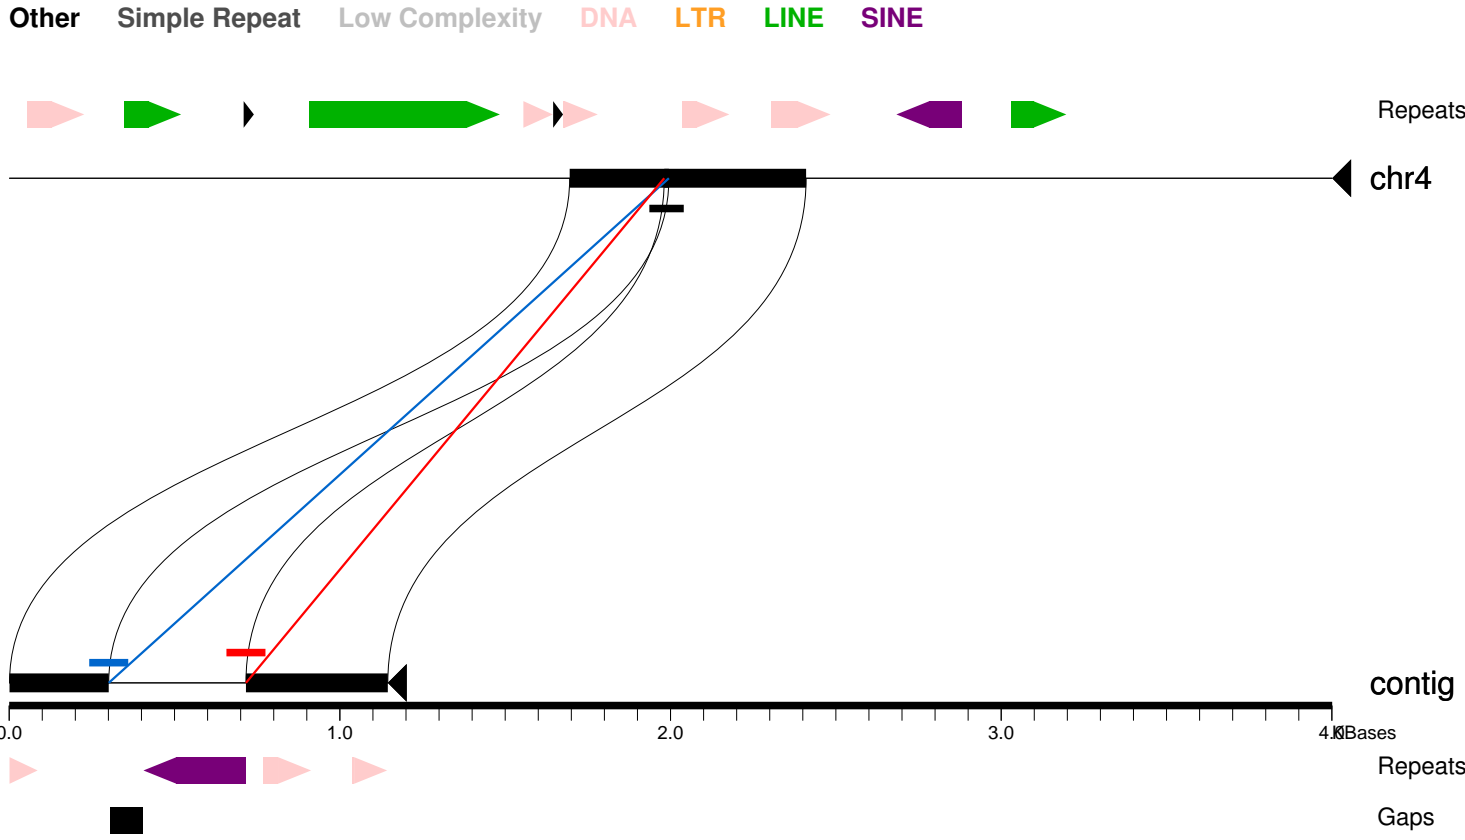

siteID: chr4\_10722292 Scaffitg2 - Breakpoint: chr4:10722274

chr4:10722114-10722453

Overlap Length: 20 INS size: 206 Genotyped: Yes

```
left -----GATAATGAAAAATTA AAAA ACTGCAATGAGTTATCCCTACATACCTATTAGAAT
chrom ACATCATTAGGTATTAAGATAATGAAAATTA AAAA ACTGCAATGAGTTATCCCTACATACCTATTAGAAT
right AGA--AT--GGCGTGAACCCGGG----AGGCGGAGCTTGCAGTGAG-----CCGAGATCGCGCC---ACT
2N2 22 22NN2N2211111111111111*11111*111****1****11111**1*1**11*111111*1*
```

```
left G-ACTTTAAAAACCTCCGCAAAAACGTGTACCATTTACTTTCTACTGTACTATGAAAACGTAATGAGGTAC
chrom G-ACTTTAAAAACCTCCGCAAAAACGTGTACCATTTACTTTCTACTGTACTATGAAAACGTAATGAGGTAC
right GCACTCCAG---CCTGGGCGACA---GAGCGAGACTCCGTCT-----CAAAAAAAA-----AA
*1***11*1111***11**1*1*111*11*1*1111*11**1111111*1*11****11111111111*1
```

```
left AGAAAAACCACAAGAGAGATGAAAAATAAAGAACTGAACAAACCCCGTCTCTACTAAAAATA-----
chrom AGAAAAACCACAAGAGAGATGAAAAATAAAGAACTGAACAAACCCCGTCTCTACTAAAAATA-----
right AAAAAAACCACAAGAGAGATGAAAAATAAAGAACTGAACAAACCCCGTCTCTACTAAAAATA-----
*1*****11*1**1*1*1*11*1****1*****2222222*2*22*****22222222
```

```
left -CAAAAATTAGCCGGGC---GTGG---TGGCGGGCGCCTGTAGTCCA-----GCTACTTGGGAGG
chrom CCAAAATGCTGACAAGGATATGTTGAAAAATGGATCACACATACATTGCTGATGGGAATGTAAAAATTGTACG
right CCAAAATGCTGACAAGGATATGTTGAAAAATGGATCACACATACATTGCTGATGGGAATGTAAAAATTGTACG
2****22*22*22**2222**2*2222***2222*2*2*22*2*2*222222222*22*22*2*2*2*
```

```
left CTGAGGCAGGAGAAATGGCGTGAAC---CCGGGAGGCGGAGC-----TTGCAG---
chrom GGGACGCTGGAAAAACAGCTTGACAGTTTCTTAAAAAAAATAACAACCTAACAAATTGCACTCCT
right GGGACGCTGGAAAAACAGCTTGACAGTTTCTTAAAAAAAATA-----
22*2*2*2**2**22*2***222222*2222*22222*N1 11111N
```

Other Simple Repeat Low Complexity DNA LTR LINE SINE

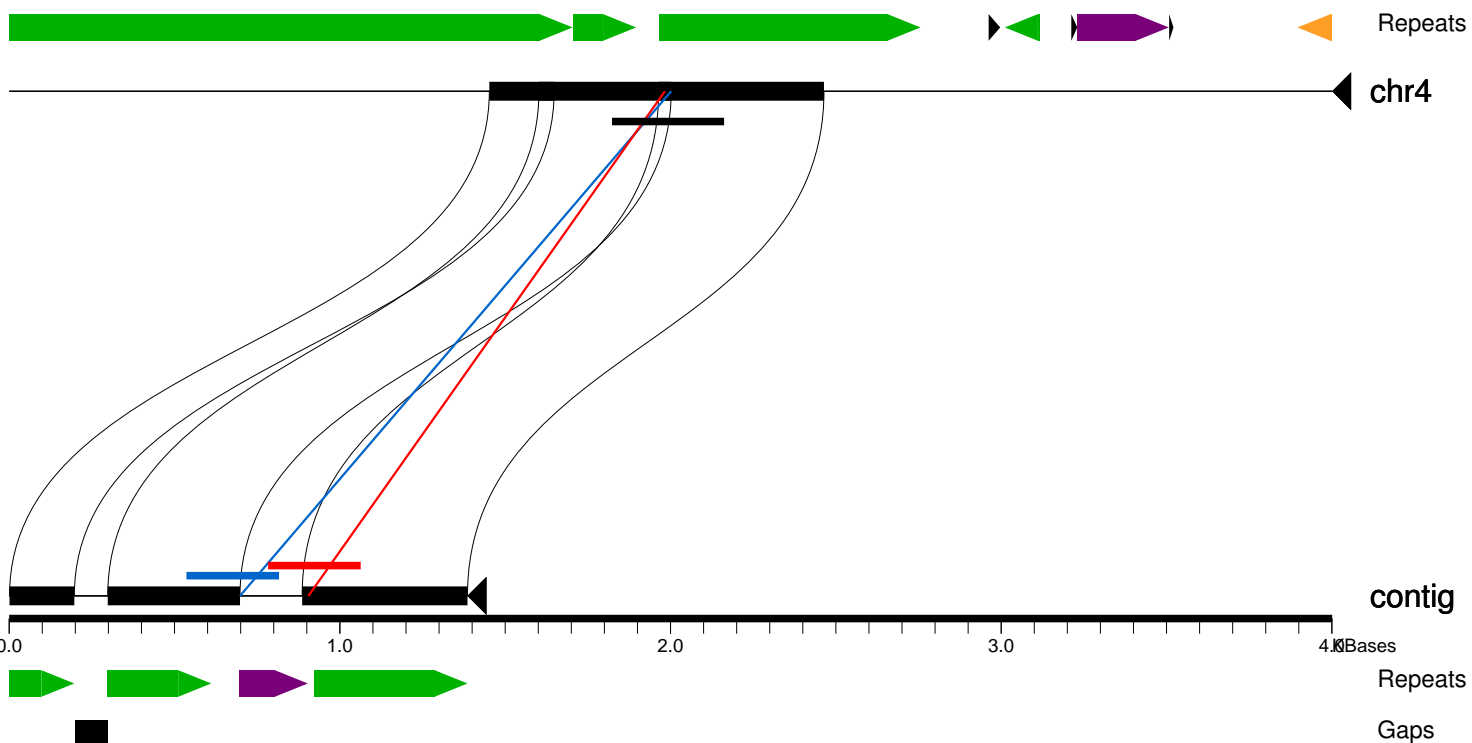



siteID: chr4\_110000962 Scaffitg1 + Breakpoint: chr4:110000952

chr4:110000905-110001011

Overlap Length: 13 INS size: 321 Genotyped: Yes

```
left  TCACAG---GCTTCCAGTCTTCCTGAAAAGTCTTATTTATTTACATTTCT-----AAGAGTTCAA
chrom TCACAG---GCTTCCAGTCTTCCTGAAAAGTCTTATTTATTTACATTTCT-----AAGAGTTCAA
right ACAGAGCGAGACTCC-GTCTCAAAAAAAAAAAAAAAAAAAAAAAAAAAAAAAAAAAAAAAAAAAGAGTTCAA
      1**1**111*11***1****11111****11111*111*111*1*1111111111111111*****
```

```
left  GCGGCCGGGCGC-GGTGGCTCACGCCTGTAATCCCAGCACTTTGGGAGGCCGAGGCGGGCGGA
chrom GCGAGTTAAAACTGGTG-----CTGTTTTG--AGAAATTCATCATATCTACT---GAAAT
right GCGAGTTAAAACTGGTG-----CTGTTTTG--AGAAATTCATCATATCTACT---GAAAT
      **22222222*2****22222222****22*222**2*2**2222*222*2*22222*2222
```

Other Simple Repeat Low Complexity DNA LTR LINE SINE

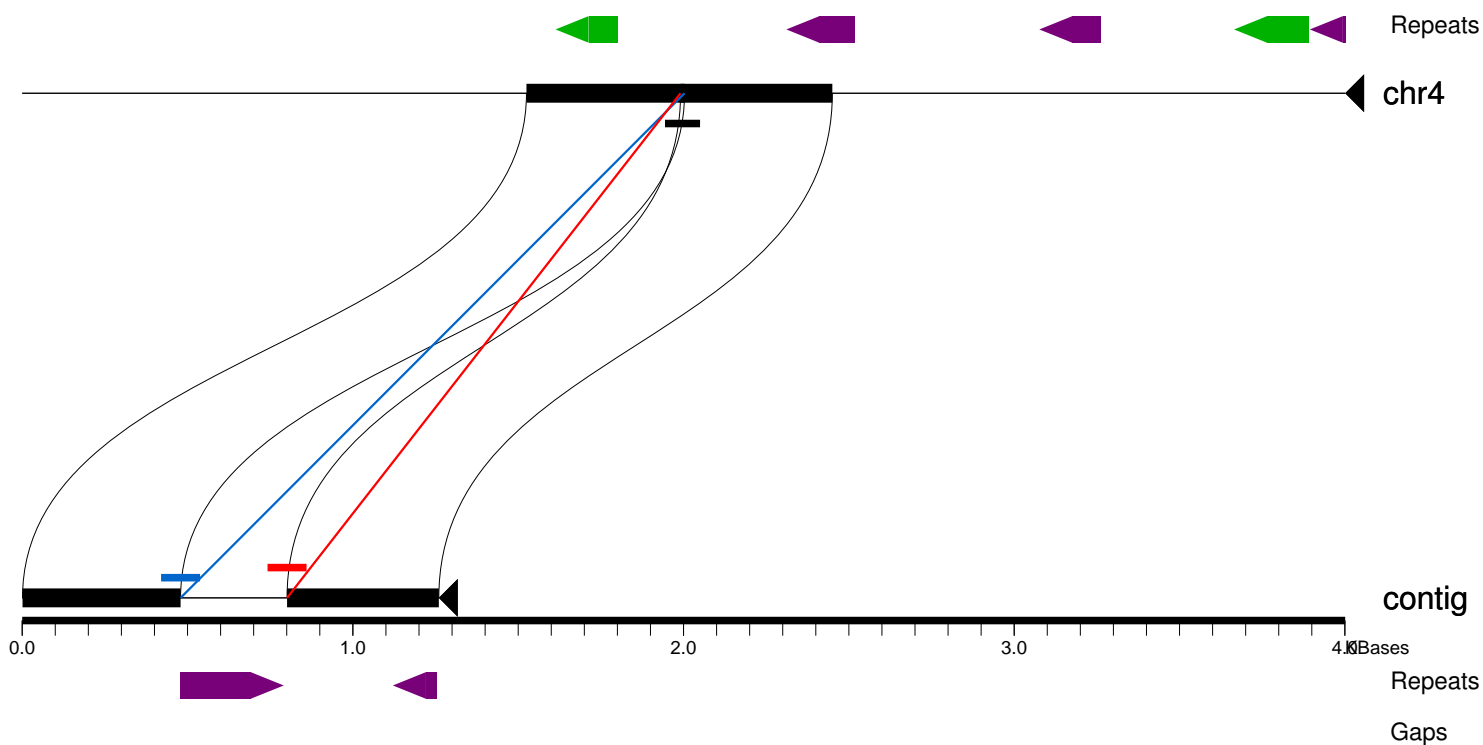

siteID: chr4\_110934950 Scaffitig1 - Breakpoint: chr4:110934960

chr4:110934926-110935019

Overlap Length: 4 INS size: 309 Genotyped: Yes

```
left  T-----TTGAAACC--ATATGATTCCAGTCCAACCTATTAG-----CCTTTTTTTTTT
chrom T-----TTGAAACC--ATATGATTCCAGTCCAACCTATTAG-----CCTTGATTTTCT
right TCCGCCCGCCTCGGCCTCCCAAAGTGCTGGGATTACAGGCGTGAGCCACCCGCGCCCGGCCTTGATTTTCT
*1111111111*11*111*11*11*11*1*111*1*1**1111*1**1111111111111111***22***2*
```

```
left  TTTTTTTTTTTTTTTTTTTTTTTTTTTGAGACGGAGTCTCGCTCTGTGCGCCAGGCTGGAGTGCAGTGGCGGGAT
chrom AACTGATGTTCTTTTCA----TGAGAATAA-----CTG-----ATTATTGTGTGATCT-----T
right AACTGATGTTCTTTTCA----TGAGAATAA-----CTG-----ATTATTGTGTGATCT-----T
222*22*2**2***222222*****222*222222222***222222*222*2*2***222*2222222*
```

```
left  CTCG
chrom TGAA
right TGAA
2222
```

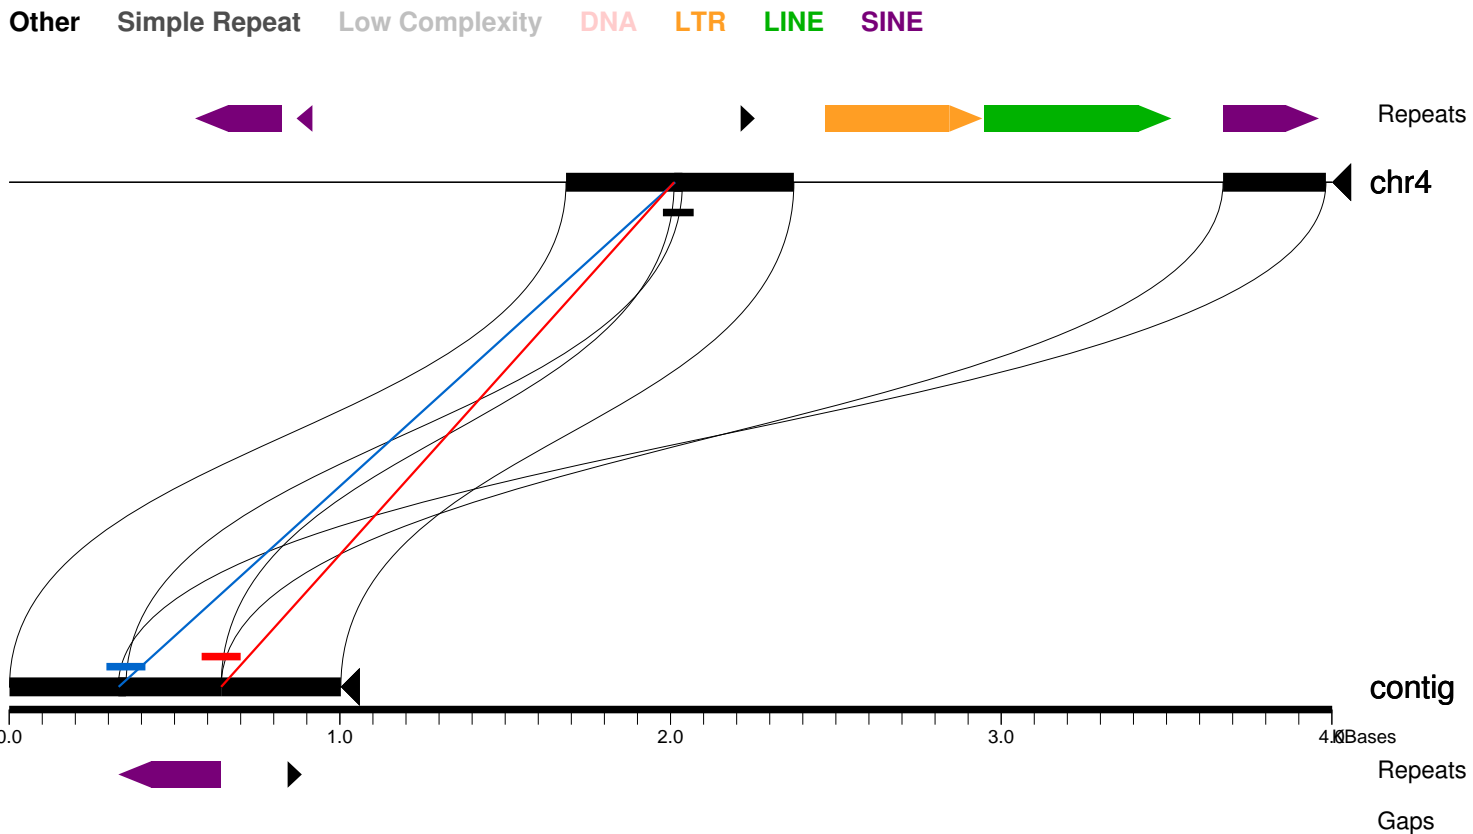

siteID: chr4\_112698436 Scafftig1 - Breakpoint: chr4:112698425

chr4:112698265-112698593

Overlap Length: 9 INS size: 300 Genotyped: Yes

```
left -----GGACCATTCTGACTACGCCCCAGCATCTAGGAAGGTAGTGATGGGATAAACAGGAGGCTGGA
chrom ACTTCTTAGGACCATTCTGACTACGCCCCAGCATCTAGGAAGGTAGTGATGGGATAAACAGGAGGCTGGA
right ----TTTAGTAGAGACGGGGTTTCACCGTTTTAGCCGGGATGGTCTCGATCTCCTGACCTCGTGATCCGC
      2N22*1*1111111*11*1*1**11111*1*11***1***111***1111*1*1*11*1*1111*1
```

```
left CATTCTTTGCGTTCTCCCTTGATTGATGGGGGTTATTGGATTGCTCGCATGCTCTTTACTTATTTAACAT
chrom CATTCTTTGCGTTCTCCCTTGATTGATGGGGGTTATTGGATTGCTCGCATGCTCTTTACTTATTTAACAT
right CCGCCTCGGC---CTCCCAA-AGTGCTGGG-----ATTACAGGCGTG-----AG
      *111**11**111*****111*1*1***111111111***1*11**1**1111111111111111*1
```

```
left CCAAAAAGTCAACCACTATTAAAAAGATATTTTTTTTTTTTTTTTTTGAGACGGAGTCTCGCTCTGTCGC
chrom CCAAAAAGTCAACCACTATTAAAAAGATA GTTTAATTAGATGTCAGTGA--AGTAAGCTGAAT---TCAT
right CCACCGCGCCCGGCC----AAAAGATATGTTAATTAGATGTCAGTGA--AGTAAGCTGAAT---TCAT
      ***1111*1*111*1111111******2***22**222*2*222***222*2*22**222*222**22
```

```
left CCAGGCTGGAGTGCAG--TGGCGGG----ATCTCGGCTCACTGCAA-GCTC----CGCCTCCGGGTTCA
chrom GCAGCCATAAAATTTAAATTTGGCAACTCTAACCTTAGGTTTCTTAAATGGTTTATAGACAACCTATTTTGTTC
right GCAGCCATAAAATTTAAATTTGGCAACTCTAACCTTAGGTTTCTTAAATGGTTTATAGACAACCTATTTTGTTC
      2***2*222*2*22*222*****2222222*2**22*2*22**22*2*2*2222*22**22222*****
```

```
left CGC-----CATTCTC-----CTGCCTCAGC-----
chrom GGCGGTAATGTTAGTACATGTTCTGTCTTACATTACTACTTCAAGACGAAAAATG
right GGCGGTAATGTTAGTACATGTTCTGTCTTACATTACTACTTCAAG-----
      2*2222222222222**22*222222222222*2*2***22
```

Other Simple Repeat Low Complexity DNA LTR LINE SINE

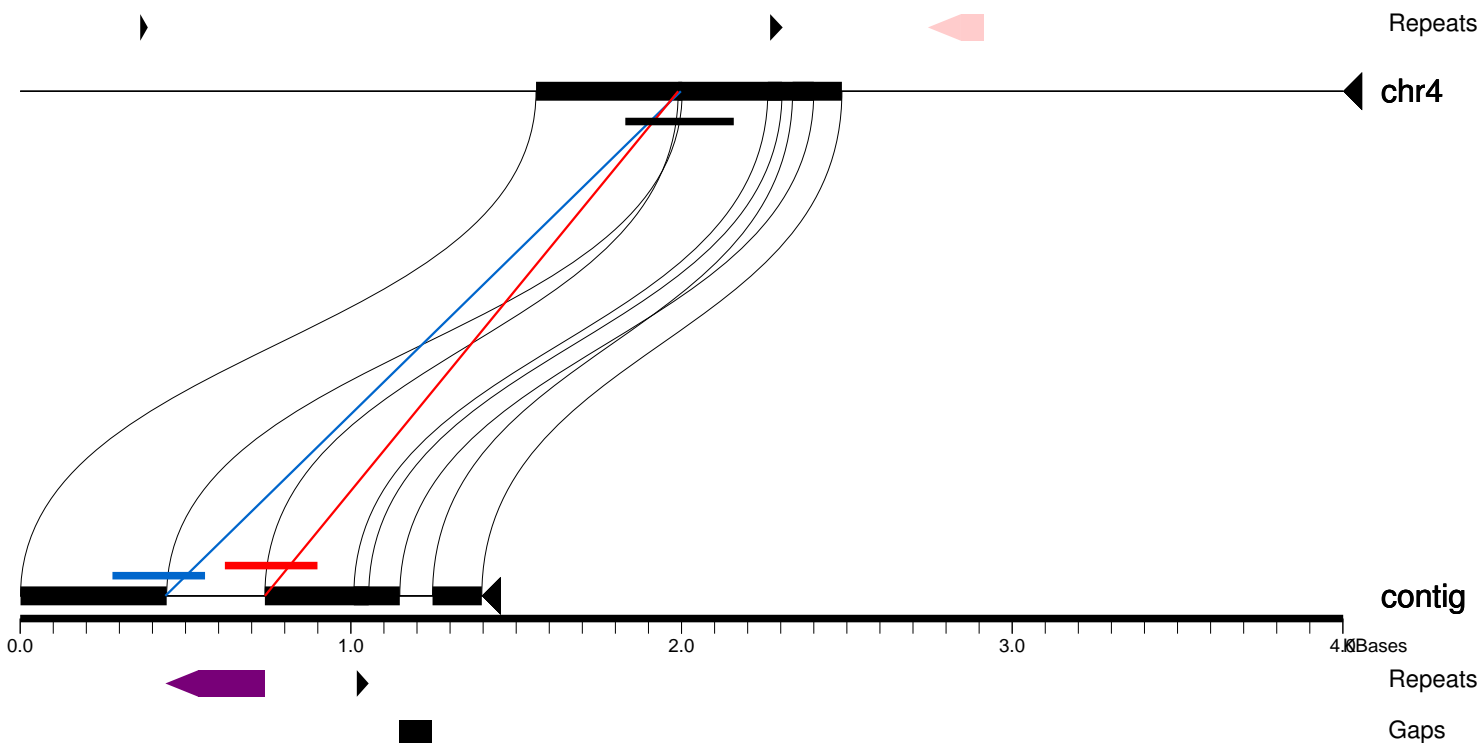





siteID: chr4\_119774709 Scafftig1 + Breakpoint: chr4:119774719

chr4:119774559-119774896

Overlap Length: 18 INS size: 299 Genotyped: Yes

```
left -----ATTGCAACAAAAT-GTCGGCATGAATTTGATGGACCTAAACTTGGCAATTGCAAT
chrom GT-AGTATTAA--GCATTGCAACAAAAT-GTCGGCATGAATTTGATGGACCTAAACTTGGCAATTGCAAT
right TTTAGTAGAGACGGGGTTTCACCGTTTTAGCCAGGATGGTCTCGATCT-CCTGACCTCGTGATCCGCCC
N212222NNN2112N1**1**1*1111*1*1*1*1***111*1***111***1*1**1*11*111**111
```

```
left TTCTATTCTAGGTTACCCAGAAAGTGTGAGACTATGGTTCAGAAAAACAGAACTCTCATCTTAACCCATAT
chrom TTCTATTCTAGGTTACCCAGAAAGTGTGAGACTATGGTTCAGAAAAACAGAACTCTCATCTTAACCCATAT
right C-----CTCGGC-CTCCCA-AAGTG-----CTGGGATT-----ACAGG-----CGTGAGCCA---
11111111**1**11*1****1*****11111**11*1**111111***1111111111*1*1*1**111
```

```
left AAAGACAGAGATAAGCCTATCTCTCTAGTTTAGAACTTTTCCTTT-----TTTTTTTTTTTTTTTT
chrom AAAGACAGAGATAAGCCTATCTCTCTAGTTTAGAACTTTTCCTTAACTGCAGAATAATTAATGCCTCCTGTT
right -----CCGCGCCCCGCCT-----CTAGTTTAGAACTTTTCCTAACTGCAGAATAATTAATGCCTCCTGTT
111111*1*1*1111***111111*****222222222222**22*222*22*2**
```

```
left GAGA-----CGGAGTC-TCGCTCTGTGCCCCAGGC-----TGGAGTGCAGTGGC--GGGA-----
chrom CAGGACAGTATGCAGAGTCATAACTGGTAAAAACAATGTACATTTGGACTCAAGTGGCTAGGGTGAGTTAA
right CAGGACAGTATGCAGAGTCATAACTGGTAAAAACAATGTACATTTGGACTCAAGTGGCTAGGGTGAGTTAA
2**222222222*2*****2*22**2222222*2*2*222222****2*22*****22***22222222
```

```
left -----TCTCGGCTCACTGCAAGCTCCGCTCCCGGGTTCA-CGCCATT--CTCCTGC---CT---
chrom ATCCTTCTGGTCTTAGGGGTAGC---GGGAGAAGTATTCAACATCATTTGCCTCCTACAGTCTTGG
right ATCCTTCTGGTCTTAGGGGTAGC---GGGAGAAGTATTCAACATCA-----
22222**2*2*2*2*22**22**222*222222*22***2*22**11 11111N1 11
```

Other Simple Repeat Low Complexity DNA LTR LINE SINE

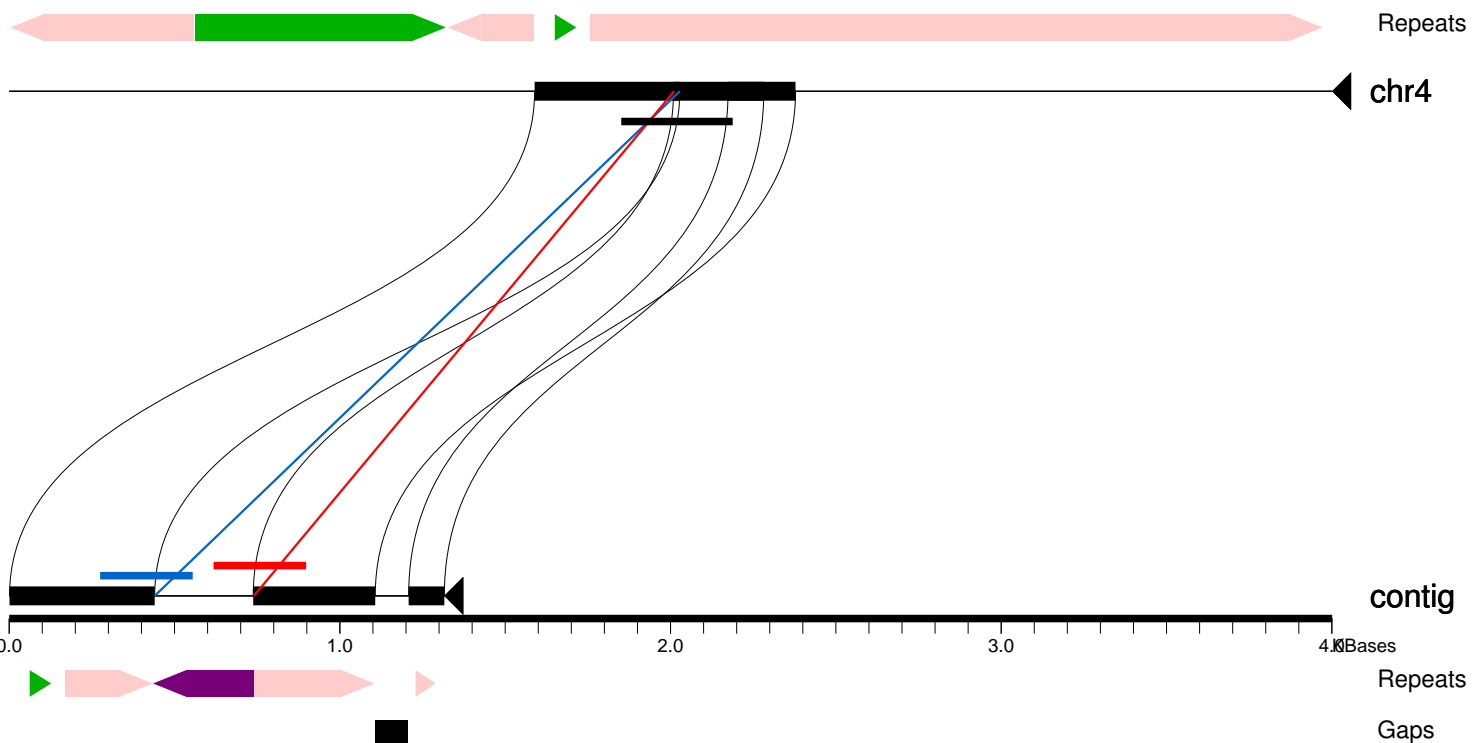

siteID: chr4\_120639911 Scafftig1 - Breakpoint: chr4:120639894

chr4:120639845-120639953

Overlap Length: 11 INS size: 308 Genotyped: Yes

```
left  --AACCTTTGGGATACAGCAAGAGTG-GTGCCAATATTAAAGTTCATACATT-----AAACACCTTCA
chrom --AACCTTTGGGATACAGCAAGAGTG-GTGCCAATATTAAAGTTCATACATT-----AAACACCTTCA
right CCAGCCTGGGCGACAGAGCAAGACTCCGTCTCAAAAAAAAAAAAAAAAAAAAAAAAAAAAAAAAAAAACACCTTCA
      11*1***11*1**1*1*****1*11**11***1*11***1111*1*1*1111111111*****
```

  

```
left  GGCCGGGCGCGGTG-GCTCACGCCTGTAATCCCAGCACTTTGGGAGGCCGAGGCGGGCGG
chrom TCAAAAAGTCTGAAAGAGCACAAATCTAAGGTCA-CACTC-----AAACAAACTA
right TCAAAAAGTCTGAAAGAGCACAAATCTAAGGTCA-CACTC-----AAACAAACTA
      222222222*2*222*22***222*2***222*2***22222222222*22*222*22
```

Other Simple Repeat Low Complexity DNA LTR LINE SINE

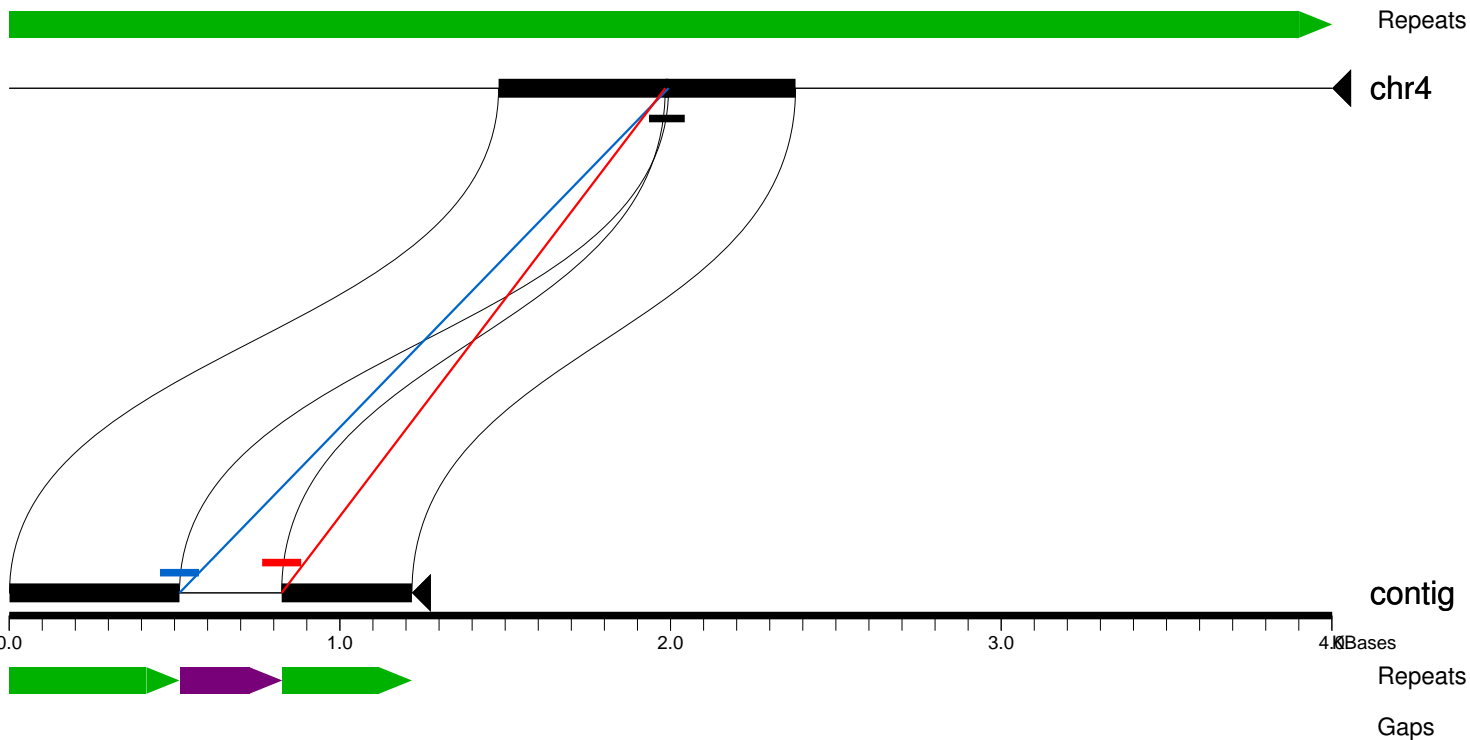

siteID: chr4\_122413795 Scafftig6 + Breakpoint: chr4:122413803

chr4:122413758-122413861

Overlap Length: 15 INS size: 297 Genotyped: Yes

```
left  CTTCATCAAGCTTTGTATC-----ATATTATA--CATCAGATA---AGCTCATC-AACTGTGA
chrom CTTCATCAAGCTTTGTATC-----ATATTATA--CATCAGATA---AGCTCATC-AACTGTGA
right --TCCACCCGCTCGGCCTCCCAGAGTGCTGGGATTACAAGCGTGAGCCACCGCGCCCGGCCAACTGTGA
      11****1*111*11*11**1111111111111111****1*11*1*1**11*1111**1*11*1*****
left  AAATTTTFTTTTTTTTTTTTTTTTTTTTTTTTTTTTTTTTGGAGACGGAGTCTTGCTCTGTCCCCCAGGCTG
chrom AAATTTTAAAGCTTTATGCCTCCCTACTT-----GAAGGC-TCTT---TTGAACAACAT-CT-
right AAATTTTAAAGCTTTATGCCTCCCTACTT-----GAAGGC-TCTT---TTGAACAACAT-CT-
      *****2222***2*222*222*22**222222222**2**22****2222**22*22**22**2
```

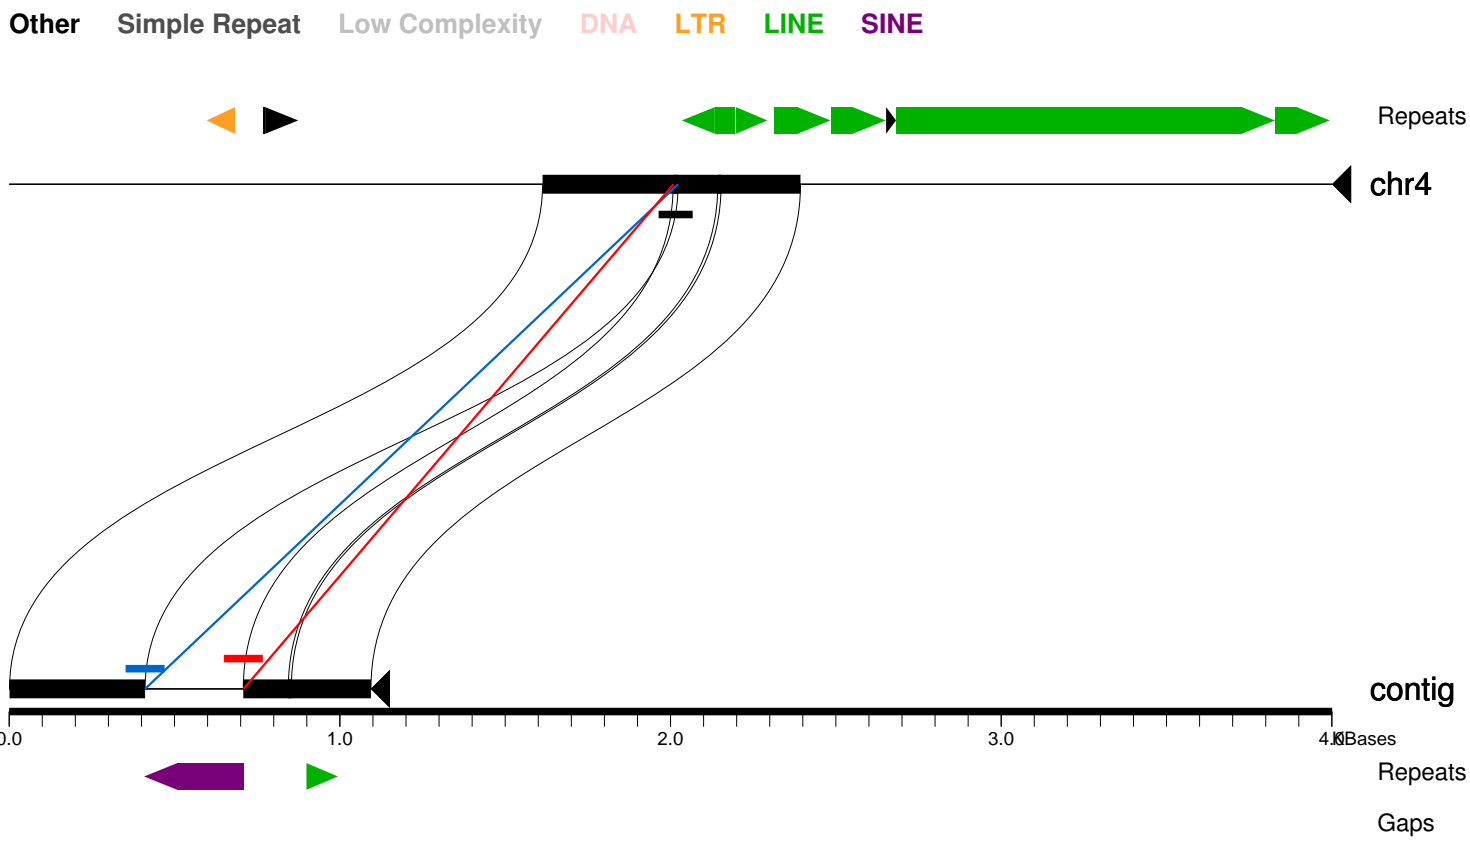





siteID: chr4\_125659017 Scafftig7 + Breakpoint: chr4:125659009

chr4:125658963-125659068

Overlap Length: 14 INS size: 432 Genotyped: No

```
left   A-----TCAGAGTTTCAGGATCTTGAGGCTAACCATTGTCAAC-----ATAATGAAAAGATTTTGT
chrom  A-----TCAGAGTTTCAGGATCTTGAGGCTAACCATTGTCAAC-----ATAATGAAAAGATTTTGT
right  CCGCCCGCCTCGGCCTCCCAAAGTGCTG-GGATTACAGGCGTGAGCCACCGCGCCCGGCCAAGATTTTGT
      1111111111**1*11*11**111*11**1**1*1**1111**1*1*1111111111*11*****
```

```
left   AAA*NNNNNNNNNNNNNNNNNNNNNNNNNNNNNNNNNNNNNNNNNNNNNNNNNNNNNNNNNNNNNNNNNNNN
chrom  AAA*TTCTAATAGTAATAACCAAACAATAATATGGTGCTAGGCACTACTCTA-----
right  AAA*TTCTAATAGTAATAACCAAACAATAATATGGTGCTAGGCACTACTCTA-----
      ***22222222222222222222222222222222222222222222222222222222222222222222
```

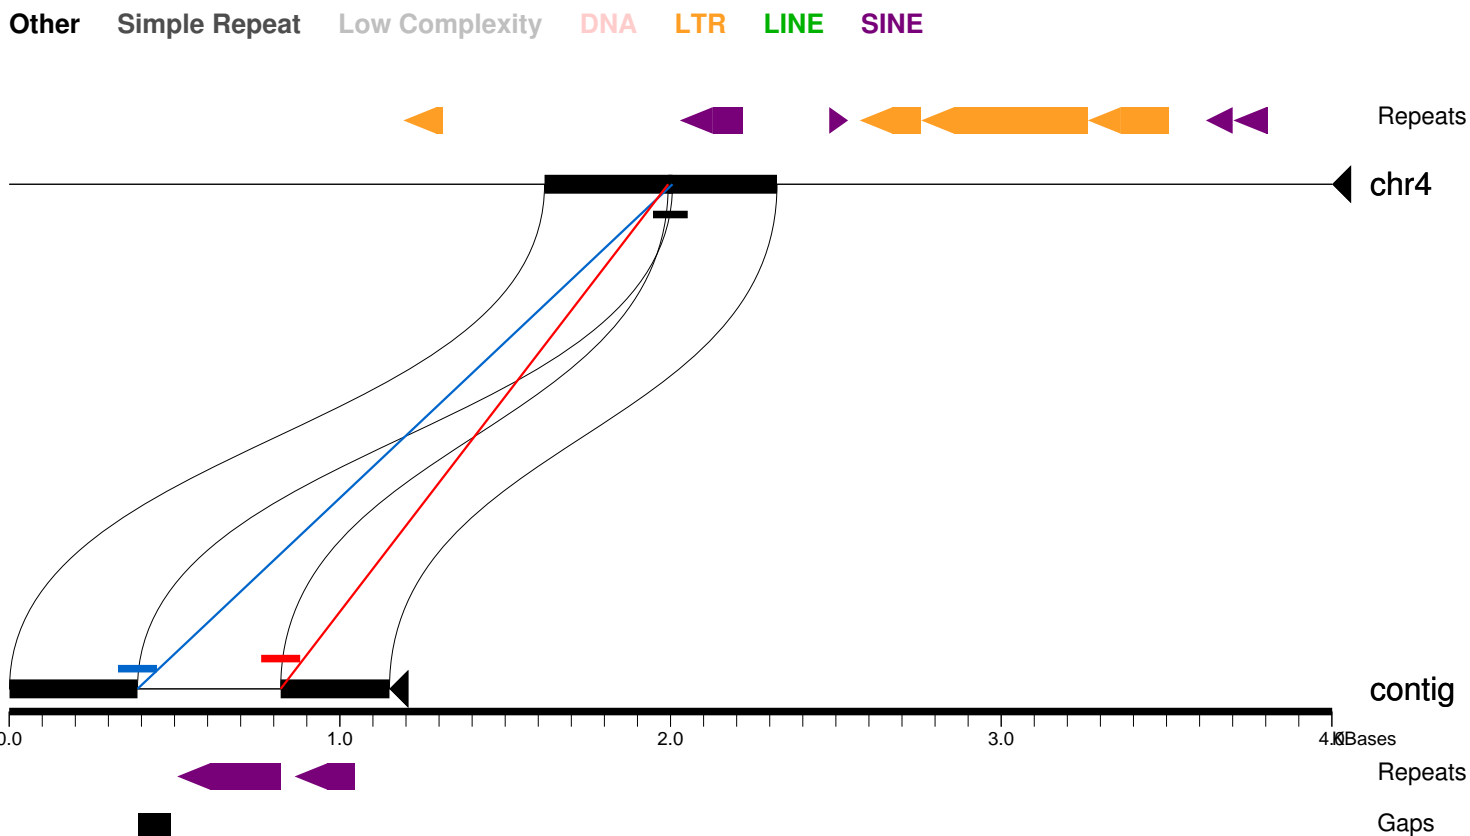

siteID: chr4\_125977743 Scafftig2 + Breakpoint: chr4:125977703

chr4:125977555-125977912

Overlap Length: 62 INS size: 442 Genotyped: No

```

left  -----
chrom GAAGCTCAGCAATTGTATTACACTAAACACTATTAATGACTAAGTCTGTACATAGTGAAAGCAATTC AAT
right NNNNNNNNNNNNNNNNNNNNNNNNNNNNNNNNNNNNNNNNNNNNNNNNNNNNNNNNNNNNNNNNNNNNN A
NNNNNNNNNNNNNNNNNNNNNNNNNNNNNNNNNNNNNNNNNNNNNNNNNNNNNNNNNNNNNNNNNNNN 2
  
```

```

left  -----TCCTCTATTGTACCTCCATGTTACTTTATCAGCATAATAAAA
chrom TCTATTTTCTTTTTCTGAAACAGTTATAATTCCTCTATTGTACCTCCATGTTACTTTATCAGCATAATAAAA
right -----
          11111111111111111111111111111111111111111111111111111
  
```

```

left  CTTTCTCAAAGTAAAACATTTTCAGAAAAAATATGAGTAATATATATGAGCTTTAAAAATGTCAAATGAG
chrom CTTTCTC AAGTAAAACATTTTCAGAAAAAATATGAGTAATATATATGAGCTTTAAAAATGTCAAATGAG
right -----AGTAAAACATTTTCAGAAAAAATATGAGTAATATATATGAGCTTTAAAAATGTCAAATGAG
          1111111111*****
  
```

```

left  GGGCCGCGCGCGGTGGCTCA-----CGCTGTAA-----TCCA---GCAC
chrom CCTTTCTGTTATGGCCAATTAACCTTGTATATTCCTTTTTTTCCCCCTCAAAAAAGAGATTCCACTTGAAC
right CCTTTCTGTTATGGCCAATTAACCTTGTATATTCCTTTTTTTCCCCCTC-----
          22222*2*2222**2222*2*22222222222222222222*2***2N11      1N11  1N11
  
```

```

left  TTTGG-----GAGGCC-----GAGGCGGG
chrom TAAGGAAAAATTTTCAGGATATGAGACACAACCTACACATTTGAATATTTTTTTCTTGTATAAGAAAAATGA
right -----
          1NN11              111N1N                  11NNNN1N
  
```

```

left  C-----
chrom CTTTACAA
right -----
          1
  
```

Other Simple Repeat Low Complexity DNA LTR LINE SINE

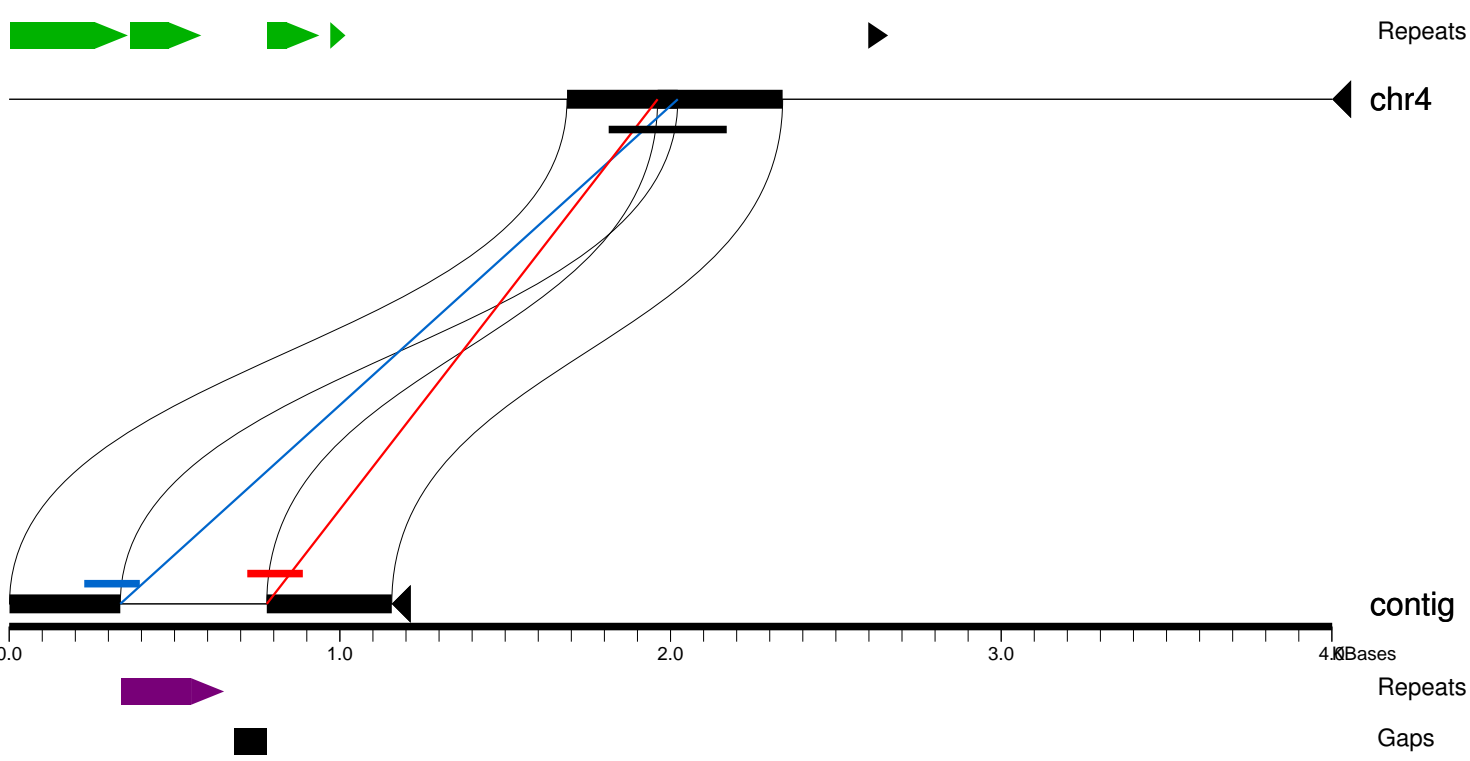

siteID: chr4\_127514848 Scafftig3 - Breakpoint: chr4:127514852

chr4:127514807-127514911

Overlap Length: 15 INS size: 109 Genotyped: Yes

```
left  CTCCCAGACATTTA--CTCGAAGGACTAGAAAAACATAGGTCC-----ACATTAAAACTTCACA
chrom CTCCCAGACATTTA--CTCGAAGGACTAGAAAAACATAGGTCC-----ACATTAAAACTTCACA
right GCCACTGCACTCCAGCCTGGGCGACAGAGCGAAACTCCGTCTCAAAAAAAAAAAAAAAAAAAAAAAACTTCACA
      11*1*1*111*11*11**1*11*1111**11**11*11***11111111111111*1*11*****
```

  

```
left  CAGAGGAGAATGGCGTGAACCCGGGAGGCGGAGCTTGCAGTGAGTCGAGATCGCGCCACTGCA
chrom CAGATGTTTATAGCAG-----CTTTATTCATAATTGCCAA--AACCTAGA-----AGTAAC
right CAGATGTTTATAGCAG-----CTTTATTCATAATTGCCAA--AACCTAGA-----AGTAAC
      ***2*222**2**2222222*222*22*22*22*22**222*22*2***2222222*2*222
```

Other Simple Repeat Low Complexity DNA LTR LINE SINE

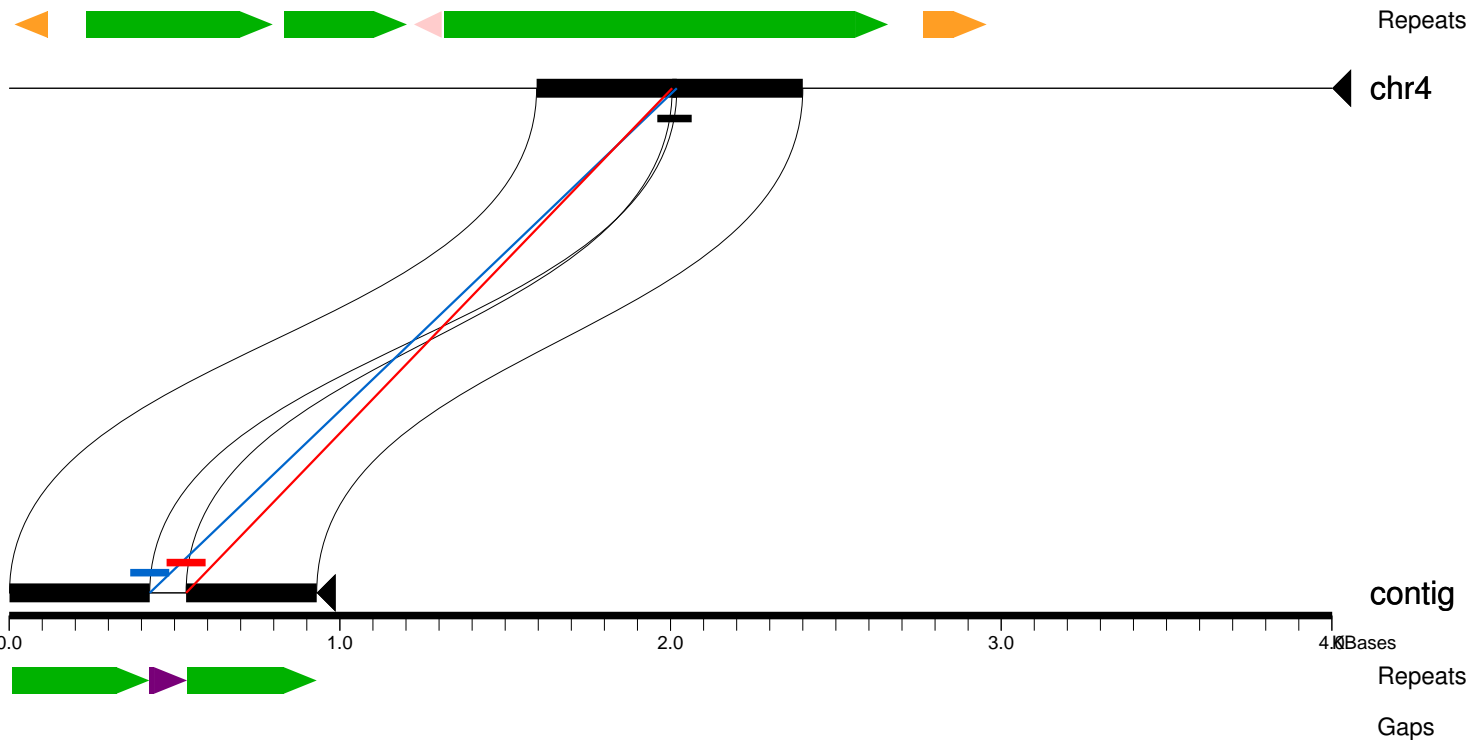

siteID: chr4\_129207234 Scafftig2 - Breakpoint: chr4:129207236

chr4:129207193-129207295

Overlap Length: 17 INS size: 307 Genotyped: Yes

```
left  CAAAGC-----ACTTCTAAAAT----ATCTTCCAGCTATCAAGCACTGAAAT----CAGAAGTATAT
chrom CAAAGC-----ACTTCTAAAAT----ATCTTCCAGCTATCAAGCACTGAAAT----CAGAAGTATAT
right TCCACCCGCTCGGCCTCCCAAAGTGCTGGGATTACAGGCGTGAGCCACCGCGCCCGGC CAGAAGTATAT
      111*1*1111111111**1*1***1*11111111**1***111*1*11***1*11111111*****

left  ATATTTT TTTTTTTTTTTTTTTTTTTTTTTTGGAGACGGAGTCTCGCTCTGTGCGCCAGGCCGGACTGCG
chrom AT-TTTT AAGTGTCAATAAATCTTATACACCTACAGATTAAATT-----AAGGAG
right AT-TTTT AAGTGTCAATAAATCTTATACACCTACAGATTAAATT-----AAGGAG
      **2*** *222*2*222*222*2**2*22*22222**22*222*2222222222222222*22*2*
```

Other Simple Repeat Low Complexity DNA LTR LINE SINE

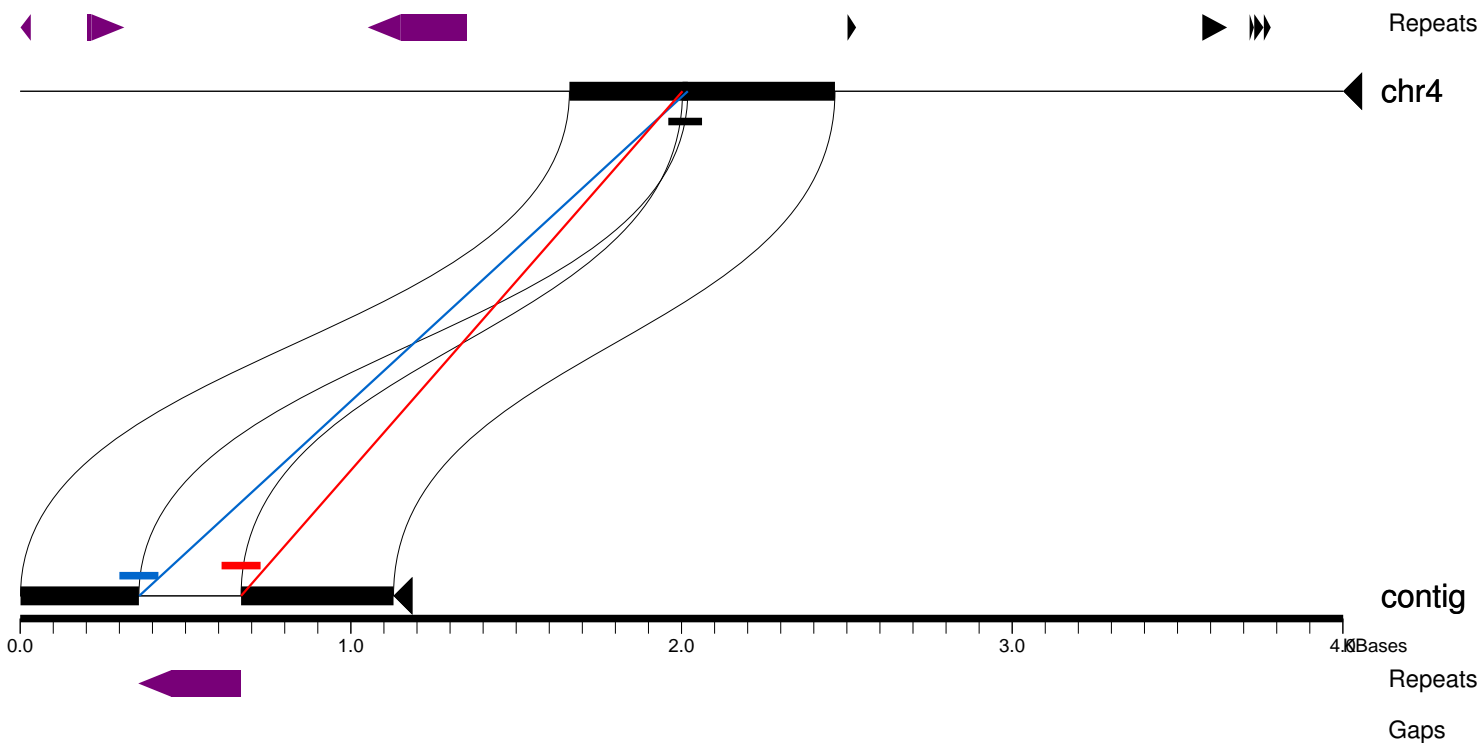

siteID: chr4\_1301840 Scafftig4 - Breakpoint: chr4:1301817

chr4:1301774-1301876

Overlap Length: 17 INS size: 299 Genotyped: Yes

```
left  ---GAACCATTACCTGTGC-----AGATACGGTC----ATGTGTCACTTACATGGAAAACTCTCA
chrom ---GAACCATTACCTGTGC-----AGATACGGTC----ATGTGTCACTTACATGGAAAACTCTCA
right ACTGCACTCCAGCCTGGGCGACAGAGCGAGACTCCGTCTCAAAAAAAAAAAAAAAAAAAAAA*AAAACTCTCA
      111*1**11111****1**111111111***11*1***1111*111111*111*1*111*****
```

```
left  GAAATGCGCCGGGCGCGGTGGCTCACGCCTGTAATCCCAGCACTTTGGGAGGCCGAGGCGGGCGGA
chrom GAAATG-CATCGTTAGGCGACTTTGCGGTGTGA-----ACAT-----CGTGAATGAACT
right GAAATG-CATCGTTAGGCGACTTTGCGGTGTGA-----ACAT-----CGTGAATGAACT
      *****2*222*222**2*2**222222***2*2222222**2*22222222**2**222*2222
```

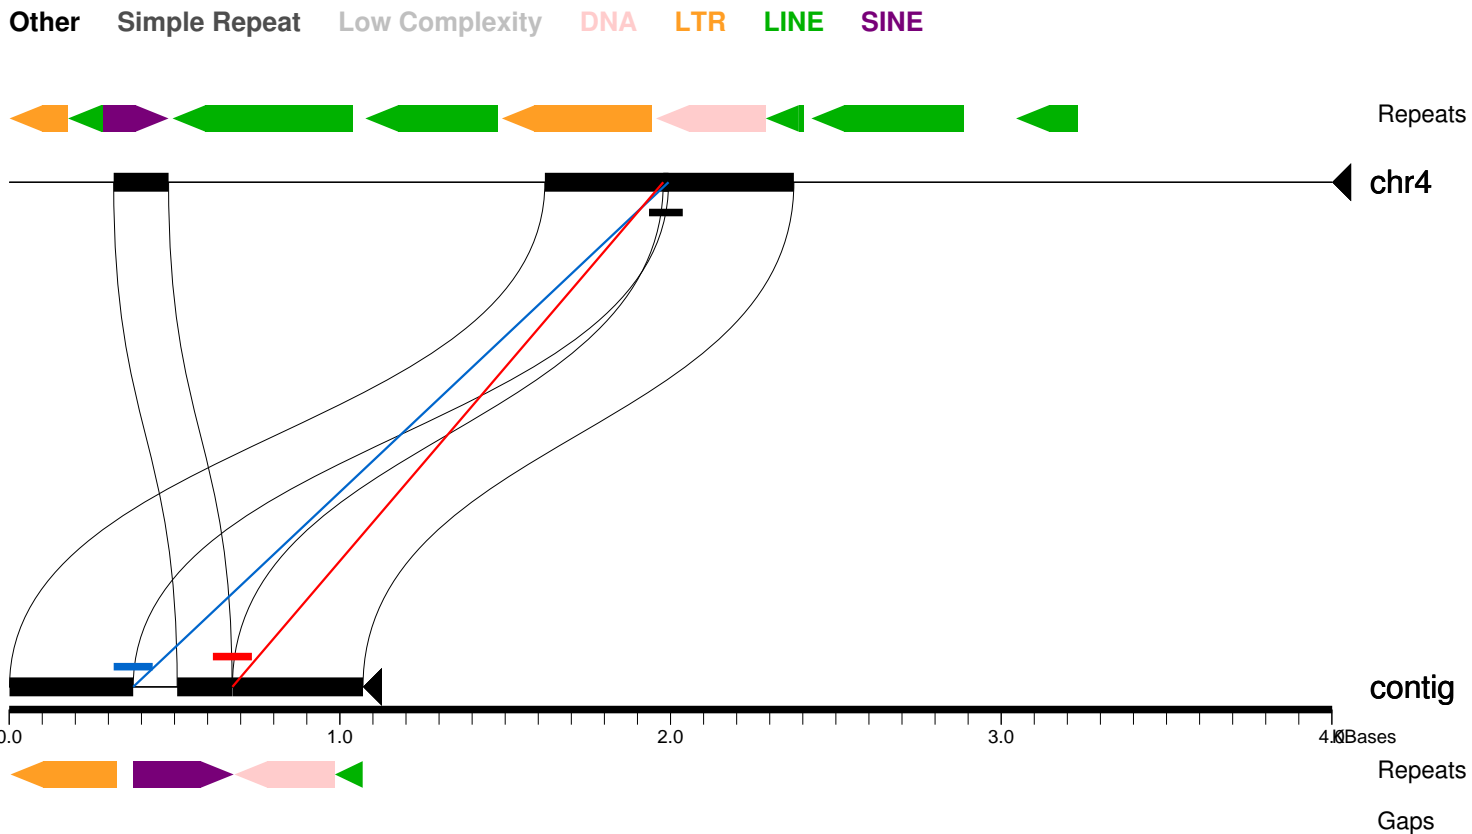

siteID: chr4\_130812800 Scafftig2 + Breakpoint: chr4:130812814

chr4:130812766-130812873

Overlap Length: 12 INS size: 299 Genotyped: Yes

```
left  ----TGCTCTC-ATATTAAGACATGAAGCTT-ACT-----TTAGCATTTAGTTTTCTTTAAAAATGCAGT
chrom ----TGCTCTC-ATATTAAGACATGAAGCTT-ACT-----TTAGCATTTAGTTTTCTTTAAAAATGCAGT
right CCACTGCACTCCAGCCTGGGCGACAGAGCGAGACTCCGTCTCAAAAAAAAAAAAAAAAAAAAAAATAAAAAATGCAGC
      1111***1***1*111*11*11*111***111***11111*1*11*111*1111111111******1
```

```
left  CGGCCGGGCGCGGTGGCTCACGCCTGTAATCCCAGCACTT-----TGGGAGGCCGAGGCGGGCGG
chrom CA-----TATTTCACTAAT---ATGACAGAATTTATAAATTGAAGTT--AGCCATTGGT
right CA-----TATTTCACTAAT---ATGACAGAATTTATAAATTGAAGTT--AGCCATTGGT
      *222222222222*222***222*222**22***2*2**22222*2*2**2222**2*2222*2
```

Other Simple Repeat Low Complexity DNA LTR LINE SINE

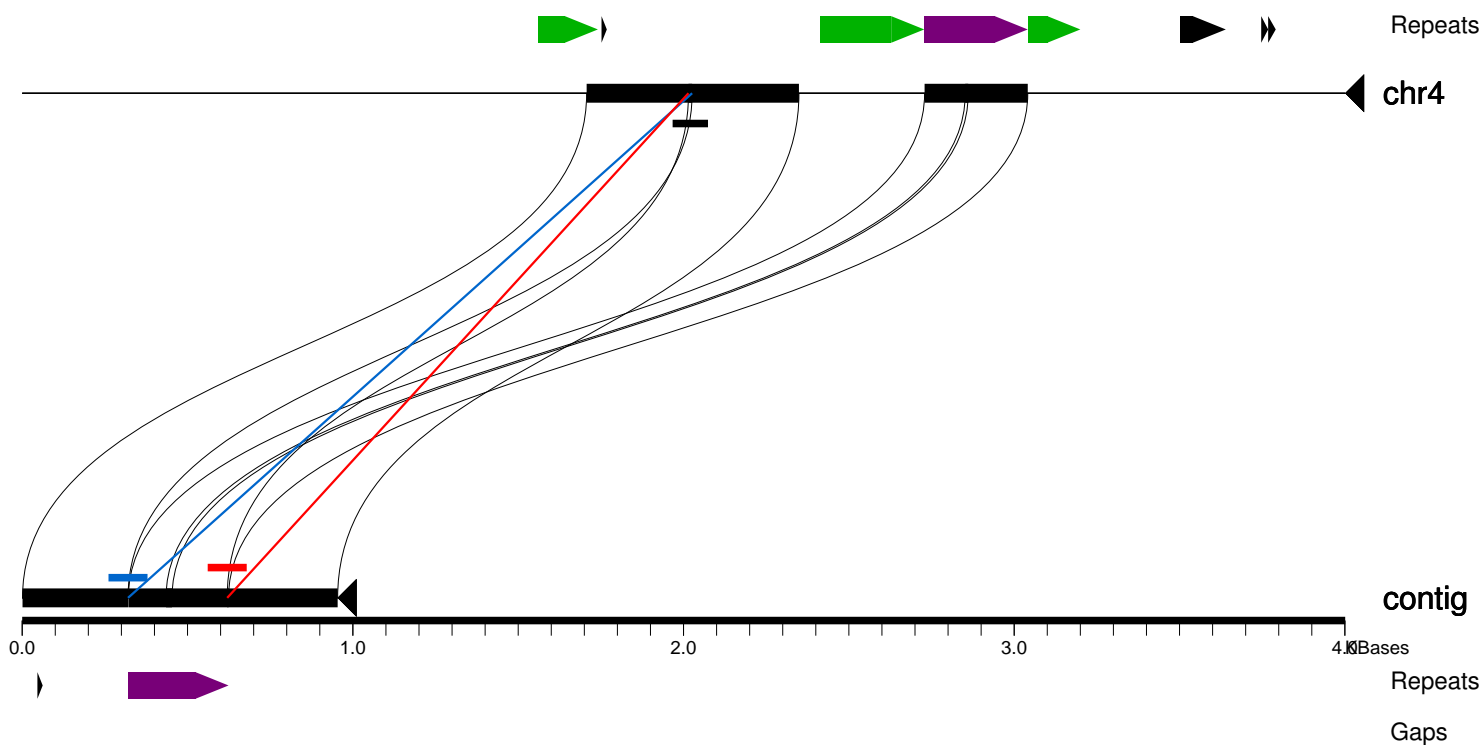





siteID: chr4\_132287439 Scafftig2 - Breakpoint: chr4:132287464  
 chr4:132287304-132287632  
 Overlap Length: 9 INS size: 433 Genotyped: No

```
left  A-----ATAGAGGCACAATCCAAATCGAGTAGAAAATAAAA
chrom ATGTAATCCCTGATGGATGCAAAATCAAGATTGAAATAGAGGCACAATCCAAATCGAGTAGAAAATAAAA
right TT-TAGT-----AGAGACGGGGTTTCACC-TTGTTAGCCAGG-ATGGTCTCGATCTCTG--ACCTCA--
      12 22N2      2NN22N2NNNNNN222NN 222NN*111***1*111**111***111*111*11*1*11
```

```
left  TGTGTTCAACCATAAAGATTAAAGTCAATACTTTTCATTTTATGTTGACATTAATTTACGTACCATTCAAC
chrom TGTGTTCAACCATAAAGATTAAAGTCAATACTTTTCATTTTATGTTGACATTAATTTACGTACCATTCAAC
right --TGATCCACCC----GCCTC--GGC----CTCCCAAAGT--GCTGGGATTAC-----AGGCGTGAGC
      11**1**1***111111*11*111*1*1111**11**111*11*1**11***111111111*1111*1*1*
```

```
left  CTCTGTAACTTTTGCATTTACAAAATGACNNNNNNNNNNN-----
chrom CTCTGTAACTTTTGCATTTACAAAATGACCTTTTTCTATTGCTCTTAGAAAATTAAGAGCAATAGAAACTAC
right CACCGCGCCCG--GCC----CAAAATGACTTTTTCTATTGCTCTTAGAAAATTAAGAGCAATAGAAACTAC
      *1*1*111*1111**111111******22222222222222222222222222222222222222222222222222
```

```
left  -----
chrom AGTCCGAGAAAAATTAGCTAACAAATAAAGTTTAATAAAAACATCCATTTCTACTCCGCAGTTTACACATAC
right AGTCTGAGAAAAATTAGCTAACAAATAAAGTTTAATAAAAACATCCATTTCTACTCCGCAGTTTACACATAC
      2222N222222222222222222222222222222222222222222222222222222222222222222222222222
```

```
left  -----
chrom ACATAAGCACATTCACAAAATATGTAAAGATTTAATAACAATACTAATAA
right ACATAAGCACATTCACAAAATATGTAAAGATTTAATAACA-----
      222222222222222222222222222222222222222222222222222222222222222222222222222
```

Other Simple Repeat Low Complexity DNA LTR LINE SINE

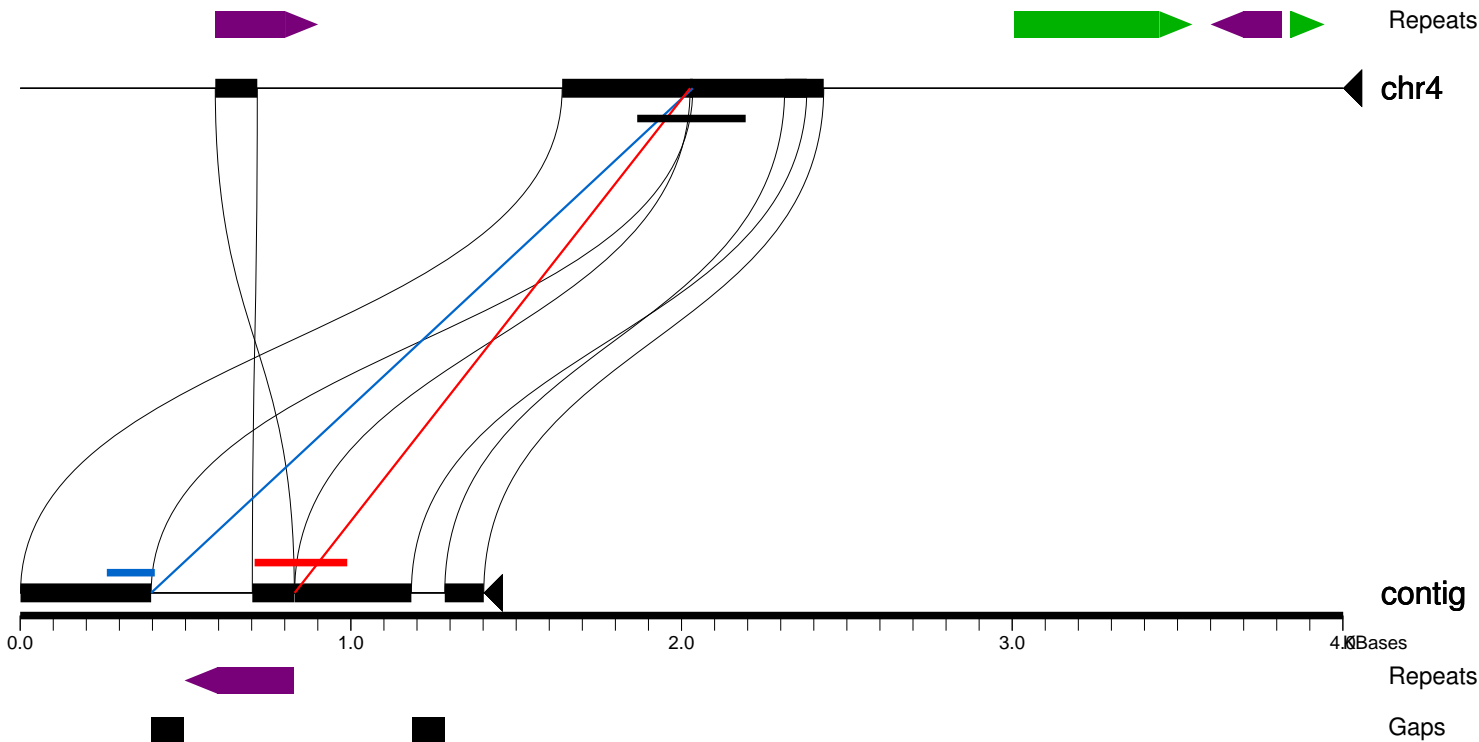



siteID: chr4\_134488146 Scafftig2 - Breakpoint: chr4:134488132

chr4:134487972-134488299

Overlap Length: 8 INS size: 302 Genotyped: Yes

```
left  TA-----GTCTTTCCCTAAAACACATAACCCAGTTTAACTTTATGAGGAACATTGGACAAAAA
chrom TACCTCTGTAGTCTTTCCCTAAAACACATAACCCAGTTTAACTTTATGAGGAACATTGGACAAAAA
right T---TTAGTAG-----AGACGGGGTTTCACCGTTTTAGCCG-----GGA----TGGTCTCGA--
*1 2NN222*111111111111*1**1111*11*1**11****11*111111***1111***1*111*11
```

```
left  CAATTAAGGGAAATTTCTACAAAACAAATGACAAATACTCTGCAAAACTGTCAAGGCCATCAGAAACAAGG
chrom CAATTAAGGGAAATTTCTACAAAACAAATGACAAATACTCTGCAAAACTGTCAAGGCCATCAGAAACAAGG
right -----TCTCCTGACCTCGTGATCCGCCCGCTCGGC-CTCCCAAAGTGCTGGGATTACAGG
1111111111111111***1*11*1*111***111111*1*11*1111***11***1*111*11***1111***
```

```
left  CCAGACTTA--GAAACTATCATGGCAAAGATTTTTTTTTTTTTTTTTTTT-----TTTGAGACGGAGTCTCGC
chrom CCAGACTTA--GAAACTATCATGGCAAAGATATATCTTAAGGAGACATGACAATTTGAATATAATGTAGTGA
right CGTGAGCCACCGCGCCCGGCC--GGCAAAGAATATCTTAAGGAGACATGACAATTTGAATATAACGTAGTGA
*11**111*11*111*111*11*****2*2*2**22222222*22222**22*2*222N**222*2
```

```
left  TCTGTCGCCCAGGCTG-GAGTGCAG-----TGGCGGGACCTCGGC---TCACTGCAAGCTCCGCCT
chrom TCTGAATGGGATGCTGAGATAGAAAAATAACTTTTGTAACTTAACTGGGAAAAATCTAAATAAATTAAGACT
right TCTGAATGGGATGCTGAGATAGAAAAATAACTTTTGTAACTTAACTGGGAAAAATCTAAATAAATTAAGACT
****222222*2****2**22*2*2222222222**22222*2**2**2222**22222**22*22*2**
```

```
left  CCCGGGTTACGCCATTC-----TCCTGCCTCA-----
chrom T--GGATTAATAACAATGAGTTAATATTGGTTTCATTAATTTCTAACAAAATGTC
right T--GGATTAATAACAATGAGTTAATATTGGTTTCATTAATTTCTAA-----
222**2**2*222**2*2222222*22**22***2222222222
```

Other Simple Repeat Low Complexity DNA LTR LINE SINE

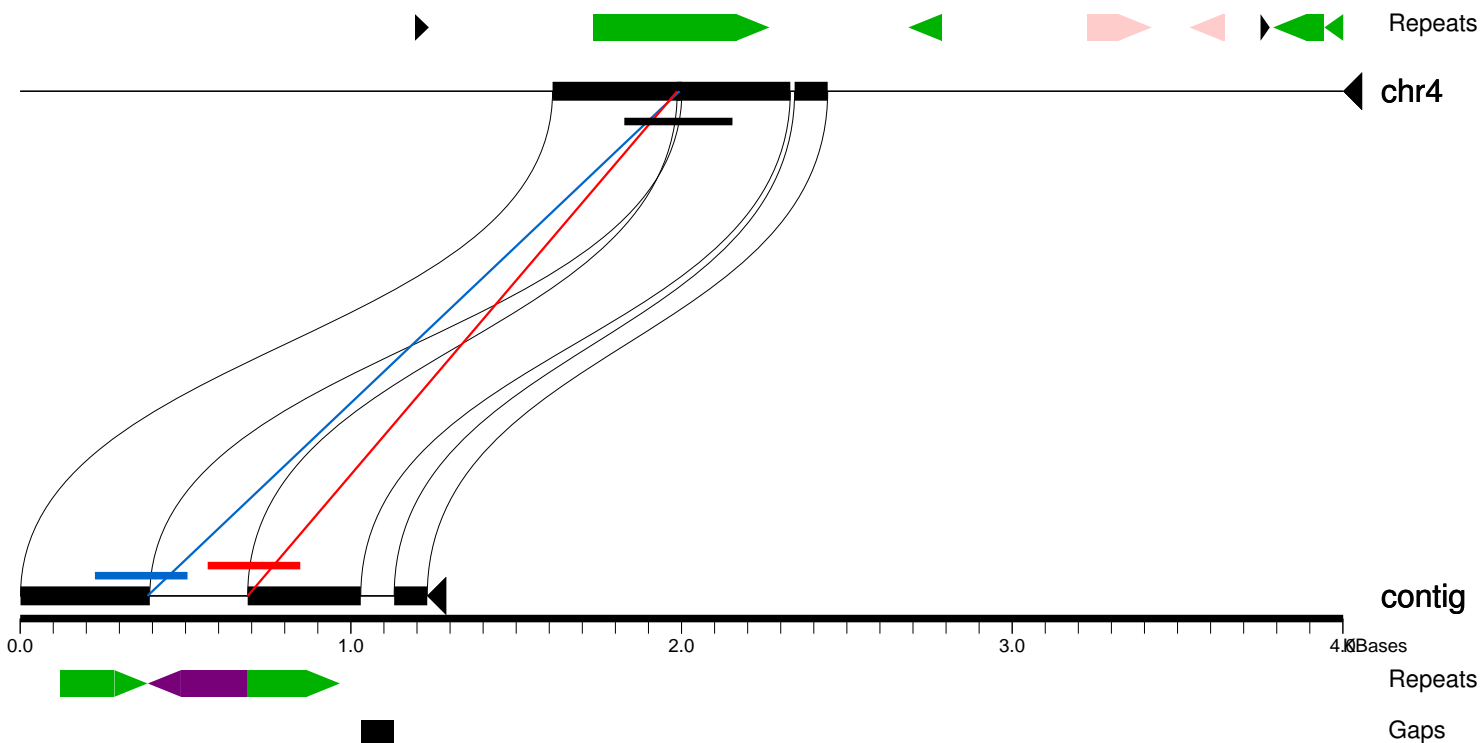

siteID: chr4\_134922337 Scafftig2 - Breakpoint: chr4:134922347

chr4:134922300-134922406

Overlap Length: 13 INS size: 294 Genotyped: Yes

```
left  ACCATCTGAGTAATTGACCTCTA-TGTTATGCTAACAGGTTTAAGCAT-----GACAAACATT
chrom ACCATCTGAGTAATTGACCTCTA-TGTTATGCTAACAGGTTTAAGCAT-----GACAAACATT
right -CCACCCGCCTCGGCCTCCCAAAGTGCTGGGATTACAGGCGTGAGCCACCCGCGCCCGGCCGACAAACATT
      1***1*1*11*111111**111*1**1*11*1*1*****11*1***1111111111111111*****
```

```
left  TTTTTTTTTTGGAC----GGAGTCTCGCTCTGTCGCCAGGCCGGACTGCGGACTGCAGTGGCGCA
chrom TTTACAAGCTGAAAAATGGGAGTAA-GCACTC-CACCCAGA--AGA----AACAGCAT-----
right TTTACAAGTTGAAAAATGGGAGTAA-GCACTC-CACCCAGA--AGA----AACAGCAT-----
      **22222N*22*22222*****222**2**22*2*****2222**222222**2***22222222
```

Other Simple Repeat Low Complexity DNA LTR LINE SINE

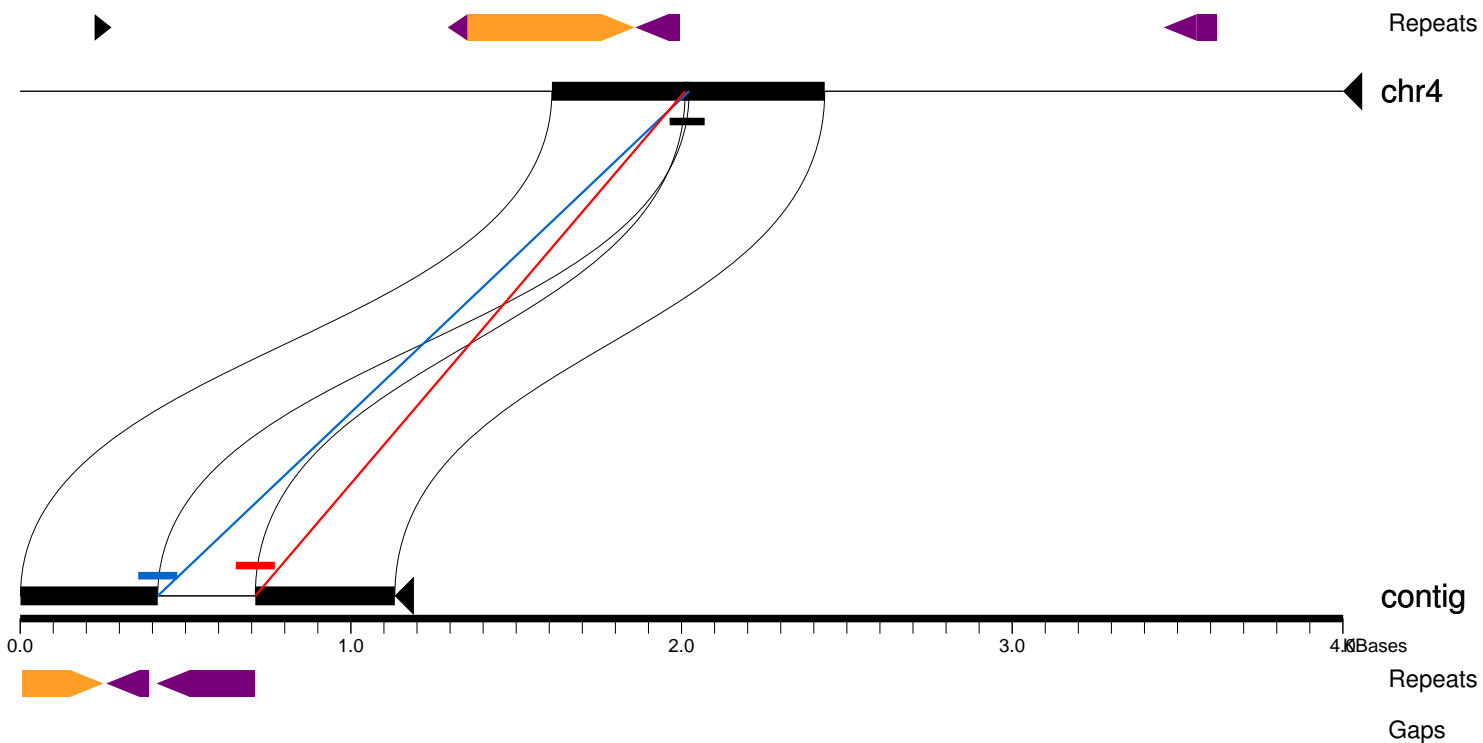

siteID: chr4\_136727591 Scafftig2 - Breakpoint: chr4:136727573

chr4:136727529-136727632

Overlap Length: 16 INS size: 428 Genotyped: No

```
left   TGTATTTTCAAAGTAACCACATGTGGTGTATATATAATAATCAT-----AGACAAGGACA
chrom  TGTATTTTCAAAGTAACCACATGTGGTGTATATATAATAATCAT-----AGACAAGGACA
right  CCACCCGCCTCGGCCTCCCAAAGTGCTGGGATTACAGGCGTGAGCCACCGCGCCCGGCCAGACAAGGACA
      111111111*111*111**11*1***1**1111**1*1111*1*11111111111111111**
left   TTTC TT TTTNNNNNNNNNNNNNNNNNNNNNNNNNNNNNNNNNNNNNNNNNNNNNNNNNNNNNN
chrom  TTTC TATAATTAGTTCAATTTGTCTGTTAAGAGGAAAAAGACCTATGGAT-----
right  TTTC TATAATTAGTTCAATTTGTCTGTTAAGAGGAAAAAGACCTATGGAT-----
      ***2*22**2222222222222222222222222222222222222222222222222222222
```

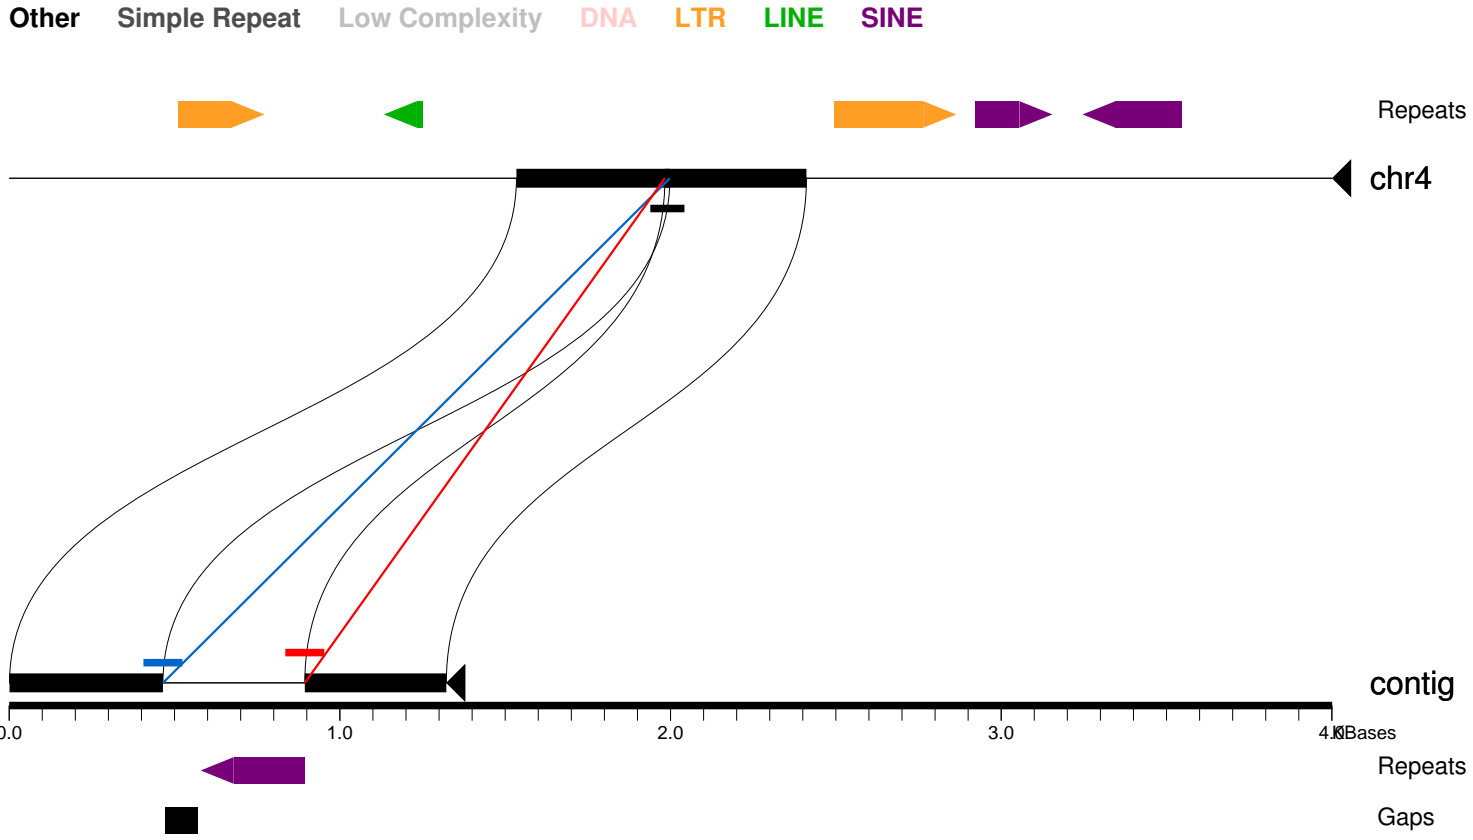

siteID: chr4\_137019282 Scafftig2 - Breakpoint: chr4:137019269  
chr4:137019109-137019437  
Overlap Length: 9 INS size: 427 Genotyped: No

```

left      A-----GTAACCGAATGCAGTTATGACTGCACATTCATTTA
chrom
right    AAATAAATGCAATTTTATGAATTTAGTTCCTTTAGTAACCGAATGCAGTTATGACTGCACATTCATTTA
          T--TTAGTAGAG---ACGGGGTTTCA---CCTT--GTTAGC-----CAGGATGGTCTCGAGCTCC--TGA
          1 2N2N2NN2N  2N2NNN2N2N2  2222  **1*1*11111***1111*1**11*11*1*11*1*
left      AGACATGTTATACAAAACCTTTATGGAAATAAAAAGTTTTTCATTTTAGATGGGCAGACATAAGAAAATGTATT
chrom
right    AGACATGTTATACAAAACCTTTATGGAAATAAAAAGTTTTTCATTTTAGATGGGCAGACATAAGAAAATGTATT
          CCTCATGATCCACCCGCTCG--GCCTCCCAAAGTGTGGGATTA-----CAGGCGTGAGCCACC-----
          111****1*11**1111**1111*111111****11*1111***111111***1*1*1**11*111111
left      AAAATACTTTGATAACAAAATAGCCATTA TNNNNNNNNNNN-----
chrom
right    AAAATACTTTGATAACAAAATAGCCATTA TCTTTTAAAT TAAATGTGGGACAGAGA AACTATAACCAAAAAT
          -----GCGCCCGGCCAGCCATTA TCTTTTAAAT TAAATGTGGGACAGAGA AACTATAACCAAAAAT
          1111111111*1111*1111 ****** 2222222222222222222222222222222222222222222222222
left      -----
chrom
right    TTCCTTTCTATTTTTGATAGCTAAATATGGTTACAGTTAAGGTTCTTTGTGATCATCTGTTCAACTTGAG
          TTCCTTTCTATTTTTGATAGCTAAATATGGTTACAGTTAAGGTTCTTTGTGATCATCTGTTCAACTTGAG
          2222222222222222222222222222222222222222222222222222222222222222222222222222222
left      -----
chrom
right    TAGCTATATAATCCAGGTTCTTTTATTAGAAA AACTATTTTTTGGAAATAAGG
          TAGCTATATAATCCAGGTTCTTTTATTAGAAA AACTATTTTTTGGAAATAAGG
          22222222222222222222222222222222222222222222222222222222222222222222222222

```

Other Simple Repeat Low Complexity DNA LTR LINE SINE

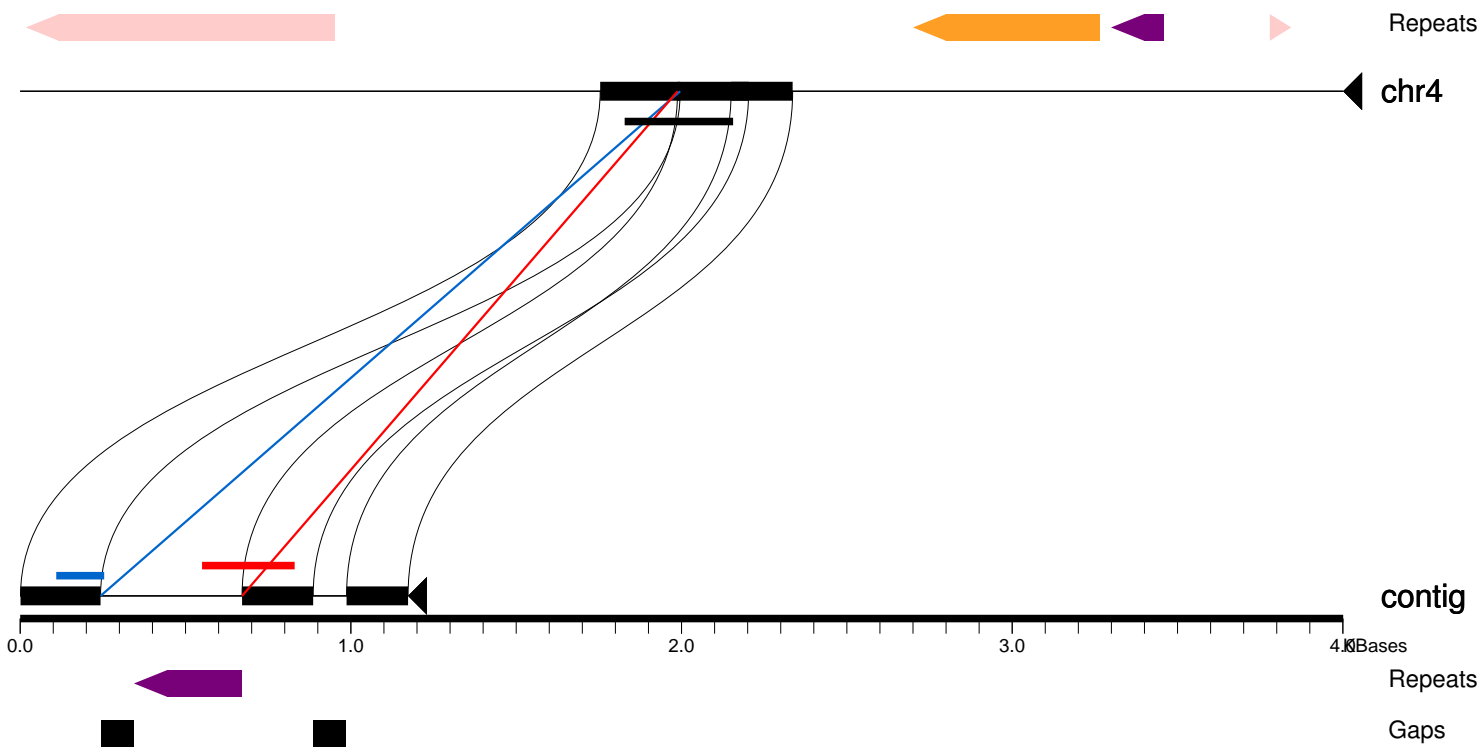

siteID: chr4\_137806434 Scafftig1 + Breakpoint: chr4:137806516

chr4:137806465-137806548

Overlap Length: 9 INS size: 139 Genotyped: Yes

```

left    T-----TTCAC-----CTTTACTTACTAGAAATTAATAATAATA
chrom   T-----TTCAC-----CTTTACTTACTAGAAATTAATAATAATA
right   AGATCCCGCCACTGCACCTCCAGCCTGGGGCGACAGAGCGAGACTCCGTCTCAAAAAAAAAAAAAAAAAA
111111111111*1***11111111111111111111111111111111**1111**1*11*1**11*****1*1*
  
```

```

left    TATTTACATTATCTATAAAAAATGATGGCTGAGGCAGGAGAAATGGCGTGAACCCGGGAGGCGGAGTTTGCA
chrom   TATTTACATTATCTATAAAAATGAT-----AAAGTAGT--ACCTAAAAGT-----TTTACA
right   AAAAAAAAAAAAAAAAAAAAAAATGAT-----AAAGTAGT--ACCTAAAAGT-----TTTACA
1*111*1*11*111*1******222222222222**2*22**22***2222**222222***2**
  
```

```

left    GTGAGCCGAGATCC
chrom   -----
right   -----
22222222222222
  
```

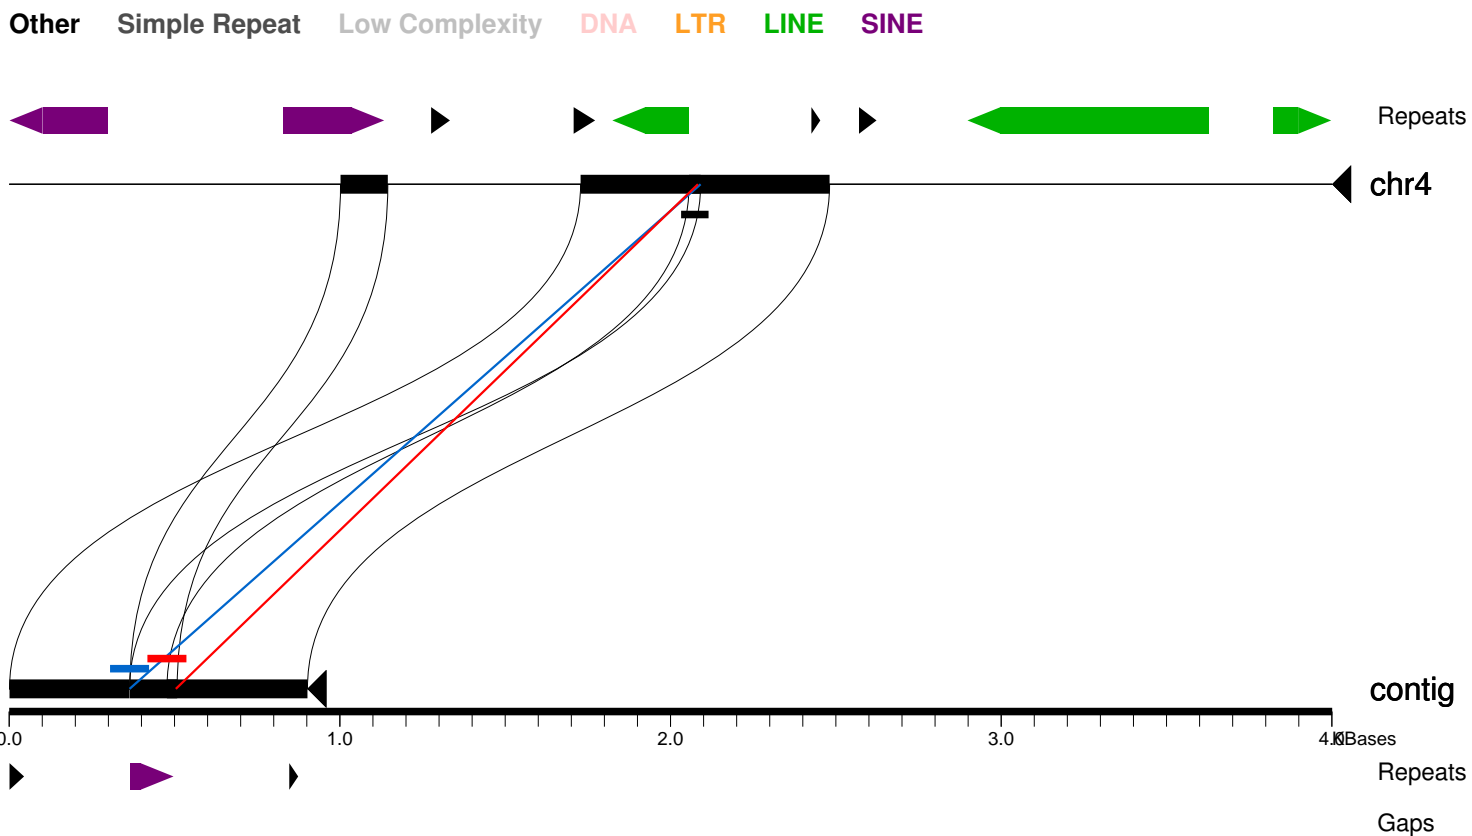





siteID: chr4\_139225219 Scafftig6 - Breakpoint: chr4:139225200

chr4:139225040-139225377

Overlap Length: 18 INS size: 428 Genotyped: No

```

left      -----TCTGCATACTGTATACTACACCTAAC
chrom      GGTGATCATTGGAGGCCATCTTAAAAGGCTACCTATGGCTGACTTCTGCATACTGTATACTACACCTAAC
right     TTTAGTAGA--GACGGGGTTTCACCGTGTAGCCA-GGATGG--TCTCGAT-----CTCCTGAC
          NN2NN2NNN  22N2NNN2N2N2NNNN2N22N2N2  22N22N  ***11**111111111111*1***1**
  
```

```

left      TTCCTTTCCAACATTCCTGAGAGTCA-AGAGTGTFTTTTAGTATTAGCATATGCTTTATTTCCAGTAAA
chrom      TTCCTTTCCAACATTCCTGAGAGTCA-AGAGTGTFTTTTAGTATTAGCATATGCTTTATTTCCAGTAAA
right     CTCGTGATCCGCCCGCCTCGGCCTCCCAAAGTGTG----GGATTACAA---GCGTGAG---CCAC----
          1**1*111*11*111***11*11**11*1***1*111111*1***11*111*1*1*1111***111111
  
```

```

left      TACTTGTATGACATTGCTATAAGATGTFTTAAAACTCTT-----
chrom      TACTTGTATGACATTGCTATAAGATGTFTTAAAACTCTTAAAAGATAACAGTATATGTTAAAAAAAAAAAA
right     --CGCGCCCAGCCT-----AGATGTFTTAAAACTCTTAAAAGATAACAGTATATGTTAAAAAAAAAAAA
          11*11*111*1*1*1111111*1*****1111111111111111111111111111111111111111
  
```

```

left      -----
chrom      AAAGGACAAGAGTTAAGCAAATCATTCCGGAGATGTGTCTACTAACGGTCTGGGGGTCTGTGTAAAAGGACAA
right     AA-GGACAAGAGTTAAGCAAATCATTCCGGAGATGTGTCTACTAACGGTCTGGGGGTCTGTGTAAAAGGACAA
          22  222222222222222222222222222222222222222222222222222222222222222222
  
```

```

left      -----TNNNNNNNNNNN
chrom      GGCAGCATTATCCTGTGACAAGAGCAACGACTTGTFTTTATAATTCCCTTCAGACTGATTC
right     GGCAGCATTATCCTGTGACAAGAGCAACGACTTGTFTTTATA-----
          222222222222222222222222222222222222222222222222222222222222222222
          1NNNNNNNNNNN
  
```

Other   Simple Repeat   Low Complexity   DNA   LTR   LINE   SINE

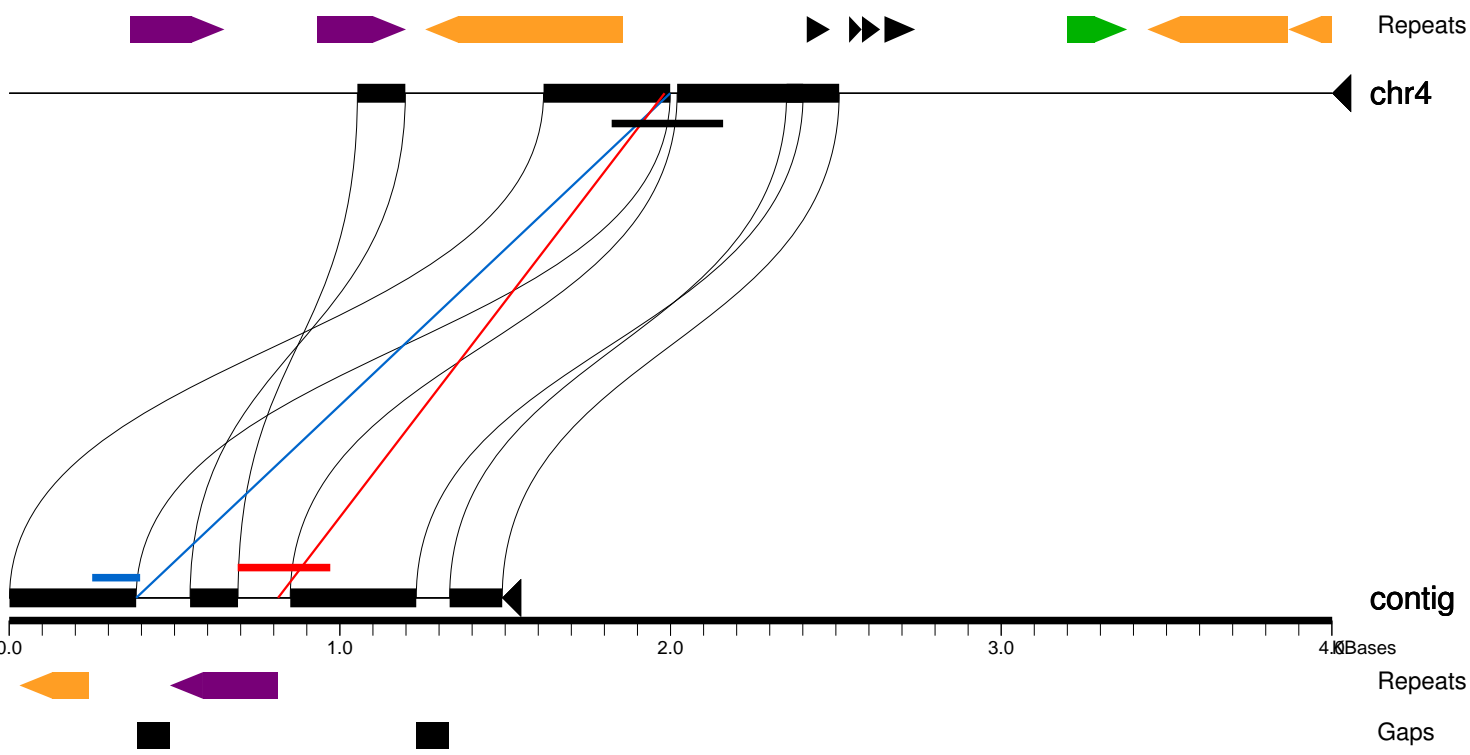

siteID: chr4\_140938924 Scaffitig16 - Breakpoint: chr4:140938921

chr4:140938876-140938980

Overlap Length: 15 INS size: 136 Genotyped: Yes

```
left  A--CATTCTTGAAATGACAAAAT-----TATAAAAAATGAGTATCTAGTGGTTAAGAAAGGGGG
chrom A--CATTCTTGAAATGACAAAAT-----TATAAAAAATGAGTATCTAGTGGTTAAGAAAGGGGG
right CTGCACTCCAGCCTGGGCGACAGAGCGAGACTCCGTCTCAAAAAAAAAAAAAAAAAAAGAAGAAAGGGGG
      111**1**11*1111*1*1*1*1111111111111*1*1****11*11*111*111111******
```

```
left  ATAGCAGCTACTTGGGAG--GCTGAGGCAGGAGAATGGCGTGAACCCGGGAGGCGGAGCTTGCAG
chrom ATAGAGGAAAAATAGGTGTAGCTATAACAGGGCAATA---TGA-----GAGATT-CTA
right ATAGAGGAAAAATAGGTGTAGCTATAACAGGGCAATA---TGA-----GAGATT-CTA
      ***22*22*22*2**2*22***2222***22***2222***222222222222***2**2*22
```

Other Simple Repeat Low Complexity DNA LTR LINE SINE

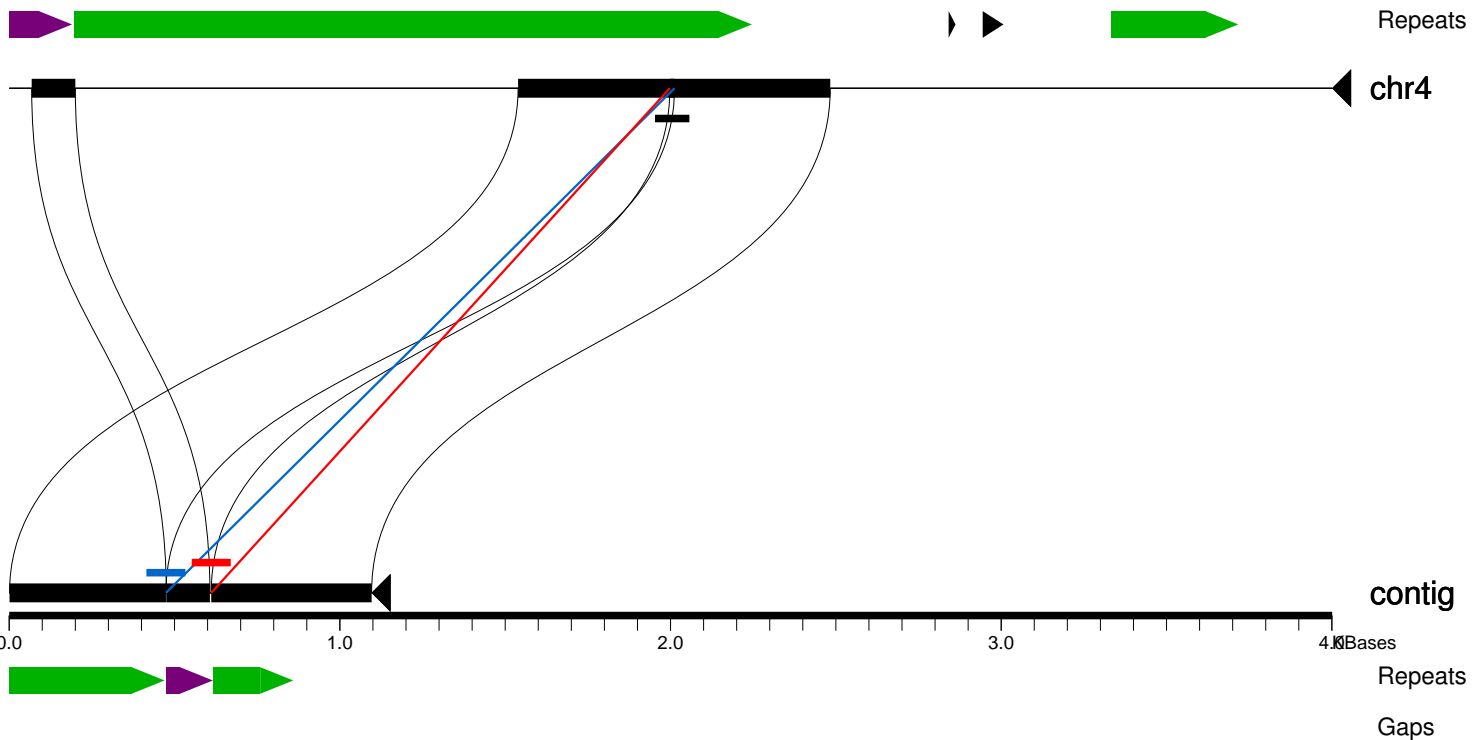

siteID: chr4\_143258314 Scafftig1 + Breakpoint: chr4:143258301

chr4:143258256-143258360

Overlap Length: 15 INS size: 298 Genotyped: Yes

```
left  TAACTCAATTT---CTTTTAGATT-----TATCCATGTTGTTGCATACAGCTA-----AAGTACATTTA
chrom TAACTCAATTT---CTTTTAGATT-----TATCCATGTTGTTGCATACAGCTA-----AAGTACATTTA
right CCGCCCGCCTCGGCCTCCCAAAGTGCTGGGATTACAGGCGTGAGCCACCGCGCCCGGCCAAGTACATTTA
      111*1*111*1111**111*1*1*111111**1111*11**11111**1**11111111*****
```

```
left  TTTTTTTTTTTTTTTTTTTTTTTGGAGATGGAGTCTCGCTCTGTCGCCAGGCTGGAATGCAGTGG---
chrom TTTTCAT-----TGTCAGAT--AGTAATTCATTG----CCTGACTGTACTACAATTTATC
right TTTTCAT-----TGTCAGAT--AGTAATTCATTG----CCTGACTGTACTACAATTTATC
      ***22*222222222222*2*2***22***2222*22**2222**2*2***2*2*2**2*22222
```

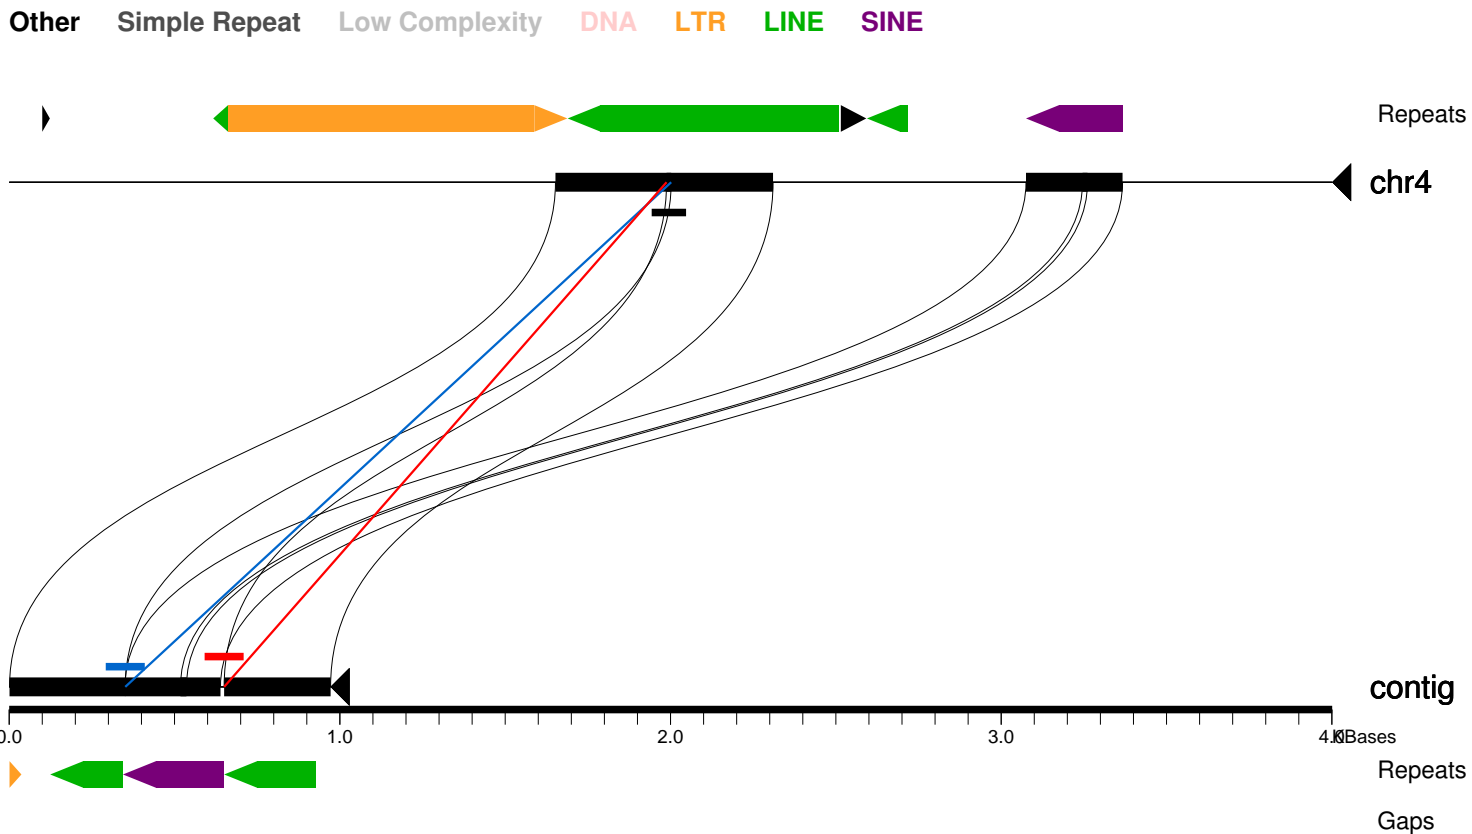

siteID: chr4\_145395313 Scafftig6 - Breakpoint: chr4:145395297

chr4:145395249-145395351

Overlap Length: 12 INS size: 322 Genotyped: Yes

```
left  C-----ATTTTGCCCCAGCAGTATGTTAGCTATTTATCTGAGGAGGATAAAAA-----CACATT
chrom C-----ATTTTGCCCCAGCAGTATGTTAGCTATTTATCTGAGGAGGATAAAAA-----CACATT
right GCGACAGAGCGAGACTCCGTCTCAAAAAAAAAAAAAAAAAAAAAAAAAAAAAAAAAAAAAAAAAAACACATT
      11111111111111111111*1*11*1*1*11*11*1111*111*111*1111*11*11*1*****1111******
```

  

```
left  ACCATAAGGCCGGGCGCGGTGGCTCACGCCTGTAATCCCAGCACTTTGGGAGGCCGAGGCGGGCGG
chrom ACCATAA-----AAACCATATGTAAATGTTTATAGCAATGCACAATTGGAAGCT-----
right ACCATAA-----AAACCATATGTAAATGTTTATAGCAATGCACAATTGGAAGCT-----
      *****222222222*22*222*2*2222*222*2*222*****22*2***2**222222222222
```

Other Simple Repeat Low Complexity DNA LTR LINE SINE

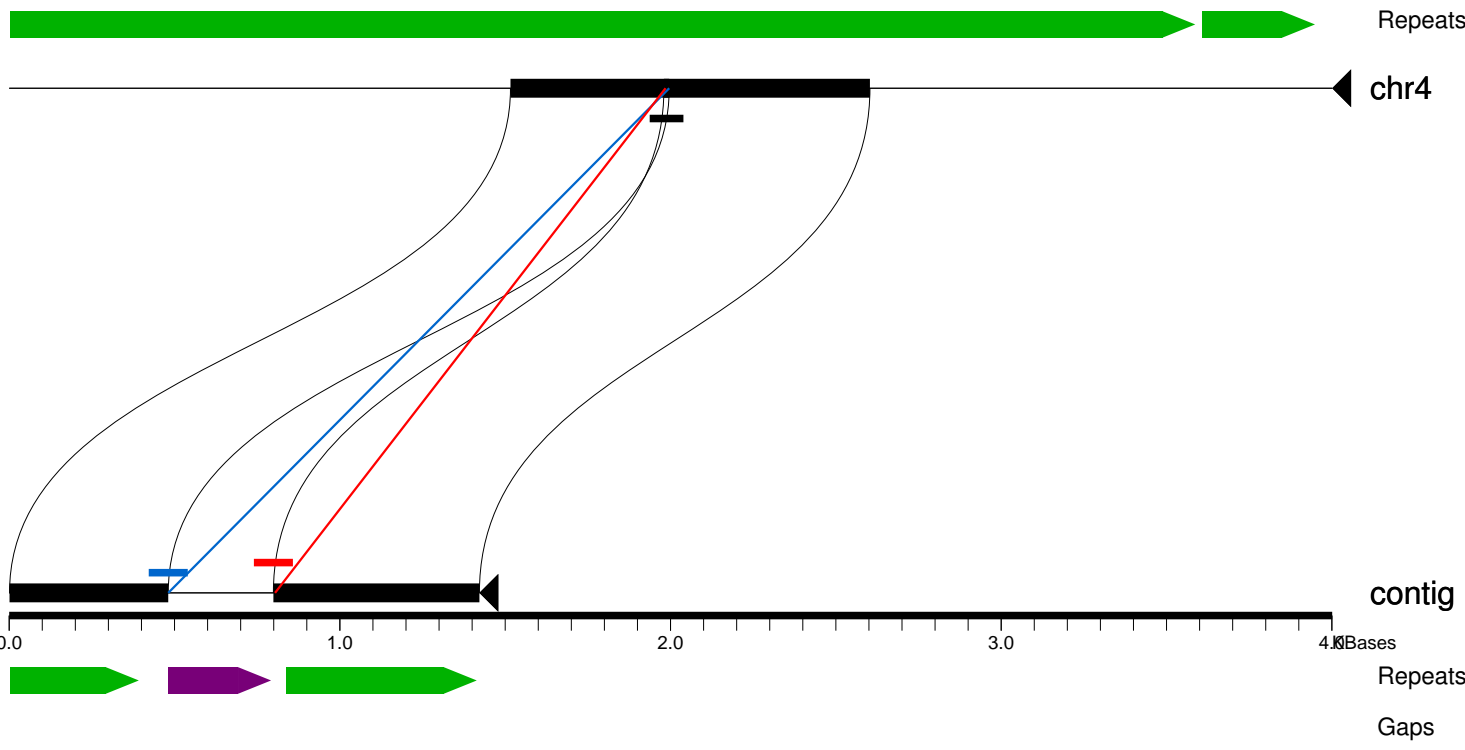

siteID: chr4\_147351169 Scafftig1 - Breakpoint: chr4:147351174

chr4:147351129-147351195

Overlap Length: 15 INS size: 321 Genotyped: Yes

```
left      -----ACTATAC-----AAAAAAAAATCA
chrom    -----ACTATAC-----AAAAAAAAATCA
right    GTGAGCCGAGATCCCGCCACTGCCTCCAGCCTGGGCGACAGAGCGAGACTCCGTCTCAAAAAAAAAA
          11111111111111111111***11**1111111111111111111111111111111111111111111111*****211*
```

```
left      TTCAAAACGGATCACAGGACTAAATGTAAAAACAATAAGGGCCGGCGCGGTGGCTCACGCCTGTA
chrom    TTCAAAACGGATCACAGGACTAAATGTAAAAACAATAAGGGCCGGCGCGGTGGCTCACGCCTGTA
right    AAAAAAAAAAAAAAAAAAAAAAAAAAAAAAAAAAA*AAAAAAAAAATAAA-----
          111***111*11*1*11*11***111*****1*****222222222222222222222222222222222222
```

```
left      ATCCAGCACTTTGGGAGGCCGAGGCGGGCG
chrom    -----ACTTAT-----
right    -----ACTTAT-----
          22222222***222222222222222222222222222222222222
```

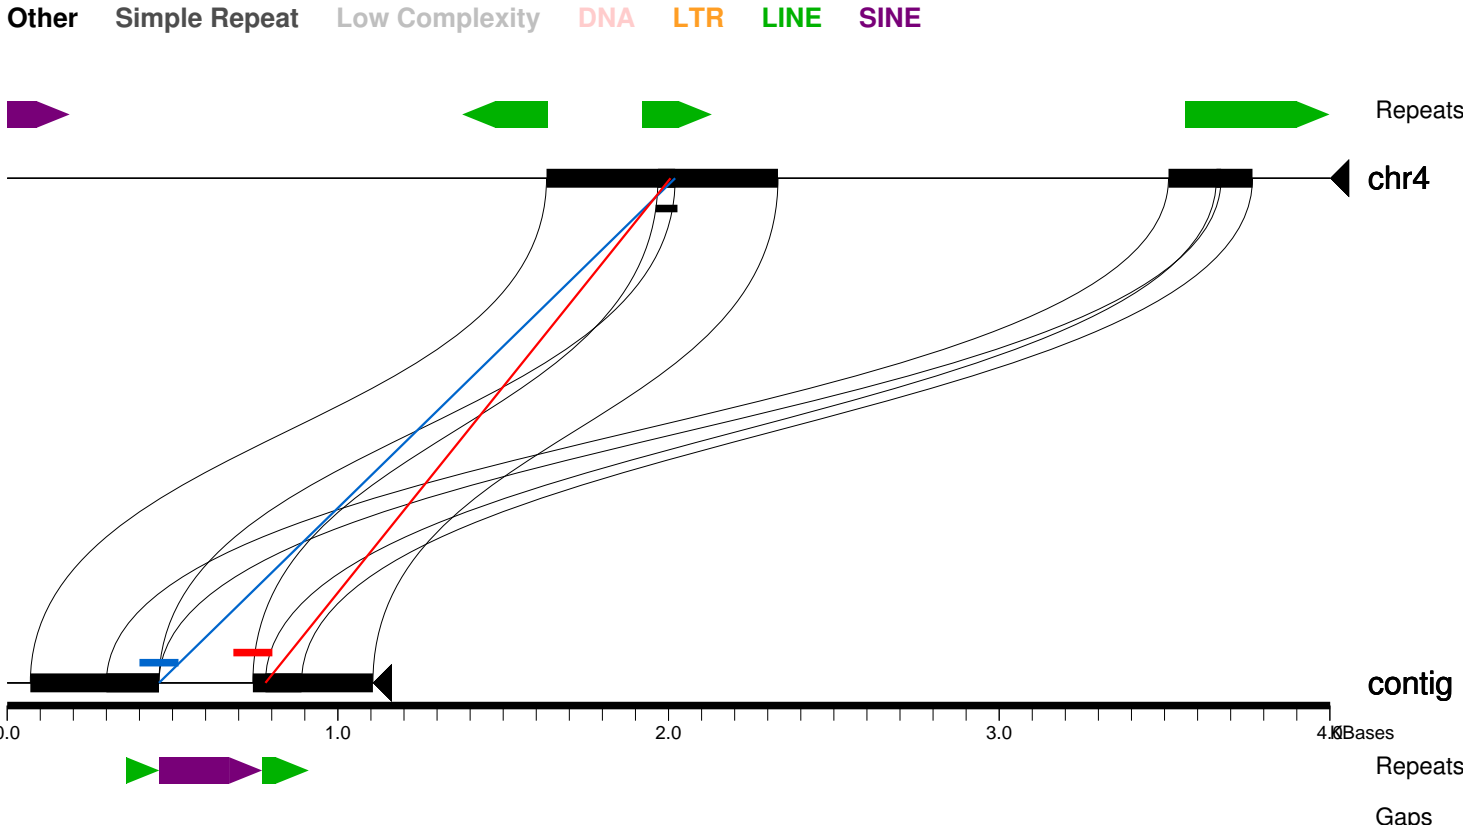





siteID: chr4\_156534792 Scaffoldig1 - Breakpoint: chr4:156534800

chr4:156534756-156534859

Overlap Length: 16 INS size: 313 Genotyped: Yes

```
left   C----CAATTAATATGTAC-CTGGCACACACACAAGTGAGCAGATTTTT-----AAAAAATCTGA
chrom  C----CAATTAATATGTAC-CTGGCACACACACAAGTGAGCAGATTTTT-----AATAAATCTGA
right  CTGGGCGACAGAGCGAGACTCCGTCTCAAAAAAAAAAAAAAAAAAAAAAAAAAAAAAAAAAATAAATTTGA
       *1111*1*111*11111**1*1*1*1**1*1*1**111*11*1*111111111111111111**1***

left   GTAACGGCCGGGCGCGGTGGCTCACGCCGTGTAATCCCAGCACTTTGGGAGGCCGAGGCGGGCGG
chrom  GTAACACTTTTCGACAGGA-----AAGAAGATAAACCTAACATCTTAT--GGCATAA-----
right  GAAACACTTTTCGACAGGA-----AAGAAGATAAACCTAACATCTTAT--GGCATAA-----
       *1**222222*222**222222*2*2222***2*2*2**22**2222***22*2222222222
```

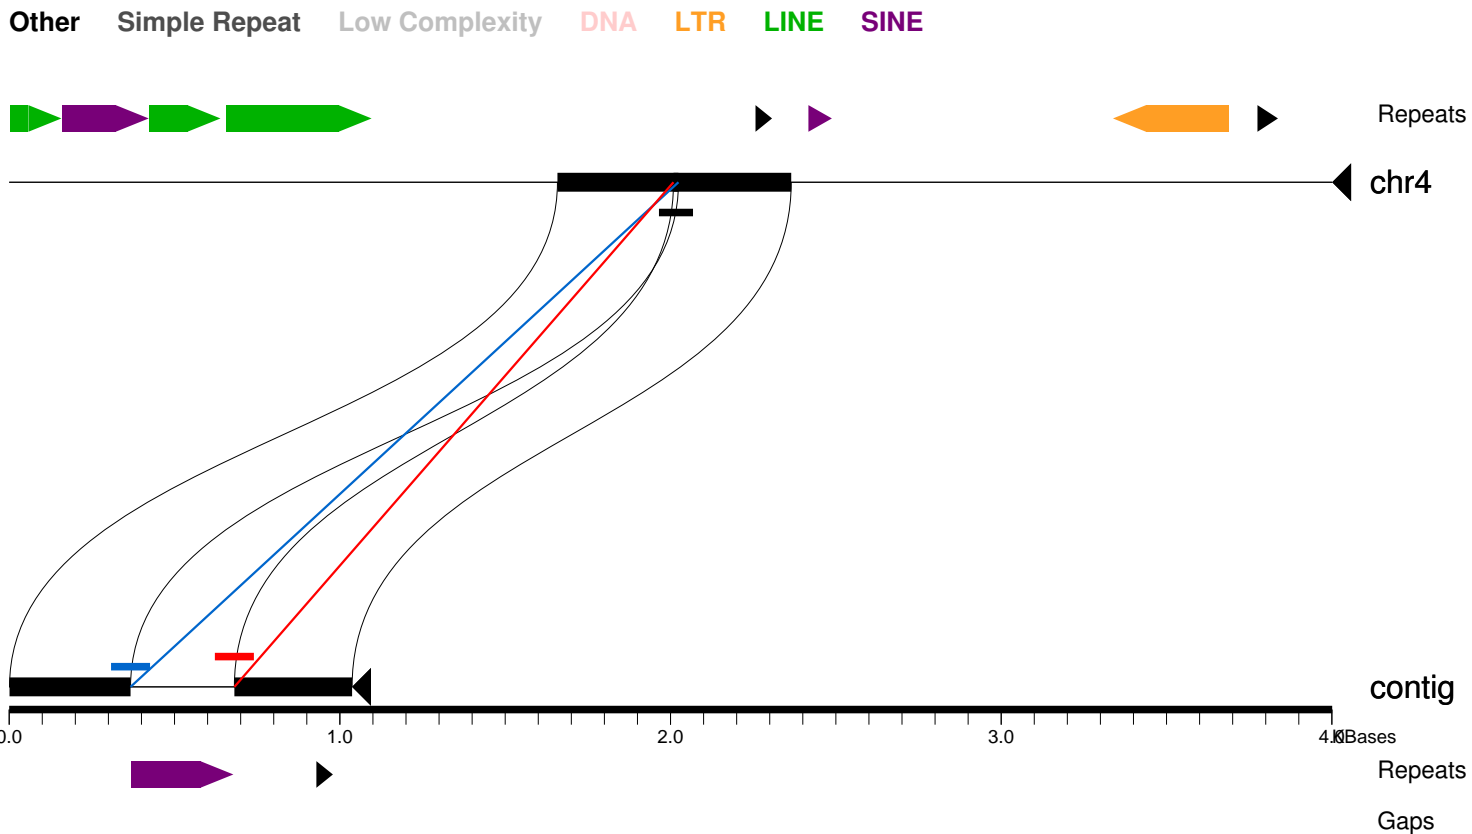



siteID: chr4\_160626066 Scafftig1 + Breakpoint: chr4:160626037

chr4:160625989-160626096

Overlap Length: 12 INS size: 443 Genotyped: No

```
left  AG-----TGAGGTGCGGTATGTGCTCCATGTATCCAGGACAGAAACACT-----CTTCTCTCATT  
chrom AG-----TGAGGTGCGGTATGTGCTCCATGTATCCAGGACAGAAACACT-----CTTCTCTCATT  
right TCCACCCGCCTCGGCCTCCCAAAGTGCTGGGATTA--CAGGCGTGAGCCACCGCGCCCGGCCTCTCATT  
11111111111*11*111*111*1*****11111**11****111**11***111111*111*****
```

```
left  CTTTTTTNNNNNNNNNNNNNNNNNNNNNNNNNNNNNNNNNNNNNNNNNNNNNNNNNNNNNNNNNNNN  
chrom CTTAT-----AATCACAATTTTTGCCATAGTAATTGATACTGAATATCCTAAAGGA  
right CTTAT-----AATCACAATTTTTGCCATAGTAATTGATACTGAATATCCTAAAGGA  
***2*22222222222222222222222222222222222222222222222222222222222222222222
```

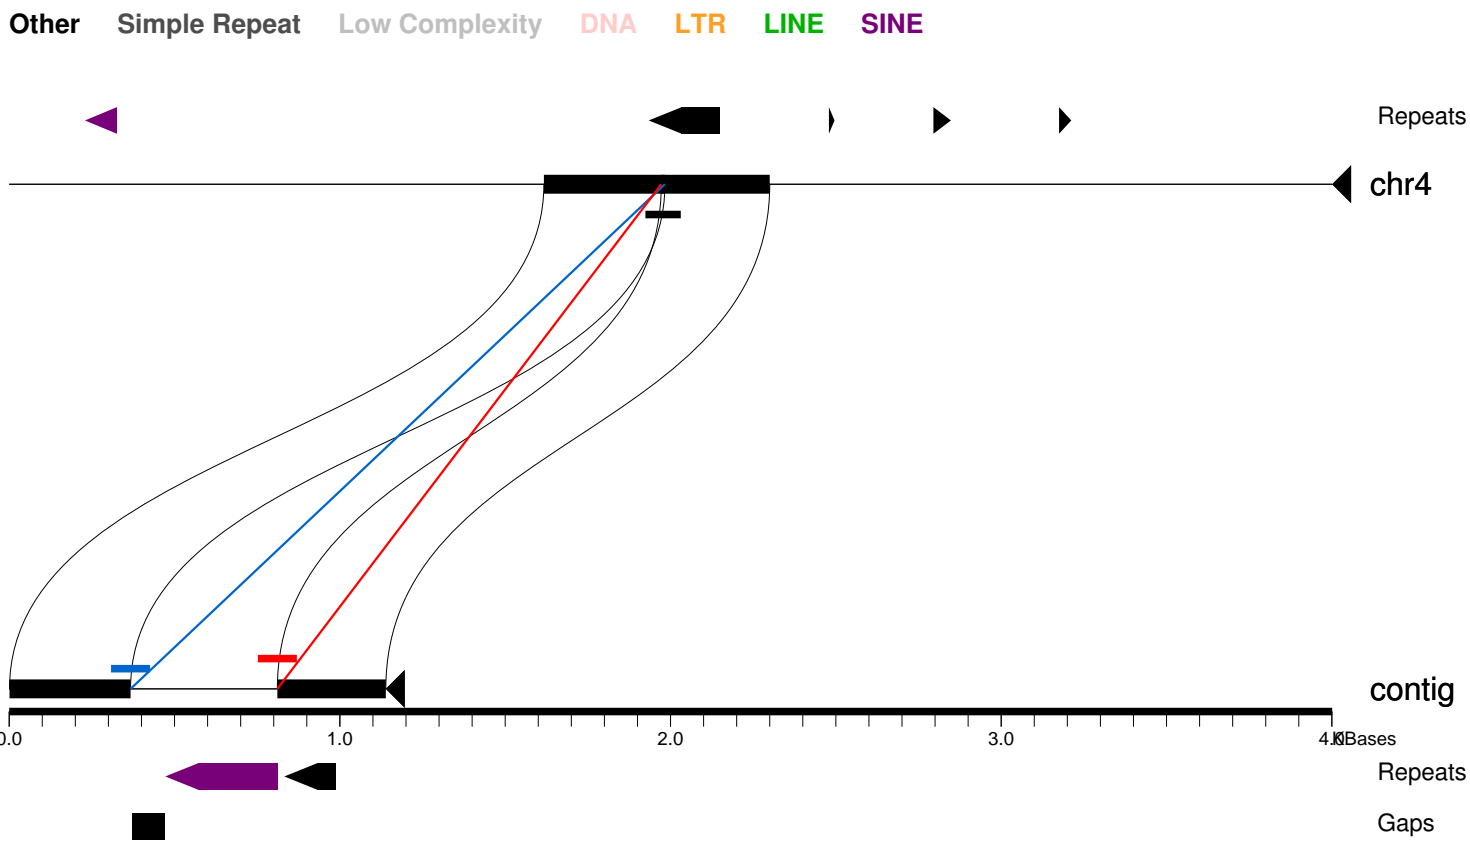

siteID: chr4\_162052450 Scafftig1 - Breakpoint: chr4:162052428

chr4:162052376-162052487

Overlap Length: 8 INS size: 330 Genotyped: No

```
left  ----GAAACATCATGTGCAAAATCA--AGAAGCTGCTATT-ATAGCTGCAGAAGTCTATAACCATGCCNNN
chrom ----GAAACATCATGTGCAAAATCA--AGAAGCTGCTATT-ATAGCTGCAGAAGTCTATAACCATGCCACA
right CCGGGCTAATTTTTTTTGTATTTTTTAGTAGAGACGGGGTTTCACCGTTTTAGCTGGGATGACCATGCCACA
      1111*11*11*11*1**1*111*1*11***11*1*111**1*11*1*11**11*11111*****222

left  NNNNNNNNNNNNNNNNNNNNNNNNNNNNNNNNNNNNNNNNNNNNNNNNNNNNNNNNNNNNNNNNNNNNNNNNN
chrom TTTTCTACTATCAAGAAGCCATCTCTGCCAAATCAGCTAGCCTCAGAGA-----
right TTTTCTACTATCAAGAAGCCATCTCTGCCAAATCAGCTAGCCTCAGAGA-----
      22222222222222222222222222222222222222222222222222222222222222222222
```

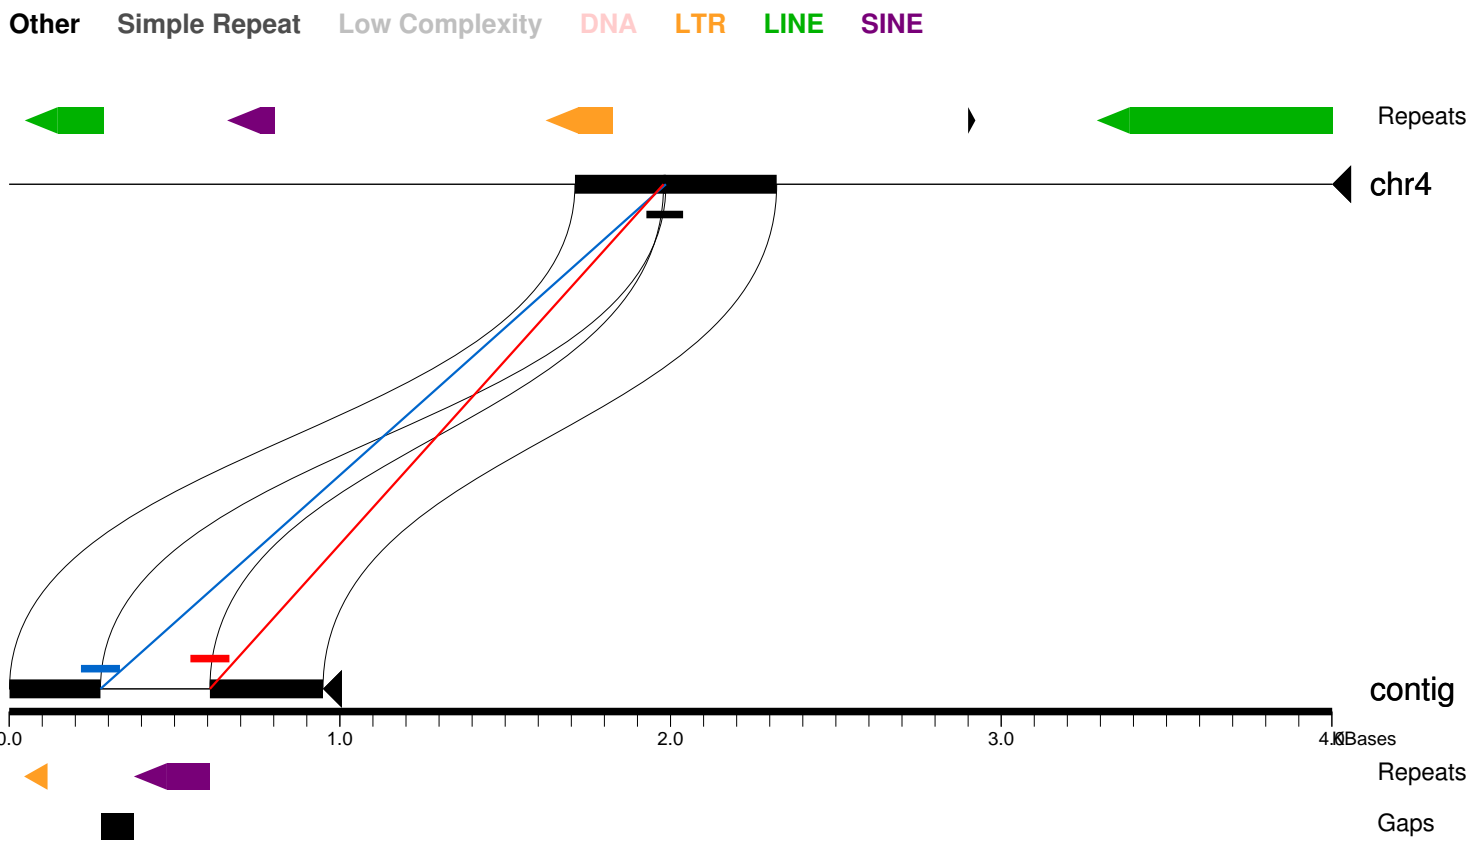

siteID: chr4\_162593899 Scafftig1 + Breakpoint: chr4:162593911

chr4:162593864-162593970

Overlap Length: 13 INS size: 429 Genotyped: No

```

left  AAAAA-----AACCCAAAAATCTAAAAAAAAAAAAA-GAAAGGTGTTTATT--GATTTTAAGTAATTT
chrom AAAAA-----AACCCAAAAATCTAAAAAAAAAAAAA-GTAAGGTGTTTATT--GATTTTAAGTAATTT
right CCGCCCGCCTCGGCCTCCCAAAGTGCTGGGATTACAGGCGTGAGCCACCGCGCCCGGCCTTAAGTAATTT
      11111111111111111111*****111**111*11*1*111*21**111111111111*111*****

```

```

left  TTTTTTTTTTTTTTTTTTTTTTTTTTTTTTTTTTTTTTTTTTTTTTTTTTTTTTTTTTTTTTTTTTTTTTTT
chrom TTTTAAATTAGAAACTGAACATTTCTTAAGCCTACAATTGTTGCCATACA-----
right TTTTAAATTAGAAACTGAACATTTCTTAAGCCTACAATTGTTGCCATACA-----
      **22222222222222222222222222222222222222222222222222222222222222222222

```

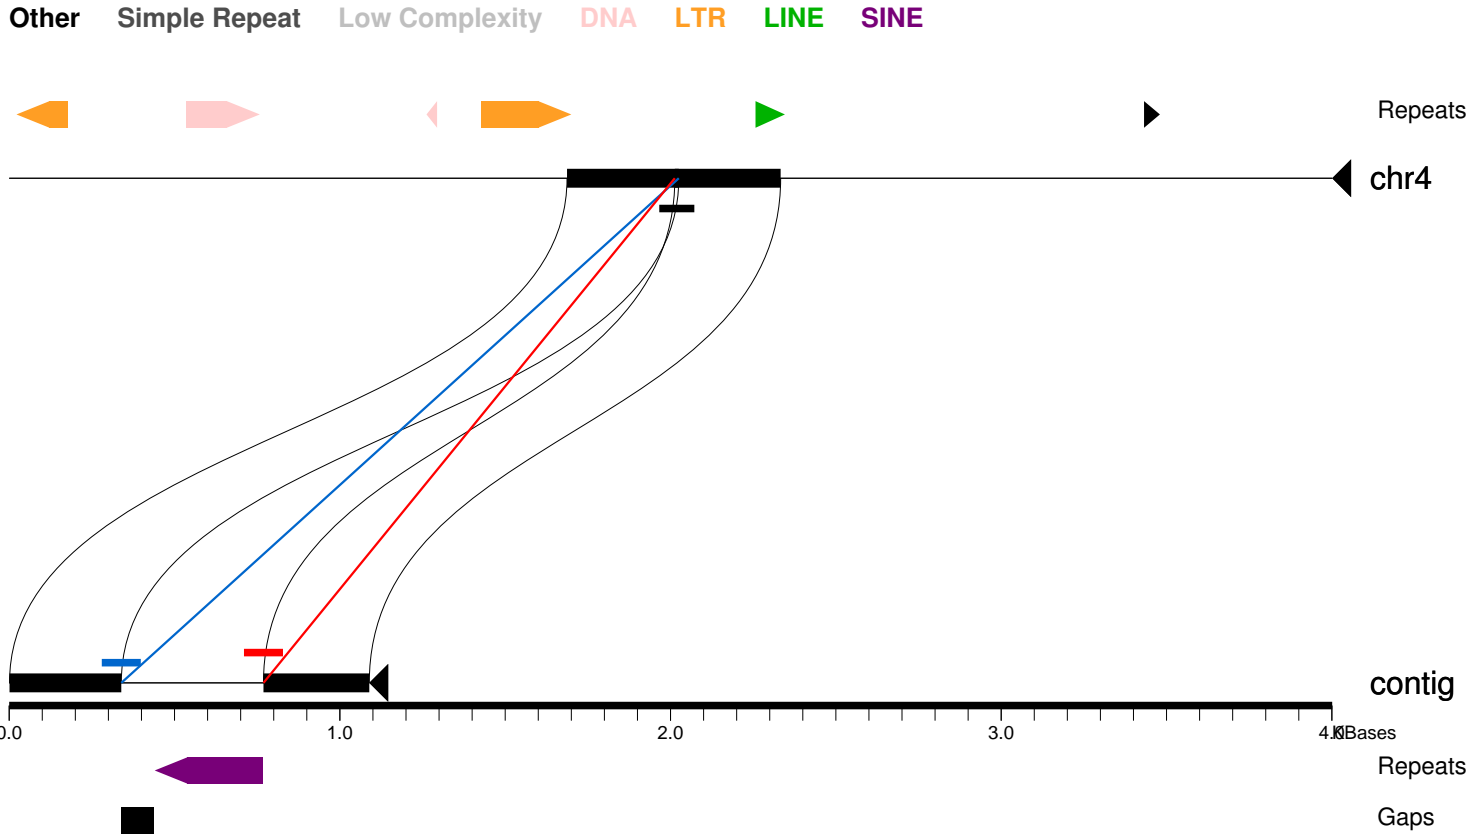



siteID: chr4\_165034138 Scaffitig5 - Breakpoint: chr4:165034142

chr4:165034089-165034201

Overlap Length: 7 INS size: 272 Genotyped: Yes

```
left  ATGTATTTTCAAATTCCTG--AAAATAAGATATTACCAATCAAATACCCATTAAAC-----AATTGCAC
chrom ATGTATTTTCAAATTCCTG--AAAATAAGATATTACCAATCAAATACCCATTAAAA-----AATTGCAA
right --GCACTC-CAGCCTGGGCGACAGAGCGAGACTCCGTCTCAAAAAAAAAAAAAAAAAAAAAAAAAAGCAATTGCAA
      11*1*1*11**111*11*11*1*1111**1*1*1*111*****1*111*11***211111111*****2
```

```
left  -----TTTGGGAGGCCGAGGCGGGCGGA---TCACGAGGTCAGGAGATCGAGACCATCCCGGCTAA
chrom ATAAATTTGACAAATTAAAGAATGATATCTTTCTTGGCTCAGGATAGTGAG-----
right ATAAATTTGACAAATTAAAGAATGATATCTTTCTTGGCTCAGGATAGTGAG-----
      22222****22*22222*2*222*2222222**2222*2*****2*22***22222222222222
```

Other Simple Repeat Low Complexity DNA LTR LINE SINE

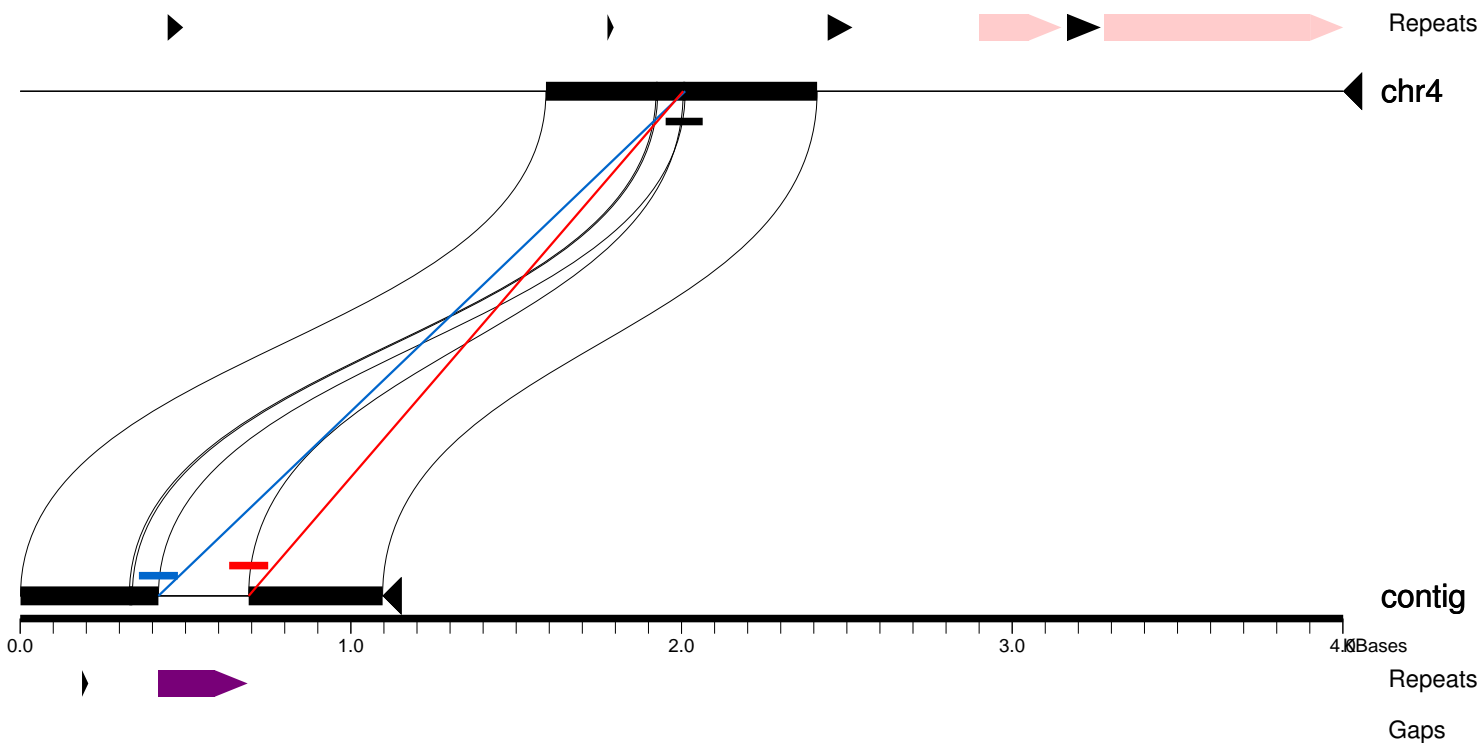

siteID: chr4\_16728121 Scaffitg1 - Breakpoint: chr4:16728066

chr4:16728019-16728125

Overlap Length: 13 INS size: 372 Genotyped: No

```
left  ATTTATGCATG-----CACCAGATCCAGGCAG-GTGCTCTATCCTCAATAA-----ATACATTTATATT
chrom ATTTATGCATG-----CACCAGATCCAGGCAG-GTGCTCTATCCTCAATAA-----ATACATTTATATT
right TGTTAGCCAGGATGGTCTCGATCTCCTGACCTCGTGATCCGCCCGCCTCGGCCTCCCAAACATTTATATT
      11***11**1*111111*1*1*11***1*1*111***1**111**1*11111111111*1*****
```

```
left  TTTTNNNNNNNNNNNNNNNNNNNNNNNNNNNNNNNNNNNNNNNNNNNNNNNNNNNNNNNNNNNNNNNNNNNN
chrom TTAGTACATGCAAAATAACAGGAGGCAAGGAATATGAGAAGAAAACCTGC-----
right TTAGTACATGCAAAATAACAGGAGGCAAGGAATATGAGAAGAAAACCTGC-----
      **22*22222222222222222222222222222222222222222222222222222222222222222222
```

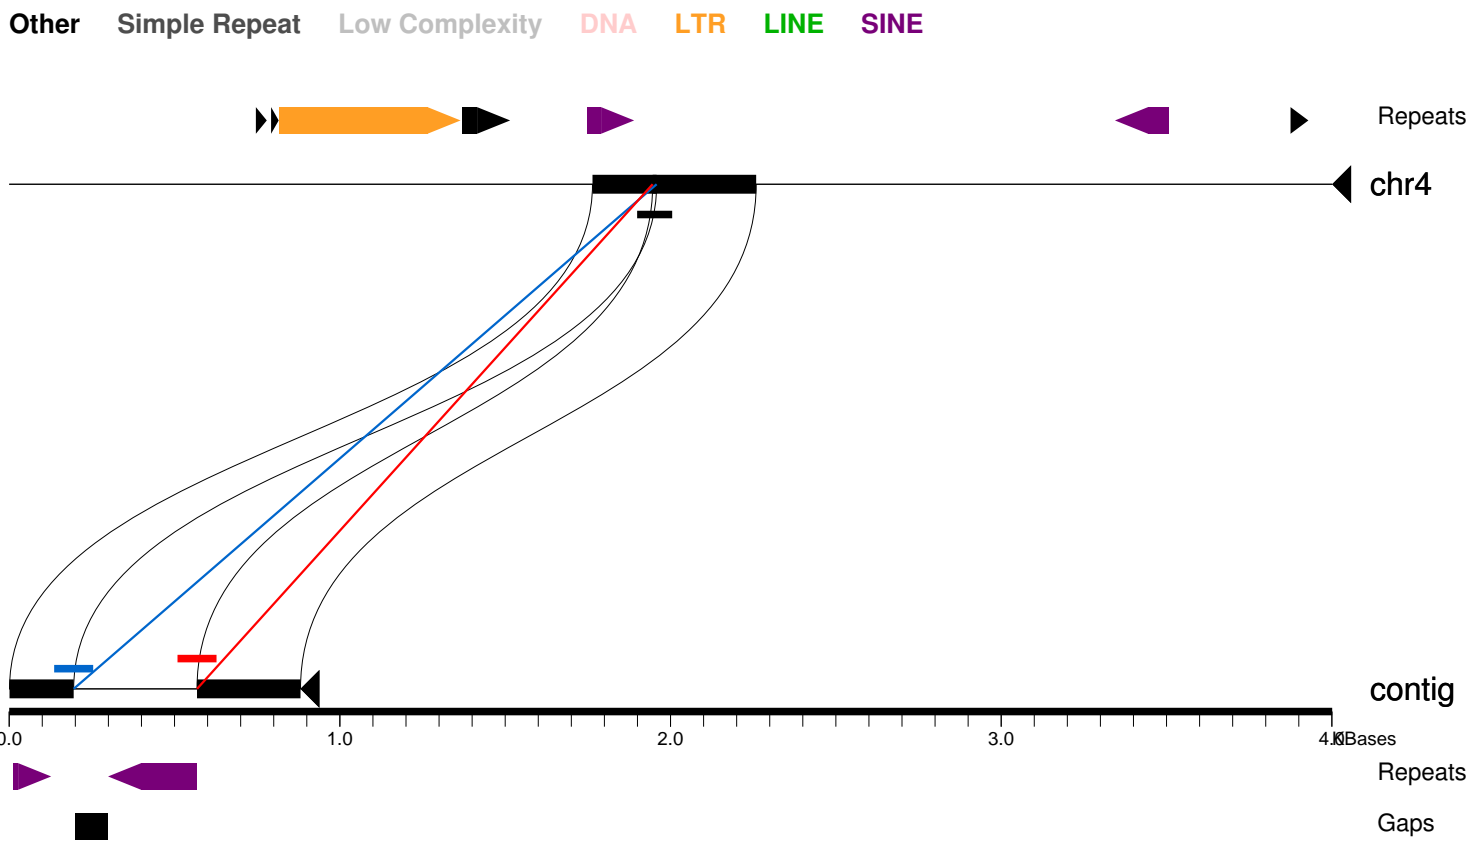

siteID: chr4\_167338790 Scafftig2 - Breakpoint: chr4:167338784

chr4:167338735-167338843

Overlap Length: 11 INS size: 334 Genotyped: Yes

```
left  CTT----TTTCAGTTCTTTAAAAG-----GTATTATTAGGTTGTTT-ACCT-GACATTTTCTACTTTTT
chrom CTT----TTTCAGTTCTTTAAAAG-----GTATTATTAGGTTGTTT-ACCT-GACATTTTCTACTTTTT
right CCGCCCGCCTCGGC-CTCCCAAAGTGCTGGGATTACAGGCGTGAGCCACCGCGCCCGGCTCTACTTTTT
      *111111111*1*11*111***11111*1****111*11*1111***11*1*11111*****
```

  

```
left  CTTTTTTTTTTTTTTTTTTTTTTTTTTTTTTTTTTTTTTTTTTTTTTTTTTTTTTTTTTGAGACG
chrom CAATGCAGGAGTTTATAGCTGTAAACTCTCCTCTTAGTACTGCTTTC-----ACT
right CAATGCAGGAGTTTATAGCTGTAAACTCTCCTCTTAGTACTGCTTTC-----ACT
      *22*2222222***2*222*2*2222*2*22*2**22*22*22***2222222222**2
```

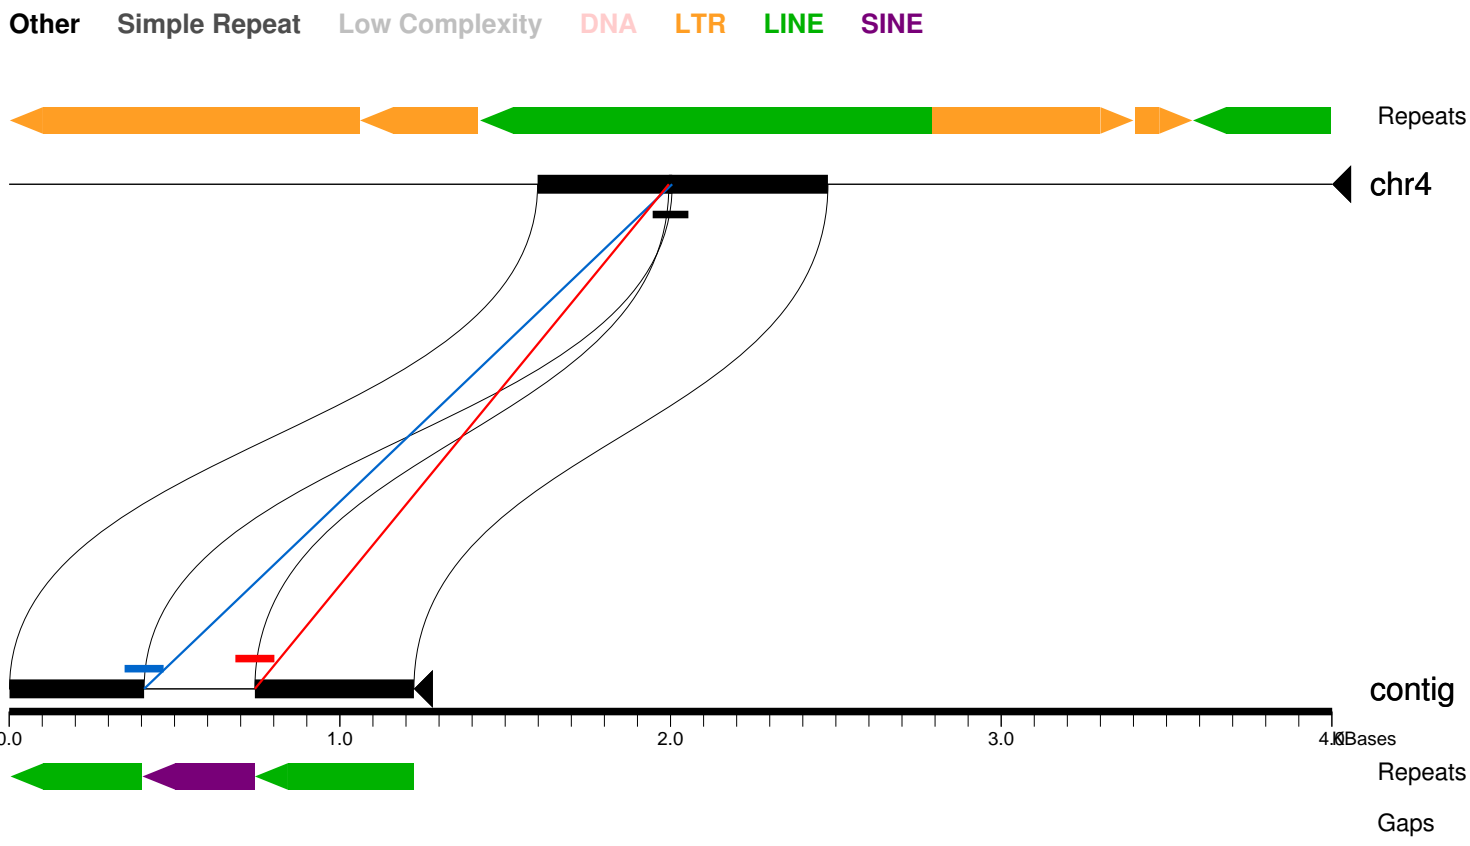





siteID: chr4\_170834594 Scafftig3 - Breakpoint: chr4:170834592

chr4:170834538-170834646

Overlap Length: 6 INS size: 294 Genotyped: Yes

```
left  ATGTTTTGGGAATA-----ATGCTCAGAAATTTTTTAATAATGCACTTTATGATAAAAA-----TTTTCG
chrom ATGTTTTGGGAATA-----ATGCTCAGAAATTTTTTAATAATGCACTTTATGATAAAAA-----TTTTCG
right AGATCCCGCCACTGCACTCCAGCCTGGGCGACAGAGCGAGACTCCGTCTCAAAAAAAAAAAAAAATTTTTCG
      *11*111*11*1*1111111*11**11*11*1111111*1*1*1*111*1*11*1*****1111*****
```

```
left  GCCGGGCGCGGTGGCTCACGCCTGTAATCCCAGCACTTTGGGAGGCCGAG-GCGGGCGGA
chrom --AGGCAACTGGGGTTAA-----AATACAA--AATTTATGAGGGCAAGCGCCATATTC
right --AGGCAACTGGGGTTAA-----AATACAA--AATTTATGAGGGCAAGCGCCATATTC
      222**222*2*2**2*2*2222222***2*2*22*2***22*****2*2**2**2222222
```

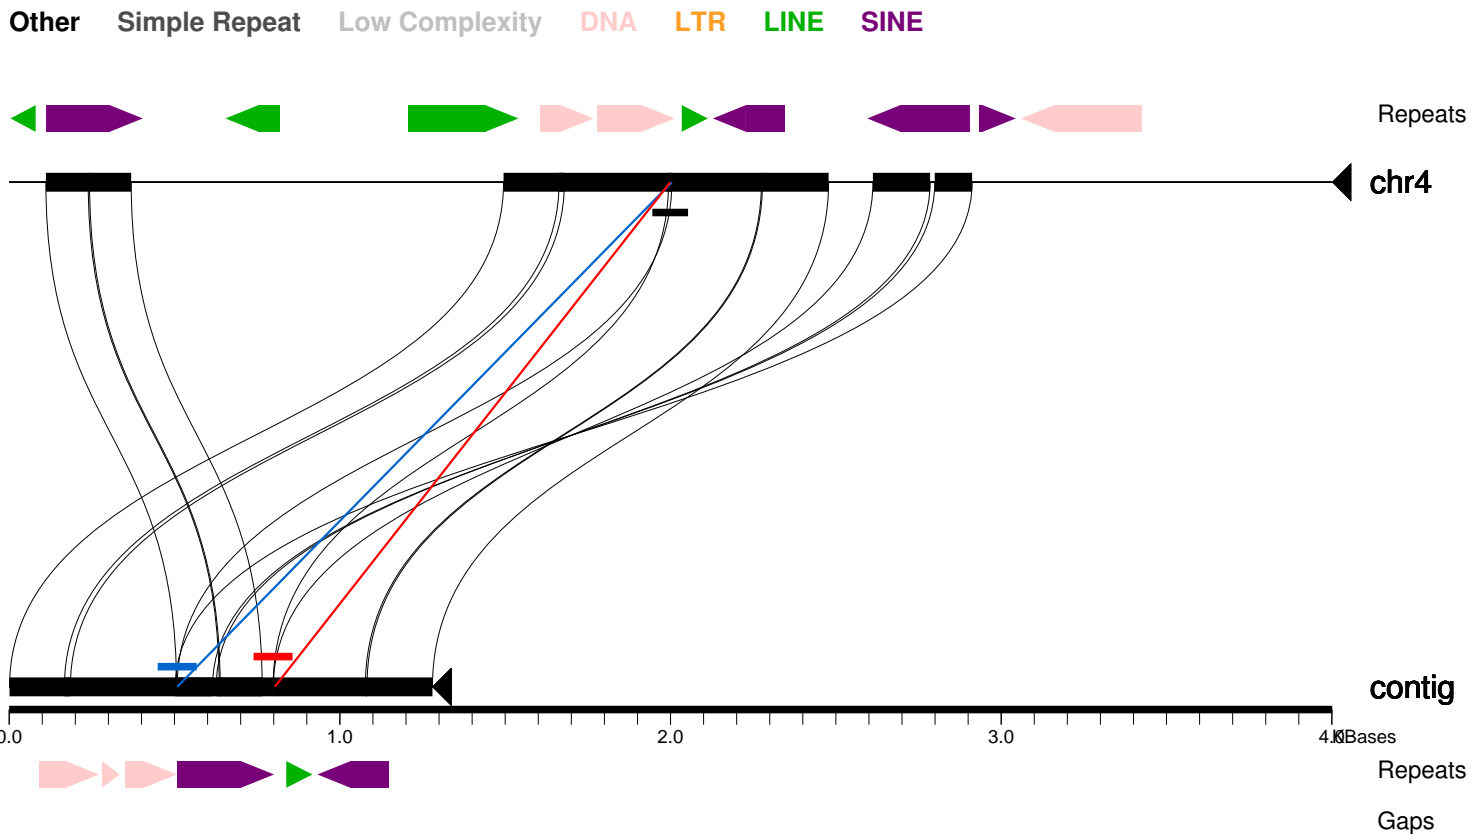

siteID: chr4\_171428775 Scafftig7 - Breakpoint: chr4:171428785

chr4:171428733-171428844

Overlap Length: 8 INS size: 309 Genotyped: Yes

```
left AA-----TGAATTAGG-----GAGTATTCCTTCTTTTTCTATTGATTGGAATAGTTTCAGAAGGAATGGT
chrom AA-----TGAATTAGG-----GAGTATTCCTTCTTTTTCTATTGATTGGAATAGTTTCAGAAAGGAATGGT
right CGCAGTCTGGCCTGGGCGACAGAGCAAGACTCCGTCTCAAAAAAAAAAAAAAAAAAAAAAA---AAACAGGAATGGT
      11111111**111*1**11111***1*111**1*1*1*111*111*1111**1*11111*1*1*****
left  GGCCGGGCGCGGTGGCTCACGCCTGTA-ATCCCAGCACTTTGGGAGGCCAAGGCGGGTGG
chrom ACCAGCTCCTCCTTGTACAT-CTTGTAGAATTTCGGCTAT----GAATCCA--TCTGGTC-
right ACCAGCTCCTCCTTGTACAT-CTTGTAGAATTTCGGCTAT----GAATCCA--TCTGGTC-
      22*2*22*2222*2*22**22*2****2*222*2**22*2222**22***222*2***22
```

Other Simple Repeat Low Complexity DNA LTR LINE SINE

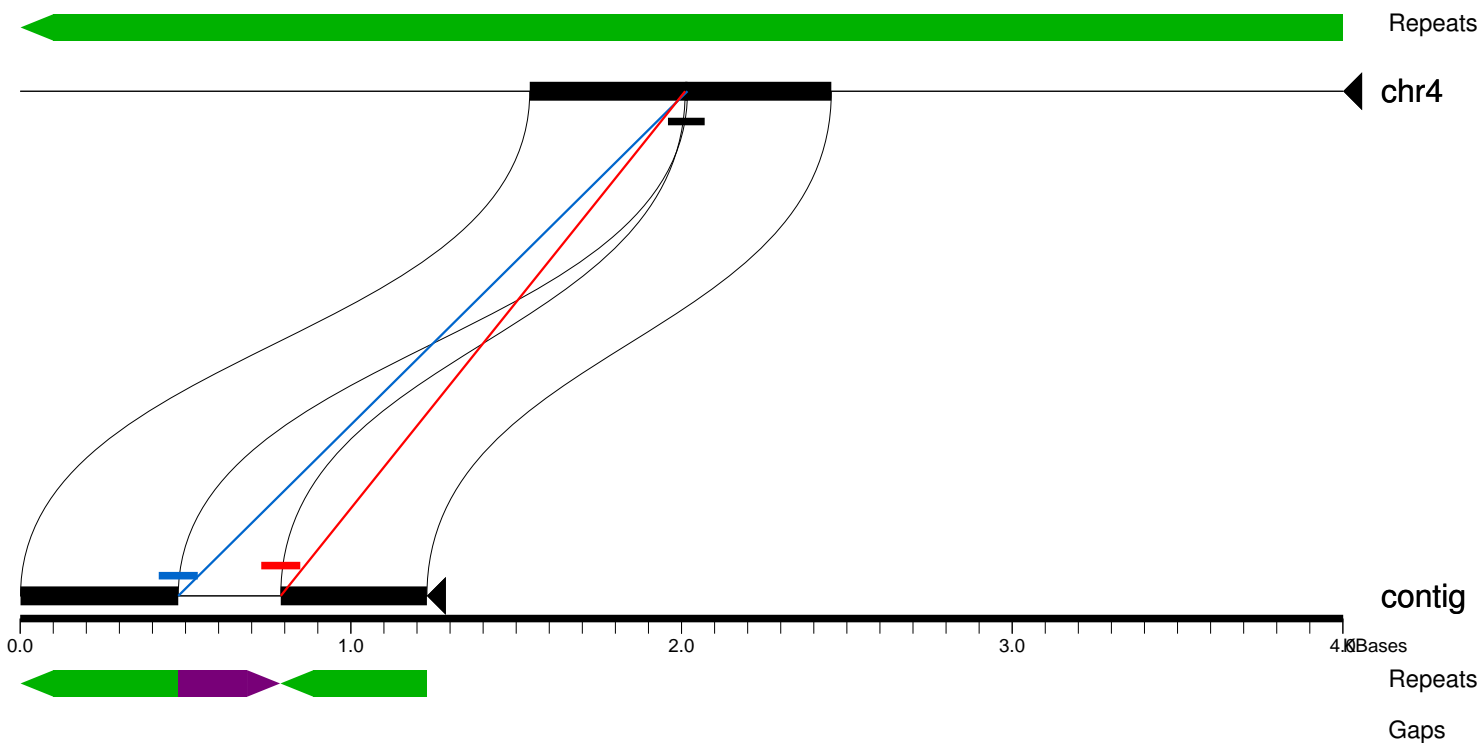

siteID: chr4\_174149435 Scaffoldig2 + Breakpoint: chr4:174149441  
chr4:174149408-174149500  
Overlap Length: 27 INS size: 423 Genotyped: No

```

left  -----CATCACCAGAGAAAAGCTGCTT---TTACT-----CTCTCTTCTTCTAGTCAT
chrom -----CATCACCAGAGAAAAGCTGCTT---TTACT-----CTCTCTTCTTCTAGTCAT
right  CCGCCCGCCTCGGCCTCCCAAAGTGTGCTGGGATTACAGGCGTGAGCCACCGCGCCCGGCCCTTCTAGTCAT
      11111111*1**11*11111***1****1111****11111111111111111111*1*1111*****

```

```

left  TTCTATGCCCCATTATNNNNNNNNNNNNNNNNNNNNNNNNNNNNNNNNNNNNNNNNNNNNNNNNNNNNNNNN
chrom TTCTATGCCCCATTATTTATTTTTGCATATTTGAGGTGATGTGGTGTAAA-----
right TTCTATGCCCCATTATTTATTTTTGCATATTTGAGGTGATGTGGTGTAAA-----
      *****2222222222222222222222222222222222222222222222222222222222222222

```

```

left  NNNNNN
chrom -----
right -----
      22222

```

Other   Simple Repeat   Low Complexity   DNA   LTR   LINE   SINE

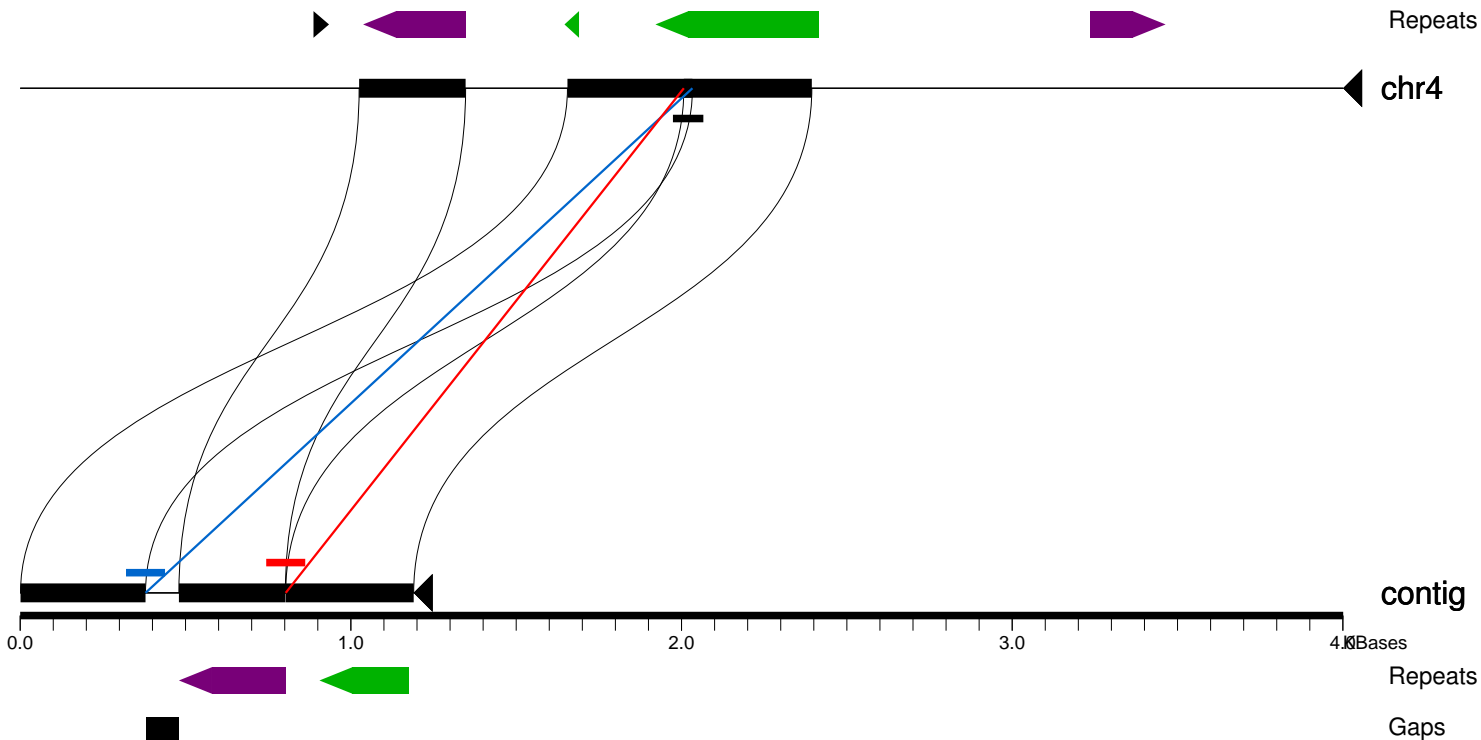

siteID: chr4\_174786703 Scaffoldig2 + Breakpoint: chr4:174786705  
 chr4:174786649-174786764  
 Overlap Length: 4 INS size: 412 Genotyped: No

```

left  GTGTACCTTAAATCCATTGGAAAAGCTAGAATAAGCTTTCATCTTAAGAAAGTTCTT---TCTGGGCCGGG
chrom GTGTACCTTAAATCCATTGGAAAAGCTAGAATAAGCTTTCATCTTAAGAAAGTTCTT---TCTGAAGATAA
right NNNNNNNNNNNNNNNNNNNNNNNNNNNNNNNNNNNNNNNNNNNNNNNNNNNNNNNNNNNNNNNNNNNNNNN
      111111111111111111111111111111111111111111111111111111111111111111111111
      * * * * * 22222222

left  CGCGGTGGCTCACGCCGTGTAATCCCAGCACTTTGGGAGGCCGAGGCGGGCGG
chrom TG-GGAGGCTTCTGTTTATGGACC-AACAATTTGAG-GAATGTAGTGATCAC
right TG-GGAGGCTTCTGTTTATGGACC-AACAATTTGAG-GAATGTAGTGATCAC
      2*2**2****222*22*2*222**2*2**2****2*2*222*22*2*22*22
  
```

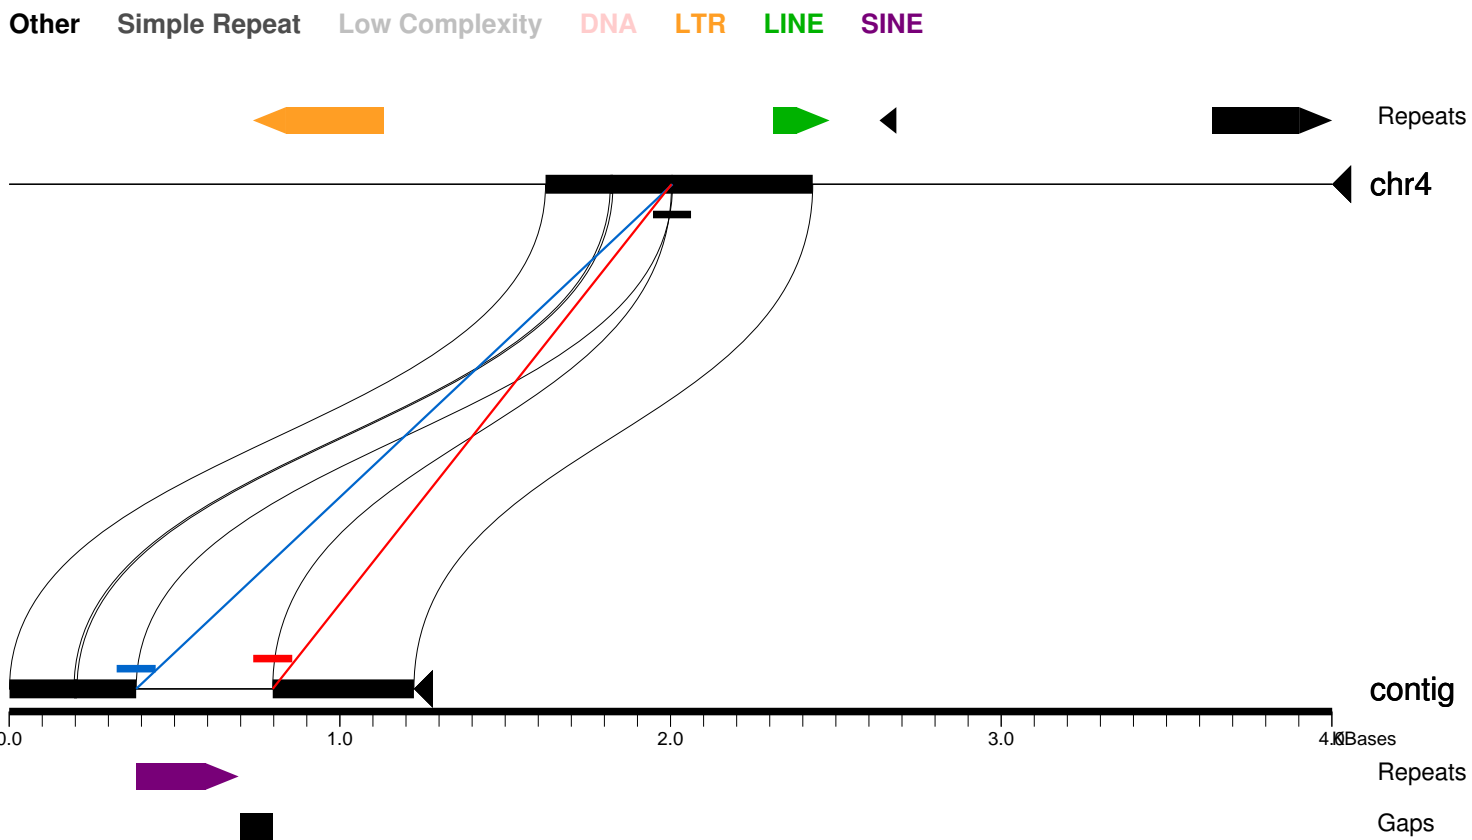

siteID: chr4\_175534313 Scafftig21 + Breakpoint: chr4:175534292

chr4:175534246-175534351

Overlap Length: 14 INS size: 313 Genotyped: Yes

```
left  ATCTCACATGG---TGGCAGACAGCAG--AAGAGAAT-GAGAGCCAA-----GAGAAAGGAGTTTCCC
chrom ATCTCACATGG---TGGCAGACAGCAG--AAGAGAAT-GAGAGCCAA-----GAGAAAGGAGTTTCCC
right CGCCCGCCTCGGCCTCCCAAAGTGCTGGGATTACAGGCGTGAGCCACCGCGCCCGGCCTAGGAGTTTCCC
      11*1*1*1*1*111*11**1*11**1*11*11*1*111*1*****11111111*1111*****
```

  

```
left  CTTTTTTTTTTTTTTTTTTTTTTTTTTTTTTTGGAGACGGAGTCTCGCTCTGTCGCCCAGGCTGGA
chrom CTTATAAAAACCATCAGATCTTGT-----GAGACTTATTC-----AATACCATGAGAACA
right CTTATAAAAACCATCAGATCTTGT-----GAGACTTATTC-----AATACCATGAGAACA
      **2*2222222*2222*2**2*222222*****22*2**222222222222**22*22222*
```

Other Simple Repeat Low Complexity DNA LTR LINE SINE

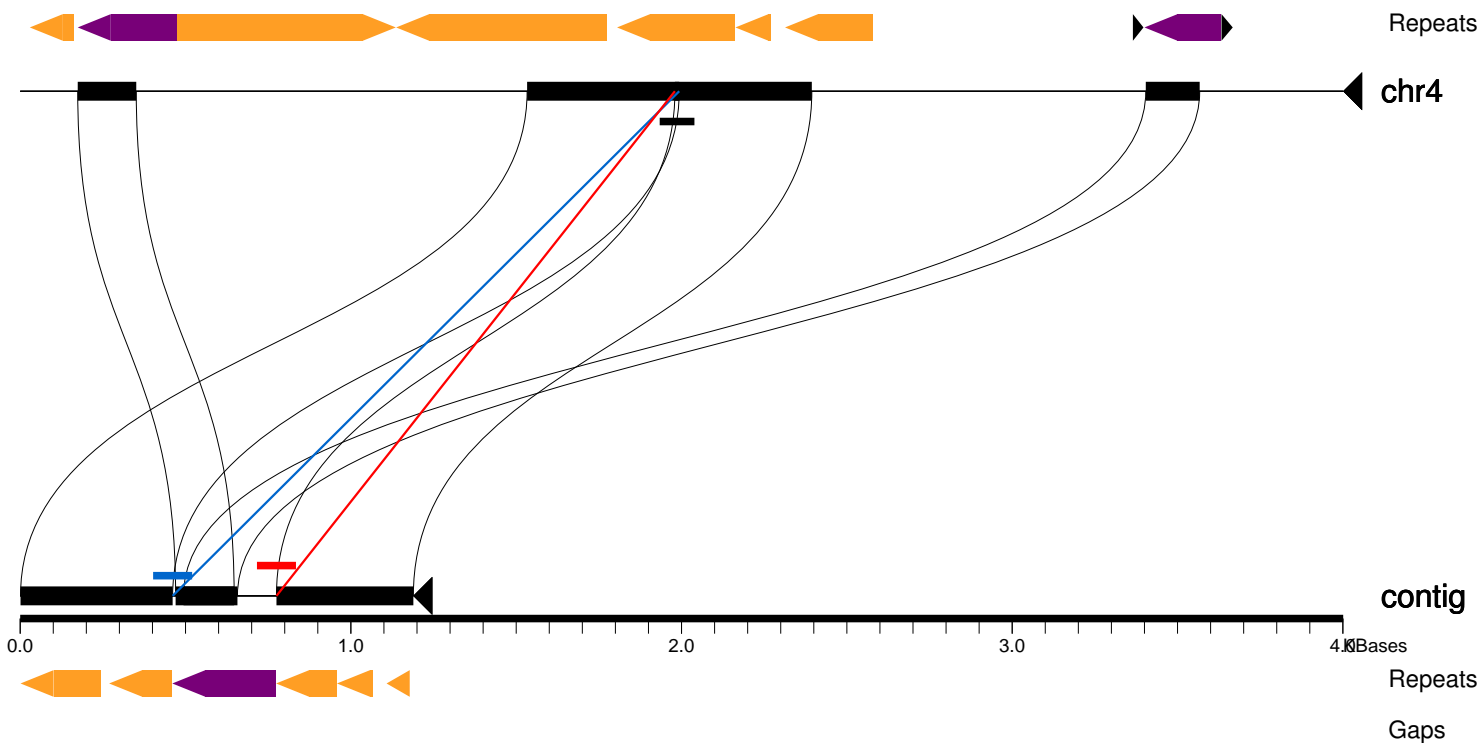

siteID: chr4\_176281833 Scafftig4 - Breakpoint: chr4:176281823

chr4:176281777-176281882

Overlap Length: 14 INS size: 231 Genotyped: Yes

```
left  TACAATAAGAATTTGGGACTTTTTCTTTACAATCATAGGAAGGCAT-----AAAAGGCTTTA
chrom TACAATAAGAATTTGGGACTTTTTCTTTACAATCATAGGAAGGCAT-----AAAAGGCTTTA
right CTGGGCGACAGAGCGAGACTCCGTCTCAAAAAAAAAAAAAAAAAAAAAAAAAAAAAAAAAAAA*AAAAGGCTTTA
      11111111*1*11111*1****111**11*1**11*1*11**111*1111111111111111******
left  GGCCCATCCTGGCTAACACG-GTGAAACCCCGTCTCTACTAAAAATACAAAAAATTAGCCGGG
chrom GGCC--ATAATTGATATGACTAGTTATAT---GT-TGTAGAACAATAACAAAAAAA-----
right GGC--ATAATTGATATGACTAGTTATAT---GT-TGTAGAACAATAACAAAAAAA-----
      **22**22*2*2**22**22**2*2*2222**2*2**22*2**22*****222222222
```

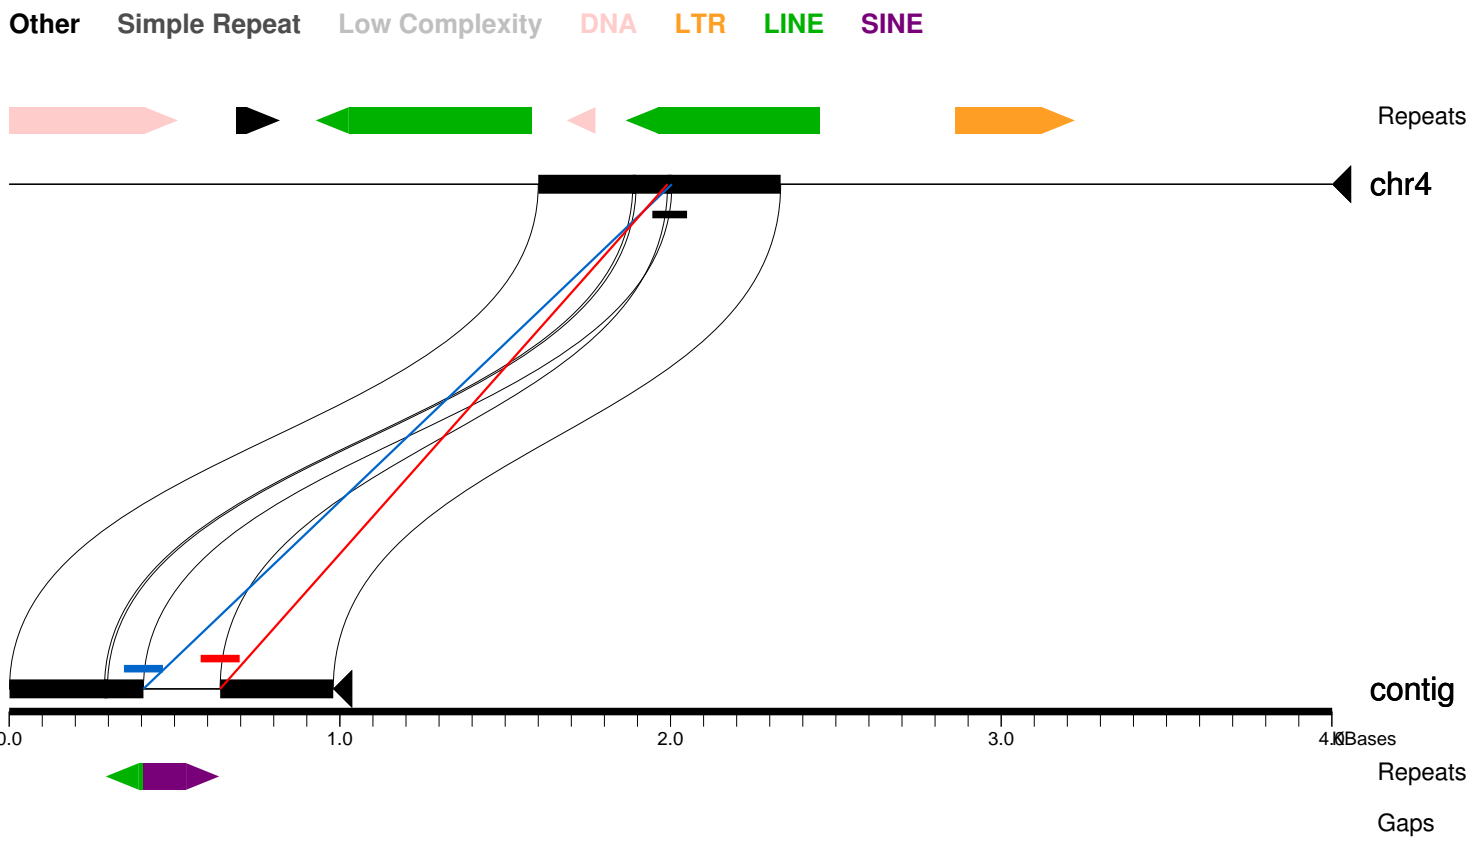

siteID: chr4\_178789725 Scaffoldig2 - Breakpoint: chr4:178789746

chr4:178789693-178789793

Overlap Length: 7 INS size: 297 Genotyped: Yes

```
left  -----CTAAGTCAAAGCTCTGAGA---AGGGAAAACACCTATGACTACAAAAAAGTTTAAA-----
chrom -----CTAAGTCAAAGCTCTGAGA---AGGGAGAATACCTATGACTACGAAAAAAGTTTAAA-----
right  TGCAGTCCGCAGTCCGGCCTGGGCGACAGAGCGAGACTCCGTCTCAAAAAAAAAAAAAAAAAAAAAAAAAAAAA
11111111*11****1111**11*1**111**1**2*121*1*1*1*11*1N*****1111***11111111

left  -GTTTAGTCACGCCGTGTAATCCCAGCACTTTGGGAGGCCGAGGCGGGTGGATCATGAGGTCAGGAGA
chrom -GTTTAGTTAT---TGTTATG-----GGCTGAATTGTGTCCCCCCCCAAAATTCACAT-
right  AGTTTAGTTAT---TGTTATG-----GGCTGAATTGTGTCCCCCCCCAAAATTCACAT-
1*****2*2222***2**2222222222222222***2**222*2**2222*222*22*2222*22
```

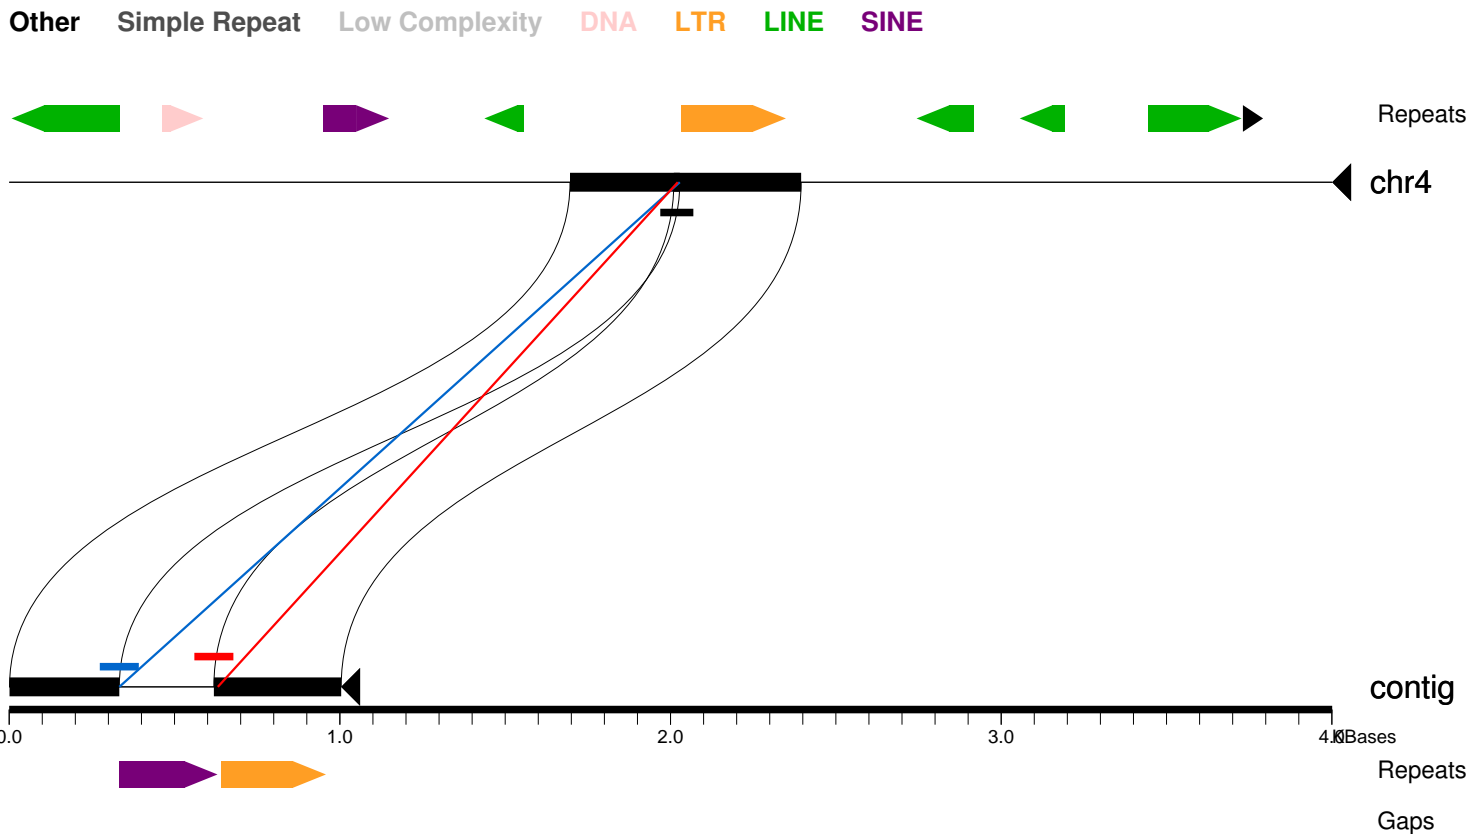

siteID: chr4\_179198329 Scafftig1 + Breakpoint: chr4:179198313

chr4:179198153-179198489

Overlap Length: 17 INS size: 304 Genotyped: Yes

```
left -----CCCAGAATGTTTAAATTTAAAATGACTTCGCATTTTTCTCATTTAAAGACACACAT
chrom TGTTTTTTTTTTCTCCCAGAATGTTTAAATTTAAAATGACTTCGCATTTTTCTCATTTAAAGACACACAT
right T-----TTAGTAGAGACGGAGTT-----TCACCATTTTAG--CCGGGAT
2 111111111111***1*11*1*11*1*11*1*1111111111***11*****1*111*1111**
```

```
left GGACACTTATTTTTTGTAAAACCTCACCAACACCCTTAAGAAAATTTCAAAACCCTAC-TTTCTACTTCTGC
chrom GGACACTTATTTTTTGTAAAACCTCACCAACACCCTTAAGAAAATTTCAAAACCCTAC-ATTCTACTTCTGC
right GGTCTCA-ATCTCCTGACCTCGTGATCCGCCCGCCTCGGCC-TCCCAAAGTGCTGGGATTACAGGCGTGA
**1*1*11**1*11**11111111*1*1*11*1*1*1*11*111*11***111**1112**11*1111**1
```

```
left GCTATCTGAATGCGTGTGTC-ATGGTCATCCCTTCTTTTTTTTTTTTTTTTTTTTTTTTTTGGAGACGGAG
chrom GCTATCTGAATGCGTGTGTC-ATGGTCATCCCTTCTTTAAAAATGATTTTTTACATGCCTCTCACCTCT
right GCCACC-----GCGCCCCGCCCATGGTCATCCCTTCTTTAAAAATGATTTTTTACATGCCTCTCACCTCT
**1*1*111111***1N11*1*1*****22222*22*****222*222*222**2222
```

```
left TCTCGCTCT--GTC-----GCCAGGCTGGAGTGCAGTGGCGG-----GATCTCGGCTCACT
chrom TTGTGCTATCAGCCCTTCAGGGCACAAAGTTGTTTTTCATTATCCTTTACCTGCACAGAGCCTAGAATACA
right TTGTGCTATCAGCCCTTCAGGGCACAAAGTTGTTTTTCATTATCCTTTACCTGCACAGAGCCTAGAATACA
*222***2*22*2*2222222**2**2*2**222*2**2*22*222222222222**2*222*222**2
```

```
left GCAAGCTCCGCCTCCCG--GTTACGCCAT---TCTCC-----TGC
chrom GAAAGTGCTTAATTTTTTATTTGTTGATGTAATGAGTGTGTGTGGTGTAGGGGTGTGT
right GAAAGTGCTTAATTTTTTATTTGTTGATGTAATGAGTGTGTG-----
*2**22*2222*22222222**2*2*22**222*2*222 11N
```

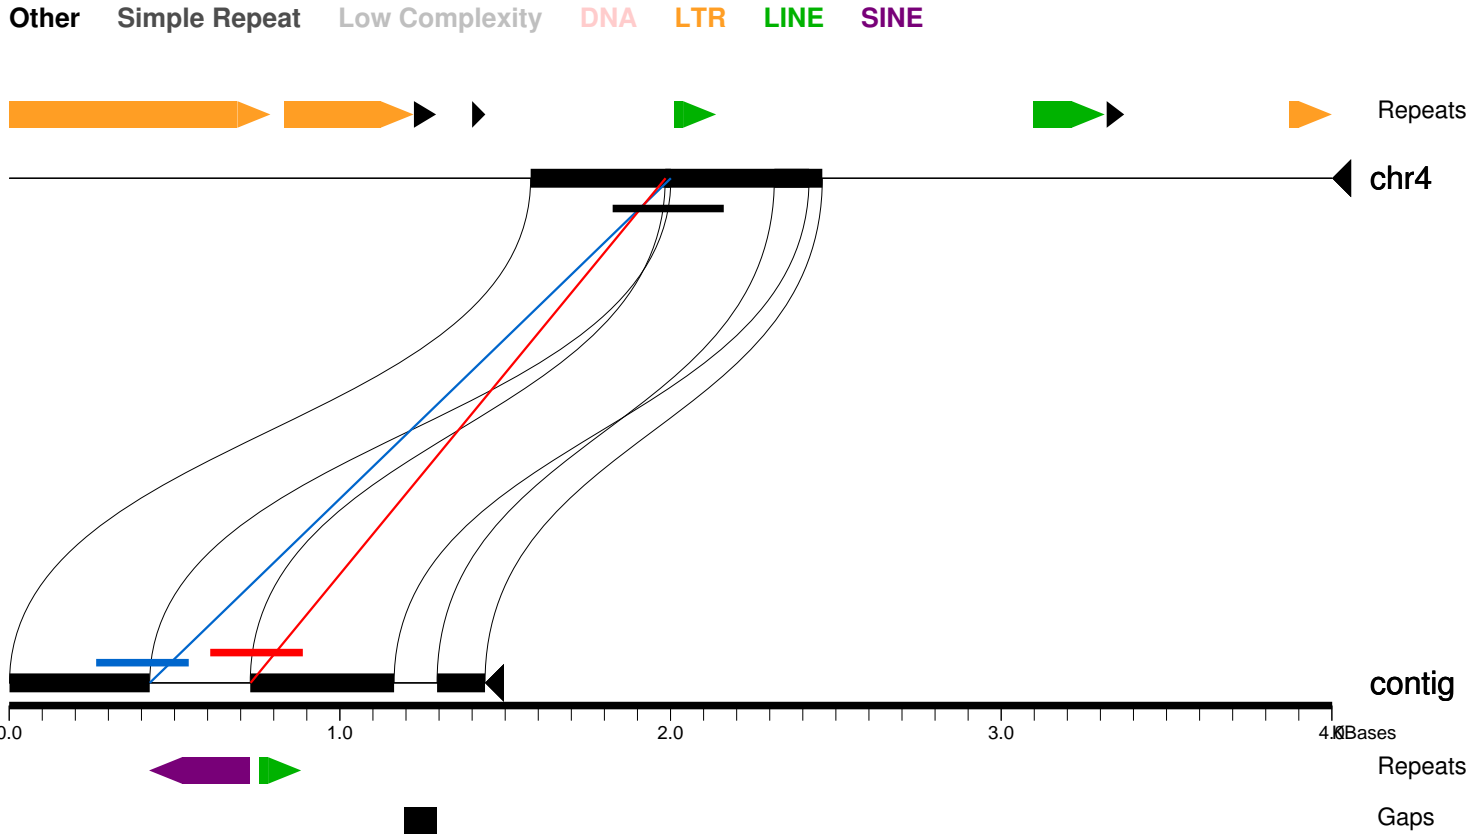



siteID: chr4\_179444737 Scafftig2 + Breakpoint: chr4:179444720

chr4:179444679-179444779

Overlap Length: 16 INS size: 300 Genotyped: Yes

```
left  -----GAAAAACCATT---TATTGCT-----TA-AAACAC-ACCCATC-CAAAATATCTGATTCTCAA
chrom -----GAAAAACCATT---TATTGCT-----TA-AAGCAC-ACCCATC-CAAAATATCTGATTCTCAA
right TCCGCCCGCCTCAGCCTCCCAAAGTGCTGGGATTACAAGCGTGAGCCACCGCGCCCGGCCTGATTCTCAA
      11111111*11111*1*1*111111*1****111111**1**2*111*1***1*1*11111111*****
```

```
left  TTTT TTTTTTTTTTTTTTTTTTTTTTTTGGAGACGGAGTCTCGCTCTGTGGCCAGTGGGAGTGCAGTGGC
chrom TTTT TATTGGCTTTGAGCTATTTTA---AC--AGT-----TCTGTA----AATTGTAACTAAG----
right TTTT TATTGGCTTTGAGCTATTTTA---AC--AGT-----TCTGTA----AAATGTAACTAAG----
      *****2**222***2222*2****2222**22***22222*****22222*212*2*2222**2222
```

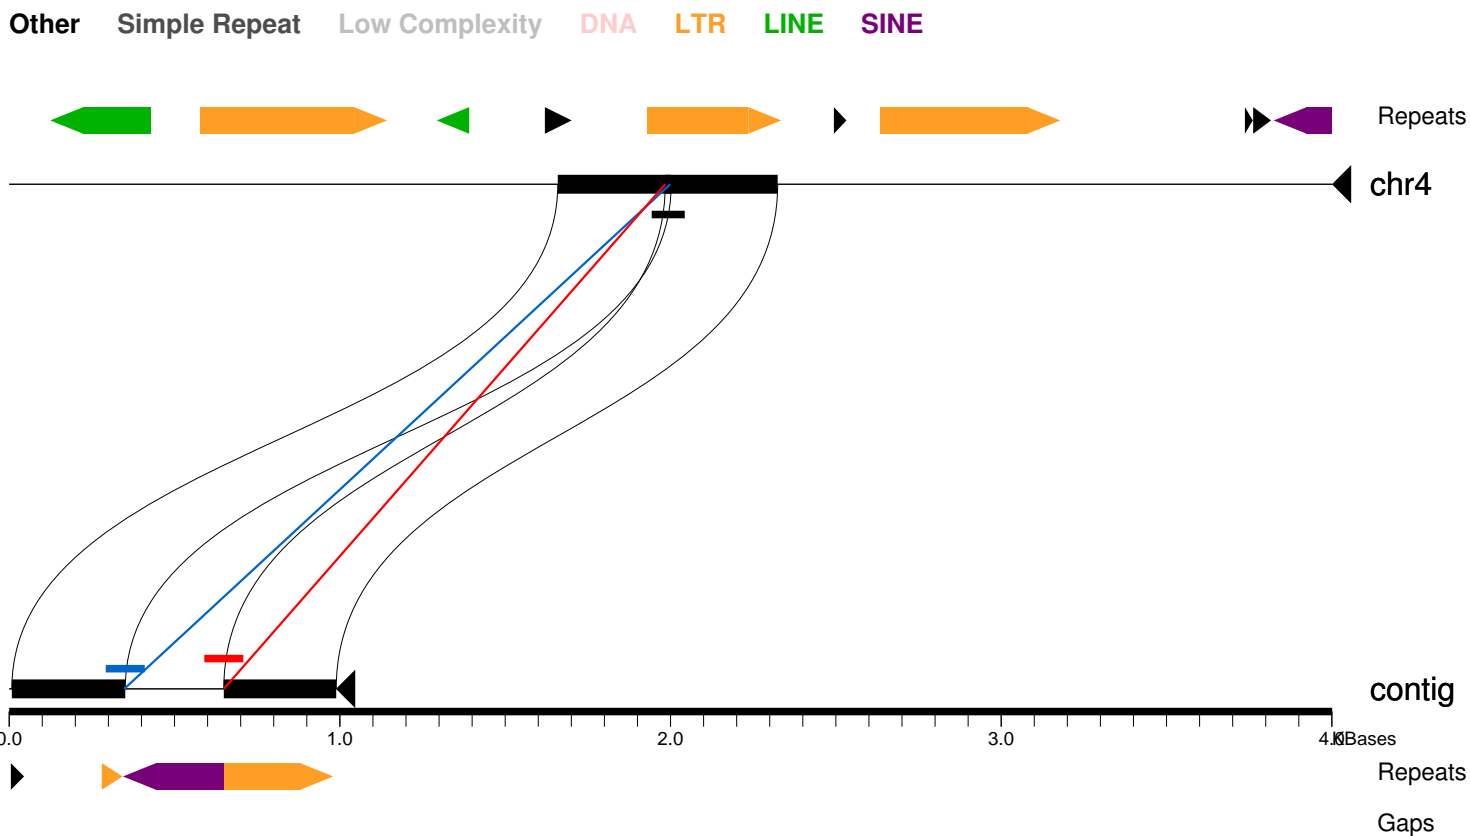

siteID: chr4\_180256973 Scafftig3 + Breakpoint: chr4:180256956

chr4:180256796-180257129

Overlap Length: 14 INS size: 302 Genotyped: Yes

```
left      T-----AG-CATGCTGACATCTGGTACATACAGCTCATGTGTCTA-ATCCTCTTTCTATAAAATTATT
chrom     TTTGAGAAATAG-CATGCTGACATCTGGTACATACAGCTCATGTGTCTA-ATCCTCTTTCTATAAAATTATT
right     TTT-AGTAGAGACGGGGTTTCACCGTGT-AGCCAGG--ATG-GTCTCGATCTCCTGAC-----
*22 22N2N**1*11*1*11**1*11**11*11**111**1***1***11**11*11111111111
```

```
left      ACTTGTATTTGTTTCTTGATAA-CAGTTTTAACAAGT-CTGTGATTAATATTGGTCAGCTAGTTCCATTG
chrom     ACTTGTATTTGTTTCTTGAGAA-CAGTTTTAACAAGT-CTGTGATTAATATTGGTCAGCTAGTTCCATTG
right     -CTCGT----GATCCGCCCGCCTCGGCCTCCCAAAGTGCTGGGATTACAA-----GCGTGAGCCACCG
1**1**1111*1*1*11112111*1*11*1111****1***1*****11*1111111*11*11***11*
```

```
left      ACCTCTTCTGCCTTTTACTCCATTAAATCAAATTTCTTTTTTTTTTTTTTTTTTTTGGAGACGGAGTCTC
chrom     ACCTCTTCTGCCTTTTACTCCATTAAATCAAATTTCTTATTGCCTAAATGTCTCC---AGAATGTGTCCA
right     CGCCCA---GCCT-----AAATCAAATTTCTTATTGCCTAAATGTCTCC---AGAATGTGTCCA
11*1*1111****11111111111******2**222*222*2*2*22222***22*2***22
```

```
left      GCTCTGTGGCC--CAGGTGGGAGTGCAGTGGC-GCAATCTA----GGCT-----CACTGC----AA
chrom     GGTATATGCGTTGCATGTTAGAGTCTATTTATTGCATTCAAAAAGTGGCCTGGTGTTCCAATGCTGTCAA
right     GGTATATGCGTTGCATGTTAGAGTCTATTTATTGCATTCAAAAAGTGGCCTGGTGTTCCAATGCTGTCAA
*2*2*2**22222**2**22***22*2*2222***2**2*2222***2222222222**2***2222**
```

```
left      GCTCCGCC-----TCCCGGGTTCACGCCAT-----TCTCC-----TGC
chrom     GTAGTGCCAGAAAAATATTTTGGAGAGTTTACCCTGTAGTGGGAATCTTTATGTGGATTTTG
right     GTAGTGCCAGAAAAATATTTTGGAGAGTTTACCCTGTAGTGGGAATC-----
*2222***2222222222*222*2***2**2*22*22222222*1NN                      1NN
```

Other Simple Repeat Low Complexity DNA LTR LINE SINE

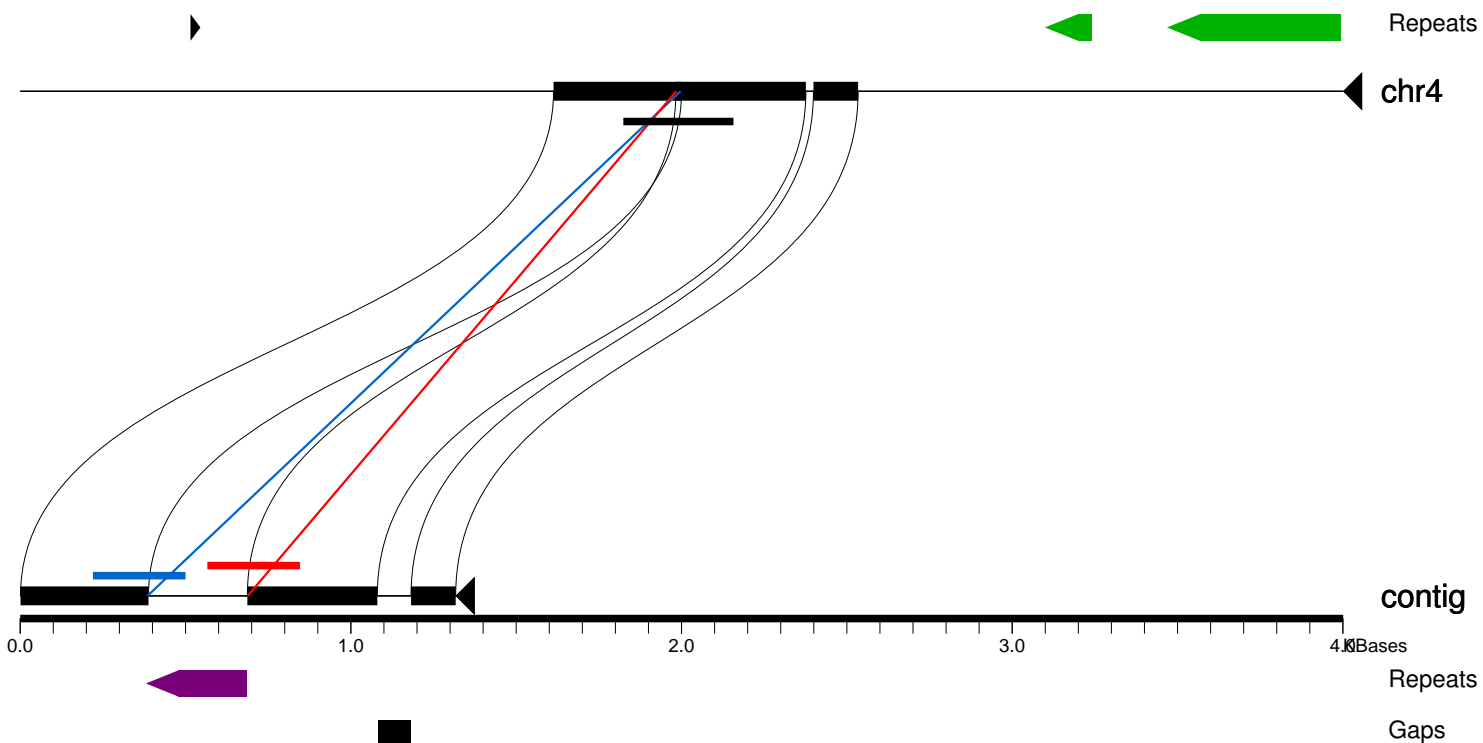

siteID: chr4\_181503031 Scafftig1 - Breakpoint: chr4:181503027

chr4:181502971-181503086

Overlap Length: 4 INS size: 440 Genotyped: No

```
left  ATTGCTTTATTGTATTATTTATATTACAAATATATTGGTTTACTGTTTATTAGCAA-----AA
chrom ATTGCTTTATTGTATTATTTATATTACAAATATATTGGTTTACTGTTTATTAGCAA-----AA
right CCGCCCGCCTCGGCCTCC-----CAAAGTGCTGGGATTACAGGCG-TGAGCCACCGCGCCCGGCCAA
      1111*1111*1*111*1111111111****1111*1**1****1*1111*1***1*111111111111**
```

```
left  TGNNNNNNNNNNNNNNNNNNNNNNNNNNNNNNNNNNNNNNNNNNNNNNNNNNNNNNNNNNNNNNNNNNN
chrom TGCTTATTTTTACTACTCTAATGAGAATAATTATTTTTGTTCTAAAGACAATAATATG---
right TGCTTATTTTTACTACTCTAATGAGAATAATTATTTTTGTTCTAAAGACAATAATATG---
      **22222222222222222222222222222222222222222222222222222222222222222222
```

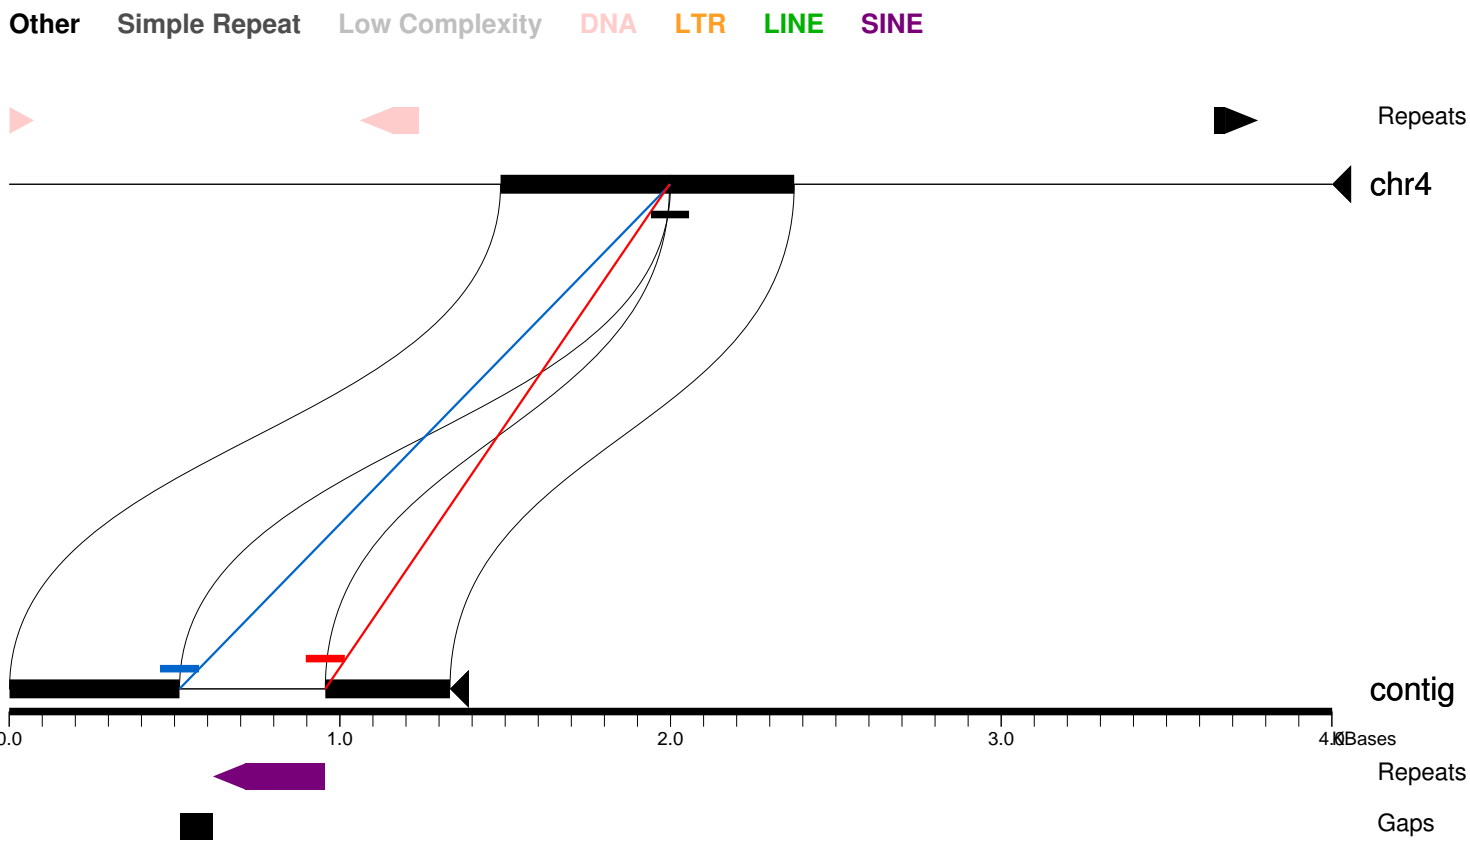

siteID: chr4\_18472666 Scaffitg1 + Breakpoint: chr4:18472631

chr4:18472589-18472690

Overlap Length: 18 INS size: 399 Genotyped: No

```
left  GACA-----AAATTTAGTGGAG-ATAGGTGACTAGCAGAAGATATTTGCAACATCTATA
chrom GACA-----AAATTTAGTGGAG-ATAGGTGACTAGCAGAAGATATTTGCAATGCTATA
right TCCACCCGCTCGGCCTCCCAAAGTGTGGGATTACAGGCGTGAGCCACCGCGCCCGGCCAACATCTATA
      11**11111111111111111111**1*11111**11*1***1*11111**111111111111***NN*****

left  AATTTTNNNNNNNNNNNNNNNNNNNNNNNNNNNNNNNNNNNNNNNNNNNNNNNNNNNNNNNN
chrom AATTTT-----AAAGGCATCAATATTTAGTGTATAACATGAATTGCCTGGAAAT
right AATTTT-----AAAGGCATCAATATTTAGTGTATAACATGAATTGCCTGGAAAT
      **2***22222222222222222222222222222222222222222222222222222222222222
```

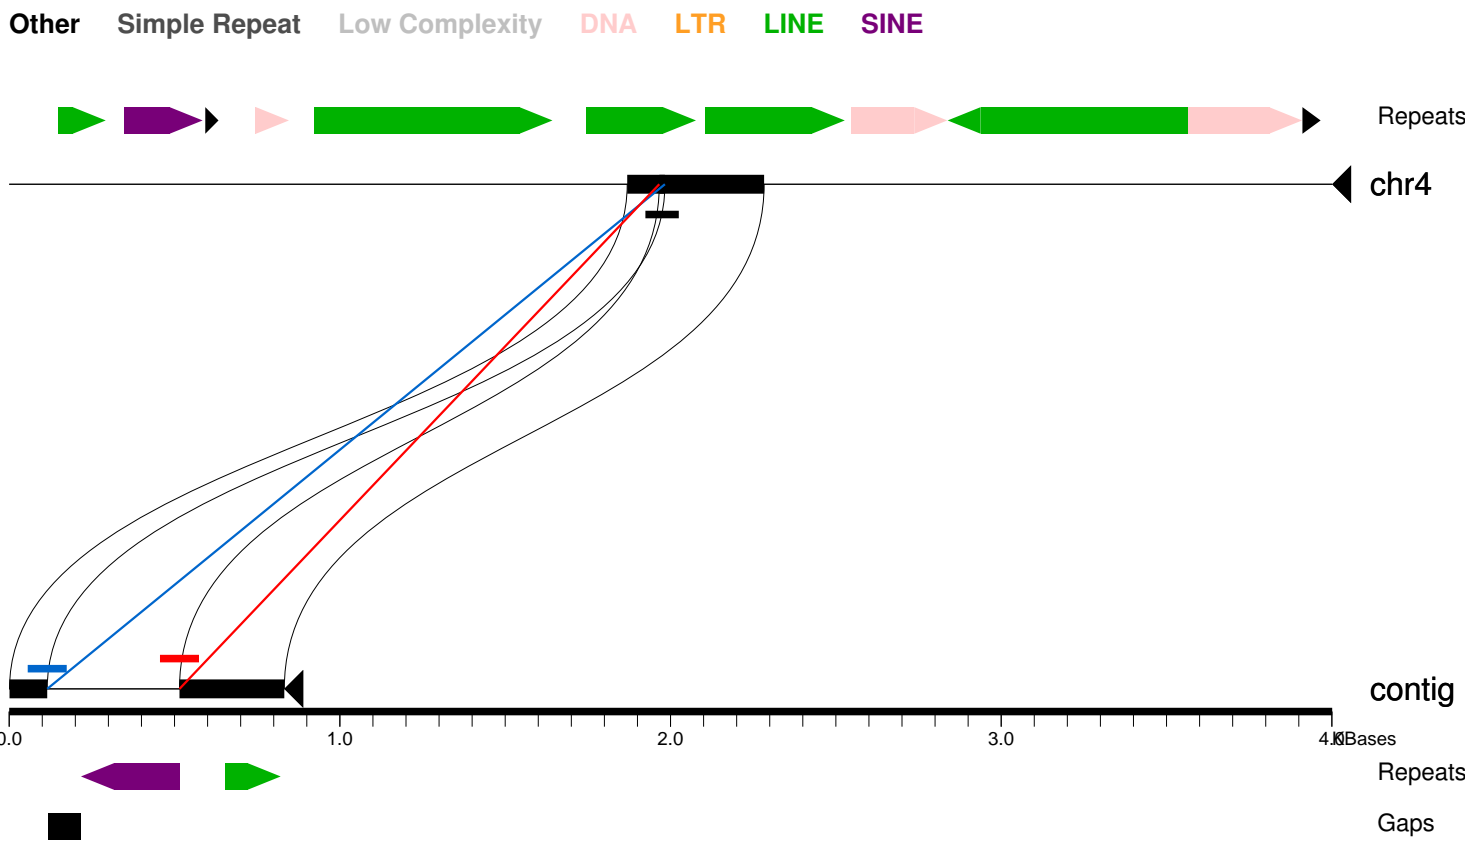



siteID: chr4\_185977806 Scafftig10 + Breakpoint: chr4:185977802

chr4:185977750-185977860

Overlap Length: 8 INS size: 300 Genotyped: Yes

```
left  GTTCTGAGCTTGAAATGTCAAAAT-----AATCAAAA---ATAAACATAGCTCACGTAC-TGAATTTT
chrom GTTCTGAGCTTGAAATGTCAAAAT-----AATCAAAA---ATAAACATAGCTCACGTAC-TGAATTTTA
right CCGCCCGC-CTCGGCCTCCCAAAGTGCTGGGATTACAGGCGTGAGCCACCGCGCCCGGCCCTGAATTTTA
      1111*1*11*1*111*11****1*111111**1*1*111111*11**11**1*1**11*1*1*****2
```

```
left  TTTTTTTTTT--TTTTTTTGGAGACGGAGTCTCGCTCTGTCTCGCCAGGCTGGAGTGCAGTG
chrom TCATTAAAATACTTTGTTTTCCATTGAGTGTTG-----GGACATCTTTTTGTTGA---
right TCATTAAAATACTTTGTTTTCCATTGAGTGTTG-----GGACATCTTTTTGTTGA---
      *22**2222*22***2***222*22****2*2*2222222*22**222*222**22*222
```

Other Simple Repeat Low Complexity DNA LTR LINE SINE

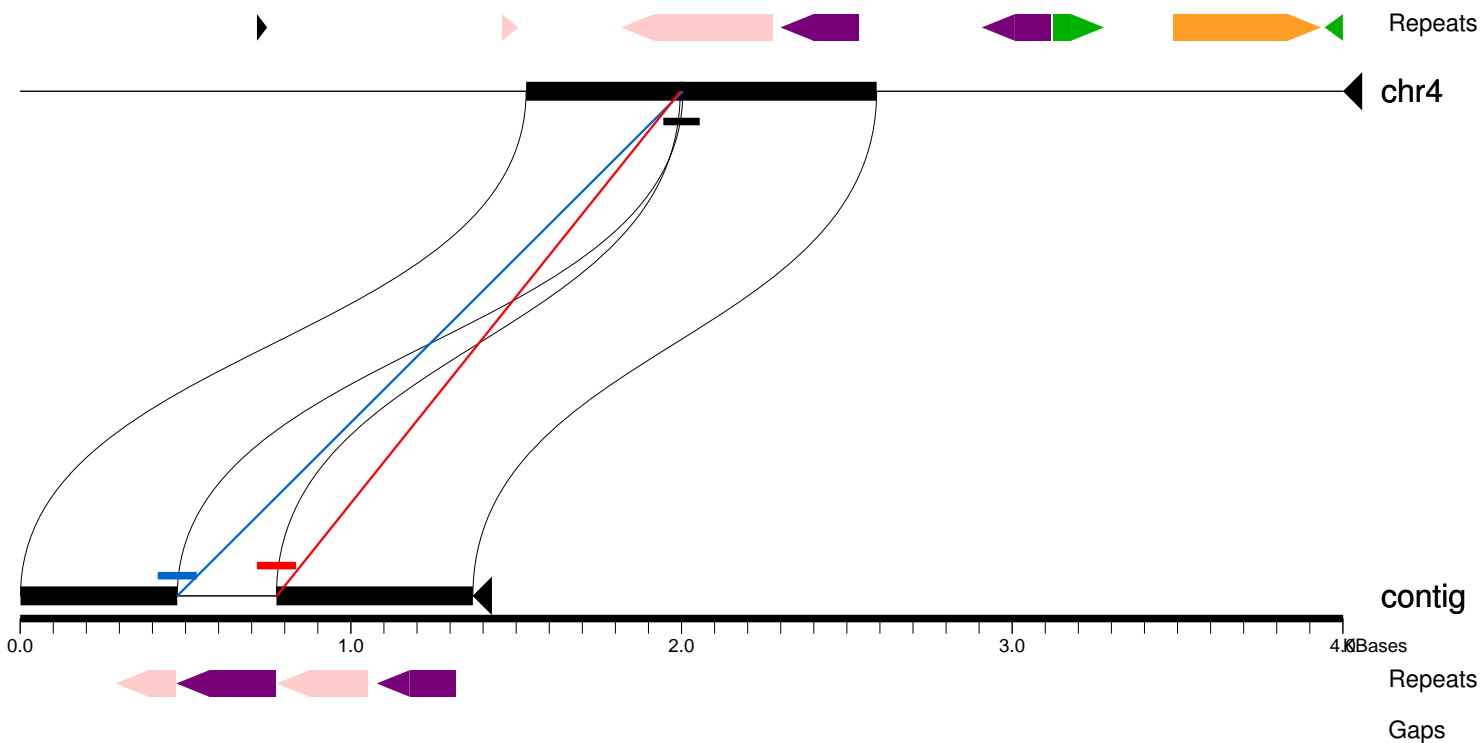

siteID: chr4\_186382148 Scafftig8 + Breakpoint: chr4:186382147

chr4:186382101-186382206

Overlap Length: 14 INS size: 273 Genotyped: Yes

```
left  ATT----TTTCCTGTAACAAAGAG-----GACCATGTAAAGTGAAATGAACTGATGGTAGTCAC
chrom ATT----TTTCCTGTAACAAAGAG-----GACCATGTAAAGTGAAATGAACTGATGGTAGTCAC
right GTCTCGATCTCCTGACCTCGTGATCCGCCCCGCTCGGCCTCCCAAAGTGCTGGGA--TTACGGTAGTCAC
      1*111111*1*****11111111*1111111111111*1**1111*****1111**11*1*1*****
```

```
left  GTTTTFTTTTTTTTTTTTTTTTTTGGAGACGGAGTCTCACTCTTTTCGCCCAAGCTGGACTGCAGTGGC
chrom GTTTTGAAGTACCTACATATAGAAATG-ATT-----TCTGTAGAATAACAT--ACCAA-----
right GTTTTGAAGTACCTACATATAGAAATG-ATT-----TCTGTAGAATAACAT--ACCAAG-----
      ****2222*222*222*2*2**2*2*2*2*22222***2*2*222**22*22**222122222
```

Other Simple Repeat Low Complexity DNA LTR LINE SINE

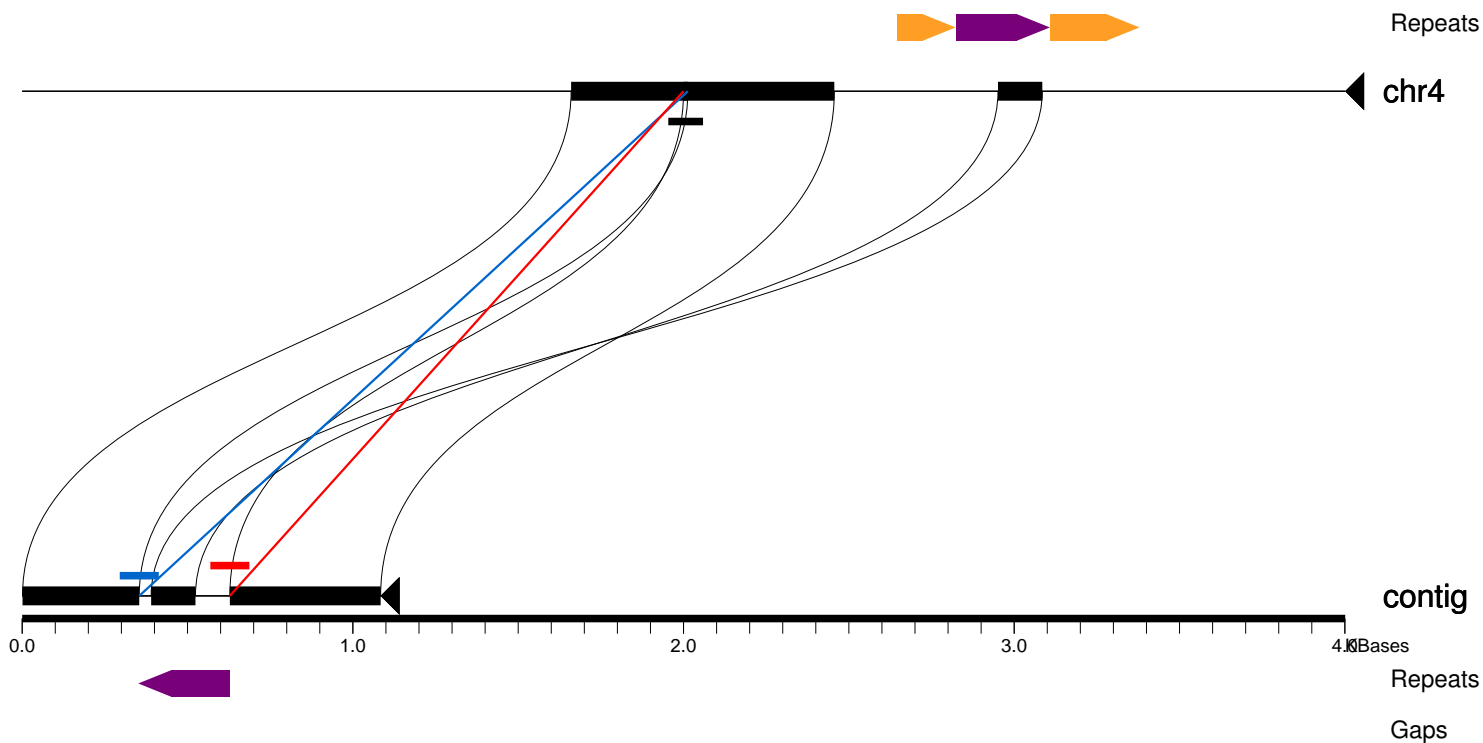

siteID: chr4\_188686137 Scafftig1 - Breakpoint: chr4:188686147

chr4:188685972-188686307

Overlap Length: 11 INS size: 298 Genotyped: Yes

```
left -----TTTTCAGGTCATCTATTGAACCCCTTGAGCTGGGAGCTTA
chrom  GATGAGGCCTCCTAGAGGGCACACATTGAAAGTTTTCAGGTCATCTATTGAACCCCTTGAGCTGGGAGCTTA
right  TTT-AG-----TAGAG---AC-----GGGGTTTCACCGT-----TTTAGCCGGGA--TGG
      NN2 22      22222  22      2NN2***1111**1111111111111111**1***1***11*11
```

```
left TTTCTTTCTTTTCCCACATTGTCCAGTGACATTAGGAGCAAACAGCCAATATCATTATACTCAT-TATTT
chrom TTTCTTTCTTTTCCCACATTGTCCAGTGACATTAGGAGCAAACAGCCAATATCATTATACTCAT-TATTT
right TCTCGATCT---CC-----TGACCTCGTGATCCGCCCGCC----TCGGCCTCCCAAAGTGCTG
      *1**11***111**1111111111111111***1*111**1*111*1***1111**1111*1*11*11*11*1
```

```
left TGACAAAAATATTGAAGAATATTGTATAATATTGTATACACACTCACCCCTGCTTCTTTTPTTTPTTTPTTT
chrom TGACAAAAATATTGAAGAATAT-----TGTATACACACTCACCCCTGCTTCTTTATAAGCGGTTGAT
right GGATTACAGGCGTGAGCCACCG-----CG-----CCCGGCCCTGCTTCTTTATAAGCGGTTGAT
      1**11*1*1111***111*11122222222221*111111*1*111*2*222222*22*
```

```
left TTTTGTGAGACGGAG-----TCTCGC-----TCTGTCCG-----CAGGCT--GGAGTG-CAGTGG-----
chrom TAGGGGAATCTAATGGTAATATTTTGCAAAATTTCTACTGCCAGATCATGCTATGAACTGTCAATGCTCTC
right TAGGGGAATCTAATGGTAATATTTTGCAAAATTTCTACTGCCAGATCATGCTATGAACTGTCAATGCTCTC
      *2222**22*22*22222222*2*2**22222***222***2222**2***22*2*2**2*2**22222
```

```
left -----CGGGATCTCGGCTCACTGCAAGCTCCGCCCTCC-----GGGTTACGCCATTCTCTGCCT
chrom CATACTACTGGAAATAG--TCATTGGTACCTCTAAAATGTAAGTGAGGGGAAAAATAGGATCTGGAGGTGA
right CATACTACTGGAAATAG--TCATTGGTACCTCTAAAATGTAAGTGAGGGGAAAAATAGGATCTGGAGGTGA
      2222222*2***22*2*22***2**22*2***2222*2222222222***222*2222**222222*222
```

Other Simple Repeat Low Complexity DNA LTR LINE SINE

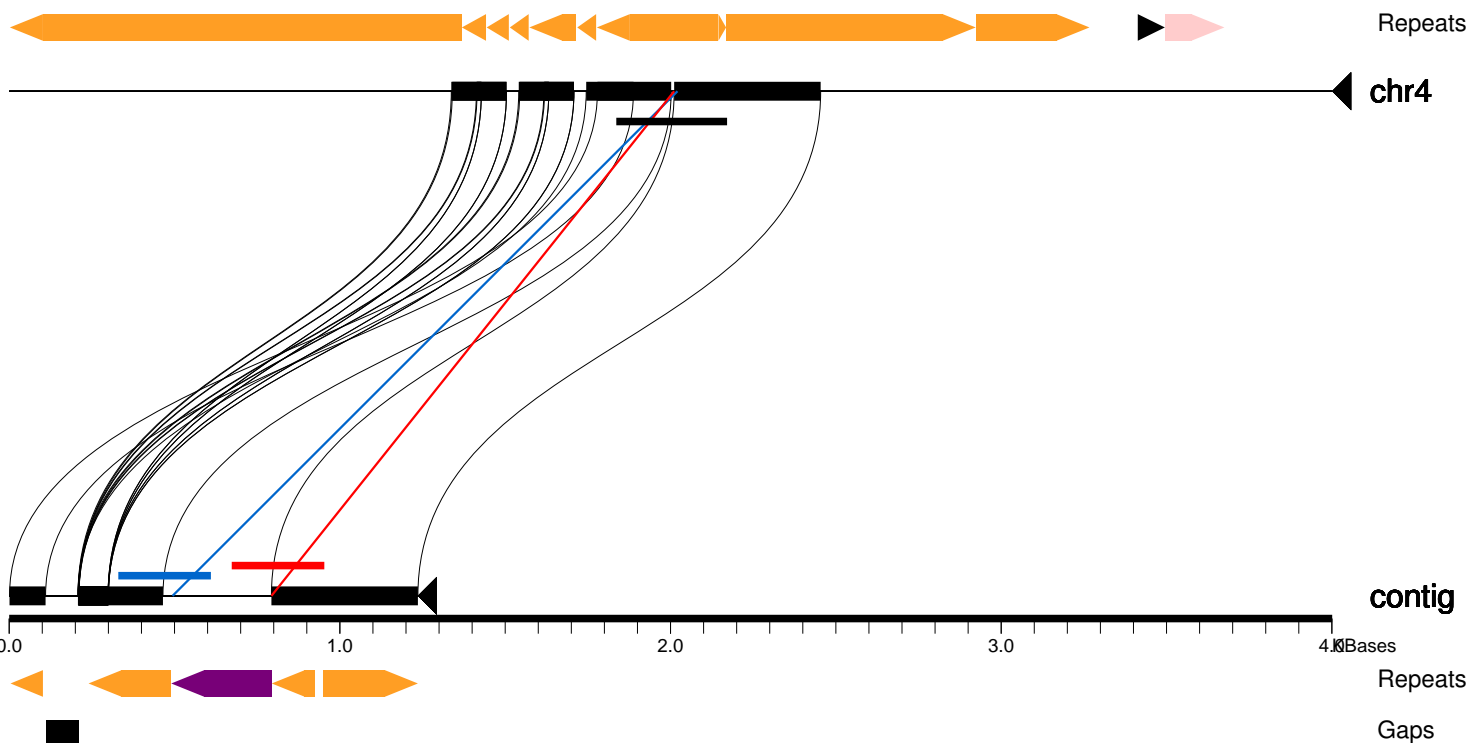



siteID: chr4\_188734585 Scafftig1 - Breakpoint: chr4:188734564  
chr4:188734515-188734623  
Overlap Length: 11 INS size: 393 Genotyped: No

```
left -----GGTAATTTTACCTGATGT-ATTACCCAAGAG-GCCTCTTAAGGACAAGGGTAGCCCTCT  
chrom -----GGTAATTTTACCTGATGT-ATTACCCAAGAG-GCCTCTTAAGGACAAGGGTAGCCCTCT  
right CCGCCCGCCTCGGCCTCCCAAAGTGCTGGGATTACAGGCGTGAGCCACC---GCGCCCGGCCAGCCCTCT  
111111111111**11111111*11**1**11*****1111*1*1***1*1111*11*11**11*****
```

left TTTNNNNNNNNNNNNNNNNNNNNNNNNNNNNNNNNNNNNNNNNNNNNNNNNNNNNNNNNNNNNNNNN  
chrom TTTATGAAGGCAATTTTGTAGAAAAAAGCCATTGCTTTATATATGGTACAT-----  
right TTTATGAAGGCAATTTTGTAGAAAAAAGCCATTGCTTTATATATGGTACAT-----  
\*\*222222222222222222222222222222222222222222222222222222222222222222

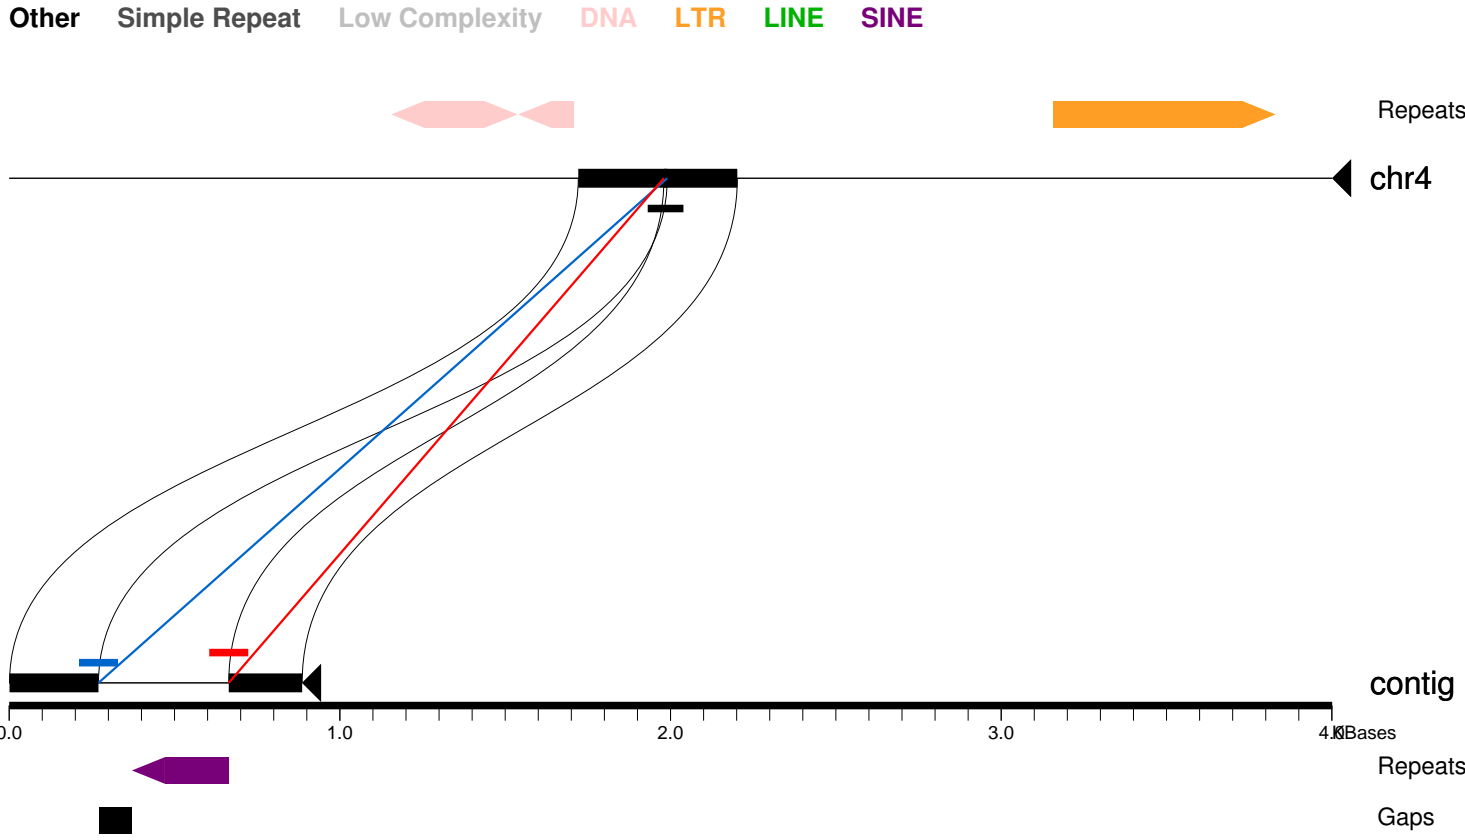

siteID: chr4\_1922207 Scaffig1 + Breakpoint: chr4:1922103  
 chr4:19221943-1922280  
 Overlap Length: 18 INS size: 356 Genotyped: No

```

left  -----TATGGTCAAAGCGAGTTACAATTTAC
chrom AATTAGGTCCTTAGTTTTTTAATAAACATT-TTTC AAGGATATATTTATGGTCAAAGCGAGTTACAATTTAC
right T-----TTAGT-----AGAGACGGGGTTTCACCG---TGTTA--GCCAGAATG-GTCTCGATCTCC
      N          22222      2N2N22NNN122222NN2    2N2**11*1**1*11*1**11*1**1*1*
left  TAAGGAAAAATATACAGATAAAACAACAACAGACTAATAAAATGCCTTAATGGATCTAGAGATAAGTGCAGG
chrom TAAGGAAAAATATACAGATAAAACAACAACAGACTAATAAAATGCCTTAATGGATCTAGAGATAAGTGCAGG
right TGACCTCGTGATCCGC-----CCGCCTCGGCCTCCCAAAGTGC-----TGGGATTACAG-----GCGTG
      *1*11111111**1*11111111*11*11*1*1**111***1***11111***111**1*111111**11*
left  AACAAAAACAAAAGAGCACTGACATCTTTTTTTAAGTNNNNNNNNNNN-----
chrom AACAAAAACAAAAGAGCACTGACATCTTTTTTTAAGTTTTAAATTATGTTTTTAAATTTTTGTTGGTA
right AGCCACCGCGCCCG---CCGACATCTTTTTTTAAGTTTTTAAATTATGTTTTTAAATTTTTGTTGGTA
      *1*1*111*11111*11111*1*1*****1*2222222222222222222222222222222222222
left  -----
chrom CATAGTAGGTGTATATATTTACCGAGCACATGAGATGTTTTGATACAGGCATGCAATGTAATAAAGCAC
right CATAGTAGGTGTATATATTTACCGAGCACATGAGATGTTTTGATACAGGCATGCAATGTAATAAAGCAC
      22222222222222222222222222222222222222222222222222222222222222222222222
left  -----
chrom ATCAAAGAGAATGAGGTATCCATCCTCTCAAGCATTGATGGAGGGAATGGATACCCCAT
right ATCANNNNNNNNNNNNNNNNNNNNNNNNNNNNNNNNNNNNNNNNNNNNNNNNNNNNNNNNNNNNNN-----
      2222NNNNNNNNNNNNNNNNNNNNNNNNNNNNNNNNNNNNNNNNNNNNNNNNNNNNNNNNNNNNN
  
```

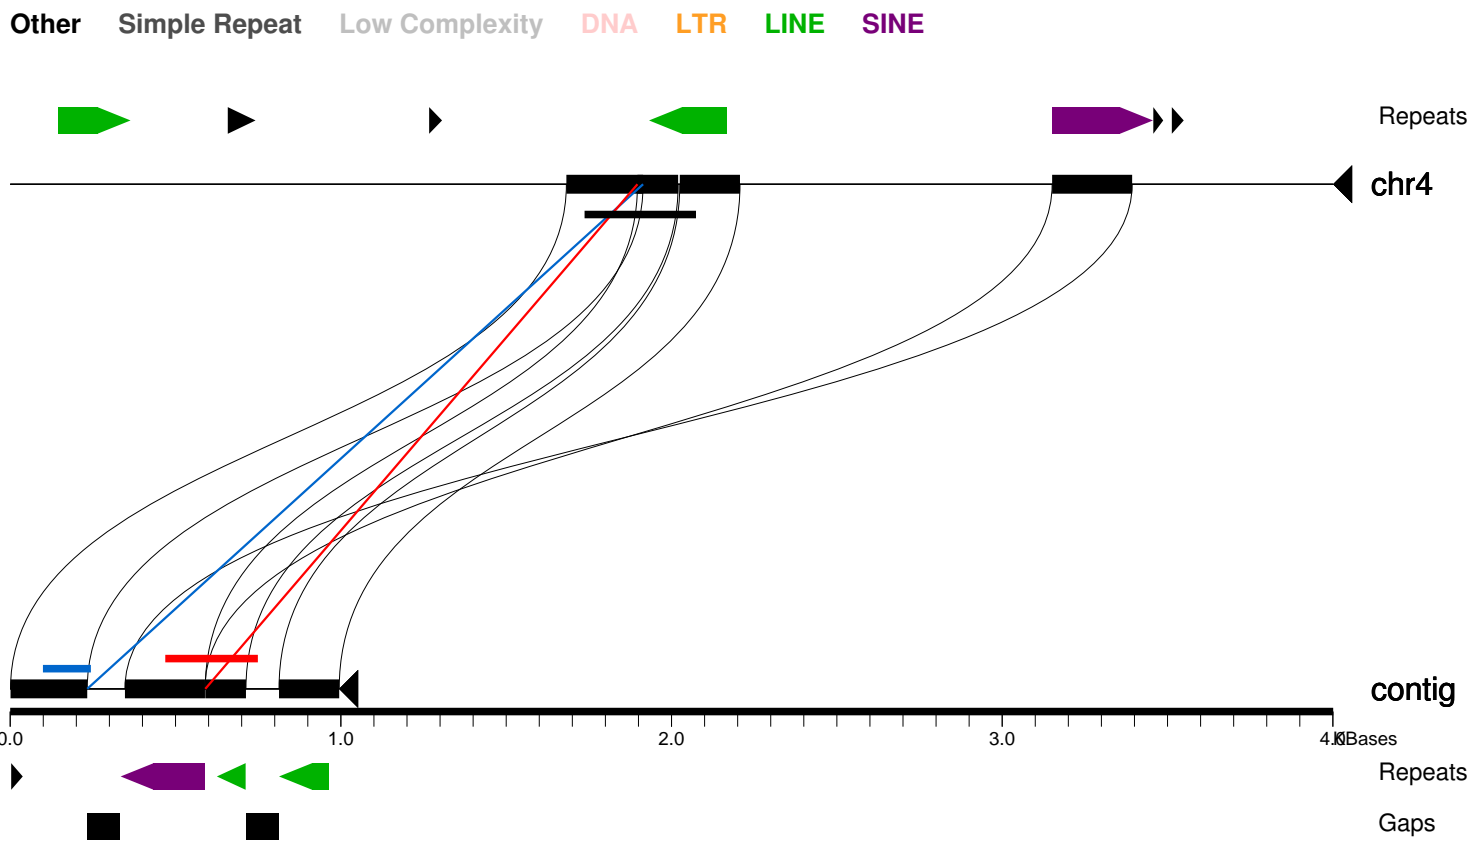

siteID: chr4\_21534558 Scaffitg2 - Breakpoint: chr4:21534573

chr4:21534413-21534749

Overlap Length: 17 INS size: 283 Genotyped: Yes

```
left -----GGATCTCTGGAGGGGATGCATTCTACTTAACTTGGCGTTTGTTTTAAATTACA
chrom ATATTCTAAATTATATGGATCTCTGGAGGGGATGCATTCTACTTAACTTGGCGTTTGTTTTAAATTACA
right -----TGGCGTGAACCCGGGAAGCGGAGCTTGC-AGTGAGC---GGAGATTGCGCCA-----CT
2NNNN1**1*1*1***1*1*11**1*1*1*1*1*111**1*1***1111*11111*1
```

```
left GGAATCTACCATATTATATTATCCAAGATTTTTAAAAATAGCTTTTATTCCTTTTCTAAATTGCATCTCA
chrom GGAATCTACCATATTATATTATCCAAGATTTTTAAAAATAGCTTTTATTCCTTTTCTAAATTGCATCTCA
right GCAGTCCGCAGT-----CCGGCCTGGGCGACAGAGCGAG-ACTCCGTCTCAAAAAAAAAAAAAAAAA
*1*1**11*11*111111111111*11*11*11111*1*1***1111*1***1*1**1***1111*1111*
```

```
left AGGTTGTTAGATTTCCCTATTTAAAAGCTAATTAATTAAGCAC-----TTTGGGAGGCCG---
chrom AGGTTGTTAGATTTCCCTATTTAAAAGCTAATTAATTAAGAGAAAAATACATACATATGTGTGAGTGTGTAT
right AAA-----AAA-----AAA***AAGCTAATTAATTTAAAGAGAAAAATACATACATATGTGTGAGTGTGTAT
*11111111*1*1111111*11*****22*22222222222222*2*2***222*222
```

```
left --AGGCGGTTGGATCATGAGGTCAAGAGAT-----CGAGACCATCCTGGCT-AACAAGGTGAAACCCCG
chrom ATATATGTATATATACATATGTATATATATACTCTTCTACACCTGCCAGCCAGAACCAACAATAATATTG
right ATATATGTATATATACATATGTATATATATACTCTTCTACACCTGCCAGCCAGAACCAACAATAATATTG
22*222*22*22**2222*2**22*2*2**222222*2*2***22**2*2*22***2*22222**2222*
```

```
left TCTCTA-CTAAAA-----AAAAATCAAAAAATTAGCTGGGCGCGGTG
chrom TCCAAGCTATATAGTACCTGCTTCCAAAAGAAGTTTAAAAATCCATTTTAGAGAGCCA
right TCCAAGCTATATAGTACCTGCTTCCAAAAGAAGTTTAAAAATCCA-----
**2*2*2***2*2*222222222222**2**2222***22*NN1NN1N1N1NNN
```

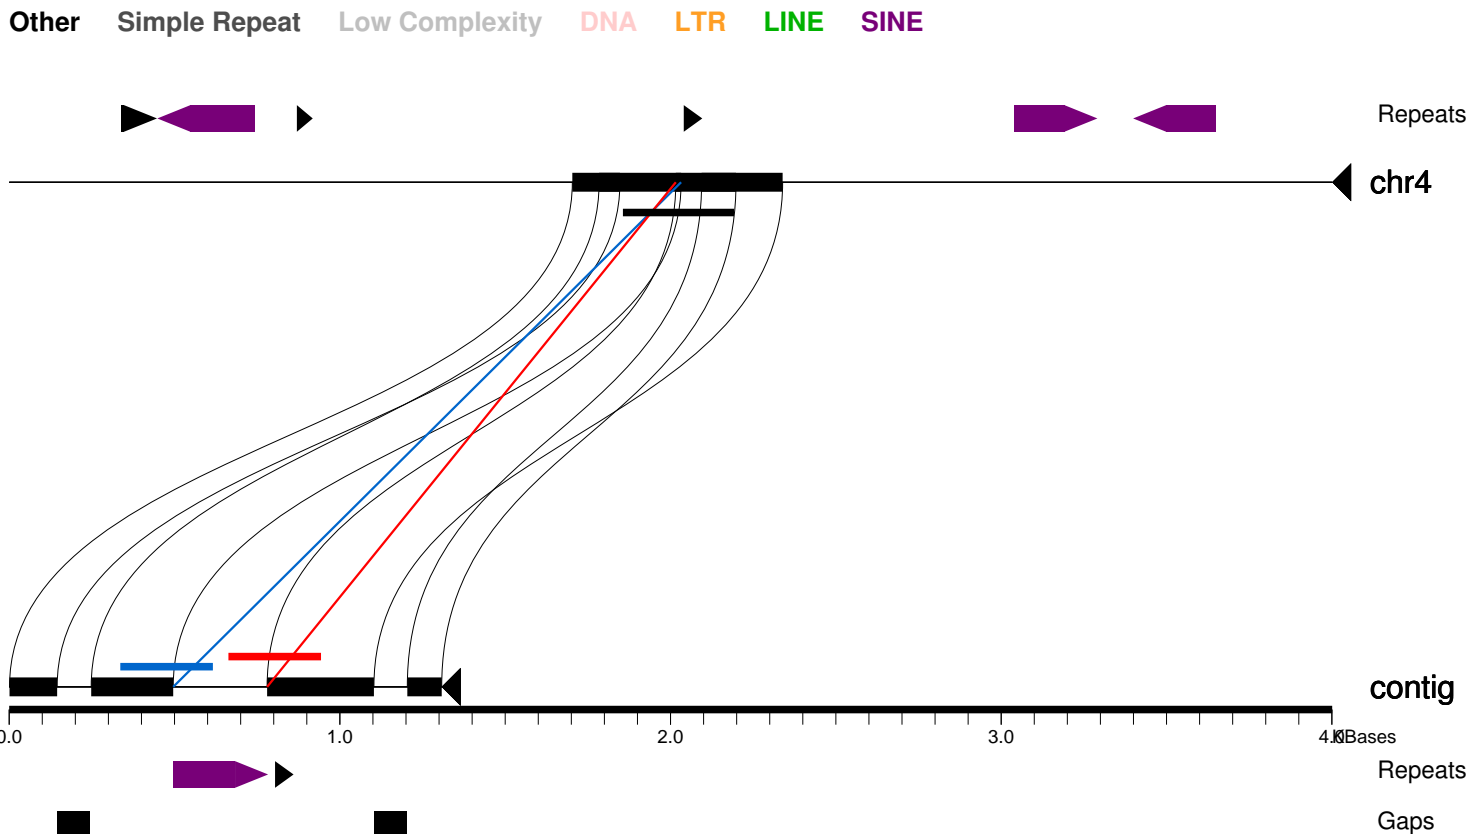

siteID: chr4\_22043193 Scafftig1 - Breakpoint: chr4:22043201

chr4:22043145-22043260

Overlap Length: 1 INS size: 416 Genotyped: No

```
left   GAAACATTAGTGATCTTGATCACAGAGTTG---CTTTAGTCTTCCATCAACTTTGGCCT--C  
chrom  GAAACATTAGTGATCTTGATCACAGAGTTG---CTTTAGTCTTCCATCAACTTTGGCCT--CTAGACATT  
right  TCCACCCGCCTCGGCCTCC-CAAAGTGCTGGGATTACAGGCGTG-AGCCACCGCGCCCGGCCTAGACATT  
      111**11111*111*1*111**1**1*1**1111*11**1*1*11*1*1**111*1**111*22222222
```

  

```
left   NNNNNNNNNNNNNNNNNNNNNNNNNNNNNNNNNNNNNNNNNNNNNNNNNNNNNNNNNNNNNNNNN  
chrom  TTTGAAGTACTAAGAGGGGTCTCATAAAATTTCTTCCAATAAAATTCCTAT---  
right  TTTGAAGTACTAAGAGGGGTCTCATAAAATTTCTTCCAATAAAATTCCTAT---  
      22222222222222222222222222222222222222222222222222222222222222222222
```

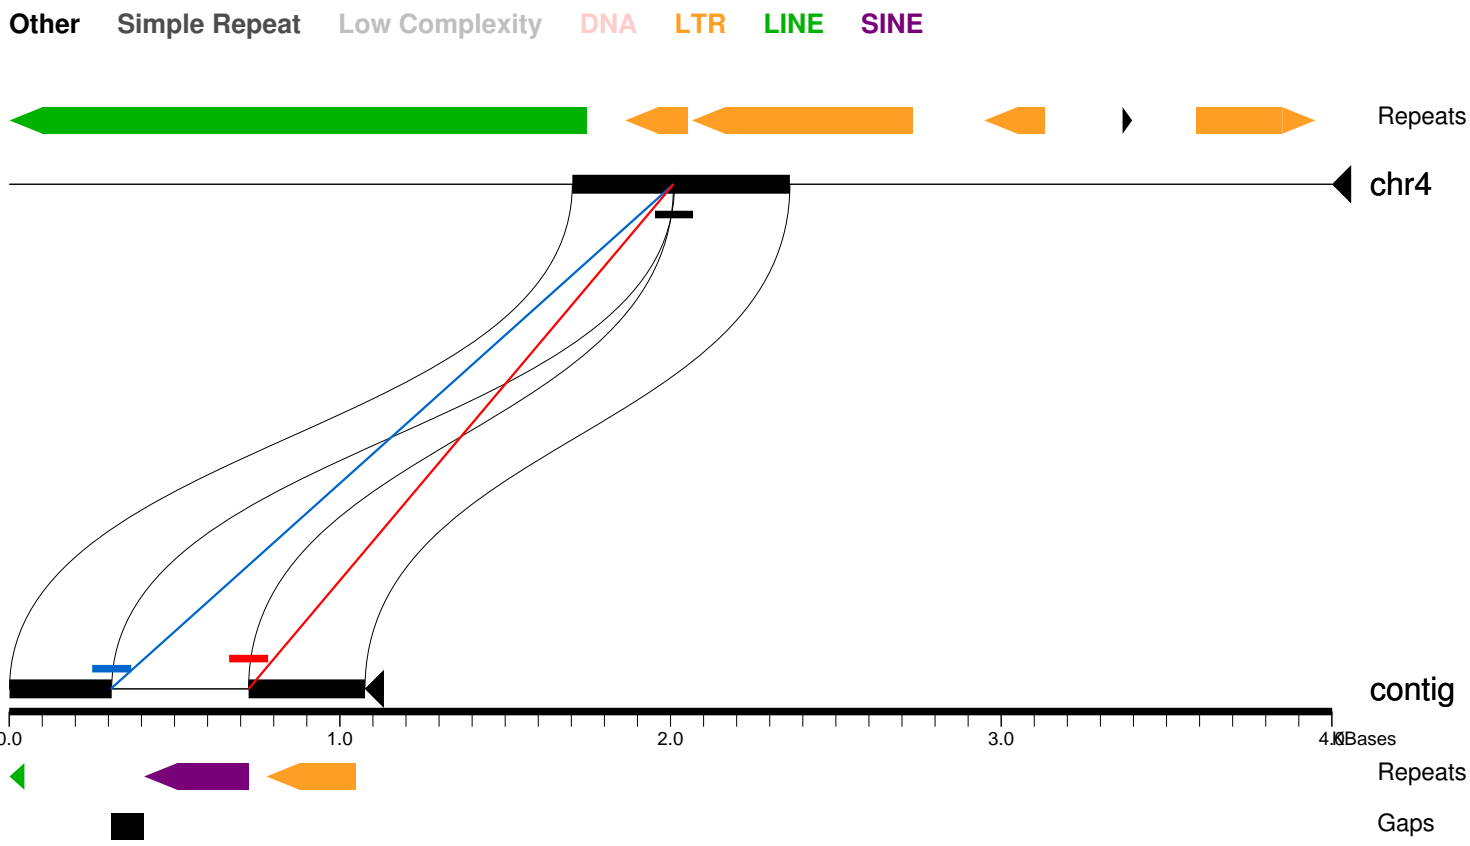

siteID: chr4\_23511006 Scaffitig2 - Breakpoint: chr4:23511009

chr4:23510965-23511068

Overlap Length: 16 INS size: 312 Genotyped: Yes

```
left   ---TCAATTTAGTCCAAAGGT---GACTC-----AAGCCAATAAGCCTTTCTCATAGAAAAGCCTG
chrom  ---TCAATTTAGTCCAAAGGT---GACTC-----AAGCCAATAAGCCTTTCTCATAGAAAAGCCTG
right  AGTCCGGCCTGGGCGACAGAGCCAGACTCCGTCTCAAAAAAAAAAAAAAAAAAAAAAAAAAAGAAAAGCCTG
      1111*1111*1*1*1*1**11111*****111111111**111**1**111111111*1*****
```

  

```
left   AACAAAGGCCGGGCGCGGTGGCTCACGCCGTGTAATCCCAGCACTTTGGGAGGCCGAGGCGGGTGG
chrom  AACAAATTACTGATA--TTGGTAATTTGTATATTTTCA-CTTTTGTTC-----TCA
right  AACAAATTACTGATA--TTGGTAATTTGTATATTTTCA-CTTTTGTTC-----TCA
      ***22222*22222*2*2*2*2222*2**2*22**2*22***22222222222222*22
```

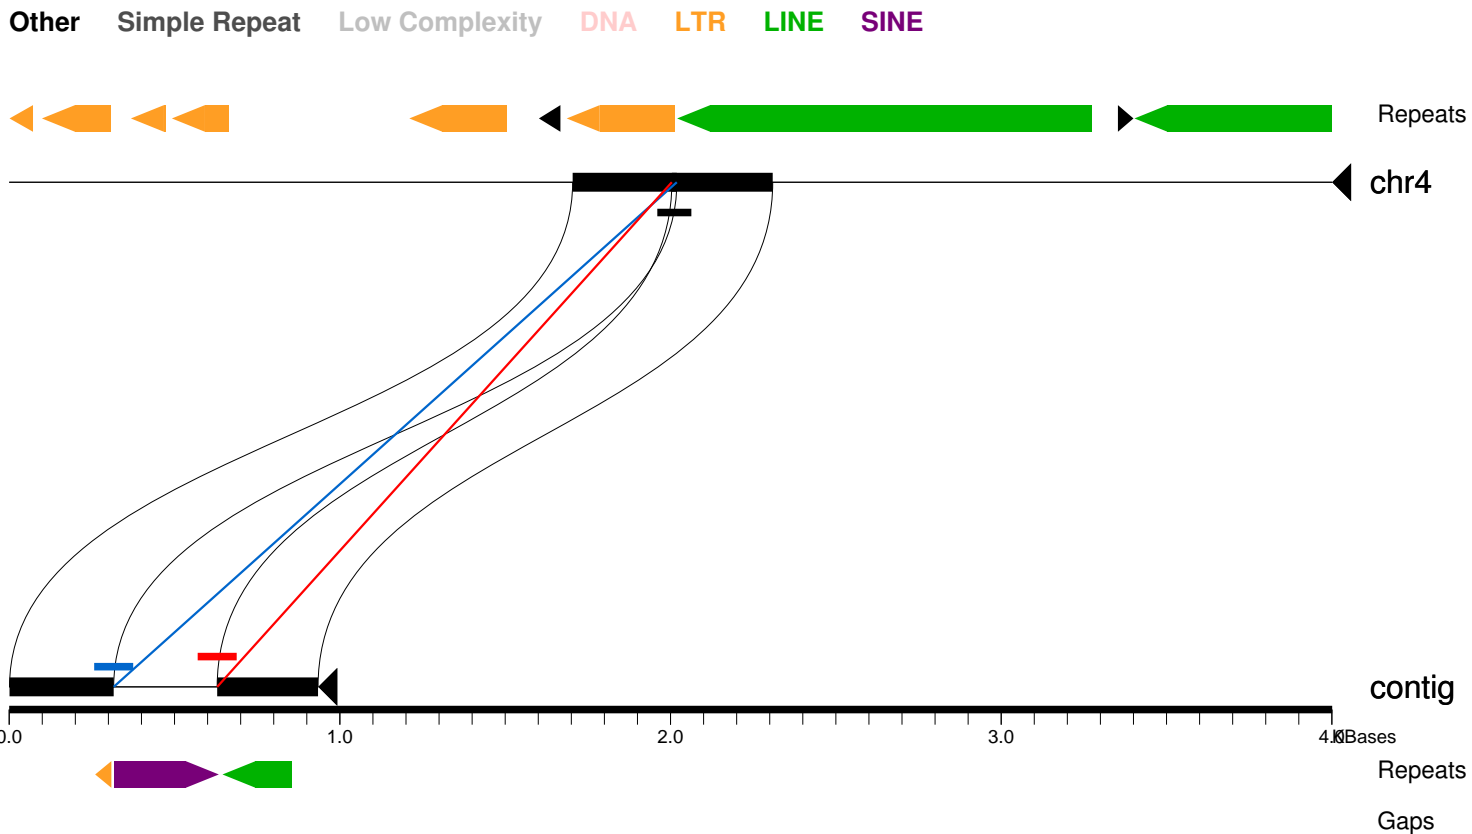

siteID: chr4\_26438636 Scaffitig3 + Breakpoint: chr4:26438618

chr4:26438571-26438677

Overlap Length: 13 INS size: 309 Genotyped: Yes

```
left  TATTTAGATGATACAAGGAAAAGT-CTGGG-----GAAAAAATATGACCTCTTTGCTAACATTC
chrom TATTTAGATGATACAAGGAAAAGT-CTGGG-----GAAAAAATATGACCTCTTTGCTAACATTC
right CCGCCCGCCTCGGCCTCCCAAAGTGCTGGGATTACAGGCGTGAGCCACCGCGCCCGGCC*TGCTAACATTC
      1111111*1111111*111111*****1*****111111111111**111*1111*1**1111*******
```

```
left  TTTTTTTTTTTTTTTTTTTTTTTTTTTTTTTTTTTGAGACAGAGTCT-CGCTCTGTTGCCAGGCTGG
chrom TTAGTTCCCCTGGCCAAGTCTTACTT-----GAATATGCGCTAGATTACACA-----
right TTAGTTCCCCTGGCCAAGTCTTACTT-----GAATATGCGCTAGATTACACA-----
      **22**2222*2222222*2**2222**2222222**2*2*2***222**2*2**222222
```

Other Simple Repeat Low Complexity DNA LTR LINE SINE

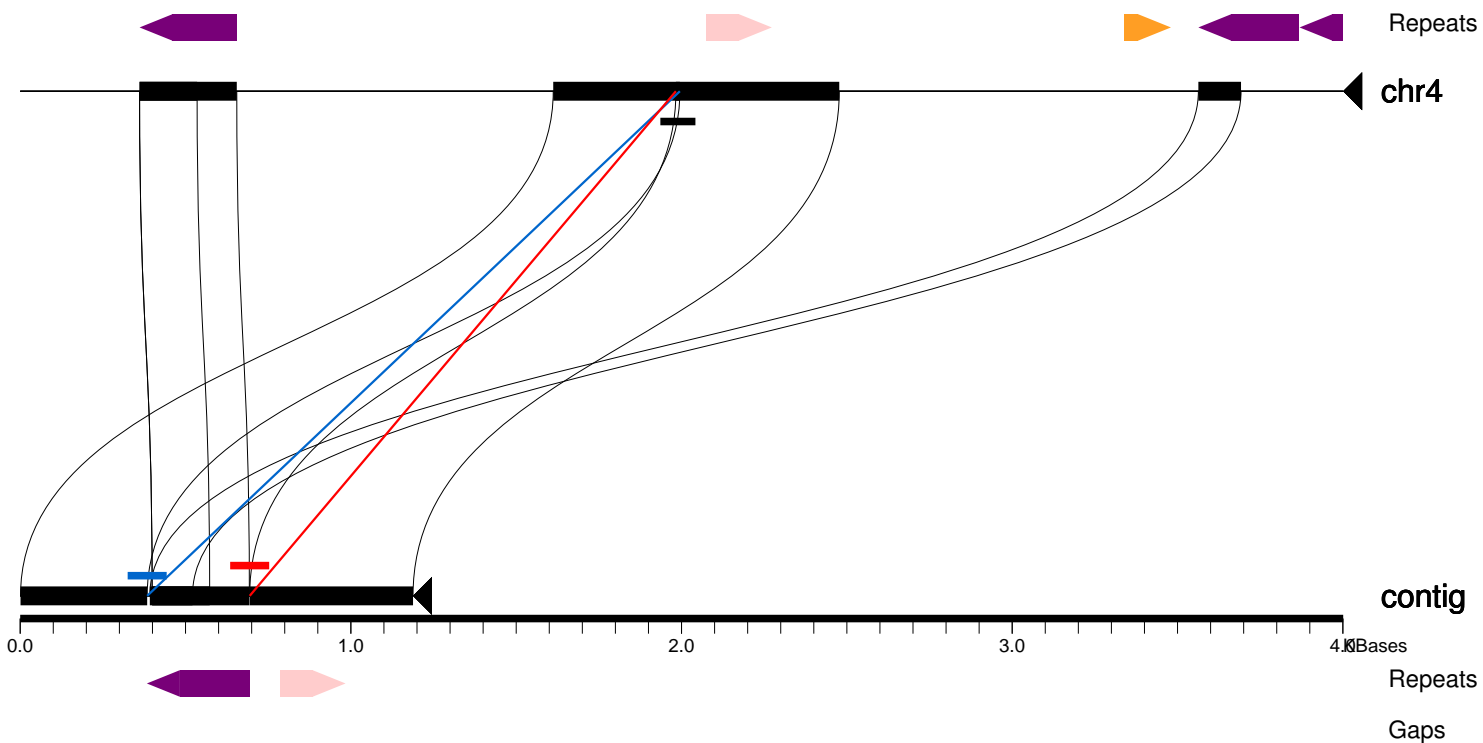

siteID: chr4\_28320751 Scaffitg1 - Breakpoint: chr4:28320755

chr4:28320711-28320811

Overlap Length: 16 INS size: 297 Genotyped: Yes

```
left  TTTCATATA-----TGTTTAATTGAA-----GTTTCTAAATGGGAAATGGGAACAAAA
chrom TTTCATATA-----TGTTTAATTGAA-----GTTTCTAAATGGGAAATGGGAACAAAA
right ATCCCGCCACTGCACTCCAGCCTGGGCGACAGAGCGAGACTCCGTCTCAAAAAAAAAAAAA---AAAAGAAA
      1*1*1111*1111111111111111**1111*11**1111111111**1**1***1111***1111**1****
```

```
left  AAAAGTAGACAAGGCCGGGCGCGGTGGCTCACGCCTGTAATCCCAGCACTTTGGGAGGCCGAGGCGGGCG
chrom AAAAGTAGACAAT-----TATAACATATATGATTC-AACA---TAGAAAAGATAGTAATTC-
right AAAAGTAGACAAAT-----TATAACATATATGATTC-AACA---TAGAAAAGATAGTAATTC-
      *****2222222222222222*2**222*2*2**2*2*2**222*2*2*22222**22222*2
```

```
left  G
chrom -
right -
      2
```

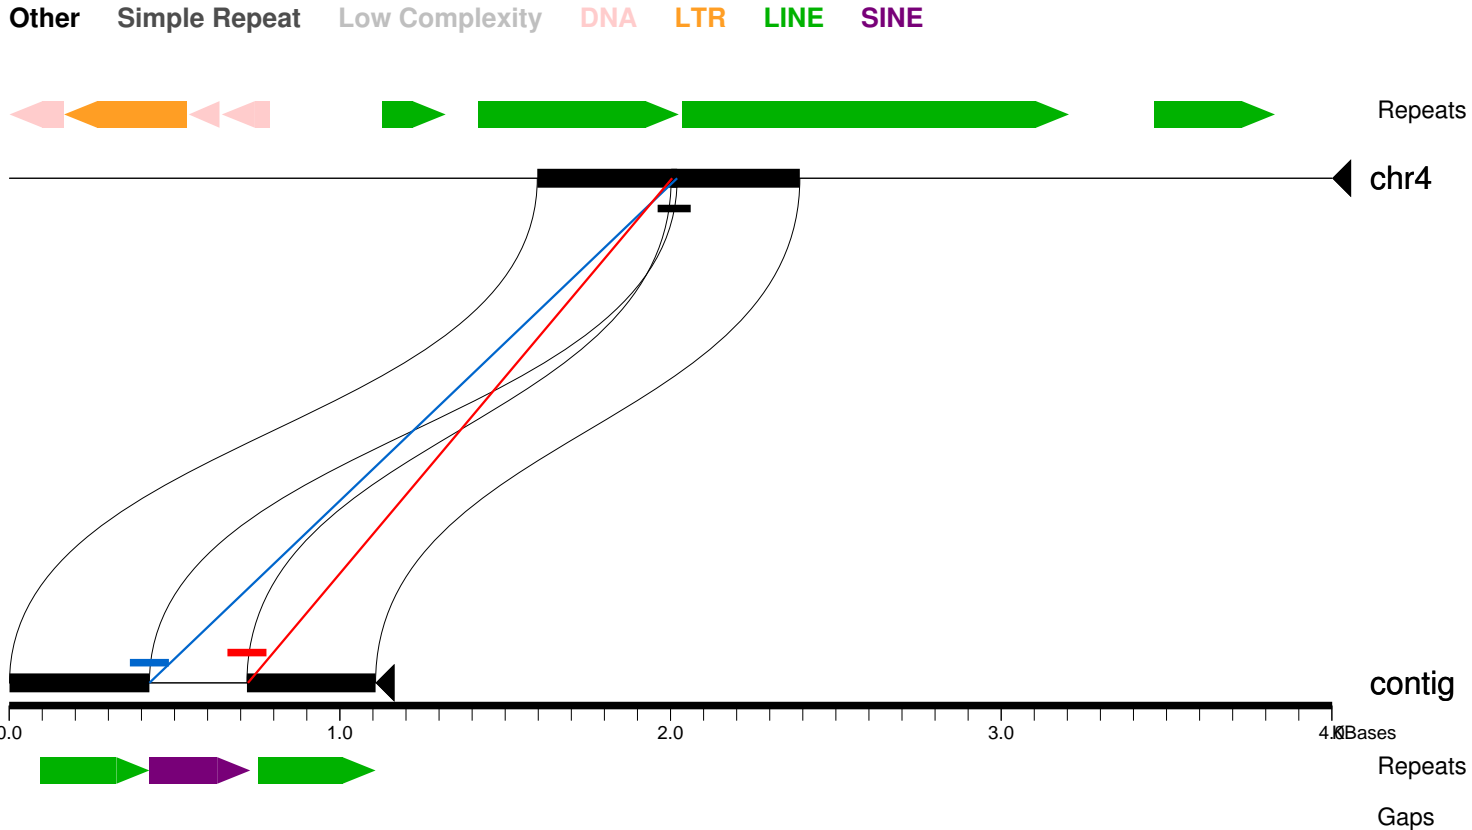

siteID: chr4\_28925344 Scaffold5 - Breakpoint: chr4:28925341

chr4:28925294-28925397

Overlap Length: 13 INS size: 479 Genotyped: No

```
left   ACACAAATAACTATTCTGTGTAATAATAC-----ATATGTATTAAGGGTAAAAGAATGAG
chrom  ACACAAATAACTATTCTGTGTAATAATAC-----ATATGTATTAAGGATAAAAAGAATGAG
right  NNNNNNNNNNNNNNNNNNNNNNNNNNNNNNNNNNNNNNNNNNNNNNNNNNNNNNNNNNNNNNN
111111111111111111111111111111111111111111111111111111111111111
*****1121**1*****
```

```
left   CAGGCGCCGGGCACGGTGGCTCACGCCTGTAATCCCAGCACTTTGGGAGGCCGAGGCGGGTGA
chrom  CAGGCTTTCCT-ATTTGCCTAACATTTTTGTTTCTCACAAATATAAATG-----
right  CAGGCTTTCCT-ATTTGCCTAACATTTTTGTTTCTCACAAATATAAATG-----
*****2222222*222**2**2**222*2*22*2*222**22*2222*2*22222222222222
```

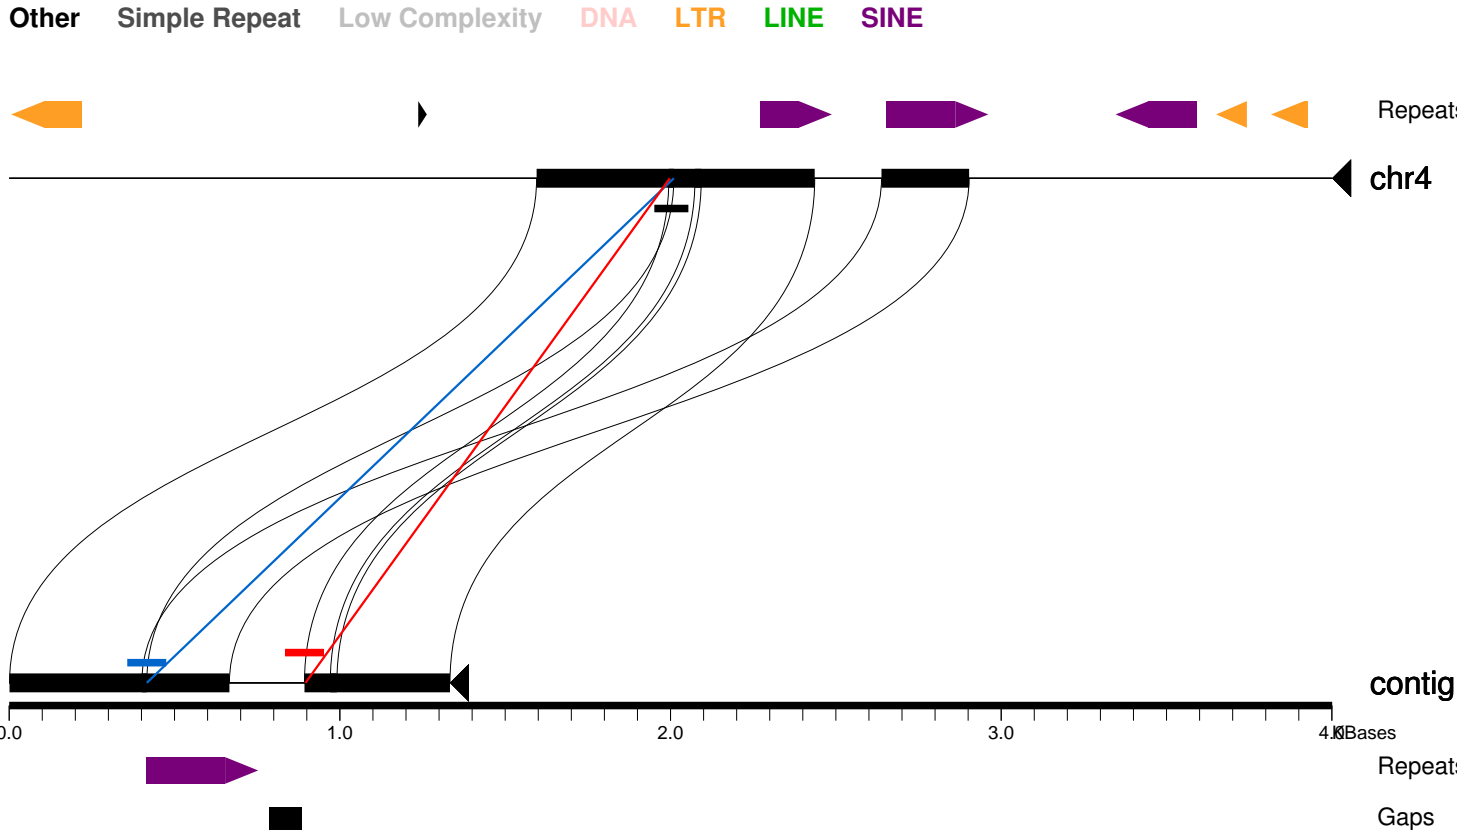



siteID: chr4\_29270512 Scaffitg3 + Breakpoint: chr4:29270516

chr4:29270356-29270685

Overlap Length: 10 INS size: 306 Genotyped: Yes

```
left -----ACTTAATTTTGAAGCTGAAATTTGATTTTGGGAAGCCTGTCAAATATGTTAAAGGTTTAG
chrom TCTATCATTGACTTAATTTTGAAGCTGAAATTTGATTTTGGGAAGCCTGTCAAATATGTTAAAGGTTTAG
right GG-AGAATGGC-----TTGAACCCGGGA-----GGCAGAGCTTGCA-----GTGAGCCG---AG
NN 2NN22N2111111111*****1*1*11*1111111111**1*111**11**11111**1*111*111**
```

```
left AACACTACAGAGAGCCCTGAAGCAACTGAAAGAGATAGAGTTAAACAGGATTATTTGACATGTTAAATG
chrom AACACTACAGAGAGCCCTGAAGCAACTGAAAGAGATAGAGTTAAACAGGATTATTTGACATGTTAAATG
right ATCCCGCCACTGCACTCC---AGC--CTGG--GCGACAGAGCGAGACTC-----CGTCTCAAAAA
*1*1*11**11*11*1**111***11***111*1*1****11*1**1111111111111*1*1*1***11
```

```
left ACATGGGAAACATTATTAAGAAATAATGTTGGCCGGGCGC--GGTGGC----TCAAGCCTGTAA-----
chrom ACATGGGAAACATTATTAAGAAATAATGTTAAACCTTCTTCAGGTTATATTTTAATGAATGTTACTAATA
right AAAAAAAAAAAAAAAAAAAAAAA*AAATAATGTTAAACCTTCTTCAGGTTATATTTTAATGAATGTTACTAATA
*1*1111***1*11*11**1*****222*222*2222***2222222*2*2*22***2*222222
```

```
left ----TCCCAGCACTTT--GGGAGGCCGAGGCGGGCGGATCAC-GAGGTCAGGAGATCGAG-ACCATCCC
chrom AGTGTTCCAAAATTTGTATGGGATTTCTAAAAATCTGCATGTGTGAGTATATGATATCAAAACATAATCATG
right AGTGTTCCAAAATTTGTATGGGATTTCTAAAAATCTGCATGTGTGAGTATATGATATCAAAACATAATCATG
2222*2***22*2*2*22****222*2*2222222*2**2222***222*2**2***2*22*22***22*
```

```
left GCTAAAACGGTGAA-----ACCCGTCTCTACTAAA-----
chrom GTTATTATATTACATTATTATACACCACAGAAATAATCAAAATTCCTTTGTC
right GTTATTATATTACATTATTATACACCACAGAAATAATCAAAATTCCTTTGTC
*2**22*222*22*2222222222***2*22222*2*2**222
```

Other Simple Repeat Low Complexity DNA LTR LINE SINE

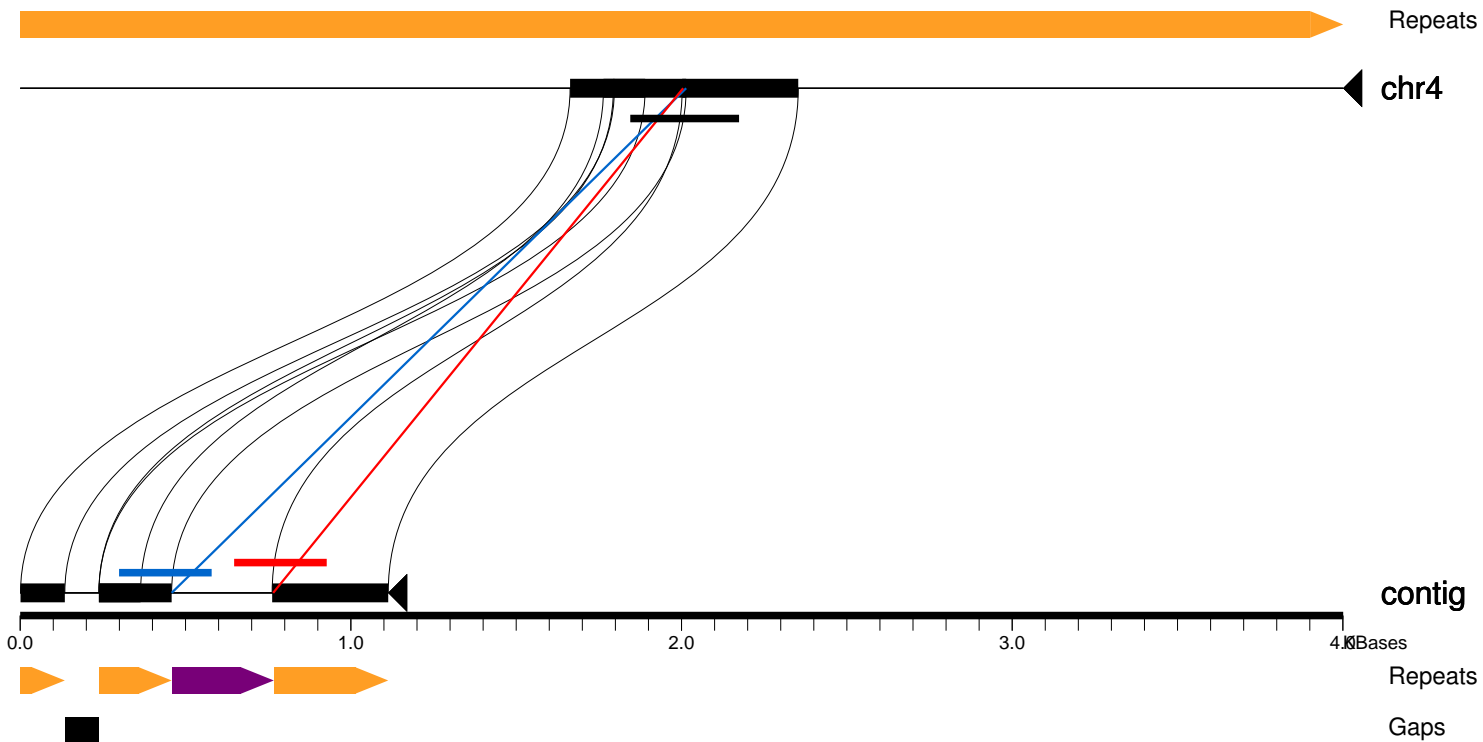

siteID: chr4\_29907835 Scaffold1 + Breakpoint: chr4:29907824

chr4:29907775-29907883

Overlap Length: 11 INS size: 487 Genotyped: No

```
left  --GCAATGATGTGTGTAC---AGCTCTCTGGTCACTAT-GTCAGTAACTTG----AGATGCCATGTAATA
chrom --GCAATGATGTGTGTAC---AGCTCTCTGGTCACTAT-GTCAGTAACTTG----AGATGACATGTAATA
right CCGCCCGCCTCAGCCTCCCAAAGTGCTGGGATCACAGGCGTGAGCCACCGCGCCCGCCGACATGTAATA
      11**11111*11*11*1*111**11**11*1****1111**1**11**11111111*11*2*****
```

  

```
left  NNNNNNNNNNNNNNNNNNNNNNNNNNNNNNNNNNNNNNNNNNNNNNNNNNNNNNNNNNNNNNNNNNNNN
chrom TTTTATCCTAATTATTGTAAATCCCAAATCACTCATCACAATGTCTGG-----
right TTTTATCCTAATTATTGTAAATCCCAAATCACTCATCACAATGTCTGG-----
      222222222222222222222222222222222222222222222222222222222222222222
```

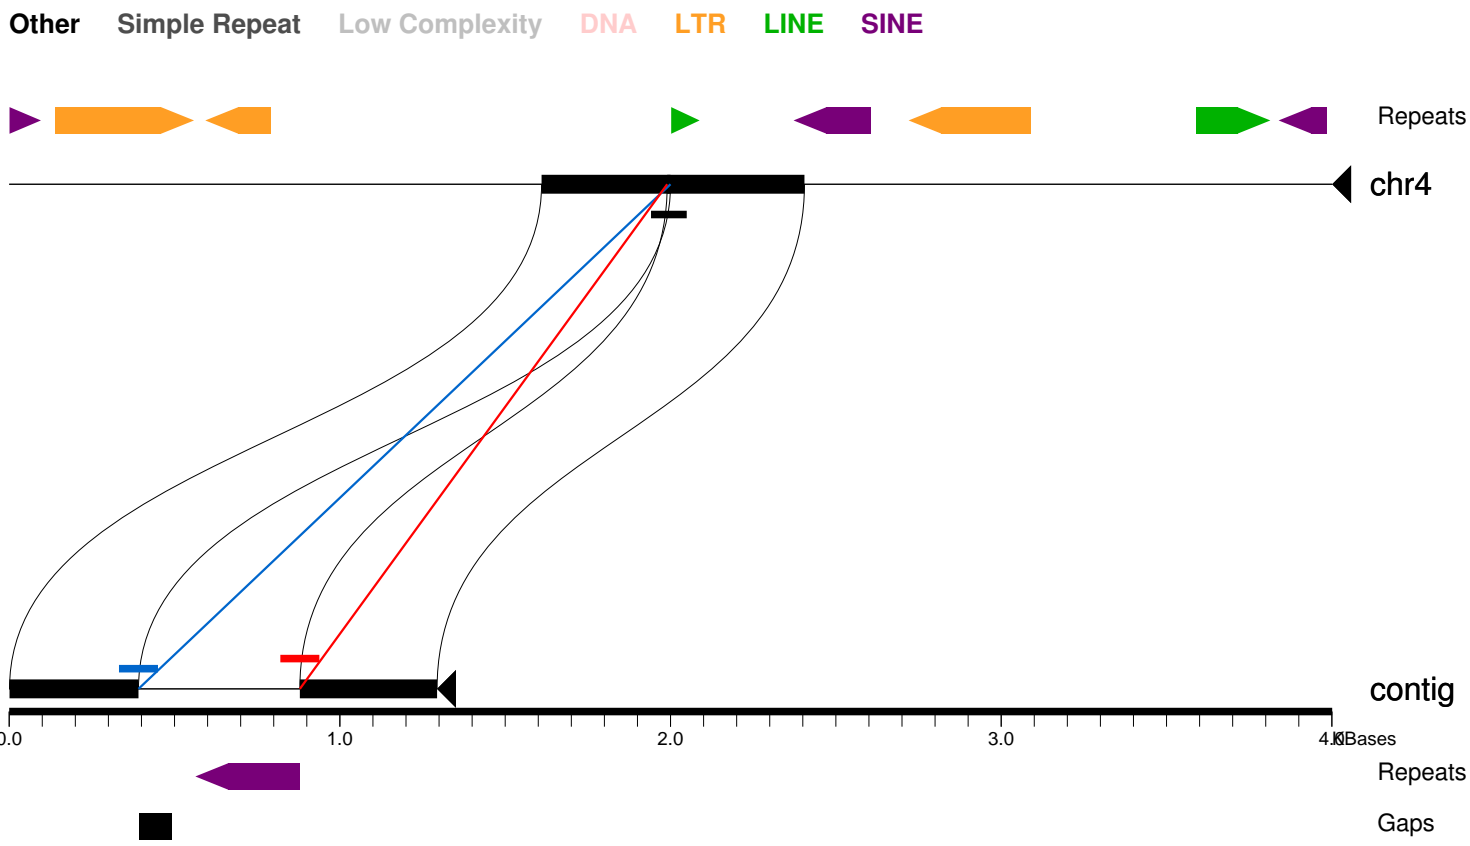

siteID: chr4\_31841429 Scafflig8 + Breakpoint: chr4:31841416

chr4:31841367-31841475

Overlap Length: 8 INS size: 300 Genotyped: Yes

```
left  AAG---GTAACA--CTTTTTA--TTCAG---TTAATTTTGTGTCTAACAGGTAATCTTACATGCATTTTT
chrom AAG---GTAACA--CTTTTTA--TTCAG---TTAATTTTGTGTCTAACAGGTAGTCTTACATGCATTTCTT
right CCGCCCGTCTCGGCCTCCCAAAGTGCTGGGATTACAGGCGTGAGCCACCGCGCCCGGCCCATGCATTCTT
      11*111**11*111**1111*11*1*1*111***11111***1111**1*111N11111*****2**
```

```
left  TTTTTTTTTTTTTTTTTTGGAGACGGAGTTTCGCTCTGTGCGCCAGGCTGGAGTGCAGTGG
chrom AAATCAGTTTAAATTGTTCCCTAGAC-----CACTTTCGTT---GCTAATTTTCATC--
right AAATCAGTTTAAATTGTTCCCTAGAC-----CACTTTCGTT---GCTAATTTTCATC--
      222*222***222**2*222222**222222*2**2***22222***2222*2**2222
```

Other Simple Repeat Low Complexity DNA LTR LINE SINE

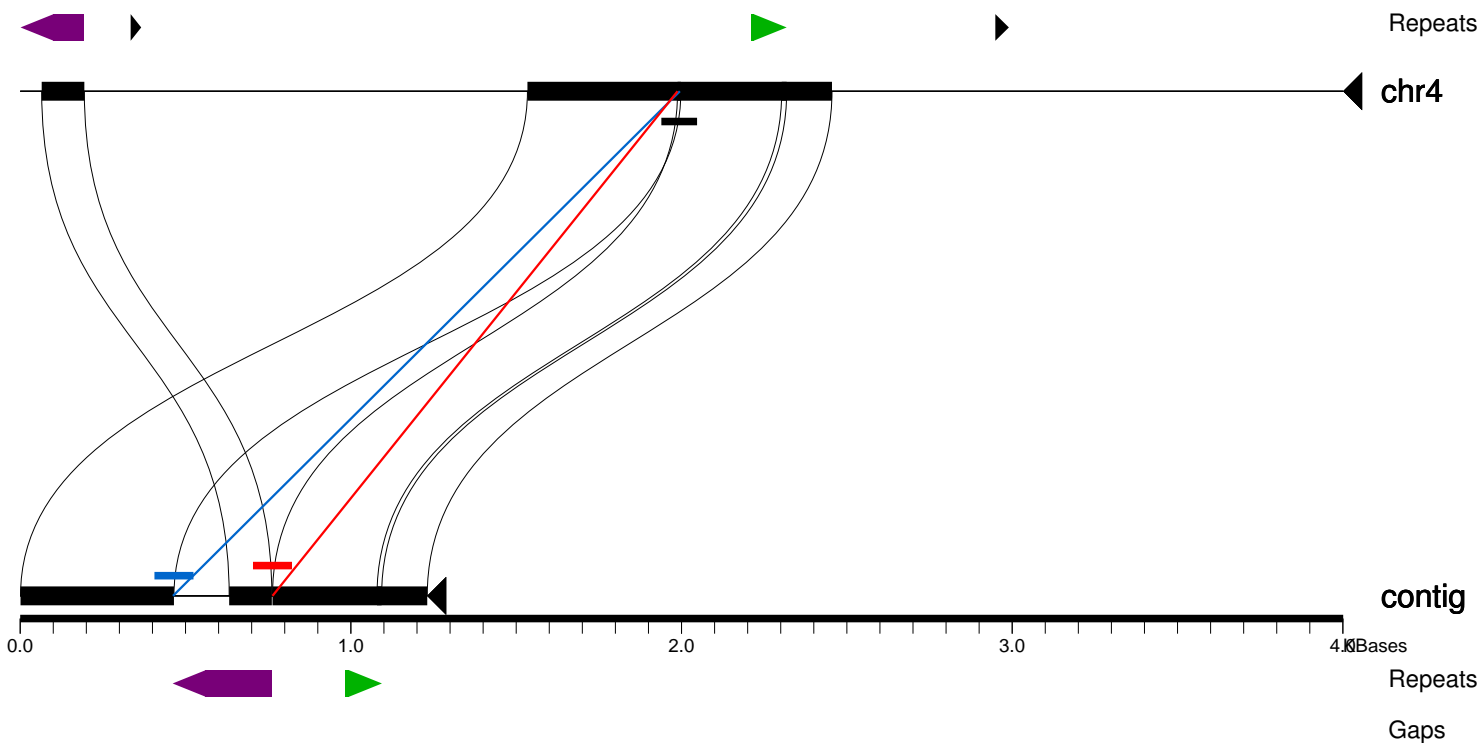





siteID: chr4\_39073829 Scaffoldig2 - Breakpoint: chr4:39073817

chr4:39073761-39073845

Overlap Length: 4 INS size: 313 Genotyped: Yes

```
left TC-----ATTTT-----TTAAA-----AAAGAC-----AACCATC-CAAACAACATT
chrom TC-----ATTTT-----TTAAA-----AAAGAC-----AACCATC-CAAACAACATT
right CAGTGAGCCAAGATTGTGCCACTGCAATCCGGCCTGGGGCTAAAGAGCGGGACTCCGTCTCAAAAAAAAAA
11111111111111111111***1*11111*11**11111111111111111111*****111111111*1**1****1**1*11
```

```
left ATATAAAGACAAAAGACTGTAATTTGGCTGGGCGCGGTGGCTCACGCCTGTAATCCCAGCACTTTGGGAGG
chrom ATATAAAGACAAAAGACTGTAATTA-----CAGGCCT-----TCCA-----TTGGCCA
right AAAAAAAAAAAAAAAAAAATGAATTA-----CAGGCCT-----TCCA-----TTGGCCA
*1*1***1*1****1*1**1***22222222222222222222**2****2222*****222222*2**222
```

```
left CCGAGGCGGGCGG
chrom CTGAA-----
right CTGAA-----
*2**2222222222
```

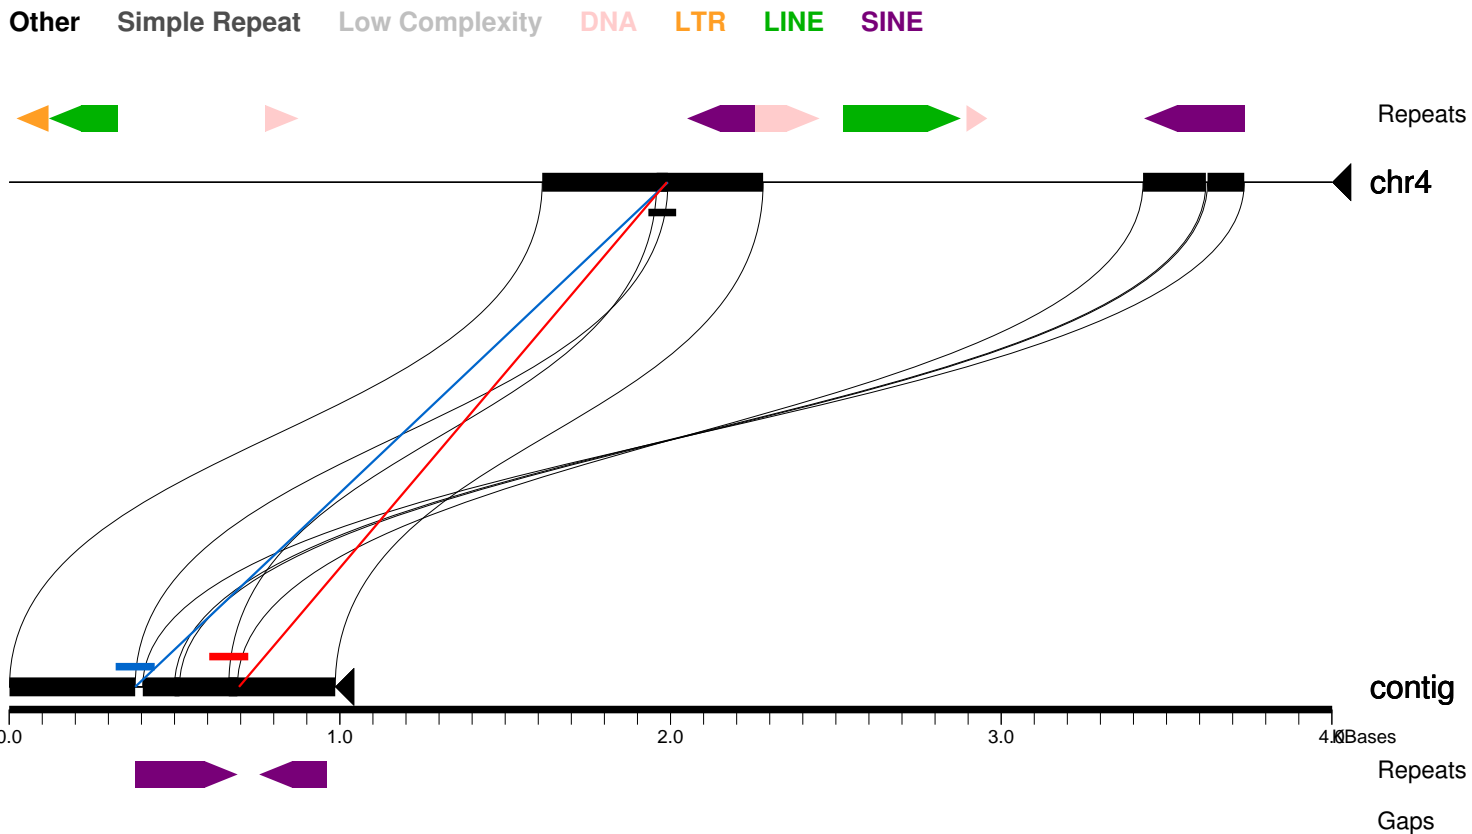

siteID: chr4\_42088028 Scaffitg11 - Breakpoint: chr4:42088041

chr4:42087997-42088091

Overlap Length: 16 INS size: 300 Genotyped: Yes

```
left  ATAGTTTGCAAATGTTTT----CATTGGC-----TCT----AATGACCAAAAAGGAATA
chrom ATAGTTTGCAAATGTTTT----CATTGGC-----TCT----AATGACCAAAAAGGAATA
right G-ATTGCGCCACTGCACTCCAGCCTGGGCGACAGAGCGAGACTCCGTCTCAAAAAAAAAAAAAAAAAAAAAA
11*1*11*1*1**111*1111*1*1***1111111111111111***1111*11*11****11*1*
```

```
left  AAAAGAAACAAGATTTGGCCGGGCGCGGTGGCTCACGCCTGTAATCCCAGCACTTTGGGAGGCCGAGGCGG
chrom AAAAGAAACAAGATTT-----TTA---TTTGTCTACAAATAATGTGGTGGT-----GATT
right AAAAGAAACAAGATT-----TTA---TTTGTCTACAAATAATGTGGTGGT-----GATT
*****222222222222222*2*2222*2*22*2*2*2*2***22*222222*222
```

```
left  GCGG
chrom TTTC
right TTTC
2222
```

Other Simple Repeat Low Complexity DNA LTR LINE SINE

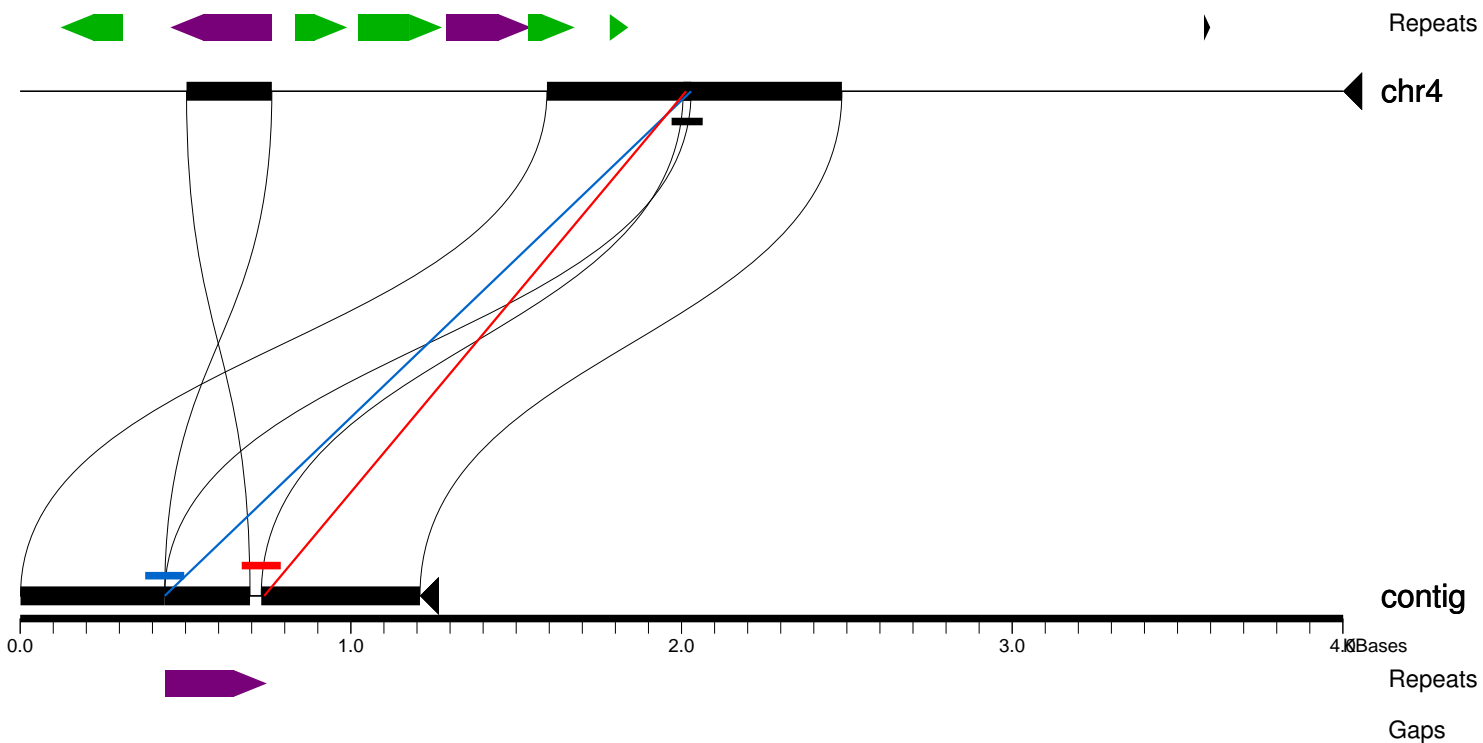





siteID: chr4\_43399970 Scaffitig5 - Breakpoint: chr4:43399975

chr4:43399927-43400034

Overlap Length: 12 INS size: 313 Genotyped: Yes

```
left  AGTTATCGTATGTGTG-----CTCCTTTTTGGCTGATGCCTTTTCCTTAGTTGAAATTTAAGCT
chrom AGTTATCGTATGTGTG-----CTCCTTTTTGGCTGATGCCTTTTCCTTAGTTGAATTTAAGCT
right CAGTCCGGCCTGGGCGACAGAGCGAGACTCCGTCTCAAAAAAAAAAAAAAAAAAAAAAAAAAATTTAAGCT
      111*111*11**1*1*11111111111****1*1*111111*111111111111*1111*****
```

```
left  ACAGGCCGGGCGCGGTGGCTCACGCCTGTAATCCCAGCACTTTGGGAGGCCGAGGCGGGT
chrom AA----CTGAAAATTAGG-----GCATATCTTTCTTTTTCTTTAACCTTCCATTTTAC--
right AC----CTGAAAATTAGG-----GCATATCTTTCTTTTTCTTTAACCTTCCATTTTAC--
      *N2222*2*2222222**22222**2*2*22*2*22222****222222**222222222
```

Other Simple Repeat Low Complexity DNA LTR LINE SINE

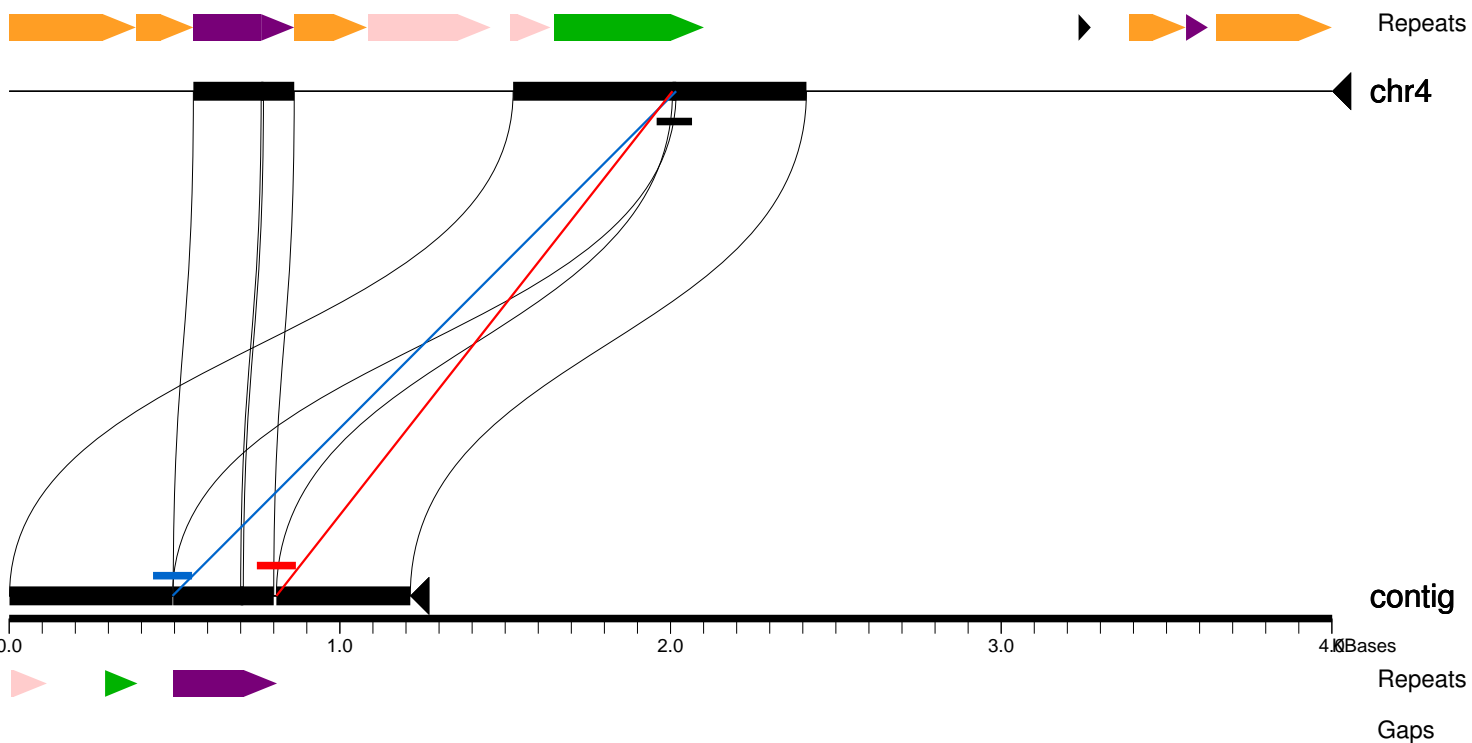

siteID: chr4\_44842111 Scaffitg1 - Breakpoint: chr4:44842129

chr4:44842099-44842188

Overlap Length: 16 INS size: 138 Genotyped: Yes

```
left  ATGTCAAAAAGCTTT-----TTACT-----TTC-----TTTTTTTATTATGGCCT
chrom ATGTCAAAAAGCTTT-----TTACT-----TTC-----TTTTTTTATTATGGCCT
right ACTGCGGACTGCGGTGGCGCAATCTCGGCTCACTGCAAGCTCCGCTTCCCAGGTTACAGTATTATGGCCT
      *111*11*11*11*11*111111111111111*1***1111111111111***11111*1111*****
```

```
left  CTTC TTTTTTTTTTTTTTTTTTTTTTTTTTTTTTTTTTTTTTTTTTTTTTTTTTTTTTTGAGACGGAGTCTCGCTCT
chrom CTTC TAGAATTTTGCTTTTAATGTCTACTTGCGT-----AGGCTGAGA-TTGCT--
right CTTC TAGAATTTTGCTTTTAATGTCTACTTGCGT-----AGGCTGAGA-TTGCT--
      ****2222****22****22*2*2*22**222*22222222222222222222**2*2***22*2***22
```

```
left  GTCGCCCA
chrom -----A
right -----A
      2222222*
```

Other Simple Repeat Low Complexity DNA LTR LINE SINE

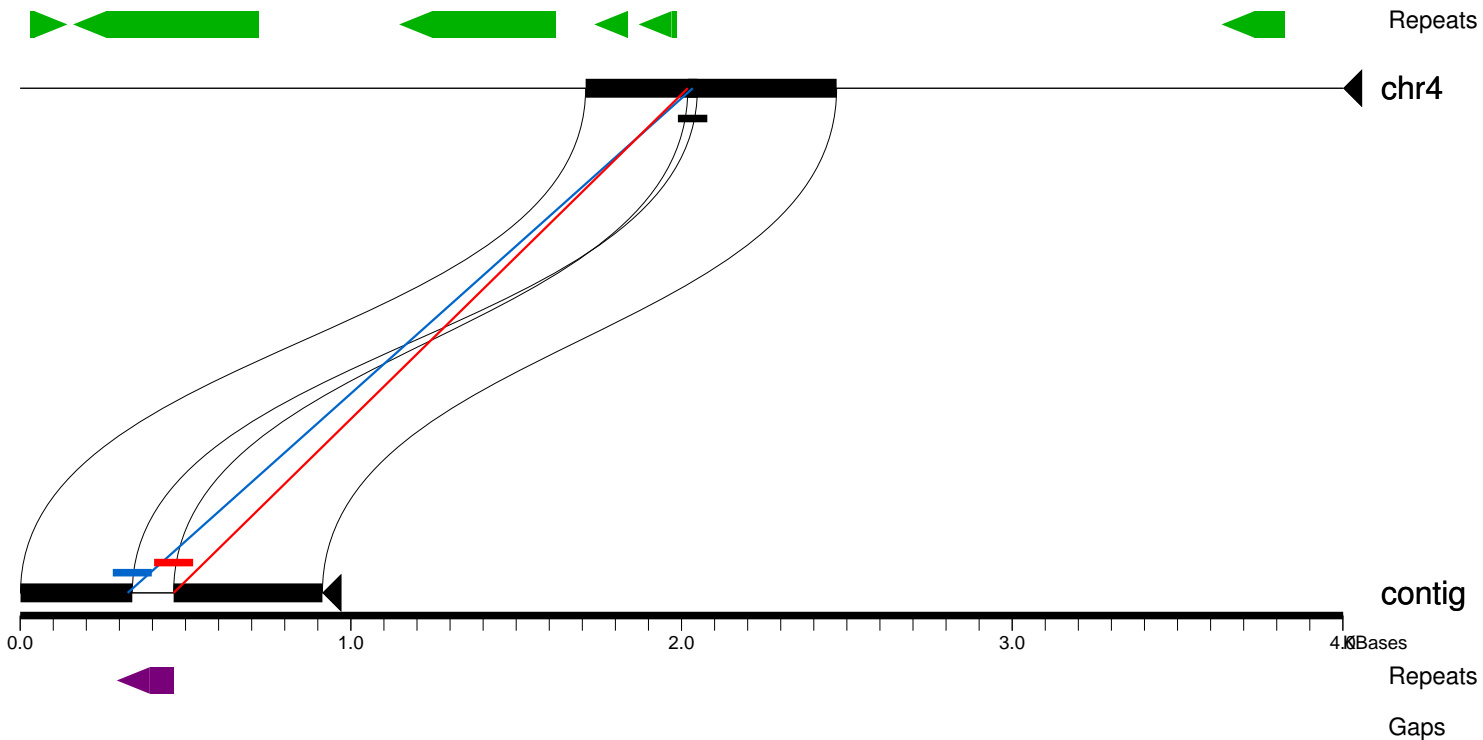

siteID: chr4\_46784902 Scaffitig1 - Breakpoint: chr4:46784922

chr4:46784875-46784981

Overlap Length: 13 INS size: 371 Genotyped: No

```

left ACATCTGAACATCTGAGGGAACCAACTCTGGACACACCATCTTTAAG-----AACTGTAACAC
chrom ACATCTGAACATCTGAGGGAACCAACTCTGGACACACCATCTTTAAG-----AACTGTAACAC
right NNNNNNNNNNNNNNNNNNNNNNNNNNNNNNNNNNNNNNNNNNNNNNNNNNNNNNNNNNNNNNNNNNN
111111111111111111111111111111111111111111111111111111111111111111111
*****

```

```

left TCGGCCGGGCGCGGTGGCTCACGCCTGTAATCCAGCACTTTGGGAGGCCGAGGCGGGCGG
chrom TCA-CCGTGAG----GGTCCGCGGCT-TCATTCTTGAAGTCAGCAAAAACCAAGAA-----
right TCA-CCGTGAG----GGTCCGCGGCT-TCATTCTTGAAGTCAGCAAAAACCAAGAA-----
**22***2*2*2222**22*2**2**2*2**2*22*2*2*22*22*22*22**2**22222222

```

Other   Simple Repeat   Low Complexity   DNA   LTR   LINE   SINE

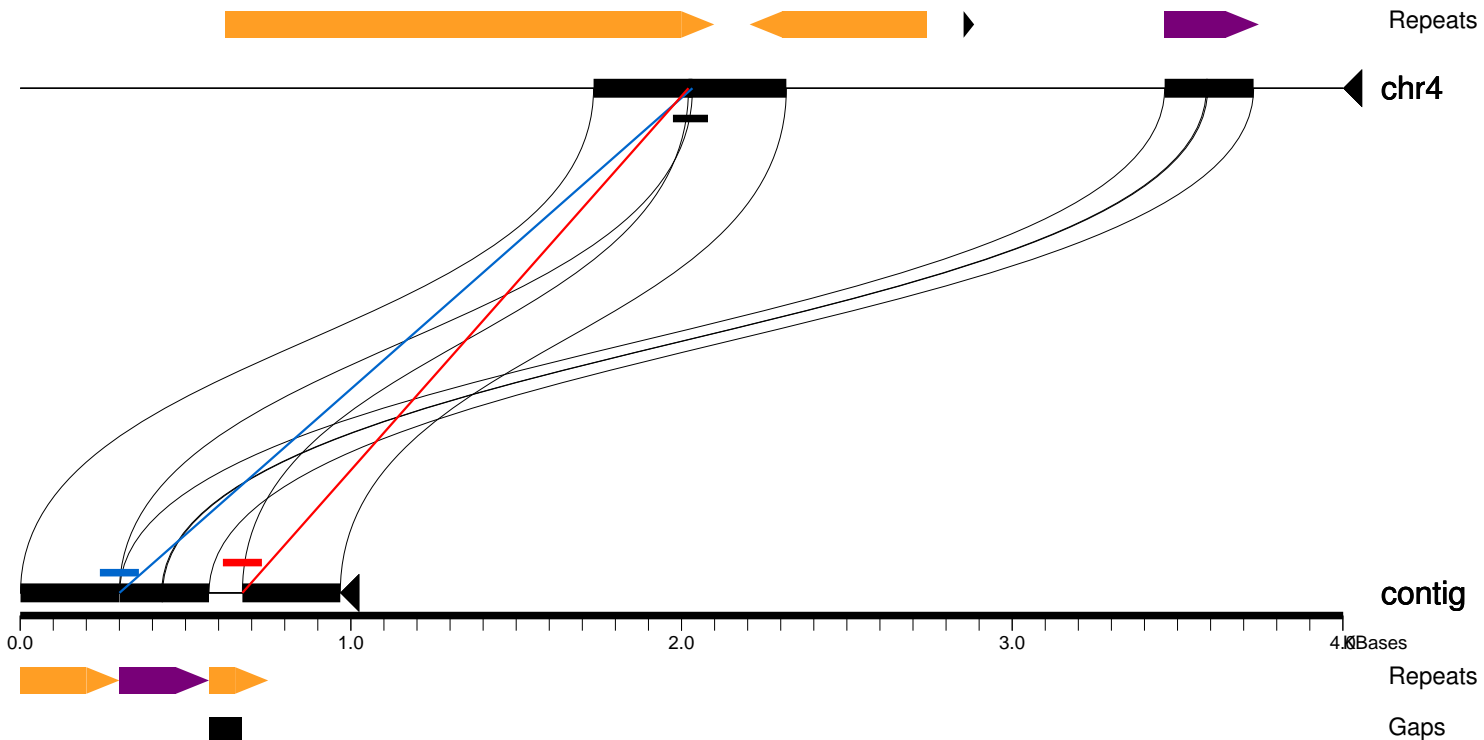

siteID: chr4\_47496535 Scaffitig2 - Breakpoint: chr4:47496518

chr4:47496470-47496574

Overlap Length: 12 INS size: 308 Genotyped: Yes

```
left   TCTGTAAACAACATAGGCTGTATTCTTTT-----AATATACTTTGGATATAATAAAG
chrom  TCTGTAAACAACATAGGCTGTATTCTTTT-----AATATACTTTGGATATAATAAAG
right  TGGG----CGACAGAGCGAGACTCCGTCTCAAAAAAAAAAAAAAAAAAAAAAAAAAAAAAAAG
      *11*1111*1***1**111*11*1*1*1*11111111111111111111**1*1*111111*1*1**1****
```

```
left   TTAGATTATCACGCCTGTAGTCCCAGCACTTTGGGAGGCCGAGGCGGGTGGATCATGAGGTCAGGAG-
chrom  TTAGATTATCACGCCTGTAGTCCCAGCACTTTGGGAGGCCGAGGCGGGTGGATCATGAGGTCAGGAG-
right  TTAGATTATCACGCCTGTAGTCCCAGCACTTTGGGAGGCCGAGGCGGGTGGATCATGAGGTCAGGAG-
      *****2222222222***2**22**2**222*22*222*22*222*22***222**2***22222
```

Other Simple Repeat Low Complexity DNA LTR LINE SINE

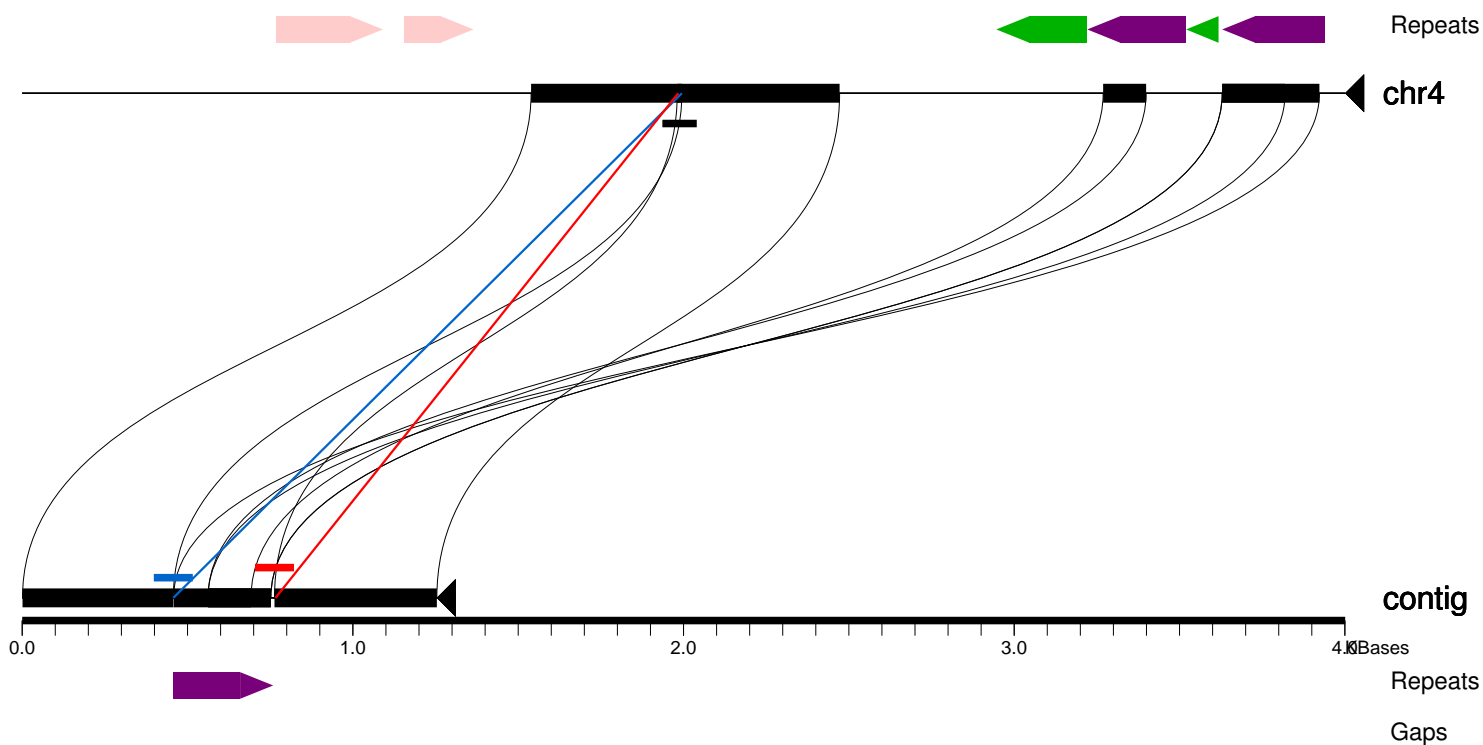



siteID: chr4\_53222451 Scaffoldig4 - Breakpoint: chr4:53222441  
 chr4:53222395-53222500  
 Overlap Length: 14 INS size: 299 Genotyped: Yes

```

left  GAAAGAT-----GAATGTTTGTTCATGTGG-----GTCTTTATTCCCTTCTATGTTTAAAAATGTATCT
chrom GAAAGAT-----GAATGTTTGTTCATGTGG-----GTCTTTATTCCCTTCTATGTTTAAAAATGTATCT
right CCACTGCACTCCAGCCTGGGCGACAGAGCGAGACTCCGTCTCAAAAAAAAAAAAAAAAAAAAAAATAAAATGTATCT
      11*111111111111*11**111*1**1111*11111111*****11*1111111111*111111*****
left  TTAGGCCGGGGCGCGGTGGCTCACGCCGTGTAATCCCAGCACTTTGGGAGGC-CGAGGCGGGCGG
chrom TTAATAAAAAA---GGTT-CTAAAG---GAAAAAGAAGAAC---AGAAGATTCAAAACATT---
right TTAATAAAAAA---GGTT-CTAAAG---GAAAAAGAAGAAC---AGAAGATTCAAAACATT---
      **2222222222***22**2*2*222*2**2222**2**2222*2**222*2*22*222222
  
```

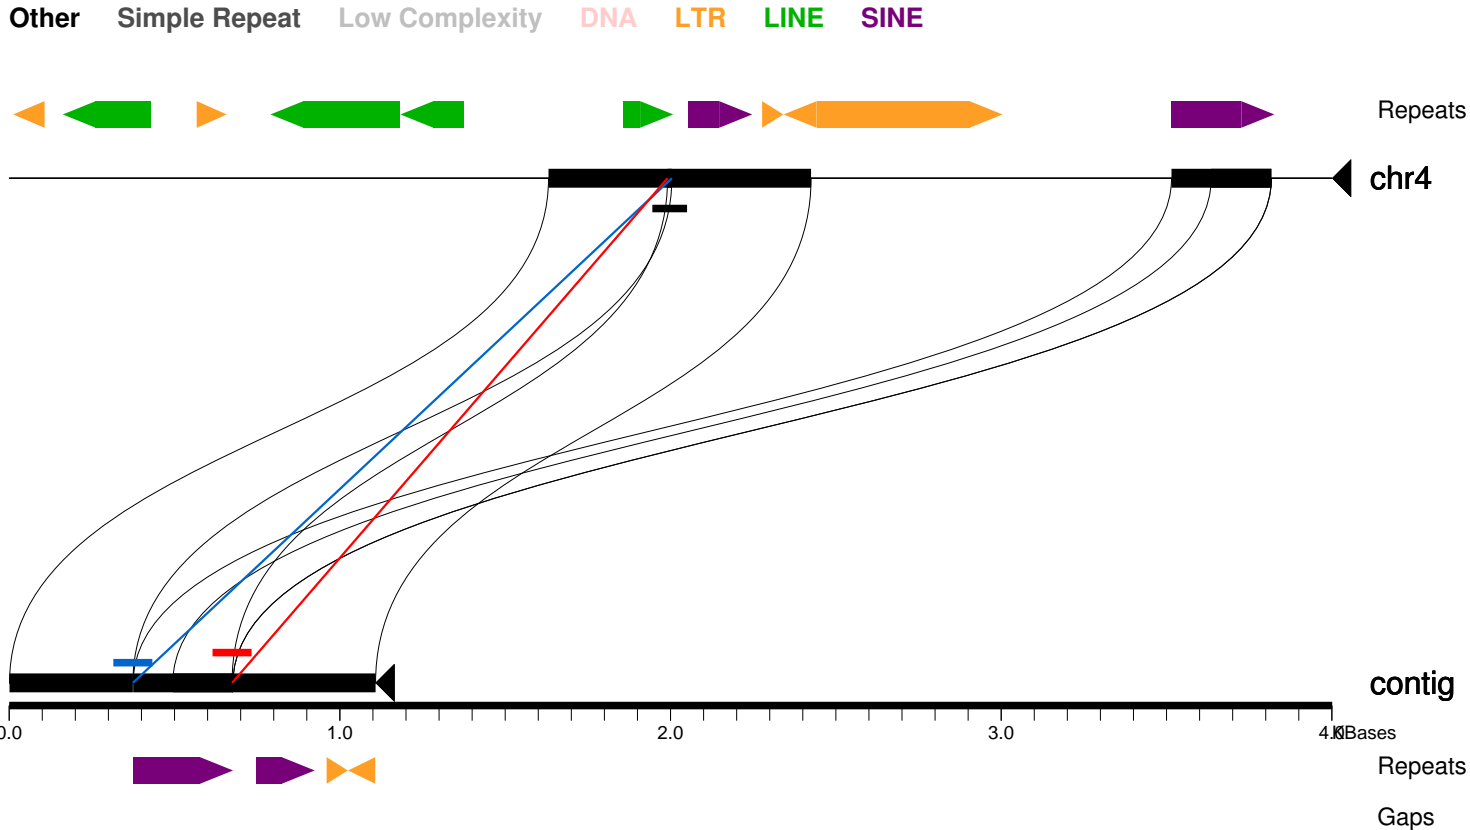

siteID: chr4\_53851852 Scaffitg2 - Breakpoint: chr4:53851836

chr4:53851676-53852012

Overlap Length: 17 INS size: 295 Genotyped: Yes

```

left  -----TGTTTTGGAGAGGTTTCTAGCACCATATAGCAGCATATTATAAAAACCATGGCA
chrom GTTGATAAAATTTGAGGGTGTTTTGGAGAGGTTTCTAGCACCATATAGCAGCATATTATAAAAACCATGGCA
right CT-----GAGGCAG-----GAGAA-TGGCGTGAACCCGGGAGGCGGAGCTT-----GCA
N2          2222N1*11111****11*11*11*1***1111**11*1*11**1111111111***

```

```

left  GTTTTATTCTATTAAGAAATCACACCCCCAGACGTATCTGAAAAACTTCCCTTTGGAAGATTGCAAAAAGGC
chrom GTTTTATTCTATTAAGAAATCACACCCCCAGACGTATCTGAAAAACTTCCCTTTGGAAGATTGCAAAAAGGC
right GTG--AGCC-----GAGATC---CCGCCA-----CTGCATTCCAGCCTGGGCGACAGAGCGAGACTC
**111*11*111111**1***111**1***1111111**1*111*11**11*11*1*11**1*1*11*

```

```

left  CAGATGCAAAATTTTGTCTTAAAAAATTAGTCCAGGAGGCCGGGCG-CGGTGGCTCACGCCTGTAA----
chrom CAGATGCAAAATTTTGTCTTAAAAAATTAGTCCAGGAGGCCGGGCG-CGGTGGCTCACGCCTGTAA----
right TGCTCAAAAAAAAAAAAAAAAAA*AAAAAATTAGTCCAGGAATATAAAATATCAAATGTTTATGATTTTAGAAGG
1111*11**11111111111******222222222*2222*2*2*2*2*2*2*2*2222

```

```

left  TCCAGCACTT---TGGGAGGCCGAGGCGGGCGGATCACG---AGGTCAGGAGATCGAGACCATCCCGGC
chrom TCCAAATATCTGTCTGGAATTTCTGGGTTGAAGTTAGCAGGTTAAGGTCAGTTTCTTTTGAAGTCTCTCC
right TCCAAATATCTGTCTGGAATTTCTGGGTTGAAGTTAGCAGGTTAAGGTCAGTTTCTTTTGAAGTCTCTCC
***2*22*22*222***2*22*2*2*22*22222*2**2*222*****2*222*222**222**2*22*

```

```

left  TAA-----AACGG-----T--GAAACCCGTCT-----CTACT-----AAA
chrom AAATATGCAACAGATGACACT--GCAATTCAGCTGTGTTCACCTATTCTTAGAACAAA
right AAATATGCAACAGATGACACTTTGCAATTCAGCTGTGTTCACCTA-----
2**22222***2*222222*11*2**22**22**2222222***N1          111

```

Other Simple Repeat Low Complexity DNA LTR LINE SINE

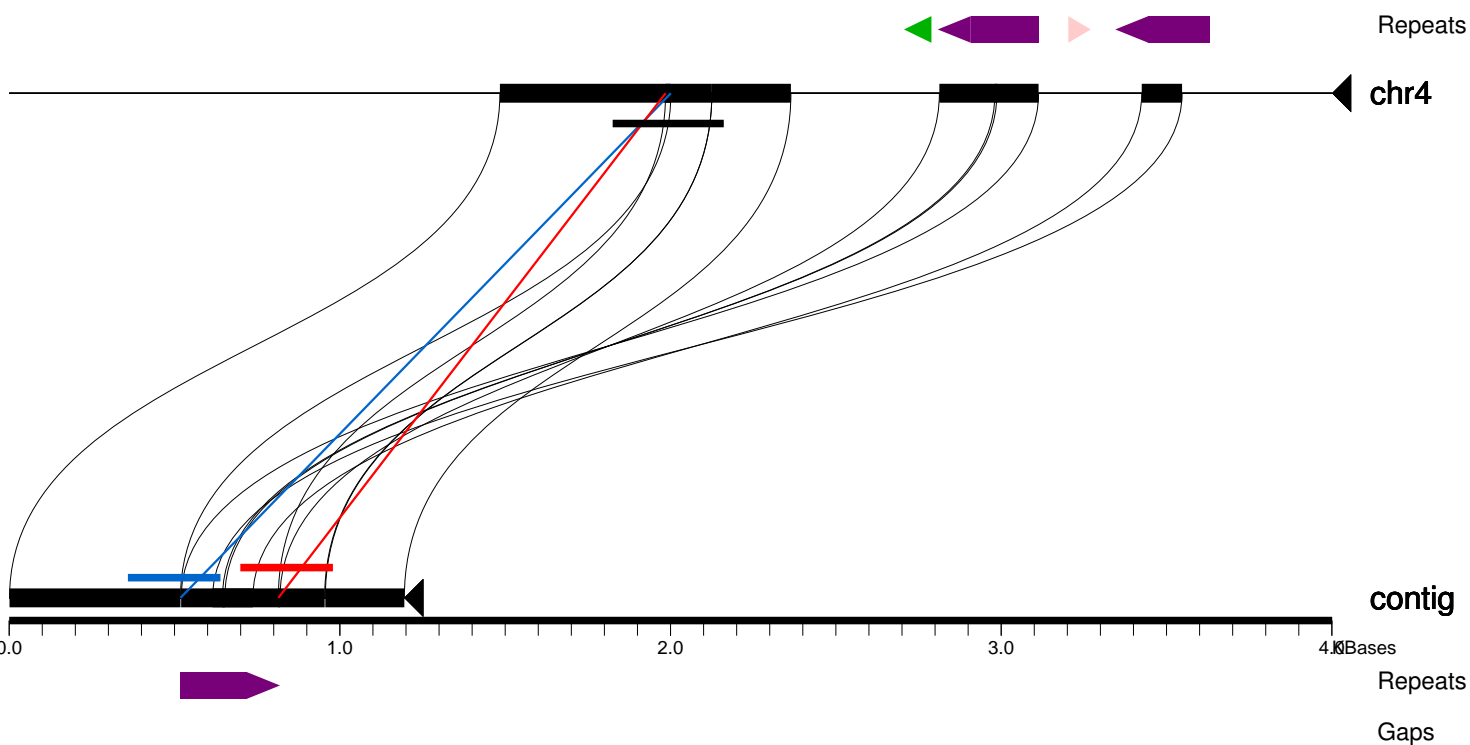





siteID: chr4\_55993087 Scaffitg2 - Breakpoint: chr4:55993107

chr4:55992947-55993247

Overlap Length: 14 INS size: 419 Genotyped: No

```

left -----
chrom TGTATTCACGCTTTTACTTTTCCAAGTTGACAGGTGAAAATATTTTAA-TGCTGAAATATAATGAATGTAT
right AATTTT-----TTGTATTTTT---AGTAGAGACGGG-----TTTACCTTGTAGCCAGGATGG-TCTCG
NN2N22      22N22N2222      222N22N2N2N2N      222N2N12NN2N2NNN2NN222N 2N2NN

left -----GACTTTTCTTTTGGCAGAGGCA
chrom ATGGCAAAAAAAAAATTTTGGAAAAACACAAAAGGCTTAGAGTGAAAAAGACTTTTCTTTTGGCAGAGGCA
right ATCTCCTGACCTCAT----GATCCACCCGCCTCGGCCTCCC---AAAGTGCTGGGATT-----ACAGGC-
22NN2NNN2NNNN22      22NNN22N2NNNNN222N2NNN      222N11**1111**11111*1***1

left TTTTTATGTTTCCTTTTTCCTTTTCCAAGCAGATTCTTTNNNNNNNNNNNNNNNNNNNNNNNNNNNNNN
chrom TTTTTATGTTTCCTTTTTCCTTTTCCAAGCAGATTCTTT-----AAACACAAGTATGTAGACATGTCACCC
right -----GTGAGC-----CCAAGCAGATTCTT-----AAACACAAGTATGTAGACATGTCACCC
11111111**1111*111111111*******111122222222222222222222222222222222222

left NNNNNNNNNNNNNNNNNNNNNNNNNNNNNNNNNNNNNNNNNNNNNNNNNNNNNNNNNNNNNNNNTTT
chrom TTCTCTTCCCACAATTGCTTGGTATAAAATGCTATTTGAGCCTTGGCTTTTTTCCCTTTAAATTTGATTTA
right TTCTCTTCCCACAATTGCTTGGTATAAAATGCTATTTGAGCCTTGGCTTTTTTCCCTTTAAATTTGATTTA
222222222222222222222222222222222222222222222222222222222222222222**2

left TTTTTTCCAAGCAAATTTTTTTTTTTTTTTTTTTTTTTT-----
chrom TTTATTTGAGACAAGGTCTCACTATGTTGC-----
right TTTATTTGAGACAAGGTCTCACTATGTTGCCAGGCTGGTCTCCAATGCC
***2**22*22**22*2*222*2*2**22NNNNNNNN1111111111
    
```

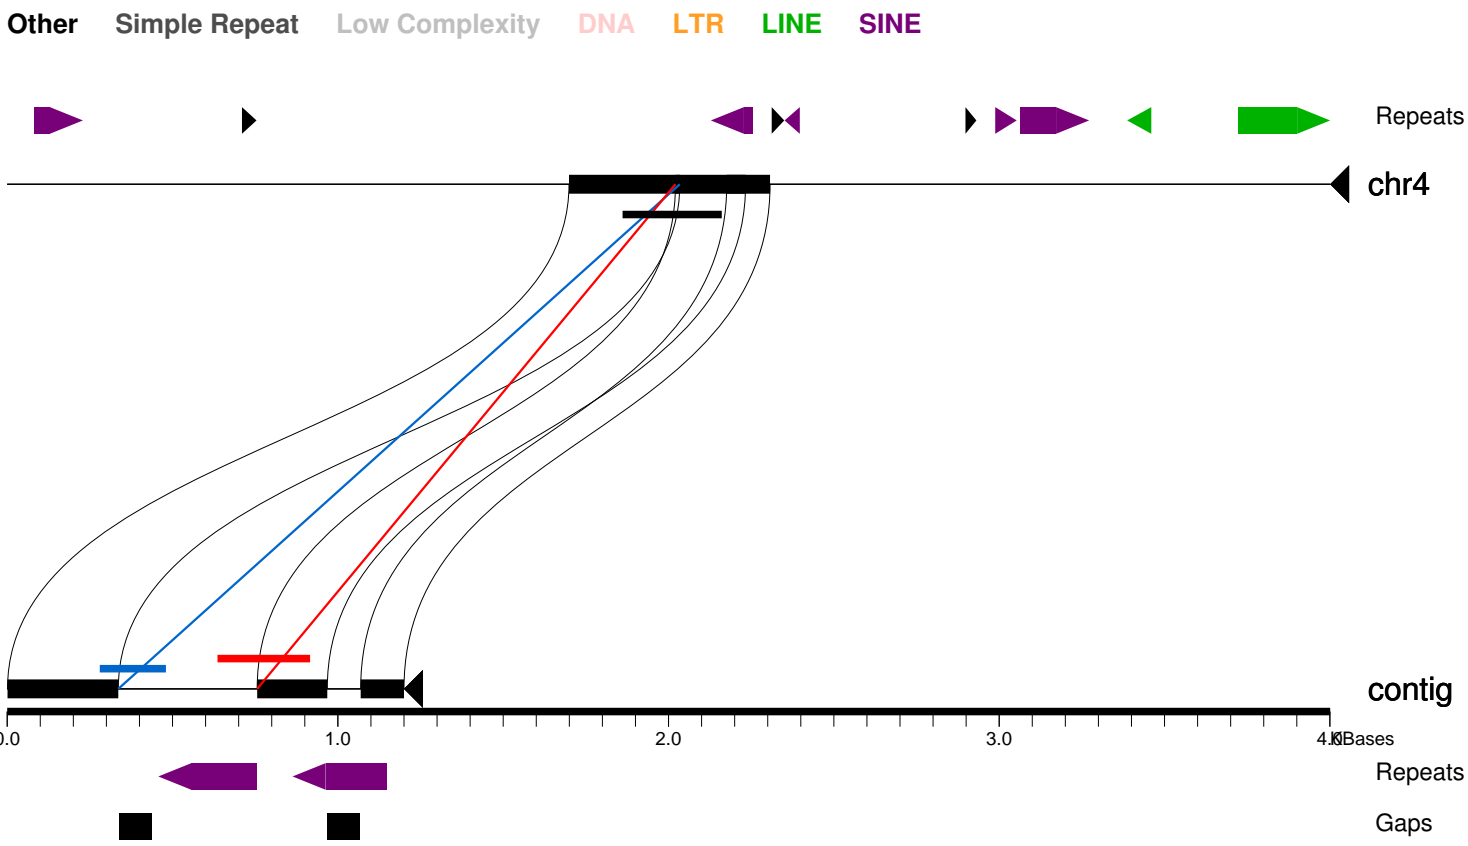

siteID: chr4\_56453145 Scaffitig1 + Breakpoint: chr4:56453095

chr4:56453090-56453130

Overlap Length: 36 INS size: 471 Genotyped: No

```
left -----
chrom -----
right NNNNNNNNNNNNNNNNNNNNNNNNNNNNNNNNNNNNNNNNNNNNNNNNNNNNNNNNNNNNNNNNNNNNNNNNNNNNNCTTCATTATTA
      1111111111111111111111111111111111111111111111111111111111111111111111111111111111111111111
```

```
left -----AAGCATCTTTTCATGTGTTTATTGGCTATTTGGAGATCTTCTTTTAAAGAAACGTCTATTTCGG
chrom -----AAGCATCTTTTCATGTGTTTATTGGCTATTTGGAGATCTTCTTTTAAAGAAACGTCTATTTCGG
right GTGATGTTAAGTCTTTTCATGTGTTTATTGGCTATTTGGAGATCTTCTTTTAAAGAAACGTCTATTTCGG
      111111111**11*****1*****2222222222222222222222222222222222222222222222222
```

```
left CCGGGCGCGGTGGCTCACGCCTGTAATCCAGCACTTTGGGAGGCCGAGGCGGGCGG
chrom -----
right 222222222222222222222222222222222222222222222222222222222222222222222222222222222
```

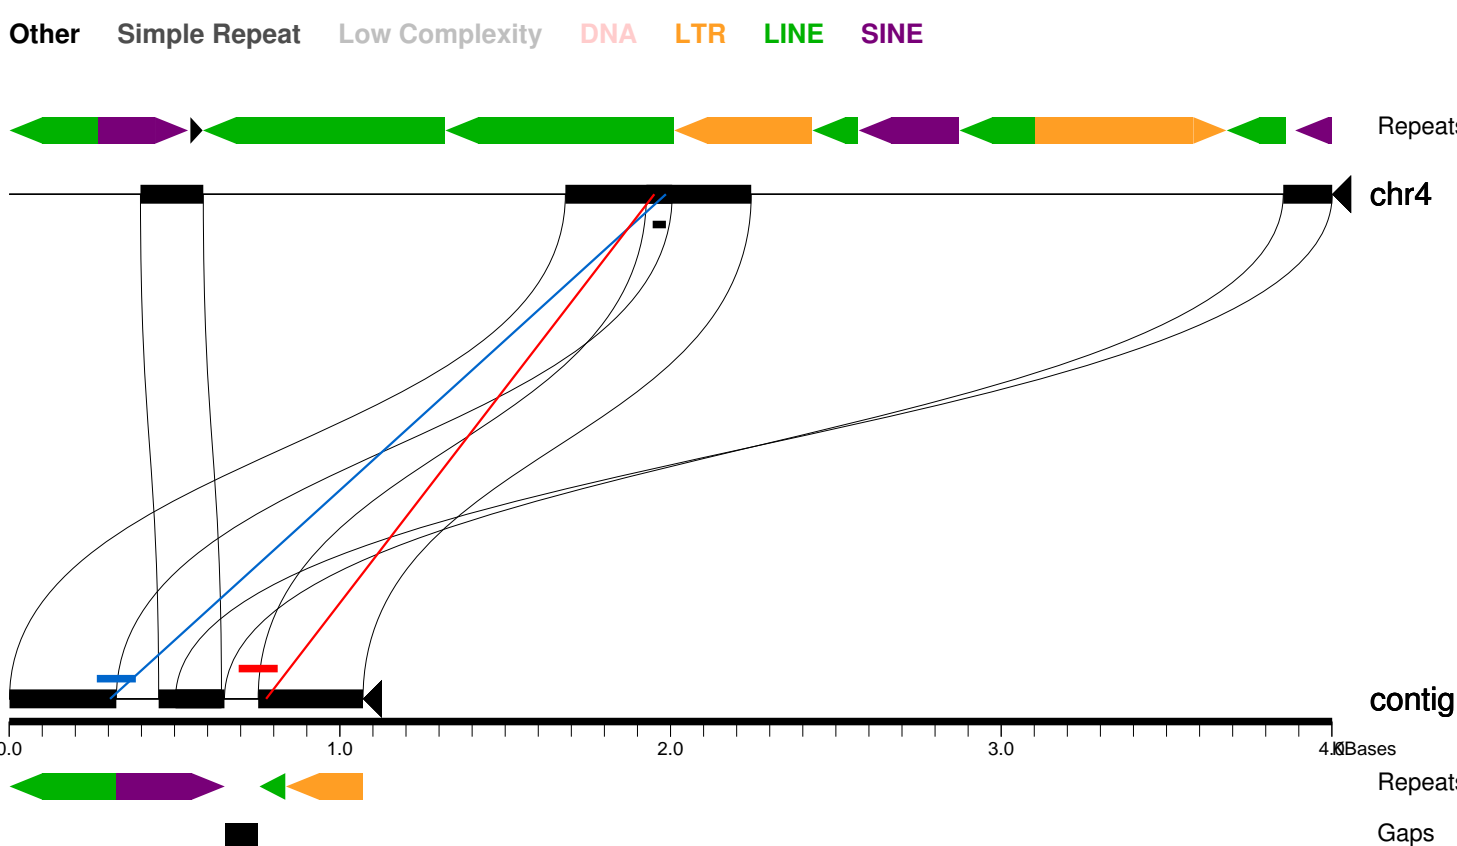

**siteID: chr4\_57258152 Scafftig2 + Breakpoint: chr4:57258156**  
**chr4:57258137-57258230**  
**Overlap Length: 41 INS size: 410 Genotyped: No**

left TGCAAATT-----TGACA-----AGAAAC-----AGGTATAAAAGTTCTTAAAAAAAAAAAA  
chrom TGCAAATT-----TGACA-----AGAAAC-----AGGTATAAAAGTTCTTAAAAAAAAAAAA  
right C-CAAAGTGCTGGGATTACAGGCCGTGAGCCACCGCGCCCGGCCAGGTATAAAAGTTCTTAAAAAAAAAAAA  
11\*\*\*\*1\*1111111\*1\*\*\*111111\*\*11\*\*111111111111\*\*\*\*\*

left A--AGAAAATACAAAANNNNNNNNNNNNNNNNNNNNNNNNNNNNNNNNNNNNNNNNNNNNNNNNNNNNNNNN  
chrom A--AGAAAATACAAAATAACAATCTCAGCATAATAGTTTTTCAGCCGTGAA-----  
right AAAAGAAAATACAAAGTAACAATCTCAGCATAATAGTTTTTCAGCCGTGAA-----  
\*11\*\*\*\*\*222222222222222222222222222222222222222222222222222222222222

left NNNNN  
chrom -----  
right -----  
22222

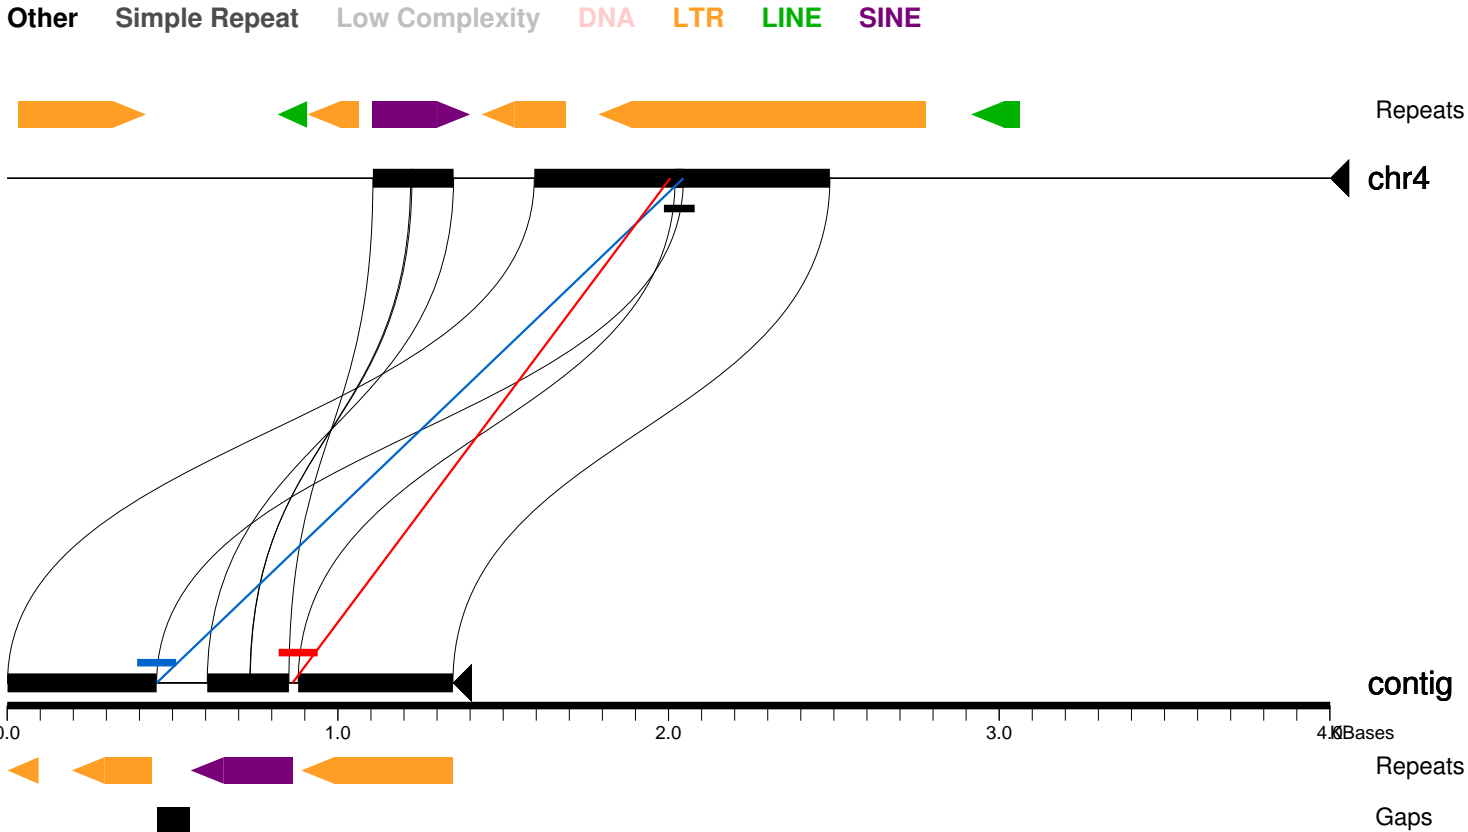

siteID: chr4\_58976421 Scaffitig5 - Breakpoint: chr4:58976320

chr4:58976160-58976490

Overlap Length: 11 INS size: 99 Genotyped: Yes

```

left -----TCAGATATATCCACACAAATATAATTTTAGTTTATATTTCTGTTACTGCAGTTCTCATCTT
chrom CAATGGCAATCAGATATATCCACACAAATATAATTTTAGTTTATATTTTGTFACTGCAGTTCTCATCTT
right CAAATACT-TCATATGTATC-----TTTTTTTTTTTTTTTTTTTTTTTTTTTTTTTTTTTTTTTTTTTT
222NNN2N ***1**1***11111111*1*11***11***1*1***2*1**11111111*1*11*1**
  
```

```

left ATTCTGAGGATACGTGACAAAATAATTCCTTCAAAAATATTG--ATGCTGTGCTAGATTACTATTTTGAA
chrom ATTCTGAGGATACGTGACAAAATAATTCCTTCAAAAATATTG--ATGCTGTGCCAGATTACTATTTTGAA
right TTTTGTGAG---ACGG---AGTCTCGCTCTGTGCGCCAGGCTGGAGTGCAGTGGCGGGAT-CTCGGCTCAC
1**1***111***1111*111*111***1**1111*111**111***1***121*11*1**1111*1*1
  
```

```

left TGAATTACTAGACAAATACTTTCATATGTATCTTTTTTTTTTTTTTTT-----TTTTTTTTTTTTTTTTTT
chrom TGAATTATTAGACAAATACTTTCATATGTATCTTTATTATGTGGGTTTACACATTATTTATCTTATTGATTT
right TGCA-----AATATGTATCTTATTATGTGGGTTTACACATTATTTATCTTATTGATTT
**1*111N1111111111111111111*2**2*2*222**22222*2***2*2**2*22**
  
```

```

left TTTTGTGAGACGGA-----GTCTCGCTCTGTGCGCCAGGCTGG---AGTG-----
chrom AACTTCAAAAATAAACTTTAGTTTAGCTCTTGGGCCCTATCTGGGAAAAGGGTTCATCTTTTAAATCACCATT
right AACTTCAAAAATAAACTTTAGTTTAGCTCTTGGGCCCTATCTGG--AAAGGGTTCATCTTTTAAATCACCATT
222**2*2*222*2222222**2*2*****222*****222***** 22**2*2222222222222222222
  
```

```

left ----CAGTGGCGGGATC--TCGGCTCACTGCAATATGTATCTTATTATG-TGG
chrom AAATCACTGAAGTCATCAGTTTATTCAAAAGTACTCTGCACAAAATTAGCATT
right AAATCACTGAAGTCATCAGTTTATTCAAAAGTACTCTGCACAAAAT-----
2222**2*22*22**22*2222**22*2*2*2*2*22221111NN 1NN
  
```

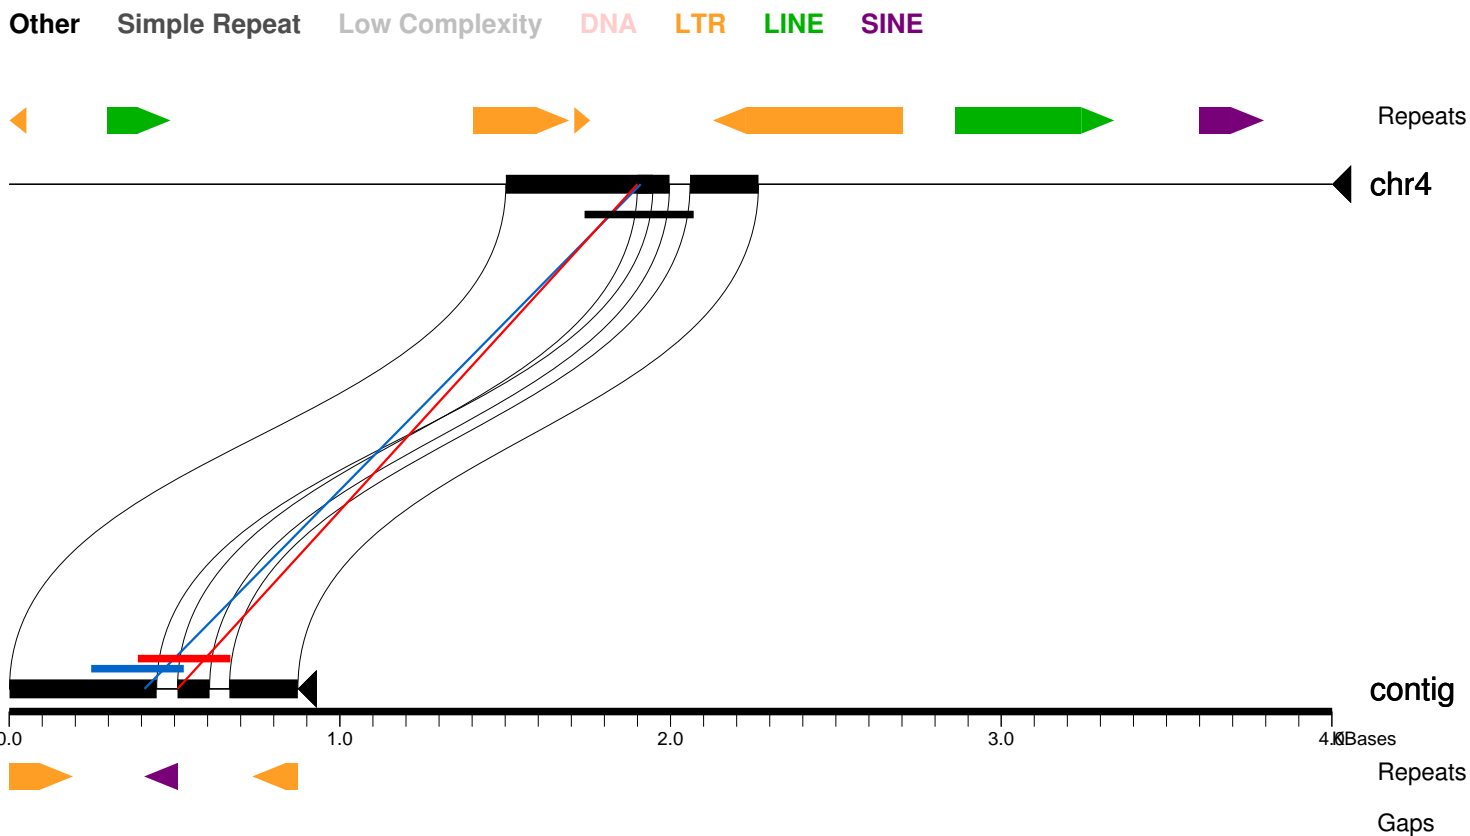

siteID: chr4\_61056013 Scaffitig7 + Breakpoint: chr4:61055987

chr4:61055940-61056046

Overlap Length: 13 INS size: 295 Genotyped: Yes

```
left  TGTCAAAAAACTGATGTGACAGACTCCT----TTCCAGTCATT-----CTGTGA---GGCCAGTATCATC
chrom TGTCAAAAAACTGATGTGACAGACTCCT----TTCCAGTCATT-----CTGTGA---GGCCAGTATCATC
right TCCGCCCCGCCTCGGCCTCCCAAAGTGCTGGGATTACAGGCCGTGAGCCACCGCGCCCGGCCCAGTATCATC
      *111111111111*111*11**1*1*1**1111**1***1*1*1111111*1*1*1111*1*1*****

left  TTTTTTTTTTTTTTTTTGAGACGGAGTCTCGCTCTGTCGCCAGGCTGGAGTGCAGTGGCGG
chrom TTTGATACCAAACTTTGGAA---GAGATAGAAAAGAAAACTCCACGCCAA----CATT-----
right TTGATACCAAACTTTGGAA---GAGATAGAAAAGAAAACTCCACGCCAA----CATT-----
      **22*22222222**2**2222***222222222222222222222***2**2222222**2*22222
```

Other   Simple Repeat   Low Complexity   DNA   LTR   LINE   SINE

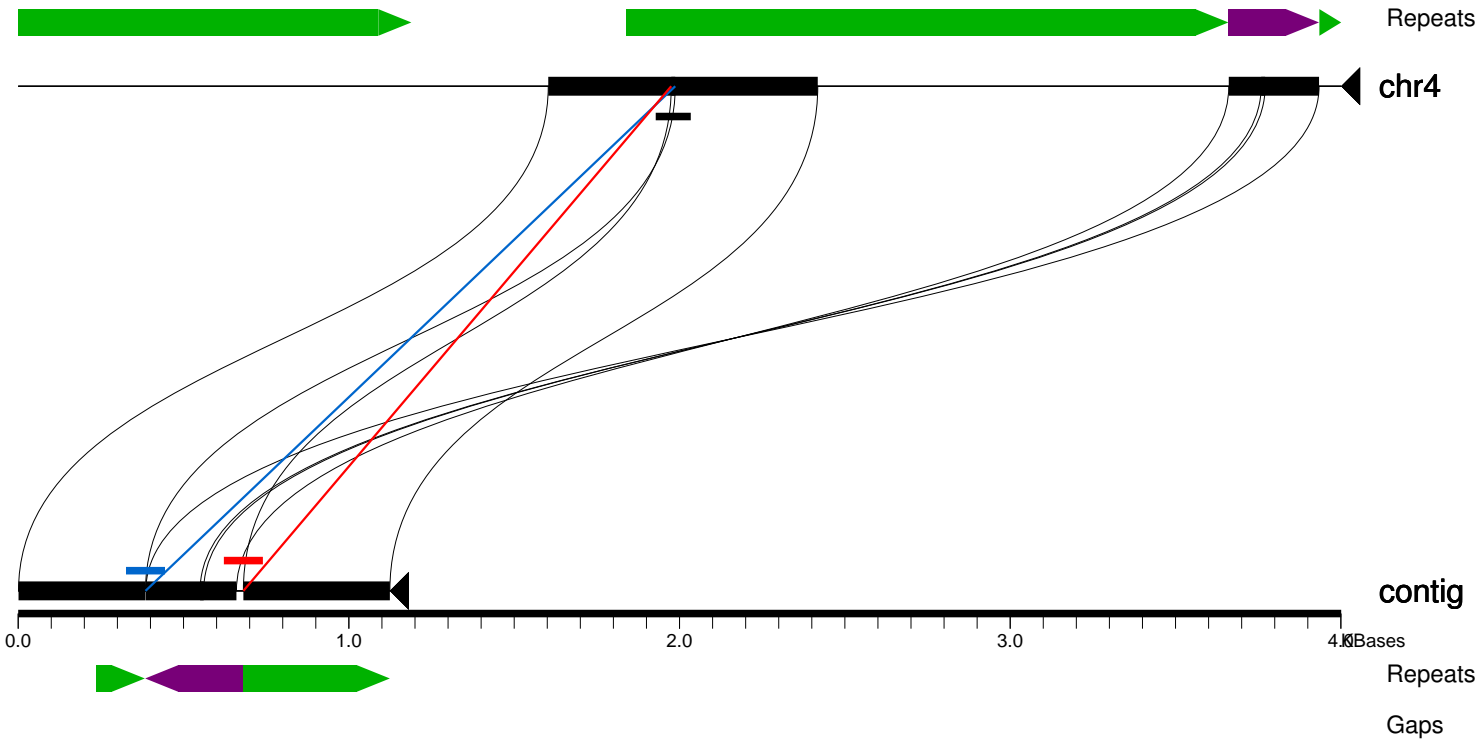

siteID: chr4\_61825116 Scaffitig10 - Breakpoint: chr4:61825096

chr4:61825050-61825142

Overlap Length: 14 INS size: 314 Genotyped: Yes

```
left  CAGTGGT--GCAATG-----GACAGCACG----TCTGACT-----ATGGAACAGAAGATT
chrom CAGTGGT--GCAATG-----GACAGCACG----TCTGACT-----ATGGAACAGAAGATT
right CTGCAGTCCGCAGTCCGGCCTGGGCGACAGAGCGAGACTCCGTCTCAAAAAAAAAAAAAAAAAAAAAA
*1*11*11**1*111111111111*****11*1111*1*1*1111111111*111*1*1*1*11
```

```
left  ATAAAAATTTATATATCGGCCGGGCGCGGTGGCTCACGCCGTGTAATCCCAGCACT-TTGGGAGGCCGAGGC
chrom ATAAAAATTTATATATCTACCCA-----TATCA-----TATTATTAGTAATATTGTTATA-----
right AAAAATTTATATATCTACCCA-----TATCA-----TATTATTAGTAATATTGTTATA-----
*1*****22*222222222222***222222**2*222**2*2*2***22*222222222
```

```
left  GGGTGG
chrom -----
right -----
      222222
```

Other Simple Repeat Low Complexity DNA LTR LINE SINE

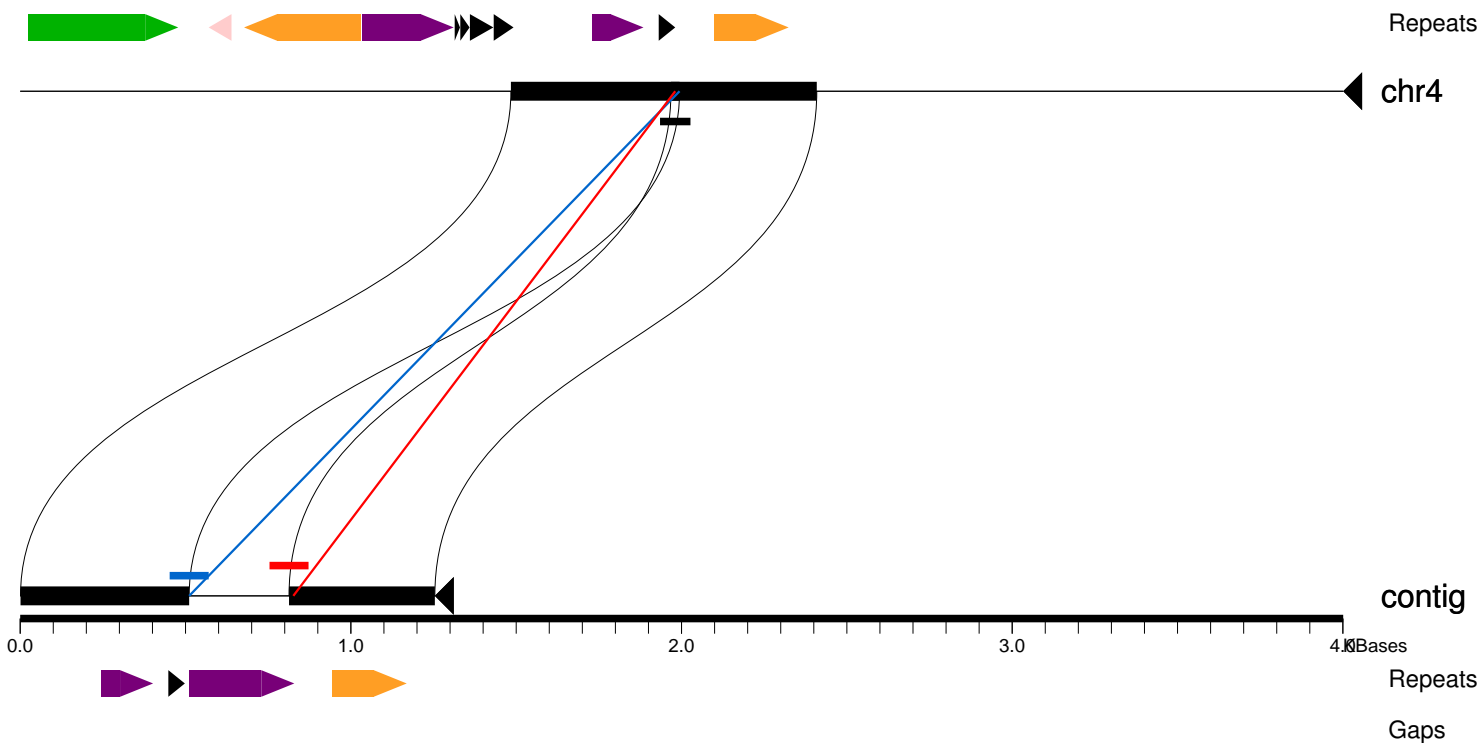



siteID: chr4\_65518356 Scafftig2 - Breakpoint: chr4:65518361

chr4:65518319-65518420

Overlap Length: 5 INS size: 301 Genotyped: Yes

```
left  CTG-----TTTGAAAAC--TTCTTTTTCAAGTCT---CCACTCCTTCCTTT-TTGTTTTTTTT
chrom CTG-----TTTGAAAAC--TTCTTTTTCAAGTCT---CCACTCCTTCCTTT-TTGTGTTGTT
right CCGCCCGCCTCGGCCTCCCAAAGTGTGGATTACAGGCGTGAGCCACCGCGCCCGGCCTTGTTGTTGTT
      *1*111111111111111*111***1*11*1111*1**1*11*111****11*11*1111*2**2**
```

  

```
left  TTTTTTTTTTTTTTTGAGACGGAGTCTCGCTCTGTGCGCCAGGCTGGAGTGCAGTGGCGGGATCTCG
chrom AGTTTTTA-----AAATATTGTATC-CACAATCAAATCCA-----ACTCCTGTA-----AAAATT
right AGTTTTTA-----AAATATTGTATC-CACAATCAAATCCA-----ACTCCTGTA-----AAAATT
      22*****22222222*2*22*22**2*2*22*22222***222222*2*2*2**222222*22222
```

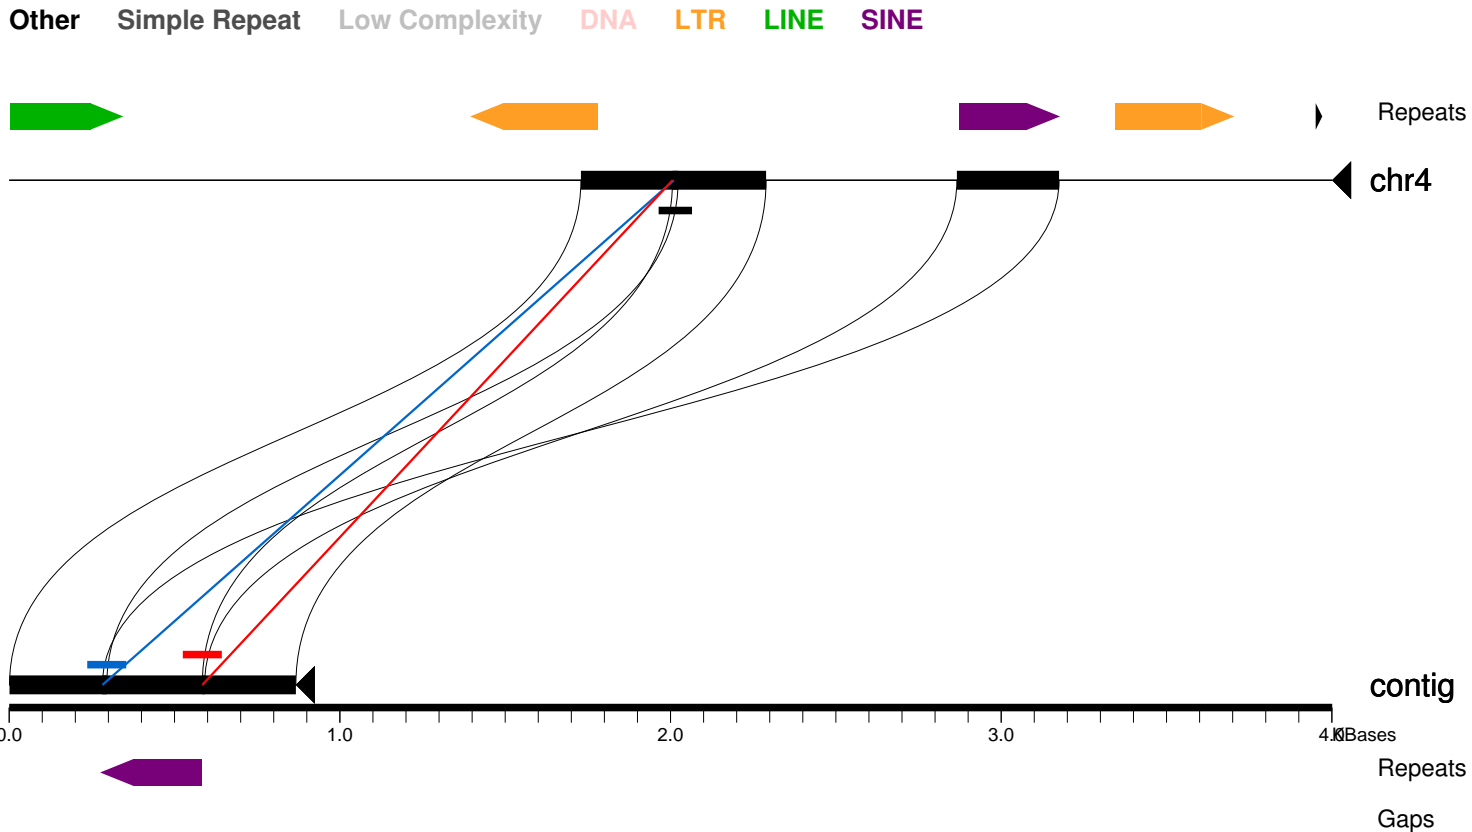



siteID: chr4\_67106625 Scaffitig14 - Breakpoint: chr4:67106599

chr4:67106557-67106701

Overlap Length: 18 INS size: 300 Genotyped: Yes

left GATACGTCTTTGTAGGAAAAAGACACTTGCAGAAATTTCAAGTTAGAAAAGATTAAGATTTGC  
chrom GATACGTCTTTGTAGGAAAAAGACACTTGCAGAAATTTCAAGTTAGAAAAGATTAAGATTTGC  
right AAAA-----AAAAAAAAAAAA-----AGAAAAGATTAAGATTTGCTCAGGTGTCC  
1\*1\*1111111111\*11\*\*\*\*1\*1\*11111111111111111\*\*\*\*\*\*2222\*2\*22\*

left GGTGGCTCACGCCTGTAA-----TCCC-----AGCACTTTGGGAGGCCGAGG--C  
chrom TTTATGTGTGGGCTGAAAAAAAAAAAAA-GTTATTATCCTGAAAAGAATAACACGGTATGAGGGAGTTCACC  
right TTTATGTGTGGGCTGAAAAAAAAAAAAAAGTTATTATCCTGAAAAGAATAACACGGTATGAGGGAGTTCACC  
22\*222\*222\*2\*\*\*2\*\*2222222212222222\*\*\*222222222\*2\*\*\*22\*22\*\*\*\*22\*22222\*

left GGGCGG  
chrom TTACAT  
right TTACAT  
222\*22

Other Simple Repeat Low Complexity DNA LTR LINE SINE

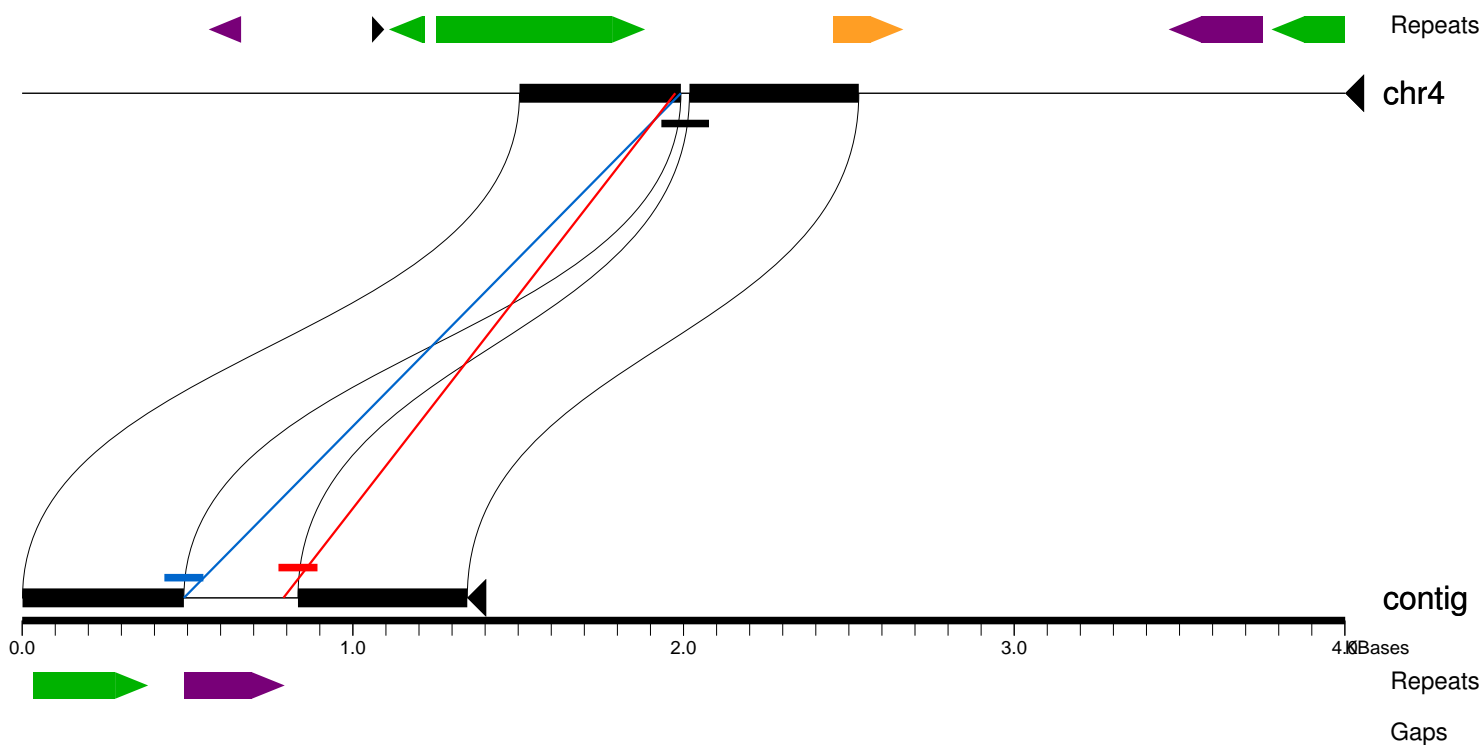

siteID: chr4\_67754004 Scaffitg2 - Breakpoint: chr4:67753999  
chr4:67753839-67754170  
Overlap Length: 12 INS size: 216 Genotyped: No

```
left      -----ATGCTGTTTCCTACTTTCATTTGATGATGCTTAGCATTGGTTTTCAGTTGAGATTCCCTTCT
chrom    GGCCCCAAAATGCTGTTTCCTACTTTCATTTGATGATGCTTAGCATTGGTTTTCAGTTGAGATTCCCTTCT
right    GCTCACTGCAAGCT-----CCGCTTCCCGGGTTCACGC----CATTCTCCTGCC---TCAGCCTCCCGAG
          2NN2N2NNN*1***11111*11***1111*1*1*1**1111***1111*11*111*1**11***1111

left      AAGTTCATACCTTCAGCATCAAAACTAATACTTTTATTCCAGCAAGTAGACAGATAAAATATGTTACACCTA
chrom    AAGTTCATACCTTCAGCATCAAAACTAATACTTTTATTCCAGCAAGTAGACAGATAAAATATGTTACACCTA
right    TAGCTGGGAC-TACAGGCGC-----CCGCCACCGCGCCCGGCTAATTTTTTTG---TA
          1**1*111**1*1***111*1111111111111111111**11*1111*1*1*111***1*1**1111**

left      AGTATAGCTGGCTCTATATAAATAGACTCTTTTTTTTTT-----TTTTT
chrom    AGTATAGCTGGCTCTATATAAATAGACTCTTTATATATATATGACCCTATAACCTAAACACCCTCTTAGT
right    TTTTTAGTAGAGACGA---AATAGACTCTTTATATATATATGACCCTATAACCTAAACACCCTCTTAGT
          11*1***11*111*1*1111******2*2*2*2*22222222222222222222222222222222**22*

left      TTTTTTTTTTTTTTTTTTTTTTTTGA-----GACGGAGTCTCGCTCTGTCGCCAGGTCGGACTG
chrom    ATTAATAGTTATCTTTCTTTGTGATTTCTCCTCTTTGAGGATTTCTTGCTTTG-CTTTTTGGTGCCCCAG
right    ATTAATAGTTATCTTTCTTTGTGATTTCTCNNNNNNNNNNNNNNNNNNNNNNNNNNNNNNNNNNNNNNNNN
          2**22*22**2*2***2***2***222222NNNNNNN11N1NNN111N11N1121NNNNN111NNNNN1N1

left      CGGACTGCAGTGGCGCAATCTCGC-----TCACTGCAAGCTCCGCTTCCC
chrom    AAGACTCCCTTGGGATTTTCTCTCAGTAAATAATTATGCAAAATTTCTCTGAC--
right    NNNNNNNNNNNNNNNNNNNNNNNNNNNNNNNNNNNNNNNNNNNNNNNNNNNNNNNNNNNNNNNNNNNNN
          NN1111N1NN111NNNNN1111NNNNNNNNNNN1N1NNN111NN1N1N11NN122
```

Other Simple Repeat Low Complexity DNA LTR LINE SINE

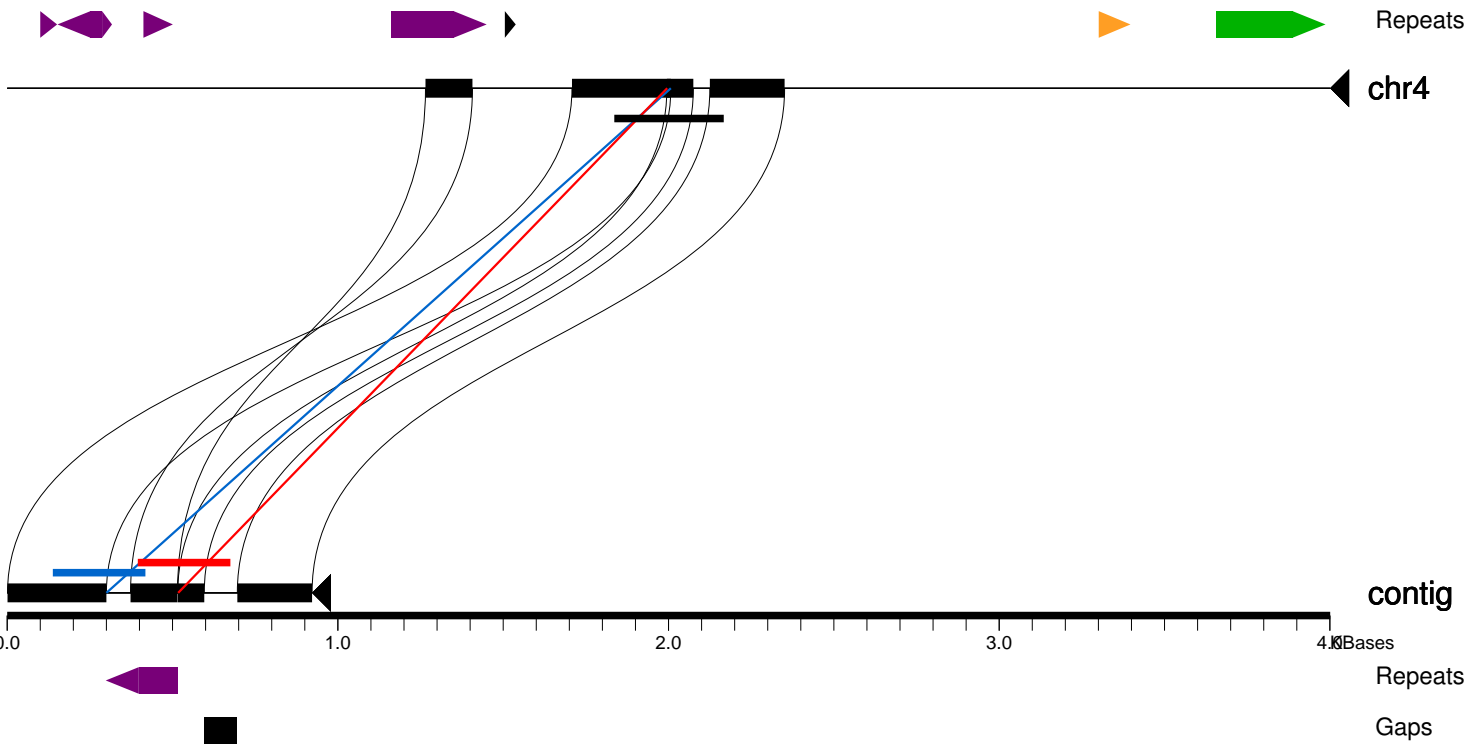

siteID: chr4\_67963825 Scaffitg4 - Breakpoint: chr4:67963880  
chr4:67963720-67964052  
Overlap Length: 13 INS size: 313 Genotyped: Yes

```
left  -----CAGAGCCCTCAGAAATAATGCCGCATATCTACAACCTATCTGATCTTCGACAAAACCTGACAA
chrom GGAACAGAACAGAGCCCTCAGAAATAATGCCGCATATCTACAACCTATCTGATCTTCGACAAAACCTGAGAA
right CG-----GCT-----AATTTTTT--GTATTTTTTAGTAGAGACGGGGTTTC-----ACC-GTGT
N2      1111**111111**1*11*111*1**1*1**11*1111*1*111***11111***1*1211
```

```
left  AAACAAGCAATGGGGAAAAGGATTCCCTATTTTCAT-AAATGGTGCTGGGAAAACCTGGCTAGCCATATGTAG
chrom AAACAAGCAATGGGGAAAAGGATTCCCTATTTTCAT-AAATGGTGCTGGGAAAACCTGGCTAGCCATATGTAG
right AGCCAGG--ATGG-----TCTCGATCTCCTGACCTCGTGATCCGC---CCGCCTCGGCCTCCCAA-
*11**1*11****1111111111**1*1**1*1*1*11*1**1*11*1111*1*1**1*1*1*1111*1
```

```
left  AAAGCTGAAACTGGATCCCTTCCTTACAACCTTTT*****
chrom AAAGCTGAAACTGGATCCCTTCTTACAACCTTTTACAAAAATTAATTCGAGATGGATTAAAGACTTACAT
right AGTGCTGGGATTACAGGCGT-CCTTACAACCTTTTACAAAAATTAATTCGAGATGGATTAAAGACTTACAT
*11****11*1*11*11*1*1*1*****2222222*22*22222*222*222222*222*
```

```
left  TTTTTTTTTTTTG--AGACGGAGTCTCGCTGTGCGCC--AGGC-----TGGAGTGCAGTGGC----GCA
chrom GTTAGACCTAAAAACCATAAAAACCTTAGAAGAAAAACCTAGGCAATACCATTTCAGGTCATAGGCATGGGCA
right GTTAGACCTAAAAACCATAAAAACCTTAGAAGAAAAACCTAGGCAATACCATTTCAGGTCATAGGCATGGGCA
2**22222*222222*2*222*22**2*22*2222**2*****2222222*22**22**22***2222***
```

```
left  A-----TCTCGGCTCA-----CTGCTGCA--GGCTCC-----
chrom AGGACTTCATGTCTAAAAACACCAAAAAGCAATGGCAACAAAAAGACAAAATTGACA
right AGGACTTCATGTCTAAAAACACCAAAAAGCAATGGCAACAAAA-----
*22222*22*2*2*22222*2222***22***22*2222
```

Other    Simple Repeat    Low Complexity    DNA    LTR    LINE    SINE

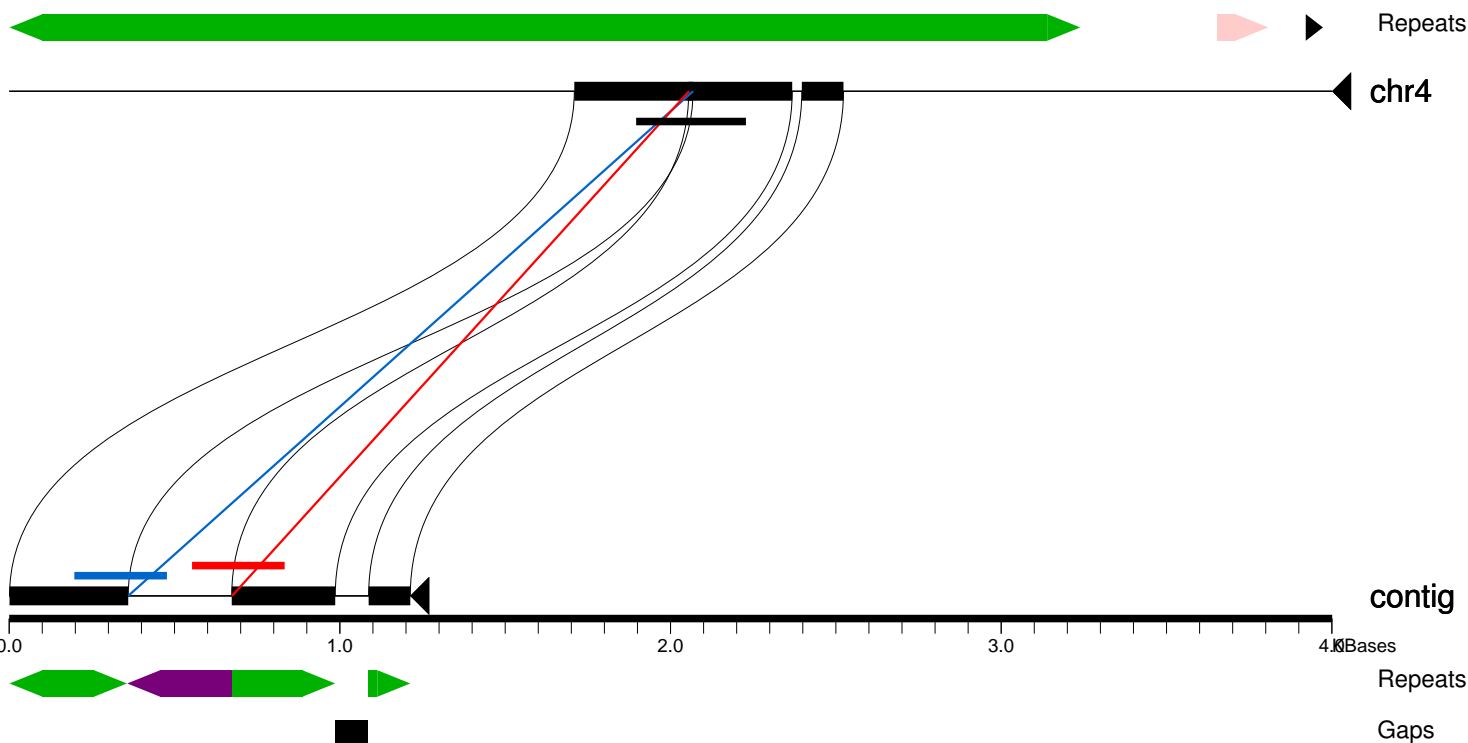



siteID: chr4\_70096920 Scaffitg1 + Breakpoint: chr4:70096928

chr4:70096768-70097101

Overlap Length: 14 INS size: 305 Genotyped: Yes

left -----TTTCTTAGTGATGGTACTGAATTCA-ATAGAATTTTAAATGTGCATCAATTCTG--  
 chrom AGATATCATGACTATTTCTTAGTGATGGTACTGAATTCA-ATAGAATTTTAAATGTGCATCAATTCTG--  
 right CGTGAACCCGGGAAGCG----GAGCTTGCAGTGAGCCGAGATTGCGCCACTGCAGTCCG-CAGTTCAGCC  
 N2NN2N2NN2NNN211111111\*1\*1\*1\*1\*1\*\*\*1111\*1\*\*1\*1111111111\*\*1\*11\*\*1\*\*\*1\*11

left TGAGCTGACATAGAG-GAATCATGATTAAGTAAATCAAAAATAGTATTAATGCTCAATGATATGTGGTAGA  
 chrom TGAGCTGACATAGAG-GAATCATGATTAAGTAAATCAAAAATAGTATTAATGCTCAATGATATGTGGTAGA  
 right TGGG-TGACAGGGCGAGACTCCGTCTCAAAAAAAAAAAAAAAAAAAAAAAAAAA-----AA-----AAA  
 \*\*1\*1\*\*\*\*\*11\*1\*1\*\*1\*\*11111\*1\*\*11\*\*\*11\*\*\*1\*11\*11\*\*11111\*\*111111111111\*1\*

left GAGAAACATTTAGTTTAAAGTTAGAAATCAGGCATTC-----CTGTAATCCCAGCACTTTGGGAGGCCGA  
 chrom GAGAAACATTTAGTTTAAAGTTAGAAATCAGGCATTC-----CTGTAATCCCAGCACTTTGGGAGGCCGA  
 right AAAAAAAAA-----AA-----AAAAATCAGGCATTCAAAAAAAAACAGGAATCACAGCAATAACAAACGAACA  
 1\*1\*\*\*1\*1111111111\*\*1111\*1\*\*\*\*\*2222\*2\*2\*\*\*2\*\*\*2\*2222\*2\*222\*

left GCGGGTGGATCATG-----AGGT---CAGGAGATCGA-----GACCATCCTGGCTAACAAAGGT  
 chrom TAACTCTGAACTATGCACACCAGATAAAACATGAAATTTATTTTGCAAATGTTTTTGCAAGTTTAGTCCTTT  
 right TAACTCTGAACTATGCACACCAGATAAAACATGAAATTTATTTTGCAAATGTTTTTGCAAGTTTAGTCCTTT  
 222222\*\*2\*22\*\*\*222222\*\*2\*222\*\*2\*\*2\*\*22\*222222222\*2222\*2\*2\*22\*\*222222\*

left GAAACCCGTCTCTACTA--AAAATA-----CAAAA-----AATTAGCCGGGCG  
 chrom GCATCAGCTTATATTTGTGGGAAAAGTAAGGGATCAAGAGCAGCTGAAATGATATAGCAT  
 right GCATCAGCTTATATTTGTGGGAAAAGTAAGGGATCAA-----  
 \*2\*2\*22\*2\*2\*2\*22\*222\*\*\*2\*\*222222\*\*\*N1 111N1NNNN1NNN

Other Simple Repeat Low Complexity DNA LTR LINE SINE

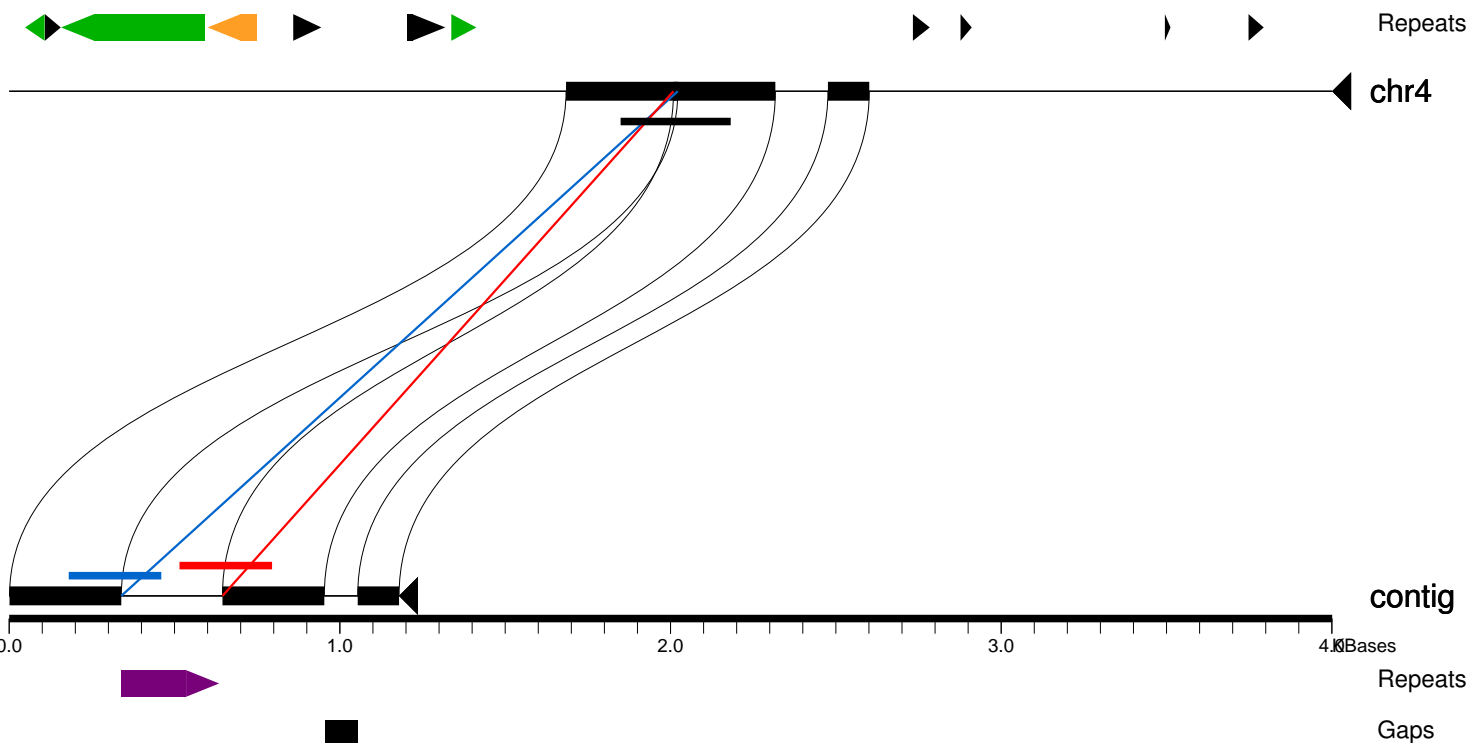

siteID: chr4\_70413674 Scaffoldig5 + Breakpoint: chr4:70413663

chr4:70413614-70413722

Overlap Length: 11 INS size: 445 Genotyped: No

```

left  GAAATTATTTAAGGCAATCTCAATGAGCTAAGAA-----TAGTAAAAATTAATTAAAAACAATTAG
chrom GAAATTATTTAAGGCAATCTCAATGAGCTAAGAA-----TAGTAAAAATTAATTAAAAACAATTAG
right NNNNNNNNNNNNNNNNNNNNNNNNNNNNNNNNNNNNNNNNNNNNNNNNNNNNNNNNNNNNNNNNNNNNNNN
11111111111111111111111111111111111111111111111111111111111111111111
*11**11***1*****

left  GGCCGGGCGCGGTGGCTCACGCCTGTAATCCACAGCACTTTGGGAGGCCGAGGCGGGTGG
chrom A-CAAAAAATAATACAGAATGAGGATAGTCAAAAATATTTTAACAT----AGG----GA
right A-CAAAAAATAATACAGAATGAGGATAGTCAAAAATATTTTAACAT----AGG----GA
22*222222222*22222*2*2222**2**22*22*2***222*22222***22222*2
  
```

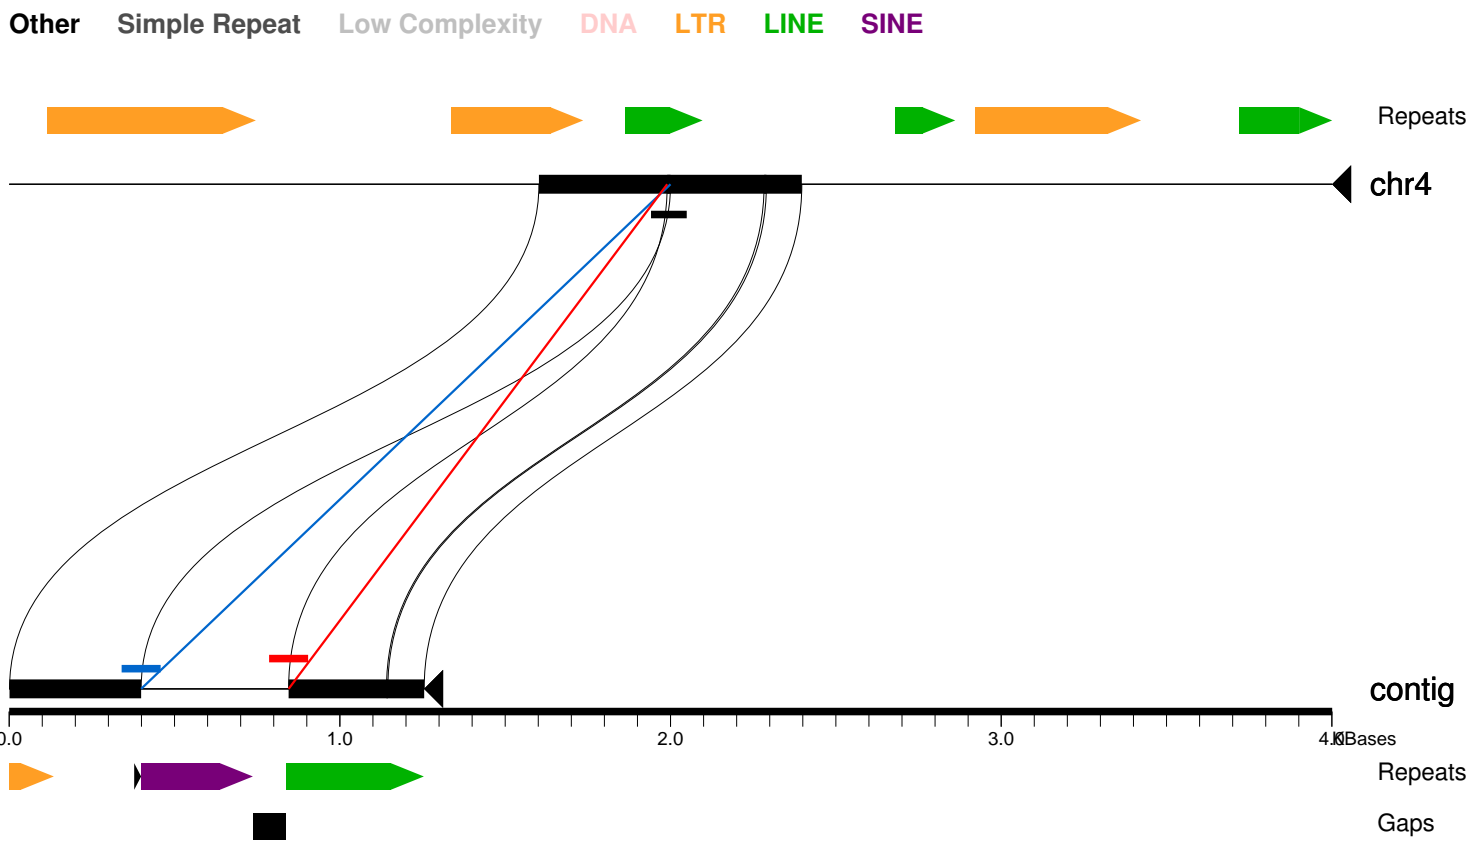

siteID: chr4\_72714689 Scafftig2 + Breakpoint: chr4:72714689

chr4:72714643-72714748

Overlap Length: 14 INS size: 330 Genotyped: Yes

```
left  -----CTTTAAAATCTACAACCTGACCCTTGAATAATATGGGTGTGA-ACTGT-----GCAGGTCT
chrom -----CTTTAAAATCTACAACCTGACCCTTGAATAATATGGGTGTGA-ACTGT-----GCAGGTCT
right  GCCCGCCTCGGCCTCCCAAAGTG---CTGGGATTACAGGCGTGAGCCACCGCGCCCGGCCACGCAGGTCT
      111111*1*111111**111**1**111**1*1**1*1*1*1**1*11**1*111111111111*****
```

```
left  ACTTCTTTTTTTTTTTTTTTTTTTTTTTTTTTTTTTTTTTTTTTTTTTTTTTTTTTTTTGGAGACGGAGTCT
chrom ACTTCTAAGCAGACATTTTCCAATAAATAACAATTGGCCCTCAGT-----GTCCACAC-----
right ACTTCTAAGCAGACATTTTCCAATAAATAACAATTGGCCCTCAGT-----GTCCACAC-----
      *****222222222*****2222*222*2222**22222*222*2222222*22*2**2222222
```

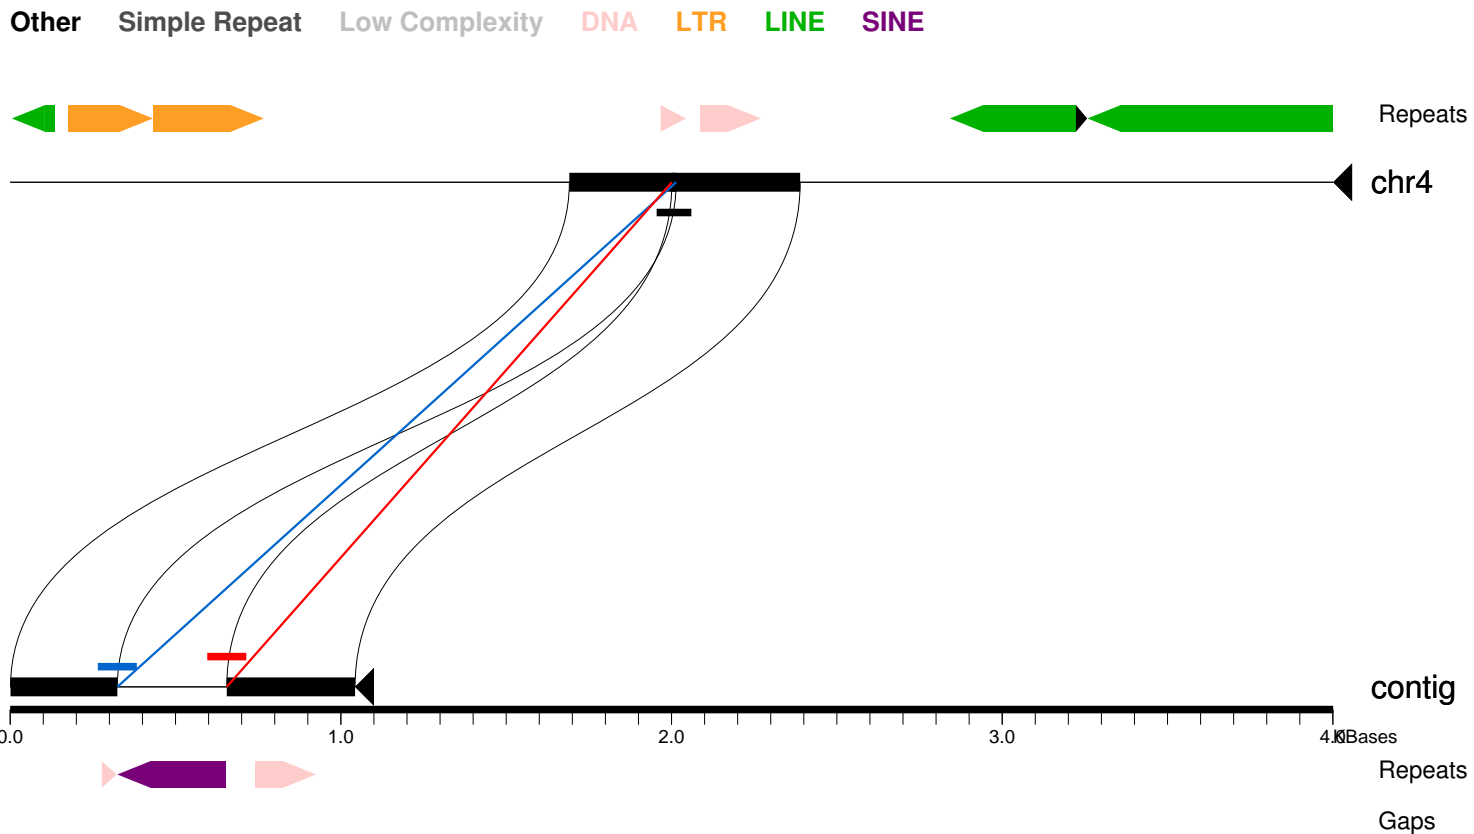

siteID: chr4\_72719821 Scafftig2 - Breakpoint: chr4:72719805

chr4:72719757-72719864

Overlap Length: 12 INS size: 298 Genotyped: Yes

```

left   CT-CTGTAGCACATTCTCTG-GTAAGTCGGTGA---TATTCAGAGCTGCTTA-----AATAACTTTT
chrom  CT-CTGTAGCACATTCTCTG-GTAAGTCGGTGA---TATTCAGAGCTGCTTA-----AATAACTTTT
right  CCACTGCACTCCAGCCTGGGCGACAGAGCGAGACTCCGTCTCAAAAAAAAAAAAAAAAAAATAATAACTTTT
      *11**1*111**11**11*1*11**111*1**11111*1***1*1111111*111111******
  
```

```

left   CGGCCGGGCGCGGTGGCTCACGCCGTGTAATCCCAGCACTTTGGGAGGCCGAGGCGGGCGG
chrom  CTTACTGTT--GGTGGTGGATTTCT-TGCTTCCA-----TGTGA--CTGGGGAGGGTAA
right  CTTACTGTT--GGTGGTGGATTTCT-TGCTTCCA-----TGTGA--CTGGGGAGGGTAA
      *222*2*2222*****222*222**2*22*2***222222**2**22*2*2**2***222
  
```

Other   Simple Repeat   Low Complexity   DNA   LTR   LINE   SINE

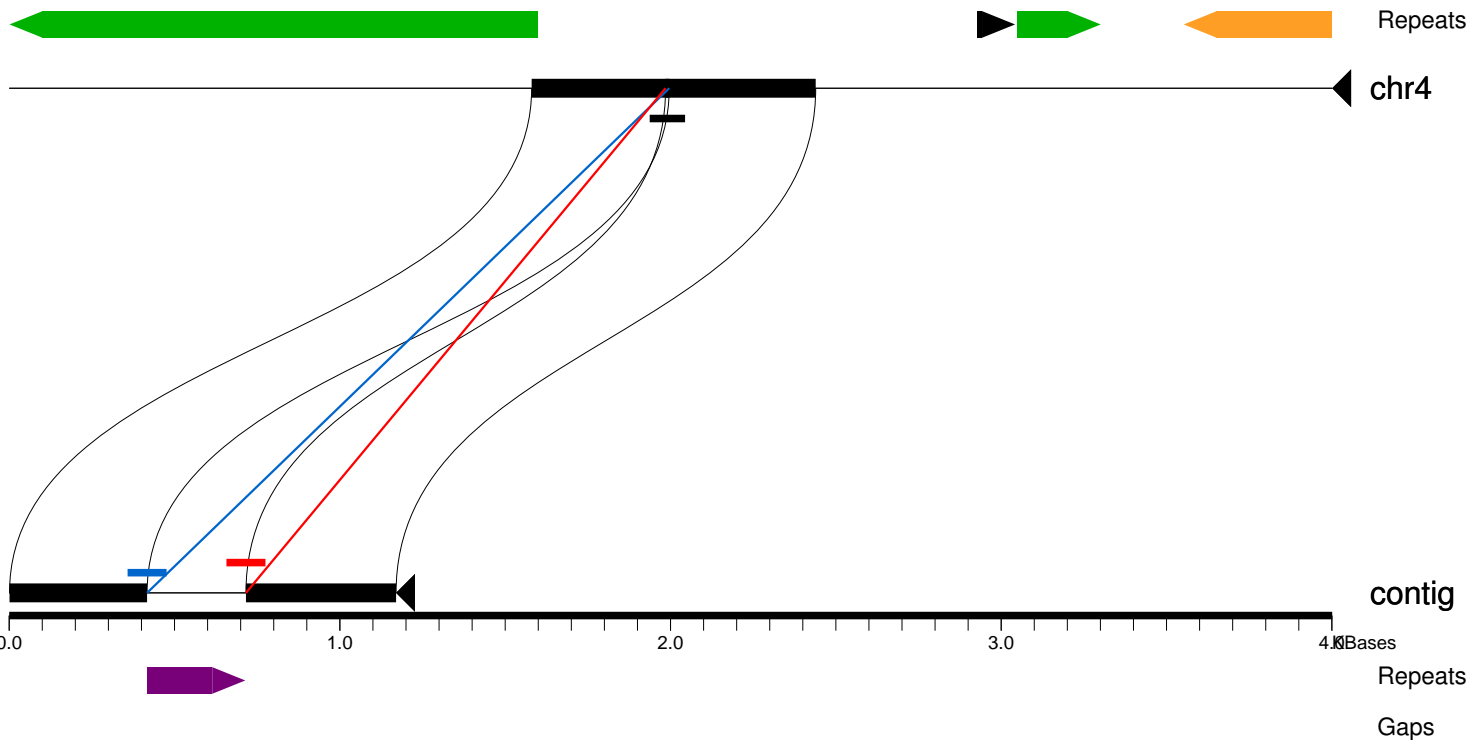







siteID: chr4\_77023820 Scafftig2 + Breakpoint: chr4:77023809

chr4:77023762-77023868

Overlap Length: 7 INS size: 310 Genotyped: Yes

```
left  CTTAATACAATGGT-----AAATAATTGGAT-ATAAAACTG---CATATAGA--GTATAAATATTATTTT
chrom CTTAATACAATGGT-----AAATAATTGGAT-ATAGAACTG---CATATAGA--GTATAAATATTAACTT
right CCGCCCGTCTCGGCCTCCCAAAGTGGCTGGGATTACAGGCATGAGCCACCGCGCCCGGCCAATATTAACTT
      *111111111111**11111111**1*11*1****1*1*2111**111**1111*111*111******22**
```

```
left  TTTTTTTTTTTTTTTTTTTTTTTTTTTTTTTTGGAGACGGAGTTTCGCTCTGTCGCCAGGCTGGAGT
chrom TTAAAAAATGTATATGTATATATATATGT---ATGCA---TAGCAAAAT-----GATTGAAAT
right TTAAAAAATGTATATGTATATATATATGT---ATGCA---TAGCAAAAT-----GATTGAAAT
      **22222*2*2*2*2*2*2*2*2*2*222*2*2*222*2**2222*222222*22**2*2*
```

Other Simple Repeat Low Complexity DNA LTR LINE SINE

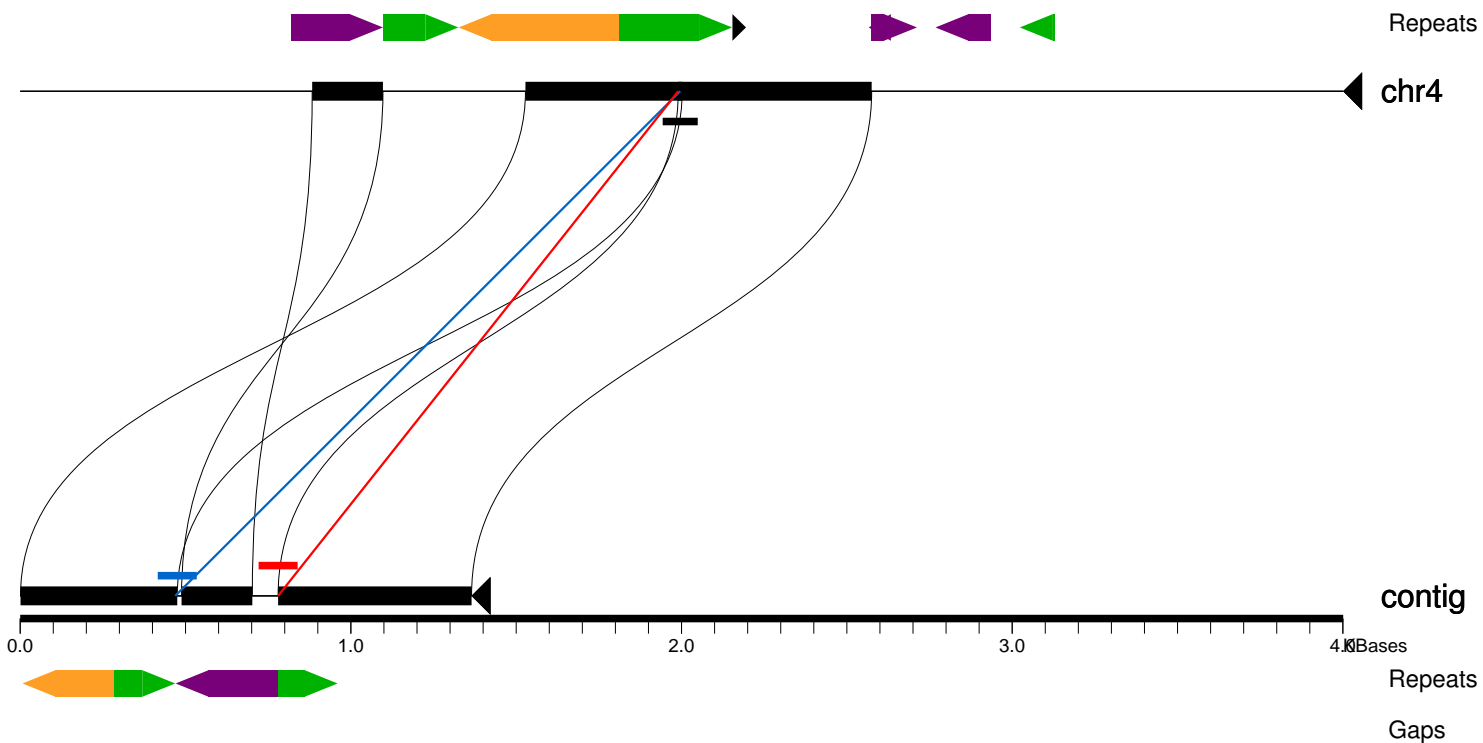

siteID: chr4\_79159493 Scafftig8 - Breakpoint: chr4:79159506

chr4:79159456-79159565

Overlap Length: 10 INS size: 314 Genotyped: Yes

```
left  ATACTTTTTCTAGTTGCTGACTCTTT-TCTTTTTTAAAGTGAATCTATTTTT-----TAAAAAAGCT
chrom ATACTTTTTCTAGTTGCTGACTCTTT-TCTTTTTTAAAGTGAATCTATTTTT-----TAAAAAAGCT
right CCTGGGCGAC-AGAGCGAGACTCCGTCTCAAAAAAAAAAAAAAAAAAATAAATAAAAAAAAAAAATAAAAAAGCT
      1111111111*1**11111*****11*1**11111***111**11**11*111111111111*****
```

```
left  AGGCCAGGCGCGGTGGCTCACGCCTGTAA-TCCCAGCACTTTGGGAGGCCGAGGCGGGCG
chrom TAAGCTTTAAATTTGA---ACTTCTGAAACTCCCAGGACA-----AGACCAATTATTG--
right TAAGCTTTAAATTTGA---ACTTCTGAAACTCCCAGGACA-----AGACCAATTATTG--
      2222*22222222**2222**22***2**2*****2**222222**2**2*22222*22
```

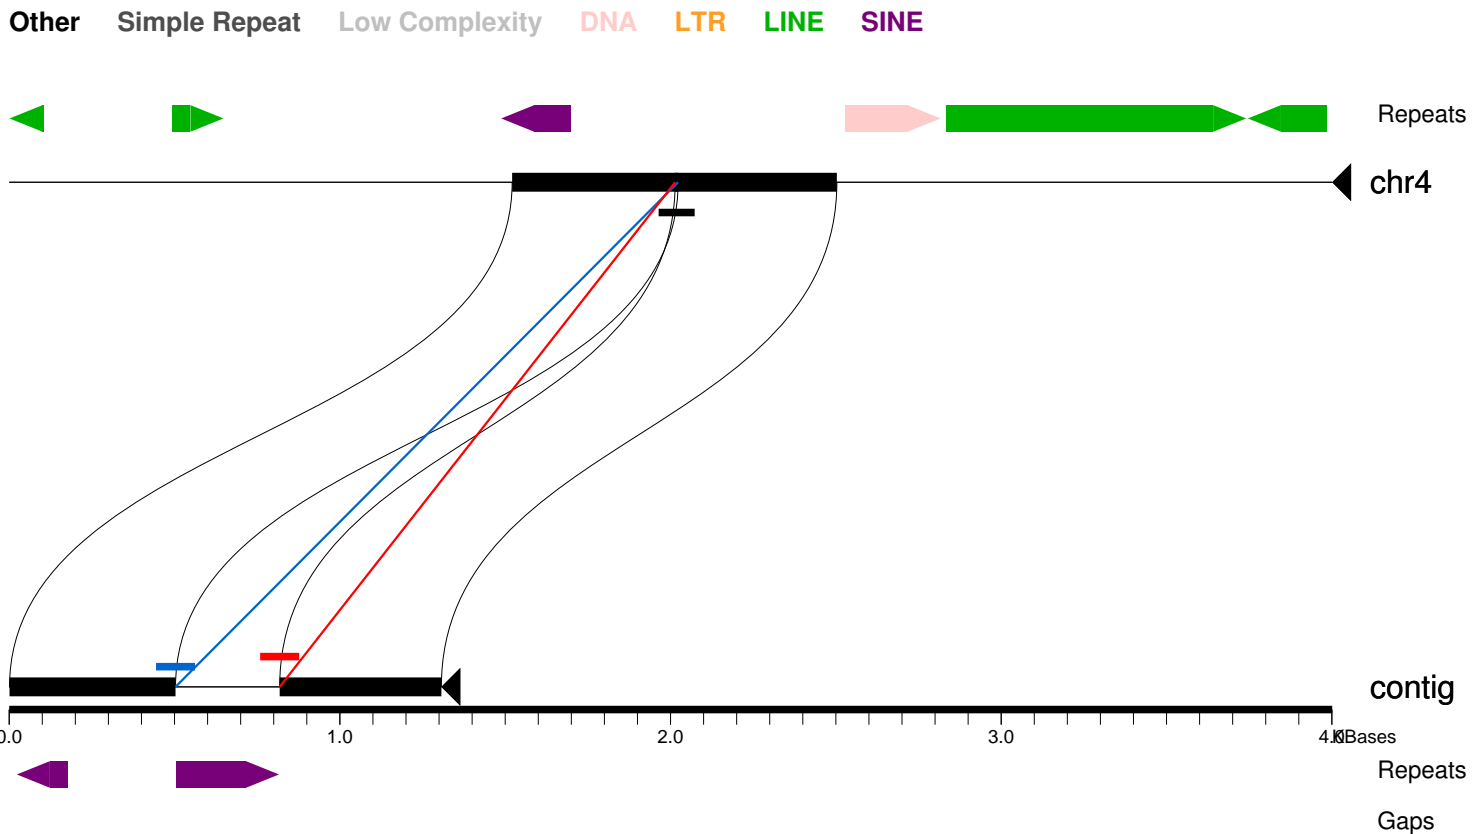

siteID: chr4\_79289439 Scaffitg4 + Breakpoint: chr4:79289435

chr4:79289275-79289609

Overlap Length: 15 INS size: 297 Genotyped: Yes

```
left -----AAAAATTCCTAGCAAAAAAAAAAAGGGATAAAAAATTTGGTCTC-ATCTAAGCTTACAACA
chrom TACACCATGCATAAAAAATTCCTAGCAAAAAAAAAA-GGGATAAAAAATTTGGTCTC-ATCTAAGCTTACAACA
right T-----TTTTTTTTTATTTTTAGTAGAGAC----GGGGTTTCACCGTGGTCTCGATCTC--CTGACCTC-
2      2NNN21111*1**1***1*1*1*11112***1*111*111*****1****111**1**11*1
```

```
left GTTAAAAATATTCCTTTTCTAATTATTGAAAAATAATTAGAACTGAAAAATCCAGTCTAGAATTTTCCCAGGAC
chrom GTTAAAAATATTCCTTTTCTAATTATTGAAAAATAATTAGAACTGAAAAATCCAGTCTAGAATTTTCCCAGGAC
right GTGA---TCCACCCCGCCTCGGCCTCCCAAA-----GTGCTGGGATTACAAGCGTGAGC---CACCGCGC
**1*111*111*1111**11111*111**111111*11**11*11*1*1*11*11**11111*1*1*11*
```

```
left CTTAAATATCAATATGCATATTCCTAATGAATGTTT-----TTTTTTTTTTTTT-----
chrom CTTAAATATCAATATGCATATTCCTAATGAATGTTTATAACAATGTCTTTCTTTGTAGGTGAAACAATA
right C-----CGGCCCTCTAATGAATGTTTATAACAATGTCTTTCTTTGTAGGTGAAACAATA
*1111111111111111*1111**********2*22222*2*2***2***2*222222222222
```

```
left -----TTTTTTTTTTGAGACGGAG-----TCTCGCTCTGTCACCCAGGCTG-GAG----TACAGTGGC
chrom GCATTCTTTTTTTTTTTTTCAGGGAGGTAATTTTCTGCACTGTGCCATATACTTTGATATCATATAGATCT
right GCATTCTTTTTTTTTTTTTCAGGGAGGTAATTTTCTGCACTGTGCCATATACTTTGATATCATATAGATCT
222222*****222*2****2222222*22**2****22*22*22**22**22222*2**2222
```

```
left GCAGC---CTCGG---CTCACTGCAAGCTCCGCCTCCCGGGTTCAC-GCCATTCTCC
chrom AAAAATCACTGGGTTTCTCTCTGTACTTTTCTCTGACACGTACTTAGAGAAGATTT
right AAAAATCACTGGGTTTCTCTCTGTACTTTTCTCTGACACGT-----
22*2*222*2**222**2**2*222*2*22**22*22**22*22**N1NN 1NN1NNN1NN
```

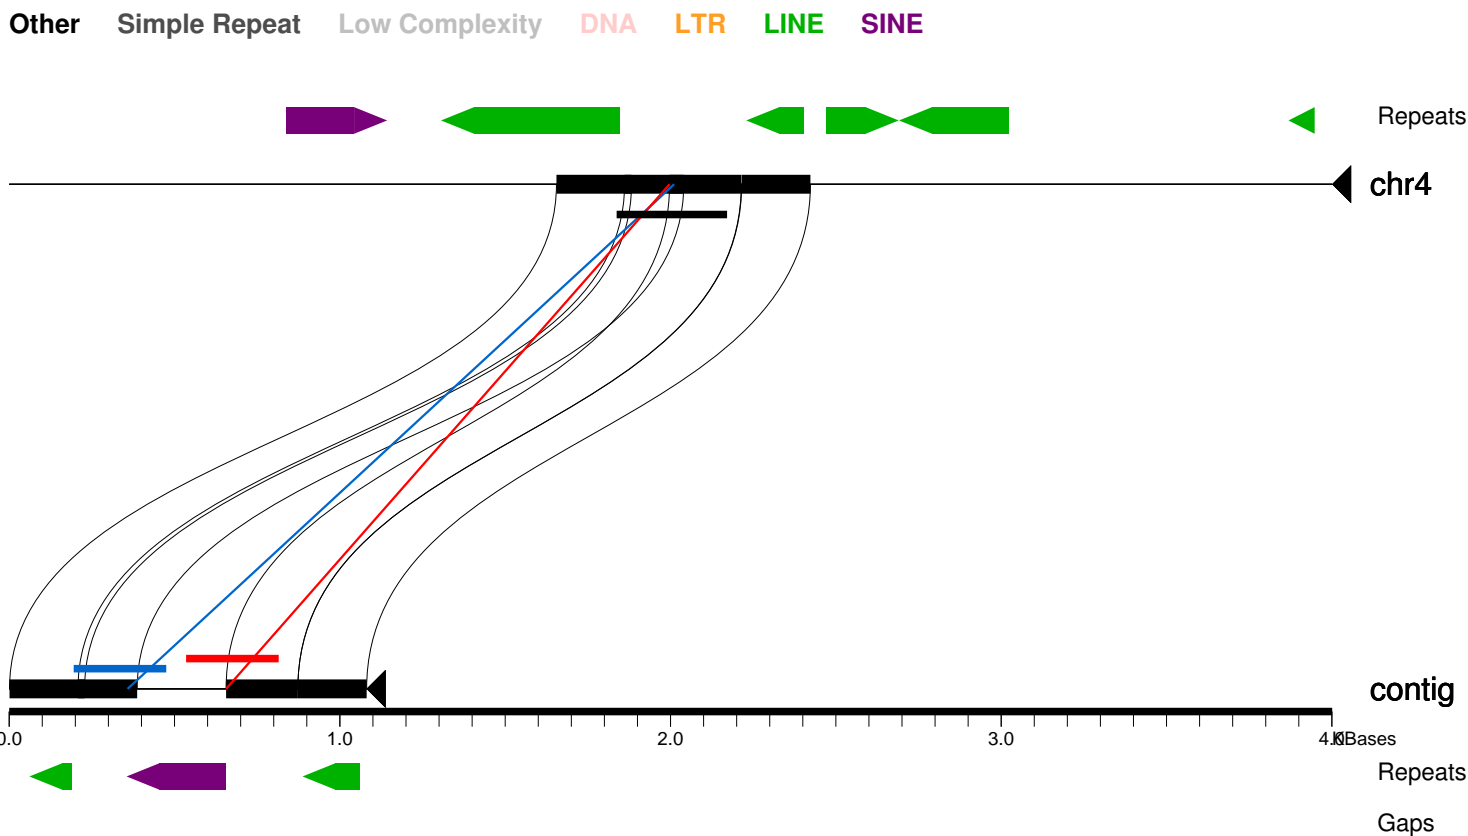

siteID: chr4\_79322989 Scaffoldig4 - Breakpoint: chr4:79322970

chr4:79322923-79323026

Overlap Length: 13 INS size: 313 Genotyped: Yes

```
left  TTT-TCCGGTA-----AATCTCAGGTAAATTAGACCATGTGTCTTGTCTAAGAAACCTGA
chrom TTT-TCCGGTA-----AATCTCAGGTAAATTAGACCATGTGTCTTGTCTAAGAACCTGA
right GCAGTCCGGCCTGGGCGACAGAGCGAGACTCCGTCTCAAAAAAAAAAAAAAAAAAAAAAAAAAAACCTGA
      1111*****1111111111111111111*11***1*11*1**11*1*11*111111111111**1*****
left  AGCTGGCCGGGCGCGGTGGCTCACGCCTGT-AATCCCAGCACTTTGGGAGGCCGAGGCGGGTGA
chrom AGCTGA-----GGTATTTTATGAAAATTAATCTCAGACCAATGATATGTC-----TTGA
right AGCTGA-----GGTATTTTATGAAAATTAATCTCAGACCAATGATATGTC-----TTGG
      ***222222222***222*2*2*2222*2*****2***22*22**22*2*2*2222222*2*1
```

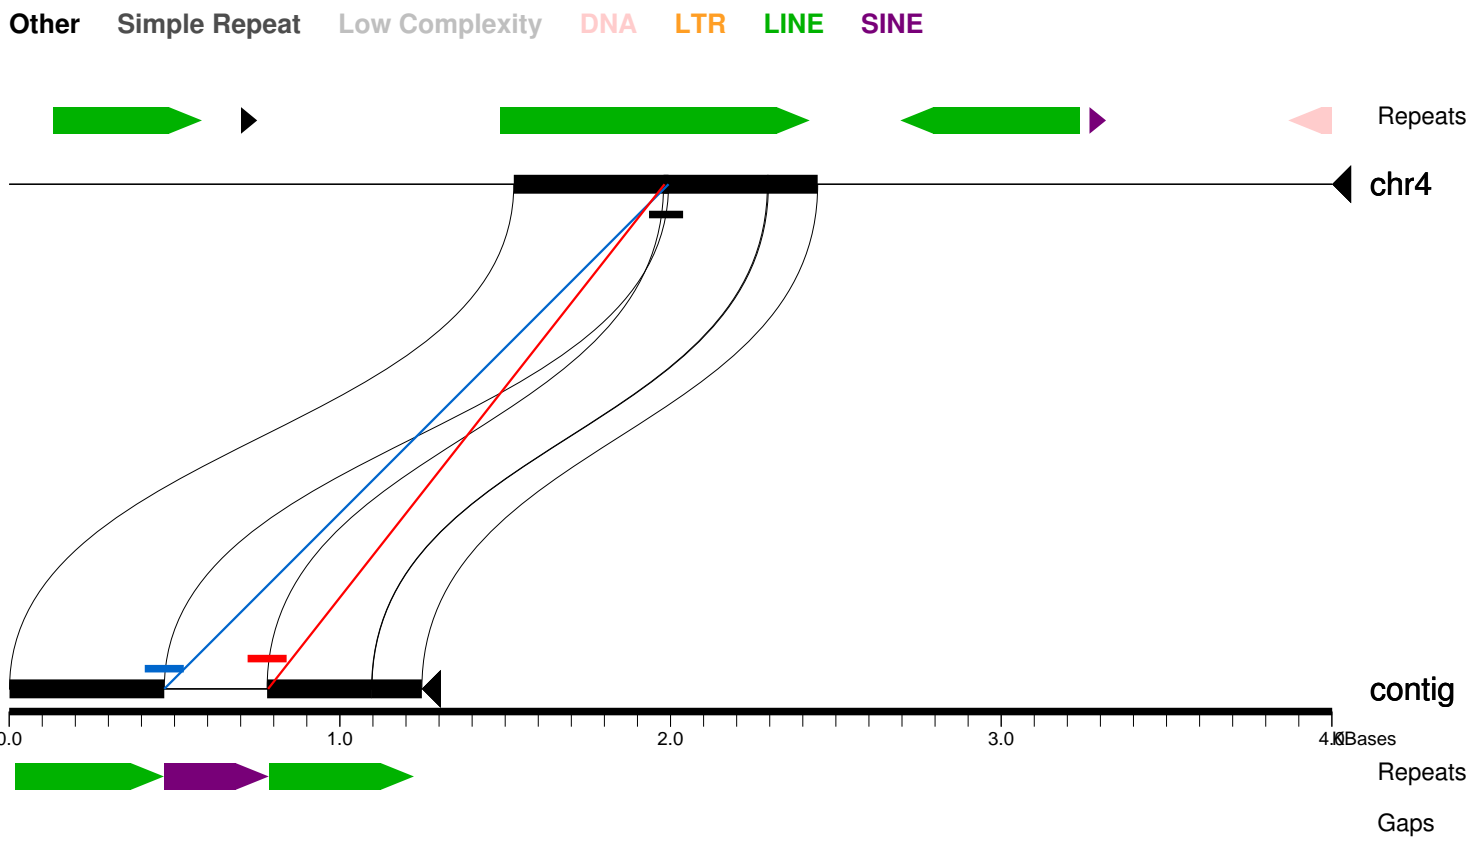

siteID: chr4\_79359173 Scaffoldig5 + Breakpoint: chr4:79359160

chr4:79359121-79359219

Overlap Length: 18 INS size: 313 Genotyped: Yes

```
left  GAACATTCATAGATTT-----GGTGCT--GATAAAATGAA--ATCCAT-----GACTTCATACA
chrom GAACATTCATAGATTT-----GGTGCT--GATAAAATGAA--ATCCAT-----GACTTCATACA
right CCACCCGCCTCGGCCTCCCAAAGTGCTGGGATTACAGGCGTGAGCCACCGCGCCCGGCCGACTTCATACA
      11**111*1*1*111*111111*****11***1*1*1*1111*1***111111111111*****

left  TTCTTTTFTTTTTTTTTTTTTTTTTTTTTTTTTTTTGGAGACGGAGTCTCGCTCTGTGCGCCAGGCCGGACTGCG
chrom TTCTTTTGTTAATCTAAAATTTTATCACGTTGA-ACA-----TTGCTTAA-----AGTGA-
right TTCTTTTGTTAATCTAAAATTTTATCACGTTGA-ACA-----TTGCTTAA-----AGTGA-
      *****2**22*2*2222*****2*2222*****2**22222222222222*2**22*222222*2**22
```

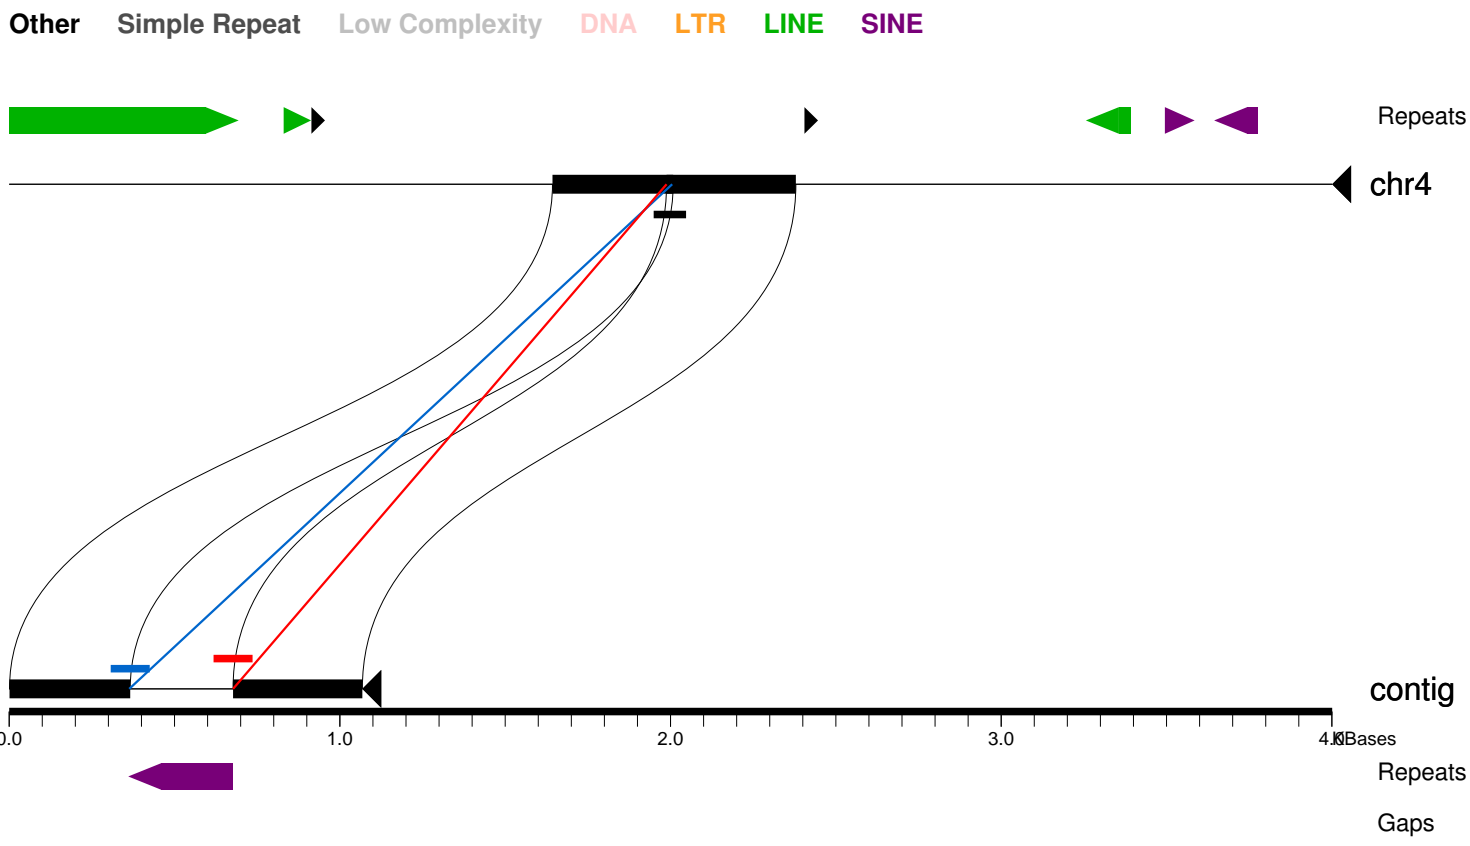

siteID: chr4\_79372145 Scaffitig1 - Breakpoint: chr4:79372137

chr4:79372097-79372196

Overlap Length: 17 INS size: 302 Genotyped: Yes

```
left      GT-----GCAATTCTGTTTAGAAGTG-GAAATATACCCCTGCGGAT-----AAAAACAAGT
chrom    GT-----GCAATTCTGTTTAGAAGTG-GAAATATACCCCTGCGGAT-----AACAACAAGT
right    GCAGTCCGCAGTCCCGCCTGGGCGACAGAGCGAGACTCCGTCTCAAAAAAAAAAAAAAAAAAAACAAAAAAAAAT
*111111***1*1*1*11*1*11*111**111*1**1**11*11*11111111111111**1**1*
```

  

```
left      GTCCCAGCCGGGCGCGGTGGCTCACGCCTGTAATCCCAGCACTTTGGGAGGCCAAGGCGGGTGGATCA-
chrom    GTCCCAGCCACACAC-----TAACACCTAAAATT-----GACAACAGCTGAATTCTCAT
right    GTCCCGCCACACAC-----TAACACCTAAAATT-----GACAACAGCTGAATTCTCAT
*****2**222*2*222222*2**2***22***2222222222222222*2*2*22**2*22222***2
```

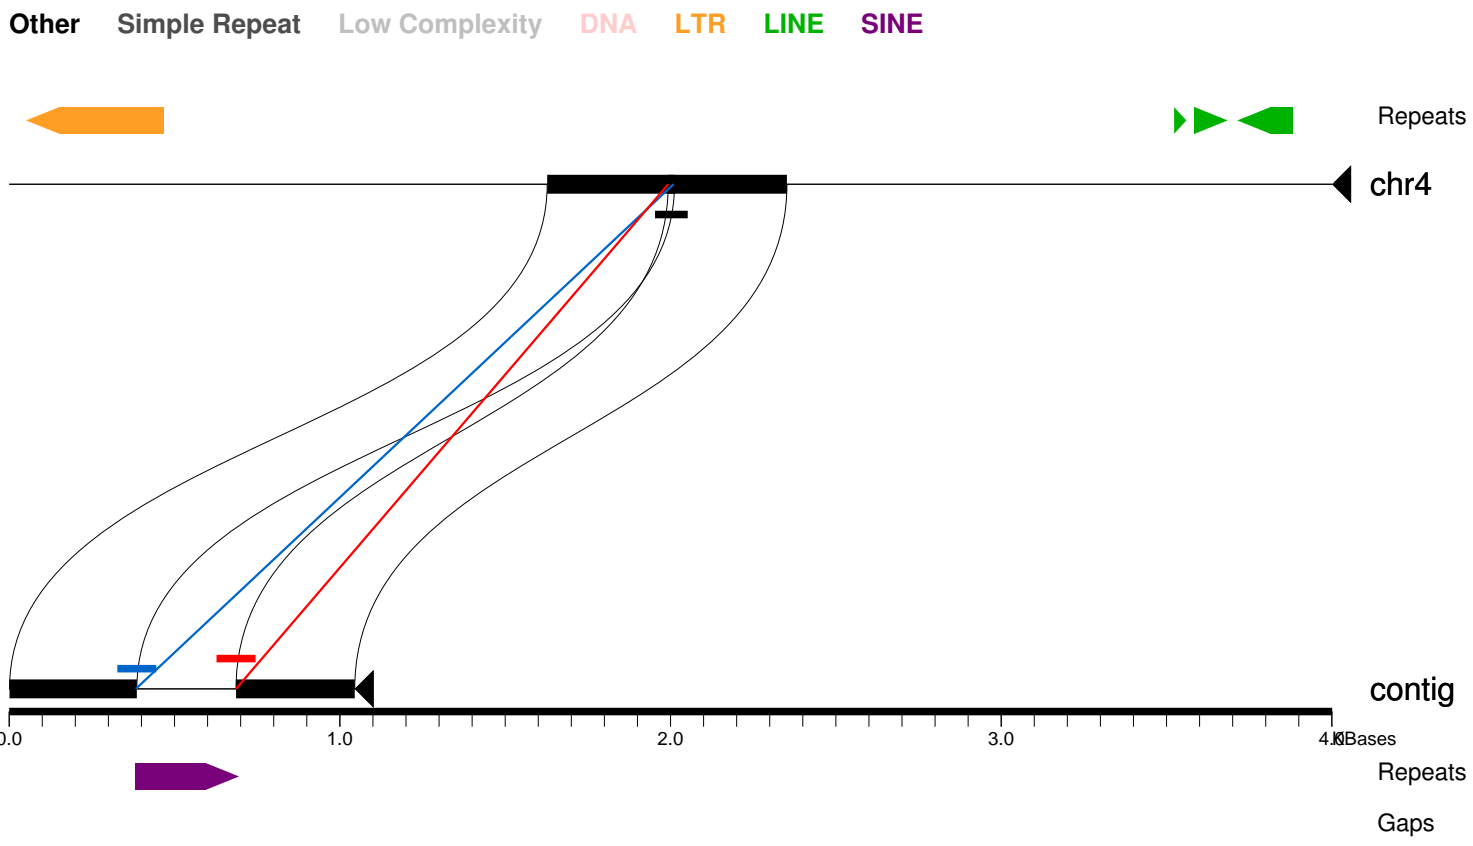



siteID: chr4\_79823616 Scaffitig1 - Breakpoint: chr4:79823605

chr4:79823556-79823664

Overlap Length: 11 INS size: 441 Genotyped: No

```
left AAACCCCTGTCACCTTGGCCTGCCTTCTGAGAAGCAGTACAGATTTGATAA-----AACCTTCTCCT
chrom AAACCCCTGTCACCTTGGCCTGCCTTCTGAGAAGCAGTACAGATTTGATAA-----AACCTTCTCCT
right NNNNNNNNNNNNNNNNNNNNNNNNNNNNNNNNNNNNNNNNNNNNNNNNNNNNNNNNNNNNNNNNNNNNN
1111111111111111111111111111111111111111111111111111111111111111111111
*****
```

```
left GGCCGGGCGCGGTGGCTCACGCCTGTAATCCAGCACTTTGGGAGGCCGAG-GCGGGTGG
chrom AATC-----CACTAATCCTTGTGA--CTAACATGGTAAATTGCTGGGAGATGATGG
right AATC-----CACTAATCCTTGTGA--CTAACATGGTAAATTGCTGGGAGATGATGG
222*222222222222**2*22*2***2*22*2*2**222*222222**2*2*2*22*2***
```

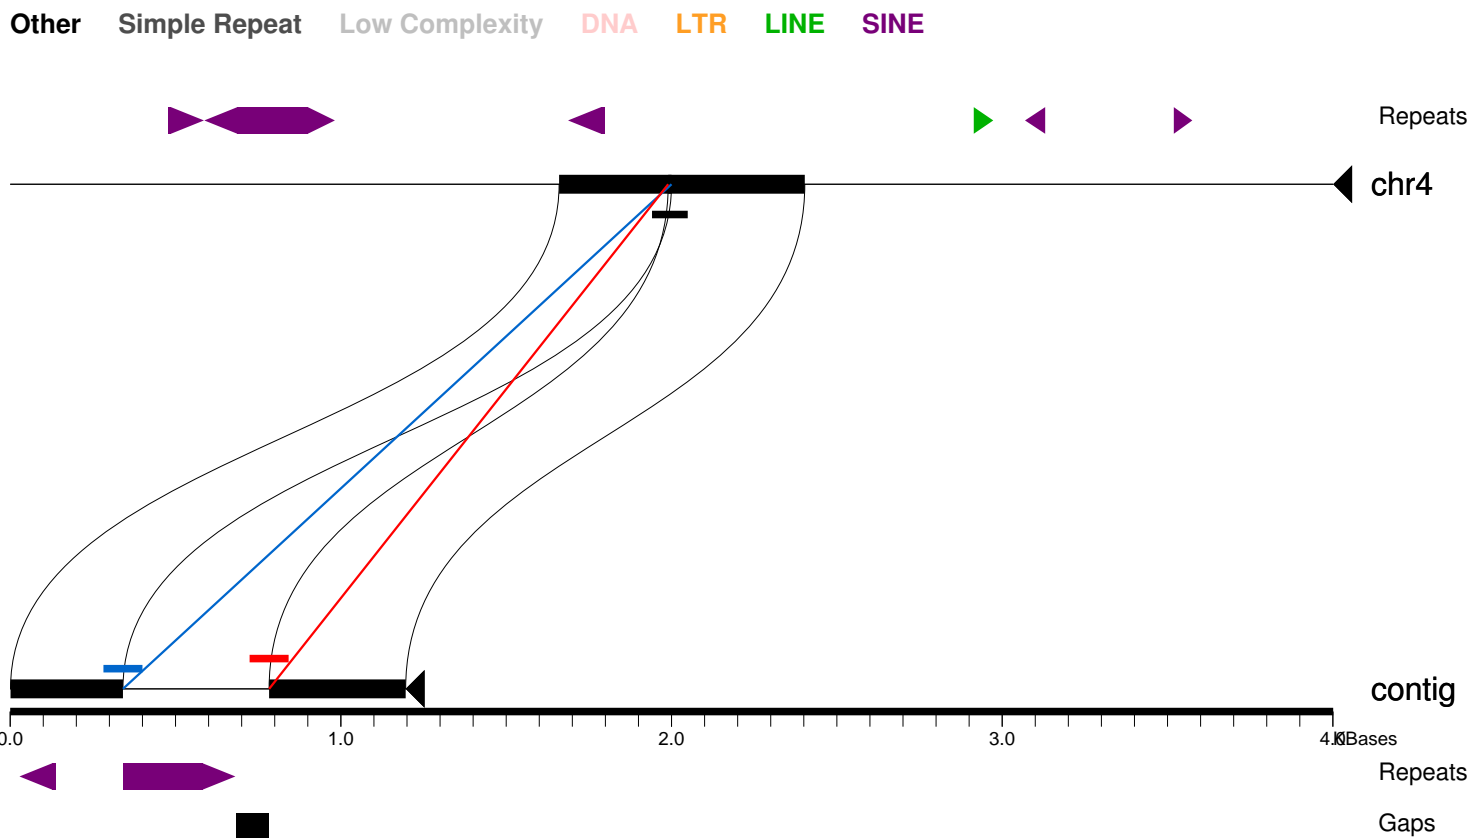

siteID: chr4\_82630143 Scaffitig4 - Breakpoint: chr4:82630133

chr4:82630089-82630192

Overlap Length: 16 INS size: 313 Genotyped: Yes

```
left      T-----ACATATTGGGT-----ACAATGTATACTACTTGTCTGACCAGTACACTAAAAATATCAGA
chrom     T-----ACATATTGGGT-----ACAATGTATACTACTTGTCTGACTAGTACACTAAAAATATCAGA
right     CTGGGCGACAGAGCGAGACTCCGTCTCAAAAAAAAAAAAAAAAAAAAAAAAAAAAAAAAAAAAAAATAATCAGA
          11111111***1*11*1*1111111111*1**111*1*11*11111111*1N*11*1*11***1*****
left      CTTCAGGCCGGGCGCGGTGGCTCACGCCTGTAATCCCAG--CACTTTGGGAGGCCGAGGCCGGGCGG
chrom     CTTCACTACTATA-CAAT---TCATCCATGTAACCAAAAACCACTT----ATCCCA-----
right     CTTCACTACTATA-CAAT---TCATCCATGTAACCAAAAACCACTT----ATCCCA-----
          *****222*22222*22*222***22*2*****2*22*222*****2222*22**2*22222222
```

Other Simple Repeat Low Complexity DNA LTR LINE SINE

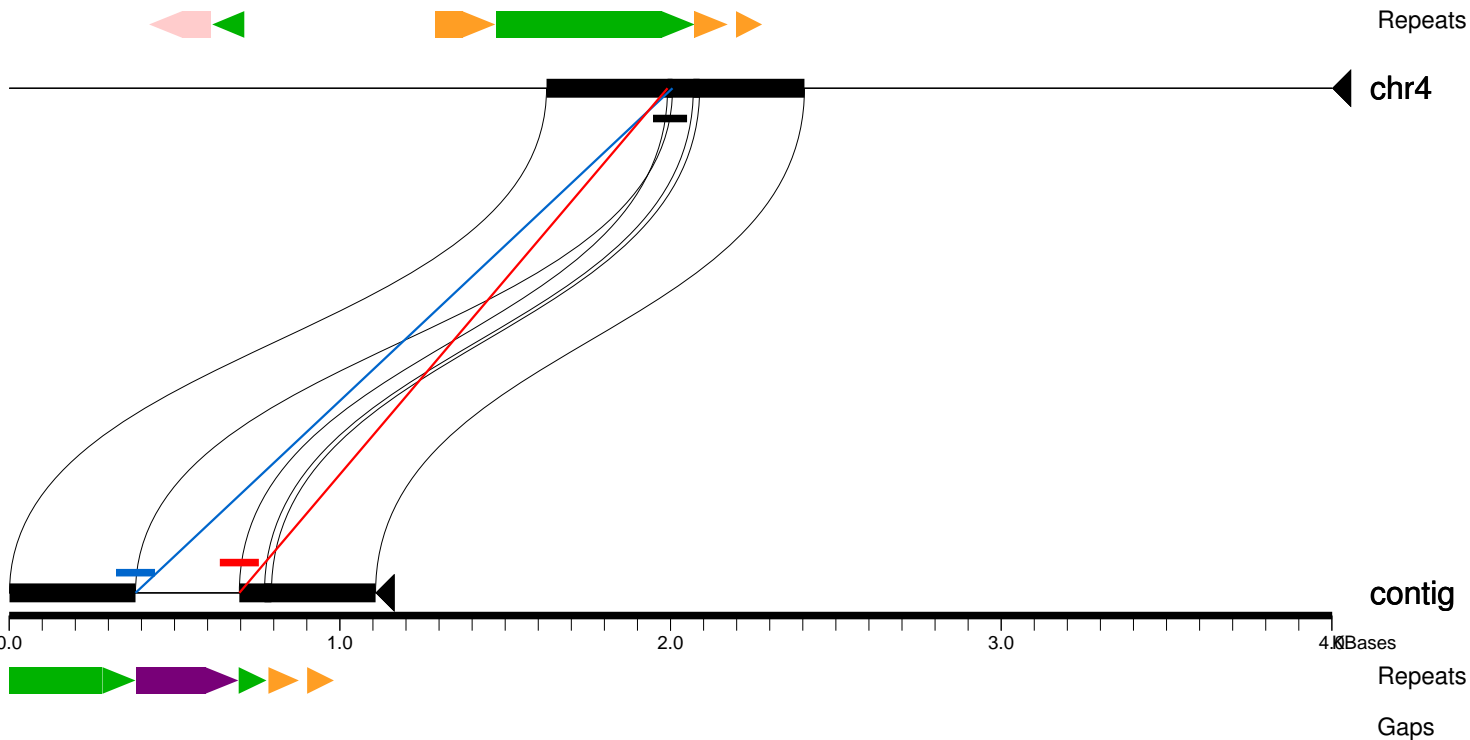

siteID: chr4\_83322517 Scaffitig4 + Breakpoint: chr4:83322561

chr4:83322514-83322620

Overlap Length: 13 INS size: 199 Genotyped: Yes

```
left  ATAGATCACATCTGTATTTAGTGACCAGAGGTT--TTTTTGTGTTGTTT-----TGTTTTTG
chrom ATAGATCACATCTGTATTTAGTGACCAGAGGTT--TTTTTGTGTTGTTT-----TGTTTTTG
right ---GACTACAGGCGCCCGCTACCACGCCCGGCTAATTTTTTGTATTTTTAGTAGAGACGGGGTGTTTTTG
      111**11***111*1111111111**1111**1*11*****1*1***1111111111111111*****
```

```
left  TTTTTTTTTTTTTTTTTTTTTTTTTTTTTTG--AGACGGAGTCTCGC-TCTGTCGCCCAGGCTGGAGTG
chrom TTTTAAATCACTTGACACTTTATTGAATGCAAAACAAGATTTAGCATCTTT-----G
right TTTTAAATCACTTGACACTTTATTGAATGCAAAACAAGATTTAGCATCTTT-----G
      ****22*222**22222***2**222**22*2**2222*2*2**2***2*222222222222222*
```

Other Simple Repeat Low Complexity DNA LTR LINE SINE

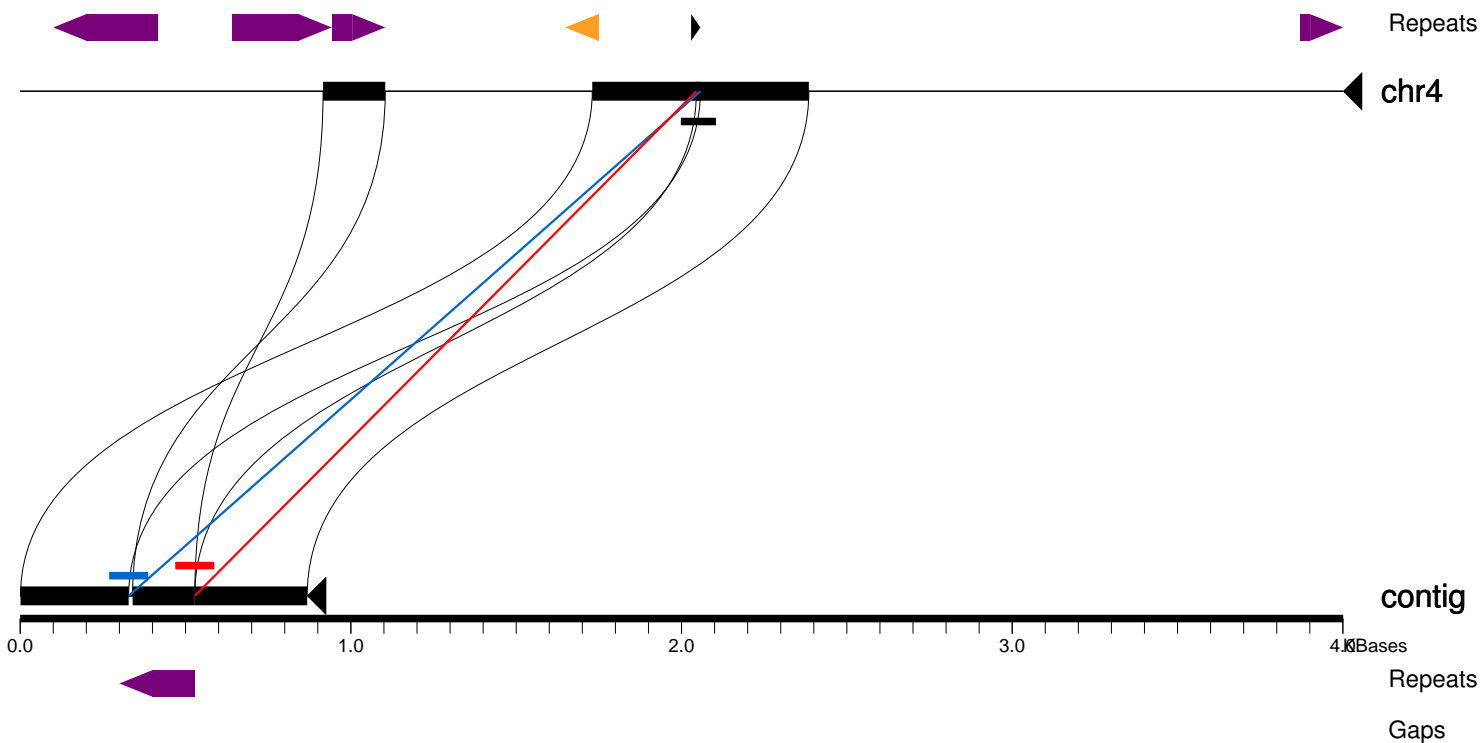

siteID: chr4\_86099297 Scaffitig5 + Breakpoint: chr4:86099305

chr4:86099258-86099364

Overlap Length: 13 INS size: 256 Genotyped: Yes

```
left  A-TAACA---TTACCCTTCATATTTTGTC--GTAATTCATTATC-TCATTCTT-----TCTTTGTAAGT
chrom A-TAACA---TTACCCTTCATATTTTGTC--GTAATTCATTATC-TCATTCTT-----TCTTTGTAAGT
right GGTAGCCAGGATGGTCTCGATCTCCTGACCTCGTGATCCGCCCGCCTCGGCCTCCCAAAATCTTTGTAAGT
      11**1*11111*111**11**1*11**1*111**1**1*11111*1**111**111111*****

left  TT-----TTTTTTTTTTTTGAGACGGAGTCTCGCTCTGTCTGCCAGGCTGGAGTGCAGTGGCGCGA
chrom TTAGAAGTCTTAACTTCTTG-----GTCTTGTTTC---ATCTCAGATATTAGTGTTC-----
right TTAGAAGTCTTAACTTCTTG-----GTCTTGTTTC---ATCTCAGATATTAGTGTTC-----
      **22222*2**222**2***2222222*****2*2**22222*2***22222*****222*2222222
```

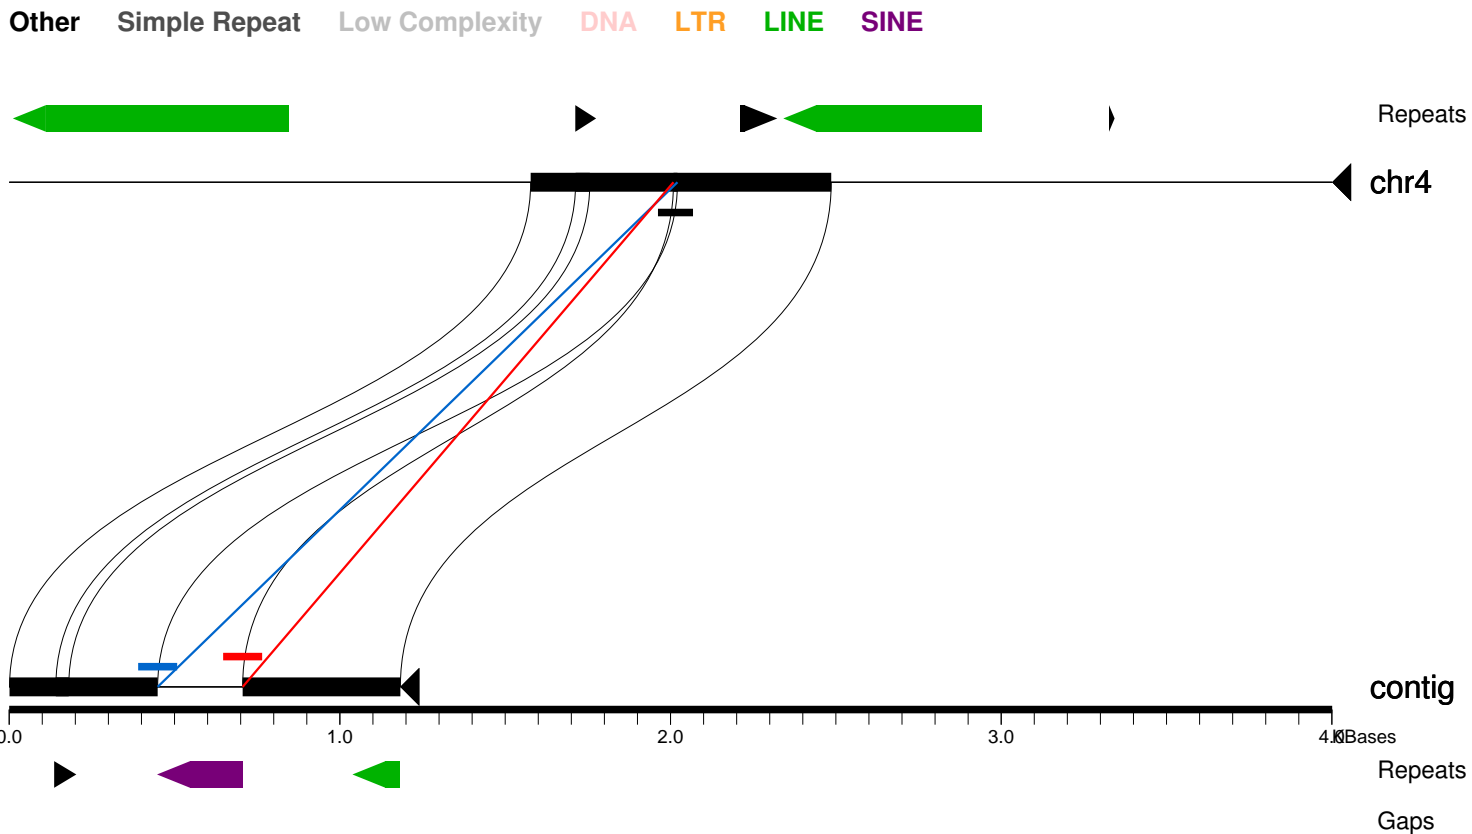

siteID: chr4\_86470376 Scaffold3 - Breakpoint: chr4:86470374

chr4:86470323-86470430

Overlap Length: 9 INS size: 307 Genotyped: Yes

```
left  T--CTGAATTGGAATCA-----CTAAGTCATAGATACAGGTATATTTAATTTTATAAGAAA-TTGCC
chrom T--CTGAATTGGAATCA-----CTAAGTCATAGATACAGGTATATTTAATTTTATAAGAAA-TTGCC
right CTCCAGCCTGGGCGACAGAGCGAGACTCCGTCTCAAAAAAAAAAAAAAAAAAAAAAAAAAAAAAAATAAATTGCC
      111*1*11*1**111**11111111**11***11*1*1*1*111*1*111**1111*1**1***1*****
```

```
left  AGCCG----GGCGCGGTGGCTCACGCCTGTAATCCACAGCACTTTGGGAGGCCGAGGCGGGCGGA
chrom AACATTTTGTAAAGTGGTTGCACCATTTA-----CACTTTCACCAGCAATAT-----
right AACATTTTGTAAAGTGGTTGCACCATTTA-----CACTTTCACCAGCAATAT-----
      *22*22222*22222****2*2222*2*2**2222222*****22222*2222222222222
```

Other Simple Repeat Low Complexity DNA LTR LINE SINE

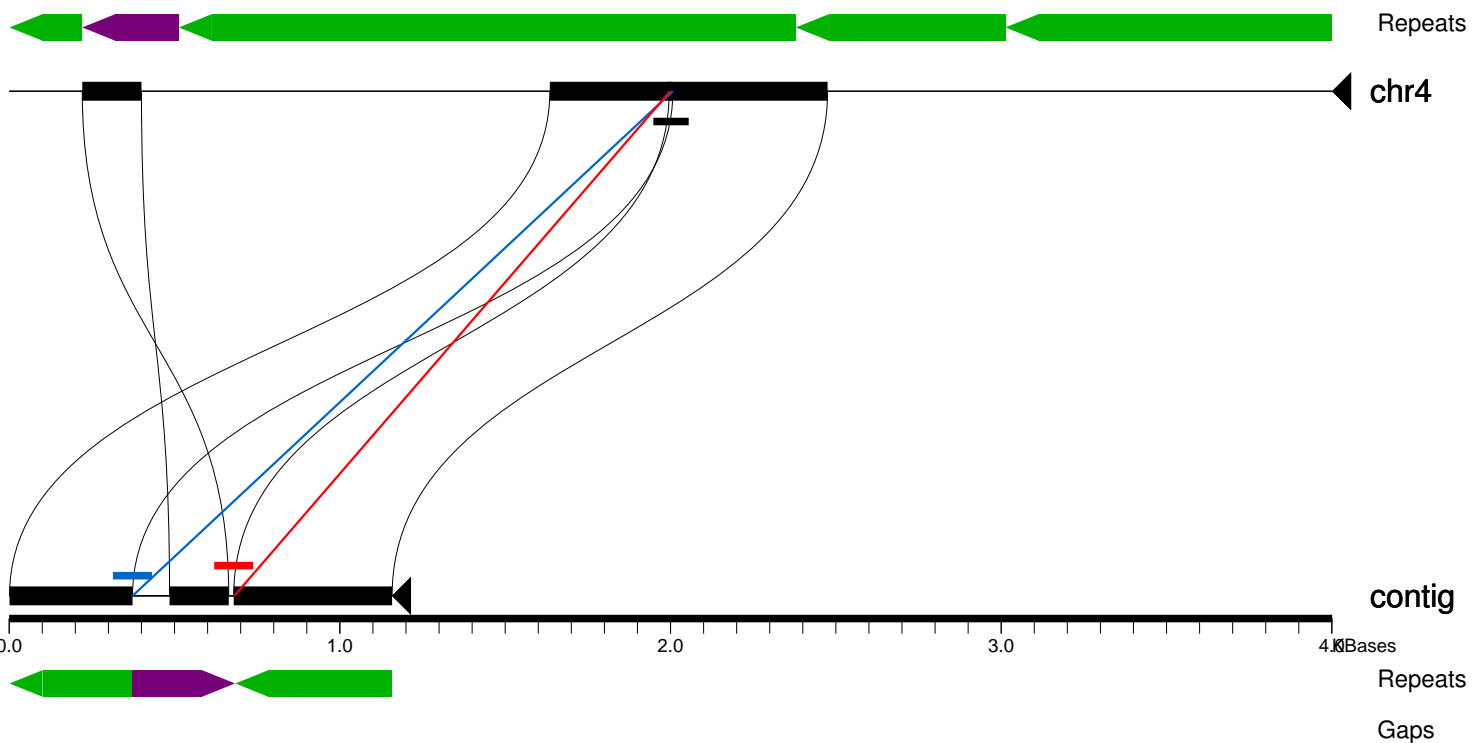





siteID: chr4\_92270957 Scaffitg1 - Breakpoint: chr4:92270943

chr4:92270783-92271117

Overlap Length: 15 INS size: 308 Genotyped: Yes

```
left -----GTCAGGCCTTTCAAAAATGGTTACTTTTTCTCTTCCCCTGCTGGAAGCAAGAGAG
chrom AATAGTTTGTCTTGAGGTCAGGCCTTTCAAAAATGGTTACTTTTTCTCTTCCCCTGCTGGAAGCAAGAGAG
right GAGAAT--GGCGTGAACCCGGG-----AGGCGGAG-----CTTGCACTGAGCC-GAGA-
N2N2N2 2N2N222N11*1**1111111*111**1111111111111111*1***1*11***11***1
```

```
left TTTTTCTTTTTTTTTTTTTTCCCTTTCAGGTTTTCACTGAGAGAACCCAACCTGGGCTGTAGGAGGTACATTTT
chrom TTTTTCTTTTTTTTTTTTTT-CCTCTCAGGTTTTCACTGAGAGAACCCAACCTGGGCTGTAGGAGGTACATTTT
right --TCCC GCCACTGCACT-CCAGCCTGGGCGACAGAGCGAGACTCCGTCTCAAAAAAAAAAAAAAAAAAAAAA
11*11*111111*11111*2**1N1*1**1111*11*1***11*11*1111111*11*111*1*1111
```

```
left ATGAAAGTTTGGGGGCTCGTAAGATTGTGTTCCCGGCCGG-----CGCGGTGGCTCACGCC---T
chrom ATGAAAGTTTGGGGGCTCGTAAAGATTGAGTTCCCTAGAAATTTTTTCCACACTGTGCCTTCAGCAATTT
right AAAAAA-----AAGATTGAGTTCCCTAGAAATTTTTTCCACACTGTGCCTTCAGCAATTT
*11***1111111111111111*2*****2*****2222222222222*2*2***2**222**2222*
```

```
left GT-AATCCCAGCACTTTGGGAGGCCGAGGCG-----GGCGGATCACG-----AGG-----
chrom GTCAATTACAG--TTTAGGGTTTCCCTAACAGCATTGTTTCCCATGGAGGTTTCTGCTTCTAGGCTTCTGC
right GTCAATTACAG--TTTAGGGTTTCCCTAACAGCATTGTTTCCCATGGAGGTTTCTGCTTCTAGGCTTCTGC
**2***22***222**2***222**2*222*2222222222222*2**2*222*22222***2222222
```

```
left -TCAGGAGATCGAGACCATCCCG-CTAAAACG-GTGAACCCCGTCTCTACTA--AA
chrom TTCAGTAAATCGTGATTCTCTGTATCTTACCTGTGTGTCTCTCCATTTTAGGGAGCAA
right TTCAGTAAATCGTGATTCTCTGTATCTTACCTGTGTGTCTCTCCA-----
2***2*2***2**222**22222**2*222*2***222*2**21N1NNNNN1 11
```

Other Simple Repeat Low Complexity DNA LTR LINE SINE

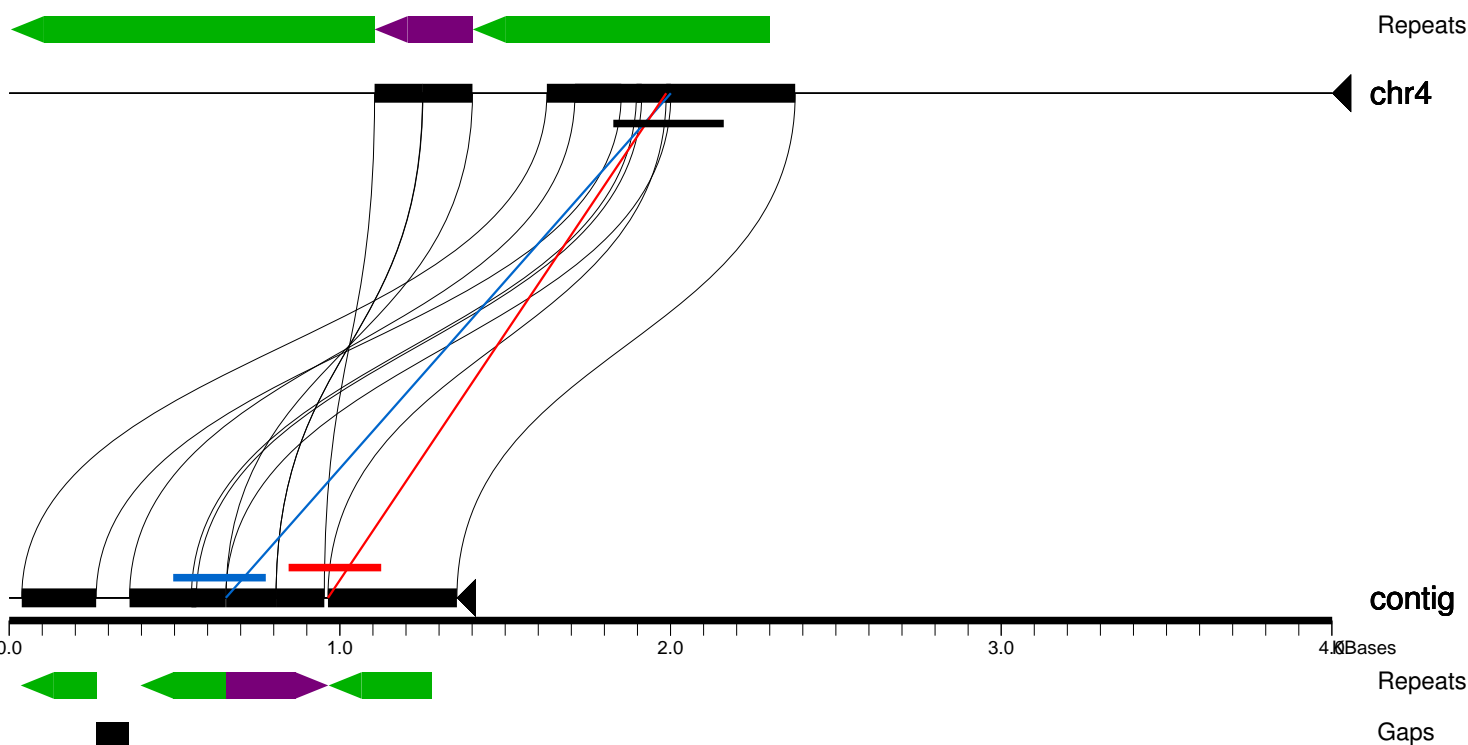



siteID: chr4\_92704639 Scaffitg3 - Breakpoint: chr4:92704646

chr4:92704596-92704705

Overlap Length: 10 INS size: 277 Genotyped: Yes

```
left   TTG---TGG----CATATTGATATAAGGGA--ATAATATTCAGATATTTTAAGTAAGTTAAAAACATACAT
chrom  TTG---TGG----CATATTGATATAAGGGA--ATAATATTCAGATATTTTAAGTAAGTTAAAAACATACA-
right  CCGACCTGGGCGACAGAGCGAGACTCCGTCTCAAAAAAAAAAAAAAAAAAAAAAAAAAAAAAAAAAAAAA-
      11*111***1111**1*11**1*1111*1111*1**1*111*1*1*1111**11**111*****2
```

```
left   TGGGAGGCCGAGGCGGGTGGATCATGAGGTCAGGAGATCGAGACCATCCTGGCTAACA
chrom  ----ACATATAAAATATTTAAAAATAATTA--TCCTGAGT--GATAAAATGCAAACATAAAT
right  ----ACATATAAAATATTTAAAAATAATTA--TCCTGAGT--GATAAAATGCAAACATAAAT
      2222*22222*222222222**2**2*22**22***222**2*22**2*222*****22
```

Other Simple Repeat Low Complexity DNA LTR LINE SINE

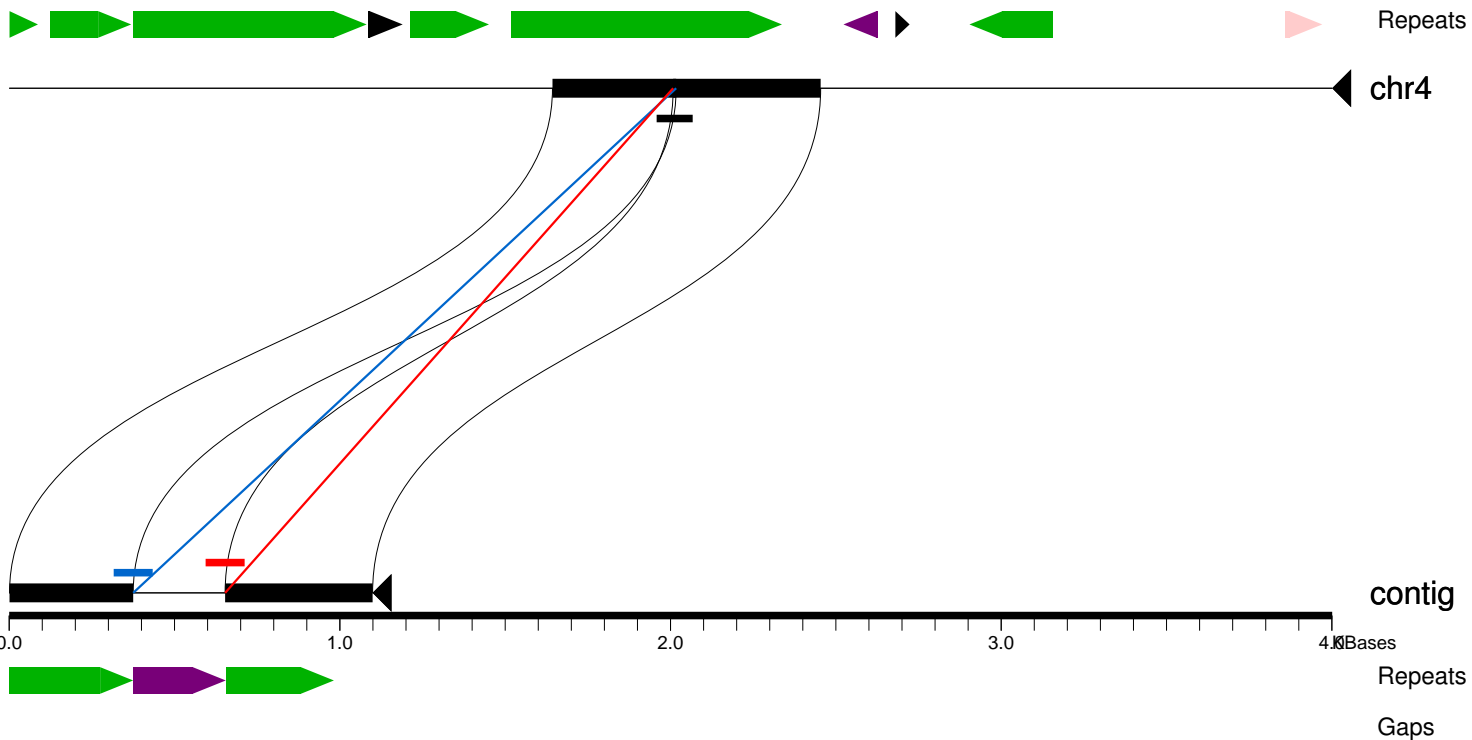

siteID: chr4\_93363271 Scaffold1 + Breakpoint: chr4:93363281  
 chr4:93363235-93363340  
 Overlap Length: 14 INS size: 546 Genotyped: No

```

left   GCCCTTGAAAAGAAGGTAATGTGGAGTGGGT-----GCCTCCATATTGATTAAGAAGGGGAC
chrom  GCCCTTGAAAAGAAGGTAATGTGGAGTGGGT-----GCCTCCATATTGATTAGAAGGGGAC
right  NNNNNNNNNNNNNNNNNNNNNNNNNNNNNNNNNNNNNNNNNNNNNNNNNNNNNNNNNNNNNNNN
       11111111111111111111111111111111111111111111111111111111111
       *111*11*****

left   GGGNNNNNNNNNNNNNNNNNNNNNNNNNNNNNNNNNNNNNNNNNNNNNNNNNNNNNNNNNNNN
chrom  GGGCTTACCTTCCACTGTGAGAGTTACCTGAAGCTTGGCGTCCGTGATG-----
right  GGGCTTACCTTCCACTGTGAGAGTTACCTGAAGCTTGGCGTCCGTGATG-----
       **2222222222222222222222222222222222222222222222222222222222
  
```

Other Simple Repeat Low Complexity DNA LTR LINE SINE

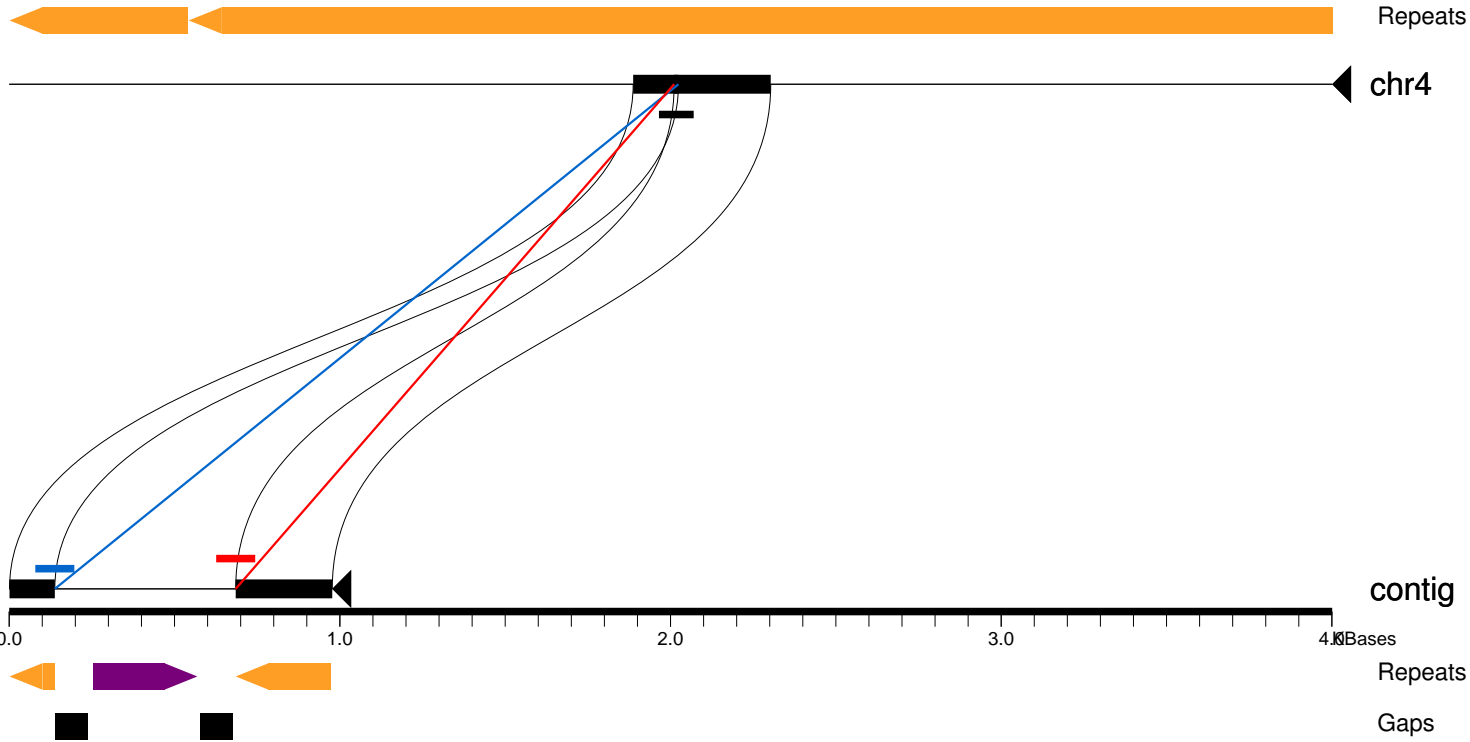



siteID: chr5\_100060196 Scafftig4 + Breakpoint: chr5:100060168

chr5:100060123-100060227

Overlap Length: 15 INS size: 263 Genotyped: Yes

```
left  TGAATGATATCTTATTTAGGAAAAAGGGGTATT---TGCATGTGAAGT-----TAATTTAAGGA
chrom TGAATGATATCTTATTTAGGAAAAAGGGGTATT---TGCATGTGAAGT-----TAATTTAAGGA
right CCGCCCGCCTCGGCCTCCCAAAGTGCTGGGATTACAGGCGTGAGCCACCGCGCCCGGCCTAATTTAAGGA
      1111111111**1111*1111**11111**1***1111**1**1*11111111111111111111*****
```

```
left  TTTTFFFFFFFFFFFFFFFFFFFFFFFFGAGACGGAGTCTCGCTCTGTCGCCCAGGCTGGAGTGCAGTG
chrom TTTTAAAGATAAGAAAATTATCCTGGAT-----TAACTGGGTGGGCCT-----TAAATCT
right TTTTAAAGATAAGAAAATTATCCTGGAT-----TAACTGGGTGGGCCT-----TAAATCT
      ***2222*2222222**2*2222**2222222*22**22**2*2**22222222*22*222
```

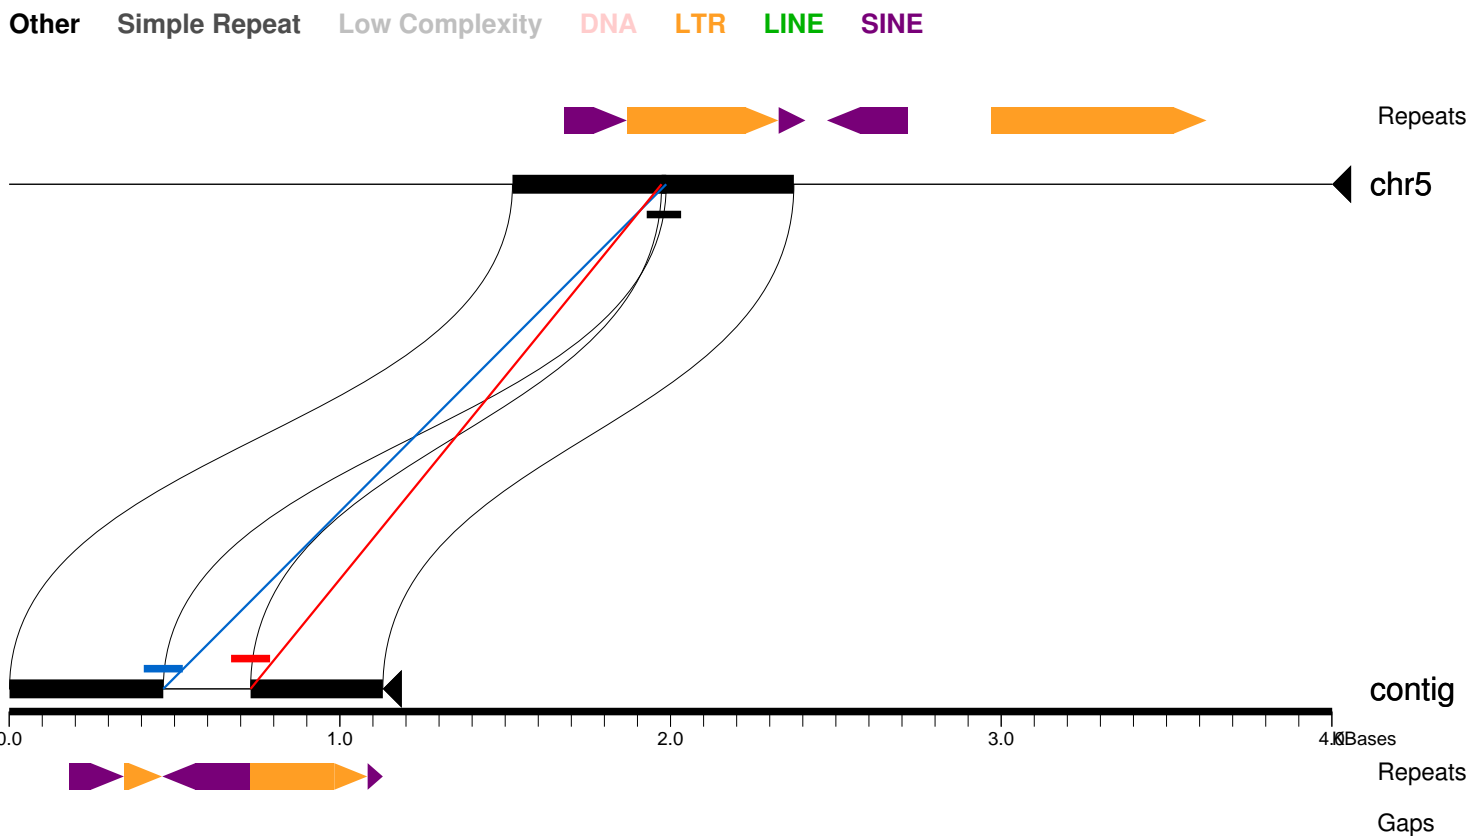

siteID: chr5\_102343442 Scafftig2 - Breakpoint: chr5:102343462

chr5:102343417-102343521

Overlap Length: 15 INS size: 377 Genotyped: No

```

left  AATTGTGTT-----ATCTTA-----ATGTGCTCT-TTTTATAAATT--TTCTTTGCTATATATTTCACA
chrom AATTGTGTT-----ATCTTA-----ATGTGCTCT-TTTTATAAATT--TTCTTTGCTATATATTTCACA
right GACGGGGTTTACCCGTGTTAGCCAGGATGGTCTCGATCTCCTGACCTCGTGTGATCCGCCCTATATTTCACA
      1*11*1***1111111*1***111111***11***11*1*11*1*11*11*11*11*11*11***11*****

```

```

left  TCTTNNNNNNNNNNNNNNNNNNNNNNNNNNNNNNNNNNNNNNNNNNNNNNNNNNNNNNNNNNNNNNNNNNNN
chrom TCTT-----AAAAGTATCTTACAACCTGTTAGTGTGTCTAACTCAGTTTTGATT
right TCTT-----AAAAGTATCTTACAACCTGTTAGTATGTTCTAACTCAGTTTTGATT
      ***22222222222222222222222222222222222N22222222222222222222

```

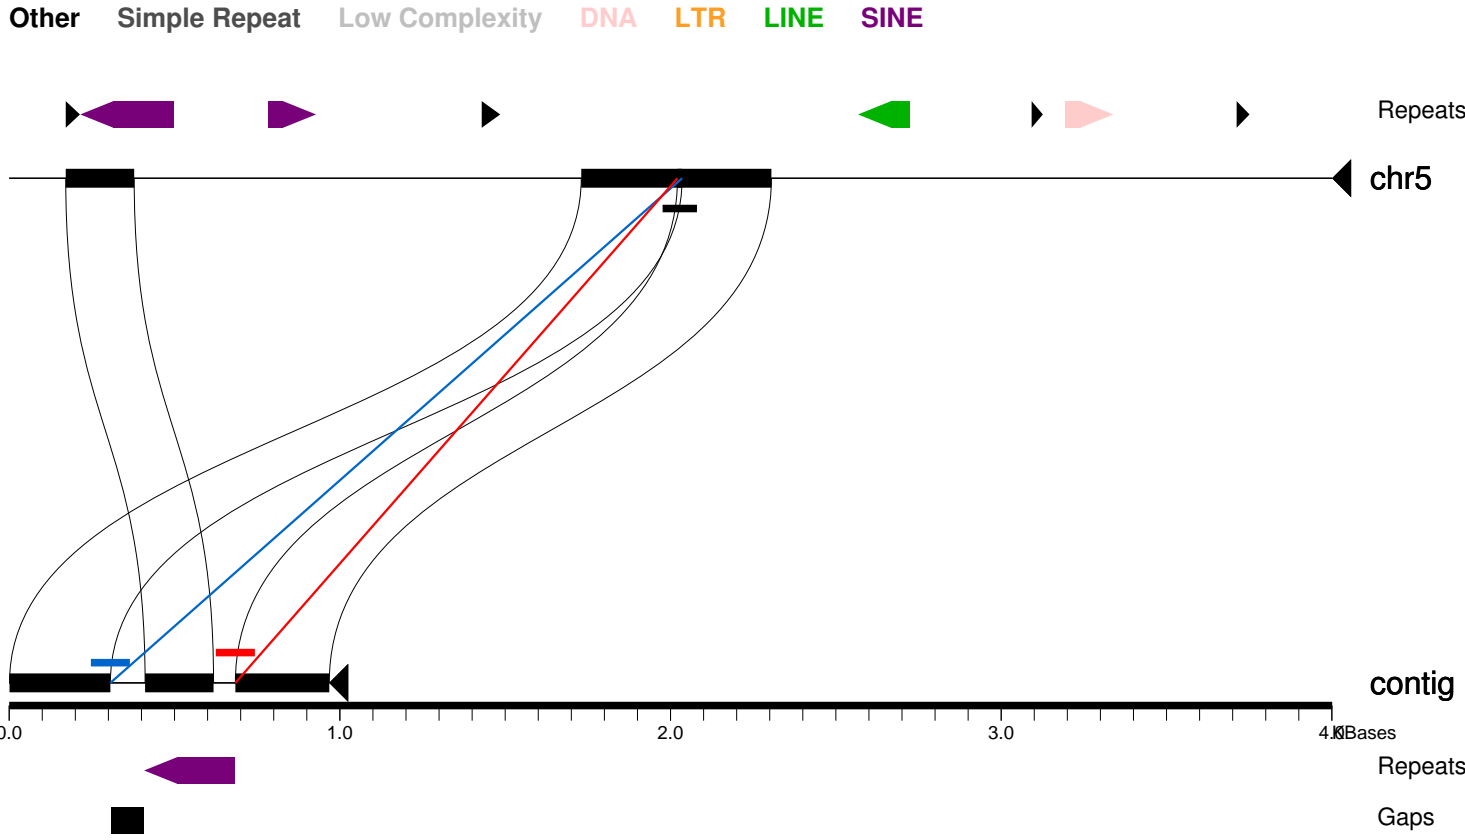

siteID: chr5\_103464399 Scaffoldig1 + Breakpoint: chr5:103464408  
 chr5:103464248-103464586  
 Overlap Length: 19 INS size: 307 Genotyped: Yes

```

left  -----TTTCAATCATATAGAGTTCTGGAAATTC AATATTATCTATCTTATTATA
chrom AACCTCTTACGCAATACCAC TTTCAATCATATAGAGTTCTGGAAATTC AATATTATCTATCTTATTATA
right AG-----AATGGCG---TGAACCC---GGGAAGCGGAGCTTGCAG-TGAGCCG-----AGA
      2N                    222NN2N  11*1**1*11111*1*1111***11**11*11*1*1*111111111*1*
left  TTTACAGTGGTATTTT GACTTCCCCTATAGACTGGAAATTTGGCTTCCTGGCAGCTCACGAGCACCCTTGA
chrom TTTACAGTGGTATTTT GACTTCCCCTATAGACTGGAAATTTGGCTTCCTGGCAGCTCGCGAGCACCCTTGA
right TT----GCGCCACT--GCAGTCCGC---AGTCTGGCC-TGGGC-----GACAGAGCGAGA-CTCCGTCTA
      **1111*1*11*1*11*111**1*111**1***111*1***11111*1***11*21**1*1**1*11*
left  CATTTAAAAGAGATTTAGTTAAGAAATAATATATTTTGC GGGGCC-----GGGCGCGGTGGC
chrom CATTTAAAAGAGATTTAGTTAAGAAATAATATATTTTGC GGGGCC-----GGGCGCGGTGGC
right AAAAAAAAAAAAAAAAAAAAA--AAGAAATAATATATTTTGC TTGGCTTATTTGCATTTAAGGGCTTGGTGG-
      1*111***1*1*111*111* **** *22***22222222222222** **22***2
left  TCACGCC--TGTAATCCCAGCACTTTGGGAGGCCGAGCGGGTGGATC-ATGAGGTCAGGAG--ATCGAG
chrom TGGGGACAATGCAAGTCTGGAATTTAAAAGAGCCTA--CAGCAGGAAATATCACTTTAAAAGCTATCGTA
right TGGGGACAATGCAAGTCTGGAATTTAAAAGAGCCTA--CAGCAGGAAATATCACTTTAAAAGCTATCGTA
      *222*2*22**2**22*22*2*2**222222***2*22*2*22***222**2*22*2*22**22***22
left  ACCATCCTGGCTAACA--AGGTGAAACCCCGTCTC--TACTAA-----A
chrom ATATTTGATAGTTAAAACCATGTTAATTTGATGTCTTCTTGGTAAGGAAAAGAAAAATATAGAGA
right ATATTTGATAGTTAAAACCATGTTAATTTGATGTCTTCTTGGTAAGGAAAAG-----
      *222*22*2*2**2**22*2**2**22222***222*22***222222                1
  
```

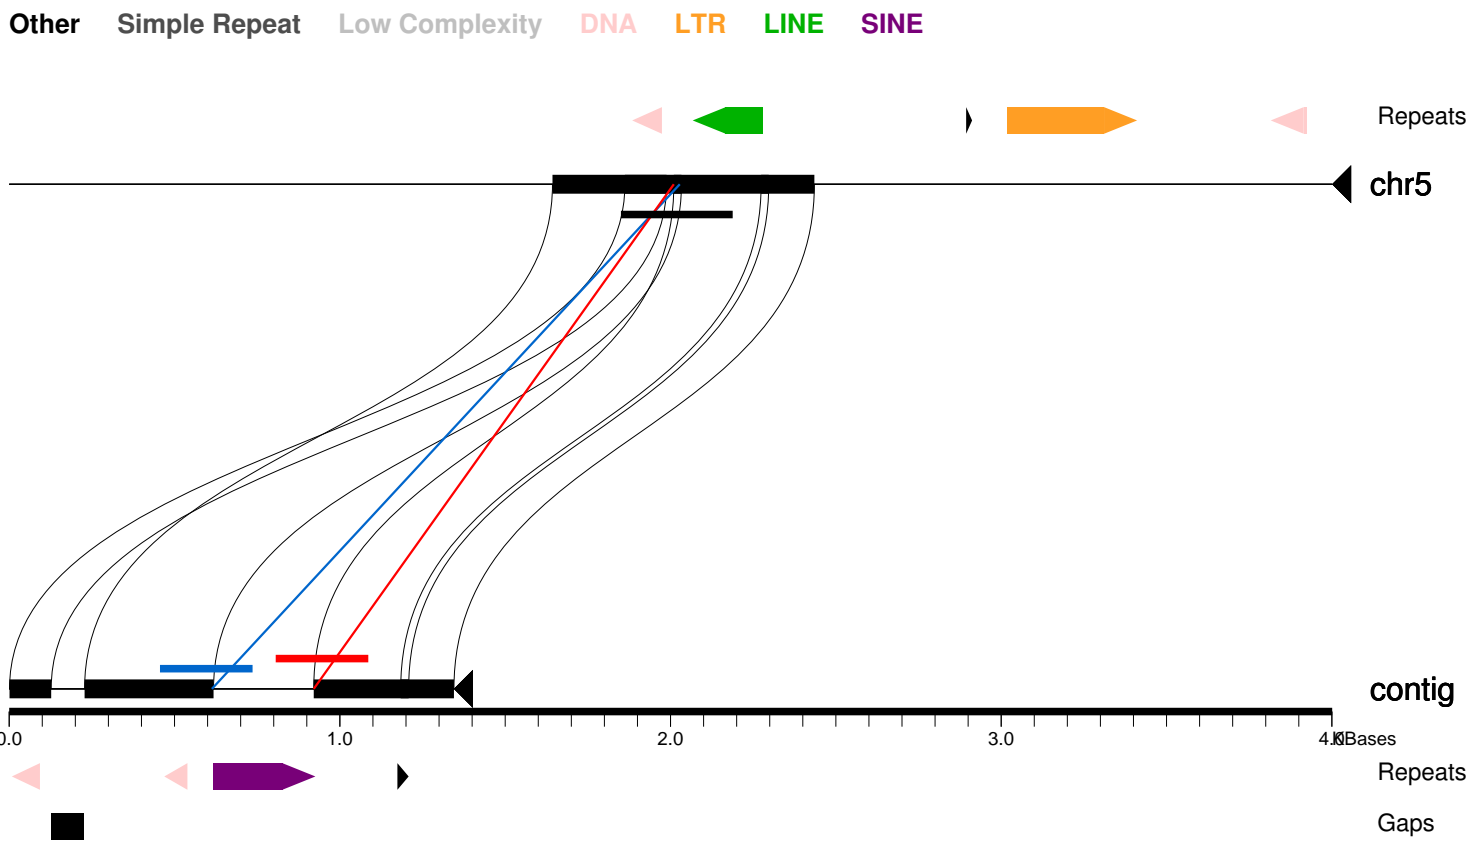



siteID: chr5\_10422812 Scaffitig4 - Breakpoint: chr5:10422828

chr5:10422786-10422887

Overlap Length: 18 INS size: 299 Genotyped: Yes

```
left  CC-----CCAT--TTGAAGA-AGATC----CTTAGAAT--AACCAATCAAACCAGTAAAGAAATGGG
chrom CC-----CCAT--TTGAAGA-AGATC----CTTAGAAT--AACCAATCAAACCAGTAAAGAAATGGG
right CCACTGCACTCCAGCCTGGGCGACAGAGCGAGACTCCGTCTCAAAAAAAAAAAAAAAAAAAAAAAAGAAATGGG
      **111111111***111*1*11**1***1*1111**11*11*11**11*11***11*11*****
```

```
left  AACATTGAGGCCGGGCGCGGTGGCTCACGCCTGTAATCCCAGCACTTTGGGAGGCCGAGGCGGGCG
chrom AACATTG-----GCCTCAAGATGGTAGACAGTGAA---GAGGAGAATTAACAATCTG
right AACATTG-----GCCTCAAGATGGTAGACAGTGAA---GAGGAGAATTAACAATCTG
      *****22222222222222*2*****2*222***22*222*2*22222*****2222*2222222*
```

Other Simple Repeat Low Complexity DNA LTR LINE SINE

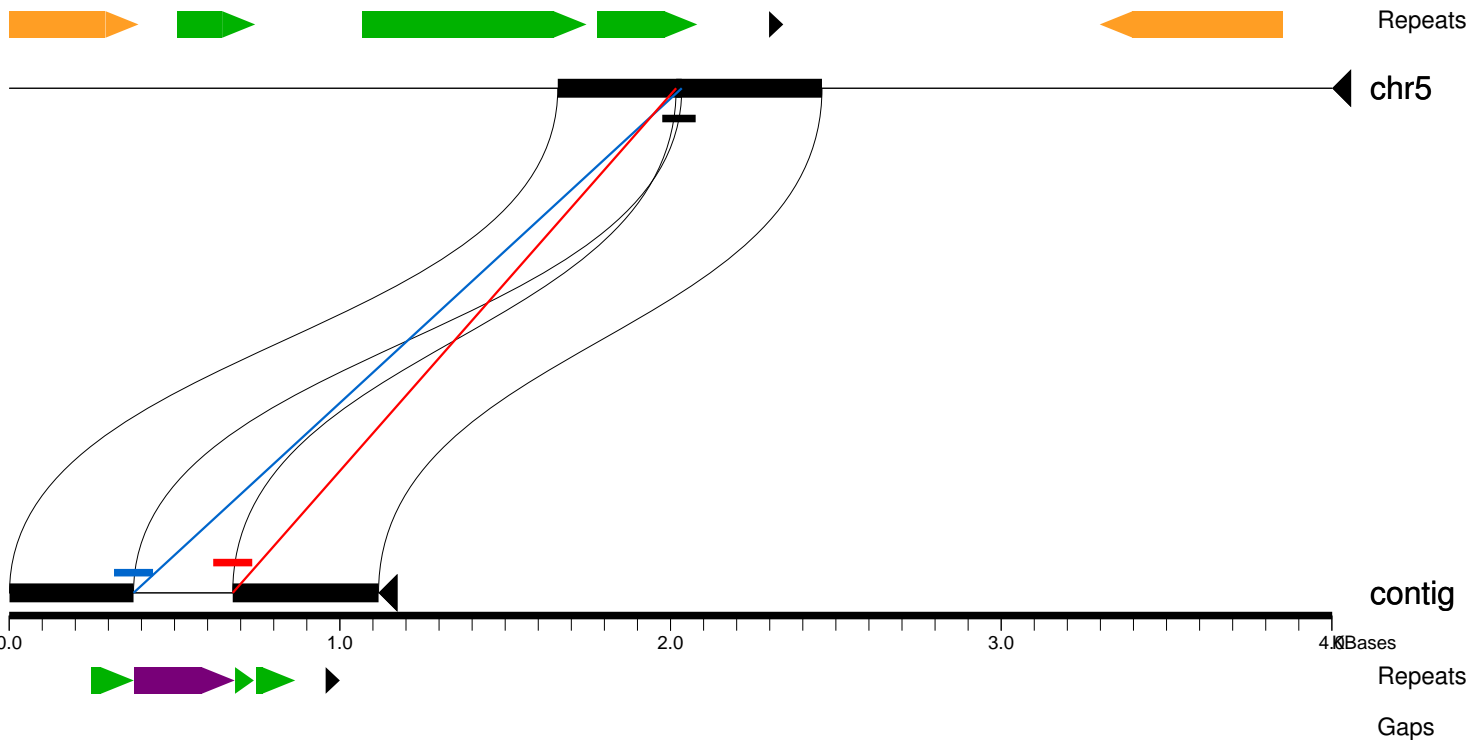



siteID: chr5\_104650891 Scafftig3 + Breakpoint: chr5:104650862

chr5:104650702-104651035

Overlap Length: 14 INS size: 301 Genotyped: Yes

```
left      T-----AGTTGTTACTGAAAGTGACATCCTTTTTAATTCATTTTTAGTAATTTAAATTTGTTTTTTT
chrom     TTGGAATATAGTTGTTACTGAAAGTGACATCCTTTTTAATTCATTTTTAGTAATTTAAATTTGTTTTTTT
right     TT-----TAGTAGAGACGGG--GTTTCACC-----TTGTTAGCCAGG---ATGGTCTCGAT
*2        2***1*11**1*111**11**1*1111111111111**1****11*11111**1**1*111*
```

```
left      TTTGTTAGTATAGCTAAATATTTGTCTATTTTATTATATTTTGAAGGAATAAACTCTTGGTTTTACTGAT
chrom     TT-GTTAGTATAGCTAAATATTTGTCTATTTTATTATATTTTGAAGGAATAAACTCTTGGTTTTACTGAT
right     CT-CCTG----ACCTCATGATCCACCCGCTCGGCCTCCC-----AAAGTGCTGGGATTACAGGC
1*211*11111*1**1*11**1111*1111*11111*1111111111111***1*11**11****1*11
```

```
left      ACTCTTCTACTGGTTTTATGTTATTTCAATTTATT-----TTTTTTTTTTTTTTGA-----GAC
chrom     ACTCTTCTACTGGTTTTATGTTATTTCAATTTATTCTACTTTGTTCTTTATTGTTTTCTTTCTTATGAC
right     G-TGAGCCACCGCGCCCGCCCTATTTCAATTTATTTCTACTTTGTTCTTTATTGTTTTCTTTCTTATGAC
11*111*1**1*1111111111******2222***2**2***2***2222222222222222***
```

```
left      G----GAG-TC---TCGCTCG-----TC--GCC--CAGGTCGGACTGCGGACTGCAG-TGGCGC--AAT
chrom     TTTTAGAGATCAGTTTGCTCTTCTTTTTCCAGCCATCTGCTTAGATTATTAATTTGAGATGGTTCTGAAT
right     TTTTAGAGATCAGTTTGCTCTTCTTTTTCCAGCCATCTGCTTAGATTATTAATTTGAGATGGTTCTGAAT
22222***2**222*2*****222222**22***22*2*22**2*2222*2*22**2***22*22***
```

```
left      -----CTCGGCTC-ACTGCAAGCTCCGCTTCCCGGTTTCACGCCATTCTCCT-
chrom     TATTATTACTTTTTTCTAGTTTAAACTTTTTATTTTAGA-TTCAAGAGATAACATTTG
right     TATTATTACTTTTTTCTAGTTTAAACTTTTTATTTTAGA-TTC-----
22222222**2222*2*2*22**2**2222**222*22***1N1NN1N1NNN1
```

Other Simple Repeat Low Complexity DNA LTR LINE SINE

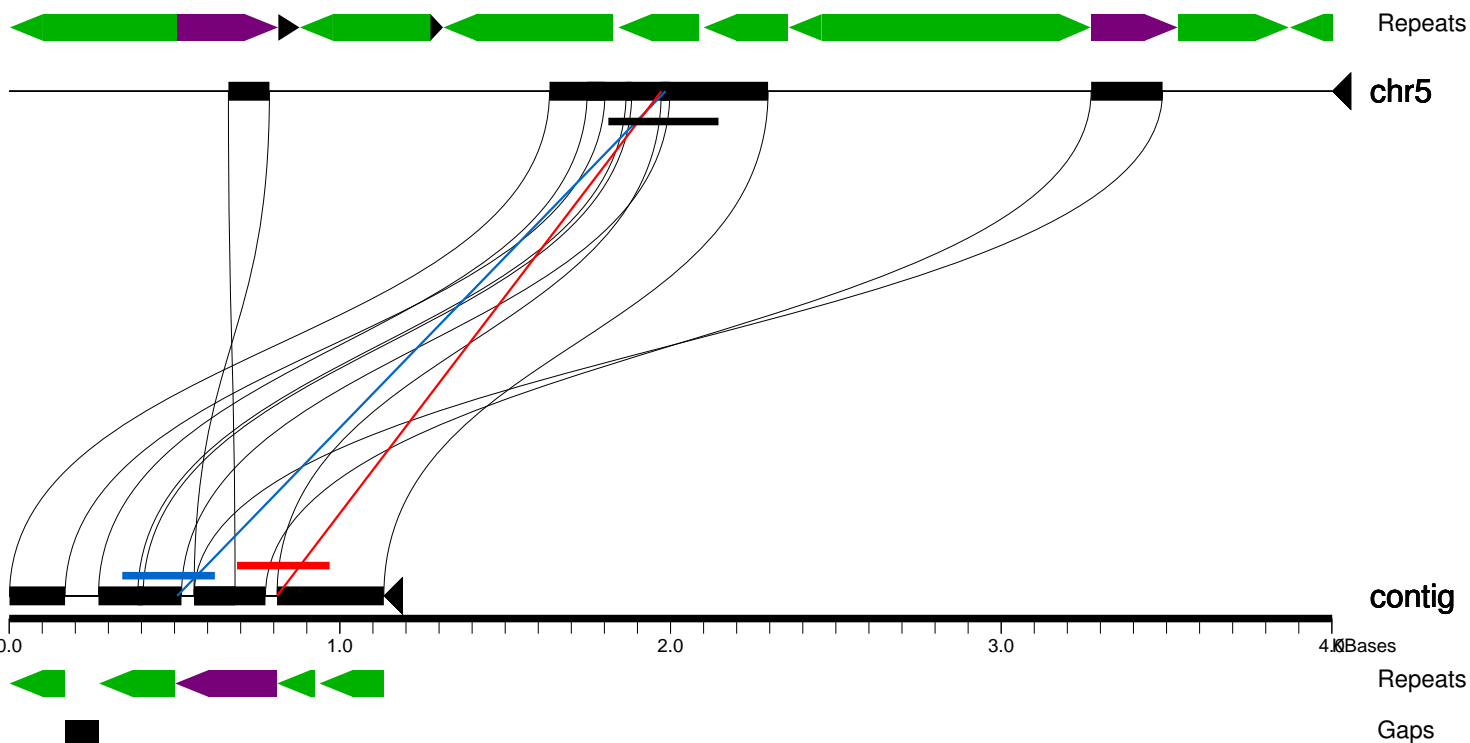



siteID: chr5\_106735995 Scafftig2 + Breakpoint: chr5:106736005  
chr5:106735955-106736064  
Overlap Length: 10 INS size: 424 Genotyped: No

```

left      TAA-----ATTGAAATTTTGTAGAAAGATTTAAAAAATGTATAACTTCAATAAG--TCAAATA
chrom     TAA-----ATTTGAAATTTTGTAGAAAGATTTAAAAAATGTATAACTTCAATAAG--TCAAATA
right     CCGCCCGCCTCGGCCTCCCAAAGTGCTGGGA----TTACAGGCGTGAGCCACCGCGCCCGGCCTCAAATA
          1111111111111111*111***1*11*1*1*1111***1*1111**1111**11*11111*11*****

left      TCAAAAAAAAAAAAAAAAAAAAAAAAAAAAAAAAAAAAAAAAAAAAAAAAAAAAAAAAAAA
chrom     TCAAAAAAAAAAAGCGTAAAAATTTAAATAAACATTTTACAGATAAAAAACCCACCCCT-----
right     TCAAAATTTTAAGCGTAAAAATTTAAATAAACATTTTACAGATAAAAAACCCACCCCT-----
          **222222222222222222222222222222222222222222222222222222222222222222
  
```

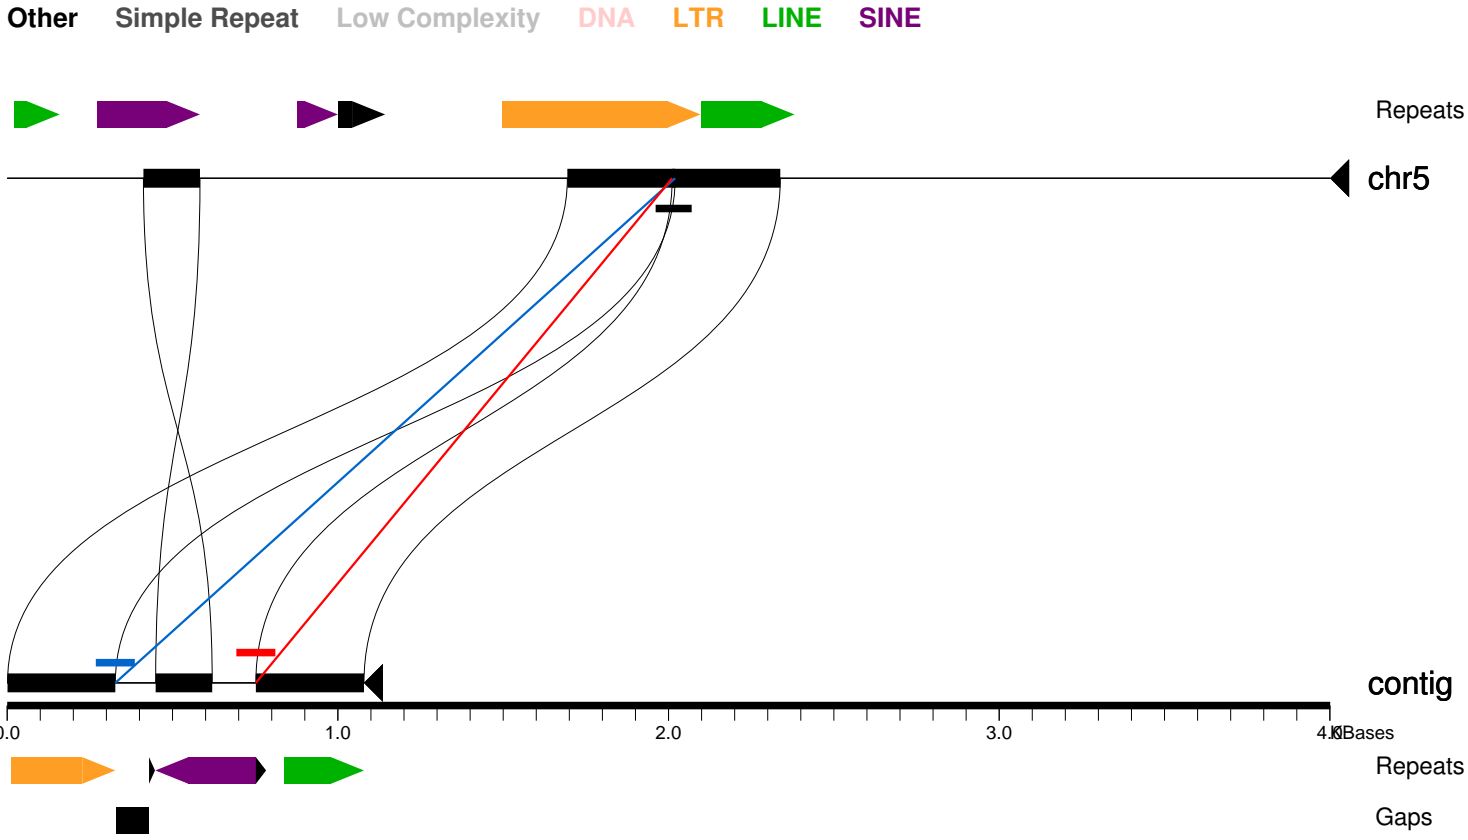

siteID: chr5\_108026592 Scafftig2 + Breakpoint: chr5:108026582

chr5:108026422-108026755

Overlap Length: 14 INS size: 296 Genotyped: Yes

```
left  A-----CAGGCATGAGCCACTGTGCCTGGCCAATGTTCTTTATATTTATTTGCCAATTTATT
chrom AAGTGCTGG-GATTACAGGCATGAGCCACTGTGCCTGGCCAATGTTCTTTATATTTATTTGCCAATTTATT
right TGAGGCAGGAGAAT---GGCGTGAACCCGGGAGGCGGAGC-----TTGCAGTGA--GCCGAG--ATC
      1NNN22N22122N2 11***1***1**111*1*1*11*11111111**11*1*1*11***1*111**1
```

```
left  CTGAGAAAAGTCTGCATCAATTTACATTTCCCATGAGCAGTATAT-GAGGGACCATTTCAATGTATCTTTAC
chrom CTGAGAAAAGTCTGCATCAATTTACATTTCCCATGAGCAGTATAT-GAGGGACCATTTCAATGTATCTTTAC
right CCGCCA----CTGCAC-----TCCAGCC---TGGGCGACAGAGCGAGACTCCGTCTCAA-----AA
      *1*11*1111*****111111*1**11*111**1**111*1*11**111**1*1***11111111*1
```

```
left  CAGCATCAAGTATTATCTTCTTAAACTTTTATTGGCCAGGCGGGTGGCTCACG---CCTGTAGTCCC
chrom CAGCATCAAGTATTATCTTCTTAAACTTTTATTGGATATGATAAAAGAAATAATAGTACCATGTTGTGAT
right AAAAAAAAAAAAAA-----AAAAATTTTATTGATATGATAAAAGAAATAATAGTACCATGTTGTGAT
      1*11*11**11*11111111111*1***1*****2222*22222*22222222*222*2***2**222
```

```
left  AGCACTTTGGGAGGCCGAGGCGGGCGGATCACG-----AG-----GTCAGG-AGATTGAG
chrom ATAAGTTTGAATTTTTGTTGAGGGTTGACCATATTTTTATATATAGTATTTATTAGTCATTTATATTTAG
right ATAAGTTTGAATTTTTGTTGAGGGTTACCATATTTTTATATATAGTATTTATTAGTCATTTGTATTTAG
      *22*2****2222222*22*2***221*2**222222222222**222222222****22212***2**
```

```
left  AC-----CATCTGGCT--AAAAC---GGTGAACCCCGTC-TCTACTAAA--
chrom TCATCTATACATTTTCTATTCATATCCTTGGCTGATTTTTCTTAGTTTTGTTAAGT
right TCATCTATACATTTTCTATTCATATCCTTGGCTGATTTTTCTTAGTT-----
      2*2222222***22*222*22*2*2222*2***22222*2*22*21NN1N11
```

Other Simple Repeat Low Complexity DNA LTR LINE SINE

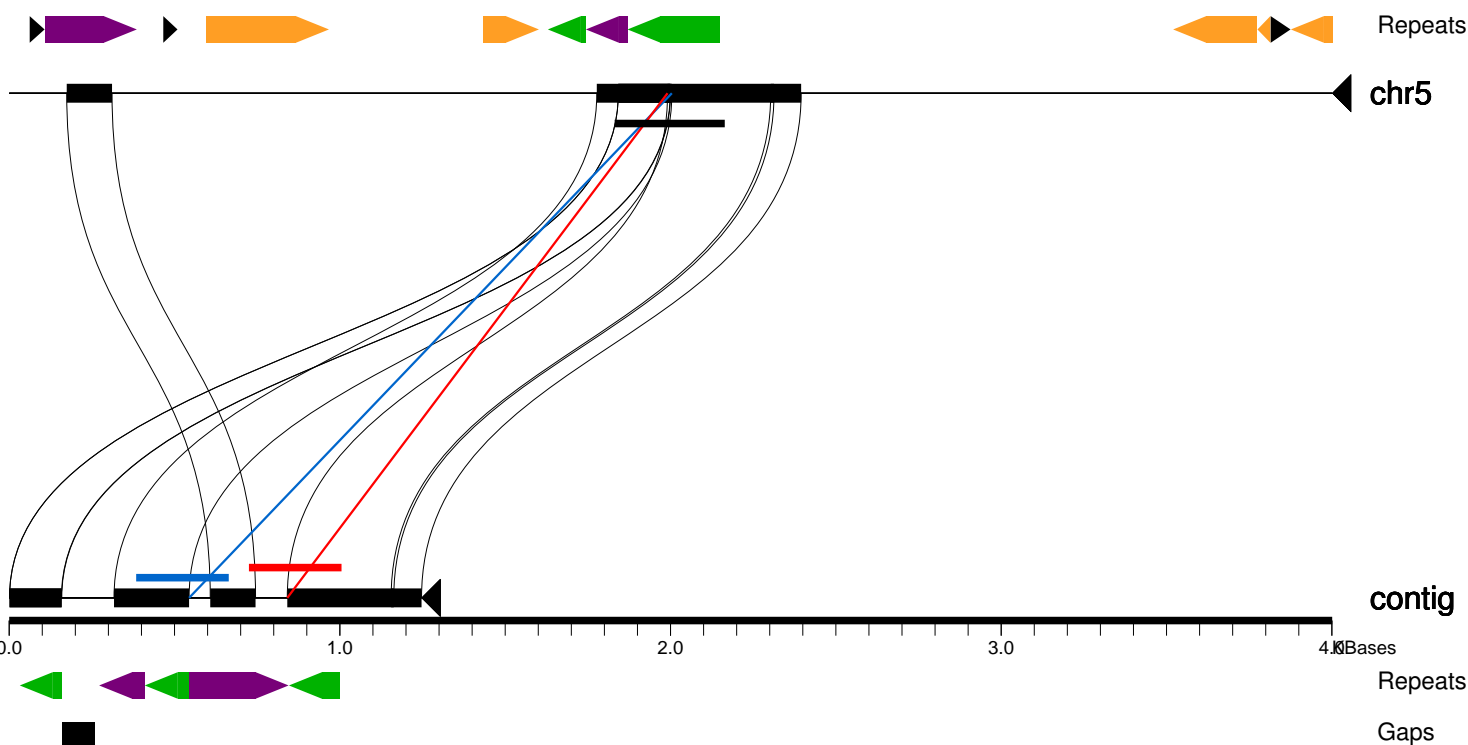

siteID: chr5\_109050998 Scafftig1 + Breakpoint: chr5:109050994

chr5:109050834-109051164

Overlap Length: 11 INS size: 311 Genotyped: Yes

```
left CT---AACACATCCTCCTGCCAGCTTGTTCACAAAGATTTGTCAGCTTATCCTTGAGAAGATTTTATTT
chrom CTGCTAACACATCCTCCTGCCAGCTTGTTCACAAAGATTTGTCAGCTTATCCTTGAGAAGATTTTATTT
right TT--TAGTAGAGACGGGGTTTCACCTTGTTCAGCCAGGATG-GTCTCGATCTCCT-----GACCTCATG-
1* 2*11*1*11*11111111**1*****11*1*1***11***1111*1*****111111**11*1**11
```

```
left TATTTATTAAACTCATATATTCATAGGGAGATAAAATATTATTGGCTTAAAATACTTTGTATTGACTTTC
chrom TATTTATTAAACTCATATATTCATAGGGAGATAAAATATTATTGGCTTAAAATACTTTGTATTGACTTTC
right -ATCCACCCGCTCGGCC-TCCCAAAGTGCTGGGA---TTACAGGCGTGAGCCACCCGCGCC-----
1**11*111111***111111*1***1**1*111111*111***11***1*1*111**111*111111111111
```

```
left ATATAATTTGTTTGGCCTTTAAATTTTTTTTGT-----TTTTTG-----TTTTT-----TTTT
chrom ATATAATTTGTTTGGCCTTTAAATTTTTTTTATAACTTATATTTGGATGTGATTTTTTGCAGTCTAGTTTT
right -----GGCCT--AAATTTTTTTTATAACTTATATTTGGATGTGATTTTTTGCAGTCTAGTTTT
11111111111111111111*****11******11*2*222222*2***22222222*****2222222222****
```

```
left -----TTTTTGAGACGGA-GTCTCGCTCTGTCGCC-CAGGCCA-----GACTGCGGAC
chrom AACATAATTTAAATTTTACAAAAGGTTGTTTGGTTGTGTTGTCACATTTAATATTATAGAGACTATGAAG
right AACATAATTTAAATTTTACAAAAGGTTGTTTGGTTGTGTTGTCACATTTAATATTATAGAGACTATGAAG
22222222222222222222****22*2*2**22**2*2*2*2***2*2*2**2222*2222222222****22*2*2
```

```
left TGCAGTGGCGCAATCTCGGCTCACTGCA-AGCTCCGCTTCCCGGGTTCACG
chrom AACAAAAGTAAAAGTTTTAGTTTTTTTCCACCGTTTTTTTCCATCCC
right AACAAAAGTAAAAGTTTTAGTTTTTTTCCACCGTTTTTTT-----
22*222*222*2*2*22*2*22*2*22*2*22*2*2222*11NNN1NNNN1N
```

Other Simple Repeat Low Complexity DNA LTR LINE SINE

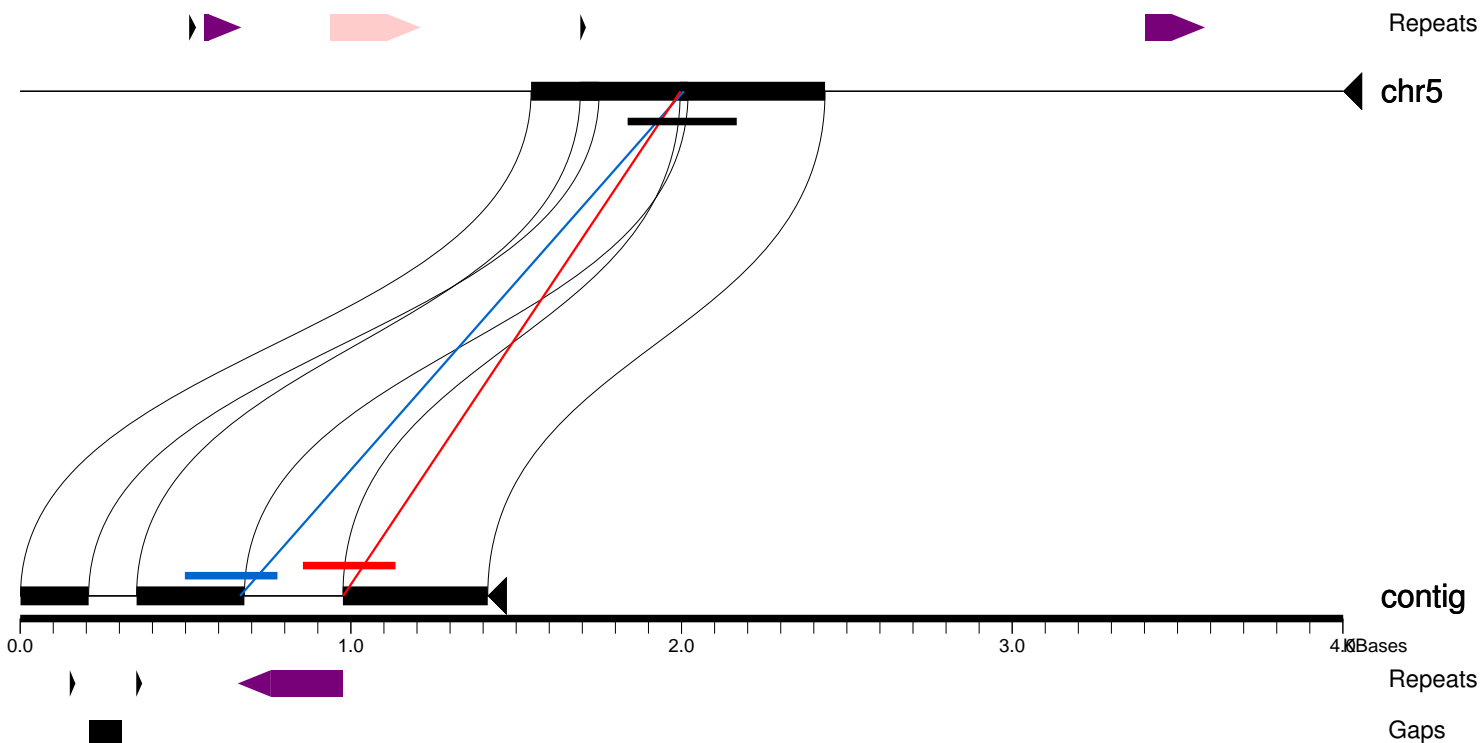

siteID: chr5\_109245961 Scaffitig3 + Breakpoint: chr5:109245949

chr5:109245904-109246008

Overlap Length: 15 INS size: 342 Genotyped: No

```

left    GC-----TCTTTGC-----AATTCCTGT--TCCTCTGCCTGAAGTTTCTCTTCCAG--ATTTTGAAGG
chrom   GC-----TCTTTGC-----AATTCCTGT--TCCTCTGCCTGAAGTTTCTCTTCCAG--ATTTTGAAGG
right   CCGCCCGCCTCGGCCTCCC AAAAGTGTGGATTACAG-GCGTGAGCCACCGCGCCCGGCAATTTTGAAGG
        1*1111111**11**1111111**1*1***111**1*111**1***111111*1*11**1*11*****
left    ATTTTNNNNNNNNNNNNNNNNNNNNNNNNNNNNNNNNNNNNNNNNNNNNNNNNNNNNNNNNNNNNNNNNNNNNNNNNNN
chrom   ATTTT-----ATCCAGAGTCCTTCCCTGAGCATCTGACCTAAAATGGTCCTTGTAG
right   ATTTT-----ATCCAGAGTCCTTCCCTGACCATCTGACCTAAAATGGTCCTTGTAG
        ****222222222222222222222222222222222222N22222222222222222222222222222222

```

Other   Simple Repeat   Low Complexity   DNA   LTR   LINE   SINE

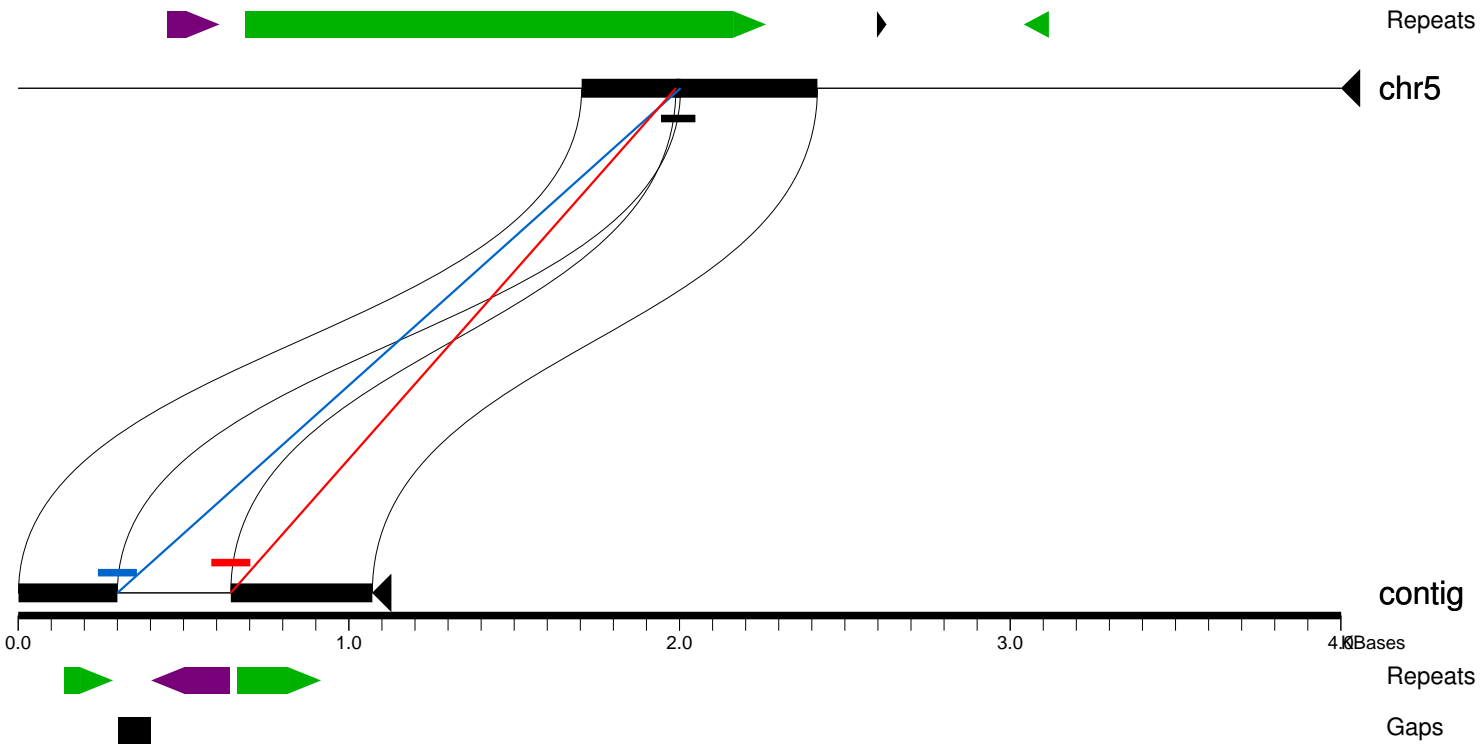



siteID: chr5\_111658667 Scafftig4 - Breakpoint: chr5:111658677

chr5:111658631-111658721

Overlap Length: 14 INS size: 305 Genotyped: Yes

```
left  AGGTAAAGGGGGAAAAG-----GTAATGGGGAC-----TTTCAAGAAGATAACAATTA-----
chrom AGGTAAAGGGGGAAAAG-----GTAATGGGGAC-----TTTCAAGAAGATAACAATTA-----
right CGAGATTGCGCCACTGCACTCCAGCCTGGGCGACAGCGAGACTCCGTCTCAAAAAAAAAAAAAAAAAAAAAA
      1*11*11*1*11*11*1111111*1111**1***111111111111*1****1**1*1*1**11*11111
```

```
left  ----GAAGACAAGAAAAGGTGGCCGGGCGCGGTGGCTCACGCC-TGTAATCCCAGCACTTTGGGAGGCCGA
chrom ----GAAGACAAGAAAAGGC-----TTTCTAAAGCTATTTGATTTCTGAAATTAA-----
right AAAAGAAGACAAGAAAAGGC-----TTTCTAAAGCTATTTGATTTCTGAAATTAA-----
      1111*****222222222222*22**2*2**22*2*2**22*2*2**22222222222
```

```
left  GCGGGGCG
chrom -----
right -----
      22222222
```

Other Simple Repeat Low Complexity DNA LTR LINE SINE

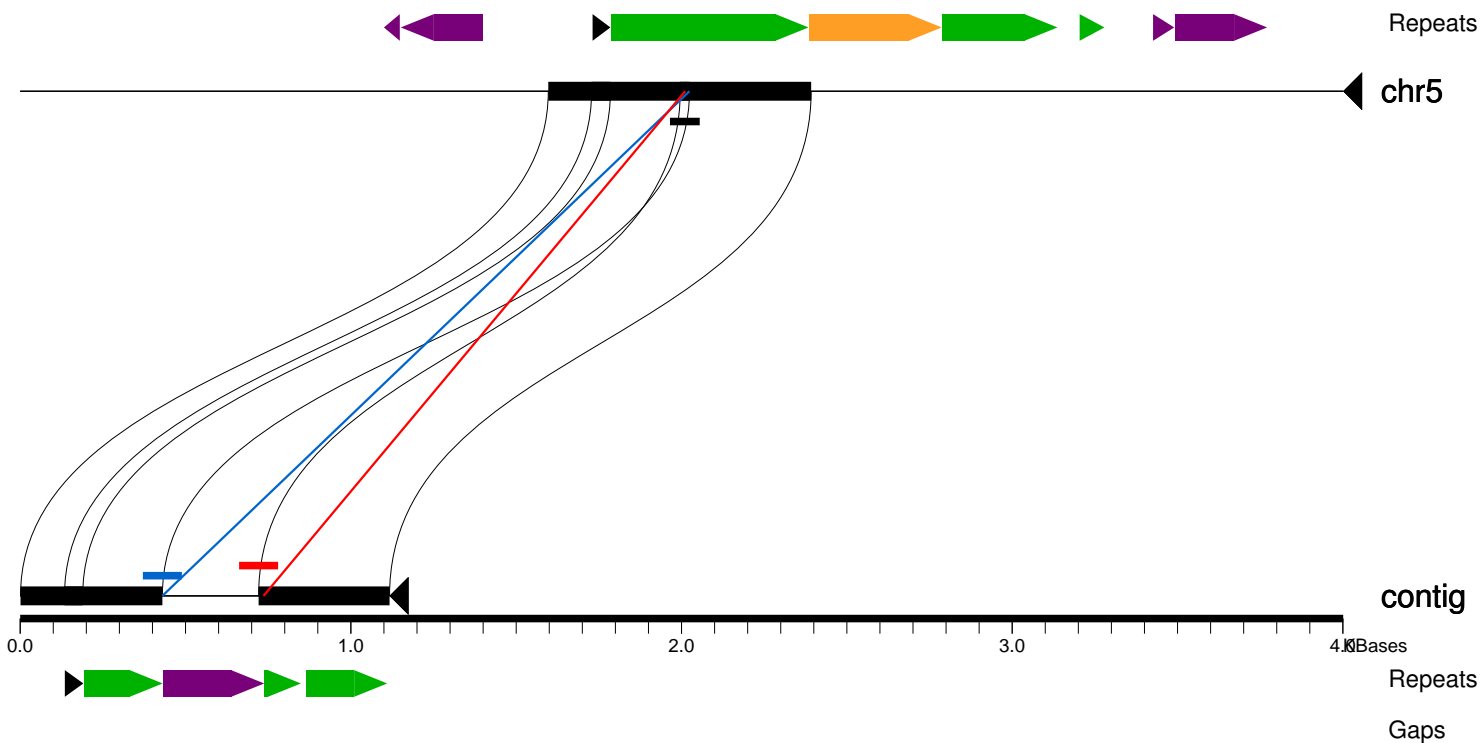



siteID: chr5\_114739742 Scafftig9 + Breakpoint: chr5:114739723

chr5:114739677-114739782

Overlap Length: 14 INS size: 267 Genotyped: Yes

```
left  TTCTCT-----TTTGGATC-----TAGGTGTGC-AATATGCCTTGATGAATGACAATTAGAATGT
chrom TTCTCT-----TTTGGATC-----TAGGTGTGC-AATATGCCTTGATGAATGACAATTAGAATGT
right CGATCTCCTGACCTCGTGATCCGCCCCGCTCGGCCTCCCAAAGTGCTGGGATTACAGGC---TAGAATGT
      111***1111111*11*****11111111*1**11*1*1**11***111***1*11*1*111*****
```

```
left  TTTTTTTTTTTTTGAGACGGAGTCTCGCTGTCGCCAGGCTGGAGTGCAGTGGCGCAATCTCGGC
chrom TTTTTTA-----AAGCAGCATCAATAA----AATAATATTGTGACACTACATAAAAATAAGC
right TTTTTTA-----AAGCAGCATCAATAA----AATAATATTGTGACACTACATAAAAATAAGC
      *****2222222222*2*2**22*22*2222222*222*222***222222*22**22*22**
```

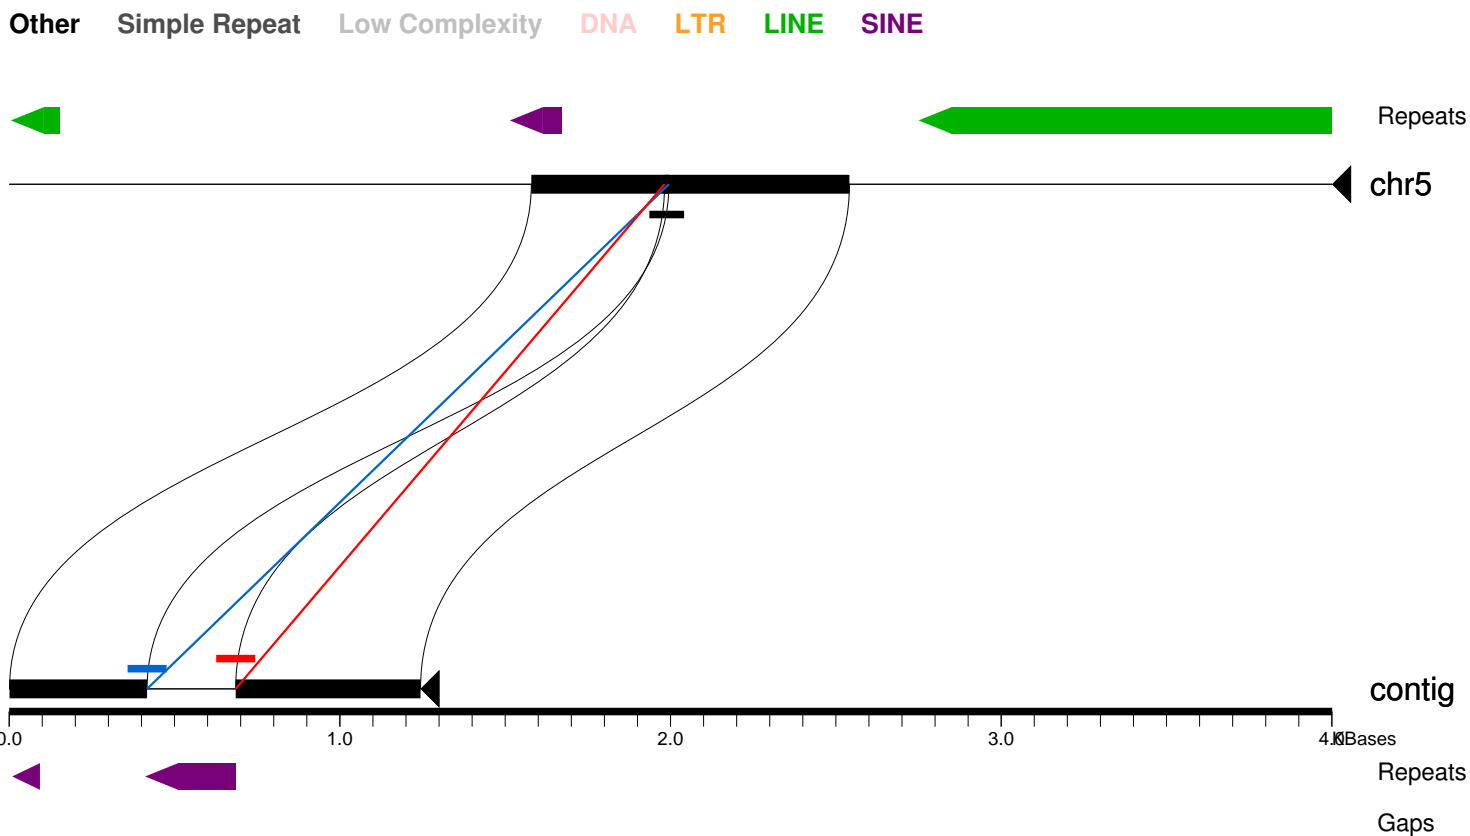

siteID: chr5\_117951770 Scafftig1 + Breakpoint: chr5:117951768

chr5:117951723-117951827

Overlap Length: 15 INS size: 299 Genotyped: Yes

```
left  AAG-TCACATG-----CCAGCAT--GAATTATAAAAT-----ATTGTGGGGTAGGATCAGGCACC
chrom AAG-TCACATC-----CCAGCAT--GAATTATAAAAT-----ATTGTGGGGTAGGATCAGGCACC
right CTCCTGACCTCGTGATCCGCCCGCCTCGGCCTCCCAAAGTGCTGGGATTACAGGCGT--GA-CAGGCACC
      1111*1**1*2111111111**1**1*11*11*111***1*111111***111**1**11**1*****
```

```
left  ACTTTTFFFFFFFFFFFFFFFFFFFFFFFFFFFFFFFFFFFFFFFFGGAGACGGAGTCTCGCTCTGTCGCCC
chrom ACTTTTAAACAACCACTTGGCTCCCAAGTGATTCTA-----AAATATAGCCAAGAT-----
right ACTTTTAAACAACCACTTGGCTCCCAAGTGATTCTA-----AAATATAGCCAAGAT-----
      *****2222222222**222*222222*22**2*222222*2*222**2*22*2*222222222
```

Other Simple Repeat Low Complexity DNA LTR LINE SINE

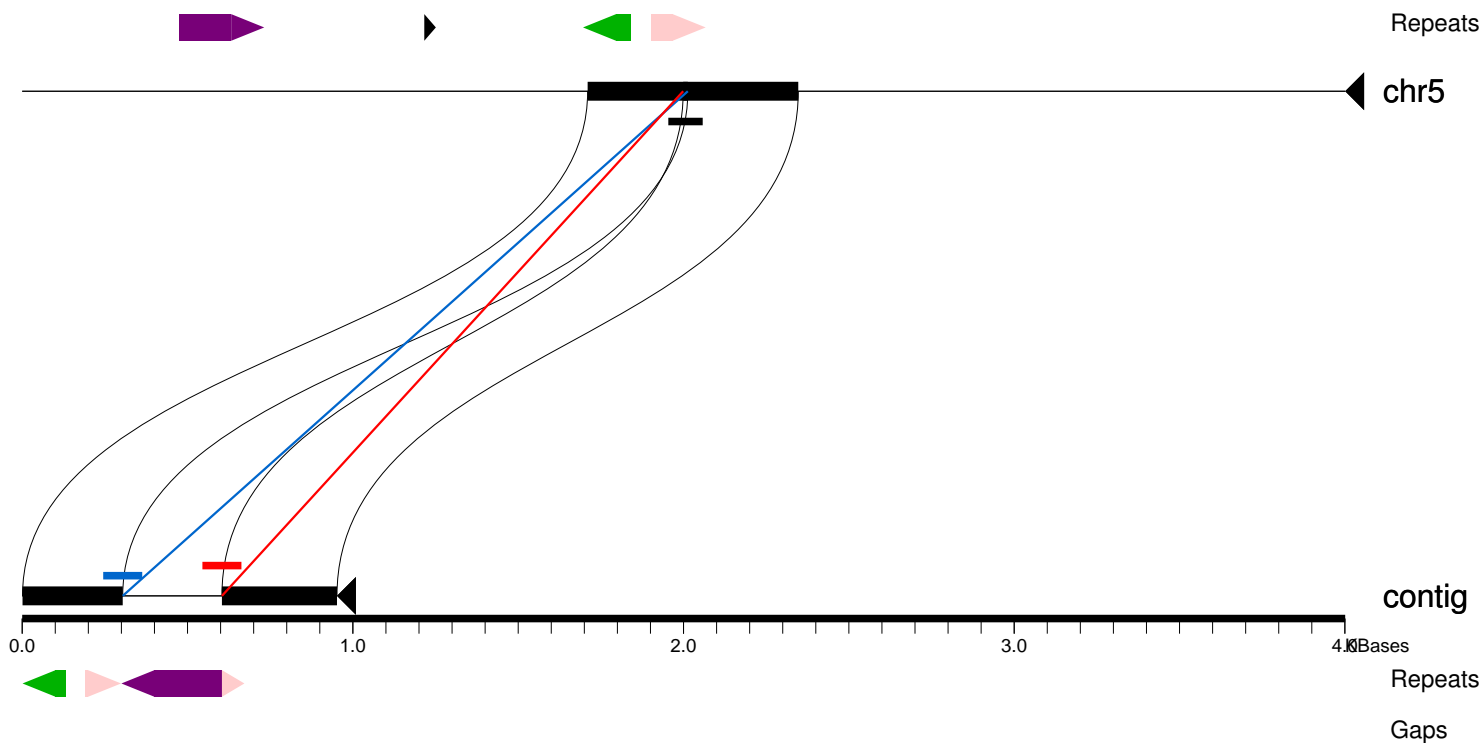

siteID: chr5\_118977634 Scafftig6 - Breakpoint: chr5:118977626

chr5:118977576-118977724

Overlap Length: 10 INS size: 302 Genotyped: Yes

```
left  TATTCATGAAGAAATTTAGTTCATTATAGTGCATCTTATATACTTTTAAAACTCATGATGGCCGGGCGC
chrom TATTCATGAAGAAATTTAGTTCATTATAGTGCATCTTATATACTTTTAAACTCATGATAACTGTTTTT
right AAAAAAAAAAAAAAAAAA-----AAAAAC-----AACTCATGATAACTGTTTTT
      1*1111*11**1***11111N11111111111111111111*1*1**111111******22*2*22222
```

```
left  GGT-----GGCTCACGCCTGTAATCCCAGCACTTTGGGAG-----GCCGAGG-C
chrom CATAcATTTTTAGGACTACccccccccccccCACACAGAGGTAActAATATAAAAAGATCTGCATATATC
right CATAcATTTTTAGGACTACcccccccc-ACccccCACACAGAGGTAActAATATAAAAAGATCTGCATATATC
      22*2222222222*2**22*2**222N*2***22***222**2*2222222222222222**22*222*
```

```
left  GGTG---G
chrom CAGTCCATG
right CAGTCCATG
      22**2222*
```

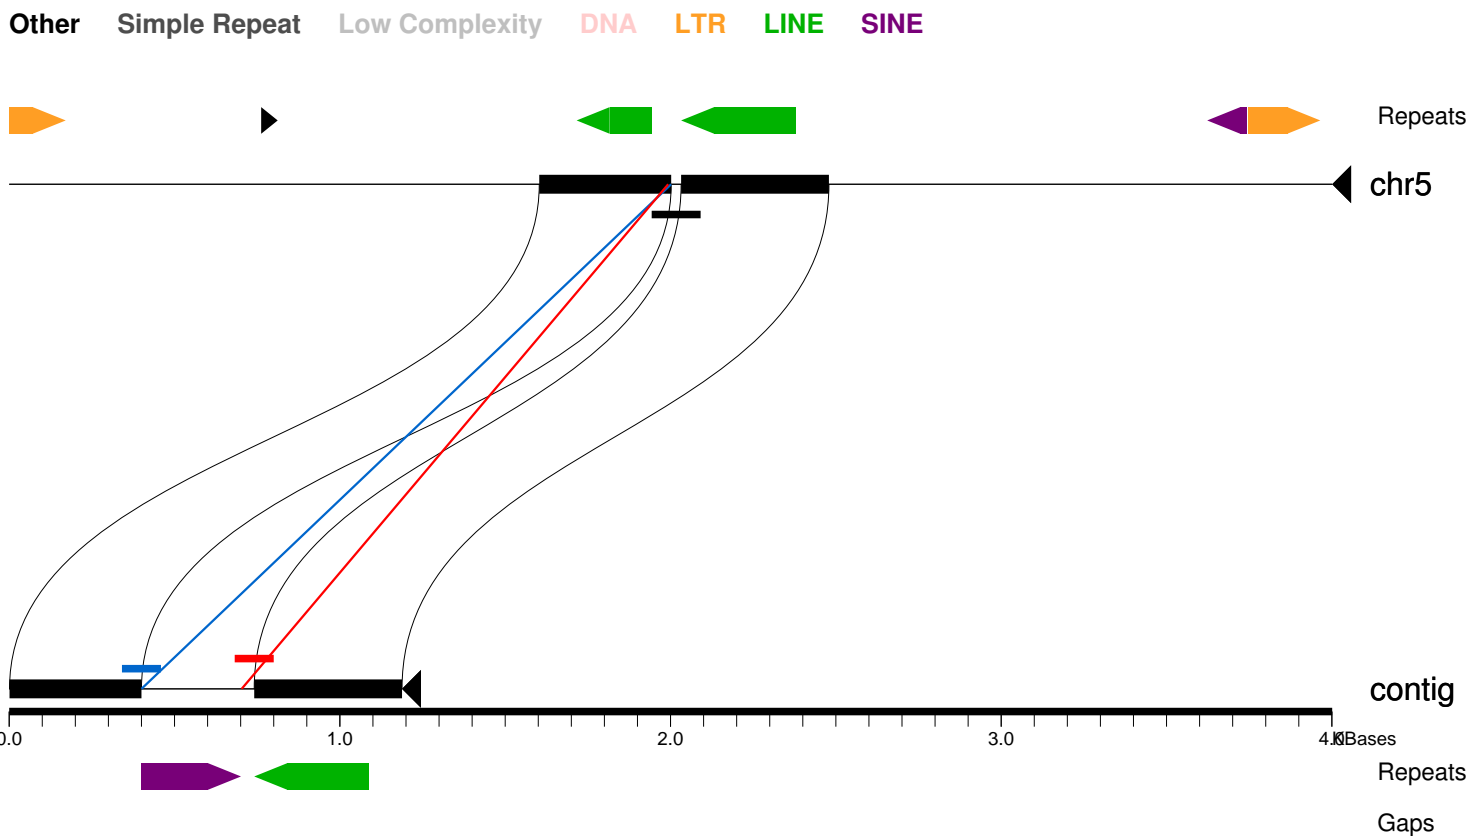





siteID: chr5\_119485627 Scafftig1 - Breakpoint: chr5:119485618

chr5:119485559-119485674

Overlap Length: 1 INS size: 268 Genotyped: No

```
left  TGACACAAGTTTATCTGTATAACAGACCTG--TACA----TGTACCCCTGAACTTAAAAAAAAAAAAAANNN
chrom TGACACAAGTTTATCTGTATAACAGACCTG--TACA----TGTACCCCTGAACTTAAAAAAAAAAAAA---C
right CCGCCCGCCTCGGCCTCCCAAAGTGCTGGGATTACAGGCGTGAGCCACCGCGCCCGCCAAAAR-----C
      111*1*111*1111**1111**11*1111*11****1111**11*1*11*111111***1112222
```

```
left  NNNNNNNNNNNNNNNNNNNNNNNNNNNNNNNNNNNNNNNNNNNNNNNNNNNNNNNNNNNNNNNNNNNNNNNNN
chrom ATTTATTTTCTGTGCAGAGTGAGTGTTGCTATTAATTATGACTTGATGAGTTTTTC
right ATTTATTTTCTGTGCAGAGTGAGTGTTGCTATTAATTATGACTTGATGAGTTTTTC
      22222222222222222222222222222222222222222222222222222222222222222222
```

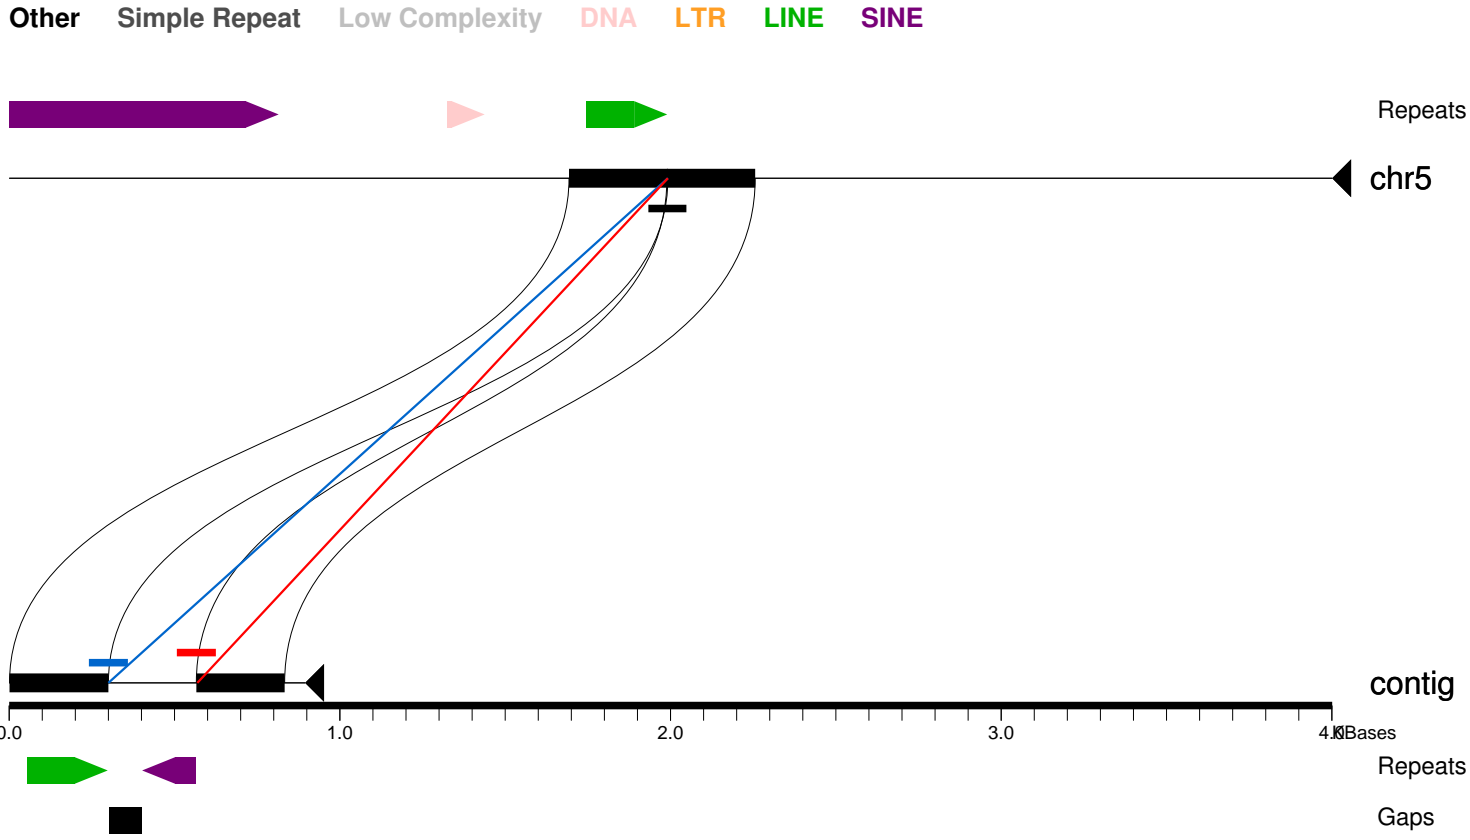

siteID: chr5\_124147832 Scafftig15 - Breakpoint: chr5:124147815

chr5:124147765-124147874

Overlap Length: 10 INS size: 298 Genotyped: Yes

```
left   AAA--GC-----CTTATGACAAATTTCAAGAGAATAGCTATTTTACCTTACATTATTAATAATTTTGG
chrom  AAA--GC-----CTTATGACAAATTTCAAGAGAATAGCTATTTTACCTTACATTATTAATAATTTTGA
right  CCACTGCACTCCAGCCTGGGCGACAGAGCGAGACTCCGTCTCAAAAAAAAAAAAAAAAAAAAAATAATTTTGA
      11*11**11111111*1*11*11*1*111*1***111111**11111*1111*1*11*11*11*****2
```

```
left   GCCGGGCGCGGTGGCTCAC--GCCTGTAATCCCAGC-ACTTTGG-GAGGCCGAGGCGGGCGG
chrom  T-----GTATATTACTAGAAATTTTGTGTATCTACTTTGTTGAA----AATTGTACCC
right  T-----GTATATTACTAGAAATTTTGTGTATCTACTTTGTTGAA----AATTGTACCC
      2222222222**222*2**22*22*2*22*222*2*2*****22**22222*222*22*22
```

Other    Simple Repeat    Low Complexity    DNA    LTR    LINE    SINE

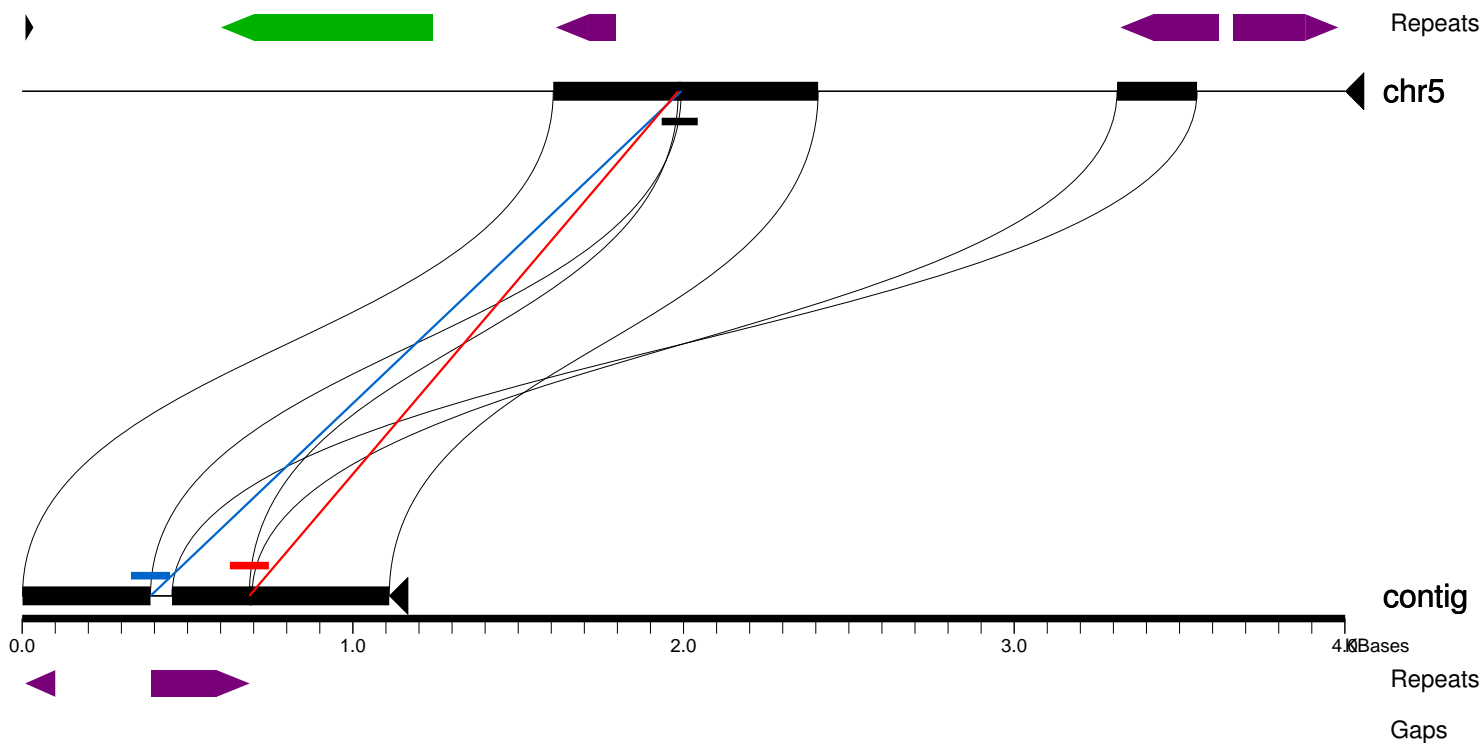

siteID: chr5\_126302175 Scaffitg1 - Breakpoint: chr5:126302163

chr5:126302111-126302222

Overlap Length: 8 INS size: 321 Genotyped: No

```
left   TCAGTTCCCTCCATCCCCCAAGAGTTTTCTGTATCCAATGCTTGTTCAGAA-----AGGATGTTN
chrom  TCAGTTCCCTCCATCCCCCAAGAGTTTTCTGTATCCAATGCTTGTTCAGAA-----AGGATGTTT
right  CCGCCCGCCTCGGCCTCCCAA-AGTGCTGGGATTACTG-GCGTGAGCCACCACGCCCGGCCAGGATGTTT
      1*111111****111*1*****1***11*11*11*1*111**1**111**11*1111111111*****2
```

```
left   NNNNNNNNNNNNNNNNNNNNNNNNNNNNNNNNNNNNNNNNNNNNNNNNNNNNNNNNNNNNNNNNNNNNN
chrom  ATATCCTGTTATTTTTTCCTTAGTTGCAAGGTAGAATTTTGTATATAAATGT-----
right  ATATCCTGTTATTTTTTCCTTAGTTGCAAGGTAGAATTTTGTATATAAATGT-----
      222222222222222222222222222222222222222222222222222222222222222222
```

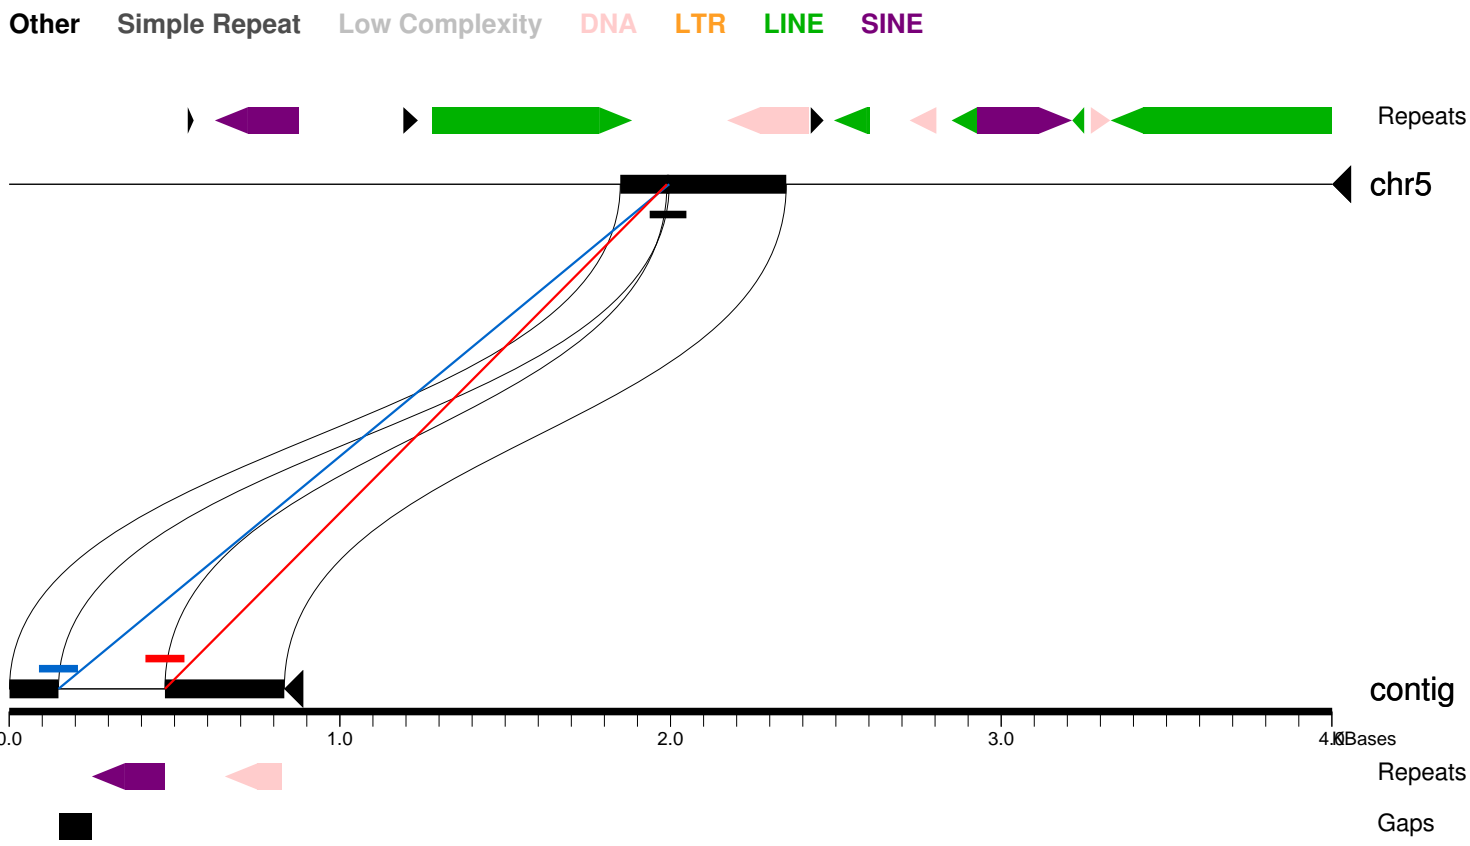



siteID: chr5\_128314860 Scaffoldig1 - Breakpoint: chr5:128314858

chr5:128314810-128314914

Overlap Length: 12 INS size: 312 Genotyped: Yes

```
left  ATCATTATTTTTTA-----ACTGCATAATGGCAGAGACAGCCACCCATAGTAAGAAGTCACT
chrom ATCATTATTTTTTA-----ACTGCATAATGGCAGAGACAGCCACCCATAGTAAGAAGTCACT
right GCAGTCCGGCCTGGGGCGACAGAGCGAGACTCCGTCTCAAAAAAAAAAAAAAAAAAAAAAAAAAAAGTCACT
      1111*111111*111111111111111111***1*1*111111*1*1*1*111*111*1*11**1*****
```

```
left  TTTGGCCGGGCGCGGTGGCTCACGCCTGTA-ATCCCAGCACTTTGGGAGGCCGAGGCGGGTGA-
chrom TTTG-----CTCAGGTCTCTTCATTTGAGATTTGTTGTATG--GAGGGAAACCCAC
right TTTG-----CTCAGGTCTCTTCATTTGAGATTTGTTGTATG--GAGGGAAACCCAC
      ***222222222222222222222222222222222222222222222222222222222222222222
```

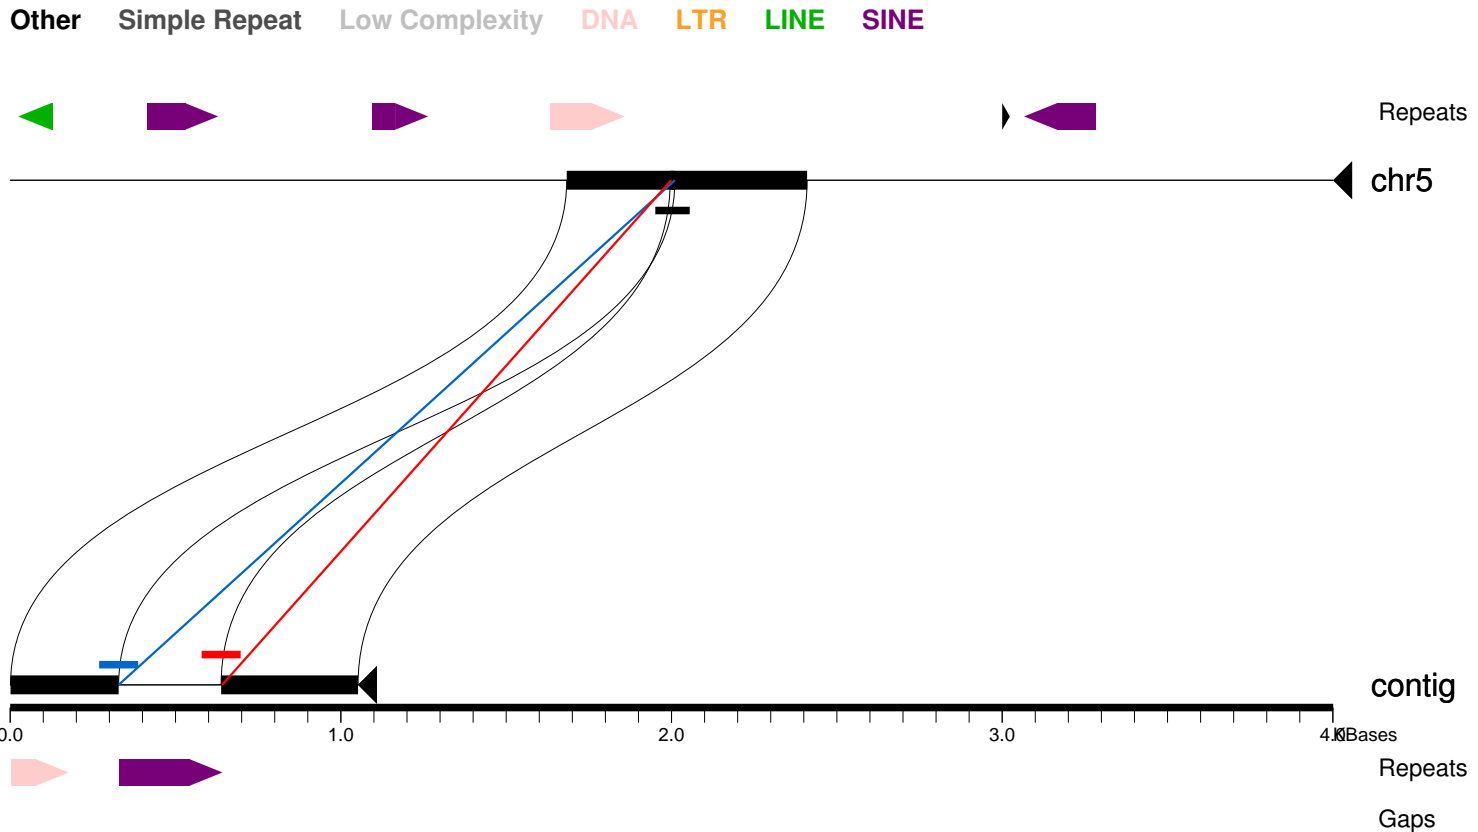

siteID: chr5\_130853236 Scafftig5 - Breakpoint: chr5:130853242

chr5:130853199-130853301

Overlap Length: 17 INS size: 315 Genotyped: Yes

```
left      TCA-----CAAGGCTTT-TCTTATGGTGTAAAGGCTAGGTGTTCACTTAAAAAATCTCT
chrom     TCA-----CAAGGCTTT-TCTTATGGTGTAAAGGCTAGGTGTTCACTTAAAAAATCTCT
right     CCGGCCTGGGCGACAGAGCAAGACTCCGTCTCAAAAAAAAAAAAAAAAAAAAAAAAAAAAAA
           1*11111111111111111111111111111111111111111111111111111111
           ****1**111**1*11111111***1111*11111111*111*****
```

```
left      CAAATGGGCCGGGCGCGGTGGCTCACGCCTGTAATCCCAGCACTTTGGGAGGCCGAGGCGGGTGG
chrom     CAAATG-----CTAAAATTCAAATAACTAGACAAATCACTTCAGCTATCCCAGG-----
right     CAAATG-----CTAAAATTCAAATAACTAGACAAATCACTTCAGCTATCCCAGG-----
           *****222222222*222222***222222**22*22*2*****22*2222*2***22222222
```

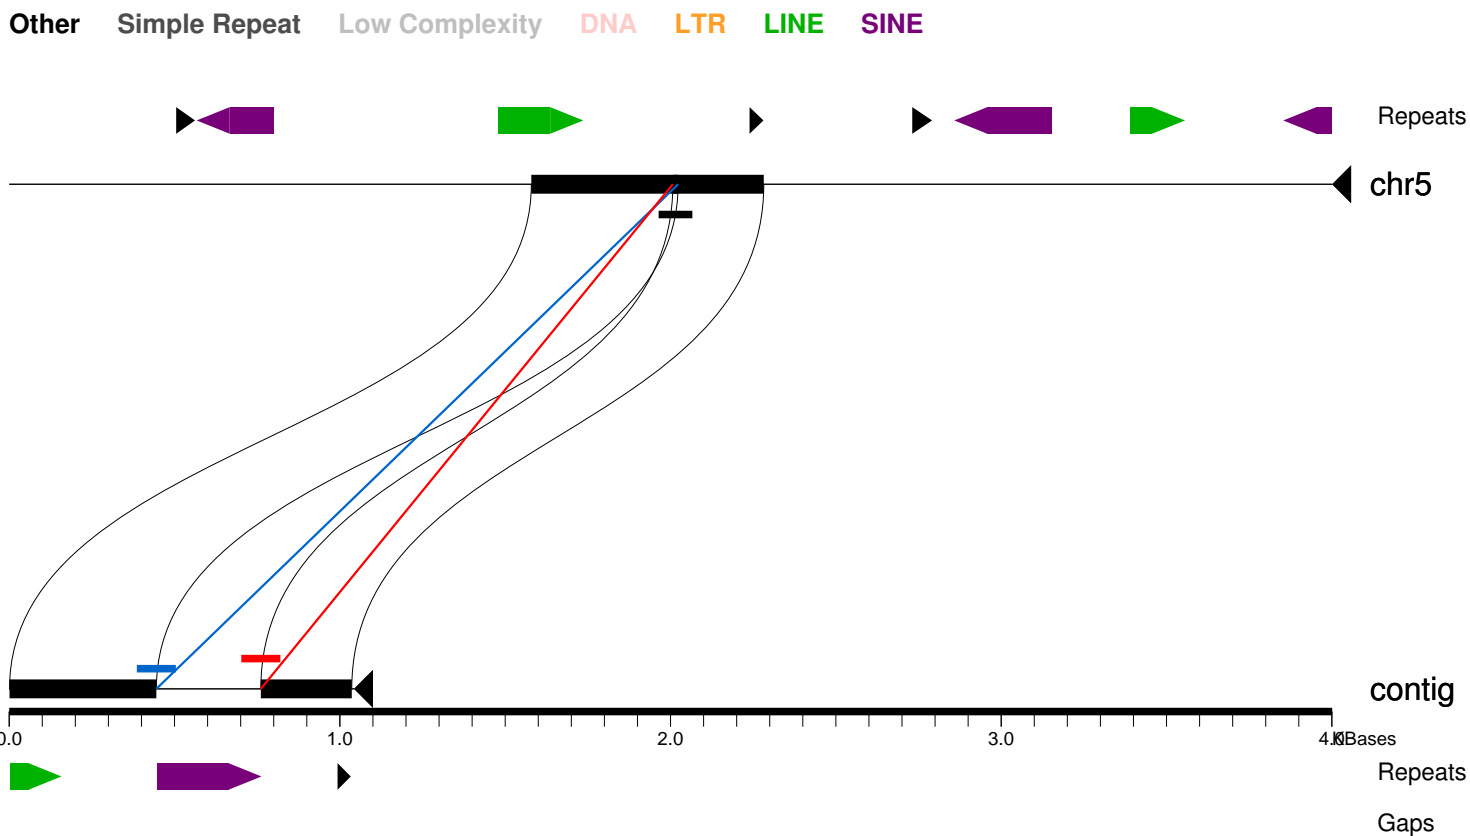

siteID: chr5\_136059697 Scaffitig1 + Breakpoint: chr5:136059712

chr5:136059668-136059771

Overlap Length: 12 INS size: 308 Genotyped: Yes

```
left   TTAG-----GAGAGCCTAAAG----GAGAATGATGTCATTT-CTTCCTAGAAGG--CAAGAGGACAT
chrom  TTAG-----GAGAGCCTAAAG----GAGAATGATGTCATTT-CTTCCTAGAAGG--CAAGAGGACAT
right  TCCGCCCCGCCTCGGCCTCCCAAAGTGCTGGGATTACAGGCGTGAGCCACCGCGCCCGGC CAAGAGGACAT
      *11*111111111*1111**1***1111*1**1*111*1*1*111*11**11*111*11*****
```

```
left   TTTTTTTTTTTTTTTTTTTTTTTTTTTTTTTTTTTGAGACGGAGTCTCGCTCTGTCGCCAGGCTGGAGTG
chrom  TGTT-----TAGGCTCAAAAAACAATATCCCAAATGAAGGCCACAGAAGCAGC
right  TGTT-----TAGGCTCAAAAAACAATATCCCAAATGAAGGCCACAGAAGCAGC
      *2**2222222222222222*2222*2222*2**2222**2*2222**22*2***22222*2222
```

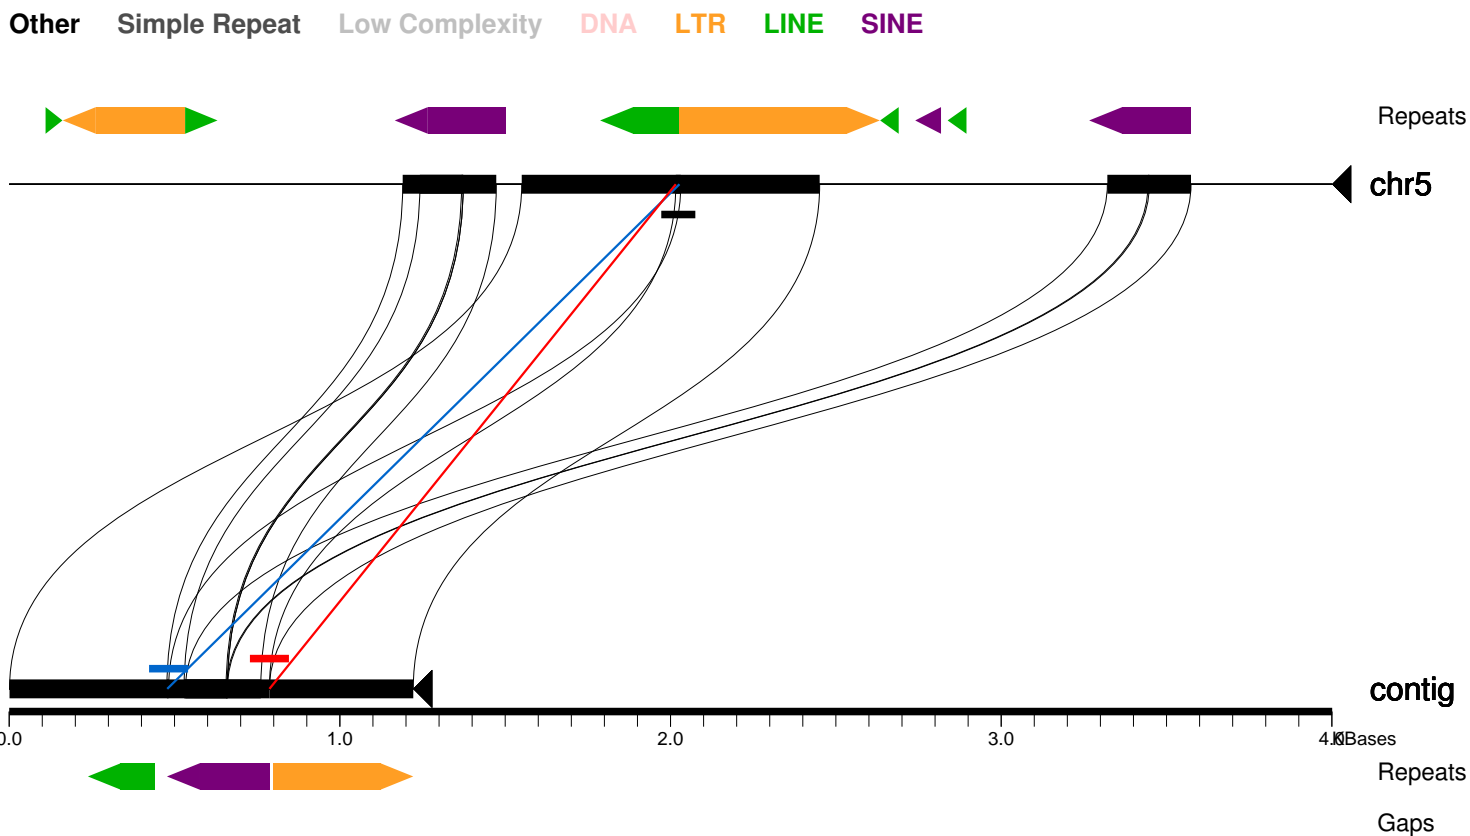

siteID: chr5\_136525693 Scaffitig1 - Breakpoint: chr5:136525702

chr5:136525645-136525760

Overlap Length: 3 INS size: 302 Genotyped: No

```
left   TG-TGGAGGAAATAGCAAGAGAACTAGAAGTGCA-----GCCTGAAGATGTGGCTGAATTACTATANN
chrom  TG-TGGAGGAAATAGCAAGAGAACTAGAAGTGCA-----GCCTGAAGATGTGGCTGAATTACTATAAT
right  GGATGGTCTCGATCTCCTGACCTCGTGATCCGCCCGCCTCGGCCTCCCAAAGTG-CTGGGT----ATAAT
      1*1***11111**11*11**111*11**111**11111111****1111*1***1***11*1111***22

left   NNNNNNNNNNNNNNNNNNNNNNNNNNNNNNNNNNNNNNNNNNNNNNNNNNNNNNNNNNNNNNNNNNNNN
chrom  TTCTTAATAAAAATTGAACAGATGAGGAGTTGCTTCCTATGGATGAGAAAAGAA---
right  TTCTTAATAAAAATTGAACAGATGAGGAGTTGCTTCCTATGGATGAGAAAAGAA---
      22222222222222222222222222222222222222222222222222222222222222222222
```

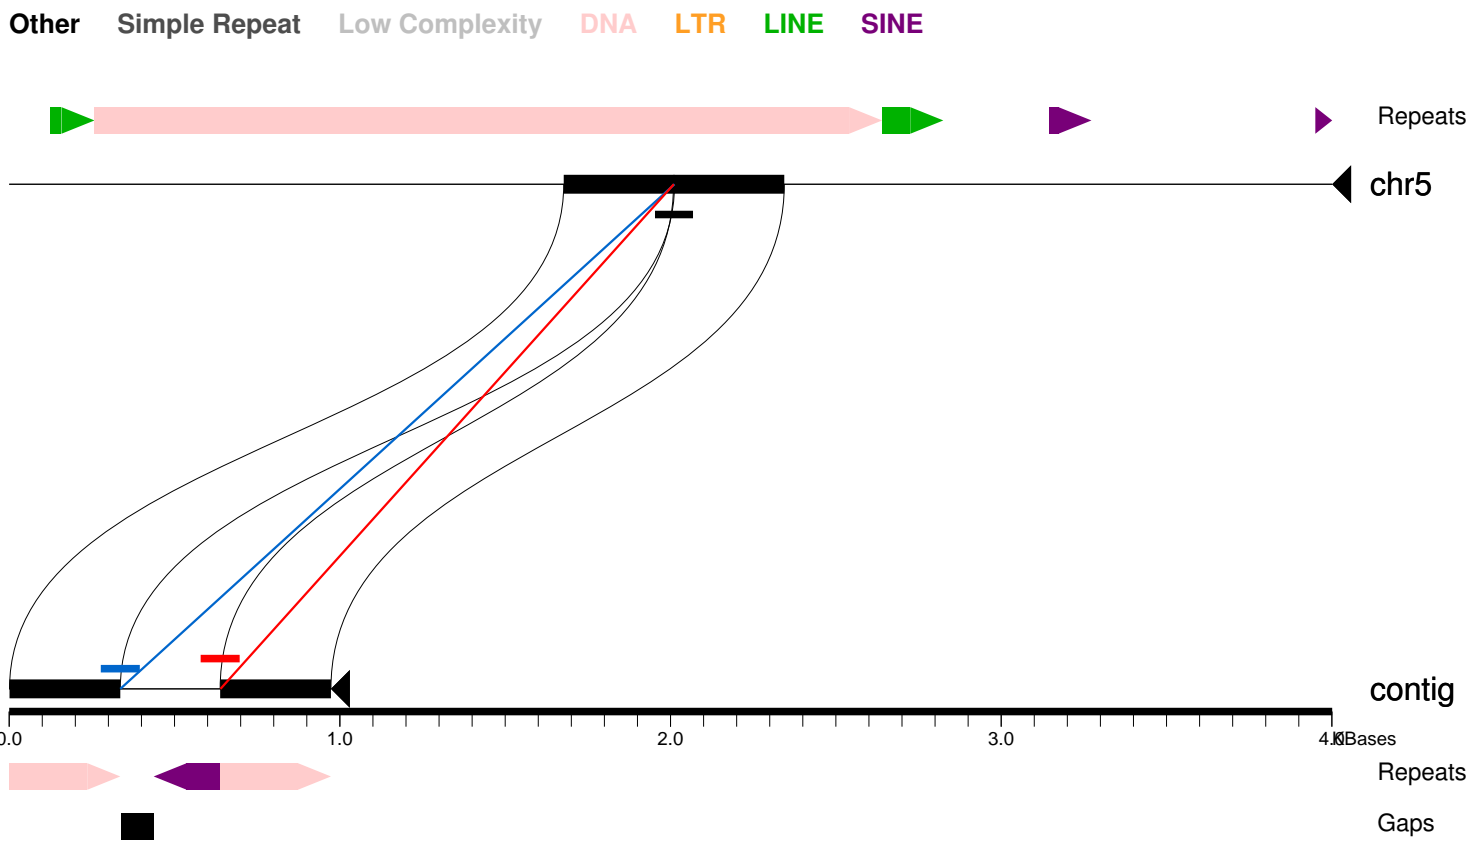

siteID: chr5\_13762462 Scaffitig1 - Breakpoint: chr5:13762470

chr5:13762427-13762529

Overlap Length: 14 INS size: 311 Genotyped: No

```
left    GTTCTGTCTTGACCCCTACCTCACTCATAGGATTCTCTGGATAA-----AGATCTGAAAT
chrom   GTTCTGTCTTGACCCCTACCTCACTCATAGGATTCTCTGGATAA-----AGATCTGAAAT
right   NNNNNNNNNNNNNNNNNNNNNNNNNNNNNNNNNNNNNNNNNNNNNNNNNNNNNNNNNNNNNNN
111111111111111111111111111111111111111111111111111111111111111
***2**2*2*22222**2***222*22**222222****22***22*22222222222222222222222222222**2*2
```

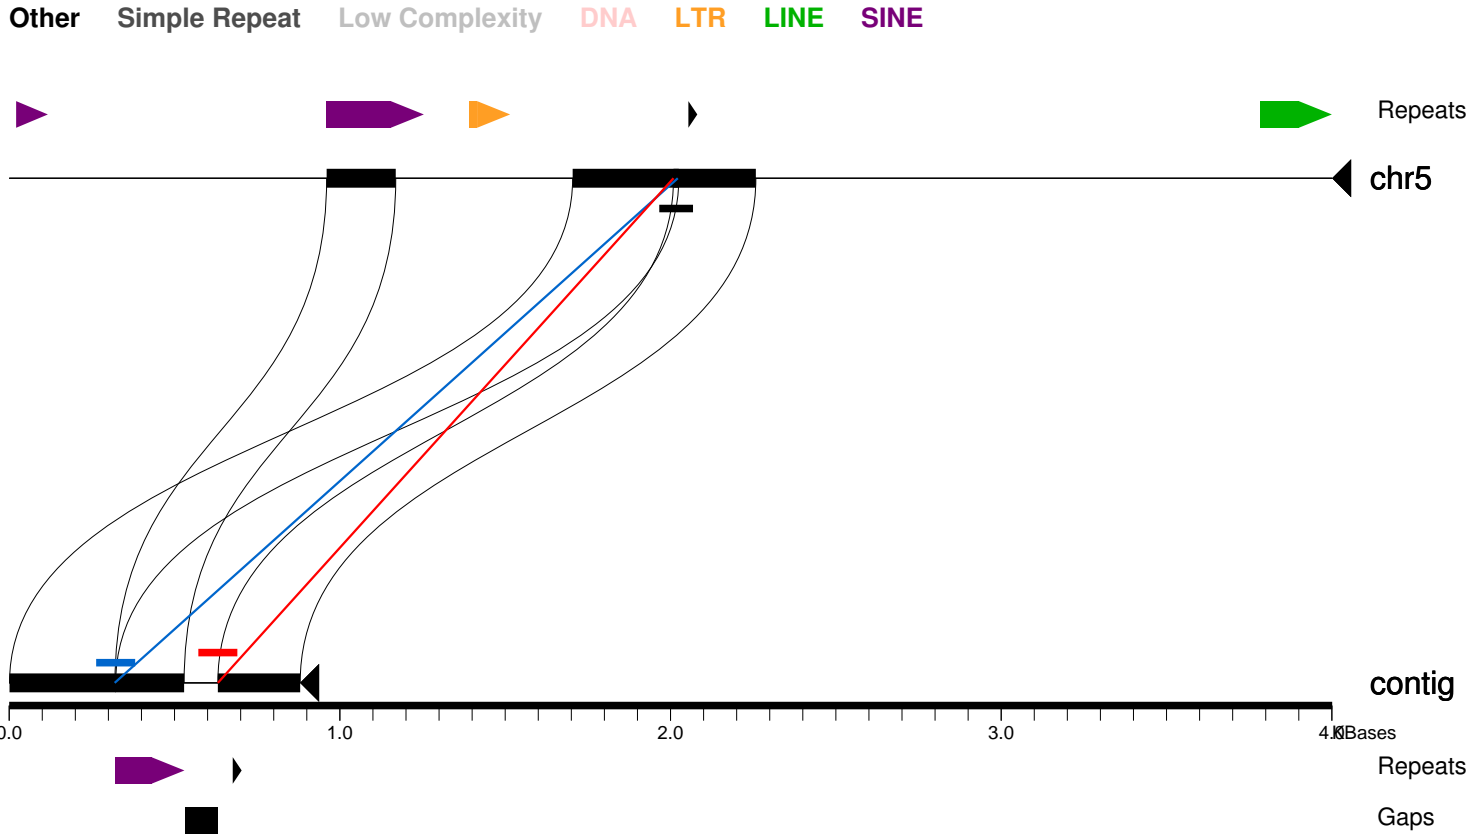

siteID: chr5\_140712968 Scafftig4 - Breakpoint: chr5:140712952

chr5:140712906-140713011

Overlap Length: 14 INS size: 314 Genotyped: Yes

```
left  G----GTATGTGTGAGAT-GCCAT-CTCTGTTTGGAAAAGAGCACTGCATTAG-----AAACGGCGATC
chrom G----GTATGTGTGAGAT-GCCAT-CTCTGTTTGGAAAAGAGCACTGCATTAG-----AAACGGCGATC
right GTCTGGCCTGGGCGACAGAGCGAGACTCCGTCTCAAAAAAAAAAAAAAAAAAAAAAAAAAAAAAAAAAAACGGCGATC
      *1111*11**1*1**1*11**1*11***1**1*11***1*11*1111*11*111111111******
```

```
left  TAGGGCCGGGCGCGGTGGCTCACGCCTGTAATCCCAGCACTTTGGGAGGCCGAGGCGGGTGG
chrom TAGCTTCTAACATTTTCTTACTTGCCTCTGGGCTAAAAGGTTTGAT-----TAG
right TAGCTTCTAACATTTTCTTACTTGCCTCTGGGCTAAAAGGTTTGAT-----TAG
      **222*222*2222*2222*22***2*222*22*2222***222222222222222*2*
```

Other Simple Repeat Low Complexity DNA LTR LINE SINE

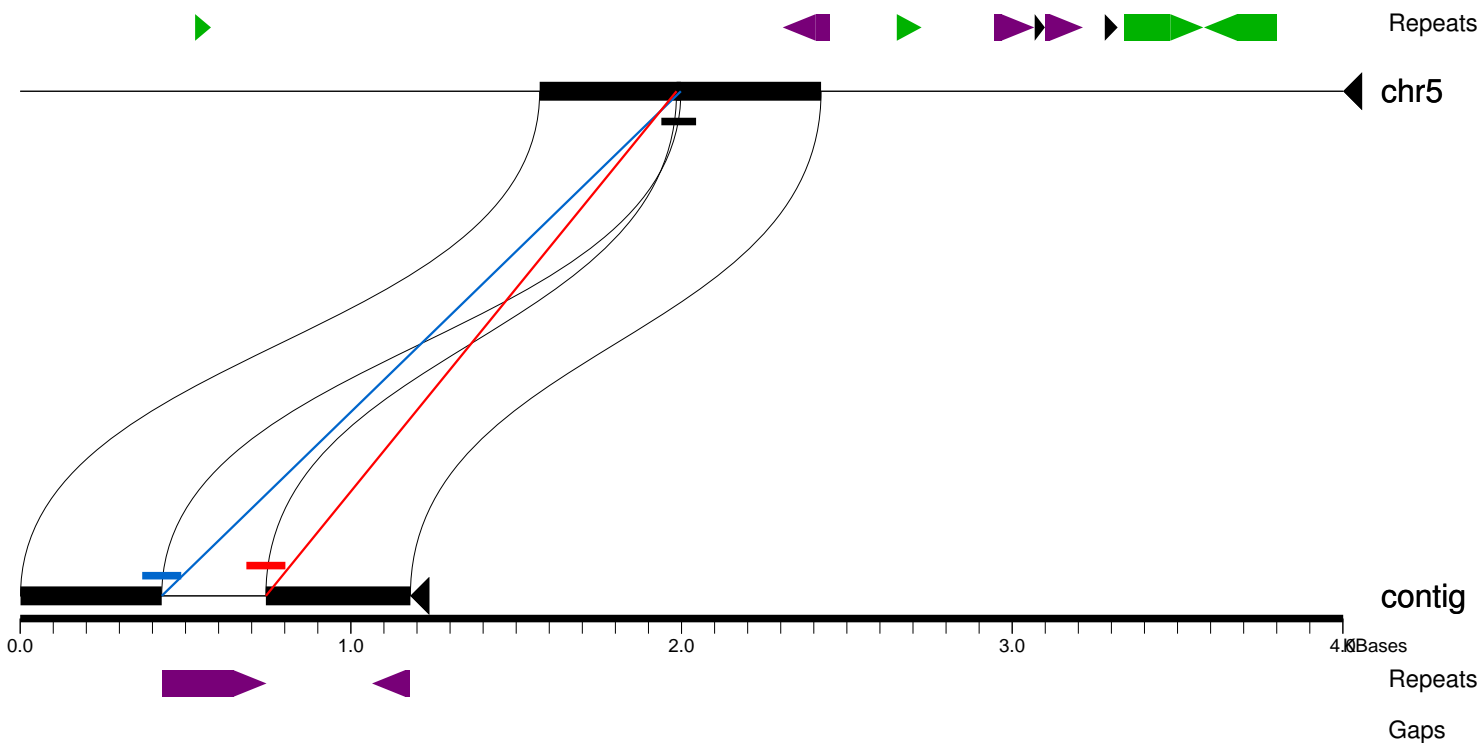

siteID: chr5\_141758651 Scaffitig7 + Breakpoint: chr5:141758643

chr5:141758596-141758702

Overlap Length: 13 INS size: 299 Genotyped: Yes

```
left  GGCTTAGGAG--AGGGTC-----TGATGAGGACAATGAGGGTTATCAAAAATTTT-----AATCCCCATT
chrom GTCTTAGGAG--AGGGTC-----TGATGAGGACAATGAGGGTTATCAAAAATTTT-----AATCCCCATT
right TCCACCCGCCTCAGCCTCCCAAAGTGCTG-GGATTACAGGCGTGAGCCACCGCGCCCGGCATCCCCATT
      1N*1111*1111**11**111111**1**1***11*111*1**1*1*1*11111111111*****
```

```
left  TTTTTTTTTTTTTT-TTGAGACGGAGTCTCGCTCTGTCGCCAGGCCGACTGCGGACTGCAGT
chrom TTTAAACCCAGTGTAAAC-----CTTGCTTTGT-----GAAGTGTAACTATCACAG-
right TTTAAACCCAGTGTAAAC-----CTTGCTTTGT-----GAAGTGTAACTATCACAG-
      **222222222*2**2*2**22222*2**2**2**222222*22*22222*22*222***2
```

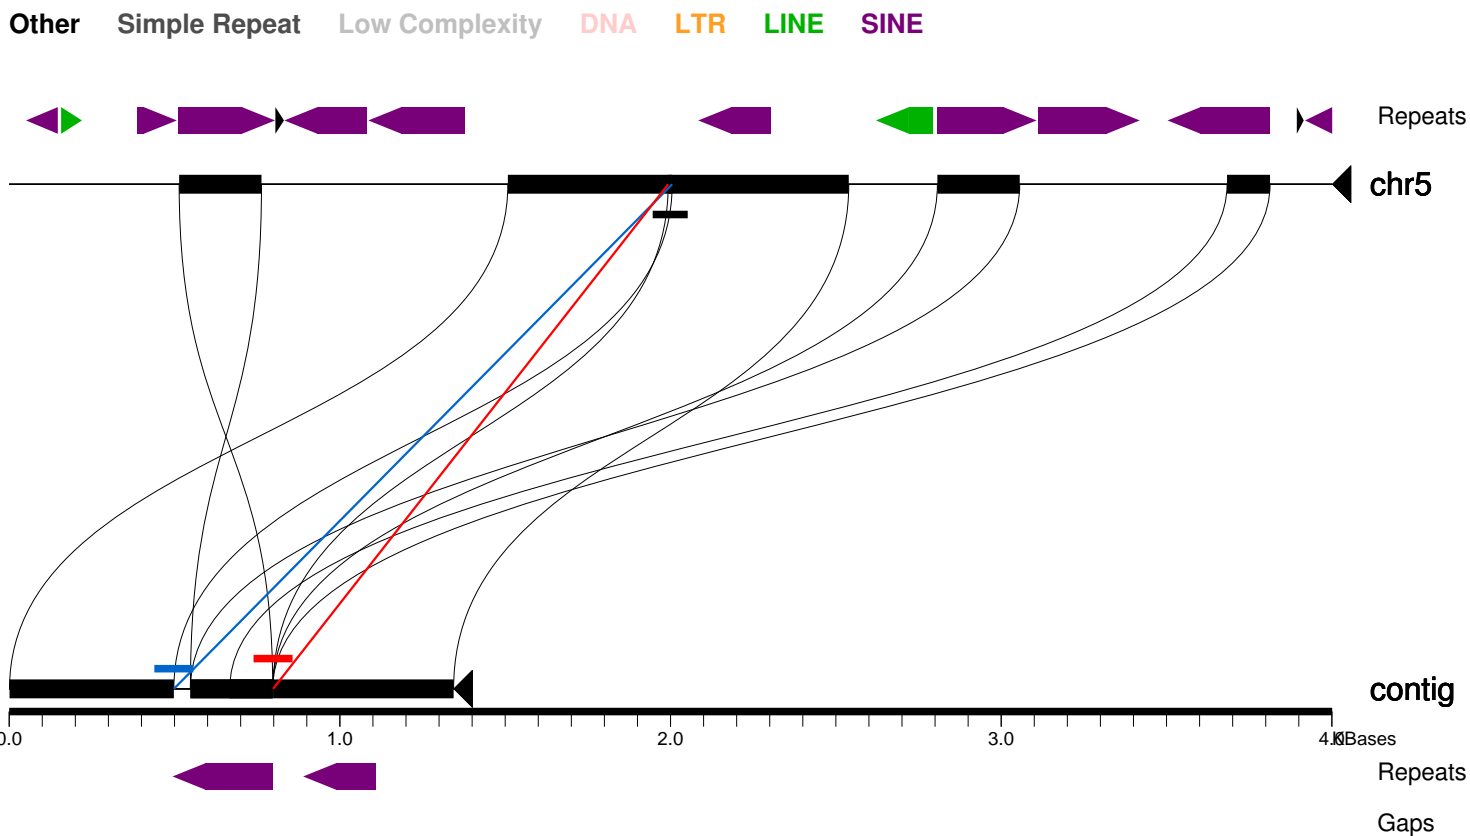

**siteID: chr5\_142355018 Scafftig1 + Breakpoint: chr5:142354996**  
**chr5:142354952-142355055**  
**Overlap Length: 16 INS size: 289 Genotyped: Yes**

```
left -----CTTTCATCTTGTGGTGT-ACTGGGGTTTCACATTCAATTTTTATCTGTCTGTCTA
chrom -----CTTTCATCTTGTGGTGT-ACTGGGGTTTCACATTCAATTTTTATCTGTCTGTCTA
right CCGCCCGCCTCGGCCTCCCAAAGTGTGGGATTACAGGCGTGAGCCACCGCGCCAGCCCTGTCTGTCTA
111111111111111111**11**111*****11*1**1**1**1111**111111111111*****
```

```
left TTTTTTTTTTTTGAGACGGAGTCTCGCTCTGTTGCCAGGCTGGAGTGCAGTGGCGGGATCTC
chrom TTTTGT-----ATAAAAAGATATTCT-GTACTAAT-----AGTTTTAAAACCAT-----CAGAT-TA
right TTTTGT-----ATAAAAAGATATTCT-GTACTAAT-----AGTTTTAAAACCAT-----CAGAT-TA
***2222222*2*2*222*2***2*22**22*2222**22*22*222**222222***2*2
```

Other Simple Repeat Low Complexity DNA LTR LINE SINE

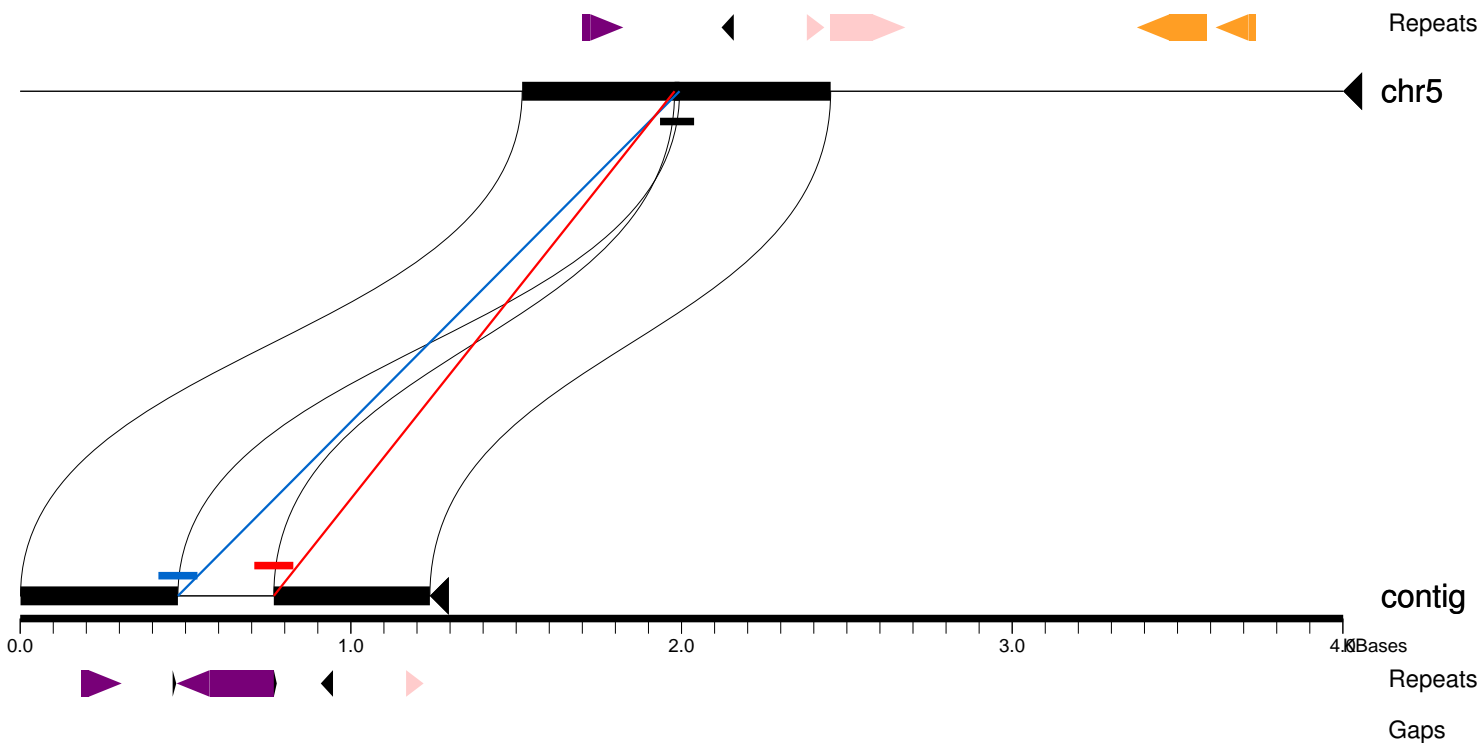



siteID: chr5\_143010785 Scaffitg1 + Breakpoint: chr5:143010790  
 chr5:143010747-143010849  
 Overlap Length: 17 INS size: 311 Genotyped: Yes

```

left  ATTT---CTACCCATGGAACCATCGACACAATCAAGATAATGAGTT-----AAAAAATCAA
chrom ATTT---CTACCCATGGAACCATCGACACAATCAAGATAATGAGTT-----A*****CAA
right GCCTGGGCGACAGAGCGAGACTCCGTCTCAAAAAAAAAAAAAAAAAAAAAAAAAAAAAAAAAA*****
      111*111*1**11*11**11*11**1*1***11*1*1**11*1111111111111111*****11**

left  TTTCTCGGCCGGGCGGGTGGCTCACGCCTGTAATCCAGCACTTTGGGAGGCCGAGGCGGGCGG
chrom TTTCTC--CCT-----TAAATTTTGTTA---CGTTGCTTTTTAATGCATGTCTCACTTC
right TTTCCC--CCT-----TAAATTTTGTTA---CGTTGCTTTTTAATGCATGTCTCACTTC
      ***1*22**222222222222*2*2222***2*222*2222****222*2**222222222222

```

Other    Simple Repeat    Low Complexity    DNA    LTR    LINE    SINE

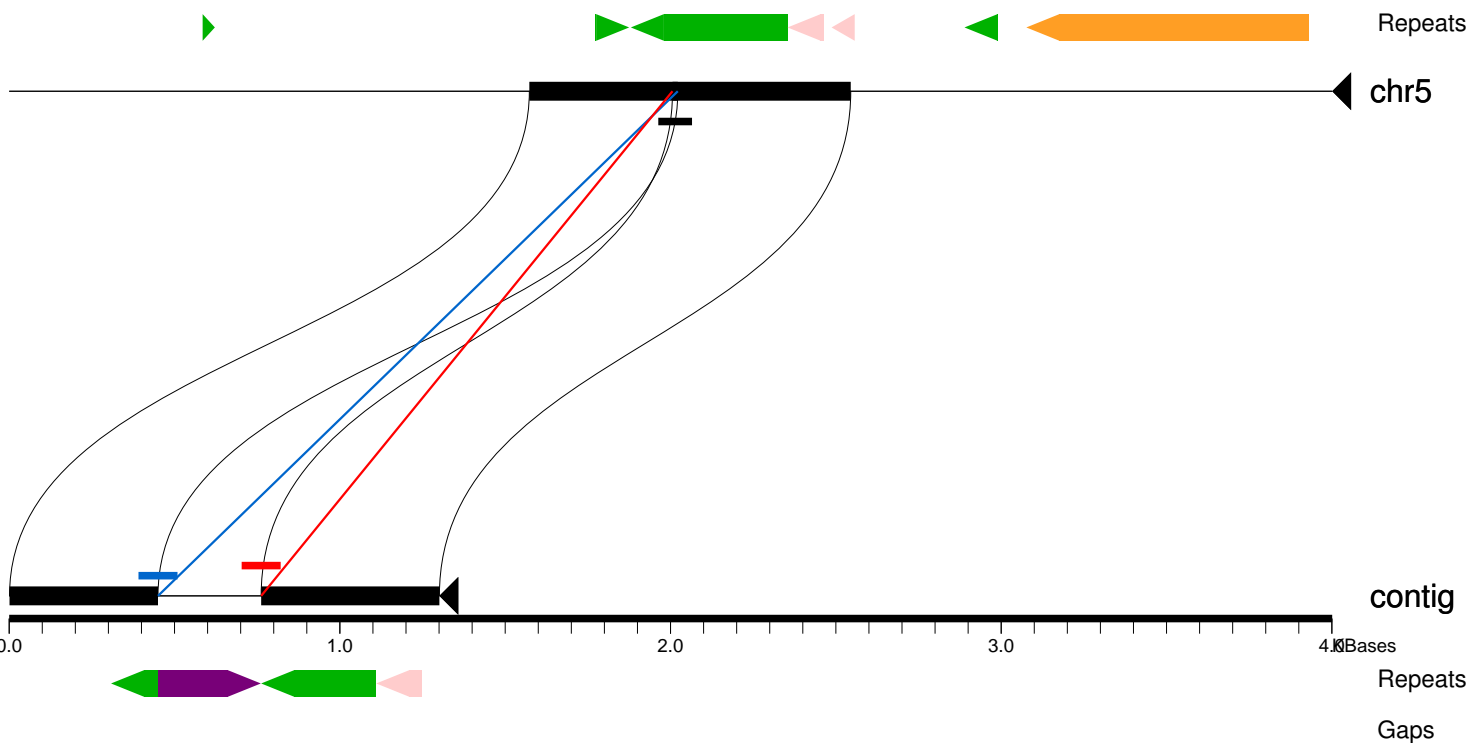



siteID: chr5\_146369628 Scafftig2 - Breakpoint: chr5:146369613

chr5:146369567-146369672

Overlap Length: 14 INS size: 304 Genotyped: Yes

```
left GA-----AATGCTAGACATAATAACCAAG-GAGG-----TGAAATATCTCTACAATTAAAACCATAAA
chrom GA-----AATGCTAGACATAATAACCAAG-GAGG-----TGAAATATCTCTACAATTAAAACCATAAA
right CAGTCCGCAGTCCGGCCTGGGCGACAGAGCGAGACTCCGTCTCAAAAAAAAAAAAAAAAAAAAAAAAACCATAAA
1*1111111*11*11*1*1111111*11*1***11111111*1***1*111111*1**11*****
```

```
left ACAGGCCGGGCGCGGTGGCTCACGCCTGTAATCCAGCACTTTGGGAGGCCGAGGCGGGTGG
chrom ACATTAA-----TGAAAGAAGC-TGAAA----AAGACAAATAAATGAAAAGACATCCTG
right ACATTAA-----TGAAAGAAGC-TGAAA----AAGACAAATAAATGAAAAGACATCCTG
**222222222222**2222*2**2**2**2222*22**222222*2*222**2*22222*
```

Other Simple Repeat Low Complexity DNA LTR LINE SINE

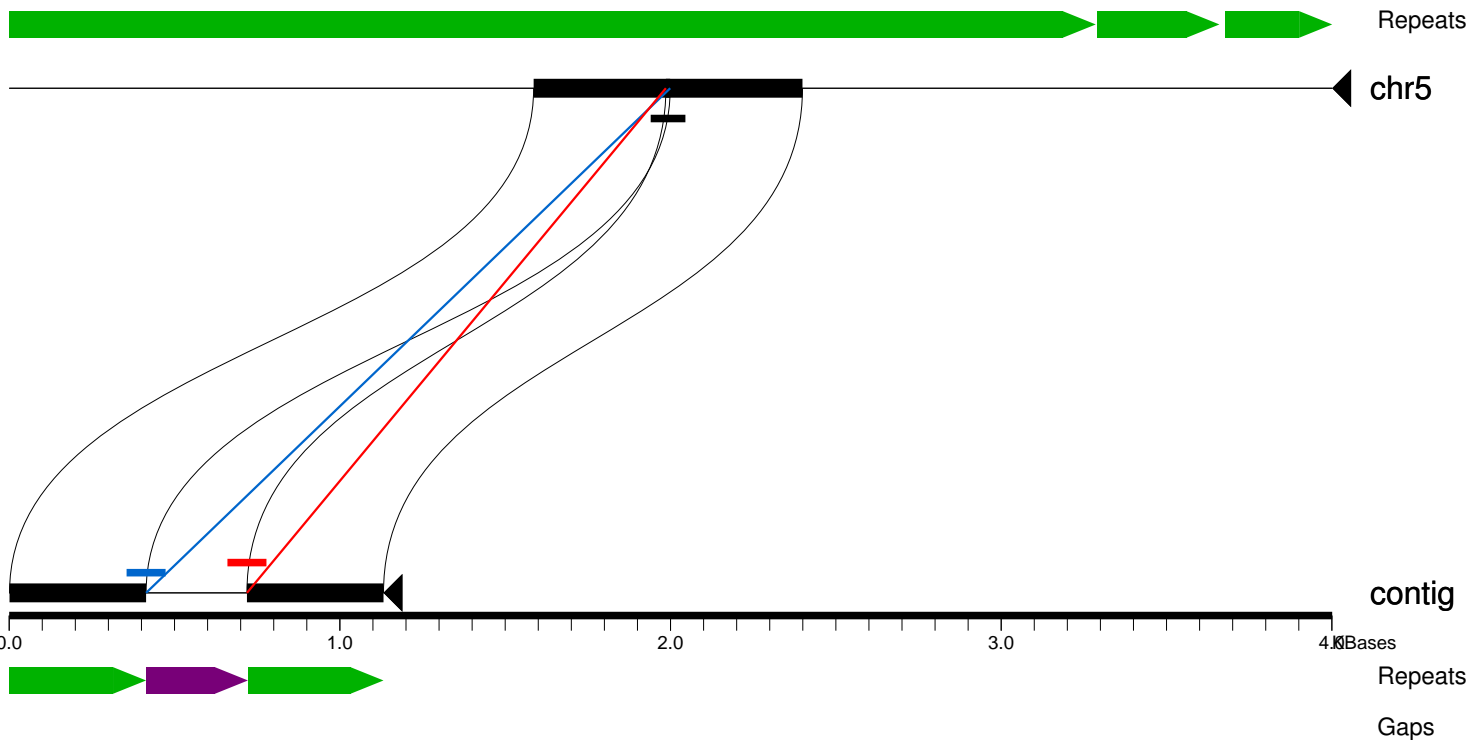

siteID: chr5\_146637734 Scafftig1 + Breakpoint: chr5:146637717

chr5:146637418-146637877

Overlap Length: 82 INS size: 430 Genotyped: No

```

left    T-----
chrom  TTCTAAGAAATGGACCTTTTGTTTTAAATGTGGGGACATCAGCAGTGGACTTTTATAGTCCTTGGTGCCTT
right  CCC-----GGCT-----
          1N2                               2N22
  
```

```

left    -----
chrom  TTTACTGAGAAATTTTCCTTTAGCACCTATTTTATTAGATTTTAGACCAAAGAAGGCCAAACACCATTTT
right  -----AATTT---TTTG-----TATTTTTAGTAGA-----GACGGGGTTTCACCGTTTT
          22222  222N    22222222N2222                      22N22NNNNN2222N2222
  
```

```

left    -----
chrom  ATATTTAACAGTGCCTTCCTGTATGATTCCTTATACCAGATAAGCTAAGTTTTCACCTTTTATATTAGCAAGTT
right  AG-----CCGGGATGGT-----CTCGAT-----CTCCT-----
          2N                22N2N222N2         2NN222                2N222
  
```

```

left    -----
chrom  GTTAAACTTAATTTTAAATAAAAATTTGTAGACATATTTATCCAATTTTAAATGTCTGACCATAATG-TAT
right  -----GACCTCGTGATCCGCCCGCTCGGCCCTC-CCAAAGTGCTGG
          222N2NN2N2222NNNNNNNNNNN2N22N  222N2N2212NN
  
```

```

left    -----ATAGACTCTTTTTAACCTTTTTATAATTTTTGTAAAGAGCAGGTTAGTGCTTTAAGAAATACC
chrom  GATTCCTTATAGACTCTTTTTAACCTTTTTATAATTTTTGTAAAGAGCAGGTTAGTGCTTTAAGAAATACC
right  GATT---ACAGGC-----AACCTTTTATAATTTTTGTAAAGAGCAGGTTAGTGCTTTAAGAAATACC
          2222  *1*1*1111111******
  
```

```

left    TGTGTGCCTTTTATTTAATGTCAGTTCACANNNNNNNNNNN-----
chrom  TGTGTGCCTTTTATTTAATGTCAGTTCACAGAAAACTGTATGATACCCCTTAAACTTTAGCCAATAT
right  TGTGTGCCTTTTATTTAATGTCAGTTCACAGAAAACTGTGTGATACCCCTTAAACTTTAGCCAATAT
          *****222222222N222222222222222222222222222222222222222222222
  
```

```

left    -----
chrom  GTTTACACACAGAATTTTCCTTTTATAATTAACATTTCAAAC
right  GTTTACACACAGAATTTTCCTTTTATAATTAACATTTCAAAC-
          2222222222222222222222222222222222222222222222222222222
  
```

Other   Simple Repeat   Low Complexity   DNA   LTR   LINE   SINE

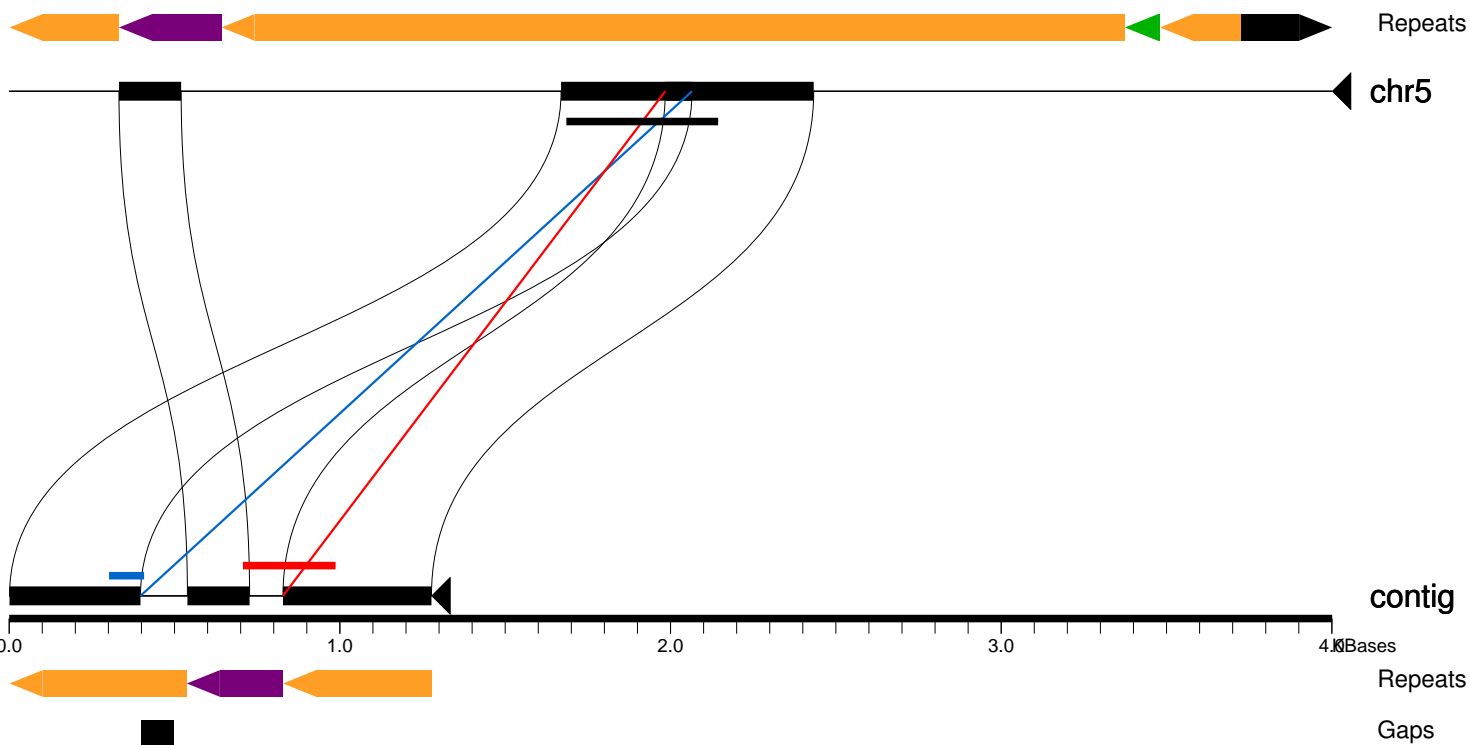



siteID: chr5\_148080090 Scafftig2 + Breakpoint: chr5:148080071

chr5:148080027-148080130

Overlap Length: 16 INS size: 301 Genotyped: Yes

```
left TAGGAAAT----GGTTAAAACAATATTTGGAAAAAATTTAGAGCTTT-----ACTTGTCTTTT
chrom TAGGAAAT----GGTTAAAACAATATTTGGAAAAAATTTAGAGCTTT-----ACTTGTCTTTA
right CCGCCCTCCTCGGCCTCCCAAAGTGCTGGGATTACAGGCGTGAGCCACCGCGCCCGGCCACTTGTCTTTA
      11*1111111111*11*111*1*1*11*1***11*1*11111****111111111111111******2
```

```
left TTCTTTTTTTTTTTTTTTTTTTTTTTTGGAGACGGAGTCTCGCTCTGTCGCCAGGCTGGAGTGCAG-
chrom TTCTTAATAAAAAT-----AAAAGAACATTCACTATGTT-CCCA--CATCATATAAGA
right TTCTTAATAAAAAT-----AAAAGAACATTCACTATGTT-CCCA--CATCATATAAGA
      ***22*2222*22222222222222*2*2*2*222**2**2***22***22*222*222**2
```

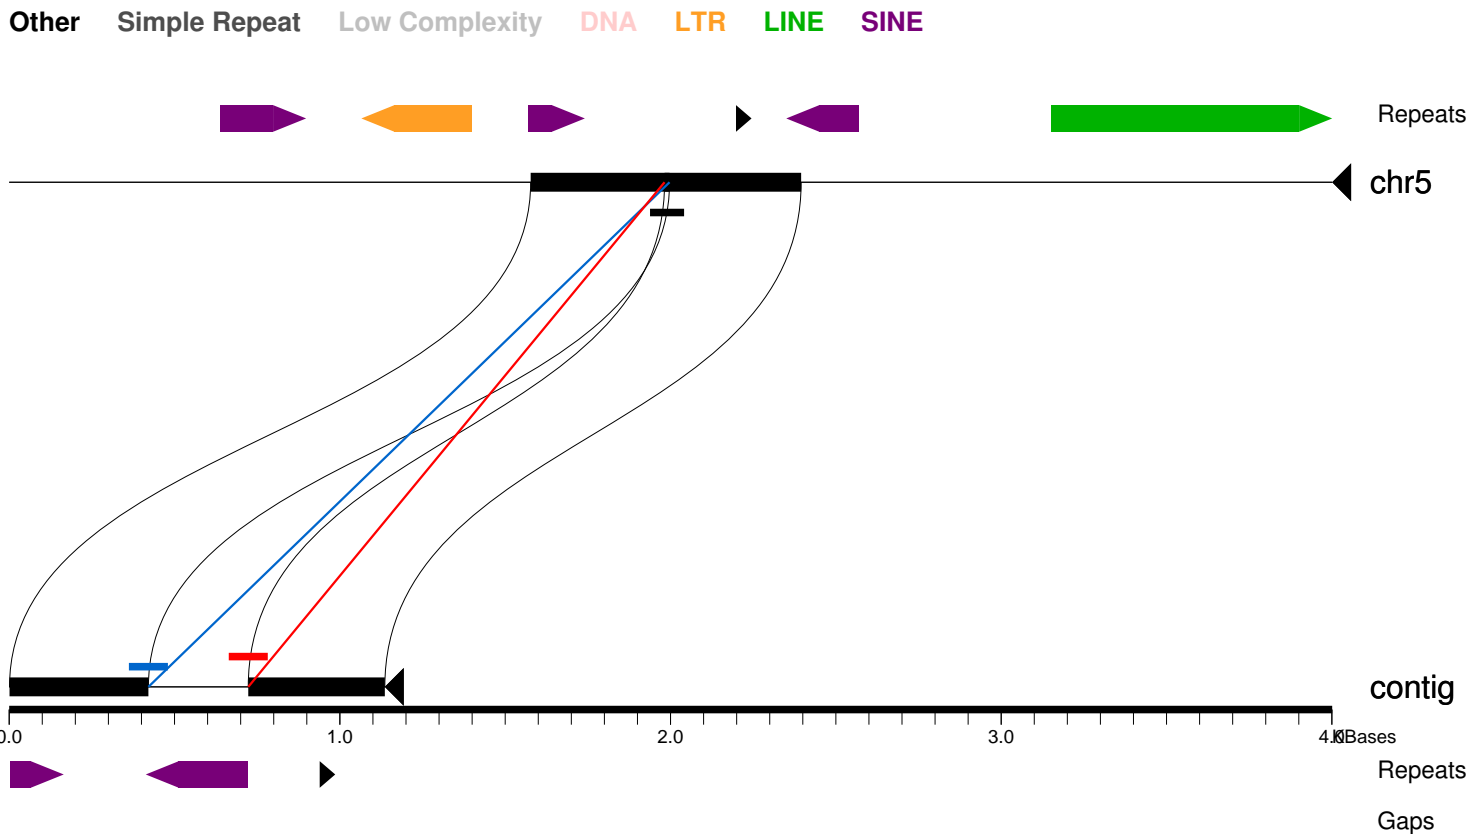







siteID: chr5\_153101885 Scaffitg1 - Breakpoint: chr5:153101818

chr5:153101658-153101994

Overlap Length: 17 INS size: 295 Genotyped: No

```

left -----TTGGTCACTTTTCTGTTAGGTCATCT
chrom ATTTGAGTAGCTATCCTCTTTTATAAAGTACTTTTGTAAAGTCTTTGGTCACTTTTCTGTTAGGTCATCT
right TTT--AGTAGAGACGGGGTTTCA-----CGGTTTTAGCCGGGATGGTCTCGATCTCCTGACCTCGT--
N22 22222NN2NNNNN222N2 2NN22N22NNNNN1*****1*11*1111*1*11**1*11
    
```

```

left GTTCTTTTCTTATTGTTGTAC--AAGTATTCTTCATATAGCCTTGACATAAGTCCCTTTTTTAGTTGTATA
chrom GTTCTTTTCTTATTGTTGTAC--AAGTATTCTTCATATAGCCTTGACATAAGTCCCTTTTTTAGTTGTATA
right GATCCGCCCCTCGGCTCCCAAAGTGCTGGGATTACAGGCGTGAGCCACCGG-----
*1**1111*111*1*111*1*11***11*11111**1**1*1***111*111*111111111111111
    
```

```

left TATTGTTAATATTGTCCTCATTTCTGTGGCTTATCTTT-----
chrom TATTGTTAATATTGTCCTCATTTCTGTGGCTTATCTTTTCACTGTCTTTGGCAGTGTGTGCATGTTGAACAG
right -----CCCGGCCCTCTGTGGCTTATCTTTTCACTGTCTTTGGCAGTGTGTGCATGTTGAACAG
111111111111111111*1*1111******1*****222222222222222222222222222222222
    
```

```

left -----
chrom AAATACATAAactTTAATGTagTCCAGTTTCACAAGATTTTTTCTTTATGCCTAGTACTTTTTTGTGTCTTG
right AAATACATAAactTTAATGTagTCCAGTTTCACAAGATTTTTTCTTTATGGCTAGTACTTTNNNNNNNNNNNN
2222222222222222222222222222222222222222222222222222222N2222222222NNNNNNNNNNNN
    
```

```

left -----TTNNNNNNNNNNNN
chrom CTTAAGAAGACTTTTACCTACCTCAAAGTCATAAAGATATTCTTTTATAGTTTCTTCTGA
right NNNNNNNNNNNNNNNNNNNNNNNNNNNNNNNNNNNNNNNNNNNNNNNNNNNNNNNNNNNNNNNNNNNNNNN
NNNNNNNNNNNNNNNNNNNNNNNNNNNNNNNNNNNNNNNNNNNNNNNNNNNNNNNNNNNNNNNNNNNNNN 1NNNNNNNNNNNN
    
```

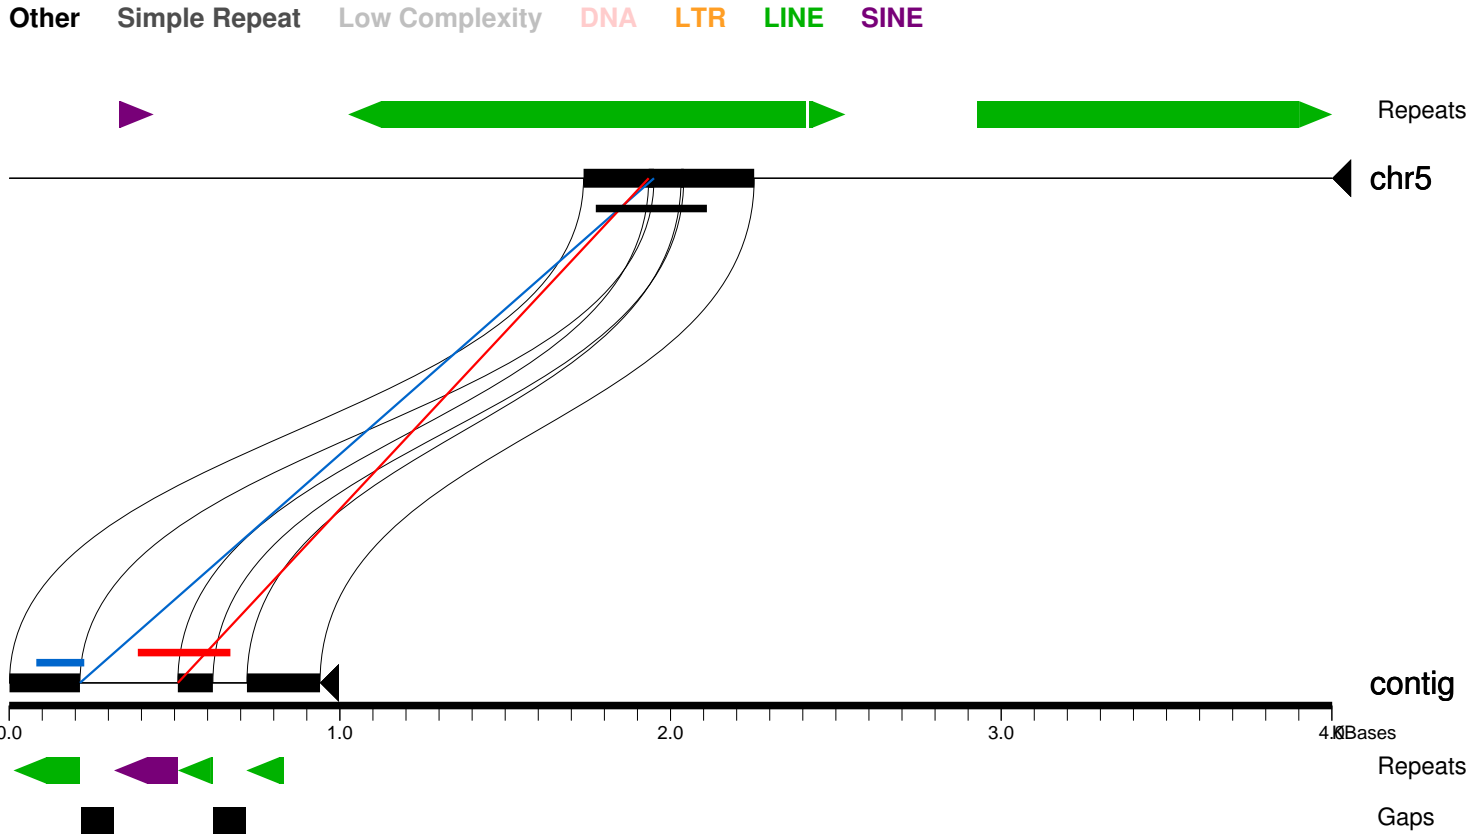

siteID: chr5\_158717178 Scafftig4 + Breakpoint: chr5:158717158

chr5:158717113-158717217

Overlap Length: 15 INS size: 297 Genotyped: Yes

```
left  A-----GTGTATTTAGAGAGCTG----TACAACCATCACTGTAAGCTAATTTTAGAACCTGATTT
chrom A-----GTGTATTTAGAGAGCTG----TACAACCATCACTGTAAGCTAATTTTAGAACCTGATTT
right CCGCCCGCCTCGGCCTCCCAAAGTGCTGGGATTACAGGCGTGAGCCACCGCGCCCGGCCGAACCTGATTT
      111111111111*11111111*1**1***1111***11*1*1*1111111*11111111******
```

```
left  ATTTATTTTTTTTTTTTTTTTTTTGAGACGGAGTCTCGCTCTGTCGCCAGGCTGGAGTGCAGTGGC
chrom ATTT-----TTAAAAGGATCATTCCGGTTCT-TGTGTGAGAATGGGTTATCGAAG-
right ATTT-----TTAAAAGGATCATTCCGGTTCT-TGTGTGAGAATGGGTTATCGAAG-
      ***222222222222**222**2222*2**22*2***2*22222**22***22*222*22*2
```

Other Simple Repeat Low Complexity DNA LTR LINE SINE

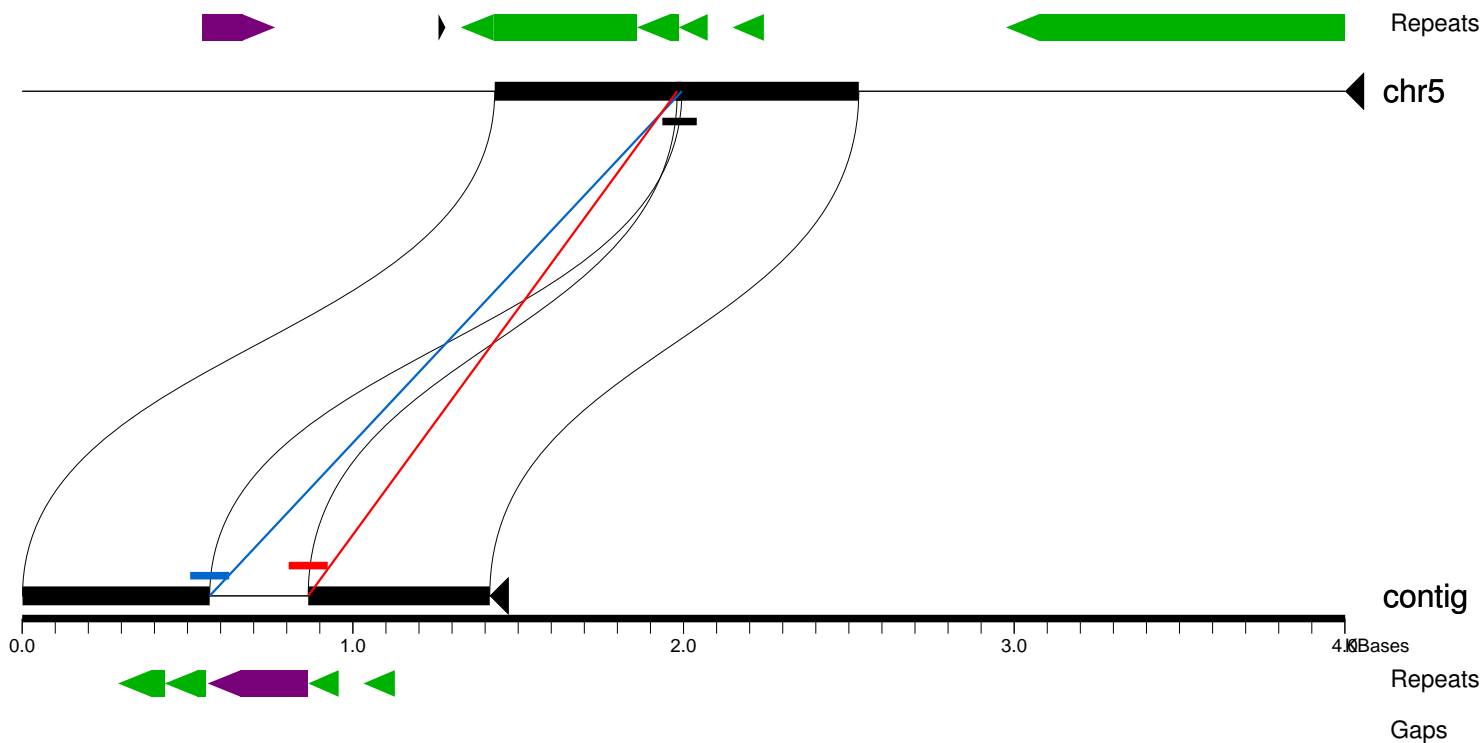

siteID: chr5\_159122137 Scafftig5 - Breakpoint: chr5:159122138

chr5:159122096-159122197

Overlap Length: 18 INS size: 283 Genotyped: Yes

```
left  AT----TTGGGGGACT-----TGGGGGAAAAGGTGGGAGGGGGTG--AGGGATAAAAGATTATA
chrom AT----TTGGGGGACT-----TGGGGGAAAAGGTGGGAGGGGGTG--AGGGATAAAAGATTATA
right TCGAGATCGCGCCACTGCGCTCCAGCCTGGGCGACAGAGCGAAACTCCGTCTCAAAAAAATAAAGATTATA
      111111*1*1*11***111111111111****1*1*11*1*11*1111**111*111*1*****

left  CACTGGG--CCGGGCGCGGTGGCTCACGCCTGTAATCCAGCACTTTGGGAGGCCGAGACGGGCGGAT
chrom CACTGGGTACAGTGTACTG-CTCAGG----TGAT-----GGGTGGACCAAAATCTCA---
right CACTGGGTACAGTGTACTG-CTCAGG----TGAT-----GGGTGGACCAAAATCTCA---
      *****22*2*2*22*22**2*****2*2222*2**2222222222***2**2*2*2*2222*2222
```

Other Simple Repeat Low Complexity DNA LTR LINE SINE

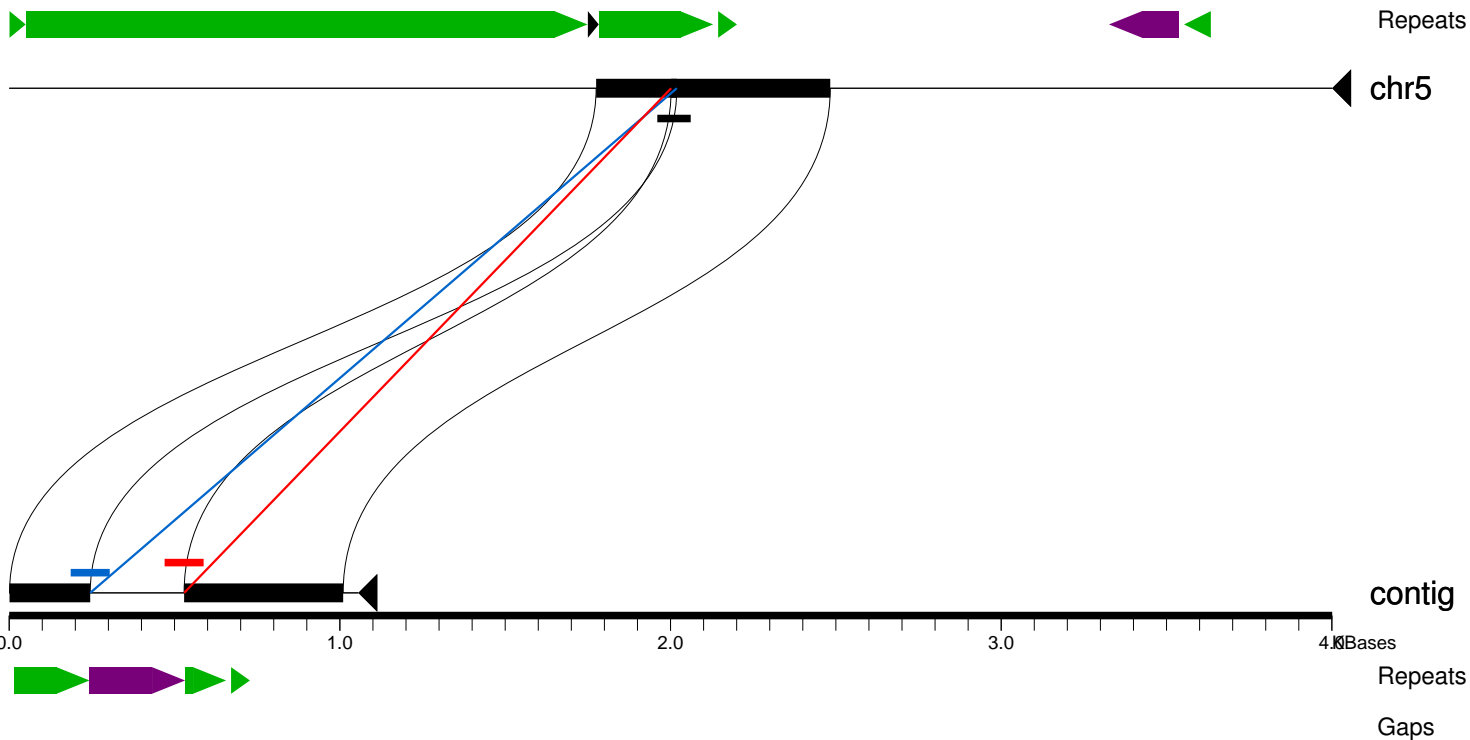

siteID: chr5\_160617319 Scaffoldig2 + Breakpoint: chr5:160617287

chr5:160617213-160617346

Overlap Length: 12 INS size: 437 Genotyped: No

```
left ATGAAGTAATAAATCCCTCATACTTCTTTTTGCTTAAGCTAGTTTGATTTTTTTTTTTATCTGTTGC
chrom ATGAAGTAATAAATCCCTCATACTTCTTTTTGCTTAAGCTAGTTTGATTTTTTTTTTTT-ATCTGTTGC
right NNNNNNNNNNNNNNNNNNNNNNNNNNNNNNNNNNNNNNNNNNNNNNNNNNNNNNNNNNNNNNNAAAA-----
11111111111111111111111111111111111111111111111111111111111111112111111111
```

```
left AACTGAAGAATGCCTGAG-----GCCGGGCGCGGTGGCTCACGCCT----GTAATCCC---
chrom AACTGAGAATGCCTGACTAATATAAAGTCTGTTGCTAATTAGCAAGCCCTCTGGCAAACATTGT
right AAAAAAGAATGCCTGACTAATATAAAGTCTGTTGCTAATTAGCAAGCCCTCTGGCAAACATTGT
**111*****222222222*2*2*22**222222**2***22222*2*2*22222
```

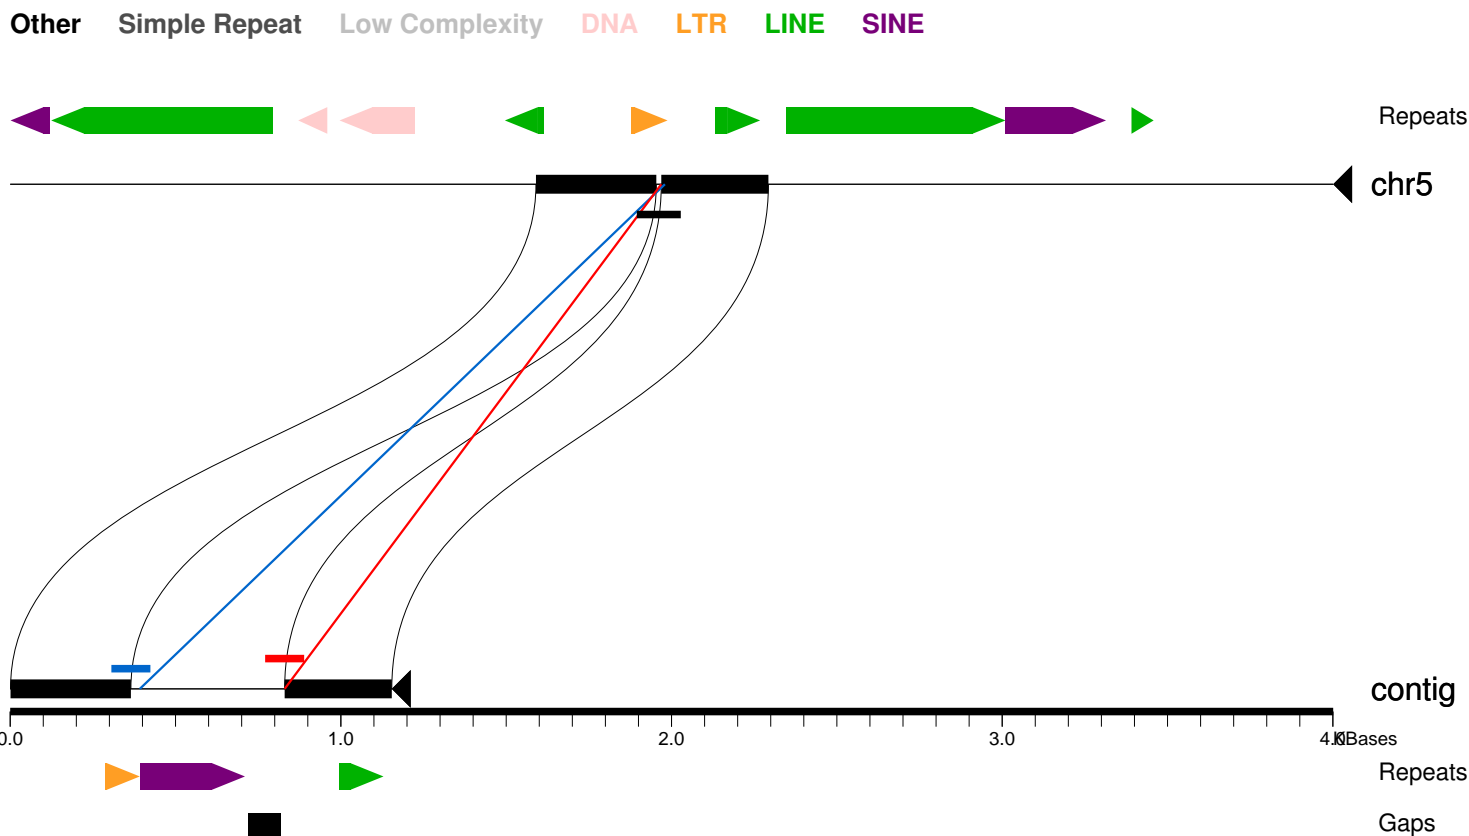

siteID: chr5\_162231935 Scaffitig5 + Breakpoint: chr5:162231938

chr5:162231892-162231997

Overlap Length: 14 INS size: 301 Genotyped: Yes

```

left   TC-CTCACATGTTGATTTCTAACCAAAGTAGATTTTCTCAGATTTTAT-----TAACCGTA
chrom  TC-CTCACATGTTGATTTCTAACCAAAGTAGATTTTCTCAGATTTTAT-----TAACCGTA
right  CCGCCCGCCTCGGCCTCCCAAAGTGCTGGGATTA---CAGGCGTGAGCCACCGCGCCCGGCCTAACCGTA
       1*1*1*1*1*11*11*1*1**11111111*****1111***111*1*1111111111111111*****
  
```

```

left   CATTTTTFFFFFFFFFFFFFFFFFFFFFFFFGGAGACGGAGTCTCGCTCTGTCGCCAGGCTGGAGTGCAG
chrom  CATTTTAAGGAACAATCCTAAACTTTCCA--GGGGT---GGTATTT-----GATAGCAA-CAG
right  CATTTTAAGGAACAATCCTAAACTTTCCA--GGGGT---GGTATTT-----GATAGCAA-CAG
       *****222222222*22*2222**22222*2**222*2*2*2*2222222*2*2*2222***
  
```

Other   Simple Repeat   Low Complexity   DNA   LTR   LINE   SINE

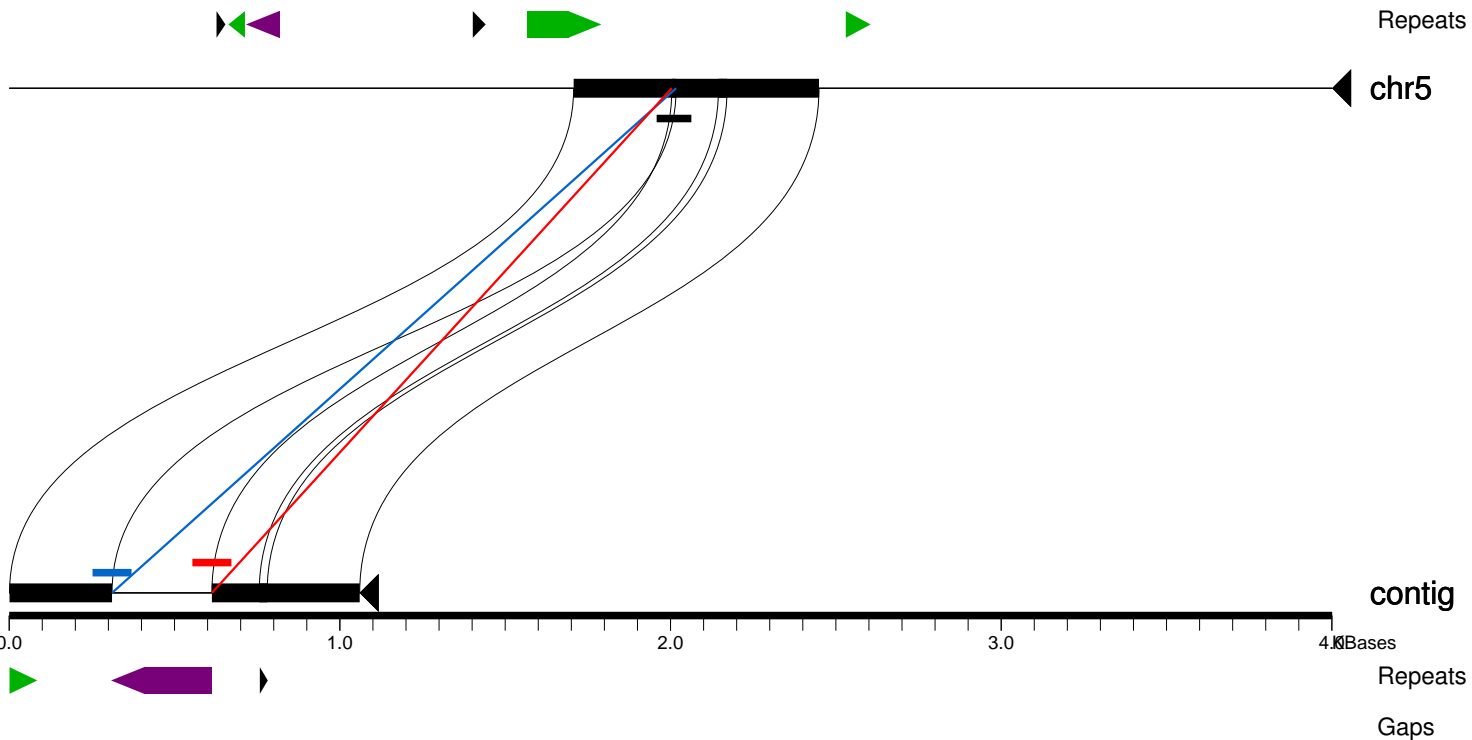

siteID: chr5\_163311139 Scafftig1 + Breakpoint: chr5:163311118

chr5:163311073-163311177

Overlap Length: 15 INS size: 311 Genotyped: Yes

```
left  ACC-----CTTGGT-----AATCTCCT---AAACCAGTGGTCTACAACCTTTTTTGGCACCAGGGACCAG
chrom ACC-----CTTGGT-----AATCTCCT---AAACCAGTGGTCTACAACCTTTTTTGGCACCCAGGGACCAG
right TCCGCCCCGCCTCGGCCTCCCAAAGTGCTGGGATTACAGGCCTGAGCCACCGCGCCCGGCCCCAGGGACCAG
      1**1111111**1**1111111**11*1**111*111***11**111*1***1111111*11******
```

```
left  TTTTTTTTTTTTTTTTTTTTTTTTTTTTTTTTTTTGGAGACGGAGTCTCGCTCTGTGCGCCAGGCTGG
chrom TTTTATGGAAGACAATTTTTTCCATG-----GATGGGGTG-----AGGTGGGAAGTGGGG
right TTTTATGGAAGACAATTTTTTCCATG-----GATGGGGTG-----AGGTGGGAAGTGGGG
      ***2*222222222*****222*222222222**2**2**22222222*22*222**222**
```

Other Simple Repeat Low Complexity DNA LTR LINE SINE

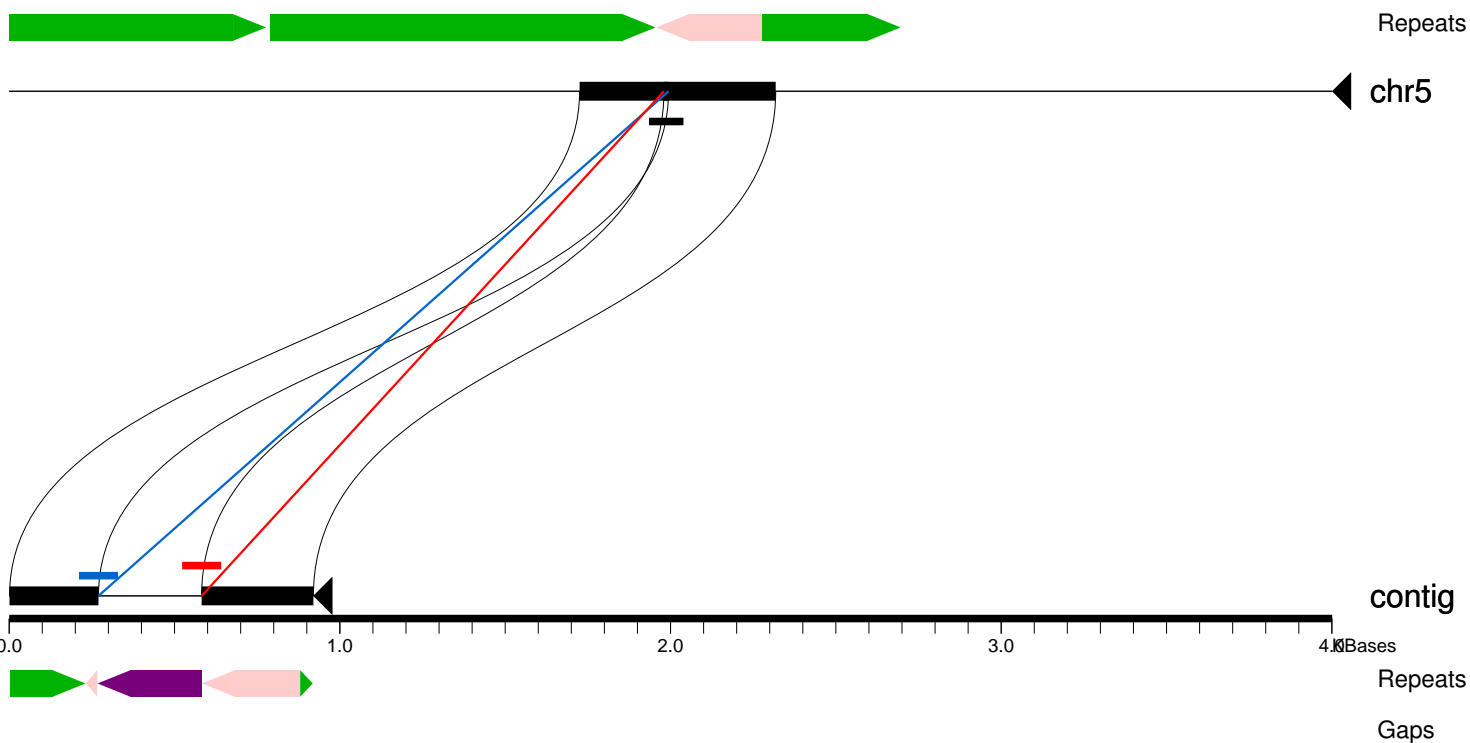



siteID: chr5\_168911905 Scafftig6 - Breakpoint: chr5:168911928

chr5:168911874-168911987

Overlap Length: 6 INS size: 293 Genotyped: Yes

```
left  TTTTACCTATAGCTATGTAATAAAATCCAAGAATACATGGCTATTATCATTGTTT-----AAAGAGCGCGG
chrom TTTTACCTATAGCTATGTAATAAAATCCAAGAATACATGGCTATTATCATTGTTT-----AAAGAGTACTT
right ACTGCACTCCAGCCTGGGCGACAGAGCGAGACTCCGTCTCAAAAAAAAAAAAAAAAAAAAAAAAAAAAGAGTACTT
      11*111**11***111*11111*111*1***1*1*1*11*1*11*11*111111111111*****22*22
```

```
left  TGGCTCACGCCTGTAATCCCAGC-ACTTTGGGAGGCCGAGGCGGGCGGATCA-CGA
chrom TT-----TTTTTAGTGACACTTACTTAGTAAGAAAAATGGTATATAATTATCCA
right TT-----TTTTTAGTGACATTTACTTAGTAAGAAAAATGGTATATAATTATCCA
      *2222222222*2**2*22**N22****2*22**2222*2*22222221*2*2*2*
```

Other Simple Repeat Low Complexity DNA LTR LINE SINE

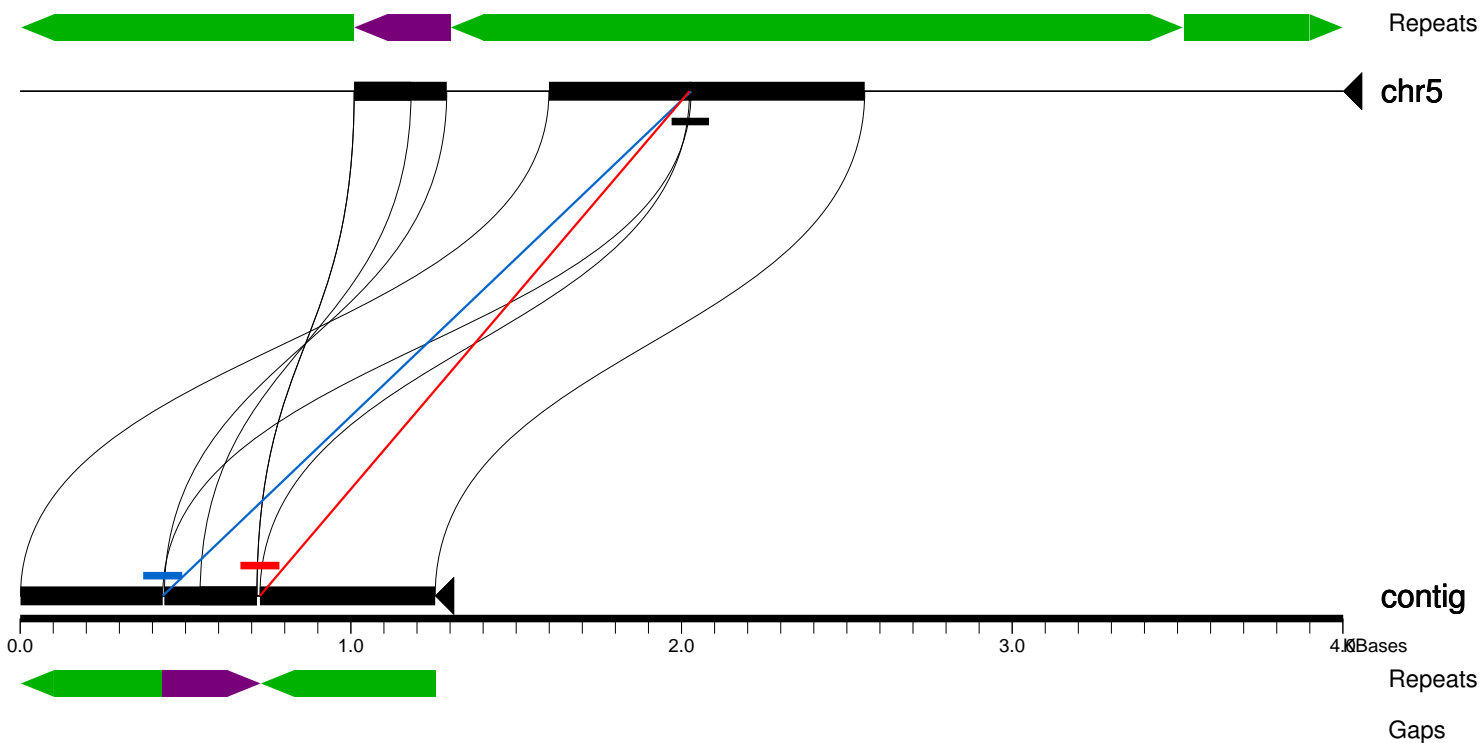



siteID: chr5\_170201345 Scaffitg1 + Breakpoint: chr5:170201326

chr5:170201166-170201499

Overlap Length: 14 INS size: 296 Genotyped: Yes

```
left      T-----TTTGCAAATGAGATCCTGTTCATTTCCAACATGGATGGAACTGGGGAACATGTTAG
chrom     TAGGGAAATGCTGATTTTGCAAAATGAGATCCTGTTCATTTCCAACATGGATGGAACTGGGGACATGTTAG
right    -----GCTGAG---GCAG--GAGAA--TGGCGTGAACCCGGGAGGCGGAGCTTG----CA-GTGAG
1         22222N111***111***111**1*1*111*111111*11***1**1*11N1**1**1**
```

```
left      ATGAAATAACCCAGGCACAGAAAAGCTCACTTCCCAGGTTCTCATTCATTTGTGGGAG-CTAAAAATTAA
chrom     ATGAAATAACCCAGGCACAGAAAAGCTCACTTCCCAGGTTCTCATTCATTTGTGGGAG-CTAAAAATTAA
right    CCGAGAT---CCCGCCACTG-----CACT--CCAGCCTGGGAGACA---GAGCGAGACTCCGTCTCAA
11**1**111**1*1***1*1111111****11***11*111*11**111*1*1***1**11111*1**
```

```
left      AACAAATTTAATTCACGGGGATAGAAAAGTAGAATG-----GGCCGGGCGCGGT----GGCTCA
chrom     AACAAATTTAATTCACGGGGATAGAAAAGTAGAATGATGGTTAACAGAGGCCGGGAAGGGTAGTGGGGTTG
right    AAAAAAAAAA-----AGAAAAGTAGAATGATGGTTAACAGAGGCCGGGAAGGGTAGTGGGGTTG
**1**111**111111111111******222222222222*****222***2222**2*22
```

```
left      CGCC--TGTA-----TCCCAGC-----ACTTTGGGAGGC---CGAGGC-----GGC CGATCA
chrom     GGGGGATGTAGGGATGATTAACAGGTACAAAATATGCAATGAAAGCAATGCAATGAATATGATCTGTTAT
right    GGGGGATGTAGGGATGATTAACAGGTACAAAATATGCAATGAAAGCAATGCAATGAATATGATCTGTTAT
2*2222***22222222*22***222222*2*2**22*2*2222*2*2**22222222*22*2*2*22
```

```
left      CGAGGTCAGGAGATCGAGACCATCC-CGGCTAAAAAACGGTGAAACCCCGTCTCTACTA
chrom     TGATAGCAGAACAAGGTGACTACAGACAGCAATAATTTGTTGTA----CATTTTCACAT
right    TGATAGCAGAACAAGGTGACTACAGACAGCAATAATTTGTTGTA----CAT-----
2**222**2*2*22*2***2*2222*2**2*2**222*2**2*2222*2*N1NN11NN
```

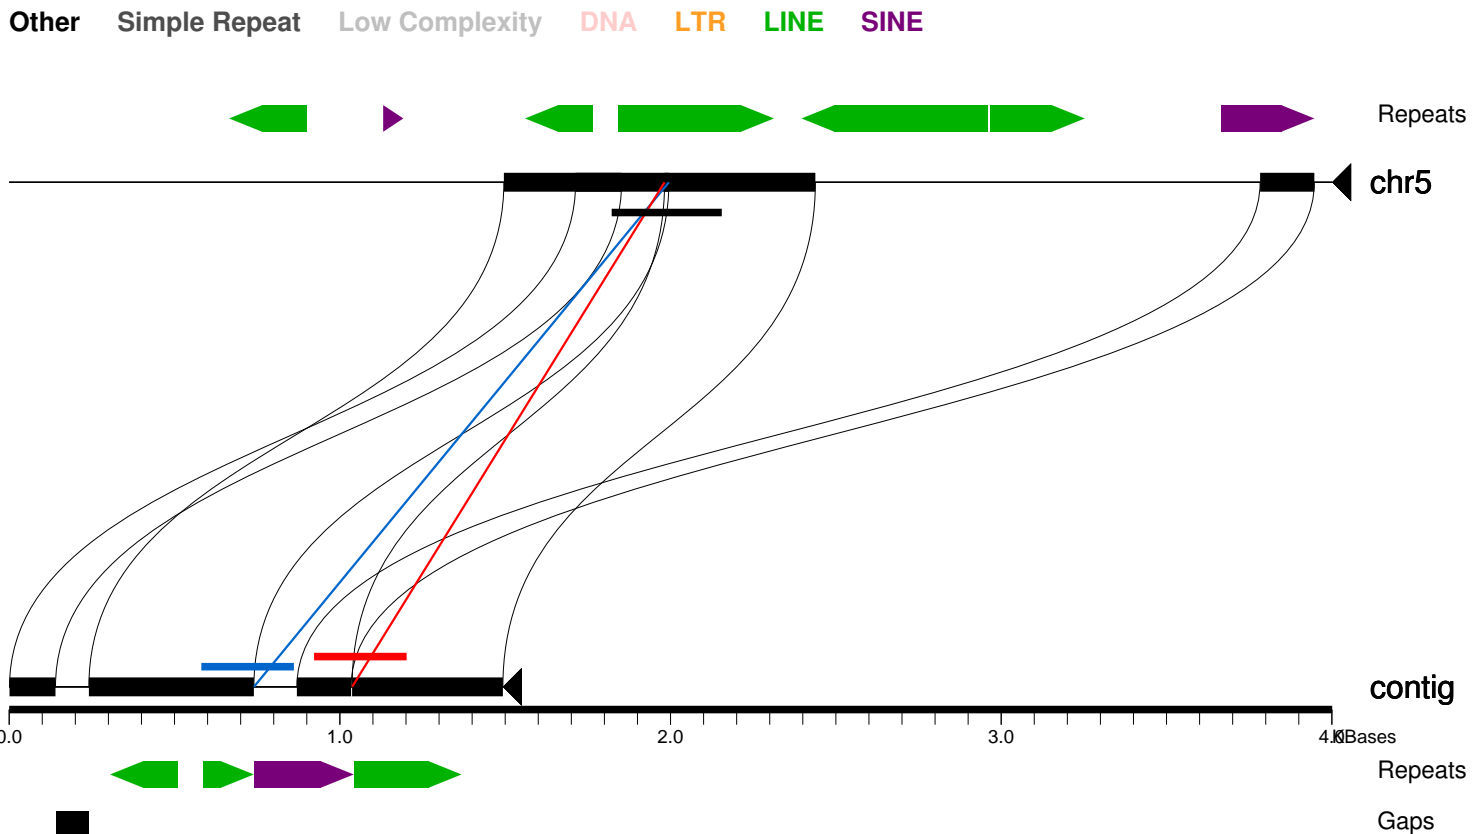

siteID: chr5\_171893757 Scaffitg1 - Breakpoint: chr5:171893734

chr5:171893709-171893793

Overlap Length: 34 INS size: 424 Genotyped: No

```

left   TCTA-----TTGCAAAATTTCTG-----CTCAGTATCCCCAGATTT
chrom  TCTA-----TTGCAAAATTTCTG-----CTCAGTATCCCCAGATTT
right  CCGCCCGCCTCGGCCTCCCAAAGTGTGGGATTACAGGCGTGAGCCACCGCGCCCGGCC*
1*1111111111111111*1*1***1*1***11111111111111111111111111111111*1*1*11*****

```

```

left   CTAACTACTTCTTCAGTCTCATTTTTNNNNNNNNNNNNNNNNNNNNNNNNNNNNNNNNNNNNNNNNNNNNNNNNNN
chrom  CTAACTACTTCTTCAGTCTCATTTTTCCATTAGAATCTTTCAGTTCAAGA-----
right  CTAACTACTTCTTCAGTCTCATTTTTCCATTAGAATCTTTCAGTTCAAGA-----
*****2222222222222222222222222222222222222222222222222222222222222222222222

```

```

left   NNNNNNNNNNNNNNNN
chrom  -----
right  -----
222222222222222

```

Other    Simple Repeat    Low Complexity    DNA    LTR    LINE    SINE

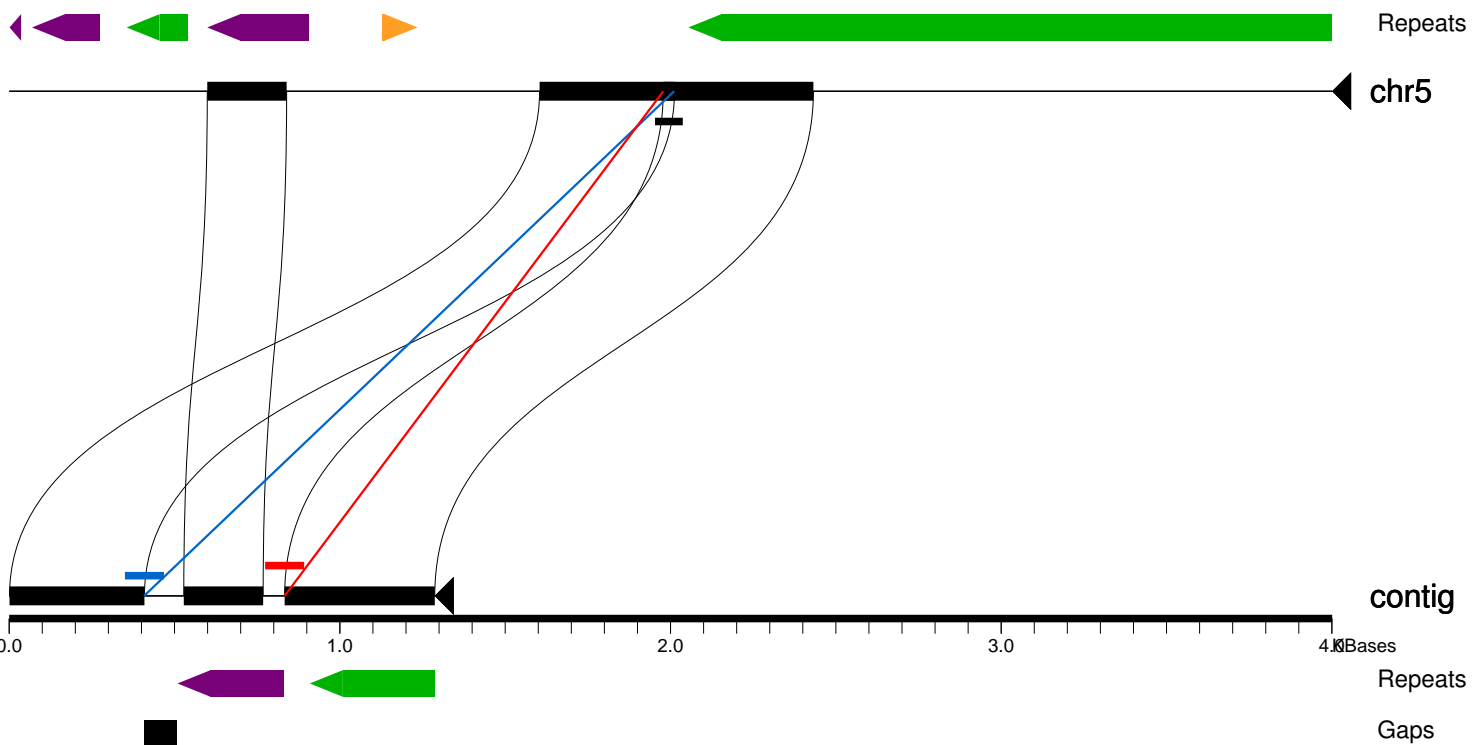

siteID: chr5\_172054825 Scafftig1 - Breakpoint: chr5:172054822

chr5:172054662-172054947

Overlap Length: 1 INS size: 462 Genotyped: Yes

```
left -----TIGCTT----TTCTTTTGA-----GTTTTATCACCTACAC
chrom CCTGCATTTTACGAT-AGG---CATTTCTTGCTT----TTCTTTTGA-----GTTTTATCACCTACAC
right TTT----TGTAGGACCAGGTTCCACCTGTTGCCTAGGCTGGTCTTGAACCTCTGGGCTTAAGCGATTAC
NN2      2N22N22N122211122NN2N****1*1111*11*1****1111111*11***11111*1***
```

```
left ACGC--TGGGCTTTGAACATCATGTAAGTGGAGTC-----CCGTAGTATGCATTCTTTTGTGTCT--
chrom ACGC--TGGGCTTTGAACATCATGTAAGTGGAGTC-----CCGTAGTATGCATTCTTTTGTGTCT--
right CTGCCTTGGCCTCCTAAAATGCTGGGATTACAGGCATGAGCCACCGTGCCCGGCCCTCTTGTGTTTTAAA
11**11***1**111**1**11**11*1*11**1*11111111****11111**11***1***1*1111
```

```
left ---GGCTTCTTT-CACAG--AACATT-ATGTGTGTGAATCACTCGGGTCG-----CTGTGATCCACATC
chrom ---GGCTTCTTT-CACAG--AACATT-ATGTGTGTGAATCACTCGGGTCG-----CTGTG-TGTA----
right AGAGAATTCATTACATAGGCATGATTGACAACAGTGCAGAAATGTGATTGGACAAAAAAGG-TATG----
111*11***1**1**1**11*11***1*11111****1*11*1*11*1*1*11111111*1*2*N212222
```

```
left GGGTCCACGTGGTCACCTCTTCAGAAGCTCTCTGAACCCTGTCTCTTGTGTGTGGTGGAGTTGTTGGCG
chrom -GCTGTATTTTGTTTTTTCTCATTACGGCATAGTATTCCACTTTGTAAGGGTCTCCTA-ACTTATTGATC
right -ACTGCATTTTGTTTTTTCTCATTACGGCATAGTATTCCACTTTGTAAGGGTCTCCTA-ACTTATTGATC
212*2N*22*2**2222***2222*2*222*22*22**22*222222*2**2*22*22*2**2***222
```

```
left GGAACGGTTGTGGGGTTGTTTTTTGAGACAGGGTCTCACTCTGTCACCAAGGCTGGAGTGCAGT
chrom CAGT-CTATAGTGA-TGGACATTTGGGT--TGTCTCAGTTTGGGGCCA-----TTTTGAA--
right CAGT-CTATAGTG-----
22*22*22*2***1N21N1NNN1111N1N22N1N1111N1N1N1NNN111222222NNN11N122
```

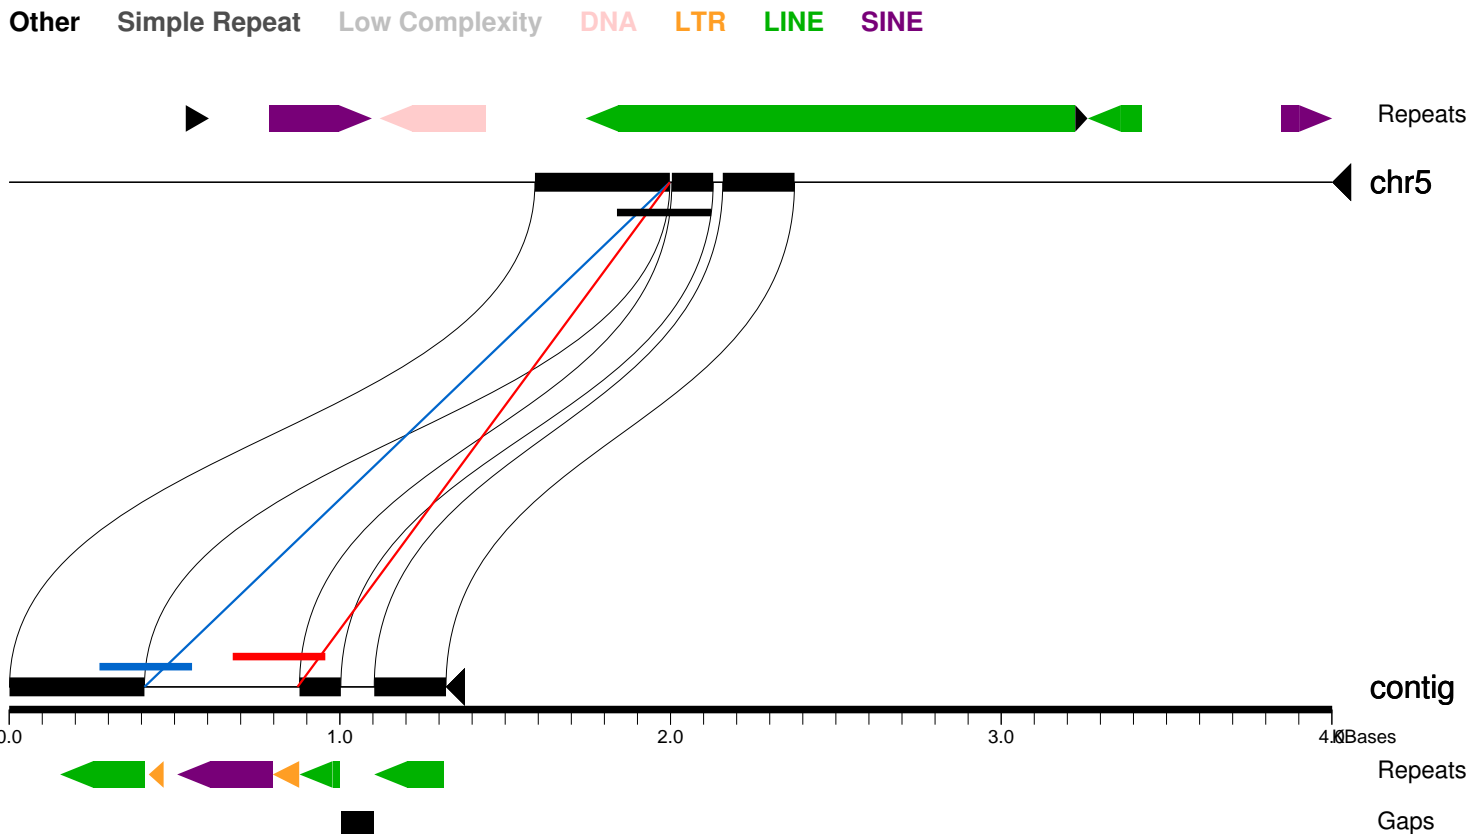

siteID: chr5\_17712601 Scaffitig4 - Breakpoint: chr5:17712608

chr5:17712563-17712667

Overlap Length: 15 INS size: 319 Genotyped: Yes

```

left   ATCTGAGACA-ATTTATTTTTCATTT-----AAATTGTTTTTATCTCTTAGAAAAATATAC
chrom  ATCTGAGACA-ATTTATTTTTCATTT-----AAATTGTTTTTATCTCTTAGAAAAATATAC
right  -TGGGCGACAGAGCGAGACTCCGTCTCAAAAAAAAAAAAAAAAAAAAAAAAAAAAAAAAAAAAAA
       1*11*1***1*111*111*1*1*1*1111111111111111***11111111*111111*1*****1****

```

```

left   ACAAGGCCGGCGCGGTGGCTCACGCCTGTAATCCACAGCACTTTGGGAGGCCGAGGCGGGCGGA
chrom  ACAAGAAATAAAGAGGTTGGATA----TGGA---GCATCATT-----AAAACTAATCTGC--AA
right  ACAAGAAATAAAGAGGTTGGATA----TGGA---GCATCATT-----AAAACTAATCTGC--AA
       *****2222222*2***2*222*2222**2*2222**2**2*22222*222*2*22*2*2222*

```

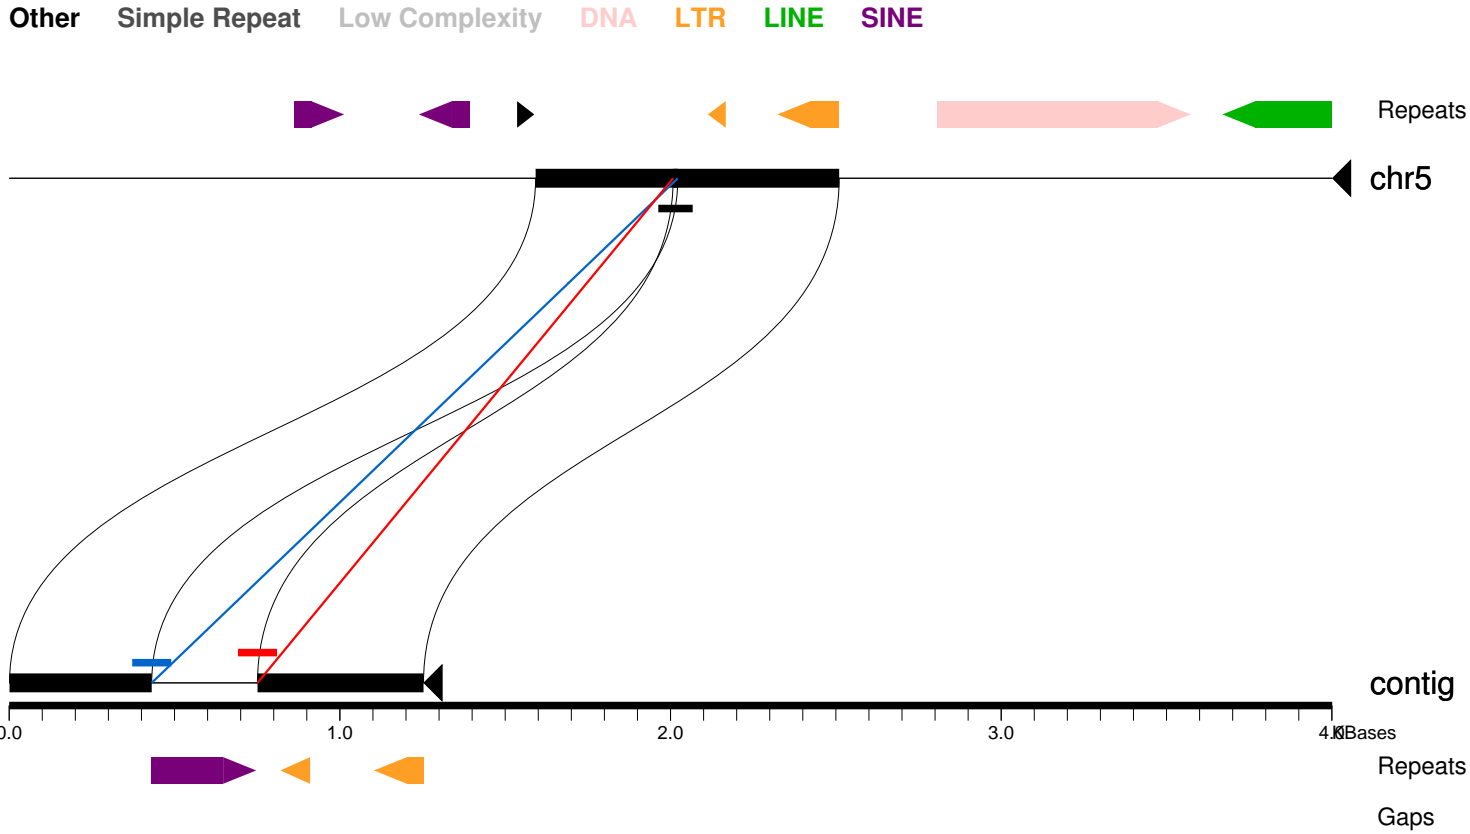

siteID: chr5\_179369169 Scafftig2 + Breakpoint: chr5:179369169

chr5:179369009-179369345

Overlap Length: 17 INS size: 171 Genotyped: Yes

```
left -----GCACAACCTCTGATACAGTTTATTTTCAGTTTCTTCACATCATGCCAATAAATATTC
chrom ATAAACTCCCCATGGGCACAACCTCTGATACAGTTTATTTTCAGTTTCTTCACATCATGCCAATAAATATTC
right AGAA-----TGGCGTGAACCCGGGAGGCGGAGCTTGCAGTGAGCCGAGATTGCGCCACCGCAC--TC
2N22 2221111***1*1*11111*1111**1****111111*1**111****1111*111**
```

```
left CATTAAATTG-AGTTG-AGTGGGATGTACT-ATTCTAATTAGAGTCACTAATTTGTGTCCAAATAGGT
chrom CATTAAATTG-AGTTG-AGTGGGATGTACT-ATTCTAATTAGAGTCACTAATTTGTGTCCAAATAGGT
right CA--ACCTGGGAGACACAGCGAGACTCCGTCTCAAAAAAAAAAAAAAAAAAAAAAAAAAAAAAAAAAAAA
**11*11*1*1**1111**1*1**111111**1*1111**11*1*111*11**111111111**1*111
```

```
left TTCACTTAGAACCATCTCAGTATGAAATAAAGAGGGCACA---CTTGGGAGGCTGAGGCAG--GAGAA
chrom TTCACTTAGAACCATCTCAGTATGAAATAAAGAGGGCACA---CTTGGGAGGCTGAGGCAG--GAGAA
right AAAAAAAAAAAAAAAAAAAAAAAAAAAGAAATAAAGAGGGCACA---CTTGGGAGGCTGAGGCAG--GAGAA
111*111*1**11*1111*11*1*****22222*22*222***2*2**22**2**
```

```
left T-----GGCGTGAACCCGGGAGGCGGAGCTT--GCAGTGAGCCG-----AGATTGCGCCAC
chrom TTAACCAGCAGTTGTTATTTCTGTACCATCAGTTATGGTAGTTAGACGGCTTTAATGAAGATTACA--AA
right TTAACCAGCAGTTGTTATTTCTGTACCATCAGTTATGGTAGTTAGACGGCTTTAATGAAGATTACA--AA
*222222222*22**2*222*2*2*22222**2*222*2***2**2**222222222*****2*222*2
```

```
left CGCACTCCA-ACCTGGGAGACACAGC---GAG-ACTCCGTCTCAAAAAAAAA-----A
chrom GGTTTTAAATAAAGAAACACTCATCAGTTGAGGACTGATTCATATACAATGCATTTATCA
right GGTTTTAAATAAAGAAACACTCATCAGTTGAGGACTGATTCATATACAATGCATTTATCA
2*222*22*2*2**NN1N11N1N1 111 111NNN11NNN1N1N11 1
```

Other Simple Repeat Low Complexity DNA LTR LINE SINE

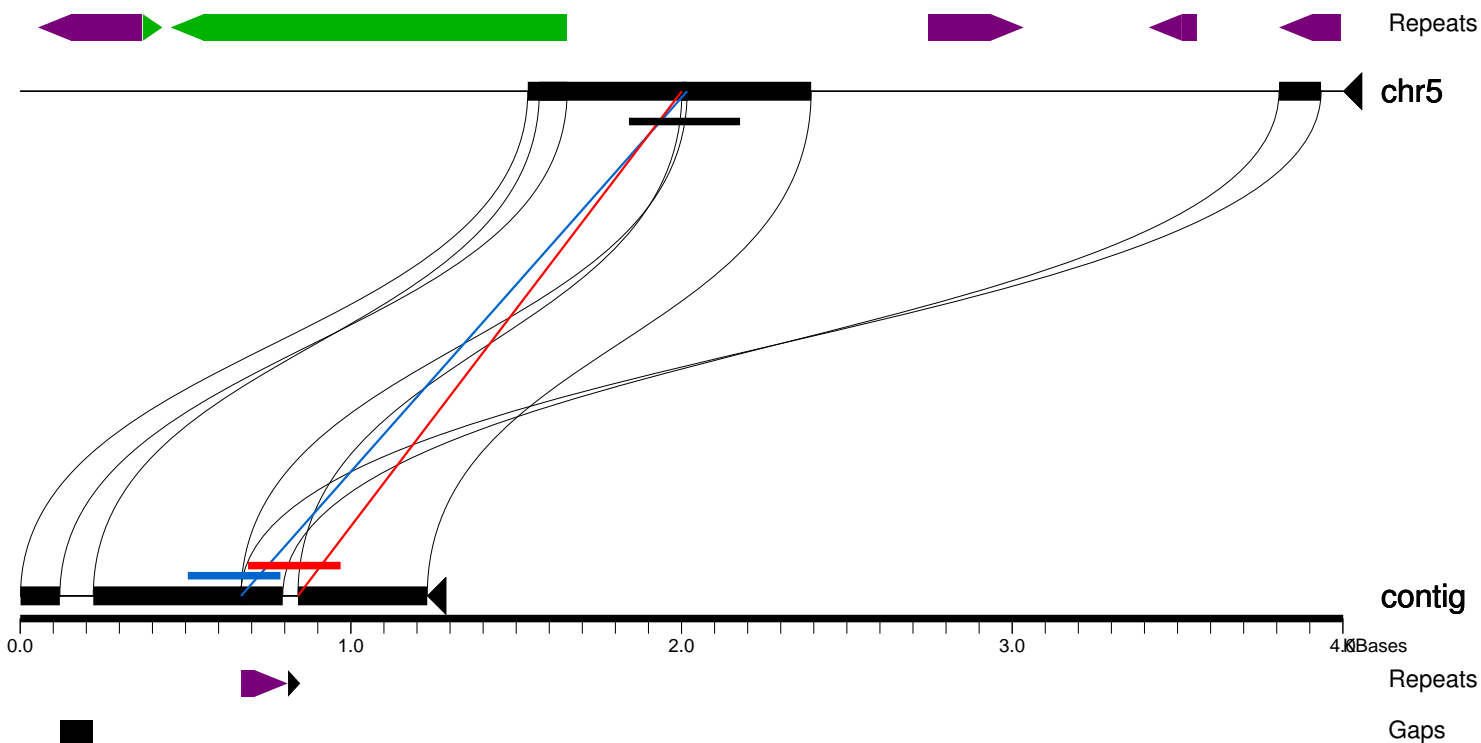

siteID: chr5\_180349611 Scaffitig1 - Breakpoint: chr5:180349598

chr5:180349545-180349651

Overlap Length: 7 INS size: 309 Genotyped: Yes

```
left  -----TG-----GTCTGAGAGAGCGGTTGTTATGATTTTCAGTTCTTTTGCATTTGCTAAGAAGTGTTT
chrom -----TG-----GTCTGAGAGAGCGGTTGTTATGATTTTCAGTTCTTTTGCATTTGCTAAGAAGTGT
right GCCACTGCACTCCAGCCTGGGCGACAGAGCGAGACTCCGTCTCAAAAAAAAAAAAAAAAAAAAAAAAAAAATGTTT
      111111**11111111*1***1*1**11*111*11*111111**111111111111*111111**1**1*****

left  TGGGCCGGGCGCGGTTGGCTCACGCCTGTAATCCCAGCACTTTGGGAGGCCGAGGCGGGCGG
chrom TGTGTCTGATTATGTGG-TCAG--TTTTAA----AGTA-TGTGCTATGTAGTGATAA----
right TGTGTCTGATTATGTGG-TCAG--TTTTAA----AGTA-TGTGCTATGTAGTGATAA----
      **2*2*2*22222*****2***2222*2***2222**2*2*2**22*2*22*2*22222222
```

Other Simple Repeat Low Complexity DNA LTR LINE SINE

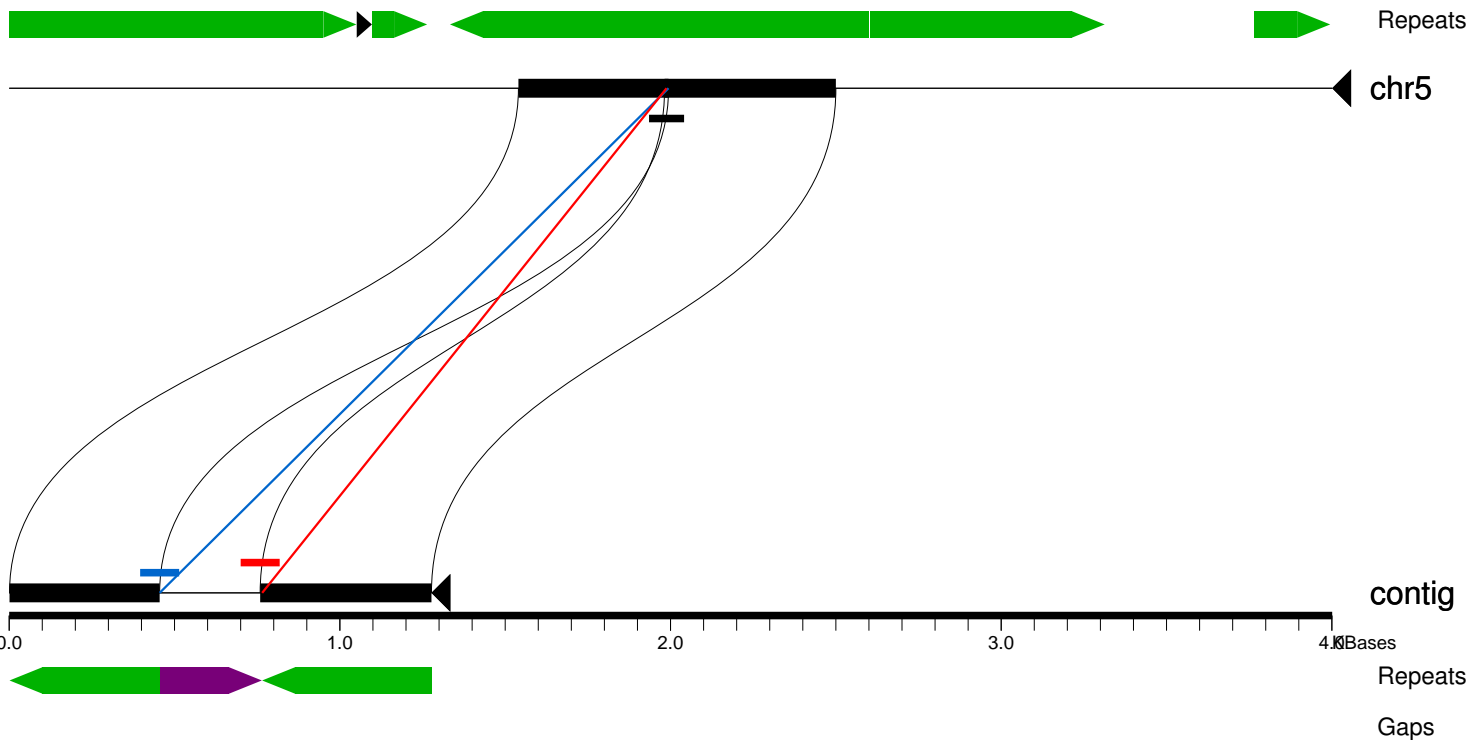

siteID: chr5\_180368838 Scafftig2 - Breakpoint: chr5:180368896

chr5:180368736-180369074

Overlap Length: 19 INS size: 106 Genotyped: Yes

```
left -----TGATATAAACTCTCAACAGTTTAGATGTAGAAGAAATGTACCTCA-ACACAAT
chrom AAATTC AACATCCTGCATGATATAAACTCTCAACAGTTTAGATGTAGAAGAAATGTACCTCA-ACACAAT
right ---TTTACTACTCTTTTTTTTTTTTTTTTTTTTTTTTTTTT-----TTTTTTTTTGAGACGGAGTCTCGCTGTCACCCAGG
      22N2NN2NN22NNN*11*1*11111*1*111111***111*11***1*1*1*1*11**111**1**11
```

```
left CAAGGTCACATATGACAAAACCTCACAGCTAACATCATAACAGAAATGGGGAAAAAGTTGAAAAGCTTTTCAATAA
chrom CAAGGTCACATATGACAAAACCTCACAGCTAACATCATAACAGAAATGGGGAAAAAGTTGAAAAGCTTTTCAATAA
right CTGGAGTGCAG-TGGCGCAATCTCGGCTCAC-----TGCAGGCT-----
      *11*11111**11**1*11*1**1*1***1**11111111111111111111111111111111**1*1***1111111111
```

```
left GAACTGGAACAAGACAAGGATGCCCACTTTTACTACTCTTTTTTTTTTTTTTTTTTTTTTTTTTTTGTAGACG
chrom GAACTGGAACAAGACAAGGATGCCCACTTTTACTACTCTTATTCAACAAAAGTACTGGAAGTCCT-AGCCG
right ---CCGCCCCCTGGGGTTTACGCCCACTTTTACTACTCTTATTCAACAAAAGTACTGGAAGTCCT-AGCCG
      111*1*111*11*1111111*1*****2**22222222*22*22222*22*2**2**
```

```
left GAG---TCTCGC-----TGTCACCCAGGCTGGAGTGCAGT--GGCGCAATCTCGGCTCA
chrom GAGCAATCAGGCAAGAGCAAAAAATAAATGGCATCTAAATTTGGAAAAGGAGAAAAGTCTAATTGTCC-CTGT
right GAGCAATCAGGCAAGAGCAAAAAATAAATGGCATCTAAATTTGGAAAAGGAGAAAAGTCTAATTGTCC-CTGT
      ***222**22**2222222222222222**2**2*2*222****22*2**222*2*22*2*2**22**22
```

```
left CTGCAGGCTCCGCCCTGG-----GGTTCACGCCCA-----CTTTTACT-
chrom TTGCAGACAACATGATCTTTATATAAAAAAACTAAAAGATTCATCAAAAAAACCTCTTAGAA
right TTGCAGACAACATGATCTTTATATAAAAAAACTAAAAGATTCATCA-----
      2****2*22*22222**2222222222222222222*2**222*2N1      11N111NN
```

Other Simple Repeat Low Complexity DNA LTR LINE SINE

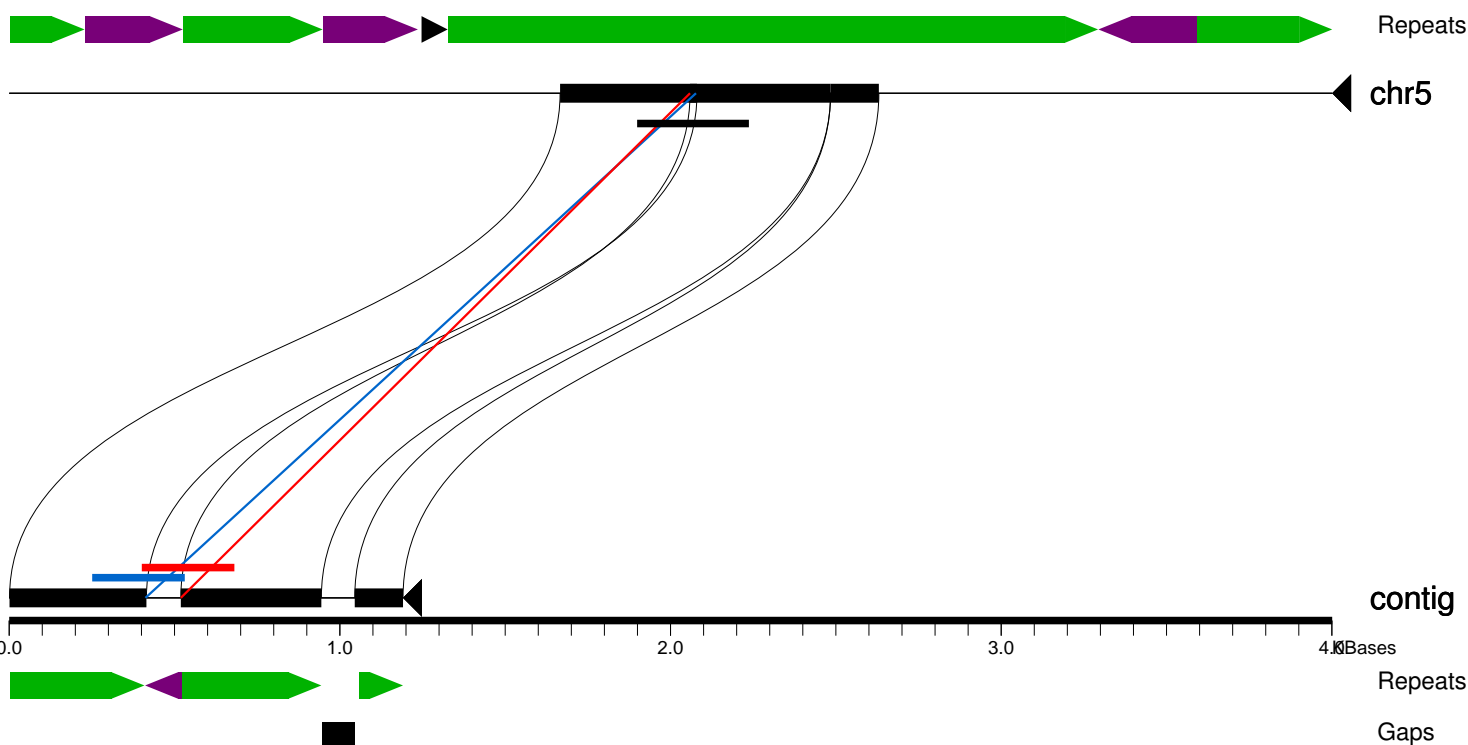





siteID: chr5\_18570175 Scafftig4 + Breakpoint: chr5:18570156

chr5:18570105-18570215

Overlap Length: 9 INS size: 305 Genotyped: Yes

```
left  CAGT-----GAATGCTAATAGAAATATGAATATTTTAAATTTTTTCCCCTTCCATGTGAAACTATTTT
chrom CAGT-----GAATGCTAATAGAAATATGAATATTTTAAATTTTTTCCCCTTCCATGTGAAACTATTTAA
right CCACCCGCCTCGGCCTCCCAAAGTGCTGGGATTACAGGCGTGAGCCACCGCGCCCGGCCGAAACTATTAA
      *111111111111*11*1*1**11111*11**1**1111111111111*1*11**1111*****22
```

```
left  TTTTTTTTTTTTTTGAGACGGAGTCTCGCTCTGTCGCCAGGCTGGACTGCGGACTG
chrom TTGAT-----ATGAAAAACCTCCGCAGAAAAGAGAGAAAAGTGATAATGTGGAAT-
right TTGAT-----ATGAAAAACCTCCGCAGAAAAGAGAGAAAAGTGATAATGTGGAAT-
      **22*22222222***2*222222*2*22222*222222*2*2222*2**2***2*2
```

Other Simple Repeat Low Complexity DNA LTR LINE SINE

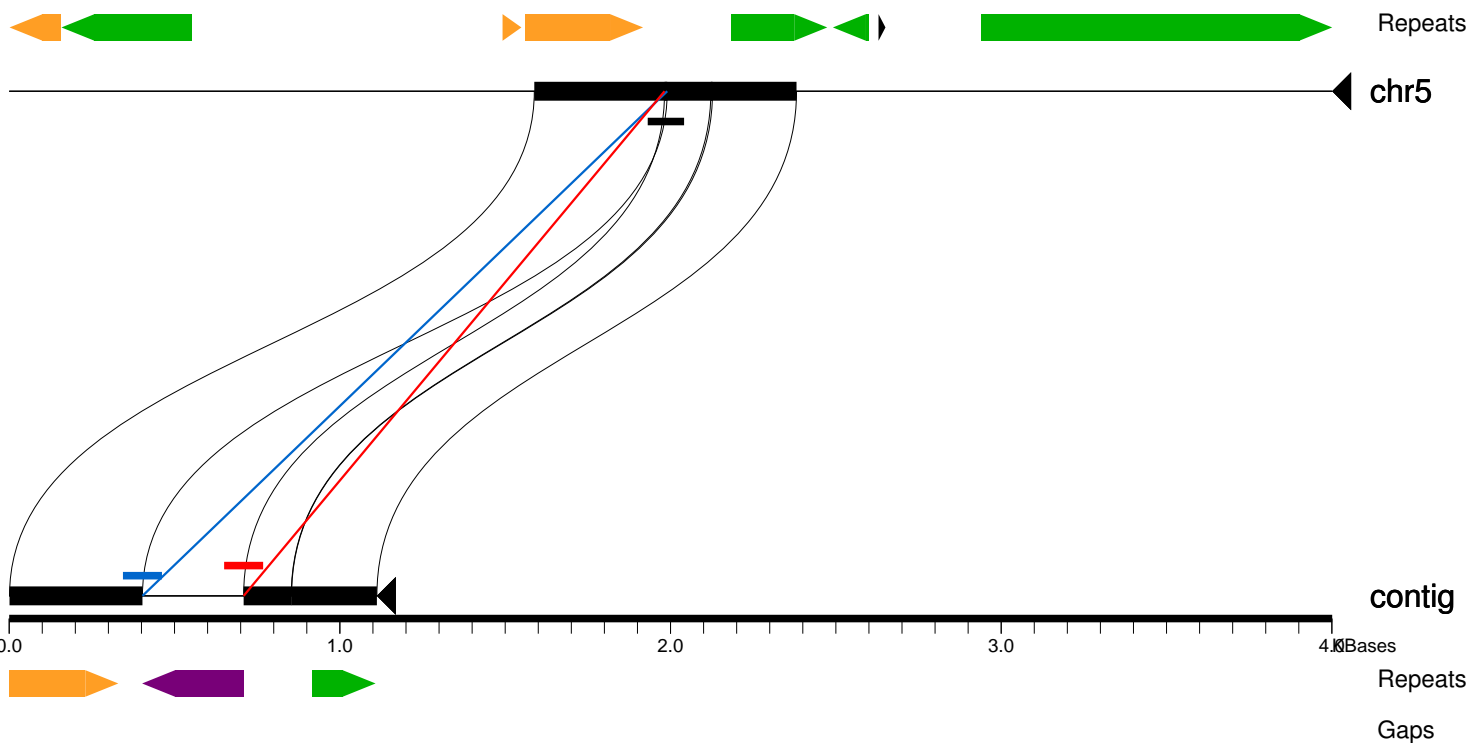













siteID: chr5\_32762571 Scafftig2 + Breakpoint: chr5:32762563

chr5:32762519-32762622

Overlap Length: 16 INS size: 318 Genotyped: Yes

```
left  GT----GTAAAGGCATTCCCTATTTTC-----TCCA--CATCCTCTCCAGCATCTGT--TGTTTCCTGAT
chrom GT----GTAAAGGCATTCCCTATTTTC-----TCCA--CATCCTCTCCAGCATCTGT--TGTTTCCTGAT
right CCACCCGCCTCGGCCTCCCAAAGTGCTGGGATTACAGGCGTGAGCCACCGCGCCCGGCCCTGTTTCCTGAT
      1111111*11111***1*1**1*11*111111111*1**11*1*111*11*1**11*1*111*****
```

```
left  TTTT*TTTTTTTTTTTTTTTTTTTTTTTTTTTTTTTTTTTTTTTGGAGACGGAGTCTCGCTCTGTCGCCAGGT
chrom TTTT*TAATGATCACCATTCTAACTGG-----CGTGAGGTGGTATCTCATTGTGG-----
right TTTT*TAATGATCACCATTCTAACTGG-----CGTGAGGTGGTATCTCATTGTGG-----
      *****22*22*22222**2*222*22222222222*2**2*22**2**2*22***2*2222222
```

Other Simple Repeat Low Complexity DNA LTR LINE SINE

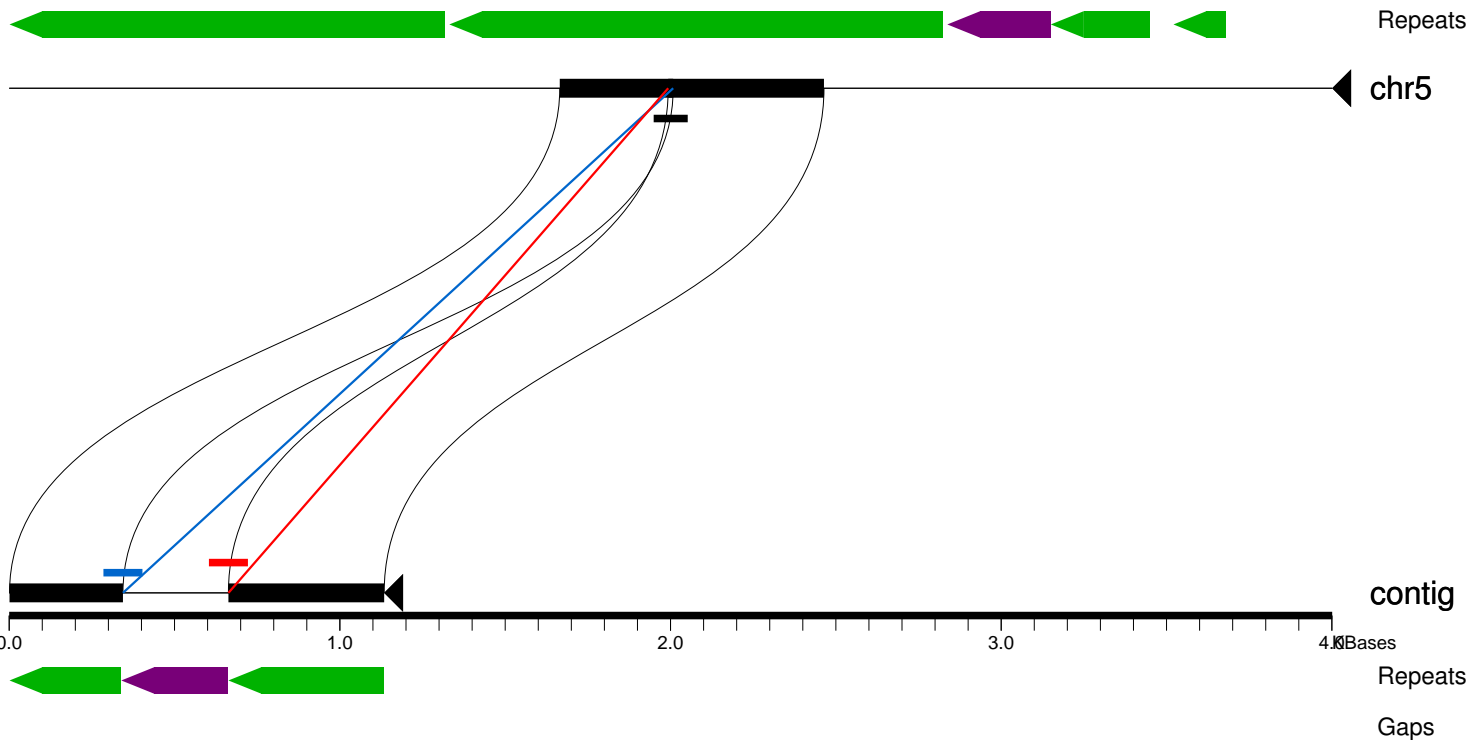



siteID: chr5\_34459553 Scaffitig4 - Breakpoint: chr5:34459553

chr5:34459506-34459612

Overlap Length: 13 INS size: 305 Genotyped: Yes

```
left  ATCTTCTACCAGGCCTG-ATAGTAAGGCTTT-----AATTGCTGTCAGTGTTTAAGATTTAAC
chrom ATCTTCTACCAGGCCTG-ATAGTAAGGCTTT-----AATTGCTGTCAGTGTTTAAGATTTAAC
right A-CTCCAGCCTGGGCGACAGAGCGAGACTCGTCTCAAAAAAAAAAAAAAAAAAAAAAAAAAAAAAAAGATTTAAC
      *1**1*11**1**1*111*1**11**1**111111111111111**11111111*111111******
```

```
left  AGGGGCCGGGCGCGGTGGCTCACGCCTGTAATCCCAGCACTTTGGGAGGCCGAGGCGGGCAG
chrom AGGA-CTTGGTGTGTTTTT-AGACCCAGAGTCAAAGCCCTGT---AACTCAATG-----
right AGGA-CTTGGTGTGTTTTT-AGACCCAGAGTCAAAGCCCTGT---AACTCAATG-----
      **22*22**2*22**222*2*22**222*2**22**2**2*222*222*2*2*2222222
```

Other Simple Repeat Low Complexity DNA LTR LINE SINE

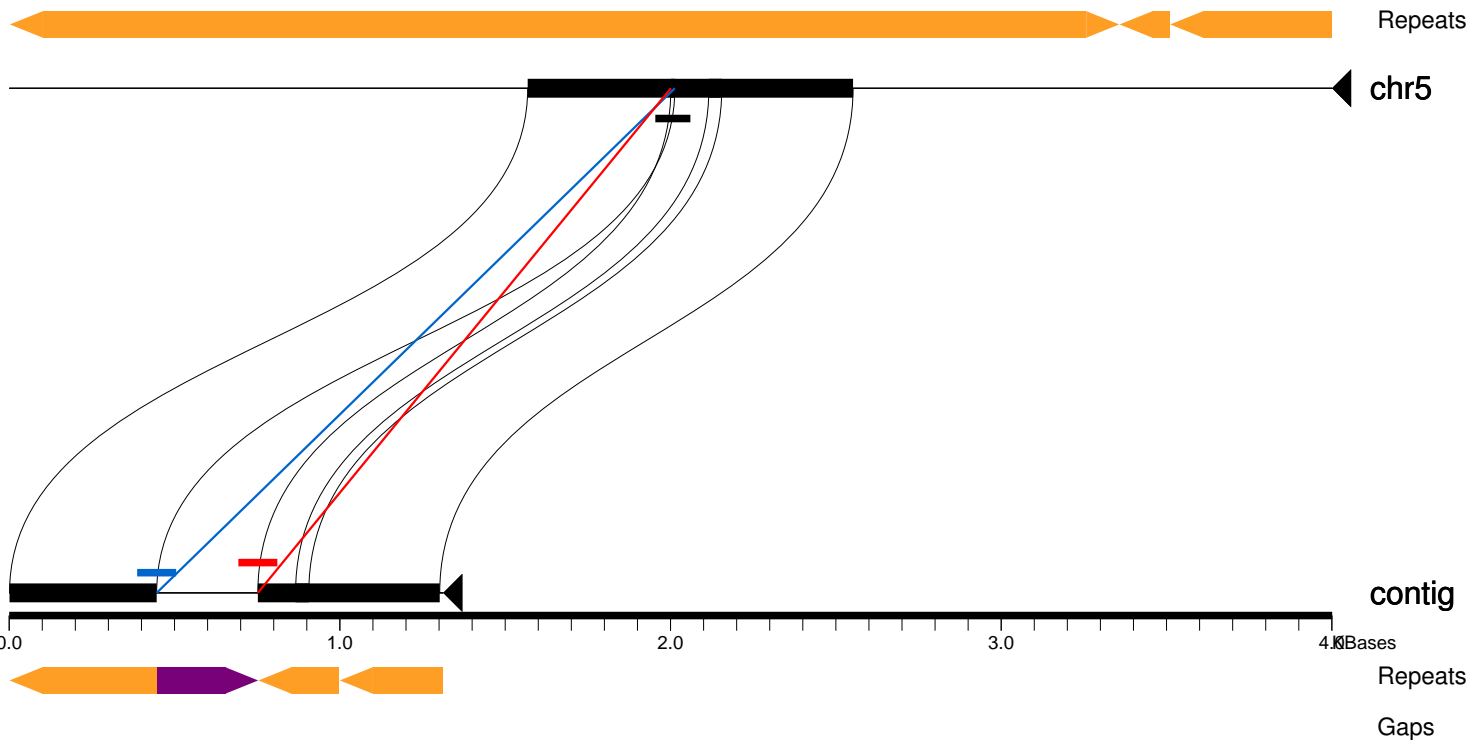





siteID: chr5\_37648674 Scaffitig1 - Breakpoint: chr5:37648659

chr5:37648613-37648717

Overlap Length: 14 INS size: 305 Genotyped: Yes

```
left  -AGA-----GAACTATTCTTTT-AGTGGTAATC--TCTTGGTAGTTCAGTTGTTA-GAAGTCACTG
chrom -AGA-----GAACTATTCTTTT-AGTGGTAATC--TCTTGGTAGTTCAGTTGTTA-GAAGTCACTG
right CAGTCCGCAGTCCGACCTGGGCGACAGAGCGAGACTCCGTCTCAAAAAAAAAAAAAAAAAAAAAA-GAAGTCACTG
      1**11111111111**1**111*11111**1*11*1**11***1111*1111*1111111*1*****
left  TAAAGGCCGGGCGCGGTGGCTCACGCCTGTAATCCCAGCACTTTGGGAGGCCGAGGCGGGTGG-
chrom TAAA-----TAACACCAACAAACATGGTTTTTACCAATCTTGTGCCATCTGGA
right TAAA-----TAACACCAACAAACATGGTTTTTACCAATCTTGTGCCATCTGGA
      ***2222222222222222*2**2**222**2*222*222**2222*2222*2*2*222***2
```

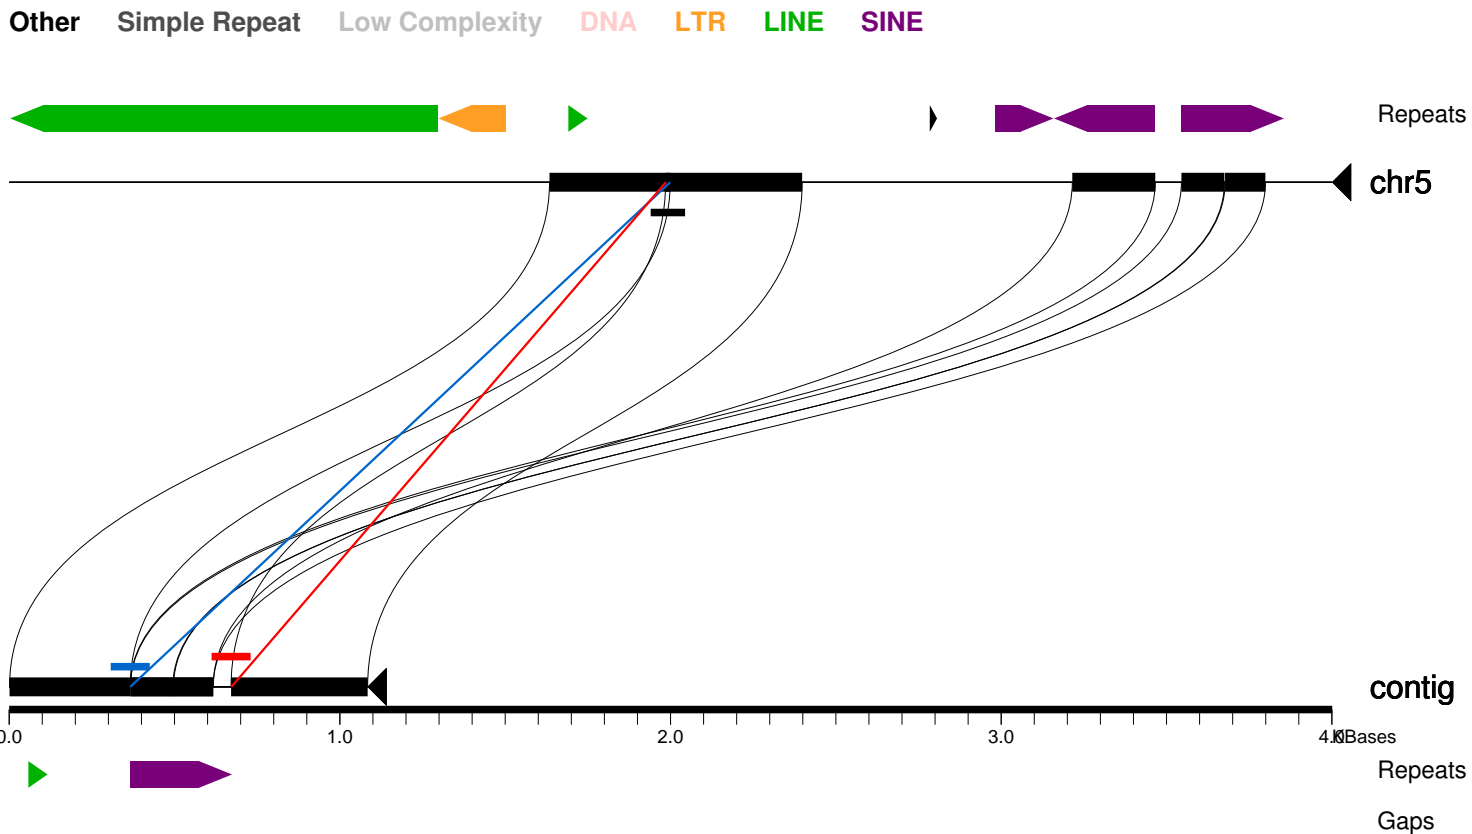

siteID: chr5\_37688818 Scaffitg5 - Breakpoint: chr5:37688796

chr5:37688636-37688971

Overlap Length: 16 INS size: 266 Genotyped: Yes

```

left -----GTTTCATTTAGAGTTTAGTAGTTGGTAACTTGATGGGATATAAGGAAGTGGCAA
chrom ATAAGATCTTCCAAAAGTTTCATTTAGAGTTTAGTAGTTGGTAACTTGATGGGATATAAGGAAGTGGCAA
right GGCAGG-----AGAATGGCGT---GAACCCGGGAGGCGG-AGCTTGCAGTGAGCCGAG-ATCCCGCCA
NNN22N          2N21*11*1*111**11111*1**11**1*1****11*1**1111**1*1111**1*
  
```

```

left ATTTTCCTTATTGAGGTTGGTAG-CAGAGTTTCGTTTGTCTAGGAACAGAAATATTCCCAGTCTGTTTAC
chrom ATTTTCCTTATTGAGGTTGGTAG-CAGAGTTTCGTTTGTCTAGGAACAGAAATATTCCCAGTCTGTTTAC
right CTGCAC----TCCAGCCTGGGCGACAGAG-----CGAG-----ACTCC--GTCTCAAAAA
1*111*1111*11**11***11*1*****11111111111*1**111111111*1***11***1111*1
  
```

```

left ATGTGTTTCAGAAATGATCATTTAAAAATAAGCAAATTTCACTTTGGGAG--GCCGAGGCGGGCGGATCACG
chrom ATGTGTTTCAGAAATGATCATTTAAAAATAAGCAAATTTAGGTTTCCAAGATGGCCAAATAGGAACAGCTCT
right A-----AAAAAAAAAAAAAATAAGCAAATTTAGGTTTCCAAGATGGCCAAATAGGAACAGCTCT
*11111111*1**11*11*111*****222**222**22*2*2*2222**222*2*2*2
  
```

```

left AGGTCAGGAGATC-----GAGACC-ACCCCG--GCTA---GAATGGTGAAACCCCGTCT-----CTAC
chrom -GGTCTGCAGCTCCAGTGTGATCGACGCAGAAGATAAAGTGAATTTCTGCATTTCCAGCTGAGGCACCTGG
right -GGTCTGCAGCTCCAGTGTGATCGACGCAGAAGATAAAGTGAATTTCTGCATTTCCAGCTGAGGCACCTGG
2****2*2**2**22222*2**2*2**2*2*22*2**222**2*22**2*222**22**222222**22
  
```

```

left TAAA----AATACAAAAAATTAGCC---GGGCGTAG----TGGCGGGCG-----
chrom TTCATCTCATTTGGGACTGGTTGGACAGTGGGTGCAGCCCATGGAGGGGGCAAGCCAAA
right TTCATCTCATTTGGGACTGGTTGGACAGTGGGTGCAGCCCATGGAGGG-----
*22*2222*2*222*2222**2*2*222**2*2**222**2**2**N1
  
```

Other    Simple Repeat    Low Complexity    DNA    LTR    LINE    SINE

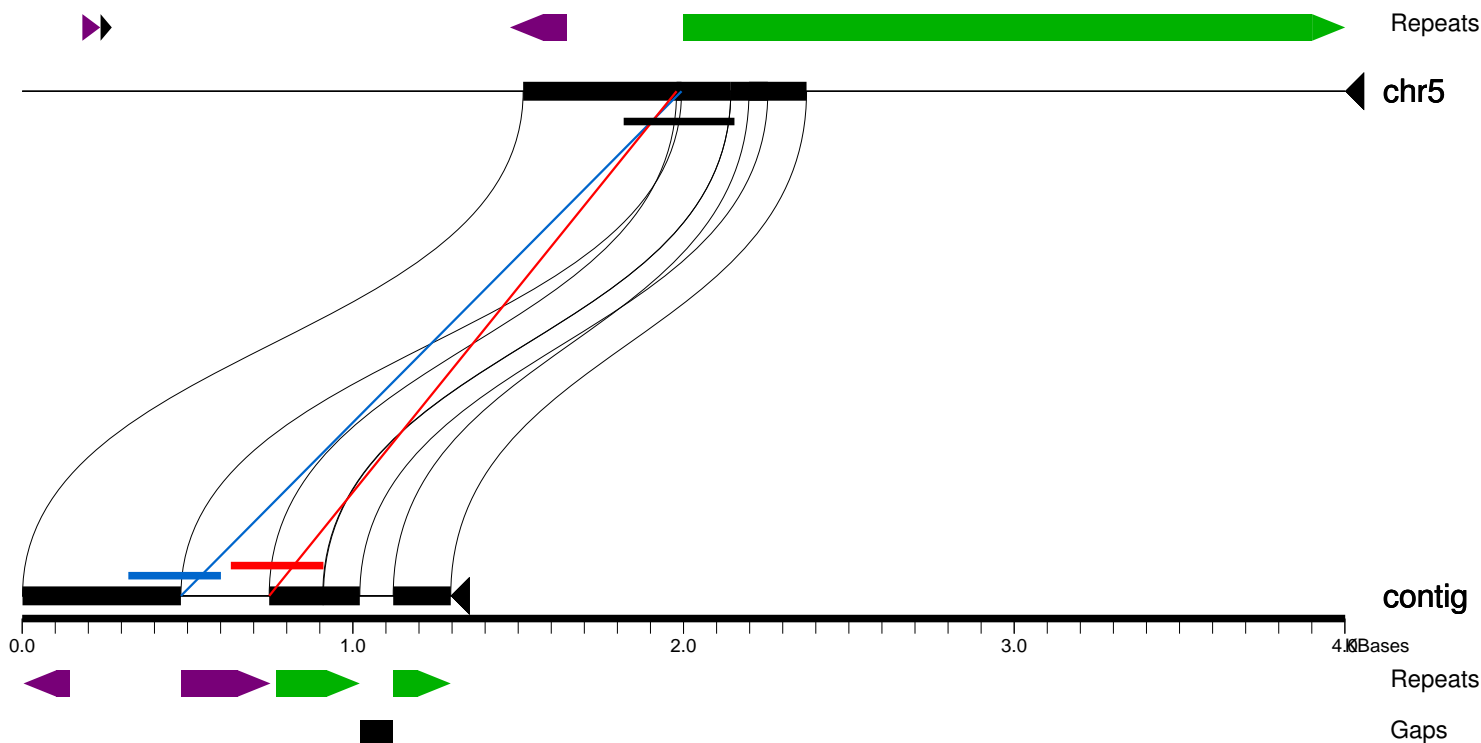

siteID: chr5\_39292977 Scaffitig1 - Breakpoint: chr5:39292970

chr5:39292921-39293029

Overlap Length: 11 INS size: 428 Genotyped: No

```
left   GCA---GACTATGAT----AAATTA--AGGATGTATATTGTGAATCATAT-GTTATAGAGTAAAAAATAT
chrom  GCA---GACTATGAT----AAATTA--AGGATGTATATTGTGAATCATAT-GTTATAGAGTAAAAAATAT
right  CCACCCGCCTCGGCCTCCCAAAGTGCTGGGATTACAGGCGTGAGCCACCGCGCCCGGCCGTAAAAAATAT
       1*1111*1*11*111111***1*1111****1111111***11*1111*1111111*******
```

```
left   ATATNNNNNNNNNNNNNNNNNNNNNNNNNNNNNNNNNNNNNNNNNNNNNNNNNNNNNNNNNNNNNNNN
chrom  TTTTAAAAAGAGACATGAGTAATATATCAATACTGGAAATAAAATGGAA-----
right  TTTTAAAAAGAGACATGAGTAATATATCAATACTGGAAATAAAATGGAA-----
       2*2*222222222222222222222222222222222222222222222222222222222222222222
```

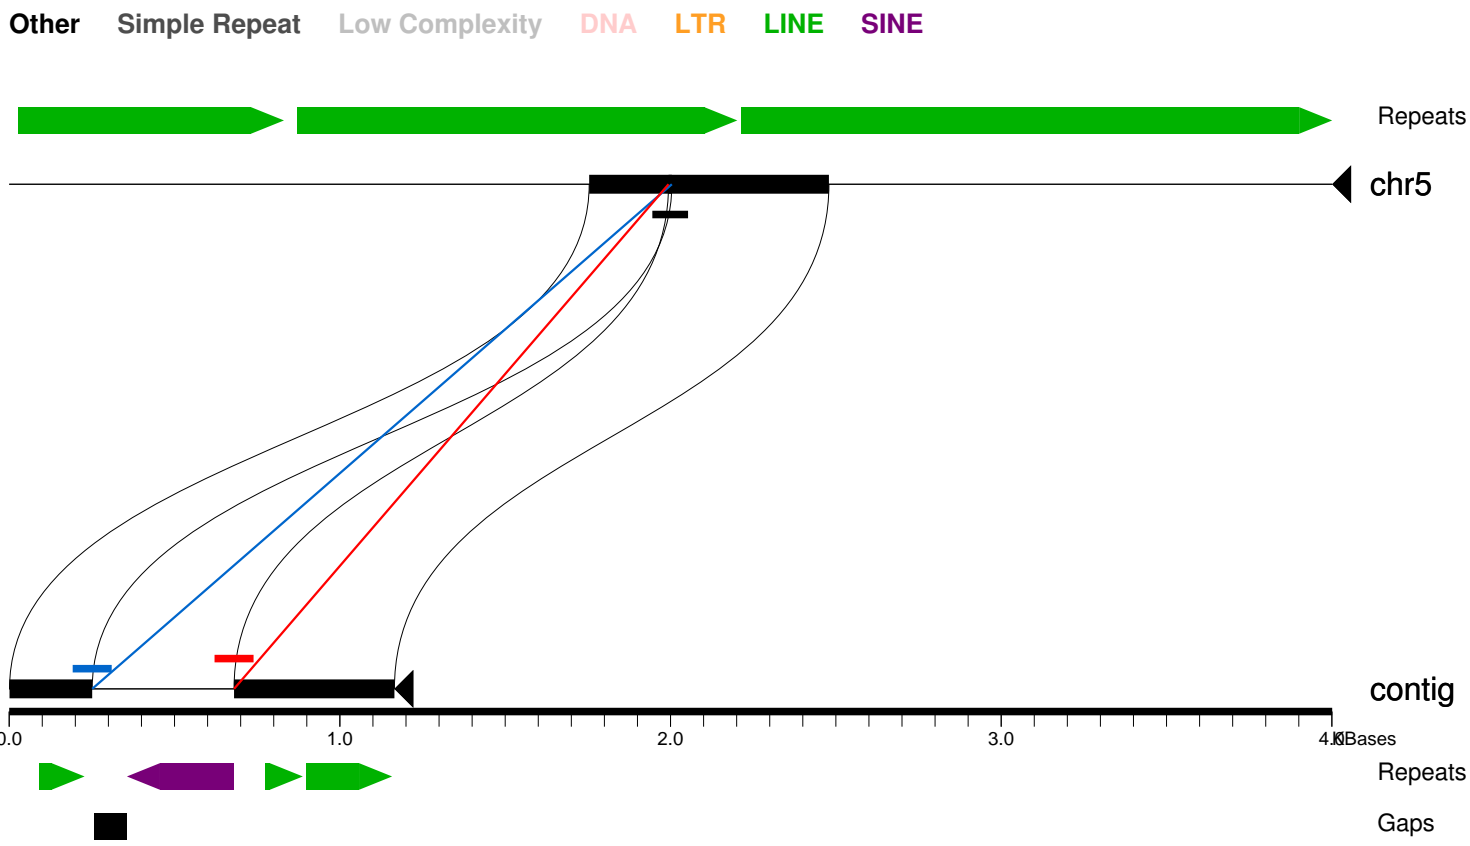

siteID: chr5\_39505879 Scaffitg1 - Breakpoint: chr5:39505860

chr5:39505809-39505919

Overlap Length: 9 INS size: 411 Genotyped: No

```
left -----TAGATGATAGAAGTTACTGAATTTGTCAAGTCCATAAGACAA---GTATGAAAAGATTAAT
chrom -----TAGATGATAGAAGTTACTGAATTTGTCAAGTCCATAAGACAA---GTATGAAAAGATTAAT
right CCGCCCGCCTCGGCCTCCCAAAGTGCTGGGATTA-CAGG--CGTGAGCCACCGCGCCCGGCC-GATTAAT
      1111111111*1*11111111**11*1***111**11**1*11*1*1**1**1111*111*1111*****
```

```
left TTNNNNNNNNNNNNNNNNNNNNNNNNNNNNNNNNNNNNNNNNNNNNNNNNNNNNNNNNNNNNNNNNNNNNNN
chrom TTCTTATATCTGGGAATGGAATAAGCAACAGAGGTGGGAAGTTTGGCCTGTGA-----
right TTCTTATATCTGGGAATGGAATGAGCAACAGAGGTGGGAAGTTTGGCCTGTGA-----
**222222222222222222222222222222222222222222222222222222222222222222222222
```

Other Simple Repeat Low Complexity DNA LTR LINE SINE

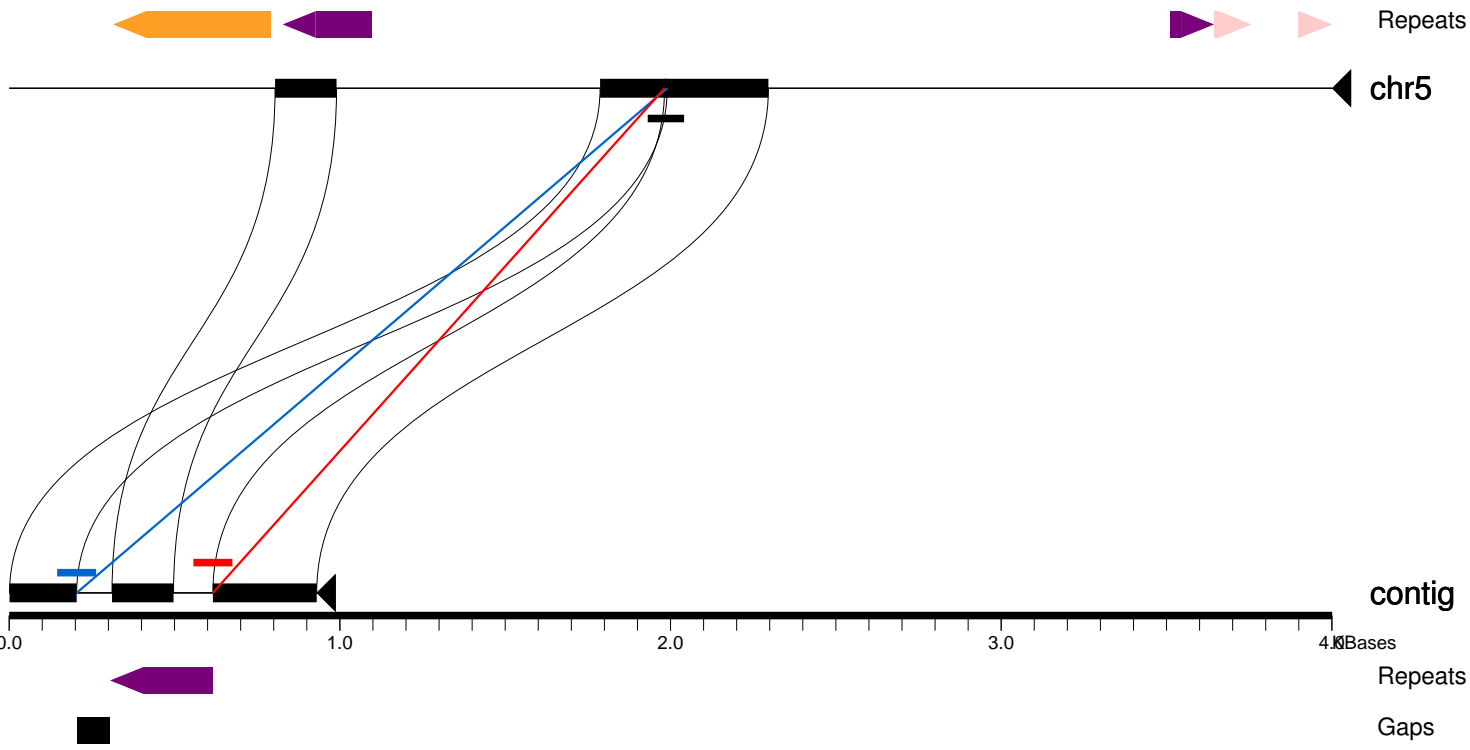





siteID: chr5\_40181646 Scaffitig4 + Breakpoint: chr5:40181650

chr5:40181599-40181709

Overlap Length: 9 INS size: 297 Genotyped: Yes

```
left  TATTAAAAAGTCGGGAAACAATAGATGCTGC----AGAGGA-TGTG-----GAGAAATAGGAACACTTTT
chrom TATTAAAAAGTCGGGAAACAATAGATGCTGC----AGAGGA-TGTG-----GAGAAATAGGAACACTTTT
right CCGCCCGCC-TCGGCCTCCCAAAG-TGCTGGGATTACAGGCGTGAGCCACCGCGCCCGGCCAACACTTTT
      111111111111****1111*1*1*1*****11111*1***11**1*11111*1*1111111*1*****
```

```
left  TTTTTTTTTTTTTTTTTTGGAGACGGAGTCTCGCTCTGTTCGCCAGGCTGGAGTGCAGTGGC
chrom ACACCATTGG-----TCAAAATGTAAATTAGTTCAAT-----GATTGTGGATGACAGTGTG
right ACACCACTGG-----TCAAAATGTAAATTAGTTCAAT-----GATTGTGGATGACAGTGTG
      2222221*222222*22*2*2*2*222*2*2**22*22222*222*****222*****22
```

Other Simple Repeat Low Complexity DNA LTR LINE SINE

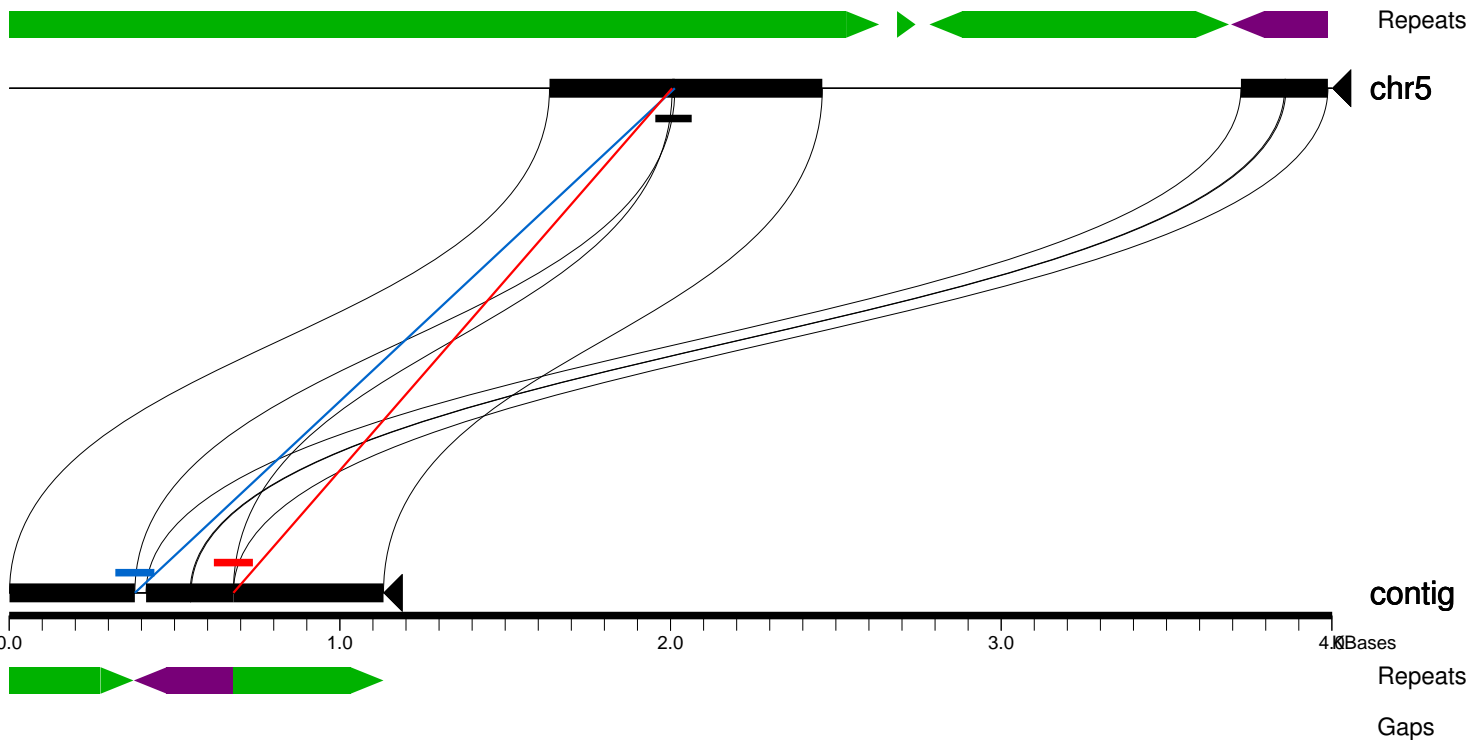

siteID: chr5\_45258061 Scaffitg1 - Breakpoint: chr5:45258051

chr5:45258007-45258110

Overlap Length: 16 INS size: 240 Genotyped: No

```
left    ---TCAGCAT-TCCA----TTCTATAAGGCCCATGTTTCTTTCCCATGGTAC-----AGTATGAGTAC
chrom   ---TCAGCAT-TCCA----TTCTATAAGGCCCATGTTTCTTTCCCATGGTAC-----AGTATGAGTAC
right   TGGTCTCGATCTCCTGACCTCGTGATCCGCCCGCCTCGGCCTCCCAAAGTGCTGGGATTAGTATGAGTAC
        111**111**1***11111*11*11111****111*11111*****11**1*1111111******
left    TTTTNNNNNNNNNNNNNNNNNNNNNNNNNNNNNNNNNNNNNNNNNNNNNNNNNNNNNNNNNNNNNN
chrom   TTTT-----AAAGTAGGTGAACATAAAAATAAAAAGTTTGCTAGTTGTAGTGCAT
right   TTTT-----AAAGTAGGTGAACATAAAAATAAAAAGTTTGCTAGTTGTAGTGCAT
        ***22222222222222222222222222222222222222222222222222222222222222222222
```

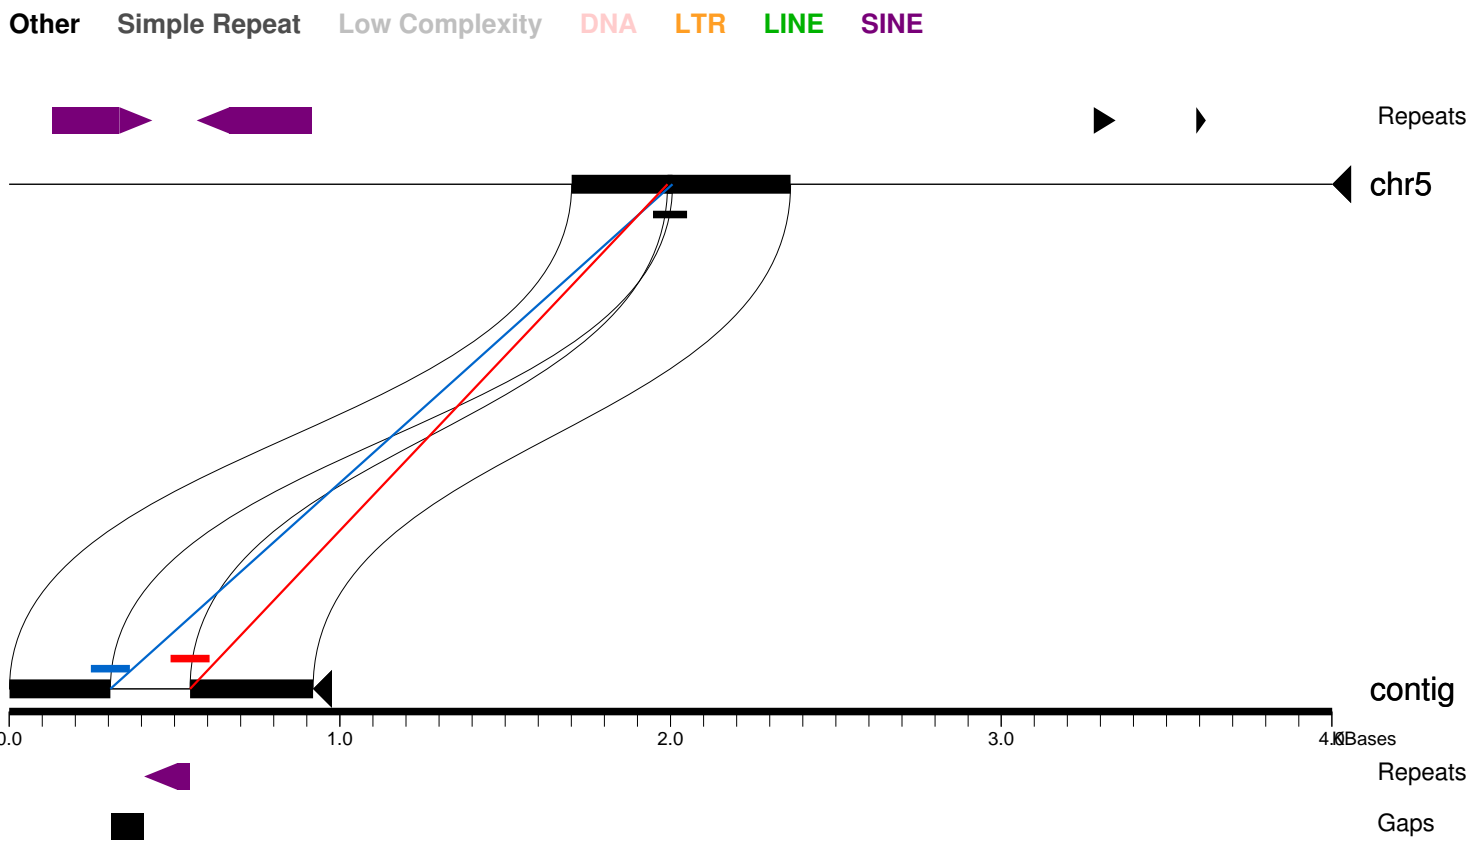

siteID: chr5\_45724110 Scaffitg3 + Breakpoint: chr5:45724097

chr5:45723937-45724270

Overlap Length: 14 INS size: 442 Genotyped: No

```

left  -----GGTTTTACTCTCAGAGGGGAAAAACATTCCTTTTTTAAAAAAGCAAAGGCGTGGCAT
chrom ATAGTCAAGTTATTGGTTTTTACTCTCAGAGGGGAAAAACATTCCTTTTTTAAAAAAGCAAAGGCGTGGCAT
right NNNNNNNNNNNA-----AAAA-----
NNNNNNNNNNN2  1111111111111111111111111111111111111111111111111111111111111

```

```

left  GAGCTGACTTATGATTTTAAAAAGAATGTTTCTTGATGCTTTATTGAGACTCTGATACATGACAGAGATGG
chrom GAGCTGACTTATGATTTTAAAAAGAATGTTTCTTGATGCTTTATTGAGACTCTGATACATGACAGAGATGG
right -----
1111111111111111111111111111111111111111111111111111111111111111111111

```

```

left  AAGCATGAATTAATTCAGTTAGAAAGCTAAAGCAGG---CCGGGCGCG-----GTGGCTCACGCC--
chrom AAGCATGAATTAATTCAGTTAGAAAGCTAAAGCAATGCTCCAGGCATGAAACAACAGAAAGTTTATACCAG
right -----AAGAAAGCTAAAGCAATGCTCCAGGCATGAAACAACAGAAAGTTTATACCAG
1111111111111111111111111111111111111111111111111111111111111111111111
1111111111111111111111111111111111111111111111111111111111111111111111

```

```

left  --TGTAATCC-CAGCACTTTGG--GAGGCCGAGGCGGGC-----GGATCACGAGGT--CAGG
chrom AATGAAATTCACAGAAGTAAAGAGGAATTATAAACTTCTAAATATTTGTTTTGAATATAGAGATAACAGG
right AATGAAATTCACAGAAGTAAAGAGGAATTATAAACTTCTAAATATTTGTTTTGA-----
22**2**2**2*2**2*222*22**22222*22*2222222222222222222*211N11111N1 1111

```

```

left  AGATCGAGACC---ATCCCGGCTAAAAACGGTGAACCCCGTCTCTACTAAA--
chrom ATTTTCAGAAGTGGGAAATGTAAGAGAAAAGAGAGGAGGCAAGGATGATCCCAAGAT
right -----
11N11N1111N1N  11NNNN11N111N11N11N11N11N11N11N11N11N11N11N

```

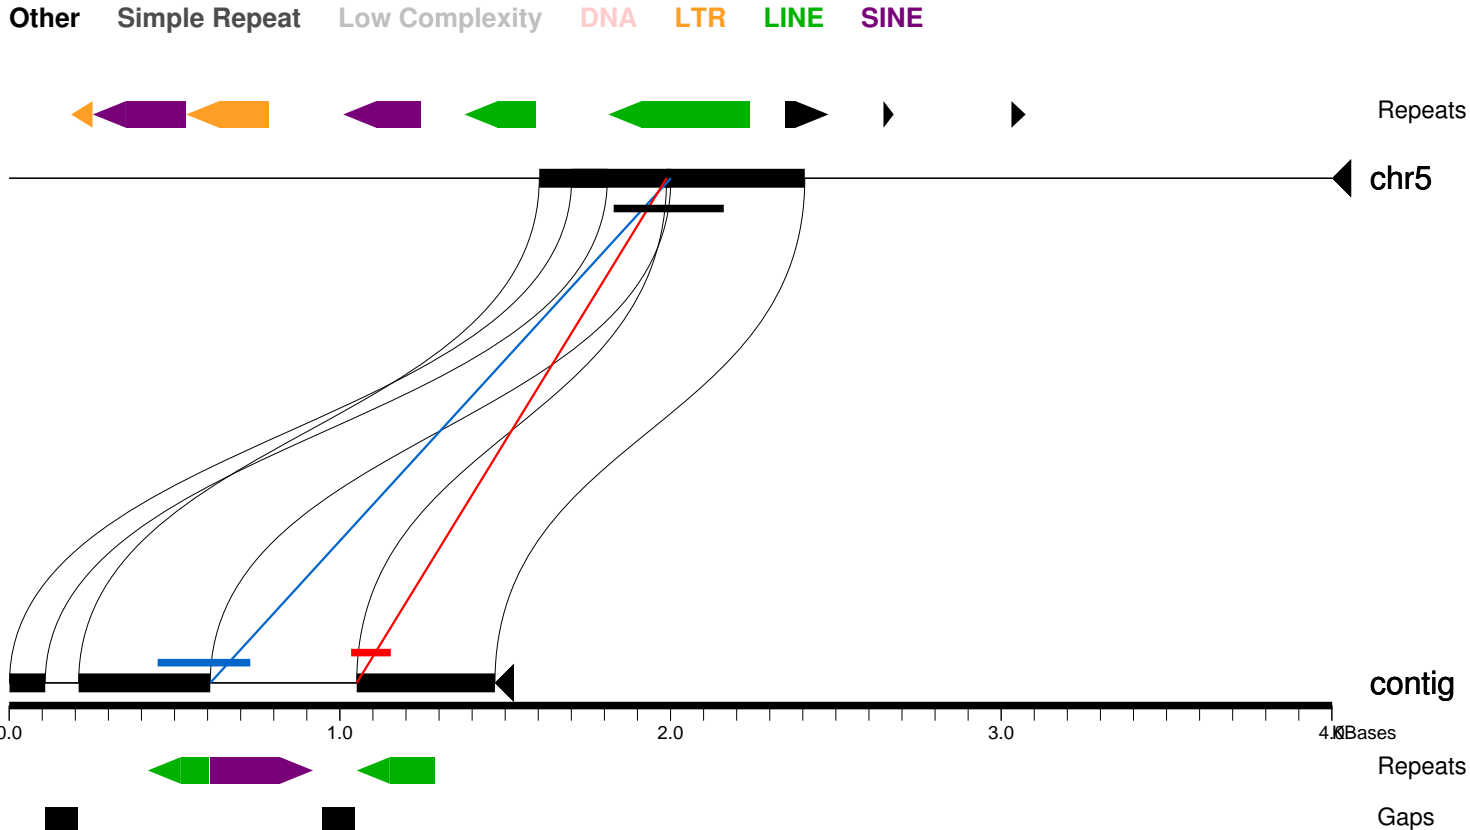



siteID: chr5\_5279747 Scafftig6 + Breakpoint: chr5:5279782

chr5:5279724-5279841

Overlap Length: 2 INS size: 472 Genotyped: No

```
left  AGACAAATGTTATGATGTTCTTGTGTTTTCTTTTCAGATGTCCATCTCTTTGTCTTTT-TANNNNNNNNN
chrom AGACAAATGTTATGATGTTCTTGTGTTTTCTTTTCAGATGTCCATCTCTTTGTCTTTT-TATCTTGGAAG
right CCGCCCGCCTCGGCCTCCCAAAGTGCTGGGATTACAGGCGTGAGCCACCGCGCCCGGCCTATCTTGGAAG
      111*11111*11111*111111***1*1111**1***11**1111*1*111*1*11111*222222222
```

```
left  NNNNNNNNNNNNNNNNNNNNNNNNNNNNNNNNNNNNNNNNNNNNNNNNNNNNNNNNNNNNNNNNNNNNN
chrom TTTTTTTGAATTTTATCTTCCAGGTTTTCTGCTTTTTGTTTTGCTTTTGT-
right TTTTTTTGAATTTTATCTTCCAGGTTTTCTGCTTTTTGTTTTGCTTTTGT-
      222222222222222222222222222222222222222222222222222222222222222222222
```

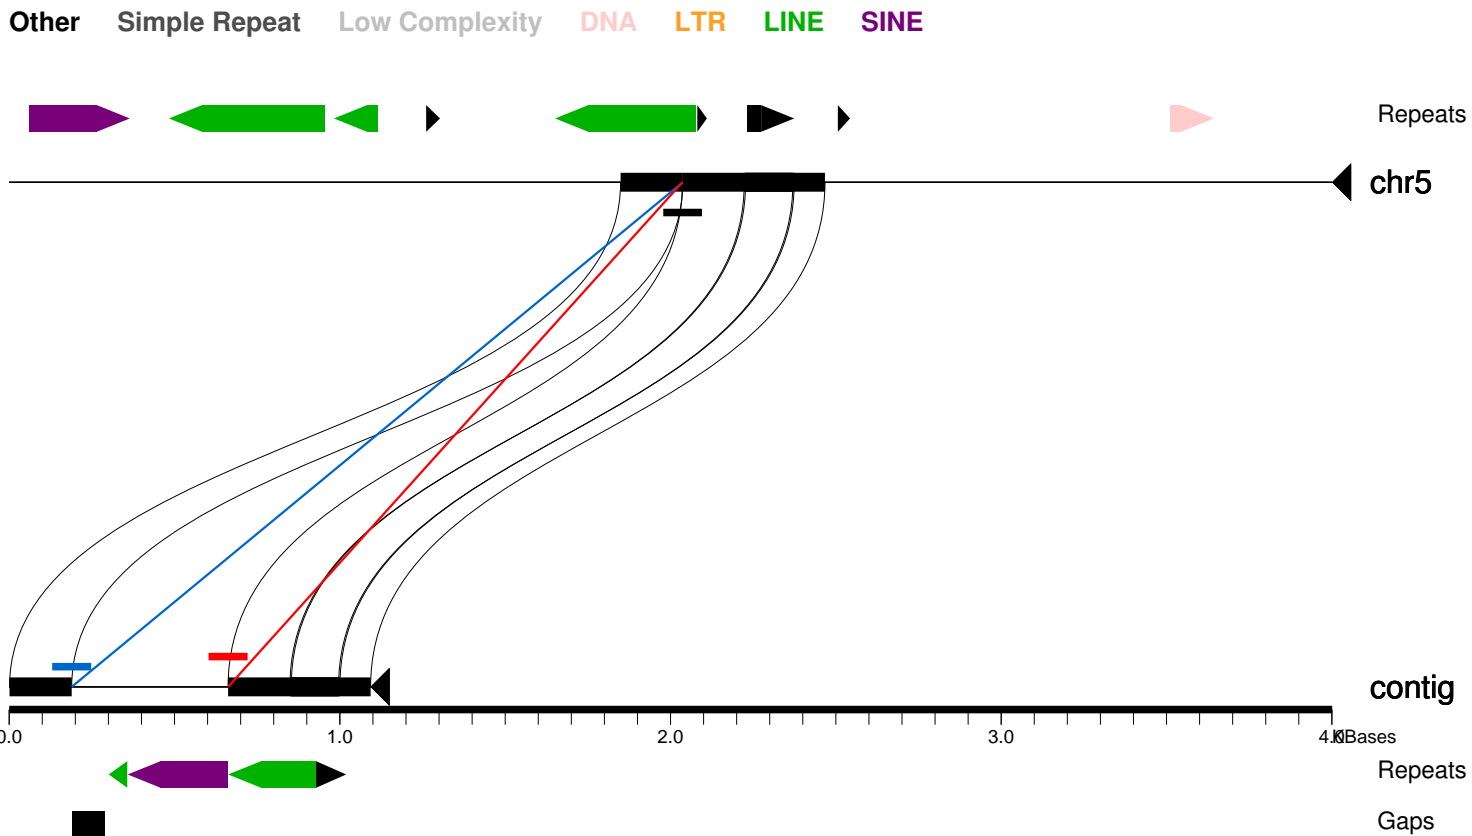

siteID: chr5\_54865782 Scaffitig14 - Breakpoint: chr5:54865784

chr5:54865741-54865843

Overlap Length: 17 INS size: 300 Genotyped: Yes

```
left  AC----CTGCT---CAGCAGGGAAAAATAAAAAAGAGGCCCTG-----AGGGATGCTAAAAAATATTA
chrom AC----CTGCT---CAGCAGGGAAAAATAAAAAAGAGGCCCTG-----AGGGATGCTAAAAAATATTA
right GCGCCACTGCATTCCAGCCTGGGCGACAGAGCGAGACTCCGTCTCAAAAAAAAAAAAAAAAAAAAAAATTA
      1*1111****1111****11**111*1*1*11***1*1*1*111111111*111*1111******1****

left  ACTTGCAGGCCGGGCACGGTGGCTCACGCCGTGTAATCCCAGCACTTTGGGAGGCCGAGGCCGGGTG
chrom ACTTGC----CATTAAAAAGTAATTATAA---AAAACGCAATTACTTTTGCA--CCAAC-----
right ACTTGC----CATTAAAAAGTAATTATAA---AAAACGCAATTACTTTTGCA--CCAAC-----
      *****2222*2222*22**222*222222222**22*2*22*****2*2*22**2*22222222
```

Other Simple Repeat Low Complexity DNA LTR LINE SINE

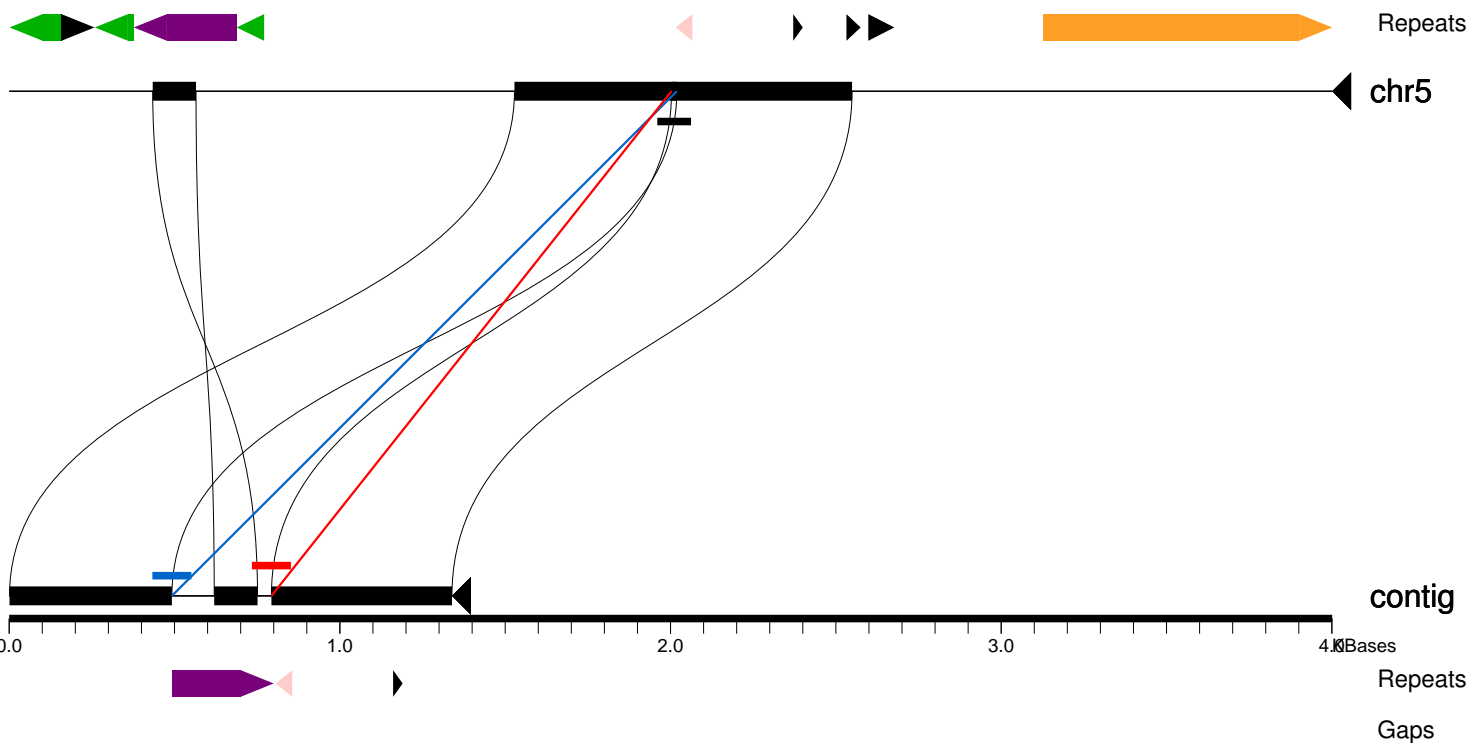

siteID: chr5\_55689488 Scaffitig4 - Breakpoint: chr5:55689489

chr5:55689440-55689528

Overlap Length: 8 INS size: 288 Genotyped: Yes

```
left  ATAAACAACCTTTAGCA-----AATTTTGGGATAC-----AAAATCAATGT
chrom ATAAACAACCTTTAGCA-----AATTTTGGGATAC-----AAAATCAATGT
right GCCACTGCAGTCCGCAGTCCGGCCTGGGCGACAGAGCGAGACTCCGTCTCAAAAAAAAAAAAAAAAAAAAA
111*1111111*11***111111111111111*1111*1**1**1111111111111111****11**111
```

```
left  ACAAAAAATCACTAGCATCCAGCACTTTGGGAGGCCGAGGCGGGTGGATCATGAGGTCAAGAGATCGAGA
chrom ACAAAAAATCACTAGCATTCCTATAC-----ACCAG-----CAACA-----ACCAAATGAGA
right AAAAAAAAAAACTAGCATTCCTATAC-----ATCAG-----CAACA-----ACCAAATGAGA
*1*****11*****2**222**222222222212**2222222222**22*2222*22*2*22*****
```

```
left  CCATCCTGG
chrom GC-----
right GC-----
2*2222222
```

Other Simple Repeat Low Complexity DNA LTR LINE SINE

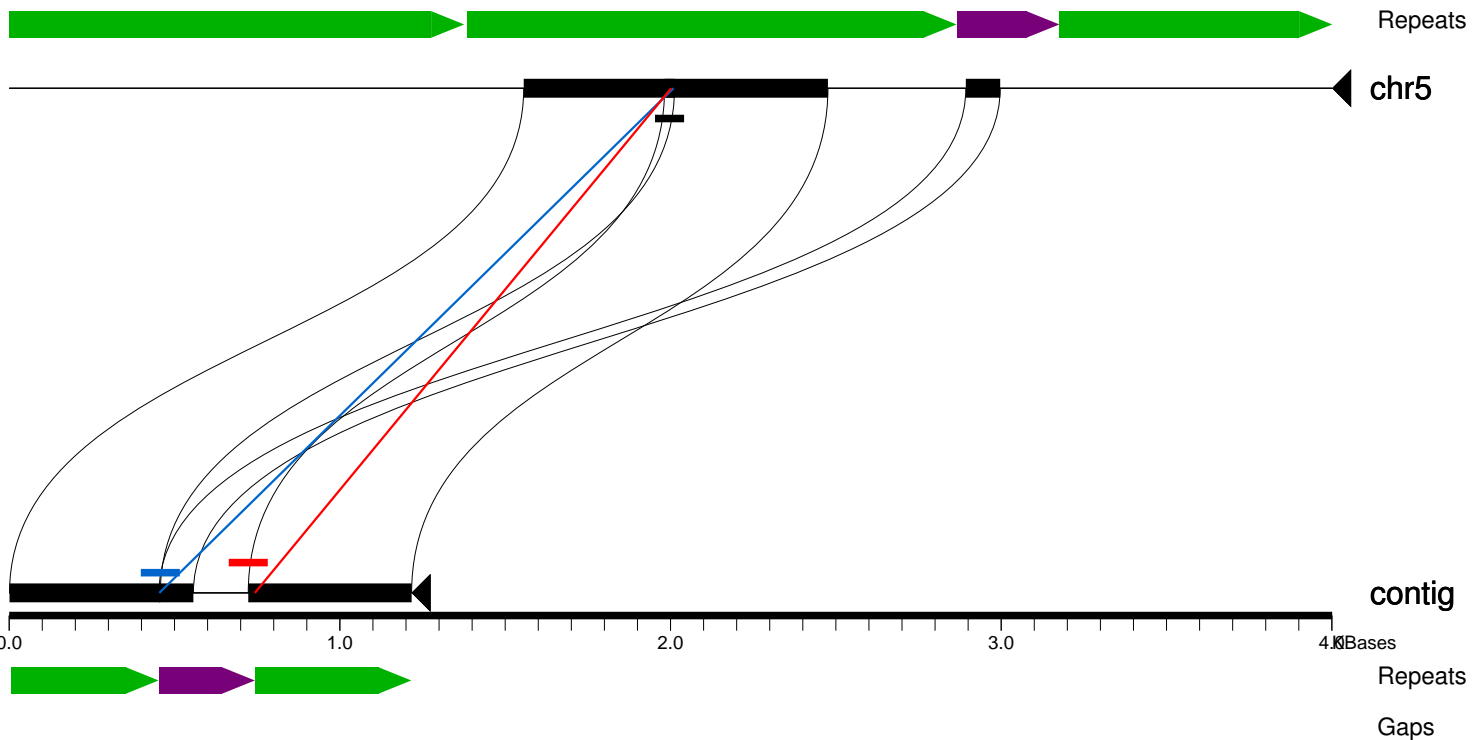

siteID: chr5\_55927965 Scafftig6 - Breakpoint: chr5:55927967

chr5:55927921-55928026

Overlap Length: 14 INS size: 297 Genotyped: Yes

```
left  -----CTTATCAAAAATATATTTGA---ATATATTTTCCAGGC----AGAAAGCCTTTTAAAAGATACA
chrom -----CTTATCAAAAATATATTTGA---ATATATTTTCCAGGC----AGAAAGCCTTTTAAAAGATACA
right  GCCACTGCACTCCAGAGTCTGGGCGACAGAGCGAGACTCC-GTCTCAAAAAAAAAAAAAAAAAAAAAGATACA
      11111111*1111**1*1*1*1111**111*111*111***1*1*1111*1***11111111*****
left  GAGAGGCCGGGCGCGGTGGCTCACGCCTGTAATCCCAGCACTTTGGGAGGCCGAGGCGGGCGG
chrom GAGACACAAAGCTT-----CTCTAAGACAAACTCTGAACCAGGGCAACA-GAGAAA
right GAGACACAAAGCTT-----CTCTAAGACAAACTCTGAACCAGGGCAACA-GAGAAA
      ***22*222**222222222222222**2***22*2*2*2**22222***2*2*222*2*222
```

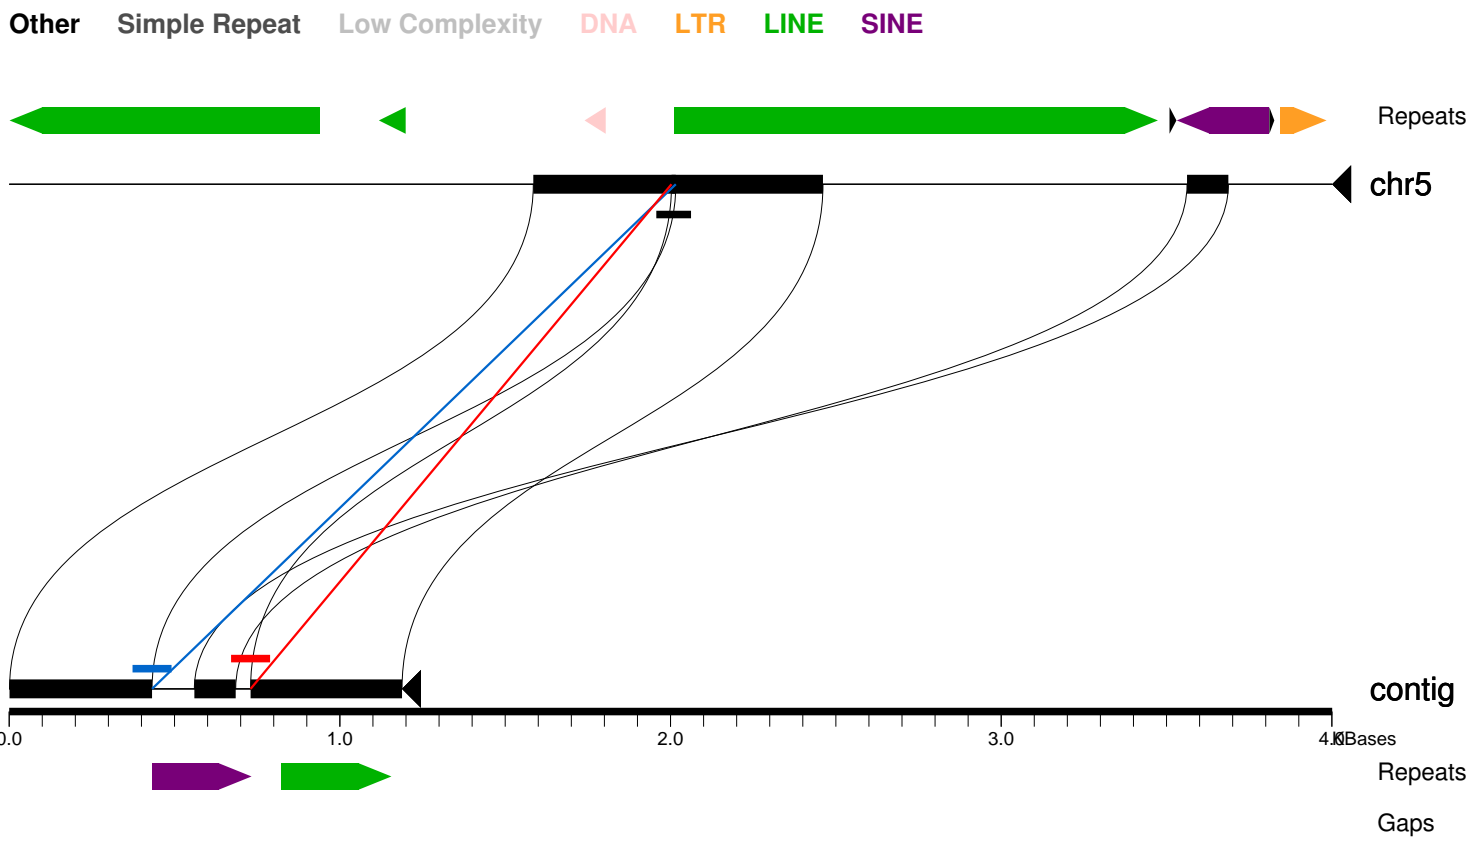



siteID: chr5\_5595239 Scaffoldig3 + Breakpoint: chr5:5595241

chr5:5595200-5595300

Overlap Length: 8 INS size: 291 Genotyped: Yes

```
left  -----GACGTGATTATTTTTAGTCCT---ATTCTTTTCTGAATATA-----GAAGACTTTTTTTT
chrom -----GACGTGATTATTTTTAGTCCT---ATTCTTTTCTGAATATA-----GAAGACTTTTTTAAT
right  CCGCCCGCCTCGGCCTCCCAAAGTGCTGGGATTACAGGCGTGAGCCACCGCGCCCGGCCGACTTTTTTAAT
      1111111*1*11*1111111111***1**111***11111*111*111*1111111111*11*****22*
```

  

```
left  TTTTTTGAGACGGAGTCTCGCTCTGTCGCCAGGCTGGAGTGCAGTGGCGCAATCTCGGCTCACTGC
chrom ATTATAGA-----AAACACATTCT-TTGCC---TCTGTAATATAAAAACTGAAAATCA-----
right ATTATAGA-----AAACACATTCT-TTGCC---TCTGTAATATAAAAACTGAAAATCA-----
      2**2*2**22222*22*2*22***2*2***2222***2*2*22*2222*22**22**2222222222
```

Other Simple Repeat Low Complexity DNA LTR LINE SINE

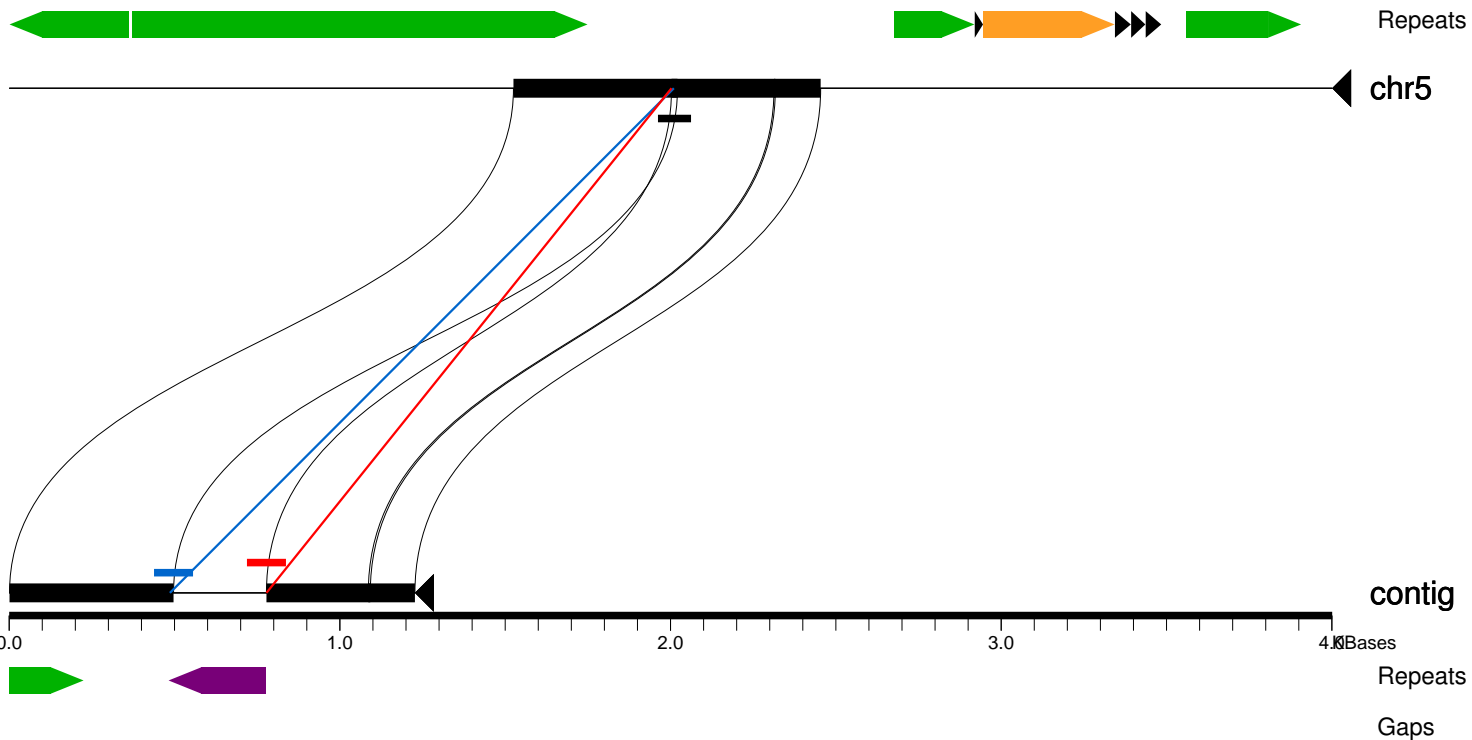



siteID: chr5\_56830721 Scaffitig1 + Breakpoint: chr5:56830722

chr5:56830675-56830781

Overlap Length: 13 INS size: 298 Genotyped: Yes

```
left  ATGCCCACCTTT--ATACCAA-----TACCAT-ACTATCTTGAAT-ACTGTAGCAT---TATAATCATTC
chrom ATGCCCACCTTT--ATACCAA-----TACCAT-ACTATCTTGAAT-ACTGTAGCAT---TATAATCATTC
right CCGCCCGCCTCGGCCTCCCAAAGTGCTGGGATTACAGGCGTGAGCCACCGCGCCCGGCC-TATAATCATTC
      11****1***11111*1****11111*111**1**111*1***111**1*111*11111*****
```

```
left  TTTTTTTTTTTTTTTTTTTTTTGGAGACGGAGTCTCGCTCTGTCGCCCAGGCTGGAGTGCAGTGG
chrom TTGAAACAAGTAGTATAT-GTCTCAAATT-TCATTCTTTATCAAA-----ATT--ATT--
right TTGAAACAAGTAGTATAT-GTCTCAAATT-TCATTCTTTATCAAA-----ATT--ATT--
      **22222222*22*2*2*2*222*22*2*2**22***2*22*22*222222*2*22*2*22
```

Other Simple Repeat Low Complexity DNA LTR LINE SINE

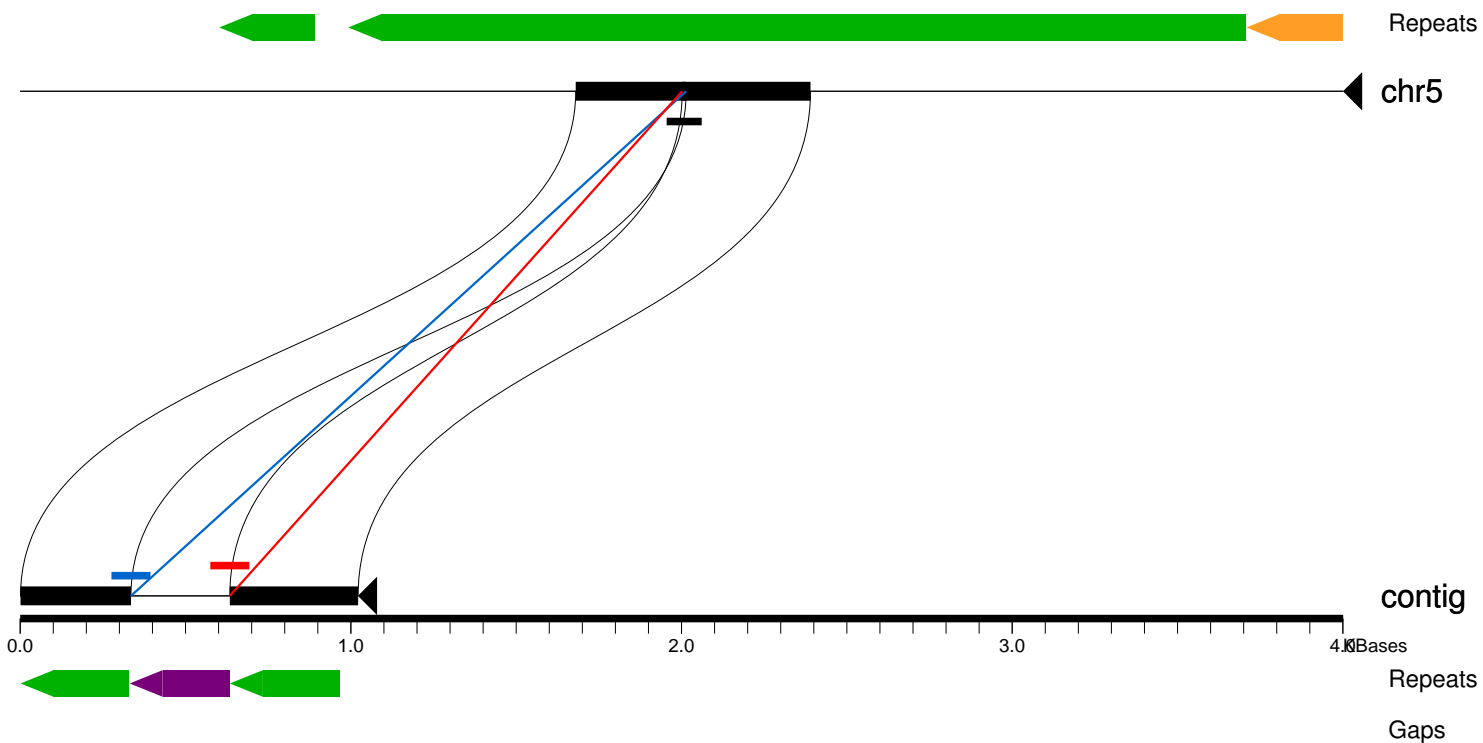

siteID: chr5\_57392462 Scaffitig1 - Breakpoint: chr5:57392443

chr5:57392397-57392502

Overlap Length: 14 INS size: 303 Genotyped: Yes

```
left  CAA----CCACAGGTTGCACAAGTTTT---ATTTC---CATTATTCACTGAAATTT---GGCTCTAAGTT
chrom CAA----CCACAGGTTGCACAAGTTTT---ATTTC---CATTATTCACTGAAATTT---GGCTCTAAGTT
right CCGCCCGCCTCGGCCTCCCAAAGTGCTGGGATTACAGGCGTGAGCCACCGCGCCCGGCCGGCTCTAAGTT
      *1111111*1*1*11*1*11****11*111***1*111*1*1*11***1*1111111111*****

left  TTTTTTTTTTTTTTTTTTTTTTTTTTTTTTGGAGACGGAGTCTCGCTCTGTCGCCCAGGCTGGAGTGC
chrom TTTATCATGACCCCTTAAAT-----GACTTGCCATGAATACTTAACCATAGTT-
right TTTATCATGACCCCTTAAAT-----GACTTGCCATGAATACTTAACCATAGTT-
      **2*22*2222222**222*222222222222*2**2**22**2222*2222*222**22
```

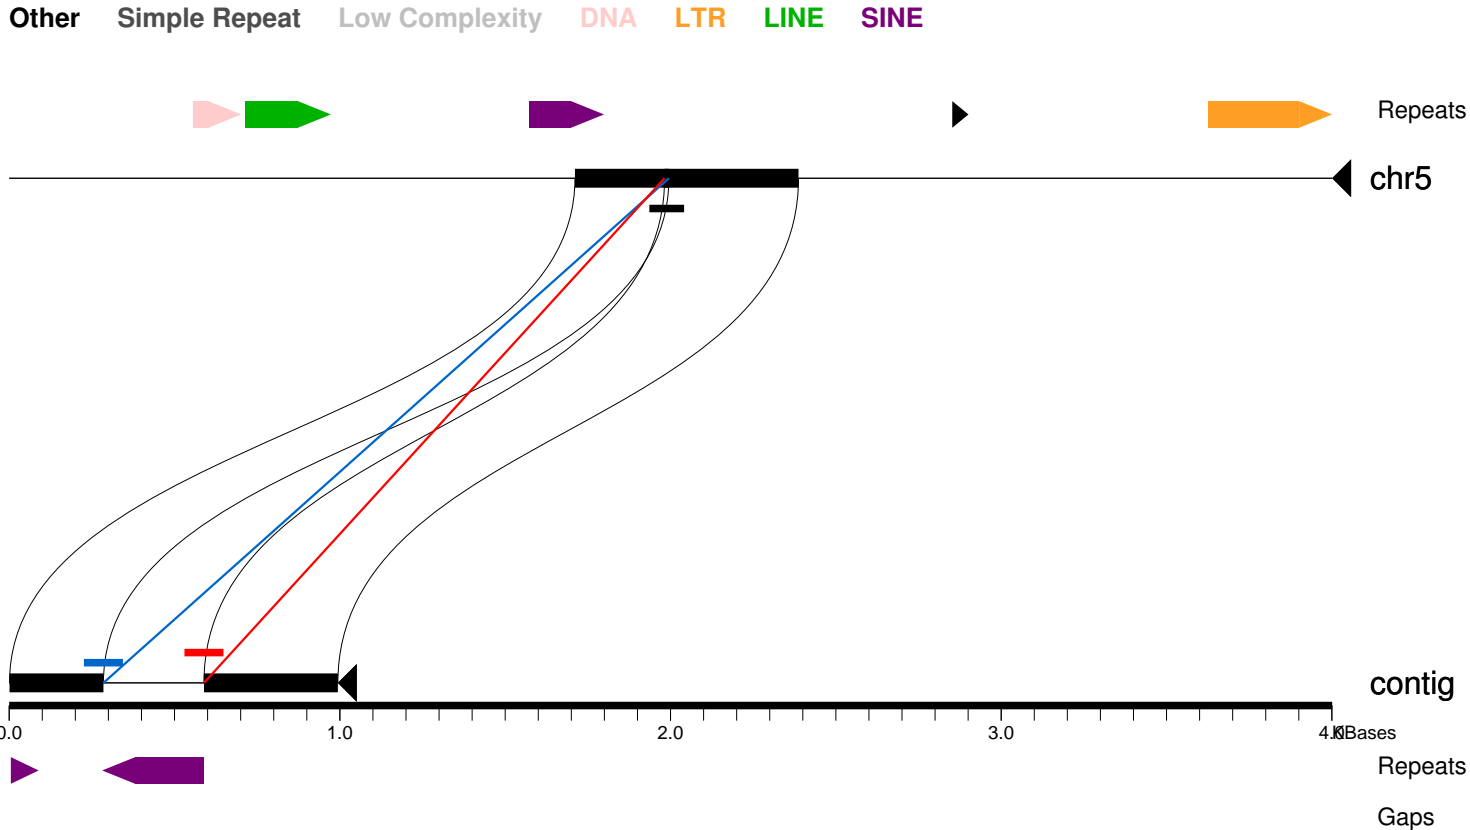



siteID: chr5\_58609362 Scaffitig1 + Breakpoint: chr5:58609360

chr5:58609317-58609418

Overlap Length: 17 INS size: 173 Genotyped: Yes

```
left  GAGAT-----GCCCCACACTTATTTGG----ACAAGACCCAGCAAAGAAATC-TAACCAAGCT
chrom GAGAT-----GCCCCACACTTATTTGG----ACAAGACCCAGCAAAGAAATC-TAACCAAGCT
right GCCATTCTCCTGCCTCAGCCTCCCAAGTAGCTGGGACTACAGGCGCCCGCCACCACGCCCTAACCAAGCT
      *11*11111111111111111111***1*1**11**11***1111***1*11**1**1*11*111*1*****
left  ATATCTTTTTTTTTTTTTTTTTTTTTTTTTTTTTTTTTTTTGGAGACGGAGTCTCGCTCTGTCGCCAGGC
chrom ATATCTTGAGTGGGGACAACCTTCTGCTGTATGT----AGATGG---CTTACTCAT-----C
right ATATCTTGAGTGGGGACAACCTTCTGCTGTATGT----AGATGG---CTTACTCAT-----C
      *****222*2222222222**2*22*2*2*2*22222***2**222**22***2222222222*
```

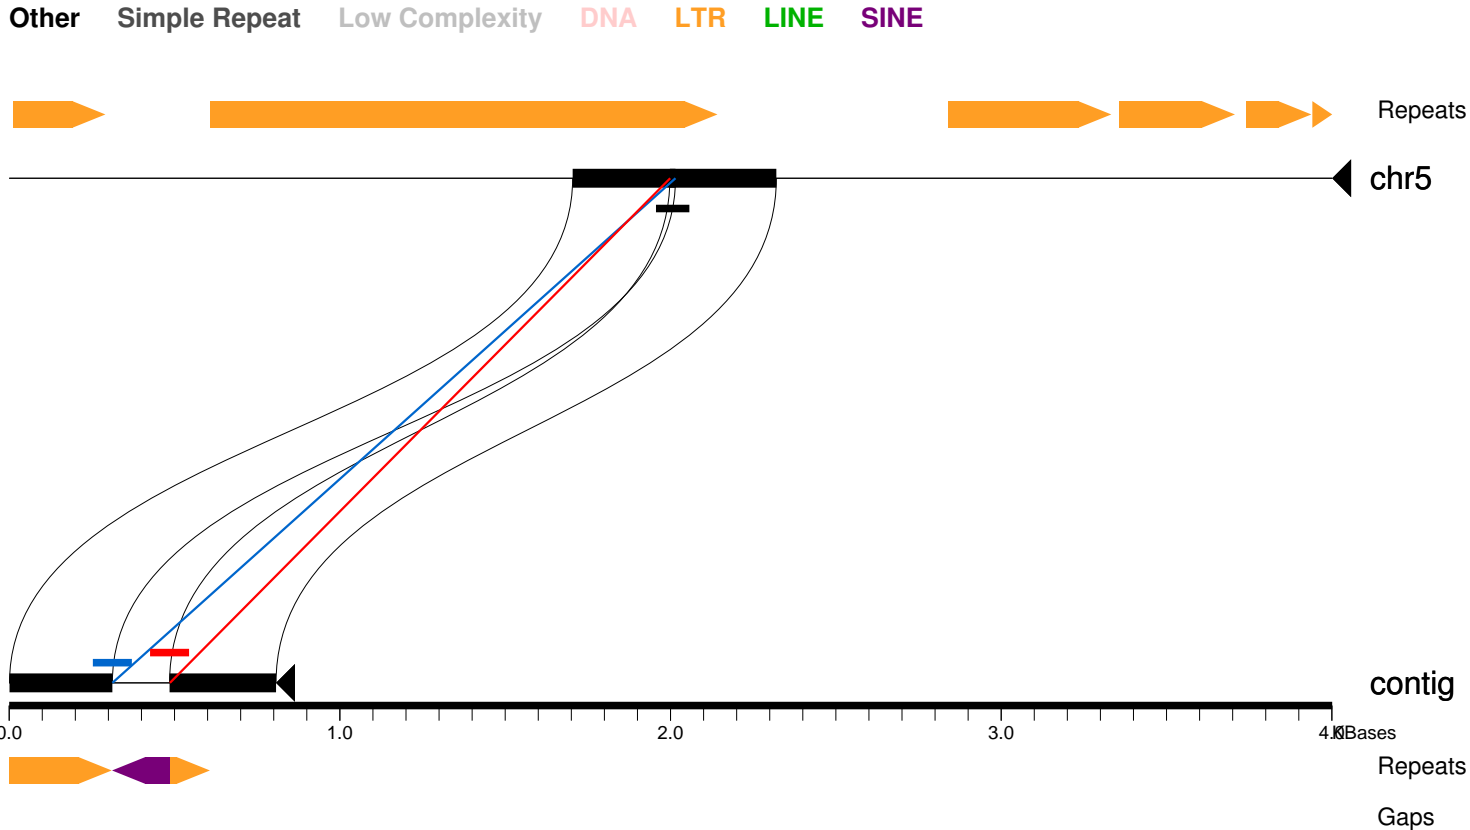

siteID: chr5\_59580677 Scaffitg2 - Breakpoint: chr5:59580681

chr5:59580521-59580856

Overlap Length: 16 INS size: 283 Genotyped: Yes

```
left -----AATAGAGAACAGCTAGAGGCTTGTGATTTATTCTCATGTTAGAAGCCCTCTCAT
chrom TTCATCCCCACTTTAAAAATAGAGAACAGCTAGAGGCTTGTGATTTATTCTCATGTTAGAAGCCCTCTCAT
right GCG-----TGAACCCGGGAAGCG---GAG-CTTG-----CA-GTGAGCCGAGATTGC--
NNN 2N2*111*1***11*111***1****111111111111**1**1**11*111*11*11
```

```
left ATGACATATTCAGGATAGGTAGTT-GGCCAGTTTGTAAATGAATATATTTAAAGTCAAGAATCTTCAGAA
chrom ATGACATATTCAGGATAGGTAGTT-GGCCAGTTTGTAAATGAATATATTTAAAGTCAAGAATCTTCAGAA
right --GCCAC-TGCAG--TCCGCAGTCCGGCCTGGGCGACAGAGCGAGAC-TCCGTCTCAAAAA-----AAAA
11*1**11*1***11*11*1***11***1*111*11*1*111*1*11*111111****1**11111*1**
```

```
left ATAATACCTCAAGTATTCCTTTATAAATGGCAACACTT----GCAC-----TTTG--GGAG
chrom ATAATACCTCAAGTATTCCTTTATAAATGGCAACACTTAAATGCACATAGTTGGCTACTCTTTTGATGTAG
right AAAATAAAATAAAATAAATAA--ATAAATGGCAACACTTAAATGCACATAGTTGGCTACTCTTTTGATGTAG
*1****11*1**11*1*1111*****2222****2222222222222222****22*2**
```

```
left -GCCGAGCGGGTG----GATCATGAGGTCAGGAGATCGAGACCATCC-TGGCTACAAGGTGAA-ACCC
chrom AGCCAAGGCCTTTGCTTTGAGTTTGAATCTCTTAGTTAGATTTCTACAATGTCTTACATCAAGAACATCC
right AGCCAAGGCCTTTGCTTTGAGTTTGAATCTCTTAGTTAGATTTCTACAATGTCTTACATCAAGAACATCC
2***2****222**2222**222***2222222**2*2**222*22*22**2**2***2222***2*2**
```

```
left -----CGTC-TCTA---CTAAAAATACAAAAAATTAGCCGGGC-GTGGTGGCGGGC
chrom ATTATGCATCATCTATGGCTTACAGTGTTCCTTTGTAATTTGAGAAGTTAAGGCACTT
right ATTATGCATCATCTATGGCTTACAGTGTTCCTTTGTAATTTGAGAAGTTAAGGCACTT-----
222222*2**2****222**2*2*2*222222222**222*21N 11NNN111NNNN
```

Other Simple Repeat Low Complexity DNA LTR LINE SINE

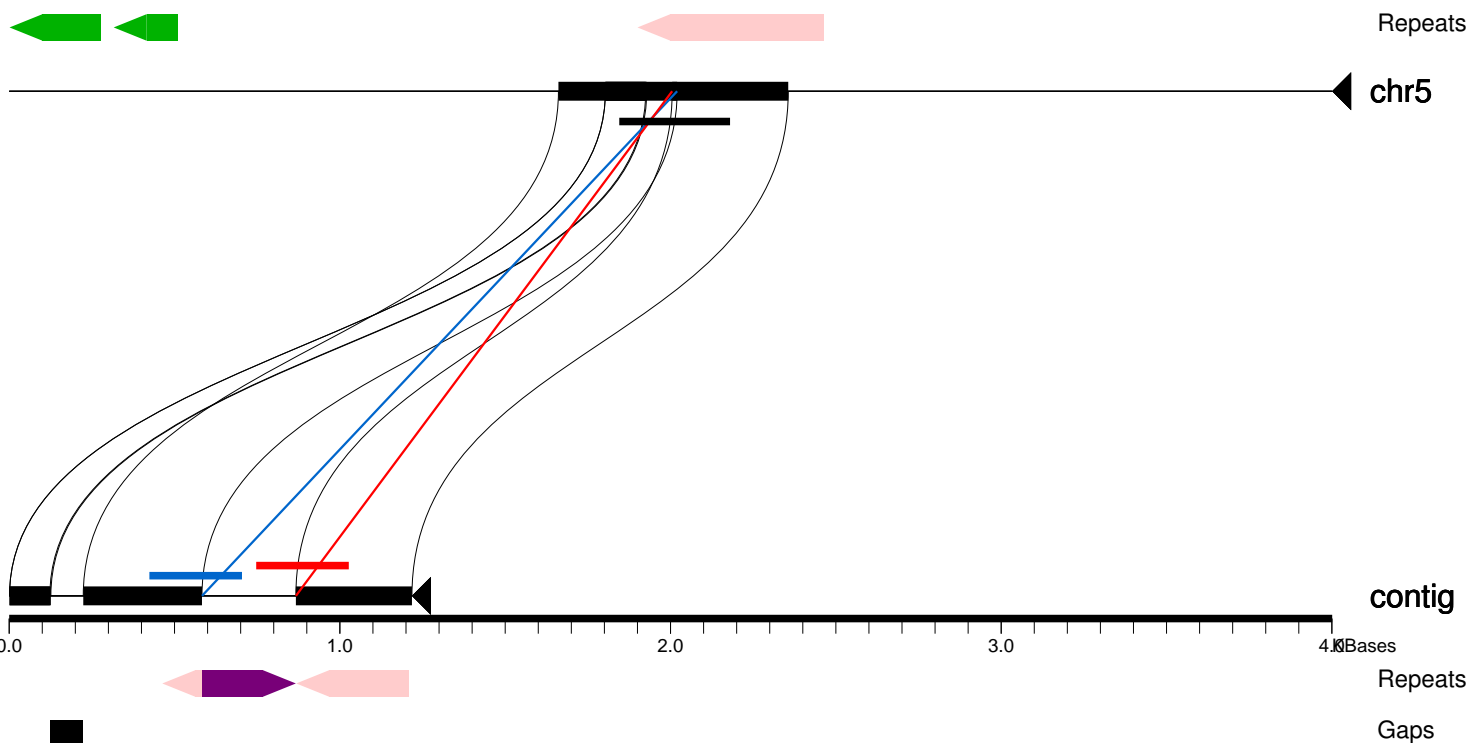





siteID: chr5\_6218106 Scaffitg7 + Breakpoint: chr5:6218088

chr5:6217928-6218258

Overlap Length: 11 INS size: 301 Genotyped: Yes

left -----GTGGGGCTGGCCAGGTGCCATGTGATGCACACACTGAAGCAGAACAGAGGACACAATGACTCTG  
chrom ATAGCAGTGGGGCTGGCCAGGTGCCATGTGATGCACACACTGAAGCAGAACAGAGGACACAATGACTCTG  
right TTT--AGTAGAGACGG---GGT-----TTCACCTTGTTAGCCAGGAT---GGTCTCGATCTC-CTG  
N2N 2\*\*1\*1\*11\*\*111\*\*\*111111111\*1\*\*\*1111\*1\*11\*\*\*1\*1111\*\*1\*1\*1\*\*11\*1\*\*\*

left AAACAGGGAGAGATGTTCCCATACTAGGCGATGGGTCCAGGAGAGGTTGTGAGGATGCTGCCTTTTGGTA  
chrom AAACAGGGAGAGATGTTCCCATACTAGGCGATGGGTCCAGGAGAGGTTGTGAGGATGCTGCCTTTTGGTA  
right ACCTC-----ATGATCC---ACCCGCCTCGGCCTCCCAAAGTGCTGG---GATTACAGGC-----GTG  
\*111111111111\*\*\*1\*\*\*111\*\*11\*1\*111\*11\*\*\*111\*\*1\*1\*1\*111\*11\*1\*1\*1\*11111\*\*1

left AGGACGTGTCTCAGGCCCATAGCCCATTTCTTTTTTTTTTTTTTTGAGACGGA-----GTCTCGCTCTGT  
chrom AGGACGTGTCTCAGGCCCATAGCCCATTTCTTTATGTGTCTGAGCAGGGCTGGAAAAGCCTGTGTCCCTGAGG  
right AGCCACCGCGCCCGGCC---AGCCCATTTCTTATGTGTCTGAGCAGGGGTGGAAAAGCCTGTGTCCCTGAGG  
\*\*11111\*111\*1\*\*\*111\*\*\*\*\*\*2\*2\*2\*2\*22222\*2\*N2\*\*\*222222\*\*2\*2\*\*22\*2

left CGCCCAGGCC-----GACTGCGGACTG-----CAGTGG---CGCAATCTCGGCTC-----ACTGCA-----  
chrom CTGCCCTTCCCTAATAGGGCTGTTCACTTTGACCCAGTGCAACCCACCCTGCCCTCTAGAACTGCACACA  
right CTGCCCTTCCCTAATAGGGCTGTTCACTTTGACCCAGTGCAACCCACCCTGCCCTCTAGAACTGCACACA  
\*22\*\*222\*\*22222\*\*2\*\*\*222\*\*\*222222\*\*\*\*\*2222\*2\*\*22\*\*222\*\*\*2222\*\*\*\*\*2222

left -----AG--CTCCGCTTCTGGGTTTACGCCATTCTCCTGC-  
chrom TGGTGGCCCTATATAGGACTCTTATAGCAGAGGACGTGCCATTGGTCTGGT  
right TGGTGGCCCTATATAGGACTCTTATAGCAGAGGACGTGCC-----  
222222222222\*\*22\*\*222\*22\*2\*2\*22\*22\*\*111NNN111N

Other Simple Repeat Low Complexity DNA LTR LINE SINE

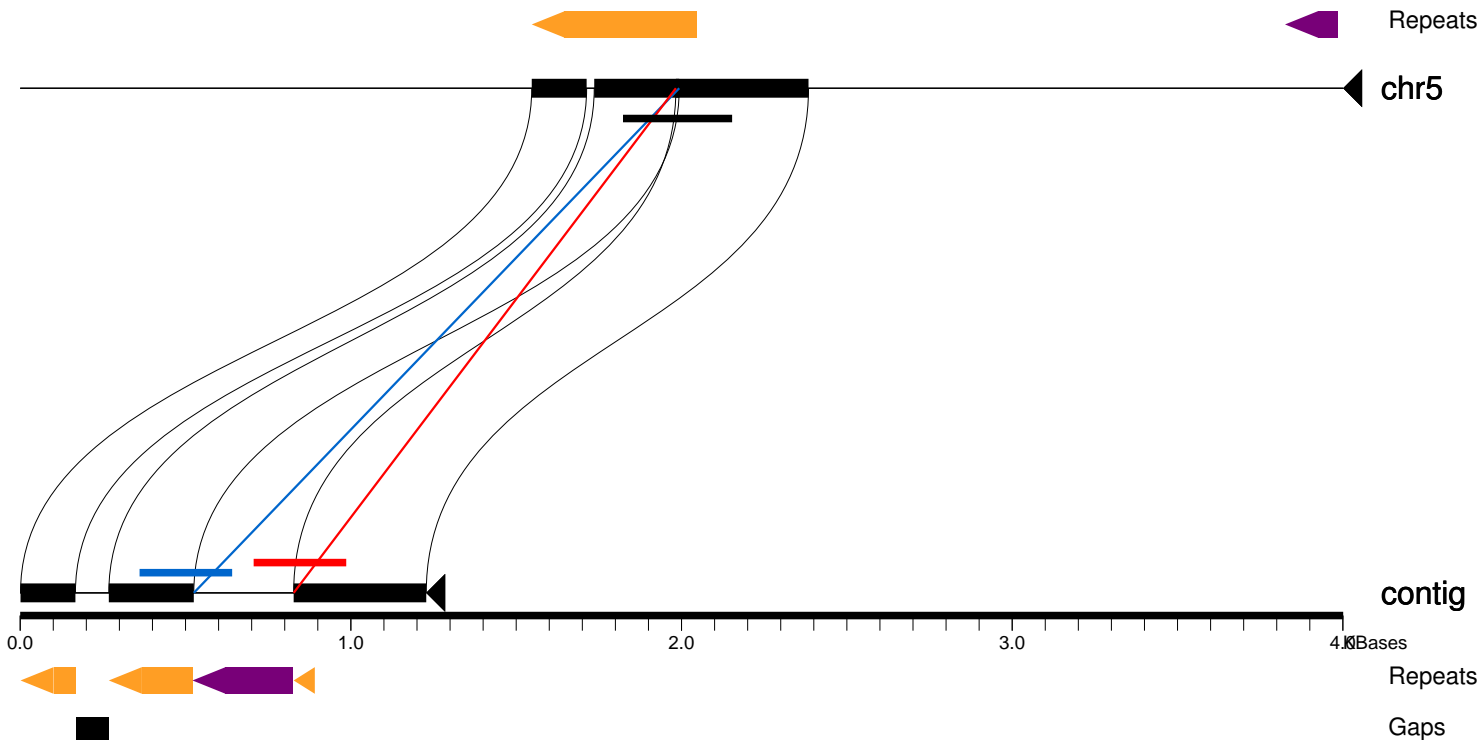

**siteID: chr5\_6284525 Scaffoldig2 + Breakpoint: chr5:6284520  
 chr5:6284476-6284579  
 Overlap Length: 16 INS size: 489 Genotyped: No**

```

left   TAACTAT-----AACTTAATATTTAAAACAGA----AGACAAGGTTGAAATTATGTATTCAAAC
chrom  TAACTAT-----AACTTAATATTTAAAACAGA----AGACAAGGTTGAAATTATGTATTCAAAC
right  CCACCCGCCTCGGCCTCCCAAAGTGCTGGGATTACAGGCGTGAGCCACCGC-GCCCGGCCGTATTCAAAC
      11**1111111111111111**11*11*111*11****11111**1**11*11*1111111*****
left   GTTTT-----TTTTNNNNNNNNNNNNNNNNNNNNNNNNNNNNNNNNNNNNNNNNNNNNNNNNNNNNNN
chrom  GTTTT-----AAGGAAACAAACAGAAAACCACTTAACCTTTCTGAAGTTTGGTT
right  GTTTT-----AAGGAAACAAACAGAAAACCACTTAACCTTTCTGAAGTTTGGTT
      *****222222222222222222222222222222222222222222222222222222222222222222
  
```

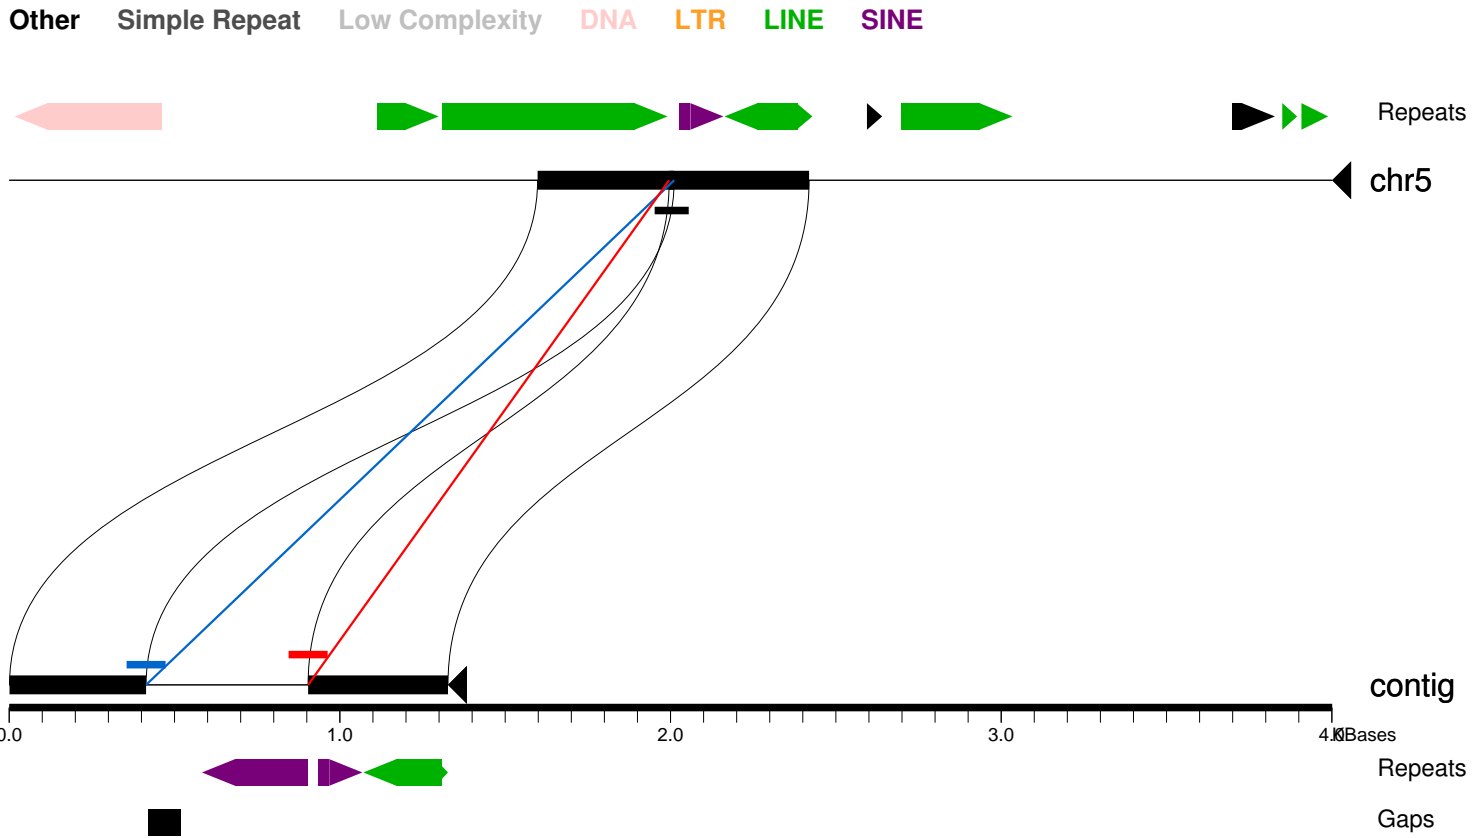

siteID: chr5\_63658732 Scaffitg2 + Breakpoint: chr5:63658736

chr5:63658692-63658795

Overlap Length: 16 INS size: 292 Genotyped: Yes

```
left  -----CTTGGCCATATGTATGTCTTCT--TTTCAAGAATGT-----CTGTTTCATGTCCCTTTGCCCC
chrom -----CTTGGCCATATGTATGTCTTCT--TTTCAAGAATGT-----CTGTTTCATGTCTTTGCCCCA
right  TCCGCCCGCCTCGGCC-TCCCAAAGTGCTGGGATTACAGGCGTGAGCCACCGCGCCCGGCCTTTGCCCCA
      1111111111**1***1*1111*1**11*1111**1**1*11**1111111*1111*11*1*****2

left  CTTTTTTTTTTTTTTTTTTTGGAGACGGAGTCTCGCTCTGTCGCCAGGCTGGAGTGCAGTGGCGCAA
chrom CTTTTT-----AAAGGGGTATTCT-TTTCTTGTAATAATTAAGTGCCTTATAGAGG
right CTTTTT-----AAAGGGGTATTCT-TTTCTTGTAATAATTAAGTGCCTTATAGAGG
      *****2222222222222222*2**2**2222*2*2**2222*222*22*****22*222*222
```

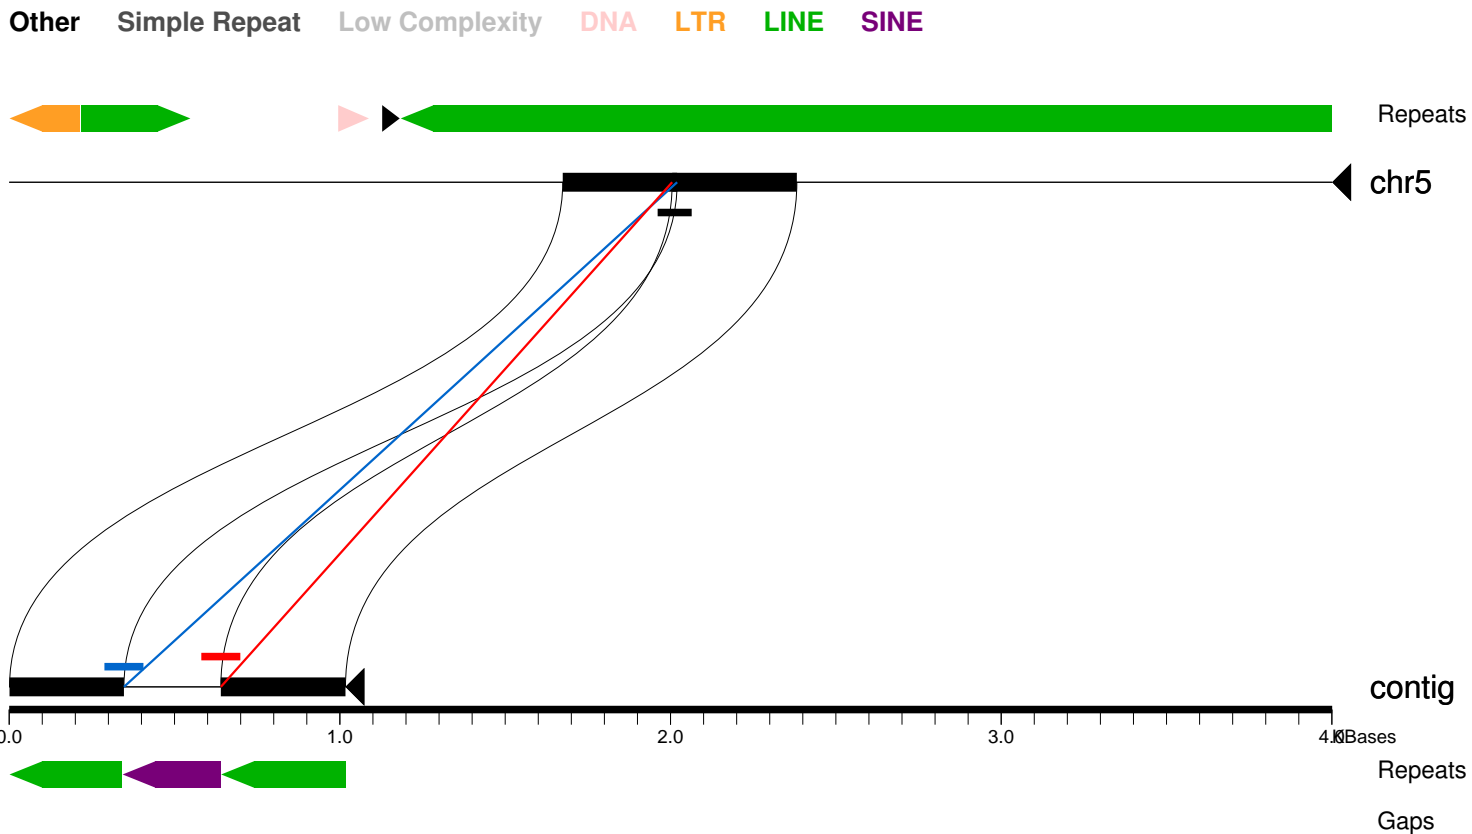

siteID: chr5\_64518805 Scaffitg2 + Breakpoint: chr5:64518814

chr5:64518655-64518982

Overlap Length: 9 INS size: 403 Genotyped: No

|       |                                                                                                                                                                                      |
|-------|--------------------------------------------------------------------------------------------------------------------------------------------------------------------------------------|
| left  | A-----AAGCACAAACCATTAAAAAATTAATAAATTGAATTTTCATCAAAAATTTAAAAGGCACTTCAAAAA                                                                                                             |
| chrom | ACATGAAAGCACAAACCATTAAAAAATTAATAAATTGAATTTTCATCAAAAATTTAAAAGGCACTTCAAAAA                                                                                                             |
| right | NNNNNNNNNNNN-----AAAAA-----1NNNNN11111111111111111111111111111111111111111111111111                                                                                                  |
| left  | TGAAGACGCAAGCAGAAACTAGGAGAAAAATATCCATAAAAATATATCTGACAAAAGACTTATATCCAGAATA                                                                                                            |
| chrom | TGAAGACGCAAGCAGAAACTAGGAGAAAAATATCCATAAAAATATATCTGACAAAAGACTTATATCCAGAATA                                                                                                            |
| right | 11111111111111111111111111111111111111111111111111111111111111111111111111                                                                                                           |
| left  | TATAAAGAACTCATAACTCAAAAAAAGGCCGAGGCGGGCGGATCACGAGGTCAGGAGATCG---AGAC-C                                                                                                               |
| chrom | TATAAAGAACTCATAACTCAAAAAAAGGCCGAGGCGGGCGGATCACGAGGTCAGGAGATCG---AGAC-C                                                                                                               |
| right | -----AAAAAAGGAAAAAATTTTA--AATGGGTAAAAATTTTGTGTAGACAC<br>11111111111111111111111111111111111111111111111111111111111111111111111111<br>*****222*222222222*22*222***2*22222*2*222***2* |
| left  | ATCCGGCTAAAA---CGGT---GA-AACCCGTCTCTACTAAAAATACAAAAATTAGCCGGC-GTAG                                                                                                                   |
| chrom | TTCACCTACAAAAAATCCATATGGATAAAAAATAAAAAAGACTGACAATACCAAGTATTGACAAGGATGTAG                                                                                                             |
| right | TTCACCTACAAAAAATCCATATGGATAAAAAATAAAAAAGACTGACAATA-----2**2*22*2***222*22*222**2**222222222***2*2***1N11NN111NN1NN11N 1111                                                           |
| left  | TG--GCGGGCGC-----CTG-TAG-----TC                                                                                                                                                      |
| chrom | AGCAGCTGGAACCTTCTATATTACTGATAGAAATATAAAAATAATACATC                                                                                                                                   |
| right | -----N1 11N11NN1 111 111 11                                                                                                                                                          |

Other Simple Repeat Low Complexity DNA LTR LINE SINE

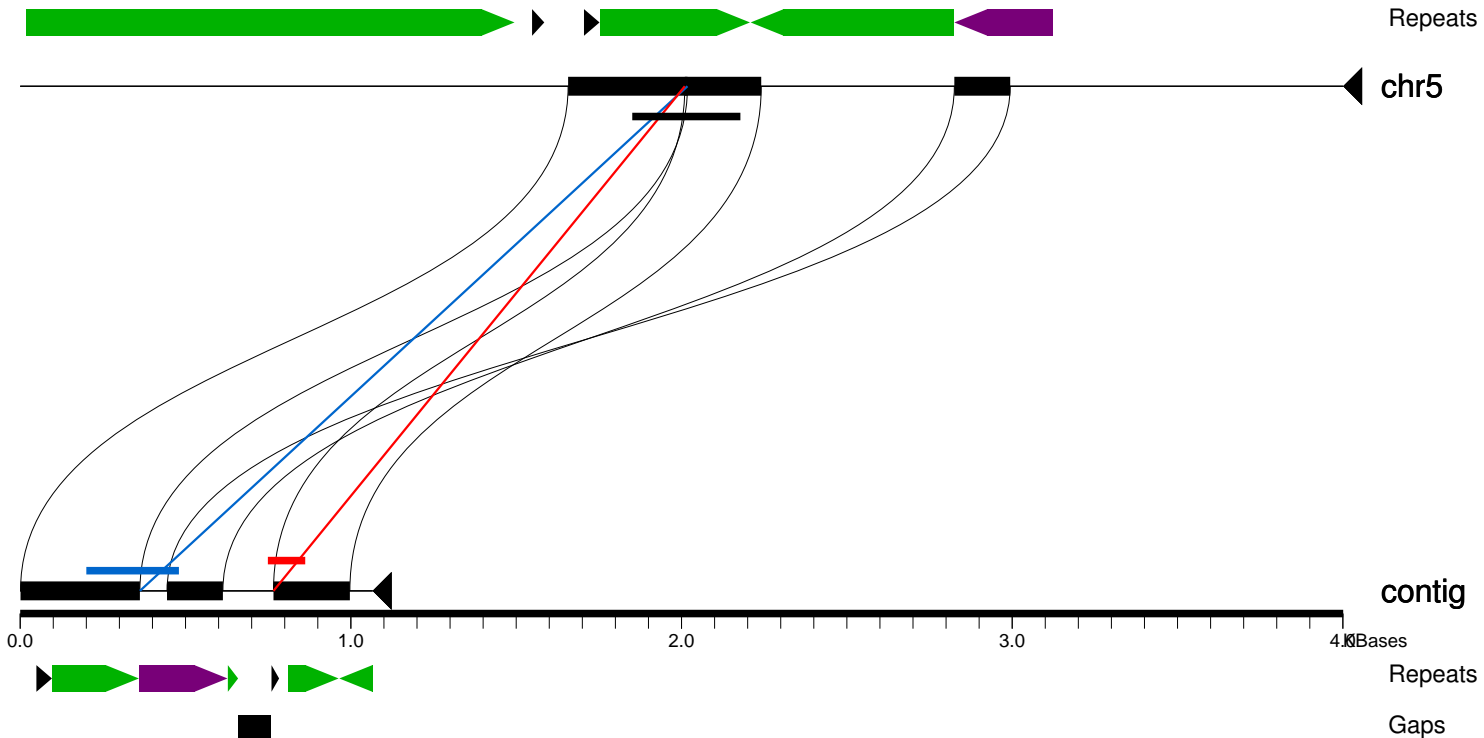

siteID: chr5\_65569646 Scaffitg1 - Breakpoint: chr5:65569580  
 chr5:65569432-65569789  
 Overlap Length: 58 INS size: 395 Genotyped: No

```

left  T-----
chrom TGCTAATCATGTGTAAAAATTACTCCTGACCCACAATTTTCAATTATAGCACCTGAACCAGCCTGAAAAATTG
right NNNNNNNNNNNNNNNNNNNNNNNNNNNNNNNNNNNNNNNNNNNNNNNNNNNNNNNNNNNNNNNNNNNNNNNNNNNNNNN
1NNNNNNNNNNNNNNNNNNNNNNNNNNNNNNNNNNNNNNNNNNNNNNNNNNNNNNNNNNNNNNNNNNNNNNNNNNNN

left  -----AAAAAGAAGAATAAACCTTGAACATTAACAGCTACACAG
chrom GAGAAATTAAATGGCATAAAAATAGAAGCAATAAAAAAGAAGAATAAACCTTGAACATTAACAGCTACACAG
right -----
11111111111111111111111111111111111111111111111111111111111111111111111111111111111

left  TGTTC TGATGCTAAAGCACAAAGCATGTCAAACACACTTCAGTGGATTTTAAAGAAATCCACCAGAGGCC
chrom TGTTC TGGATGCTAAAGCACAAAGCATGTCAAACACACTTCAGTGGATTTTAAAGAAATCCACCAGATGCC
right -----ATGCTAAAGCACAAAGCATCTCAAACACACTTCAGTGGATTTTAAAGAAATCCACCAGATGCC
111111111 *****1*****2*****

left  GGGCGCGGT-----GGCTCAC-----GCCTGTAATCCAGCAC-----
chrom ACTTGTCCTTCAGCATCCTAGGGCTCTCTTCCCTAGCCTCTTCTCTGTACCCACAAAAAAGGTGCCCGA
right ACTTGTCCTTCAGCATCCTAGGGCTCTCTTCCCTAGCCTCTTCTCTCTG-----
2222*222*22222222222*****2*22222*****2*22**2*2*N11

left  TTTGGG--AGGCCGAGG-----CGGG-----
chrom TTTGGATAATGACAGGGTGCTTTTTTATCTTCCATAAACTACTACTTGCTTTTTTCGCCTTCGGGGAGTGAC
right -----
11111N  1N1N1NN11 1111

left  -CGGATCA
chrom ACGTGGCT
right -----
11NNN1N
  
```

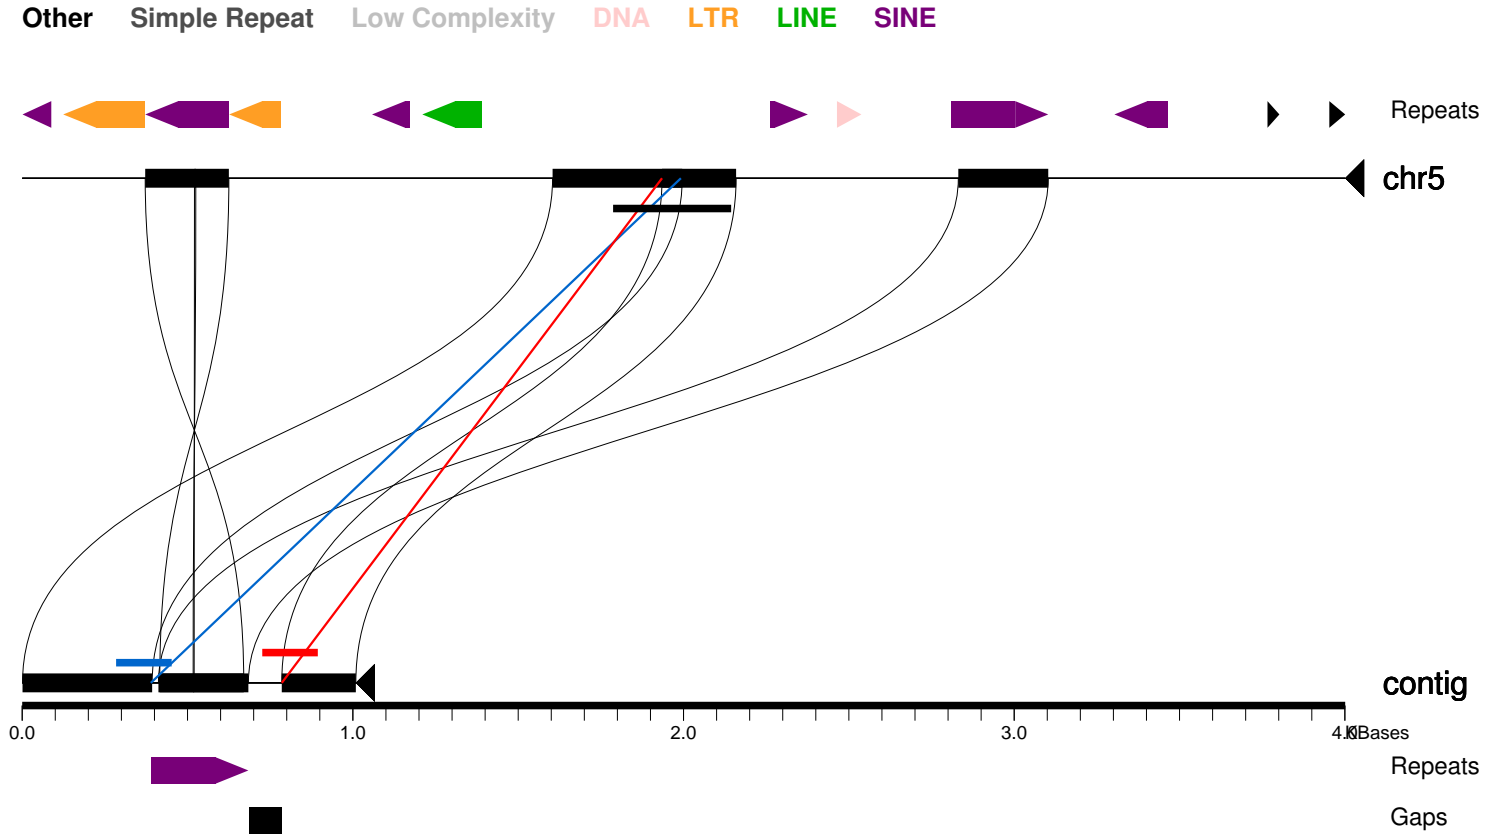

**siteID: chr5\_68191002 Scafftig3 - Breakpoint: chr5:68191050**  
**chr5:68190998-68191109**  
**Overlap Length: 8 INS size: 456 Genotyped: No**

```
left  TTGACCTTTACATTTGTTTCATGCAGAGTCACATCACACCCCTGTGAAATATG-----TAAGGCAGGCC
chrom TTGACCTTTACATTTGTTTCATGCAGAGTCACATCACACCCCTGTGAAATATG-----TAAGGCAGAT-
right NNNNNNNNNNNNNNNNNNNNNNNNNNNNNNNNNNNNNNNNNNNNNNNNNNNNNNNNNNNNNNNNNNNNNNNN
1111111111111111111111111111111111111111111111111111111111111111111111111
*****222
```

```
left  GGGCGCGGTGGCTCACGCCTGTAATCCCAGCACTTTGGGAGGCCGAGGCGGGCGGA-----
chrom -----TTACT-AAGCCATTTTAC----AGGTGGGGAAACTGACACCCAGAGATTTACTC
right -----TTACT-AAGCCATTTTAC----AGGTGGGGAAACTGACACCCAGAGATTTACTC
22222222*22**2*2***22*22*2*2222*22*2***22*2**22*22222*222222*222222
```

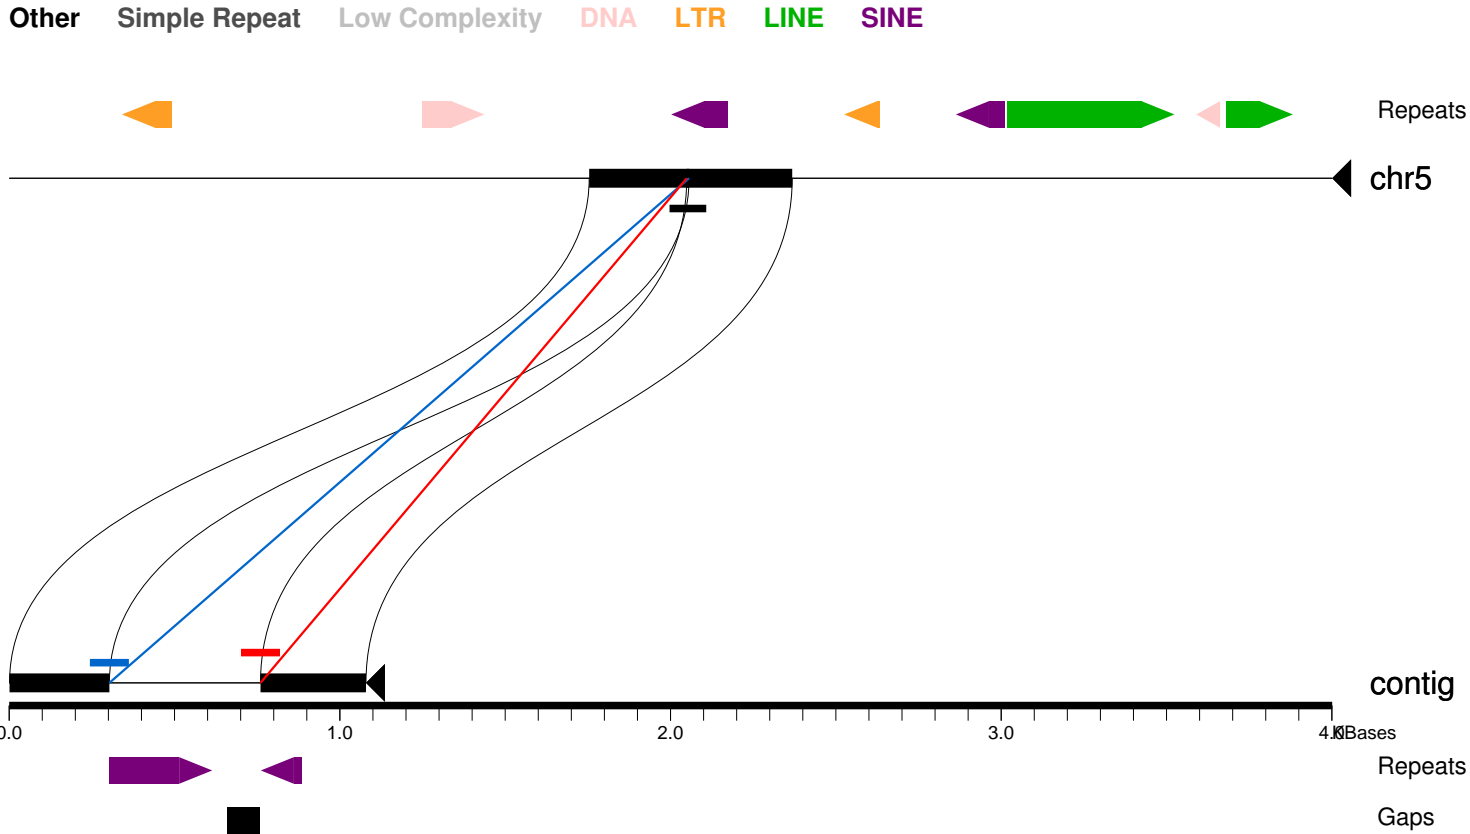

siteID: chr5\_71412961 Scaffitg1 - Breakpoint: chr5:71412949

chr5:71412904-71413008

Overlap Length: 15 INS size: 435 Genotyped: No

```

left   AG-CAAGAAATGGTTTATTAAAA-GTT--AACTTCCTGCAA-AGCCACAT-----GAAAAATCAGT
chrom  AG-CAAGAAATGGTTTATTAAAA-GTT--AACTTCCTGCAA-AGCCACAT-----GAAAAATCAGT
right  CCACCCGCCTCGGCCTCCCAAAGTGCTGGGATTACAGGCGTGAGCCACCGCGCCCGGCCGAAAAATCAGT
      111*11*1111**11*111***11*1*111*1*1*11**111*****111111111111******
left   TTTT TTTTNNNNNNNNNNNNNNNNNNNNNNNNNNNNNNNNNNNNNNNNNNNNNNNNNNNNNNNNNN
chrom  TTTTAAAGT-----AACTTTGCTTTGAGAAAAAAGGAATCCAGAGACTGTCAGAC
right  TTTTAAAGT-----AACTTTGCTTTGAGAAAAAAGGAATCCAGAGACTGTCAGAC
      ***222*2222222222222222222222222222222222222222222222222222222222

```

Other Simple Repeat Low Complexity DNA LTR LINE SINE

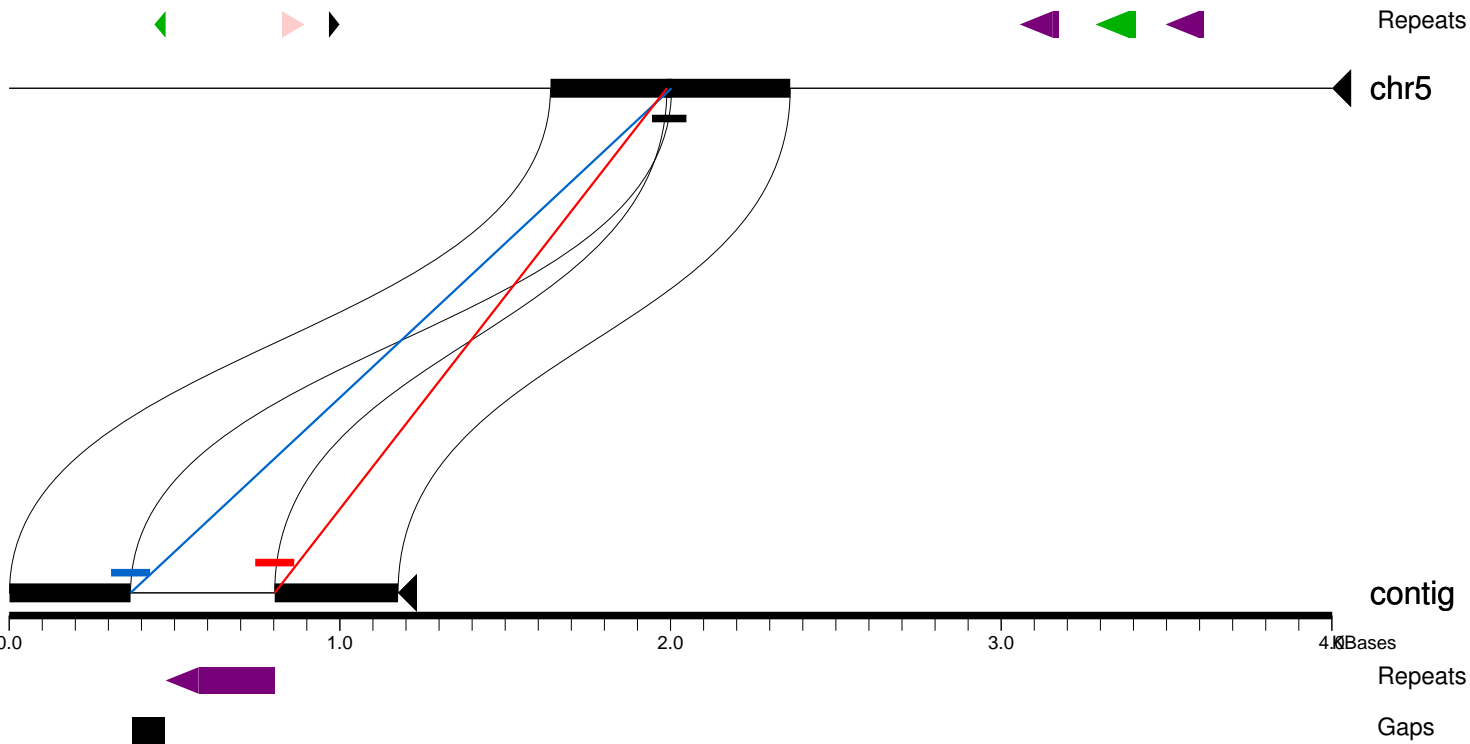

siteID: chr5\_73145907 Scaffitig1 + Breakpoint: chr5:73145911

chr5:73145863-73145970

Overlap Length: 12 INS size: 479 Genotyped: No

```

left      GGATTTATTTTATTC CCTCTCTTTTTTTCTTATT-CTTGCTTATTAAATT-----GTTATTTTGCA
chrom     GGATTTATTTTATTC CCTCTCTTTTTTTCTTATT-CTTGCTTATTAAATT-----GTTATTTTGCA
right    CCGCCCGCCTCGGCCTCCCAAAGTGCTGGGATTACAGGCGTGAGCCACCGCGCCCGGCCGTTATTTTGCA
          1111111111*11111*1*1*11111*11*111***1*11**1*11111*111111111111111*
    
```

```

left      TNNNNNNNNNNNNNNNNNNNNNNNNNNNNNNNNNNNNNNNNNNNNNNNNNNNNNNNNNNNNNNNNNNNN
chrom     TTTTATGCCATGCAGAACAACTGAAAACATAATCTTGGTGCTTGAA-----
right    TTTTATGCCATGCAGAACAACTGAAAACATAATCTTGGTGCTTGAA-----
          *2222222222222222222222222222222222222222222222222222222222222222
    
```

Other   Simple Repeat   Low Complexity   DNA   LTR   LINE   SINE

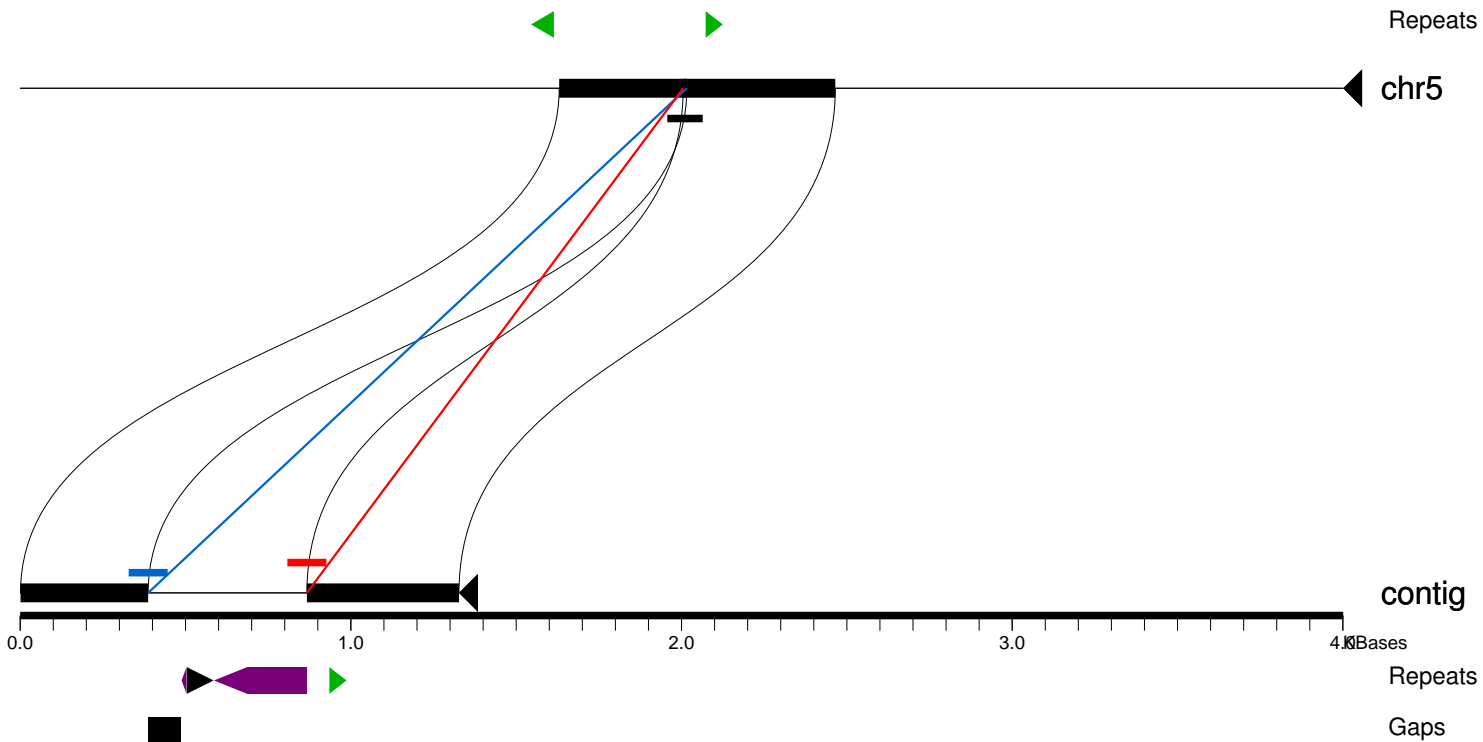



siteID: chr5\_74323808 Scaffitig1 + Breakpoint: chr5:74323794

chr5:74323750-74323853

Overlap Length: 16 INS size: 297 Genotyped: Yes

```
left  ATTCATGATACTGTTTTGTAACAT-----GATAAAAAATGTTGTATAAAAT-----CCCTTCGCTCC
chrom ATTCATGATACTGTTTTGTAACAT-----GATAAAAAATGTTGTATAAAAT-----CCCTTCGCTCC
right CCGCCCGCCTCGGCCTCCCAAAGTGCTGGGATTACAGGCGTGAGCCACCGCGCCCGGCCCCCTTCGCTCC
      111*11*111*1*11*111**11*11111***1*1*1111**1111*1111111111111*****
```

```
left  TCTTTTTTTTTTTTTTTTTTTTTTGGAGACGGAGTCTCGCTCTGTTCGCCAGGCTGGAGTGCAGTGGC
chrom TCTTTAGGTACTACCTGTCCCAACCCACATCCTCA-----CCCCCTTCCTTAA-----C
right TCTTTAGGTACTACCTGTCCCAACCCACATCCTCA-----CCCCCTTCCTTAA-----C
      ***222*22*222*2*222*22*22*22***2222222*2***222*22*222222222*
```

Other Simple Repeat Low Complexity DNA LTR LINE SINE

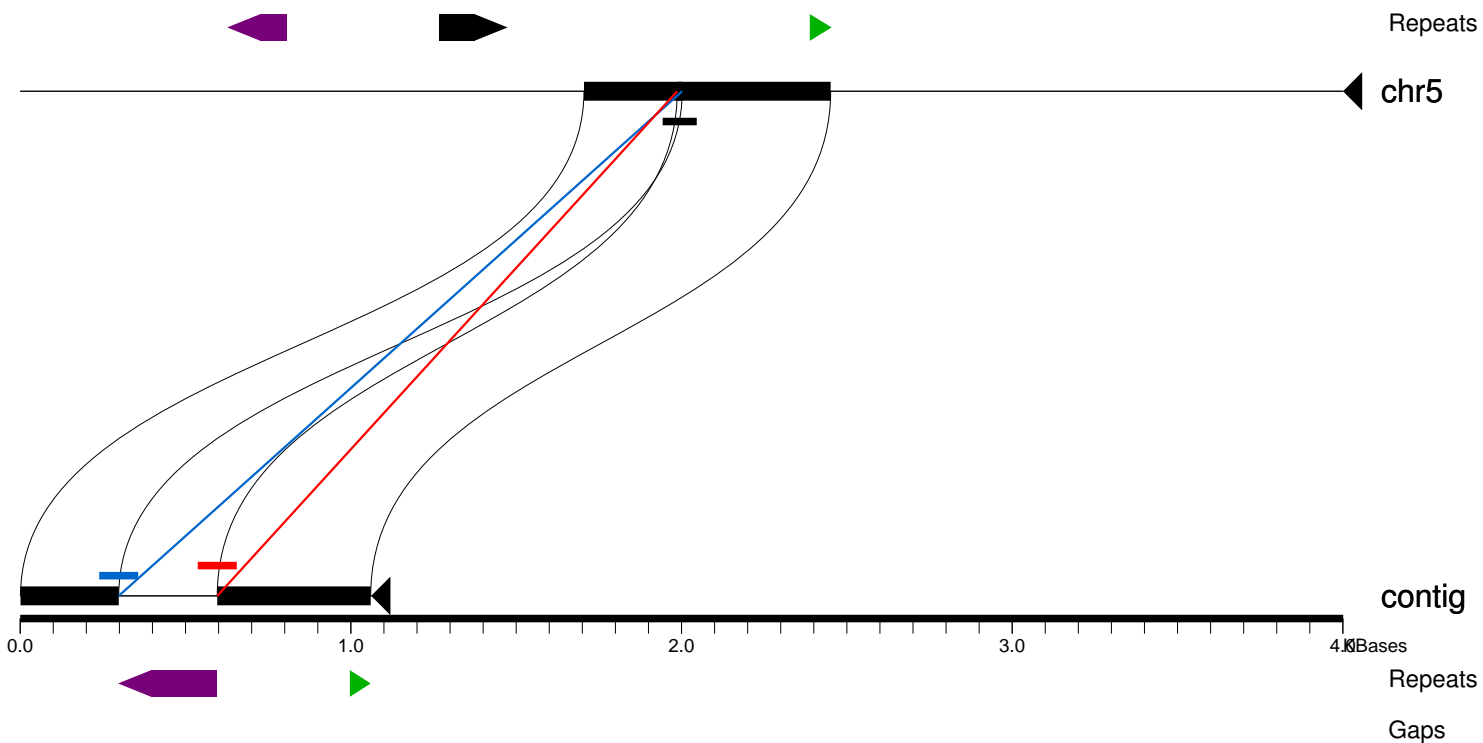

siteID: chr5\_76368938 Scaffitig2 + Breakpoint: chr5:76368927

chr5:76368874-76368986

Overlap Length: 7 INS size: 211 Genotyped: Yes

```
left  TGCTGAATGCT-----GAAGGAGAGGAATTTTGTCTACAAACAAAATTTTTTTATCATAA
chrom TGCTGAATGCT-----GAAGGAGAGGAATGTTGTCTACAAACAAAATTTTTTTATCATAA
right TGTCAGTCCGCCGTCCGGCCTGGGCGACAGAGCGAGACTCCGTCTCAAAAAAAAAA-----AAA
**111*1*1*11111111111111111111**11***1*11*1N11****11***1***1111111111*1**
```

```
left  AAGTACTAACAAGGTGAAACCCCGTCTCTACTAAAAATACAAAAAATTAGCCGGGC-----GCGGTGGC
chrom AAGTAAAT-----TCATACTTTGTGTAAA---AAATTACAACAATGCAGAAAGTGTATAAAGCAGAAA-
right AAGAAAT-----TCATACTTTGTGTAAA---AAATTACAACAATGCAGAAAGTGTATAAAGCAGAAA-
***1*2*2222222*2*2**222**2*22*222***2*****2**222**22*2*222222**2*2222
```

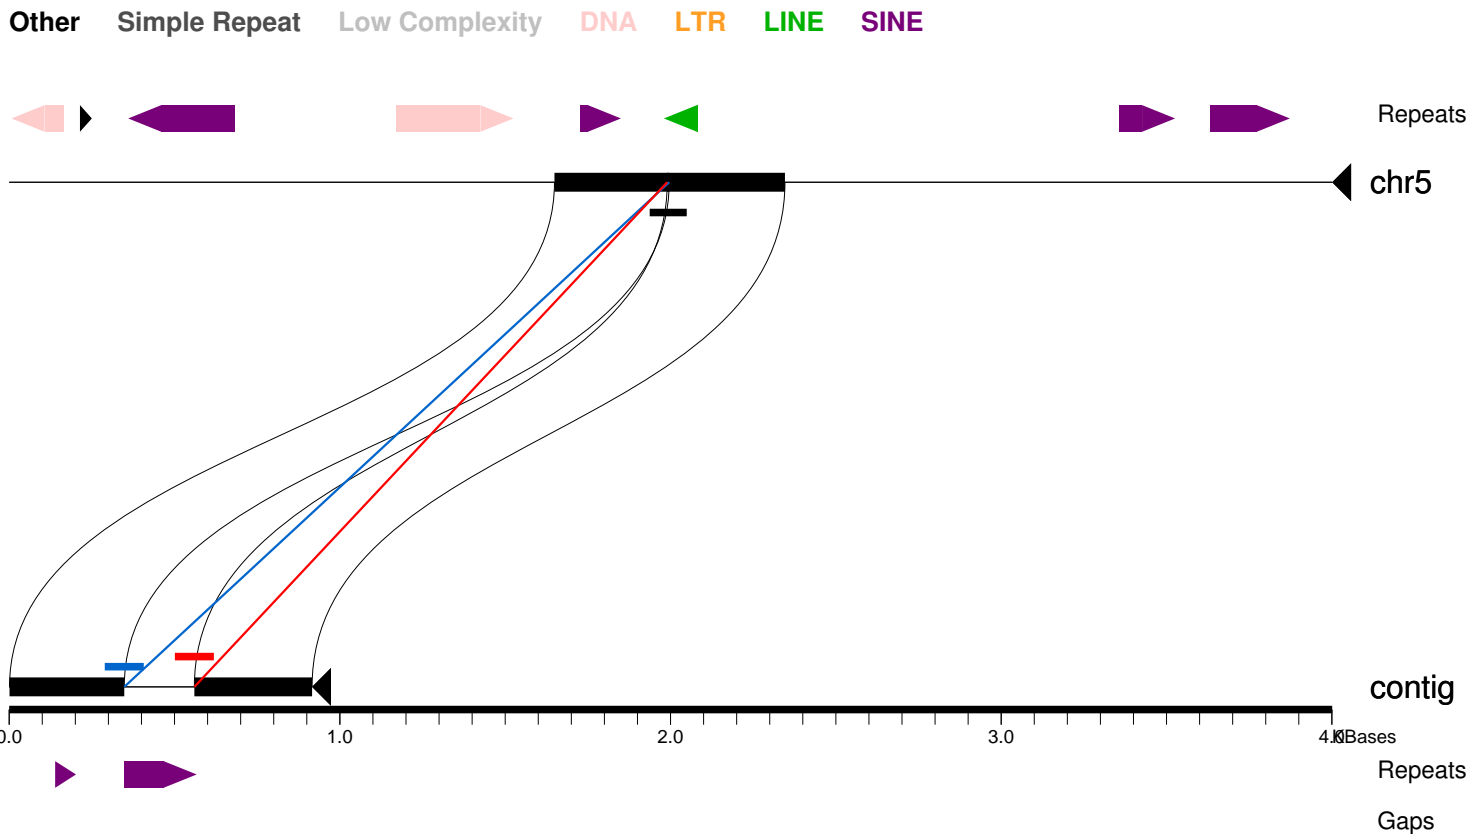



siteID: chr5\_76753600 Scaffitig3 - Breakpoint: chr5:76753594

chr5:76753545-76753653

Overlap Length: 11 INS size: 316 Genotyped: Yes

```
left    ---AGTATTTCTCATATTAGGGATA-----TAAATTTCTTGGATAAACTATCTATTC AAGAACA ACTG
chrom   ---AGTATTTCTCATATTAGGGATA-----TAAATTTCTTGGATAAACTATCTATTC AAGAACA ACTG
right   GTCCGGCCTGGGCGACAGAGCGAGACTCCGTCTCAAAAAAAAAAAAAAAAAAAAAAAAAAAAAA AAGAACA ACTG
        1111*111*111*11111**1**1*1111111*1**11111111*1***11*111*111*****

left    GGCCGGGCGCGGTGGCTCACGCCTGTAATCCCAGCACTTTGGGAGGCCGAGGCGGGTGG
chrom   AACCA----CTGAACTAAATGAGTGCAATGCTA---TTTTTTAA---CAATTTTATGT
right   AACCA----CTGAACTAAATGAGTGCAATGCTA---TTTTTTAA---CAATTTTATGT
        22**22222*2*222222*2*22**2***2*2*2222***222*222*2*222222**2
```

Other Simple Repeat Low Complexity DNA LTR LINE SINE

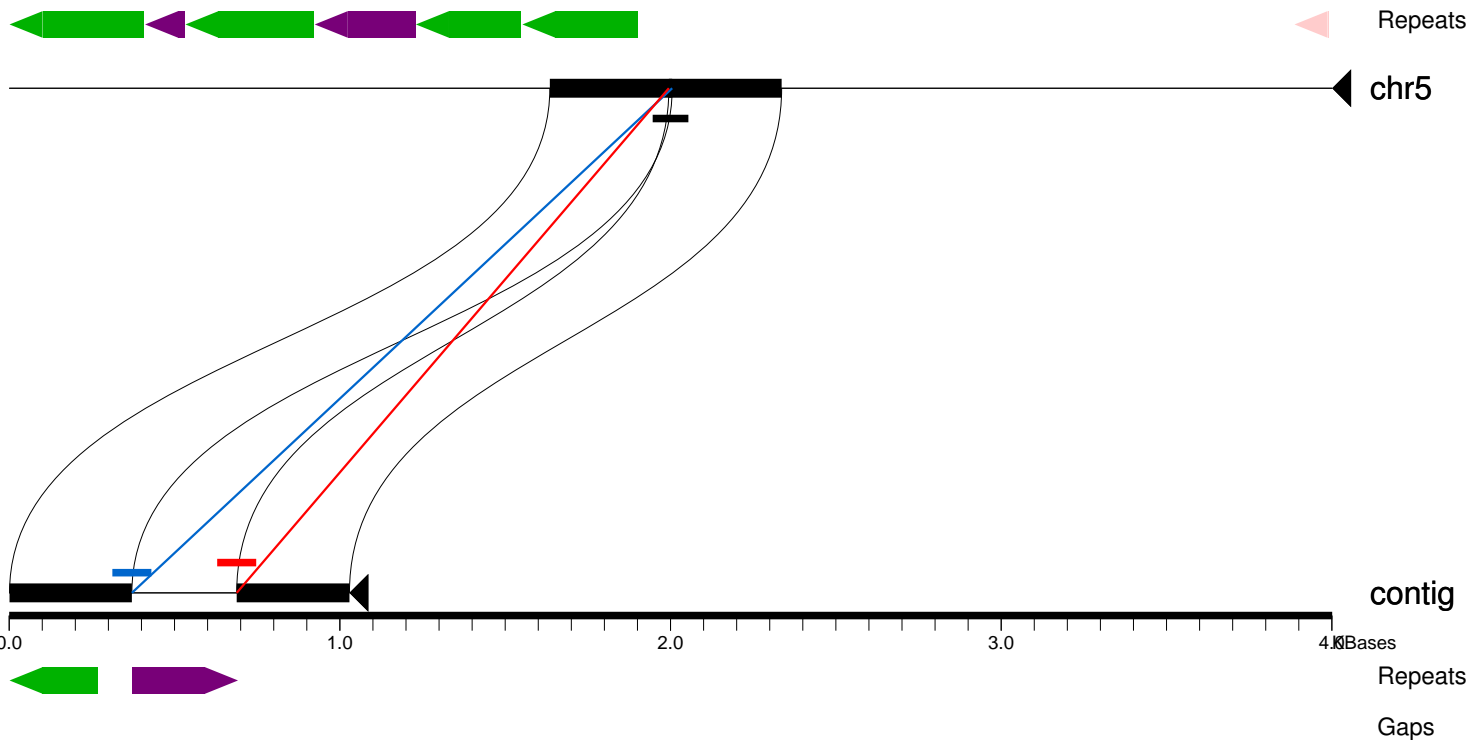

siteID: chr5\_77654193 Scaffoldig1 + Breakpoint: chr5:77654170  
chr5:77654128-77654209  
Overlap Length: 18 INS size: 301 Genotyped: Yes

```
left  G-----ACTCCATTATACATT-----TATGT----AAAATAATGTA  
chrom G-----ACTCCATTATACATT-----TATGT----AAAATAATGTA  
right AGTGAGCCGAGATTGCGCCACTGCACCTCCAGCCTGGGCGACAGCGAGACTCCGTCTCAAAAAAAAAAAAAA  
111111111111111111111111***1**1*1111*1*1111111111111111*11**11111***1**111*  
  
left  TAGAGATGTAAAAATAAAAAATGCAGGCCGGCGCGGTGGCTCACGCCTGTAATCCCAGCACTTTGGGA  
chrom TAGAGATGTAAAAAATAAAAAATGCAGATCCAGAGCC-----CCT---ACCTCAGAT-----  
right TAAAAATAAAAAATAAAAAATGCAGATCCAGAGCC-----CCT---ACCTCAGAT-----  
**1*1*111******22*22*2**2222222222***222*2*2***2222222222
```

```
left  GGCCGAGGCGGGCGGA  
chrom -----  
right -----  
2222222222222222
```

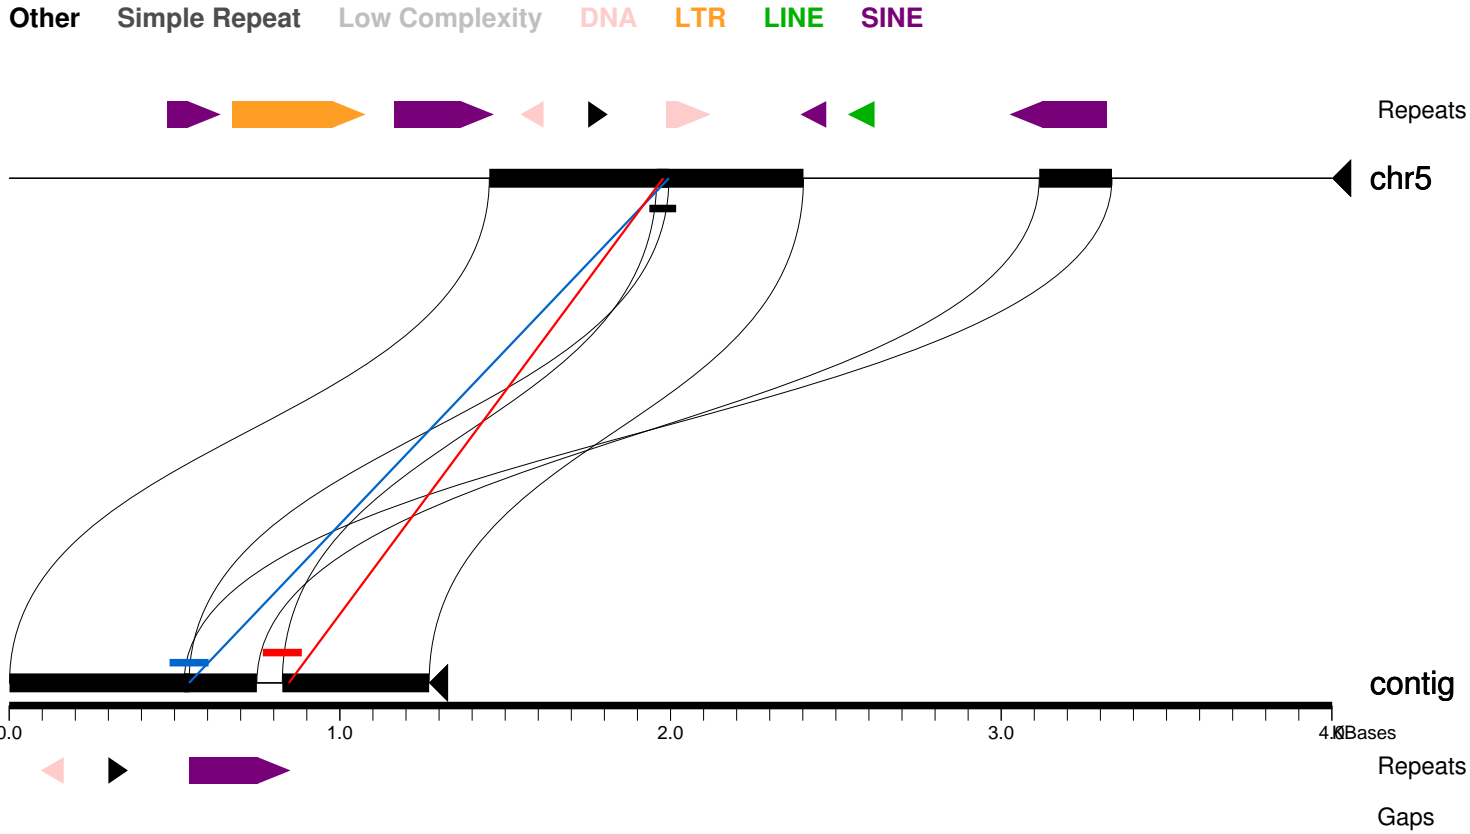

siteID: chr5\_78253754 Scafftig2 - Breakpoint: chr5:78253752

chr5:78253700-78253845

Overlap Length: 8 INS size: 310 Genotyped: Yes

```
left  GAGCCAAC TCCAGCCACCAGCCAAGGTCCAGATGGGGATAGGATTAATAATCGGAAGTC TG-----
chrom GAGCCAAC TCCAGCCACCAGCCAAGGTCCAGATGGGGATAGGATTAATAATCGGAAGTC TACAACAATTT
right AAAAAAA-----AAAAAAAA-----AAAAAAAAAGGAAGTCTACAACAATTT
1*111**11111111*11*111**111111111111111111*11*****11*****2222222222
```

```
left  GCCGGGCGCGGTGGCTC-----ACGCCTGTAATCCCAGCAC-----TTTGGGAGGCCGAGGCGGG
chrom GCAGCCCACGTAAAGTTTTAAAAAAAAATCAGGAAATATCACATCGATCTGTTTTTATATAAAAAAACTTT
right GCAGCCCACGTAAAGTTTTAAAAAAAA-TCAGGAAATATCACATCGATCTGTTTTTATATAAAAAAACTTT
**2*22*2**22222*222222222*N2*22*2***22*222*2222222***222*22222*22*222
```

```
left  C---GG
chrom TTTGGA
right TTTGGA
2222*2
```

Other Simple Repeat Low Complexity DNA LTR LINE SINE

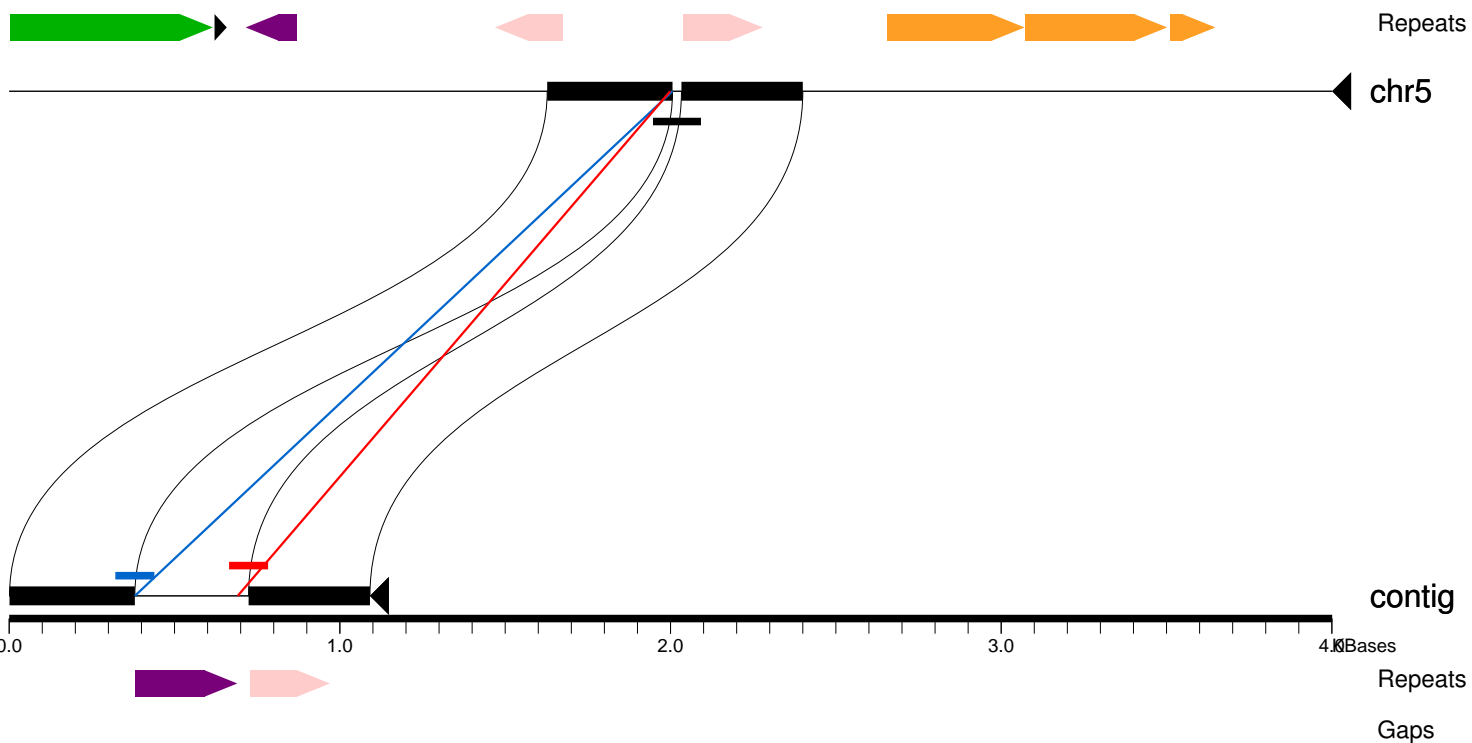

siteID: chr5\_7846038 Scaffoldig2 + Breakpoint: chr5:7846040

chr5:7845994-7846099

Overlap Length: 14 INS size: 362 Genotyped: No

```

left  GGGCTC-CCTGAAGGGAGCTGCTTCAGAGGATTAGA-----AGCCACAGATT-----GACACTCACAT
chrom GGGCTC-CCTGAAGGGAGCTGCTTCAGAGGATTAGA-----AGCCACAGATT-----GACACTCACAT
right CCGCCCGCCTCGGCCTCCCAAAGTGCTGGGATTACAGGCGTGAGCCACCGCGCCCGGCCGACACTCACAT
      11**1*1***111111111*1111*1111*****1*111111*1111111111*1111111111*

```

```

left  TTTTNTTTTTNNNNNNNNNNNNNNNNNNNNNNNNNNNNNNNNNNNNNNNNNNNNNNNNNNNNNNNNNNNNNN
chrom TTTGCCTT-----CACCTGTGTTAATTTCTGACAGCAAACGAGGGTCAGGGATA
right TTTGCCTT-----CACCTGTGTTAATTTCTGACAGCAAACGAGGGTCAGGGATA
      **222**22222222222222222222222222222222222222222222222222222222222222

```

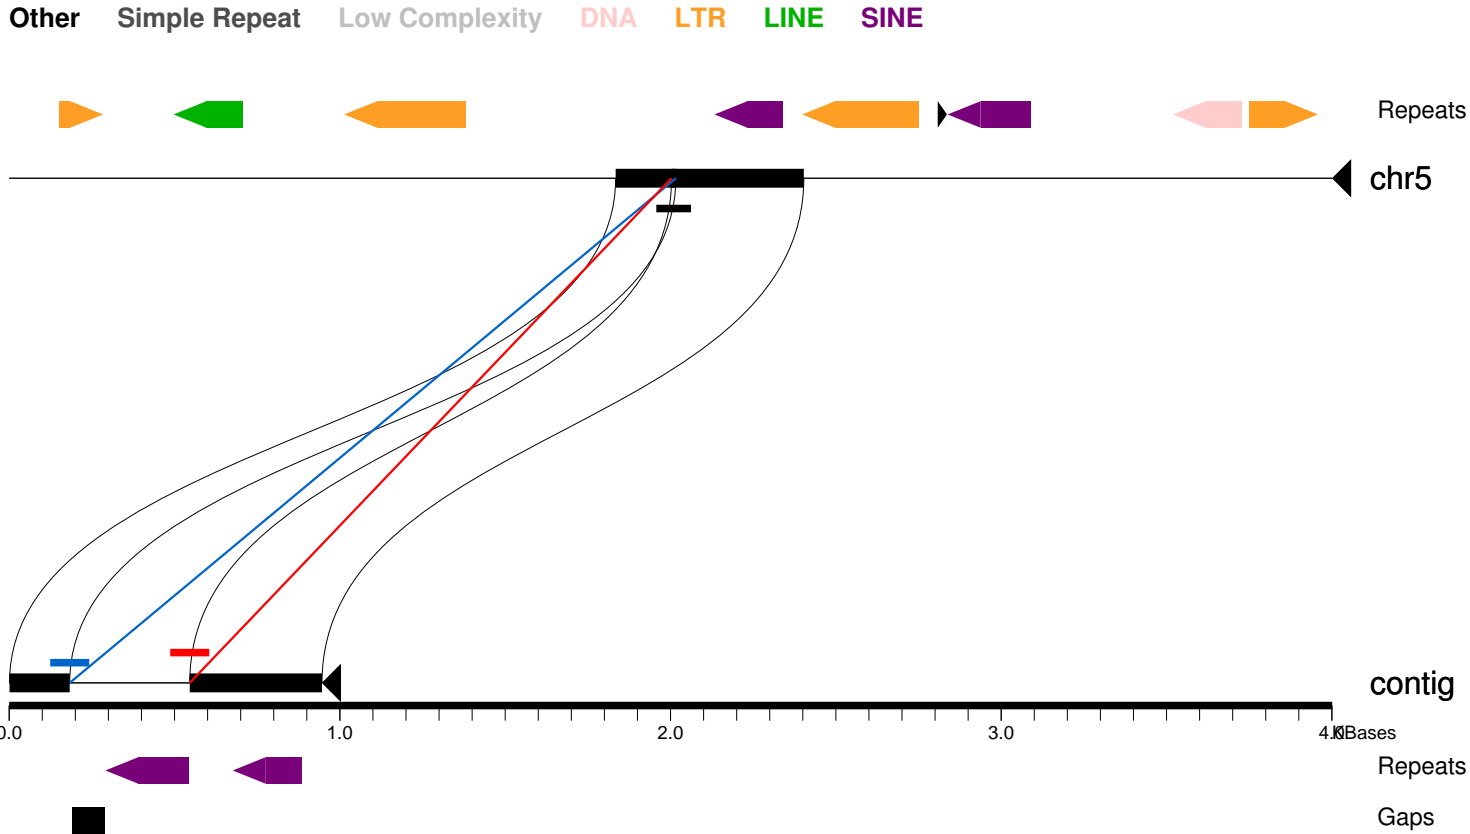

siteID: chr5\_83127435 Scaffitg5 - Breakpoint: chr5:83127420

chr5:83127260-83127592

Overlap Length: 13 INS size: 307 Genotyped: Yes

```
left -----GGACTTGGCTGACTGATACACACAAATCATGTTTGGTTGCTCTAACAAGTATTTTTCTT
chrom AAAAGAGAGCAAAGGACTTGGCTGACTGATACACACAAATCATGTTTGGTTACTCTAACAAGTATTTTTCTT
right G---GAGA---ATGGCGTGAACCCGGG-AGGCGCA-----GCTTGC-----AGT-----
N 2222 21*1*1**1111*1*11*11*1**111111*1***11N11111111***111111111
```

```
left AACGAGCC-AGATTTTCCTATTGTTTAAATTTGTTTCCTTAATTCTTCCAAGCGATTGGAGTGCTATGCC
chrom AACGAGCC-AGATTTTCCTATTGTTTAAATTTGTTTCCTTAATTCTTCCAAGCGATTGGAGTGCTATGCC
right ---GAGCCGAGATCCC GCCACTGC---ACTCCAGCCTGGG--CGACAGAGCGAGACTCCGTCTCAAAAA
111*****1***1111*1*1**11111*1*1111***11111*11*11*****11111111**111111
```

```
left TGGAGTATCAAAACTGCCTTTAATGTTACCTGAGGCCGGGCGCGGTGG-CT--CACGCCTGTAATCCCA
chrom TGGAGTATCAAAACTGCCTTTAATGTTACCTGAGTGTCCCAAATGTTATACTTCCAAAAGCGTAGTTGAG
right AAAAAAAAAAAAAAAAAAAAAAAATGTTACCTGATGTCCCAAATGTTATACTTCCAAAAGCGTAGTTGAG
111*11*11***111111111*****111111111*2*2*222222*2*222**22**22222***2*2222
```

```
left GCACTTTGGGAGGCCGAGGC-----GGGC-----GGATCACGAGGT----CAGGAGATCG-A
chrom GCAGTT-GAGAAGATCTGGCTCAATTTAATGTTCAATTTTAAGTACCAGGGGCTTTTGCATGATATCTTA
right GCAGTT-GAGAAGATCTGGCTCAATTTAATGTTCAATTTTAAGTACCAGGGGCTTTTGCATGATATCTTA
***2*2*2*2*2222***2222222222*22*22222222*2*2**2*2*2*2222**2**2***22*
```

```
left GACCATCCC---GGCTAA-----AACGGTGAAACCCCGTCTCTACTAAA
chrom TTCTCTCCCTGGAGGATTATATTAATTTGGAACAGGAACACTGAAAGTGGTAACACA
right TTCTCTCCCTGGAGGATTATATTAATTTGGAACAGGAACACTGAA-----
22*22***2222*2*2*2222222222***2*22*2**2222NNNN11NN1N1
```

Other Simple Repeat Low Complexity DNA LTR LINE SINE

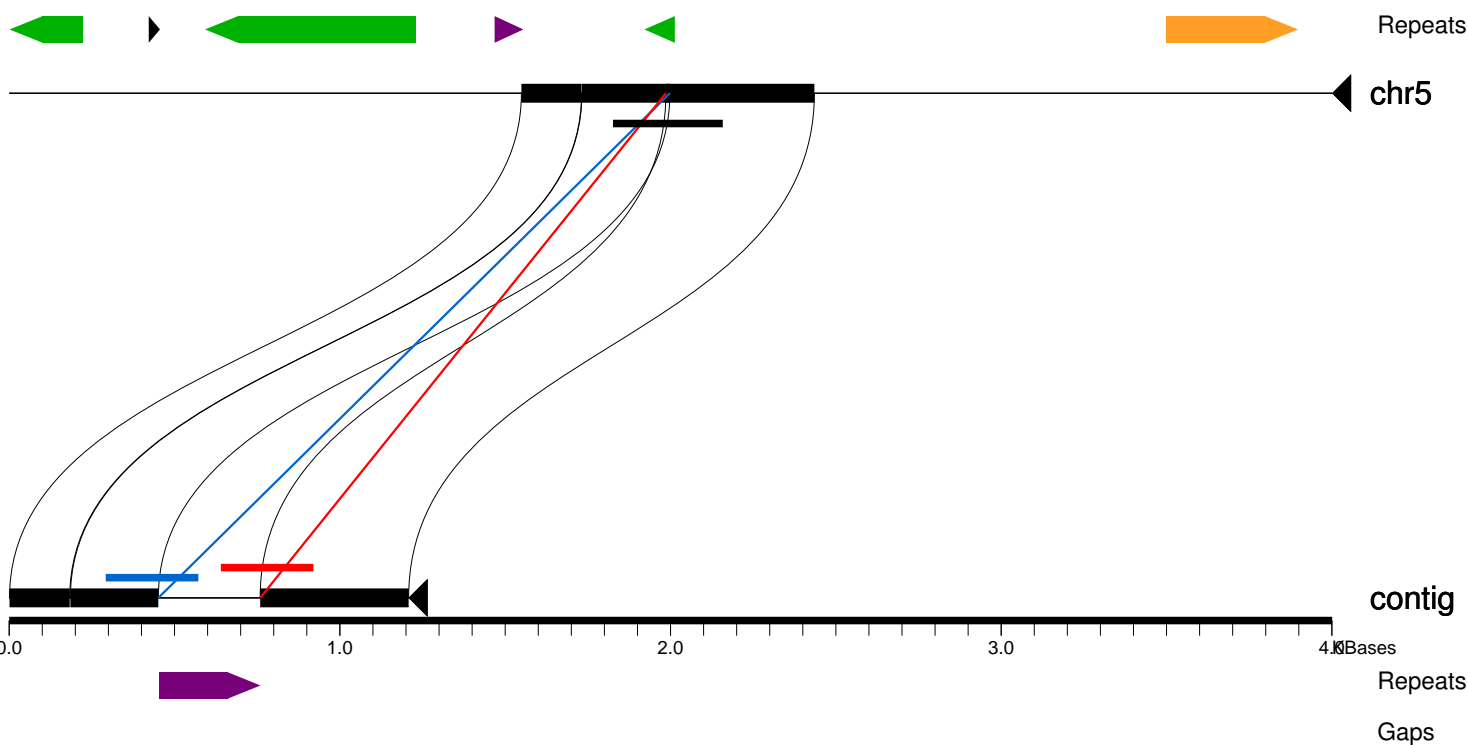



siteID: chr5\_84384456 Scaffitg1 - Breakpoint: chr5:84384476

chr5:84384433-84384535

Overlap Length: 17 INS size: 318 Genotyped: Yes

```
left  AGTTGAAG--AGACT-----AACATTTGGAAATGGAAGAAAAATTTTCTTAAAAAAATTA
chrom AGTTGAAG--AGACT-----AACATTTGGAAATGGAAGAAAAATTTTCTTAAAAAAATTA
right CGACAGAGCGAGACTCCGTCTCAAAAAAAAAAAAAAAAAAAAAAAAAAAAAAAAAAAAAA
1*1111**11*****1111111111111111**1*11111***111**1*****1111111*1***1*****
```

```
left  ATTGCAGGCCGGGCGCGGTGGCTCACGCCTGTAATCCCAGCACTTTGGGAGGCCGAGGCGGGCGG
chrom ATTGCATT-----TTGTTTA----TCTAATTCCATGGATAAGTAAA--AGAGTAGTCCTT
right ATTGCATT-----TTGTTTA----TCTAATTCCATGGATAAGTAAA--AGAGTAGTCCTT
*****222222222222*2*2*2*2222*2*****2***2222*22*22*2222***22*22*22
```

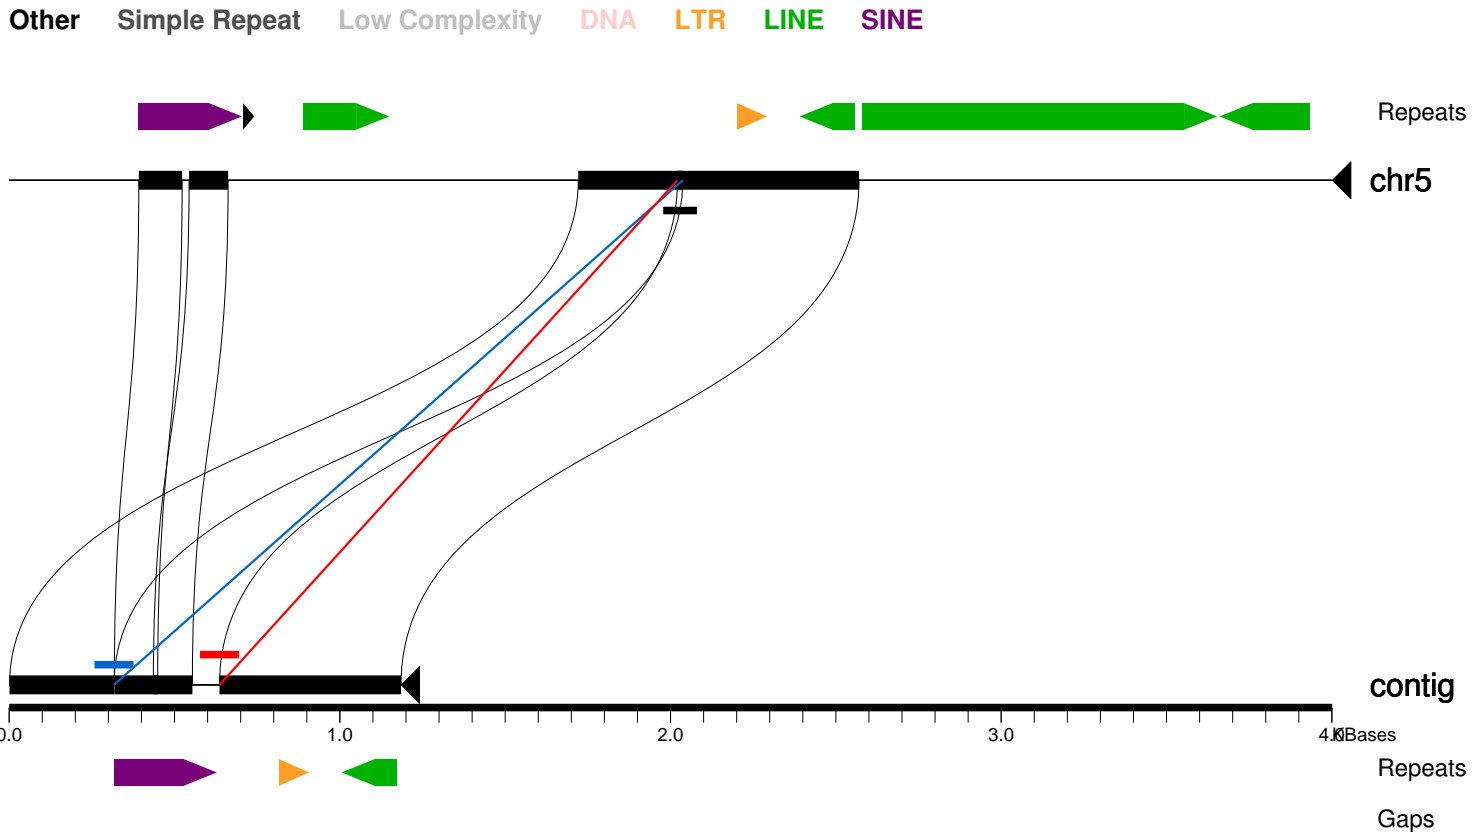

siteID: chr5\_84929800 Scaffitg3 - Breakpoint: chr5:84929774

chr5:84929614-84929951

Overlap Length: 18 INS size: 327 Genotyped: Yes

```

left -----TC-CATTATCTATGAATAATTTGTGG-GTATGTATTTTTTAGAAACAAAGATA
chrom AAACAGTTACACAATACTC-CATTATCTATGAATAATTTGTGG-GTATGTATTTTTTAGAAACAAAGATA
right GG-CTGAGGCAGGAGAATGGCGTGAACCCGGGAG-----GCGGAGCTTGCAGTGAGCCGAGATTGCGCCA
NN 2N2NNN22NN2N2N*11*1*1*1*111*1*111111*1**1*11**1*1*11111*1*1111*11*
    
```

```

left TTT---TCTAACATAATCACCAGAATAAGAATATTAACATTGACACATTATTGCCATCTAATCCTCAGCC
chrom TTT---TCTAACATAATCACCAGAATAAGAATATTAACATTGACACATTATTGCCATCTAATCCTCAGCC
right CTGCACTCCAGCCTGGGCGACAGAGCGAGACT-----CCGTCTCAAAAAAAAAAAAAAAAAAAAAAATAAAA-
1*11111**1*1*1*111*11****111**1*11111*11*11**1*11*11111*111**111*1*111
    
```

```

left TTCATTCAACTTTCAACAATTTGTCTTAATAATTTACTTTATCGGC-----CGGGCGC-----
chrom TTCATTCAACTTTCAACAATTTGTCTTAAATAATTTACTTTATCGTAAAACTATCCAGTTCAAAAATAAAACT
right ---ATAATAATAATAATAATAATAATAATAATAATAATAATAATAATAATAATAATAATAATAATAATAACT
111**111*1*111**1**11*11*****22222222*22*22*2222222222
    
```

```

left GGTGGCTCACGCCTGTAAT----CCCAGC-----ACTTTGGGAGGCCGAGCGGGCGGATCAC
chrom GTTTGCTTTTAGTTGTTCATGTGTCTCATTTTTCTTTGAAATTTACTTTGACTTTCCCTATTCTGTATAATTTTC
right GTTTGCTTTTAGTTGTTCATGTGTCTCATTTTTCTTTGAAATTTACTTTGACTTTCCCTATTCTGTATAATTTTC
*2*2***222222***2**2222*2**222222222222222*****22222*2*22*2*2222**22*
    
```

```

left GAGGTCAGGAGATCGAGACCATCCC--GGCTAAAAC--GGT----GAAACCCCGTCTCTACTAAA
chrom TAAAACTATGGAACAAGTGTTTTTTTGTAGAAATATTTCCAGGTTTGGGAAACAATTTGAGTATGC--
right TAAAACTATGGAACAA-----
2*222*2222**2*2*1NNNN1NNN 1NN1NNN1 111 11111NNNN1NNN1NNN22
    
```

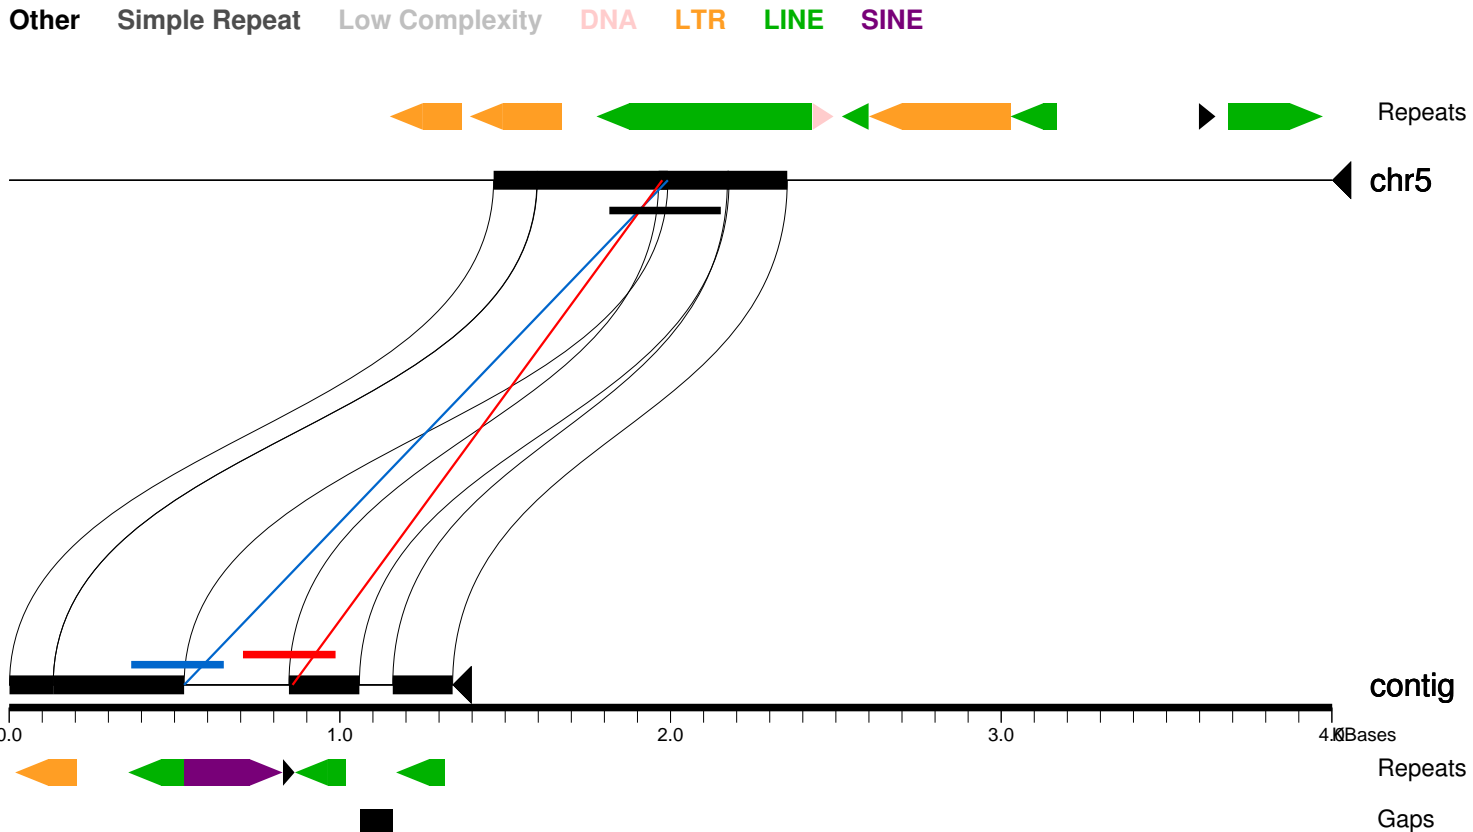

siteID: chr5\_85764868 Scaffitg1 - Breakpoint: chr5:85764950

chr5:85764790-85765120

Overlap Length: 11 INS size: 99 Genotyped: Yes

```
left      T-----GCCTTAATAGAATTGAAAAATTAAGAAATAATTGCAGTCTAGTGTTCCTTAGAGATAACAATGA
chrom     TATTTGCTGCCTTAATAGAATTGAAAAATTAAGAAATAATTGCAGTCTAGTGTTCCTTAGAGATAACAATGA
right     CAG-----GGCTTCATAAACTT-----TTTTT-----TTTTTTTTTTTTGAGACG-----
12N      *1***1***1*1**1111111111111*11**111111*11*1**1***1****1111111111
```

```
left      TGATACACTTTTCTTGGCTTTGACCATCAATATATTACCATTAATGTTCCATTATTATATTTAAAAGCAT
chrom     TGATACACTTTTCTTGGCTTTGACCATCAATATATTACCATTAATGTTCCATTATTATATTTAAAAGCAT
right     -GAGTCTC-----GCTCTGTCGCCAGGCTGG----AGTGCAGTGGCGCGATCTCGGCTCACTGCAA
1**11*1*111111111***1**1*111**111*1111111*1*111**11*111**1111111*1*11***1
```

```
left      TATTACCTAAAGCAGGGCT----TCATAAACTTTT-----TTTTTT-----TTTTTTTTTGGAGACGG
chrom     TATTACCTAAAGCAGGGCT----TCATAAACTTTTCTACTAAAGGGCCACATAGTAAATAATTTAGGTTG
right     GCT--CCGCCTCCCGGGTTCACGCATATAAACTTTTCTACTAAAGGGCCACATAGTAAATAATTTAGGTTG
11*11**111111*1***1*11111******1*2*22*2222222222222*222*22**2**222*
```

```
left      AG--TCTCGCTCTGTCTG-----CCCAGGC--TGGAGTGCAGT---GGCGCGAT----CTCGGCTCAC
chrom     TGCATGTCAAATGGTCCCTAGAACAACAAAAGCCATAGACAACACATAAGACTCAATAGGACAGTGTACCA
right     TGCATGTCAAATGGTCCCTAGAACAACAAAAGCCATAGACAACACATAAGACTCAATAGGACAGTGTACCA
2*22*2**22222***222222222*22*2**22*2**222**22222*2*2*2**2222*222*22*22
```

```
left      TGCAAGCTCCGCCTCCCGGGTTCAC--GCCATAAACTTTTCTACTAA-----
chrom     AGAAAACTTTATTTTTAAGAATGAATGGCAGTCCGGTTTTGGCCCAAAGCTCATC
right     AGAAAACTTTATTTTTAAGAATGAATGGCAGTCCGNNNNNNNNNNNNNN-----
2*2**2**22222*2222*22*2*222**22*222N1111NNN1N11
```

Other Simple Repeat Low Complexity DNA LTR LINE SINE

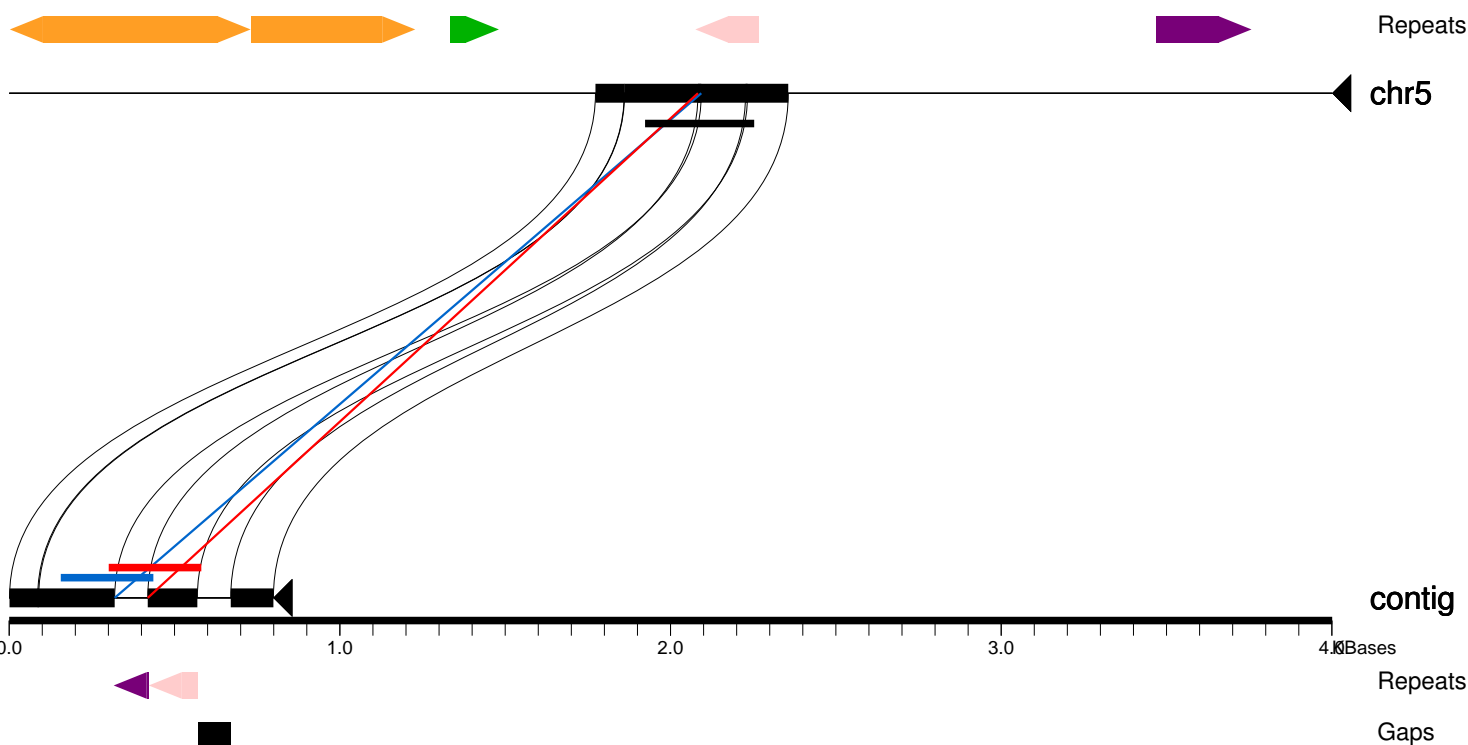



siteID: chr5\_87866349 Scaffitg1 - Breakpoint: chr5:87866342

chr5:87866182-87866515

Overlap Length: 14 INS size: 322 Genotyped: Yes

left -----GCTACCATATCCAGTGA--CTGGGAAGCATGGATATATAAAGTCCTAGC  
chrom TA-CTCCTTC-----CTGATGGCTACCATATCCAGTGA--CTGGGAAGCATGGATATATAAAGTCCTAGC  
right CAGCTACTCGGGAGGCTGA-GGCAGGAGAATGGCGTGAACCCGGGAGGC--GGAGCT-TGCAGTG--AGC  
N2122N22NN111112222 2\*\*111111\*\*111\*\*\*11\*1\*\*\*1\*\*11\*\*\*11\*1\*11\*\*\*111\*\*\*

left CTCCTTATC-CCAATGTGGAGAAACACTGAAGAGTCATCCCTGCAGGATAGTTCTCTAGGTGGCTGTGGA  
chrom CTCCTTATC-CCAATGTGGAGAAACACTGAAGAGTCATCCCTGCAGGATAGTTCTCTAGGTGGCTGTGGA  
right CGAGATCCCGCCACTGCACTCCAGC-CTGG-GCGACAGAGCG--AGACTCCGTCTCAAAAAAAAAATA---A  
\*1111\*11\*1\*\*\*1\*\*111111\*1\*1\*\*\*11\*1\*1\*\*\*111\*111\*\*11\*111\*\*\*1\*111111\*1111\*

left TTGGCTCTGTTCTCCCCTATTTCTTGCTTAAGAATAACTATAG---GGGCCGGGCGCGGTGGCTCACGCC  
chrom TTGGCTCTGTTCTCCCCTATTTCTTGCTTAAGAATAACTATAGAAATGTGCTGGGAATGCAGCATCCTGAG  
right ATAAATAAAATAAAATAAAATAAAATAAAAAAAAAAAGAATAACTATAGAATGTGCTGGGAATGCAGCATCCTGAG  
1\*111\*111\*11111111\*11\*11111111\*\*\*\*\*222\*2\*\*2\*\*\*222\*22\*22\*\*22\*22

left T---GTAATCCAGCACTTTGGGAG----GCCGAGGC---GGCGGATC----ACGAGGTCAGGA-GA--  
chrom ATGGGTGTGGAGAGAAGCTGGCAAGAACAGCCTGGGCTCTGTCCCAATCTCCCCTAGAACAGGATGACC  
right ATGGGTGTGGAGAGAAGCTGGCAAGAACAGCCTGGGCTCTGTCCCAATCTCCCCTAGAACAGGATGACC  
2222\*\*222222\*\*2\*22\*2\*22\*\*2222\*\*\*22\*\*\*222\*22\*22\*\*\*2222\*\*2\*22\*\*\*\*\*2\*22

left -TCGAGACCAT--CCCGCTAAAACGG-----TGAAACCCCGTCT---CTACTAAA-----  
chrom TTCAACACTTTAGCCCAGTGATCATGTGGCCCTGAGACTTAGGGTAGGCTGCTTCCCAGGGTC  
right TTCAACACTTTAGC-----  
2\*\*2\*2\*\*22\*22\*11N1NN1NN1N1N 111N11NNN1NN1 11N11NN

Other Simple Repeat Low Complexity DNA LTR LINE SINE

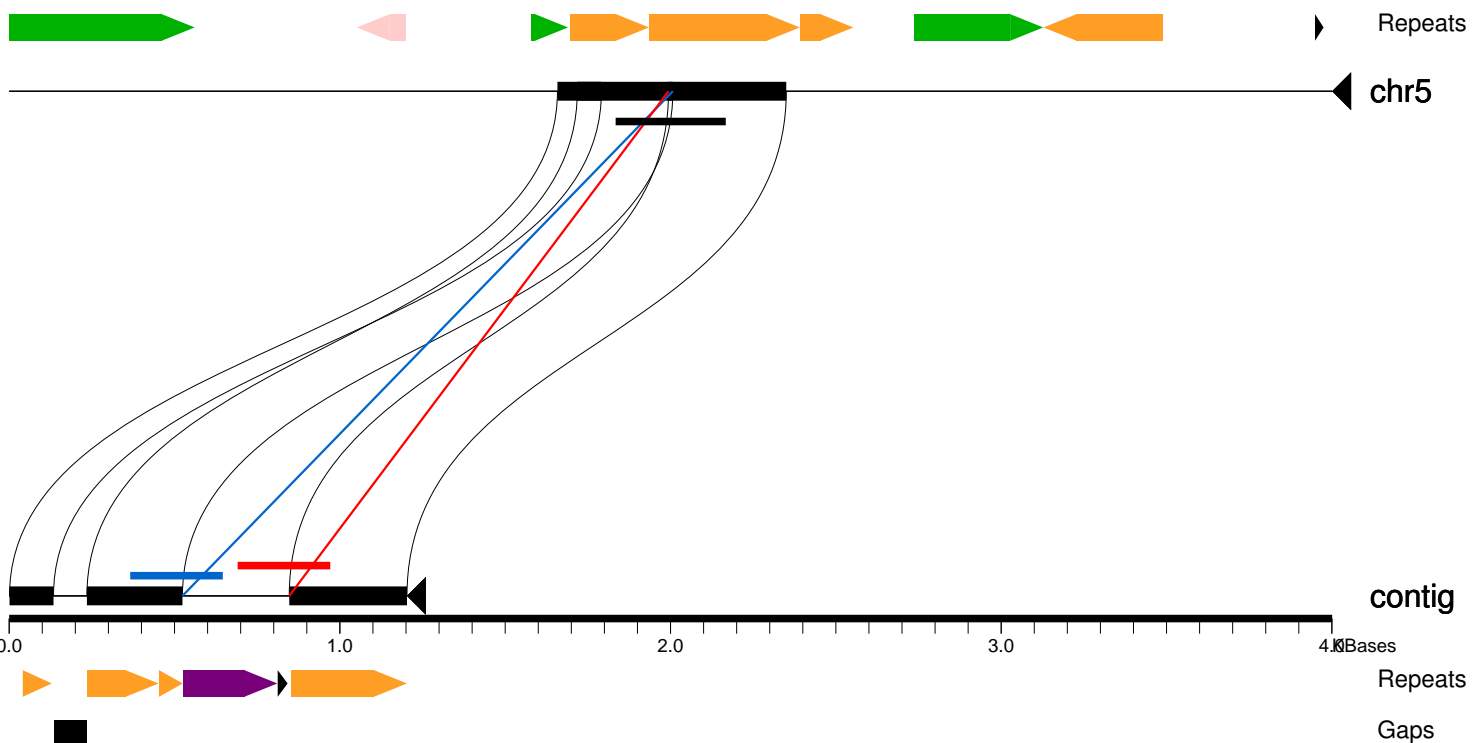

**siteID: chr5\_88804330 Scaffitig1 - Breakpoint: chr5:88804363**  
**chr5:88804321-88804422**  
**Overlap Length: 18 INS size: 392 Genotyped: No**

```

left   GTAAATGTGGTACATATACACCATGGAATATTATGCAGCC-----ACAAAAAGAACGA
chrom  GTAAATGTGGTACATATACACCATGGAATATTATGCAGCC-----ACAAAAAGAACGA
right  NNNNNNNNNNNNNNNNNNNNNNNNNNNNNNNNNNNNNNNNNNNNNNNNNNNNNNNNNNNNA
111111111111111111111111111111111111111111111111111111111111111
*****1*****

left   GATTGTGCGCCGGGCGCGTTGGCTCACGCCTGTAATCCCAGCACTTTGGGAGGCCGAGGCGGGTGA
chrom  GATTGTGCTTTT-GCG---GAACATGGATGGA-----TCTGGAGGCTAT--CATCATCA
right  GATTGTGCTTTT-GCG---GAACATGGATGGA-----TCTGGAGGCTAT--CATCATCA
*****2*22222***222*22**2*22**2*2222222222*22*****22222*222222*

```

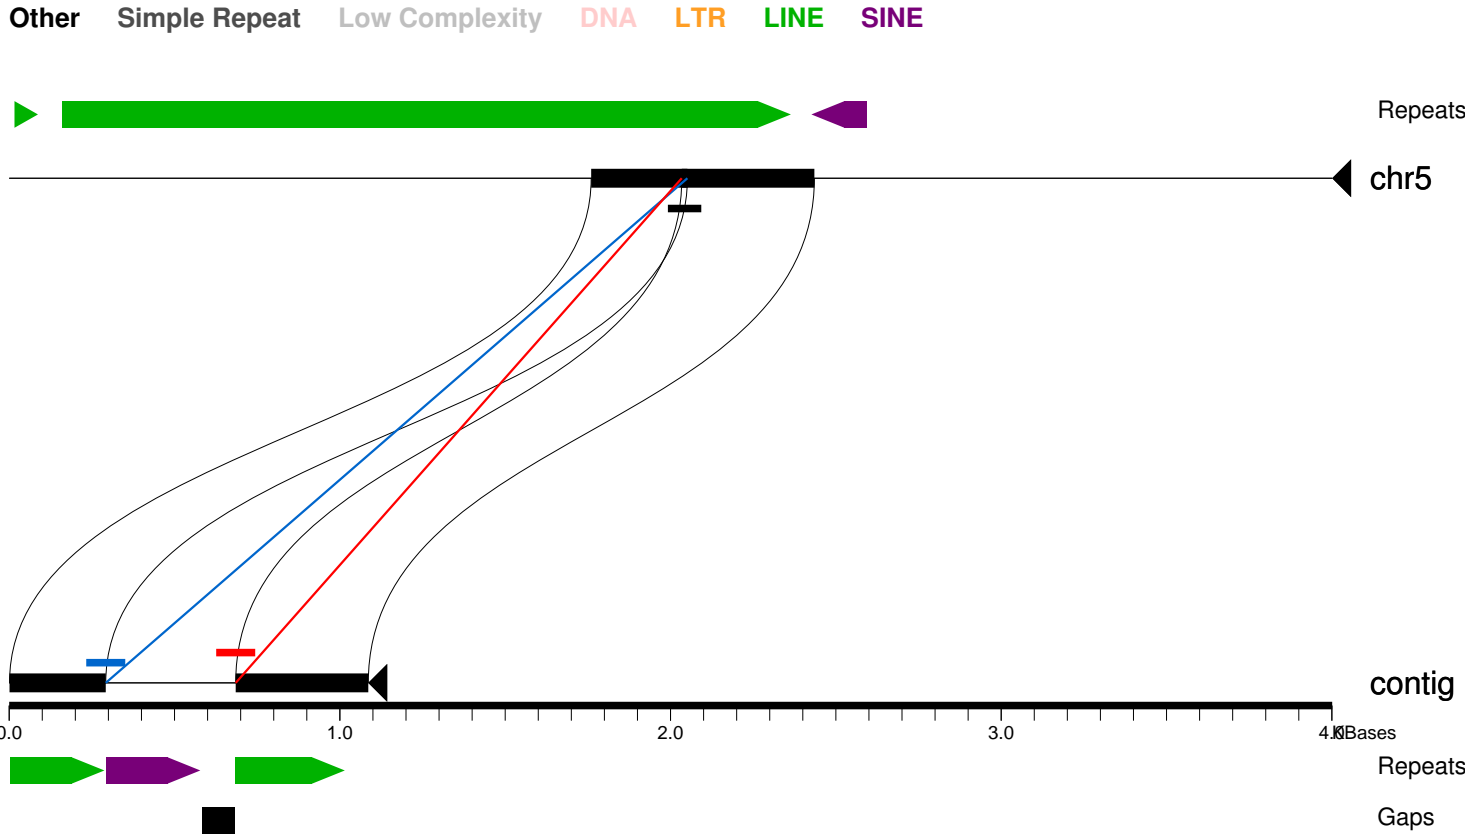

siteID: chr5\_89997884 Scaffitig4 - Breakpoint: chr5:89997825

chr5:89997775-89997884

Overlap Length: 10 INS size: 154 Genotyped: Yes

```
left  CCATA-ATTTTCTTTTTGAACCATTAACAAATTTTGTGATTTGAAAAGTTT-----GAAAACCATGC
chrom CCATA-ATTTTCTTTTTGAACCATTAACAAATTTTGTGATTTGAAAAGTTT-----GAAAACCATGA
right AGAGCGAGACTCCGTCTCAAAAAAAAAAAAAAAAAAAAAAAAAAAAAAAAAAAAAAAAAAAGAAAACCATGA
      11*111*111**11*1*1**11*11**1***1111111*1111****111111111111******2
```

```
left  TACTTGGGAGGCTGAGGCAGGAGAATGGCGTGAACCCGGGAGGCGGA---GCTTGCAGTGA
chrom CTCTTATGAA--AGAGTCACCAGAC-----AACACTGTAGGTGAAATAGCTT--AAT-A
right CTCTTATGAA--AGAGTCACCAGAC-----AACACTGTAGGTGAAATAGCTT--AAT-A
      22***22**2222***2**22***22222222***2*2*2***2*2*222****22*2*2*
```

Other Simple Repeat Low Complexity DNA LTR LINE SINE

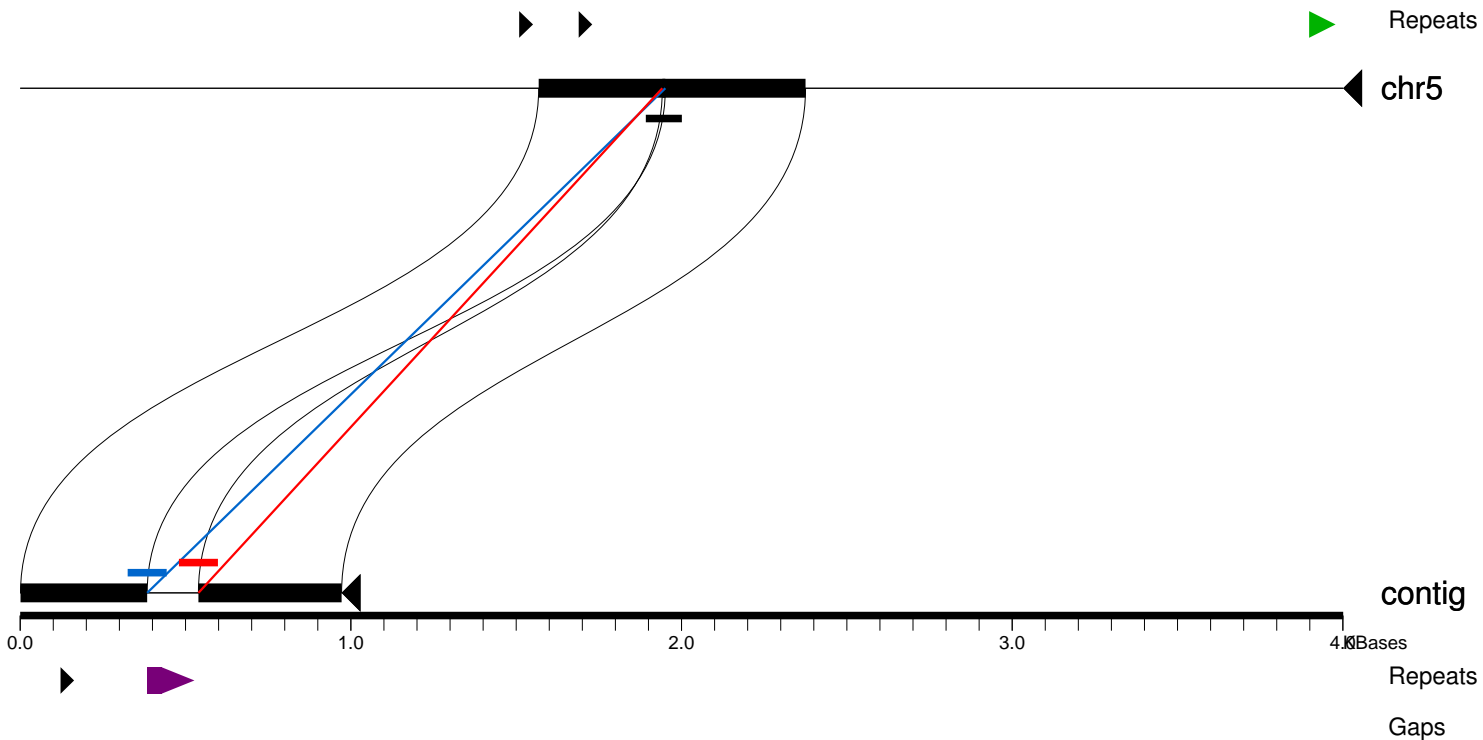

siteID: chr5\_90819294 Scaffold1 - Breakpoint: chr5:90819282

chr5:90819239-90819340

Overlap Length: 10 INS size: 422 Genotyped: No

```
left  -----CGTAGG-----AATTTATGCTTTTCTTTTCTATATCT-CAACTTTTTGTC-TCACATTTT
chrom -----CGTAGG-----AATTTATGCTTTTCTTTTCTATATCT-CAACTTTTTGTC-TCACATTTT
right TCCACCCGCCTCGGCCTCCCAAAGTGCTGGGATTACAGGCGTGAGCCACTGCGCCCGGCCTCACATTTT
111111111*1*1**11111111**1*11**111**11111*111*1*11*11*11111**1*****
```

  

```
left  TTTTTTTNNNNNNNNNNNNNNNNNNNNNNNNNNNNNNNNNNNNNNNNNNNNNNNNNNNNNNNNNNNNNN
chrom AATCTTT-----GCTTTTTTGTTCATATATCAAGAACTTTCTCTGAGTTTTTCT
right AATCTTT-----GCTTTTTTGTTCATATATCAAGAACTTTCTCTGAGTTTTTCT
22*2***222222222222222222222222222222222222222222222222222222222222222222
```

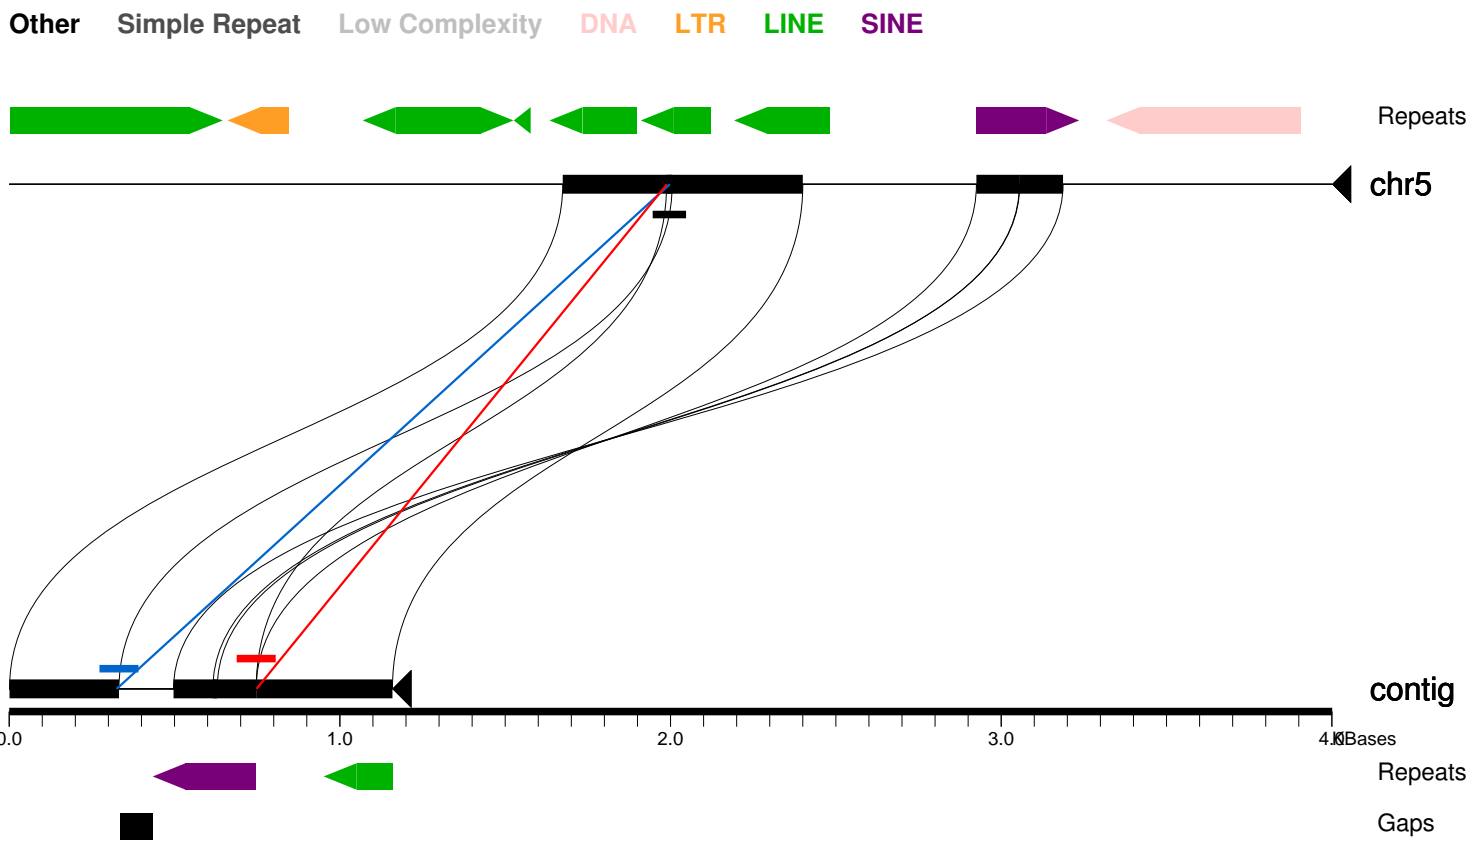



siteID: chr5\_91031054 Scaffitig1 - Breakpoint: chr5:91031017

chr5:91030967-91031076

Overlap Length: 10 INS size: 338 Genotyped: No

```
left TAAGTGA--TGAATATCTTGAAGACACTGAGTTCAGAGTTCCTTATCTACCA-----GGGAACTTT
chrom TAAGTGA--TGAATATCTTGAAGACACTGAGTTCAGAGTTCCTTATCTACCA-----GGGAACTTT
right CCGCCCGCCTCGGCCTCCCAAAGTG-CTGGGATT-ACAGGCGTGAGCCACCGCGCCCGGCCGGGAACTTT
      1111111111*111111**111***111***1*1*11*1**111*1*1*1***1111111111*****
```

```
left TTTT-----TCTTTTTTTTTTTTTTTTTNNNNNNNNNNNNNNNNNNNNNNNNNNNNNNNNNNNNNNNNNNNNNNNN
chrom TAATAGTAAATCAACACCTTGTCTTTTTGCTTAGTCCAATTGTGTTGCAGC-----
right TAATAGTAAATCAACACCTTGTCTTTTTGCTTAGTCCAATTGTGTTGCAGC-----
      *22*222222*222222**2*2*****22222222222222222222222222222222222222222222
```

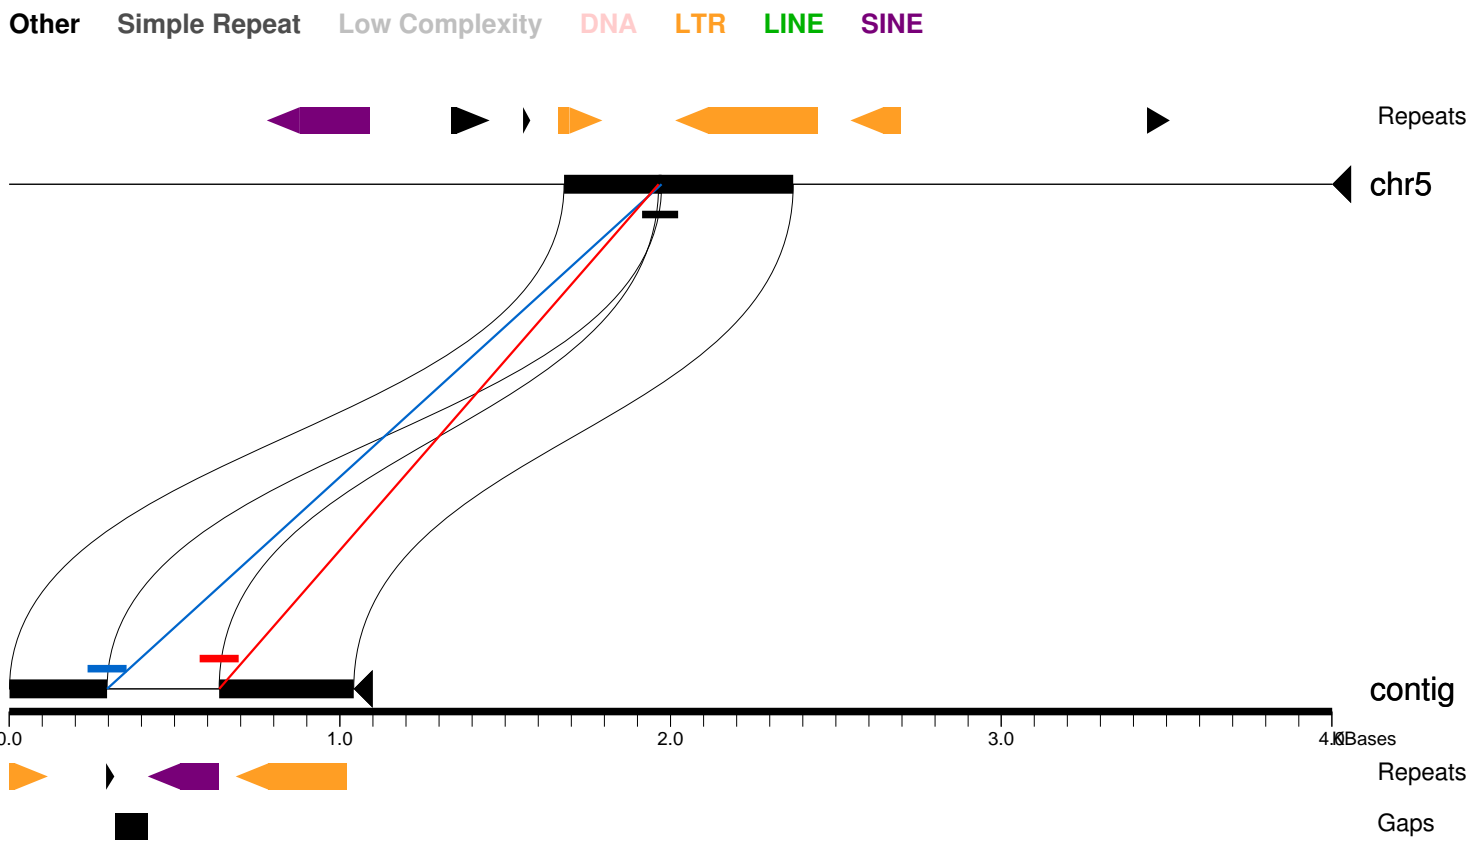

siteID: chr5\_94994224 Scaffold6 - Breakpoint: chr5:94994210  
chr5:94994161-94994269  
Overlap Length: 11 INS size: 316 Genotyped: Yes

```
left  ACTCTATCATGTAAATACTAGAAAA-TGACATTTTAATAGT-AGCCCCCTT-----CTCTTTTTTTT
chrom ACTCTATCATGTAAATACTAGAAAA-TGACATTTTAATAGT-AGCCCCCTT-----CTCTTTTTTTT
right CCGCCCGCCTCGGCCTCCCAAAGTGCTGGGATTACAGGCGTGAGCCACCGCGCCCGGCCCTCTTTTTTTT
      1*1*111*1*11111*1*1*1*1111**11***11*111**1****1**1111111111*****
```

```
left  TTTTTTTTTTTTTTTTTTTTTTGGAGACGGAGTCTCGCTCTGTCGCCAGGCTG-GAGTGCAGT-
chrom AA-----GAAAGCAGAGCAATTCAGAATATGTAAACTAGACTCTGAGTTTTGTC
right AA-----GAAAGCAGAGCAATTCAGAATATGTAAACTAGACTCTGAGTTTTGTC
      22222222222222222222222222222222***222*2**2222*2***222*2**2**22***222**2
```

Other Simple Repeat Low Complexity DNA LTR LINE SINE

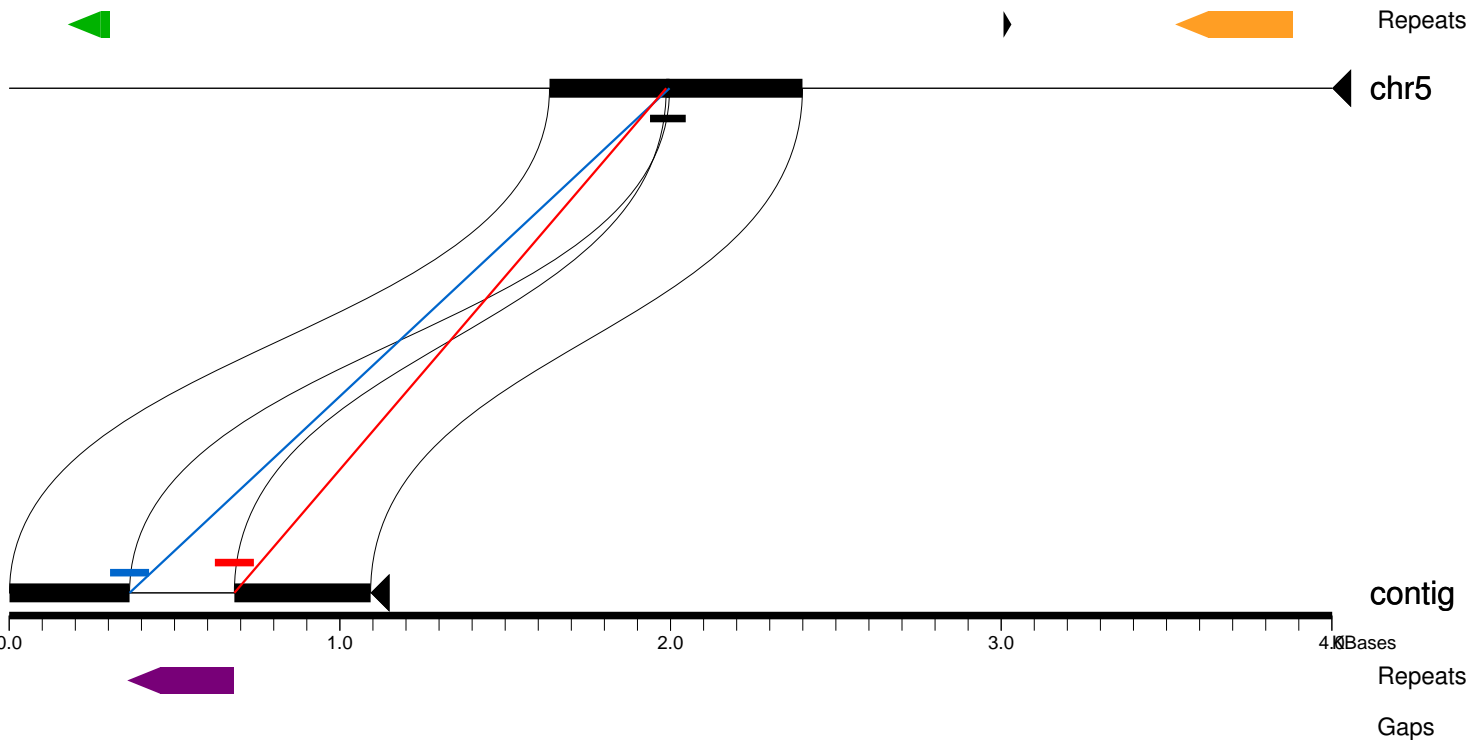

siteID: chr5\_95313714 Scaffitg2 + Breakpoint: chr5:95313726

chr5:95313680-95313785

Overlap Length: 14 INS size: 290 Genotyped: Yes

```
left  TTG---GTTTTTTTTT-----TTATGGC--TGCATG-GTATTCCACGGTGTGTATGTACCACTTTTTTC
chrom TTG---GTTTTTTTTT-----TTATGGC--TGCATG-GTATTCCACGGTGTGTATGTACCACATTTTC
right CCGCCCGCCTCAGCCTCCCAAAGTGCTGGGATTACAGGCGTGAGCCACCGCGCCCGGCCACCACATTTTC
      11*111*11*111111*11111111*11***111*1**1*1**111****1*1*11111111******2*****
```

```
left  TTTTTTTTTTTTGAGACGGAGTCTCGCTCTGTCGCCAGGCTGGAGTGCAGTGGCGGGATCTC
chrom TTTATC-----CAGTCTACCACTGATGGACATTTAGG-GTG-ATTCCATGTCTTTA
right TTTATC-----CAGTCTACCACTGATGGACATTTAGG-GTG-ATTCCATGTCTTTA
      **2*2222222222222222*****22*2***22*22**2222**2***2*2*2222*22*2*2
```

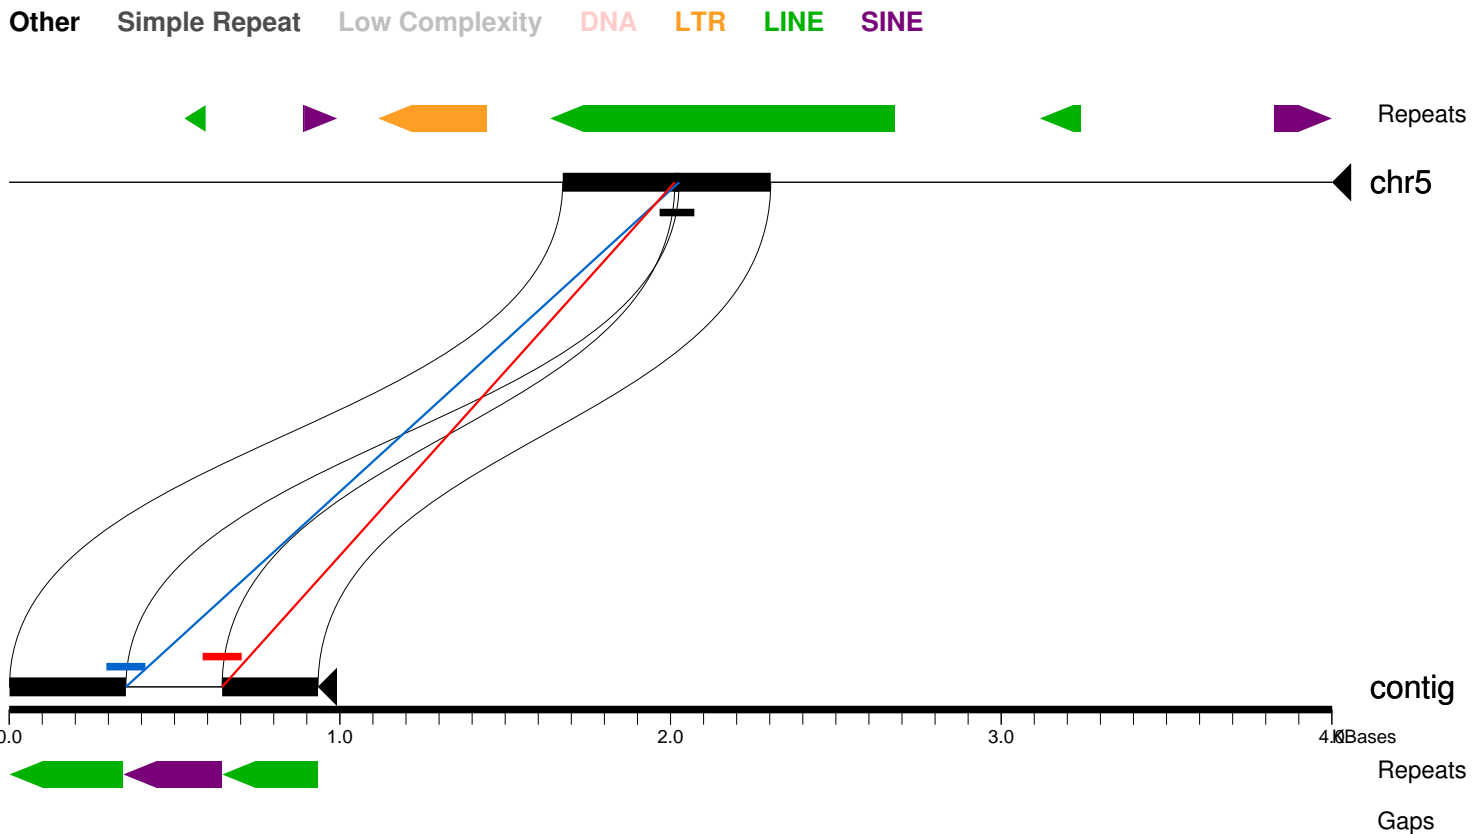

siteID: chr5\_95394228 Scaffitg1 - Breakpoint: chr5:95394257

chr5:95394097-95394426

Overlap Length: 10 INS size: 240 Genotyped: Yes

left TTT-----CTCTGGCCACACCTACTTCCTTCATTTTCCCACAGGTGTGGAAACCAAGGGTCCTCCT  
chrom TTTAATACTTTTCTCTGGCCACACCTACTTCCTTCATTTTCCCACAGGTGTGGAAACCAAGGGTCCTCCT  
right CTGA-----GGCAGGAG--AATGGCGTGAA---CCCG-----GGAGGCGGAGCTTGC----  
1\*12 1111\*\*\*111\*111\*1\*11\*1\*1\*1111\*\*\*11111111\*\*\*11\*11\*\*11\*1\*1111

left CAGTCAACTTCATGTTTTCAAATCTCCTTCAGAATCAGTTTTCCAGGGAAATGACCTAAGAAATTTGGT  
chrom CAGTCAACTTCATGTTTTCAAATCTCCTTCAGAATCAGTTTTCCAGGGAAATGACCTAAGAAATTTGGT  
right -AGTGAGC--CGAGATAGCACCCTGC----GCTCCAG----CCTGGGCGACAGAGC---GAGACTCCGT  
1\*\*\*1\*1\*11\*11\*1\*11\*\*1111\*111\*\*\*1111\*\*1\*\*\*11\*11\*\*1\*111\*\*1\*1\*11\*\*

left ACCAGAAGGGCTCTAAGAAA---GCTGATTTTGGTCAGGAGATCGAGACCATCCTGGCTA-ACACGGTGA  
chrom ACCAGAAGGGCTCTAAGAAA---GCTGATTTTGAAGTGGGAATTTGGAGCTTGGTCACTGTAGTTGGCTA  
right CTCAAAAAAAAAAAAAAAAAAAAAAGCTGATTTTGAAGTGGGAATTTGGAGCTTGGTCACTGTAGTTGGCTA  
11\*\*1\*\*11111111\*\*1\*\*\*1111\*\*\*\*\*2222\*\*22\*\*222\*\*2\*2\*22\*22\*\*22\*222\*\*22\*

left --AACCCCG-----TCTCTACTAAAAAAAAAAAAATACAAAAAATTA--GCCGGGCGTGGTGGCGGGCGCCT  
chrom GTAATAGTGGATAATCTTTATTATGAAGTAGCCATCCAATGGTTAACGCTTTCCTGGTGAACCTGGGATG  
right GTAATAGTGGATAATCTTTATTATGAAGTAGCCATCCAATGGTTAACGCTTTCCTGGTGAACCTGGGATG  
22\*\*2222\*22222\*\*\*2\*\*2\*\*22\*\*22\*22222\*2\*\*222\*\*\*22\*\*222222\*\*\*\*\*2222\*2\*222

left GTAGTCCCAGCTA-----CTCGGGAGGC-----  
chrom GGATACCCAGGAAGGGGAATGACTTGGCTGGTGCACACTTTTTCAGATTTTTTGAGA  
right GGATACCCAGGAAGGGGAATGACTTGGCTGGTGCACACTTTTTCAG-----  
\*2\*22\*\*\*\*\*22\*22222222\*\*2\*\*22\*\*222222222222

Other Simple Repeat Low Complexity DNA LTR LINE SINE

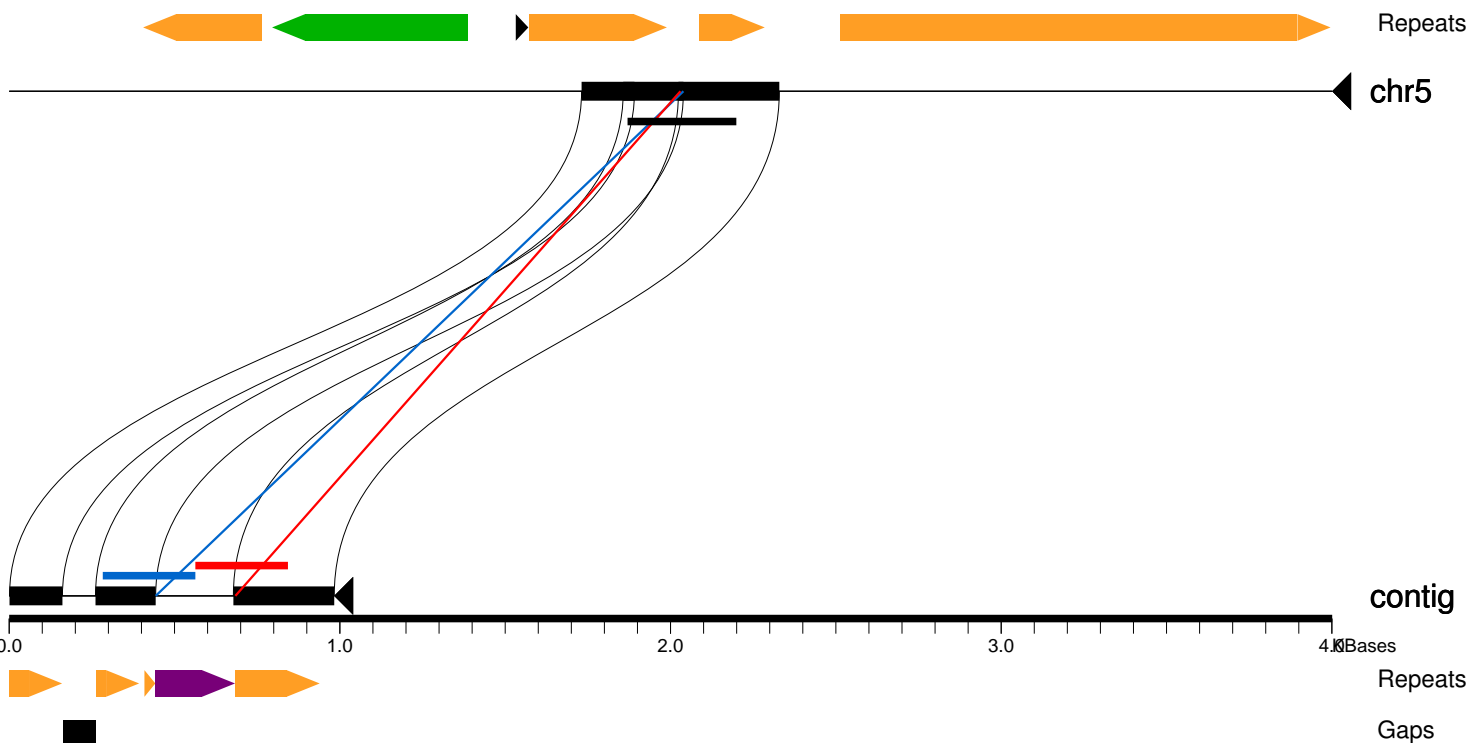

siteID: chr5\_99299921 Scafftig2 - Breakpoint: chr5:99299906

chr5:99299864-99299965

Overlap Length: 14 INS size: 430 Genotyped: No

```
left CAATCTGTGTTTCAC-TCATACACAGTTTGCTTTA--GGGCTTAGT-----GGATTTTTTTC
chrom CAATCTGTGTTTCAC-TCATACACAGTTTGCTTTA--GGGCTTAGT-----GGATTTTTTTC
right CCGCCCGCCTCGGCCTCCCAAAGTGCTGGGATTACAGGCGTGAGCCACCGCGCCCGGCCGGATTTTTTTC
      *111*1*11*111*1**11*1*11*1*1*11***11**11*1**11111111111111111111*****
```

```
left TTTTTTTTTTTTNNNNNNNNNNNNNNNNNNNNNNNNNNNNNNNNNNNNNNNNNNNNNNNNNNNNNNNNNNNNNN
chrom TTTCTTTGAAT-----ATGAGGTCATTGCTTGGAATTTCACTTAGACTTCTTTT
right TTTCTTTGAAT-----ATGAGGTCATTGCTTGGAATTTCACTTAGACTTCTTTT
      ***2***222*22222222222222222222222222222222222222222222222222222222222222
```

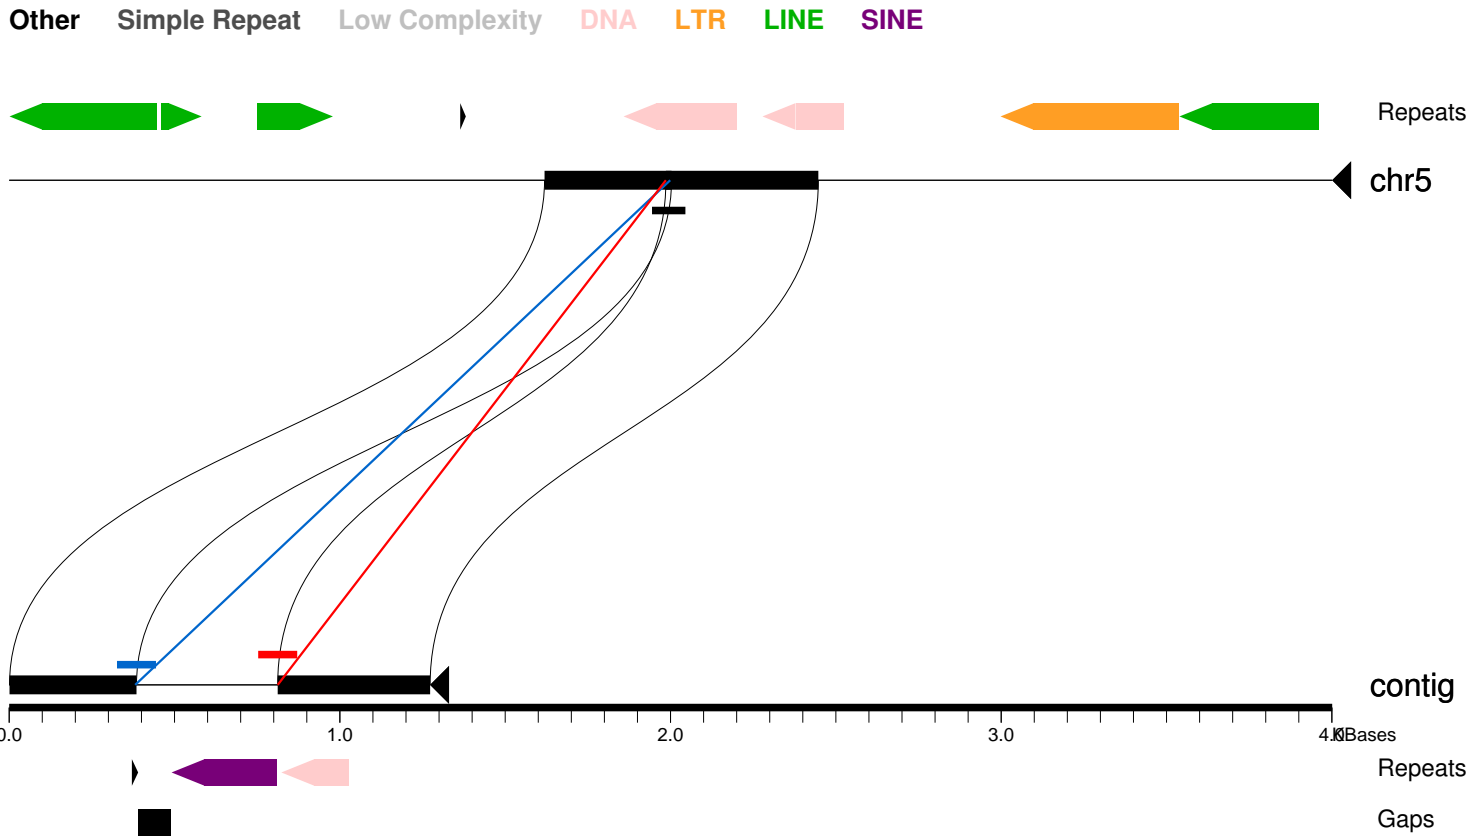











siteID: chr6\_102420453 Scafftig2 + Breakpoint: chr6:102420453

chr6:102420405-102420512

Overlap Length: 11 INS size: 456 Genotyped: No

```
left    TT-----TCTTCTATTCTGTAGGTTGTCTGTTTACTCTGTCGATAGTTTCTTT-----AATTGGGC
chrom   TT-----TCTTCTATTCTGTAGGTTGTCTGTTTACTCTGTCGATAGTTTCTTT-----AATTGGGC
right   CCGCCCGCCTCGGCCTCCCAAAGTGCTGGGATTACA--GGCGTGAGCCACCGCGCCCGGCCAATTGGGC
        111111111**11111**111*1**11*11*1***111*1**11**111*1111111111111*****
```

```
left    CTNNNNNNNNNNNNNNNNNNNNNNNNNNNNNNNNNNNNNNNNNNNNNNNNNNNNNNNNNNNNNNNNNN
chrom   CTACTTTTATTGCAATTGCTTTTGGGGACTTGGCCAAAATTATTTGCCAAG-----
right   CTACTTTTATTGCAATTGCTTTTGGGGACTTGGCCAAAATTATTTGCCAAG-----
        **22222222222222222222222222222222222222222222222222222222222222222222
```

Other    Simple Repeat    Low Complexity    DNA    LTR    LINE    SINE

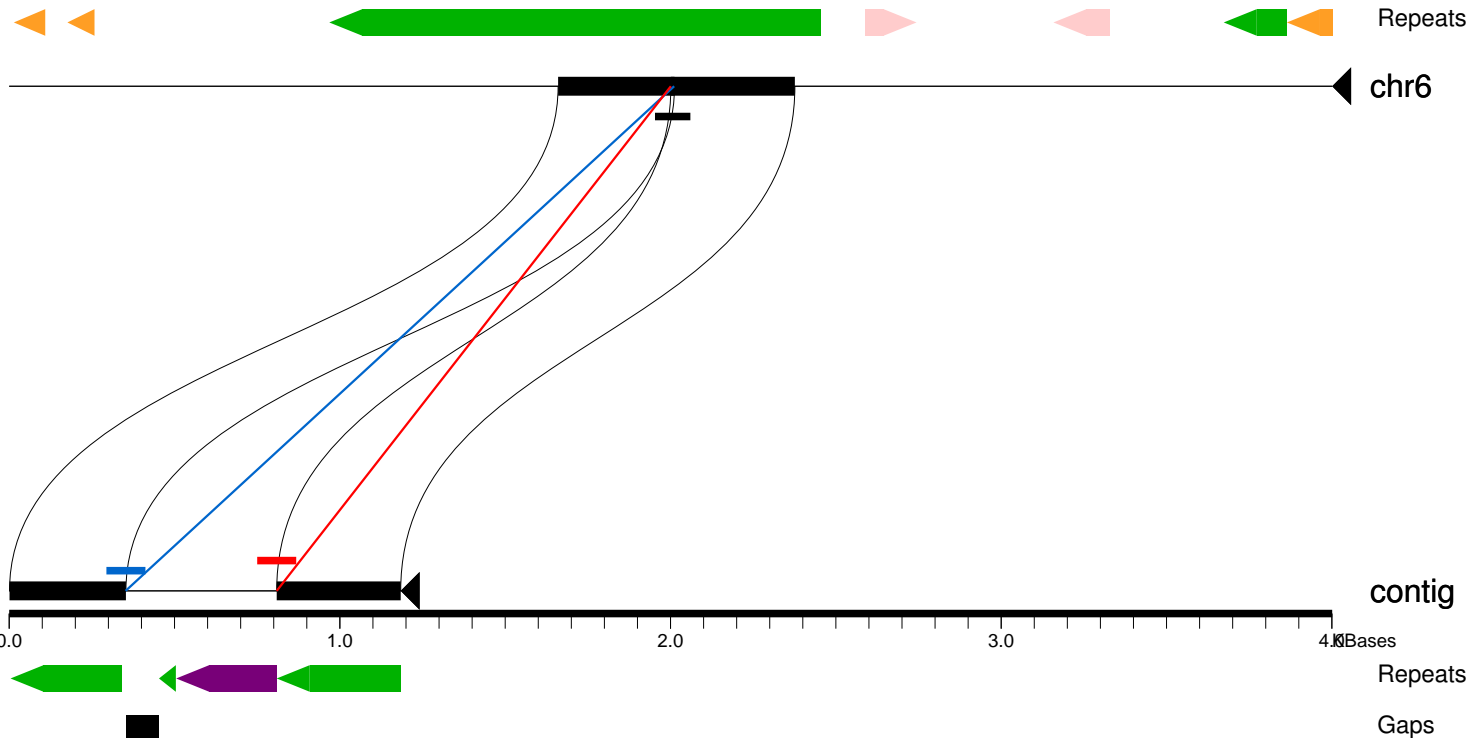







siteID: chr6\_104772669 Scaffitg8 + Breakpoint: chr6:104772658

chr6:104772498-104772829

Overlap Length: 12 INS size: 303 Genotyped: Yes

```
left -----AACACATACAGCAACCCAACCTGTGCAGGCTGGAAAAACAGCAGTG--TCACAGTAGACACT
chrom CTGTCAGCTGCAACACATACAGCAACCCAACCTGTGCAGGCTGGAAAAACAGCAGTG--TCACAGTAGACACT
right C----AGGAGAAATGGCGTG----AACCCGGGAGGCGGAGCTTGCAGTGAGCCGAGATCCC----GCCACT
2     22NN2N*111*1*11111*****1111*11111***1*1*111***1*1*1***1*1111*1****
```

```
left GCAGTGAGAGGCAGCCAGTAGAGCACACTGCACCAGACCAGCGGCTCTCAGCAGGTCTCTGAGTAGCAT
chrom GCAGTGAGAGGCAGCCAGTAGAGCACACTGCACCAGACCAGCGGCTCTCAGCAGGTCTCTGAGTAGCAT
right GCACTC-----CAGCCTGGGCGA-----CAGAGC-GAGACTCC-----GTCTCAAAAAAAAAAAAA
***1*1111111*****11*11**111111111111*****1*1*1*1***1111111*****11*11*11*1
```

```
left GGAATATCATCCTACGCCAATGAAAGATCATGGGCGG-GGCGCGGTGGCTCACGCC-----TGTAATCC
chrom GGAATATCATCCTACGCCAATGAAAGATCATGGACATTTGGCTTTGTGGTTGTAGTGAGGGGGATGCCATAC
right AAAAAAAAA-----AAAAGAAAGATCATGGACATTTGGCTTTGTGGTTGTAGTGAGGGGGATGCCATAC
11**1*11*1111111111**1**********2*222***222***2*222*22222222**22**2*
```

```
left CAG-----CACTTT-----GGGAGGCCGAGGCGGGCGGATCAC-----GAGGTCAGG
chrom TAGGAGGCAGATAACAGTTTATGCGACAAGGAAAGCAGTGAGAACCGCATGATTTTTCAGTGATGCCAGC
right TAGGAGGCAGATAACAGTTTATGCGACAAGGAAAGCAGTGAGAACCGCATGATTTTTCAGTGATGCCAGC
2**2222222222**2***2222222222**2*2*2*2*22222**2*2*22222222**2*2***2
```

```
left A-GATCGA--GACCAT---CCCGGCTAAAAACGG-TGAAACCCCGTCTCTACTAAA
chrom ACGGAGGACTGGCCATGCTCCTGGCCCAAATATATGAATGTCCATGTCAG--AGA
right ACGGAGGACTGGCCATGCTCCTGGCCCAAATATATGAATGTCCAT-----
*2*222**22*2***222**2***22***2222***222**2*N11NN221N1
```

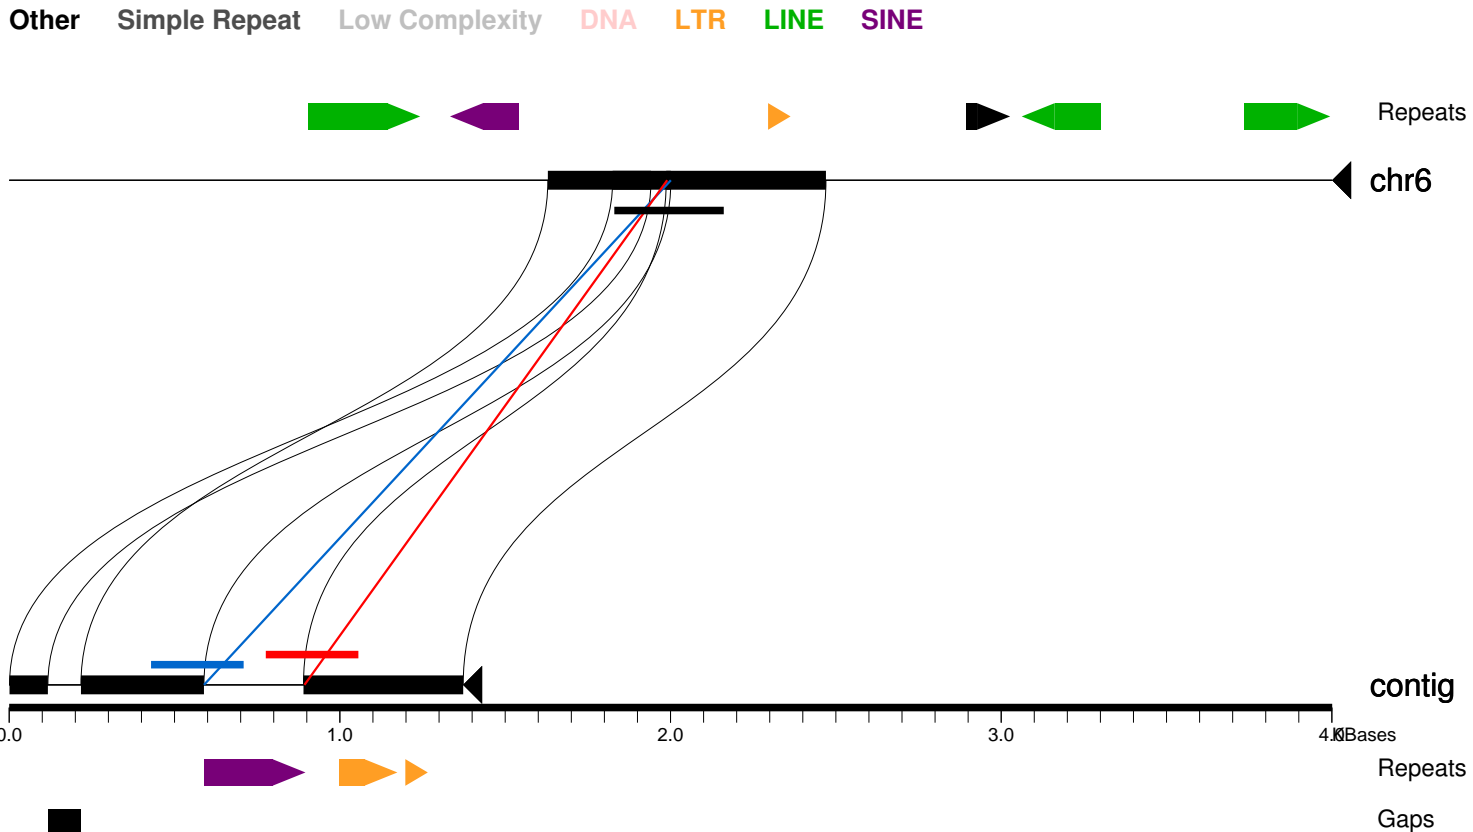







siteID: chr6\_110450796 Scafftig1 - Breakpoint: chr6:110450802

chr6:110450751-110450861

Overlap Length: 9 INS size: 429 Genotyped: No

```

left    AAGAAACTCTTGGAGCTACTTCATGACAGTGGGAAGCACAAAAGATAAAATG-----TTGGAAGCTGG
chrom   AAGAAACTCTTGGAGCTACTTCATGACAGTGGGAAGCACAAAAGATAAAACG-----TTGGAAGCTAA
right   NNNNNNNNNNNNNNNNNNNNNNNNNNNNNNNNNNNNNNNNNNNNNNNNNNNNNNNNNNNNNNNNNNNNNNNNN
        111111111111111111111111111111111111111111111111111111111111111111N1111111111
        *****22

```

```

left    CCGGGCGCGGTGGCTCACGCCTGTAAATCCCAGCACTTTGGGAGGCCGAGGC---GGGTGG
chrom   TCCTAATTTAAAAGAAAGGAGTGTGA-----CAATTTG-----CCAAGGCACAGAAAAG
right   TCCTAATTTAAAAGAAAGGAGTGTGA-----CAATTTG-----CCAAGGCACAGAAAAG
        2*22222222222222*2*22***2*222222**2***22222**2***222*2222*

```

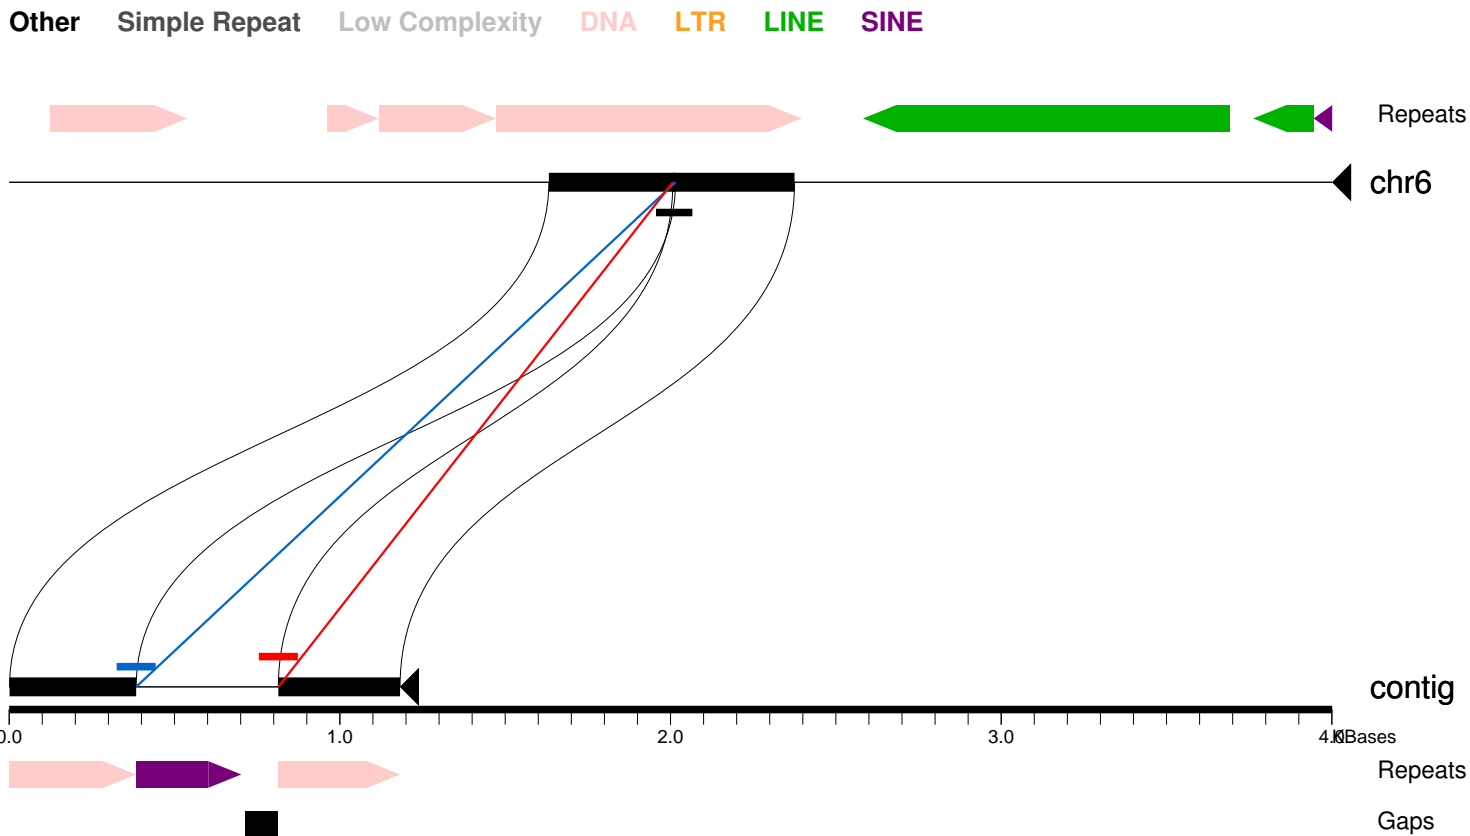

siteID: chr6\_110626735 Scafftig6 - Breakpoint: chr6:110626741

chr6:110626695-110626800

Overlap Length: 14 INS size: 298 Genotyped: Yes

```
left  ACAATTCCATCAAATATTGGGCAAAGGAT-----ATGAACAGACACTTTTCAAAAGAAGAC
chrom ACAATTCCATCAAATATTGGGCAAAGGAT-----ATGAACAGACGCTTTTCAAAAGAAGAC
right CCACTGCACTCCAGCCT-GGGCAACAGAGCGAGACTCCGTCTCAAAAAAAAAAAAAAAAAAAAAAAA
1**1*1*11**1*111*1*****11**1111111111111111*11**1*1*1N1111111******
```

```
left  ATTTGGCCGGGCGCGGTGGCTCACGCCTGTAATCCCAGCACTTTGGGAGGCCGAGGCGGGTGG
chrom ATTTATGTGGCCAACAAA---CATGAAAAAAAAATCTCATCA---TCACTGGTCA-----TCA
right ATTTATGTGGCCAACAAA---CATGAAAAAAAAATCTCATCA---TCACTGGTCA-----TCA
***2222**2*222222222**2*22222**2**2**222*2222**2*22222222*22
```

Other Simple Repeat Low Complexity DNA LTR LINE SINE

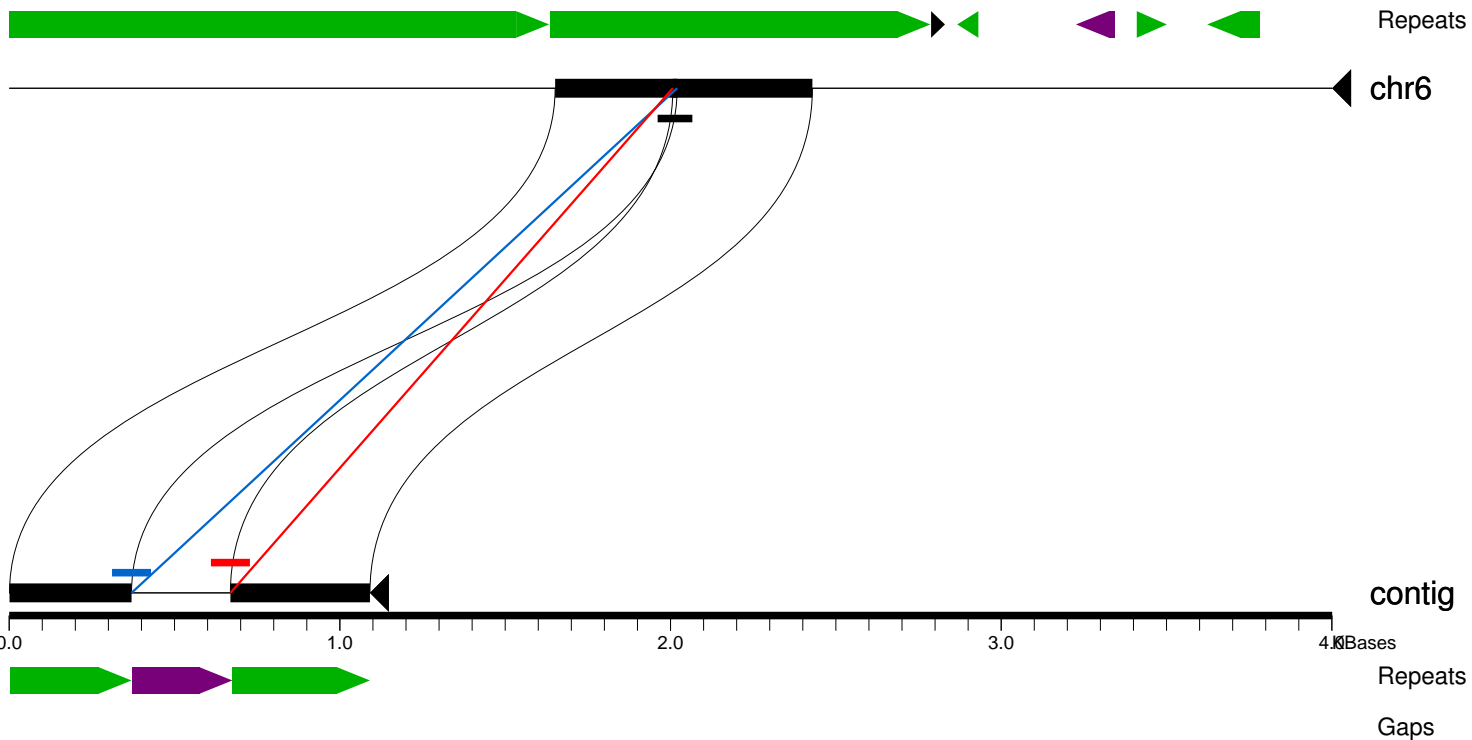

siteID: chr6\_114548387 Scafftig2 - Breakpoint: chr6:114548398

chr6:114548352-114548457

Overlap Length: 14 INS size: 300 Genotyped: Yes

```
left  CTCTACATGTAAAACTA-----ATAGCTAATATGTG-CT-----AATTGGCACTATTAAGATATACTT
chrom CTCTACATGTAAAACTA-----ATAGCTAATATGTG-CT-----AATTGGCACTATTAAAGATATACTT
right CACTGCACTCCAGCCTGGGCGACAGAGCGAGACTCCGTCTCAAAAAAAAAAAAAAAAAAAAAAAAGATATACTT
      *1**1**1111*11**1111111*1***1*111*11*1**111111**11111*11*11*****
```

```
left  CTGGCCGGGCGCGGTGGCTCACGCCGTGTAATCCCAGCACTTTGGGAGGCCGAGGCGGGCGG
chrom CTTTTGGATGAAAGGT-----TTATTGTTGCCTTTTGATACGTT-ATGGATAAAA
right CTTTGGATGAAAGGT-----TTATTGTTGCCTTTTGATACGTT-ATGGATAAAA
      **222222*222***222222222222*2**2222*22***22*2*222*2*222222
```

Other Simple Repeat Low Complexity DNA LTR LINE SINE

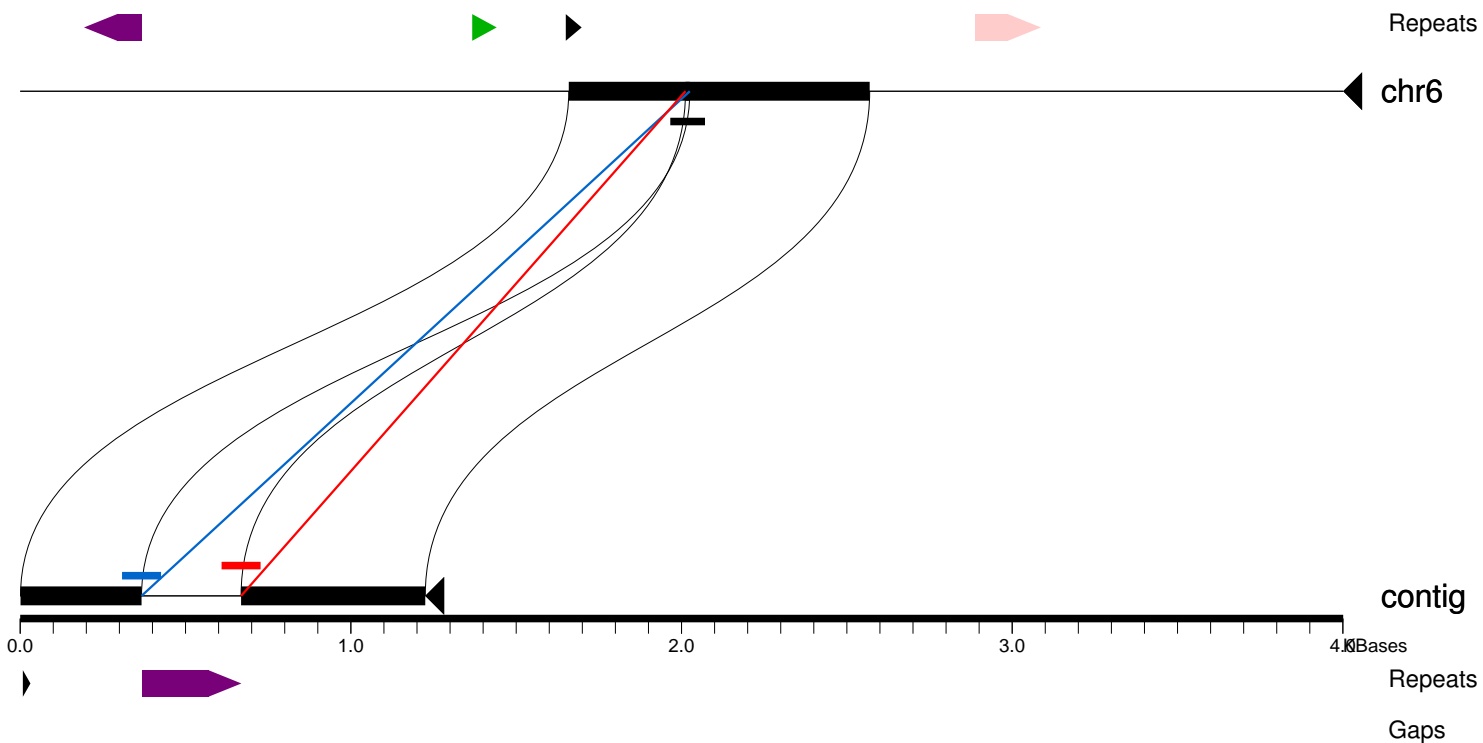

siteID: chr6\_115788651 Scaffitg1 - Breakpoint: chr6:115788630

chr6:115788598-115788686

Overlap Length: 17 INS size: 492 Genotyped: No

```
left      T-----CTTGG-----AAAGA-CT----TTCTAGTTATTGAGA-----GGACTTGGGTG
chrom     T-----CTTGG-----AAAGA-CT----TTCTAGTTATTGAGA-----GGACTTGGGTG
right    TGATCCGCCCCGCTCGGCCTCCCAAAGTGCTGGGATTACAGGCGTGAGCCACCGCGCCCCGGCCTTGGGTG
          *111111111111**1**111111****11**1111**11**111*11*11*11111111**1*****
```

```
left      TTGTTTTCTTTTTTTTTTTTTNNNNNNNNNNNNNNNNNNNNNNNNNNNNNNNNNNNNNNNNNNNNNNNNNNNNNNNNNNNNNN
chrom     TTGTTTTCTAAGCTGTTTTTGTGTTAGGGGGCACCTCAAGCCCAGTAAT-----
right    TTGTTTTCTAAGCTGTTTTTGTGTTAGGGGGCACCTCAAGCCCAGTAAT-----
          *****2222*2*****2222222222222222222222222222222222222222222222222222222
```

```
left      NNNNNNNNNN
chrom     -----
right    -----
          2222222222
```

Other Simple Repeat Low Complexity DNA LTR LINE SINE

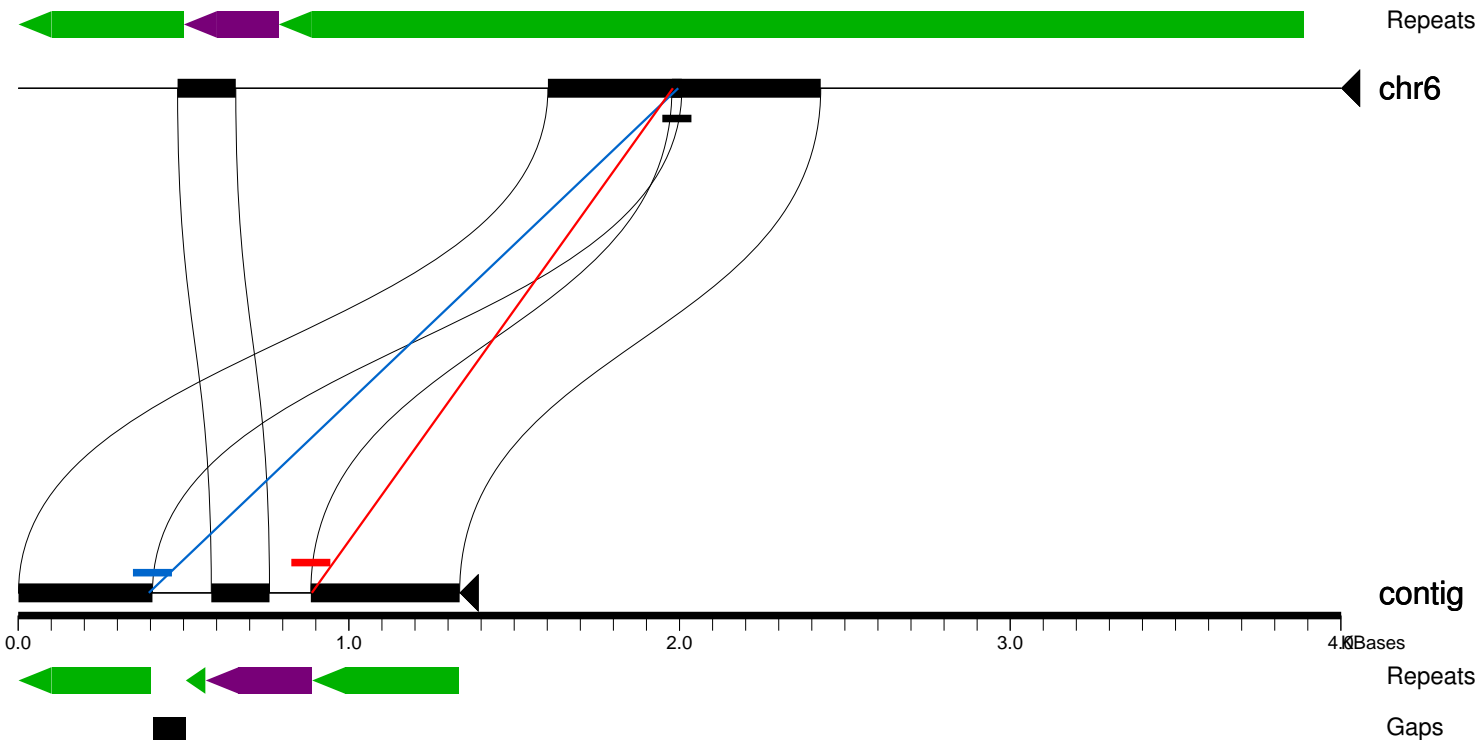

siteID: chr6\_116307105 Scafftig9 - Breakpoint: chr6:116307081

chr6:116307037-116307140

Overlap Length: 16 INS size: 279 Genotyped: Yes

```
left  AGT-----ATCAATACTTTCTCCCAACAAGCAGCAAAATCATTATGATT-----AGAATGCTGAG
chrom AGT-----ATCAATACTTTCTCCCAACAAGCAGCAAAATCATTATGATT-----AGAATGCTGAG
right CCTGGGCGACAGAGTGAGACTCCGTCTCAAAAAAAAAAAAAAAAAAAAAAAAAAAAAAAAAAAGAATGCTGAG
      11*1111111111*111*1***111**1***1**11*11****11*11*11*1111111111*****
left  TGCTTGCACTTTGGGAGGCCGAGGCGGGCGGATCACGAGGTCAGGAGATCGAGACCATCCCGGC
chrom TGCTTATATTATA-----CATAT-----ATTTTATAGT--AGACAACCTTTTCAATACAGTG
right TGCTTATATTATA-----CATAT-----ATTTTATAGT--AGACAACCTTTTCAATACAGTG
      ***22*2*2*222222*22*222222222**222222**222**2*2*2222*2**2*2*22
```

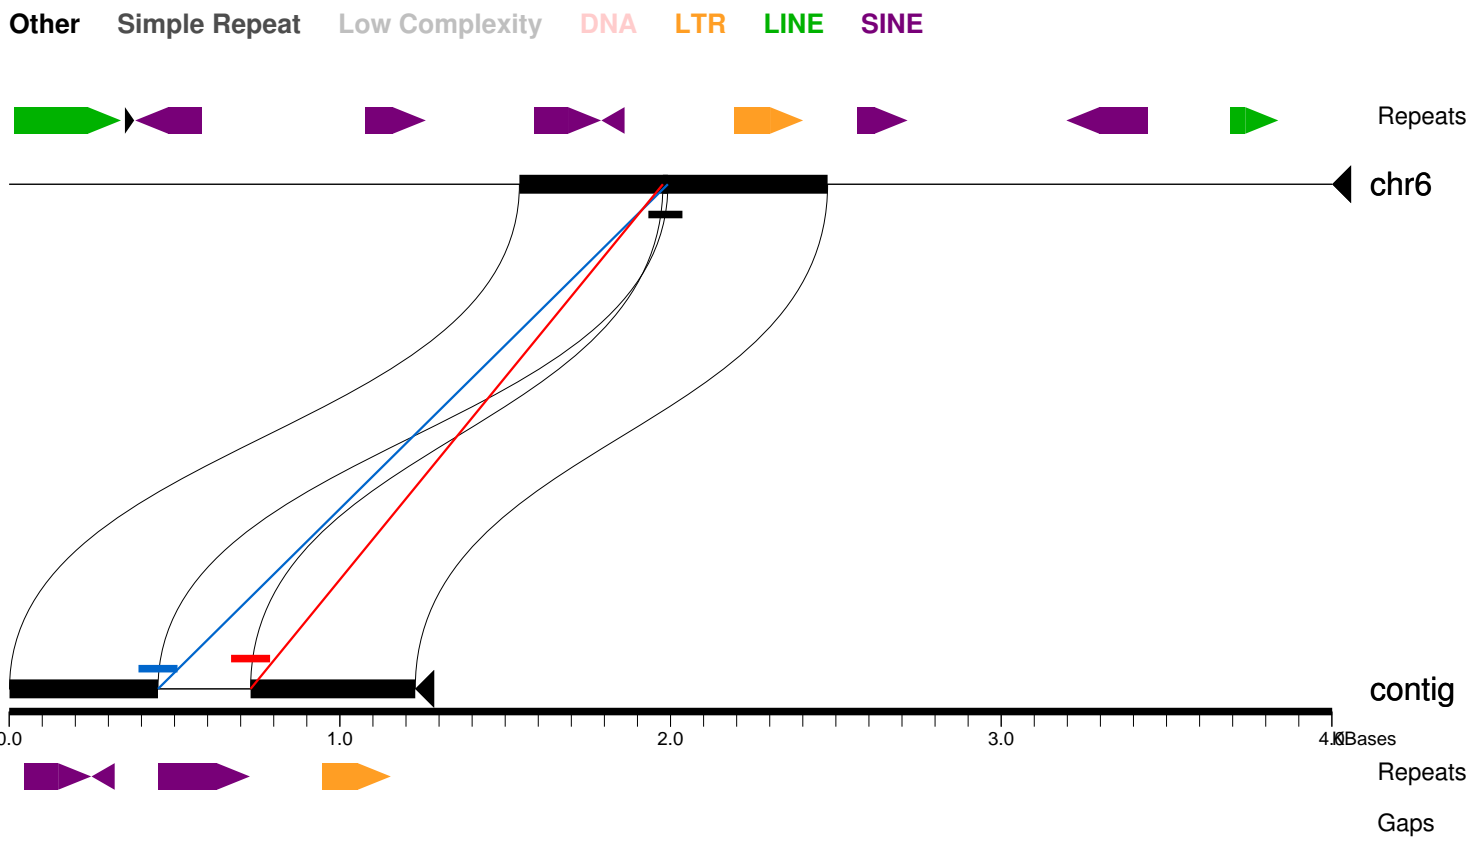



siteID: chr6\_118626169 Scafftig10 + Breakpoint: chr6:118626149

chr6:118626103-118626208

Overlap Length: 14 INS size: 276 Genotyped: Yes

```
left  ACTTCTAAAAC---TTACACAGAGA-----GAAATTGTTAC---AAGTTTACATCACAGTCAAAGATC
chrom ACTTCTAAAAC---TTACACAGAGA-----GAAATTGTTAC---AAGTTTACATCACAGTCAAAGATC
right TGGTCTCGATCTCCTGACCTCGTGATCCGCCCGCCTCGGCCTCCCAAAGTGCTGGGATTAGTCAAAGATC
      111***11*1*111*1**111*1**1111111*11111*111*111****111111111******
```

```
left  TTTTFFFFFFFFFFFFFFFF--TTCTTTGAGACGGAGTCTCGCTCTGTGCGCCAGGCTGGAGTGCA
chrom TTTAGTGTACAGATTGTCATTATATTAG-CAGAGAA-----ACAGAATCAACAG--
right TTTAGTGTACAGATTGTCATTATATTAG-CAGAGAA-----ACAGAATCAACAG--
      **22*2*222222**2*22**2*2*2**2*2**22222222222222222222***22*22*22*22
```

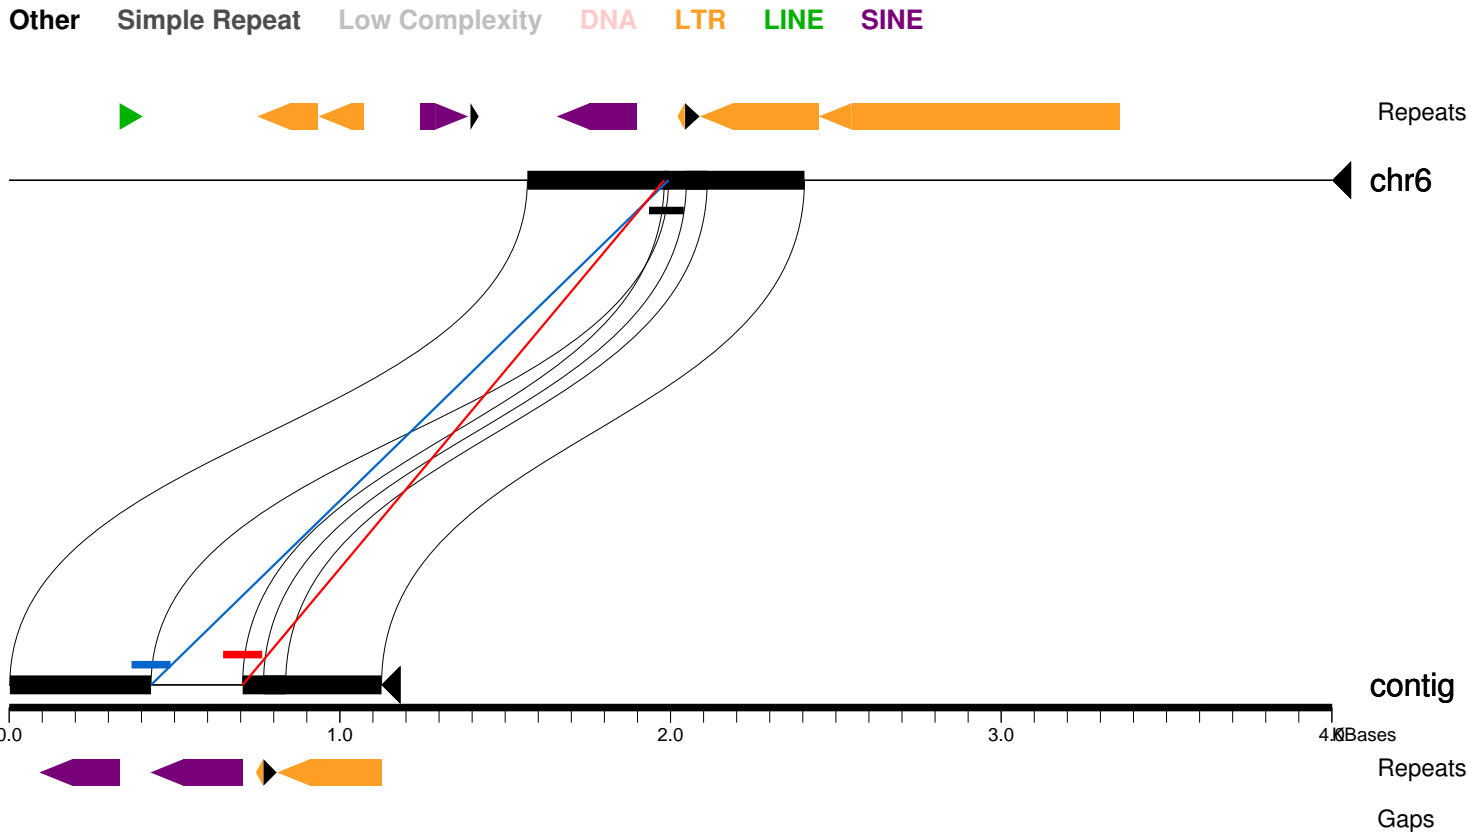

siteID: chr6\_120380251 Scaffitig5 + Breakpoint: chr6:120380254

chr6:120380207-120380313

Overlap Length: 7 INS size: 306 Genotyped: Yes

```
left TAGTGATTGA-GTTCTCATGAAAT-CT--GAT----GGTGTATATAAAACAGTTTT----CCCTGCTTTTT
chrom TAGTGAGTGA-GTTCTCATGAAAT-CT--GAT----GGTGTATATAAAACAGTTTT----CCCTGCTCTTG
right CCGCCCGCCTCGGCCTCCCAAAGTGCTGGGATTACAGGCGTGAGCCACCGCGCCCGGCCCCCTGCTCTTG
11*11121111*11***111*1*1**11***1111*1*1*111*1*1111111111******2**2
```

```
left TTTTTTTTTTTTTTTTTTTTTT--TGAGACGGA-GTCTCGCTCTGTCGCCAGGCTGGAGTGCAGT
chrom TTAGCTCTCTTTCCTGCCACCATGTGAAGAAAGTCTT----TGCTTCCC-----CTTT
right TTAGCTCTCTTTCCTGCCACCATGTGAAGAAAGTCTT----TGCTTCCC-----CTTT
**222*2*2***22*2222222**2**2*2*2***22222**222***2222222222*22*
```

Other Simple Repeat Low Complexity DNA LTR LINE SINE

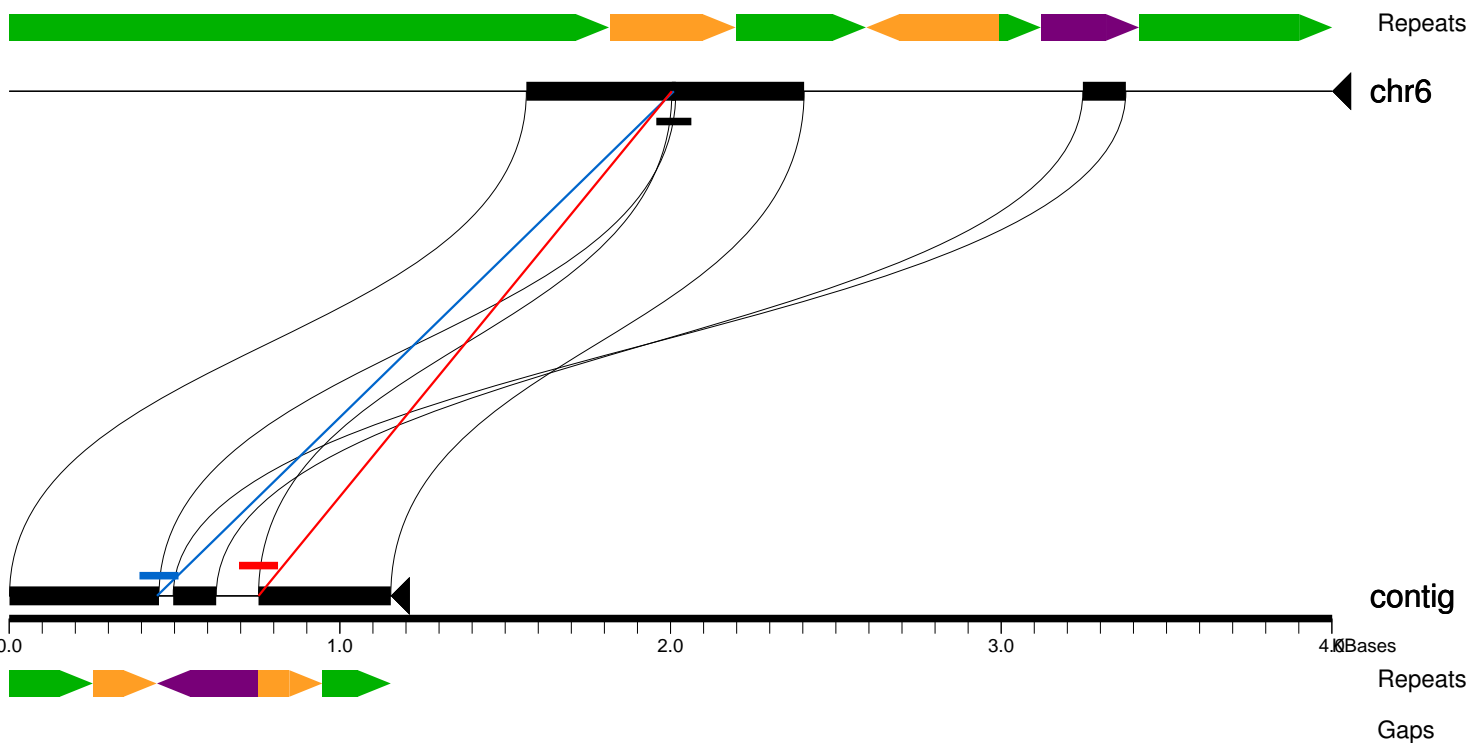





siteID: chr6\_120894466 Scaffitg1 + Breakpoint: chr6:120894460

chr6:120894415-120894519

Overlap Length: 15 INS size: 190 Genotyped: Yes

```
left CAATAA-----TTTCAATCATAGAGTTGGTGGTTATAGTAGCAGAACTAC-----AAAAAGGGCTA
chrom CAATAA-----TTTCAATCATAGAGTTGGTGGTTATAGTAGCAGAACTAC-----A AAAAGGGCTA
right GAGCGAGACTCCGTCTCAAAAAAAAAAAAAAAAAAAAAAAAAAAAAAAAAAAAAAAAAAAAAAAAAAAAAA AAAAAAGGGCTA
1*111*1111111*1****11*1*1*1111111111*1*11*11*1**11*11111111*1*****
```

```
left AATTTAGCCGGGCGTAGTGGCGGGCGCCTGTAGTCCCAGCTACTTGGGAGGCTGAGGCAGGAG--
chrom AATTTCA--CAGCCTCAG-----CAAGTCTTCCATGCAAA-----AGTCACAGGGAATAAGT
right AATTTCA--CAGCCTCAG-----CAAGTCTTCCATGCAAA-----AGTCACAGGGAATAAGT
***2*22*2*2*22**222222222*22**22**22**2*222222**2*22**2*22*222
```

Other Simple Repeat Low Complexity DNA LTR LINE SINE

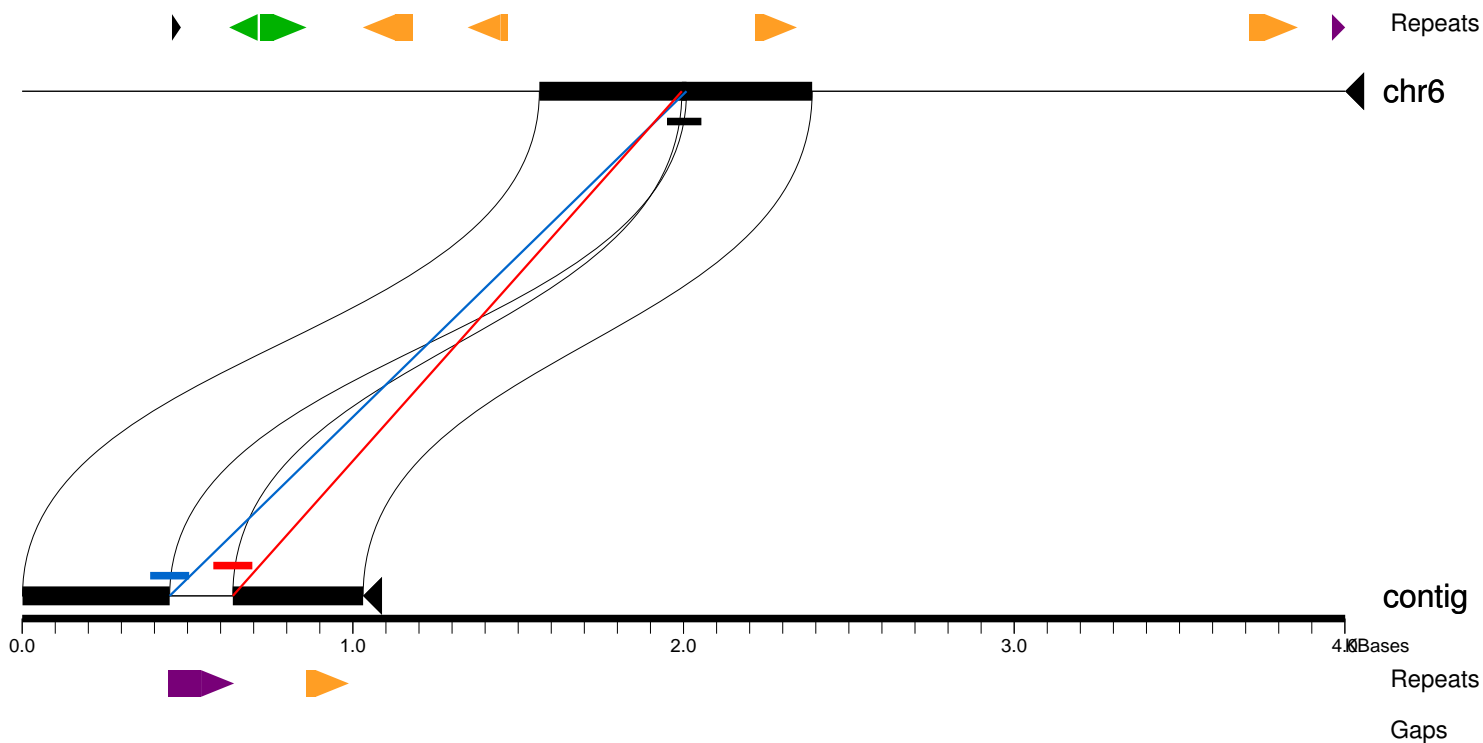

siteID: chr6\_12102154 Scaffitig1 - Breakpoint: chr6:12102168

chr6:12102124-12102218

Overlap Length: 16 INS size: 297 Genotyped: Yes

```
left  AAG-----TGAAA-----GGATAGGA-AAAGATGTATCATGCAAAT--ACAAGCATAA
chrom AAG-----TGAAA-----GGATAGGA-AAAGATGTATCATGCAAAT--ACAAGCATAA
right GAGATTGCGCCACTGCAGTCCGCAGTCCGGCCTGGGCGACAGAGCGAGACTCCGTCTCAAAAAAAAAAA
1**111111111111**1*11111111111111*11*1**11*1***111*111*1*111*11**1**11*1**
```

```
left  GAAAGCTGGAGTGGGCCGGGCGCGGTGGCTCACGCCTGTAATCCCAGCACTTTGGGAGGCCGAGGCGGGT
chrom GAAAGCTGGAGTGG-----CTATGT-----TAATATCAAAA----GGGACTTCAAAAATAAA-
right GAAAGCTGGAGTGG-----CTATGT-----TAATATCAAAA----GGGACTTCAAAAATAAA-
*****22222222*22**222222222222*****22**22*2222*****222*2*2222222
```

```
left  GGA
chrom -AA
right -AA
22*
```

Other Simple Repeat Low Complexity DNA LTR LINE SINE

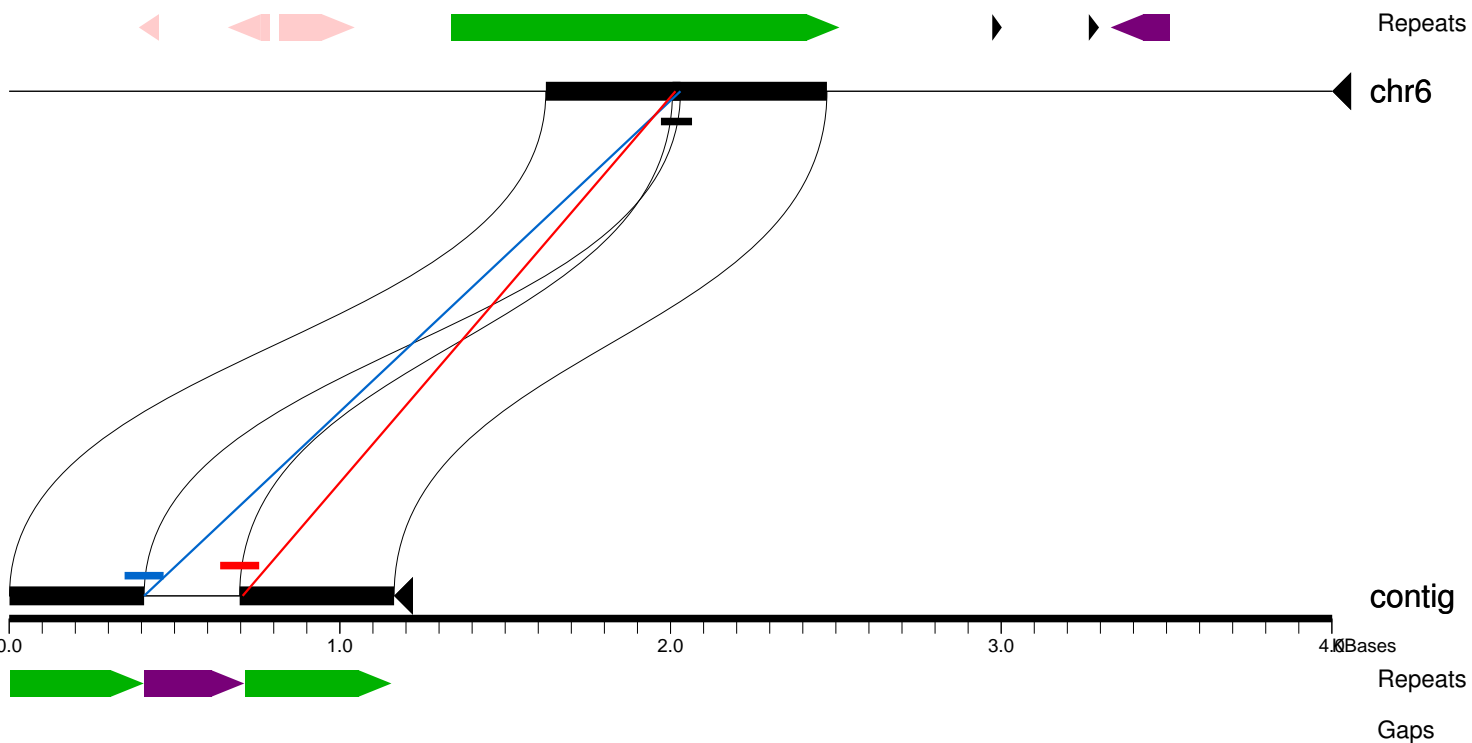









siteID: chr6\_126509029 Scaffitig5 - Breakpoint: chr6:126509035

chr6:126508990-126509094

Overlap Length: 15 INS size: 306 Genotyped: Yes

```
left  AGC-ACCCAG----TCAGTGGGAAATTCATT-----AGAGGAAAGGAATCTTTTAAAGAAATGGCA
chrom AGC-ACCCAG----TCAGTGGGAAATTCATT-----AGAGGAAAGGAATCTTTTAAAGAAATGGCA
right CTCCAGCCTGGGCGACAGAGCGAGACTCCGTCTCAAAAAAAAAAAAAAAAAAAAAAAAAAAAAAAGAAATGGCA
      11*1*1*1*11111***1*1*1*1*1*11*111111111*1*11***11*1111111******
```

  

```
left  ATGGGGCCGGGCGGGTGGCTCACGCCTGTAATCCCAGCACTTTGGGAGGCCGAGGCGGGCGG
chrom ATGGAACA-----ATTCACTATTCTTTT----GGAAAAGGTGACCCTTAGCTCCCTAC
right ATGGAACA-----ATTCACTATTCTTTT----GGAAAAGGTGACCCTTAGCTCCCTAC
      ***22*2222222222222222***222*2*22*2222*2*222*2**22*22**22222222
```

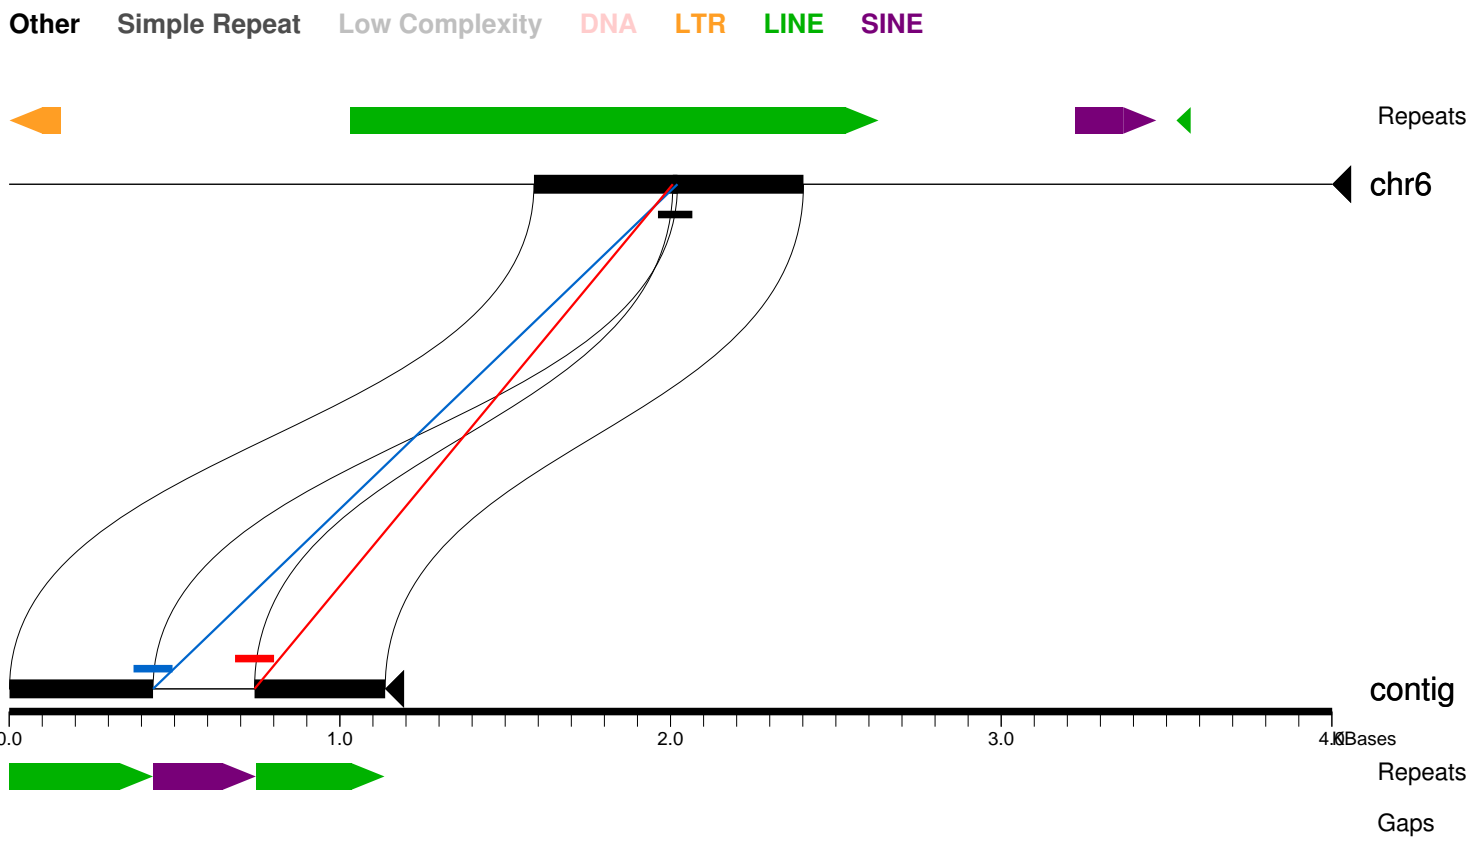





siteID: chr6\_129746036 Scafftig1 - Breakpoint: chr6:129746037

chr6:129745994-129746096

Overlap Length: 17 INS size: 309 Genotyped: Yes

```
left  ---TCTGTG-----TATTTA-----CTCCAAGATAAATGATGGCATATGTTTACCCAAAAAATTTGTA
chrom ---TCTGTG-----TATTTA-----CTCCAAGATAAATGATGGCATATGTTTACCCAAAAAATTTGTA
right CAGCCTGGGCGACAGAGCGAGACTCCGTCTCAAAAAAAAAAAAAAAAAAAAAAAAAAAAAAAAAAAAAAATAAAAAATTTGTA
      1111***1*111111*111*11111111***1**1*1***11*1111*1*11111*111*****

left  CACAGAGGCCGGGCGCGGTGGCTCACGCCTGTAATCCCAGCACTTTGGGAGGCCGAGGCGGGCGG
chrom CACAGATGT-----GTACAT-ATCCCTATGATGAAATAATTA-----CCAATAAAAAGGA
right CACAGATGT-----GTACAT-ATCCCTATGATGAAATAATTA-----CCAATAAAAAGGA
      *****2*22222222**222*2*22***2*2**222*22*2*22222222**2*2222222*2
```

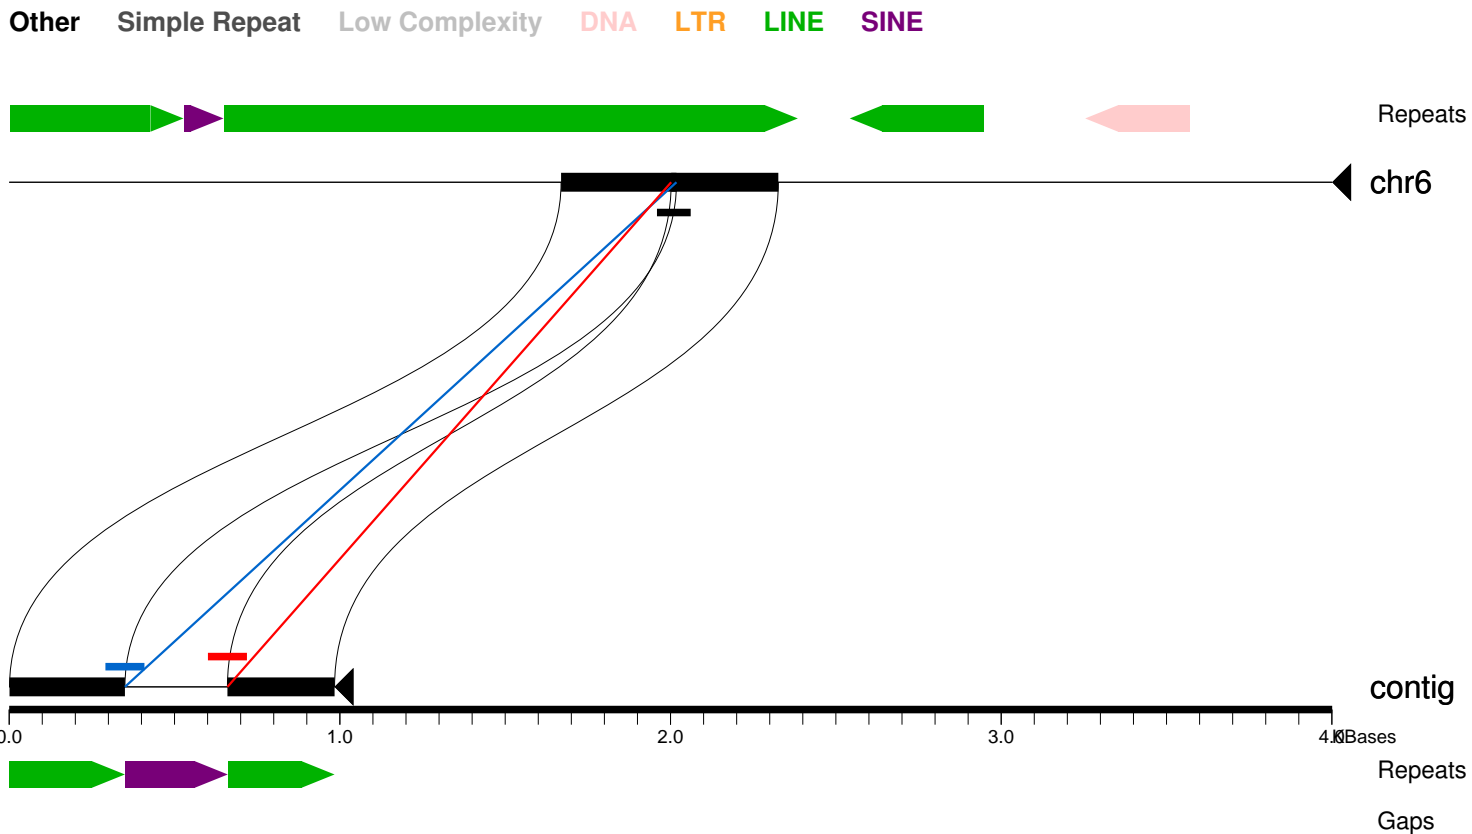

siteID: chr6\_129895112 Scafftig6 - Breakpoint: chr6:129895097

chr6:129895050-129895156

Overlap Length: 13 INS size: 292 Genotyped: Yes

```
left      ----GCCATATGCAGA--AAACTG--AAACTG-----GACGCCTACCTTACACCTTATACAAAAAATTAAC
chrom     ----GCCATATGCAGA--AAACTG--AAACTG-----GACGCCTACCTTACACCTTATACAAAAAATTAAC
right    TCCCGCCAC-TGCACTCCAGCCTGGGCAACAGAGCGAGACTCCGTCTCAAAAAAAAAAAAAAATAAAATTAAC
          1111****11****1111*11***111***1*11111***1**11*111*1*1111*1*1*****
left     TCGGCCGGGCGCGGTGGCTCAC-GCCTGTAATCCCAGCACTTTGGGAGGCCGAGGCGGGCGGA-
chrom    TCGA-----TGGATTAAAGACTTAAATATAAGATCTA----AAACCATAAAAACTGTAG
right   TCGA-----TGGATTAAAGACTTAAATATAAGATCTA----AAACCATAAAAACTGTAG
          **222222222222***2*2*22*2**22***222**22**22222*22**22222222*2*2
```

Other Simple Repeat Low Complexity DNA LTR LINE SINE

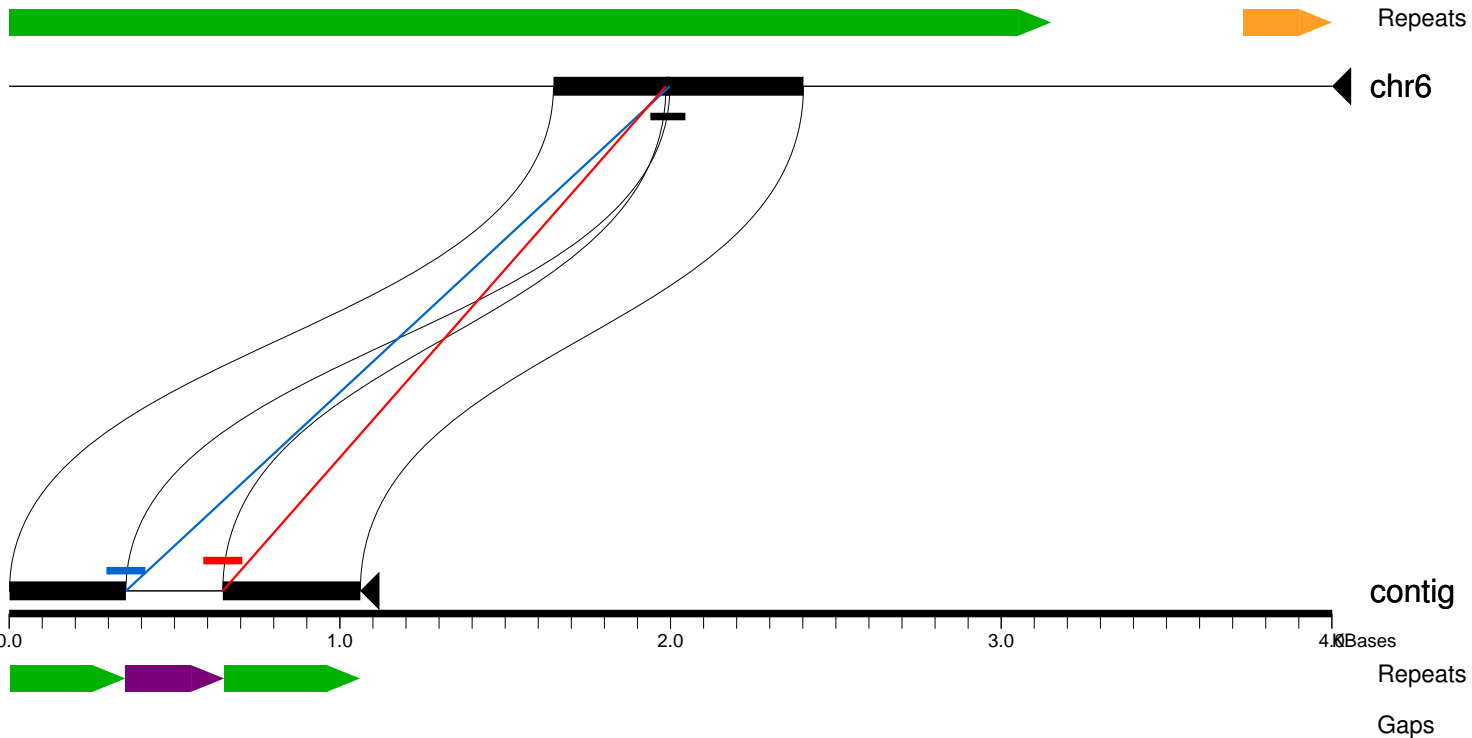

siteID: chr6\_130614796 Scaffitg10 - Breakpoint: chr6:130614789

chr6:130614739-130614843

Overlap Length: 10 INS size: 270 Genotyped: Yes

```
left  A-----AGAATAGCC----CCAGTGATGCTTCCACAGTTTCCATAAACATTTTTAAAAA--CCAGTC
chrom A-----AGAATAGCC----CCAGTGATGCTTCCACAGTTTCCATAAACATTTTTAAAAA--CAGTC
right GCAGTCCGCAGTCCGGCCTGGGCGACAGAGCGAGACTCCGTCTCAAAAAAAAAAAAAAAAAAAAAAACCAGTC
      1111111111**1111***1111*1*11**1111111*1*1**1**1*1***1*11111*****11*****
```

```
left  CTGATTGGGAGGCCGAGGCGGGTGGATCATGAGGTCAGGAGATCGAGACCATCCTGGCTAACA
chrom CTGAA----AGATGTAGGATAATATTTGATGTTGACATATGATTAATTCAATG-----
right CTGAA----AGATGTAGGATAATATTTGATGTTGACATATGATTAATTCAATG-----
      ***22222**2222***2222*222*2***22*2**222***22*22*2**22222222222
```

Other Simple Repeat Low Complexity DNA LTR LINE SINE

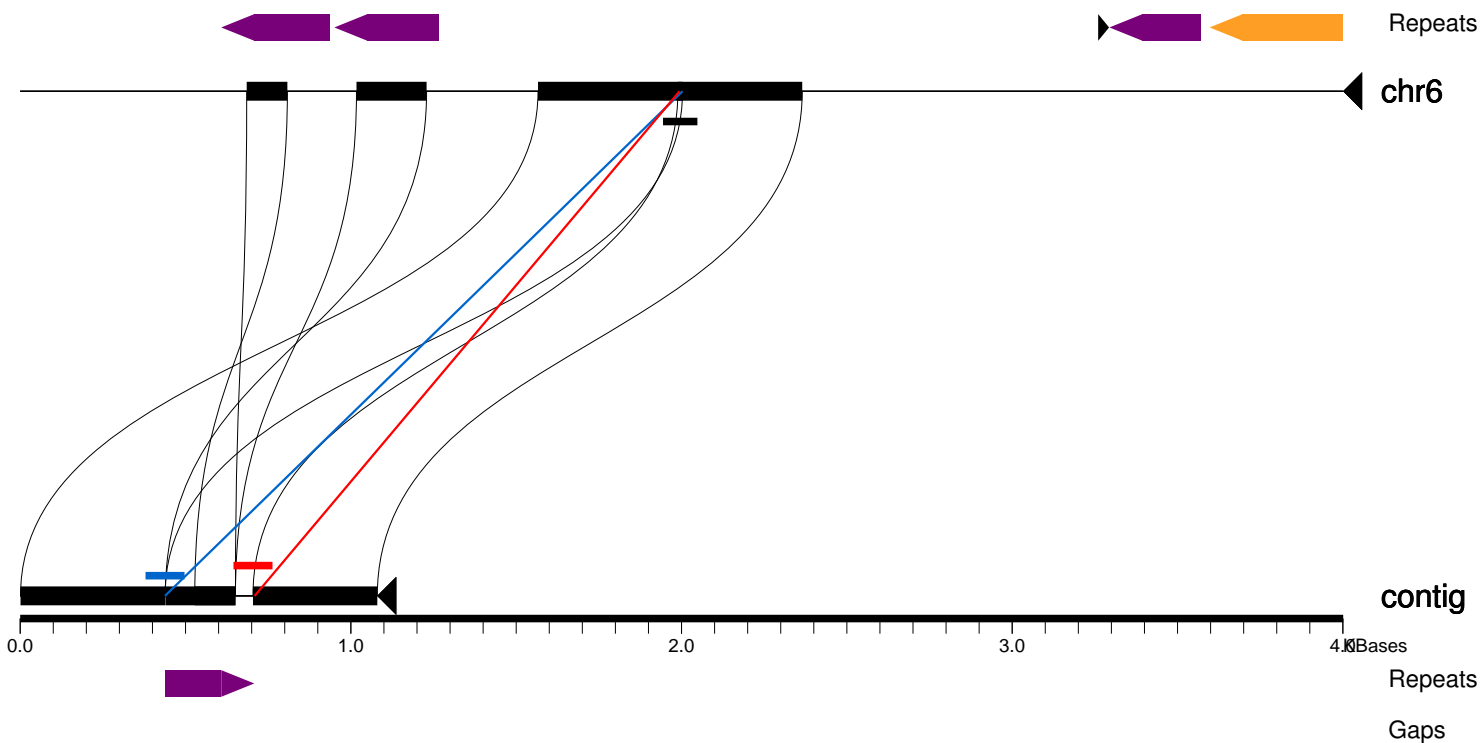

siteID: chr6\_131028583 Scafftig2 - Breakpoint: chr6:131028574

chr6:131028529-131028633

Overlap Length: 15 INS size: 431 Genotyped: No

```
left AAAGCAAATGTGGC--ACATA----TACACCATGG-----AATACTATGCAGCCATAAAAAAGGATG
chrom AAAGCAAATGTGGC--ACATA----TACACCATGG-----AATACTATGCAGCCATAAAAAAGGATG
right CAGTCCGGCCTGGGCGACAGAGCGAGACTCCGTCTCAAAAAAAAAAAAAAAAAAAAAAAAAAAAAAAGGATG
1*11*11111***111***1*11111**1**1*1111111111**1*11*111*111*1*****
```

  

```
left AGTTGGCNNNNNNNNNNNNNNNNNNNNNNNNNNNNNNNNNNNNNNNNNNNNNNNNNNNNNNNNNNNNNN
chrom AGTT-----CATGTCCTTTGCAGGGACATAGATGAAGCTGGAAATCATCATTCT
right AGTT-----CATGTCCTTTGCAGGGACATAGATGAAGCTGGAAATCATCATTCT
***2222222222222222222222222222222222222222222222222222222222222222222222
```

Other Simple Repeat Low Complexity DNA LTR LINE SINE

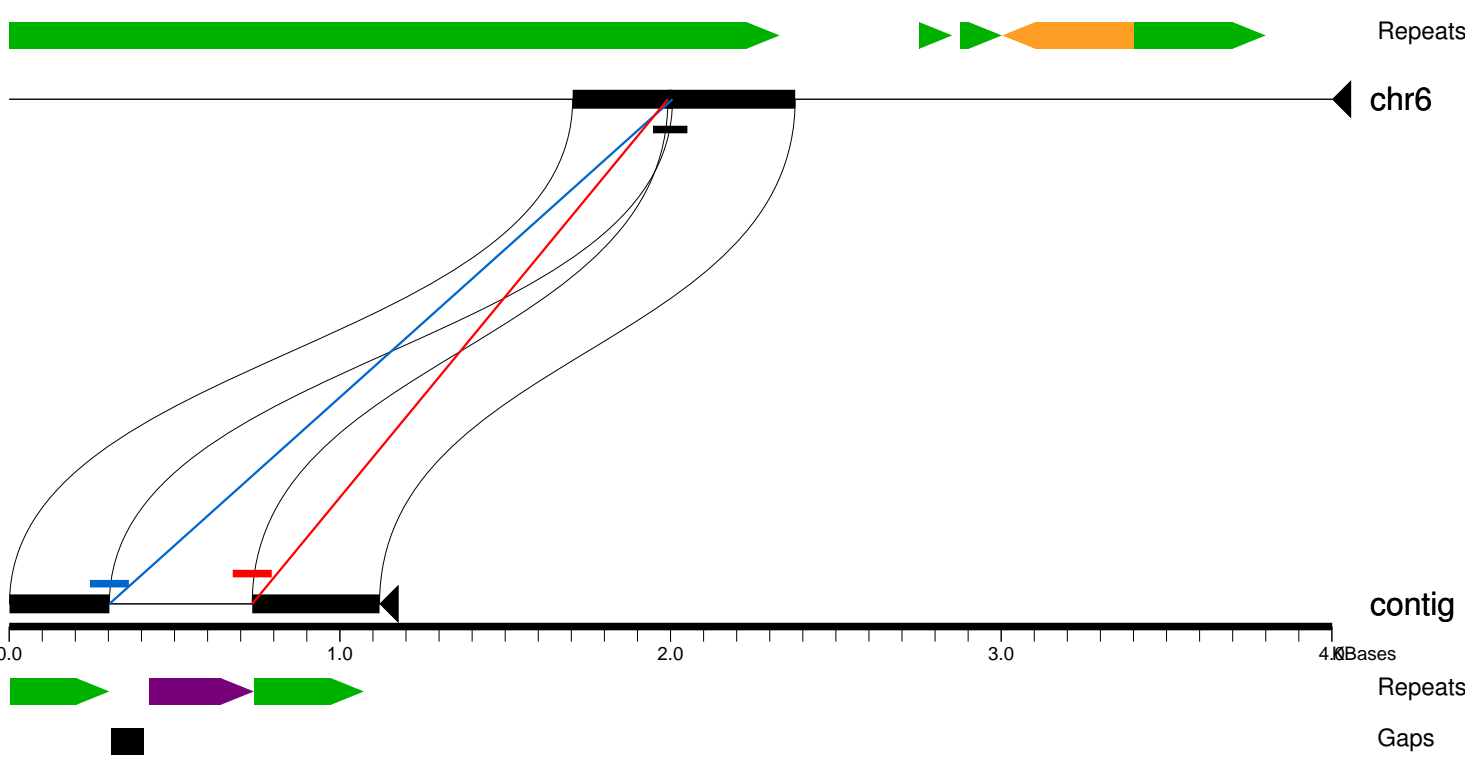

siteID: chr6\_131057584 Scafftig5 - Breakpoint: chr6:131057569

chr6:131057527-131057628

Overlap Length: 18 INS size: 302 Genotyped: Yes

```
left  --TTGTTTCAAGGAC----ATACTGATTTGAGTTCAA---TTAGGGAT-----GTGGTAGATTCTC
chrom --TTGTTTCAAGGAC----ATACTGATTTGAGTTCAA---TTAGGGAT-----GTTGGTAGATTCTC
right CCTCCTGCCTCTGCCTCCCAAAGTGCTGGGATTACAGGCGTGAGCCACCGCGCCCGGCCGGTAGATTCTC
      11*11*11*111*1*1111*1*1**1*11**1*1**1111*1**11*111111111*11*****22*****
```

```
left  CTTTTTTTAAAAAAAAAAAAAAAAAAAAAAAAAAAAAAAAAAAAAAAAAAAAAAAAAAAAAAAAAAAAAAAAAAAAAAAAA
chrom CTTTTTTTAAAGAGAACTATCTACA-----GTGCACCAGTAATGATATTTCAA--AGG-----
right CTTTTTTTAAAGAGAACTATCTACA-----GTGCACCAGTAATGATATTTCAA--AGG-----
      *****22222222*2*2*22222222*2*2222***222*2*2*2**2222***2222222222
```

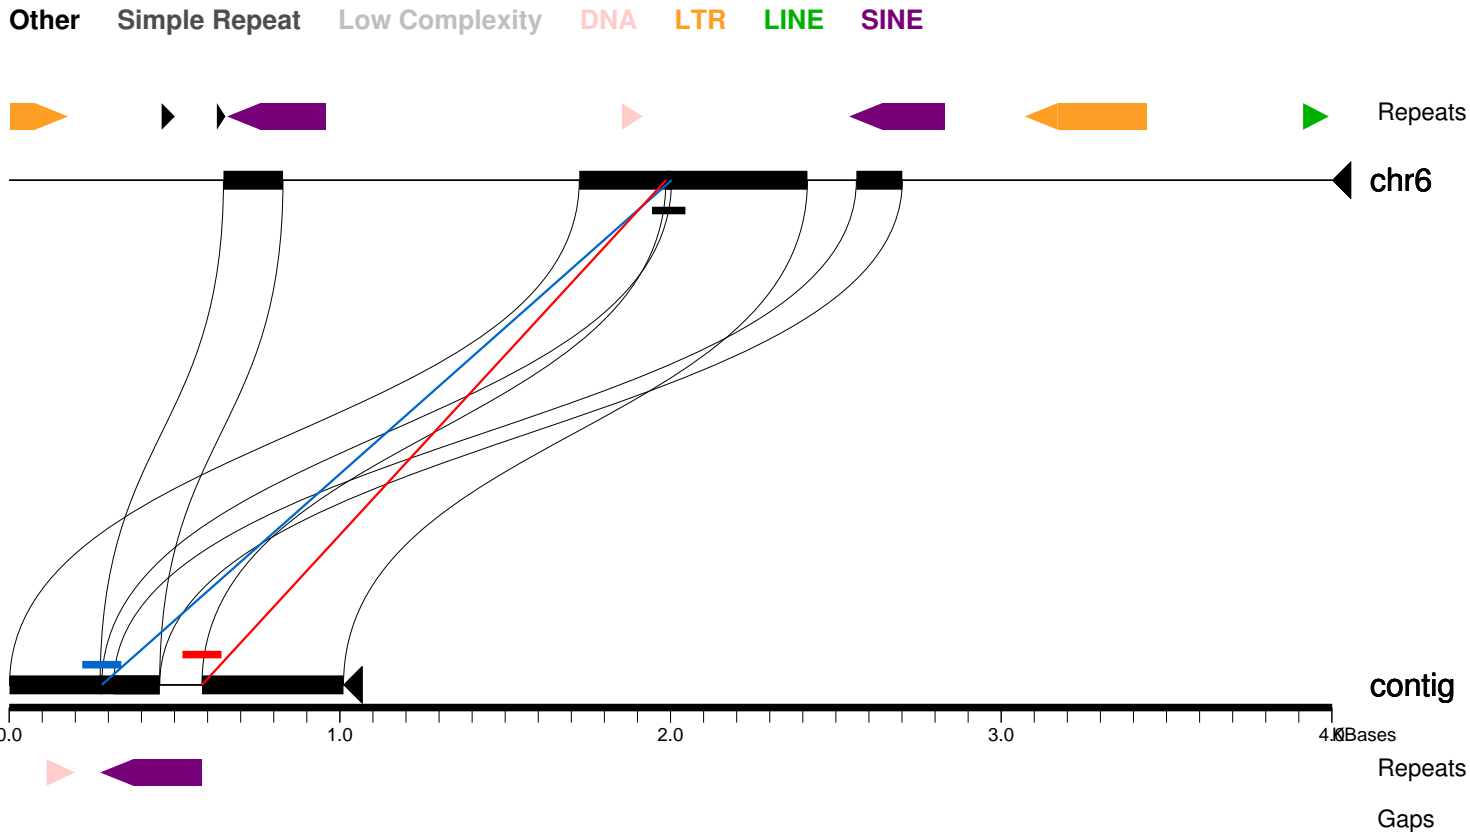

siteID: chr6\_131113268 Scafftig5 - Breakpoint: chr6:131113270

chr6:131113220-131113314

Overlap Length: 10 INS size: 313 Genotyped: Yes

```
left  ACA----CCGACCG-----TGTGCTAAACAG-GATT-TGTGTATCTAAAAGAATCTCAAAA----
chrom ACA----CCGACCG-----TGTGCTAAACAG-GATT-TGTGTATCTAAAAGAATCTCAAAA----
right GCCACTGCAGTCCGCAGTATGGCCTGGGCGACAGAGCGAGACTCCGTCTCAAAAAAAAAAAAAAAAAAAAA
1*111111*1*1***111111111111**1**1*1*1**1**111*11**1**1****1**1111****1111
```

```
left  ----TCTCAAGGCCGGGCCGGGCGCGGTGGCTCACGCCTGTAATCCCAGCACTTTGGGAGGCCGAGGCGG
chrom ----TCTCAAGGCCCAAG-----AATCCCGGCCTTCAAGGACTTTATGATATTGT-----
right AAAATCTCAAGGCCAAG-----AATCCCGGCCTTCAAGGACTTTATGATATTGT-----
11111*******22*222222222222222222*22**2*222*2*2**2*****22**2222*222222
```

```
left  GTG
chrom ---
right ---
222
```

Other Simple Repeat Low Complexity DNA LTR LINE SINE

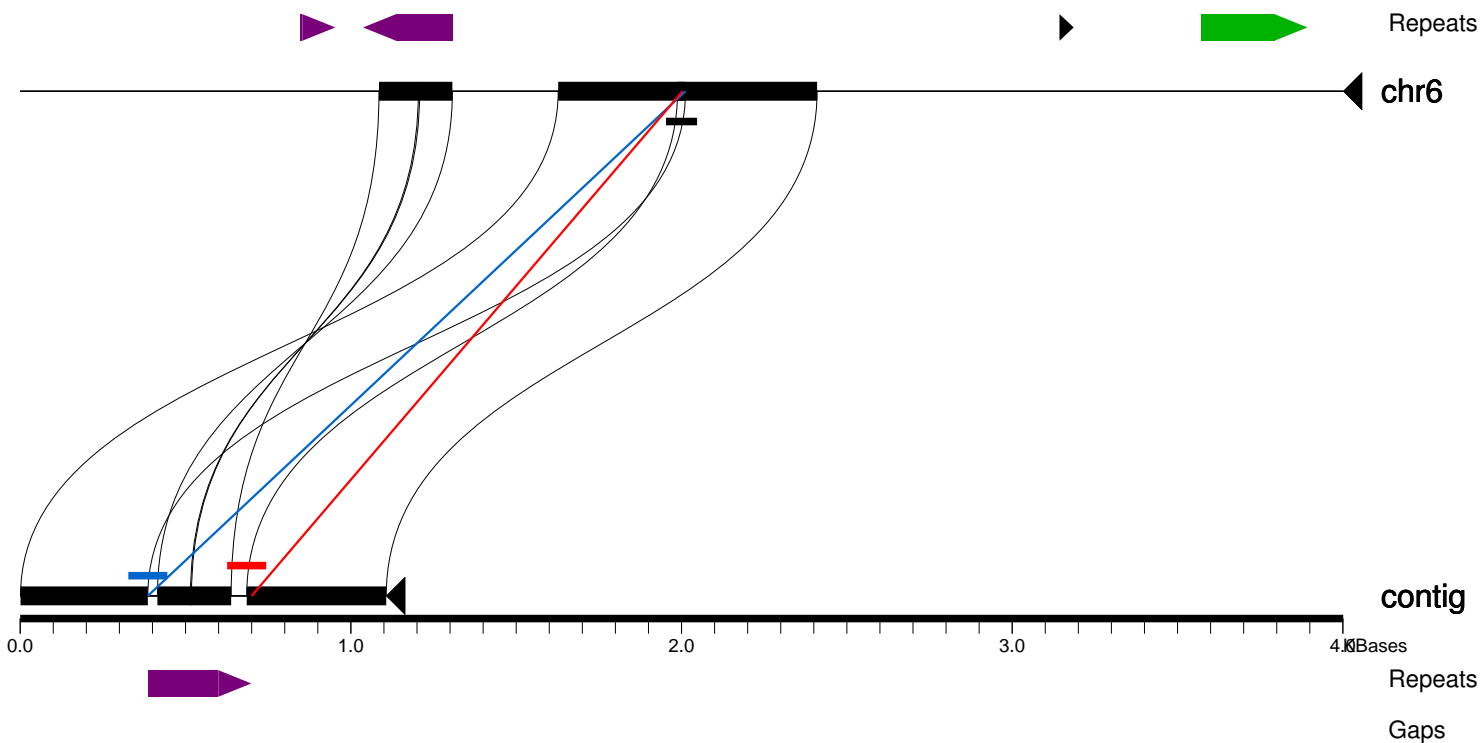

siteID: chr6\_133160117 Scafftig9 + Breakpoint: chr6:133160107

chr6:133160061-133160166

Overlap Length: 14 INS size: 297 Genotyped: Yes

```
left  -----TTAGCATTCATCTATGATGAAGAGAGCGGGCTGGTTACTCAG-----GAAATCAATACAGT
chrom -----TTAGCATTCATCTATGATGAAGAGAGCGGGCTGGTTACTCAG-----GAAATCAATACAGT
right CCGCCCGCCTCGGCCTCCCAAAGTGCTGG-GATTACAGGCGTGAGCCACCGCGCCCGGCCTCAATACAGT
      1111111111*11*1*1*111111*1*11*111*1***11*111*1*1*111111*111******
```

```
left  CTTT-----TTTTTTTTTTTTTTTTGAGACGGAGTCTCGCTCTGTGCGCCAGGCTGGAGTGCAGTGGCG
chrom CTTTAAACCATGGCATAAGTTTTTTTAAATA---AGTGT-GCATT-----AATCT----TGCAGT----
right CTTTAAACCATGGCATAAGTTTTTTTAAATA---AGTGT-GCATT-----AATCT----TGCAGT----
      ***222222*2222*22*****22*2*222***2*2**22*2222222*22**2222*****2222
```

Other Simple Repeat Low Complexity DNA LTR LINE SINE

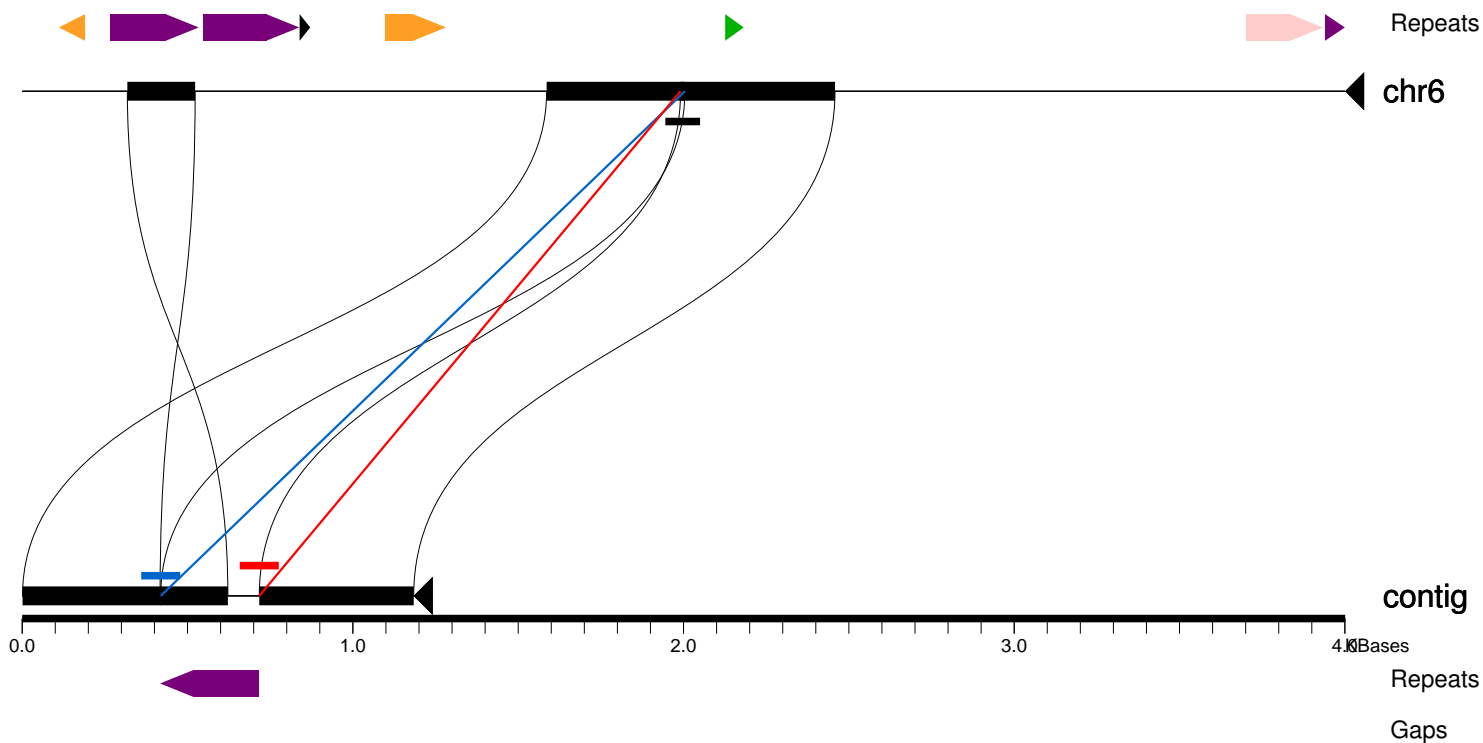



siteID: chr6\_133731753 Scaffitg5 - Breakpoint: chr6:133731758

chr6:133731712-133731817

Overlap Length: 14 INS size: 171 Genotyped: Yes

```
left  AGAG-----CTCCT-CCTAA----CCAAAAAAAAAAAAAAAAACTTCTGTATTTTCCATAGAACTA
chrom AGAG-----CTCCT-CCTAA----CCAAAAAAAAAAAAAAAAACTTCTGTATTTTCCATAGAACTA
right CCGGGTTCACGCCATTCTCCTGCCTCAGCCTCCCAAGTAGCTGGGACTACAGGCG---CCCGAGAACTA
      111*1111111111111111*****1***1*1111**1**11*1111111***1*1*1111111**11*****

left  AGGTCTTTTTTTTTTTTTTTTTTTTTTTTTTTTTTTTTTTTTTTTTTTTTTTTTTTGAGACAGAGTCTCGCTCTGT
chrom AGGTCTTAATTCCTTCTATCAATCATGTGTTTTTCCCGTTTGCATTGA-----AGGCT-----
right AGGTCTTAATTCCTTCTATCAATCATGTGTTTTTCCCGTTTGCATTGA-----AGGCT-----
      *****22**22**2*2*222*22*2*2*****22222***222*****22222**2**22222222
```

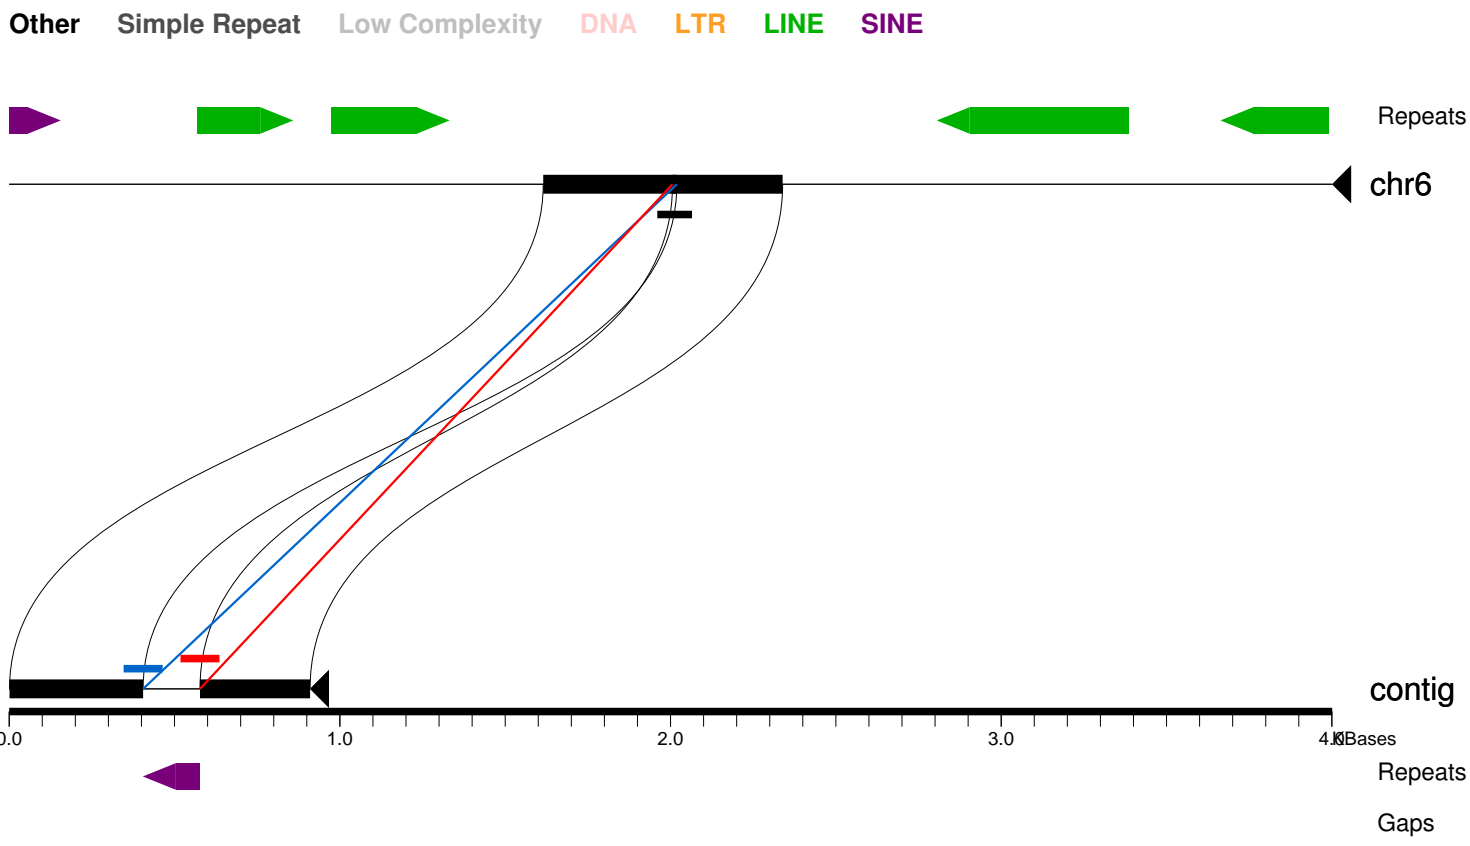



siteID: chr6\_13459572 Scaffitg5 - Breakpoint: chr6:13459578

chr6:13459537-13459637

Overlap Length: 19 INS size: 301 Genotyped: Yes

```
left  TGCAG--AAAAGT-----AACTGGACCCCTTCCTTACACCTTATAC-----AAAAATTAAGT
chrom TGCAG--AAAAGT-----AACTGGACCCCTTCCTTACACCTTATAC-----A AAAATTAAGT
right TGCAGTCCAGCCTGGGCGACAGAGCGAGACTCCGTCTCAAAAAAAAAAAAAAAAAAAAAAAAAAAAAA AAAATTAAGT
      ****1111*11***11111111*1*11***1**1**111*1*1111*1*1111111111******
```

```
left  CAAGATGGGCCGGGCGCGGTGGCTCACGCCTGTAATCCCAGCACTTTGGGAGGCCGAGGCGGGCGGA
chrom CAAGATGGATTAAA-----GACTTAAATATAAAATCCAAA-ACCATAAAAAACCT-----
right CAAGATGGATTAAA-----GACTTAAATATAAAATCCAAA-ACCATAAAAAACCT-----
      *****222222222222*2**2*2222*22*****2*22**22*222*22**222222222222
```

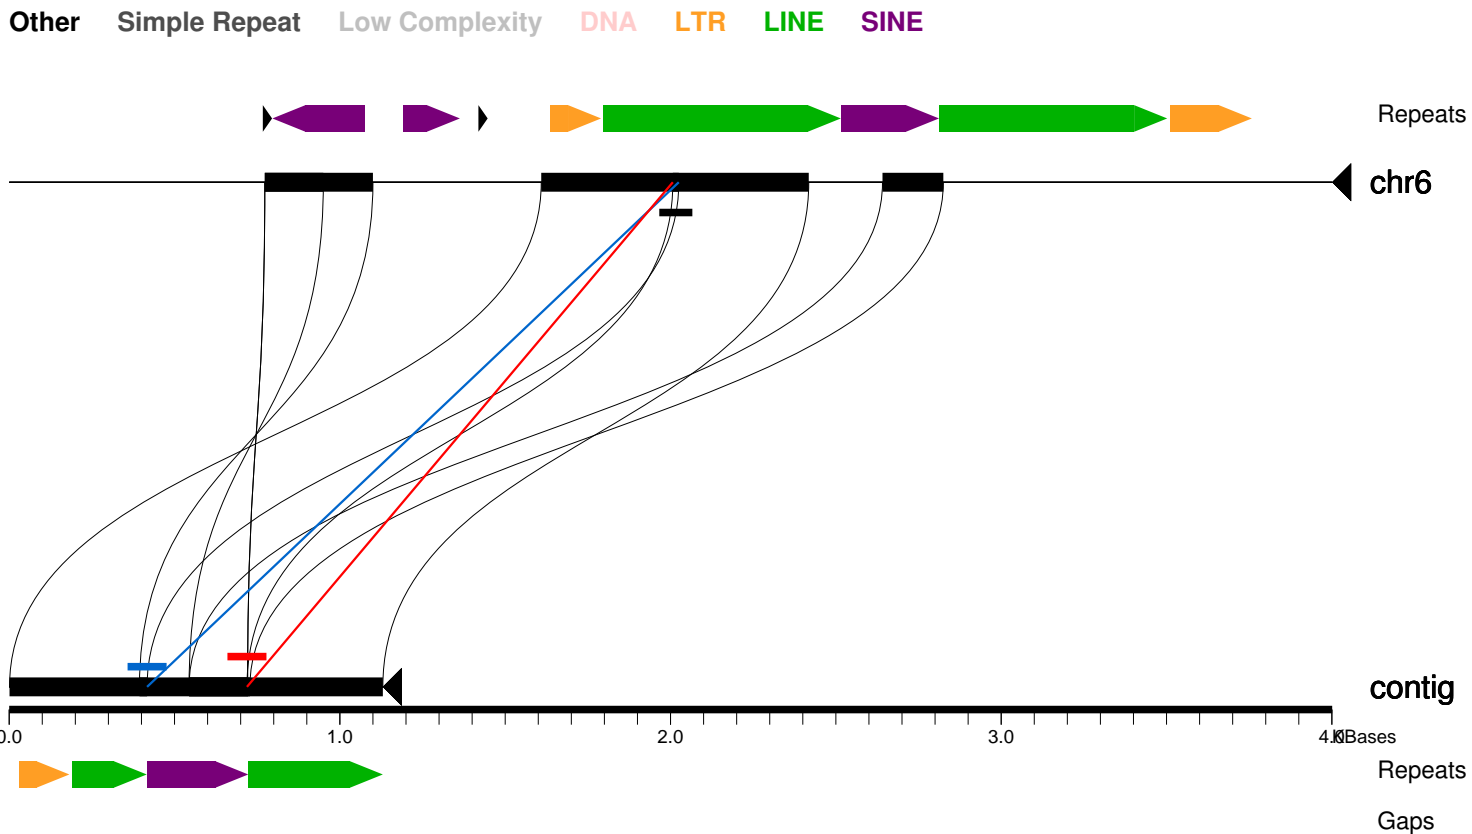















siteID: chr6\_141134055 Scafftig4 + Breakpoint: chr6:141134052

chr6:141134008-141134111

Overlap Length: 16 INS size: 308 Genotyped: Yes

```
left AAA--GGAATAGAATTT--AAACT-CTAGAAATAAACCCATGTGTCTAT-----GGTCAACTGAT
chrom AAA--GGAATAGAATTT--AAACT-CTAGAAATAAACCCATGTGTCTAT-----GGTCAACTGAT
right CCGCCCGCCTCGGCCTCCCAAAGTGCTGGGATTACAAGCGTGAGCCACCGCGCCCGGCCGGTCAACTGAT
      1111111*11*1*111*111***1*1**1*1*1**1*1*1*1*1111111111111111*****
```

```
left TTTCATTTTTTTTTTTTTTTTTTTTTTTTTTTTTTTTTTTTGGAGACGGAGTCTCGCTCTGTGGCCAGGTGGGA
chrom TTTCATGAAAGAGTGCCAAATTCATCATTG-GAGAAAAAGTCTTTCAAC-----A
right TTTCATGAAAGAGTGCCAAATTCATCATTG-GAGAAAAAGTCTTTCAAC-----A
      ***2222222*222222*222*22*22***222*****22*2222222222222222222*
```

Other    Simple Repeat    Low Complexity    DNA    LTR    LINE    SINE

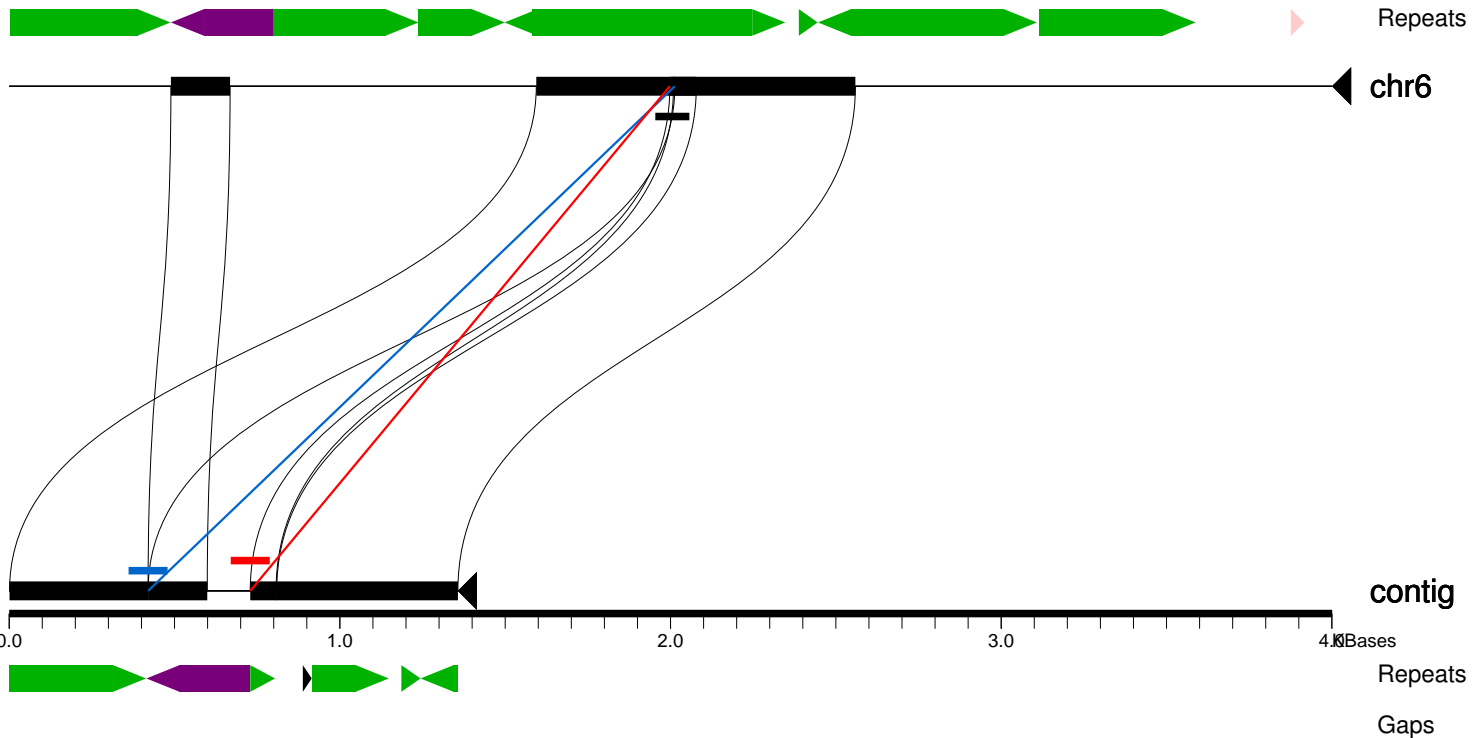



siteID: chr6\_141770872 Scafftig8 + Breakpoint: chr6:141770870

chr6:141770844-141770929

Overlap Length: 13 INS size: 308 Genotyped: Yes

left CCAGA-----AACATACATATTTTATAGTTT-----TTCTTTGCTTC  
 chrom CCAGA-----AACATACATATTTTATAGTTT-----TTCTTTGCTTC  
 right TCCGCCCCGCTCGGCCTCCCAAAGTGCTGGGATTACAGGCGTGAGCCACCGCGCCCGGC\*\*TTCTTTGCTTC  
 1\*1\*11111111111111111111\*\*11\*1\*11111\*\*\*1\*\*11111111111111111111\*\*\*\*\*

left TTTTTTTTTTTTTTTTTTTTTTTTTTTTTTGTGAGACGGAGTCTCGCTCTGTCGCCAGGCTGGAGTGCAGT  
 chrom TTTAAATTTTCCTTTATTTATTT-----TCAGA---AGTCTTTGTCTTTCTTT-----  
 right TTTAAATTTTCCTTTATTTATTT-----TCAGA---AGTCTTTGTCTTTCTTT-----  
 \*\*222\*\*\*\*22\*\*\*2\*\*\*2\*\*\*2222222\*2\*\*\*222\*\*\*\*222\*\*\*2\*\*2222222222222222222

left GCGGGATCTCG  
 chrom -----TCACT  
 right -----TCACT  
 2222222\*\*2\*2

Other Simple Repeat Low Complexity DNA LTR LINE SINE

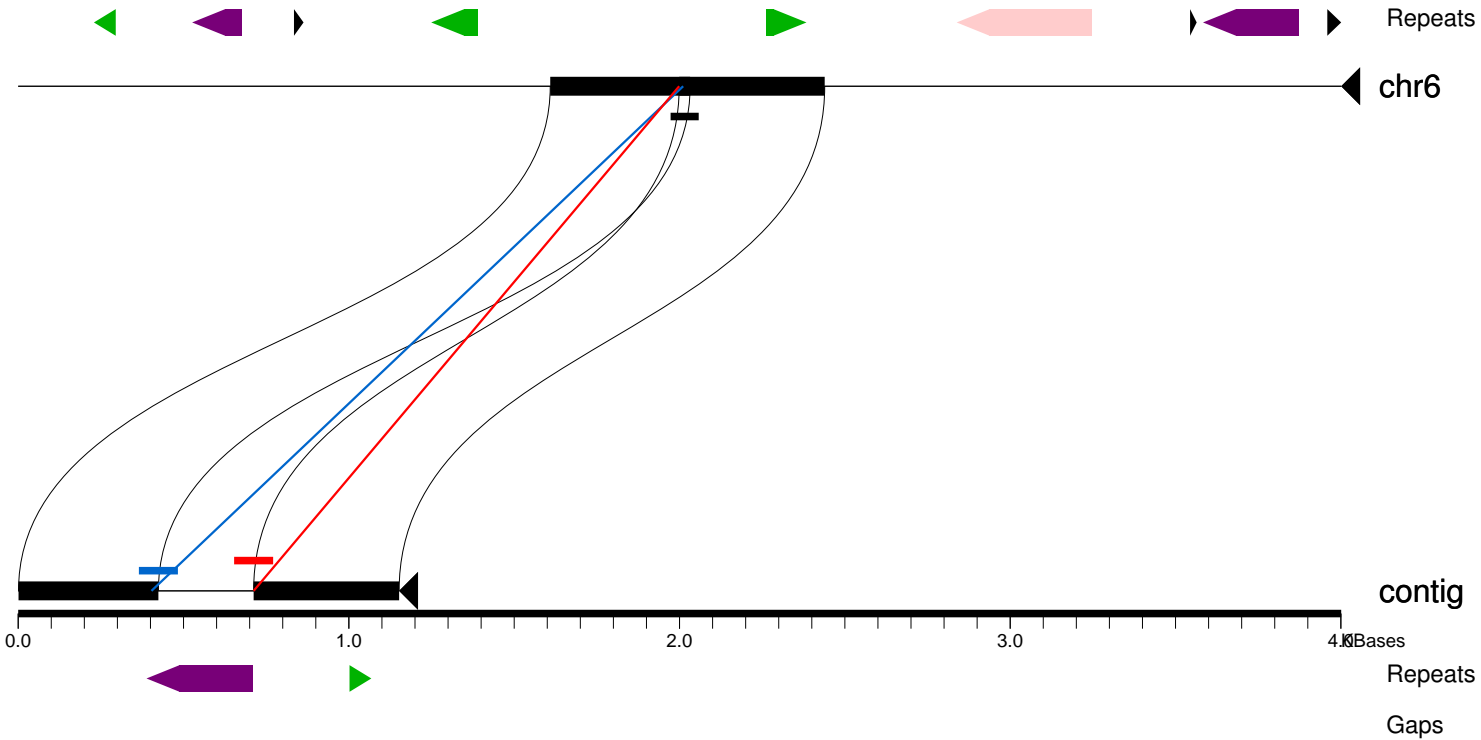

siteID: chr6\_143951368 Scafftig3 - Breakpoint: chr6:143951371

chr6:143951316-143951424

Overlap Length: 5 INS size: 311 Genotyped: Yes

```
left  TTAT---TTGAATGA-AGATCAAAAAA-----TTAA-AAGACTTTATTTACTATCATTTAAAAATATTTTC
chrom TTAT---TTGAATGA-AGATCAAAAAA-----TTAA-AAGACTTTATTTACTATCATTTAAAAATATTTTTC
right CTCCAGCCTGGGCGACAGAGCGAGACTCCGTCTCAAGAAAAAAAAAAAAAAAAAAAAAAAAAAAAAAAAATTTTTTC
      1*1111111**111**1***1*1*1*11111111*1**1**1*1111*111*11*11*111*****11*****

left  GCCGGGCGCGGTGGCTCACGCCTGTAATCCCAGCACTTTGGGAGGCCGAGGCGGGCG-GA---
chrom -----TTGTTTT-GTATG-AATGCAAACA-TTGAGGAAACAAAGTATGTCTAGAAAAG
right -----TTGTTTT-GTATG-AATGCAAACA-TTGAGGAAACAAAGTATGTCTAGAAAAG
      22222222222*2*2*222*22**2***2*2*2**2**22***22*22**222*2*22**222
```

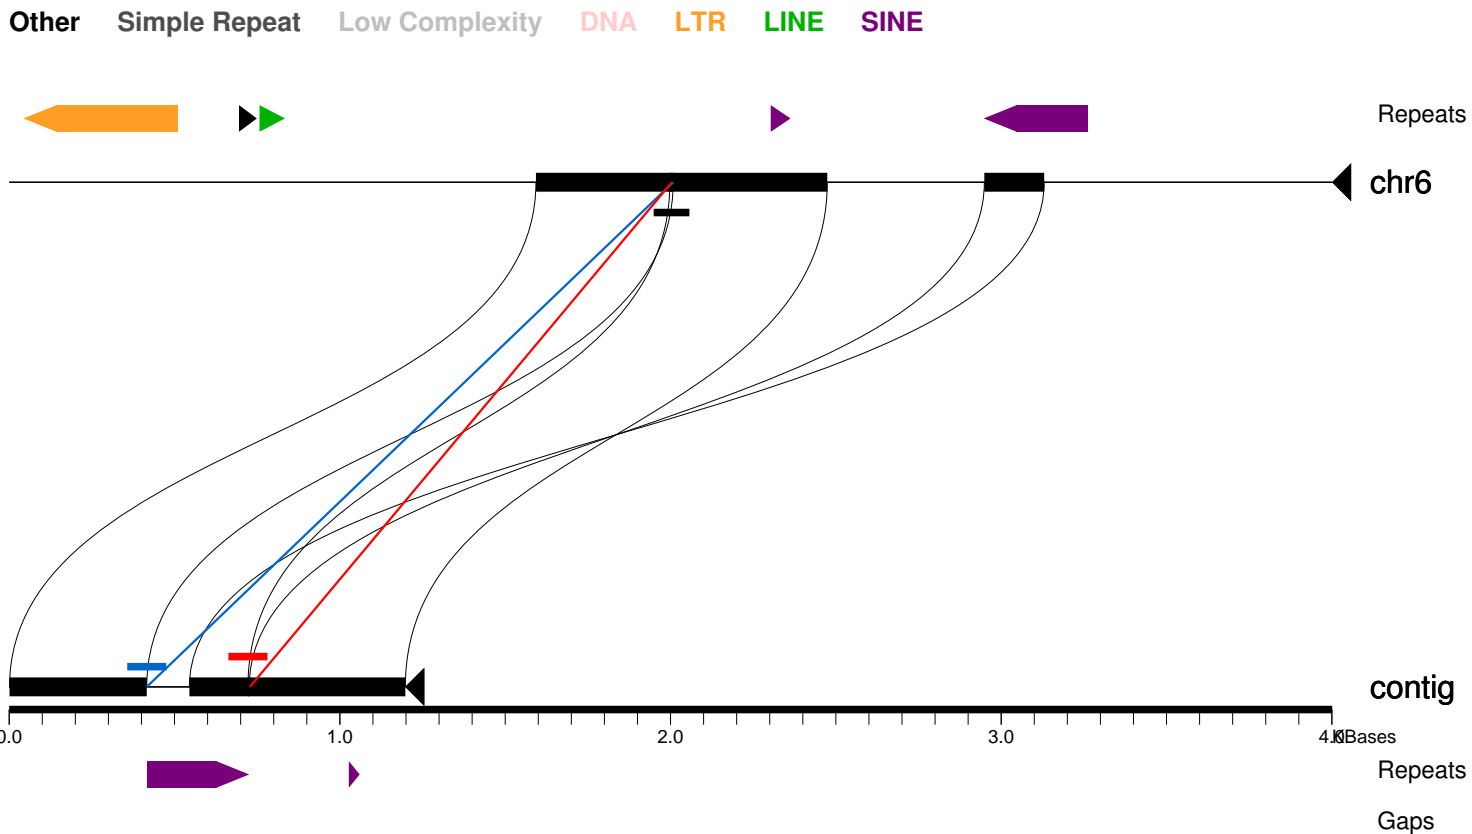

siteID: chr6\_153633391 Scafftig5 + Breakpoint: chr6:153633370

chr6:153633324-153633429

Overlap Length: 14 INS size: 291 Genotyped: Yes

```
left  GTATACTTCATGCATTCTCCCACT-CTCCCAAAGA----TATTCACATT-----TTTTCTCTGC
chrom GTATACTTCATGCATTCTCCCACT-CTCCCAAAGA----TATTCACATT-----TTTTCTCTGC
right CCGCCACCTCGGCCTCCCAAAGTGCTGGGATTACAGGCGTGAGCCACCGCGCCAGCCTTTTCTCTGC
      11111*11*11*111**1*11*1*1**111*11*1*1111*1111***111111111111*****
```

```
left  CTTTTTTTTTTTTTGAGACGGAGTCTCGCTGTCGCCAGGTTGGAGTGCAGTGGCGCGATC-
chrom CTCTGAACTTCT-----AACGTCTCTTCTCTATCTCTCCTCTCAGCT-----GATCA
right CTTCTGAACTTCT-----AACGTCTCTTCTCTATCTCTCCTCTCAGCT-----GATCA
      **2*2222**2*22222*22*22***22**2*22*2*222*222**22222222222****2
```

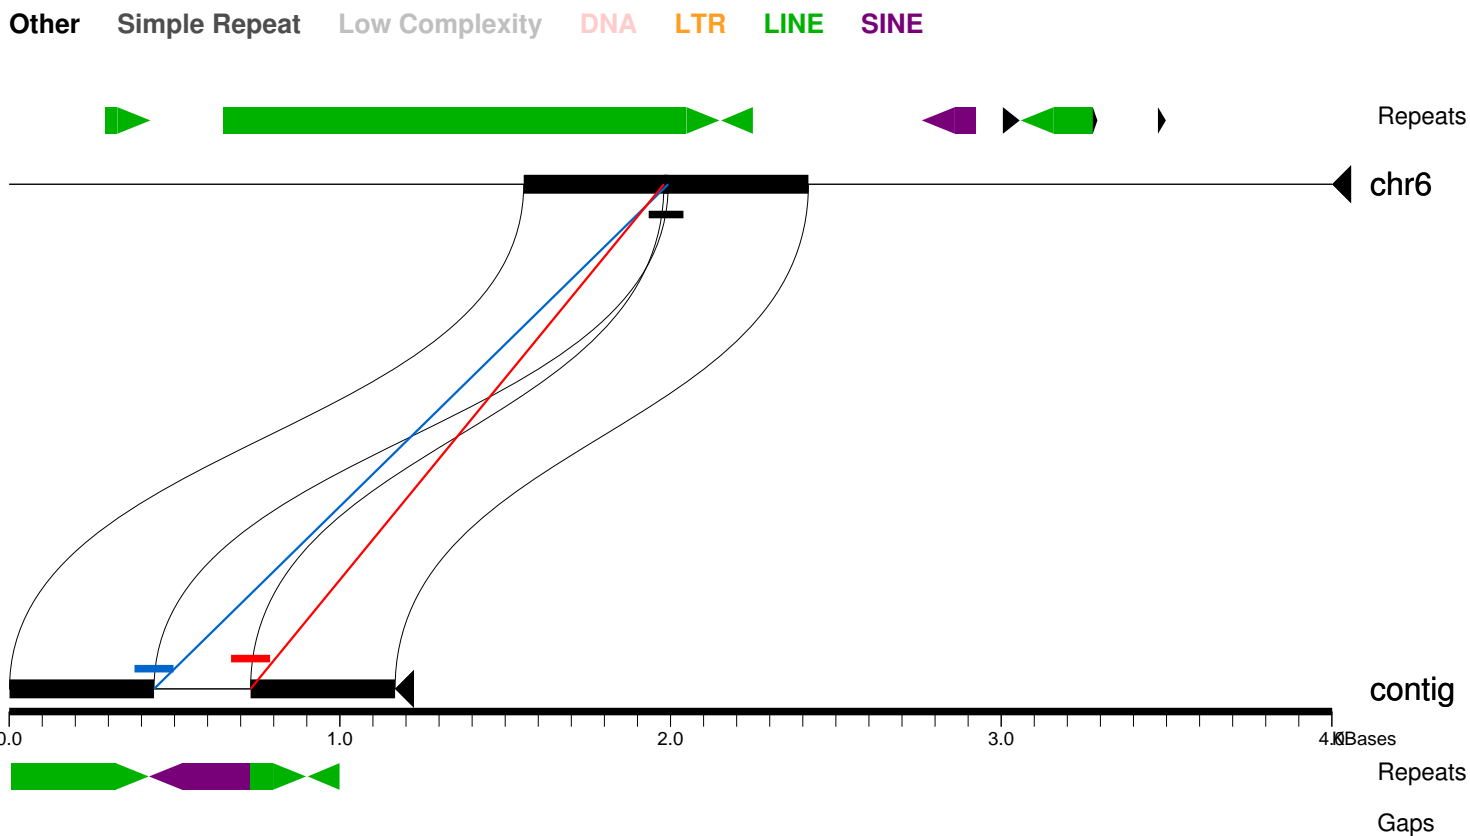



siteID: chr6\_157397658 Scafftig5 + Breakpoint: chr6:157397675  
chr6:157397630-157397734  
Overlap Length: 12 INS size: 343 Genotyped: No

```
left    CA-----TTTACTGCTATACTACTGA-----AGAAATGAATGTCTCCAGAAGGC--TCATGCCTTTT
chrom   CA-----TTTACTGCTATACTACTGA-----AGAAATGAATGTCTCCAGAAGGC--TCATGCCTTTT
right  CACCCGCCTCGGCCTCCCAAAGTGCTGGGATTACAGGCGTGAGCCACCGCGCCCGGCCTTCATGCCTTTT
      **1111111*1111**1*1*1*1*1***1111111**111***1111*11*1111***11*****

left    TTTNNNNNNNNNNNNNNNNNNNNNNNNNNNNNNNNNNNNNNNNNNNNNNNNNNNNNNNNNNNNNNNNNNNNNN
chrom   TATTGTGTTATTTTTAGAGATTCTGTGTGCTAAGCATTGTACTTCTAAG-----
right  TATTGTGTTATTTTTAGAGATTCTGTGTGCTAAGCATTGTACTTCTAAG-----
      *2**22222222222222222222222222222222222222222222222222222222222222222222
```

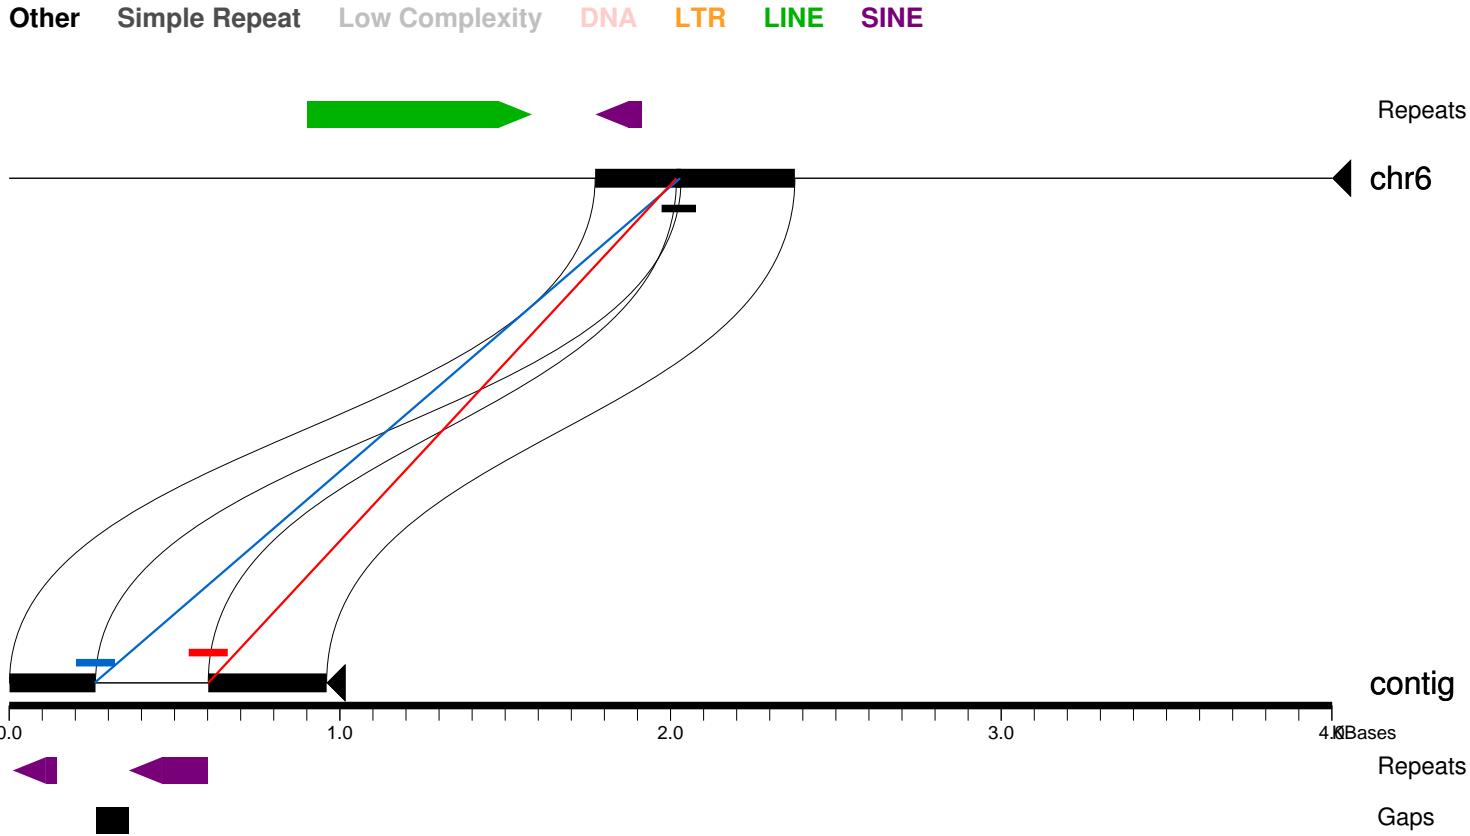



siteID: chr6\_159166282 Scaffitg1 - Breakpoint: chr6:159166286

chr6:159166243-159166345

Overlap Length: 17 INS size: 302 Genotyped: Yes

```
left  AT-----TTGTGTTAAAGAATGAGAT--CGTGT-----AACATTTATTGCTAGGCAAAAACTGTAT
chrom AT-----TTGTGTTAAAGAATGAGAT--CGTGT-----AACATTTATTGCTAGGCAAAAACTGTAT
right GCACTCCAGCCTGGGGCGACAGAGCGAGACTCCGTCTCAAAAAAAAAAAAAAAAAAAAAAAAAAAAAA
111111111111*1*1*11*1***11***111***1*11111**1*111*11111*111*****
```

  

```
left  CTAGGC CGGGCGCGGTGGCTCATGCCTGTAATCCCAG-CACTTTGGGAGGCCGAGGCGGGCGGATC
chrom CTAGGC AAGA-GAGG-GCCTTCTGA--GGATTCTCTGTCTCCTTG--AGATAGAA-----
right CTAGGC AAGA-GAGG-GCCTTCTGA--GGATTCTCTATCTCCTTG--AGATAGAA-----
*****22*22*2**2*2**22**222*2*2**2*212*2*2***22**222**222222222222
```

Other Simple Repeat Low Complexity DNA LTR LINE SINE

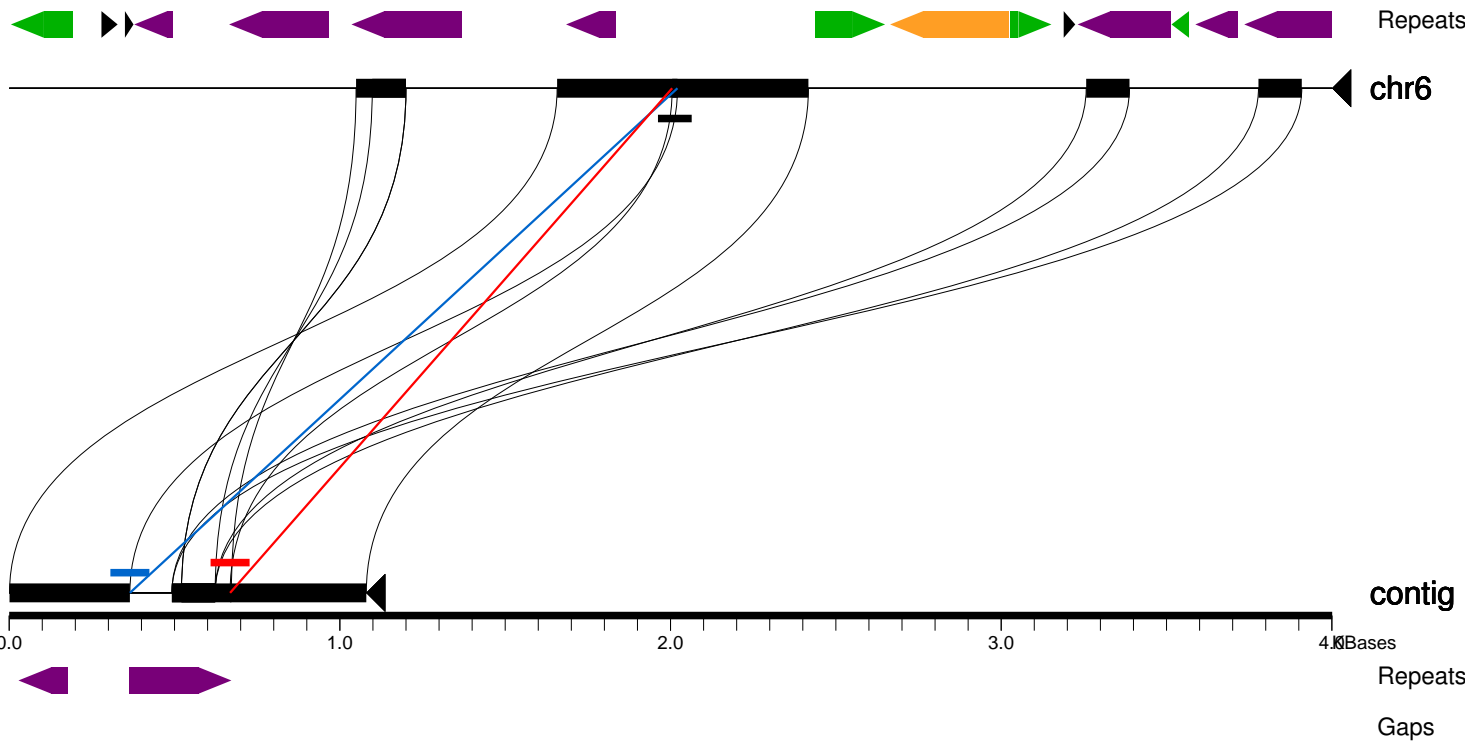

siteID: chr6\_162707242 Scaffitg2 - Breakpoint: chr6:162707268

chr6:162707221-162707327

Overlap Length: 10 INS size: 312 Genotyped: Yes

left AT-----GTATAAAA-TGCCACATT--AGGGC--ACAGGTTTTATCA--CGTTTTTTTGTAGCTAATTT  
chrom AT-----GTATAAAA-TGCCACATT--AGGGC--ACAGGTTTTATCA--CGTTTTTTTGTAGCTAATTA  
right TCCGCCCCGCCTCGGCCTCCCAAAGTGCTGGGATTACAGGCGTGAGCCACCGCGCCCGGCCTAGCTAATTA  
11111111\*11\*11111\*1\*\*\*1\*1\*111\*\*\*111\*\*\*\*\*11\*1\*1\*111\*\*111N11112\*\*\*\*\*2

left TTTTTTTTTTTTTTTTTTTTTTTTTTTTTTTTGAGACGGAGTCTCGC-TCTGTCGCCCAGGCTG  
chrom TTGAATCCAAAGCCTTTCCAAACTTGTTTTTGGATG--TTCTTGTGTTTGT-----  
right TTGAATCCAAAGCCTTTCCAAACTTGTTTTTGGATG--TTCTTGTGTTTGT-----  
\*\*222\*22222222\*\*\*222222\*\*2\*\*\*22\*\*2\*222\*\*\*2\*22\*2\*\*\*22222222222

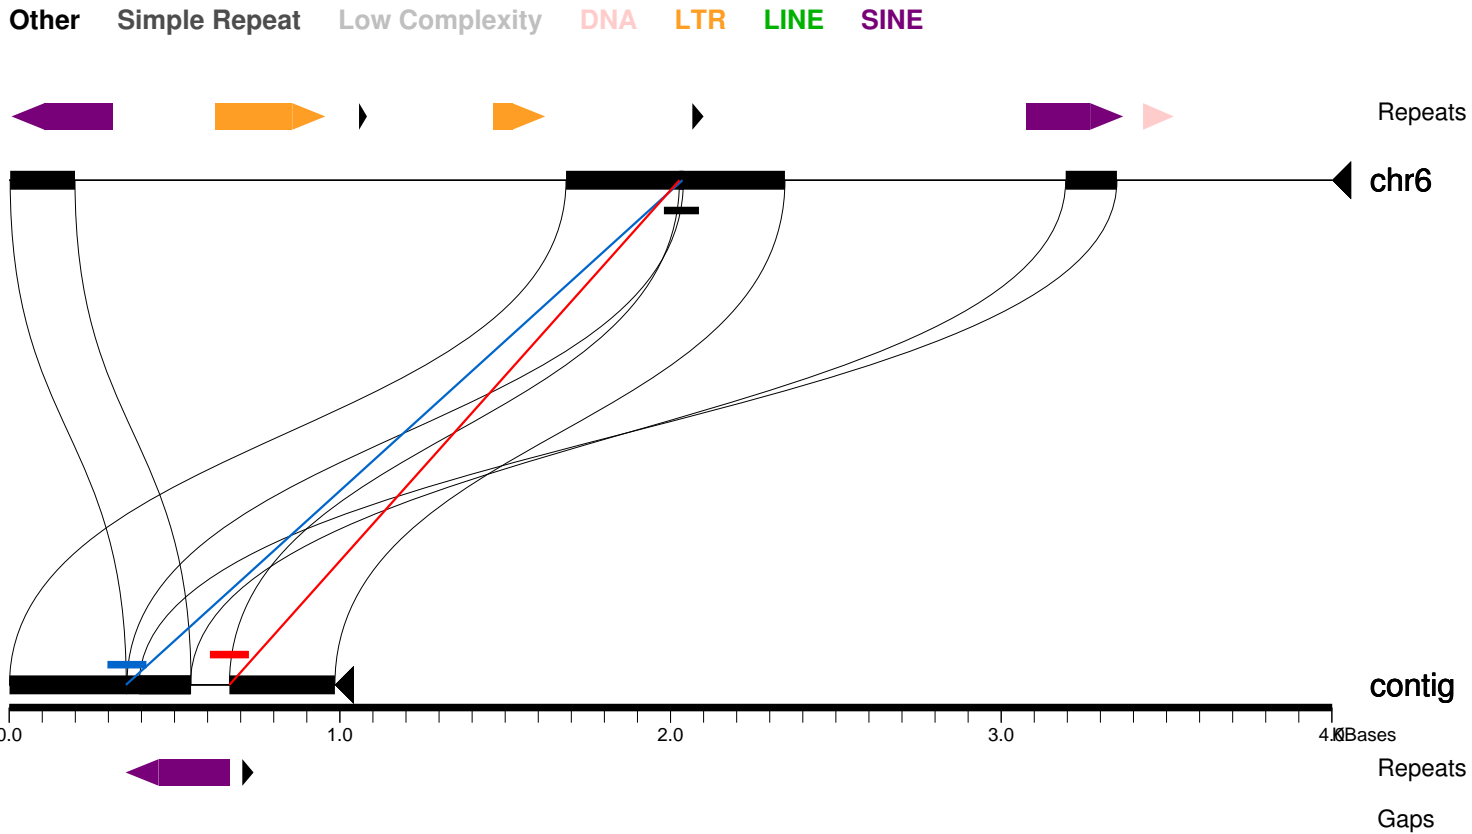

siteID: chr6\_163814209 Scafftig11 - Breakpoint: chr6:163814216

chr6:163814171-163814275

Overlap Length: 15 INS size: 297 Genotyped: Yes

```
left   A-----ACTCCAT----GGTAATGACGCTGTACT--GGAAAAAAGAGAGGTTAGATAAAAAGATGAGG
chrom  A-----ACTCCAT----GGTAATGACGCTGTACT--GGAAAAAAGAGAGGTTAGATAAAAAGATGAGG
right  CGCCACTGCACTCCAGCCTGGGCGACAGAGCGAAACTCCGTCTCAAAAAAAAAAAAAAAAAAAAAGATGAGG
1111111111*****111111**11*11111**1111***11*1111***1*1*1111*1*1*****
```

```
left   TCTCGGCCGGGCGCGGTGGCTCACGCCTGTAATCCCAGCACTTTGGGAGGCCGAGACGGGCGG
chrom  TCTC-----CAAGTT---TTA-GAGTGAAAATGCTAAATGTTGCTT---AGATTTTGTGTG
right  TCTC-----CAAGTT---TTA-GAGTGAAAATGCTAAATGTTGCTT---AGATTTTGTGTG
***2222222*22*2*222*2*2*22**2**222*222*22***2222222**2222*222*
```

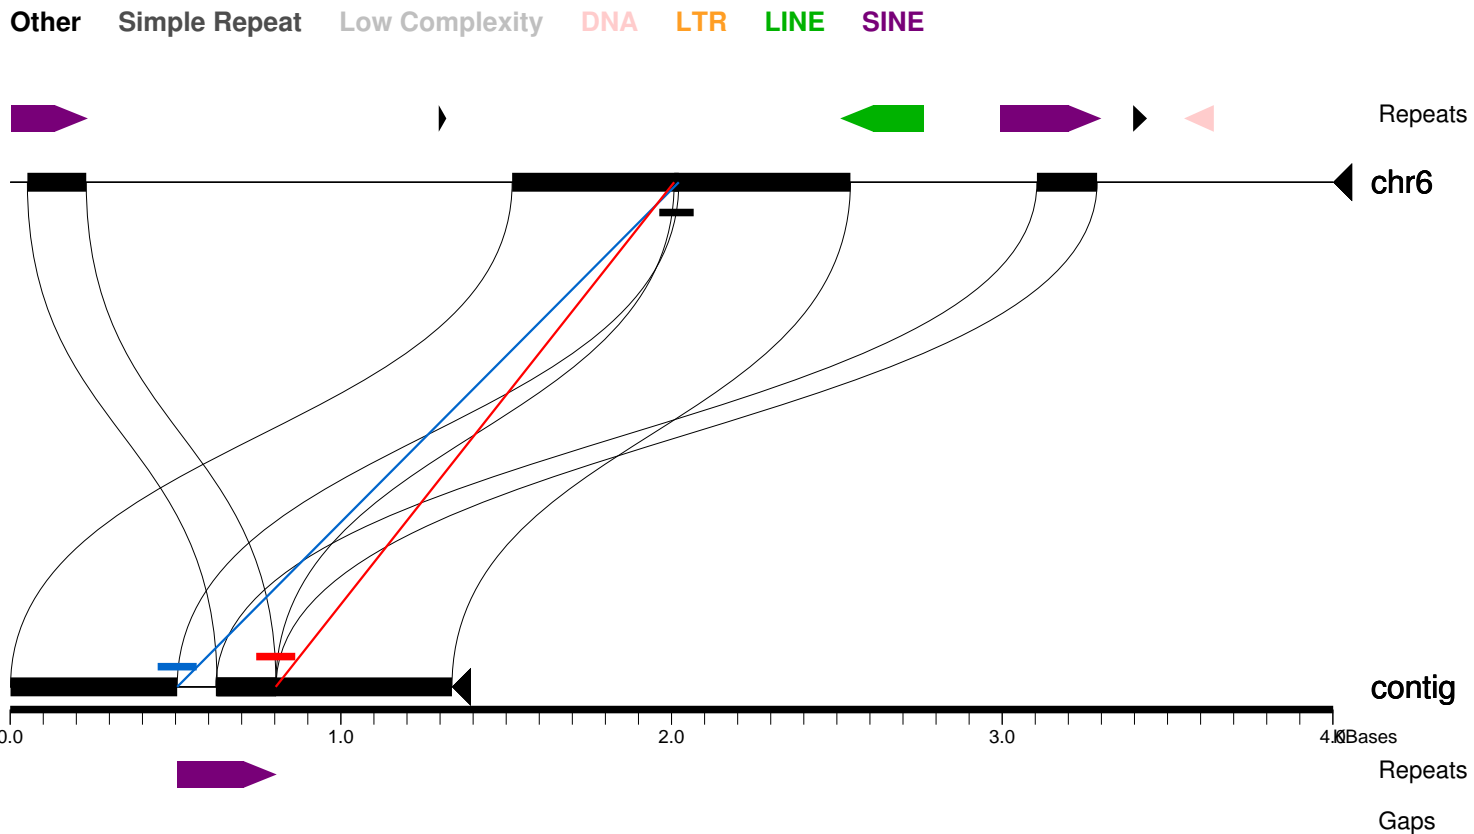

siteID: chr6\_164161976 Scafftig4 - Breakpoint: chr6:164161904

chr6:164161845-164161970

Overlap Length: -6 INS size: 102 Genotyped: Yes

```

left  TTTCCACAGCCTAGGTTTCAACTCAACGCAGAGGGGAATGGGACTCATTTCCTTTTTTTTTTTTTTTTT
chrom TTTCCACAGCCTAGGTTTCAACTCAACGCAGAGGGGAATGGGACTCATTTCCTTTTTTAATATAGCAT
right CTGTC---GCCAGGCTGGAGTGCAGTG--GCGGGATCTCGG-CTCACTG-CAAGCTCCGCCTCCCGCAT
      1*11*111***1***1*11*111**11*11*1***111*1**1****1*11*1111*111NN*N1N222*

```

```

left  TTTTTTTTTTTTTTTTTT---GAGACGGAGTCTCGCTCTG-----TCGCCAGGCTGG
chrom TCTATCTCCATGATTAAAGGGATACAAAA-CACACTGTGGGAATTTTAGGAAATGCT--
right TCTATCTCCATGATTAAAGGGATACAAAA-CACACTGTGGGAATTTTAGGAAATGCT--
      *2*2*2*222*22**22222**2**22*22*2*2**2**2222222*2*222*2***22

```

Other Simple Repeat Low Complexity DNA LTR LINE SINE

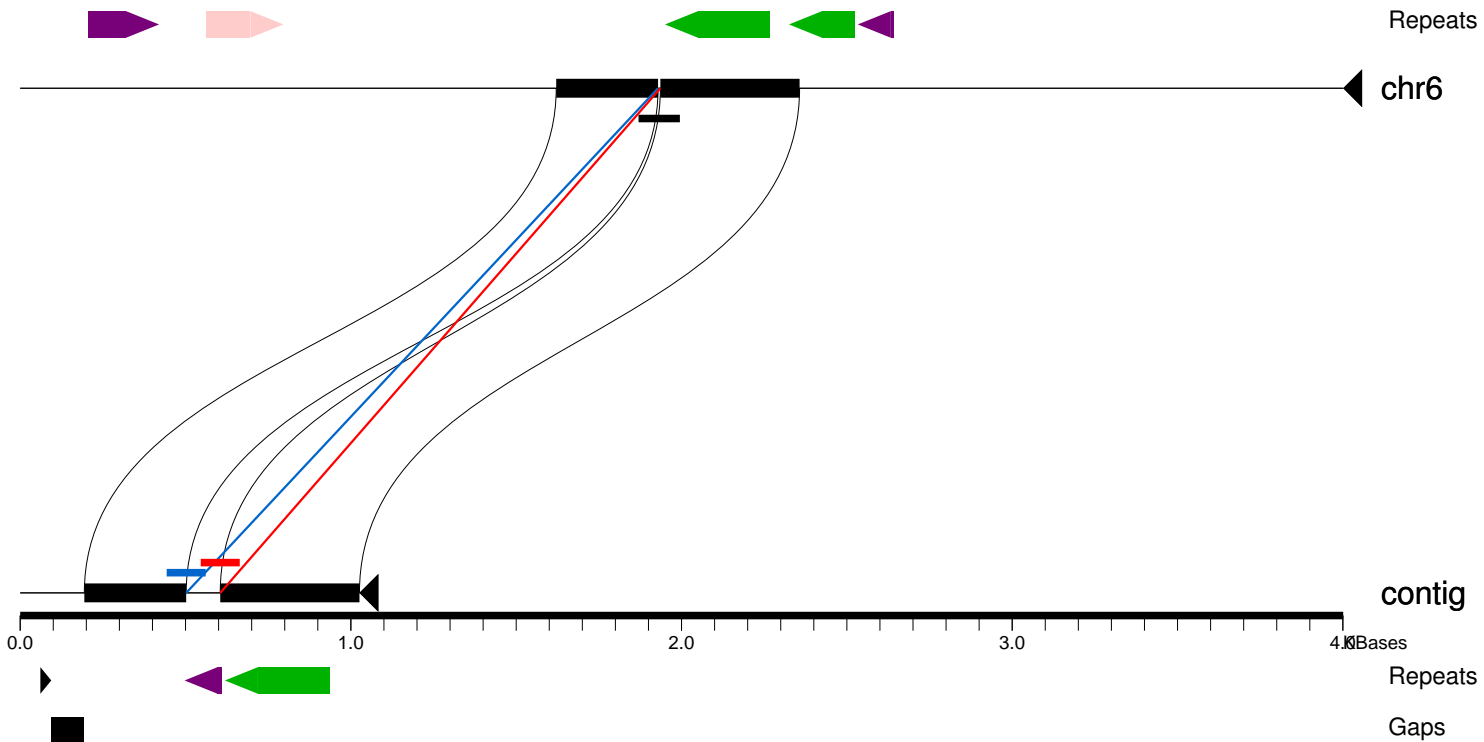

siteID: chr6\_165186956 Scafftig1 + Breakpoint: chr6:165186931

chr6:165186892-165186990

Overlap Length: 15 INS size: 275 Genotyped: Yes

```
left ---AATCCAAGAAGTAGTAAA--GATGG--TGGGG-----AATTCCTG-----AATCCCAAAAAGCCT
chrom ---AACCCAAGAAGTAGTAAA--GATGG--TGGGG-----AATTCCTG-----AATCCCAAAAAGCCT
right TCGATCTCCTGACCTCGTGATCCGCCCCGCCCTCGGCCTCCCAAAAGTCTGGGATTACAGGCCCAAAAAGCCT
111*121*11**11*1**1*111*111*11*1**1111111**1*1***1111111*11*****

left TCTTTTTTTTTTTTTTTTTTTGAGACGGAGTCTCGCTCTGTCGCCCAGGCTGGAGTGCAGTGGCGCGATCT
chrom TCTTAATTTTGGACCATTG-GACATTCA-TATATGTGTGT-----GTGTGTAGTAA-----T
right TCTTAATTTTGGACCATTG-GACATTCA-TATATGTGTGT-----GTGTGTAGTAA-----T
***22*****22222**22**2*222*2*2*222*2***22222222222*2***2***222222222*
```

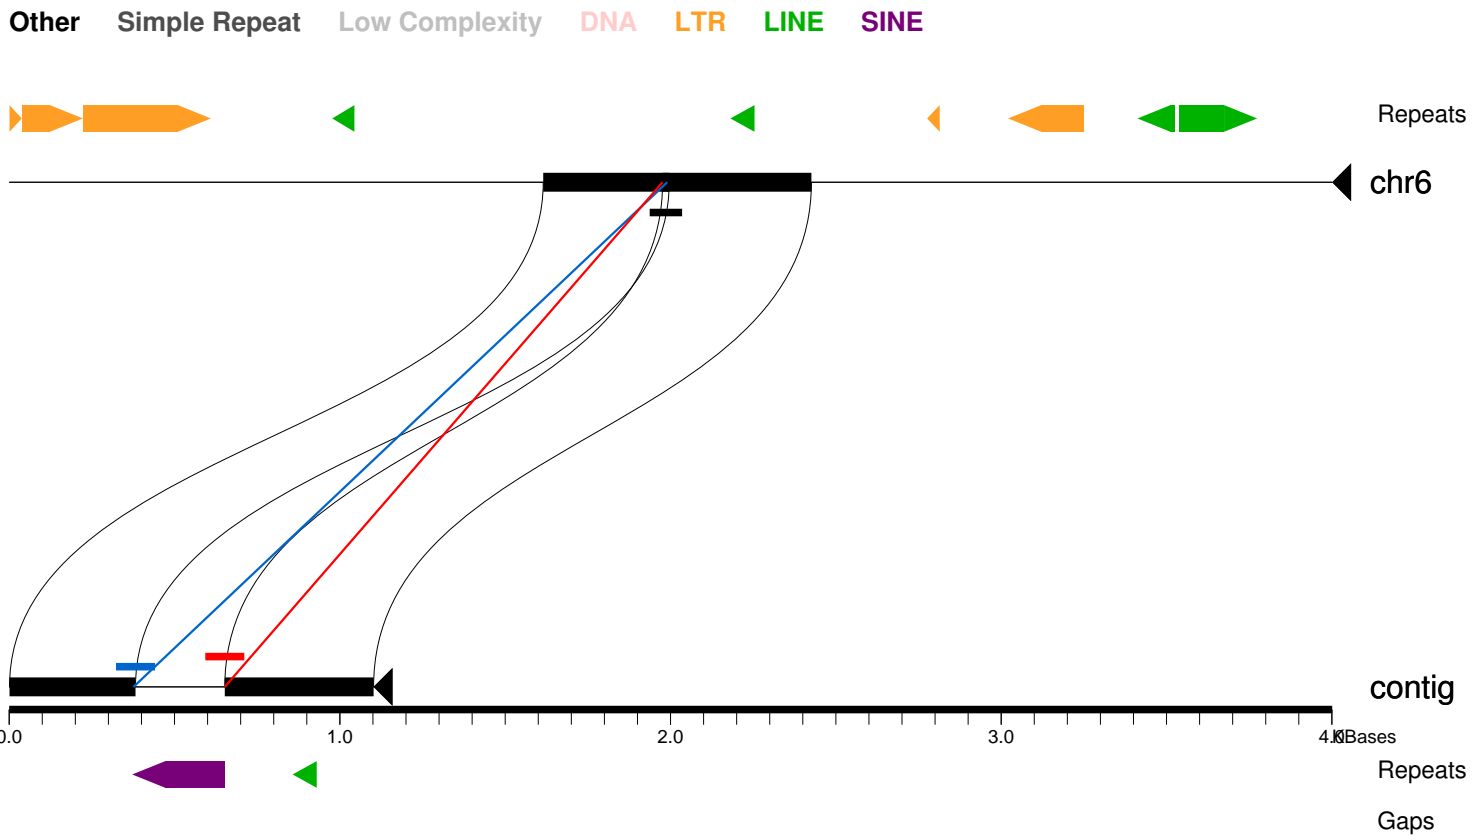

siteID: chr6\_165439447 Scafftig4 + Breakpoint: chr6:165439457

chr6:165439407-165439516

Overlap Length: 10 INS size: 372 Genotyped: No

```
left  TAGACCTTATTTAGATTTAAGATATATGGAACTTC-----TTTGAAAATGTTTCAT----TAAACATGTAN
chrom TAGACCTTATTTGGATTTAAGATATATGGAACTTC-----TTTGAAAATGTTTCAT----TAAACATGTAA
right CCACCCGCCTCGGCCTCCCAAAGTGCTGGGATTACAGGCGTGAGCCACCGCGCCCGGCC-TAAACATGTAA
      1111**111*11211*111*1*1111***1*1*1*11111*11*11*11*11*111111******2
```

```
left  NNNNNNNNNNNNNNNNNNNNNNNNNNNNNNNNNNNNNNNNNNNNNNNNNNNNNNNNNNNNNNNNNNNNNNNNN
chrom TTCTAAAAAATTGAGTAGTCACTGCTGGCTAGCTATGATGGAGCAATACG-----
right TTCTAAAAAATTGAGTAGTCACTGCTGGCTAGCTATGATGGAGCAATACG-----
      22222222222222222222222222222222222222222222222222222222222222222222
```

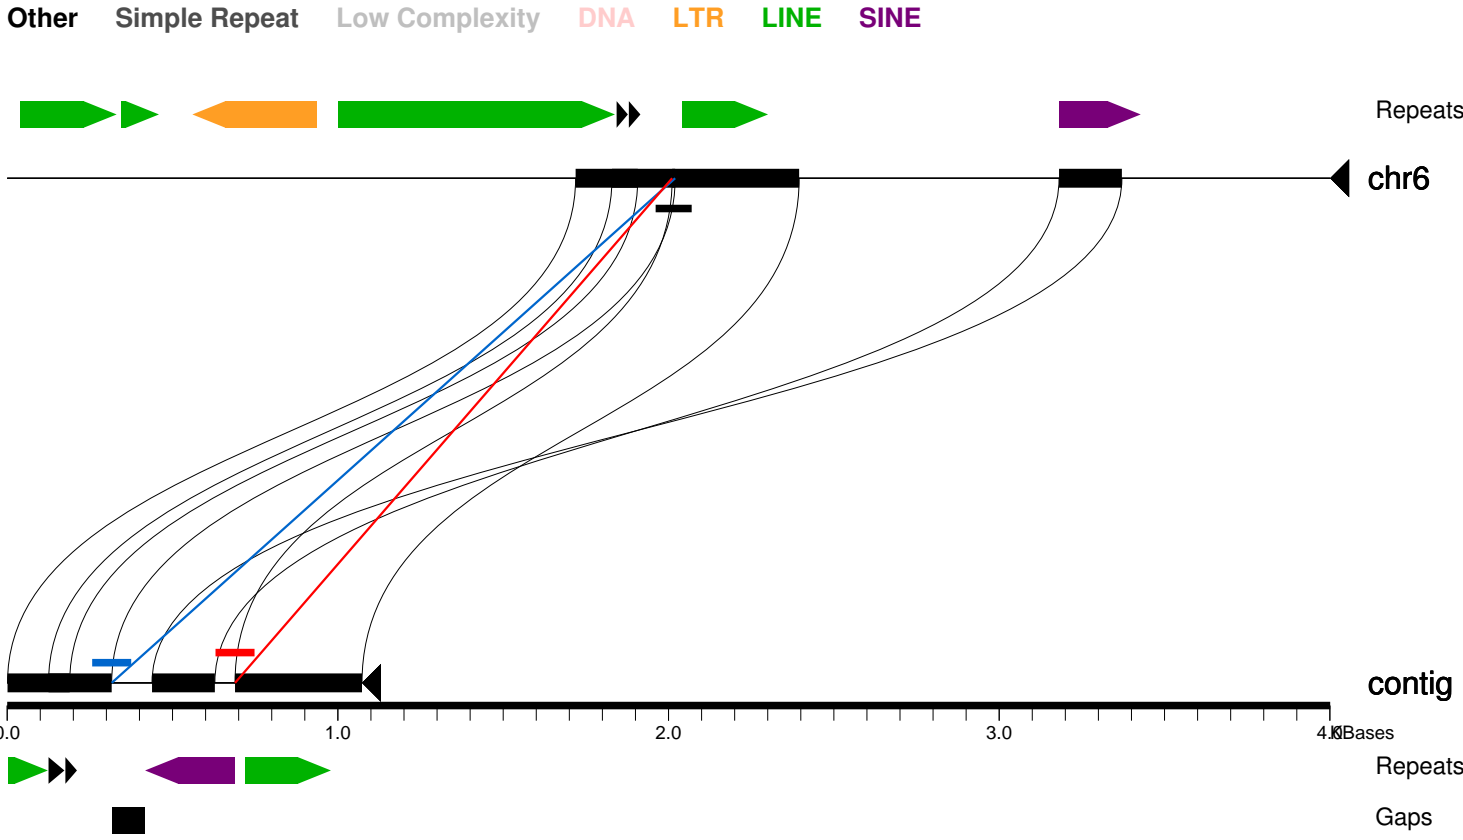



siteID: chr6\_167124808 Scafftig2 + Breakpoint: chr6:167124801

chr6:167124641-167124972

Overlap Length: 12 INS size: 307 Genotyped: Yes

left -----GGAGGCCACAGAGGGAGCTGGAGCCTCCACCCCCACAAAGCAGGAATAGCCCCACAAC  
chrom CTTGGGATTAGTGGAGGCCACAGAGGGAGCTGGAGCCTCCACCCCCACAAAGCAGGAATAGCCCCACAAC  
right A---GGAGAA-TGGCGTGAACCCGGGAAGC-GGAGCTTGCAGTG-----AGCCGAGATTGCGCCAC---  
N 222NN2 2\*\*1\*111\*\*111\*\*1\*\*\*1\*\*\*\*\*1\*1\*\*111111111\*\*1\*11\*\*1\*\*1\*\*\*\*111

left TTCCTTCATTGCAGTAATGAGGTGGTGCCECAATTCCTAGGTTGGAGTCAC-GTGAGACCCAGTCTGTT  
chrom TTCCTTCATTGCAGTAATGAGGTGGTGCCECACTTCTAGGTTGGAGTCAC-GTGAGACCCAGTCTGTT  
right -----TGCAGT-----CCGCAGT-CCGGCCTGGGCGACAGAGCGAGACTCCGTCTCAA  
1111111111\*\*\*\*\*111111111111111\*\*1\*\*N\*1\*\*1111\*1\*\*1\*1\*\*11\*1\*\*\*\*\*1\*1\*\*\*\*111

left AAAACAGAAAAGCTTATATAAGATCCAGAGTCTCGG--CCGGGCGCG-----GT---GGCTCACGCCTGT  
chrom AAAACAGAAAAGCTTATATAAGATCCAGAGTCTCATAACATAGTGCCCCAAAAGTCTAGGTTCCAATTTAA  
right AAAAAAAAAA---AAAAAAATCCAGAGTCTCATAACATAGTCCCCAAAAGTCTAGGTTCCAATTTAA  
\*\*\*\*1\*1\*\*\*1111\*1\*1\*\*1\*\*\*\*\*\*2222\*222\*21\*2222222\*222\*2\*\*22222\*22

left AATCCCAGCACTT-TGGGAGGCCGAGGCGGTTGGATC-----ATGAGGTCAGG---AGA  
chrom AAAAAAATCACTAATTACACAAAAGAACCAGGAAGATCTCAAAACAGAAAAAAAAAAGATGCCAAACCAAGA  
right AAAAAAATCACTAATTACACAAAAGAACCAGGAAGATCTCAAAACAGAAAAAAAAAAGATGCCAAACCAAGA  
\*\*2222\*2\*\*\*\*22\*222\*2222\*\*22\*2\*\*22\*\*\*\*2222222222222222\*2\*\*2\*2\*\*22222\*\*\*

left TCGAGACCATCTGGCTA-----ACAAGG---TGAAACCCCGTCTCTACTAAA  
chrom T-GACAGAATGTTAGATATATCTGACAAAAGATTTCAAAGCAGCCATGATAAAAA  
right T-GACAGAATGTTAGATATATCTGACAAAAGATTTCAAAGCAGC-----  
\*2\*\*2\*22\*\*22\*2\*2\*\*222222\*\*\*\*2\*222\*2\*\*\*2\*222NN1NNNNN111

Other Simple Repeat Low Complexity DNA LTR LINE SINE

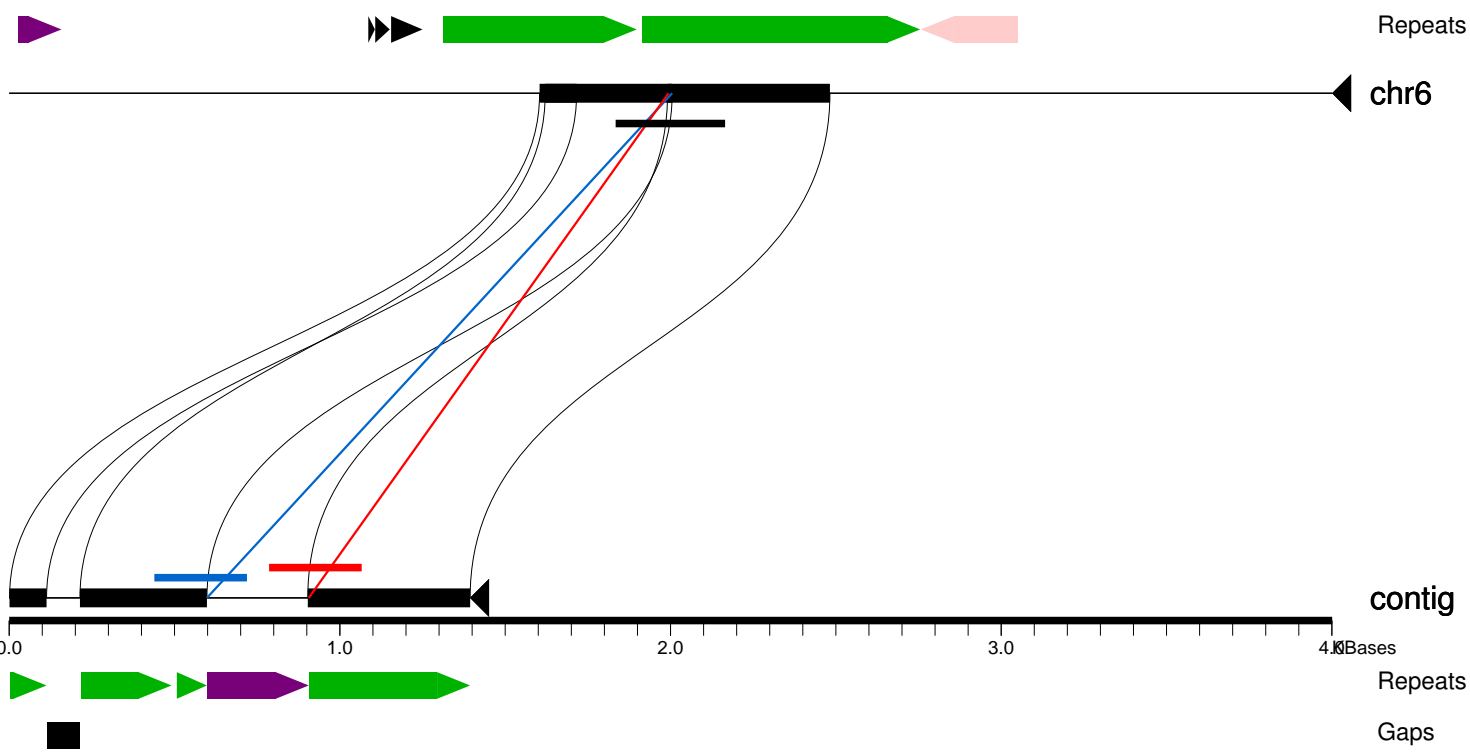



siteID: chr6\_1674195 Scafftig2 + Breakpoint: chr6:1674194

chr6:1674034-1674366

Overlap Length: 13 INS size: 133 Genotyped: Yes

```
left -----CATGGCTTGATA
chrom TTTTCAGACTGGCTTCTTTTCATTTAGCGACATACATTTAAGGTTCTCCATGGCCTTTCATGGCTTGATA
right TTTTTTTTTTTTTTTTTTTTTTTTTTTT-----TTTTTTTTTAGTAGAGAC---GGGTTTTACCG--TGTTA
2222NNNNN2NNN22N222NN222N 2NNN222N22NNNNN2 22NN222**11*11**1**

left GCTCATTTCTTTTATCACTGAAGAGCATTCCATTGGATGAACGTACCAGAAGTTGATCCATTAGAAGGA
chrom GCTCATTTCTTTTATCACTGAAGAGCATTCCATTGGATGAACGTACCAGAAGTTGATCCATTAGAAGGA
right GCCAGGATGGT-----CTCGATCTCCTGACCTCG--TGATCCGCC---GTCTCGGCCTCCCAAAG-
**11111*11*1111111**11*111*1*11*1*1*11**1*111*1111**11111*1*111**1*1

left TGCTTGCTTGCTTCCAGTTAGGTTGATTATTTTTTTTTTTTTTTTTTTTTTTTTTTTTTTTTTTTTTTT
chrom TGCTTGCTTGCTTCCAGTTAGGTTGATTATAATAATGCTGCTATAAACATCTATGCGCAGGTTTTTT-
right -----TGCTGG-----TAGGTTGATTATTAATAATGCTGCTATAAACATCTATGCGCAGGTTTTT-
11111****1*1111111111******22*22*22*22*2*22222*2*2*222222*****2

left TTTTTTTTTAGTAGAGACGGGTTTTACCGTGTAGCCAGGATGGTCTCGATCTCCTGACCTCGTGAT--C
chrom -----CTGAG---GACATGTTTTCAAC---TTA-----ATTGGGTAAATA-CATAGCCGCGAGGTTGC
right -----CTGAG---GACATGTTTTCAAC---TTA-----ATTGGGTAAATA-CATAGCCGCAAGGTTGC
222222*2*2222***22*2*****2*222***222222**2*22*22*22*2*22*2*12*2*22*

left CGCCCGTCTCGGCCTCCCAAAGTGCTGGTAGGTTGATTATTAATAATGCTGCTA-----TAAACAT---
chrom TGATTGCGTAGTGAAACCATCGTGCTATTTATGAAATTGCAAACATTCGTGCAAAGTGCTCTAAACCTTTT
right TGATTGCGTAGTGAAACCATCGTGCTATTTATGAAATTGCAAACATTCGTGCAAAGTGCT-----
2*222*22*2*2222***22*****22*222222***222*2*2*22***2*22222211111N1

left ---
chrom GCA
right ---
```

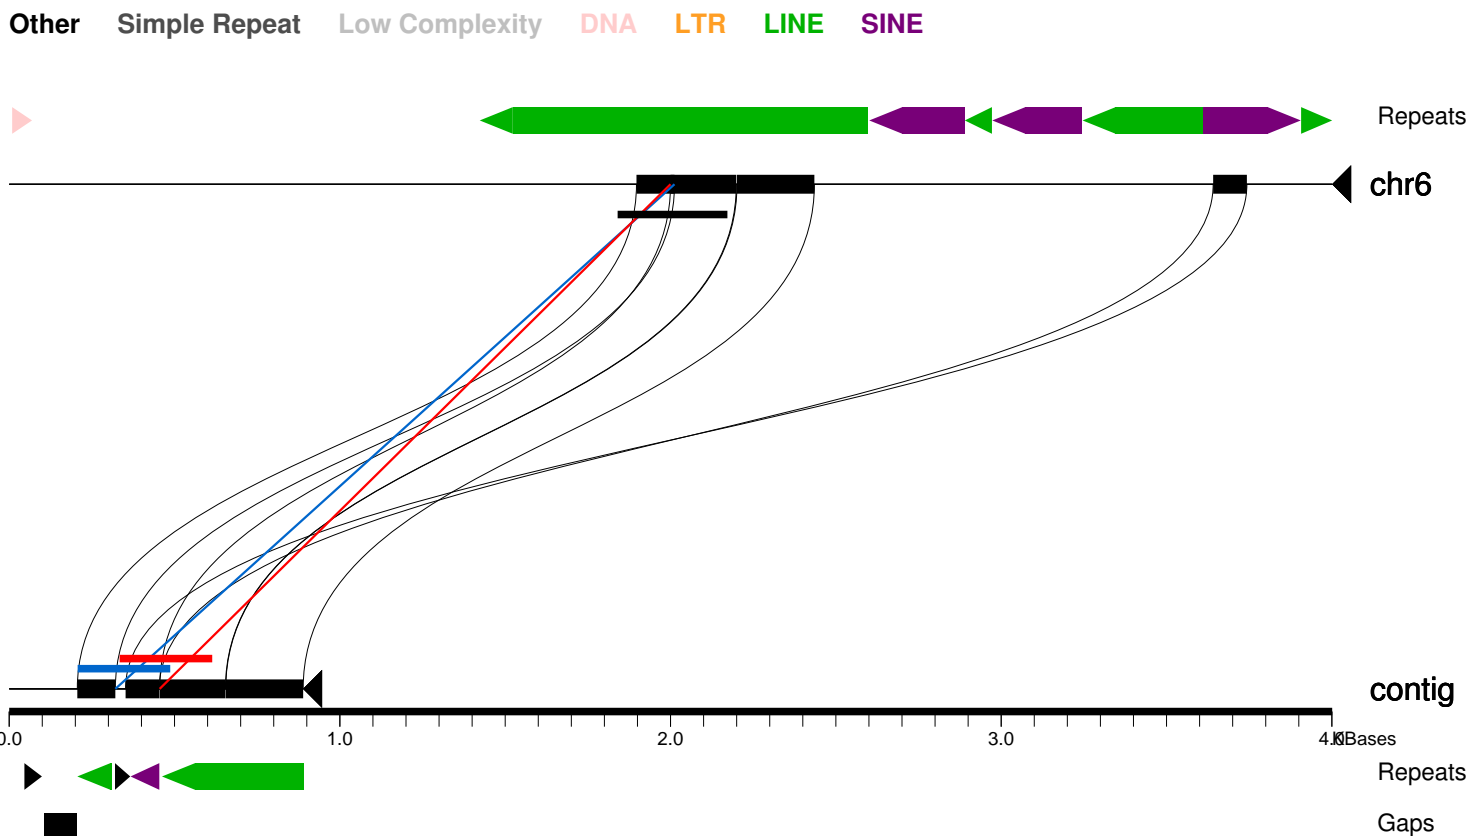





siteID: chr6\_19137101 Scaffitig7 + Breakpoint: chr6:19137094

chr6:19137054-19137153

Overlap Length: 16 INS size: 306 Genotyped: Yes

```
left  ACTTAATGACTG-----CAA-----GGGAGTAT--GAGGGAGTTTCTGTGTG----CTGTTTCTGTT
chrom ACTTAATGACTG-----CAA-----GGGAGTAT--GAGGGAGTTTCTGTGTG----CTGTTTCTGTT
right TCCACCCGCCTCGGCCTCCCAAAGTGCTGGGATTACAGGCGTGAGCCACCGCGCCCGGCCTGTTTCTGTT
      1*11111*1**11111111***111111***1**111*1*1***111*1*1*111111*****
```

```
left  TCTTTTTTTTTTTTTTTTTTTTTTTTTGAGACGGAGTCTCGCTCTGTGCGCCAGGCCGGACTGCGGACTGC
chrom TCTTTATTTGAGCGCTGGTTACATG-GA--TATACTCACTATATAAA-----AATTT
right TCTTTATTTGAGCGCTGGTTACATG-GA--TATACTCACTATATAAA-----AATTT
      *****2***222222*22**222**2**222*22***2**2*2*222222222222222222*2*22
```

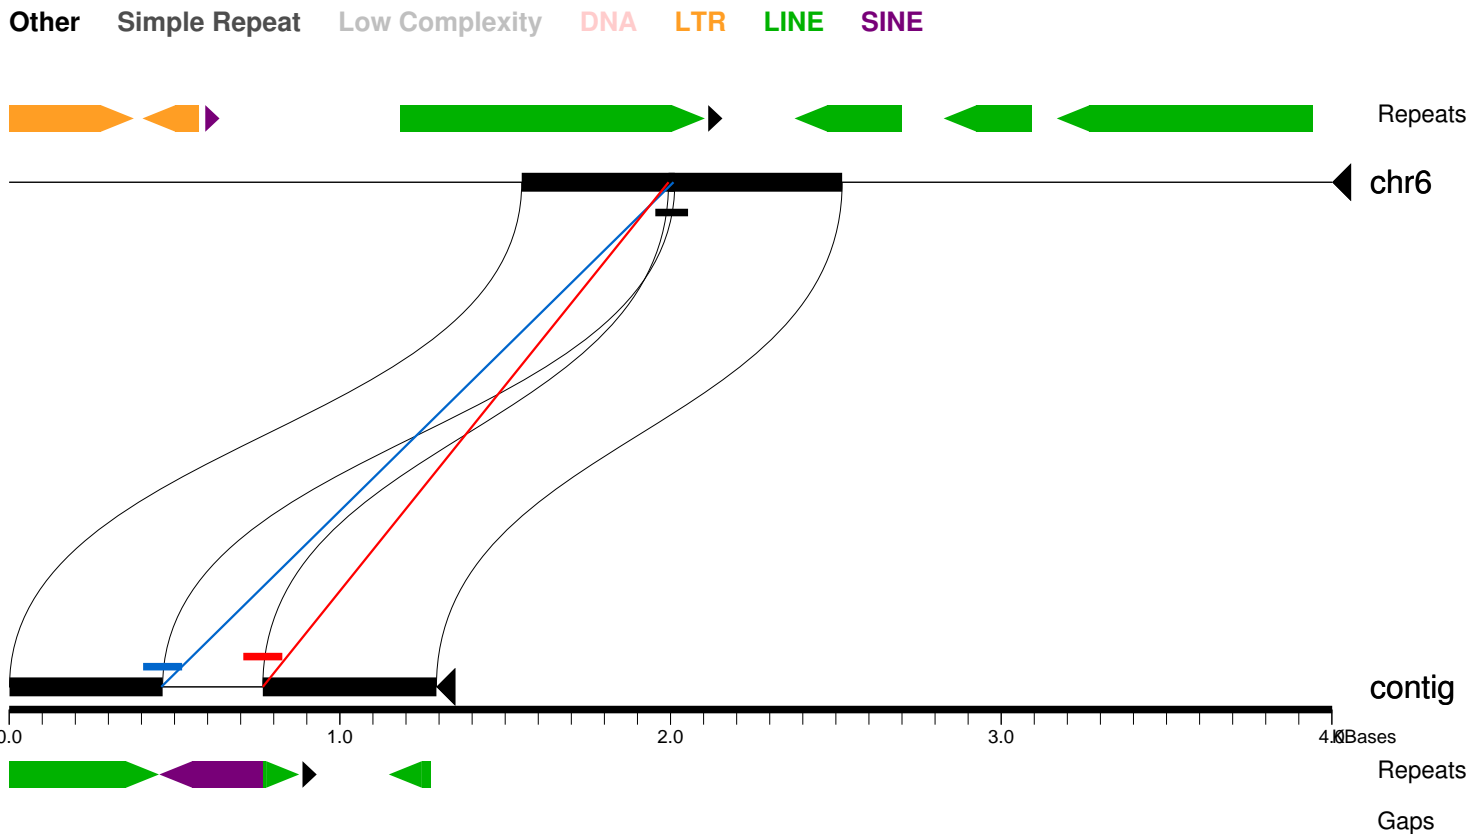



siteID: chr6\_23978150 Scaffitg19 - Breakpoint: chr6:23978344

chr6:23978302-23978403

Overlap Length: 14 INS size: 299 Genotyped: Yes

```
left AAATATCGTTGTCCAA-----GGAAACACTTCAAGATACTGTTACAG-----AAAAATGACAA
chrom AAATATCGTTGTCCAA-----GGAAACACTTCAAGATACTGTTACAG-----A AAAATGACAA
right CGCCACTGCAGTCCGCAGTCCGGCCTGGGCGACAGAGCGAGACTCCGTCTCAAAAAAAAAA AAAATGACAA
      1111*11*11****11111111111111111111**11***111*1***11*1**11**11111111******
```

```
left CCAGGCCGGGTGCGGTGGCTCAC-GCCTGTAATCCCAGCACTTTGGGAGGCCGAGGCGGGTGGATCA
chrom CCATGCC-----TACCCCATAGGCAGTTGT--GAGAATTTAATGAGAT-----GATGGATG-
right CCATGCC-----TACCCCATAGGCAGTTGT--GAGAATTTAATGAGAT-----GATGGATG-
      **2***22222222*22*2**22*2*2**22*222**2*2**222***222222222*2*****22
```

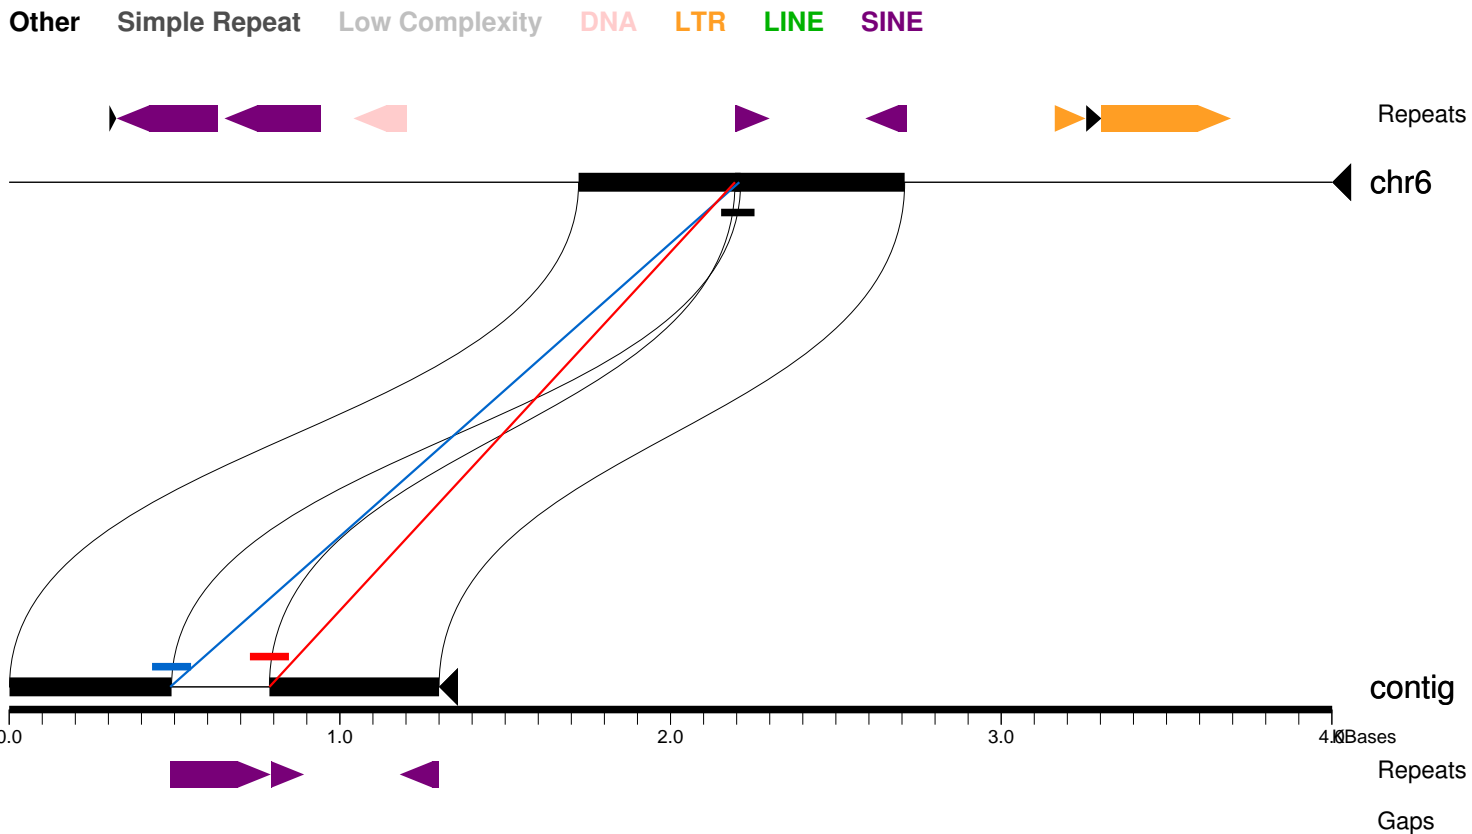

siteID: chr6\_25380209 Scaffitig1 + Breakpoint: chr6:25380225

chr6:25380177-25380283

Overlap Length: 12 INS size: 416 Genotyped: No

```
left  C-----TTCTTTATGCACTTTTTTTCTTTTCCTTTTCTTACCTC-CATGGAATTTATTCTGCT
chrom C-----TTCTTTATGCACTTTTTTTCTTTTCCTTTTCTTACCTC-CATGGAATTTATTCTGCT
right CCACCCGCCTCGGCCTCCCAAAGTGCTGGGATTACAGGCGTGAGCCACCGCGCCCGGCCT--ATTCTGCT
      *11111111111111111111**111*1*11**1111**11111*1*11111***1*1*11**11*11*****
left  CTTT-----TTTTNNNNNNNNNNNNNNNNNNNNNNNNNNNNNNNNNNNNNNNNNNNNNNNNNNNNNNNN
chrom CTTT-----AAGGACTCTCAAAGGCATAGTAGATCATGGCATAAAATTAGGTGGCAA
right CTTT-----AAGGACTCTCAAAGGCATAGTAGATCATGGCATAAAATTAGGTGGCAA
      ***222222222222222222222222222222222222222222222222222222222222222222
```

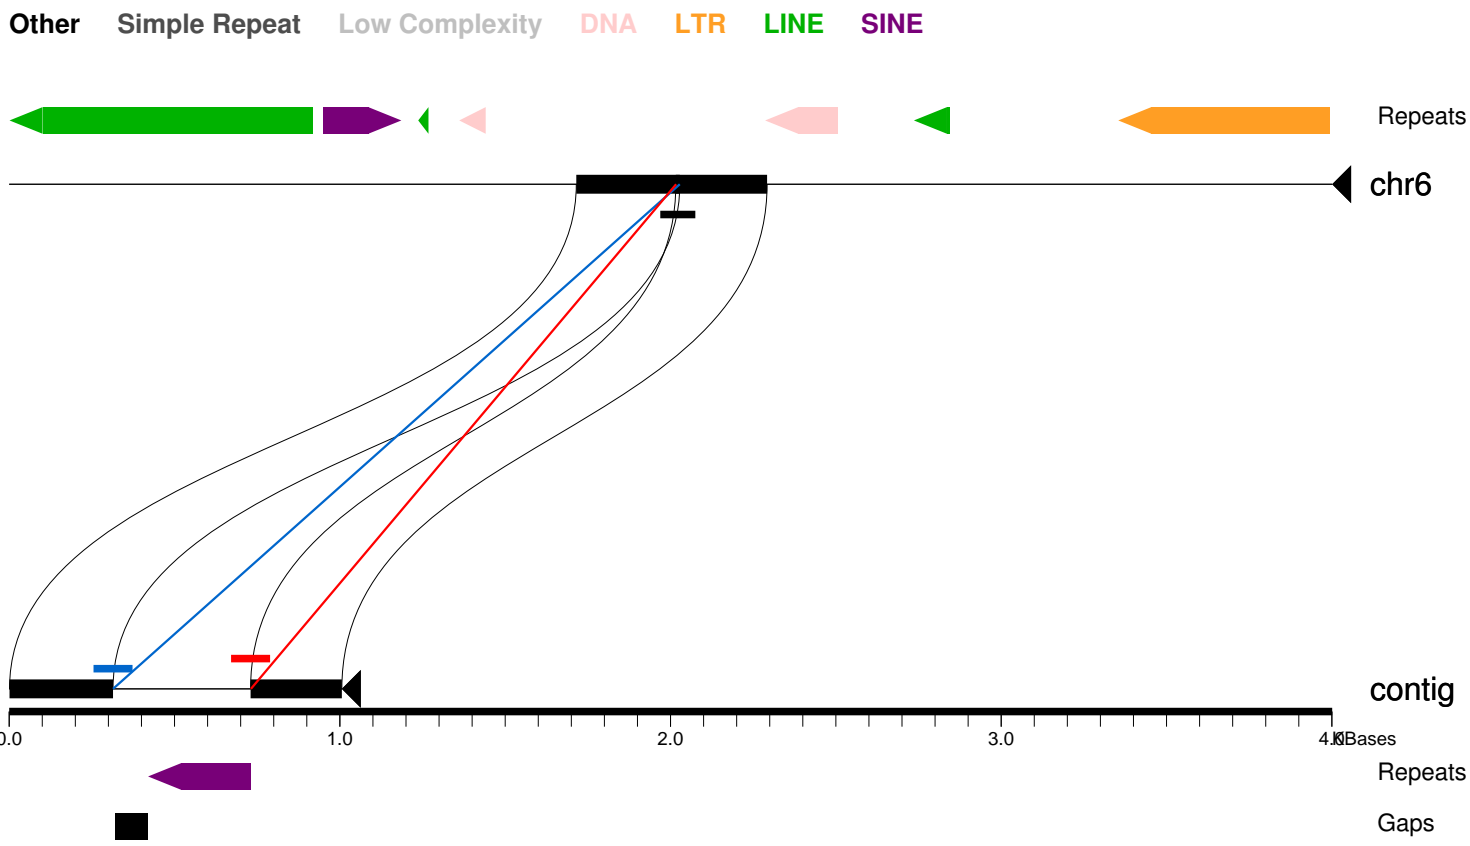

siteID: chr6\_26962169 Scafftig3 + Breakpoint: chr6:26962172

chr6:26962115-26962231

Overlap Length: 3 INS size: 116 Genotyped: Yes

```
left    C-----TGATTACTTCACTAGTTGG-TCTTTTCA-ACTTAACTTGTTCCTAATGAGATTAAATTCCTT
chrom   C-----TGATTAGTTCACACTAGTTGG-TCTTTTCA-ACTTAACTTGTTCCTAATGAGATTAAAATTCAT
right   TCGCCCAGGCTGGAGTGCAGTGGCGGGATCTCGGCTCACTGCAAGCTCCGCCTCCCGGG-----TTCAT
        111111111*1*11*2*1**1*1*11**1***111*11***11*11111111***111*1*1111111**2*

left    TTTTTTTTTTTTTTTTTTTTTTTTTTTTTTTTTTTTTTTTTTTTTTGGAGACGGAGTCTCGCTC-----TGTC
chrom   GCATAAATAACCAAACCAAAAAATTAAACC-----AAAAGAATACTCACCAGAAAGGATGT-
right   GCATAAATAACCAAACCAAAAAATTAAACC-----AAAAGAATACTCACCAGAAAGGATGT-
        222*222*22222222222222**22222222222222*2*2*2*22***2*222222222***2
```

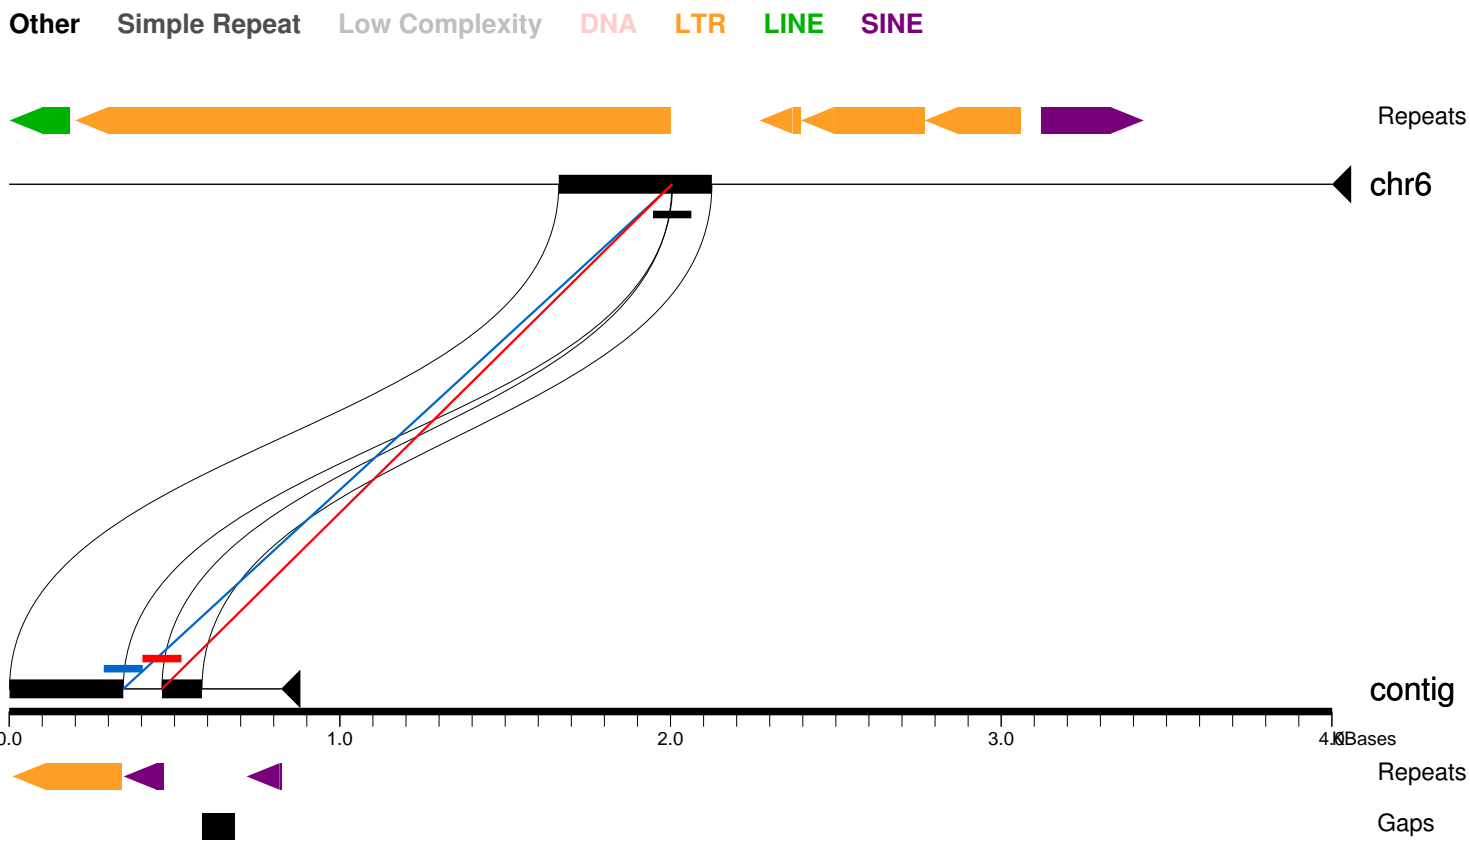



siteID: chr6\_28514323 Scaffitig1 - Breakpoint: chr6:28514337

chr6:28514292-28514396

Overlap Length: 15 INS size: 230 Genotyped: Yes

```
left  C-----TTTTTTTTTTGGCATATATGTGCACAAGTTTTACTGGGTATTAAAAATAAAGAGA
chrom C-----TTTTTTTTTTTGGCATATATGTGCACAAGTTTTACTGGGTATTAAATAAAGAGA
right CAGAGCGAGACTCCGTCTCAAAAAAAAAAAAAAAAAAAAAAAAAAAAAAAAAAAAAAAAAAATAAATAAATAAATAAAGAGA
      *11111111111111111111*1*1111111111111111*1*1*11*11*1**111111*1*111**111*****
```

```
left  ATAAAGGTGAAACCCCGTCTCTACTAATAAATAACAAAAAATTAGCCGGGCGTGGTGGCGGGCGCC
chrom ATAAATCGATTTTTAATGTTTGCTGACAGCTTTCAAAA---CC---CATTATT-----CT
right ATAAATCGATTTTTAATGTTTGCTGACAGCTTTCAAAA---CC---CATTATT-----CT
      ***222**2222222*2*2*2**2*2*222222*****2222**222*2*22*2222222*2
```

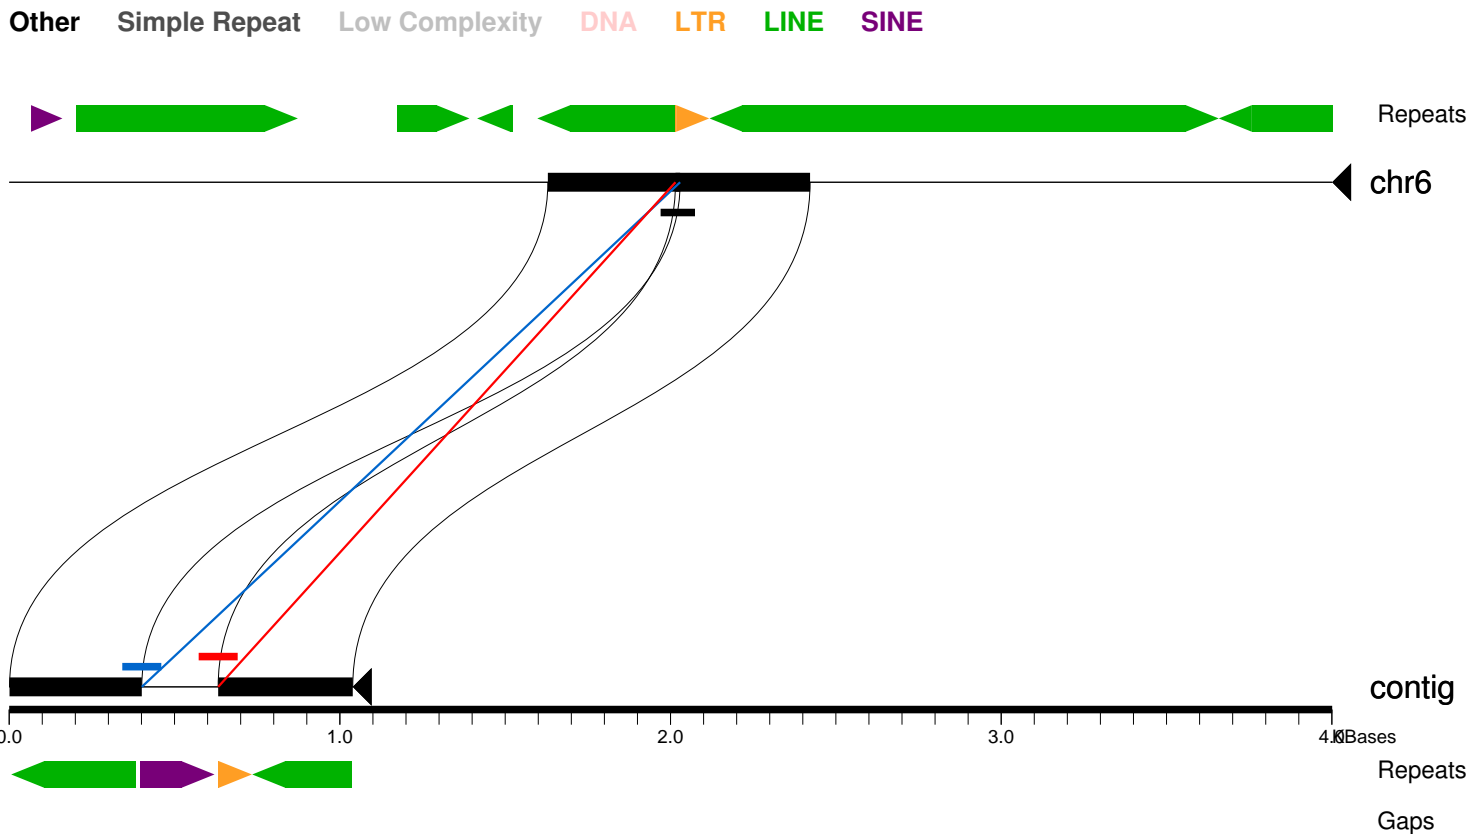

siteID: chr6\_29680466 Scaffitg2 - Breakpoint: chr6:29680453

chr6:29680413-29680512

Overlap Length: 16 INS size: 140 Genotyped: Yes

```
left  AGGGTTATTGTAAGTACCTGACCTGCCCTCT-----ATAGTATAGTCTTAAGAGATCTGA
chrom AGGGTTATTGTAAGTACCTGACCTGCCCTCT-----ATAGTATAGTCTTAAGAGATCTGA
right CCTGGACGACAGAGCGAGACTCCGTCTCAAAAAAAAAAAAAAAAAAAAAAAAAAAAAAAAAAAGAGATCTGA
      111*111111111*11**1111**1***11111111111111111111111111*1*11*1*111111*****
```

```
left  AGAACTTGGGAGGCTGAGGCAGGAGAATGGCGTGAACCCGGGAGGCGGAGCTTGCAGTGAGCCGAGAT
chrom AGAACTTGGCATCCTAT-----AGAATGG--TAAATC-----AGCTTATT--TCATCAACAAC
right AGAACCTGGCATCCTAT-----AGAATGG--TAAACC-----AGCTTATT--TCATCAACAAC
      ****2***2*22**22222222*****22*2*N*2222222222*****2222*2*2*2222*2
```

Other Simple Repeat Low Complexity DNA LTR LINE SINE

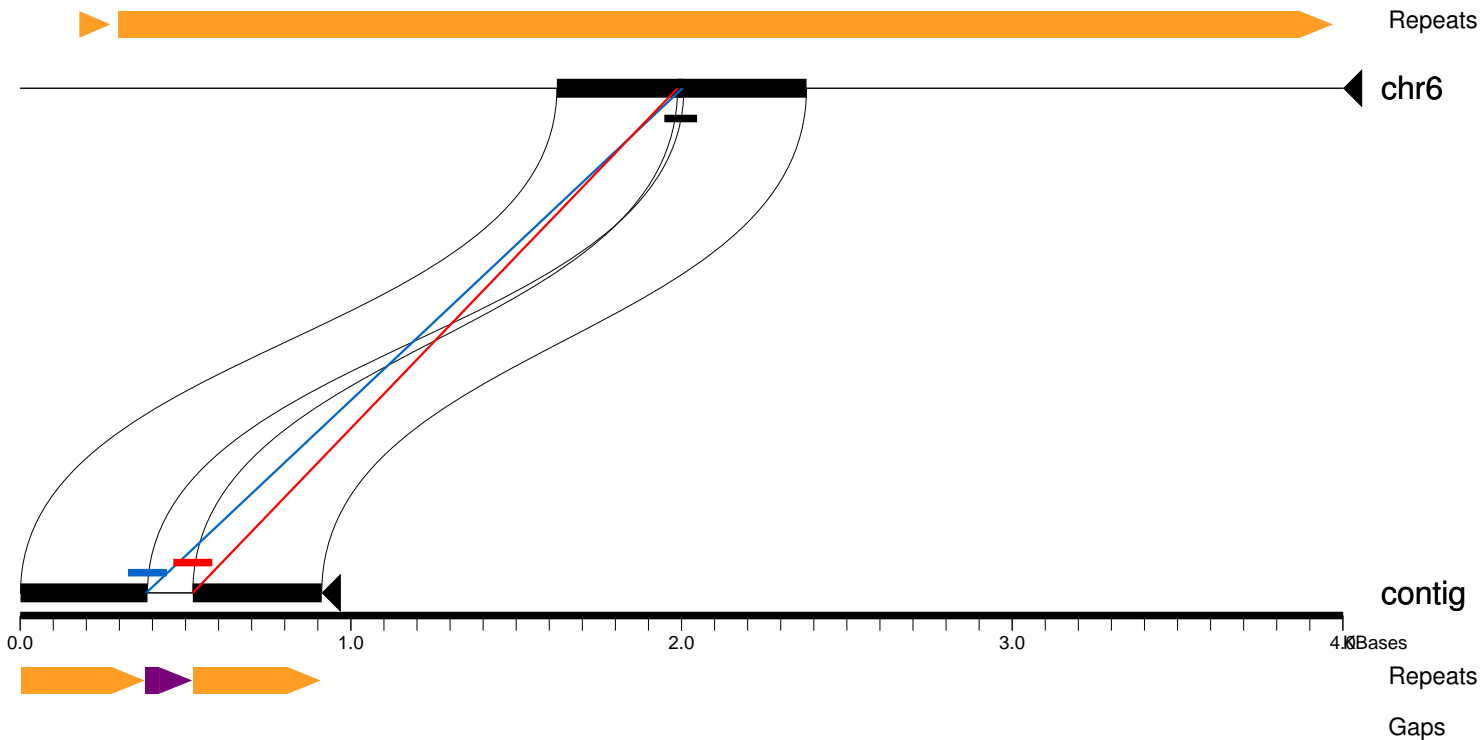

**siteID: chr6\_29818870 Scafftig4 - Breakpoint: chr6:29818857**

**chr6:29818813-29818909**

**Overlap Length: 16 INS size: 311 Genotyped: Yes**

```
left  AAT-----GACA-----ACTTTGTTT-----ACAATGATAAAGGGCTAACCAAAATATAAAA  
chrom AAT-----GACA-----ACTTTGTTT-----ACAATGATAAAGGGCTAACCAAAATATAA  
right CCGACCTGGGCGACAGAGCGAGACTCCGTCTCAAAAAAAAAAAAAAAAAAAAAAAAAAAAAAAAAA  
111111111111***11111111***11**1*11111111**1**11*1***11111**11****1*1***
```

```
left  ACACTTAAACAATGTGGCTCACGCCTGTAATCCCAGCACTTTGGGAGGCCGAGGCGGGTGGATCATGAGGT  
chrom ACACTTAAACAAT-----AAAACAGCA-TGTATAA-----ATGTGTATGTGACATCAACC  
right ACACTTAAACAAT-----AAAACAGCA-TGTATAA-----ATGTGTATGTGACATCAACC  
*****2222222222222222*222*****2*2*222*22222*2*2*22**222***2*222
```

```
left  C  
chrom C  
right C  
*
```

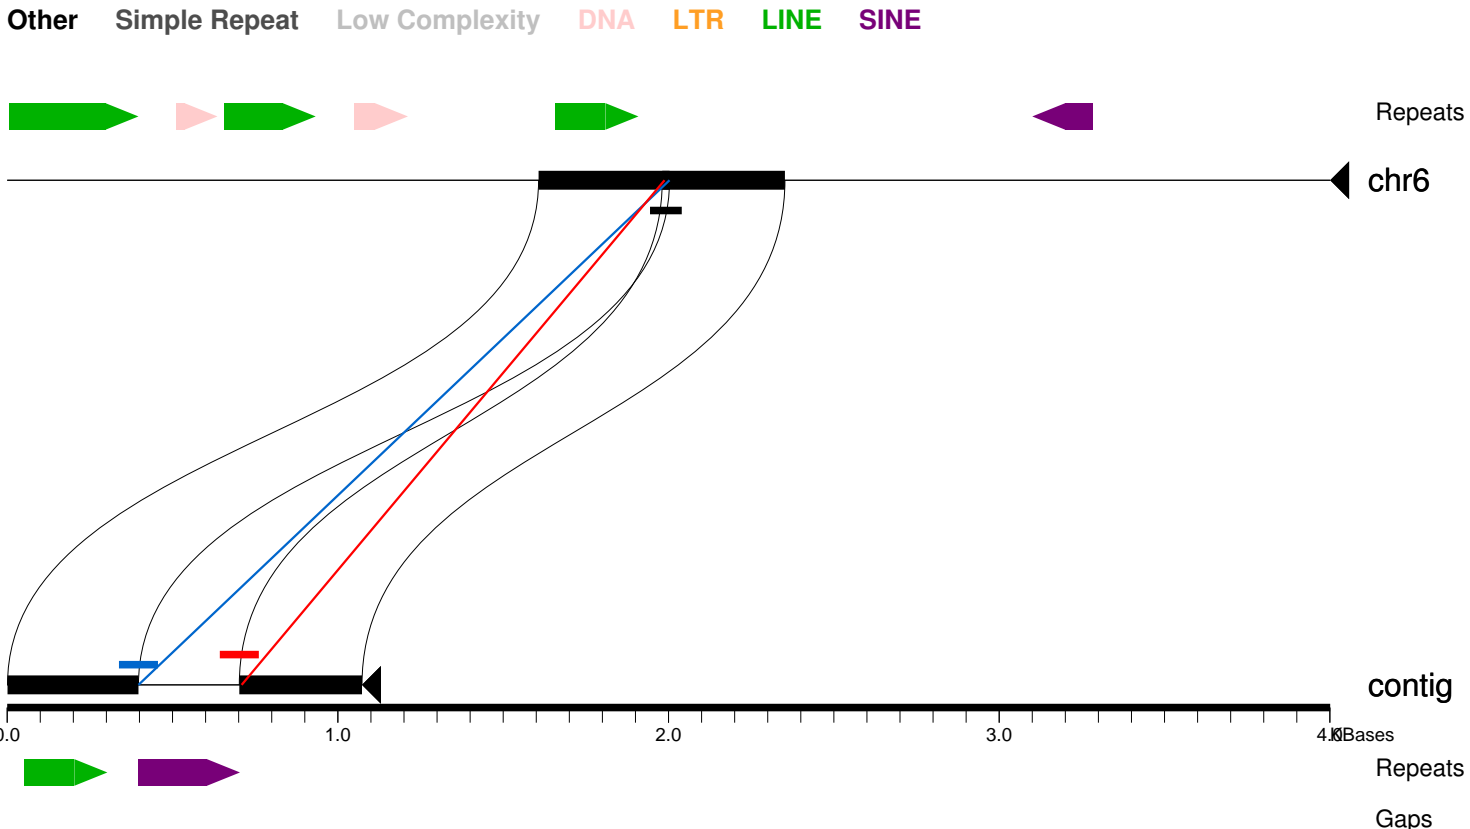

siteID: chr6\_31296802 Scaffitg3 + Breakpoint: chr6:31296783

chr6:31296623-31296958

Overlap Length: 16 INS size: 328 Genotyped: Yes

```
left -----TAGGCCTTGGTTCAAGTACAAGAACATAGAATGTGTTTATTCTTTACTGTATGT
chrom AGGCAGACTACGAGTTAGGCCTTGGTTCAAGTACAAGAACATAGAATGTGTTTATTCTTTACTGTATGT
right -----TTTTAGTAGAGCGGGTTTTACCATGTTAGTCAGGATGGTCTCGATCTCCTGAACTCATGA
      2NNN222111*1*11****11*11*1111*11111**11**1*11**1*N1*1*1111***1
```

```
left AACAACTACTTGGAGCACAATAAAGAATCATTAGTAAATTAGAAGATTTGTTAGTATGAAGAGTAAGGGA
chrom AACAACTACTTGGAGCACAATAAAGAGTCATTAGTAAATTAGAAGATTTGTTAGTATGAAGAGTGAGGGA
right TCCACCTGCCTC-AGCCTCCCAAAGTGT--TGGG---ATTACAGG---TGTGAGC-TGCTGCGCCCGG--
      11**1**1*1*11***11111****12*11*11*111****1*1*111***1**11**1*1N1**11
```

```
left AACTTAAAGAAAAGATTTTAAAGAGGAACTATCTTCTTT----TTTGT---TTGTTTTTGTGTTGTTGTT
chrom AACTTAAAGAAAAGCTTTTAAAGAGGAACTATCTTCTTTAACACTTATGT---TAAACCAAAAAGGAAAACCT
right --CT-----GAGGAACTATCTTCTTAAACTTATCATTCTTAAACCAAAAAGGAAAACCT
      11**111111111N1111111*****22222**2*11111*N2222222222222222**
```

```
left TTGAGACAGAGTCTCACTCTGTAG-----CCCAGACTGGAGTG--CAGTGCGCAATTTAGGCTCACTGC
chrom TGGAGAGGAACTTTTATTCTTTACAGCTTCCCCCTCTTGATTTTACAGTTCTTCCCTCTTCAAATCTCCTT
right TGGAGAGGTACTTTTATTCTTTACAGTTCCCCCTCTTGATTTTACAGTTCTTCCCTCTTCAAATCTCCTT
      *2****22N*2*2*2*2***2**222N22***222**2*2*222****222*222**222**2*222
```

```
left AAC-----CTCCGCCT---CCG-----GGG---CTCAAGCGATTCT
chrom AACATATCTTTAGTTTGTACTCTTCTTAATCAGTTAGAAGGGACAACCTTATCCGAGTA-
right AACATATCTTGATTTTGTNNNNNNNNNNNNNNNNNNNNNNNNNNNNNNNNNNNNNNNNNNNNNNNNNNNN
      ***222222N2N222222N111NN1N1NNN1N1NNNNN 111 11N1NN111N1N2
```

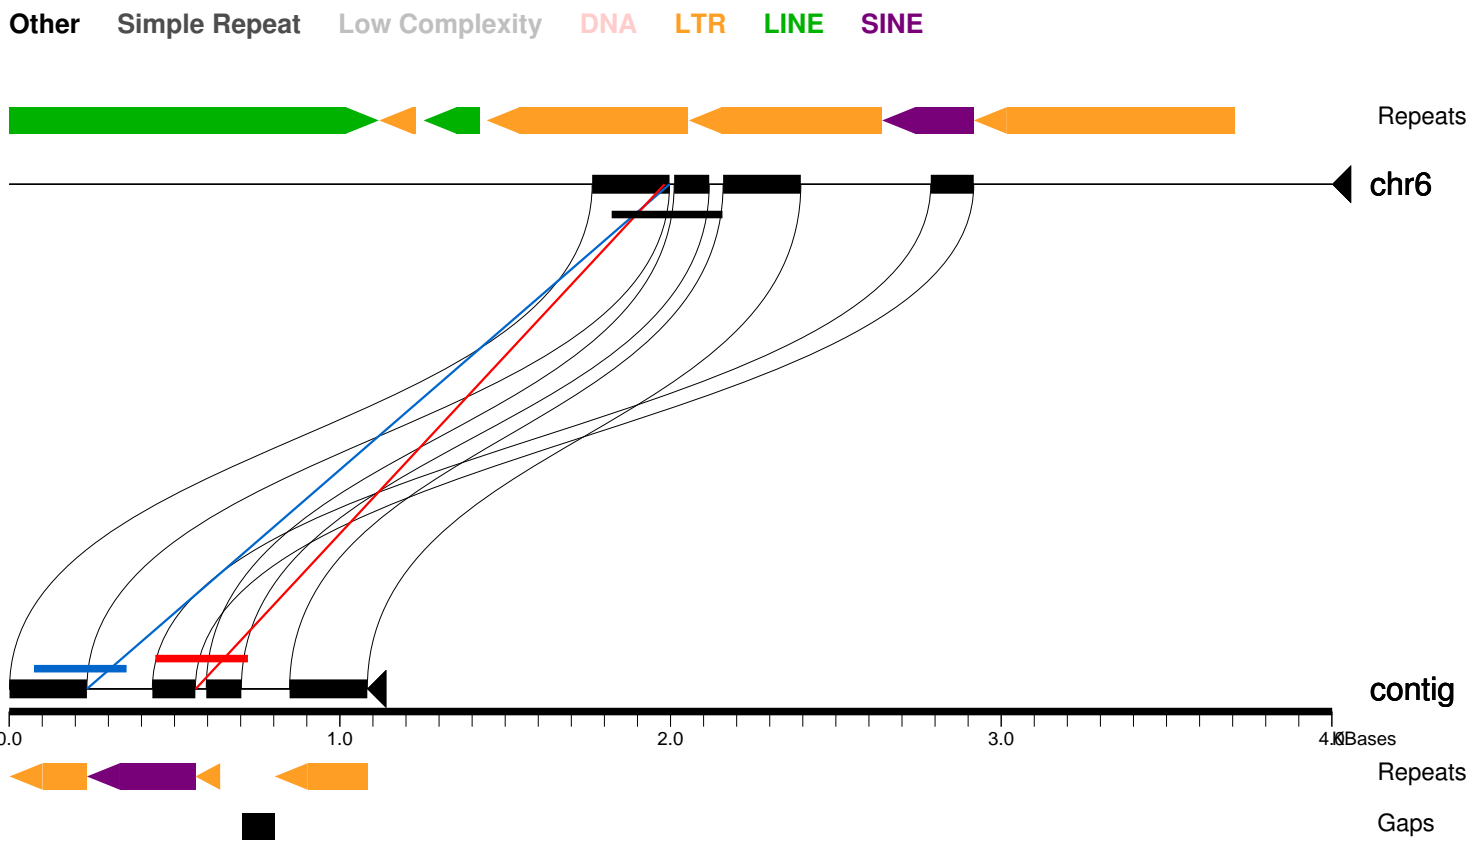

**siteID: chr6\_32687168 Scafftig6 + Breakpoint: chr6:32687154**  
**chr6:32687113-32687214**  
**Overlap Length: 14 INS size: 301 Genotyped: Yes**

```

left      GTTTGTCTTTTACTTGA--TGCTGAAATCA-AGAAGTCTTT-----TAAAAAATAATT
chrom    GTTTTGCCTTTTACTTGA--TGCTGAAATCA-AGAAGTCTTT-----TAAAAAATAATT
right    GCCC-GCCTCGGCCTCCC AAAAGTGCTGGGATTACAGGCGTGAGCCACC GCGCCCGGCC TAAAAAATAATT
          *1111*2**1111*1*111*11*****11**1*1**11**111111111111111111*
  
```

```

left      TTTTTTTTTT-TTTTTTTTTTTTGAGACGGAGTCTCGCTCTGTCGCCCAGGCTGGAGTGCAGTGGCG
chrom    TTCTTTTAAA-CTTT-----GAGTACAGCT-TTTCACT-AGGATTGCCAACA-TGATG
right    TTCTTTTAAA ACTTT-----GAGTACAGCT-TTTCACT-AGGATTGCCAACA-TGATG
          **2N***22212***222222222222222222***222***2*2**2*22***2*2*2222**2**22*
  
```

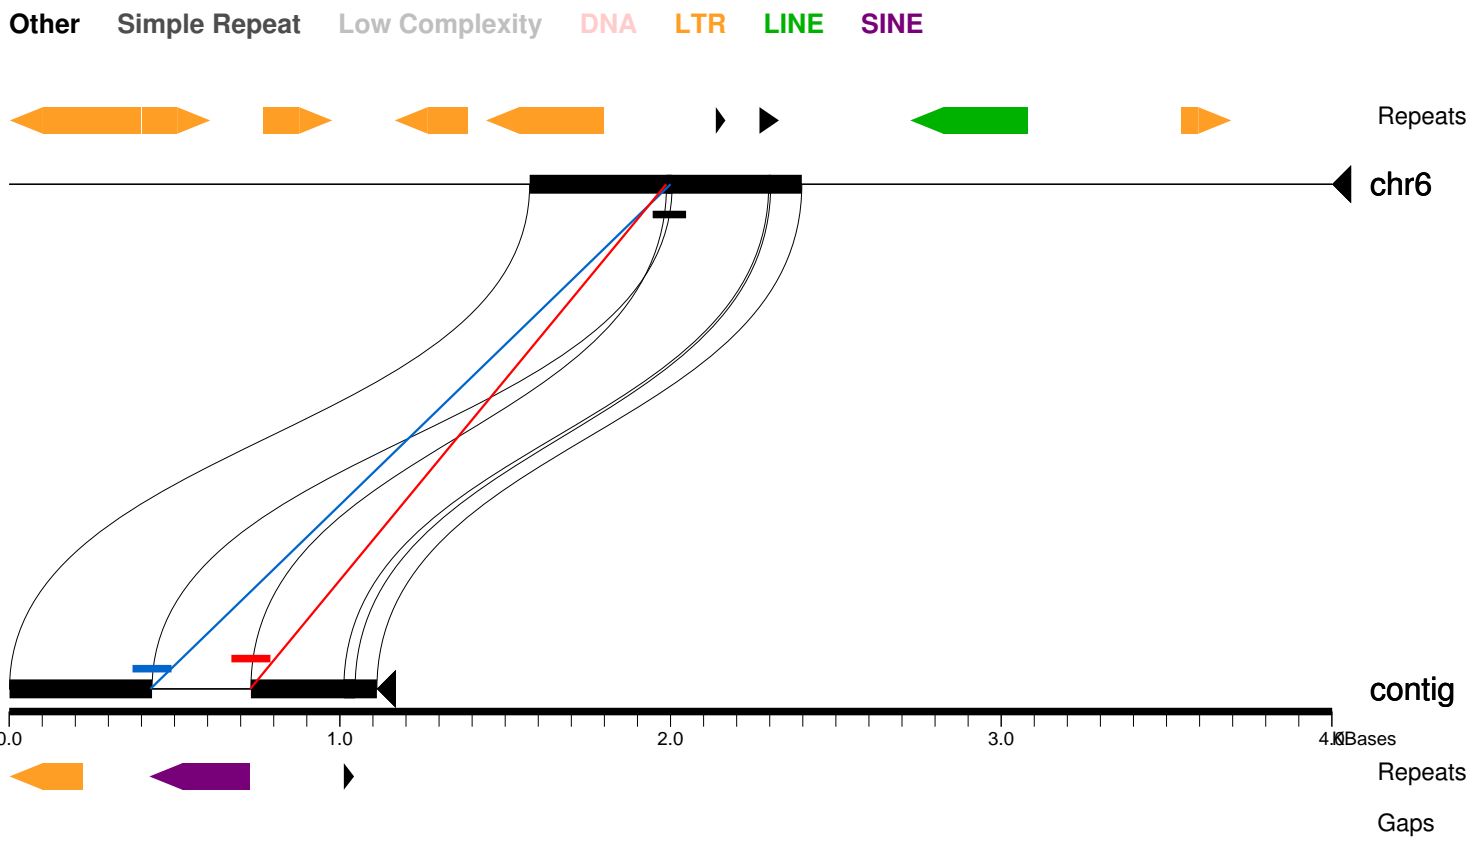

siteID: chr6\_32688601 Scaffitig3 - Breakpoint: chr6:32688579

chr6:32688536-32688638

Overlap Length: 17 INS size: 322 Genotyped: Yes

```

left   TTGGTGGTGGTGG-----TATATTAAGTAGAAAAGGTCTATTGGGCCTAAAAATATTG
chrom  TTGGTGGTGGTGG-----TATATTAAGTAGAAAAGGTCTATTGGGCCTAAAAATATTG
right  AGCGAGACTCCGTCTCAAAAAAAAAAAAAAAAAAAAAAAAAAAAAAAAAAAAAAAAAAA
111*1*11111*11111111111111111111*1*11**11*1****11111*111111111

```

```

left   ACATGTGGCCGGGCGCGGTGGCTCACGCCTGTAATC---CCAGCACTTTGGGAGGCCGAGGCGGGCGG
chrom  ACATGTA-----CATTATCTAT--TCTGTAATGATGCCATCCCT-----CCTAGTTTC-CAT
right  ACATGTA-----CATTATCTAT--TCTGTAATGAGGCCATCCCT-----CCTAGTTTC-CAT
*****222222222*22*22**22222*****22N2***2*2**22222222**2**22222*22

```

Other    Simple Repeat    Low Complexity    DNA    LTR    LINE    SINE

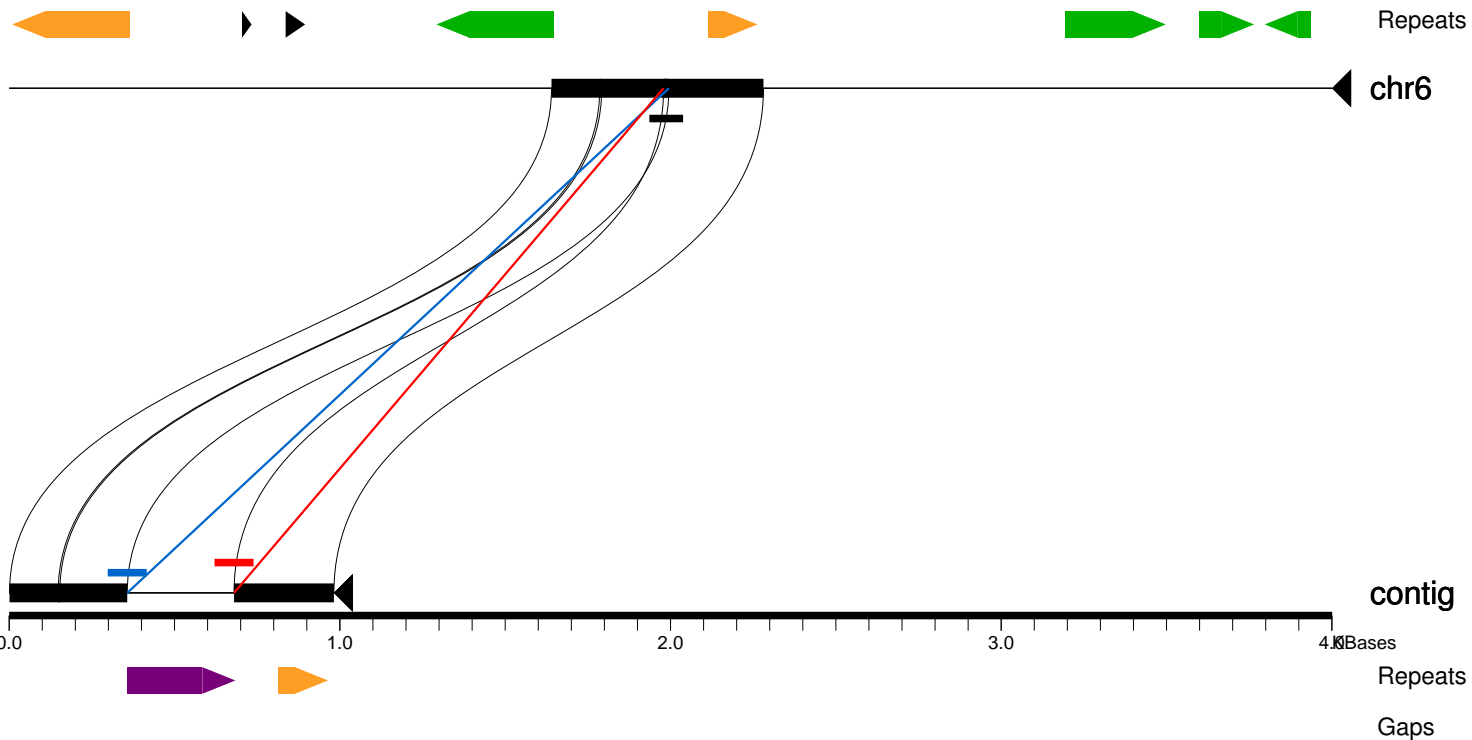

siteID: chr6\_32773389 Scaffold5 + Breakpoint: chr6:32773436

chr6:32773287-32773495

Overlap Length: 9 INS size: 310 Genotyped: Yes

```

left   CATTGGCTTGGTAGATTTTTCTCCATCTGTTTATTTTGATCCTATGTGTGTCACCTGCATGTGAGA--TGA
chrom  CATTGGCTTGGTAGATTTTTCTCCATCTGTTTATTTTGATCCTATGTGTGTCACCTGCATGCACACACATGA
right  -----TCCGCCCG-----CCT-----CGGCCTCCCAA-----
11111111111111111111111111111111111111111111111111111111111111111111 111
  
```

```

left   GTCTTTTGAAGACAGCATACTAATAGGCCTTGGTTCTTTATCCAGATTACCCTCTGTGCCTTTTAATTG
chrom  GTCTTTTGAAGACAGCATACTAATAGGCCTTGGTTCTTTATCCAGATTACCCTCTGTGCCTTTTAATTG
right  GTGCTGGGATTACAG-----CGTGAGCCA-----CCGTGCC-----
**11*11**11**11****111111111111111111111111111111111111111111111111111111
  
```

```

left   GGGCACTAGCC-ATTTACTTTT----TTTTTTTT-----TT
chrom  GGGCACTAGCCCATTTTACATTTAAGATTAGTATTGATATGTGTGGATTTTCATCCTGTCATCATGATGTT
right  -GGC-----CCCATTTACATTTAAGATTAGTATTGATATGTGTGGATTTTCATCCTGTCATCATGATGTT
1***111111*2*****2***2222**22*2**2222222222222222222222222222222222222**
  
```

**Other Simple Repeat Low Complexity DNA LTR LINE SINE**

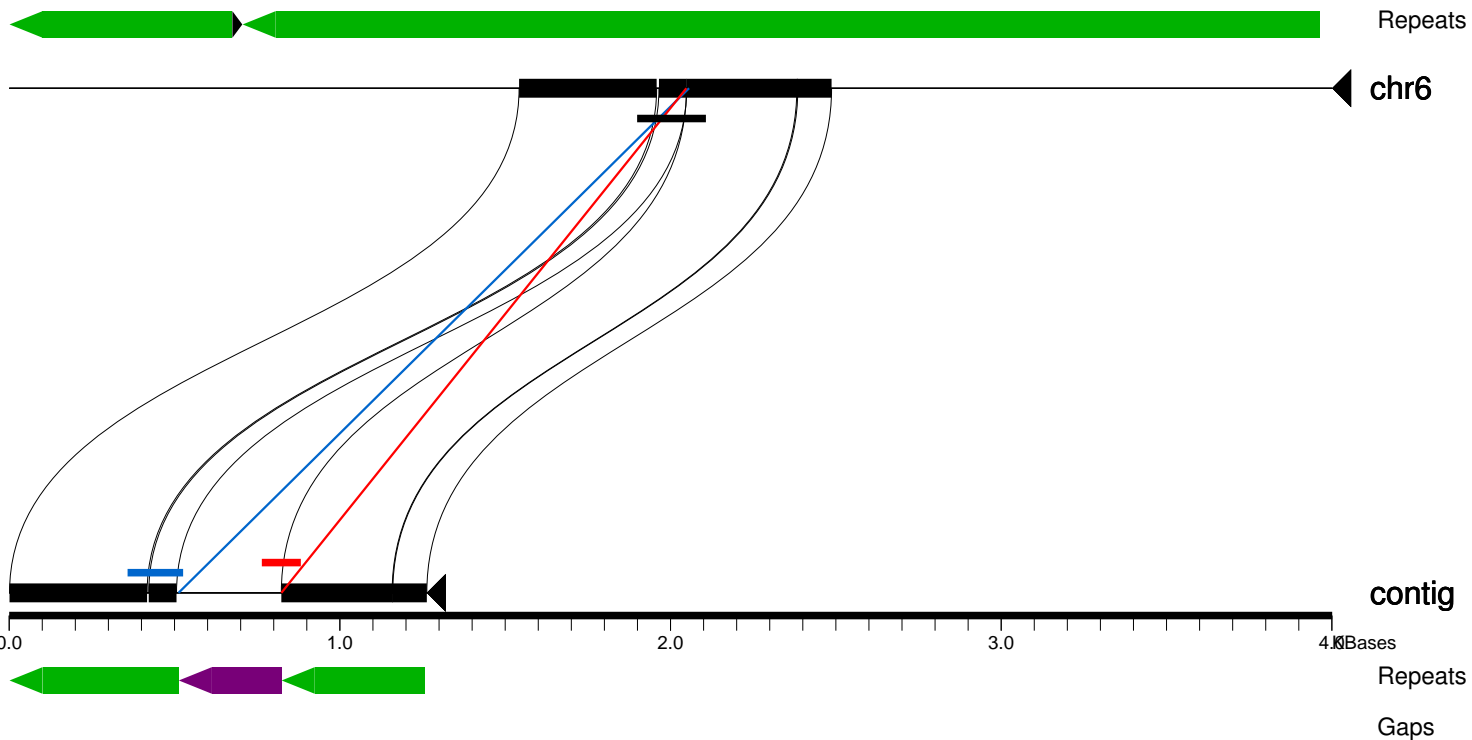







siteID: chr6\_39350742 Scaffitg10 + Breakpoint: chr6:39350733

chr6:39350688-39350792

Overlap Length: 15 INS size: 314 Genotyped: Yes

```
left  ATTATTACTGATGTTGAACATTGTTTTG----TATGTTTTTTGGCCACT-----TGTATGTCTTT
chrom ATTATTACTGATGTTGAACATTGTTTTG----TATGTTTTTTGGCCACT-----TGTATGTCTTC
right CCACCCGCCTCGGCCTCCCAAAGTGCTGGGATTACAGGCGTGAGCCACCGCGCCCGGCC**TGTATGTCTTC
      1111111*1111*11111**11*11*1111**111111*11*****11111111111**2
```

```
left  TTTTFFF---TTTTTTTTTTTTTTTTTTGAGACGGAGTCTCGCTCTGTCGCCAGGCCGACTGCGG
chrom TTTT*GAGAAGTGCTGTTCTGCTTTG-----CCCACTTTTAAATAGG--GTTCT----
right TTTT*GAGAAGTGCTGTTCTGCTTTG-----CCCACTTTTAAATAGG--GTTCT----
      ***222222*2*2*2**22*2*2***22222222222*2*2**2*22222***22*22**2222
```

Other Simple Repeat Low Complexity DNA LTR LINE SINE

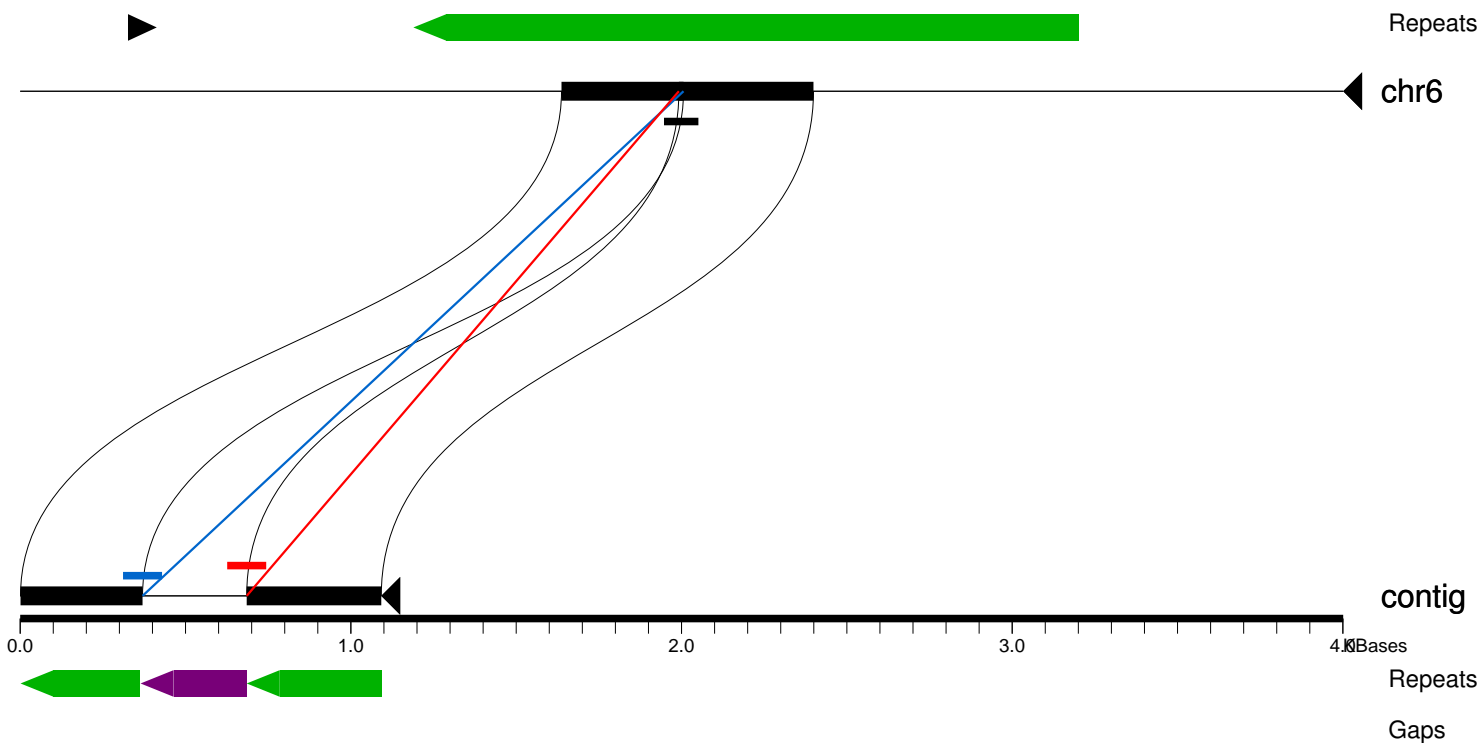

siteID: chr6\_40046901 Scaffitig3 - Breakpoint: chr6:40046895

chr6:40046850-40046954

Overlap Length: 15 INS size: 301 Genotyped: Yes

```
left   TTAGTGAAAGAAAAATGTTTTGGGGTGAGGTATTGCTTCTGTTTAG-----AAAGTAGTCT
chrom  TTAGTGAAAGAAAAATGTTTTGGGGTGAGGTATTGCTTCTGTTTAG-----AAAGTAGTCT
right  CT-GCACTCCAGCCTGGGCGACAGAGCGAGACTCCGTCTCAAAAAAAAAAAAAAAAAAAAAAA*AAAGTAGTCT
      1*1*111111*111*1111111*1*1*11*1*1*1***1111*11111111111111111******
```

  

```
left   GTAGAGGCCGGGCGCGGTGGCTCACGCCGTGTAATCCCAGCACTTTGGGAGGCCGAGGCGGGCGG
chrom  GTAGAAAT---GAAGAGAACATTTCGTCCCTTAAGGGCCAGGTAATTA-----CACAAAT
right  GTAGAAT---GAAGAGAACATTTCGTCCCTTAAGGGCCAGGTAATTA-----CACAAAT
      ***22222*22*2*22222**222***22*222***2222*222222222222*222222
```

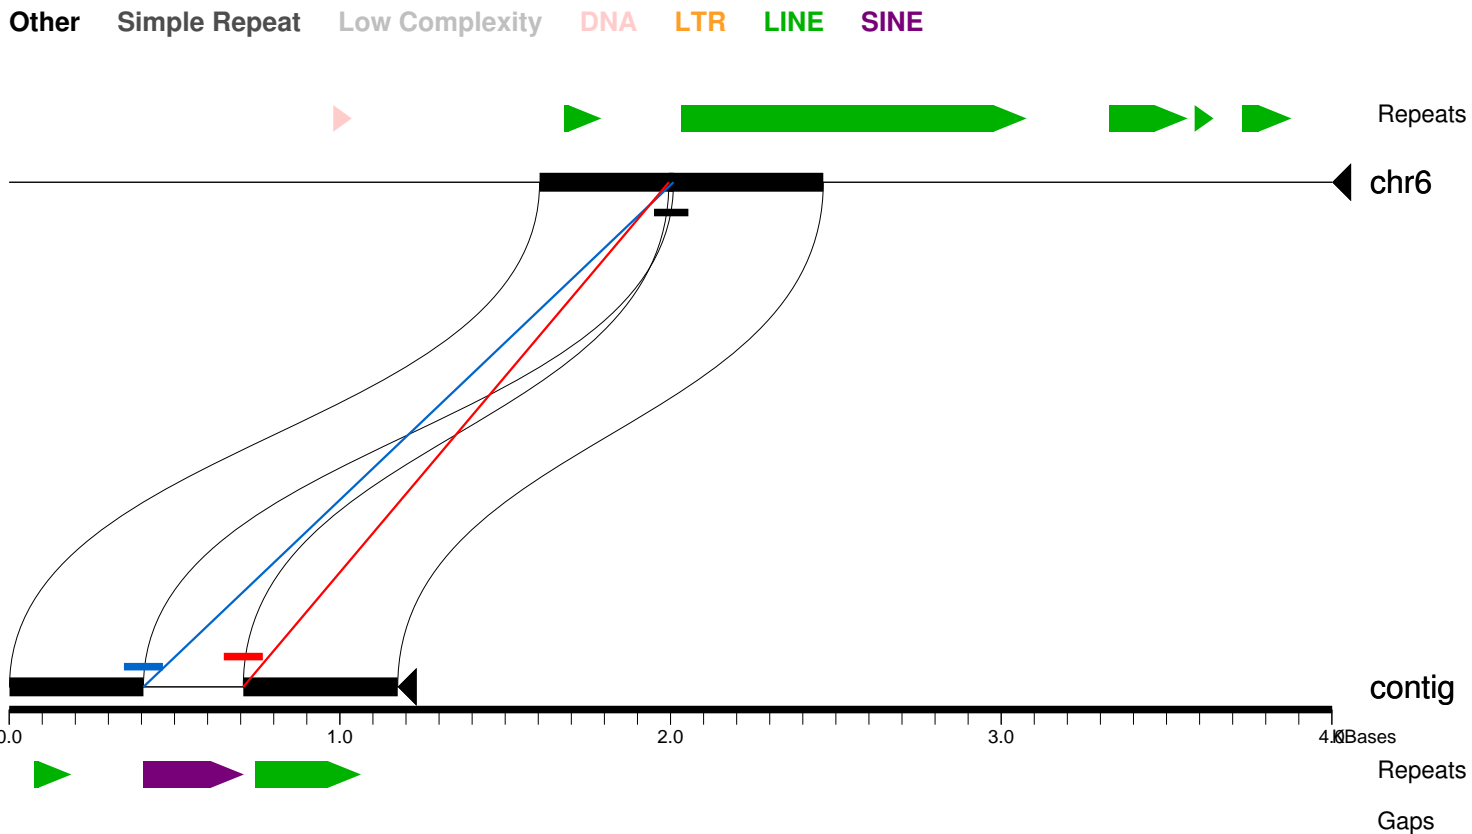

siteID: chr6\_40170283 Scaffitig7 + Breakpoint: chr6:40170280

chr6:40170236-40170339

Overlap Length: 16 INS size: 314 Genotyped: Yes

```
left  TGGACTGTTTCAGGCTTTCTATTTT-----TTCCTGGCTCAATTTTTTGT-----TAGGCTATATT
chrom TGGACTGTTTCAGGCTTTCTATTTT-----TTCCTGGCTCAATTTTTTGT-----TAGGCTATATT
right CCGCCCGCCTCGGCCTCCCAAAGTGCTGGGATTACAGGCGTGAGCCACCGCGCCCGGCCTAGGCTATATT
      11*1*1*1111***1*1*1*111*11111111**1*1***111*111111*111111111*****
```

```
left  TTTCATTTTTTTTTTTTTTTTTTTTTTTTTTTTTTTTTTTGAGACAGAGTCTCGCTCTGTGCGCCA
chrom TTTCATATAAAGCTATTCATTTCTCTGGGCTATCTAATTTGCTGGAAT-----A
right TTTCATATAAAGCTATTCATTTCTCTGGGCTATCTAATTTGCTGGAAT-----A
      ***2*22222*2**22***22*2*2222*2*2*22*22*222**2*22222222222222*
```

Other Simple Repeat Low Complexity DNA LTR LINE SINE

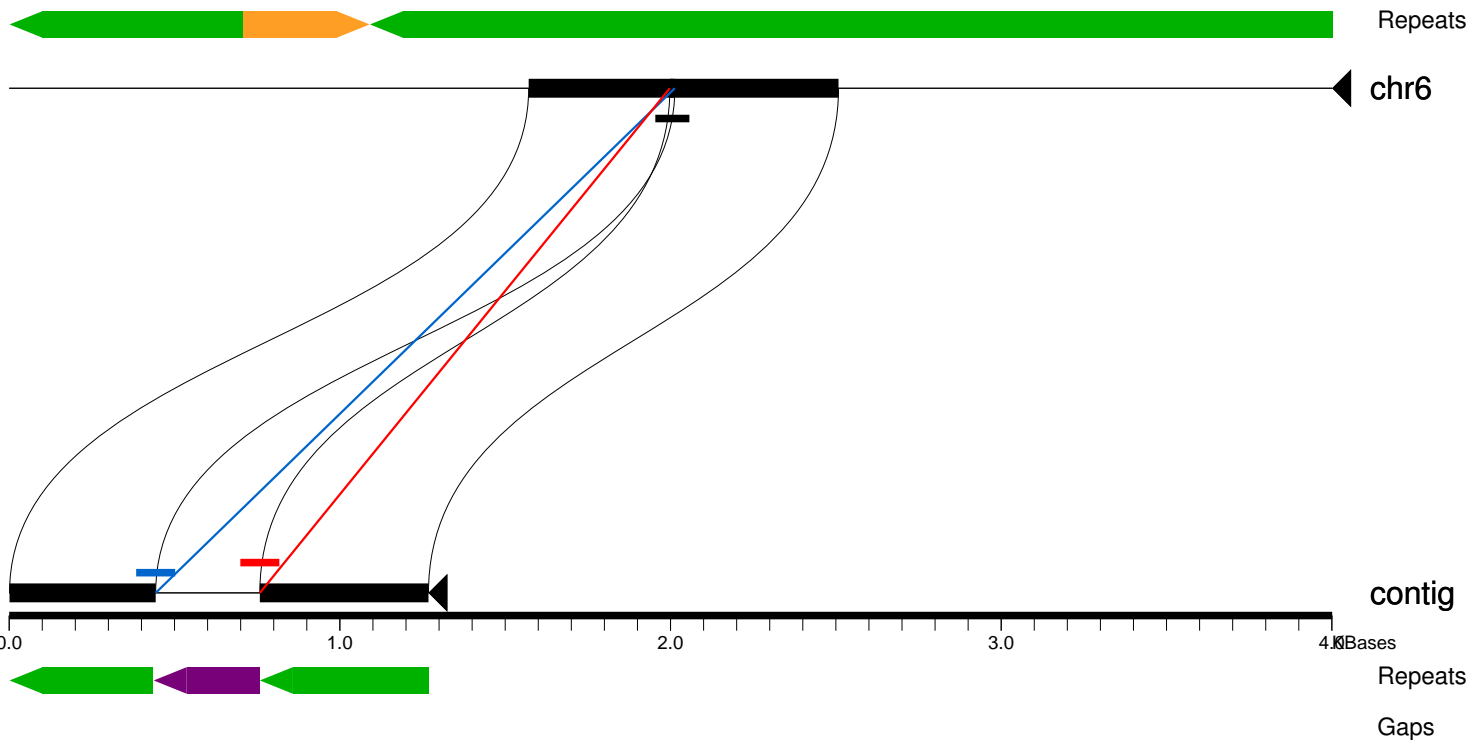







siteID: chr6\_44798616 Scaffitig1 + Breakpoint: chr6:44798617

chr6:44798568-44798676

Overlap Length: 11 INS size: 422 Genotyped: No

```
left   GCA---GTTCTGGAGTC-----TG-TATACTTCCAGCCCAATGAATTAACCTTGAACAGCCACAGCCAT
chrom  GCA---GTTCTGGAGTC-----TG-TATACTTCCAGCCCAATGAATTAACCTTGAACAGCCACAGCCAT
right  CCACCCGCCTCGGCCTCCCAAAGTGCTGGGATTACAGGCGTGAGCCACCGCGCCCGGCCGCCACAGCCAT
      1**111*1111**11**111111**1*1111**1***1*1111*111111*111111*1*******

left   NNNNNNNNNNNNNNNNNNNNNNNNNNNNNNNNNNNNNNNNNNNNNNNNNNNNNNNNNNNNNNNNNNNNNNN
chrom  ATTTTAAGAAATACAGAATAACCTTTTACGATCAAGATAATGCTATGGA-----
right  ATTTTAAGAAATACAGAATAACCTTTTACGATCAAGATAATGCTATGGA-----
      22222222222222222222222222222222222222222222222222222222222222222222
```

Other Simple Repeat Low Complexity DNA LTR LINE SINE

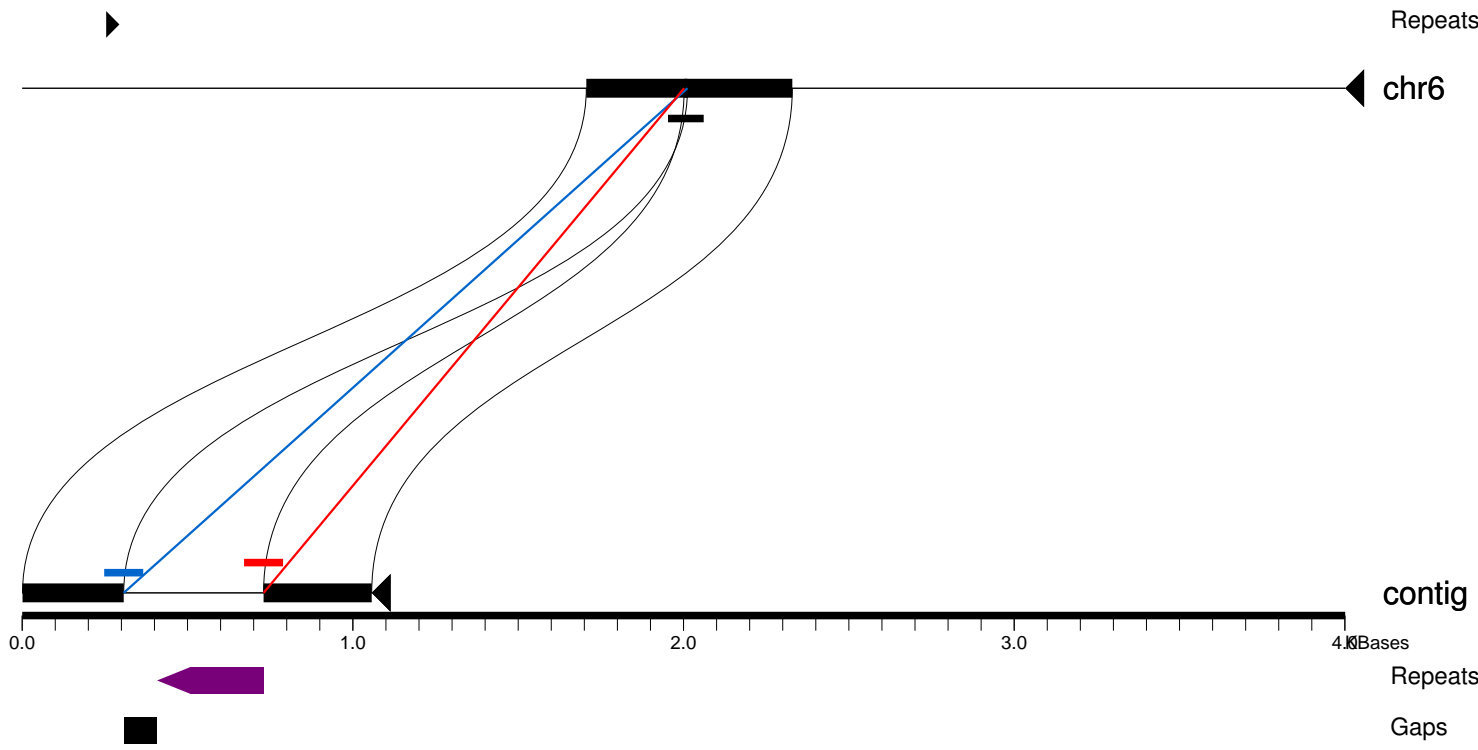



siteID: chr6\_45260477 Scaffold2 - Breakpoint: chr6:45260463

chr6:45260420-45260495

Overlap Length: 17 INS size: 317 Genotyped: Yes

```

left   T-ATT-----CTT-ATACCAGAC-----AAAAGAAACTT
chrom  T-ATT-----CTT-ATACCAGAC-----AAAAGAAACTT
right  AGATTGCGCCACTGCACTCCAGCCTGGGCGACAGCGAGACTCCGTCTCAAAAAAAAAAAAAAAAAAAAAA
11***111111**11*11****1*1111111111111111111111111111111111111111111***1***111

```

```

left   TAAAGCAACAGCAGTTAAAAAAGACAAGGAGGGGCCGGGCGCGGTGGCTCACGCCTGTAATCCCAGCACT
chrom  TAAAGCAACAGCAGTTAAAAAAGACAAGGAGGGGACA-----TTA-----TATAAT-----
right  AAAAAAAAAAAAAAAAAAAAAAAGACAAGGAGGGACA-----TTA-----TATAAT-----
1***11**1*11*111*****2*2222222222222222*2*2222*2***2222222222

```

```

left   TTGGGAGGCGCGAGGCGGGCGGA
chrom  ---GAT-----A
right  ---GAT-----A
2222**2222222222222222*

```

Other Simple Repeat Low Complexity DNA LTR LINE SINE

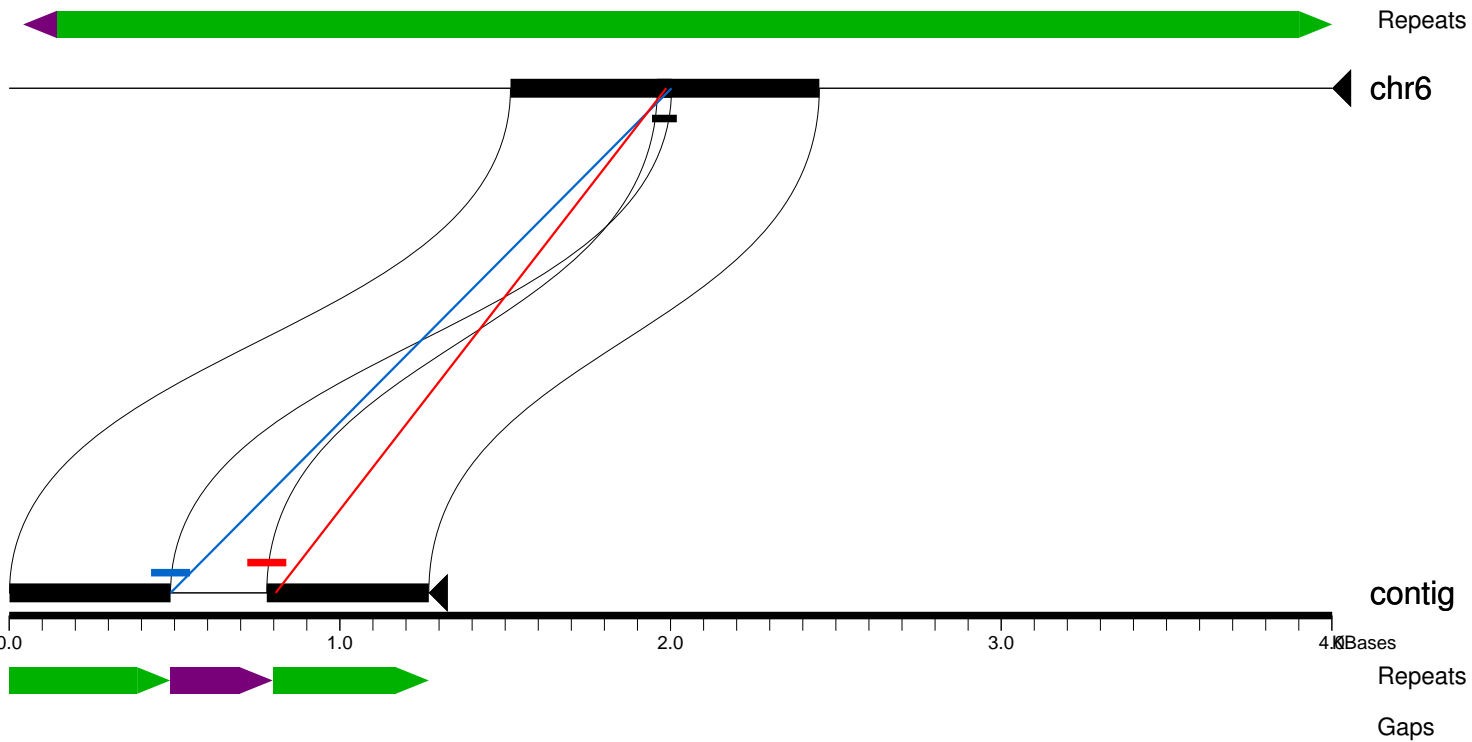

siteID: chr6\_47708279 Scaffitig9 - Breakpoint: chr6:47708257

chr6:47708212-47708313

Overlap Length: 15 INS size: 329 Genotyped: Yes

```

left   GTGAAT-----AATGTGGATCCAAAGGAGAGGGTGGGGTGAGGCTCT----GACTAGAGGGG
chrom  GTGAAT-----AATGTGGATCCAAAGGAGAGGGTGGGGTGAGGCTCT----GACTAGAGGGG
right  GAGACTCCGTCTCAAAAAAAAAAAAAAAAAAGAAAAAAAAAGAAAAAAAAAGAAAAAAAAAGAA
      *1**1*1111111111111111**11111*111***1*1*11111111111*1*111111111**1*****
  
```

```

left   GCCAGAGGCCGGGCGCGGTGGCTCACGCCTGTAATCCCAGCACTTTGGGAGGCCGAGGCGGGCGGA
chrom  GCCAGAG--AGGGTGAGTT-----TCTAGAGCCCCCTCTTT---ACACTGATGCTGGGG--
right  GCCAGAG--AGGGTGAGTT-----TCTAGAGCCCCCTCTTT---ACACTGATGCTGGGG--
      *****222***2*2*2*222222222*2**222**22*2**2**2**2*22
  
```

Other Simple Repeat Low Complexity DNA LTR LINE SINE

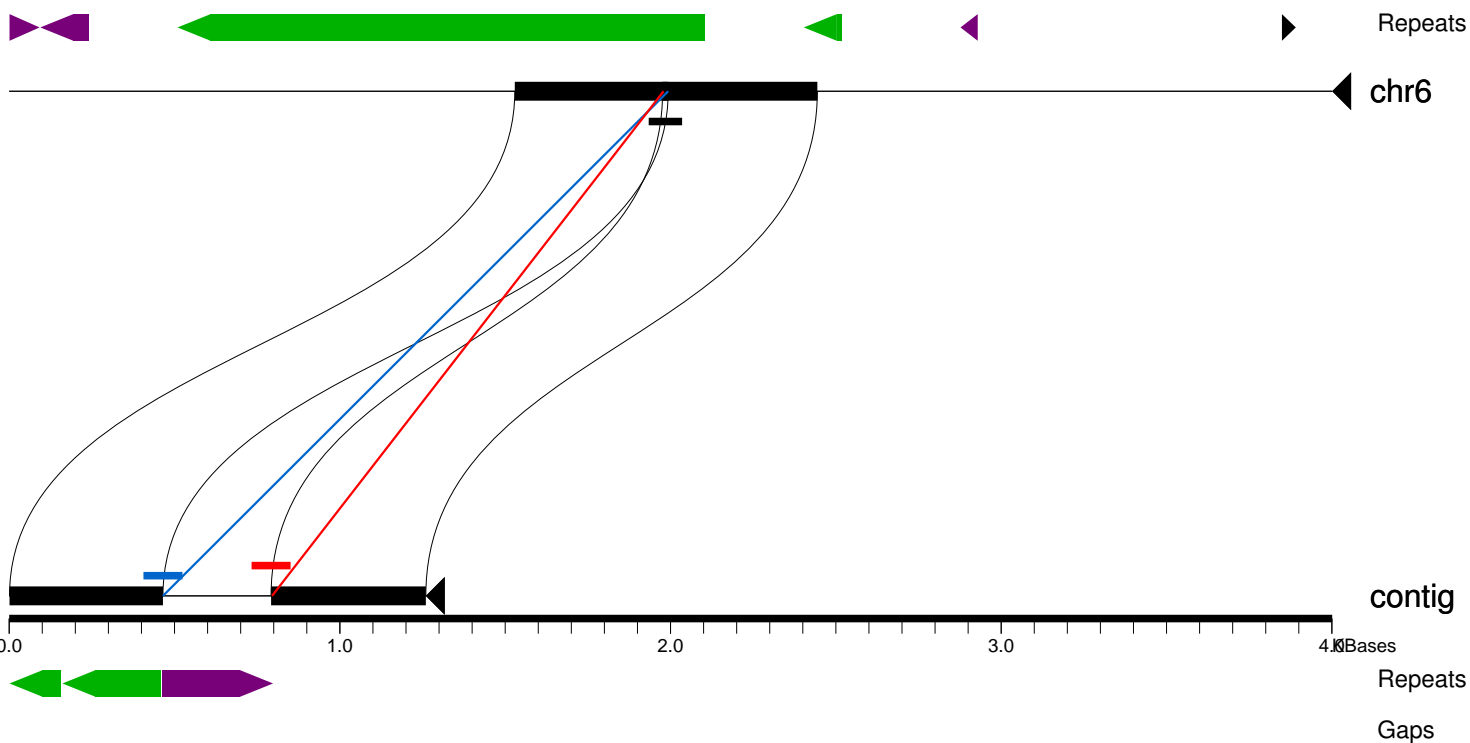





siteID: chr6\_51929661 Scaffoldig2 - Breakpoint: chr6:51929663

chr6:51929613-51929711

Overlap Length: 10 INS size: 308 Genotyped: Yes

```
left  ----ATGGTATCATGGACCCAGGGCTC----ACTGAGTAAGCCA--GTC-----AAATAGATGAG
chrom ----ATGGTATCATGGACCCAGGGCTC----ACTGAGTAAGCCA--GTC-----AAATAGATGAG
right TGCCACTGCAGTCCGCAGTCCGGCCTGGGCGACAGAGCGAGACTCCGTCTCAAAAAAAAAAAAAAAAAAAAA
1111*11*1*1111*1*11*1**1**11111*1***11*1*111***111111111***1*1*11*1
```

```
left  AAAGAATTCAAGGCTGGGCGCGGTGGCTCACGCCTGTAATCCCAGCACTTTGGGAGGCCGAGGCGGGTGG-
chrom AAAGAATTCAA-----ACACTTTTATTTCTAC----TCGCCAGCCCATCATGATTAAA
right AAAGAATTCAA-----ACACTTTTATTTCTAC----TCGCCAGCCCATCATGATTAAA
***** * 22222222222222222222**2*2*2**2*2*2*22222*2*22**2**22222*22*222
```

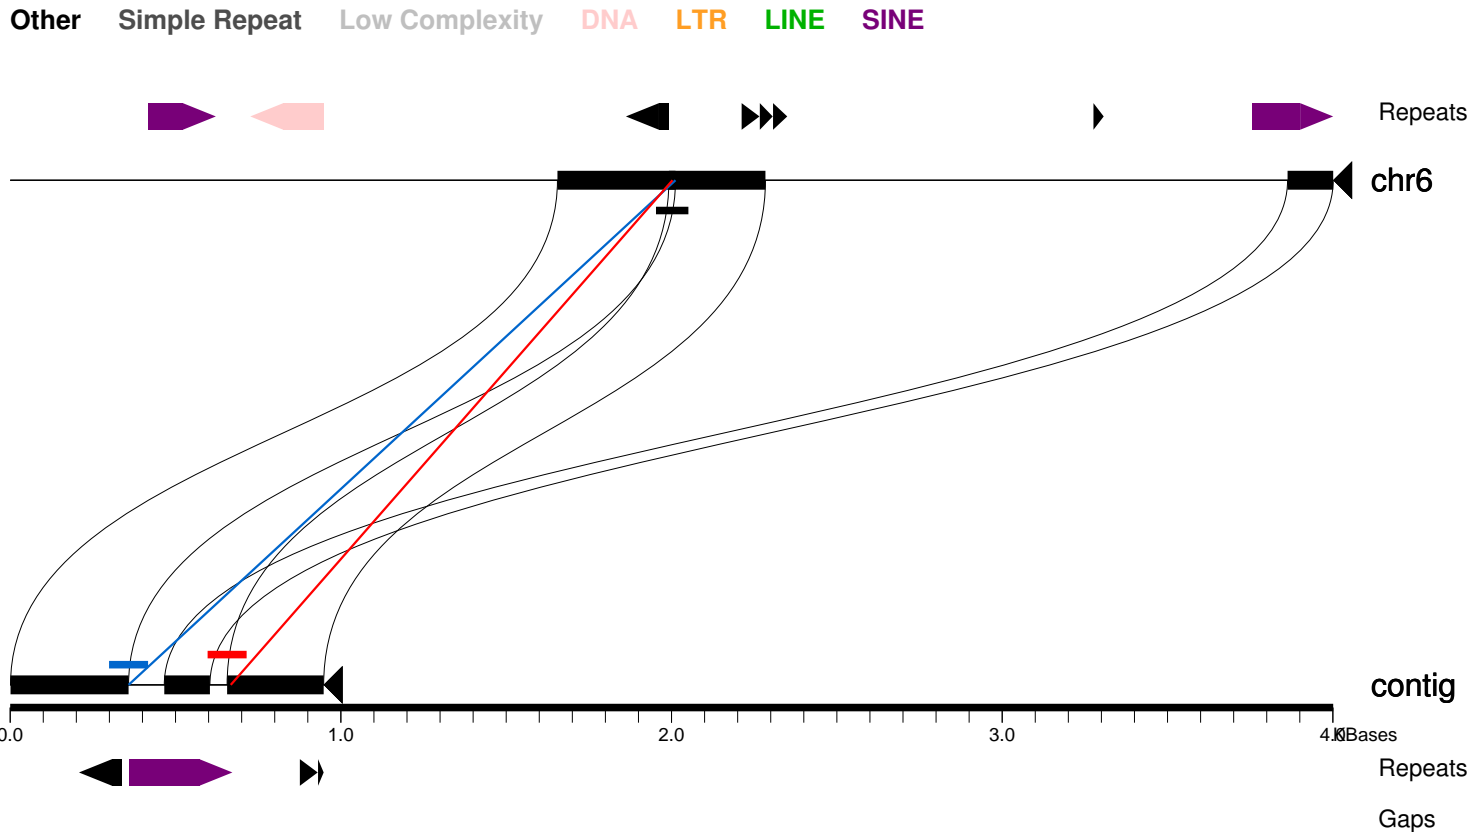

siteID: chr6\_53167450 Scafftig2 - Breakpoint: chr6:53167467

chr6:53167416-53167523

Overlap Length: 9 INS size: 292 Genotyped: Yes

```

left   A-----AGGTATCAAGATT---TTTAAAAATATACATTATAATAAAGAGTTGGTATAAGAA
chrom  A-----AGGTATCAAGATT---TTTAAAAATATACATTATAAGTAAAGAGTTGGTATAAGAA
right  ACTCCAGCCTGGGCGACAGAGCGAGACTCCGTCTCAAAAAAAAAAAAAAAAAAAAAAAAAAAAAA-----AAAAAA
*1111111111111111*111*1*1***1*111*1*1*****1*1*1*11*1*N1***1*111111*1**1**

```

```

left   TTATATTCACGCCTGT--AATCCCAGCACTTTGGGAGGCCGAGGCGGGCGGATCACGAGGTCAGGAA
chrom  TTATATTTAAAGAAAAGTTTATTTCTTAAAC----CCACAACCAGGCTGTTTGCTGAC----TC-----
right  TTATATTTAAAGAAAAGTTTATTTCTTAAAC----CCACAACCAGGCTGTTTGCTGAC----TC-----
*****22*22222**22*2*2**222*222222*222*2*****2*222*2*2**2222**22222

```

Other Simple Repeat Low Complexity DNA LTR LINE SINE

Repeats

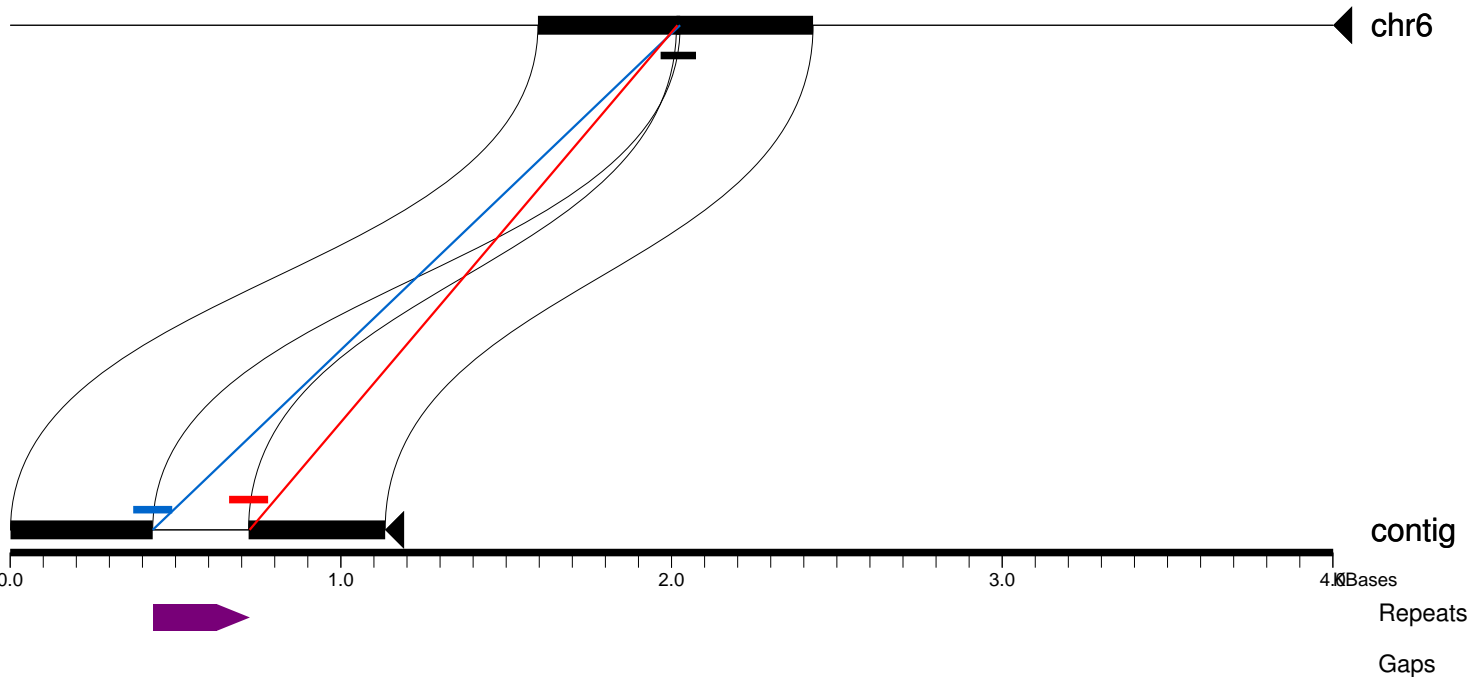



siteID: chr6\_53648750 Scaffitig3 - Breakpoint: chr6:53648745

chr6:53648699-53648791

Overlap Length: 14 INS size: 301 Genotyped: Yes

```

left TAGTAT-----TAGA----AGTATTAGC--CAGA---ACAATTAGTC-----AAGAGAAGGAC
chrom TAGTAT-----TAGA----AGTATTAGC--CAGA---ACAATTAGTC-----AAGAGAAGGAC
right CGAGATCCCCGCCACTGCACTCCAGCCTGGGCGACAGAGCGAGACTCCGTCTCAAAAAAAAAAAAAAAAAAA
      1111**11111111*11*1111**11*11**11***111*1*1*11***111111111**1*1**11*1

```

```

left ATAAAAGGCATATAAAAGGCCGGGCGCGGTGGCTCACGCCTGTAATCCCAGCACTTTGGGAGGCCGAGGCG
chrom ATAAAAGGCATATAAAAT-----TGAATA-GCAGGAAATC-----AATTTGTT-----CT
right AAAAAGGCATATAAAAT-----TGAATA-GCAGGAAATC-----AATTTGTT-----CT
      *1*****222222222222***222*2**22*2***22222*2***2222222222*2

```

```

left GGCGG
chrom TGTTT
right TGTTT
      2*222

```

Other Simple Repeat Low Complexity DNA LTR LINE SINE

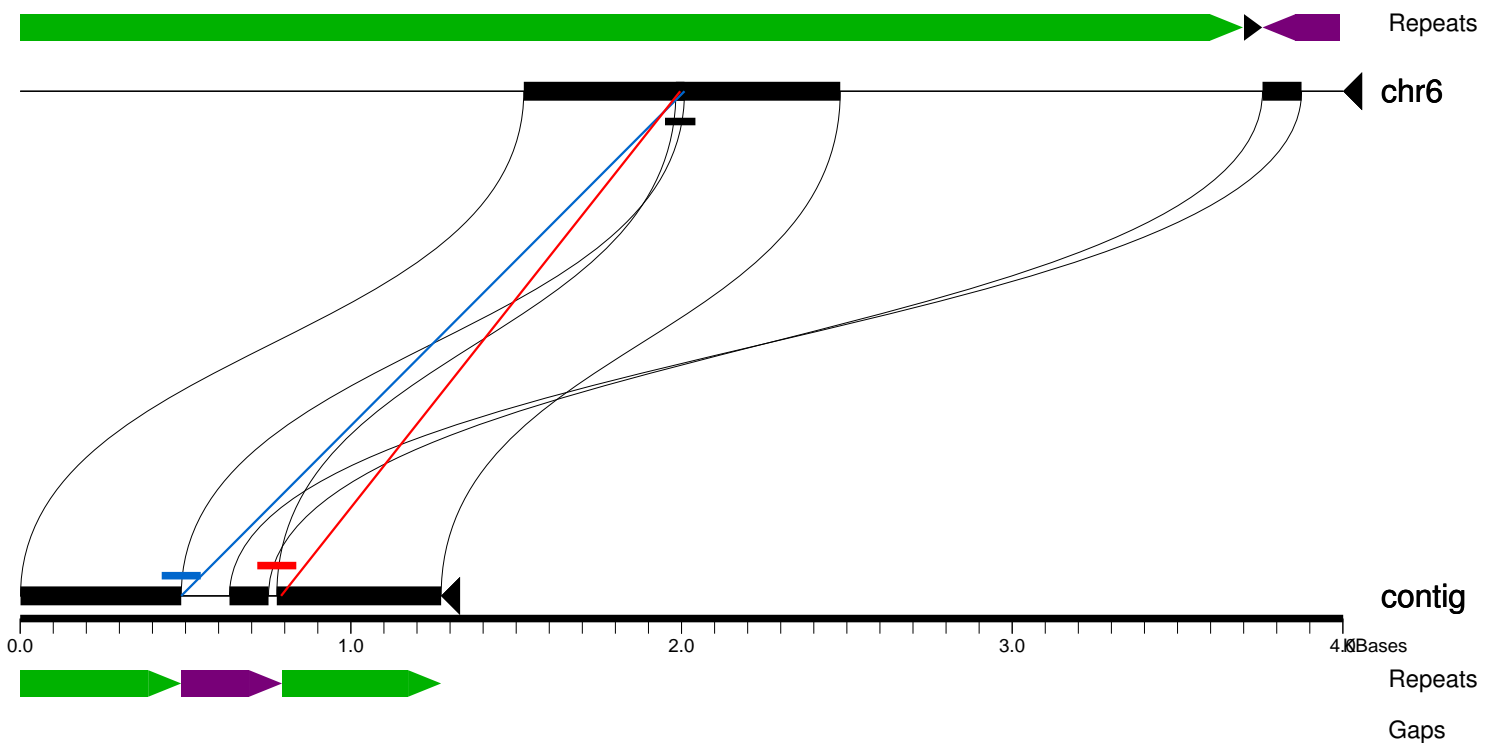





siteID: chr6\_5488864 Scaffitig2 - Breakpoint: chr6:5488873

chr6:5488816-5488932

Overlap Length: 3 INS size: 121 Genotyped: Yes

```
left  TTT--TTGTTTATTTGCTGTAGATCTCTTTTGTGAAAGAGAATGGGTTTAAATGGAGCATAAGGGAGAATG
chrom TTT--TTGTTTATTTGCTGTAGATCTCTTTTGTGAAAGAGAATGGGTTTAAATGGAGCATAAG--AGTTTA
right CGCAGTCCGGCCTGGGCGACAGAGCGAGACTCCGTCTCAAAAAAAAAAAAAAAAAAAAAAAAAAAAG--AGTTTA
      11111*111111*11**111***1*11111*11*1111*1**1111111**111*11*1***22**22*2
```

```
left  GCGTGAACCCGG-GAAGCGGAGCTTGCAGTGAGCCGAGATTGCGCCACTGCA
chrom GTTGGGACTTGTGAATTTGAGGTGCCTCTTAGAA-ATCTCGTGTCTTTGCA
right GTTGGGACTTGTGAATTTGAGGTGCCTCTTAGAA-ATCTCGTGTCTTTGCA
      *222*2**22*22***222***2*22*22*2**222*22*2*2*2*22***
```

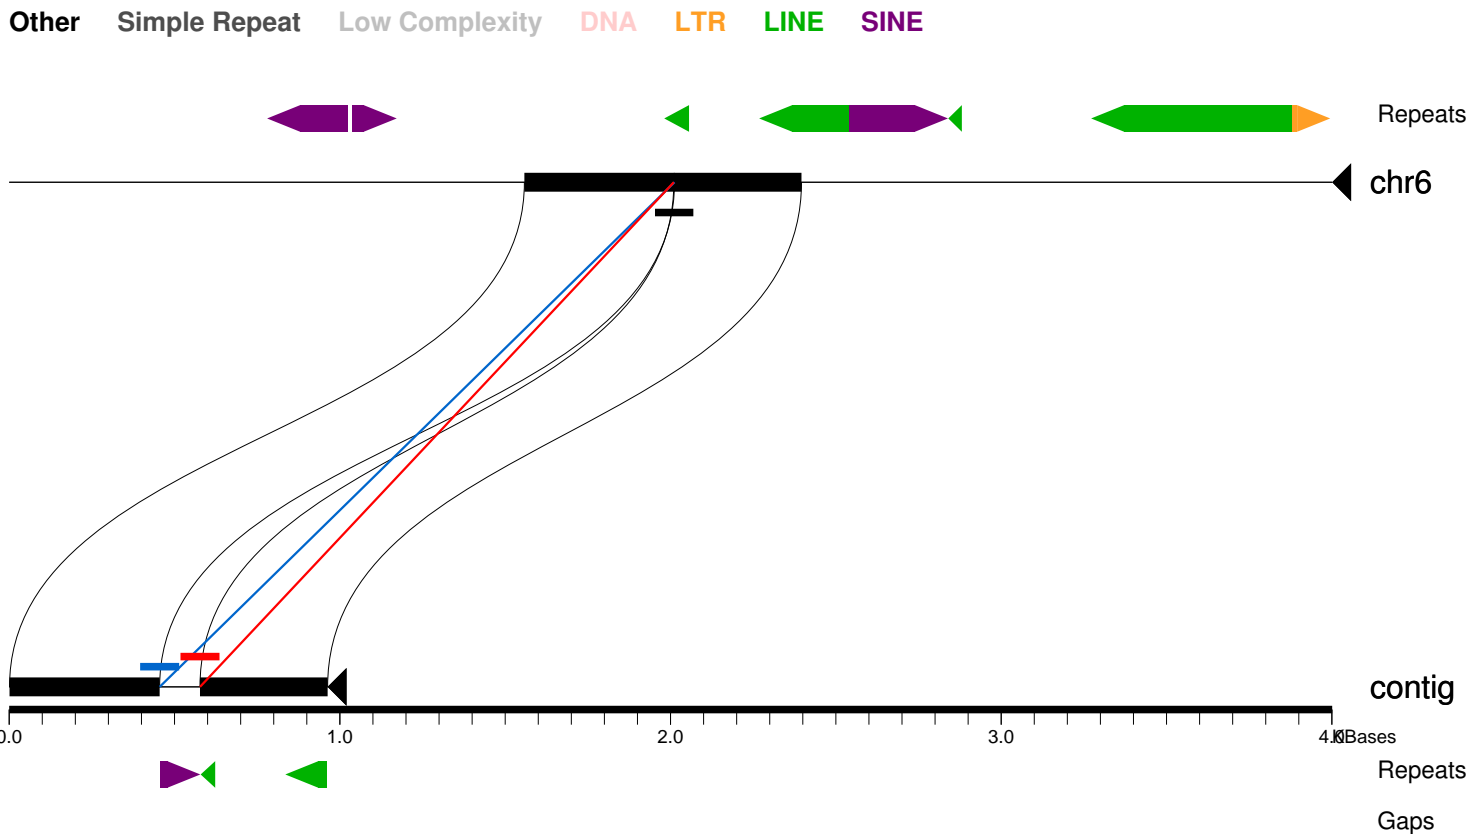



siteID: chr6\_55894486 Scaffitig2 - Breakpoint: chr6:55894495

chr6:55894445-55894554

Overlap Length: 10 INS size: 295 Genotyped: Yes

```
left  GAAGCATGGTGCAGACCAGGA--AGTGAAA---TGGGACAGTG-----ATAACAGTTTATAAAAAATTAT
chrom GAAGCATGGTGCAGACCAGGA--GGTGAAA---TGGGACAGTG-----ATAACAGTTTATAAAAAATTAT
right GCGCCAC--TGCAGTCCAGCTTGGGCGAAAAGAGTGAGACTCCGTCTCAAAAAAAAAAAAAAAAAAAAAAATTAT
      *111**111*****1****11112*1****111**1***111*111111*1**1*1111*1*****
```

```
left  AGGCCGGGCGCGGTGGCTCACGCCGTGTAATCCCAGCACTTTGGGAGGCCGAGGCGGGCGG
chrom AAA----GAACTTTAAATATCTTTT-TAA----AAAACCTGAGCAATAGGAGTTTGCTAA
right AAA----GAACTTTAAATATCTTTT-TAA----AAAACCTGAGCAATAGGAGTTTGCTAA
      *222222*22*22*222*22*222*2***2222*22**N*22*2*2222***222*2222
```

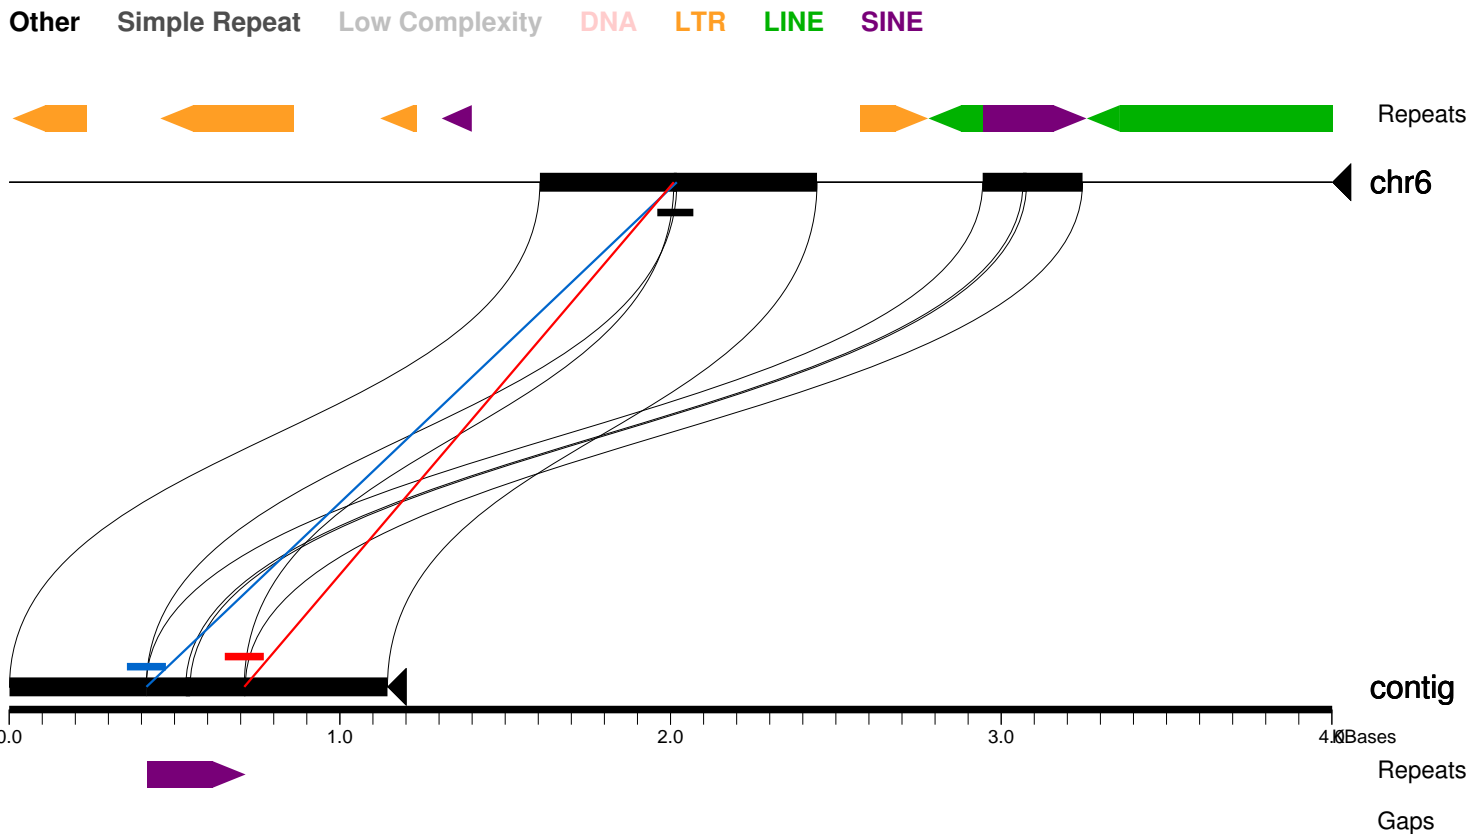



siteID: chr6\_57267491 Scaffitg1 - Breakpoint: chr6:57267473

chr6:57267313-57267643

Overlap Length: 11 INS size: 296 Genotyped: Yes

```
left -----AGAGTTGATACTGGCTTTAAATGATTTGGGTAAATGGAGATGTGCAGCTTACAGAGAGTA
chrom GAGAAAAGATAGAGTTGATACTGGCTTTAAATGATTTGGGTAAATGGAGATGTGCAGCTTACAGAGAGTA
right TG----AGGCAG----GAGAATGGCGTGAACCC-----GGGAGGCGGAGCTTGCAGTGAGCC
NN      22NN**1111**1*1****1*1**111111111111111111*1**1*1*1*****1**1**11
```

```
left GTAGATGTAAATGGTTAGGTGCTGGAAAAGCATAACTATGTTTGGGGAATGGTGTTAGTGGTATGATTGGT
chrom GTAGATGTAAATGGTTAGGTGCTGGAAAAGTATAACTATGTTTGGGGAATGGTGTTAGTGGTATGATTGGT
right G-AGAT-----CCCCGCACTGCACTCCAGCCTGGGCGACAGAGCGAGAC-----TCCGT
*1****1111111111111111*11*11*1211*11111*11****11*11*1*11**11111111*11**
```

```
left ATGATTTAATGTCTATGAATAAGAATAGCAGGCCGGGCGCGGTGGCTCACGCCGTGAATCCCA-GC----
chrom ATGGTTTAATGTCTATGAATAAGAATAGCAGAA-GATCAAATTTGTCAAA-GTAAGTATTACCAAGCTTAT
right CTCAAAAAAAAAAAAAAAAAAAAA-AAGAATAGCAGAA-GATCAAATTTGTCAAA-GTAAGTATTACCAAGCTTAT
1*1N111**11111*11**1*****222*22*2222**2*22*2*222***2*2***2**2222
```

```
left -ACTTTGGG----AGGCCGAG-GCGGGCGGATC----AC----GAG---GTCAGGAGATCGAGACCAT--
chrom GAGTTTGAATTTTAGTGTGTGTGCTGGTGGTTTCTAAACTTTTGGATTGTGTCCCTCAGTTAAAAATATTA
right GACTTTGAATTTTAGTGTGTGTGCTGGTGGTTTCCAAACTTTTGGATTGTGTCCCTCAGTTAAAAATATTA
2*N****222222**222*2*2**2**2**2*22N22**2222**2222***22222*222*2*22**22
```

```
left -CCCGCTAAAC-----GG-----TGAAACCCCGTCTCTACTAA-----A
chrom CCCCTGCCACAGATGTAGGCAATATAAAATGGGGGTTTAAAAAAGGAGAAAA
right CCCCTGCCACAGATGTAGGCAATATAAAATGGGGGTTTAAAAAGG-----A
2**2**22*2*222222**22222*2***2222*22*2**22*12 *
```

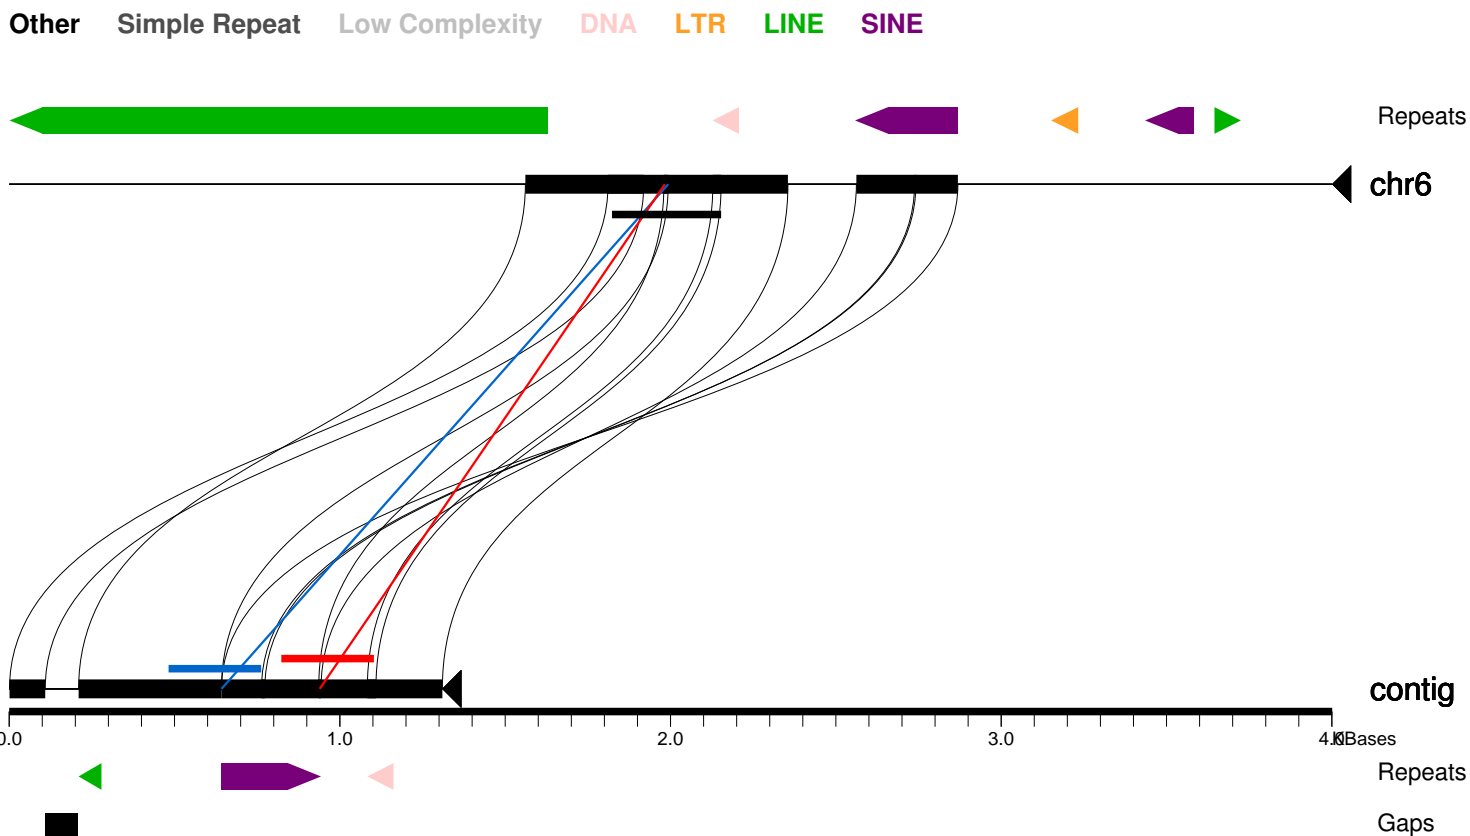

siteID: chr6\_57403550 Scaffitig14 + Breakpoint: chr6:57403535

chr6:57403375-57403706

Overlap Length: 12 INS size: 291 Genotyped: Yes

```
left ----ATCGTTTACATGTTTTTTCAATGACATGTAATAAACTAAGGCATACTAAATTTACAATATTTCTCTAA
chrom CTATATCATTTAAATGTTTTTTCAATGACATGTAATAAACTAAGGCATACTAAATTTACAATATTTCTCTAA
right TT---TAGTAGAGACGGGGTTTTCCACCG---TGT--TAGCC--AGG-----ATGGTCTC---
N2 1*1N*11*N*1*111*****11*111**11**11*11***111111111111111**11**111
```

```
left TTGAACCATTGTATCTATTTGTTAAGTGATACATAACAATTAATAAATATTCTTAAGAGGTATAAAAAATTGT
chrom TTGAACCATTGTATCTATTTGTTAAGTGATACATAACAATTAATAAATATTCTTAAGAGGTATAAAAAATTGT
right --GATCTCCTG-ACCTC-----GTGATCCGCCCAGCCTCGGCCTC--CCAAAGTGCTGGGA---TTAC
11**1*111**1*1**1111111111*****1*111*111*11111*111*11***1*1*111*111**11
```

```
left TGGCTTAAAAATACTGCTTAT----AGGATTTTTTTT-----TTTT-----TTTTTTTG
chrom TGGCTTAAAAATACTGCTTAT---AGGATATTTTTTAGGATGATTATAGAAGATGTTAAACATTTTTTAT
right AGGCGTGAGCCACCGCGCCCGCCAGGATATTTTTTAGGATGATTATAGAAGATGTTAAACATTTTTTAT
1**1*1*111**1**111111111*2*****2*****22222222*2*22222222222222*****22
```

```
left AG-----ACGGAGTCTCGCTGTGCG--CCGAGGCTGGAGTGCAGTGCGCAATCTCGGCTCACTG--
chrom AGTGCTAATGAAAGGACT-TGGGTGTTGAACCCAG-CTCGAATGATTTGAAATAACAGCTTCTGTTTGGGA
right AGTGCTAATTAAAGGACT-TGGGTGTTGAACCCAG-CTCGAATGATTTGAAATAACAGCTTCTGTTTGGGA
**2222222N2*2***2*2*2*2***2*22*****2**2**2*222**2222*222*22**22**22
```

```
left CAGGCTCCGCCC--CTGGGCT-----TCACGC-----CATTCTCCTGCCTCAGCC
chrom CAGCTTATGTCCTAACAGTGTAAGAAAAATGATGTGGTAACAGTCAATTTCAACTGGA
right CAGCTTATGTCCTAACAGTGTAAGAAAAATGATGTGGTAACAGTCA-----
***22*22*2**222*2*2*22222222*2*2*222222**2**2NN1N1NN1N1NN
```

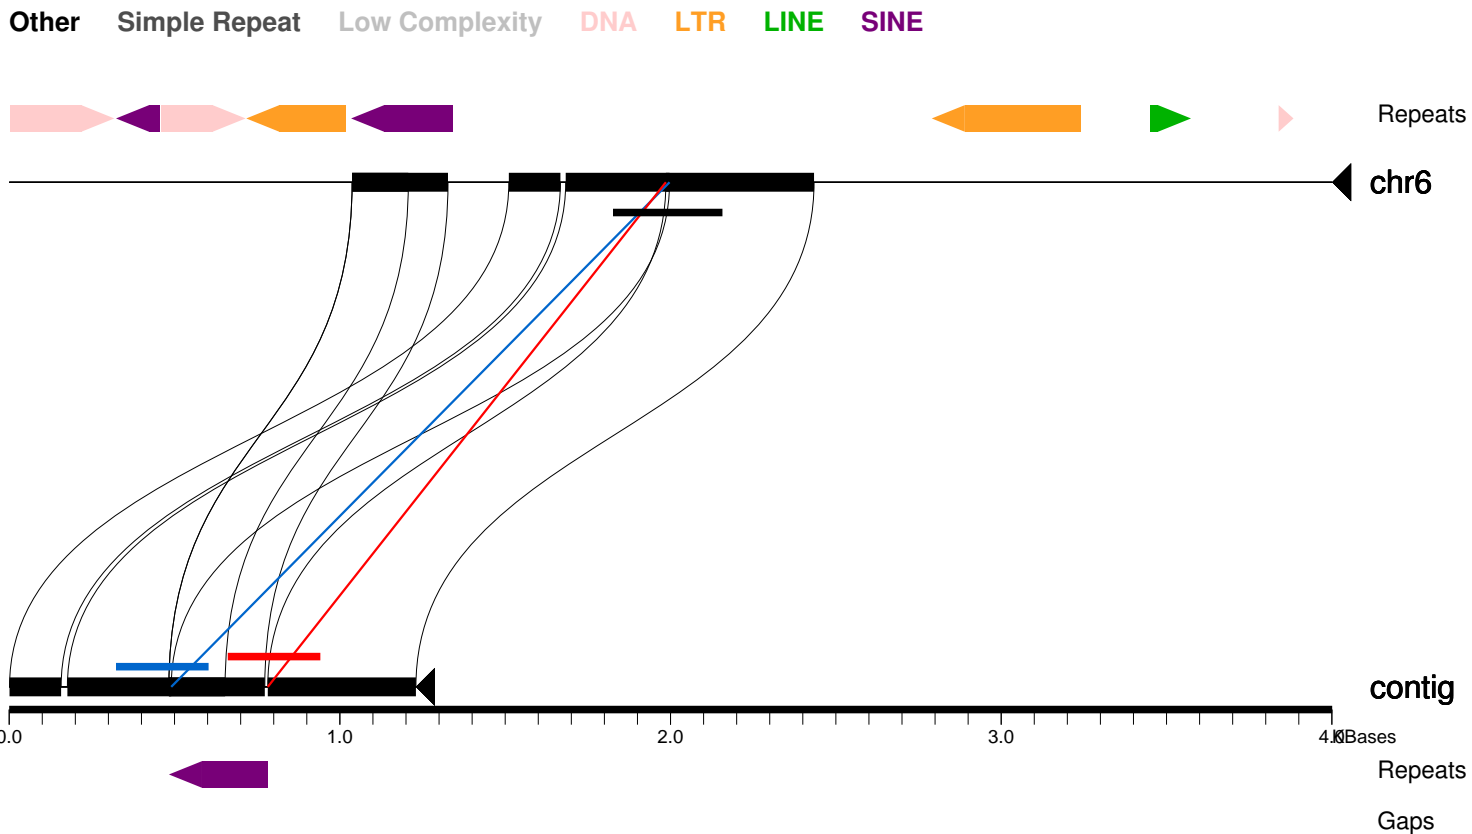

siteID: chr6\_57444953 Scaffoldig15 + Breakpoint: chr6:57444959

chr6:57444918-57445018

Overlap Length: 19 INS size: 305 Genotyped: Yes

```
left  AC-----TGGG-----AGCTCT-----TTCAGATTGGCTCCTGTGCTTTCTTGACACACCTCCTT
chrom AC-----TGGG-----AGCTCT-----TTCAGGTTGGTTCTGTGCTTTTTTGACACACCTCCTT
right CCGCCCGCCTCGGCCTCCCAAAGTGCTGGGATTACAGGCGTGAGCCACCGCGCCC--GGCCACCTCCTT
      1*11111111*1**11111111**11**11111*1***2111*N1**111**111N11*1*1*****
```

```
left  CCTTCTTTTGTGTTTTTTGTTTTTTTTTTTTTTTTTTTGGAGACGGAGTCTCGCTCTGTGCGCCAGGCTGGAGT
chrom CCTTCTTTTGA-----GCACATCCTC-----CCTAGCACCACAAGATGCTTCAGACTC-ATC
right CCTTCTTTTGA-----GCACATCCTC-----CCTAGCACCACAAGATGCTTCAGACTC-ATC
      ******222222*2222*22*222222222222*22**222*2*2222*2222***2**22*22
```

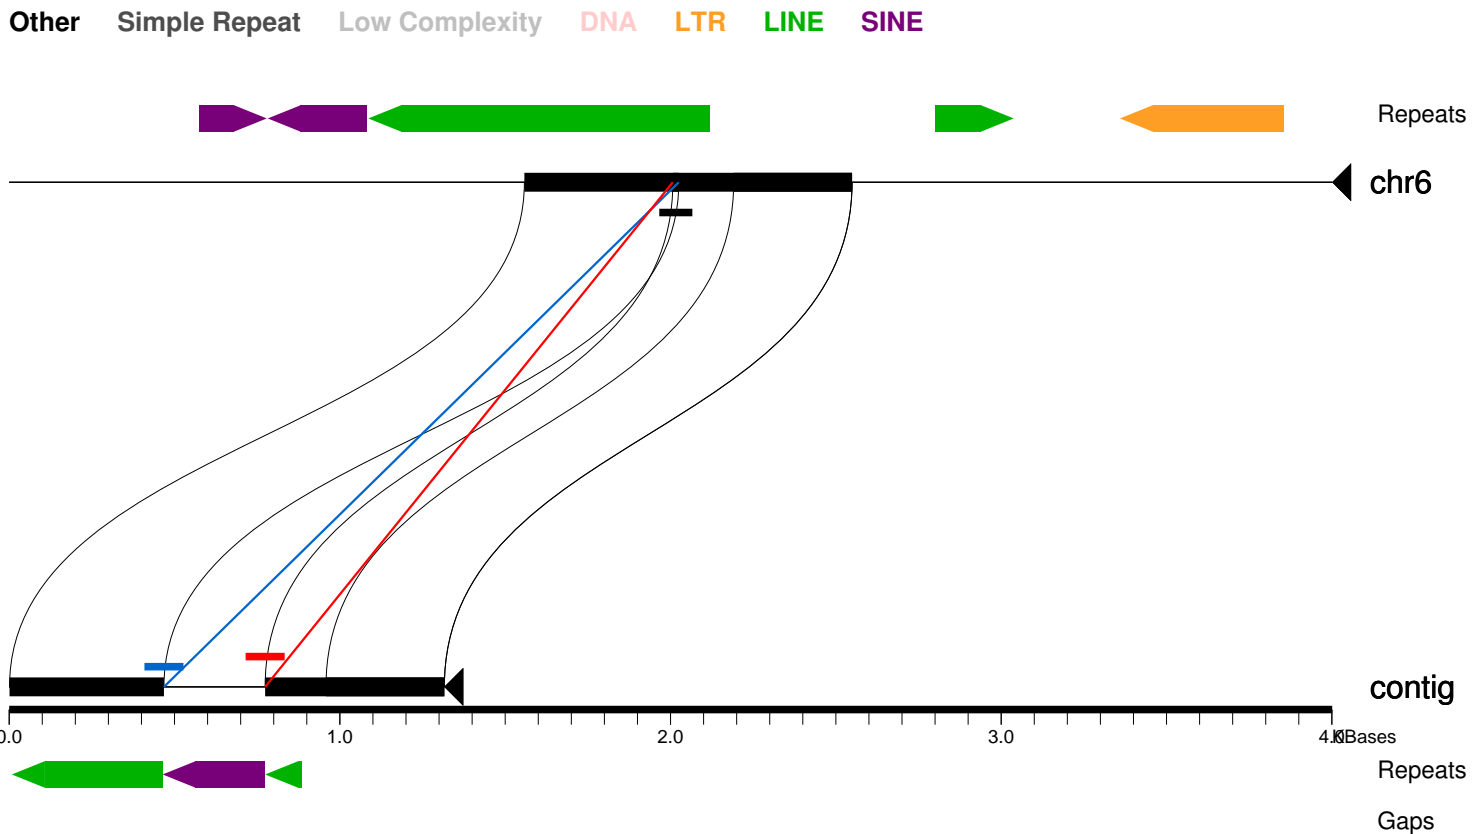



siteID: chr6\_57509289 Scaffitg2 - Breakpoint: chr6:57509298

chr6:57508737-57509458

Overlap Length: 17 INS size: 301 Genotyped: Yes

```
left  -----
chrom GCAATCCCATTACTGGGTTGTACCCAAAGGATTATACATCATGCTACTCTAAAGACACATGCACACGTAT
right -----
```

```
left  -----
chrom GTTTATTGTGGCATTGTTTCAACAATAGCAAAGACTTGGAAACCAACCCAAATGCCACCAATGATAGACTGG
right -TTTAGT-----AGAGACGGG
       2222N2                               2N2222N22
```

```
left  -----
chrom GTAAAGAATATGTGGCACATATACACCATGGAATACTATGCAGCCATTAAAAAGGATGAGTTCATGTCTCT
right GT-----TTCACCGTG-----TTAGCCAGGATG-----GTC-----
       22                               2N2222N22           222NNN222222           222
```

```
left  -----
chrom TTGCAGGGACATGGAAGAAGCTGGA AACCATCATTCTCAGCAAACTAACACAAGAACAGAAAACCAAACAC
right -----TCAATCTC-----CTGAC-----
              222N2222           22N22
```

```
left  -----
chrom TGCATGTTCTCACTCATAAGTGGGAGTTGAACAATGAGAACACATGGACACAGGGAGGGAAATATCACAC
right -----CTC-----GTG-----ATCC-----
              222           222                               222N
```

```
left  -----
chrom ACCAGGGCCTGTTTTGGGGGGGTTGGGGTGCTAGGGGAGAGATGGCATTAGTAGAAGTCCCTAATGTAAAT
right -----GCCCGTCTCGGC-----CTCCCAAAGTCTGGGATTA-----AGAT
              222N22N2N22N           22NNNNN22N2N22N2222           1N11
```

```
left  AACAGGTTGGTGGGCGCAGCAAACCACCATGGCATGTGTATGCCTATGTAACCTGCACGTTCTGCACATG
chrom AACAGGTTGGTGGGACAGCAAACCACCATGGCATGTGTATACCTATGTAACCTGCATTTCTGCACATG
right --CAGC--GTGAGC-----CACCACGCC-----CAGCC-----
       11****111**1**N111111111****1*1*11111111N11111111111111111111N11*1**1*111
```

```
left  GACTCCAGAACTTTAAGTATAATTTAAAAAATATTAATTTAAAAATGAGGATTCATTAACGATATGCACATA
chrom GACTCCAGAACTTTAAGTATAATTTAAAAAATATTAATTTAAAAATGAGGATTCATTAATGATATGCACATA
right 1111111111111111111111111111111111111111111111111111111111111111111111111111111
```

```
left  CCTTAAATATTATATCTTTTTTTT-----TTT-----TTTTTTTTTTTTGAGACGGAGTTTCGCTCT
chrom CCTTAAATATTATATCTTTAAAGTTAAGATATTTAAATGCCATTTATTAGTTAGAGCAGGGTCTTTTGAGT
right -CCTTAAATATTATATCTTTAAAGTTAAGTTCATTTAAATGCCATTTATTAGTTAGGGCAGGGTCTTTTGAGT
       1*****2222**222NN2***22222222***2**22**2*1*22**222**22222*
```

```
Other Simple Repeat --CGAGTCCAGTGGCGCAATCTCG-----TCACAGCTCCGCCTCCCGGGTT
chrom ATCGTTTAGTGTGGAAATTTGATTTTATCTTTCTTTTATAAACTATAACCATAATACAGCATCAGCAAT
right ATCGTTTAGTGTGGAAATTTGATTTTATCTTTCTTTTATAAACTATAACCATAATACAGCATCAGCAAT
       2**222**22*222*2*2*22*2*222*22***2222222***22222**222*2*22*2*222*
```

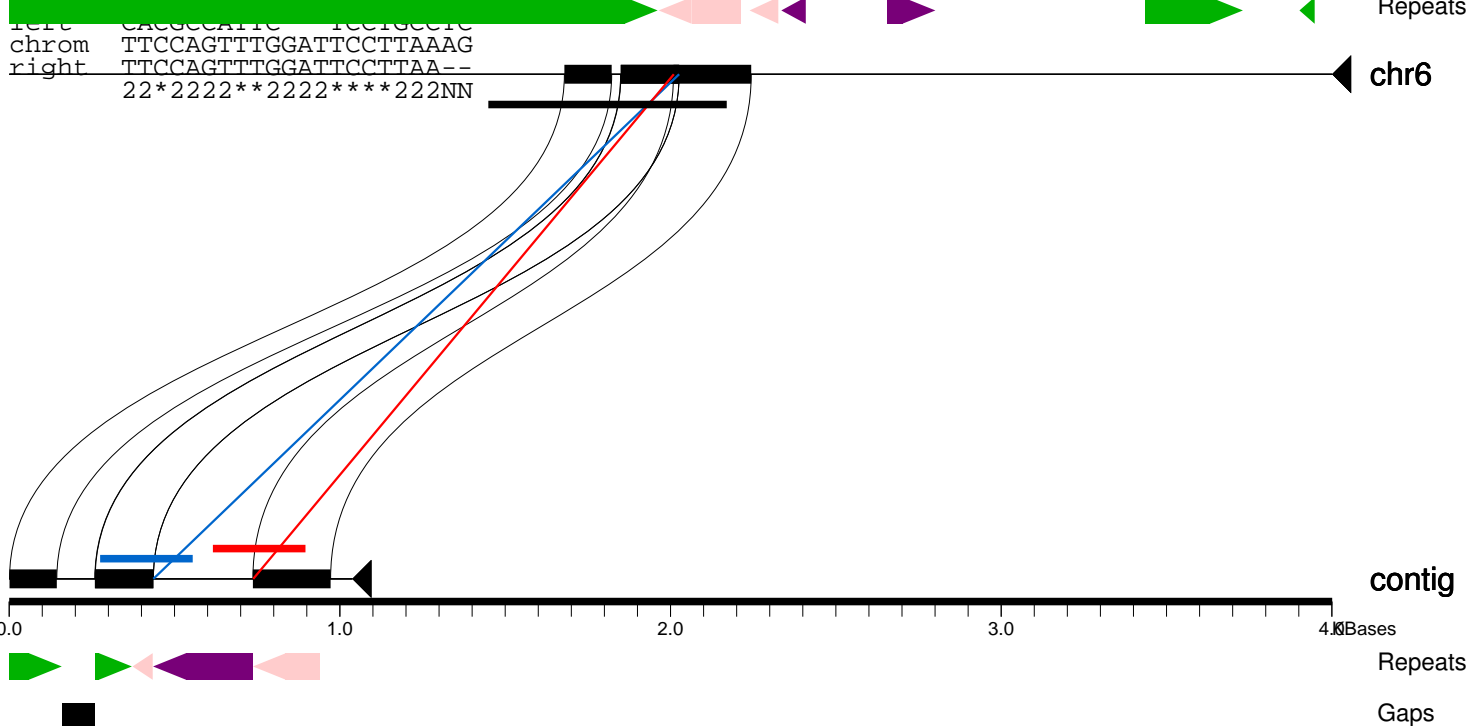

siteID: chr6\_58146695 Scaffitig5 + Breakpoint: chr6:58146658

chr6:58146498-58146823

Overlap Length: 1 INS size: 351 Genotyped: Yes

```
left -----CCCAGTACTGCCTAAAAACAAGGGTGAGTCAGAG
chrom TAAACTTGTCTGAGCAAAGAGCCGTACCTCTGTGGAGTCCAGTACTGCCTAAAAACAAGGGTGAGTCAGAG
right TTTAGT-----AGAGACGGAGTTTCGCCGTGT-----TA--GCC----AGGATGGTC--TCGGTC
      2NN2N2          2222N22N2NN2NN2NN2N2211111**11***1111*11*1***111**1*11
```

```
left ACCAGAATTTAAAGGGTTTGGGGACTGGAGCTATTCATAGGACACTTTTAGGGGGAAAAGTTAGTAAGGTC
chrom ACCAGAATTTAAAGGGTTTGGGGACTGGAGCTATTCATAGGACACTTTTAGGGGGAAAAGTTAGTAAGGTC
right TCCTGACCTT-----GTGATCCGCCCGC--CTCGGCCTCCGAAAGTGCTGGGATTACAGAC--GTGAG---
      1**1**11**11111**11111*1*1*111**111*1*11**1*1*11*1**111*1**111**1**111
```

```
left CTTCTCAGGAGGGACTGGACAAGAATTTCTTTTTCTTTTTCTTTTTCTTTTTCTTTTTCTTTTTCTTTT
chrom CTTCTGAGGAGGGACTAGACA--ATTTCTA-----AACTAGGCGAATCATAGGTTTATTCAGTGGAAC
right CCACCGCGCACGGCC---AGA--ATTTCTA-----AACTAGGCGAATCATAGGTTTATTCAGTGGAAC
      *11*121*1*1**1*1N1*1*22*****222222222**222*222**2*222***2*2222*22222
```

```
left TTTTTTTTTTTTTTTTTTTGAGA---CGGAGTCTTGCTCTGTCGTCCTTGGCTGGAGTGCAGTGGCGGATC
chrom TTAGCTGCTGGAACATGAAGATCTGCGCAGAGTTGCTGGATCCGTTTGGCTTTGGTCTTATCTTG--GATC
right TTAGCTGCTGGAACATGAAGATCTGCGCAGAGTTGCTGGATCCGTTTGGCTTTGGTCTTATCTTG--GATC
      **222*22*222222*22***2222**2*22*****222**222*****222**2222*222*2****
```

```
left -TCGGTCACTGCAAGCTCCGCCTCCAGGATTCACGCCATTCT-----
chrom ATCGGGTCTGAGTAAGCTGGTGTAAAAACAATTAGAGCTTAGTGTAGCATGGCAGG
right ATCGGGTCTGAGTAAGCTGGTGTAAAAACAATTAGAGCTTAGTGTAGC-----
      2***2**222*2*****22222*22*22*2*2*222*2*22*22222
```

Other Simple Repeat Low Complexity DNA LTR LINE SINE

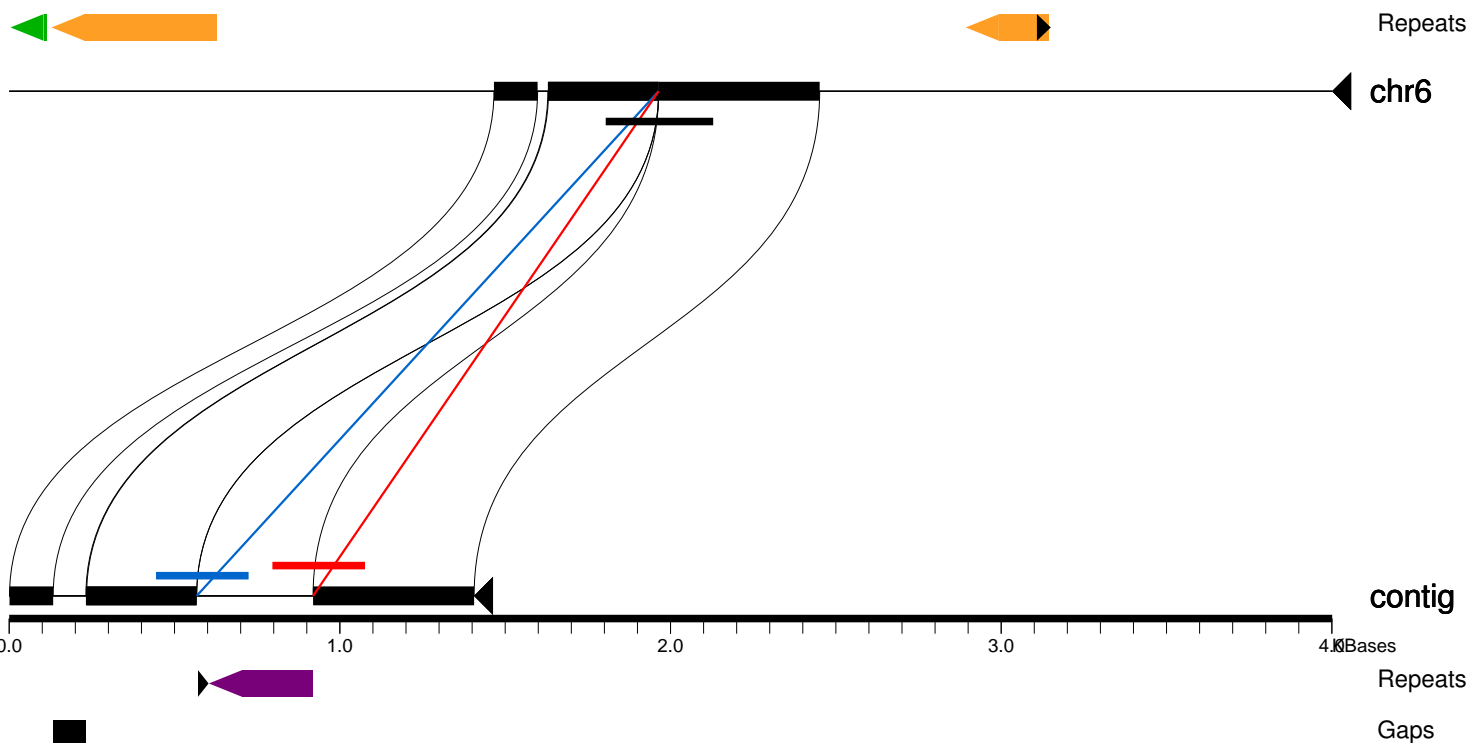

siteID: chr6\_6034772 Scaffitg3 - Breakpoint: chr6:6034763

chr6:6034717-6034822

Overlap Length: 14 INS size: 307 Genotyped: Yes

```
left  G-----GATAAAGTGTG-----GTTTTTAAACAGGTGATATAGGTTGTTTAAATTTAGAAAAGAGA
chrom G-----GATAAAGTGTG-----GTTTTTAAACAGGTGATATAGGTTGTTTAAATTTAGAAAAGAGA
right TCCAGCCTGGGCGACAGAGCGAGACTCCGTCTCAAAAAAAAAAAAAAAAAAAAAAAAAAAAAAA--AAATAAAAAAGA
      1111111111111111**1*1**1*1*111111**1*11**1*11111*1*1*111111111**111*1****1***

left  AAGCACGGCCGGGCGCGGT-GGCTCACGCCGTGTAATCCCAGCACTTTGGGAGGCCGAGGCGGGCGG
chrom AAGCACA-----CTGTAGGCCATA---GAAGTGGAAAAGATTTTTCTTCTCC-AGAAGAAA--
right AAACACA-----CTGTAGGCCATA---GAAGTGGAAAAGATTTTTCTTCTCC-AGAAGAAA--
      **1***222222222*2**2***2**22222*2*2*222*22*2***222222**2**22*22222
```

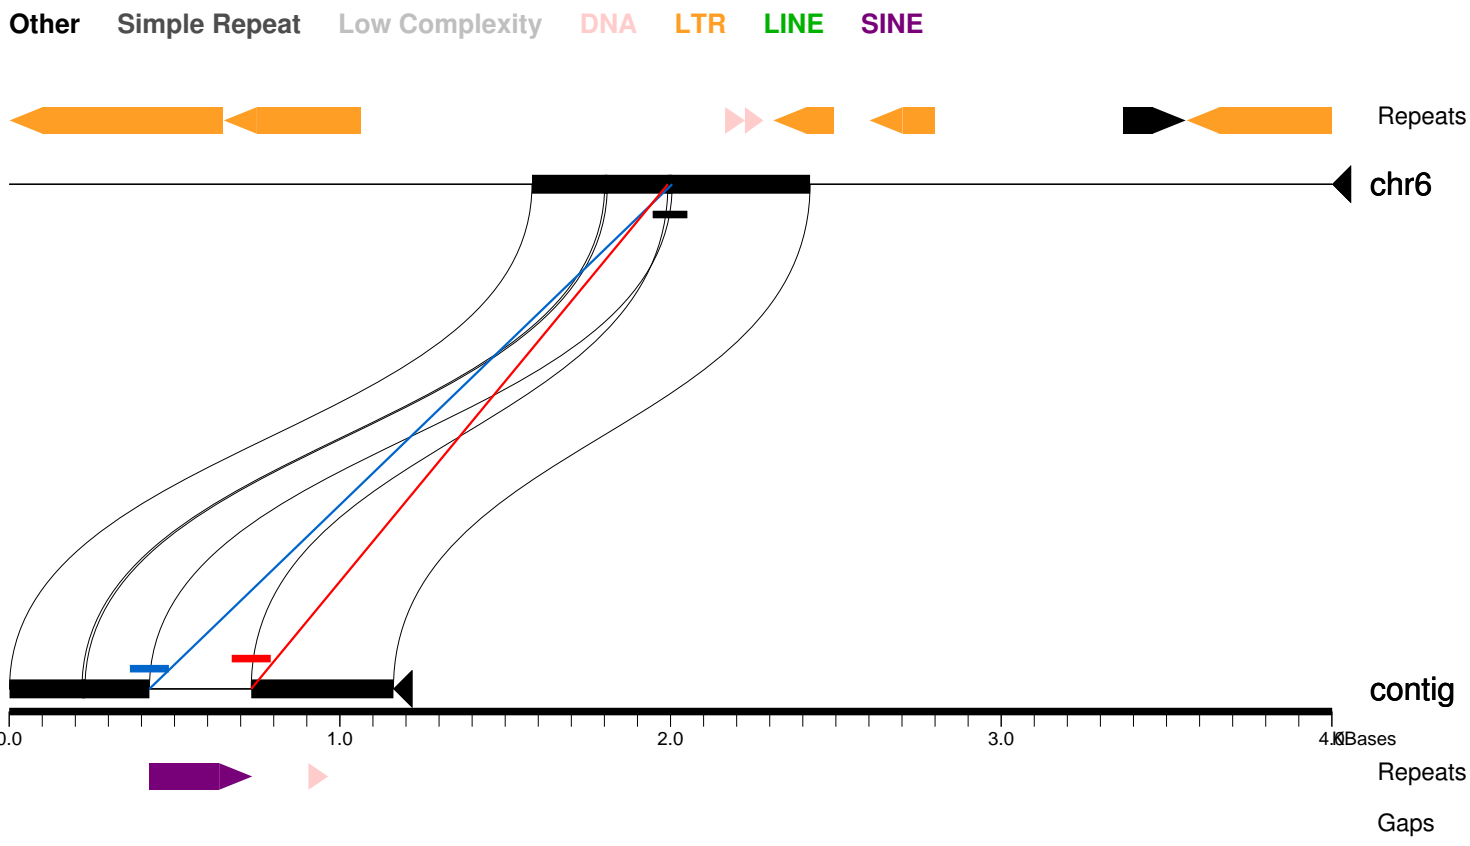

siteID: chr6\_66163985 Scaffitg1 + Breakpoint: chr6:66163967  
 chr6:66163923-66164026  
 Overlap Length: 16 INS size: 295 Genotyped: Yes

```

left  TTGGATACATAACCACTGGGGGATTGTTGG-ATCATATG-GTA-----GTTCTATTTTTCT
chrom TTGGATACATAACCACTGGGGGATTGTTGG-ATCATATG-GTA-----GTTCTATTTTTCA
right CCGCCCGCCTCGGC-CTCCCAAAGTGCTGGGATTACAGGCCTGAGCCACCGCGCCCGGCCCTATTTTTCA
      11*11111*1*1111*1**11111*1**1***1**1*1*1*1**111111111111111*11*****2

left  TTTTTTTTTTTTTTTTTTTTTTGGAGACGGAGTCTCGCTCTGTCGCCAGGCTGGAGTGCAGTGGCGG
chrom TTTTTTGGAGGAAGTCTCTAT----AC---TTCTTTCCATAATGTCTCTACTAGATTAC-----
right TTTTTTGGAGGAAGTCTCTAT----AC---TTCTTTCCATAATGTCTCTACTAGATTAC-----
      *****2222222**2*2*2222**2222***22*22*222*2*2222**2**2*2*22222222
  
```

Other Simple Repeat Low Complexity DNA LTR LINE SINE

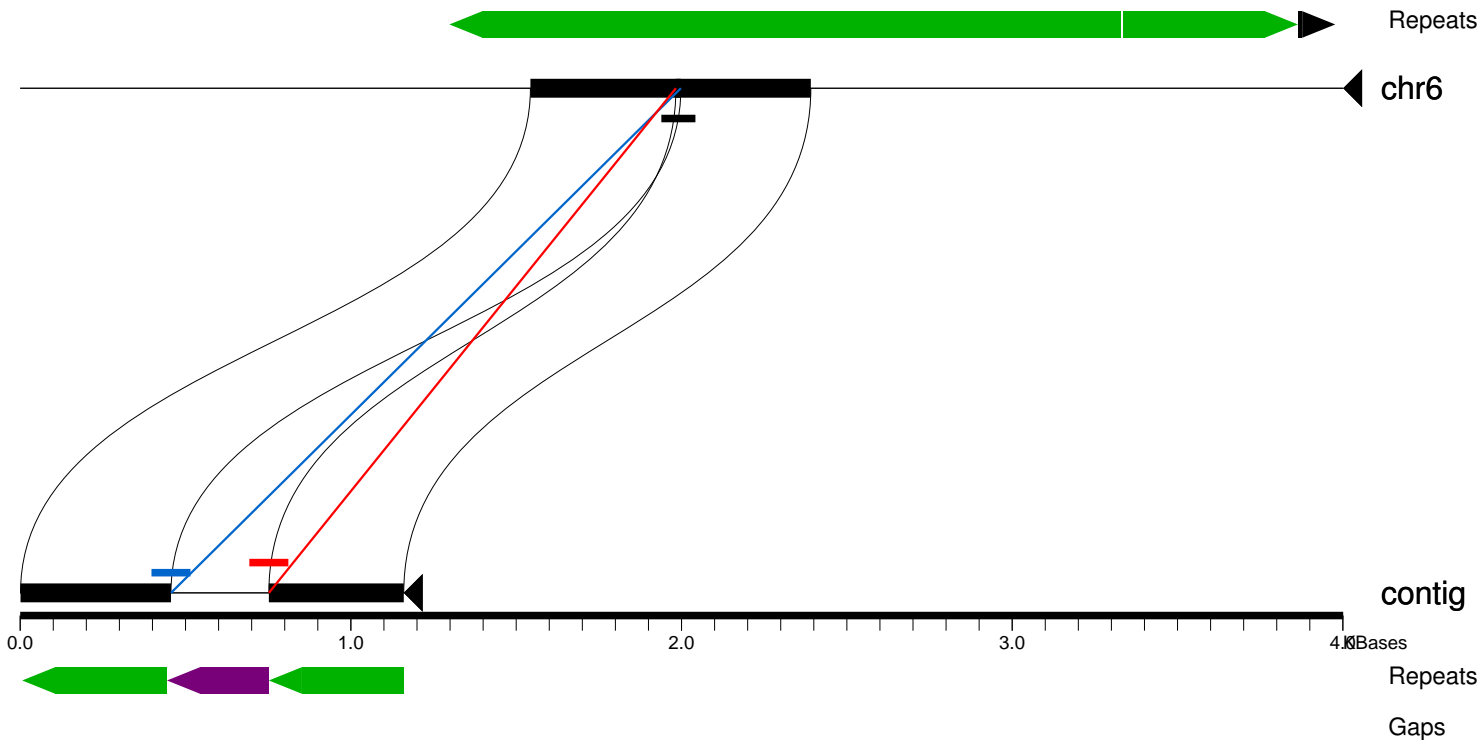



siteID: chr6\_67194338 Scaffoldig2 - Breakpoint: chr6:67194377

chr6:67194318-67194440

Overlap Length: 1 INS size: 414 Genotyped: No

```
left    CTTTACGTAATGAACTATCTCAAGGTATGTATAATCTAAAGGGAAGTAGGGATTGAAG--GNNNNNNNNN
chrom   CTTTACGTAATGAACTATCTCAAGGTATGTATAATCTAAAGGGAAGTAGGGATTGAAG--GGGAAACAT
right   CCGCC-CGCCTCGGCCT--CCCAAAGTGC-TGGGAT-TACAGGCGTG-AGCCACCGCGCCCGCCAACAT
        *11111*11111*11*11*1**1**111*111**1**1***111*1**11*11*11111*2NN22222
```

```
left    NNNNNNNNNNNNNNNNNNNNNNNNNNNNNNNNNNNNNNNNNNNNNNNNNNNNNNNNNNNNNNNNNNNNNN----
chrom   TTTGAAATAAATTAATTTTAAACTTCATTCTGTTAATGATTGTTGCTAAAATAATC
right   TTTGAAATAAATTAATTTTAAACTTCATTCTGTTAATGATTGTTGCTAAAATAATC
        22222222222222222222222222222222222222222222222222222222222222222222
```

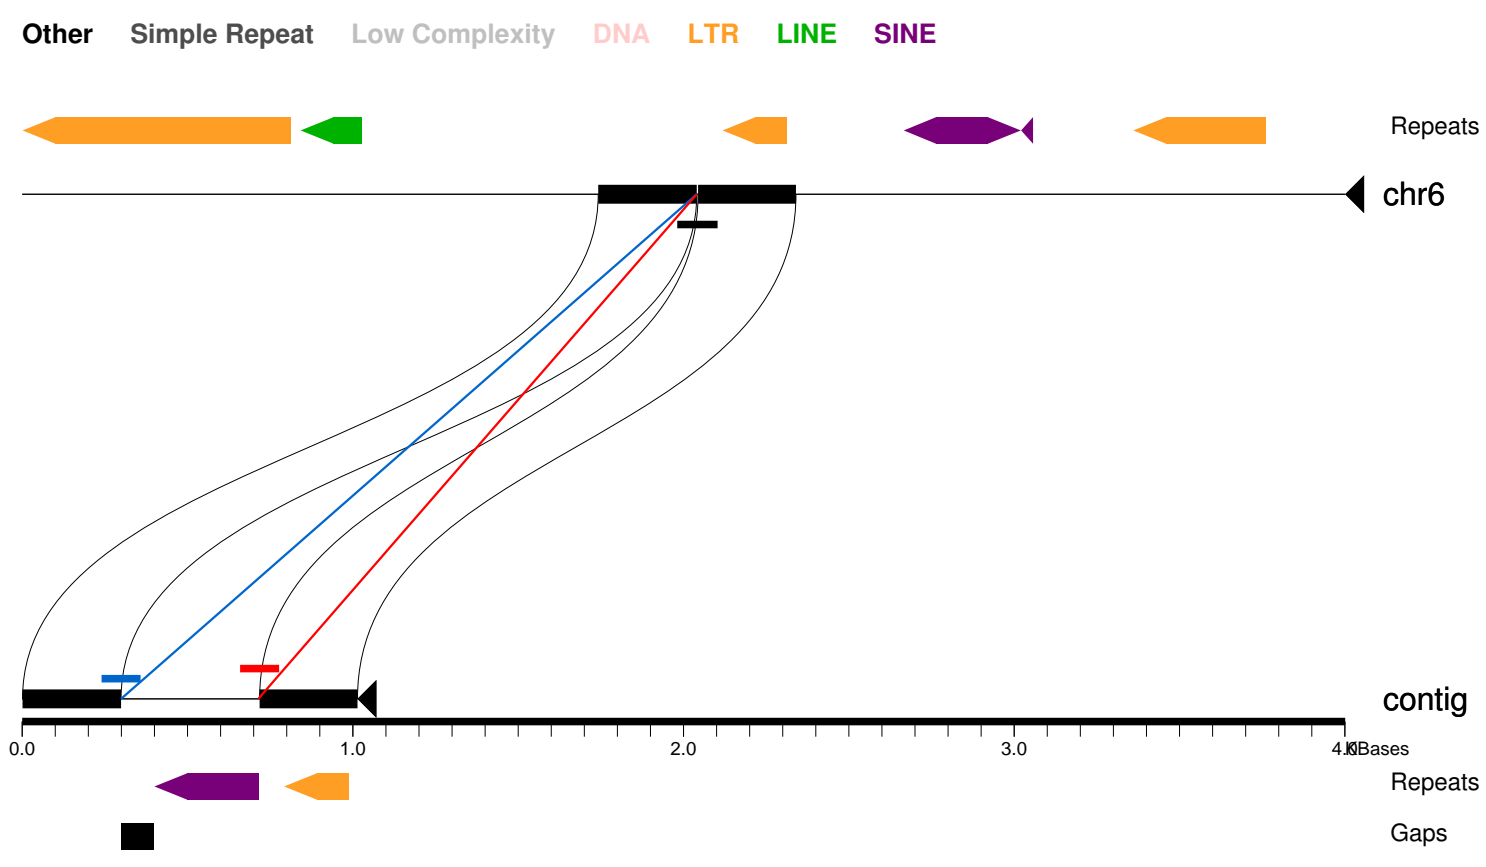

siteID: chr6\_68311289 Scaffitg3 + Breakpoint: chr6:68311296

chr6:68311252-68311355

Overlap Length: 16 INS size: 435 Genotyped: No

left TA-----CAGGGCCTCGATATTTTCTG---TATAATTTTTTGTAGGAATTTTTA---TTTTTGCCAGT  
chrom TA-----CAGGGCCTCGATATTTTCTG---TATAATTTTTTGTAGGAATTTTTA---TTTTTGCCAGT  
right GATCCACCCGCTCGGCCTCCCAAAGTGTGGGATTACAGGCGTGAGCCACCGCGCCCGTTTTTGCCAGT  
1\*1111111111\*11\*\*\*\*\*111\*11\*1\*\*\*111\*111\*1111\*1\*\*11\*1111111111\*\*\*\*\*

left ATTTTTTNNNNNNNNNNNNNNNNNNNNNNNNNNNNNNNNNNNNNNNNNNNNNNNNNNNNNNNNNNNNNNNNNNNNNN  
chrom ATTTT-----AAATGAAGTTTTAAAATGATCTCTAATTGTTGTTGCTGCCTTAT  
right ATTTT-----AAATGAAGTTTTAAAATGATCTCTAATTGTTGTTGCTGCCTTAT  
\*\*\* \*222222222222222222222222222222222222222222222222222222222222222222222222

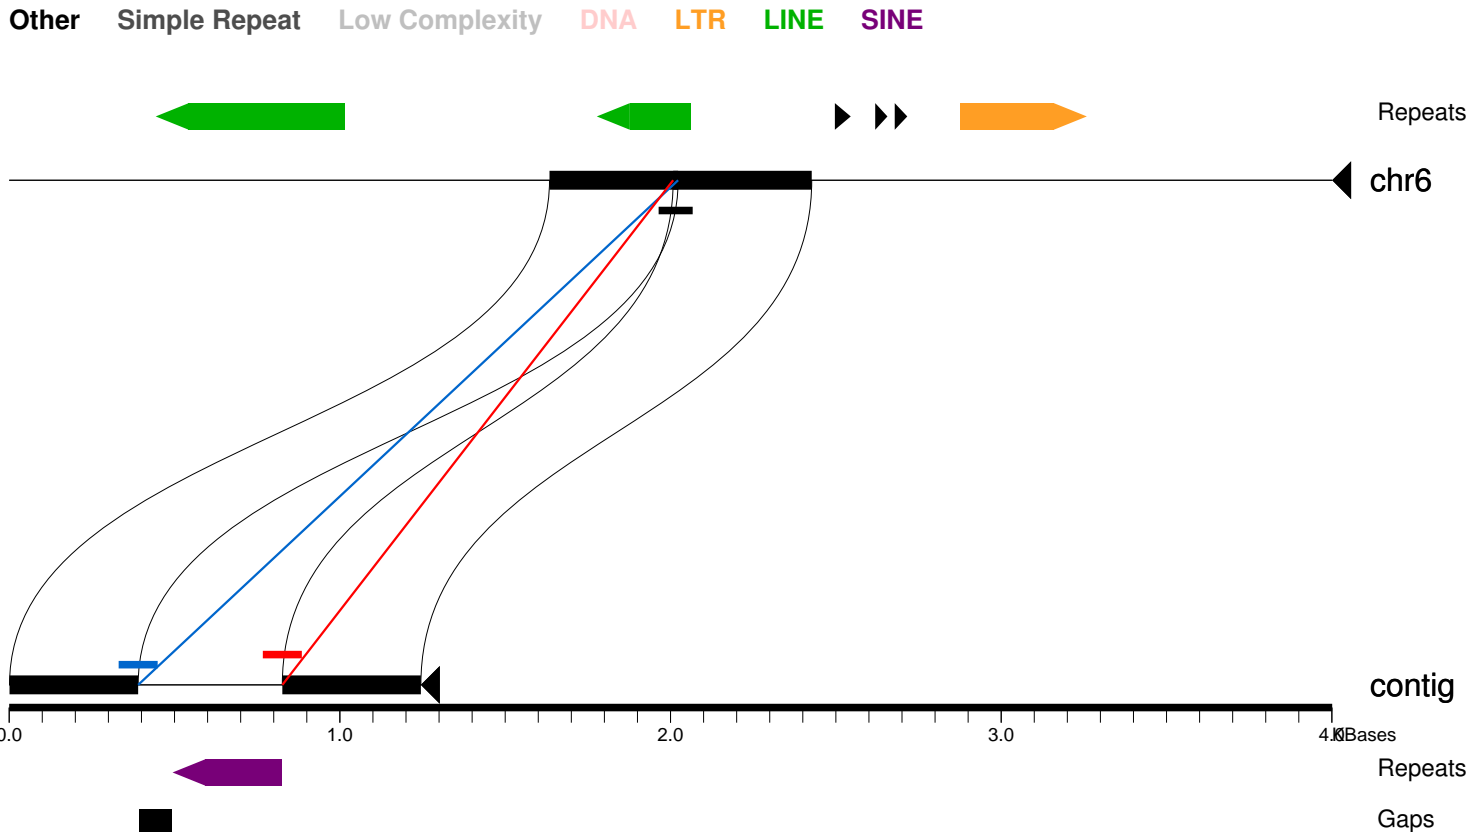

siteID: chr6\_68314076 Scaffold7 + Breakpoint: chr6:68314050

chr6:68314009-68314109

Overlap Length: 19 INS size: 299 Genotyped: Yes

```

left   C-----ATATTTATTTTGTTTTTTTATGGAAGTGA--CTTCTAGAATT---TGATTTGGTAT
chrom  C-----ATATTTATTTTGTTTTTTTATGGAAGTGA--CTTCTAGAATT---TGATTTGGTAT
right  CCGCCCGCCTCGGCCTCCCAAAGTGCTGGGATTACAGGCGTGAGCCACCGCGCCCGGCC-TGATTTGGTAT
      *11111111111111111111*1111*11*11*1111***11*111***11*11*11*11111111******
left   ATACATTTTTTTTTTTTTTTTTTTTTGAGACGGAGTCTCGCTCTGTGCGCCAGGCTGGAGTGCAGTG
chrom  ATACATTTAAGTTTAAATACACATTTA-----TCAATCT-----AAAATAGA-TAAGAAA
right  ATACATTTAAGTTTAAATACACATTTA-----TCAATCT-----AAAATAGA-TAAGAAA
      *****222***222*22222***222222222222**22***2222222*222*2**2*222222

```

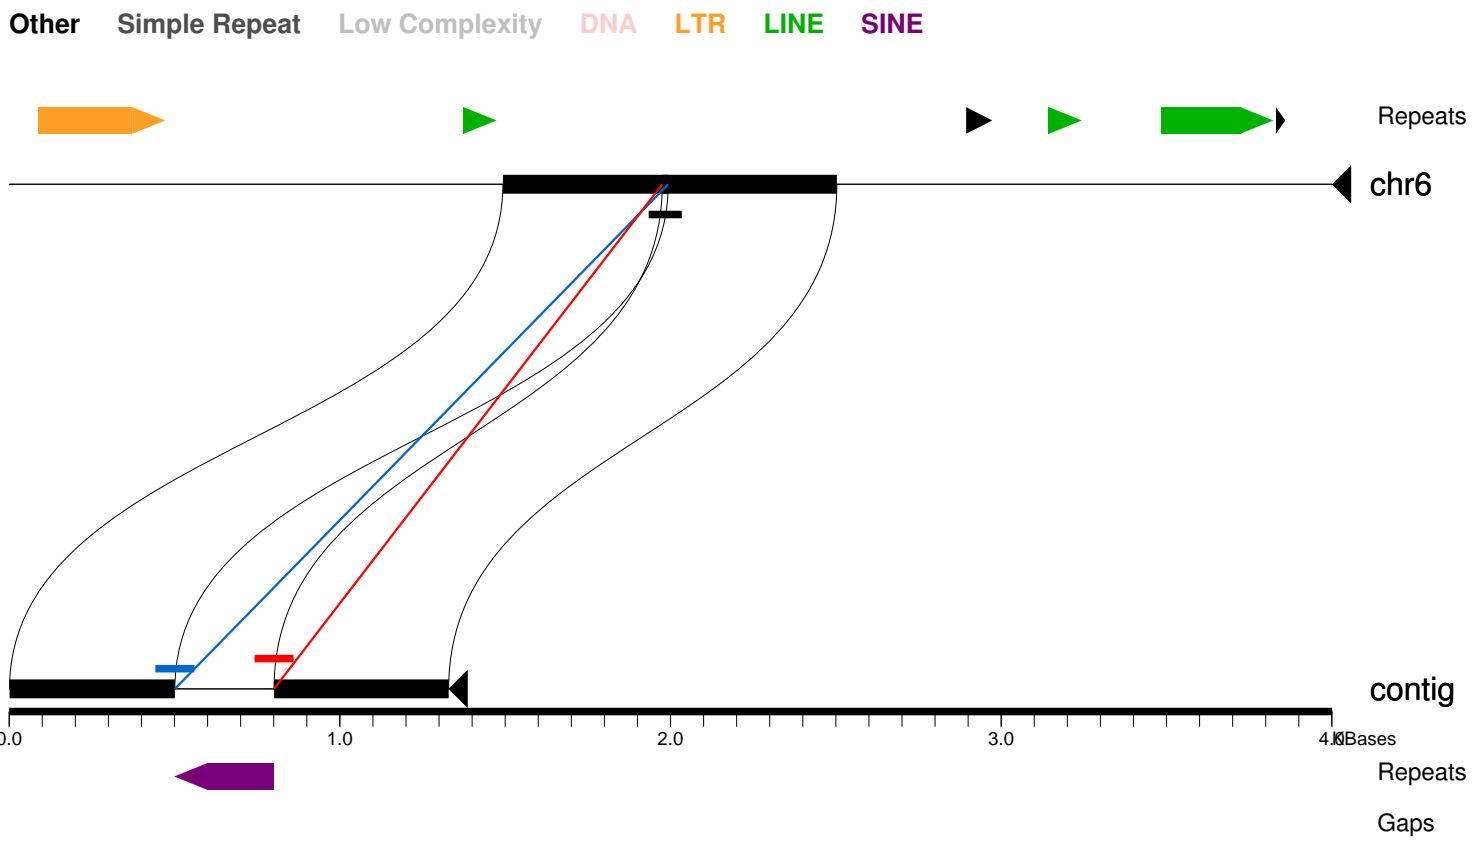



siteID: chr6\_68502419 Scaffoldig5 + Breakpoint: chr6:68502428  
 chr6:68502268-68502605  
 Overlap Length: 18 INS size: 320 Genotyped: Yes

```

left  -----GTGCTACAGAGATTTCCAAAAAGTAGAATATCCAGGTCAAAGAGTATTAAGGATAGT
chrom CTTC--AGACACTGGTGCCTACAGAGATTTCCAAAAAGTAGAATATCCAGGTCAAAGAGTATTAAGGATAGT
right TTTAGTAGACACGGG-GTTTCACCGTTTT-----AGCCGGG----ATGGTCTC---GATCTC
      N22N11222N22N2*1*1*1**11*1***1111111111111*1**1**1111*11**1*1111***111

left  TAACATTTTTTTTTTTTACCTGATCACTTTCCAGAAAAGTTTGTAGCAATTTACACTCAGAAATGAGGTTGC
chrom TAACATTTTTTTTTTTTACCTGATCACTTTCCAGAAAAGTTTGTAGCAATTTACACTCAGAAATGAGGTTGC
right TTGACCTCGTGATCCGCCCGCCTCGGCCTCCC-AAAGT--GCTGGGATTA-----CAGGCGTGAG-----
      *11111*11*11*1111**111**1111***11*****11*11*11**111111***111***11111

left  TGTTCCTCTACGATCATCATCGAAAAGTGATTATTTTTTTTATTTTTTTTATTTTTTTATTTTTTTATTTTTT
chrom TGTTCCTCTACGATCATCATCGAAAAGTGATTATTTTTTAAATTTGTCATAATCTTATGGTAAAAAATTAT
right -----CCACCGCGCCCGC--CGAAAAGTGATTATTTTTTAAATTTGTCATAATCTTATGGTAAAAAATTAT
      111111**1*11**11*11*11*11*****222**2*22*22*2**22*22*22**2*

left  TTT-----TTTTTTGAGACGGAGTCTCGCTC-TGTCGCCCAGGCTG-----GAGTG
chrom GTTACCTAAATGTCATCTAATTTACATTTCCCTCATCACACTTAGGTTGAACATTATTTTATAAAGAATA
right GTTACCTAAATGTCATCTAATTTACATTTCCCTCATCACACTTAGGTTGAACATTATTTTATAAAGAATA
      2**22222222*22*2*2*22222*2*22*2***2*22*2*22***2*22222222222222*2*2

left  CAGTGGC---GGGAT--CTC-----GGCTCACTG-----CAAGCTCCGCCTCCCG
chrom GAGAGGCCACAGTTATTACTCATAACGTATTTTCAGAGGGGAATATCAATTGCTGTAGTTAG
right GAGAGGCCACAGTTATTACTCATAACGTATTTTCAGAGGGGAATA-----
      2*2**2222*22**22**22222*22*22*2*2222222 111NNN1N1NNNNNN1
  
```

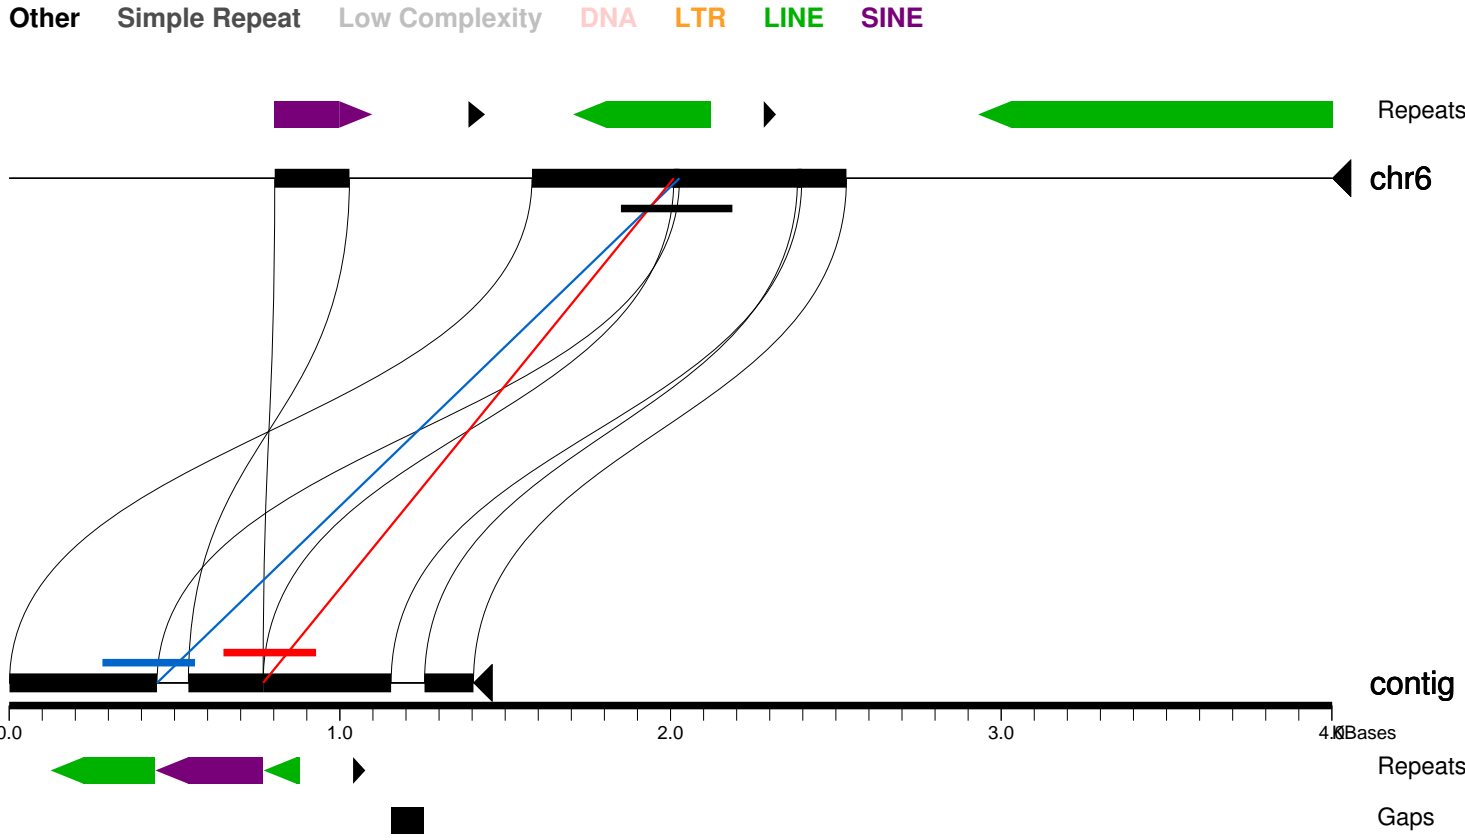

siteID: chr6\_69543470 Scafftig5 - Breakpoint: chr6:69543454

chr6:69543408-69543513

Overlap Length: 9 INS size: 437 Genotyped: No

```
left   A-AGCAG-----TTAAAAAGAAAATCAATTTCCCTTATTGTTTTTAAGTGGATA----AGTATTCTTTT
chrom  A-AGCAG-----TTAAAAAGAAAATCAATTTCCCTTATTGTTTTTAAGTGGATA----AGTATTCTTAT
right  CCACCCGCCTCGGCCCTCCCAAAGTGCTGGGATTACAGGCGTGAGCCACCGCGCCCGGCCAGTATTCTTAT
      11*1*1*11111111*111****11111111***1*11111*1111*1*11*11111111*****2*

left   TTTTNNNNNNNNNNNNNNNNNNNNNNNNNNNNNNNNNNNNNNNNNNNNNNNNNNNNNNNNNNNNNNNN
chrom  ATT-----AAAGAATGAAGTATTTGAACTTAGAATCTTCATTATCTTCTTGTTT
right  ATT-----AAAGAATGAAGTATTTGAACTTAGAATCTTCATTATCTTCTTGTTT
      2**2222222222222222222222222222222222222222222222222222222222222222222222
```

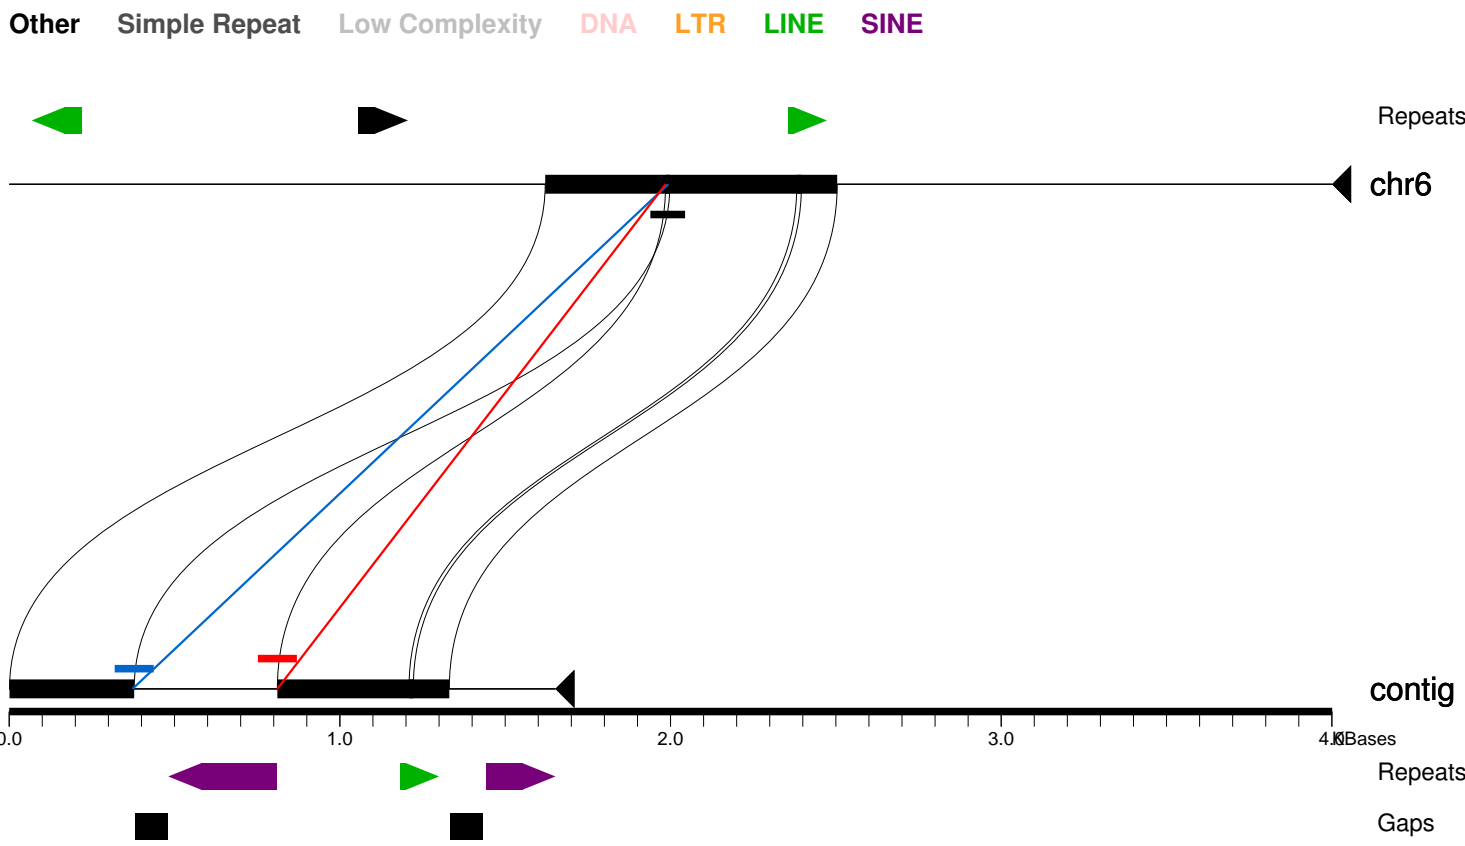



siteID: chr6\_72254381 Scaffitg1 + Breakpoint: chr6:72254372

chr6:72254212-72254542

Overlap Length: 11 INS size: 332 Genotyped: Yes

left -----TAATCTTTTATTTTTCTCATAATAGGTATCAGTACAAAAATAATGTCTTACATTTGCACAGTG  
chrom CTTGAATTAATCTTTTTATTTTTCTCATAATAGGTATCAGTACAAAAATAATGTCTTACATTTGCACAGTG  
right TTT--AGTAG-----AGACGGGGTTTACCT-----TGTTAGCCA---GGATGGT-  
N22 2N\*\*1111111111111111\*1\*111\*\*\*1\*\*\*111111111111\*\*\*1111\*\*111\*1\*11\*\*1

left CTCAGAGATTTACAAAATGCCTTCATACACTTTTATCTCATTTTATCCTTCTAATAAAAATAATAATGGAGG  
chrom CTCAGAGATTTACAAAATGCTTTTCATACACTTTTATCTCATTTTATCCTTCTAATAAAAATAATAATGGAGG  
right CTC---GATCTCCTGACCTCGTG--ATCCACC-----CGCCTCGGCCTCCCAAAGTGCTGGGATTACAGG  
\*\*\*111\*\*\*1\*1\*11\*111\*N\*11\*\*1\*\*\*1111111\*111\*111\*\*\*1\*1\*\*11111\*111\*1\*11\*\*

left CA-GAGTTTGCCATCTGTCTCTCCATTTTAAAAAAAAAAAAAAAAAAAAAAAAAAAAAAAAAAAAAAAAA  
chrom CA-GAGTTTGCCATCTGTCTCTCCATTTTAAAGTTGTAATAATTTGAGGTTTAAATGTGTGTAATAATTT  
right CGTGAGCCACCGCGCCCGGCCCTCTCCATTTTAAAGTTGTAATAATTTGAGGTTTAAATGTGTGTAATAATTT  
\*11\*\*\*1111\*11\*\*1111111\*\*\*\*\*\*2222\*\*2\*2222\*\*\*2222\*\*\*22\*2\*2\*2\*222\*2\*\*

left T-----TTTTGAGGCGGA-----GTCTCGCTCTGTGCCCC--AG-GCCGGACTGCG  
chrom TGGCCAAAAGGTCACAAAAGTGTGTAAGTGACATATTTGGTATCGATTTCTGGGCCATAAGTGCAGCACCATT  
right TGGCCAAAAGGTCACAAAAGTGTGTAAGTGACATATTTGGTATCGATTTCTGGGCCATAAGTGCAGCACCATT  
\*2222222222222222\*2\*2\*2\*\*2222\*222222\*\*2\*\*\*2\*2\*2\*2\*2\*\*22\*\*2\*2\*2\*2\*\*2222

left GACTGCAGTGGCG-----CAA-----TCTCGGCTCACTGCAAGCT-----  
chrom TTTTGCTATAGCATATTTCAAGGGTTTTTGTGTTGTTGTTGTTGTTTTTCTCG  
right TTTTGCTATAGCATATTTCAAGGGTTTTTGTGTTGTTGTTGTT-----  
222\*\*\*22\*2\*\*222222\*\*\*22222\*2\*2\*22\*222\*222N1N1

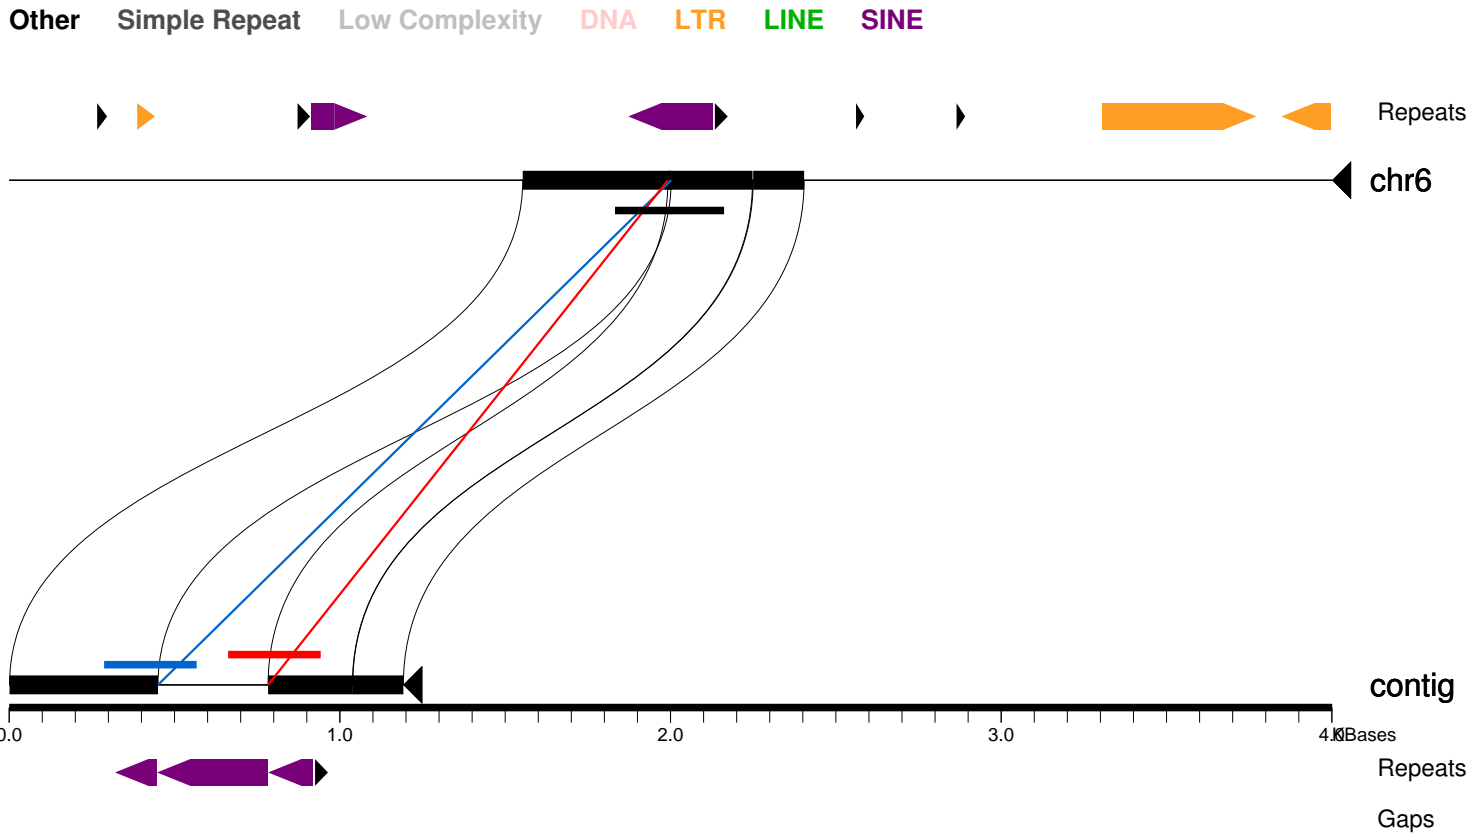

siteID: chr6\_72580478 Scaffitig3 - Breakpoint: chr6:72580483

chr6:72580437-72580542

Overlap Length: 14 INS size: 304 Genotyped: Yes

```
left  -CTCCAAAATT-----CATGTTGAAACCTAATCACAAAGGTGATGGTATTAG-----AAGATGGTTGA
chrom -CTCCAAAATT-----CATGTTGAAACCTAATCACAAAGGTGATGGTATTAG-----AAGATGGTTGA
right ACTCCAGCCTGGGCGACAGAGCGAGACTCCATCTCAAAAAAAAAAAAAAAAAAAAAAAAAAAAAAAGATGGTTGA
1*****111*1111111**1111**1**111***1****1111*1111*11*11111111******
```

```
left  GTCGCCGGGCGCGGTGGCTCACGCCTGTAATCCAGCACTTTGGGAGGCCGAGGCGGGCGGA
chrom GTCATGAGG----GAACCTCCCTCATGAATTG-----ATTA--AGGCCTTATAAAAAAGGG
right GTCATGAGG----GAACCTCCCTCATGAATTG-----ATTA--AGGCCTTATAAAAAAGGG
**2222**2222*222***2*2*2**2*2*22222222**222*****22222222**2
```

Other Simple Repeat Low Complexity DNA LTR LINE SINE

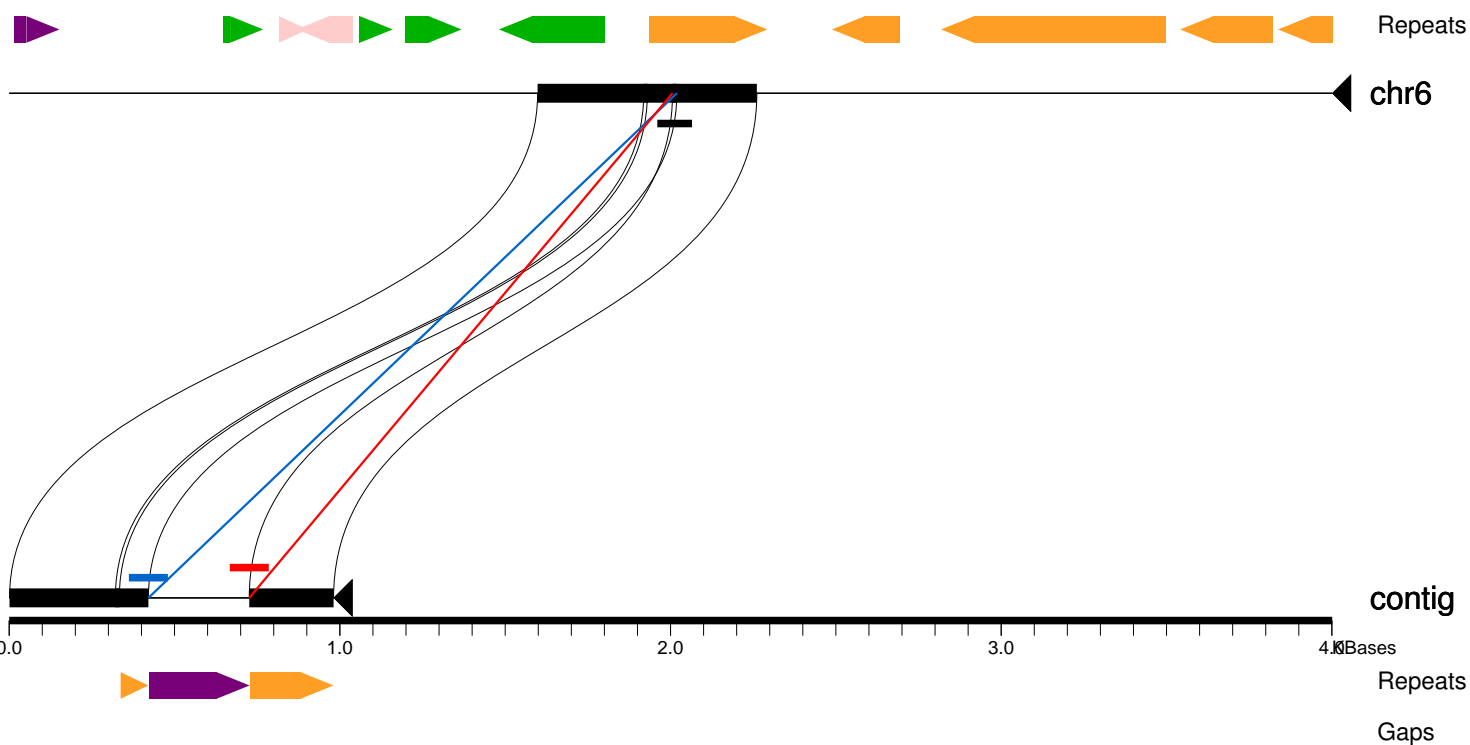

siteID: chr6\_74504862 Scaffitg11 + Breakpoint: chr6:74504838

chr6:74504678-74505015

Overlap Length: 18 INS size: 299 Genotyped: Yes

```

left  T-----GGTATATTTGTGTGCCATGCTAAACACAAAATGAGACCTTTACACATTGGCATAA
chrom TACCAAGTGGTCTCTGTGGTATATTTGTGTGCCATGCTAAACACAAAATGAGATCTTTACACATTGGCATAA
right GA-----GG---CGGGAGAATGGCGTGAACCCGGG-----AGCGGAGCTT-----
12      22      2N2N1*1**111**11**11*111111111*1111**N***111111111111111

```

```

left  TGGCTGTAATTAAGGAGATAAGTAAAAAATTATTTGGGATTGTCATGAATGAACGTTGTACCTTTTGAAAA
chrom TGGCTGTAATTAAGGAGATAAGTAAAAAATTATTTGGGATTGTCATGAATGAACGTTGTACCTTTTGAAAA
right --GCAGTGAGC--GGAGATCCCGCCACTGCACTCCAGCCTGGGC--GACAGAGCGAGACTCCGTCTCAAAA
11**1**1*1111*****111111*1111*1*111*11**1111**11**1*11111**1*1*1****

```

```

left  CAAGATTCCAATTTGTATTCAGATTTAGTTTTCTGGCCGGGCGTGGTGGCT-CAC-----GCCTG
chrom CAAGATTCCAATTTGTATTCAGATTTAGTTTTCTGGTTTTGAAGTAGAAACTACATAGGAATTAGACTG
right AAAAAAAAAAAAA---AAAAAAGATTTAGTTTTCTGGTTTTGAAGTAGAAACTACATAGGAATTAGACTG
1**1*11111**11111*1111*****222*22**2*222*2**22222222*2***

```

```

left  -----TAATC---CCAGCA--CTTTGGGA--GGCCGAGCGGGCGGATCACG-AGGTCAGGAGAT-C
chrom GTGCTTTATAATTTGGCATAACATTTCTTTGGGATAGTTTAATACAATAAGGTAAAAATATTTTCAGAAAAATGC
right GTGCTTTATAATTTGGCATAACATTTCTTTGGGATAGTTTAATACAATAAGGTAAAAATATTTTCAGAAAAATGC
22222222***2222*222*22*****22*2222*22*22222*2*2*222*22*****2*2*2*

```

```

left  GAGA-----CCATCCCGGCTAAA-----ATGG--TGAAACCCCGTCTCTACTAC-A
chrom CACATATAACTCCATATTTACATATGCTTTATGAACTGTAACCTCGGCTAAATCAAATA
right CACATA--ACTCCATATTTACATATGCTTTATGAACTGTAACTC-----
2*2*22  222***22222*22*222222***222*2***2*N1N11NNN1N1N 1

```

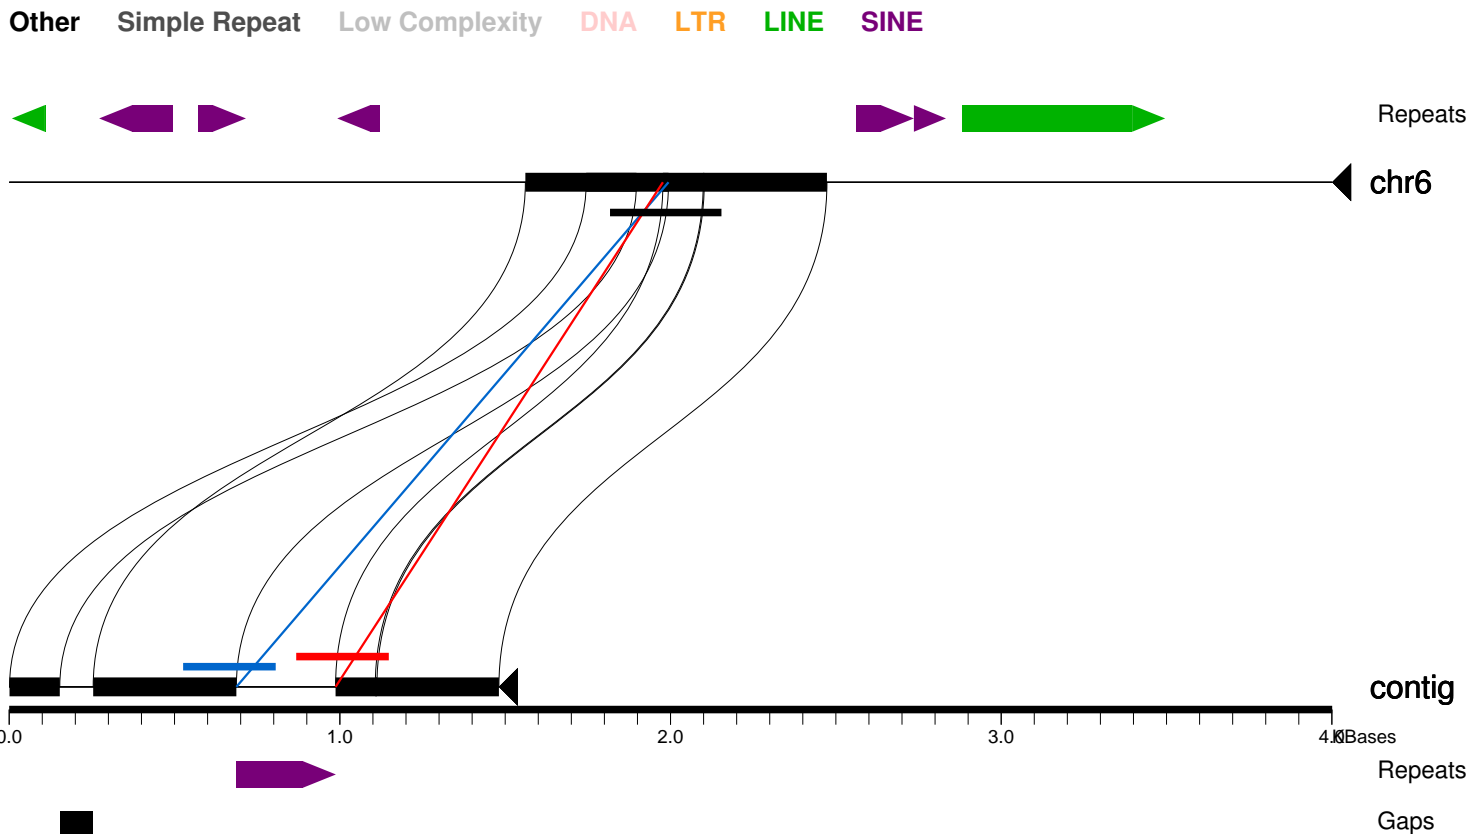

siteID: chr6\_75338250 Scaffitg1 + Breakpoint: chr6:75338221

chr6:75338061-75338396

Overlap Length: 16 INS size: 427 Genotyped: No

|       |                                                                         |
|-------|-------------------------------------------------------------------------|
| left  | CA-----CACCAAAATATAAAAGACAGATAAACACTATGAAGAACTGCATCAAATAATGTG           |
| chrom | CAGCTACTGCAAAAACACACCAAAATATAAAAGACAGATAAACACTATGAAGAACTGCATCAAATAATGTG |
| right | NNNNNNNNNNNAAAAA-----                                                   |
|       | 11NNNNNNNNNN2222N21111111111111111111111111111111111111111111111111     |

|       |                                                                        |
|-------|------------------------------------------------------------------------|
| left  | CAAAATAACCAGCTAGCATCATGACGACAGGATCAAATTCACACATAGCAATACTAACCTTAAATGTAAA |
| chrom | CAAAATAACCAGCTAGCATCATGACGACAGGATCAAATTCACACATAGCAATACTAACCTTAAATGTAAA |
| right | -----                                                                  |
|       | 1111111111111111111111111111111111111111111111111111111111111111111111 |

|       |                                                                           |
|-------|---------------------------------------------------------------------------|
| left  | TGGGCTAAGTGCCCAAAATPAAAAAGACACAGACTGG-----GCCGGGCGC---GGTG-G              |
| chrom | TGGGCTAAGTGCCCAAAATTAAAAGACACAGACTGGCAAATTTGGATAAAAGAGTCAACAACCATTTGGTGTG |
| right | -----AAAAGACACAGACTGGCAAATTTGGATAAAAGAGTCAACAACCATTTGGTGTG                |
|       | 1111111111111111111111111111111111111111111111111111111111111111111111*   |

|       |                                                                        |
|-------|------------------------------------------------------------------------|
| left  | CTCACGCTGTAATCCAGCACTT-TGGGAGGCCG-----AGGC-----GGCGGATCACGAGG          |
| chrom | CTGTATTCAGGAGACCCATCTCATGTGCAAAGACACACATAGGCTCAAAAAAAGGGATGGAGGAAAAAT  |
| right | TTGTATTCAGGAGACCCATCTCATGTGCAAAGACACACATAGGCTCAAAAAAAGGGATGGAGGAAAAAT- |
|       | 1*22222*2*2*22***2*2*2*2**22*2*2*22222***2222222222**22***22*22*2N     |

|       |                                                            |
|-------|------------------------------------------------------------|
| left  | TC---AGGAGATCGAGACCATCCTGGCTAACACGG--TGAAACCCTGTCTCTACTAAA |
| chrom | TACCAAGCAAATGGAAAGCA--CAAAATAGCAGGGGTTGCAATACTAGTTCTGACAAA |
| right | -----                                                      |
|       | 1N 11N1N11N11N1N11221NNNN11N1N11 11N11NN11NNN111NNN111     |

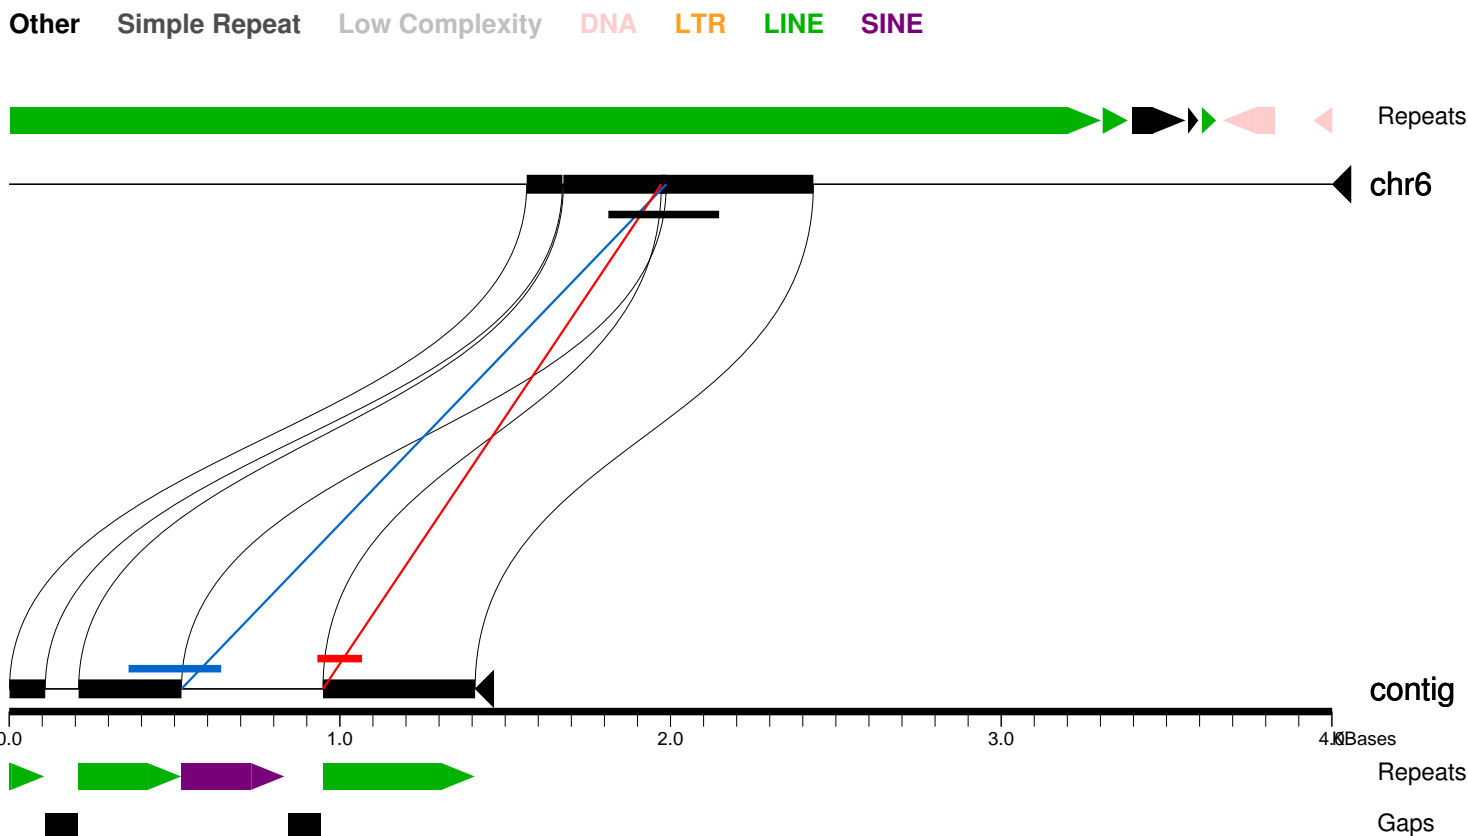

siteID: chr6\_77548623 Scaffold12 + Breakpoint: chr6:77548608

chr6:77548448-77548781

Overlap Length: 14 INS size: 452 Genotyped: No

left A-----GCTAATGTTCTGCATAATAATGTGAAAAGAATTGAAATGCAGAAATTTTCAGAG  
 chrom AACTGGGTAGCAGGCTAATGTTCTGCATAATAATGTGAAAAGAATTGAAATGCAGAAATTTTCAGAG  
 right NNNNNNNNNNA-----AAAA-----AAAAAA-----  
 1NNNNNNNNN2 1111111111111111111111111111111111111111111111111111111

left GAAAGATTCCCTGCACAGCTTGGCAGAAAAATGAGCACCGTCTTTTAAAGAAAAGATGGTTAAGTCTTAAAG  
 chrom GAAAGATTCCCTGCACAGCTTGGCAGAAAAATGAGCACCGTCTTTTAAAGAAAAGATGGTTAAGTCTTAAAG  
 right -----  
 11111111111111111111111111111111111111111111111111111111111111111111

left CCTCATATTTAGTAACTTTAAAGCTTATCTTTGCCGGGCGGGTGGCTCACGCCTG-----TAATCCC  
 chrom CCTCATATTTAGTAACTTTAAAGCTTATCTTTACTTTCAATACTTAA-TGAAGGCTGCTACATATTCAA  
 right -----AAAGCTTATCTTTACTTTCAATACTTAA-TGAAGGCTGCTACATATTCAA  
 11111111111111111111111111111111111111111111111111111111111111111111\*  
 \*\*\*\*\*2\*22222222\*222\*2\*2\*2\*\*\*2222\*2\*22

left AGC-----ACTTTGGGAGGCTGAGGCGGGTG-----GATC-----ATG-----AGGTCAGGAGATCGA  
 chrom AGATAAATATTAATGAAGTCATCTTGGGGTGCTATGATCTTAACATGTCCCCAAAATTCATGTGTTGGA  
 right AGATAAATATTAATGAAGTCATCTTGGGGTGCTATGATCTTAACATGTCC-----  
 \*\*222222\*2\*222\*2\*\*2\*222222\*\*\*\*\*2222\*\*\*2222\*\*\*222 1NN111N1N1N1N11

left GAC-----CATCCTGGCTAACA-----AGGTGAAACCCCGTCTCTACTAAAA  
 chrom AACTTAATCACCAATGCCAACGGTGTTGGGAGGTGGTGGGGACTTTCAAGAGATG  
 right -----  
 N11 11N1NNN11N11N 11111NNNNNNN1N1N1NNN1N

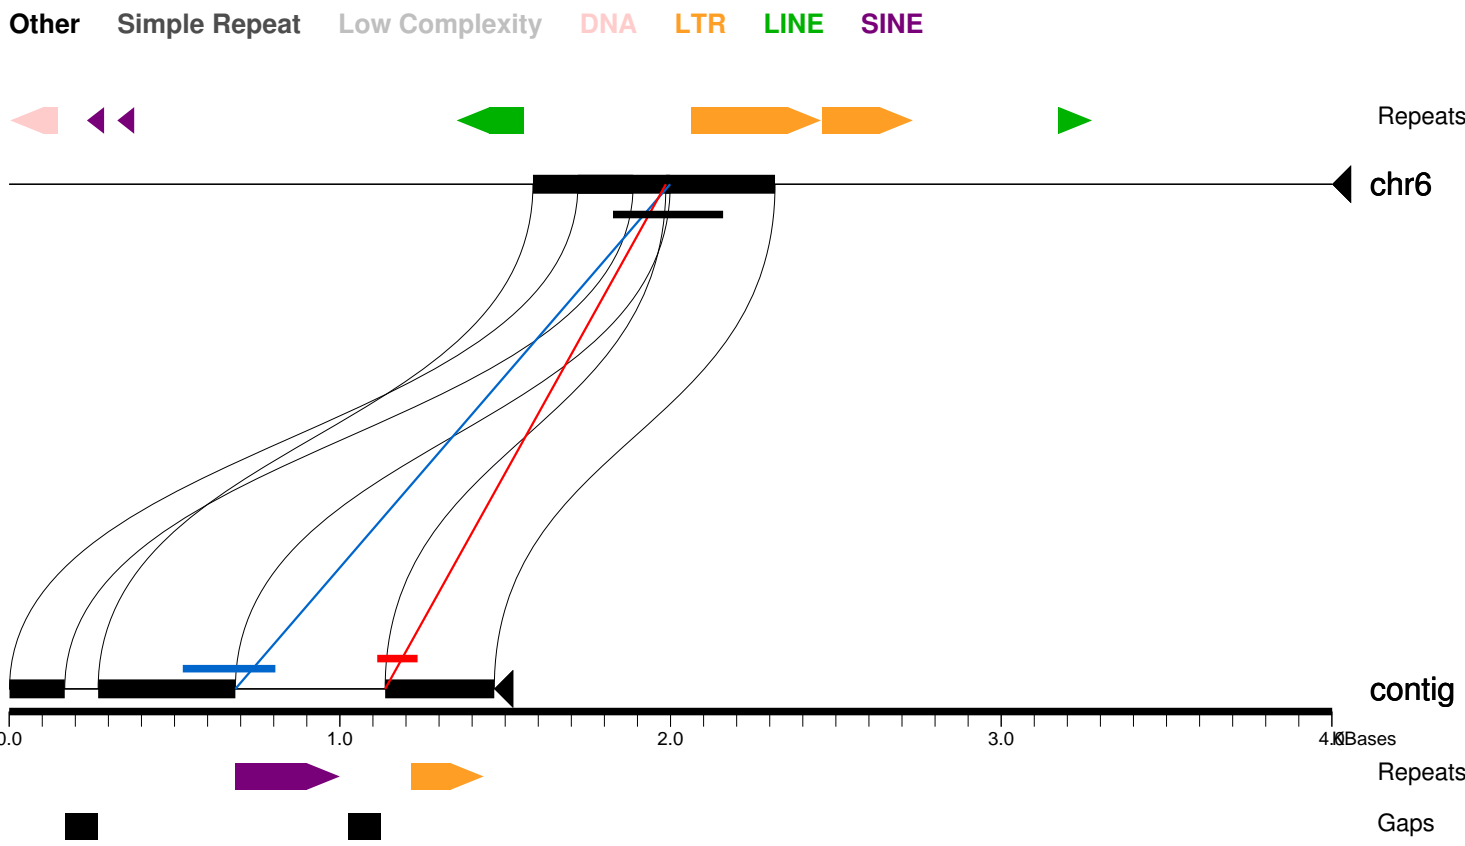



siteID: chr6\_78364264 Scaffitg5 - Breakpoint: chr6:78364255

chr6:78364212-78364314

Overlap Length: 17 INS size: 459 Genotyped: No

```
left   TCTTTATCCATAG-----ATTCAAACCAACCACAGATTGAATATGTTTAAAAAATTGAA
chrom  TCTTTATCCATAG-----ATTCAAACCAACCACAGATTGAATATGTTTAAAAAATTGAA
right  NNNNNNNNNNNNNNNNNNNNNNNNNNNNNNNNNNNNNNNNNNNNNNNNNNNNNNNNNNNNNNN
1111111111111111111111111111111111111111111111111111111111111111
*11**11*1*1*111**1*11111*****

left   AACAAATGGGCGCGGTGGCTCACGCCTGTAATCCACAGCACTTTGGGAGGCCGAGGCGGGCGGATCA
chrom  AACAAATAAT-----ACAACACTAAAAAATAAT-----GAATAAAAGTACTACTACTGT
right  AACAAATAAT-----ACAACACTAAAAAATAAT-----GAATAAAAGTACTACTACTGT
*****2222222222222222**22*22***2222*22*222222**222222**22222*222*22
```

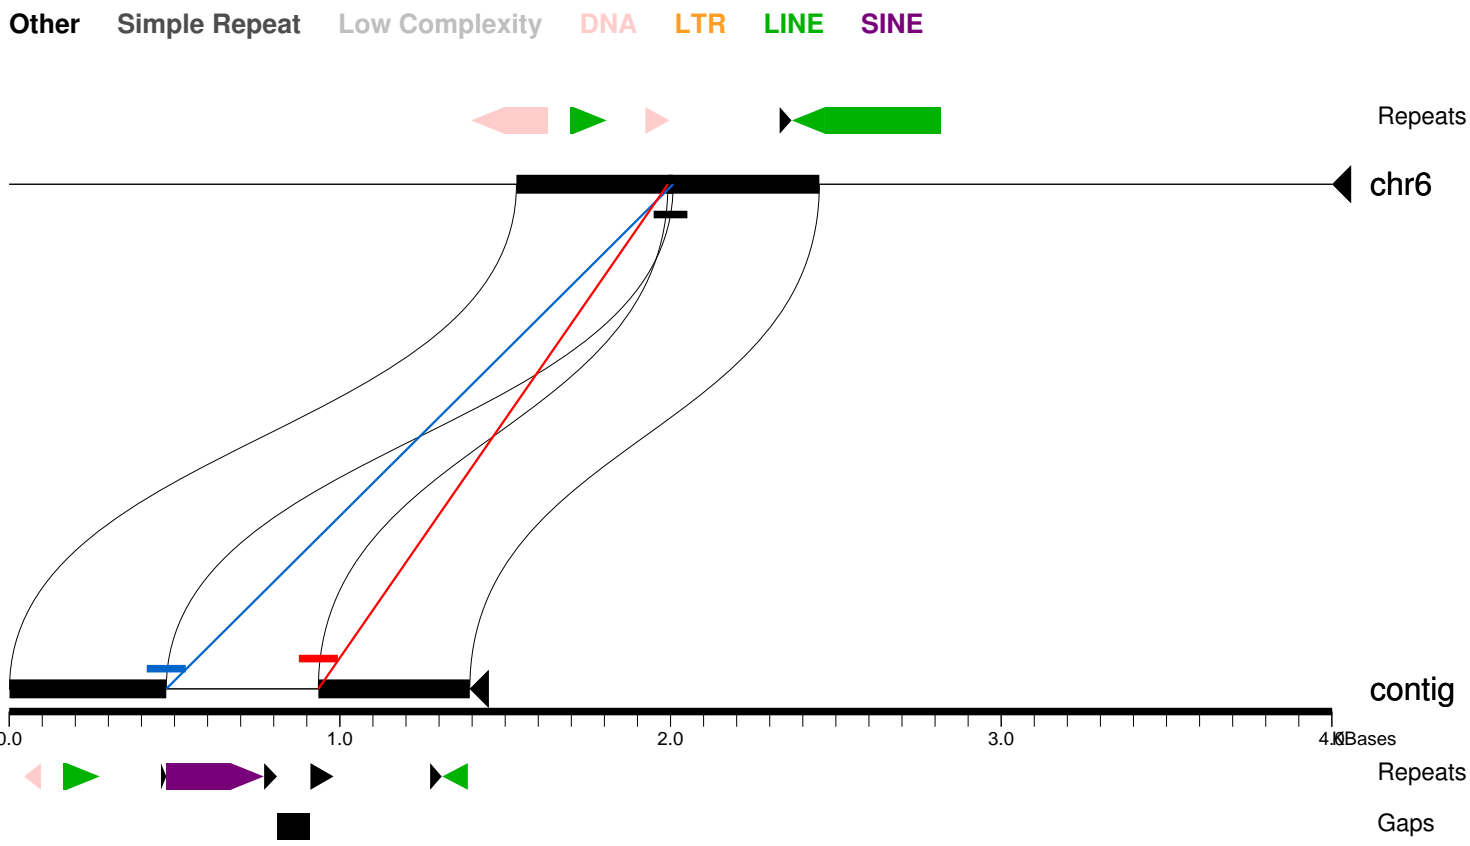

siteID: chr6\_78416747 Scaffitg2 - Breakpoint: chr6:78416754

chr6:78416710-78416813

Overlap Length: 16 INS size: 305 Genotyped: Yes

```
left   TGT---GACGTTGCTATAAAG--ATAC-CTG-----AAAATGTGGATGTGGTTTTGAAAGTGGGCA
chrom  TGT---GACGTTGCTATAAAG--ATAC-CTG-----AAAATGTGGATGTGGTTTTGAAAGTGGGCA
right  ACTCCAGCCTGGGCGACAGAGCGAGACTCCGTCTCAAAAAAAAAAAAAAAAAAAAAAAAAAAAAAGAAAGTGGGCA
      11*111*1*111**1*1*1**11*1**1*1*1111111111****11111*1111111111*****
```

```
left   ATGGGCGCCGGGCGCGGTGGCTCACGCCTGTAATCCCAGCACTTTGGGAGGCCGAGGCGGGCGGA
chrom  ATGGG-CAGAGTTTGGGAGA----GTTTGGAG----AGC---TAAGAAG---AAGACAGGAAGC
right  ATGGG-CAGAGTTTGGGAGA----GTTTGGAG----AGC---TAAGAAG---AAGACAGGAAGC
      ****2*2*2*222**22*22222*22**2*22222***222*22*2**2222**2*2**22*2
```

Other Simple Repeat Low Complexity DNA LTR LINE SINE

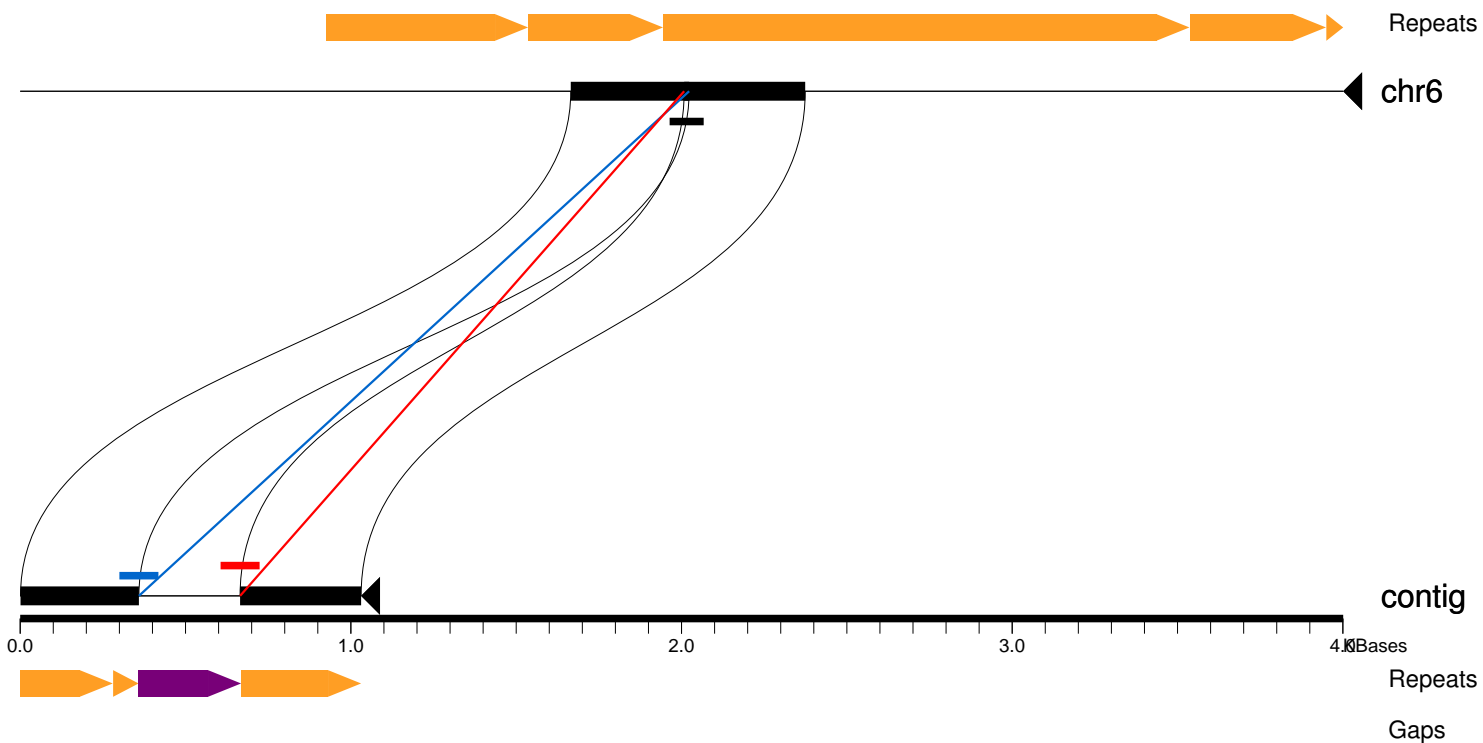



siteID: chr6\_78843181 Scaffitig9 + Breakpoint: chr6:78843172

chr6:78843012-78843344

Overlap Length: 13 INS size: 281 Genotyped: Yes

```
left -----CAGAAATGGAACATGGGAGGGGACAAATAAGGAAATAAAAAGCTGGCCACCCCAGCTAGCA
chrom TCTGATAGGACAGAAATGGAACATGGGAGGGGACAAATAAGGAAATAAAAAGCTGGCCACCCCAGCTAGCA
right TAATTTT-----TGTATTTTTTAGTAGAGAC-----GGGGTTTCACCGTGT-----AGCCAGGA
2NNNN2N 111111**1*111*11*11*1***111111**111*11*111**11111111***1**1*
```

```
left GTGGCAACCCACTTGGGTCCCTTCCATGCAGTGAAAGCTTTGTTTTTTTTGTTCTTCACAATAAACCTTG
chrom GTGGCAACCCACTTGGGTCCCTTCCATGCAGTGAAAGCTTTGTTTTTTTTGTTCTTCACAATAAACCTTG
right TGGTC-----TCGATCTCCTGACCTC--GTGA----TCCGCCCGTCTCGGCCTCCCAAAGTGC--TG
11*1*11111111*1*1**1***11*1*111***1111*11*1111*1*111*1**1***1111*11**
```

```
left CTACTGCCCACTCTTTGGGTCCCTGCCATCTTTTTTTTTTTTTTTTTGAG-ACGG-----AGTTTC
chrom CTACTGCCCACTCTTTGGGTCCCTGCCATCTTTAAGAGCTGTAACACTCACCGCACAGGTCCACAGCTTC
right GGATTACAGGC-----GTGACCTGCCATCTTTAAGAGCTGTAACACTCACCGCACAGGTCCACAGCTTC
11*1*1*111*111111*1*1***********222222*2*22222*2222*2**2*222222**2***
```

```
left GTTCT----GTCGCCCAGGCTGGAGTGC-AGTGGCGTGA-----TCTTGACTCACT----GCAAGCTCC
chrom ATTCTTGAAGTCAATGAGACCACAAACCCACTGGAAGGAACCAATTCTGGACACAATTTGGTGCCCACTCA
right ATTCTTGAAGTCAATGAGACCACAAACCCACTGGAAGGAACCAATTCTGGACACAATTTGGTGCCCACTCA
2****2222***2222**2*222*222*2*2***222**222222***2***2**2*2222**222***2
```

```
left G-----CC----TCCCGGG-----TTCACGCCA----TTC-TCCTGCCTCAG-
chrom GGATTTCCAAGTTCGAGGGAATTGTTTCAGGCTACGGTTTCATCATGGGACAAT
right GGATTTCCAAGTTCGAGGGAATTGTTTCAGGCTACGGTTTCATC-----
*22222**2222**22***22222***2**2*2222***2**N11NNN11N
```

Other Simple Repeat Low Complexity DNA LTR LINE SINE

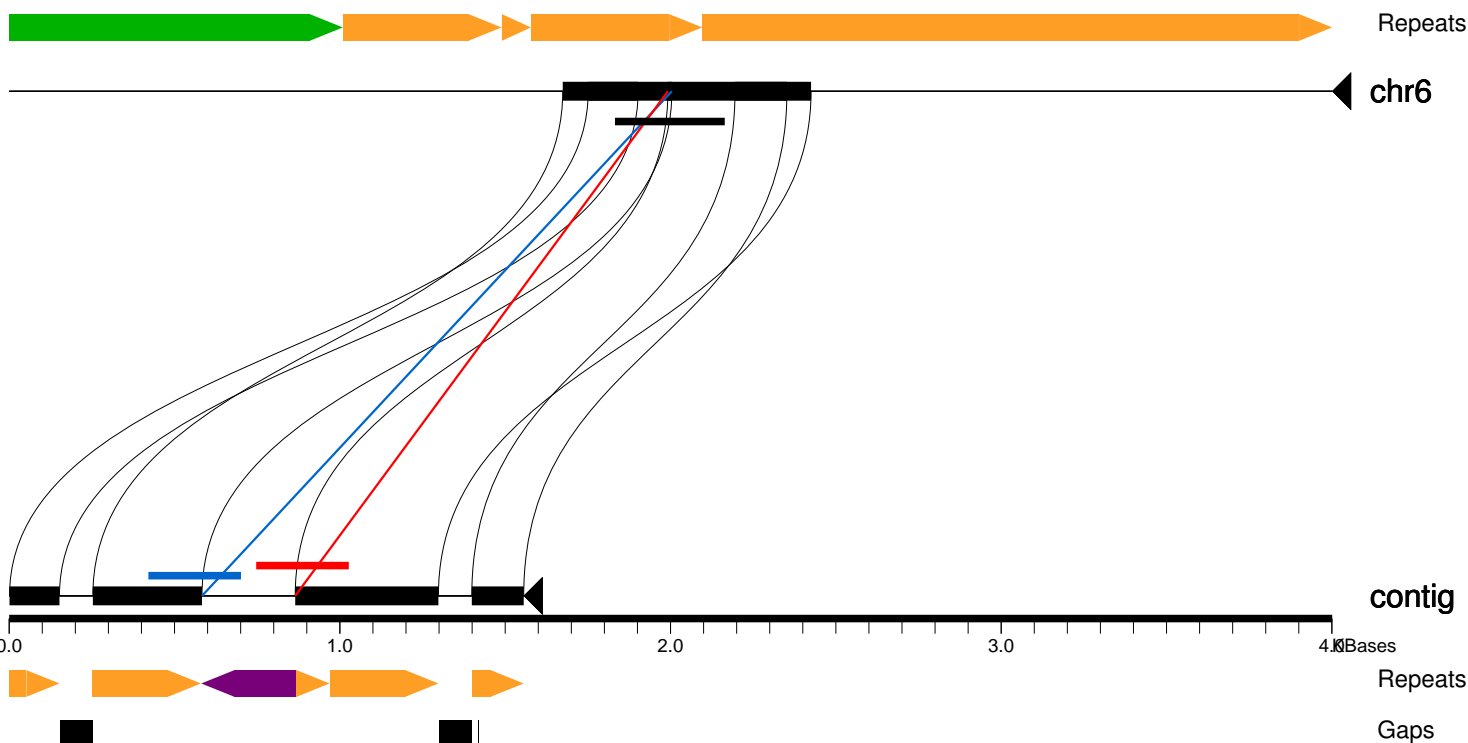

siteID: chr6\_79723803 Scaffitig1 - Breakpoint: chr6:79723785

chr6:79723740-79723844

Overlap Length: 15 INS size: 379 Genotyped: No

```
left  GTGCACACCAA-----TAATTAACACTGTTTTCTAGAAATAGAGGGTTT-----TACAAACCTTA
chrom GTGCACACCAA-----TAATTAACACTGTTTTCTAGAAATAGAGGGTTT-----TACAAACCTTA
right GCGCCCGCCACTACGCCC GGCTAATTTTTTGTATTTTTTAGTAGAGACGGGGTTTACCGTACAAACCTTA
      *1**1*1**111111111111*****11111*1****1111*1*1*11*****11111******
```

```
left  TTTNNNNNNNNNNNNNNNNNNNNNNNNNNNNNNNNNNNNNNNNNNNNNNNNNNNNNNNNNNNNNNNNNNNN
chrom TTTCTTACCTAATGTATTCTAAGGCACAGCCTTAAAGATAGCTAAAGCT-----
right TTTCTTACCTAATGTATTCTAAGGCACAGCCTTAAAGATAGCTAAAGCT-----
      ***222222222222222222222222222222222222222222222222222222222222222222
```

Other Simple Repeat Low Complexity DNA LTR LINE SINE

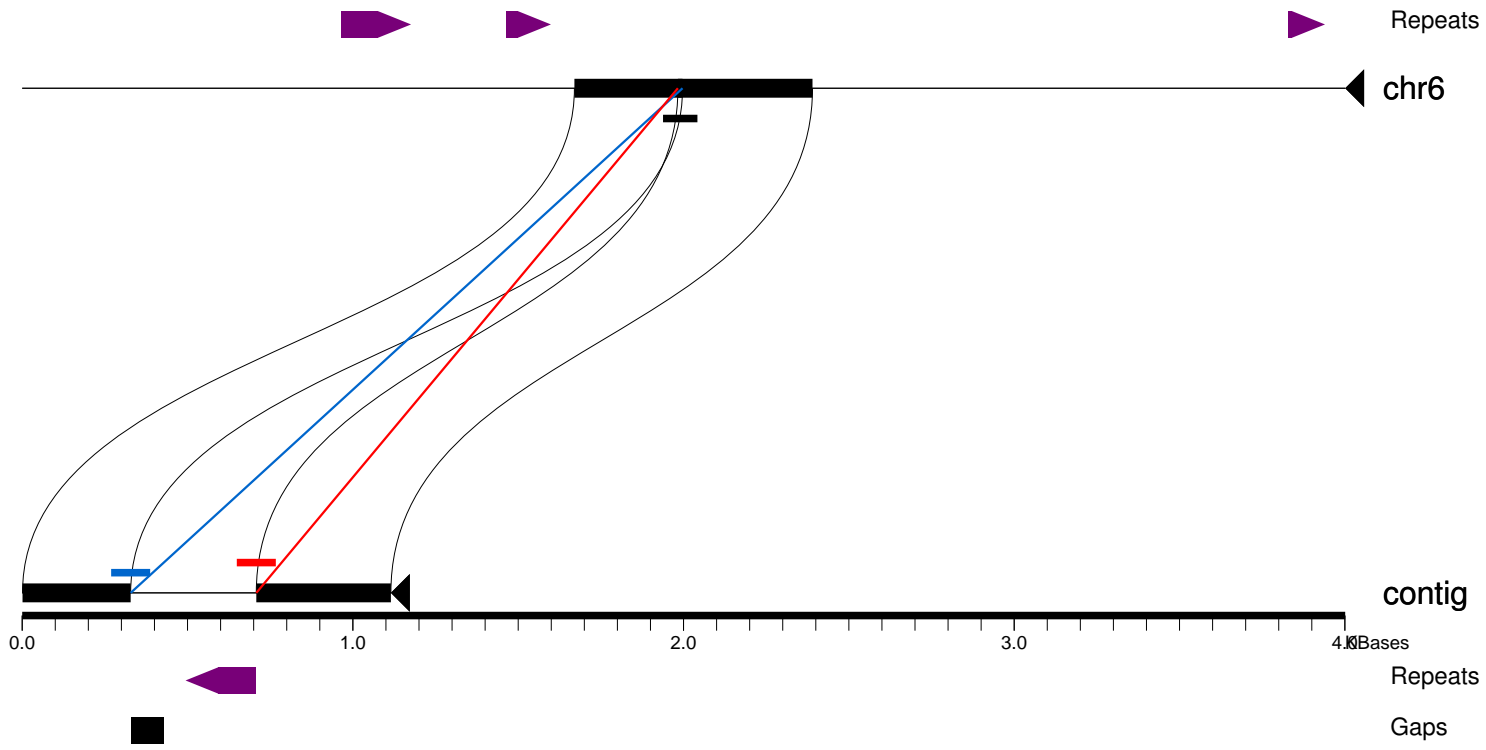

siteID: chr6\_80086786 Scaffitg1 + Breakpoint: chr6:80086746

chr6:80086695-80086805

Overlap Length: 9 INS size: 422 Genotyped: No

```
left AAA----TATTAGACTTAGAATGTTGTTTGCATTAC-----TAATCATCAGCGCTCTCATAAAGTCAAAN
chrom AAA----TATTAGACTTAGAATGTTGTTTGCATTAC-----TAATCATCAGCGCTCTCATAAAGTCAAAG
right CCACCCGCCTCGGCCTCCCAAAGT-GCTGGGATTACAGGCGTGAGCCACCGCGCCCGGCCAAAGTCAAAG
      11*111111*11*1**111**1**1*1*1*****11111*1*1*11*1****1*1111*****2
```

```
left NNNNNNNNNNNNNNNNNNNNNNNNNNNNNNNNNNNNNNNNNNNNNNNNNNNNNNNNNNNNNNNNNNNNNNNNN
chrom TTTTATTCTTTCTTACTATTTCAGATGTTTACTCTCCAGTCATGCTTCAC-----
right TTTTATTCTTTCTTACTATTTCAGATGTTTACTCTCCAGTCATGCTTCAC-----
      22222222222222222222222222222222222222222222222222222222222222222222
```

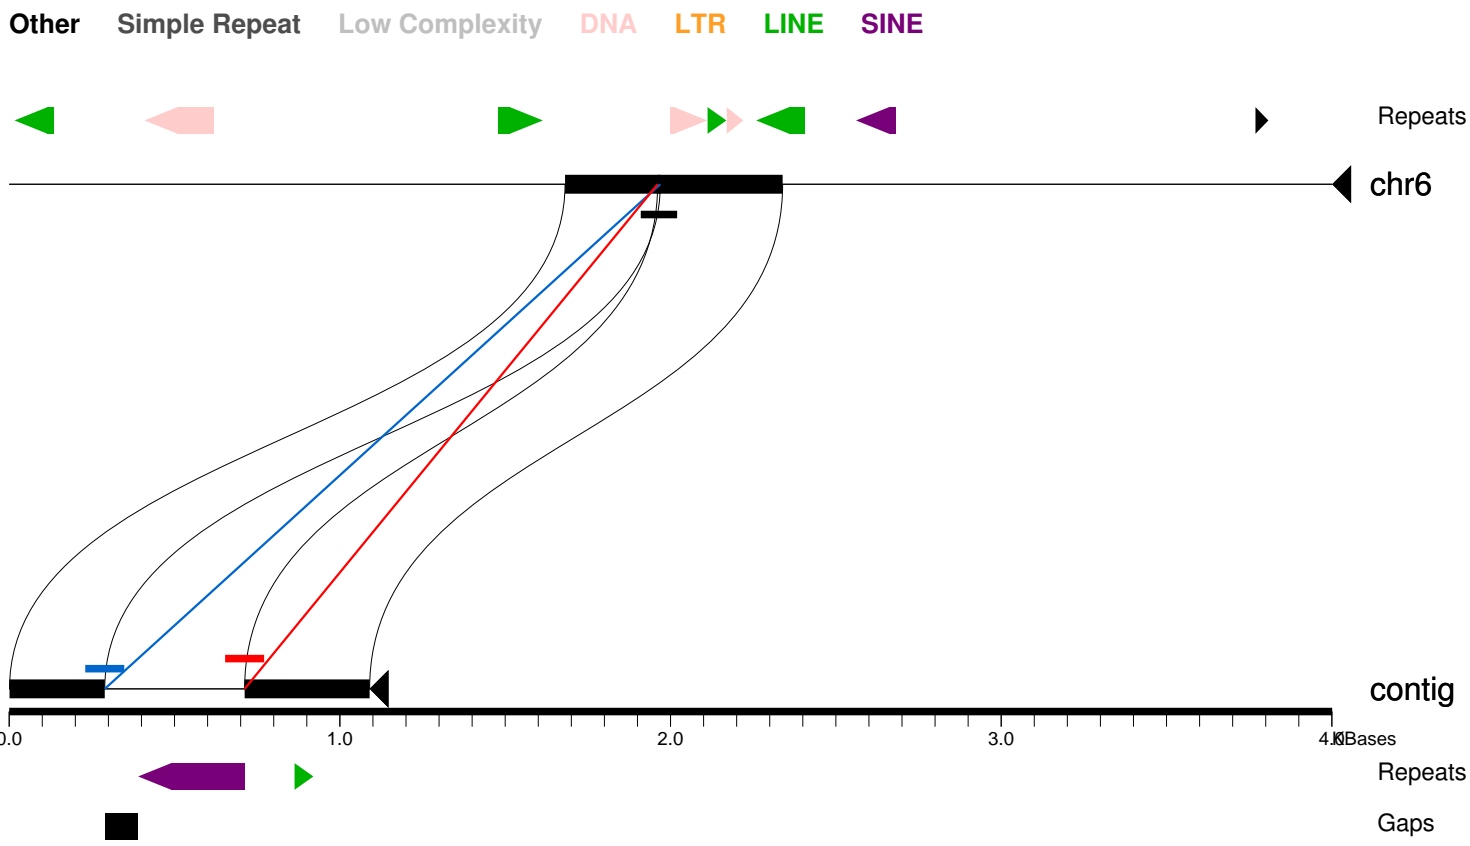

siteID: chr6\_81381045 Scaffitg5 - Breakpoint: chr6:81381047

chr6:81381002-81381089

Overlap Length: 15 INS size: 299 Genotyped: Yes

```
left  ---GCTCATATCT-----TAAATAATGGAATACA-----ATAAAAGAGTAAA
chrom ---GCTCATATCT-----TAAATAATGGAATACA-----ATAAAAGAGTAAA
right TGAGCCGAGATCGCGCCACTGCACTCCAGCCTGGGCGACAGAGCGAGACTCCGTCTCAAAAAAAAAAAAAA
      111**11*1***111111111111111*11*111***111***111111111111111111*1****1*11***
```

```
left  ATAGTTAAAAACATAGCTTAGGCCGGGCGCGGTGGCTCACGCCTGTAATCCCAGCACTTTGGGAGGCCGA
chrom ATAGTTAAAAACATAGCTTAG-----TGA-----AATGTAA----ATTAATATATGAAGACAA
right AAAAAA AAAAACATAGCTTAG-----TGA-----AATGTAA----ATTAATATATGAAGACAA
      *1*111******2222222222**2222222222*****2222*22*2*2*22**2*2*2*
```

```
left  GCGGGGCGGA
chrom -----
right -----
      2222222222
```

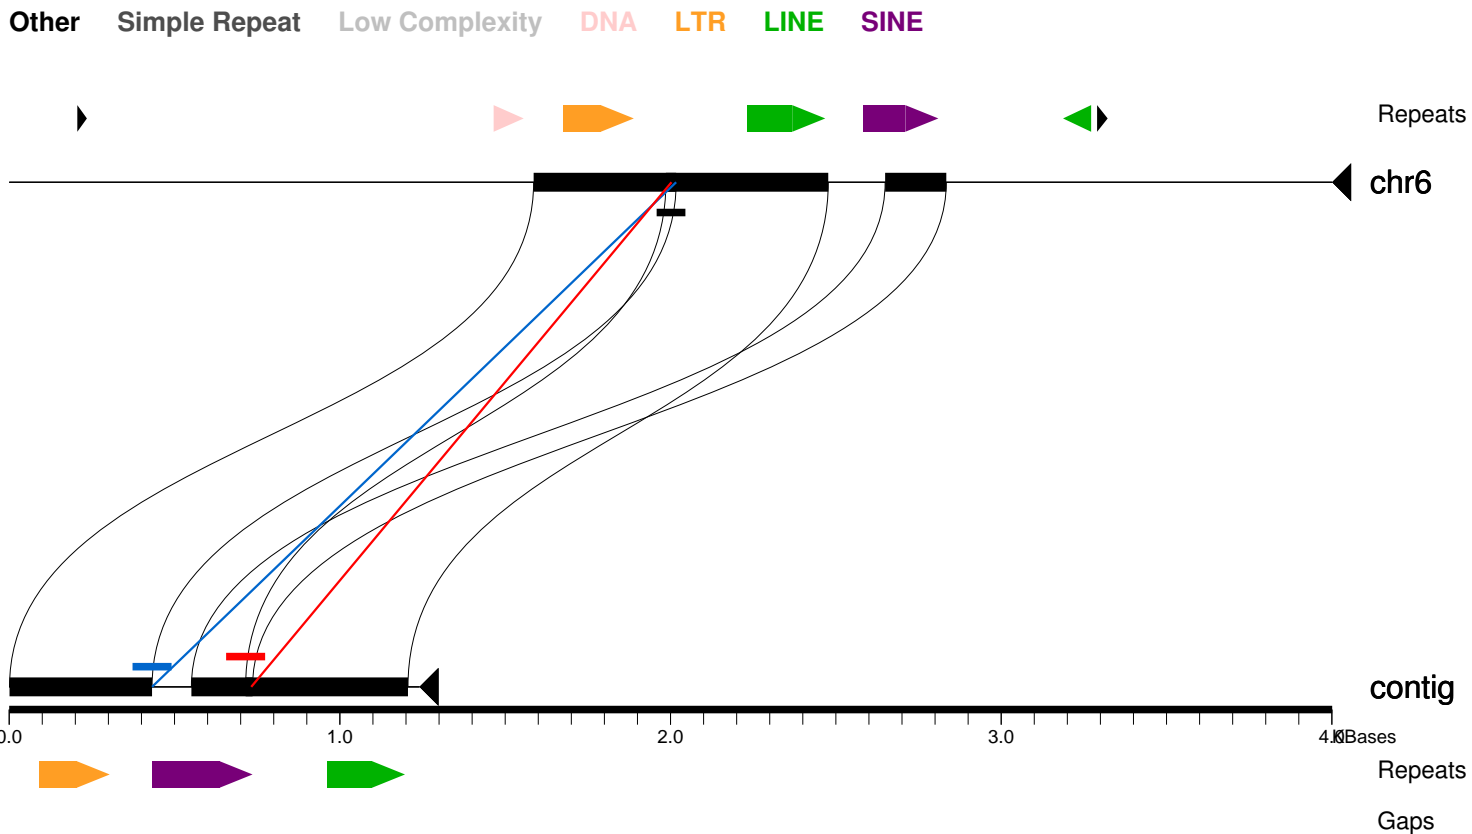

siteID: chr6\_82297440 Scaffitg2 - Breakpoint: chr6:82297423

chr6:82297263-82297598

Overlap Length: 16 INS size: 429 Genotyped: No

```

left      TC-----GTTCATAGTATTCTATGGGTGATA
chrom     TCATCCATGTCCCTTCAAAG-GACATGAACTCATCTTCTTTATCGTTGCATAGTATTCTATGGGTGATA
right    T-----TTAGTAGAGACGGGGTTTACCGTG--TTAGC----CAGA-----ATGGTCTCGA
          *1              22NNN221222NN2NNN222N2N2N  222N21111**1*1111111*****1*11*

```

```

left      TGTGCCATATTTTCTTAATCCAGTCTGTCATTGATGGGCATTTGGGTTGG-TTCCAAGTCTTTGCTATTG
chrom     TGTGCCATATTTTCTTAATCCAGTCTGTCATTGATGGGCATTTGGGTTGG-TTCCAAGTCTTTGCTATTG
right    TCTCC--TGACCTCGTGATCC-GCCCGCCTCGGCCTCCCAAAGTGCTGGGATTACAGGCGTGAGCCACCG
          *1*1*11*1111*1*1*****1*1*1*111*11111*1111*1*1**1**1*11*11*1*11*

```

```

left      TGAATAGTGCTGCAATAAACATGTGTGCATGTATCTTTNNNNNNNNNNN-----
chrom     TGAATAGTGCTGCAATAAACATGTGTGCATGTATCTTTATAGTAGAATGATTTATAATCCTTTGGGTATA
right    CGCC-----CGGCC-----GTGTGCATGTATCTTTATAGTAGAATGATTTATAATCCTTTGGGTATA
          1*1111111*1**1111111111*****1*222222222222222222222222222222222222

```

```

left      -----
chrom     TACCCAGTAATGGGATTGCTGGGTCAAACGATATTTCTGGTTCTAGATCCTTGAGAAAATCACCACACTGT
right    TACCCAGTAATGGGATTGCTGGGTCAAACGATATTTCTGGTTCTAGATCCTTGAGAAAATCACCACACTGT
          22222222222222222222222222222222222222222222222222222222222222222222

```

```

left      -----
chrom     CTTCCACAATGGTTGAACTAATTTACTTCCCAACAGTGTA AAAAGCGTTTCTATCGCT
right    CTTCCACAATGGTTGAACTAATTTACTTCCCAACAGTGTA--
          2222222222222222222222222222222222222222222222222222222

```

Other Simple Repeat Low Complexity DNA LTR LINE SINE

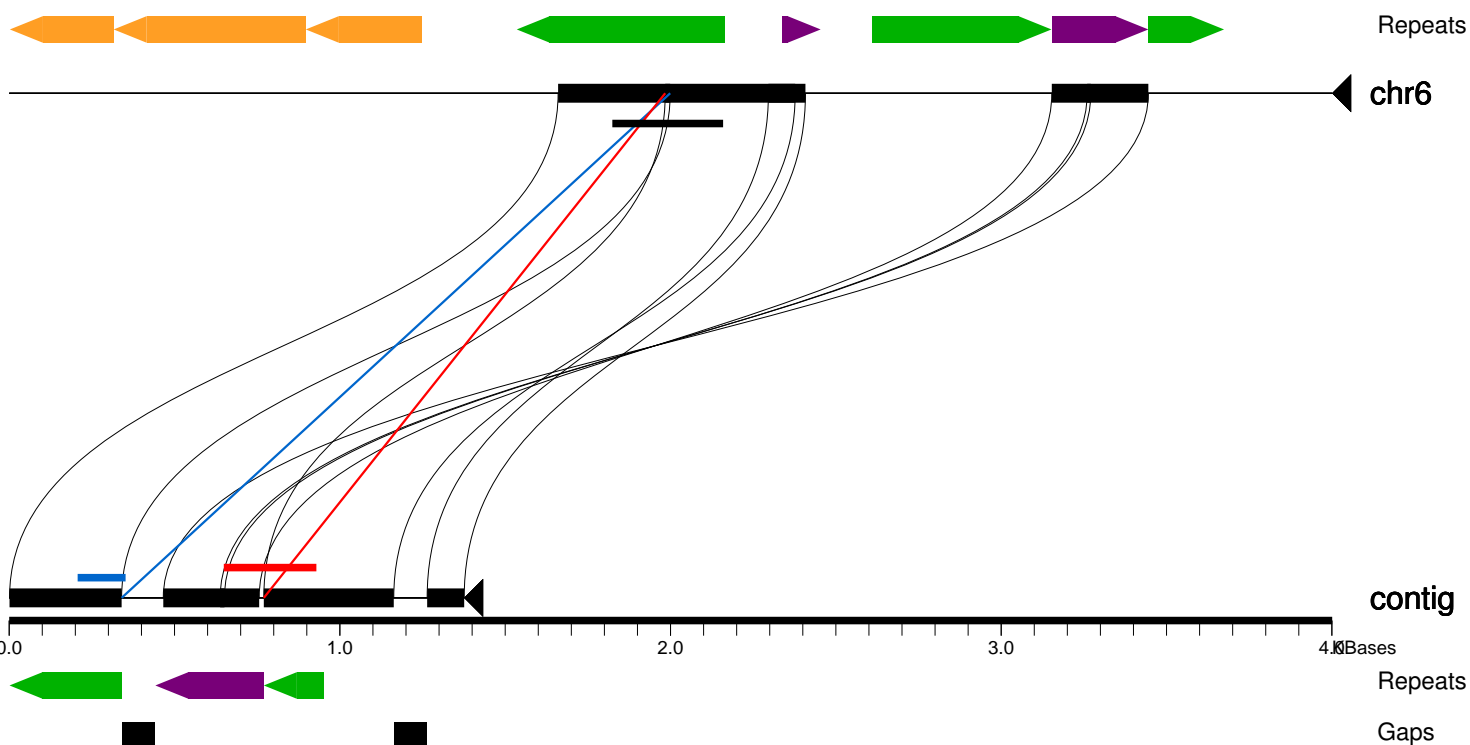



siteID: chr6\_88698059 Scaffitg2 + Breakpoint: chr6:88698068

chr6:88698018-88698124

Overlap Length: 10 INS size: 296 Genotyped: Yes

```
left AAATG-GTGC----TGGGAT---AACTGGCTAGC--CATATGCAGAAG--ATTGAAACTGGGCCCCCTTTC
chrom AAATG-GTGC----TGGGAT---AACTGGCTAGC--CATATGCAGAAG--ATTGAAACTGGGCCCCCTTTC
right TGATCCGTCCGCCTCGGCCTCCCAAAGTGCTGGGATTACAGGCGTGAGCCACCGCGCCCGGCCCCCTTTC
      11**11**1*111111**11*111**111***1*1111*1*1**111**11*11*111*1**1*****
```

```
left TTTTTTTTTTTTTTTTTTTTGGAGACGGAGTCTCGCTCTGTCGCCAGGCTGGAGTGCAGTGGC
chrom TTTAAACTATATA----CAAAAATTAAGTCAAGATTGATTA--AAGGCTTAAATAT-----
right TTTAAACTATATA----CAAAAATTAAGTCAAGATTGATTA--AAGGCTTAAATAT-----
      **2222*2*2*22222222*2*222*2**22*2*222*22222*****22*2*22222222
```

Other Simple Repeat Low Complexity DNA LTR LINE SINE

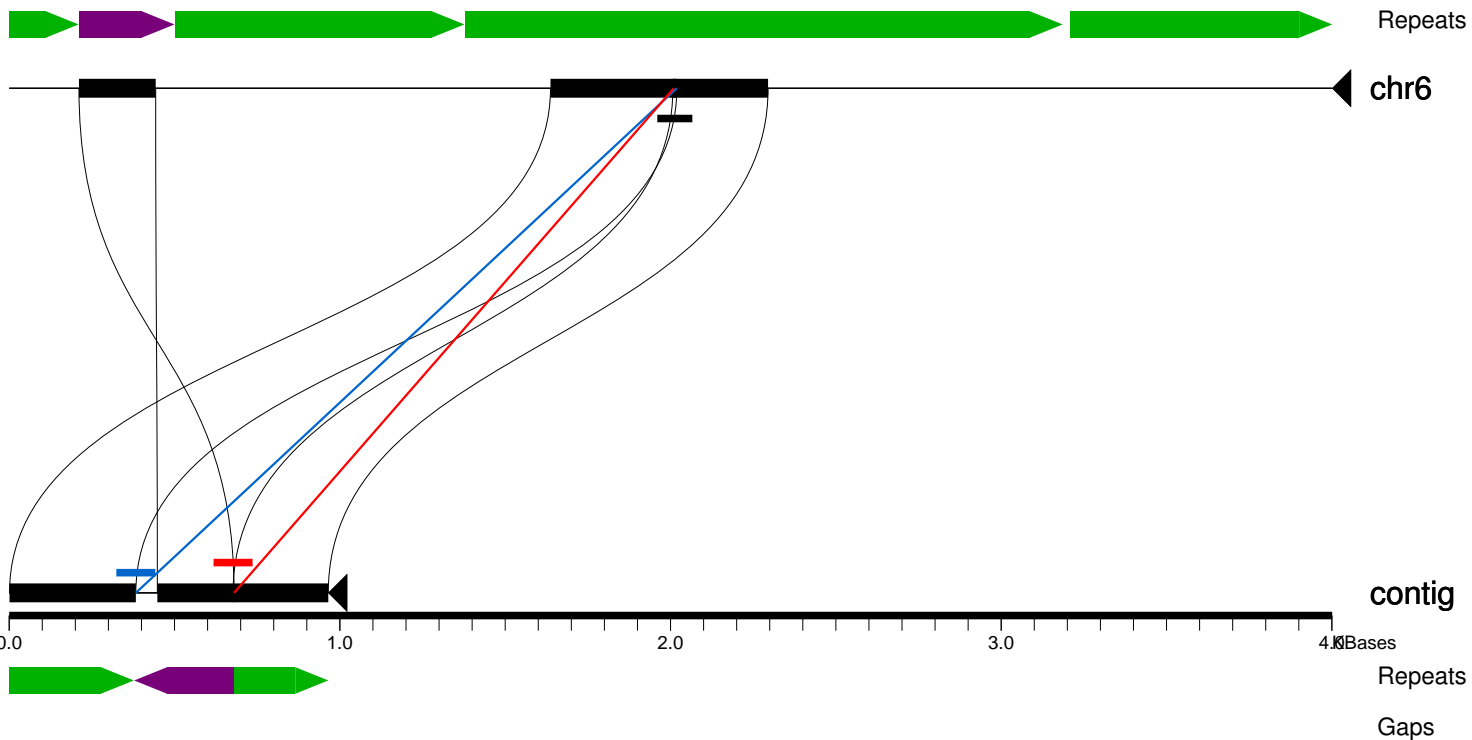



siteID: chr6\_93576141 Scaffitg1 - Breakpoint: chr6:93576135

chr6:93575975-93576308

Overlap Length: 14 INS size: 301 Genotyped: Yes

```
left -----AGTTTTCATGATATAAAATTAAGGATATGCCAGACAATAAAATTAATAATTTGATCAA
chrom GCCTCCTTTTAACCAGTTTTTCATGATATAAAATTAAGGATATGCCAGACAATAAAATTAATAATTTGATCAA
right GAGGC-----AGGAGA----ATGGCGTGAACCCGGA---GGCGGAGC-----TTG--CAG
      2NNN2      2NN**11111***111*1**1111***111*1*1**1111111111111111***11**1
```

```
left TTAATCCATACCAGATAAATTTGATTAGCCAAATGAATACTTGTGAGTTTCTGCAATATCCTAGGTTCTG
chrom TTAATCCATACCAGATAAATTTGATTAGCCAAACGAATACTTGTGAGTTTCTGCAATATCCTAGGTTCTG
right TGAGCCGAGATCCC-----GCCACTGCACTCCAGCCTGGGCGACAGAGCGAGACTCCGT-CT-
      *1*11*1*1*1*1111111111111111***11N1*1*1*1111**1*111*1*1111*11**11**1**1
```

```
left TGCATGCTAAACACCAGCATAAAAAAGACTGTATGGGCGGGCGCGGT--GGCTCACGCCTGTA-ATCCCA
chrom TGCATGCTAAACACCAGCATAAAAAGACTGTATGACACAATCCTTGTCTGACTCTTGTCTCCAAGATTCAT
right --CAAAAAAAAAAAAAAAAAAAAAA*AAAAAGACTGTATGACACAATCCTTGTCTGACTCTTGTCTCCAAGATTCAT
      11**1111***1*11*11*1*1*****1*222*222*222*22*2***22*2222*2**2*22
```

```
left GCACTTTGGGAGGCCGAGGCGGGCGGA--TCACGAG-----GTCAGGAGATTGAGACCATCCCGGCT--
chrom AAACACTGTTAGACCAGATAGATCTGTCTTCCCTATAGATCTGTCTTCCCTGTTACACCAGCTGGATTTG
right AAACACTGTTAGACCAGATAGATCTGTCTTCCCTATAGATCTGTCTTCCCTGTTACACCAGCTGGATTTG
      22**22**22**2**22222*22*2*222**2*2*222222***2222222*2*2***2*22*22*22
```

```
left -AAAACG-----GTGAAACCCCGTCT-----CTACTAAA-----
chrom GACAACATGAGTTGCTGTGAGACCTAGACTTAGAGTAGAGGCCTAAGGAAGAAT
right GACAACATGAGTTGCTGTGAGACCTAGACTTAGAGTAGAGGCCTA-----
      2*2***2222222222***2***22*2**22222222222***NNN11
```

Other Simple Repeat Low Complexity DNA LTR LINE SINE

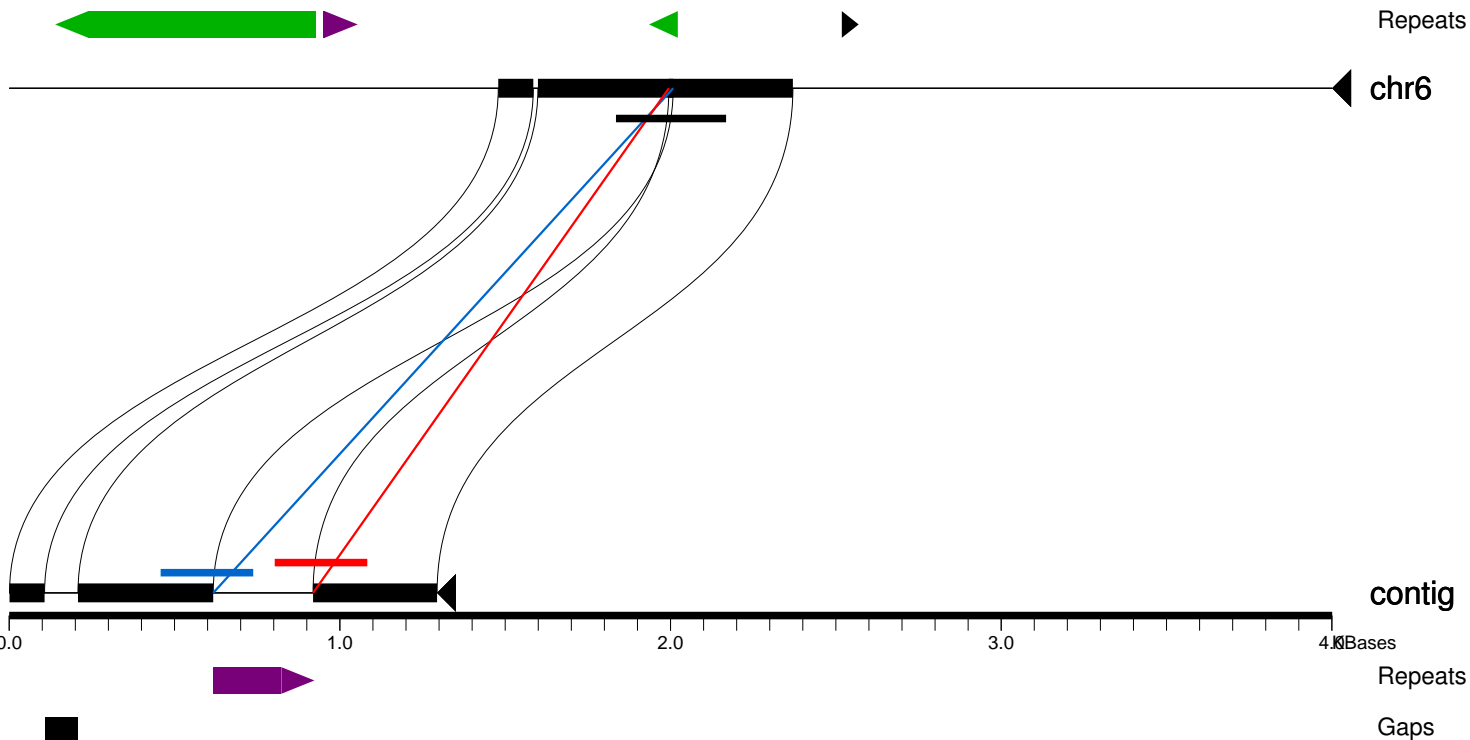





siteID: chr6\_95368336 Scafftig4 + Breakpoint: chr6:95368360

chr6:95368314-95368419

Overlap Length: 14 INS size: 317 Genotyped: Yes

```
left  TCA--TGGTTTTACTTTTCAGATAATCTT---TTAAATTCCTG-GCTACTTTT-----TTCATTCACTA
chrom TCA--TGGTTTTACTTTTCAGATAATCTT---TTAAATTCCTG-GCTACTTTT-----TTCATTCACTA
right CCACCCGCCTCGGCCTCCCAAAGTGCTGGGATTACAGGCGTGAGCCACCGCGCCCGGCC**TTCATTCACTA
      1**111*11*111*1*1*11*1111**1111***1*11*1**1**1**11111111111*****
```

```
left  TCTTTTTTTTTTTTTTTTTTTTTTTTTTTTTTTTTTTGGGACGGAGTCTCGCTCTGTGCGCCAGGCC-
chrom TCTAGTGAACCTTAATATATAGGTT-----GATTC AATTTCTTTCCATTATTTTTT
right TCTAGTGAACCTTAATATATAGGTT-----GATTC AATTTCTTTCCATTATTTTTT
      **22*2222**22*2*2*222**222222222222222**2**2222***2**2222*22222
```

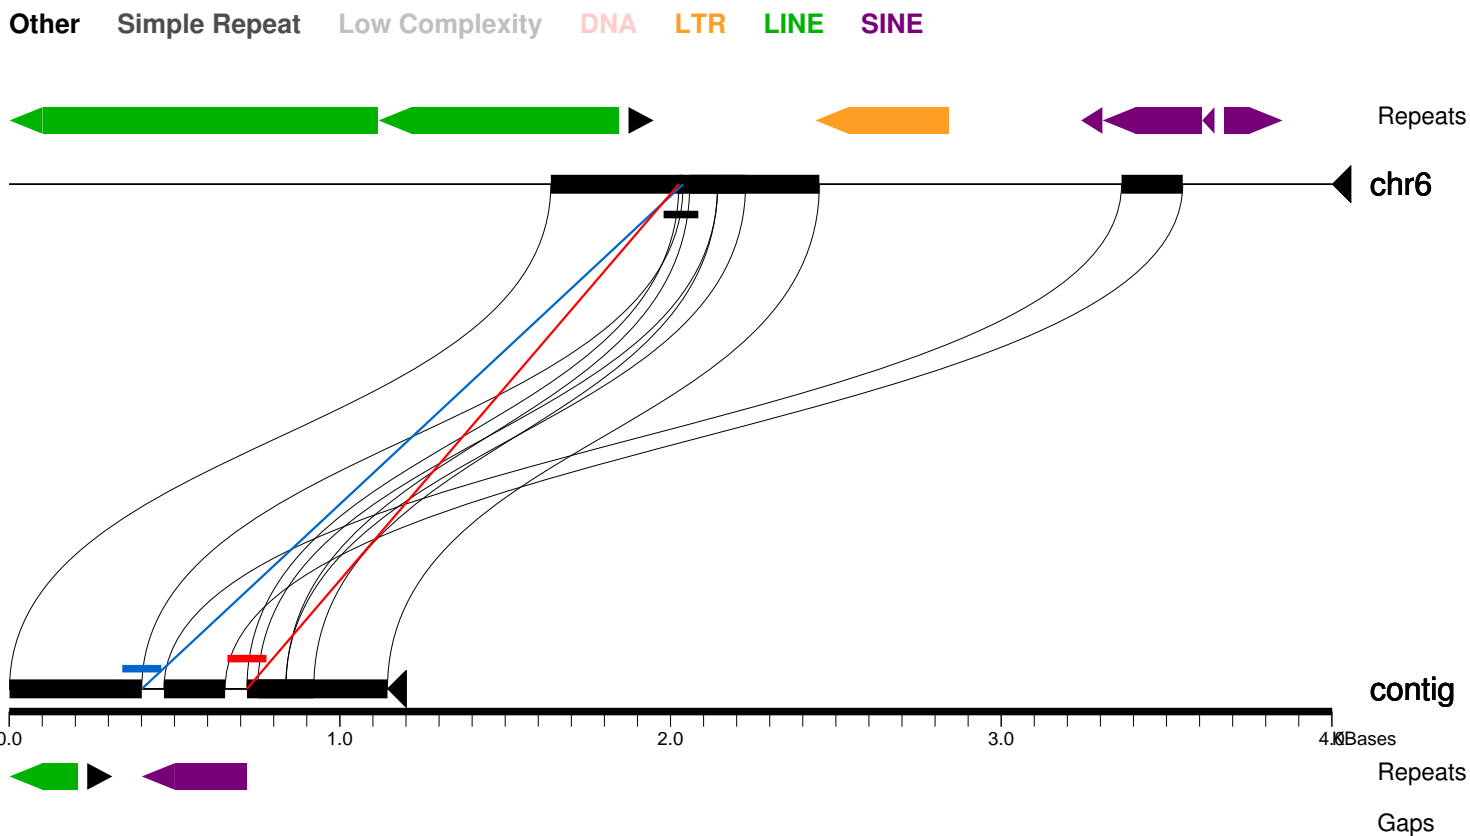







siteID: chr6\_9702239 Scaffoldig2 - Breakpoint: chr6:9702239

chr6:9702079-9702410

Overlap Length: 12 INS size: 310 Genotyped: Yes

```

left  -----GGAGATCTCAGAGGACCA--TAGGGACAGCTGTTTCATCCTCCCCAAATGTCTTCACAT
chrom ACATCCTTCTAAGGAGATCTCAGAGGACCA--TAGGGACAGCTGTTTCATCCTCCCCAAATGTCTTCACAT
right -----GAGAATGGCGTGAACCCGGGAGGCGGAGCT-TGCAGTGAGCCGAGATCCCGCCAC-T
          1****11111*1*1***1111***111****1*1**11111**1*1**11*11***1*

```

```

left  GTGATGTGGCTGTAGGCCAGCCCCAGCACCCCTGTCTACTCAATATGCACATCAGGCATCTGGGAGAAAT
chrom GTGATGTGGCTGTAGGCCAGCCCCAGCACCCCTGTCTACTCAATATGCACATCAGGCATCTGGGAGAAAT
right GCACTCCAGCCTGGGCGACAGAGCGAG-ACTCCGTCT---CAAAAAAAAAAAAAA-----AAAAAA
          *111*111**1111*111***11*1**1*1***111***1*111*1*11*11111111111*1***1

```

```

left  TGCAAGGTGGTCCACTCAGAATGCAGACAGCATTTGG-----CCGG-----CGCGGTGGC
chrom TGCAAGGTGGTCCACTCAGAATGCAGACAGCATTTCTCTCTACATCTCCTGCTCATCAATCCTCGATGCC
right AAAAA-----AAAAAGCAGACAGCATTTCTCTCTACATCTCCTGCTCATCAATCCTCGATGCC
          111**1111111111111*1**1*****222222222222*2*222222222*2**2**2*

```

```

left  TCACGCCTGTAATC--CCAGCACTTTGGGAGGCCGAGGCGG-GCGGATCACGAGGT--CAGGAGATC---
chrom ACAGTCACCTTATTATCCTGGAGAATGAGAGGTAGGAACGTAGATGTTATCCAGCTGGCTGCAGCTCAGT
right ACAGTCACCTTATTATCCTGGAGAATGAGAGGTAGGAACGTAGATGTTATCCAGCTGGCTGCAGCTCAGT
          2**22*222*2**222**2*2*222**2***22*222**22*22*2*22*2**2*22*2*2**2**222

```

```

left  ----GAGAC-CATCCCG--CTAAA----ATGGTGAAACCCCGTCTCTACTAAA
chrom TCACTGAGAATCAGCAGGGTGCTAATCGGCAGGGTGAAAAAAAA--TTAGAGATGG
right TCACTGAGAATCAGCAGGGTGCTAATCGGCAGGGTGAAAAAAAA-----
          22222****22**2*22**22****22222*2*****222N21N1NN1NNNNN

```

Other Simple Repeat Low Complexity DNA LTR LINE SINE

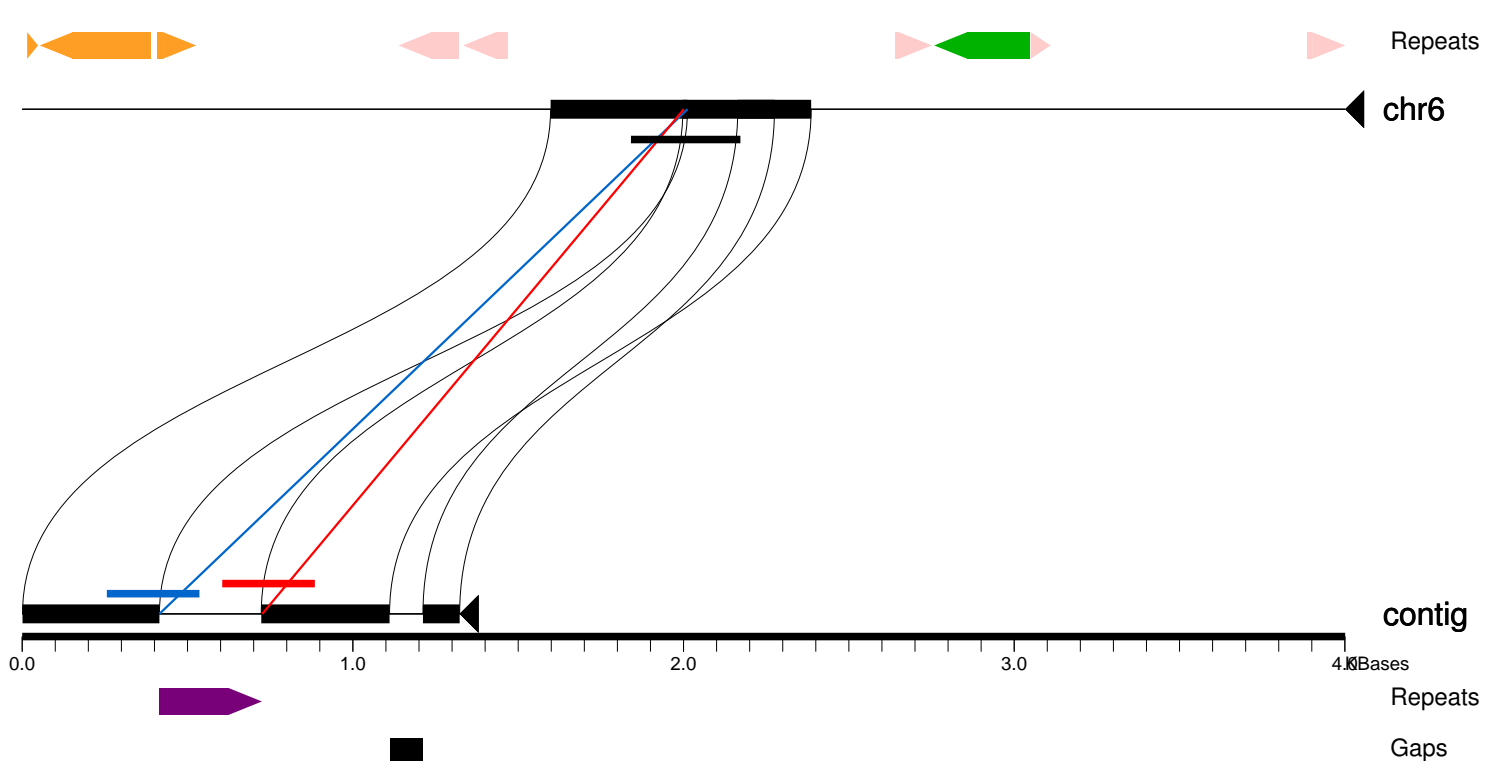

siteID: chr6\_98251348 Scaffold1 - Breakpoint: chr6:98251329

chr6:98251281-98251388

Overlap Length: 12 INS size: 295 Genotyped: Yes

```
left      T-----TTCGTTATCAGTCAGAGT--GATGACATTATTACATGTTTTACGGGCTC---TAGACCATTTC
chrom     T-----TTCGTTATCAGTCAGAGT--GATGACATTATTACATGTTTTACGGGCTC---TAGACCATTTC
right    TCCTGACCTCGTGATCCGCCCGCCTCGGCCTCCCAAAGTGCTGGGATTACAGGCGTGAGTAGACCATTTC
          *11111111****1***1*1*1*11*11*1111*111*1*1*11*11****1***111111*****
```

```
left      TTTTTTTTTTTTTTTTTTTTTTTTTTTTTTTTTTTGAGACGGAGTCTCGCTCTGTCGCCCAGGCT
chrom     TCTGTACATCTGTGAGACAATGAAGGT---GAAAGGGAAAATGACATTTTGTAG-----
right    TCTGTACATCTGTGAGACAATGAAGGT---GAAAGGGAAAATGACATTTTGTAG-----
          *2*2*222*2*2*2222222*22222*222**2*2***222*22*22*2*2*22222222
```

Other Simple Repeat Low Complexity DNA LTR LINE SINE

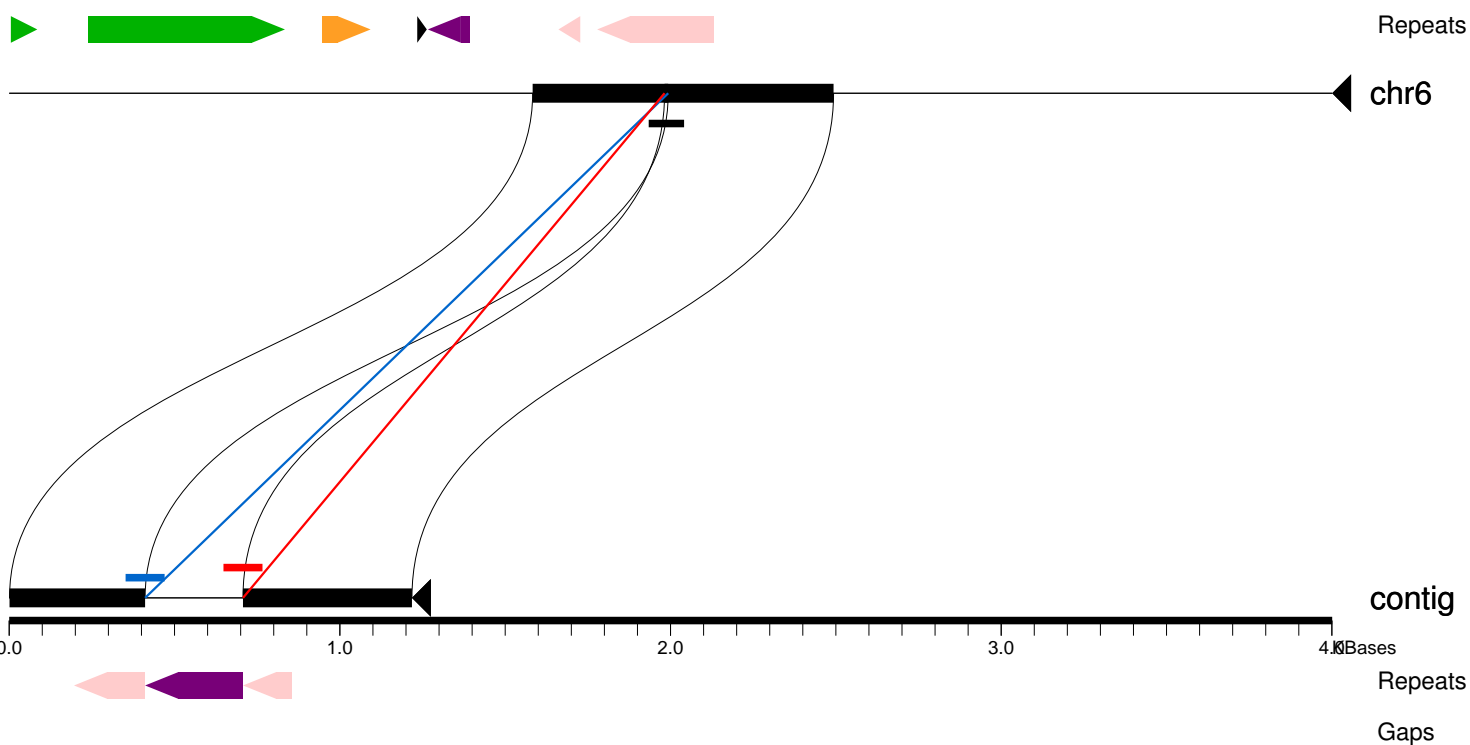

**siteID: chr6\_98320406 Scaffoldig2 + Breakpoint: chr6:98320284**  
**chr6:98320232-98320343**  
**Overlap Length: 8 INS size: 315 Genotyped: No**

```

left  GGGTGGATAACTTAGA-----AATGTG-TGACCTTAGATACTT--ACCTTCTCTAAGCCTCAGATTGTNN
chrom GGGTGGATAACTTAGA-----AATGTG-TGACCTTAGATACTT--ACCTTCTCTAAGCCTCAGATTGTGT
right TCC-GCCACCTCGGCCTCCCAAAGTGTCTGGGATTACAGGCGTGAGCCACCGCGCCCGGCAGATTGTGT
      1111*111*1**11*111111**1***1**111***1*11*1*111**11*1*1111111*****22

left  NNNNNNNNNNNNNNNNNNNNNNNNNNNNNNNNNNNNNNNNNNNNNNNNNNNNNNNNNNNNNNNNNNNNN
chrom TTTCTTAATGGGCGATAATAATGGAACCAATCTCAGAGGGTAATTTTGTG-----
right TTTCTTAATGGGCGATAATAATGGAACCAATCTCAGAGGGTAATTTTGTG-----
      222222222222222222222222222222222222222222222222222222222222222222
  
```

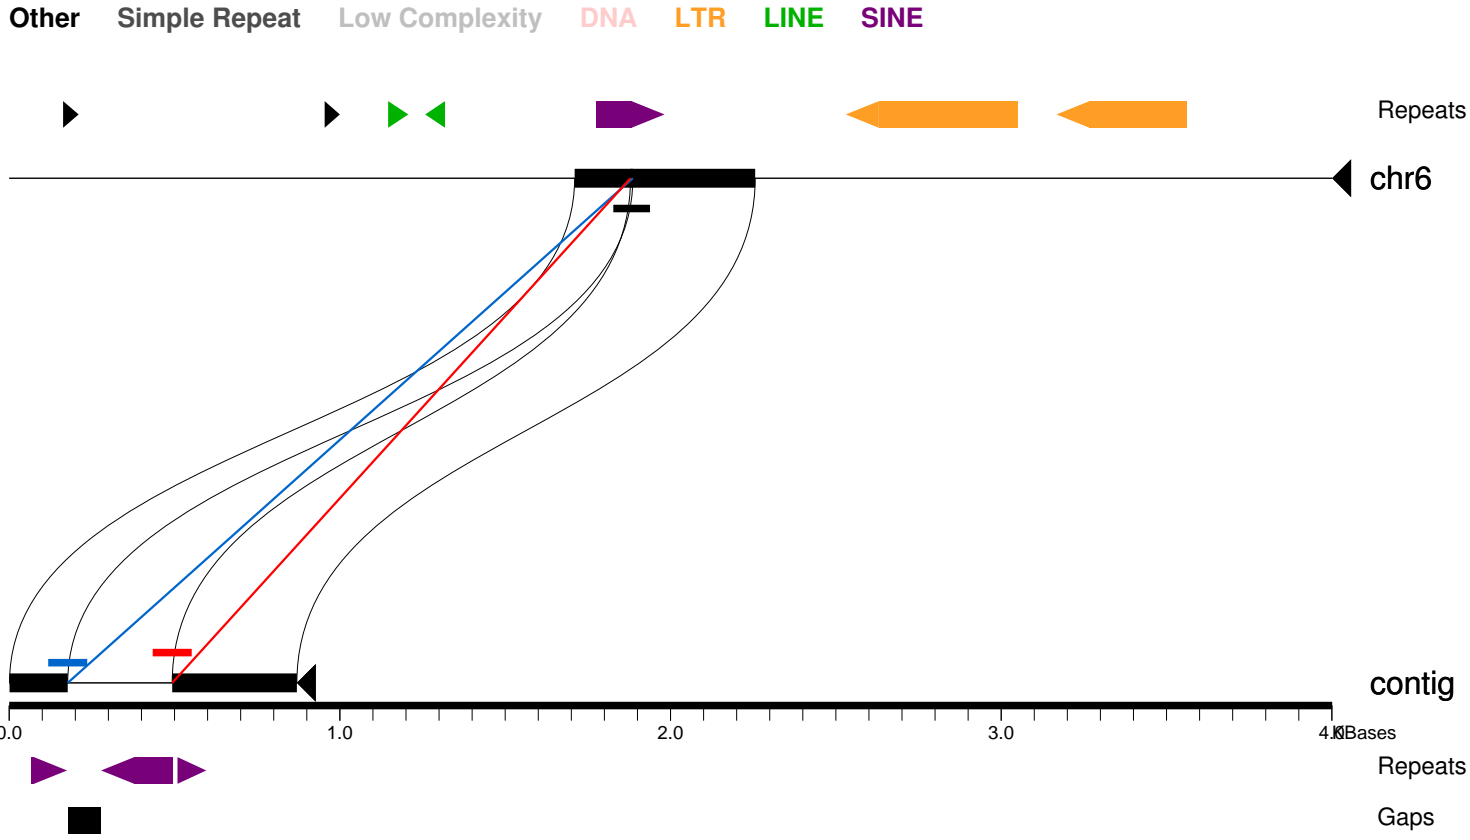





siteID: chr7\_104052599 Scafftig1 - Breakpoint: chr7:104052601

chr7:104052558-104052660

Overlap Length: 17 INS size: 296 Genotyped: Yes

```
left   -----ATAAGATCTTCCTT-----TAGTATTAA---CAAGAGCTAT-GATTTGGAAAAGTATTTAGTAT
chrom  -----ATAAGATCTTCCTT-----TAGTATTAA---CAAGAGCTAT-GATTTGGAAAAGTATTTAGTAT
right  CCGCCCGCCTCGGCCTCCCAAAGTGCTGGGATTACAGGCGTGAGCCACCGCGCCCGGCCGTATTTAGTAT
      111111111111*11**1**11111111*1*1****1111*11****1*11*111111*111*****
```

```
left   ACTTTTFFFFFFFFFFFFFFFFGAGACGGAGTCTCGCTCTGTCGCCCAGGCTGGAGTGCAGTGGCG
chrom  ACTTTTAAAGTGCTGTATTAT-----GTC-CTTTAAGTATAACCG---TATTGTTTCAAAA---
right  ACTTTTAAAGTGCTGTATTAT-----GTC-CTTTAAGTATAACCG---TATTGTTTCAAAA---
      *****222*22*2*2**2*222222222***2*22*22**222**2222*222**2**2*2222
```

Other Simple Repeat Low Complexity DNA LTR LINE SINE

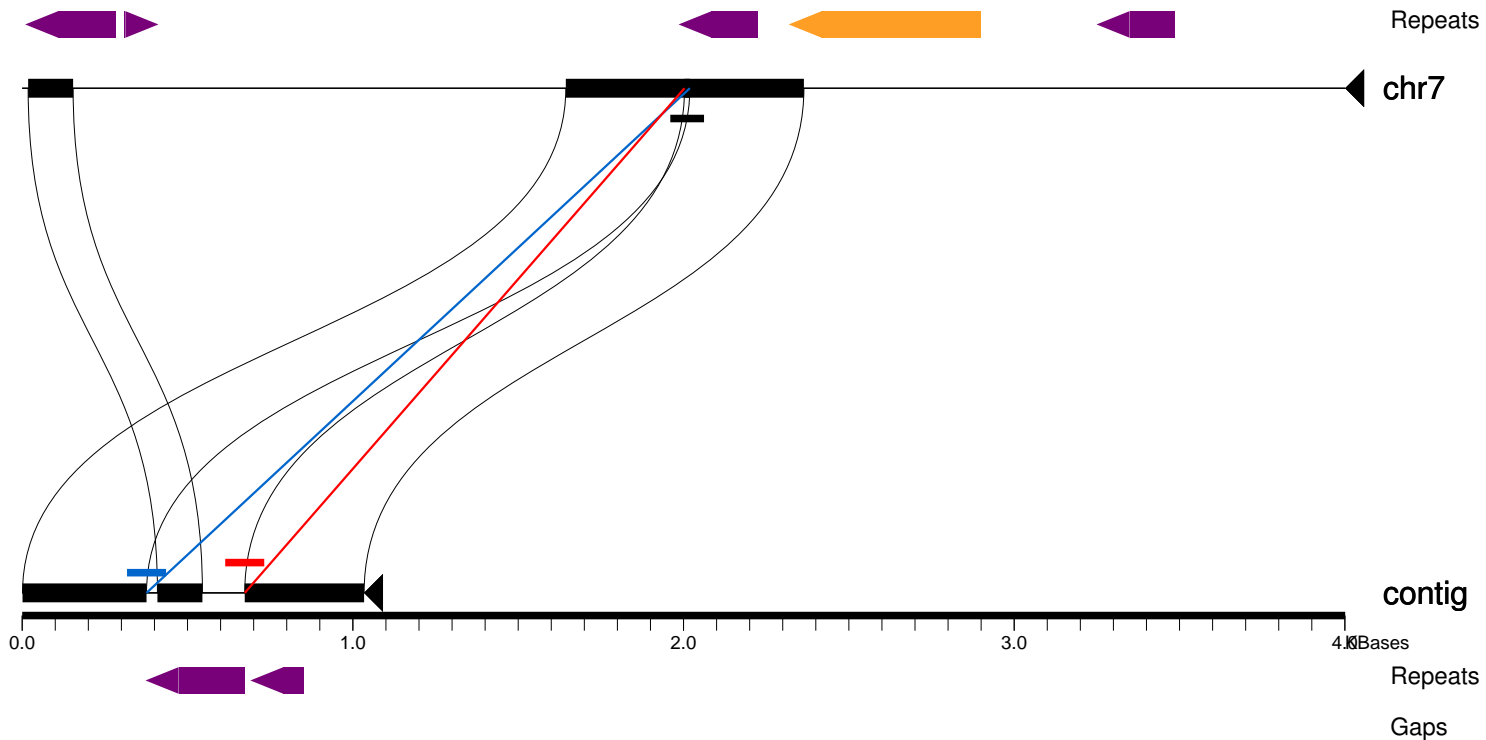



siteID: chr7\_105564470 Scaffitg5 - Breakpoint: chr7:105564456

chr7:105564413-105564515

Overlap Length: 10 INS size: 305 Genotyped: Yes

```
left  -TAGAATAAGGTTGGCA-AGA---ACTGGGTG-----AGCAGGGATAGGAATTAAGACTGAGGG
chrom -TAGAATAAGGTTGGCA-AGA---ACTGGGTG-----AGCAGGGATAGGAATTAGACTGAGCA
right CTCCAGCCTGGGCGACAGAGCGAGACTCCGTCTCAAAAAAAAAAAAAAAAAAAAAAAAAAAAGACTGAGGA
      1*11*1111*11*1*1*1*1111***11*111111111111*11*111*1*11**11******2
```

  

```
left  CCGGGCGC--GGTGGCTCACGCCTGTAATCCAGCACTTTGGGAGGCCGAGGCGGGCGGATCACGAG
chrom CTGGGCTGAGGGTAGGTCAGGGGT-----TCTGGCAG--CAACACAGCTGGA--ATGA-
right CTGGGCTGAGGGTAGGTCAGGGGT-----TCTGGCAG--CAACACAGCTGGA--ATGA-
      *2***2222***2*2***2*22*22222222222222*2***2**22*2*22*2*22***22*2**2
```

Other   Simple Repeat   Low Complexity   DNA   LTR   LINE   SINE

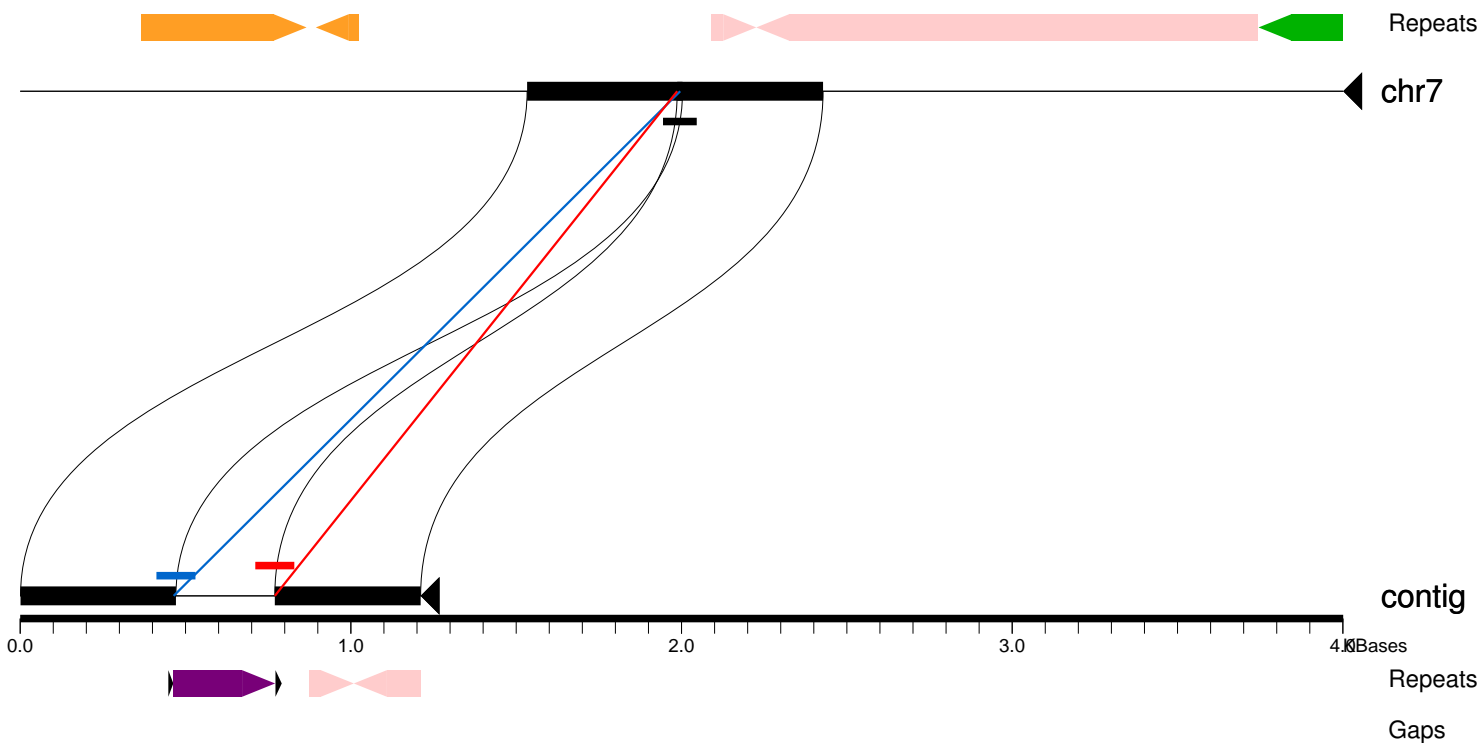



siteID: chr7\_108392032 Scaffitig1 + Breakpoint: chr7:108392005

chr7:108391961-108392064

Overlap Length: 16 INS size: 265 Genotyped: Yes

```

left      TAGTAACTAAAAAGTAAA----GTTTCTTAGGGTAA---AAGATAGGTTAG-----CAAGAGGGAC
chrom     TAGTAACTAAAAAGTAAA----GTTTCTTAGGGTAA---AAGATAGGTTAG-----CAAGAGGGAC
right    T-GTATTTTTAGTAGAGACGGGGTTTTACCTTGTAGCCAGGATGGTCTCGATCTCCTGACCAAGAGGGAC
          *1***11*11*1111*1*1111*****11111**1*111*1***1*11*1*111111111******
left      ATTTTGTGTTTTTTGTTTTTTGTTTTTTTTTTTTTTTTTTGTTTTTTGTTTTTTGAG-ACGGAGTCTCG
chrom     ATTTTGAAGAC-----AGAATAAATGTATTC-----TGTTAATAACAGCACATCAAAAATA
right    ATTTTGAAGAC-----AGAATAAATGTATTC-----TGTTAATAACAGCACATCAAAAATA
          *****22222222222222*22*222*2*2**22222222*****22*222*2**22222222
  
```

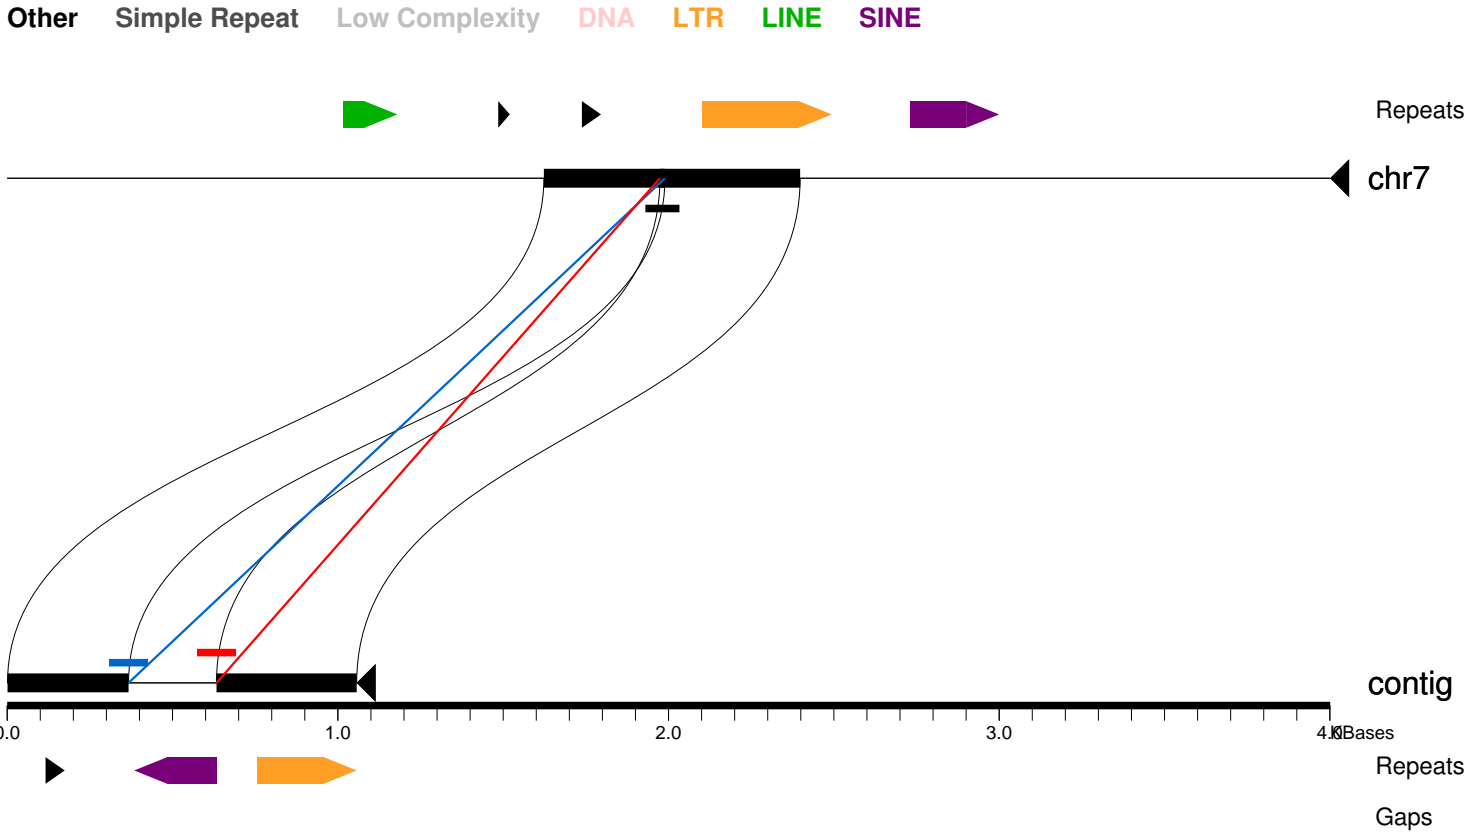

siteID: chr7\_108542970 Scafftig1 + Breakpoint: chr7:108542975

chr7:108542929-108543034

Overlap Length: 14 INS size: 419 Genotyped: No

```
left  GGATCAT--TCAGGCTAC--AAGGTCTACC-TTATGGAAG---GATATAGAAGT-----CAGGCTTCCTT
chrom GGATCAT--TCAGGCTAC--AAGGTCTACC-TTATGGAAG---GATATAGAAGT-----CAGGCTTCCTT
right CCACCCGCCTCGGCCTCCCAAAGTGCTGGGATTACAGGCGTGAGCCACCGCGCCCGGCC CAGGCTTCCTT
      11*1*11111*1*1*1*11***11**1111***11*11*111*11*11*1111111111*****
```

```
left  TTTNNNNNNNNNNNNNNNNNNNNNNNNNNNNNNNNNNNNNNNNNNNNNNNNNNNNNNNNNNNNNNNNNN
chrom TTT-----ATAGAACCATCATCTTCATCTTCATCTCGATTACTTTCTTTTTCTA
right TTT-----ATAGAACCATCATCTTCATCTTCATCTCGATTACTTTCTTTTTCTA
      ***22222222222222222222222222222222N22222222222222222222222222222222
```

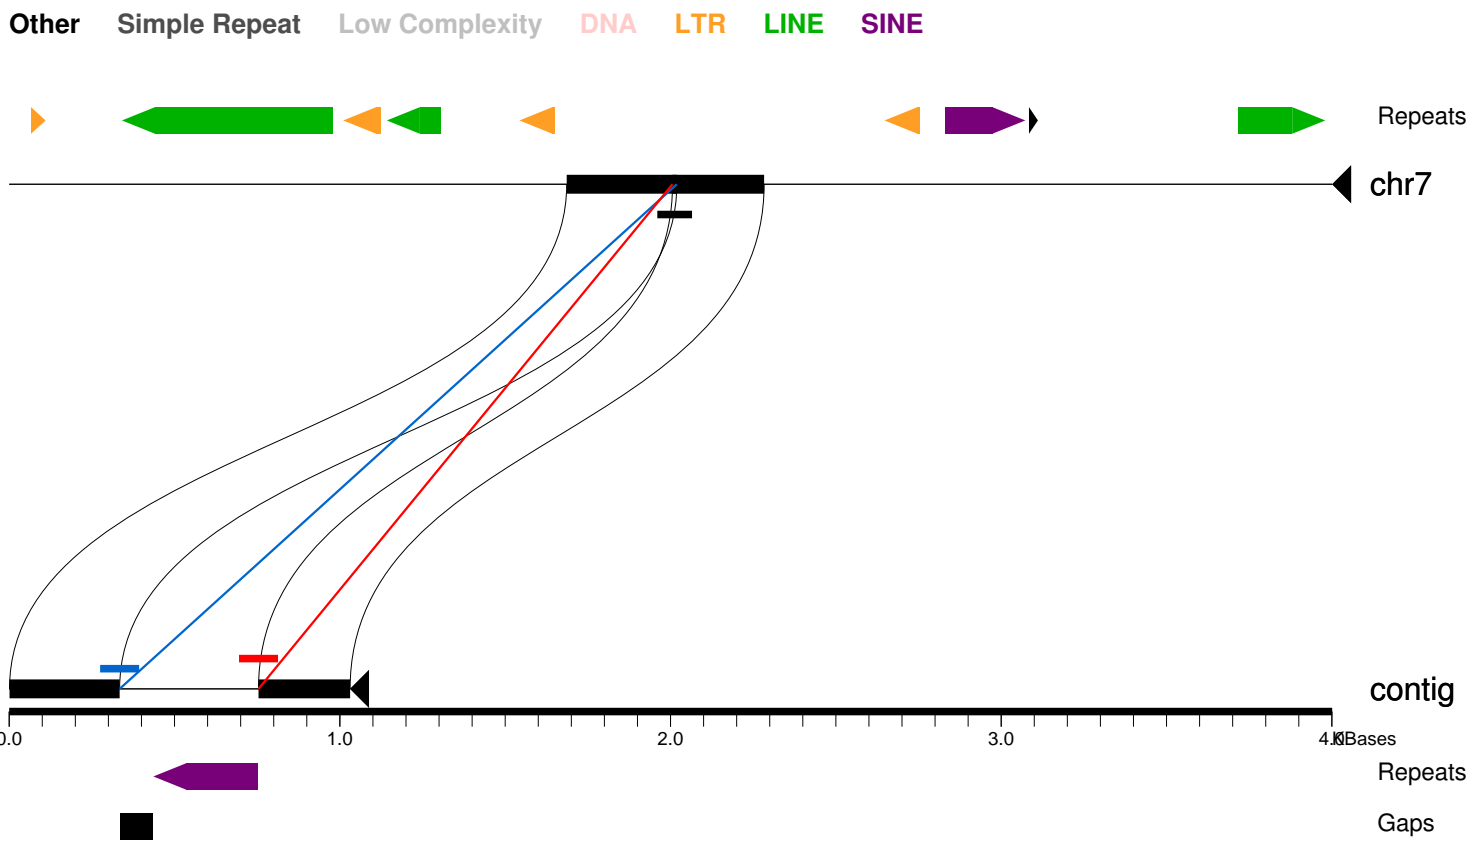







siteID: chr7\_117356236 Scaffitig1 + Breakpoint: chr7:117356239  
 chr7:117356192-117356299  
 Overlap Length: 13 INS size: 306 Genotyped: Yes

```

left  TTTTTTTTCTTTGTATAAGAGCCCAGATAGTATA-----AAAGGACTCGCTTTAAAAAATAACT-
chrom TTTTTTTTCTTTGTATAAGAGCCCAGATAGTATA-----AAAGGACTCGCTTTAAAAAATAATCT-
right CCGCCT-CGGCCTCCCAAAGTGCTGGGATTACAGGCGTGAGCCACCGCGCCCGGCC TAAAAAATAACTT
      111111*1*1111*111*1**11*1*11*1**1*1111111111*11*11*1**111*****N**1

left  -TTTTTTTTTTTTTTTTTTTTGAGACGGAGTCTCGCTCTGTCGCCAGGCCGGACTGCGGAC
chrom -TAAACAA-----AGCTGCCCAGAACTTTGACTTTTCAGTACTA---CTTTTTTTTTTGT
right TTAAACAA-----AGCTGCCCAGAACTTTGACTTTTCAGTACTA---CTTTTTTTTTTGT
      1*222222222222222222**2222*2*2*2*22**2*22222*2*222*2222*22222
  
```

Other Simple Repeat Low Complexity DNA LTR LINE SINE

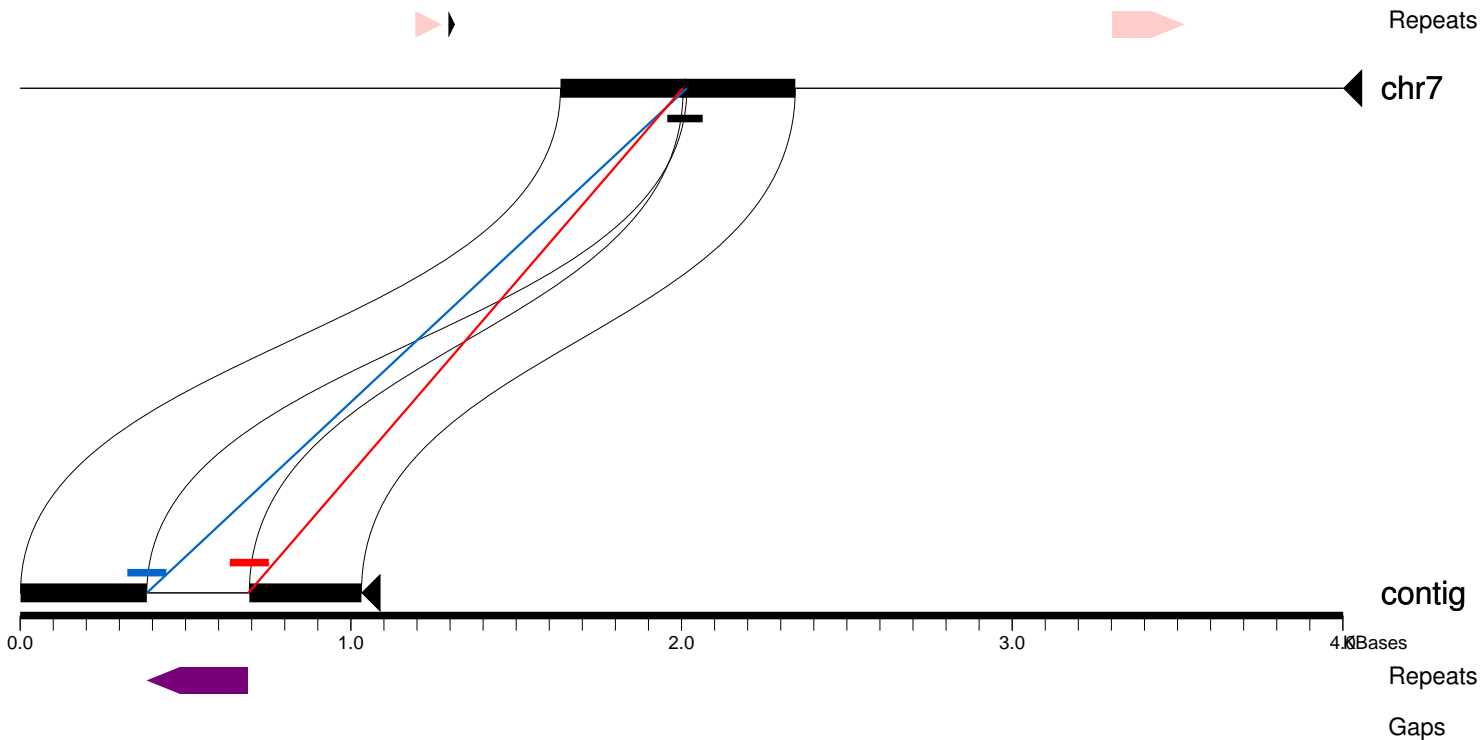

siteID: chr7\_118083316 Scafftig6 - Breakpoint: chr7:118083302

chr7:118083255-118083361

Overlap Length: 13 INS size: 296 Genotyped: Yes

```
left TT-CCTCTATAAATTTTATTTT----TAAAGTAAATTCCTTTT-----ATGTGAGCTTAAAAATAATTC
chrom TT-CCTCTATAAATTTTATTTT----TAAAGTAAATTCCTTTT-----ATGTGAGCTTAAAAATAATTC
right GCGCCACTGCACTCCAGCCTGGGCGACAGCGAGACTCCGTCTCAAAAAAAAAAAAAAAAAAAAAAATAATTC
      111**1**11*1*111111*1111111*111*1*1**11*1*1111111*1111*1111*****
```

```
left CTGGCCGGGCGCGGTGGCTCACGCCTGTA----ATCCCAGCACTTTGGGAGGCCGAGGCGGGCGG
chrom CTATTGTTTACCA-GGATTATGACTGAAGATTATATATAAACTTTTAAA-----
right CTTATTGTTTACCA-GGATTATGACTGAAGATTATATATAAACTTTTAAA-----
      **2222*2222*222**2*2*2*2***2*2222**222222*****222*22222222222222
```

Other Simple Repeat Low Complexity DNA LTR LINE SINE

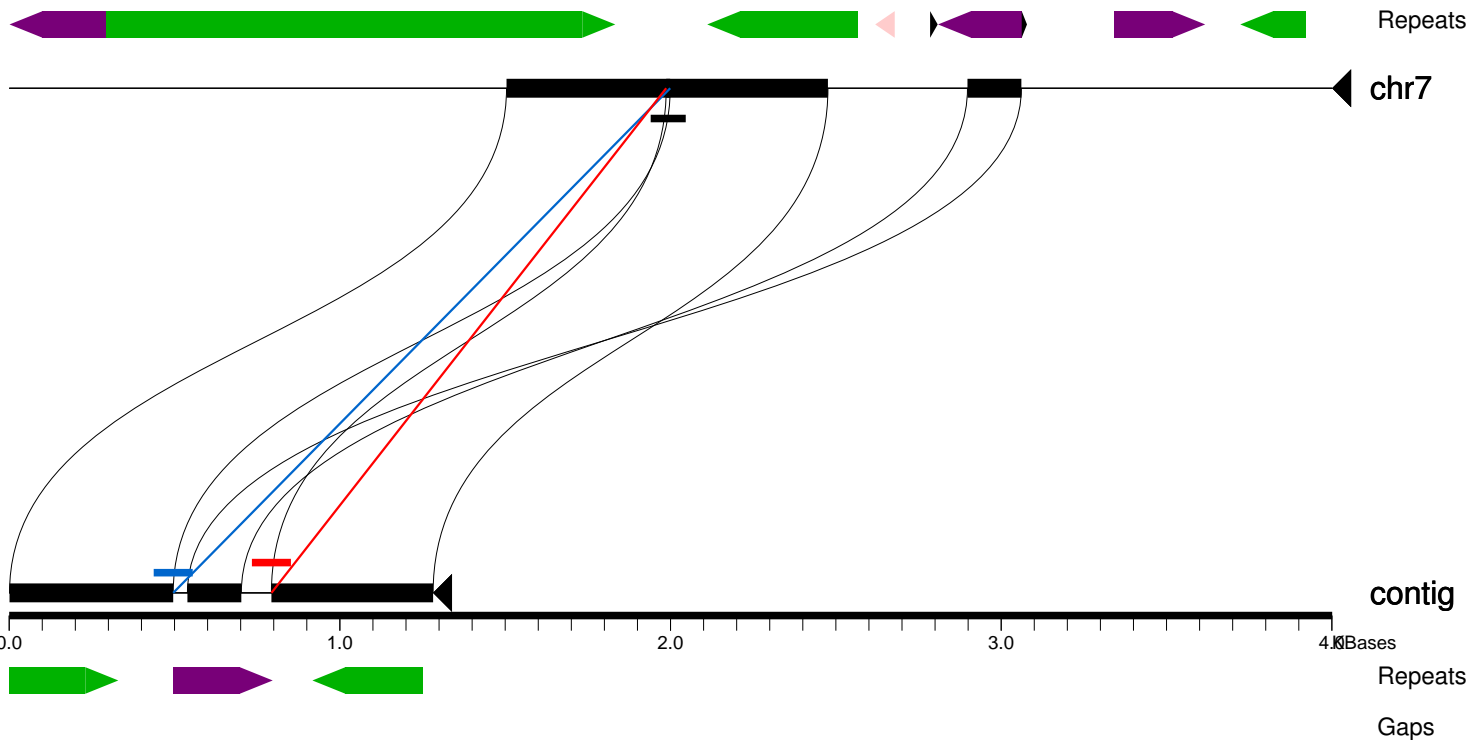

siteID: chr7\_119259827 Scafftig1 + Breakpoint: chr7:119259809  
 chr7:119259649-119259975  
 Overlap Length: 7 INS size: 304 Genotyped: Yes

```

left  -----TTTTGATGATTTCTTACAGT--CTAAACACTGTCATTGTAAGACTGTTCTGTACACAACCTTAAGT
chrom CCTCATTTTTGATGATTTCTTACAGTTCTAAACACTGTCATTGTAAGACTGTTCTGTACACAACCTTAAGT
right  TTTAGTAGAGACGGGGTTTCACCGTTTTAGCC---GGGATGGTCTCGATCTCCTG-----ACCTCGTGA
      NN2NN*111**1*111*1*1**1**21**11*111*11**1**11111*1*1***111111****111*1

left  TCCAAAATGAGGAAGGACATTTTCTAGGCTTCATACTGTGTTTGGAGAGAATGAGGTTAATATTTTCCCT
chrom TCCAAAATGAGGAAGGACATTTTCTAGGCTTCATACTGTGTTTGGAGAGAATGAGGTTAATATTTTCCCT
right  TCC-----GCCCGC-----CTCGGCTCCCAAAGTGCTGGGA-----TTA-----
      ***11111111*111*111111111**1***1**11*11***1*1***1111111111**111111111111

left  CAGCAGTGAGGATCTGC----AGTCCAGCATTTTTTTTTT-----TTTT
chrom CAGCAGTGAGGATCTGC---AGTCCAGCATCTTTAATATAGAGACTGCCAGGGGAACAGGAAGCAATGA
right  CAGGCGTGAGCCACCGCGCCCGGCCAGCAGCATCTTTAATATAGAGACTGCCAGGGGAACAGGAAGCAATGA
      ***11*****111*1**111111*1*****2***22*2*2222222222222222222222222222*22

left  TTTTTTTTTTTTGGAGACGGAGTCTCGCTCTGTGCGCCAGGCTGGA---GTGCAGTGGCGCAATCTCGGCT
chrom TGGGAATTACTTTTTCCCTTTTCCCTCTGTGAAAACTATGAGGAATATGTCTAAAAGGGTAAAAATGATTT
right  TGGGAATTACTTTTTCCCTTTTCCCTCTGTGAAAACTATGAGGAATATGTCTAAAAGGGTAAAAATGATTT
      *22222**22**2222*2222**2*2**2**2222*2*2*22*2*222**22*222*2*2**22*2222*

left  CACTGCAAGCTCCGCTCCCGGGTTCACGCCATTCTC-----CTGC-----
chrom AACTTAGAGATTGGGTAGAAGATTACATTTCTTACTCTTTTTTCTTCTCATT
right  AACTTAGAGATTGGGTAGAAGATTACATTTCTTACTCTTTTTCTT-----
      2***222*2*22*222222*22*2**222*2*2***22222*21
  
```

Other Simple Repeat Low Complexity DNA LTR LINE SINE

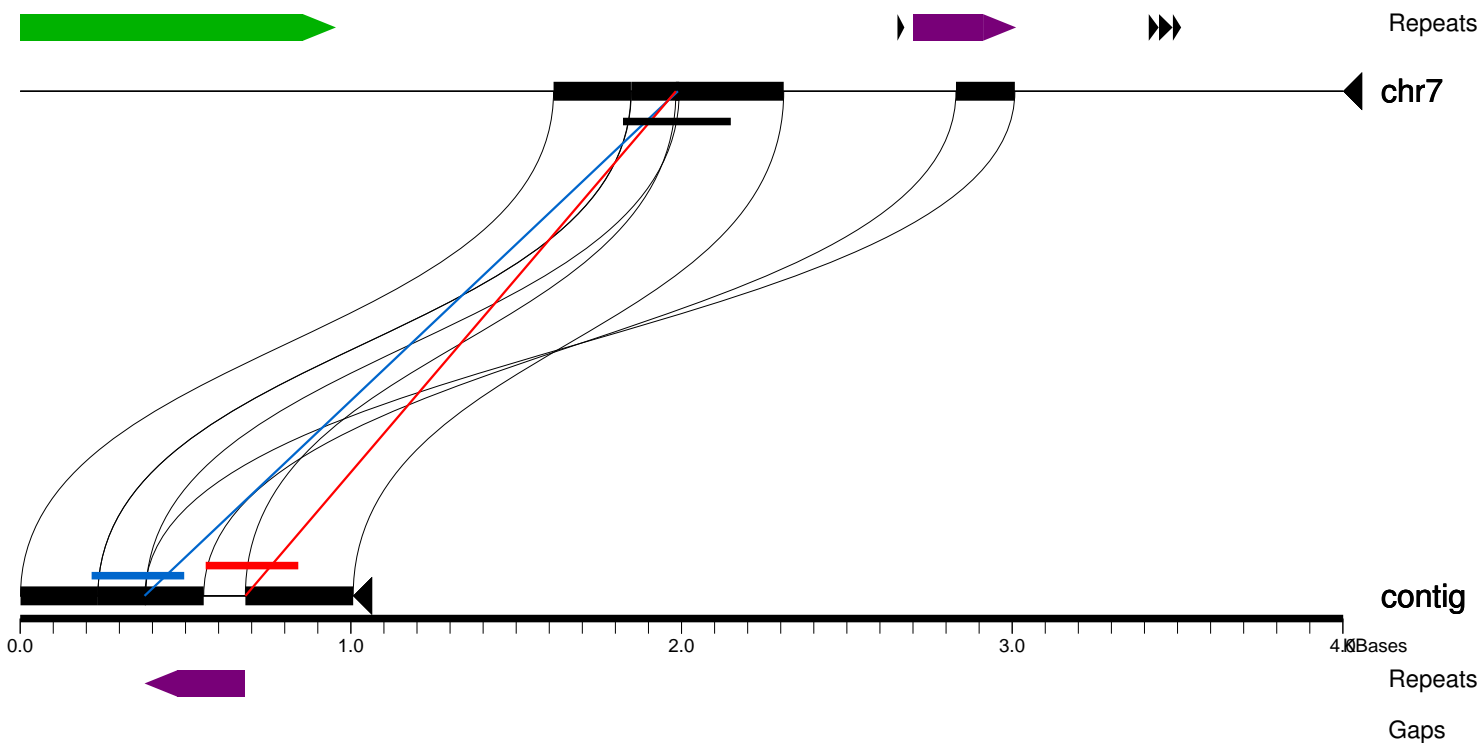







siteID: chr7\_120537974 Scaffitg1 + Breakpoint: chr7:120538075

chr7:120537915-120538246

Overlap Length: 12 INS size: 302 Genotyped: Yes

```
left AA-----AAATAAGTTCCTAAACAAAAAATGGAAAAACATTGCTATGATAATGATCCAATTAAAAAAT
chrom AATTTATTAAAAATAAGTTCCTAAACAAAAAATGGAAAAACATTGCTATGATAATGATCCAATTAAAAAAT
right --TTTAGTAGAGACAGGGTTTCACCG-----TTTTAGCC---GGGATGGTCTCGATCTCCTGACCTC---
      112222N22N*1*1*1*1*1*1*1*111111*111*11*111*11***1*111****111*1*1111111
```

```
left AGGTACTTTTCAAGATTTGTCAAAGAAAAATGCAATCATGTAAATACTAAAAAGTAAATAATTTGGGGTTT
chrom AGGTACTTTTCAAGATTTGTCAAAGGAAAAATGCAATCATGTAAATACTAAAAAGTAAATAATTTGGGGTTT
right --GTGATCCGCCCGCCTCGGCCCTCCCAAAGTGC-----TGGGATTAC-AGGCGTGAGCCACCGCGCCC--
      11**11*111*11*11*1*1*1111N***1***111111*11*1***1*111**1*111*1111*11111
```

```
left TTAAAAAATTTGGTTTTTTTTCAATAAACTTTT-----TTTTTTTTTTTTTTTTTTTTCAGACG--GAG
chrom TTAAAAAATTTGGTTTTTTTTTTCAATAAACTTTTAAACACAGACTATAAAAAATTATACTGCTACAAAGGAGGAG
right -----GGCCTT-----CAATAAACTTTTAAACACAGACTATAAAAAATTATACTGCTACAAAGGAGGAG
      11111111112*11**111111*222222222*2*2222*2*22*22*2*2*2*22**
```

```
left T-----CTCGCTCTGTGCGC----CCAGGCTGGA-----GTGCAGTGGCGGG
chrom TAAGAATTATTTTACATACTATCTGTATCCCTAAACCAGGGTCAGCTTTCCAAAACAGGTGAAATGAATGG
right TAAGAATTATTTTACATACTATCTGTATCCCTAAACCAGGGTCAGCTTTCCAAAACAGGTGAAATGAATGG
      *22222222222222222**22**2*2**2*2222*****2*222222222222222**2*2**222**
```

```
left ATCTCGGTT-CACTGCAAGCTCCGCCCTCCCGGTTTACGCCATTCTCCTGCTT
chrom CAGTGGGAGGCAGTTGGTGCACACTATCCCACCTACTTCTGACCCCTCCA-CGT
right CAGTGGGAGGCAGTTGGTGCACACTATCCCACCTACTT-----
      222*2**222*2*2222*2*2222****222*2*22NNN1NN1111N21N1
```

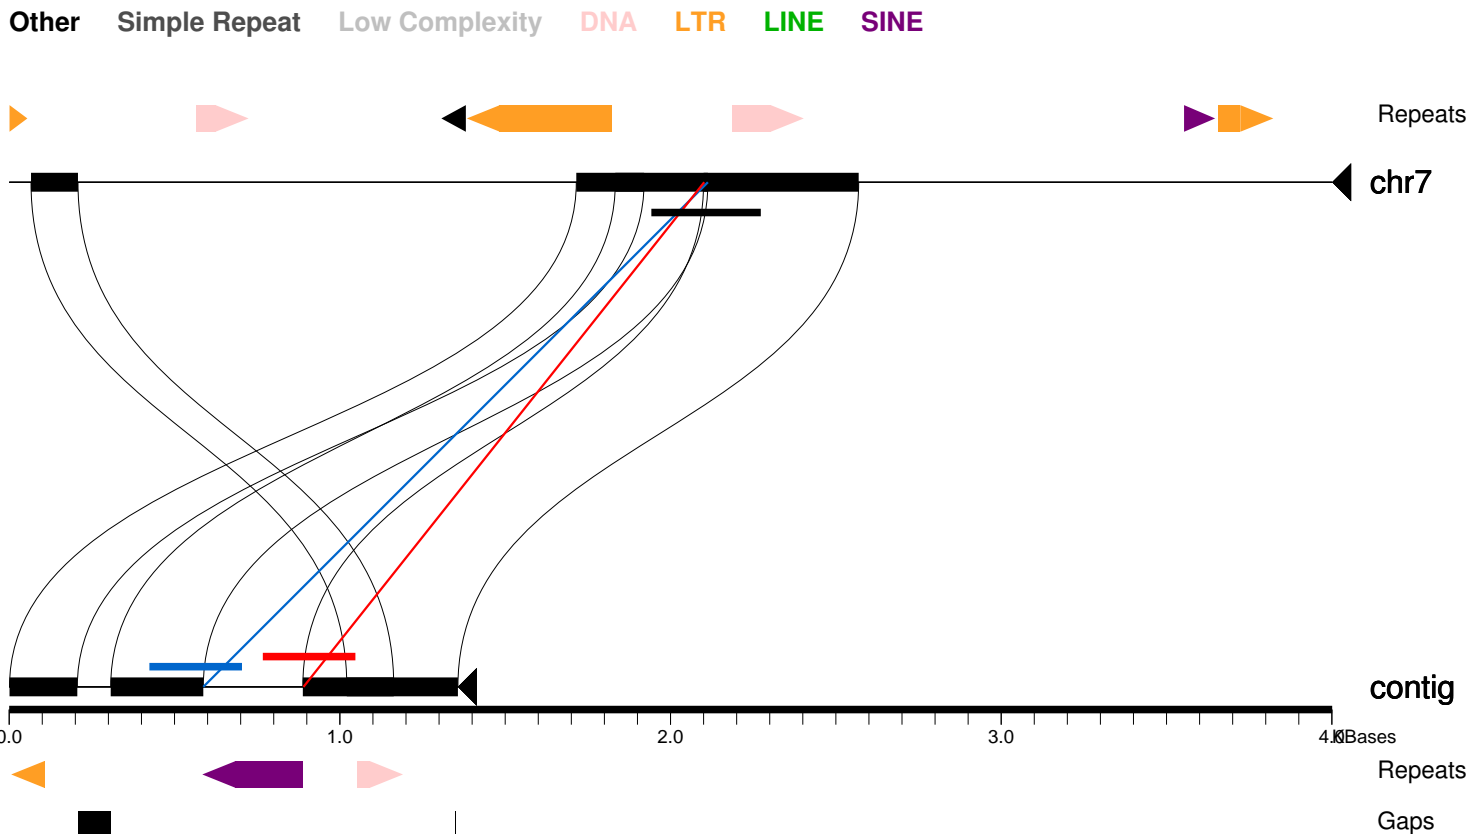



siteID: chr7\_124814720 Scafftig1 - Breakpoint: chr7:124814691

chr7:124814531-124814865

Overlap Length: 15 INS size: 387 Genotyped: No

```

left  NNNNNNNN-----AATAGTAATGGCAAACATGACTAAAACCTTAAAAATTTTGTAGACTGTAAATG
chrom ACTTCTTTCTACTCACTGAATAGTAATGGCAAACATGACTAAAACCTTAAAAATTTTGTAGACTGTAAATG
right NNNNNNNNNNNNTACA-----GCG-----TGA-----G
      NNNNNNNNNNNNNN22   111111111***11111***111111111111111111111111111111111*
  
```

```

left  CCTTACAATGAAAAATGCATGTAAAAATCCTACCTTCTCCCTTGGAAGGCATTTTATTTGGTTAAAAAAA
chrom CCTTACAATGAAAAATGCATGTAAAAATCCTACCTTCTCCCTTGGAAGGCATTTTATTTGGTTAAAAAAA
right CC-----ACC-----GCG-----
      **1111111111111111111111111111111111111***111111111111111111111111111111111
  
```

```

left  ATCCCAACTGATTATGTGCTGGGCAATGATTTTTTTTTTTTTTTTTTTGAGACGGAGTCTC-----
chrom ATCCCAACTGATTATGTGCCGGGGCAATGATTTTTTATAGATTAGCTTTA---ACAGAGTATCTGCAATAT
right --CCA-----TGGGCAATGATTTTTATAGATTAGCTTTA---ACAGAGTATCTGCAATAT
      11***11111111111111111111*****2*222*222*222*222*222*222*222*222*222*222
  
```

```

left  -----GCTCTGTCGCCAGGTCGGACTGCGGA-----CTGCAGTGGC-----GCAATCTCGGCTC-----
chrom TAGATGTTATTACCACCATGCCAAAAGTATTTAATAGCTTCTTTGCCTAGCTATGGAATCTGTCCATAAAT
right TAGATGTTATTACCACCATGCCAAAAGTATTTAATAGCTTCTTTGCCTAGCTATGGAATCTGTCC-----
      22222*2*2*22*22***2*2*22*2*2222*2222**2*22*2*222222*2*****222*1N
  
```

```

left  -----ACTGCAAGCTCCGCTTCCCGGGTTCACGCCAT-TCTCCTG-----
chrom GTGGGGAGATAGAGTGGGTGCTTTCCTCCTAAGATCCTCCTAAGATCCTTAGGAGGTGC
right -----
      1N11NNN111NNN11N1NNN1N1N1NNN1N 111NNN1
  
```

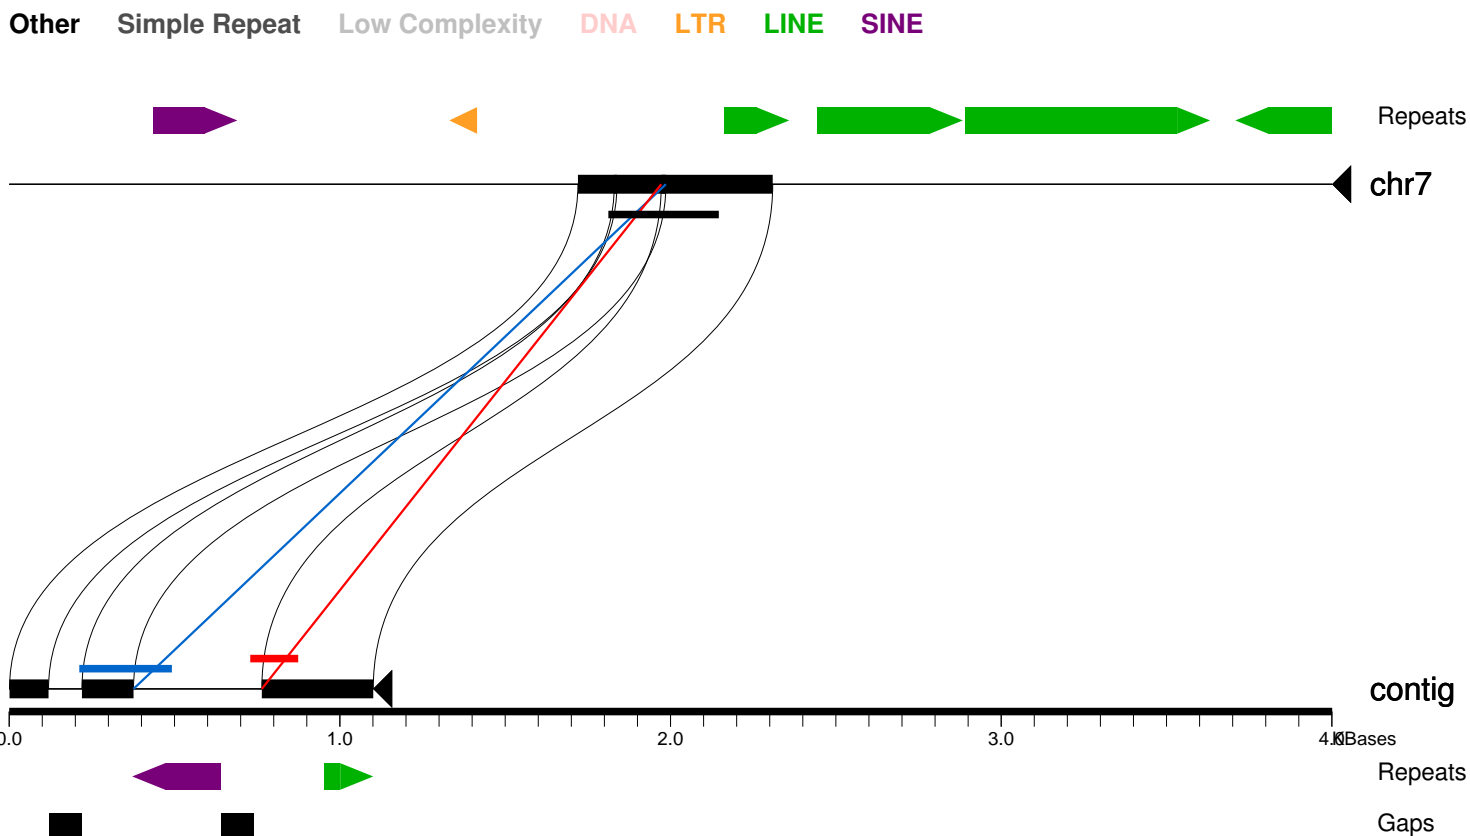

siteID: chr7\_125861728 Scafftig1 - Breakpoint: chr7:125861734

chr7:125861685-125861790

Overlap Length: 11 INS size: 303 Genotyped: Yes

```
left  AAAATAAT-----TTATCCCT---CCATTCAC-GAAGCTCAGTTTCACTGGGTACAAA---ATTTTGG
chrom AAAATAAT-----TTATCCCT---CCATTCAT-GAAGCTCAGTTTCACTGGGTACAAA---ATTCTTGG
right ACTGCAGTCCGCAGTCCGGCCTGGGCGACAGAGCGAGACTCCGTCTCAAAAAAAAAAAAAAAAAAAATTCTTGG
      *1111*1*111111*1111***111*1*111*N1**11***1**1***111111*1***111***1***
```

  

```
left  CTGGGCTGGGCGCGGTGGCTCACGCCTGTAATCCCAGCACTTTGGGAGGCCGAGGCGGGTGG
chrom CTG--ATAATCATTTTGTTTAAGGAGGCTAAAAA-----TGGGA--CCCAATCCCTTC-
right CTG--ATAATCATTTTGTTTAAGGAGGCTAAAAA-----TGGGA--CCCAATCCCTTC-
      **222*222*2222**22*2*2*2222***222222222222*****22**2*22*222*22
```

Other Simple Repeat Low Complexity DNA LTR LINE SINE

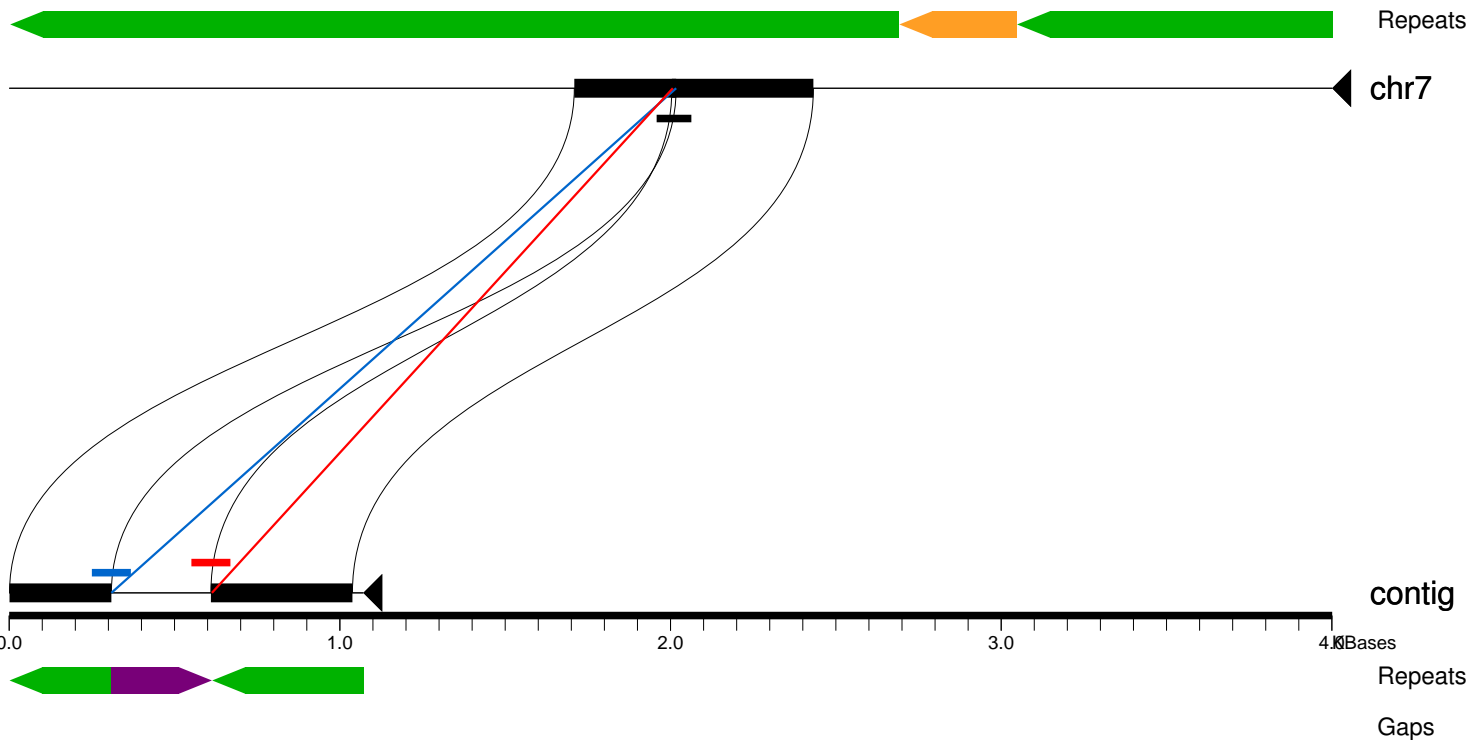

siteID: chr7\_126661396 Scaffold1 + Breakpoint: chr7:126661392

chr7:126661345-126661451

Overlap Length: 13 INS size: 296 Genotyped: Yes

```
left   CCCAGCTGCTT---CCTTT-AAGGAACTG--AAGCCAGAA---AGTACTGC---AGAGGGAATTTTTT
chrom  CCCAGCTGCTT---CCTTT-AAGGAACTG--AAGCCAGAA---AGTACTGC---AGAGGGAAATTTTTT
right  TCCGCCCGCCTCGGCCTCCCAAAGTGCTGGGATTACAGGCCTGAGCCACCGCGCCCGGCGAAATTTTTT
      1**11*1**1*111***111**1*11***11*111***11111**11**1**1111*11***2*****
```

```
left   TTTTTTTTTTTTTTTTTTGTGAGACGGAGTCTCGCTCTGTGCGCCAGGCTGGAGTGCAGTGGC
chrom  TTAAAGAAATCAACTTCTCAGAAATATAATA-----AGCCAAGCC----TAAACTGT-
right  TTAAAGAAATCAACTTCTCAGAAATATAATA-----AGCCAAGCC----TAAACTGT-
      **2222222*2222**2*2***222*222*222222222*****2**22222*22*2**22
```

Other   Simple Repeat   Low Complexity   DNA   LTR   LINE   SINE

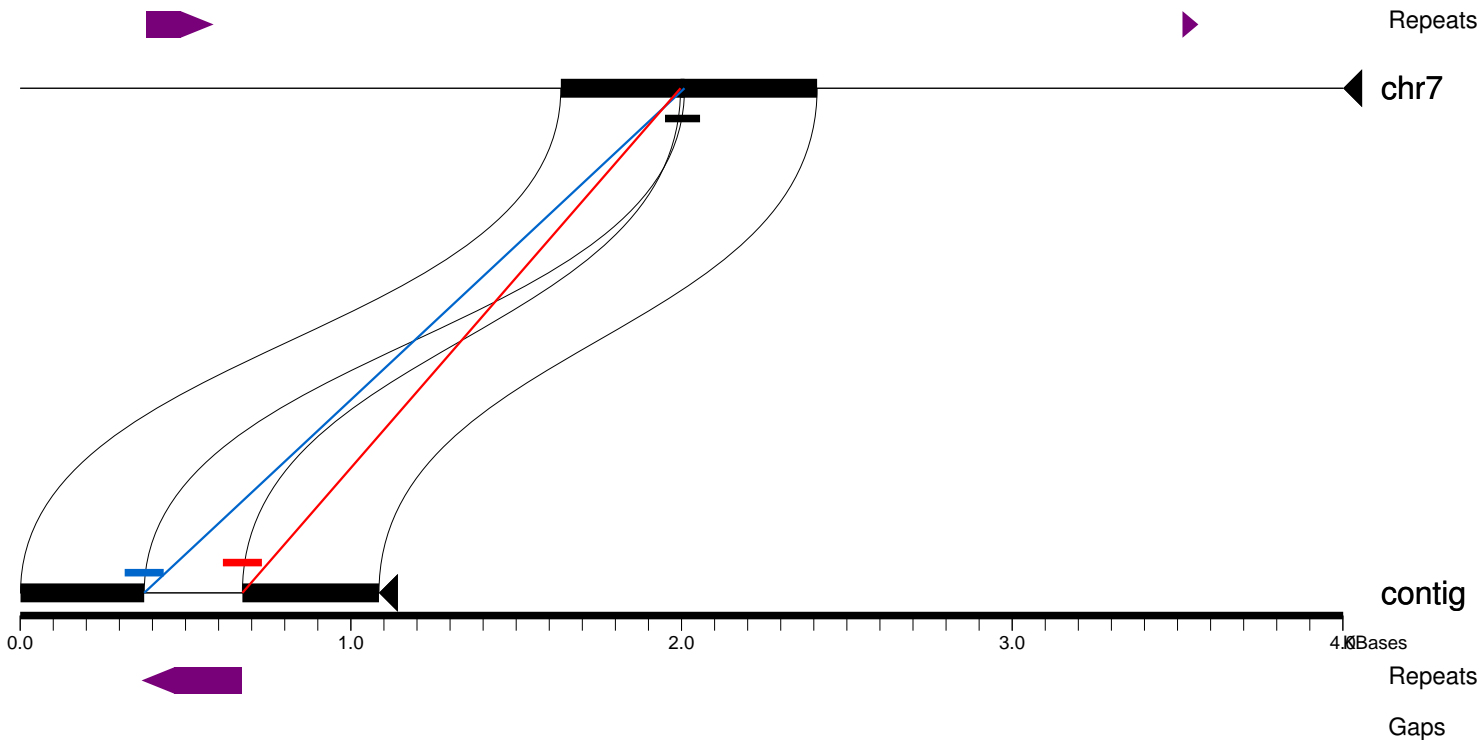





siteID: chr7\_13250247 Scaffold2 + Breakpoint: chr7:13250252

chr7:13250208-13250311

Overlap Length: 16 INS size: 314 Genotyped: Yes

```
left   TTTCCTGCA-CATTCTCACCAA-----CACTTGTATCTTTTGT--CTTTTGGATAAATACTTA
chrom  TTTCCTGCA-CATTCTCACCAA-----CACTTGTATCTTTTGT--CTTTTGGATAAATACTTA
right  CCACCCGCCTCGGCCTCCCAAAGTGCTGGGATTACAGGCGTGAGCTACCGCGCCCGGCCGATAAATACTTA
      111**1**11*111***1*1**111111111111**111**1*1**111*111*11111*****
```

```
left   TTCTTTTTTTTTTTTTTTTTTTTTTTTGGAGACGGAGTCTCGCTCTGTCGCCAGGCCGGACTGCG
chrom  TTCTTA-----AAGGTGTCAGATG--ATATGTCATTGTGGTTTTTAAGTTGCATTCC
right  TTCTTA-----AAGGTGTCAGATG--ATATGTCATTGTGGTTTTTAAGTTGCATTCC
      ****22222222222222222222*2*2**2*222*2*22*22**2*222222*22*22*2*2
```

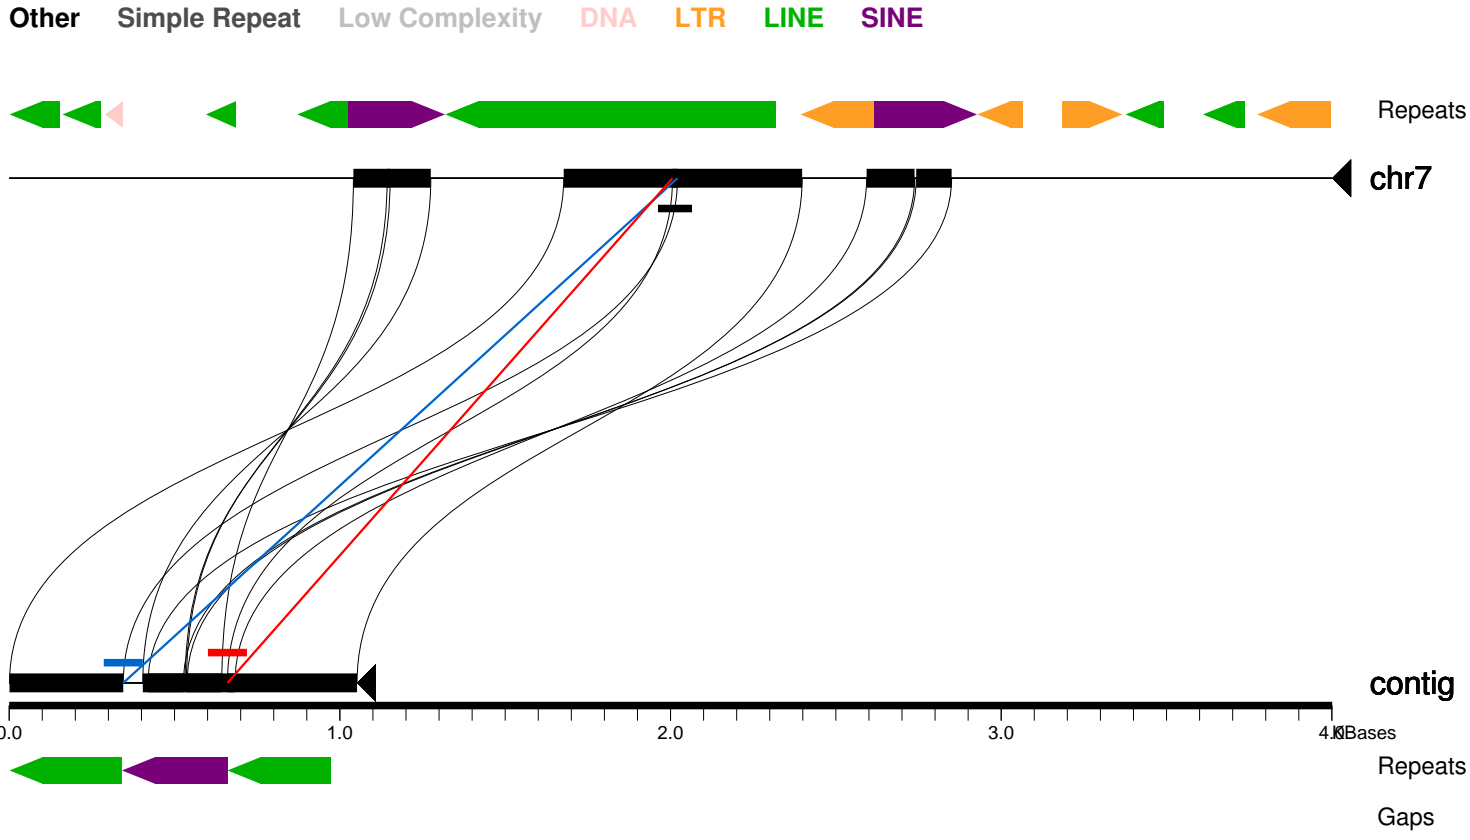

siteID: chr7\_134424662 Scaffitg1 - Breakpoint: chr7:134424642

chr7:134424597-134424701

Overlap Length: 15 INS size: 482 Genotyped: No

```
left  ----CAAACCTAAAGCCT--CAAATT----GGAGTCCAAGAGTAA-CAATCAA---ATGGCATAATTTTAT
chrom ----CAAACCTAAAGCCT--CAAATT----GGAGTCCAAGAGTAA-CAATCAA---ATGGCATAATTTTAT
right TCCGCCCGCCTCGGCCTCCCAAAGTGCTGGGATTACAGGCCTGAGCCACCGCGCCCGGCATAATTTTAT
      1111*111*1111****11****1*1111***1*1**1*1**1*1*1*1*1*1111111*1*****

left  TCTTTTTTTNNNNNNNNNNNNNNNNNNNNNNNNNNNNNNNNNNNNNNNNNNNNNNNNNNNNNNNNNNNNNN
chrom TCTTAAGT-----CACCTATTAAATGATGTCCACTACATTCTTCACTGATAATC
right TCTTAAGT-----CACCTATTAAATGATGTCCACTACATTCTTCACTGATAATC
      ***222*22222222222222222222222222222222222222222222222222222222222222
```

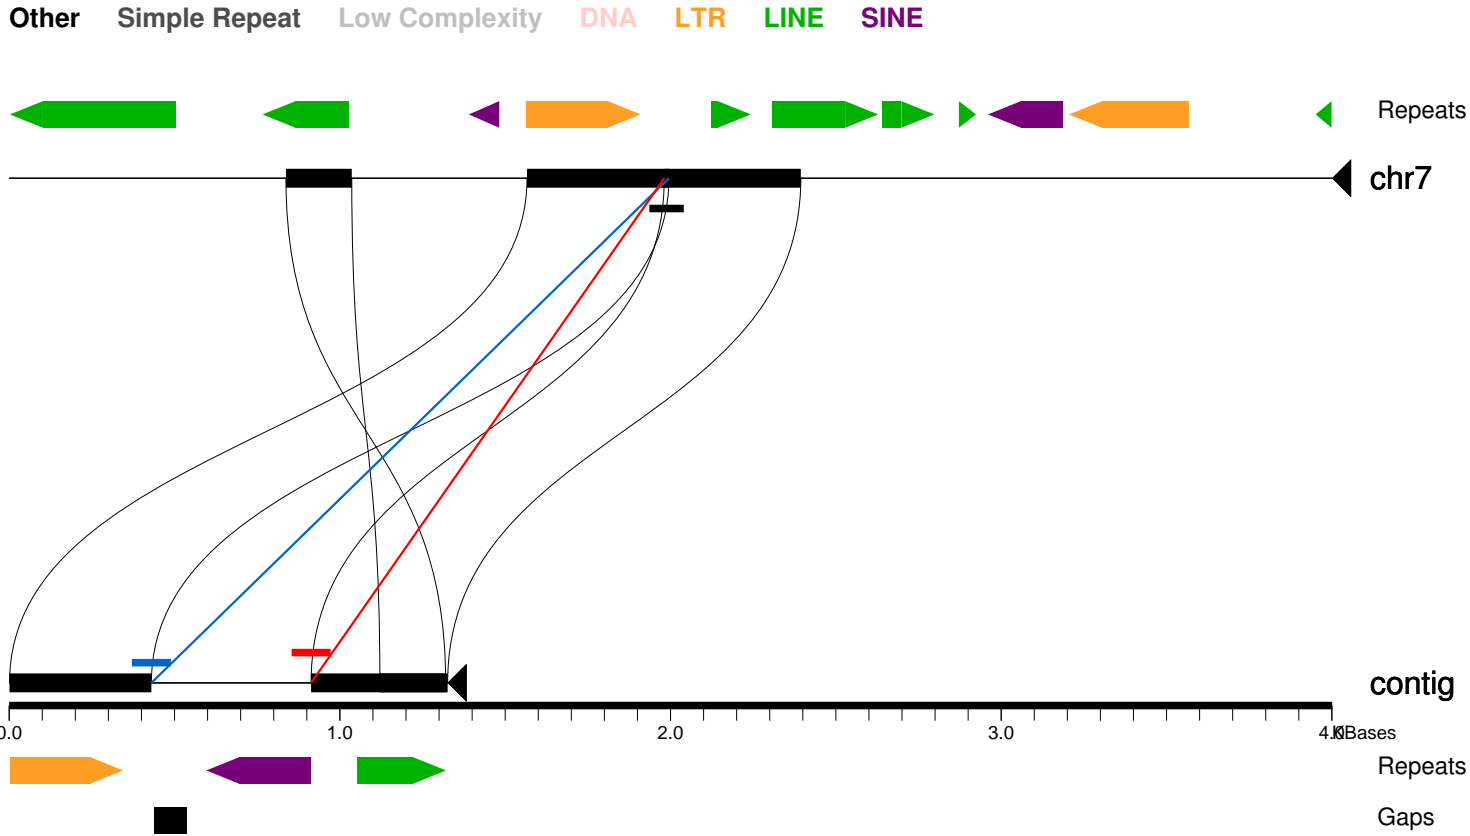

siteID: chr7\_136178789 Scafftig2 - Breakpoint: chr7:136178795

chr7:136178750-136178854

Overlap Length: 15 INS size: 299 Genotyped: Yes

```
left  TT-CAGTAGTCCAGAC-----CACCTGAAATAGG-----ATGGCAACTGAGGTGACAGAAAACAGGG
chrom TT-CAGTAGTCCAGAC-----CACCTGAAATAGG-----ATGGCAACTGAGGTGACAGAAAACAGGG
right CCACTGCACTCCAGCCTGGGCGACAGCGAGACTCCGTCTCAAAAAAAAAAAAAAAAAAAAAAAGAAAACAGGG
      111*1*1*1*****1*1111111**1*111*1*11*111111*1111**111*1111*1*****
```

```
left  AATAAGGCCGGGCGCGGTGGCTCACGCCTGTAATCCCAGC-ACTTTGGGAGGCCGAGGCCGGGCGG
chrom AATA--CCTGAAAGAATGAA-----AATGGAAAGACAGTGACTATGGGATGCAAAA-----
right AATA--CCTGAAAGAATGAA-----AATGGAAAGACAGTGACTATGGGATGCAAAA-----
      ***22*2*222222**222222222**2**222***22***2*****2**22*222222222
```

Other Simple Repeat Low Complexity DNA LTR LINE SINE

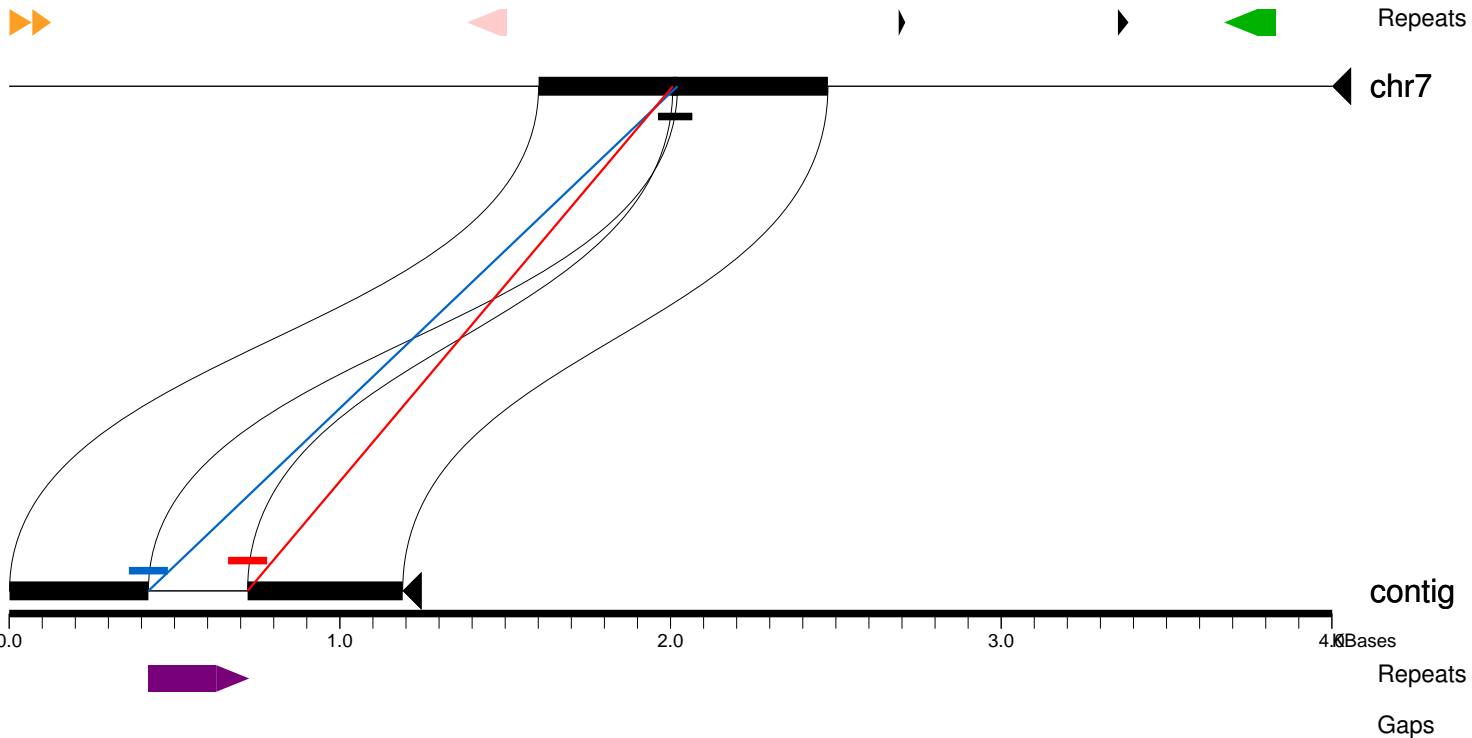

siteID: chr7\_141013580 Scaffitig1 - Breakpoint: chr7:141013582  
 chr7:141013531-141013639  
 Overlap Length: 9 INS size: 295 Genotyped: No

```

left  AATGGAGATGTGGCTTCCCGTGGGCAAACCTGGACATATTTTTATGTTTA-----AAAAAATCTG
chrom AATGGAGATGTGGCTTCCCGTGGGCAAACCTGGACATATTTTTATGTTTA-----AAAAAATCTG
right NNNNNNNNNNNNNNNNNNNNNNNNNNNNNNNNNNNNNNNNNNNNNNNNNNNNNNNNNNNNNNNNNAAAATCTG
    11111111111111111111111111111111111111111111111111111111111111111111*******

left  GGCCGGG-CGCGGTGGCTCACGCCGTGAATCCCAGCACTTTGGGAGGCCGAGGCGGGCGG-
chrom CATTGCACTTTGTGCATTATTGATGT-----GCGTCTTTGGA-----AGGAGGGCATT
right CATTGCACTTTGTGCATTATTGATGT-----GCGTCTTTGGA-----AGGAGGGCATT
    22222*22*222***22*2*2222***2222222**222**2***22222***2***222

```

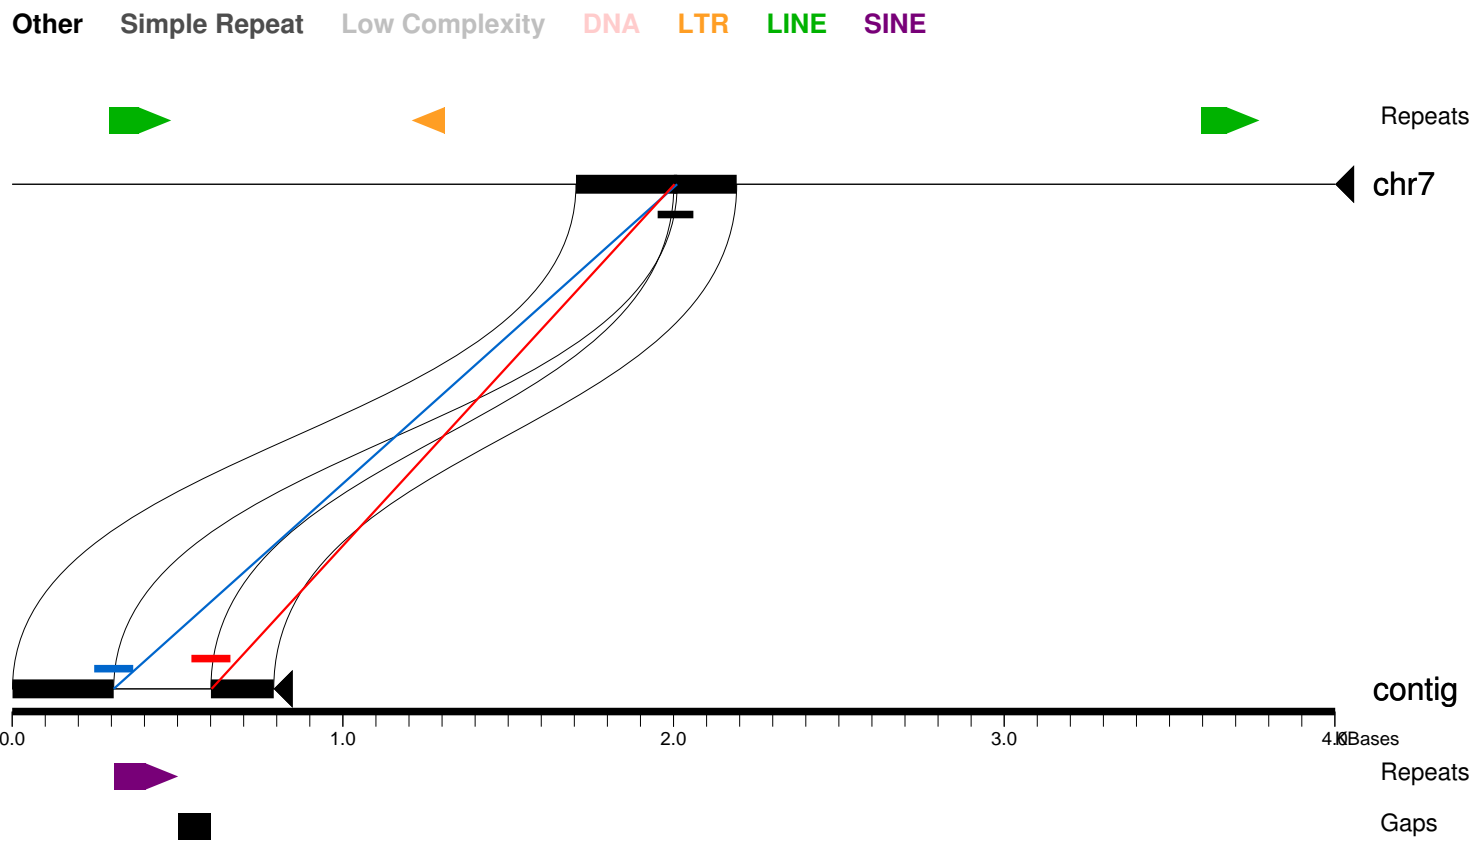



siteID: chr7\_147704410 Scafftig1 + Breakpoint: chr7:147704390

chr7:147704342-147704446

Overlap Length: 12 INS size: 307 Genotyped: Yes

```
left  AAATGTAGGACTTCGTTGTACTTGGGGGATTACTTC-----AATTGCCTTAATAGTCTA
chrom AAATGTAGGACTTCGTTGTACTTGGGGGATTACTTC-----AATTGCCTTAATAGTCTA
right CACTCCAG--CCTGGGCGACAGAGCGAGACTCCGTCTCAAAAAAAAAAAAAAAAAAAAAAAAGTCTA
      1*1*11*11*1*1*1*1*11111*1*1**1*1*1**1111111111111111**1111111**1*****
```

```
left  CCAGAGGCCGGGCGCGGTGGCTCACGCCGTGTAATCCCAGCACTTTGGGAGGCCGAGGCGGGCGGA
chrom CCAGAGT-----AGAAATATTACATTCTTTAAAGTTCAGATAAATA-----ATTTGTGCTG-
right CCAGAGA-----AAAAATATTACATTCTTTAAAGTTCAGATAAATA-----ATTTGTGCTG-
      *****N2222221222*2222**22*2*22**222***22222*222222222*222*2**2*2
```

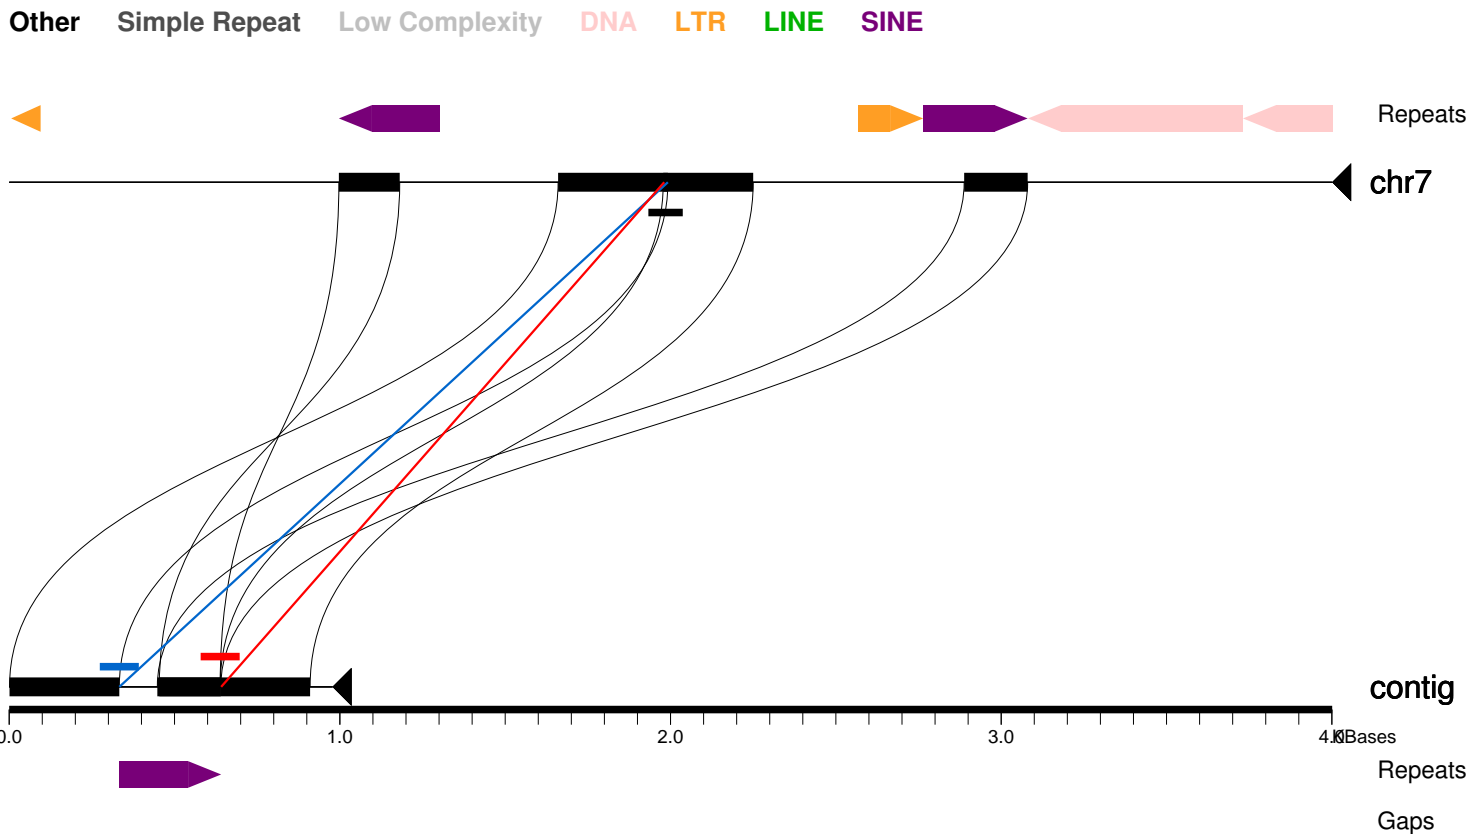

siteID: chr7\_147919503 Scafftig2 - Breakpoint: chr7:147919509

chr7:147919349-147919725

Overlap Length: 57 INS size: 338 Genotyped: No

```
left      G-----  
chrom    GTAATTTA-TAAAGAAAAGGAATTTATTTCTTATAGTTATGGAGGCTAAGAAGTCTGAGGCCAAAGGGCC  
right    ----TTTAGTAGAGACGGGG-----TTTCACCTTGTTAGCCAGGATG----GTCTCGATCT-----CC  
1        2222122N222NNN22      2222NNN2N2222NNN222N2N      2222NNNN2N      22
```

```
left      -----CCTTATTACTGGTGGGAACTCTCTGCAGTTCTGAGACAGTGCAGGGCATGACATGG  
chrom    AAACCTGGTGAGGGCCTTATTACTGGTGGGAACTCTCTGCAGTTCTGAGACAGTGCAGGGCATGACATGG  
right    TGACCTCATGAT--CC-----ACCCGC-----CTCGGC----CTCCCAAAGTGCTGGG-ATTACA-GG  
NN2222NN222N  **11111**11*11111111***1**1111**111*1*****1***1**1***1**
```

```
left      CGAGGTTAAGCTGCCAGCTCAGGCCTCTCTTCCTCTTCTTTAGACAGTCCCACTCCCATGAGAACCTGT  
chrom    CGAGGTTAAGCTGCCAGCTCAGGCCTCTCTTCCTCTTCTTTAGACAGTCCCACTCCCATGAGAACCTGT  
right    CGTG---AGCCACCGCGCCC*GCCTCT--TCTCTTCTTATAGACAGTCCCACTCCCATGAGAACCTGT  
**1*1111**11*1111*1*****11*****2*****
```

```
left      TAATCCA*NNNNNNNNNN-----  
chrom    TAATCCA*TAACCCATTAATCCATGAATCTATGAATGGATCATTCCATGAATCGATGAATGGATCATTCC  
right    TAATCCATTAACCCATTAATCCATGAATCTATGAATGGATCATTCCATGAATCGATGAATGGATCATTCC  
*****2222222222222222222222222222222222222222222222222222222222222222222222
```

```
left      -----  
chrom    ATGAATCGATGAATGGATCATTCCATGAATCTATGAATGGATCATTCCATTCATGAGGACAGAGTCCTCA  
right    ATGAATCTATGAATGGATCATTCCATGAATCTATGAATGGATCATTCCATTCATTC-----  
2222222N222222222222222222222222222222222222222222222222222222222222222222222
```

```
left      -----  
chrom    TGATCCAATCACCTCTTAAAGGGCTCAC  
right    -----
```

Other Simple Repeat Low Complexity DNA LTR LINE SINE

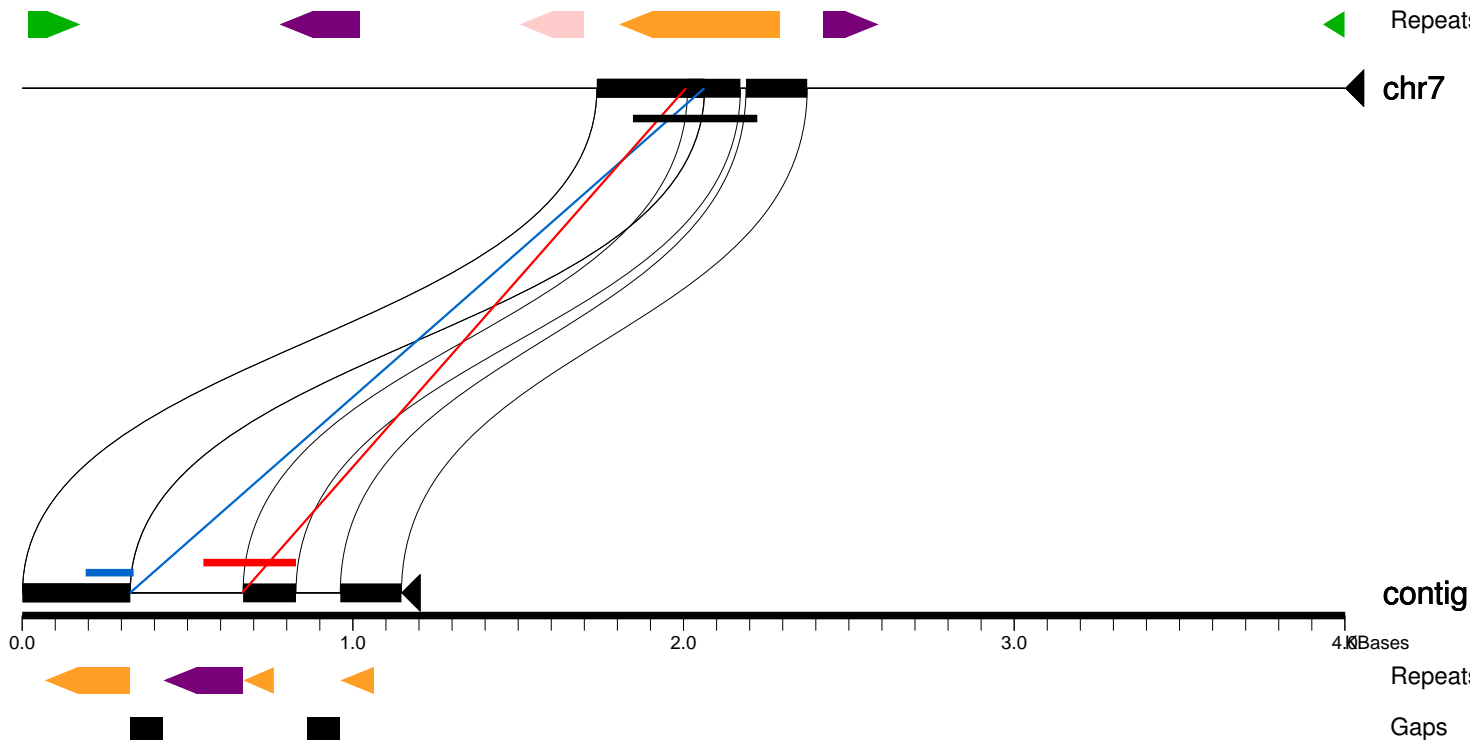







siteID: chr7\_153966048 Scafftig18 - Breakpoint: chr7:153966037

chr7:153965991-153966096

Overlap Length: 14 INS size: 299 Genotyped: Yes

```
left  TAA--CACAAAGATCCTGT-CATCTCA-CTAGACTATGT-----AAATTTGCAGATAAAAAATGCCCA
chrom TAA--CACAAAGATCCTGT-CATCTCA-CTAGACTATGT-----AAATTTGCAGATAAAAAATGCCCA
right CACTGCACCTCCAGCCTGGGCGACAGAGCGAGACTCCGTCTCAAAAAAAAAAAAAAAAAAAAAAATAAAAAATGCCCA
      1*1111***111*1****11*11*11*1*1*****11*1111111111***11111*1*1*****
```

```
left  TCT--GGCCGGGCG--CGGTGGCTCACGCCTGTAATCCCAGCACTTTGGGAGGCCGAGGCGGGCGG
chrom TCTTAGATTGGTCAGCCTGGGGGTGAAAA-TGGACTCA-ACCACTT-----CTATC-----
right TCTTAGATTGGTCAGCCTGGAGGTGAAAA-TGGACTCA-ACCACTT-----CTATC-----
      **22*222**2*222*2*21*2*2*2222**2*2**22*2*****22222222*2*22222222
```

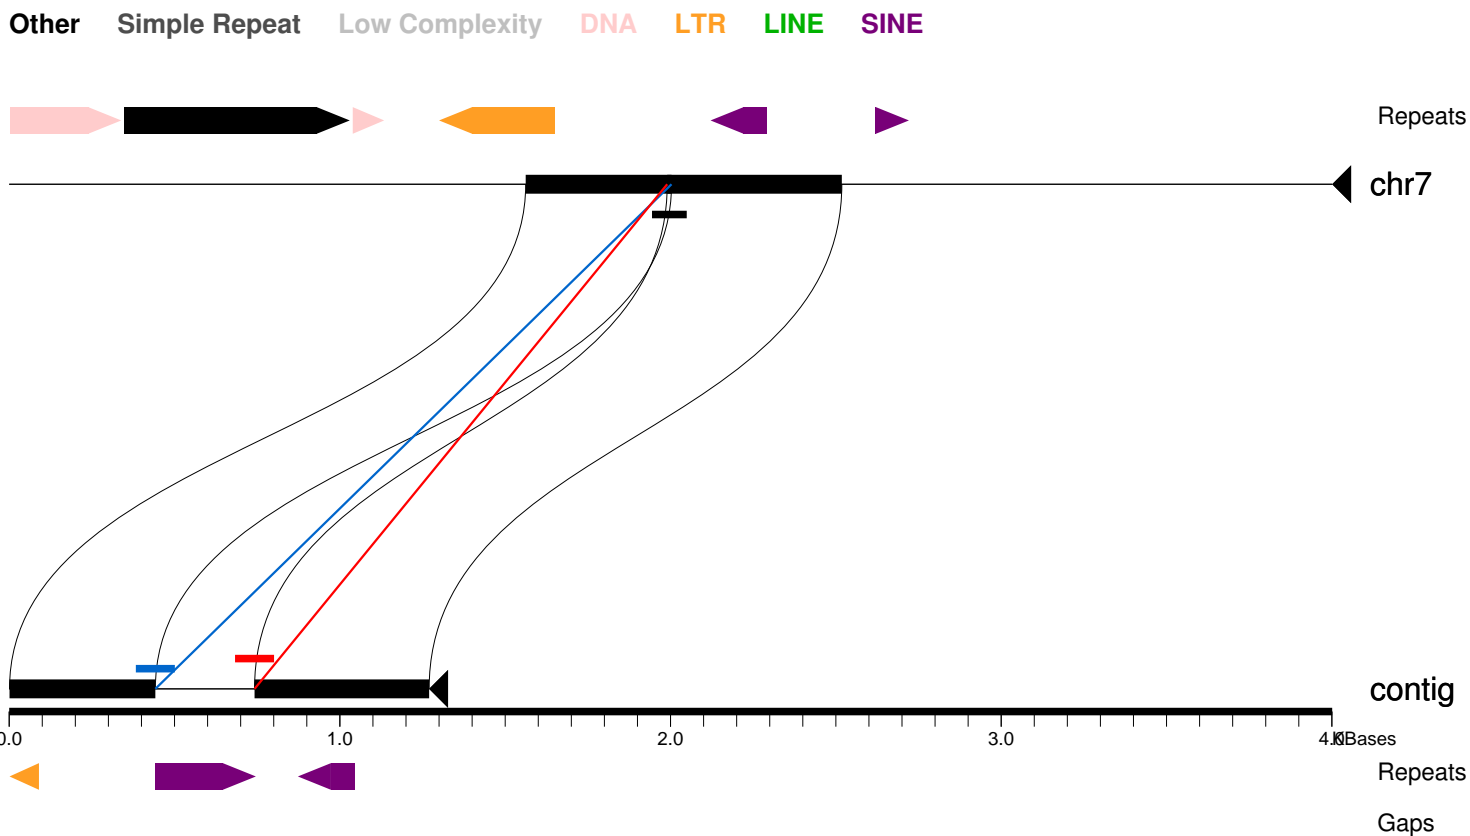

siteID: chr7\_154858211 Scafftig9 + Breakpoint: chr7:154858207

chr7:154858161-154858266

Overlap Length: 14 INS size: 298 Genotyped: Yes

```
left  TATCATAAAA--TCCTCATGGAGTTTTTTTCCCATTACAGGT-----ACTCCTA-----GTAACATAA
chrom TATCATAAAA--TCCTCATGGAGTTTTTTTCCCATTACAGGT-----ACTCCTA-----GTAACATAA
right CCGCCCGCCTCGGCCTCCCAAAGTGCTGGG--ATTACAGGCGTGAGCCACCGCGCCCGGCCGTAACATAA
      111*1111111111****1111**11*11111*****1111111*1**1111111111*****
```

```
left  GCTTTTTTTTTTTTTTTTTTTTTTGGAGACGGAGTCTCGCTCTGTCGCCAGGCTGGAGTGCAGTG-G
chrom GCTTTGCAAAT-----CATAAAGCCAAG-----CAGTTGGGCTGCTTTCAGTGCAGCCAG
right GCTTTGCAAAT-----CATAAAGCCAAG-----CAGTTGGGCTGCTTTCAGTGCAGCCAG
      ***22222*222222222*22**2*22**2222222*2**2*22*2*22*22*2*****222*
```

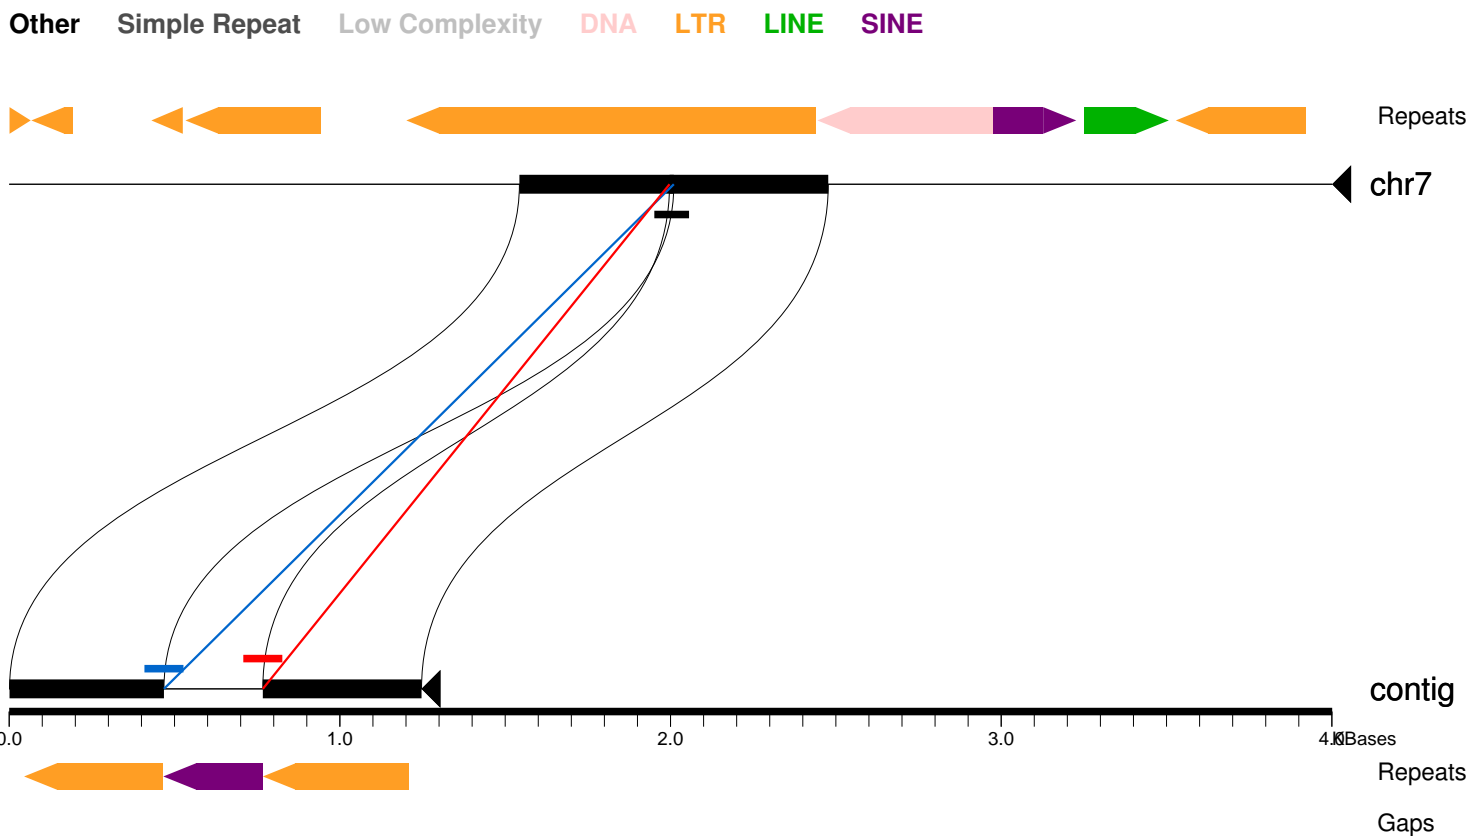

siteID: chr7\_157350779 Scafftig1 + Breakpoint: chr7:157350779

chr7:157350619-157350954

Overlap Length: 16 INS size: 324 Genotyped: Yes

```
left  CCA-----GGAGGACAGGGAATTGTGCAAAAATATCCTGGTAAGTTTCTATCGACTGCTGGA
chrom CCATCCCAATACTCCAGGAGGACAGGGAATTGTGCAAAAATATCCTGGTAAGTTTCTATCGACTGCTGGA
right -----TTTAGTAGAGACGGGGTTTCACCTTGTTAGCCAGGATGGTCTCGATCTCCTG-----
111          2NN2*1**1111***11**111*1111**1**1**111**1**1**111111
```

```
left  CCATCCCATAATACTGTTGAGGTGCTGGCAGCATCAACGCGGAGACACCGGACCTCTGCACCCCTGTGCA
chrom CCATCCCATAATACTGTTGAGGTGCTGGCAGCATCAACGCGGAGACACCGGACCTCTGCACCCCTGTGCA
right --ACCTCATGATCCA-----CCCGCCTCGGCCTCCCAAAGTGCTGGGAT---TACAGGCGTGAGCC
11*1*1***1**1*11111111111*11**11*11*11*1*11**11111***1111*1**11*1**1*1
```

```
left  GGCGAGCACAGCTTCACGATTCAGGGGGGATTTGT-----TTTTTTTTTTTTTTTTTTTT
chrom GGCGAGCACAGCTTCACAATTCAGGGGGGATTTGTAAAAAGGGAAAAGACGAATACGATGGCTCCACAATT
right ACCGCGCCCGGCCT-----TCAAGGGGGGATTTGTAAAAAGGGAAAAGACGAATACGATGGCTCCACAATT
11**1**1*1**1*111N11*****222222222222222*2222*222*222222**
```

```
left  TTTTTTTTTTTTTTTTTTTTGGAGACGGAGTCTCGCTCTGTCTGCCAGGCCGGACTGCGGACTGCAGT--GGCG
chrom CCGAGTCCCTATCTGTGTGTGA---ACACGTGCACATTGGTGC--GACGCGGTGCCACCCGAGTTTGCTG
right CCGAGTCCCTATCTGTGTGTGA---ACACGTGCACATTGGTGC--GACGCGGTGCCACCCGAGTTTGCTG
22222*22*2*2*2*2**2**22*22*22**2*22*2*22*22*2**222***22**2*****22*22*
```

```
left  CAATCTCGGCTCACTGC-----AA-----GCTCCGCTTC---CCGG-----
chrom CCATCCCACCTACCTGCCCTGCACAACCAGTGCCAGGGCACCAGGGCAGGACCGAGATGCA
right CCATCCCACCTACCTGCCCTGCACAACCAGTGCCAGGGCACCAG-----
*2**2*22**22***2222222**2222222222**2**2NN1      111N
```

Other Simple Repeat Low Complexity DNA LTR LINE SINE

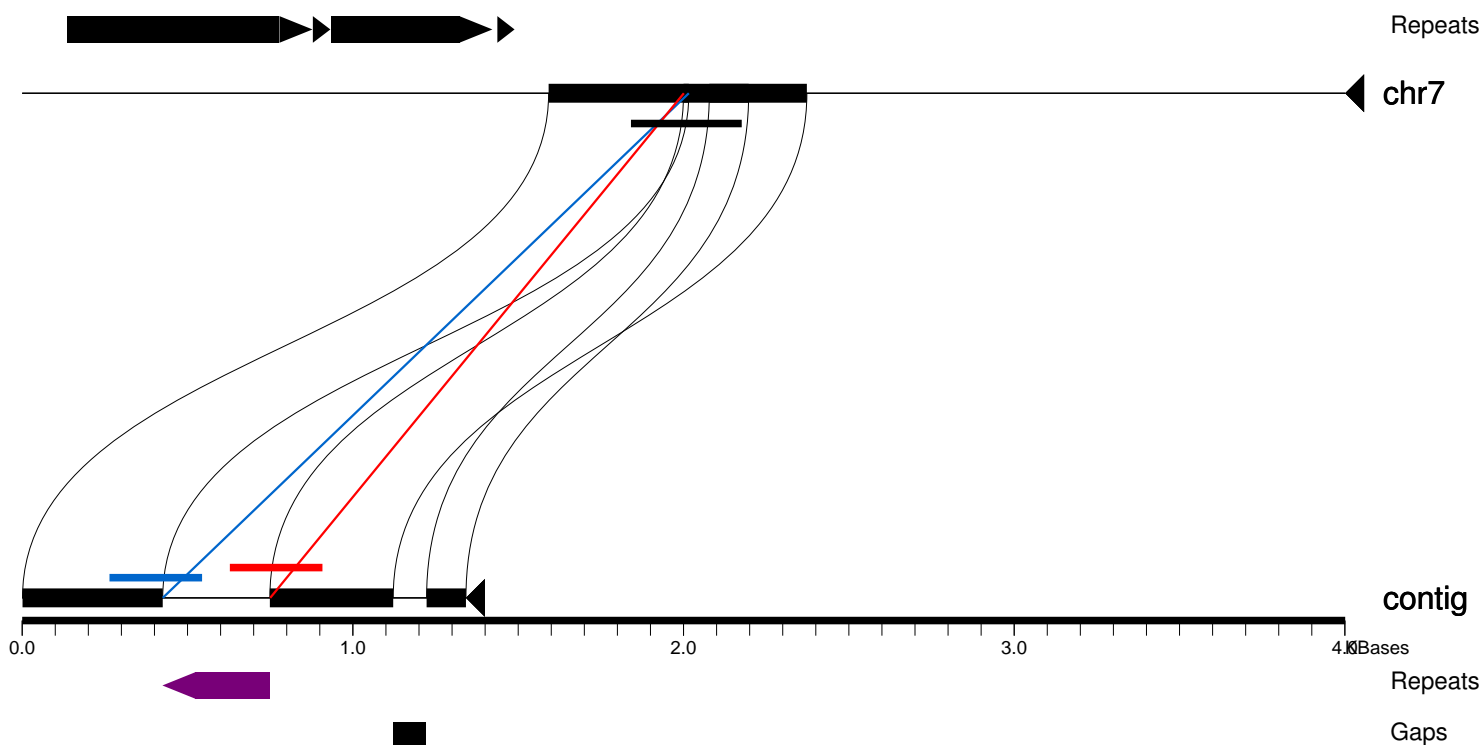

siteID: chr7\_157448783 Scafftig4 - Breakpoint: chr7:157448773

chr7:157448613-157448947

Overlap Length: 15 INS size: 302 Genotyped: Yes

```
left -----TGTCACAGCAGTGACATTTATTTACCCAAATGACGCTTGCTGGCCTTGAGTGCCAAG
chrom CCTCCTGCCTTGCTGTACAGCAGTGACATTTATTTACCCAAATGACGCTTGCTGGCCTTGAGTGCCAAG
right TTT-----AGTAGAGACGGGGTTTCACC-----GTTT--TAGCCGGGATGGTCTCG
NN2 111111**1**1***11111**1***11111111*1**11*1***11**11*1*11*
```

```
left GAGACAGCAGCTGCTTCCGAGTCAGAGGCCAAAAACGGCAGCGCACATGGTAGGCACTAACAGACGTGTA
chrom GAGACAGCAGCTGCTTCCGAGTCAGAGGCCAAAAACGGCAGCGCACATGGTAGGCACTAACAGACGTGTA
right ----ATCTTCTGA--CCTCGTGATCCGCCCGCCTCGGCCTCCCAAAGTGCTGGGATTA-CAGGCGTGAG
111111*1*11***111**11**1*111****1111****11*1**1*11*11**1*1**1***1***11
```

```
left TTCCACTGAAAACTAAATAGCGGGTGCTCACTCTT-----TTTTTTTTTTTTTTTTTTTTTTTT
chrom TTCCACTGAAAACTAAATAGCGGGTGCTCACTCTTACACACCAGGGACTGTGTGTGGGGGCTGCACGTTC
right --CCACCGCGCCCGGC---CGGGTGCTCACTCTTACACACCAGGGACTGTGTGTGGGGGCTGCACGTTC
11****1*1111*11111111*****1111111111*222222222222*2*2*2*222222*22222*2
```

```
left GAGACGGAGTCTCGCTCTGTGCGCCAGGCTGGAG----TGCAGTGGCGCGATCTC-----GGCTCACTGC
chrom CAGGCAGAAGCACGGCAAAGATCTCAGGAAGTAAATATTTCTTGTATTATCTAAATTAAGAAGACTCCCTGC
right CAGGCAGAAGCACGGCAAAGATCTCAGGAAGTAAATATTTCTTGTATTATCTAAATTAAGAAGACTCCCTGC
2**2*2**22*2**22222222*2****22*2*22222*222**2222*2*22*222222*2***2****
```

```
left A-----AGC-----TCCGCCTC-----CCGGGTTACGCCATTCTCCTGCC
chrom AGAAAAGAGCCCTGCCTGTGACGCTCTGCAGCGGGCAGGGTGCA-GCCATCATC--GCC
right AGAAAAGAGCCCTGCCTGTGACGCTCTGCAGCGGGCAGGGTG-----
*22222***22222222*2****22222222*2****211211111NN1122111
```

Other Simple Repeat Low Complexity DNA LTR LINE SINE

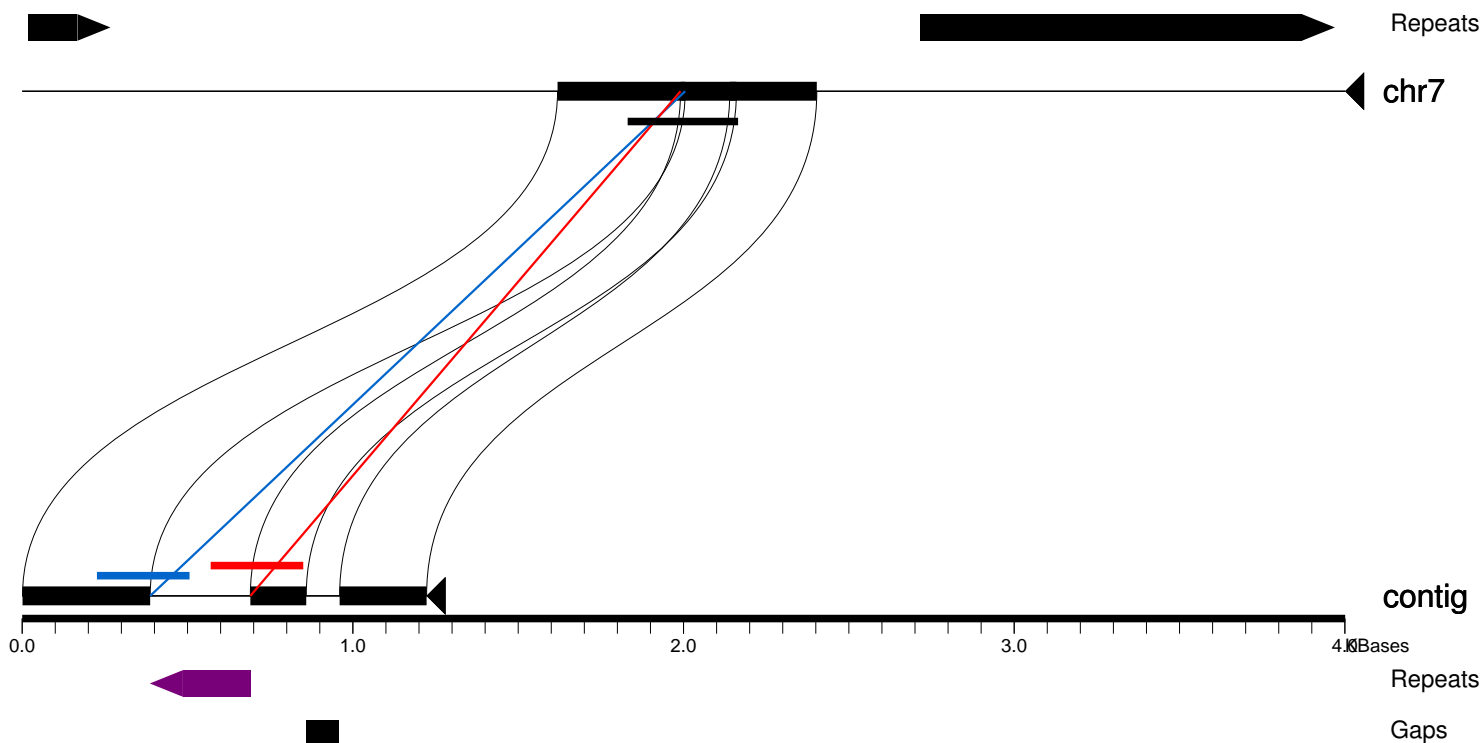

siteID: chr7\_18168364 Scafftig1 + Breakpoint: chr7:18168358

chr7:18168304-18168417

Overlap Length: 6 INS size: 422 Genotyped: No

```
left  ACAGATGTAT-----TCAAAAAATT---GAATGGCATGTTTTACCTAAATGGTAGGGGTTAGGGAAGANN
chrom ACAGATGTAT-----TCAAAAAATT---GAATGGCATGTTTTACCTAAATGGTAGGGGTTAGGGAAGATA
right CCACCCGCCTCGGCCTCCCAAAGTGCTGGGATTACAGGCGTGAGCCACCGCGCCCGGCC---GGAAGATA
      1**111*11*11111**11***1*1111*1**11**1*11*1*1*1*1111*111**11111*****22
```

```
left  NNNNNNNNNNNNNNNNNNNNNNNNNNNNNNNNNNNNNNNNNNNNNNNNNNNNNNNNNNNNNNNNNNNNNNNNN
chrom GCTTCTTAATGGGTCTTTGTGCCATGTCTCTTTATTCTTATGATTAGTACA-----
right GCTTCTTAATGGGTCTTTGTGCCATGTCTCTTTATTCTTATGATTAGTACA-----
      22222222222222222222222222222222222222222222222222222222222222222222
```

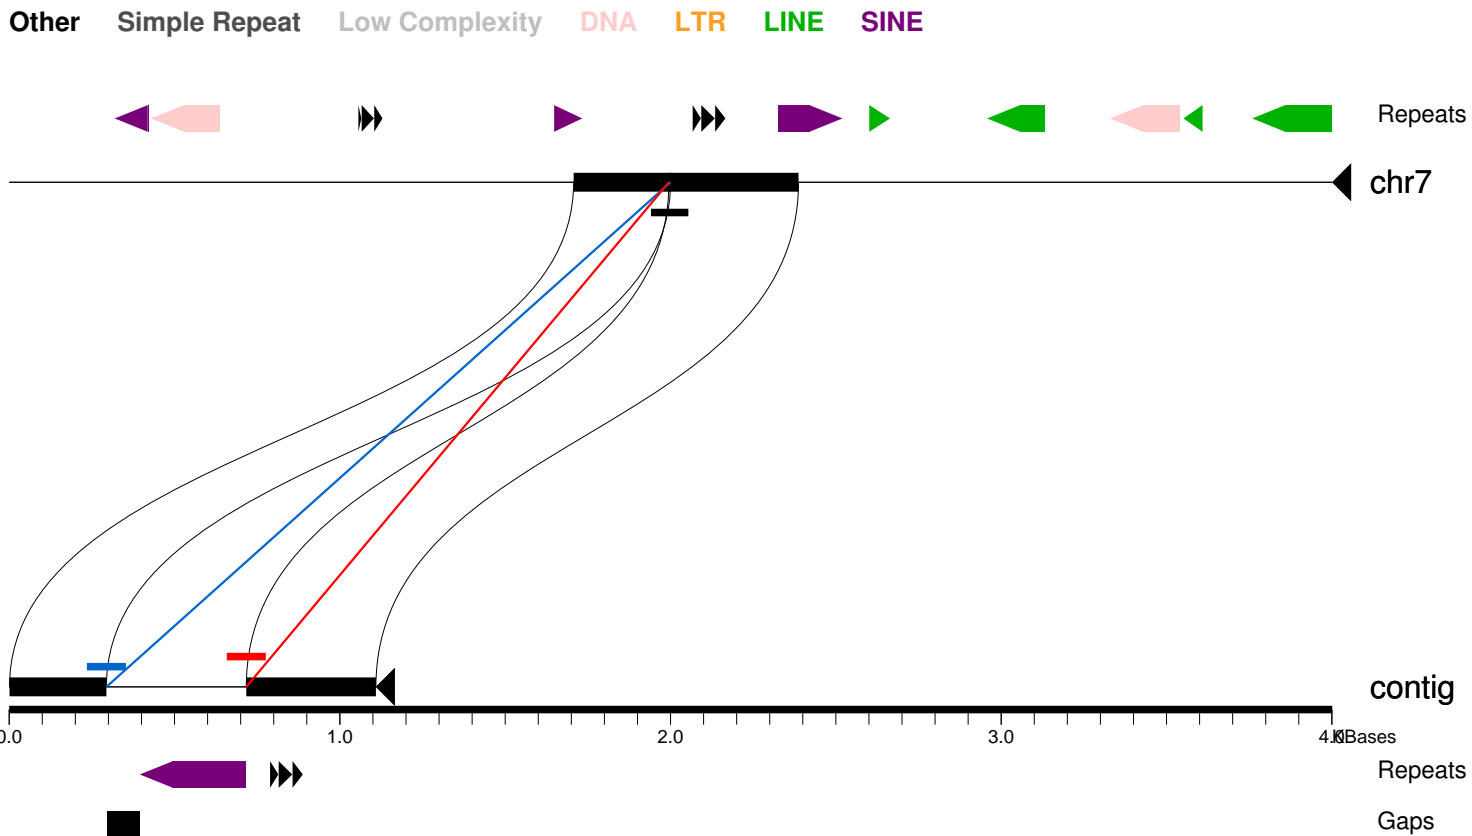

siteID: chr7\_18322587 Scaffitg3 - Breakpoint: chr7:18322589

chr7:18322541-18322648

Overlap Length: 12 INS size: 376 Genotyped: No

```
left  -----GTAATAAAATAGGGTA-TGTGAAACTCTTTGACCT--TTTCTGGT--TCTCAG--TGCCTTGAAA
chrom -----GTAATAAAATAGGGTA-TGTGAAACTCTTTGACCT--TTTCTGGT--TCTCAG--TGCCTTGAAA
right TCACCGTGTTAGCCAGGATGGTCTCGATCTCCT-GACCTCGTGATCCGCCCGCCTCGGCC*TGCCTTGAAA
      111111**11**111***1*11*1*11*1***1*1*****11*11*1*11111***1*11*******
```

  

```
left  TTNNNNNNNNNNNNNNNNNNNNNNNNNNNNNNNNNNNNNNNNNNNNNNNNNNNNNNNNNNNNNNNNNNNNNNNN
chrom  TTCTATCTCAATTTTGTAGATACTCAACACTCTAACCCAGCAAGGGGAG-----
right  TTCTATCTCAATTTTGTAGATACTCAACACTCTAACCCAGCAAGGGGAG-----
      **22222222222222222222222222222222222222222222222222222222222222222222
```

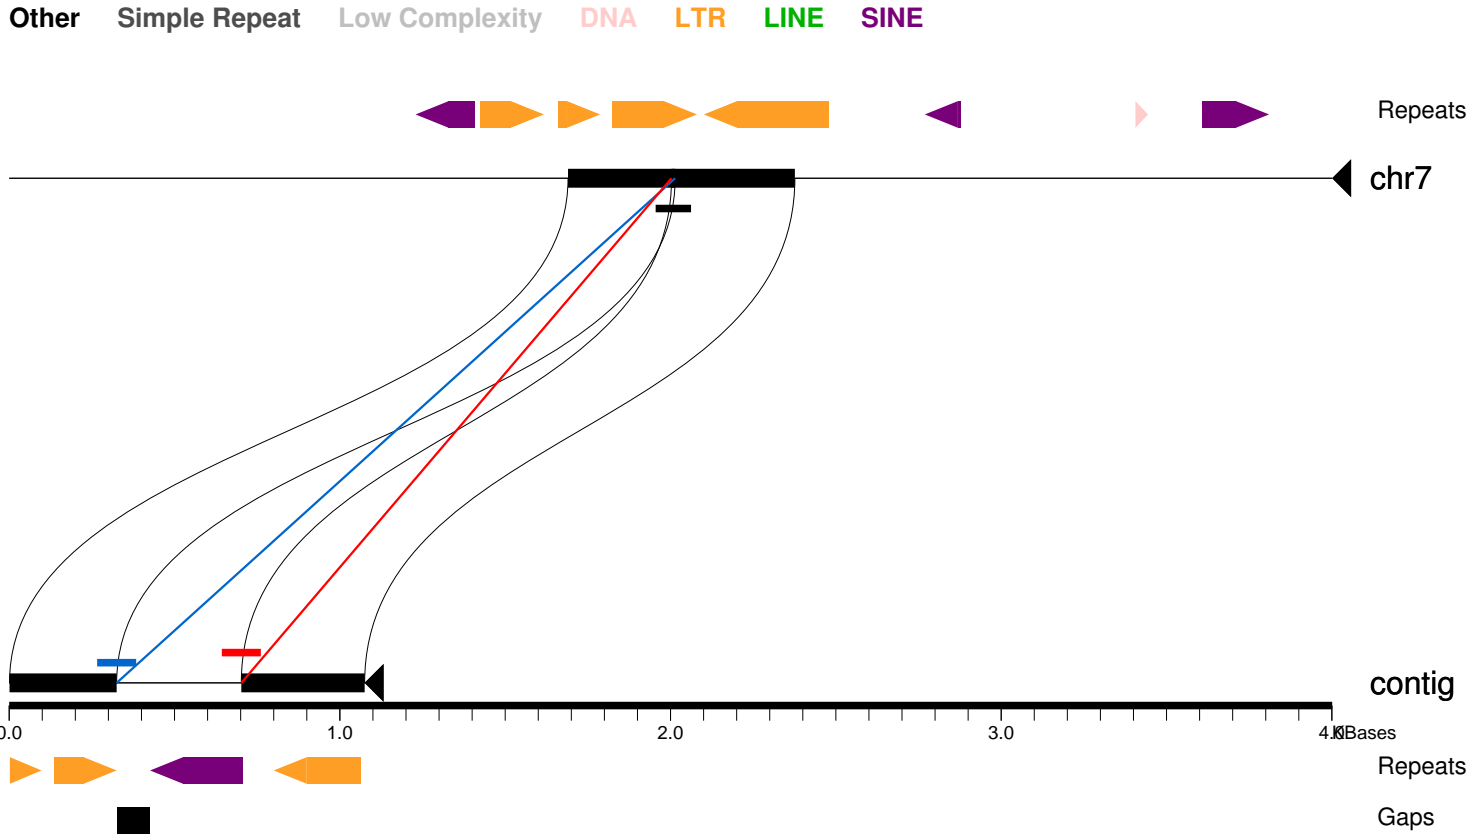





siteID: chr7\_22799821 Scafftig4 + Breakpoint: chr7:22799808

chr7:22799756-22799867

Overlap Length: 8 INS size: 431 Genotyped: No

```
left TC-----AATAATCAAACATAATT--TAACAACCTCAAGAAAAGGAAAGTCTTGTTTTTACTGATTGTTNNN
chrom TC-----AATAATCAAACATAATT--TAACAACCTCAAGAAAAGGAAAGTCTTGTTTTTACTGATTGTTTT
right CCGCCCGCCTCGGCCTCCCAAAGTGCTGGGATTACAGGCGTGAGCCACCGCGCCCGGCCCTGATTGTTTT
      1*1111111*111*111*11**1*11*111*111**1*11111*11*111111111111******222
```

```
left NNNNNNNNNNNNNNNNNNNNNNNNNNNNNNNNNNNNNNNNNNNNNNNNNNNNNNNNNNNNNNNNNNNNNNNNN
chrom ACTCATCCCATGTTCTTTCTTCCTTCTTACTGTTCCAAGACTTTTTTATT-----
right ACTCATCCCATGTTCTTTCTTCCTTCTTACTGTTCCAAGACTTTTTTATT-----
      22222222222222222222222222222222222222222222222222222222222222222222
```

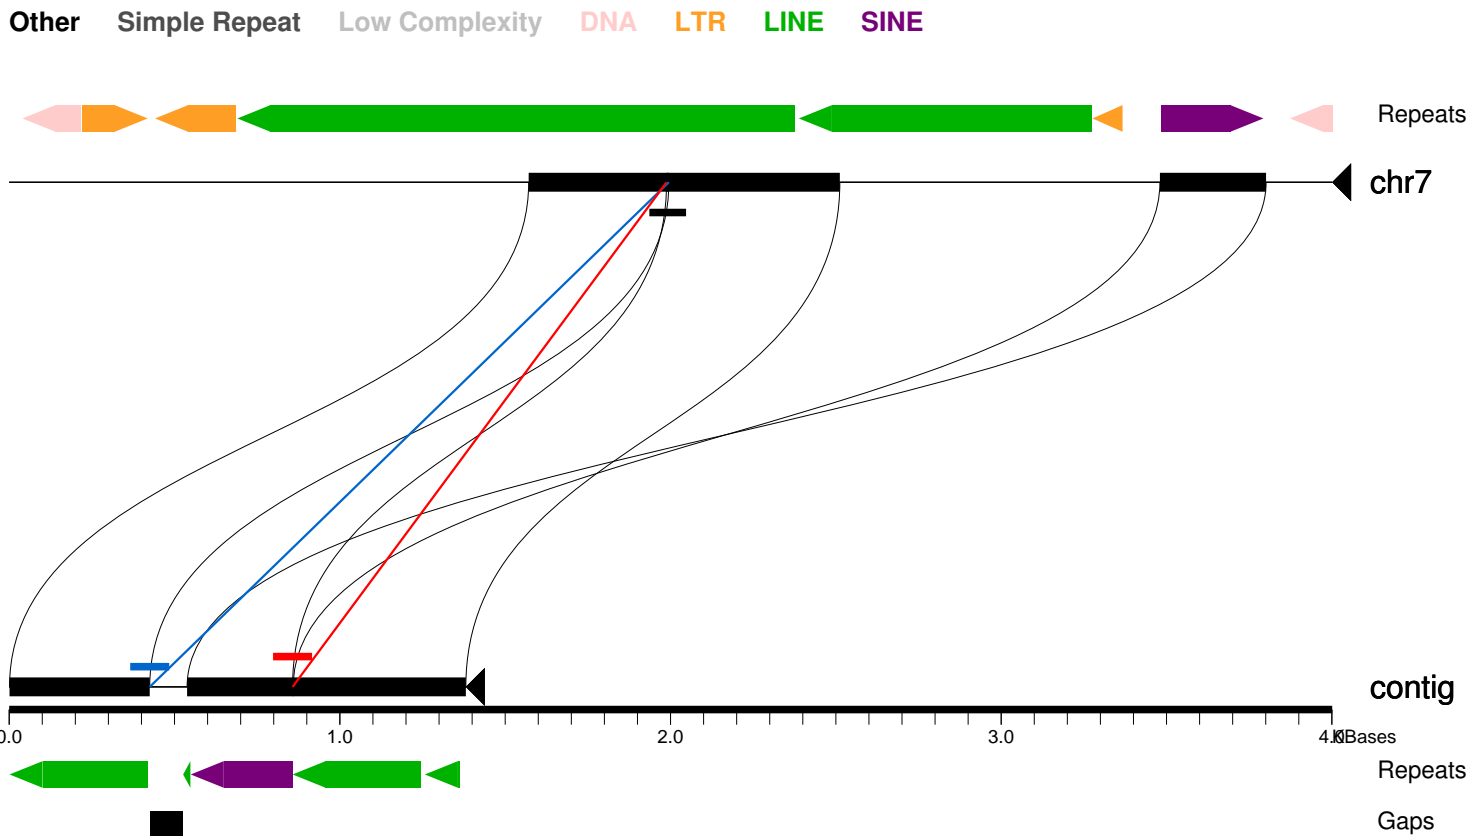

siteID: chr7\_24476603 Scaffitg1 + Breakpoint: chr7:24476614

chr7:24476455-24476784

Overlap Length: 11 INS size: 433 Genotyped: No

```

left  -----ACATTATATTACTGTCATTTGCCCAAGGTCATTATCAATCCAAACCCAGTGGAACTAGG
chrom GCTTCTTTCAACATTATATTACTGTCATTTGCCCAAGGTCATTATCAATCCAAACCCAGTGGAACTAGG
right NNNNNNNNNNNAA-----
NNNNNNNNNN11*11111111111111111111111111111111111111111111111111111111111111111111111111111111111
  
```

```

left  CCAAGCTGCTCATAAACTTCTCTTTGCGATCTACCACAGGAATGTCCTCCATCTCTCAAAAAGGGAGTTC
chrom CCAAGCTGCTCATAAACTTCTCTTTGCGATCTACCACAGGAATGTCCTCCATCTCTCAAAAAGGGAGTTC
right -----
1111111111111111111111111111111111111111111111111111111111111111111111111111111111111111111111111
  
```

```

left  ATTCTGTACCAATGATGTTAAGACCTTTACGGCCGGG-----CGCGG-----TGGCTCAC
chrom ATTCTGTACCAATGATGTTAAGACCTTTACAATGTAGATTTAACTTGAAAAGAATATAGAATATAGGAAAC
right -----AAGACCTTTACAATGTAGATTTAACTTGAAAAGAATATAGAATATAGGAAAC
1111111111111111111111111111111111111111111111111111111111111111111111111111111111111111111111111
  
```

```

left  GCCTGTAATCCA-GCCTTTGGGAGGCCGAGGCGGGTGGATCA-TGAGGTCAGGAGATCGA-----GAC
chrom TCATATAATCTTATGGTAACAGGGTCTAAAAATTTATATTTCATCACTCAGGTATGTAAAAACAAACATAGTT
right TCATATAATCTTATGGTAACAGGGTCTAAAAATTTATATTTCATCACTCAGGTATGTAAAAACAAACATAGT-
2*2*2*****22*2*222222***222222*222222*22****2*2****22*2*2*2*22222*2N
  
```

```

left  CATCC--TGGCTA---ACAAGGTGAAACCC-----CGTCTCTACTAAA
chrom TATCTATTCCCTATAAATAATCTGACATTCTTCAGGCCTACCTTATTGAC
right -----
N111N 1N111 1N11NN11N1NN1 1NN1NN11N1N1N
  
```

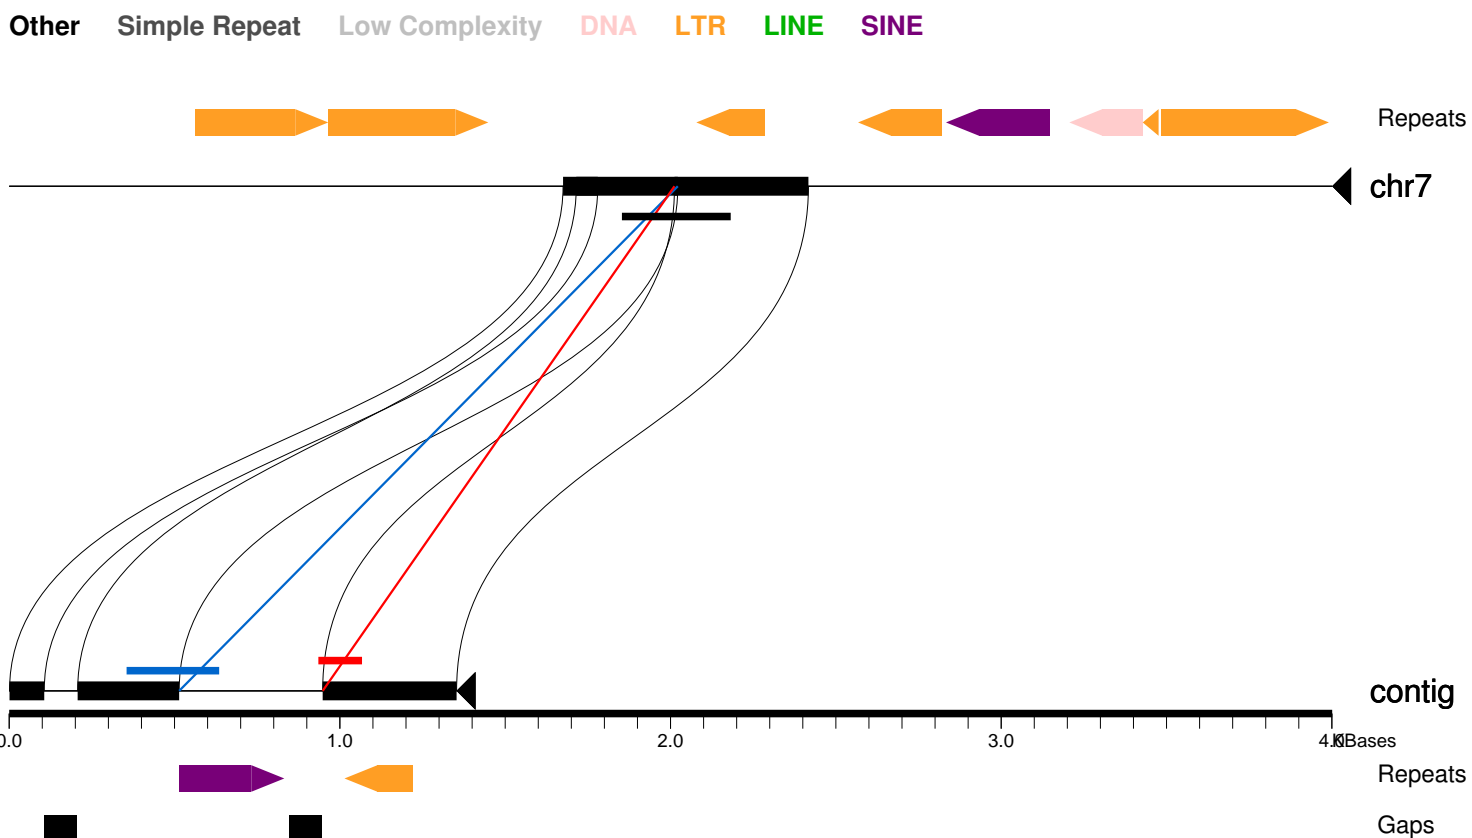



siteID: chr7\_33195310 Scaffitg1 - Breakpoint: chr7:33195318

chr7:33195270-33195377

Overlap Length: 12 INS size: 343 Genotyped: Yes

```
left      T-----GGCT--GTGTTACA---TTCTAGAAAACCTTTGTGTCTACT-CTGTCTCAGGTAAGAAATATTTT
chrom     T-----GGCT--GTGTTACA---TTCTAGAAAACCTTTGTGTCTACT-CTGTCTCAGGTAAGAAATATTTT
right     CCACCCGCCTCGGCCTCCCAAAGTGCTGGGATTACAGGCGTGAGCCACCGCGCCCGGCCAGAAATATTTT
          1111111*1**11*11*11**111*1**1*1*111111*1**111*11*1*111*1**11*****

left      TTTTTTCTTTTCTTTTTTTTTTTTTTTTTTTTTTTTTTTTTTTTTTTTTTTTTTTTTTTTTTTTTTTTTTTGAGACGG
chrom     TA-----CCAAATGTAGAATTTATATTACAAATTGGGCTTAATGTTATATGAGAA--
right     TA-----CCAAATGTAGAATTTATATTACAAATTGGGCTTAATGTTATATGAGAA--
          *2222222222*222*2*2222***2*2**22222**2222**22*2**2*2**2*****222
```

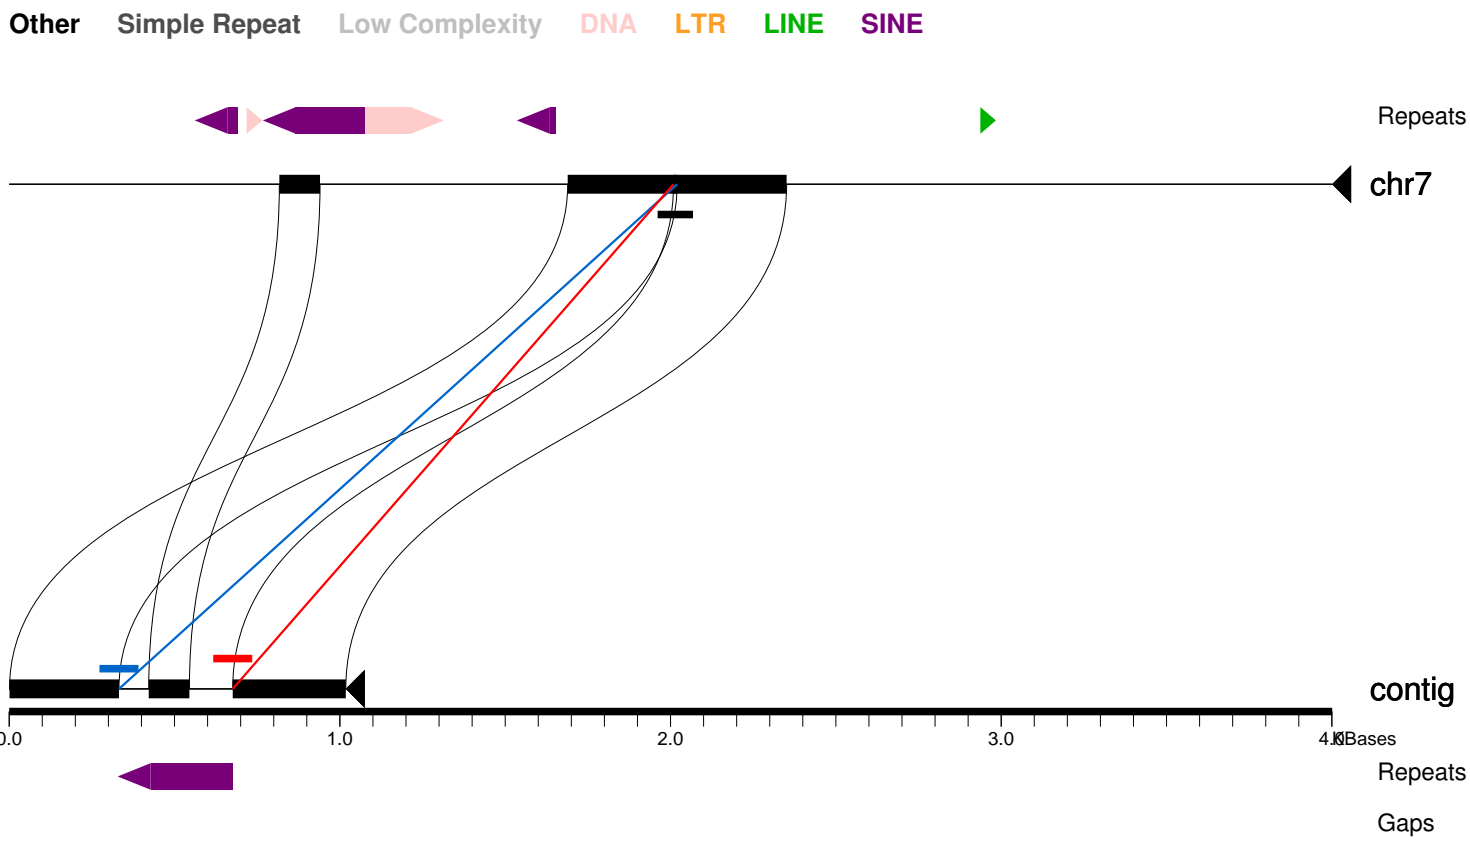



siteID: chr7\_34492793 Scaffitig2 + Breakpoint: chr7:34492788

chr7:34492742-34492847

Overlap Length: 14 INS size: 305 Genotyped: Yes

```
left  -ATTATAATCTCATTATCATGTGATTCCTGG-----AGGTTTTTTTGGGAAGGAGAATTCTAGG
chrom -ATTATAATCTCATTATCATGTGATTCCTGG-----AGGTTTTTTTGGGAAGGAGAATTCTAGG
right CACTCCAGCCTGGGCGACAGAGCGAGACTCCGTCTCAAAAAAAAAAAAAAAAAATAATAAAATAAGAATTCTAGG
      1*1*11*11**11111*1111*1**11*111*111111111111*1111*11*11**11*****
```

```
left  GCTGGGCCTGGGCGCGGTGGCTCACGCCTGTAATCCCAGCACTTCGGGAGGCCGAGGCGGGCG
chrom GCTAAATATAA-----TATAACCTGCGAATGAT--GATAATTTTG-----CCTATTTGT-CA
right GCTAAATATAA-----TATAACCTGCGAATGAT--GATAATTTTG-----CCTATTTGT-CA
      **22222*2222222*2222*22**222*2**222*22*2**2*22222**2*222*22*2
```

Other Simple Repeat Low Complexity DNA LTR LINE SINE

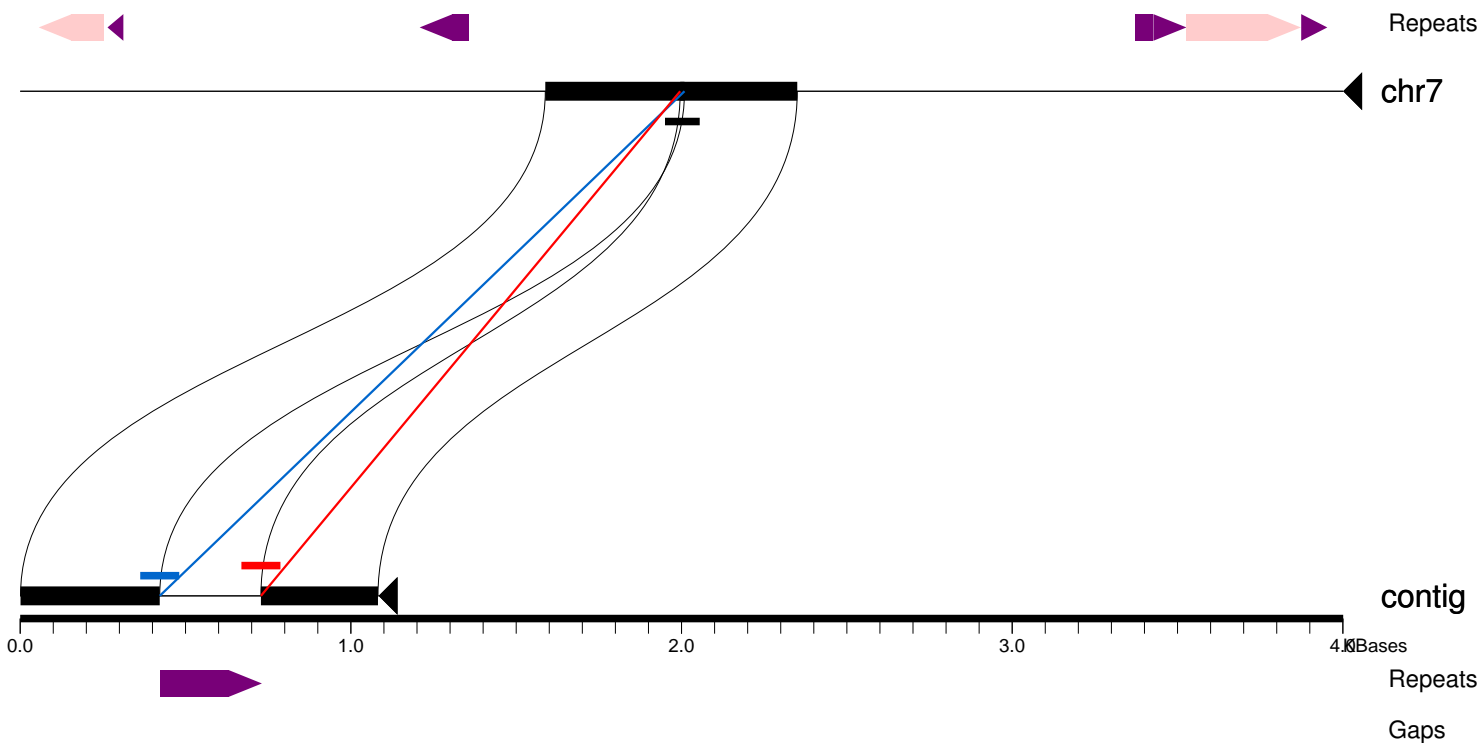

siteID: chr7\_36164928 Scaffitg1 + Breakpoint: chr7:36164880

chr7:36164275-36165041

Overlap Length: 58 INS size: 413 Genotyped: No

```

left  -----
chrom AGAAAGCTGGAGGCATCACGCTACCTGACTTCAAACCTATACTACAAGGCTACAGTAATCAAAACAGCATG
right NNNNNNNNNNNN-----
      NNNNNNNNNNNN
  
```

```

left  -----
chrom GTACTGGTACCAAAACAGATATATAGACCAATGGAACAGAACAGAGGCCTCAGAAATAACACCAGACATC
right -----
  
```

```

left  -----
chrom TACAGCCATCTGATCTTTTGACAAAACCTGACAAAAACAAGAAATGGGGAAAAGGATTCCTTACTTATAAAATA
right -----
  
```

```

left  -----
chrom GTGCTGGGAAAACTGGCTAGCCATATGTAGAAAAGCTGAAACTGGATCCCTTCCCTTATACCTTATAACAAAA
right -----
  
```

```

left  -----
chrom ATTAAGTCAAGATGGATTAAAGACTTAAATGTAAGACCTAAAAACCATAAAAAACCTTAGAAGAAAAACCTAG
right -----
  
```

```

left  -----
chrom GCAATACCATTTCAGGACATAGGCATGGGCAAAGACTTTCATGACTAAAAACCCAAAAGCAAAGGCCAACAAA
right -----
  
```

```

left  -----
chrom AGCCAAAAATTGACAAAATGGGATCTAATTTAAACTAAAGAGCTTCTGCACAGCAAAATAAAATTCACGCAGA
right -----
  
```

```

left  -----
chrom  -----CTACAGAATGGGAGAAAAATTTTTGCAATCTATCAATCTGACAAAAGAGCTAATACCCA
right GTGAACAGGCAACCTACAGAATGGGAGAAAAATTTTTGCAATCTATCAATCTGACAAAAGAGCTAATACCCA
      1111111111111111111111111111111111111111111111111111111111111111111111111111
  
```

```

left  GAATCTACAAAGAACTTAAACAAAATTTACAAGAAAAGAAAAGAAAACAACCCCATCAAAATGTGGGCAAAGGA
chrom GAATCTACAAAGAACTTAAACAAAATTTACAAGAAAAGAAAAGAAAACAACCCCATCAAAATGTGGGCAAAGGA
right  -----ACCCCATCAAAATGTGGGCAAAGGA
      11111111111111111111111111111111111111111111111111111111111111111111111111
      *****
  
```

```

Other  TATGAAACAGACACTTCTCAAAAAGAAGACATTTA   LTR   LINE   SINE  GCGGGTGGATCATGAGGTCA
Simple Repeat Single Repeat LTR LINE SINE
chrom TATGAAACAGACACTTCTCAAAAAGAAGACATTTA-----TGCAGCCAACAGACATATGAAAAAATGCTCA
right TATGAAACAGACACTTCTCAAAAAGAAGACATTTA-----TGCAGCCAACAGACATATGAAAAAATGCTCA
      *****2222222*2**2*2222*222222**22*222*2***
  
```

```

left  GCGGATCAGACCAATCCCTGGCTACACAGGGGTAAGTCCCGCTCACTATAAATACAAAAAA-TTAGCCGG
chrom TCATTACTGG-CCATCAGAGAAATGCAAATGAAAACCACAATGAGATAACCATCTCACACCAGTTAGAATG
right TCATTACTGG-CCATCAG-----
      22*222*22*2*****22N1NN1NNN1NN11111N1NNNN1NNNN11NN1NNN11N1NN1 1111NNN1
  
```

```

left  GCGGGTGGCGGGCG
chrom GCAA-----
right 11NN2222222222222
  
```

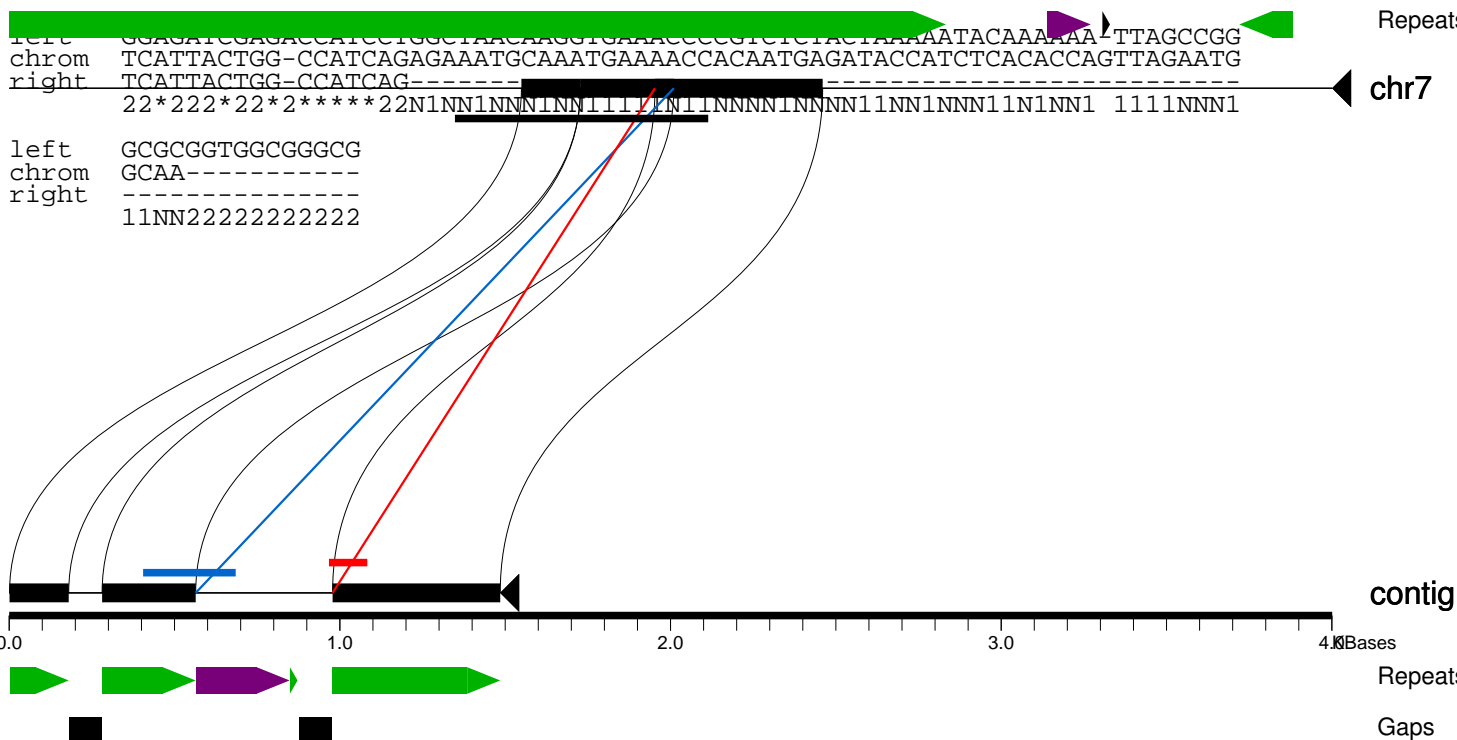

siteID: chr7\_37836654 Scafftig8 + Breakpoint: chr7:37836637

chr7:37836592-37836696

Overlap Length: 15 INS size: 294 Genotyped: Yes

```
left  A-----TCATCAG-----AATTGTTTTTTTTTCCCAAAA--AGGTAATGAGGATTGATTGCTCCCCTCT
chrom A-----TCATCAG-----AATTGTTTTTTTTTCCCAAAA--AGGTAATGAGGATTGATTGCTCCCCTCT
right CCGCCCGCCTCGGCCTCCCAAAAGTGTGGGATTACAGGCGTGAGCCACCGCGCCCGGCCGTGCTCCCCTCT
      11111111*1**1*11111111**1**1*11111**1*11111111**11*11*1*1111*11*****

left  CTTTTTTTTTTTTTTTTTTGAGACGGAGTCTCGCTGTCGCCCAGGCTGGA-GTGCAGTGGCGCAA
chrom CTTTAGAGAACCATT-----ACC-AGT-TCTATATTTACCATAACAATATGTTCAAT-----
right CTTTAGAGAACCATT-----ACC-AGT-TCTATATTTACCATAACAATATGTTCAAT-----
      ***222222222**222222**22***2**22*2*222***22*222*2**2**2*2222222
```

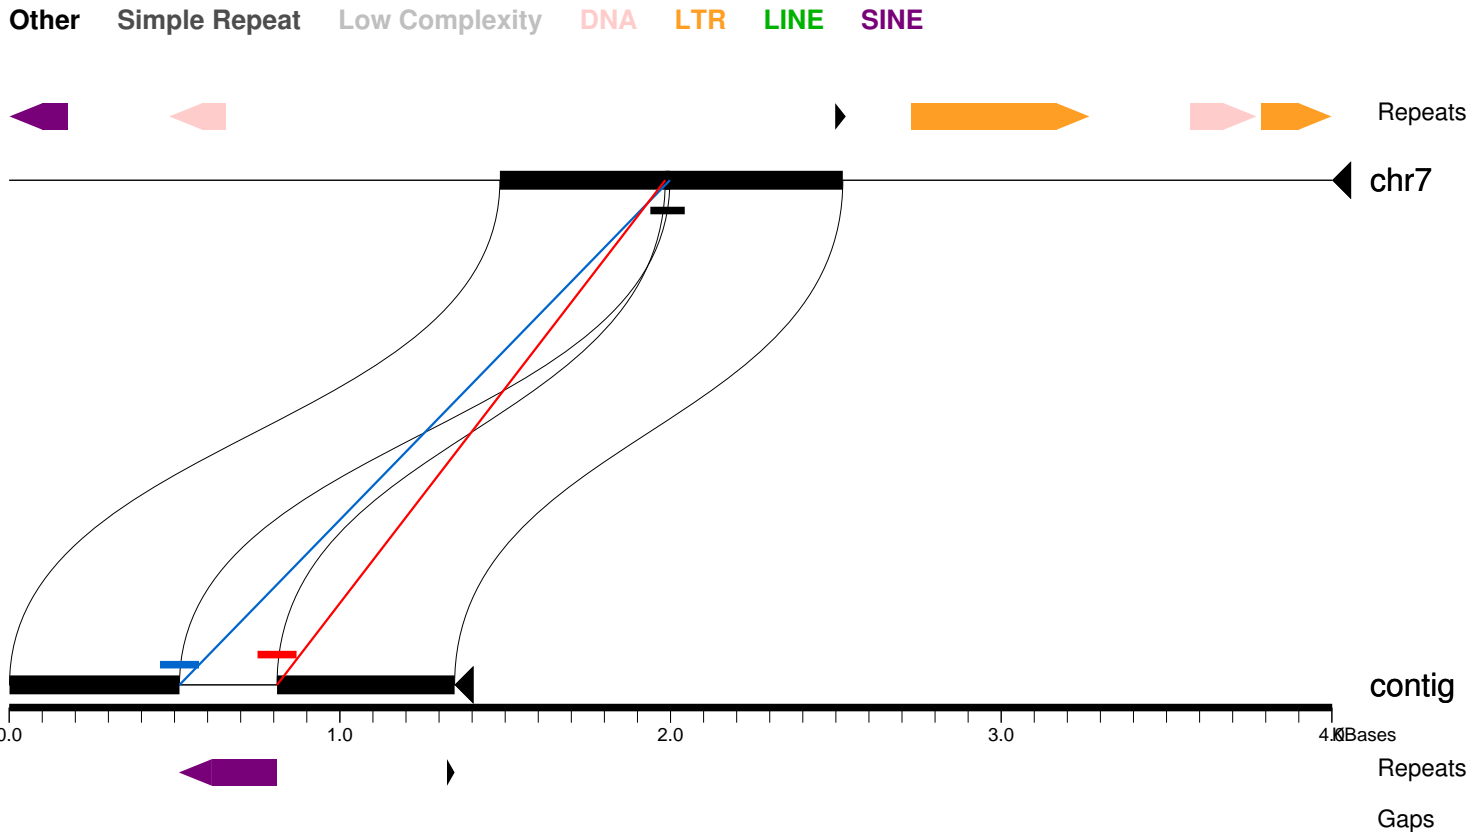



siteID: chr7\_38116214 Scaffold1 + Breakpoint: chr7:38116190

chr7:38116142-38116246

Overlap Length: 12 INS size: 426 Genotyped: No

```
left -----GGTCTTC-----TTGTTGAATTTAACCCTTTA-CCATTATGTAATGCTCTTCTTTGTCT
chrom -----GGTCTTC-----TTGTTGAATTTAACCCTTTA-CCATTATGTAATGCTCTTCTTTGTCT
right CCACCCGCCTCGGCCTCCCAAAGTGCTGGGATTACAGGCGTGAGCCACCGCGCCCGCCCTT---TGTCT
111111111111**1**1*11111*11*1*1***11*11*1*1*1***1111*1111**1***111*****

left TATTTT TTTNNNNNNNNNNNNNNNNNNNNNNNNNNNNNNNNNNNNNNNNNNNNNNNNNNNNNNNNNNNNNNNNNN
chrom TATTTT TAAT-----CTTTGTTGGTTTATAGTCTGTTTTGTGTGAAATTAGGATTGG
right TATTTT TAAT-----CTTTGTTGGTTTATAGTCTGTTTTGTGTGAAATTAGGATTGG
*****22*22222222222222222222222222222222222222222222222222222222222222222222
```

Other Simple Repeat Low Complexity DNA LTR LINE SINE

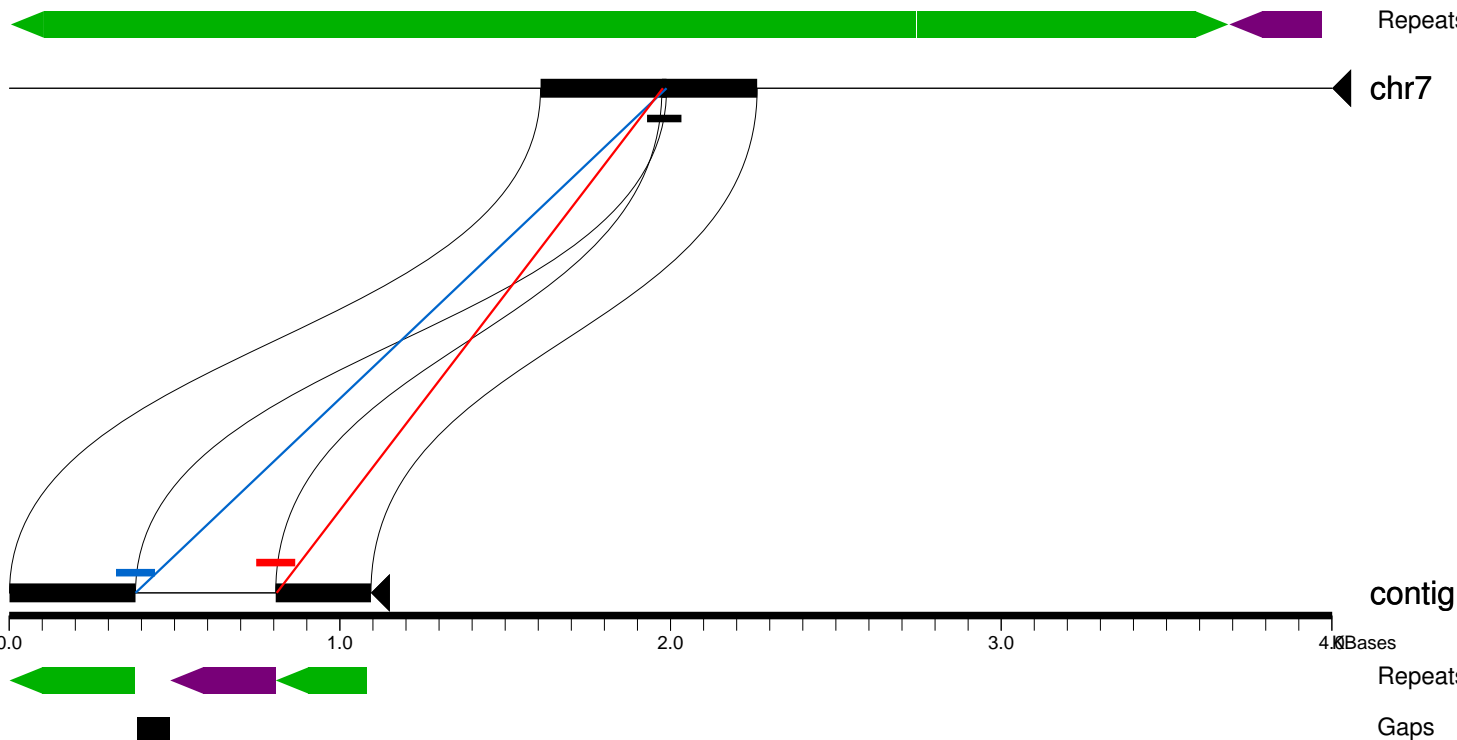



siteID: chr7\_38759709 Scaffitig5 - Breakpoint: chr7:38759700

chr7:38759656-38759759

Overlap Length: 16 INS size: 306 Genotyped: Yes

```
left   TGACTCTTTCC-----CTAAA-----ACCCTCACCTCTCAATTCTCCTCACTTT---AGAAAGCTTC
chrom  TGACTCTTTCC-----CTAAA-----ACCCTCACCTCTCAATTCTCCTCACTTT---AGAAAGCTTC
right  GTCCGCAGTCCGGCCTGGGCGACAGAGCGAGACTC-CGTCTCAAAAAAAAAAAAAAAAAAAAAAAGAAAGCTTC
      111*1*11***11111111*1*1*11111*11***1*1*****11111111*1111111******
left   ACTCTTGGCCGGGCGCGGTGGCTCACGCCTGTAATCCCAGCACTTTGGGAGGCCGAGGCGGGTGG
chrom  ACTCTTAATC---CTCTATGGA ACTCTAGGCTAATTCCTGC-CTATCTAAAGAT-----
right  ACTCTTAATC---CTCTATGGA ACTCTAGGCTAATTCCTGC-CTATCTAAAGAT-----
      *****222*222*2*22***22*2*22222*****2**2**2**2*222*2*2222222222222
```

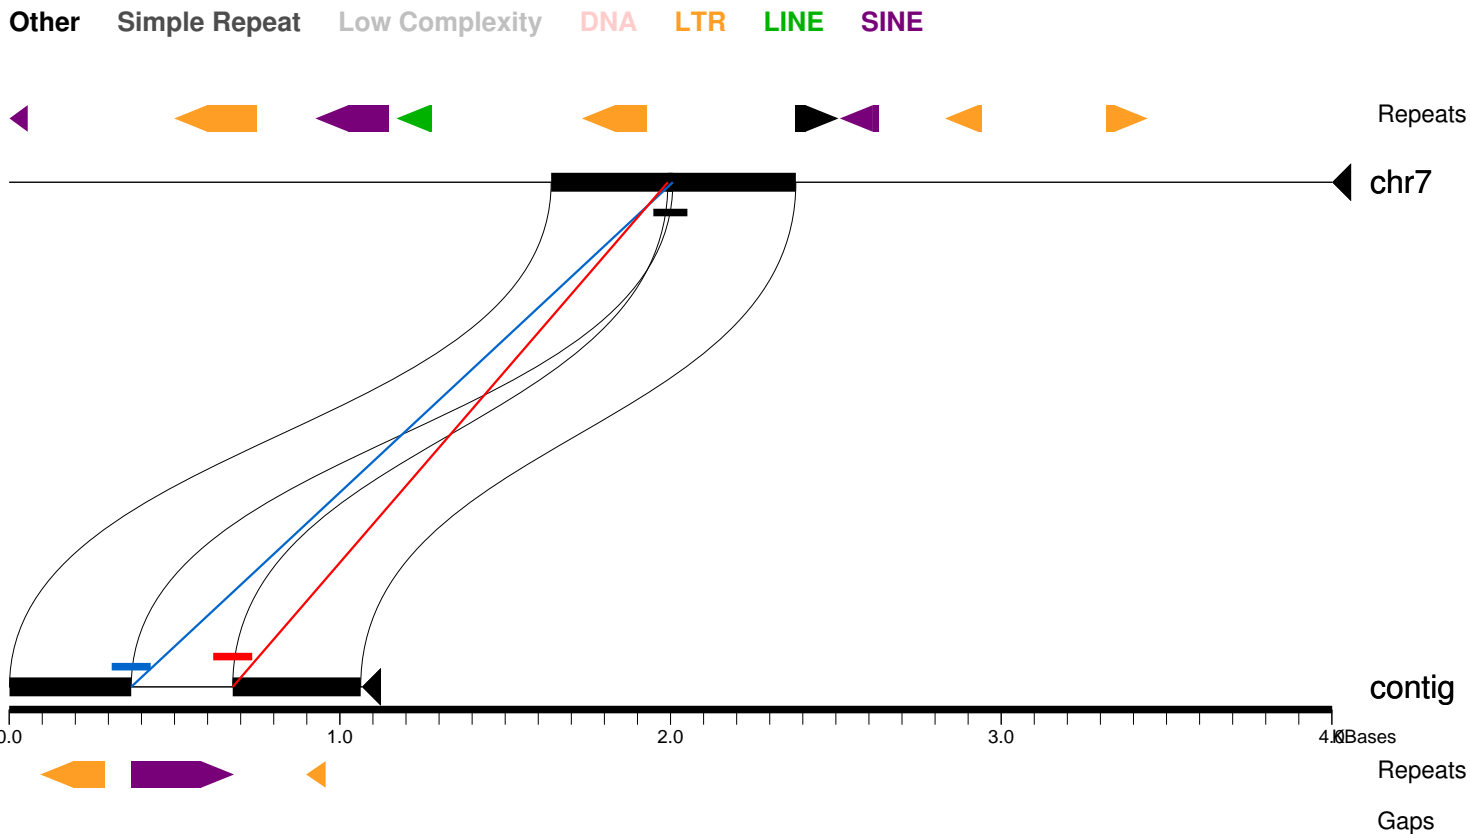

siteID: chr7\_39749700 Scafftig2 - Breakpoint: chr7:39749694  
chr7:39749650-39749753  
Overlap Length: 16 INS size: 430 Genotyped: No

```
left AA----CATCAGT-----AAAGAGGCAGCATTCCTTTGGC-AGCC-CAGAGCTTT-----CCTCCCATATT
chrom AA----CATCAGT-----AAAGAGGCAGCATTCCTTTGGC-AGCC-CAGAGCTTT-----CCTCCCATATT
right CACCCGCCTCGGCCTCCCAAAGTGCTGGGATTACAGGCGTGAGCCACCGCGCCCGGCCACCTCCCATATT
1*11111*1**1*111111*****1*111*1***1*1111*11*****1*1*1**1111111*****
```

  

```
left TTTT TTTNNNNNNNNNNNNNNNNNNNNNNNNNNNNNNNNNNNNNNNNNNNNNNNNNNNNNNNNNNNNNN
chrom TTTT-----AACTGCAAAAATCATTTTCAGTCCTCTACTGTAGCAGTTCTGCATG
right TTTT-----AACTGCAAAAATCATTTTCAGTCCTCTACTGTAGCAGTTCTGCATG
*** * 2222222222222222222222222222222222222222222222222222222222222222222222
```

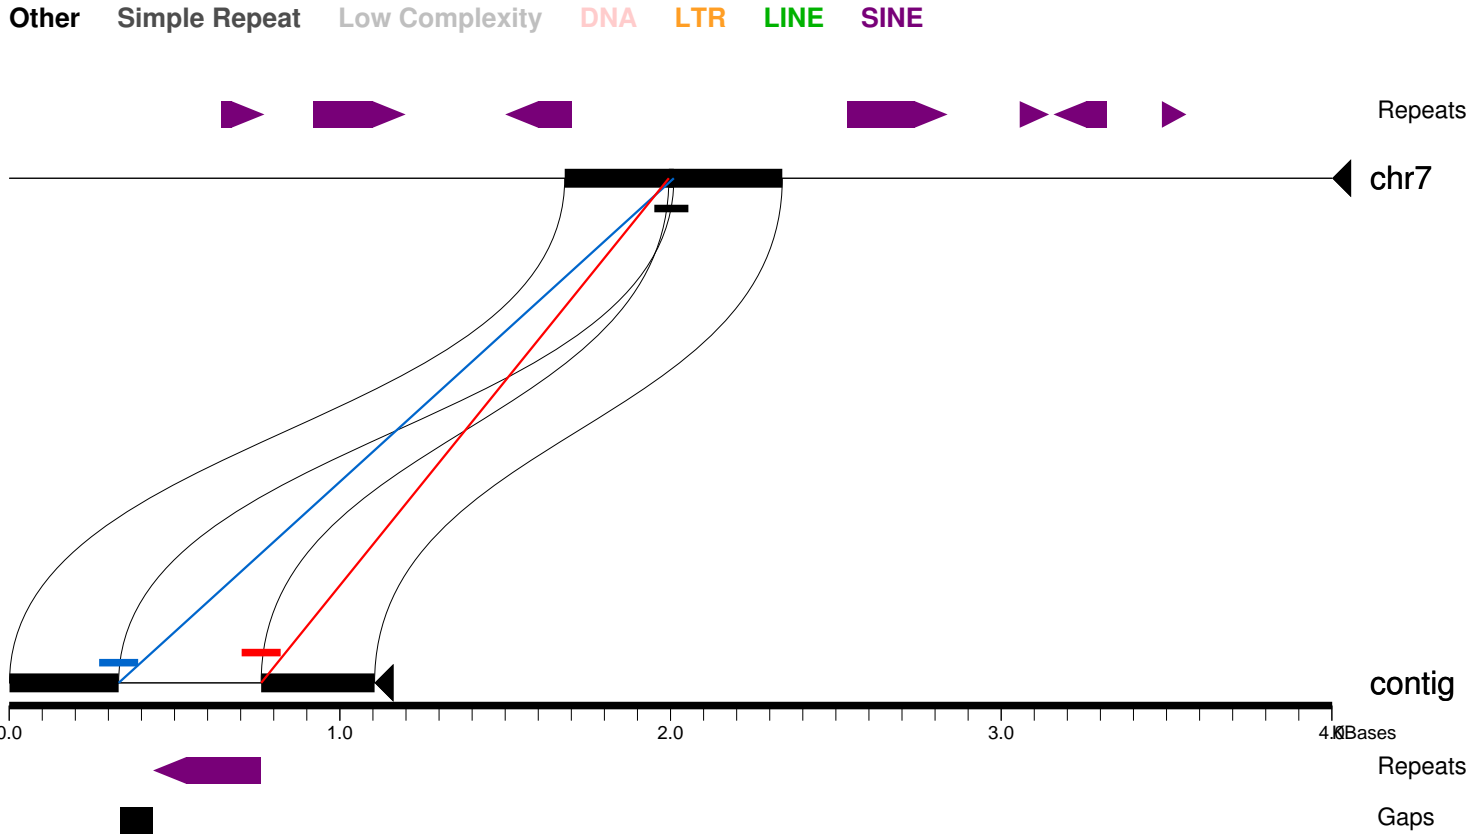

siteID: chr7\_42647659 Scafftig1 + Breakpoint: chr7:42647644

chr7:42647601-42647703

Overlap Length: 17 INS size: 306 Genotyped: Yes

```
left  T--GACAGTGTCTAACAGGAGACCTCCCTGGATAA-----AGCTGCAACA-----CCAAAAGTCTT
chrom T--GACAGTGTCTAACAGGAGACCTCCCTGGATAA-----AGCTGCAACA-----C CAAAAGTCTT
right TCCGCCCGCCTCGGCCTCCCAAAGTGCTGGGATTACAGGCGTGAGCCACCGCGCCCGGC C CAAAAGTCTT
      *11*1*1*11*111*11111*11*1*11****1*11111111***11*11*1111111* C CAAAAGTCTT
```

```
left  TATCTTTTTTTTTTTTTTTTTTTTTTTTTTTTTTTTTTTTGGAGACGGAGTCTCGCTCTGTGCGCCAGGCTGGA
chrom TATCTTAAGCATAAGTATGAACT-----AGAAATAAACTCTCCCCATCCTCCT-----A
right TATCTTAAGCATAAGTATGAACT-----AGAAATAAACTCTCCCCATCCTCCT-----A
      *****22222*222*2*2222*2222222222***222*22***2*2*22**22**2222222*
```

Other Simple Repeat Low Complexity DNA LTR LINE SINE

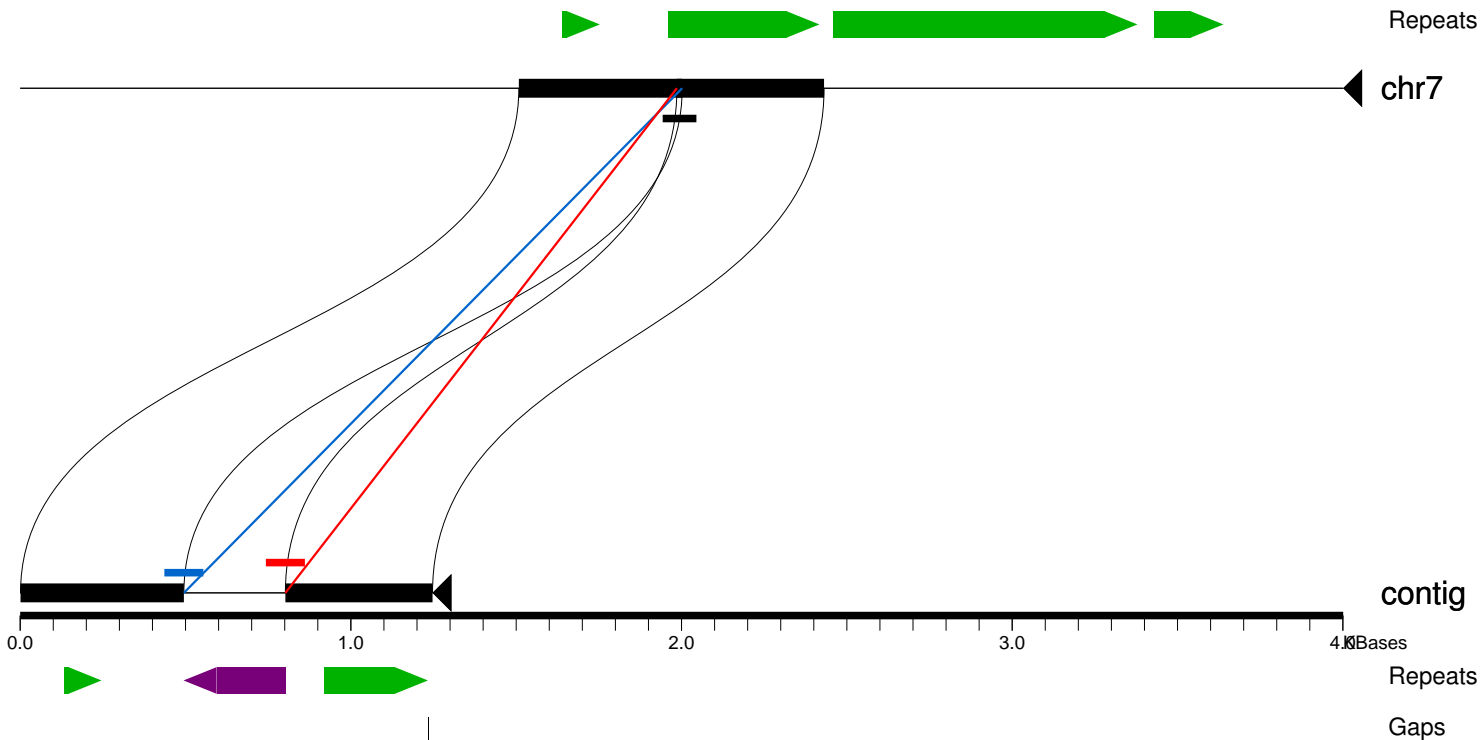

siteID: chr7\_45329421 Scaffitg2 - Breakpoint: chr7:45329396

chr7:45329250-45329605

Overlap Length: 19 INS size: 159 Genotyped: Yes

```
left -----
chrom -TAAGCCAAGTATAATAAAGCAAACCAATCCTACCATGATTTGTCTTTAGCAAAAAATGGAAAACTGGAGA
right CTCGGCTCACT-----GCAAGCTCCGCCTCCCGG-----
12NN22NN2N2          2222N2NNNN222N22NN2
```

```
left -----ACTCTAGTCTTGTCTAATGTTTTTCAGTTTTTATTATTT
chrom GAGAAAAATTATGTTTTCAAAAACTATAGTACACTCTAGTCTTGTCTAATGTTTTTCAGTTTTTATTATTT
right -----TTCA-----CGCCATTCTCCTGCCT-----CAGC-----
          2222          21*11*11**1**1**1111111111**111111111111
```

```
left CTACAGTTCTGGCAGAATTTTTTCTT--CT-----TTTCT-----TTTCTTTTTTTTTTTTTTTTTTT
chrom CTACAGTTCTGGCAGAATTTTTTCTTGGCTACAAGTCTTCAAAAATAATGTTTTTCATTATTTTTTCTTTTTT
right CTCC--TCTGGCAGAATTTTTTCTTGGCTACAAGTCTTCAAAAATAATGTTTTTCATTATTTTTTCTTTTTT
**1*111******22**22222*2**22222222*****2*2*****2*****
```

```
left TT-----TTTTTT-----TTTTTTTTTGAGACGGAGTCTC-----GCTCTG---TCGCCAGGCCGG
chrom TTCCTGCTTTTTTCCCATTTTTTCCCTAATTTGGAGTCACTGAAAACTAAGCTGTGCTTTCTTAAAAACCCTG
right TTCCTGCTTTTTTCCCATTTTTTCCCTAATTTGGAGTCACTGAAAACTA-----
**22222*****2222*****22*2*222*****2*222222222 111N11 11NNNN1NN1N1
```

```
left ---ACTGCGG-----ACTG-----CAGTGGCGCAAT-----CT-
chrom CCAACTGAAGCCAAACAACCTTAAATTAAAAAAAAAAAAAAAAAACAGCAACCCATTTACATACATAAGCCACTT
right -----
          1111NN1          111N          111NNN1N1N1          11
```

```
left -----CG
chrom TCATACC
right -----
          1N
```

Other Simple Repeat Low Complexity DNA LTR LINE SINE

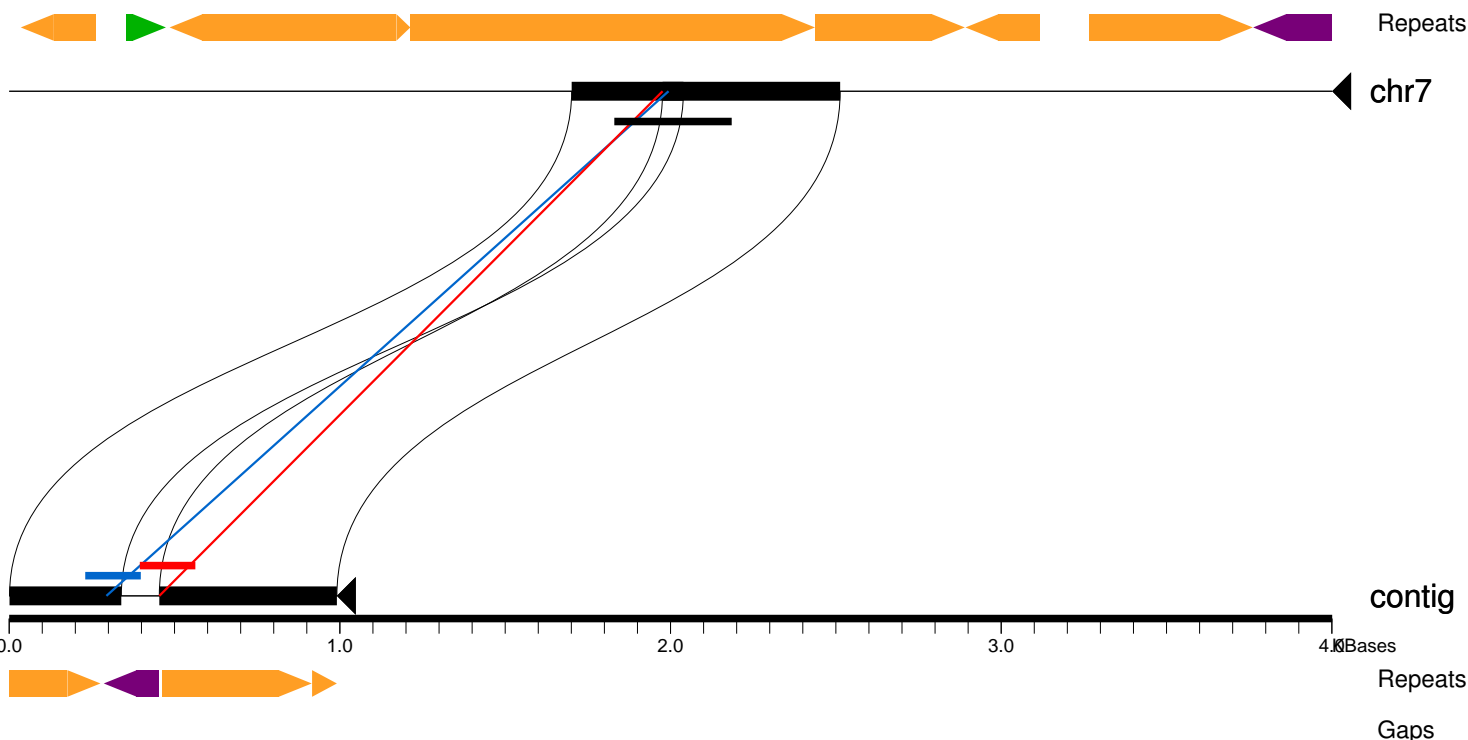



siteID: chr7\_47551084 Scaffitg2 + Breakpoint: chr7:47551077

chr7:47550917-47551249

Overlap Length: 13 INS size: 324 Genotyped: Yes

left -----ACAGAATCACAAAAAAAAAATGCACCTCCTC  
chrom TGCATGCAAGGGTAACCAGCCTCTTGATTAAGGCTGCATAACAGAATCACAAAAAAAAAATGCACCTCCTC  
right AATTTTTTT---GTA-----TTTTTAGTAGAG-----ACGGGGTTTCACCGTGGTCTCGATCTCCTG  
NNNN2NNN 222 2N22N2N22NN2 \*\*1\*11\*11\*\*11111111\*11\*1\*\*\*\*\*1

left TCATTTTGTGTTTTGAAACATAGTTATTTTTTTATTAAGCTTATGTTTCATTTTAAACATGTAATTGGTTCA  
chrom TCATTTTGTGTTTTGAAACATAGTTATTTTTTTATTAAGCTTATGTTTCATTTTAAACATGTAATTGGTTCA  
right ACCTCGTGATCCGCCCG--CCTCGGCCTCCCAAAGT--GCTGGGATT-----ACAGG-----CG  
1\*1\*11\*\*1\*111111111\*1\*1\*111\*11111\*1\*11\*\*\*1111\*11111111\*\*\*1\*111111111\*1

left TTA-CCATTGCTTTTAACTGACTTAAATATTTTATTTTATTTTTTTTTTTGTTTGTGTTTTGTTTTGTTTT  
chrom TTA-CCATTGCTTTTAACTGACTTAAATATTTTAAAT-ACTCATCAGTTTCCCATTTCTAATAGGGTAAA  
right TGAGCCACCGCGC---CCGGCTTAAATATTTTAAAT-ACTCATCAGTTTCCCATTTCTAATAGGGTAAA  
\*1\*1\*\*\*11\*\*1111111\*1\*1\*\*\*\*\*22\*2\*2\*22\*22\*\*2222\*\*2\*22\*22\*2\*22

left TTTTTTTTGTTTTTTTTTTTTTTTGAGACG-GAGTCTCGTTCTGTGCGCCAGG-CGGGAGTGCTGTG-GCGCG  
chrom TCGTGATGAATACAAAACCACACTGACAAGAGCCCTTTAGGGTCTTCTAGGACCTTAGCAGTGGGTGCCCG  
right TCGTGATGAATACAAAACCACACTGACAGGAGCCCTTTAGGGTCTTCTAGGACCTTAGCAGTGGGTGCCCG  
\*22\*22\*222\*222222222222\*\*\*2N\*\*\*2\*222\*222\*\*\*22\*2\*\*\*2\*222\*\*222\*\*2\*2\*\*2\*\*

left ATCTCCGCTC---ACTGCAAGCTCCG--CCTTCTGGGTTACGCCATTCT-----  
chrom AGACCCGCAGCGCGAGGGCAA-CCCCGTTTCATTCTCCTTGCCCTGAGGCTCTCAGAA  
right AGACCCGCAGCGCGAGGGCAA-CCCCGTTTCATTCTCCTTGCCCTG-----  
\*222\*\*\*222222\*22\*\*\*2\*2\*\*\*22\*2\*\*\*222\*2\*22\*NNNN111

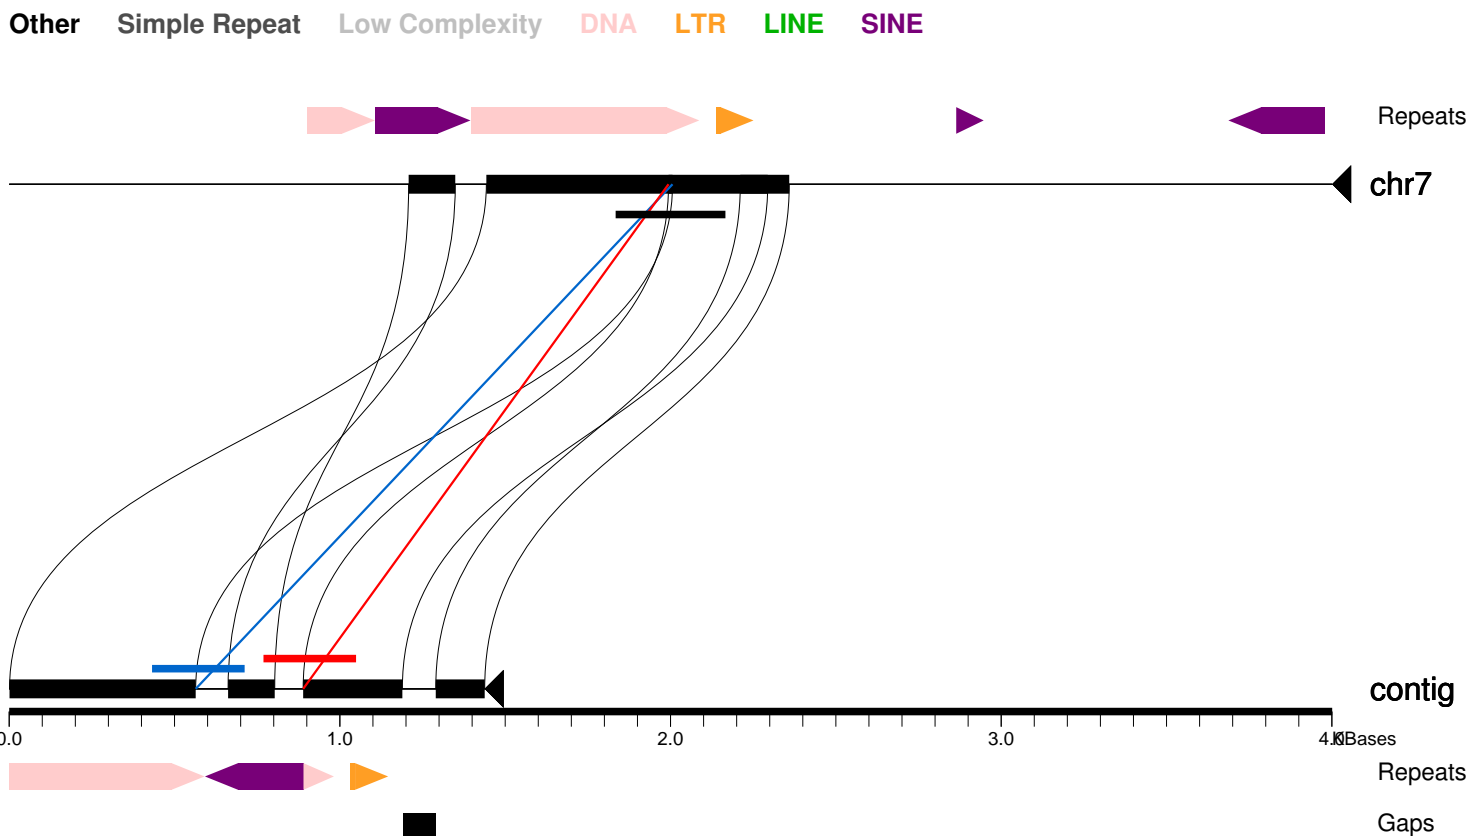







siteID: chr7\_52403908 Scaffitig6 + Breakpoint: chr7:52403910

chr7:52403750-52404076

Overlap Length: 7 INS size: 261 Genotyped: Yes

```
left -----GTCAGTCCAAGTGAAAGTGAAGAGAGGCTGGGATGAAGGGTGCAAAGGATAGTAAAGAAAAGCA
chrom TGTCAGAGTCAGTCCAAGTGAAAGTGAAGAGAGGCTGGGATGAAGGGTGCAAAGGATAGTAAAGAAAAGCA
right ---CAGGCGCGCGCCACC-----ATGCCCGCTAATTTTTGTATTTT-TAGTAGAGACGGGG
      222N11*111***1111111111111111*1**11**1*1*1111**1*11111*****1***11*11
```

```
left TCTTTGAGATCTAGAACAGAATAATGGGTTGTGGAGGGAGGTATTGAGGATAGGAAAAGTATATGGGTTTG
chrom TCTTTGAGATCTAGAACAGAATAATGGGTTGTGGAGGGAGGTATTGAGGATAGGAAAAGTATATGGGTTTG
right TTTC-----ACCGTGTTAGCCAGGATGGTCTCGATCTCCTGACCTCGT---GATCCG
      *1*111111111111111111111111*11*1***1111***11***1*1**111111**11111*111*1*11*
```

```
left GCACCATGGGGTGGATAGGCAAAACAATTTTTTTTTTTTTTTTTTTGAGGCGGAGTTTCGCT-----
chrom GCACCATGGGGTGGATAGGC AAAACA CTTTATTGATAAAGGTGCAGATCCTGAAATAACCTGTAAGACTT
right CCCGCCTCGGCCTCCCAAA-AAAACAACCTTTATTGATAAAGGTGCAGATCCTGAAATAACCTGTAAGACTT
      1*11*1*1**111111*111*****2***2**22*2222*222**22*2**22*222**22222222
```

```
left --CTGTTGCCAGGCTGG-----AGTGCAGTGGC---GCGA-TCTCGACTCACTGCAAGCTCC-----
chrom GTCTGGTTTTTTAGACAGGTAAAAATAGGGGAATTGTAAGGAGAGTTTATAGGCTTTAGAAGCCCATGTTGT
right GTCTGGTTTTTTAGACAGGTAAAAATAGGGGAATTGTAAGGAGAGTTTATAGGCTTTAGAAGCCCATGTTGT
      22***2*2222**2*2**222222**2*2*2*2*2222*2**2*2*22*22*22*22***2*22222222
```

```
left -GCC-----TCCCGGGTTTACGCCATTCTCCTGCCT-CAGCC-
chrom AGCAGGTGAGTGATAATGGGCTTTAACCTTTTTAAAGCCTGCTGTGG
right AGCAGGTGAGTGATAATGGGCTTTAACCTTTTTAAAGCCT-----
      2*2222222222*222***2**222**2**2*222*** 1N1NN
```

Other Simple Repeat Low Complexity DNA LTR LINE SINE

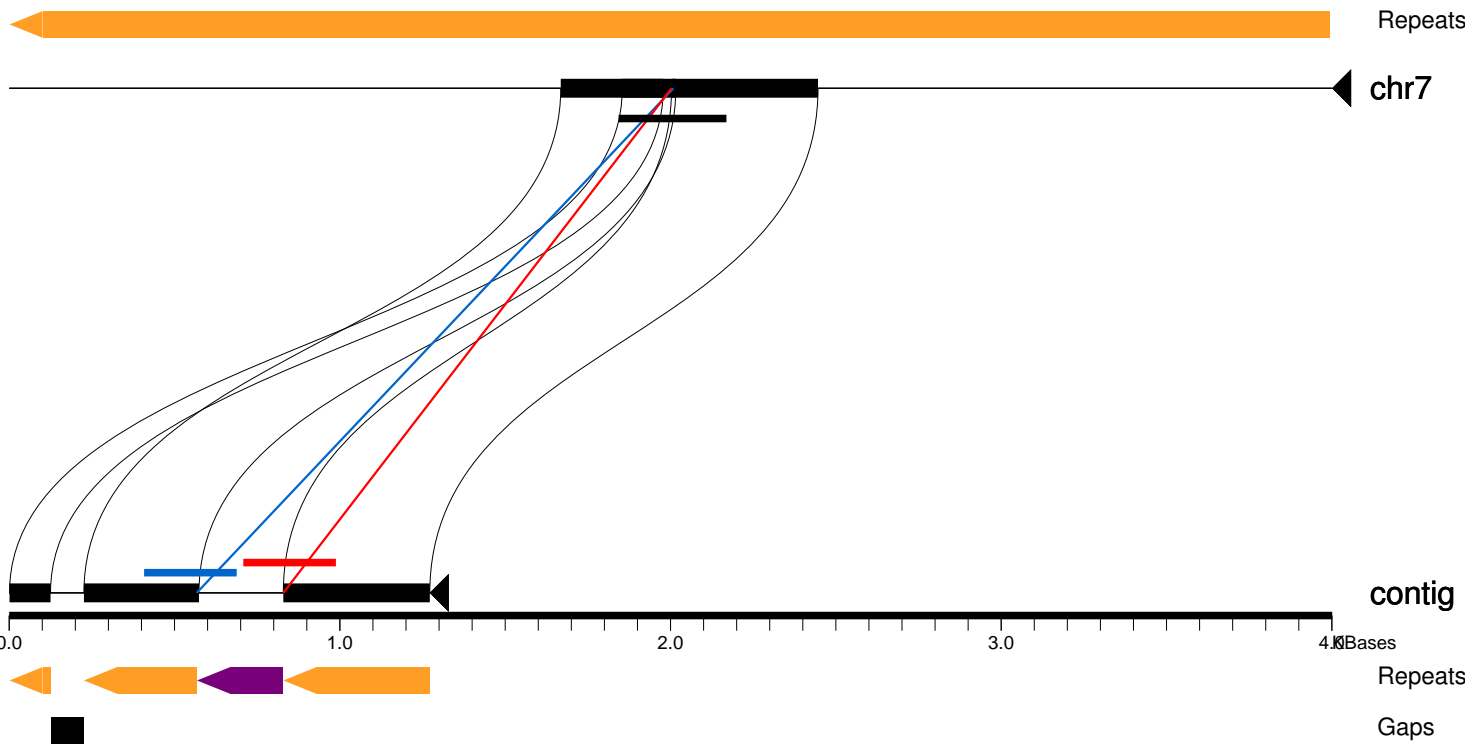



siteID: chr7\_53358278 Scaffitig4 - Breakpoint: chr7:53358285

chr7:53358236-53358344

Overlap Length: 11 INS size: 292 Genotyped: Yes

```
left   TACACATAGGTGAGT--ATTTTTCCTGCTTTAAAAAATTATTTTGTTTTT-----AAAAAATT
chrom  TACACATAGGTGAGT--ATTTTTCCTGCTTTAAAAAATTATTTTGTTTTT-----AAAAAATT
right  GAT---TGCGCCACTGCACTCCAGCCTGGGCGACAGCGAGACTCTGTCTCAAAAAAAAAAAAAA*AAAAAATT
      1*1111*11*11*1*11*1*111*****1111*1*1111111*1***1*1111111111111******
```

  

```
left   GACGGCCGGGCGCGGTGGCTCACGCCTGTAATCCCAGCACTTTGGGAGGCCGAGGCGGGCGG
chrom  GACAATAAAATTGTATG---TACTTATGTACAACATGATGTTTTCAA-----GTGTATAT
right  GACAATAAAATTGTATG---TACTTATGTACAACATGATGTTTTCAA-----GTGTATAT
      **222222222222**2222**222***222*22*222***222*2222222*2*22222
```

Other Simple Repeat Low Complexity DNA LTR LINE SINE

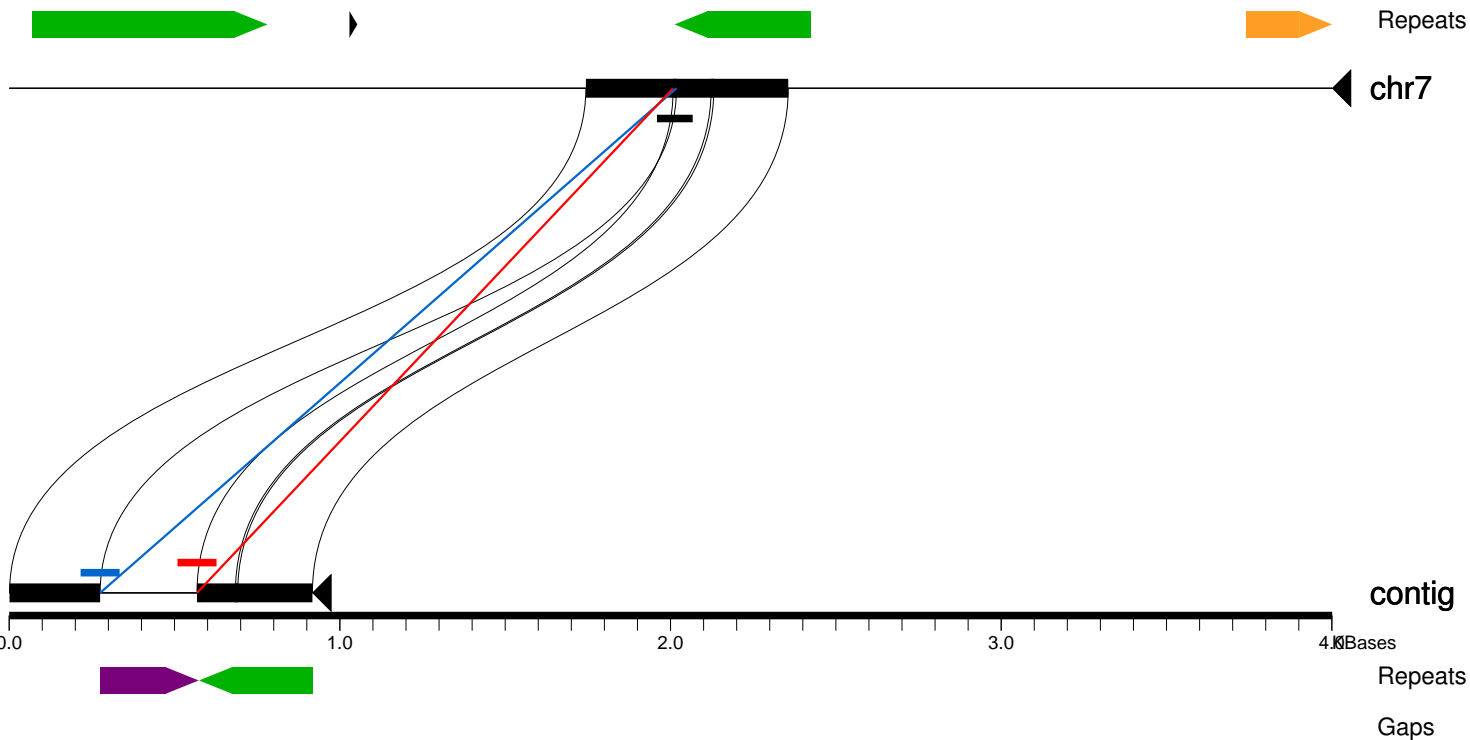

siteID: chr7\_56244912 Scaffitg13 - Breakpoint: chr7:56244904

chr7:56244744-56245078

Overlap Length: 15 INS size: 307 Genotyped: Yes

```
left -----CTCCCACATTTGGTGAGGGCCAGCCTTCTTTACTCAGTCTACTGATTCAAATGCT
chrom G-GAATGGATGGTGTCTCCACATTTGGTGAGGGCCAGCCTTCTTTACTCAGTCTACTGATTCAAATGCT
right GAGAATGGCGTGAATCC-----GGGAAGCGGAGCTTGC---AGTGAGCCGA--GATTGC---GCC
21222222NNN2NN22*1111111111*1**1*111**1*1*111*1*1**1*1*11****11111**1
```

```
left AATCTCTTCCAGAAACATCTTCACAGATGCACCTGGAAATAATGTTTTACCAGCCATCTGGGCATCCCTT
chrom AATCTCTTCCAGAAACATCTTCACAGATGCACCTGGAAATAATGTTTTACCAGCCATCTGGGCATCCCTT
right ACTG-----CAG-----TCCGCAGTCCGACCTGGGC-----GACAGAGCGAGACTCCGT
*1*1111111**11111111*1*1**1111*****111111111111111111*1**1111*11*11**1*
```

```
left ACCCCAGTCAAGTTGACACATAAAAGTAATCATCACGGCCG-----GGCGCGG--TGGCTCACGCC----
chrom ACCCCAGTCAAGTTGACACATAAAAGTAATCATCACATTGGTATATGAAGAGGATTAAGTCACTCAGTTT
right CTCAAAAAAAAAAAAAAAAAAAAAA*AAAGTAATCATCACATTTGGTATATGAAGAGGATTAAGTCACTCAGTTT
11*11*111**1111*1*1*1*1*****2222*22222*22*2**22*222****2*22222
```

```
left -----TGTAATCCAGCACTTTTGGG-----AGGCCGAGGCGGGTGGATCATGAGGTCAGGAGATC
chrom TGAATAGGTTTGTGAGTGCTGAACTTTCTTTGTCAAGGCTGATTCGAGTTCATAATGA--TCTGCTCACT
right TGAATAGGTTTGTGAGTGCTGAACTTTCTTTGTCAAGGCTGATTCGAGTTCATAATGA--TCTGCTCACT
2222222222***2*222*2*2*****22222222****2**22**2**22**2****22**2*222*22
```

```
left GAGACCATCCTGGC----TAACAAG-----TGAAACCCCGTCTCTGCTAA-----A
chrom GTGTCCCTGGAGAAGAAGTAACAGGGGAAATGATGCTCATGGACTGTCATGGTTCGTTA
right GTGTCCCTGGAGAAGAAGTAACAGGGGAAATGATGCTCATGGACTGT-----
*2*2**2*222*222222****2**2222**22*2*22222***2N1N 1
```

Other Simple Repeat Low Complexity DNA LTR LINE SINE

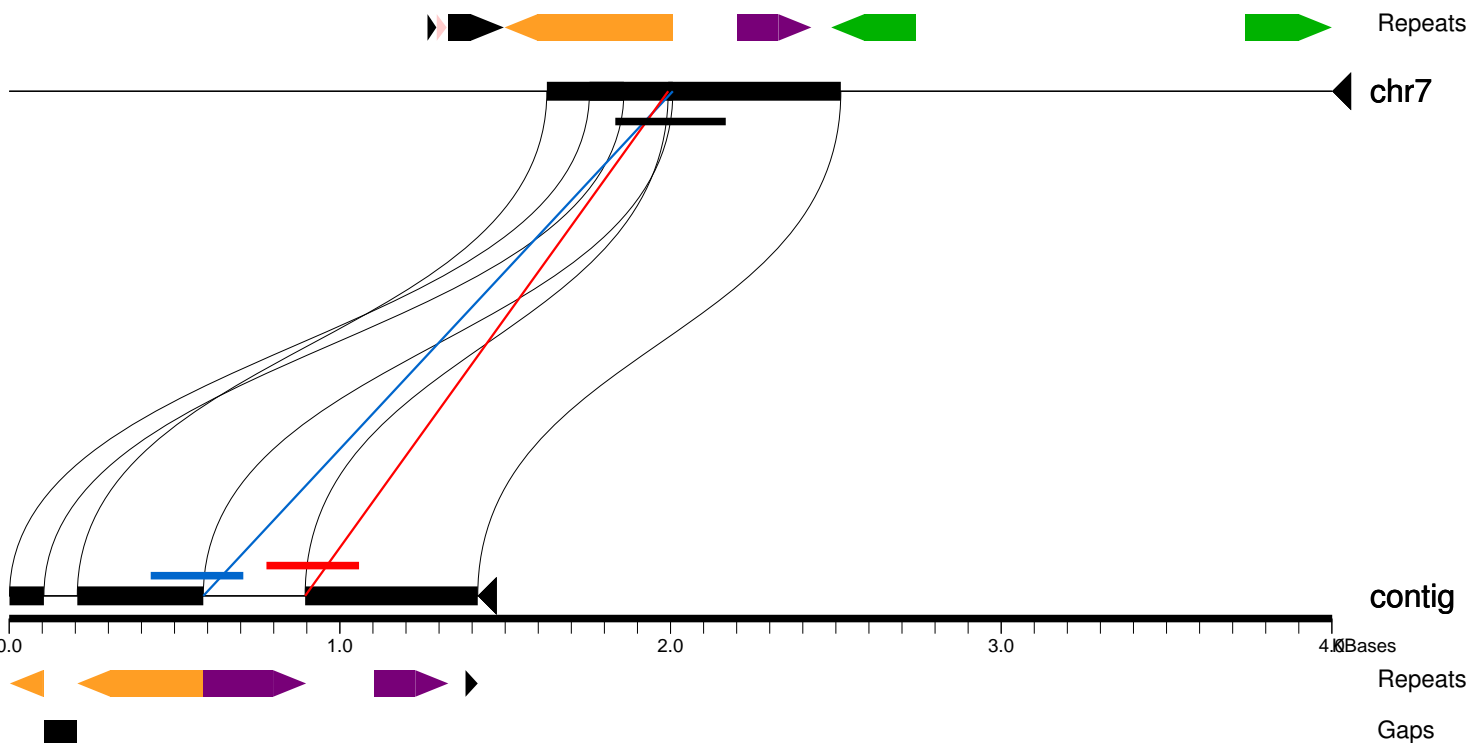









siteID: chr7\_77737216 Scaffitig6 + Breakpoint: chr7:77737193

chr7:77737170-77737249

Overlap Length: 14 INS size: 314 Genotyped: Yes

```

left   T-----CTCTGATTTTATTATTG-----GGTCTTCCCTC
chrom  T-----CTCTGATTTTATTATTG-----GGTCTTCCCTC
right  TGATCCGCCCGCCTCGGCCTCCCAAAGTGCTGGGATTACAGGCGTGAGCCACCGCGCCCGGCCTTCCCTC
       *11111111111111111111111111111111**11**1111*11*111111111111**1*****
left   TTTCTTTT-----TGAGACGGAGTCTTGCTCTGTCGCCCAGGCT
chrom  TTTCTTAGTATTGATTTTGTTTATCTTT-----CAAAAAACCAAGCT
right  TTTCTTAGTATTGATTTTGTTTATCTTT-----CAAAAAACCAAGCT
       *****22*2**22*****2***2*2*****22222222222222222222222222222222*222222***2***
left   GGAGTGCAGTGGCGGGAT
chrom  ----TTCATT-----
right  ----TTCATT-----
       2222*2**2*22222222

```

Other Simple Repeat Low Complexity DNA LTR LINE SINE

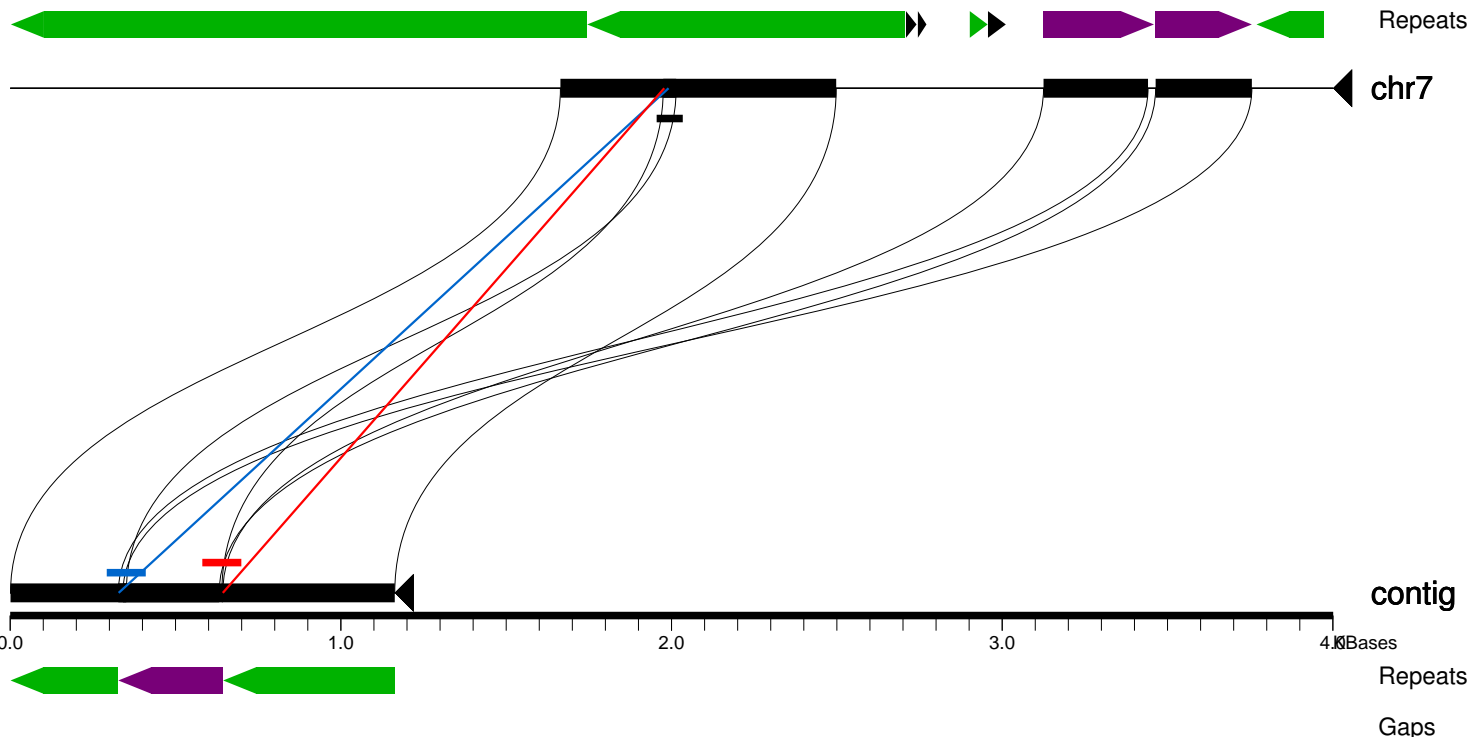





siteID: chr7\_85013804 Scaffitg3 - Breakpoint: chr7:85013789

chr7:85013629-85013962

Overlap Length: 14 INS size: 296 Genotyped: Yes

```
left -----CTTTTCGATAATAGAATAAGTCTAAGACAGTGAGTCCCATAAGATATTGGATTACA
chrom TTCGGATTTTCATACTTTTCGATAATAGAATAAGTCTAAGACAGTGAGTCCCATAAGATATTGGATTACA
right G-CTGA-----GGCAGGAGAATG-GCGTGAACCCGGGAGGCG-----GAGCTTGCAGTG--
N 2N22 111111*11*11*****11*11*1*11*1*1***1*111111**11***1*1*111
```

```
left AATCTTAGAATCACATTCCATGAGTACATTTTCTCCCTCAATAAAAATTCATCAATCTATATTAAACCA
chrom AATCTTAGAATCACATTCCATGAGTACATTTTCTCCCTCAATAAAAATTCATCAATCTATATTAAACCA
right -AGCCGAGA-----TTGCGCCACTGCACT--CCAGCCTGGGCGACAGAGCGAGACTCCGTCTCAAAAAA
1*1*11***111111**1*111*1*1**1*11**11***111111*1*111*111*1**11*1*1***11*
```

```
left TTAAGACTCAAATGGTTTAAAAAATGGCAAGTAGGCGG----GGCGCGGTGGCTCAC--GCCTGTAATC
chrom TTAAGACTCAAATGGTTTAAATAAATGGCAAGTAAATAAAAAGAGTCATAGGGTTTTATTTGGACTTTAAGT
right AAAAAA---AAA-----AAAATTTGGCAAGTAAATAAAAAGAGTCATAGGGTTTTATTTGGACTTTAAGT
11**1*111***111111111*****22222222*2*222*2*22*2*222*2**2***22
```

```
left CCA-GCACTTTGGGAGGCCGAGGCCGGCGGATCACGAGGTCAGGAGAT-----CGAGACCAT-CCCGGC
chrom CCACGCATTCTTAAATTTATACCATGGGCAAACATAAAATTTACAATGTATCTGTCTTAACTTTGCCCCCTA
right CCACGCATTCTTAAATTTATACCATGGGCAAACATAAAATTTACAATGTATGTGTCTTAACTTTGCCCCCTA
***2***2*22222*22222*2222**222*2**22*22*2*22*22*22N222*222**22*2***222
```

```
left TAACACG---GTGAAACCCCGTCTCTA-----CTAAA-----
chrom TATTTTGTGAAGTGAAAAACATTTCAATTTTCAGGAGCTAAGCAATTACAGTGTCC
right TATTTTGTGAAGTGAAAAACATTTCAATTTTCAGGAGCTAAGCAAT-----
**2222*2222*****2*222*22*22222222****22222
```

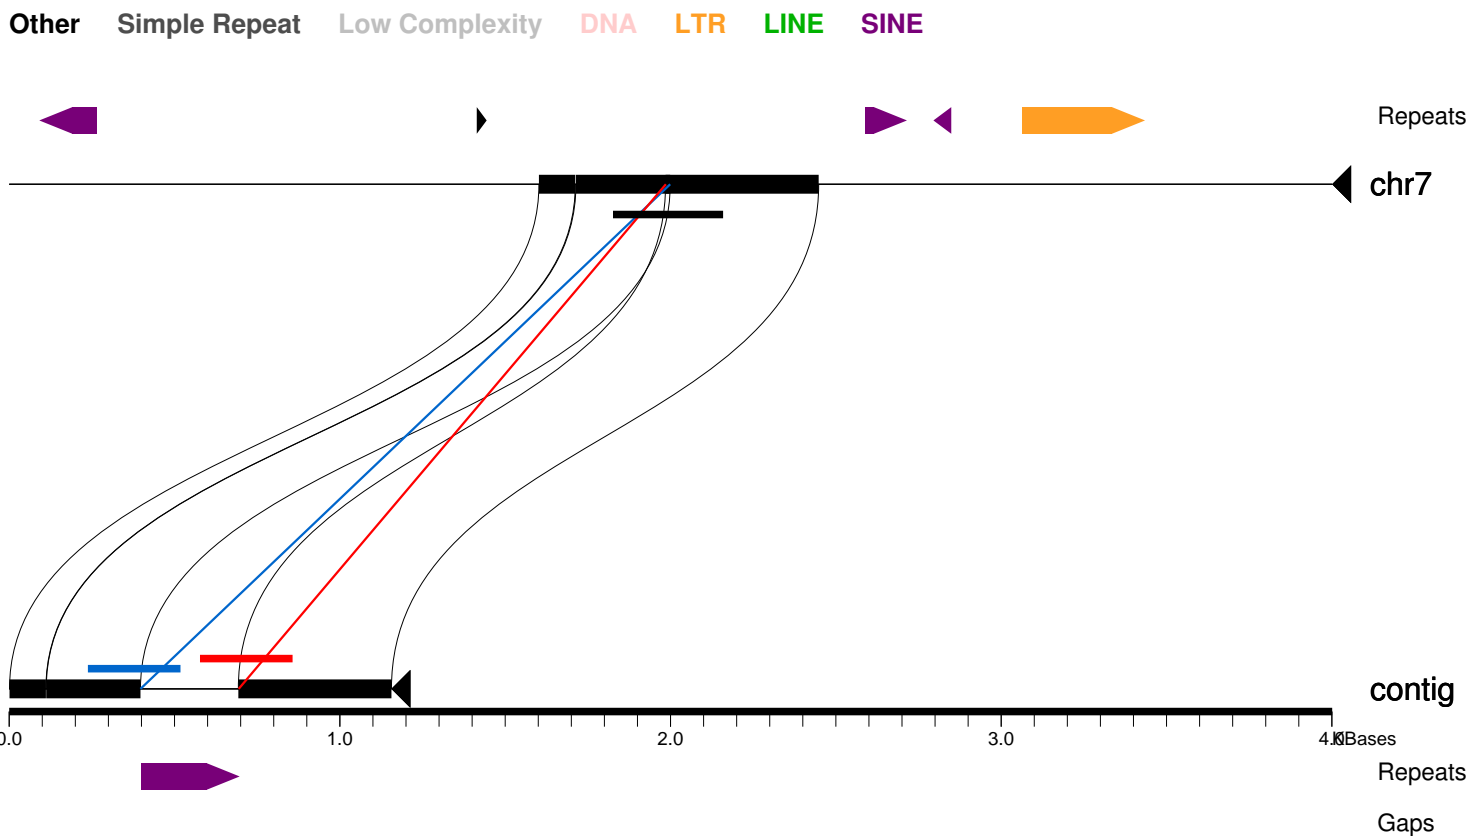

siteID: chr7\_8517303 Scafftig1 - Breakpoint: chr7:8517275

chr7:8517231-8517334

Overlap Length: 13 INS size: 314 Genotyped: Yes

```
left CT-----CTTAATGTAATTCTAGATTTAATGGCA----TTTGGTGCTTGGGTCAGACCAGTGA
chrom CT-----CTTAACGTAATTCTAGATTTAATGGCA----CTTGGTGCTTGGGTCAGACCAGTGA
right CCGCCCGCCTCGGCCTCCCAAAGTGCTGGGATTACAGGCGTGAGCCACAGCGCCCGGCCAGACCAGTGA
      *11111111111111*1*11211*1*1**1*11***11***1111121111*1**11**11*****
```

```
left TTTTTTTTTTTTTTTTTTTTTTTTTTTTTTTTTTTTTTTTGGAGACGGAGTCTCGCTCTGTCGCCCAGGC-
chrom TTCTTAATAGGAATCACCTCCTGCTGC-----AGGGATGGTG-----CTGGGGG--AGGAT
right TTCTTAATAGGAATCACCTCCTGCTGC-----AGGGATGGTG-----CTGGGGG--AGGAT
      **2**22*22222*2222*22*22*2222222222*2**2**2*2222222***22*222***22
```

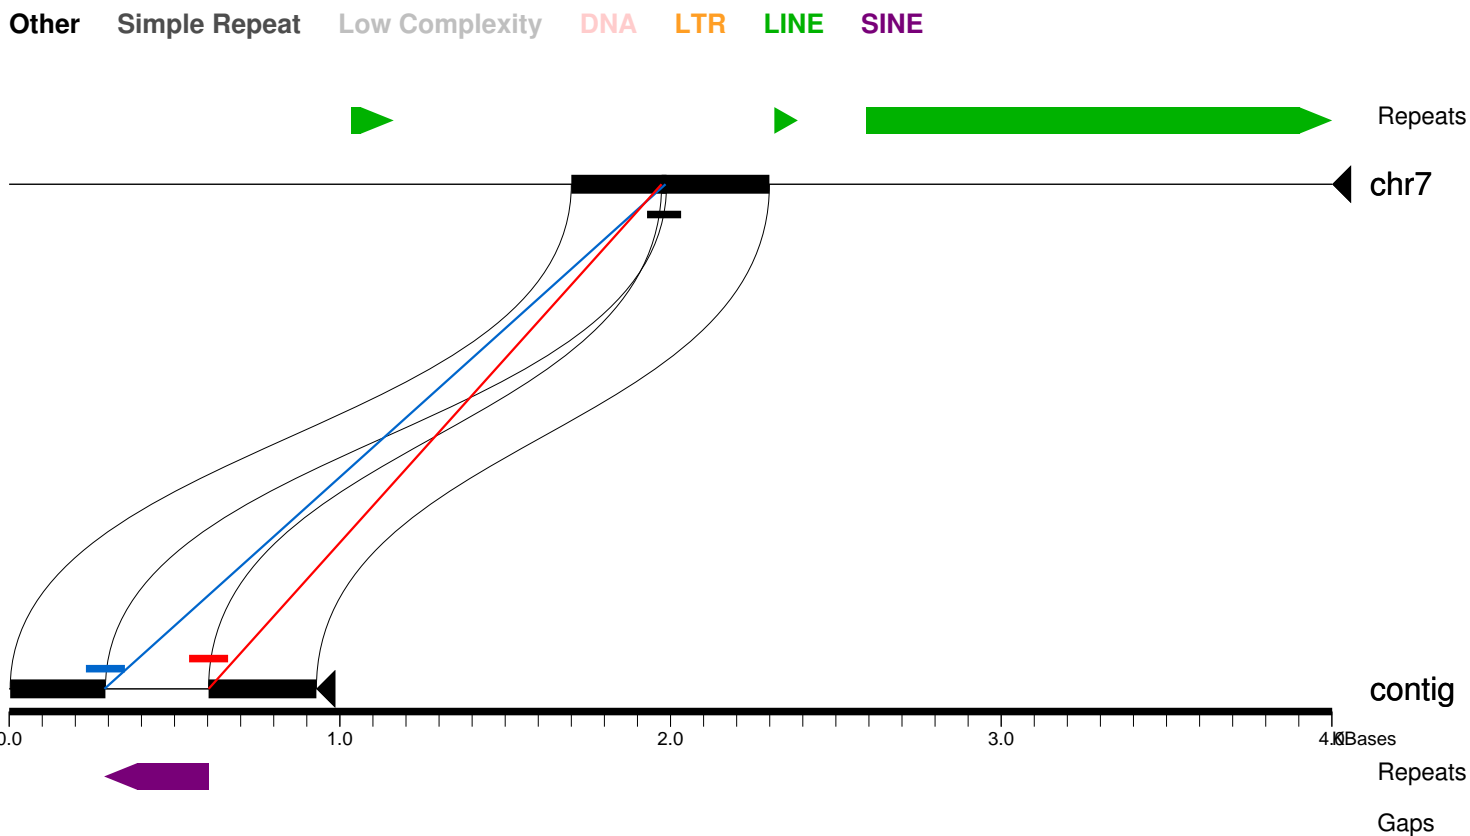

siteID: chr7\_8534969 Scaffitg1 + Breakpoint: chr7:8534953

chr7:8534907-8535012

Overlap Length: 14 INS size: 303 Genotyped: Yes

```
left      T-----CTTAAGGCCTTC--AACTGATTTGATGA-----GACCCACCCACATTATGGAGAGTAATCAG
chrom     T-----CTTAAGGCCTTC--AACTGATTTGATGA-----GACCCACCCACATTATGGAGAGTAATCAG
right     CACCCGCCTC-GGCCTCCCAAAGTGCTGGGATTACAGGCGTGAGCCACCGCGCCCGGCCTGAGTAATCAG
          1111111*1*11*****1*11**1**1*11***1*1111111**1*****111111111111*****
```

```
left      CTTTTTTTTTTTTTTTTTGAGACGGAGTCTCGCTCTGTCGCCCAGGCTGGACTGCGGACTGCAG
chrom     CTTTAAATCTAAGTCT-----ACTGA-----TTTAAAGATTAATCACATCTAAAAAATATT-
right     CTTTAAATCTAAGTCT-----ACTGA-----TTTAAAGATTAATCACATCTAAAAAATATT-
          ***22*2*222*2*22222**2**2222222*2*222*222*22*2222**2222*2*2222
```

Other Simple Repeat Low Complexity DNA LTR LINE SINE

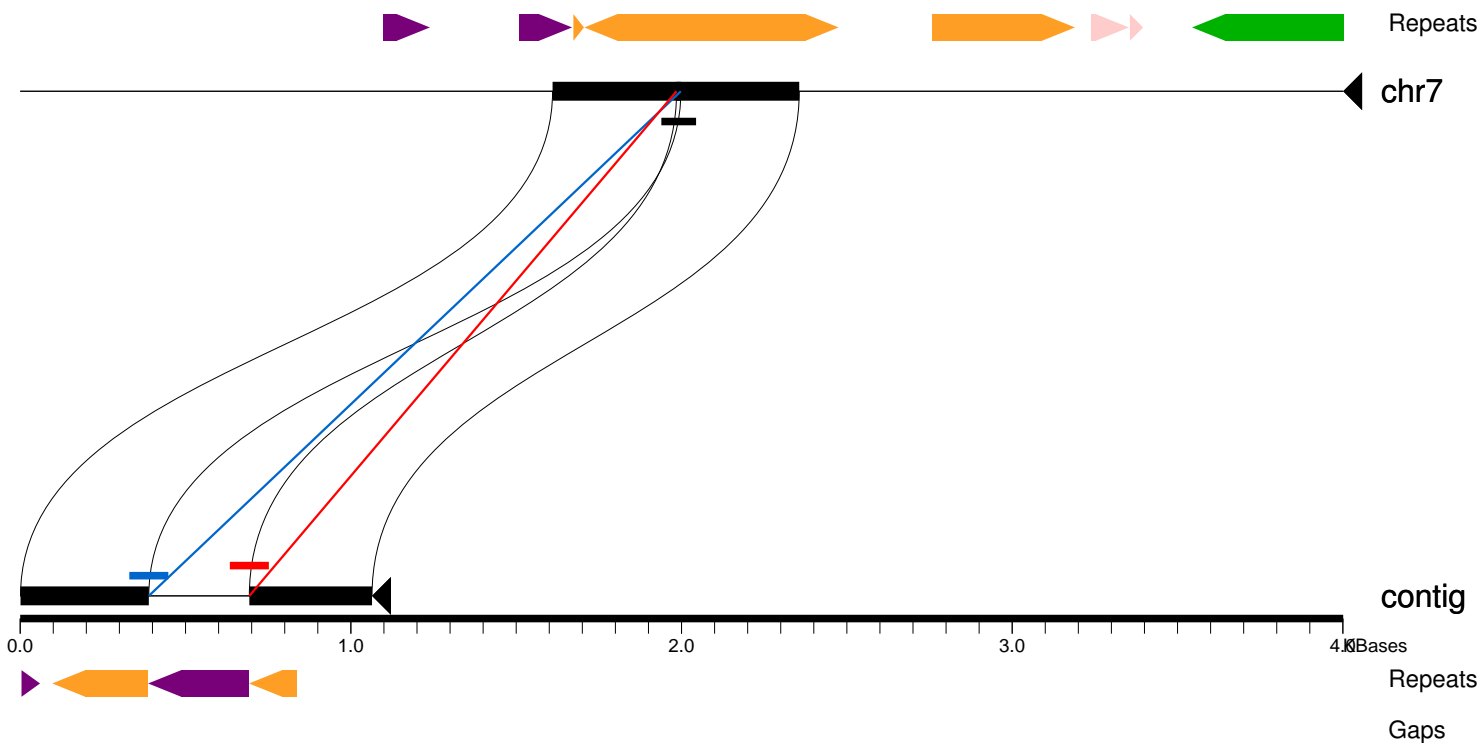

siteID: chr7\_88380340 Scaffitg2 - Breakpoint: chr7:88380340

chr7:88380285-88380399

Overlap Length: 5 INS size: 409 Genotyped: No

```
left  CTTGAATTGTATGTAAATGAAATGACAGTTTGTAGCCATTTGTGTCCTCAATTCTT----TTGCTNNNNNN
chrom CTTGAATTGTATGTAAATGAAATGACAGTTTGTAGCCATTTGTGTCCTCAATTCTT----TTGCTTATTTT
right CCGCCCGCCTCGGCCTCCCAAAGTGCTGGGATTACAGGCGTGAGCCACCGCGCCCGGCCTTGCTTATTTT
      *11111111*11*111111***111*1*1111**111111**1*1*1*1111*111111*****222222
```

```
left  NNNNNNNNNNNNNNNNNNNNNNNNNNNNNNNNNNNNNNNNNNNNNNNNNNNNNNNNNNNNNNNNNNNNN
chrom TATGTCTAGGATATTAATATGTGTTAAGATATGAACATTGCAAGCAAGT-----
right TATGTCTAGGATATTAATATGTGTTAAGATATGAACATTGCAAGCAAGT-----
      22222222222222222222222222222222222222222222222222222222222222222222
```

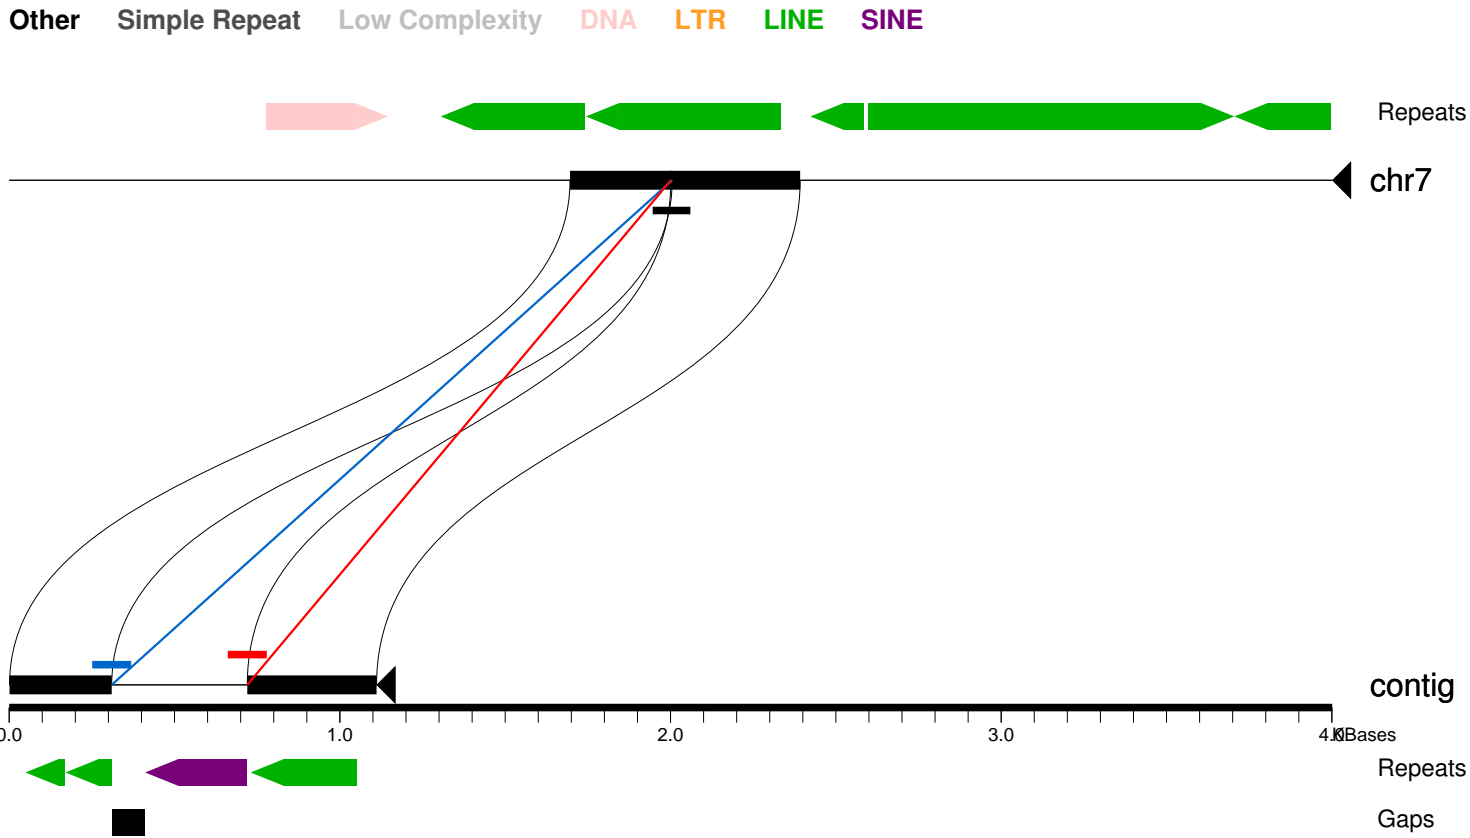



siteID: chr7\_91751560 Scaffoldig3 - Breakpoint: chr7:91751535

chr7:91751493-91751594

Overlap Length: 18 INS size: 297 Genotyped: Yes

```
left  C----CTGTA--ACAA-----ATAAATTGAATTAGT---AAGTAAAGTCTTCTCAGAAAGAAAAGCA
chrom C----CTGTA--ACAA-----ATAAATTGAATTAGT---AAGTAAAGTCTTCTCAGAAAGAAAAGCA
right CGCCACTGCACTCCAGCCTGGGCGACAGCGAGACTCCGTCTCAAAAAAAAAAAAAAAAAAAAGAAAAGCA
      *1111***1*111**111111111*1*1111**1*11**111**11***11111111*1*****
```

  

```
left  CAGATCTGGCCGGGCGCGGTGGCTCACGCCTGTAATCCCAGCACTTTGGGAGGCCGAGGCGGGCGG
chrom CAGATCTAGATGA-----TTTCACTGCTG-AATTTTTGCAAATATGTAAAAAA-----GG
right CAGATCTAGATGA-----TTTCACTGCTG-AATTTTTGCAAATATGTAAAAAA-----GG
      *****2*22*2222222222*****22***2***2222***22*22*2*2222222222**
```

Other Simple Repeat Low Complexity DNA LTR LINE SINE

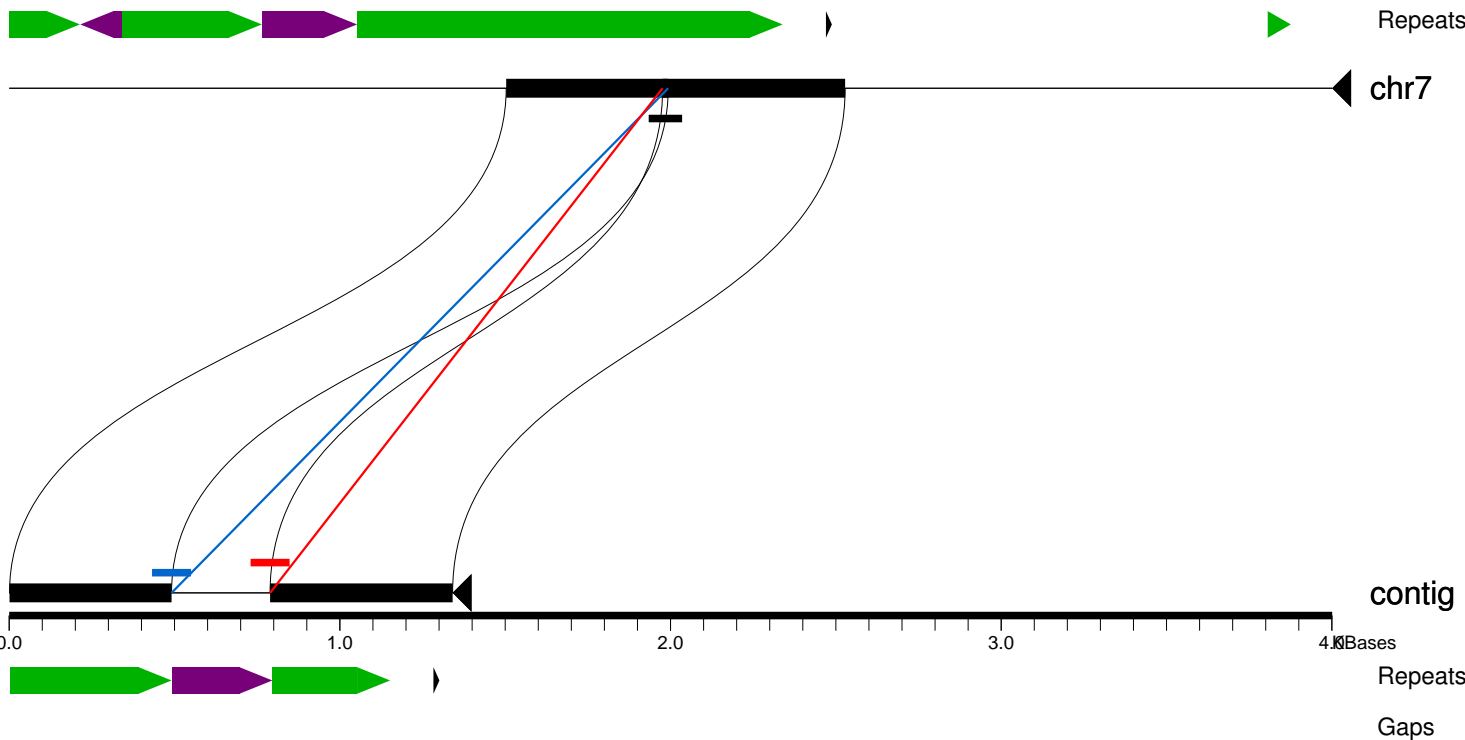



siteID: chr7\_93357403 Scaffitg1 - Breakpoint: chr7:93357378

chr7:93357218-93357572

Overlap Length: 35 INS size: 433 Genotyped: No

```
left -----TGCTACTTT
chrom CTTTAAAAGATTTGATTCCTTGACTTCATTACACCCCTCATAGTTTGTTCATCTCCCTGTCTACTTT
right GTAGAGACGGGT--TTCACCT---TTTTTTTAGCCG----GGATGGTCTCGATCTCC-TGAC--CTTG
      N2NN2N2N2NNN2  222N2N2  22NN22NN2N2N  2NN2N22N22N222222  **1*11***1
```

```
left ACCTCTGTTAGGCTTTTAACTGTAGGAGTCCTGATGGTTTCACACTTGTCTCCCTTTTCTTCTCTTTA
chrom ACCTCTGTTAGGCTTTTAACTGTAGGAGTCCTGATGGTTTCACACTTGTCTCCCTTTTCTTCTCTTTA
right TGATCCGCCCGCCTCGGC-CTCCCAAAGTGCTGG-GATTACAGGCGTGAGCCAC-----
      111**1*111*1**11111**11111**1***1**11*1**1*11*1**111*1*1111111111111111
```

```
left CTGTTCTGCCTGATTTTACCATTTCATGTCTTTTTCATCTATATAGTGGNNNNNNNNNNN----
chrom CTGTTCTGCCTGATTTTACCATTTCATGTCTTTAATTCATCTATATAGTGGTTATTCCCAACTTTA
right CGCGCCCGGC-----CCATTTCTATGTCTTTAATTCATCTATATAGTGGTTATTCCCAACTTTA
      *11*11*1***1111111111******22**2*****222222222222222
```

```
left -----
chrom TATCTCTAGCTCAAATTTATCTTCCAGGCTCTAGAAAAAAAAATATCAAGCATTCTATTATAAATCTCCACC
right TATCTCTAGCTCAAATTTATCTTCCAGGCTCTAGAAAAAAAAATATCAAGCATTCTATTATAAATCTCCACC
      2222222222222222222222222222222222222222222222222222222222222222222222
```

```
left -----
chrom ATACATTTTCATGGGTACTTCAAATAATACCATGCCCAAACAGAAAGTTATGATCCTCCCATCACACGAGCA
right ATACATTTTCATGGGTACTTCAAATAATACCATGCCCAAAC-----
      2222222222222222222222222222222222222222222222222222222222222222222222
```

```
left -----
chrom ACCC
right -----
```

Other Simple Repeat Low Complexity DNA LTR LINE SINE

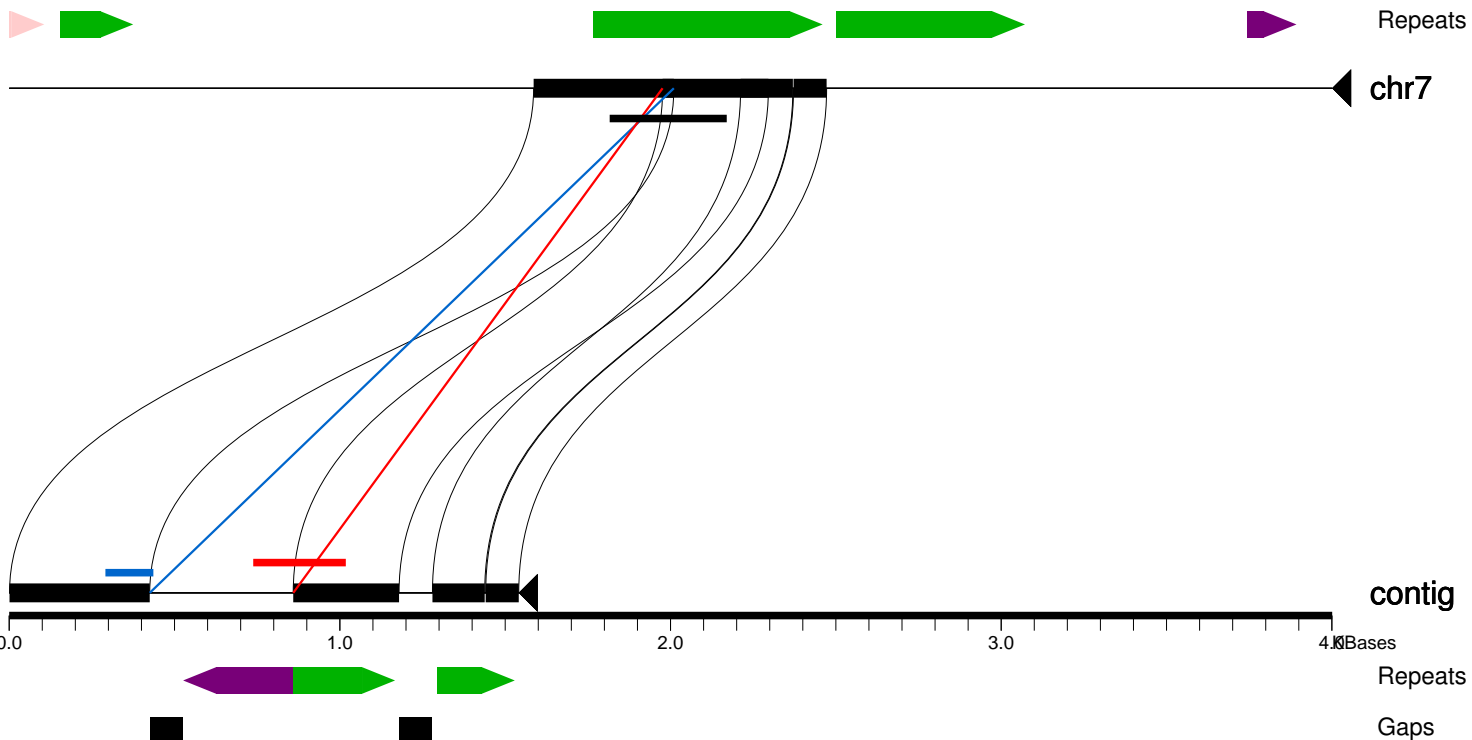

siteID: chr7\_94779038 Scaffitg3 - Breakpoint: chr7:94779052

chr7:94779006-94779091

Overlap Length: 14 INS size: 314 Genotyped: Yes

```

left   -----ACTACA-----AAACTGTGAT-CAAAGTTTGGAAATAATTAATAAATG
chrom  -----ACTACA-----AAACTGTGAT-CAAAGTTTGGAAATAATTAATAAATG
right  TCGGCCACTGCAGTCCGCAGTCCGGCCTGGGGCGACAGAGCGAGACTCCGTCTCAAAAAAAAAAAAAAAAAA
111111***1**1111111111111111111111111111*1*11*1**11*111**1*11***1**11**1***11
  
```

```

left   GTAA----GATATTCTACATTGGGCCGGGCGCGGTGGCTCACGCCGTGTA-ATCCCAGCACTTTGGGAGG
chrom  GTAA----GATATTCTACATTCA-----TGGATAA-----GAAGATGTCAGTTCTT-----
right  AAAAAAAAAAGATATTCTACATTCA-----TGGATAA-----GAAGATGTCAGTTCTT-----
11**111111*****222222222222***2*2*22222*2*2**22***22***222222
  
```

```

left   CCGAGGCGGGTGG
chrom  CC-----
right  CC-----
**222222222222
  
```

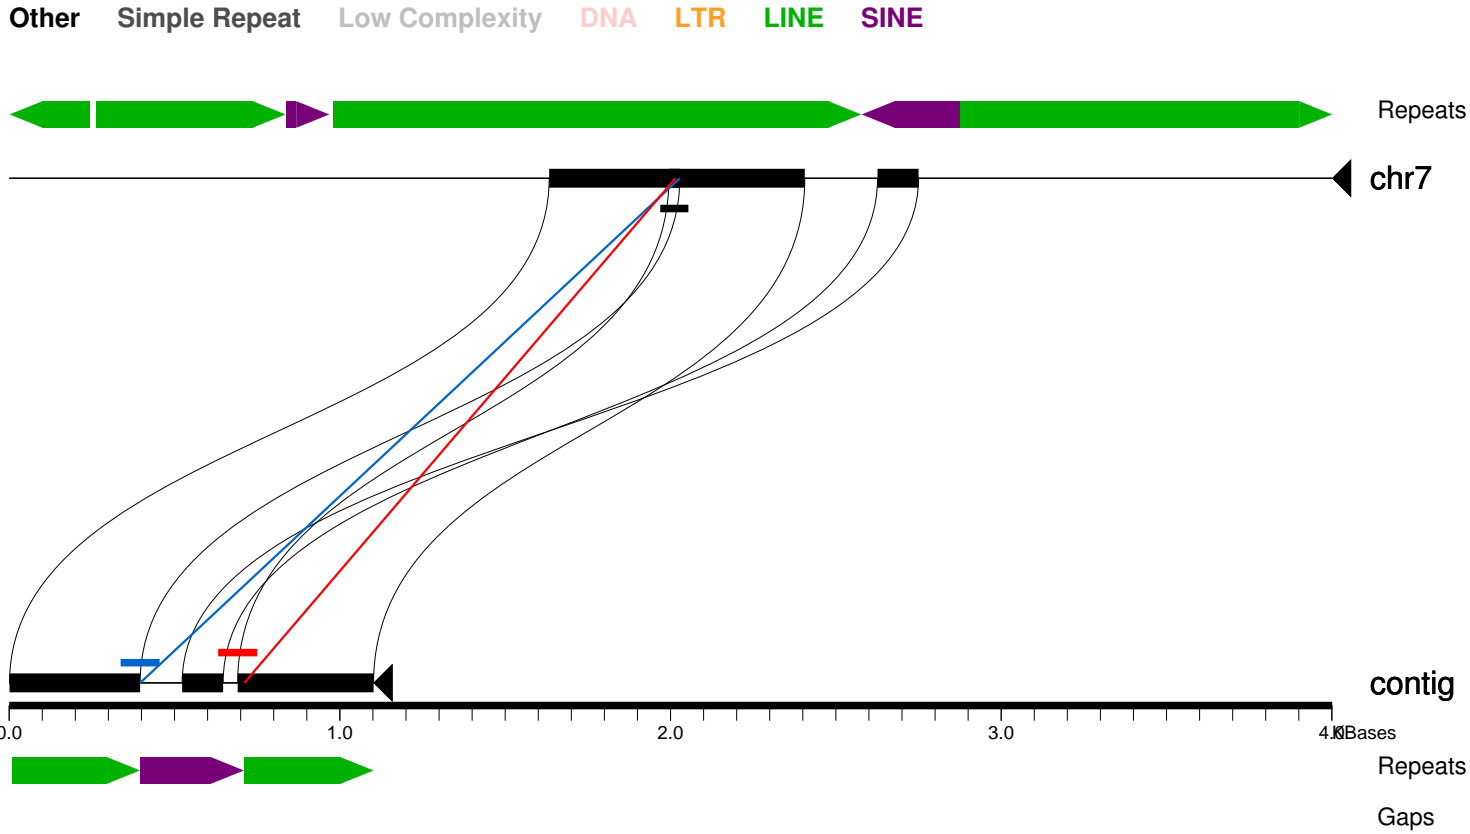



**siteID: chr7\_95101200 Scaffold1 + Breakpoint: chr7:95101183**  
**chr7:95101133-95101242**  
**Overlap Length: 10 INS size: 286 Genotyped: Yes**

```

left  -----AT--TTTATGTGTGCTAACACTATGCTTTCTTAGGCAGGTACTATTATTATCTGCTTTTTTTT
chrom -----AT--TTTATGTGTGCTAACACTATGCTTTCTTAGGCAGGTACTATTATTATCTGCTTTTTTTT
right TAGCCAGGATGGTCTCGATCTCCTGACCTCATGATCCACCCGCTCGGCCTCCC AAAAGT-TGCTTTTTTTT
      111111111**11*1*111*1*1**1**111***1*111111*1*11*11**111*111*1*****
left  TTTTTTTTTTTTTTTTTTTTTTTTTTTTTTTTTTTTGGAGACGGAGTCTCGCTCTGTCGCCCA----
chrom AACAGATGAAGAAACC-----GAGCCACACAGAGGTTAAATAACTTGCCCAAGGG
right AACAGATGAAGAAACC-----GAGCCACACAGAGGTTAAATAACTTGCCCAAGGG
      222222*2222222222222222222222222222222222222*2**2***22*222*222*2*****2222
  
```

Other   Simple Repeat   Low Complexity   DNA   LTR   LINE   SINE

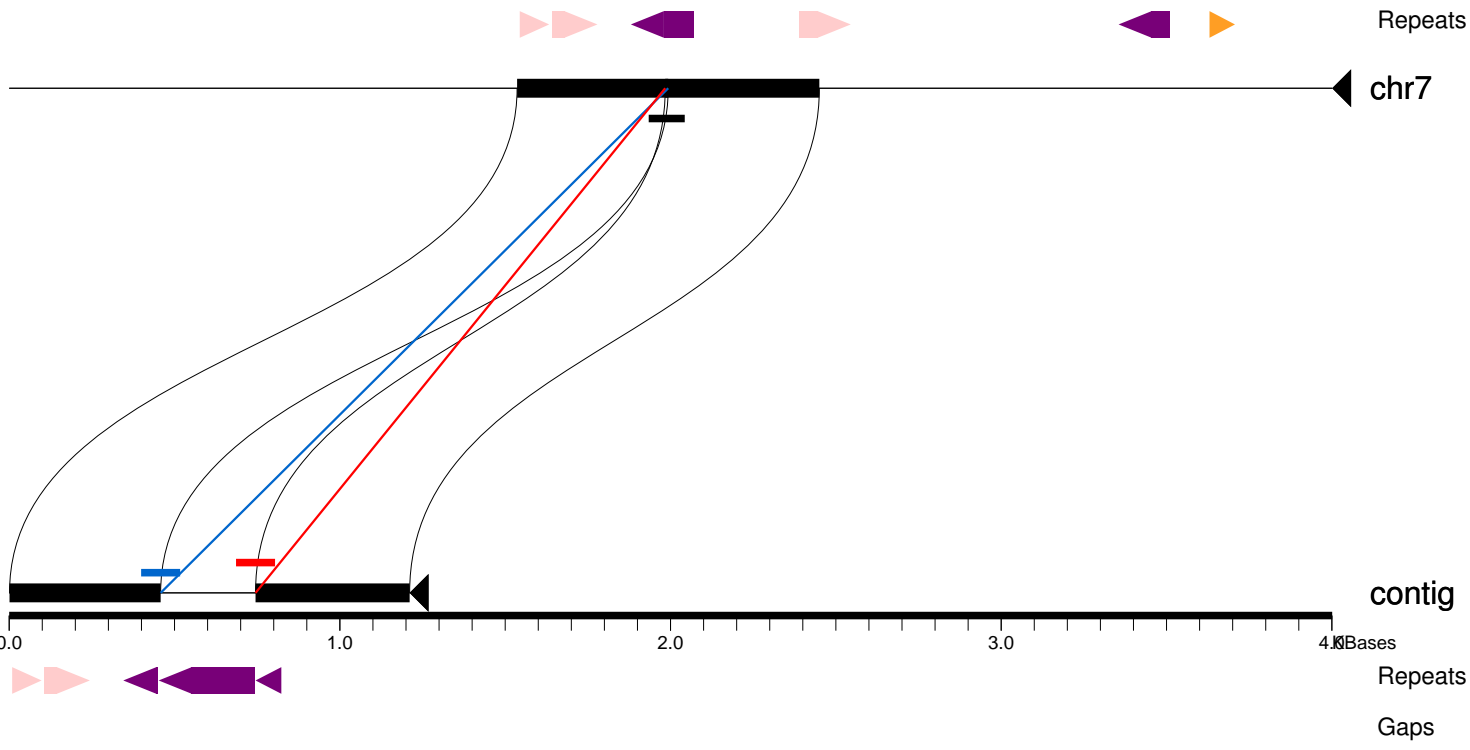

siteID: chr7\_95264771 Scafftig1 + Breakpoint: chr7:95264780

chr7:95264739-95264839

Overlap Length: 5 INS size: 311 Genotyped: Yes

```
left      TT-----CAAAAGCCCATCACCTTAAT--AAATAAATGTTTGGATTTT-----TGCAATTTTTT
chrom     TT-----CAAAAGCCCATCACCTTAAT--AAATAAATGTTTGGATTTT-----TGCAT-----T
right    CCGCCCGCCTCGGCCTCCCAAAGTGCTGGGATTACAGGCGTGAGCCACCGCGCCCGGCCGTGCAT-----T
          1111111*1111***111**111*11*111*1**1*1*11**111111111111111111*****22222*
```

```
left      TATTTTTTTTTTTTTTTTTTTTTTTTTGAGACGGAGTCTCGCTCTGTCGCCAGGCTGGAGTGCAGTGGCG
chrom     TATTCCTTTATTTTAATCT-----AGATGAATGCTTAATTCCTCTTACA---TTTAAT-CATAA---
right    TATTCCTTTATTTTAATCT-----AGATGAATGCTTAATTCCTCTTACA---TTTAAT-CATAA---
          ****2***2****22*2*222222***2*2*22**222*222**222**222*22*2*2**222222
```

Other Simple Repeat Low Complexity DNA LTR LINE SINE

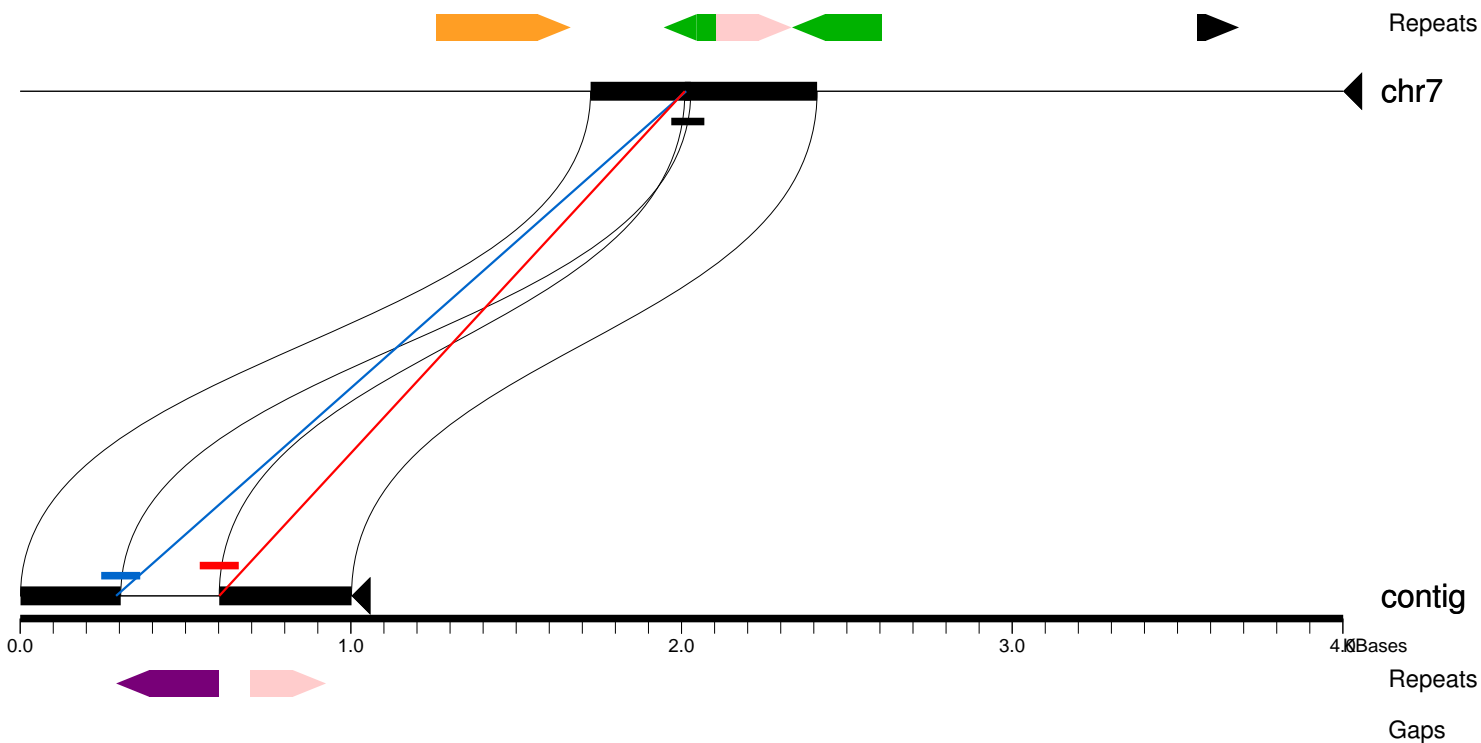

siteID: chr7\_97067530 Scaffold10 + Breakpoint: chr7:97067522

chr7:97067479-97067581

Overlap Length: 17 INS size: 301 Genotyped: Yes

```
left   AT-GACATCTGTATACATGCAAAATGAAACAAT--CTGGCAATATA-----CATTTATTACT
chrom  AT-GACATCTGTATACATGCAAAATGAAACAAT--CTGGCAATATA-----CATTTATTACT
right  TCCGCCCGCCTCGGCCTCCCAAAGTGCTGGGATTACAGGCGTGAGCCACCGCGCCCGGC-CATTTATTACT
       111*1*11*111111*111****1**11111*11*1***111*1111111111111111*****
```

```
left   ATATTTTTTTTTT----TTTTTTTTTTTTGAGACGGAGTCTCGCTCTGTCGCCAGGCTGGAGTGCAGTG
chrom  ATATTTGACAAAGAAATTTCTTAAATTATAATGTGAAACCTCATTTTATA-----
right  ATATTTGACAAAGAAATTTCTTAAATTATAATGTGAAACCTCATTTTATA-----
       *****2222222222**2**222**2*2*222*2*22***22*2*2*222222222222222222222
```

Other Simple Repeat Low Complexity DNA LTR LINE SINE

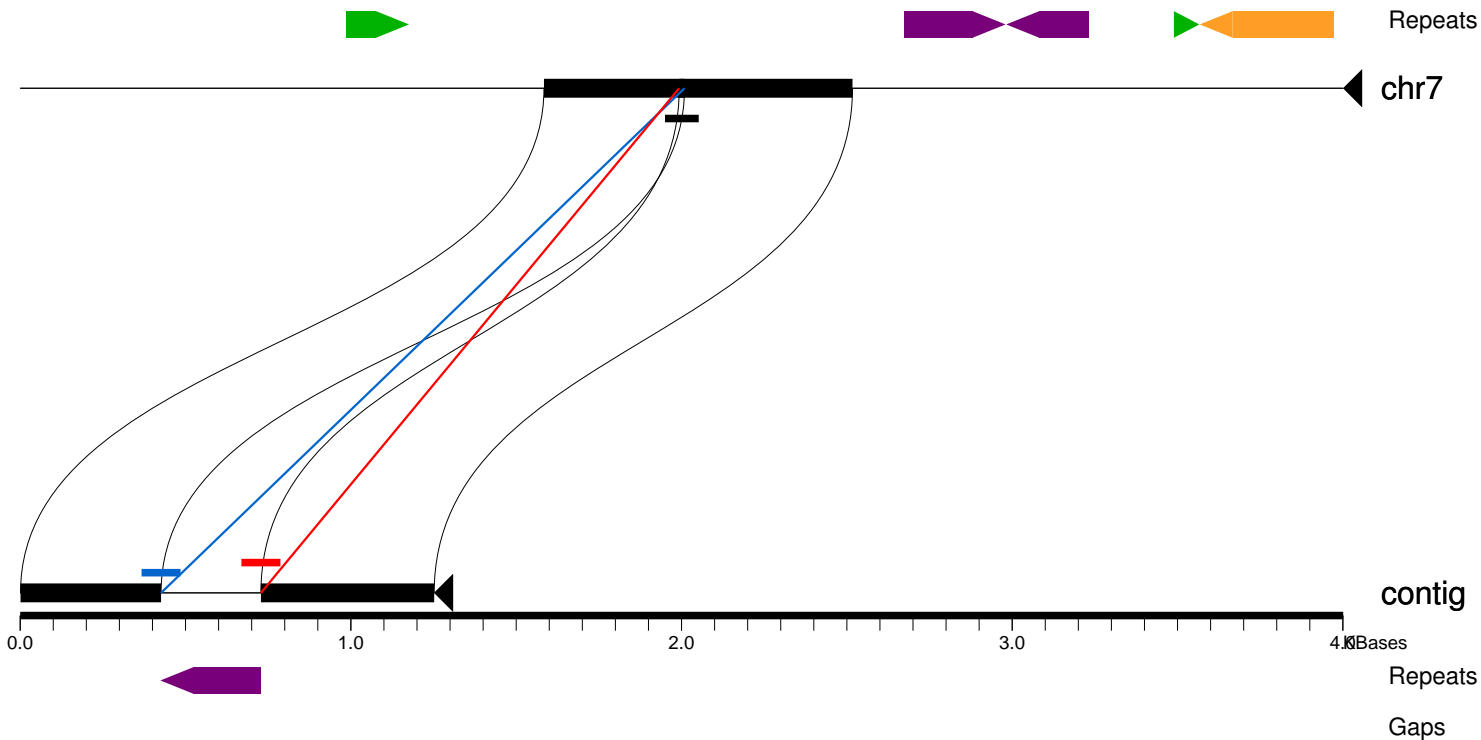



siteID: chr7\_gl000195\_random\_56203 Scafftig5 - Breakpoint: chr7\_gl000195\_random:56179

chr7\_gl000195\_random:56019-56355

Overlap Length: 17 INS size: 313 Genotyped: No

```
left -----TATTGAGTGACTCAGTTTTTTATTTGAAT
chrom CT-ATGACAGAGGAAGTCTTCACAAAGTCTCCAGTACTAGGTATTTGAGTGACTCAGTTTTTTATTTGAAT
right TTTAGTAGAGACGGGGT-TTCACCTTGTTAGCCAGGAT--GGTCTCGATCTCCTGACCTCATGATCCACC
N212NN2N222N2NN22 22222NNN22NNN2222N2N 22*1*1**1111**1*11*11*1**11*11
```

```
left AAAATGGAATACTTCTGATGCCAGTACTATGGCCCTTCGGTTTTGAGGAAAATATCATCTTGTATGTTG
chrom AAAATGGAATACTTCTGATGCCAGTACTATGGCCCTTCGGTTTTGAGGAAAATATCATCTTGTATGTTG
right CGCCTCGG---CCTCCCAA----AGTGCT-----CGGATTACAGGC-----GTGA
1111*1*1111*1***11*1111***1**111111111***1**11***11111111111111111***11
```

```
left GCTAACAAGGAGATAGGAGTTCAAATCAAATTTGTTTTTTGTTTT---TTTGTTTTTTTTTTTTGGAGAC
chrom GCTAACAAGGAGATAGGAGTTCAAATCAAATTTGTTTTTTGTTTCATACTGGCTTTAAGGCAGTGATTAGAAAA
right GCCACC---GCGCCTGGCCT-CAAATCAAATTTGTTTTTTGTTTCATACTGGCTTTAAGGCAGTGATTAGAAAA
**1*1*111*1*111**11*1*****1*2*22*22*222***2222222*22**2**2*2
```

```
left GG-----AGTCTCGCTCTGTCGCCAG-GCTGGACTGCGGACTGCAGTGGCGCAATCTCTGCT-CAC-T
chrom GGCTAATAGGTGGGTTCCTGTAGGGGATTGCTGGAAGGAAAAGTAGGAATATGGAAAAGTCATGAGACATAT
right GGCTAATAGGTGGGTTCCTGTAGGGGATTGCTGGAAGGAAAAGTAGGAATATGGAAAATCATGAGACATAT
**222222**2222*2*****2*222*22*****22*222222*2*2*222*2**N222**222**22*
```

```
left GCAAGCTCCGCTTCCCGGGTTCACGCCATTCTCTGCC---TCAGCCTCCCA-AGTAGC
chrom ACAGTCATCTCTTCTTGTTCCTCACAGGTCACATACAAAATTCAGGGAGAGTTAGTAT-
right ACAGTCATCTCTTCTTGTTCCTCACAGGTCACATACAAA-----
2**22*22*2***22*22*2*2*2*222**2*2*2*22 1111NNNNNNN 1111N2
```

Other Simple Repeat Low Complexity DNA LTR LINE SINE

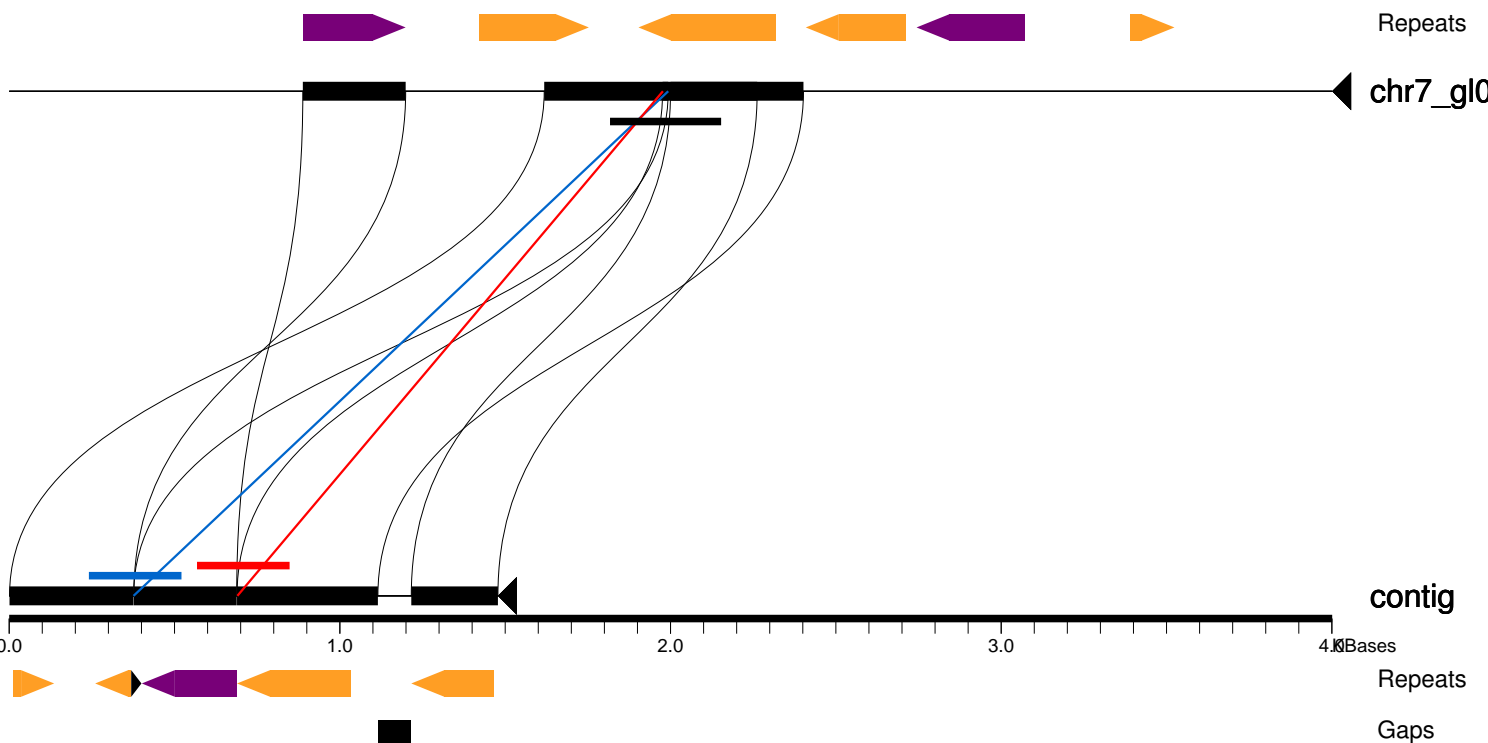

siteID: chr8\_10132606 Scaffitig1 + Breakpoint: chr8:10132592

chr8:10132549-10132651

Overlap Length: 13 INS size: 315 Genotyped: Yes

```
left  AGGACAT-----GACGTGCAAG-TGCATTATTTTCATCAGTTTAGATAT-----GAGAATAATT
chrom AGGACAT-----GACGTGCAAA-TGCATTATTTTCATCAGTTTAGATAT-----GAGAATAATT
right CCGCCCGCCTCGGCCTCCCAAAGTGCTGGGATTACAGGCGTG-AGCCACCGCGCCCGGCCGAGAATAATT
      11*1*11111111*1*111***21***11111*1**111**11**11*111111111111*****

left  CTTTTTTTTTTTTTTTTTTTTTTTTTTTTTTTTTTTTTTTTTTTTTTTTTTTTTGAGACGGAGTCTCGCTCTGTCGCCAGGC
chrom CTATTGCTGCCTTTTCATATTTCCAGGTGTCCTTTTT-----TCTGAAAATTTCT-----
right CTTATTGCTGCCTTTTCATATTTCCAGGTGTCCTTTTT-----TCTGAAAATTTCT-----
      **2***22*222***22*2**22222*2*22*****222222222***22222*2**22222222
```

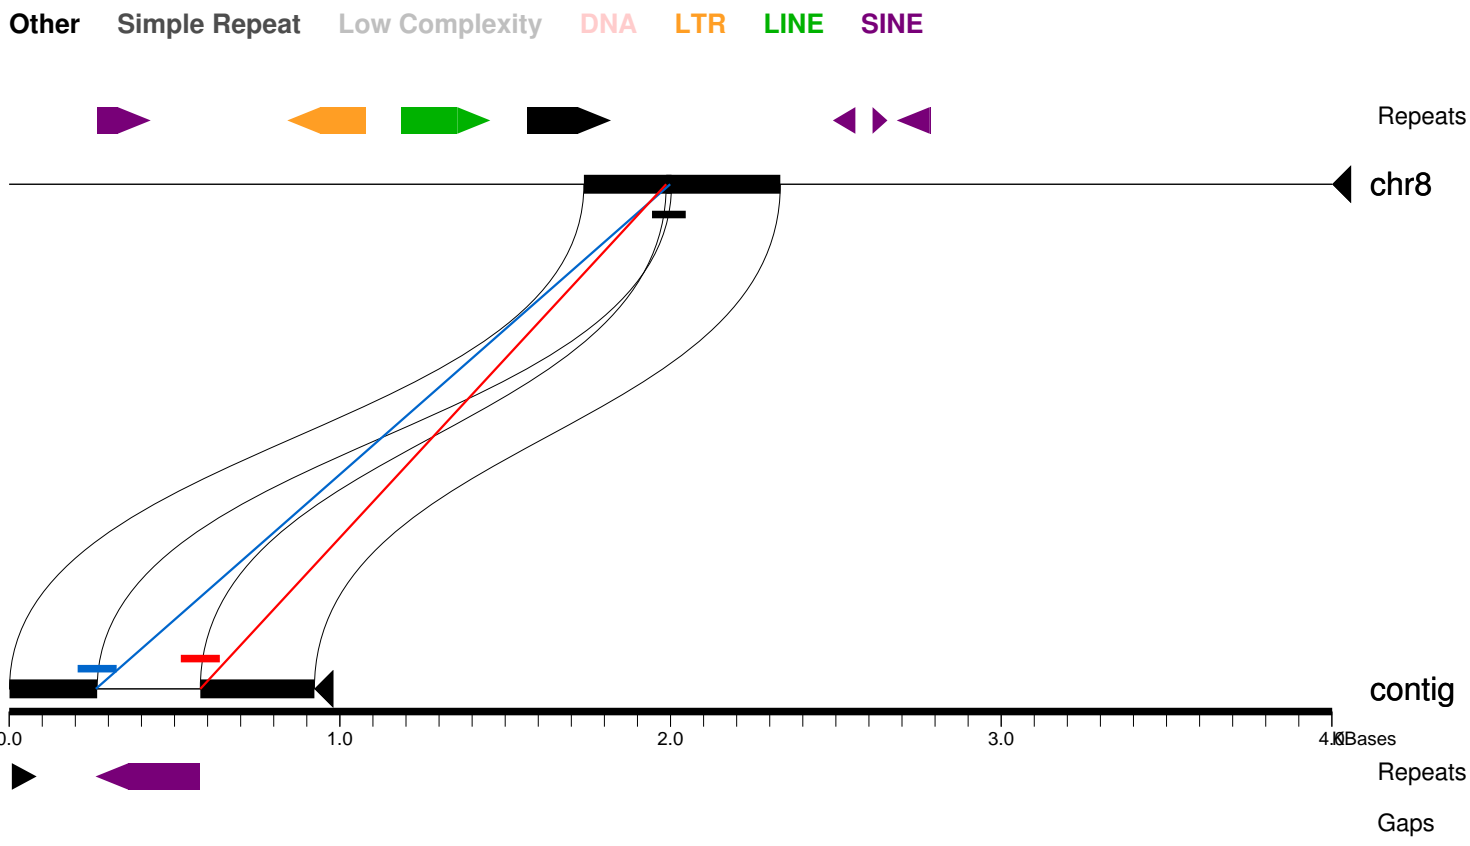

siteID: chr8\_106664528 Scafftig4 - Breakpoint: chr8:106664512

chr8:106664352-106664682

Overlap Length: 11 INS size: 319 Genotyped: Yes

```

left      TT-----ACTGGGTGGTTCCTTTTTGGACCCTTTACTGGTAAATAGTAACAGTGTCTGTTC-AGCTC
chrom     TTGCTATTACTGGGTGGTTCCTTTTTGGACCCTTTACTGGTAAATAGTAACAGTGTCTGTTC-AGCTC
right     TT--TAGTAGAGACGGGGTTT-----CACCGTTT-----TAGCCGGGATGGTCTCGATCCC
**      22N2*11*111**1*1*1111111*1*11**11111111111**1*1*1*111**1**1*1*1*

```

```

left      TTCCTAGGGGAAGGTCAGTCAGAAAACCTCTACTCTTTGCTCTAATACTGAAATGAGGCTTTTCATT
chrom     TTCCTAGGGGAAGGTCAGTCAGAAAACCTCTACTCTTTGCTCTAATACTGAAATGAGGCTTTTCATT
right     CTGACCTCGTGA---TCCGCCCG---CCTCGGC-CT---CCCAGGATGCTGGGATTACAGGCGTGAG---
1*1**111*1**111**1*1*1*111***11*1**111*1*1*111***11***11***1**1*111111

```

```

left      TTACCACTGATGTAGAAGTCAAGCCCTTTT-----TTTTTTGAGACGGA----GTCTCGCT-----
chrom     TTACCACTGATGTAGAAGTCAAGCCCATTTTGAAGCCTATTTTTAAAAATAAAAACGTCACCTTATATGC
right     ---CCACCGCGCCCG---CCAGCCCATTTTGAAGCCTATTTTTAAAAATAAAAACGTCACCTTATATGC
111***1*11111*1111*1*1***2***222222*2***2*2*222*2222***2*22*222222

```

```

left      CTGTCGCCAGG----CTGGAGTGCAGTGGCAGGATCTCG--GCTCACTGC-----AAGC---TCCG
chrom     CTGACATACAGTAGTACTTCAGAGAAGTTGTATTCTCATGAGGCTGTCTGAGGCTGTGAAGACTGTCAA
right     CTGACATACAGTAGTACTTCAGAGAAGTTGTATTCTCATGAGGCTGTCTGAGGCTGTGAAGACTGTCAA
***2*222***22222**22**2*2***2*2*222**22*22***22***222222222***2222**22

```

```

left      CCTCCG--GTTTCACGCCATTCTCTGCTCAGCTCCCAAG-----
chrom     ACAACAGTAGGGTCAACCAAATAGTATACCATGGTGTGCAAGCAAGAGTAT
right     ACAACAGTAGGGTCAACCAAATAGTATACCATGGTGTGCA-----
2*22*2*22**2***22*2*2*2222*2**222*22*22**11

```

Other Simple Repeat Low Complexity DNA LTR LINE SINE

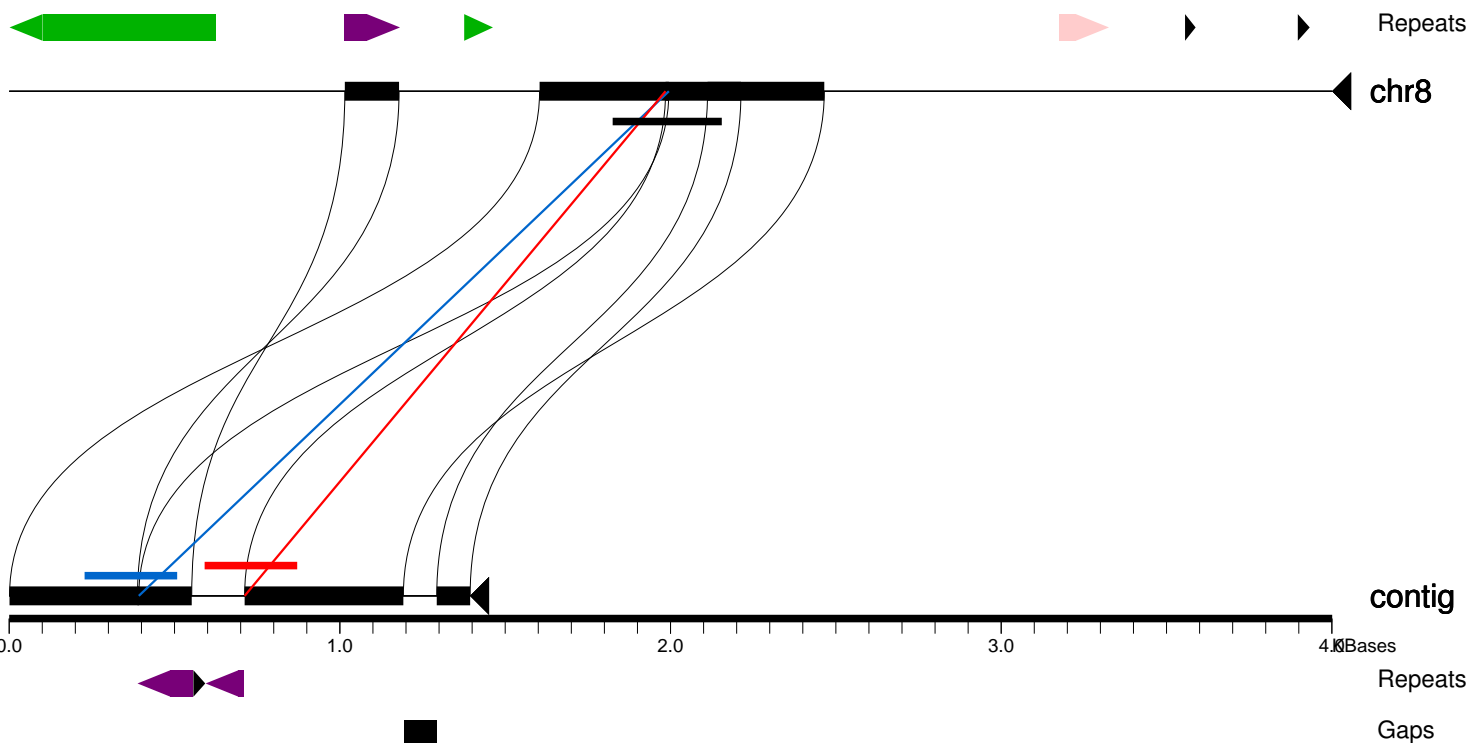



siteID: chr8\_107207895 Scafftig8 + Breakpoint: chr8:107207879

chr8:107207829-107207938

Overlap Length: 10 INS size: 302 Genotyped: Yes

```
left  GTCTTCTT--TCTGAATTC--ATTTTTTG----TCCA--CTTGAATTTTC-CTCCTGTTAAGACACTTTT
chrom GTCTTCTT--TCTGAATTC--ATTTTTTG----TCCA--CTTGAATTTTC-CTCCTGTTAAGACACTTTT
right TCCACCCGCCTCGGCCTCCCAAAGTGCTGGGATTACAGGCGTGAGCCACCGCGCCCGGC--GACACTTTT
      11*11*1111**1*11*1*11*11*11**1111*1**11*1***11111*1*1**1*1111*****
```

```
left  TTTTTTTTTTTTTTTTTGAGACGGAGTCTCGCTCTGTCGCCAGGCCGGACTGCGGACTGC
chrom TAACTTAATACAGAT-GAGCCATTG-CTTTCTCTGTCTAGT-GTCC-----CTAATTTA
right TAACTTAATACAGAT-GAGCCATTG-CTTTCTCTGTCTAGT-GTCC-----CTAATTTA
      *222**22*22222*2***2*222*2**22*****22222*2**222222*22*2*22
```

Other Simple Repeat Low Complexity DNA LTR LINE SINE

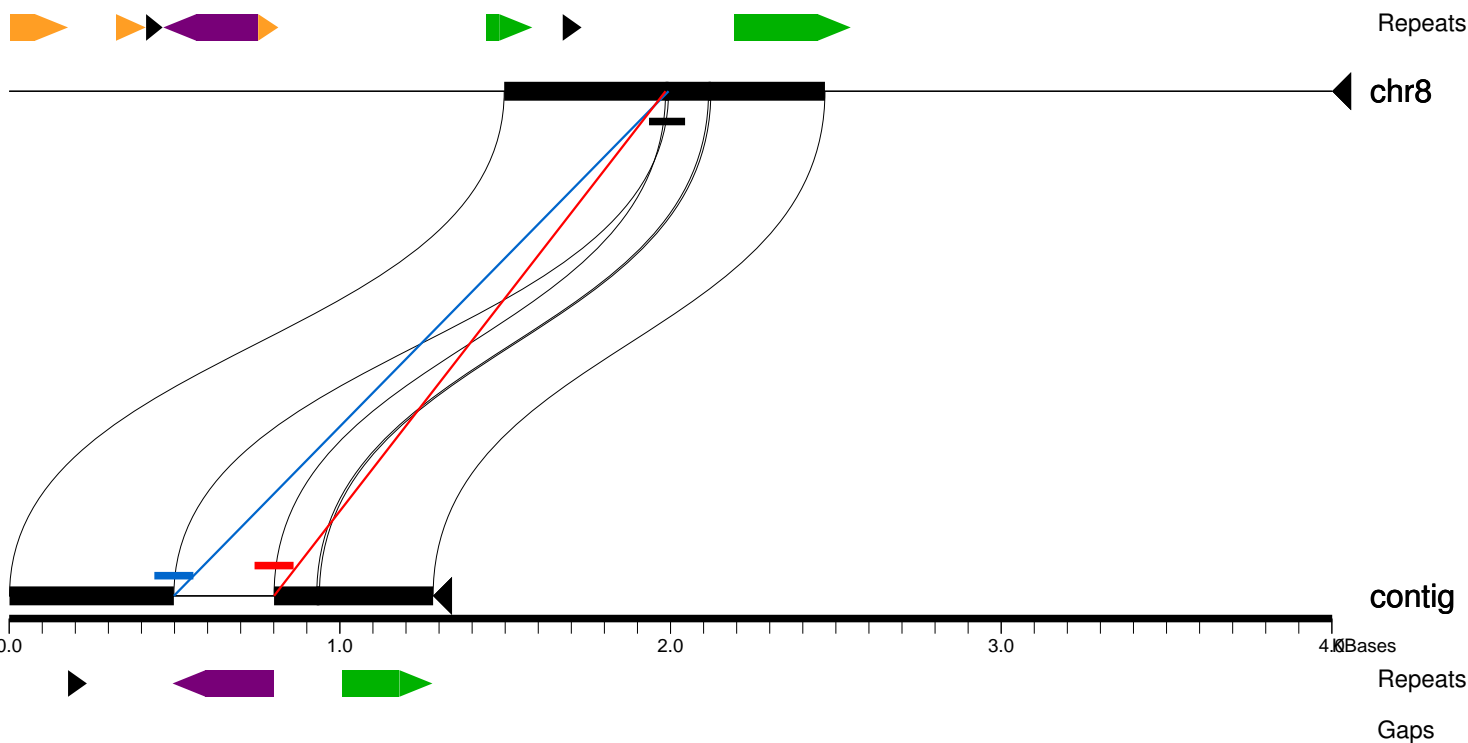



siteID: chr8\_108277409 Scafftig1 - Breakpoint: chr8:108277360

chr8:108277310-108277419

Overlap Length: 10 INS size: 444 Genotyped: No

```
left   CCCATCTGTTTAAATATGGCA---TTCTTCGAAGAACCTCTCTTACTATCTAGA-----AACATTTCTTT
chrom  CCCATCTGTTTAAATATGGCA---TTCTTCGAAGAACCTCTCTTACTATCTAGA-----AACATTTCTT-
right  CCACCCGCCTCGGCCTCCCAAAGTGCTGGGACTACAGGCGTGAGCCACCGCGCCCGGCCAACATTTCTT-
      **111*111*11111*11**111*1**11**11*1111*11111*1*1*11*1111111******2
```

```
left   NNNNNNNNNNNNNNNNNNNNNNNNNNNNNNNNNNNNNNNNNNNNNNNNNNNNNNNNNNNNNNNNNNNNNNN
chrom  -----ATATAAAACTTGCATTAACCTAGATCAGTGGCCCTCTAATGGATGTGCAT
right  -----ATATAAAACTTGCATTAACCTAGATCAGTGGCTCTCTAATGGATGTGCAT
      22222222222222222222222222222222222222222222222222222222222222222222
```

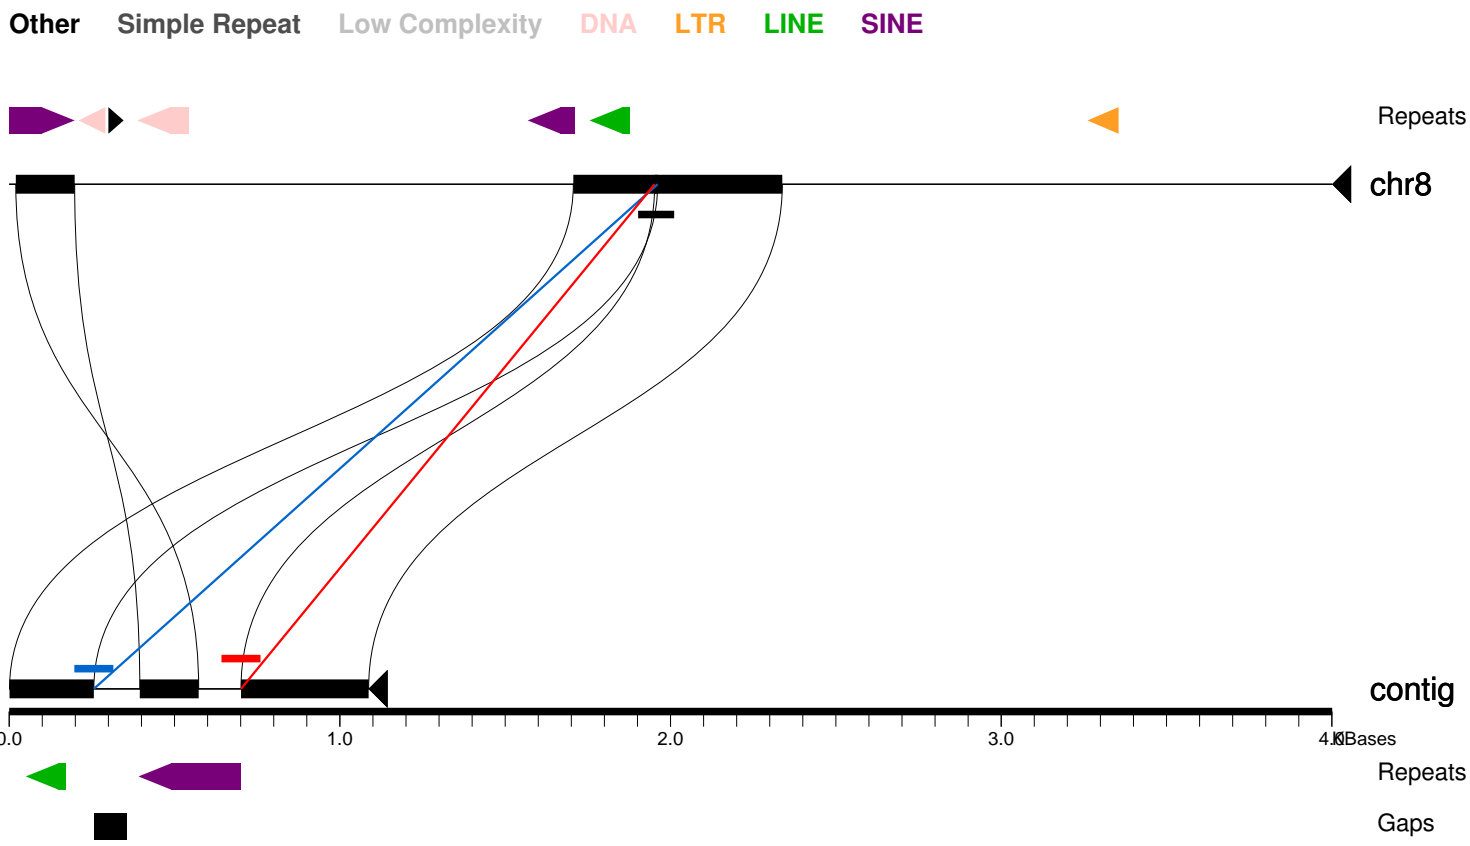





siteID: chr8\_110101597 Scafftig1 + Breakpoint: chr8:110101593

chr8:110101546-110101652

Overlap Length: 13 INS size: 314 Genotyped: Yes

```
left      TCATATTTCTTG-----AAAG-----GAATATAGTTCTGTGTACATAGCTAGAAACTGAGTGTACTT
chrom     TCATATTTCTTG-----AAAG-----GAATATAGTTCTGTGTACATAGCTAGAAACTGAGTGTACTT
right     CCGCCCGCCTCGGCCTCCCAAAGTGCTGGGATTACAGGCGTGAGC-CACCGCGCCCGGCCGAGTGTACTT
          1*1111111*1*1111111****1111111**1**1**111**1*11**11**1111111*1*****
```

```
left      TGTFFFFFFFFFFFFFFFFFFFFFFFFFFFFFFFFFFFFFFFFGGAGACGGAGTCTCGCTGTCGCCAG
chrom     TGTAAAAAAGTATAACATATAA-----TCATTCACTGTTACTTCATAAACTCCA-
right     TGTAAAAAAGTATAACATATAA-----TCATTCACTGTTACTTCATAAACTCCA-
          **2222222*2*222*2*2222222222222*22**2*2**2*222**222*22222***2
```

Other Simple Repeat Low Complexity DNA LTR LINE SINE

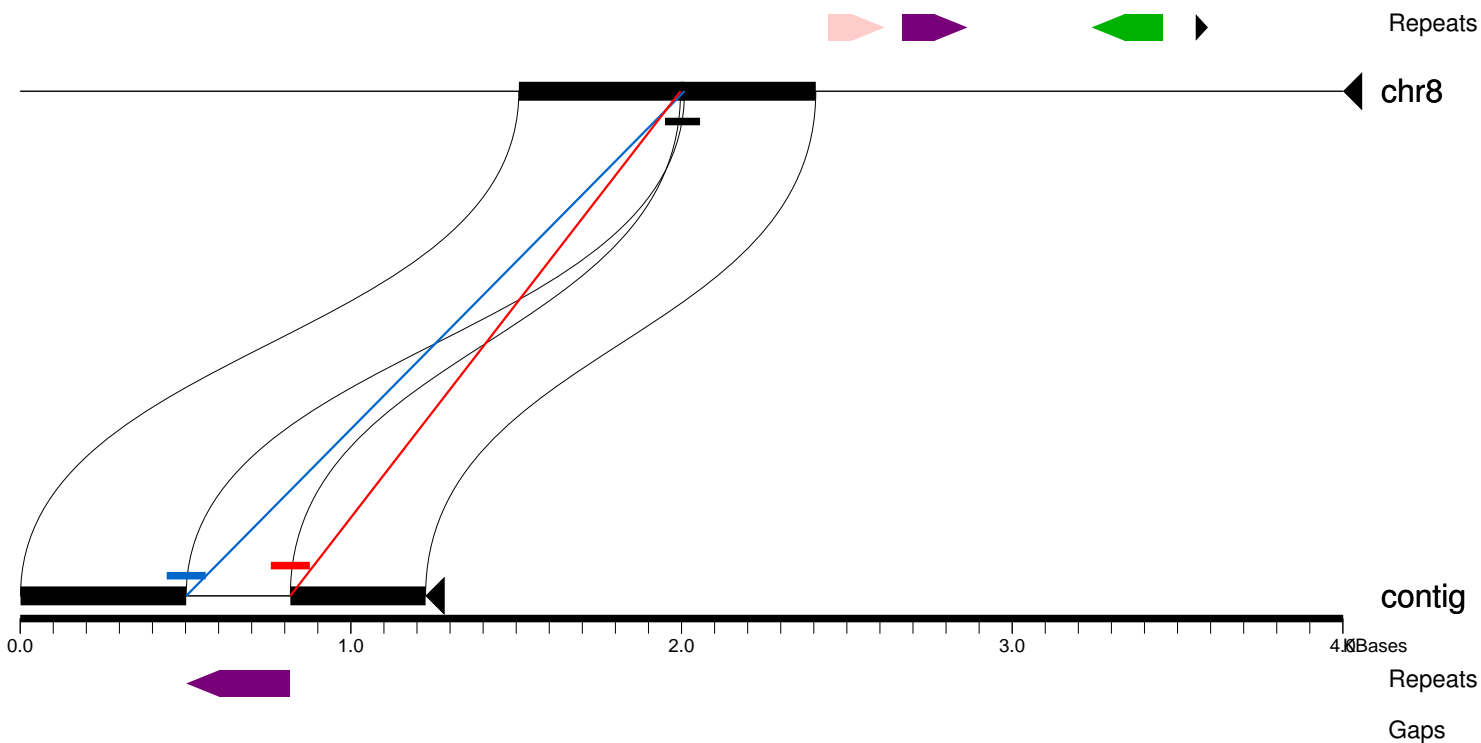

siteID: chr8\_110349290 Scafftig2 - Breakpoint: chr8:110349298

chr8:110349239-110349357

Overlap Length: 1 INS size: 399 Genotyped: No

```
left  TCACACAATAAGAAAAAGAGGTGC--ATCTGTTGCTGACTTTATTTTTGGATG---ATGGGAGTCNNNNN
chrom TCACACAATAAGAAAAAGAGGTGC--ATCTGTTGCTGACTTTATTTTTGGATG---ATGGGAGTCATTTA
right -----CAGGATGGTCTCGATCTCCTGACCTCGTGATCCGCCCGCCTCGGCCTCCCAAAGTGCTGCATTTA
11111**11*1*11111**11*1*11*1**11**1*111111111*11*11*1111*1*1*111*22222
```

```
left  NNNNNNNNNNNNNNNNNNNNNNNNNNNNNNNNNNNNNNNNNNNNNNNNNNNNNNNNNNNNNNNNNNNNN
chrom AAGTTTTAAGAAAGGAAATGACTAGATCACATTTACACTTTAGGAATCTTACTC
right AAGTTTTAAGAAAGGAAATGACTAGATCACATTTACACTTTAGGAATCTTACTC
222222222222222222222222222222222222222222222222222222222222222222222222
```

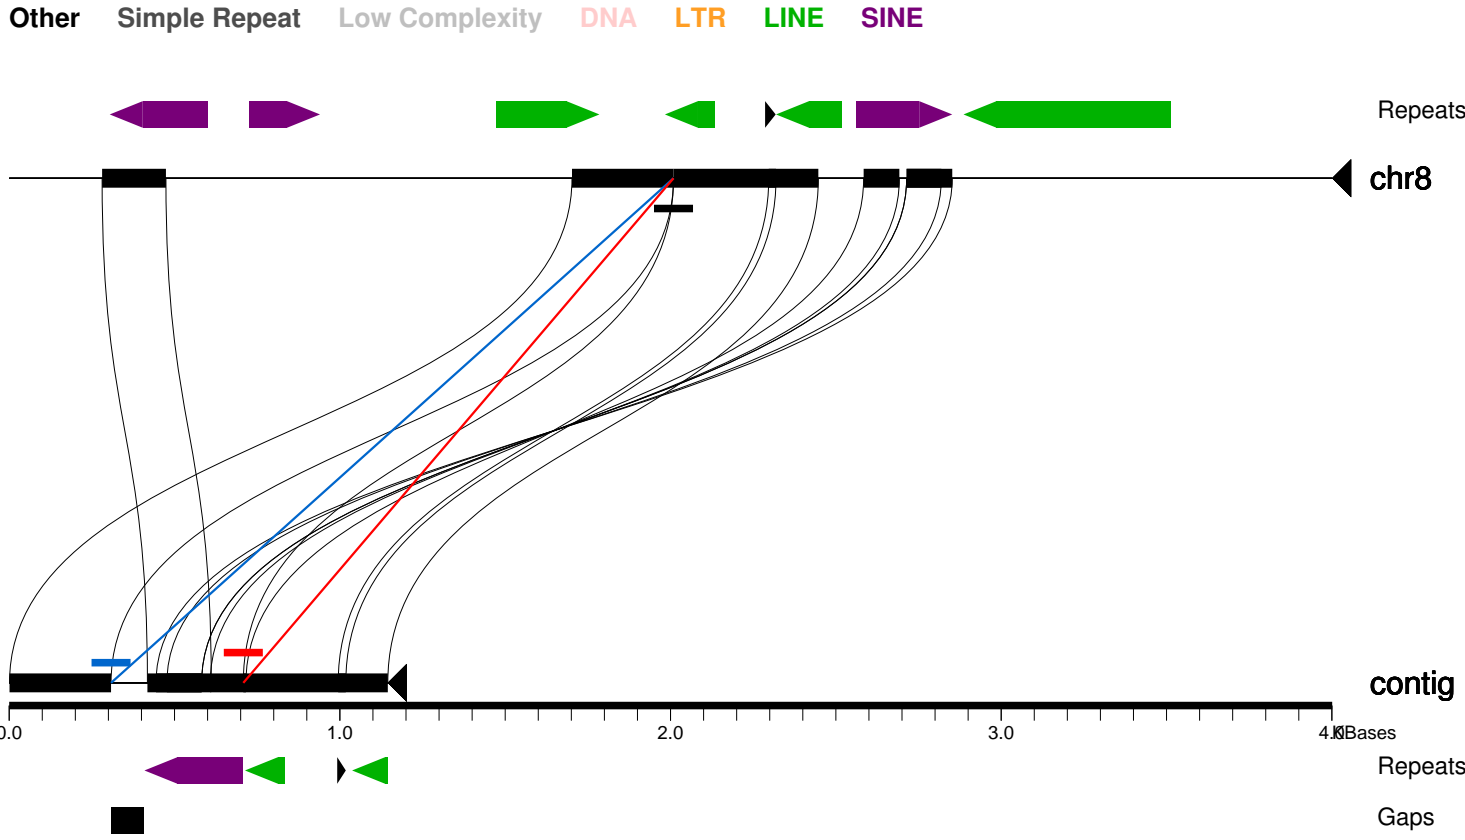

siteID: chr8\_110370871 Scafftig2 + Breakpoint: chr8:110370873

chr8:110370713-110371046

Overlap Length: 14 INS size: 272 Genotyped: Yes

```
left -----ATCAATCCCTTATCATTTTCTTATTGCTTTTAG--GTCAAGGGACCAATAAGTTTAA
chrom TGCAAGAATTTCTATCAATCCCTTATCATTTTCTTATTGCTTTTAG--GTCAAGGGACCAATAAGTTTAA
right -----GAATGGCG-TGAACCCGGGAAGCGGAGCTT---GCAGTGAGCCGAGATTGCGCCACTG-----
          2222NN2N1*1**1**111*11111111***111**11*1**11*11*11***1*11111111
```

```
left AACAGTCTCTTTTTTCACCATATGGGCCAGTAGAAC-AGACTACATAATTTGTGAGGTCTCATGCAAAA
chrom AACAGTCTCTTTTTTCACCATATGGGCCAGTAGAAC-AGACTACATAATTTGTGAGGTCTCATGCAAAA
right ---CAGTCCGCAGTCTGGCC---TGGGCGAC-AGAGCGAGACTCC-----GTCTCAAAAAAAAA
          111*****11111*1*11**111*****1*11***1*1*****1*111111111111*****111****
```

```
left TGAAAAGGGGAAGTCCCTTGCTCAAAAAATATTAAGG----CACTTTGGGAGGCCGAG-----GCG
chrom TGAAAAGGGGAAGTCCCTTGCTCAAAAAATATTAAGGATCCCAAGATGACAG-CAGAGTATTAACCGAG
right AAAAAAAAA--AA-----AATAATTAAGGATCCCAAGATGACAG-CAGAGTATTAACCGAG
          11****1111**111111111111*****2222**222*22*2*2***22222222*2*
```

```
left GGTGGATC--ATGAGGT----CAGGAGATCGAGACCATCCTGGC----TAACAAGGG-----AAACCC
chrom TATGGGCCCTATGAGATTGCACAGGTCACACTCACTATCCTGGCCCTTTAGGCAGGGTTTTGTTAGAGCT
right TATGGGCCCTATGAGATTGCACAGGTCACACTCACTATCCTGGCCCTTTAGGCAGGGTTTTGTTAGAGCT
          22***22*22*****2*2222****22*22222**2*****2222**222****2222222*2*2*2
```

```
left CGTCTCTACTAAAAATACAAAAAATTAGCCGGGCACGGTGG-CGGC-----
chrom AGATTTTTGAAAAACCTGCAAAAAGAAACGCGGGCTTTAATGATCAGGATTCTACTTTCA
right AGATTTTTGAAAAACCTGCAAAAAGAAACGCGGGCTTTAATGATCAGGATTC-----
          2*22*2*222***22*2*****2*222**2*222222**22*2**2222
```

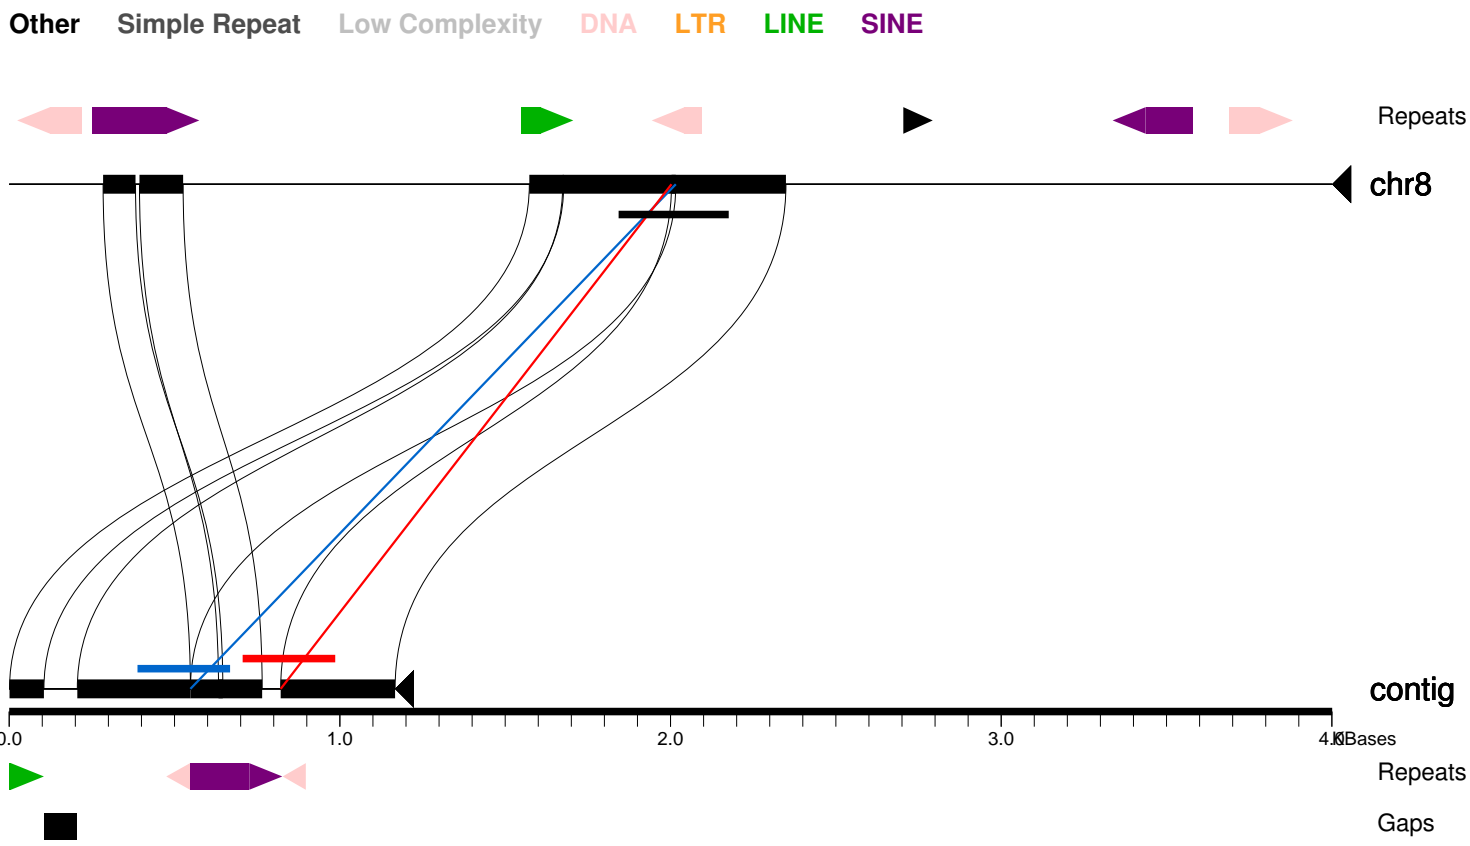



siteID: chr8\_114792908 Scafftig1 + Breakpoint: chr8:114792909  
 chr8:114792870-114792968  
 Overlap Length: 12 INS size: 416 Genotyped: No

```

left  ---TCCTCCTAAAAGTCAAAAAGTGATC---TATAAACATAATAT-----CCCAAGGTATA
chrom ---TCCTCCTAAAAGTCAAAAAGTGATC---TATAAACATAATAT-----CCCAAGGTATA
right CCGCCCGTCTCGGCCTCCCAAAGTGCTGGGATTACAGGCGTGAGCCACCGCGCCCGGCC*CCCAAGGTATA
      1111**11**11111**11*****1*11111**1*11*1*1*11111111111111111111*****
left  TATATATATTTNNNNNNNNNNNNNNNNNNNNNNNNNNNNNNNNNNNNNNNNNNNNNNNNNNNNNNNNNN
chrom TTTTATCTT-----CCATGTACACTGACTGGTTACTTACTTAGTAGCAAGTCTGTCA
right TTTTATCTT-----CCATGTACACTGACTGGTTACTTACTTAGTAGCAAGTCTGTCA
      *2*2***2**2222222222222222222222222222222222222222222222222222222
  
```

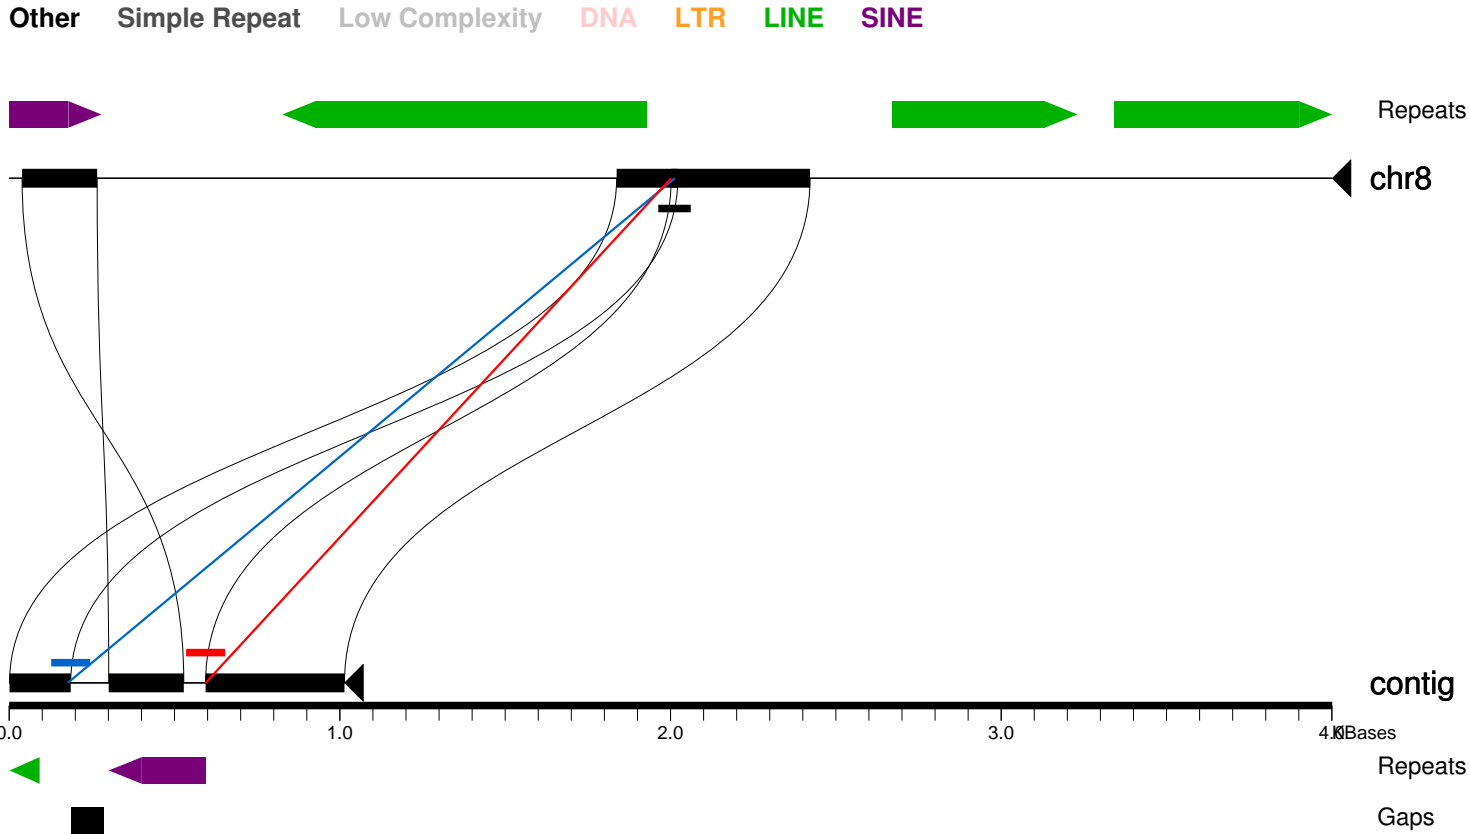

siteID: chr8\_117046755 Scaffitig8 - Breakpoint: chr8:117047006

chr8:117046960-117047062

Overlap Length: 14 INS size: 263 Genotyped: Yes

```
left  GAAAAC TATGGATACATTCTGTATTAGCTGTTCTCATGCT-----ACTAATAAAGACAT
chrom GAAAAC TATGGATACATTCTGTATTAGCTGTTCTCATGCT-----ACTAATAAAGACAT
right CACTGCACTCCAGCCTGGGCGACAGAGCGAAACTCCGTCTCAAAAAAAAAAAAAAAAAAAAAAA AAGACAT
      1*111*11*11*11*11*11111*1111***1111***111**111111111111111111*11**1*****
```

  

```
left  AACCAA TTGGGAGGCCGAGACGGGCGGATCACGAGGTCAGGAGATCGAGACCATCCTGGCTAACA-
chrom AACCAA-----GCC----TGGGTAATTTATAAAGGAAAGAGGTTTA----AT--TGACTCATAG
right AACCAA-----GCC----TGGGTAATTTATAAAGGAAAGAGGTTTA----AT--TGACTCATAG
      *****2222222***22222***2222*2*22*2*22*2***2*22*2222**22**2**2*2*2
```

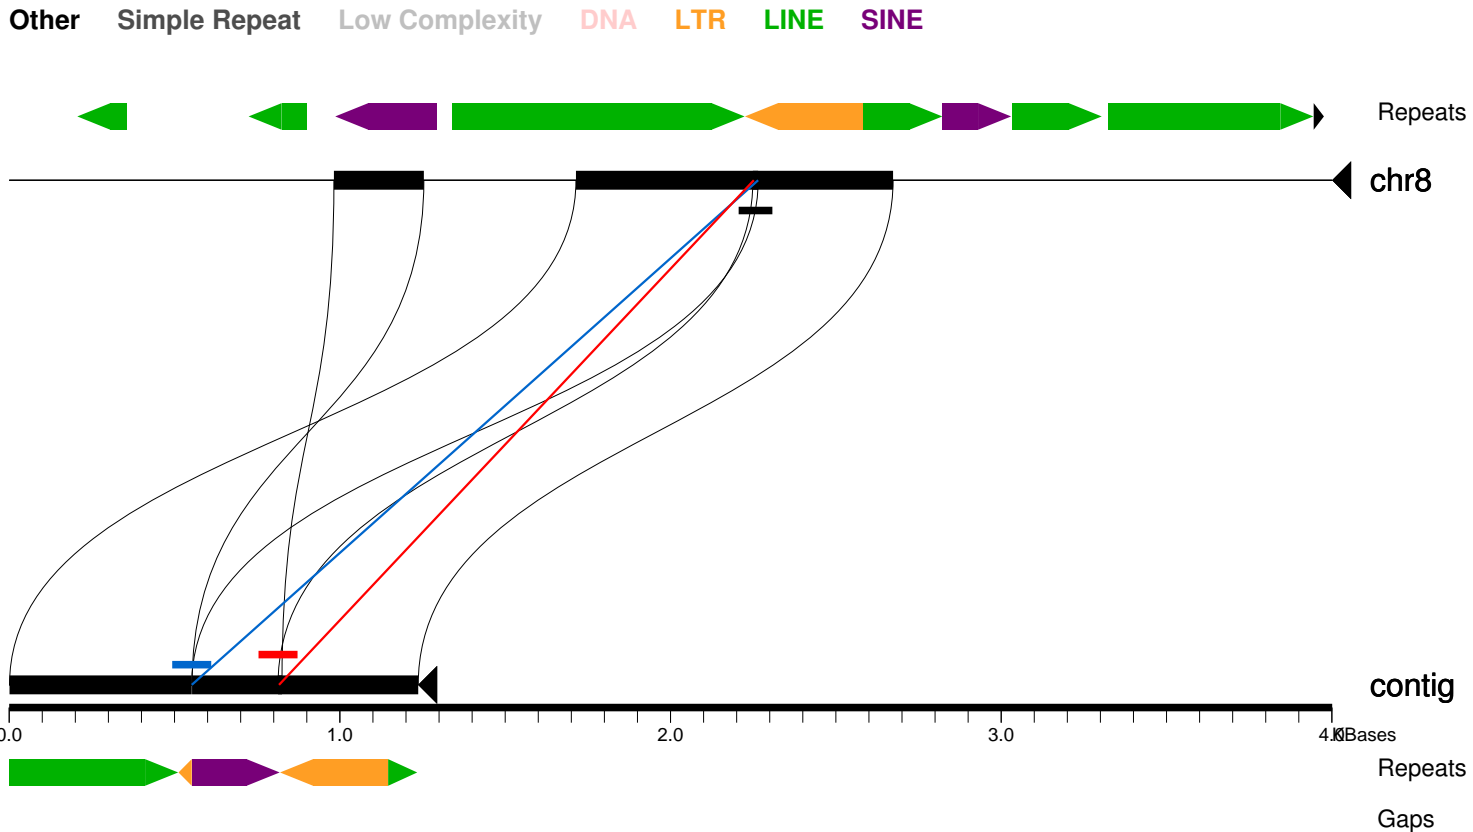



siteID: chr8\_120800789 Scaffold7 - Breakpoint: chr8:120800779

chr8:120800733-120800820

Overlap Length: 14 INS size: 221 Genotyped: Yes

```
left   A--CCAATAT-----GTATGCTTATGTGTACAGAGAAATATAAATC
chrom  A--CCAATAT-----GTATGCTTATGTGTACAGAGAAATATAAATC
right  GAGCCGAGATTGCGCCACTGCACTCCAGCCTGGGCGACAGCGAGACTCCGTCTCAAAAAAAAAAAAAAAAA
111**1*1**1111111111111111111111111111111111111*111*11*11**1*11*1*1***1*1***11
```

```
left   AAGATATAAAATATTACACAACCATCCTGGCTAACACGGGTGAAACCCCGTCTCTACTAAAAATACAAAA
chrom  AAGATATAAAATATTACACAACCATCCTGGCTAACACGGGTGAAACCCCGTCTCTACTAAAAATACAAAA
right  AAAAAAAAAAAATATTACACAA-----AA-----TGA-----GTATCTGG-----AGACCTAGA
**1*1*1*****2222222222**22222***222222**2***222222*2**22*2*
```

```
left   ATTAGCCGGG
chrom  --TAGGCA--
right  --TAGGCA--
22***2*222
```

Other Simple Repeat Low Complexity DNA LTR LINE SINE

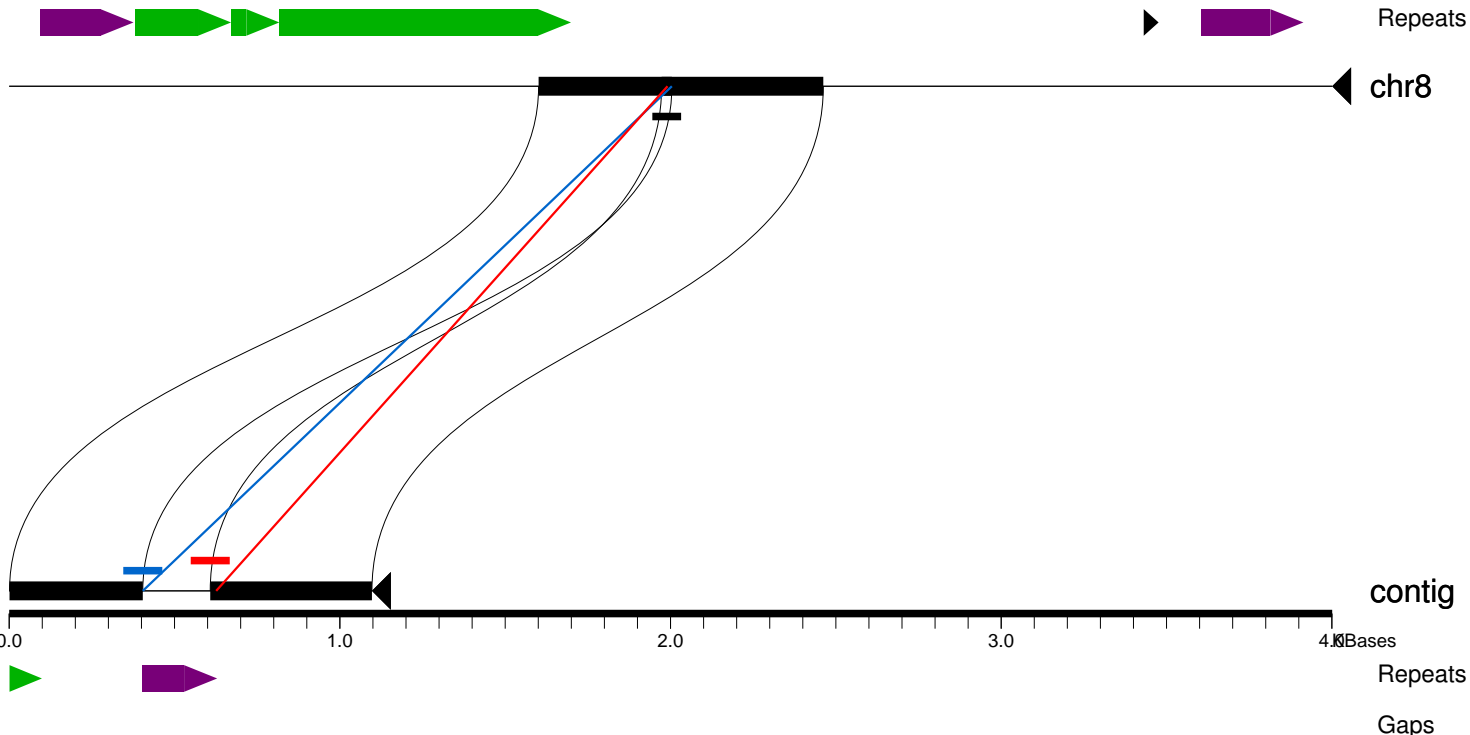



siteID: chr8\_122155288 Scafftig8 - Breakpoint: chr8:122155278

chr8:122155228-122155337

Overlap Length: 10 INS size: 306 Genotyped: Yes

```
left  G-CTAAAGATTAAACTCAATTATAAAATTT----TCCGG----AAAGGTTTTCACTTGTAAAAAATTTG
chrom G-CTAAAGATTAAACTCAATTATAAAATTT----TCCGG----AAAGGTTTTCACTTGTAAAAAATTTA
right GTCCGCAGTCCGACCTGGGCGACAGAGCGAGACTCCGTCTCAAAAAAAAAAAAAAAAAAAAAAATA
      *1*111**1111*1**11111*1*1*1111111****11111***1111111*111111*111111*111111*111111*
```

```
left  GCCGGGCGCAGTGGCTCACGCCTGTAATCCCAGCACTTTGGGAGGCCGAGGCGGGTGG
chrom TTTATGA-CACTTGTAAAGGTGGTAAGGC-AG-ATTTT---ATTCAAAGG---GTGT
right TTTATGA-CACTTGTAAAGGTGGTAAGGC-AG-ATTTT---ATTCAAAGG---GTGT
      22222*22**2*2*2*2*2*222****22*2**2*2**2**222*22*22***222***2
```

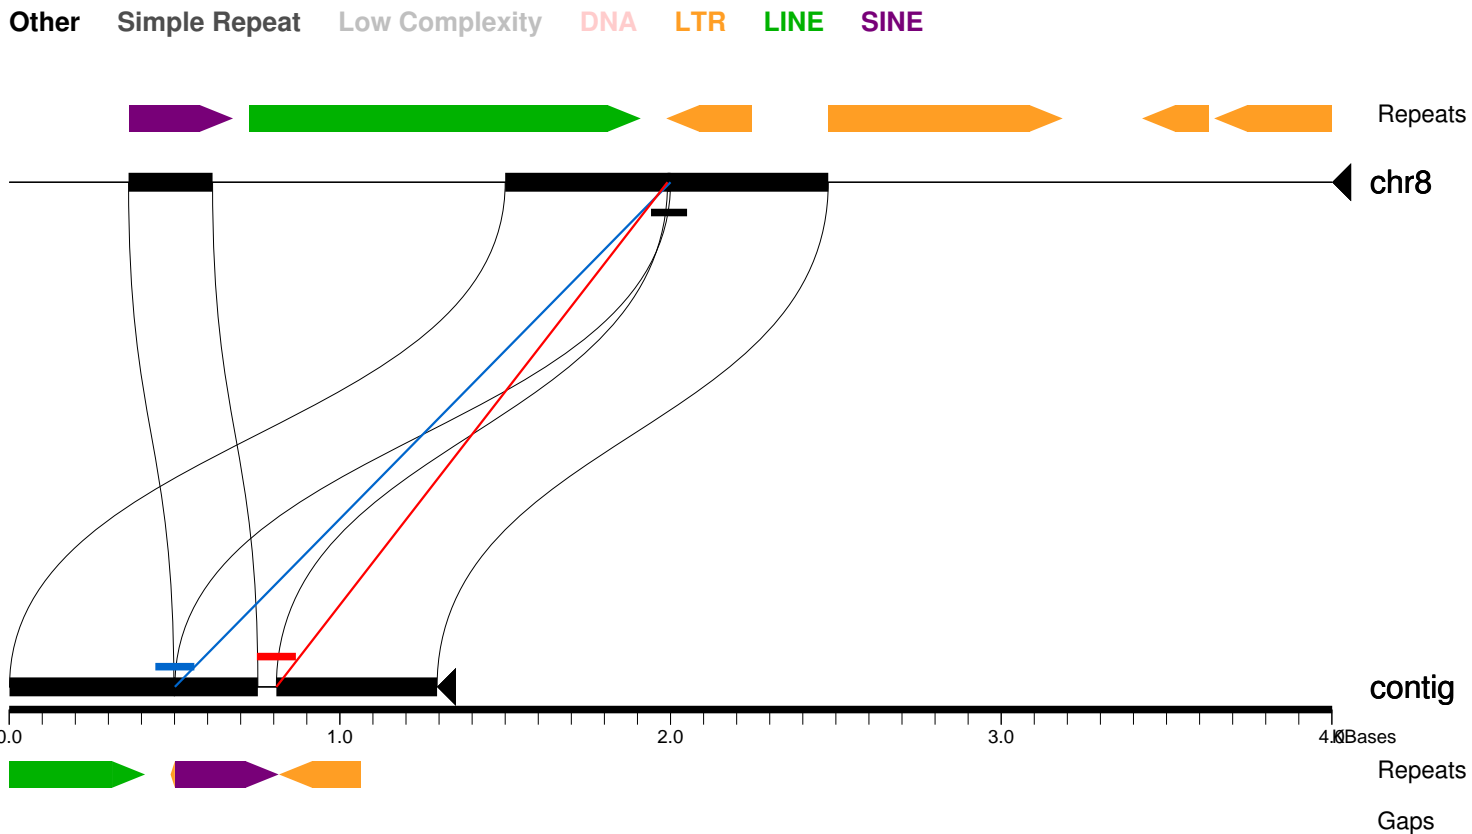

siteID: chr8\_122541986 Scafftig1 + Breakpoint: chr8:122541998

chr8:122541955-122542057

Overlap Length: 17 INS size: 459 Genotyped: No

```
left  G--GACTCCCTCAG-----AATTTCTG--ATCA-----GTGCGTCTTTTGTGGAGCTCAAGAATTTGC
chrom G--GACTCCCTCAG-----AATTTCTG--ATCA-----GTGCGTCTTTTGTGGAGCTCAAGAATTTGC
right TCCGCCCGCCTCGGCCTCCCAAAGTGCTGGGATTACAGGCGTGAGCCACCGCGCCCGGC CAAGAATTTGC
      111*1*11****1*11111111**1*1***11**1*11111***1*1*111111111*11*****
```

```
left  ATTTCTTTNNNNNNNNNNNNNNNNNNNNNNNNNNNNNNNNNNNNNNNNNNNNNNNNNNNNNNNNNNNNNNNN
chrom ATTTCTAATACATTTCCAAGTAATTTCTGCTAGTCCAGCATTGCCCTGAG-----
right ATTTCTAATACATTTCCAAGTAATTTCTGCTAGTCCAGCATTGCTCTGAG-----
      *****22*22222222222222222222222222222222222N22222222222222222222
```

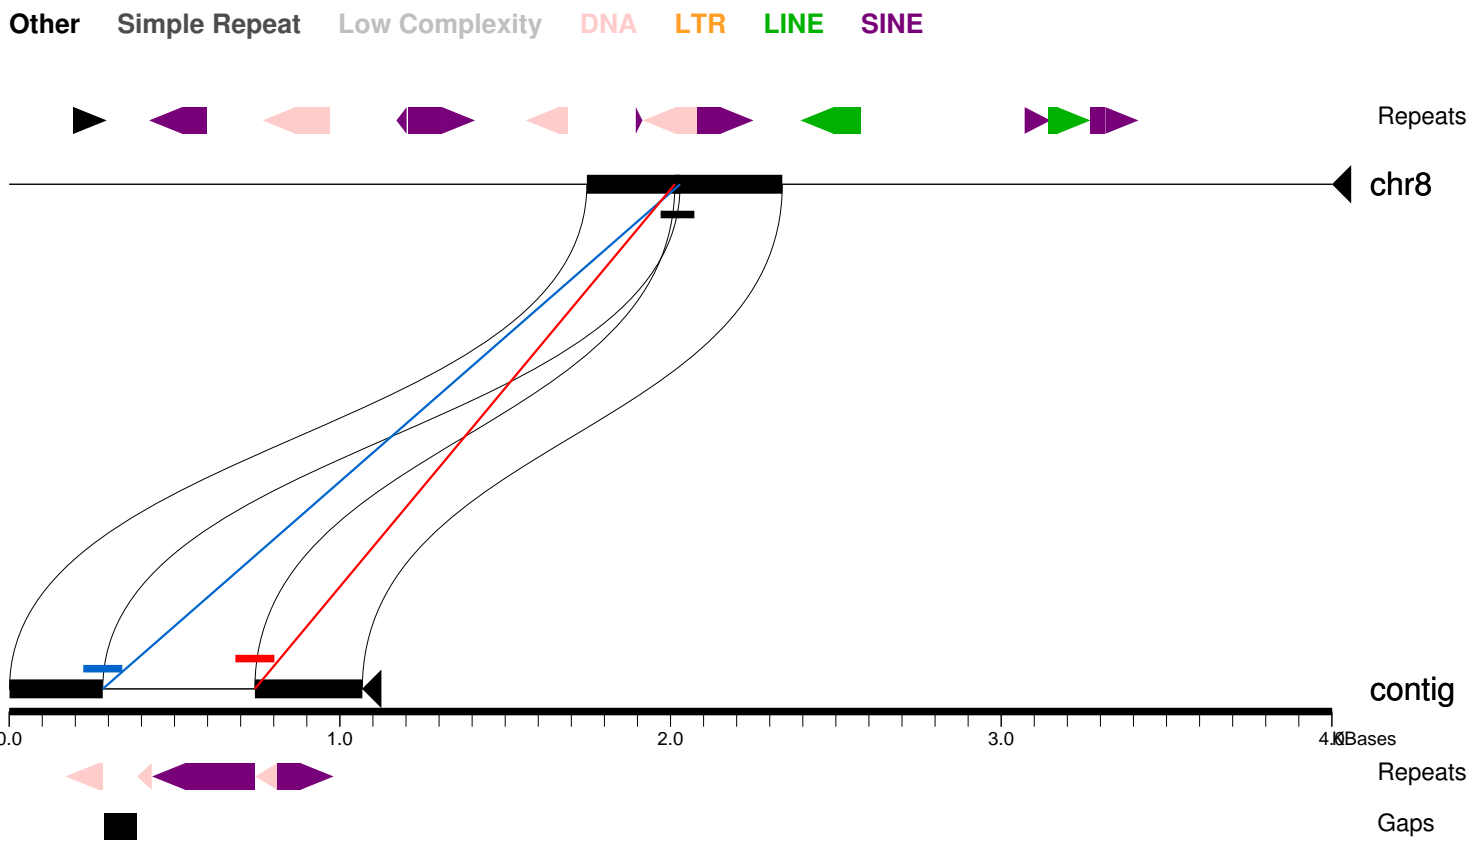

siteID: chr8\_122731019 Scafftig1 - Breakpoint: chr8:122731008

chr8:122730848-122731180

Overlap Length: 13 INS size: 312 Genotyped: Yes

left -----TGATGCAATACTGGGCAAGTCACGTCACTCTCAGATTCATTCCTCTCTCTCTCTGA  
chrom CAT-GTGGCCATGATGCAATACTGGGCAAGTCACGTCACTCTCAGATTCATTCCTCTCTCTCTCTGA  
right TTTAGTAGAGACGGGGTTTCACCTTGTTAGCCAGGATGGTCTC-GAT-----CTCCTGACCTC-----  
NN2122N2NN21\*11\*1111\*\*111\*11\*\*1\*\*1\*1111\*\*\*\*1\*\*\*1111111\*\*\*\*11\*1\*\*11111

left AAACTGATGAGGGCAGACTAAATAATCCTTT-CCTTTCAAGGTTTAAGATCTTTTTATCCCCTGAATGGG  
chrom AAACTGATGAGGGCAGACTAAATAATCCTTT-CCTTTCAAGGTTTAAGATCTTTTTATCCCCTGAATGGG  
right -----ATGA-----TCCACCCGCTCGGCCCTCCCAAAGT----GCTGGGATTA---CAGGCGTGAG  
111111\*\*\*\*111111111\*11\*1111\*\*111\*\*11\*\*11\*\*1\*\*1111\*1\*1111\*\*111\*11\*11\*\*1\*

left ATGTTTTGTCAAAGAGCTTCTTCCATCTTGTCTTTTTTTTTTTTTTTTTTTTTTTTTTTTTTT-----T  
chrom ATGTTTTGTCAAAGAGCTTCTTCCATCTTGTCTTTAAGAGTAACTTTTTATAAGCTATGCCCTGGCAAGT  
right C-----CACCGCGCCCGCCCATCTTGTCTTTAAGAGTAACTTTTTATAAGCTATGCCCTGGCAAGT  
1111111111\*\*11\*1\*\*11111\*\*\*\*\*22222\*222\*\*\*\*\*2\*2222\*2\*22222222222\*

left GAGA--CGGA--GTCTCGCTCTGTGCGCC--AGGCCGACTGC-----GGACTGCA-----GTGGC  
chrom GAGAAACTGAAAGACAGGATTAGCAGTACTAAGACCAAAGTGGTTTTATGGGCTTTAAAAAATACTGTTGC  
right GAGAAACTGAAAGACAGGATTAGCAGTACTAAGACCAAAGTGGTTTTATGGGCTTTAAAAAATACTGTTGC  
\*\*\*\*22\*2\*\*22\*2\*22\*2\*22\*22\*22\*22\*22\*\*2\*\*22\*2\*\*22222\*2\*\*22\*222222222\*2\*\*

left GCA--AT-CTCGGCTCACTG--CAAGCTCCGCT-----TCCCGGTTTCACGCC  
chrom TCAGGATGCTTTATTCATAGAGCAAAATCTAATGATGAACTCAGCATTTCCATTG  
right TCAGGATGCTTTATTCATAGAGCAAAATCTAATGATGAACTCA-----  
2\*22\*2\*\*2222\*\*22\*22\*\*22\*222\*222222\*2NNNN111NNNN

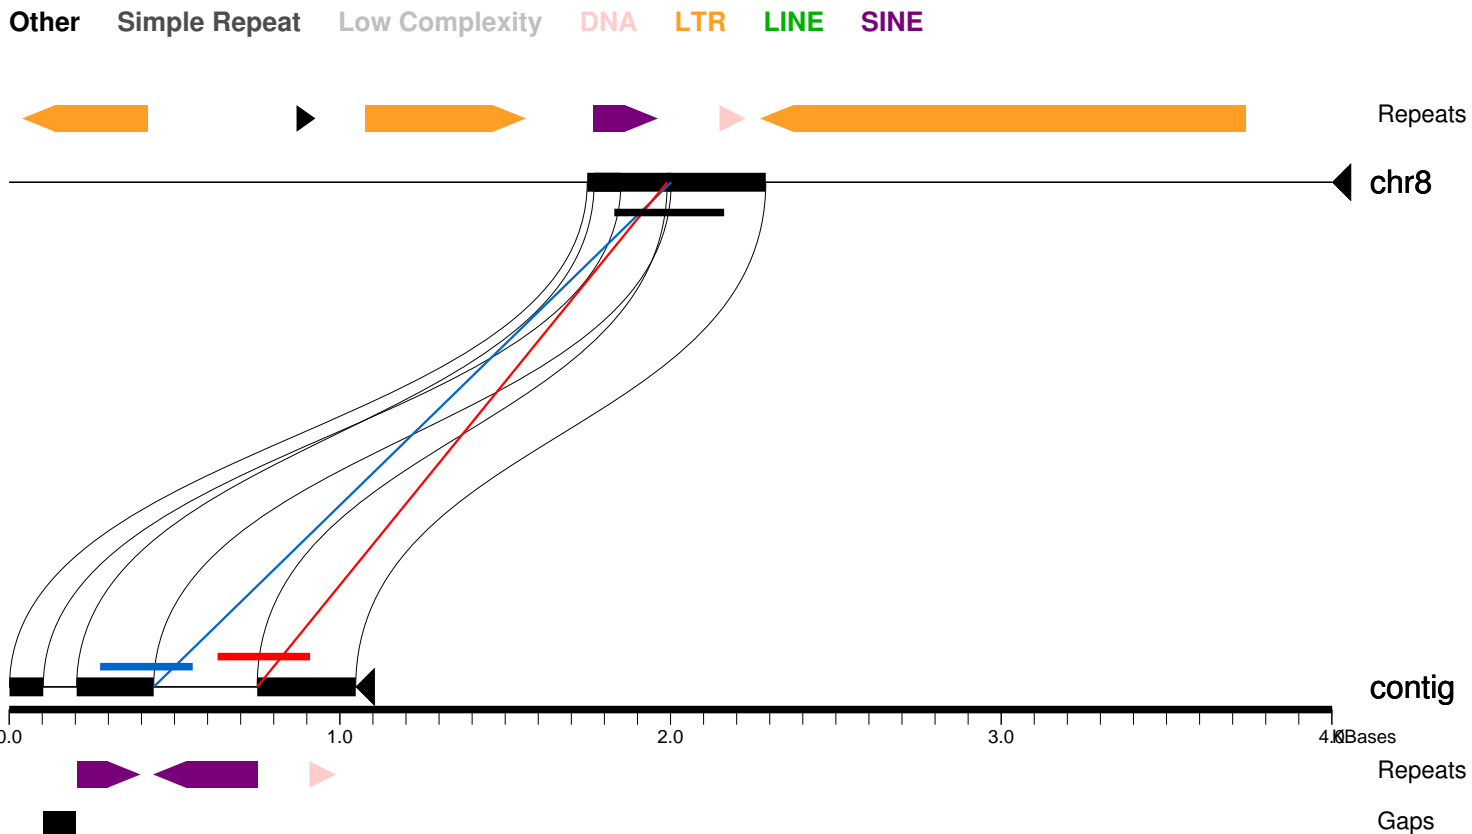





siteID: chr8\_125889977 Scafftig13 - Breakpoint: chr8:125889958

chr8:125889911-125890017

Overlap Length: 10 INS size: 274 Genotyped: Yes

```

left  ---AATTATCTTCTTTTGAGGAT-TATTCAGCCTCTTGCTTCT-CCTTCCAT-----TTCTTCTGAT
chrom ---AATTATCTTCTTTTGAGGAT-TATTCAGCCTCTTGCTTCT-CCTTCCAT-----TTCTTCTGAT
right CGGGATGGTCTCGATCTCCTGACCTCGTGATCCGCCTGCTCGGCCTCCC AAAAGTGCTGTTCTTCTGATC
      1111**11***111*1*111**11*11*1*1**1*1***1**11***1***111111111*****2

```

```

left  TTTTTTTTTTTTTTTTTTTTTTTTTTCTGAGATGGAGTCTCGCTCTGTGCGCCAGGCTGGAGTGCA
chrom TTATAGACATTTTCATAGCTT---GAGA--GAATCA-----TTTAAGAGGAAAAGGAAGCA
right TTATAGACATTTTCATAGCTT---GAGA--GAATCA-----TTTAAGAGGAAAAGGAAGCA
      **2*22222***22*222**222*****22**2**22222222*22222***222*222***

```

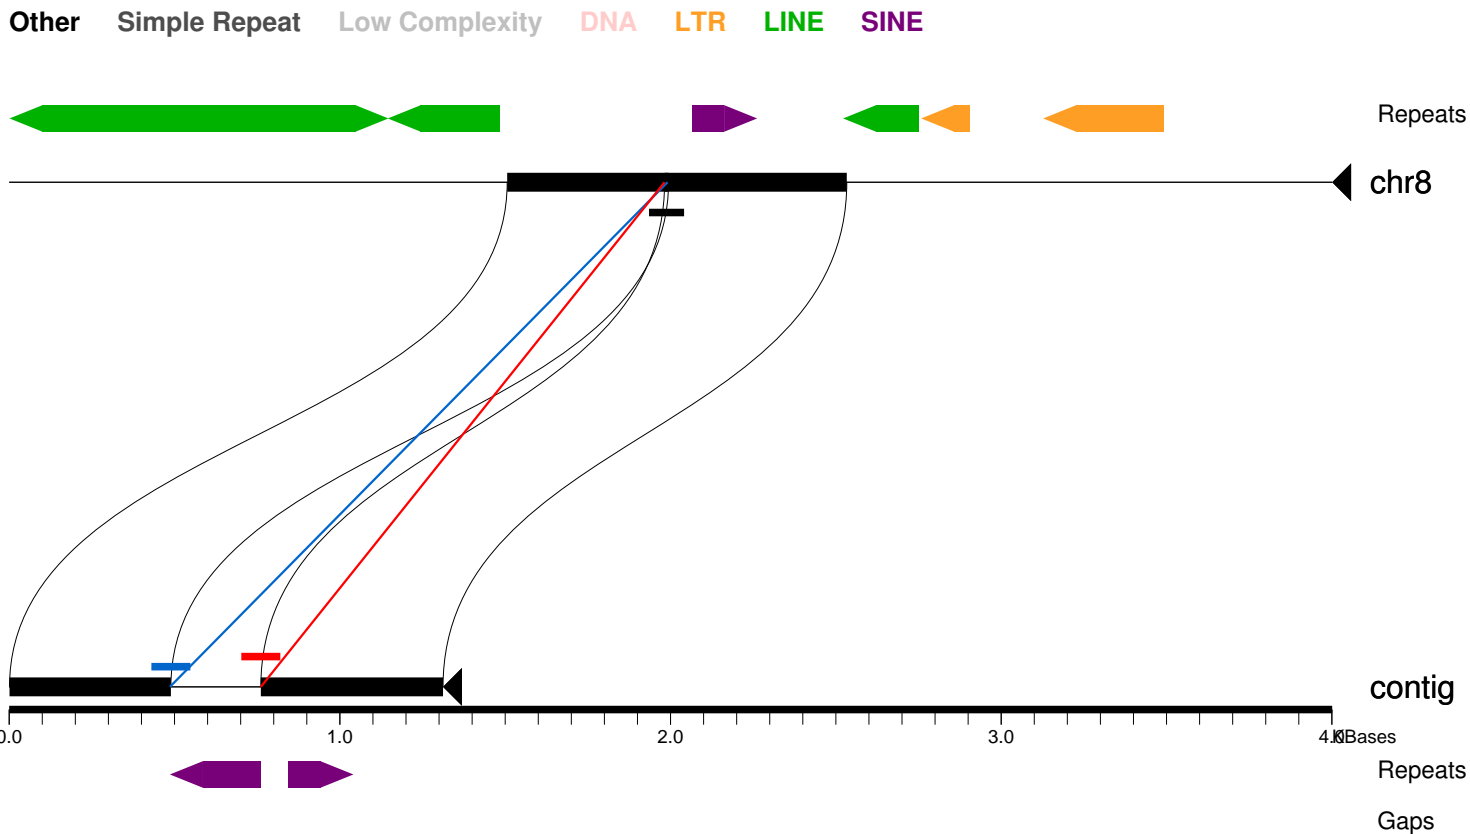

siteID: chr8\_126024122 Scafftig8 + Breakpoint: chr8:126024104

chr8:126024060-126024163

Overlap Length: 8 INS size: 334 Genotyped: Yes

```
left  -----GTGCT-----AGT-CAGGGAAACAACAGGTAAAAAACTGACCTTGACCTAGAGAAGGCCT
chrom -----GTGCT-----AGT-CAGGGAAACAACAGGTAAAAAACTGACCTTGACCTAGAGAAGGCCT
right CGCCCGCCTCGGCCTCCCAAAGTGCTGGGATTACAGGCGTGAGCCACCGCGCCCGGCC--GAGAAGGCAA
      111111111111*11**11111***1*1****1111*111**1*111**1*11*11*1**11*****22
```

```
left  TTTTCTTTTTTCTTTTTTTTTTTTTTTTTTTTTTTTTTTTTTTTTTTTTTTTTTTTTTGGAGACGGAGTCTCGCT
chrom TTTTCTACTTAGGAATGTAGACAGATAATTTTACA-----ACACTGTTGATAAAT
right TTTTCTACTTAGGAATGTAGACAGATAATTTTACA-----ACACTGTTGATAAAT
      *****22**22222*2*222222*22*****222222222222222222*2**2*2222*222*
```

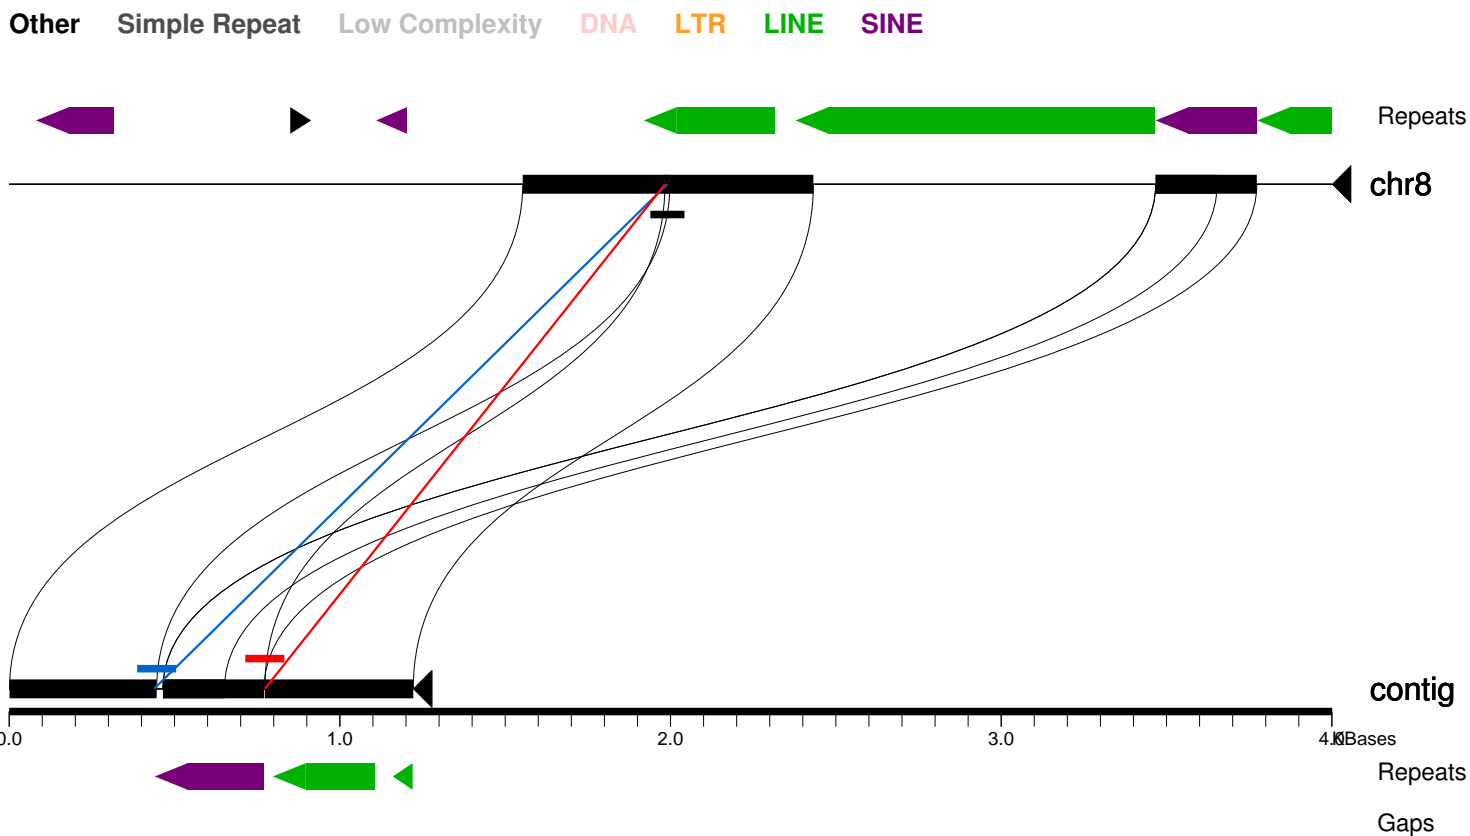

siteID: chr8\_127865480 Scafftig4 - Breakpoint: chr8:127865467

chr8:127865420-127865521

Overlap Length: 13 INS size: 279 Genotyped: Yes

```
left  CAACTTTAAATTGGAAGAAAGGATCAGA----GTCTCATTTACT-----AACATAAAAA
chrom CAACTTTAAATTGGAAGAAAGGATCAGA----GTCTCATTTACT-----AACATAAAAA
right CA-CTCCAGCCTGGGCGACAGAGCGAGACTCCGTCTCAAAAAAAAAAAAAAAAAAAAAAAAAAAAAAA
**1**11*111***11**1**1111***1111*****111*1*1111111111111111**1*1*****
```

```
left  ACAATGTAATTGGGAGGCCGAGGCGGGCGGATCACGAGGTCAGGAGATCGAGACCATCCCGGCTAAAA
chrom ACAATGTAAT---ATGTCATGTCTCC---AACA-GACGTTTGTTCATTAA-----CTGGTTC---
right ACAATGTAAT---ATGTCATGTCTCC---AACA-GACGTTTGTTCATTAA-----CTGGTTC---
*****2*222*2*2*22*2*222222*2**2**2**22*222**22*2222222*2**2*2222
```

Other Simple Repeat Low Complexity DNA LTR LINE SINE

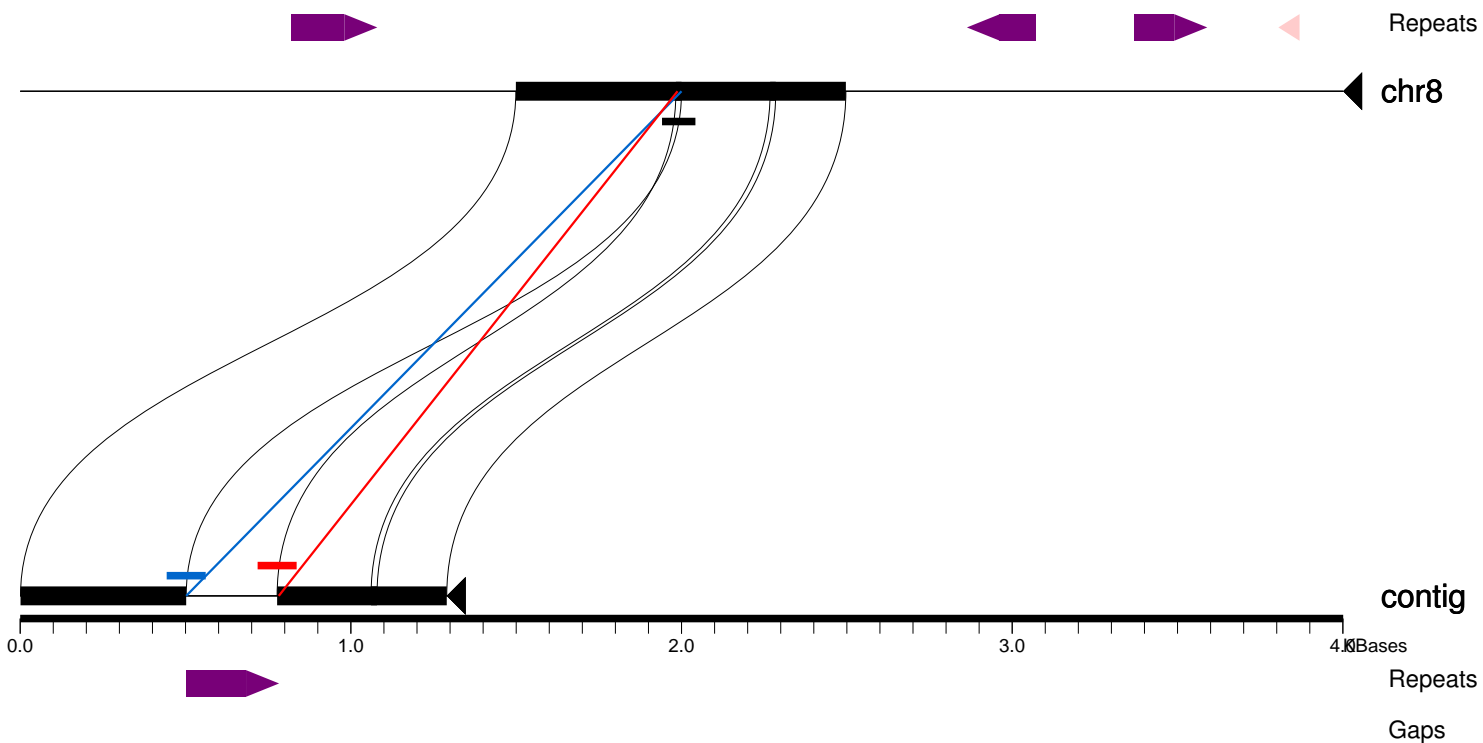



siteID: chr8\_128038109 Scafftig1 - Breakpoint: chr8:128038124

chr8:128037964-128038284

Overlap Length: 1 INS size: 324 Genotyped: Yes

left T-GCTTTTTGTATAACAGCATTAGAAAACCTAGTACAGATTCTGATAGCTAGAAGTGGGGTGCTGCAGTA  
chrom TTTGCTTTTTGTATAACAGCATTAGAAAACCTAGTACAGATTCTGATAGCTAGAAGTGGGGTGCTGCAGTA  
right C-----GTGAACCCGG-----GAAGCGGAGCT----TGCAGTGAGCCGAGATTGCGCCACTGCAGTC  
1 11111111\*\*1\*111\*1\*11111\*\*\*1\*11\*\*111111\*1\*1\*11\*\*\*1111\*1\*\*1\*111\*\*\*\*\*1

left ACAAATAACTAAAAATGTGAATGTGTCTTTTGAATTGGCCAAGGGGCAGGGGCTGGAAGAATTTTGAGTA  
chrom ACAAATAACTAAAAATGTGAATGTGTCTTTTGAATTGGCCAAGGGGCAGGGGCTGGAAGAATTTTGAGTA  
right CGCAGTCCG-----GCCTGGGCGACAGAGCGAGACTCCGTCTCAAAAAAAAAAAAAAAAAAAAAA  
111\*1\*11111111111111111111\*1\*\*11\*11\*11\*11\*1\*\*111\*1\*111\*111\*\*1\*\*11111\*11\*

left GCATGTTAGAAAAAGCTTAGAGGC-CGGGCGCGG-----TGGCTCACGCCTGTAATCC-----CAGCAC  
chrom GCATGTTAGAAAAAGCTTAGATTCTCTTGAACAGACTGTTAGTAGAAAATATGGAGTTAACGATTCTGCTA  
right AAAAAAAAAAAAAAAAAAAAAA-A\*TTTCTTGAAGGACTGTTAGTAGAAAATATGGAGTTAACGATTCTGCTA  
11\*11111\*1\*\*\*\*\*1111\*1\*2212\*22\*2212\*22222\*2\*222\*2222\*\*2\*2\*22222222\*2\*\*22

left TTTGGGAGGCCGAGGCGGGTGGATCATGAGGTCAGGAG-ATCGAGACCATCCT---GGCTAACAG---G  
chrom ATGAGGACTCAGAAGAAAAGTGAAGGACACAGTAAAAAATATATGTGTTCATTTTATAGACTACCTAAATTG  
right ATGAGGACTCAGAAGAAAAGTGAAGGACACAGTAAAAAATATATGTGTTCATTTTATAGACTACCTAAATTG  
2\*22\*\*\*22\*2\*\*2\*222\*\*\*2\*22\*2222\*\*2\*22\*22\*\*222222\*\*\*22\*222\*2\*\*\*2\*2\*2222\*

left TGAAACCCCGTCTCT-----ACTAAA-----  
chrom TCATATGTAGACTGTTGGTAGAAAATATGAATATTTAAAGGCA  
right TCATATGTAGACTGTTGGTAGAAAATATGAATATT-----  
\*2\*2\*2222\*2\*\*2\*222222222222222\*2\*111

Other Simple Repeat Low Complexity DNA LTR LINE SINE

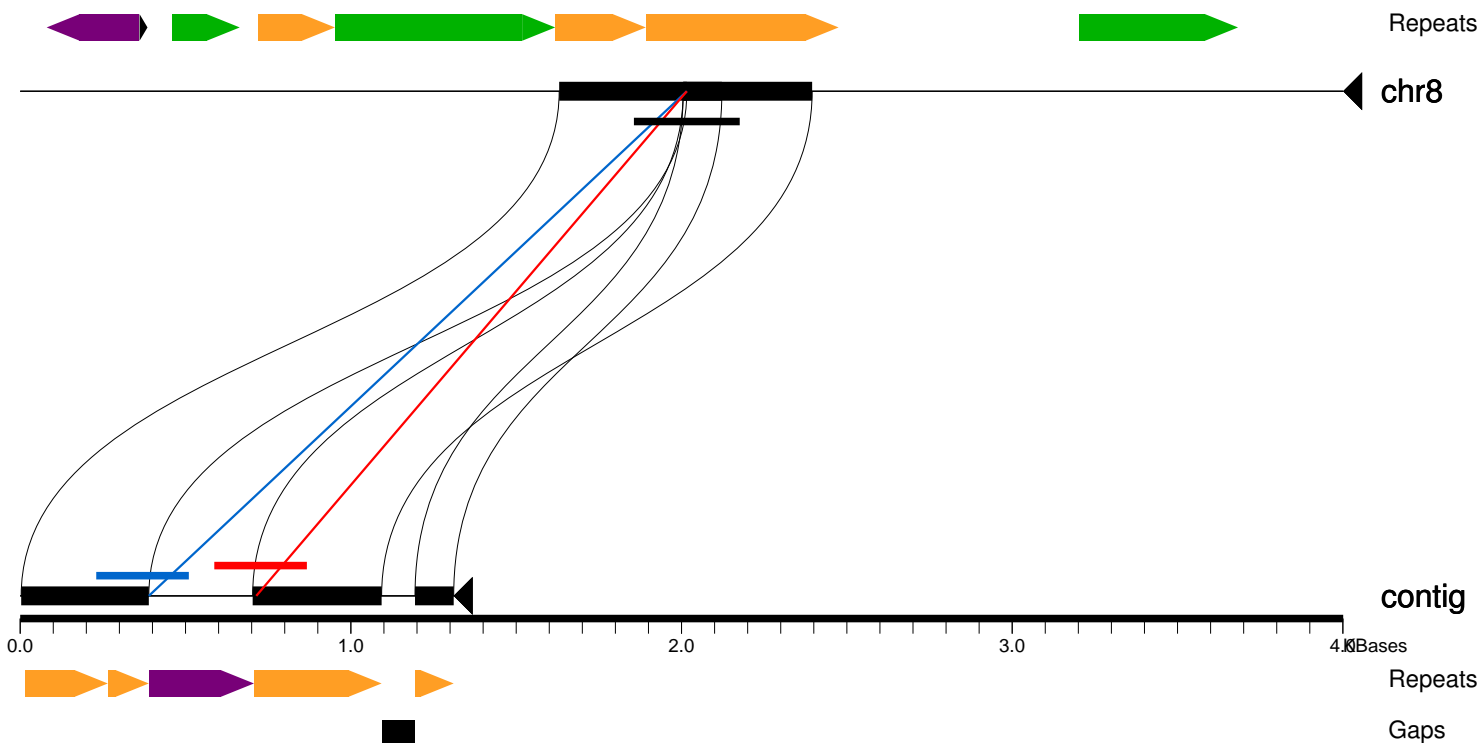

siteID: chr8\_128356671 Scafftig2 - Breakpoint: chr8:128356653

chr8:128356608-128356712

Overlap Length: 15 INS size: 161 Genotyped: Yes

```
left      TGACT---TTTCCATCTTTACAATCTTCTTTCACTTTGTAGATGCATT-----AAAAATTGCCT
chrom     TGACT---TTTCCATCTTTACAATCTTCTTTCACTTTGTAGATGCATT-----A AAAATTGCCT
right    AGACTCCGTCTCAAAAAAAAAAAAAAAAAAAAAAAAAAAAAAAAAAAAAAAAAAAAAAAAAAAAAAA
1****111*1**1*11111*1**111111111*111111*1*111*1111111111111*****
left      GGCTGGGAGGCTGAGGC-AGGAGAATGGCGT-GAACCCGGAAGCGGAGCTTGCAGTGAGCCGAG
chrom     GGCTAA----CTGATGTGAGTAATATGTCATTGAGCCC---AAG-----GCCATGGGGA-AT
right    GGCTAA----TTGATGTGAGTAATATGTCATTGAGCCC---AAG-----GCCATGGGGA-AT
***2222221***2*22*2*22***2*2*2**2***222***22222222**22*2*222*2
```

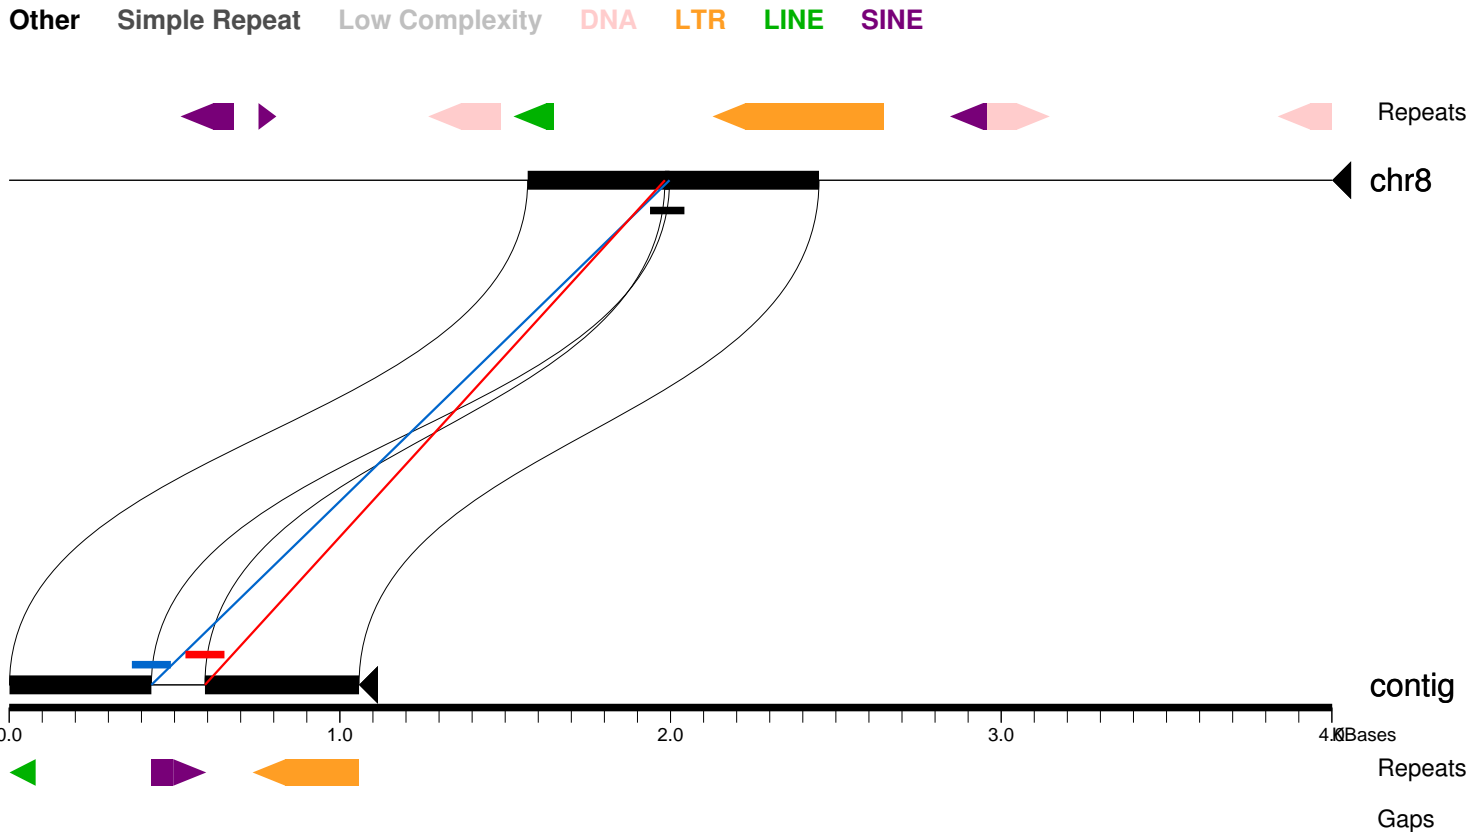







siteID: chr8\_132139147 Scafftig1 - Breakpoint: chr8:132139145

chr8:132138985-132139312

Overlap Length: 8 INS size: 312 Genotyped: Yes

```
left      C-----ACCTCCTTATTCC-ACCTTAGTGTGTGCTAAGCTTTTGCTTTCTATGAACATGACTATC
chrom     CCAATGAC--CACCTCCTTATTCC-ACCTTAGTGTGTGCTAAGCTTTTGCTTTCTATGAACATGACTATC
right     AGAATGGCGTGAACCCGGAAGGCGAGCTTGCAGTGAGCGGAGATCGTGCC-----ACAGCACTCTC
          1N2222N211N*1*1*111*11*11*1***111***1**11**1*11***111111111***11***1**
```

```
left      CTCCTTTCGAACTTTATACTCCTGTAGTTCCAAGCTTCTTCTTGTFTTCCCAACACTCTTTGTTCCTTTTAT
chrom     CTCCTTTCGAACTTTATACTCCTGTAGTTCCAAGCTTCTTCTTGTFTTCCCAACACTCTTTGTTCCTTTTAT
right     GCCTGGGCGAC-----AGAGCGAGACTCCGTCT-----CAAAAAAAAAATAAAAAATAA
          11*1111***1111111111111111***11*1*11**1*1***1111111***1*111111111111***1
```

```
left      GTGTCAGGGAAATAAGAGTCATTAAGAAGTTGGCCGGGC-GCGGTGGC----TCACGCCTGTA-----
chrom     GTGTCAGGGAAATAAGAGTCATTAGAAGTTTAAATCAATGAGGTGATATAGTCAGATTTGCATTTTTTGA
right     AAAAAAAAAAAAAAAAAAAAAAAAAAAGAAGTTTAAATCAATGAGGTGATATAGTCAGATTTGCATTTTTGA
          111111*1111*****1*111*11*1*****222222222*2***222222***2222*2*2222222
```

```
left      ---ATCCAG--CACTTTGGGAGGCC--GAGCGGGCGG---ATCAC---GAGGTC-----AGG
chrom     AAGATGGCAGGCCATTTTGGAAAGAGCAGGAGACCAGCTGGAAAACCACAGAGAGGCTGAGCACAAAATAGC
right     AAGATGGCAGGCCATTTTGGAAAGAGCAGGAGACCAGCTGGAAAACCACAGAGAGGCTGAGCACAAAATAGC
          222**22***22**2*****2**22*22***2*22**2*222*2***222*****2222222222**2
```

```
left      AGATCGAGACCACGGTGA---AACCCGTCTCTACTAAAAATACAAAAAT
chrom     AGATGTAGGATGGAGAGACAGAAAACCTTTTGTAGCGGCAGAAAATGATAGTT
right     AGATGTAGGATGGAGAGACAGAAAACCTTTT-----
          ***22*222222*2**222*2**22*21NNNNNN1N11NNNN1N1NN1
```

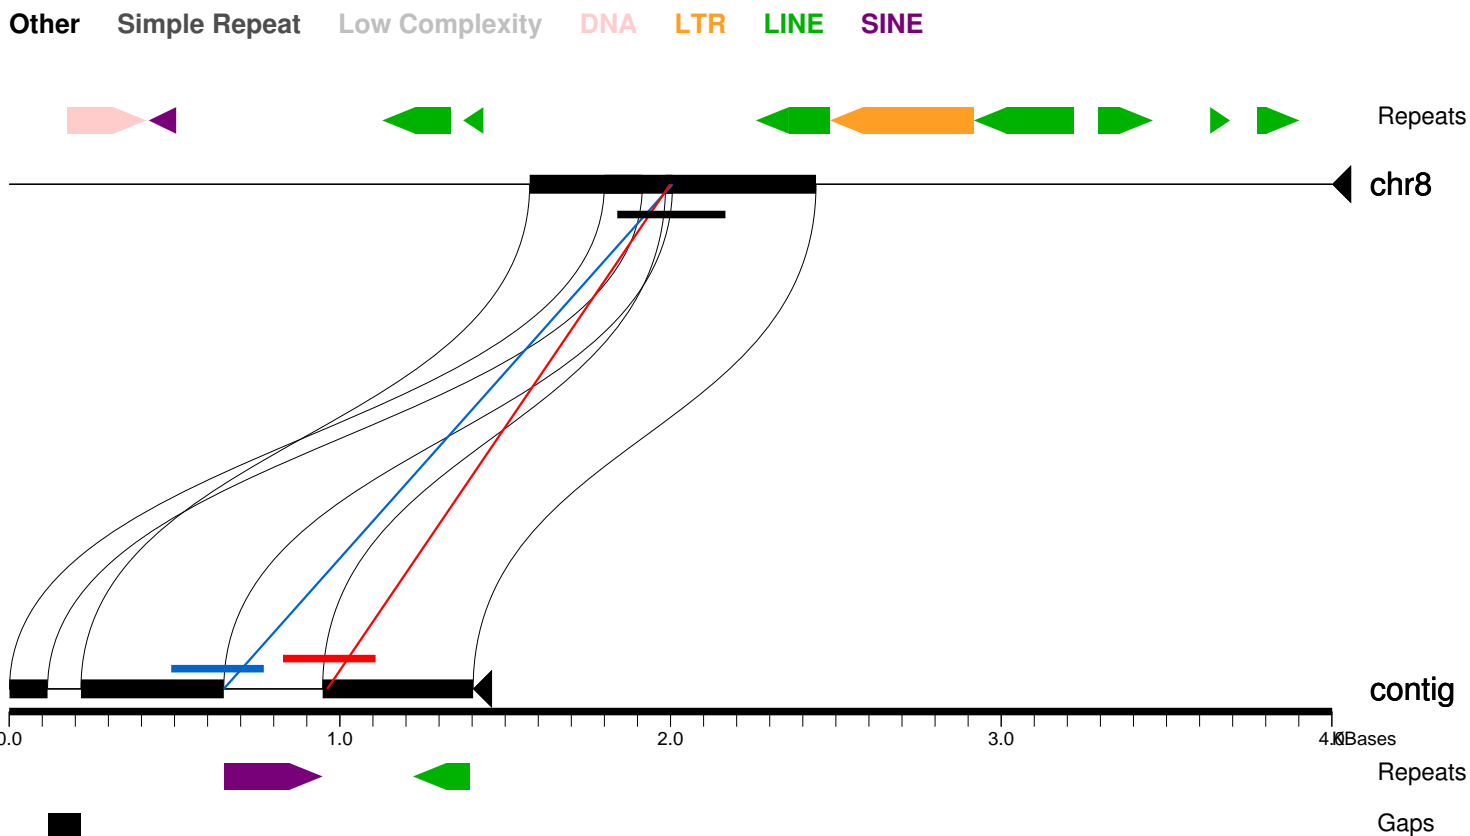



siteID: chr8\_137062186 Scaffoldig1 - Breakpoint: chr8:137062192

chr8:137062146-137062251

Overlap Length: 14 INS size: 304 Genotyped: Yes

```

left  G--GTGCTTCCTTCCC-----CTTTGTCTTCCACCATGATTGTAAGCTTCCTTAAACCTCCCC
chrom G--GTGCTTCCTTCCC-----CTTTGTCTTCCACCATGATTGTAAGCTTCCTTAAACCTCCCC
right GCACTCCAGCCTGGGCAAAAAGAGCGAGACTCTGTCTCAAAAAAAAAAAAAAAAAAAAAAAAAAAACCCCTCCC
      *111*1*11***111*1111111111111**1*****111*11*11*1111**111111111*1****1****
left  AGCCGGCCGGGCGCGGTGGCTCACGCCTGTAATCCACGACTTTGGGAGGCCGAGGCAGGCGG
chrom AGCCCTGCAGAA-CTGTGAGCCAA---TTAAACCTCTTTCCTTTATAA-----ATTACC
right -GCCCTGCAGAA-CTGTGAGCCAA---TTAAACCTCTTTCCTTTATAA-----ATTACC
      1**222*2*222*2***222**2222*22**2*2*2222****222*222222222*22222

```

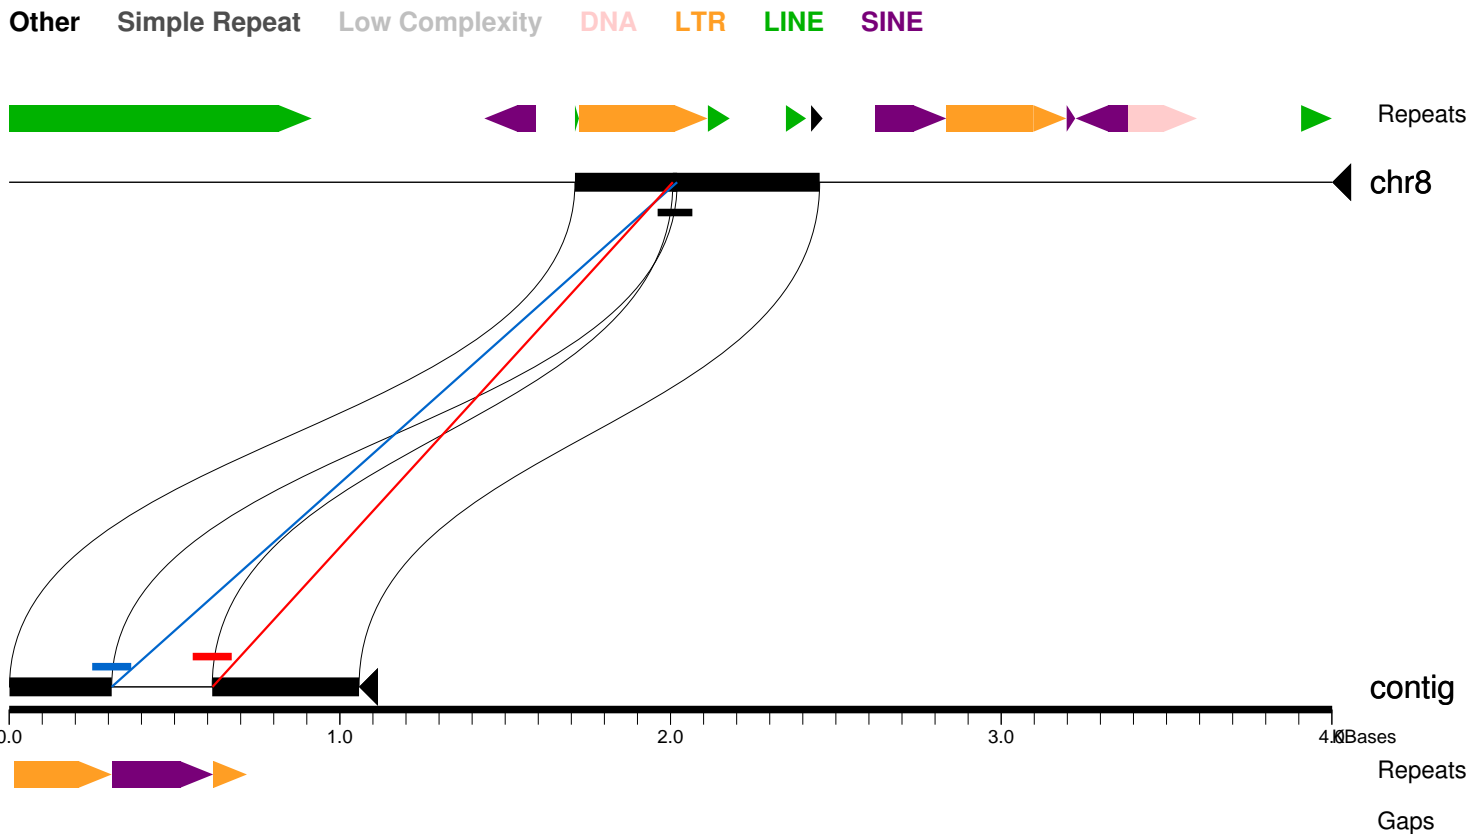



siteID: chr8\_138295140 Scafftig6 - Breakpoint: chr8:138295184

chr8:138295072-138295243

Overlap Length: 12 INS size: 305 Genotyped: Yes

```

left  AGGAACCACTTCCAGCTTCTTCTTTCTCTACCGCCTATACTCGCTGAGGCACCATCCTTGGCCCATGCC
chrom AGGAACCATTTCCAGCTTCTTCTTTCACTACCGCCTATACTCGCTCAGGCACCATCGTTG-----
right -----CCGC-----CCGCCTCGGC---CTC-----CCAAAGTG-----
111111111N111*1**111111111N111*****111*111**211111***112*112222222222
    
```

```

left  TACTCTTACTTCCAGTGCTGGTGCTAGAGTGCTCCCTTCCAGGAAGTAGCAGGAACTGAAGGTATTGTT---
chrom -ACTCTTACTTCCAGTGCTGGTGCTAGAGTGCTCCCTTCCAGGAAGTAGCAGAAACTGAAGGTATTGATAGA
right --CTGGGATTACAG-GCGTGAGCCACCGCGCCC-----GGCCCTGAAGGTATTGTTAGA
21**111*1*1**1**11*1**1*11*1**1*111111111111111111*N11*****N*222
    
```

```

left  -TTTTTTTTTTTTTTTT-----TGAGA---CGGAGTTTCGCT
chrom GTTCATGTTCCCTTCTCCCTCACTGATCTCTCTCAAATTAACA
right GTTCATGTTCCCTTCTCCCTCACTGATCTCTCTCAAATTAACA
2**22*2**222**2*2222222***22222*22*22**22*2
    
```

Other    Simple Repeat    Low Complexity    DNA    LTR    LINE    SINE

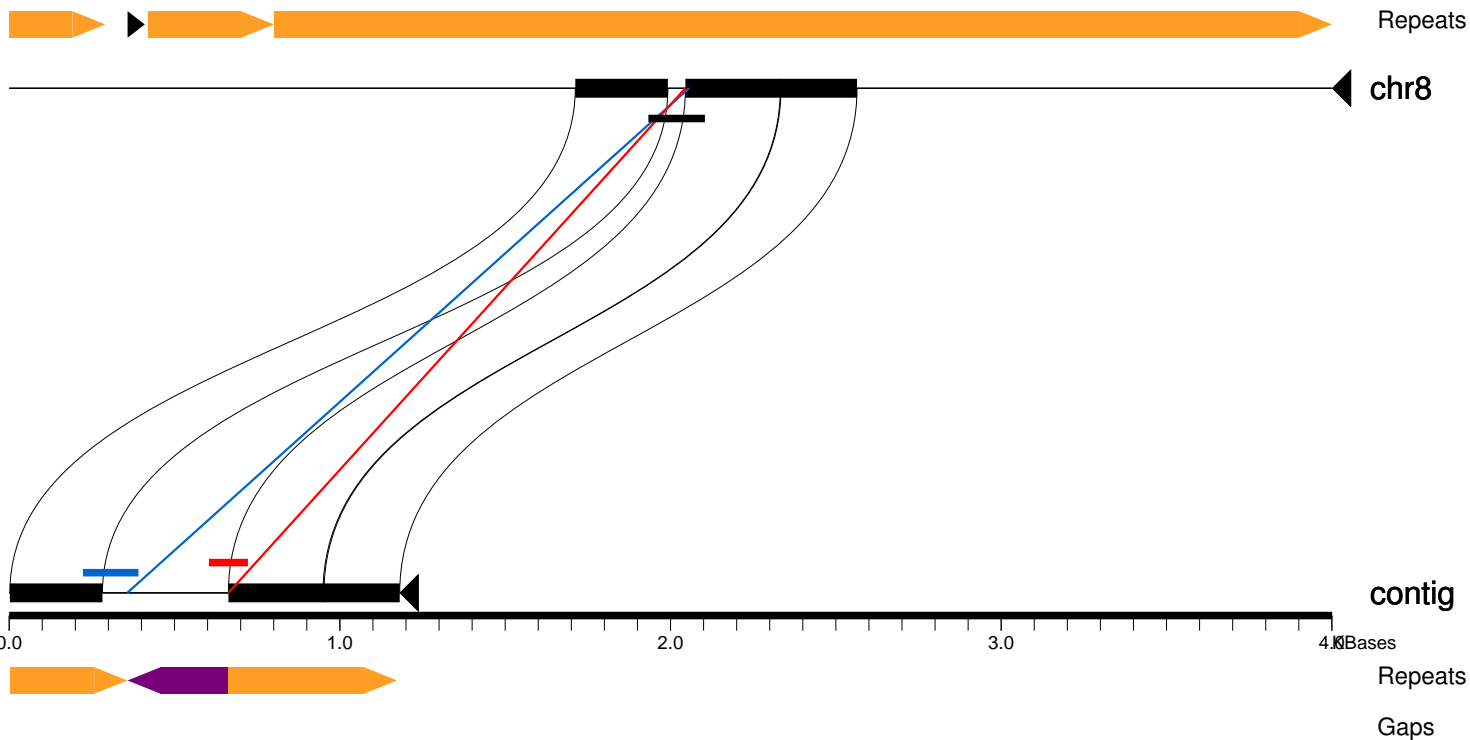

siteID: chr8\_139117399 Scafftig1 - Breakpoint: chr8:139117405

chr8:139117358-139117499

Overlap Length: 13 INS size: 328 Genotyped: Yes

```

left  CTTAGAGGGGTTAAGTCACATGTCTGAGGTCTCACAGATACATTTTTAAAAAGAGTCTGCAGGCCGGGCGC
chrom CTTAGAGGGGTTAAGTCACATGTCTGAGGTCTCACAGATACATTTTTAAAAAGAGTCTGCATACAAAGCAC
right AAAAAA-----AAAAAAAA-----AAAAAAAA-----AAAAAGAGTCTGCATACAAAGCAC
      111*1*111111**111*1*1111111111111*1*1*1*1*11111*****22*222**2*
  
```

```

left  ----GGTGGCTCA-CGCCTGTA-----ATCCCAGCACTT-TGGGAGGCCGAGGCGGGC-----
chrom TTAGAGGTGAATGA-TAAATGAAGGTATGAATGAGTGAATAAATGAAAGTATGAATAAGTAAATTAATGAA
right TTAGAGGTGAATGAATAAATGAAGGTATGAATGAGTGAATAAATGAAAGTATGAATAAGTAAATTAATGAA
      2222****22*2*12222**2*2222222**2222*2*2222**22**222*2222*22222222222
  
```

```

left  -GG
chrom TGA
right TGA
      2*2
  
```

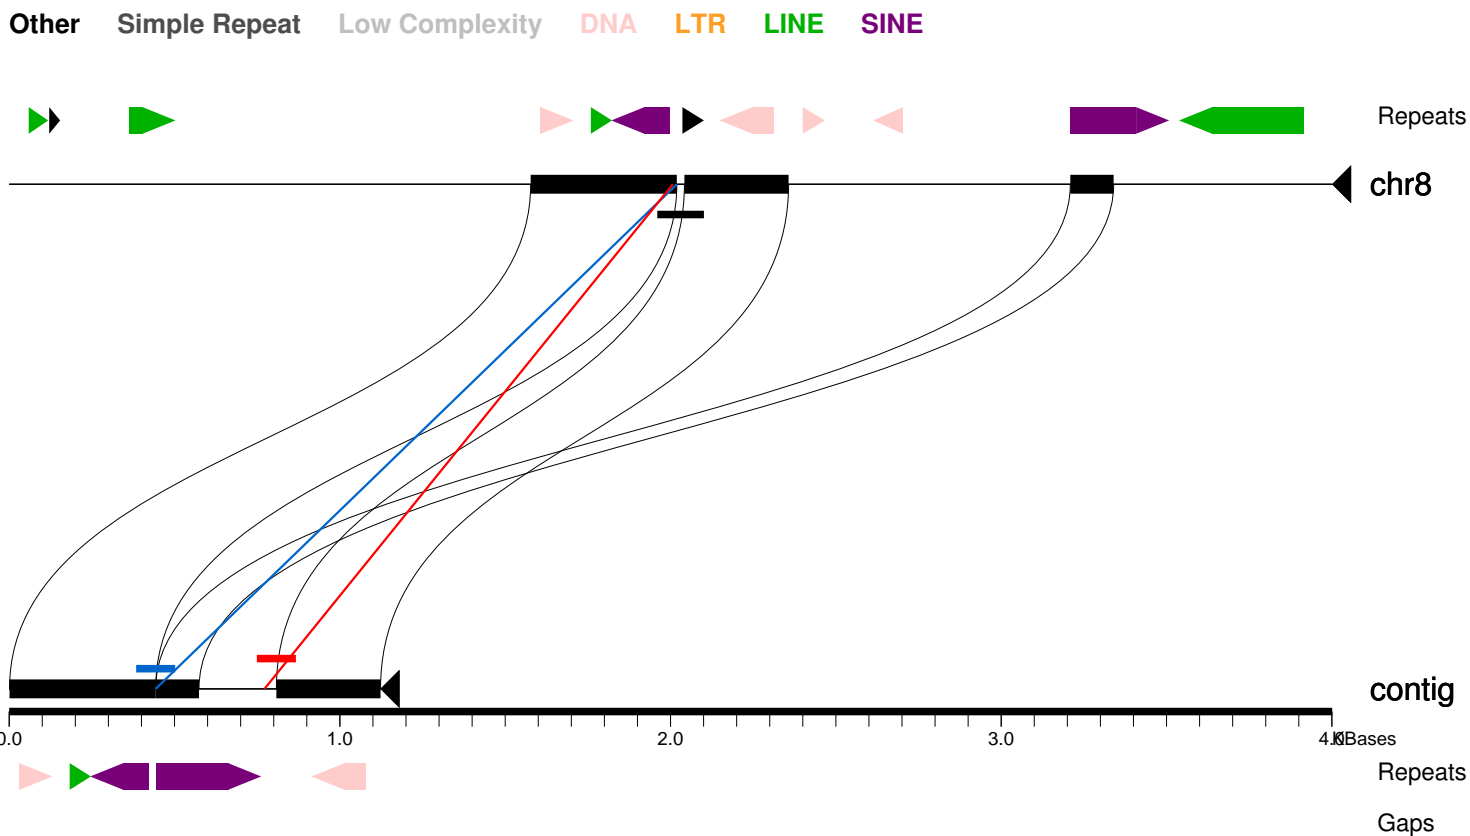





siteID: chr8\_140593328 Scafftig1 + Breakpoint: chr8:140593322

chr8:140593222-140593378

Overlap Length: 11 INS size: 306 Genotyped: Yes

left GCTTGAAACAGGGTTAAAAATAGCAAATACCATGAGAAGAGAAACTTCAGAAGGAAAAAAAAAGCCTTCAGT  
chrom GCTTGAAACAGGGTTAAAAATAGCAAATACCATGAGAAGAGAAACTTCAGAAGGAAAAAAAA-GCCTTCAGT  
right CC----ACCCGCCTCG-----GCC--TCCA----AAGTG---CT-----GGGATTACA-GGCGTGAGC  
1\*1111\*1\*1\*11\*1111111\*\*111\*1\*\*\*1111\*\*\*1\*111\*\*111111\*\*1\*11\*1\*2\*1\*1\*1\*\*1

left ATCAATCATAGAGGTGAAACATGTAATAATGGTTAAATTTT-----  
chrom ATCAATCATAGAGGTGAAACATGTAATAATGGTTAAATTTTAAAGCTCGCTAGCACTTGACTACAAAAA  
right -----CACCGCGCCCGCCATG-----GTTAAATTTTAAAGCTTGCTAGCACTTGACTACAAAAA  
111111\*\*11\*1\*111111\*\*\*11111111\*\*\*\*\*222222N2222222222222222222222

left ----TTTTT-----TT  
chrom CAAATGTTTACCCTAATC  
right CAAATGTTTACCCTAATC  
2222\*2\*\*\*2222222\*2

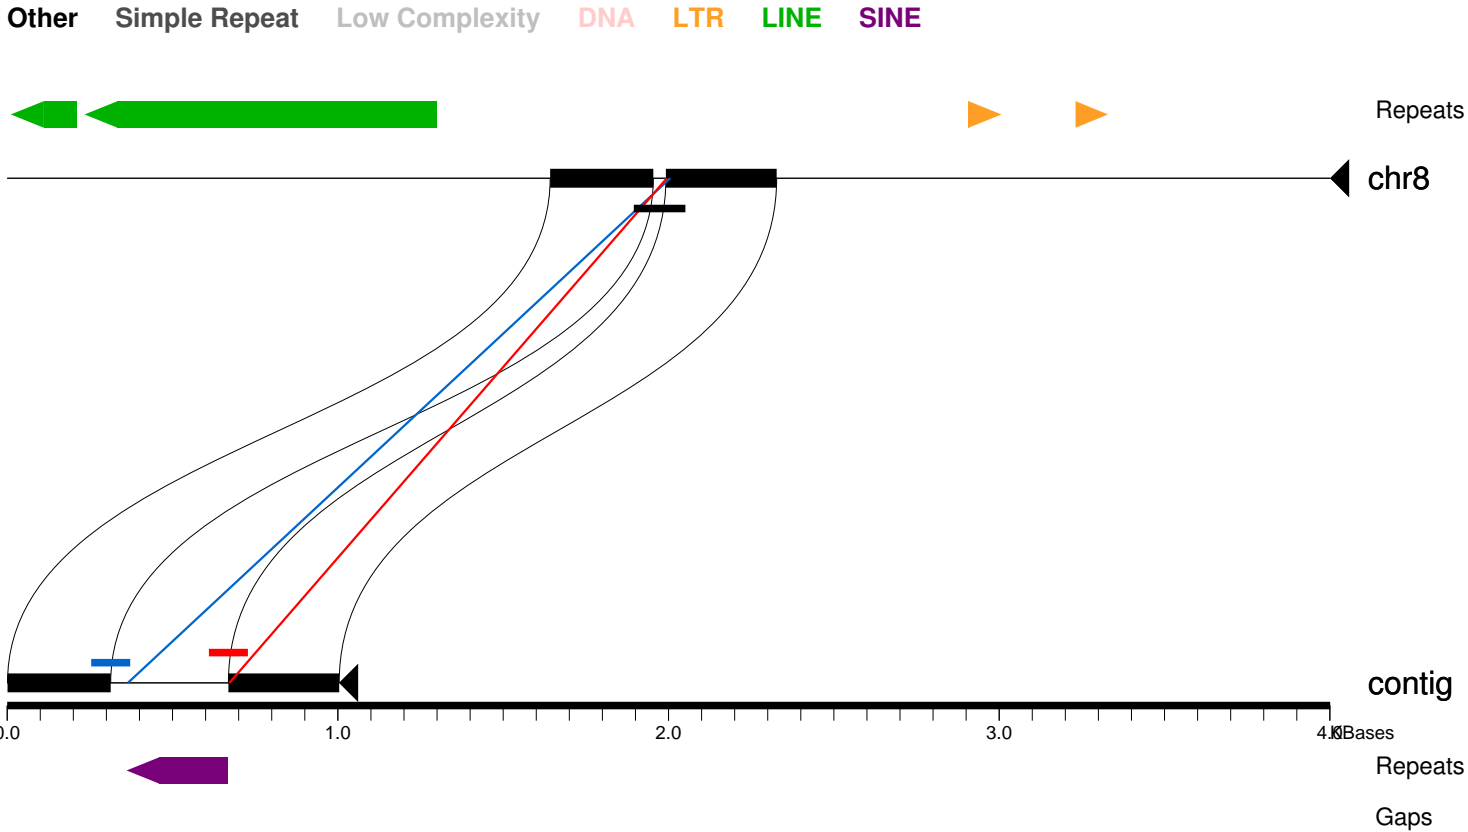

siteID: chr8\_141048050 Scafftig3 - Breakpoint: chr8:141048052

chr8:141048003-141048108

Overlap Length: 11 INS size: 306 Genotyped: Yes

```
left ACACACCC-----CAGAGCTTCCCTCGTGCTGCATGGTAGGAAAGTTGCTGAAA---GCTGTATT
chrom ACACACCC-----CAGAGCTTCCCTCGTGCTGCATGGTAGGAAAGTTGCTGAAA---GCTGTATT
right GCACTCCAGCCTGGGCGACAGAGCGAGACTCCGTCTCAAAAAAAAAAAAAAAAAAAAAAAAAAAAAAAGCTGTATT
1***1**111111111111*****1111***111**11*1111*11***11111111***111*****

left GTTGGCCGGGCGCGGTGGCTCACGCCGTGTAATCCCAGCACTTTGGGAGGCCGAGGCGGGCGG-
chrom GTTTCACAC---CTGTGT-----GCCTGAAATGAATGTCCTTA-----CCCACTCTCTCCAA
right GTTTCACAC---CTGTGT-----GCCTGAAATGAATGTCCTTA-----CCCACTCTCTCCAA
**222*22222*2***222222*****2***2222*22***2222222**2*22*222*222
```

Other Simple Repeat Low Complexity DNA LTR LINE SINE

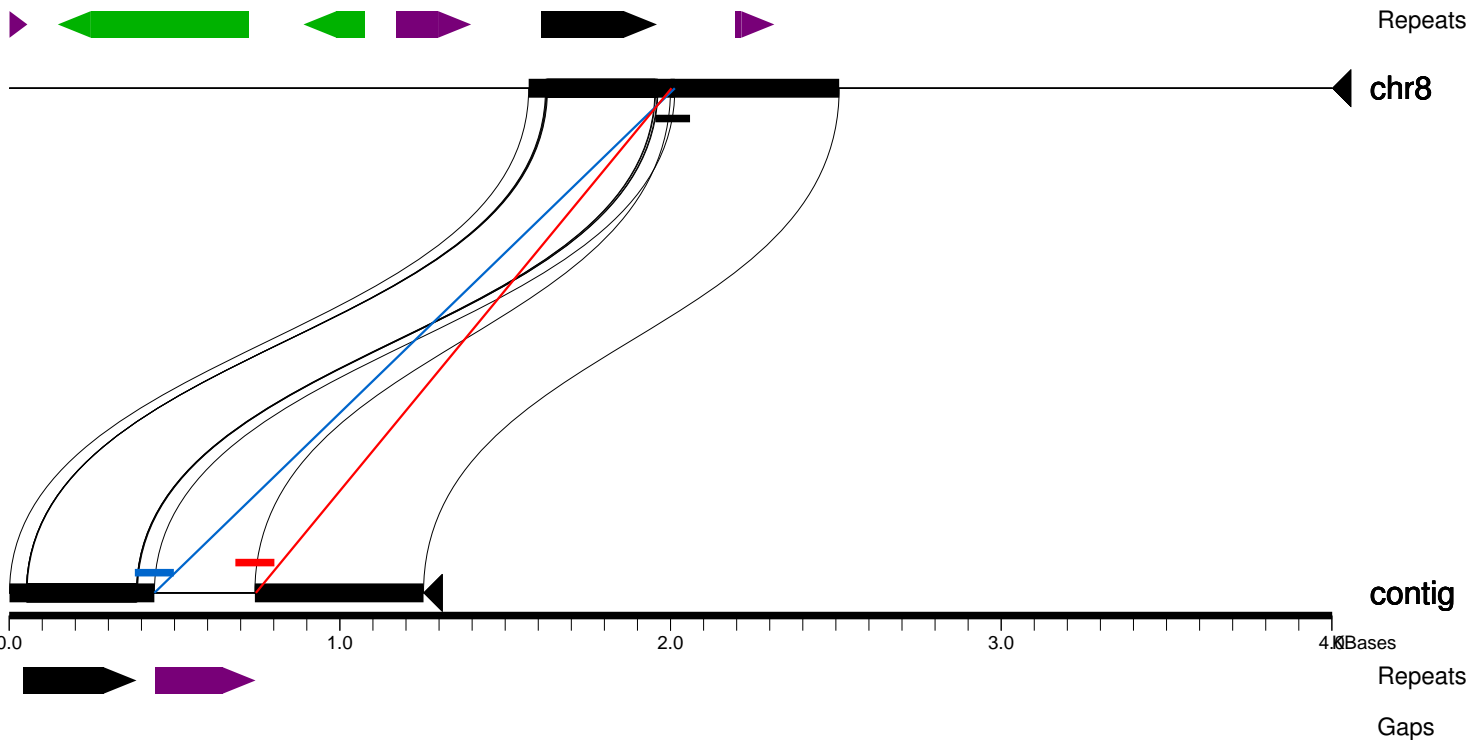

siteID: chr8\_142940041 Scafftig5 + Breakpoint: chr8:142940044

chr8:142939996-142940103

Overlap Length: 12 INS size: 388 Genotyped: No

```

left  GATACAACCTTCTAGATCATCATAACCATCATGATTACCAC-----CATCACCA-----TCAC
chrom GATACAACCTTCTAGATCATCATAACCATCATGATTACCAC-----CATCACCA-----TCAC
right ----ATGGTCTCGATC-TCCTGACC-TCGTGATCCGCCCGCCTCGGCCTCCCAAAGTGCTGGGATTCAC
      11111*111***1***1**1*1***1**1***111*1*1111111*1**1*1*11111111111***
  
```

```

left  TACTTCTTTTTNNNNNNNNNNNNNNNNNNNNNNNNNNNNNNNNNNNNNNNNNNNNNNNNNNNNNNNNNNNNNN
chrom TACTTCTTACTATTATTGTTGCTGTTGTTTTTTTTTTAAGACTGGGAGTTAGAAGAT-----
right TACTTCTTACTATTATTGTTGCTGTTGTTTTTTTTTTAAGACTGGGAGTTAGAAGAT-----
      *****22*2*22222222222222222222222222222222222222222222222222222222
  
```

Other   Simple Repeat   Low Complexity   DNA   LTR   LINE   SINE

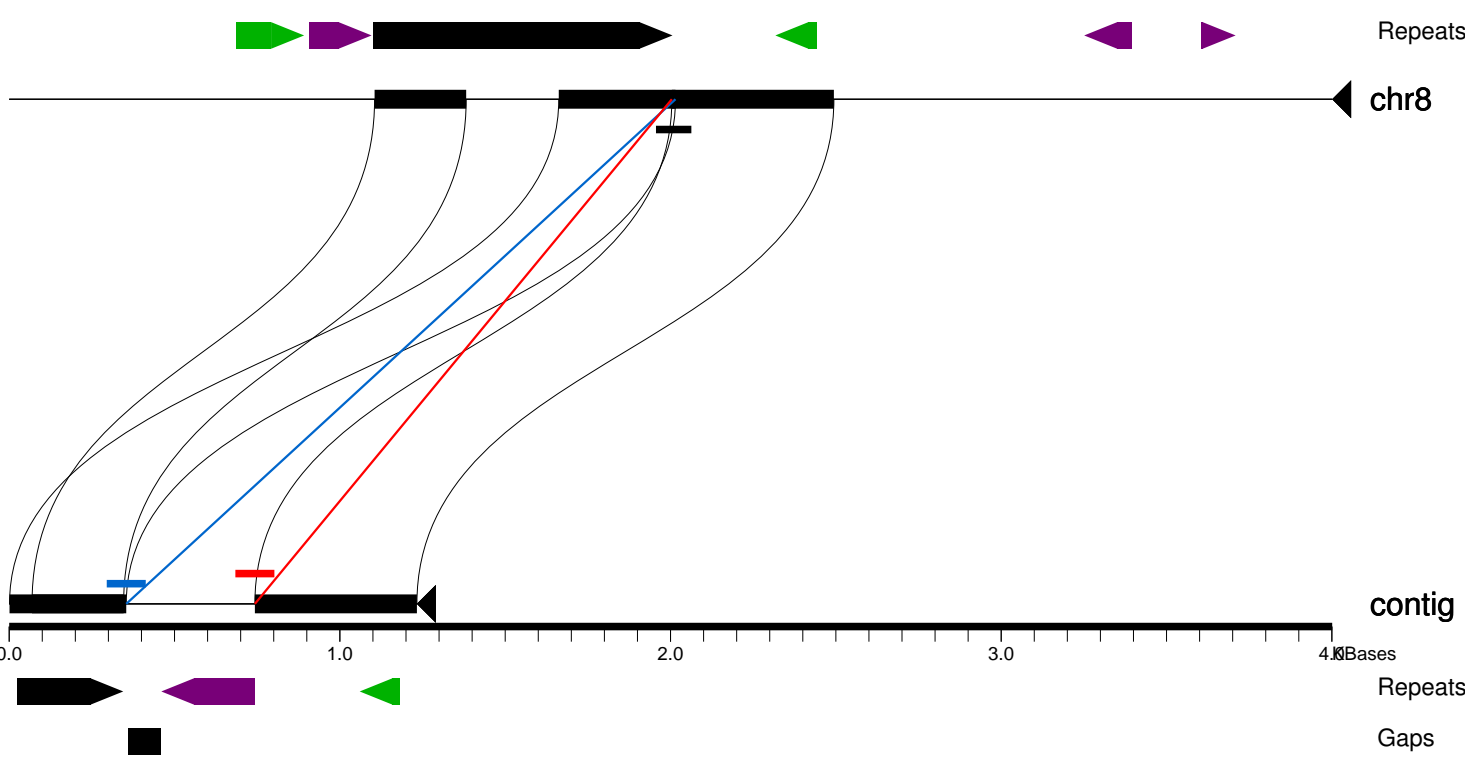

**siteID: chr8\_15149716 Scaffitg1 - Breakpoint: chr8:15149768**  
**chr8:15149608-15149942**  
**Overlap Length: 15 INS size: 422 Genotyped: No**

```

left      -----CTCAACTTAACTGTATATTAATTTGCAA
chrom    ATGTATTACCTCTTTTCATGTATACCAAATGAGATGTCTTATCTCAACTTAACTGTATATTAATTTGCAA
right    -----TTCA-GTA-----GAGACGGGGTTTACCGTTTTAGCCGGGATGGTCTCG--A
          2222 222                2222N2N2N2N2*1*111**1*111111**1111*1*11*
    
```

```

left      TTAAATGTACTCTAAACCATGGCTCTTTGACATTTTGAAAAAGTGCCAGTTTTATCAATTTAAAGTTGAGAC
chrom    TTAAATGTACTCTAAACCATGGCTCTTTGACATTTTGAAAAAGTGCCAGTTTTATCAATTTAAAGTTGAGAC
right    TCTCCTGACCTCGTGATCCGCCCGCCTCGGCCTCCC--AAAGTGCTGGGATTAC-----AGGCGTGAGCC
          *1111**11***111*1*1111*1*1*1*1*1*111111*****11*11**111111*1111***1*
    
```

```

left      TTTGAGGTTACCAAATGGTTGATTACTTATTTCTTTNNNNNNNNNNN-----
chrom    TTTGAGGTTACCAAATGGTTGATTACTTATTTCTTTGTTACTTGTGTATTCCACCATTTATTTATTGGACACT
right    ACCGCGC---CC---GGCTGATTACTTATTTCTTTGTTACTTGTGTATTCCACCATTTATTTATTGGACACT
          111*1*1111**1111**11*****11*2*222222222222222222222222222222222222222222
    
```

```

left      -----
chrom    GTACTAAGTGCTGGGGATACAAAAGTAAACAAGACAGAATTTTATGAGTCAATAAATGATGAAATGCAAAA
right    GTACTAAGTGCTGGGGATACAAAAGTAAACAAGACAGAATTTTATGAGTCAATAAATGATGAAATGCAAAA
          222222222222222222222222222222222222222222222222222222222222222222222222
    
```

```

left      -----
chrom    ATTTATTATTTTTCATAATGATTGTAATTTAAATGCTCTCAACAAAAGAAGTATAGGCA
right    ATTTATTATTTTTCATAATGATTGTAATTTAAATGCTCTCAAC-----
          222222222222222222222222222222222222222222222222222222222222222222
    
```

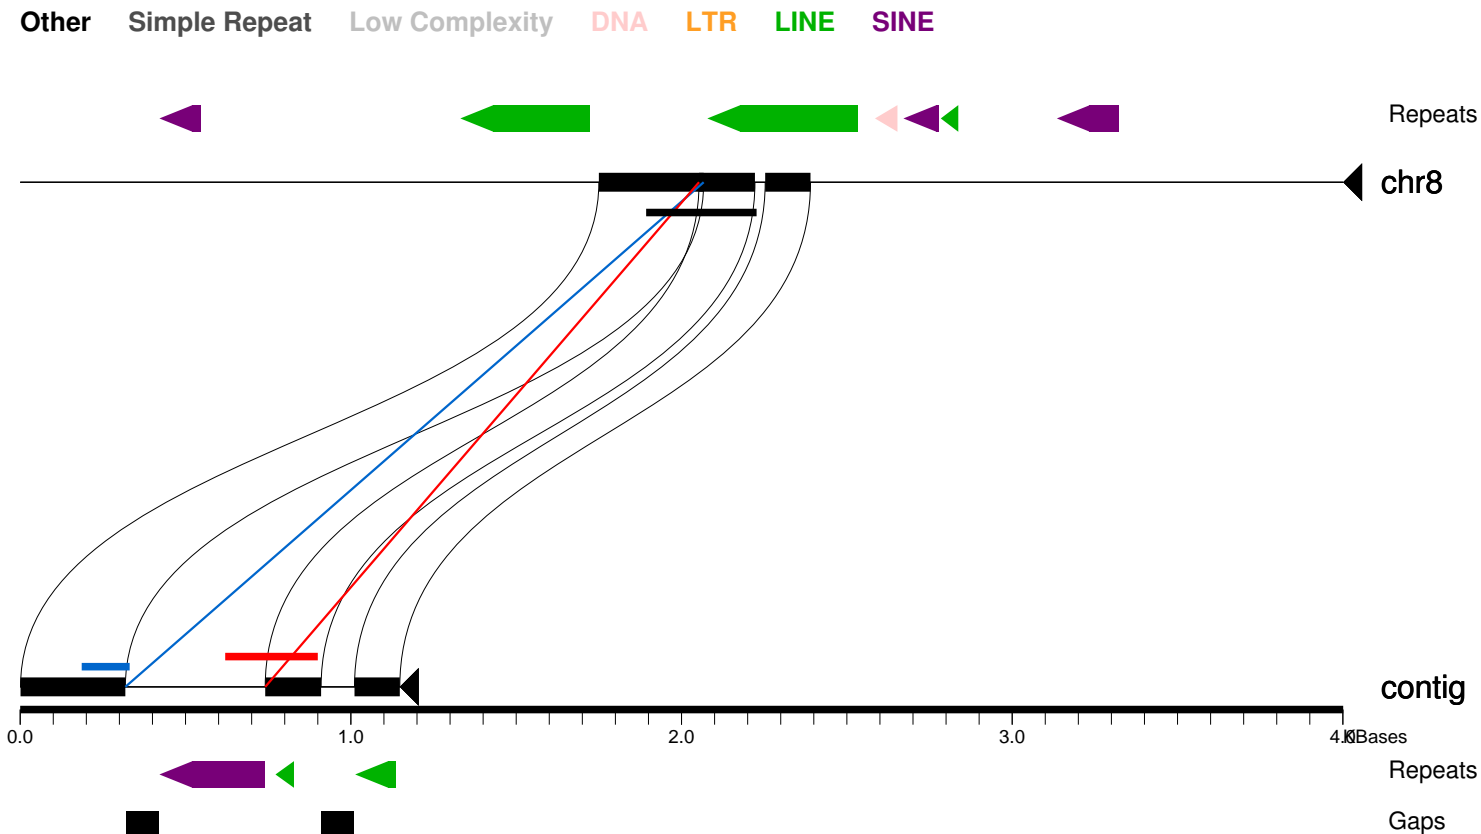





siteID: chr8\_15548529 Scaffitg2 - Breakpoint: chr8:15548507

chr8:15548347-15548680

Overlap Length: 14 INS size: 311 Genotyped: Yes

```
left -----CATTGGTCTGTGTGTCTGTATTTTGTACCGGTACAATGGTGTGTGTGGTTACTGTAGCATTG
chrom TATTCTGTTCCATTGGTCTGTGTGTCTATATTTGTACCGGTACAATGGTGTGTGTGGTTACTGTAGCATTG
right TTTAGTAGA-----GACGGGGTTTC-ACCTTGTTAGCC--AGGATGGTCTCG-----
2N2NN2NNN 11111*1*1*1**1**1211**11**1*111*11*****1*1*111111111111111111
```

```
left CAGTATAGTTTGAAGTCTGGTAATGCCAAATGCCTCCAGCTTTGCCCATTTTGTCTTAGGATTGCCTTGGC
chrom CAGTATAGTTTGAAGTCTGGTAATGCCAAATGCCTCCAGCTTTGCCCATTTTGTCTTAGGATTGCCTTGGC
right ----ATCTCCTGACCTCATG--AT-CCACCCGCCTCGGCCT---CCCAAAGTGCTG-GGATTACAGGCGT
1111**1111***11**11*11**1**111*****111*111***111***11***11***1*1111*1
```

```
left TATTCAGGCTATTTTTTGGTTCCATATGAATTTT*****TTTGGAGACGGA-GTC-
chrom TATTCAGGCTATTTTTTGGTTCCATATGAATTTTAAAAATAGTTTTTTTCCTAATTTCTGTGAAGAATGTCC
right GAGCCA--CCGCGCCCGGCC*CCATATGAATTTTAAAAATAGTTTTTTTCCTAATTTCTGTGAAGAATGTCC
1*11**11*11111111*11*****2222*22*****22*22**2**2**2*2**2**2
```

```
left -----TCGCTCTGTGCGCCAGGTCG--GACTGCGGACTGCAGTGGCGCAATCTCGGCTC-ACT
chrom TTGGTAGTTTGTATAGAAAATATCACTGAATTTGTGGATTGCTTTGGGCAGTGTGGCCATTTTAGCTATAGT
right TTGGTAGTTTGTATAGAAAATATCACTGAATTTGTGGATTGCTTTGGGCAGTGTGGCCATTTTAGCTATAGT
22222222222*2*222*2**2*22*22*2*22**2***22222*****22**2**2*22***22*2*
```

```
left GC-----AAGC-----TCCGCTTCCCGGTTTCACGCCA
chrom GATTCTTCCCTAATCATGAACATGAAATGTTTTTCCATTTGTATTGATCATCTCT
right GATTCTTCCCTAATCATGAACATGAAATGTTTTTCCATTTG-----
*222222222*2*2222222222222222**22*2NNN1NN111NNN1N
```

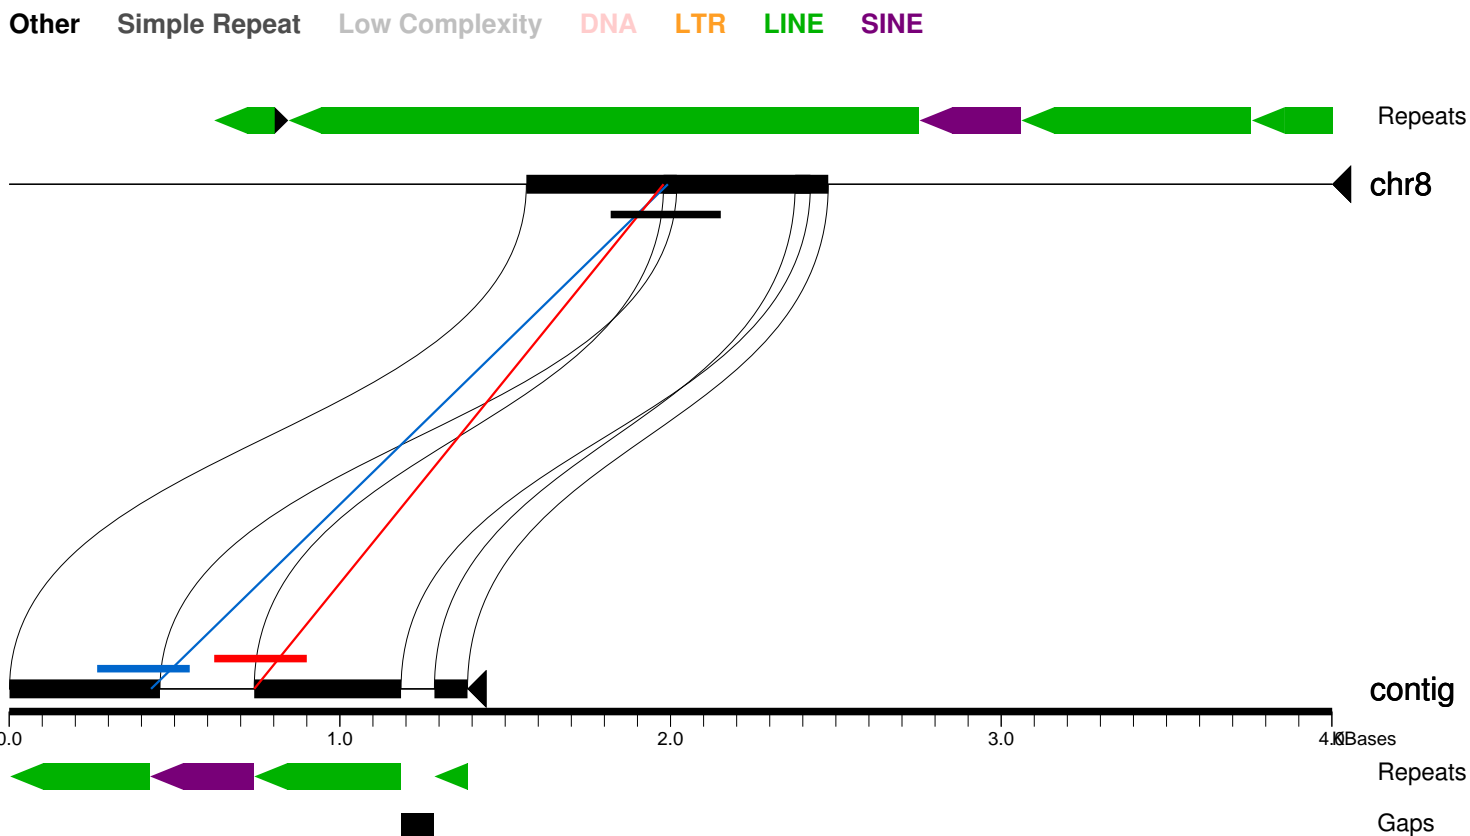

siteID: chr8\_16102805 Scaffitg3 - Breakpoint: chr8:16102807

chr8:16102763-16102866

Overlap Length: 16 INS size: 260 Genotyped: Yes

```
left      T-----ATG-TCTCTGTGTTTCATATAT----ATCCTTACATATATGTGTGTATA----CATATTATGGA
chrom     T-----ATG-TCTCTGTGTTTCATATAT----ATCCTTACATATATGTGTGTATA----CATATTATGGA
right    AGCCGGGATGGTCTCGATCTCCTGACCTCGTGATCCGCCCCGCTCGGCCTCCCAAAGTGCATATTATGGA
          11111111***1***11*1*1*11*11*1111****111*111*11*11*1111*1111*****
```

```
left      TTCTTTTTTTTTTTTTTTGAGACGGAGTCTCGCTCTGTCGCCAGGCTGGAGTGCAGTGGCGGG
chrom     TTCTTAAAAAATATATAAGCATATGTACA-----TGTGTTGT--ATGTATGCGTACA-----
right    TTCTTAAAAAATATATAAGCATATGTACA-----TGTGTTGT--ATGTATGCGTACA-----
          ***22222*2*2*2222*2*2*2*2222222*2***2*222*2*222*2**2**22222222
```

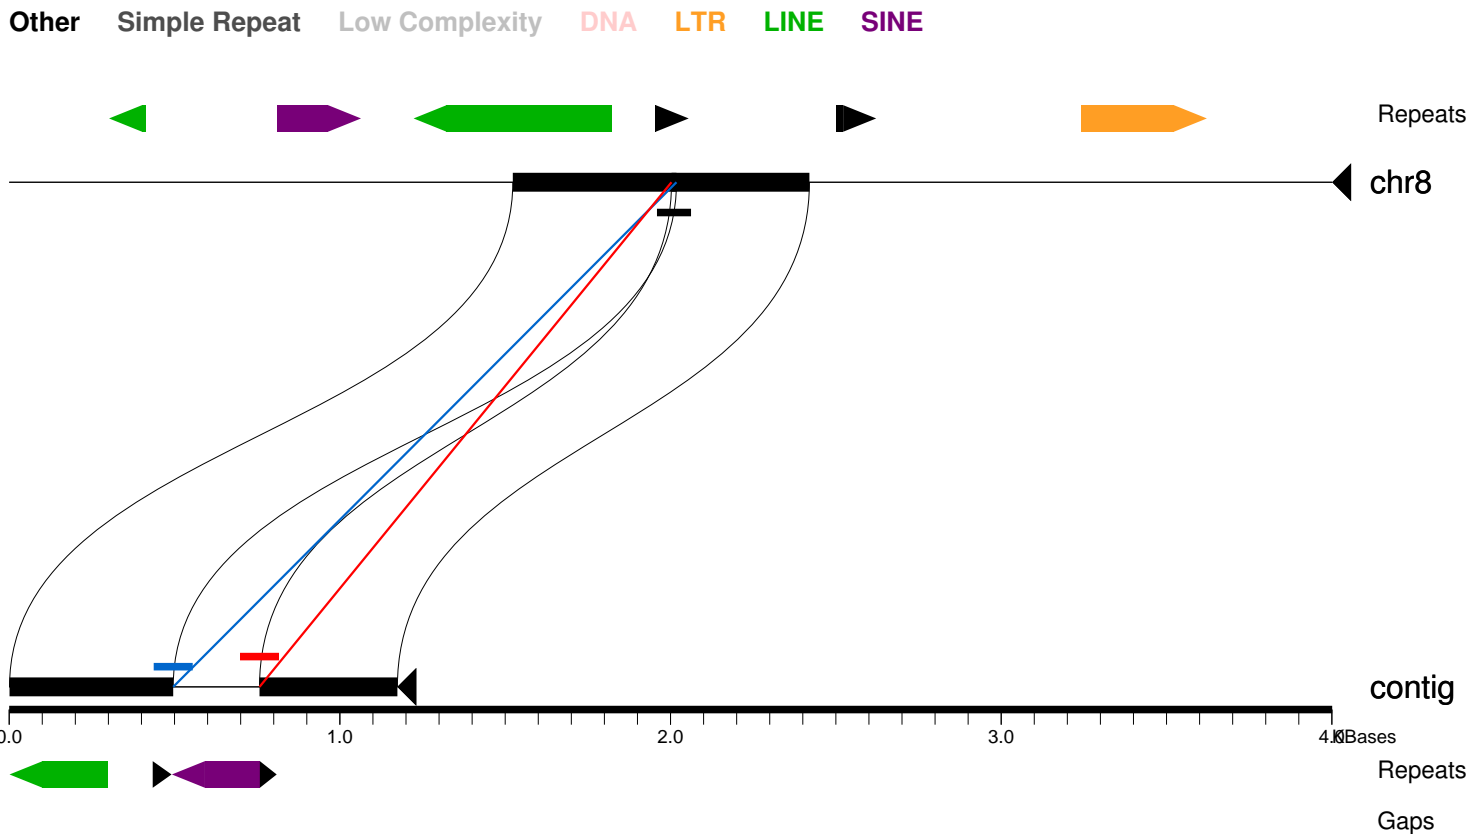

siteID: chr8\_17336025 Scaffitig2 - Breakpoint: chr8:17336010

chr8:17335956-17336069

Overlap Length: 3 INS size: 411 Genotyped: No

```
left  GGGACCTCCTAGTC-TGCCATCTTGCTTACGTG-CAGTACTTTGAATCTTCATATG---AAACATNNNNN
chrom GGGACCTCCTAGTC-TGCCATCTTGCTTACGTG-CAGTACTTTGAATCTTCATATG---AAATATTCTAT
right CCGCCCGCCTCGGCCTCCCAAAGTGCTGGGATTACAGGCGTGAGCCACCGCGCCCGGCCAAATATTCTAT
      11*1**1***1*1*1*1***111****1111*11***111*11*111*11*1111*111***2**22222
```

```
left  NNNNNNNNNNNNNNNNNNNNNNNNNNNNNNNNNNNNNNNNNNNNNNNNNNNNNNNNNNNNNNNNNNNNN
chrom TACAGCTAAATTGACAAATTTATTGGCATATGGTTGCTCATAATAGTCC-----
right TACAGCTAAATTGACAAATTTATTGGCATATGGTTGCTCATAATAGTCC-----
      22222222222222222222222222222222222222222222222222222222222222222222
```

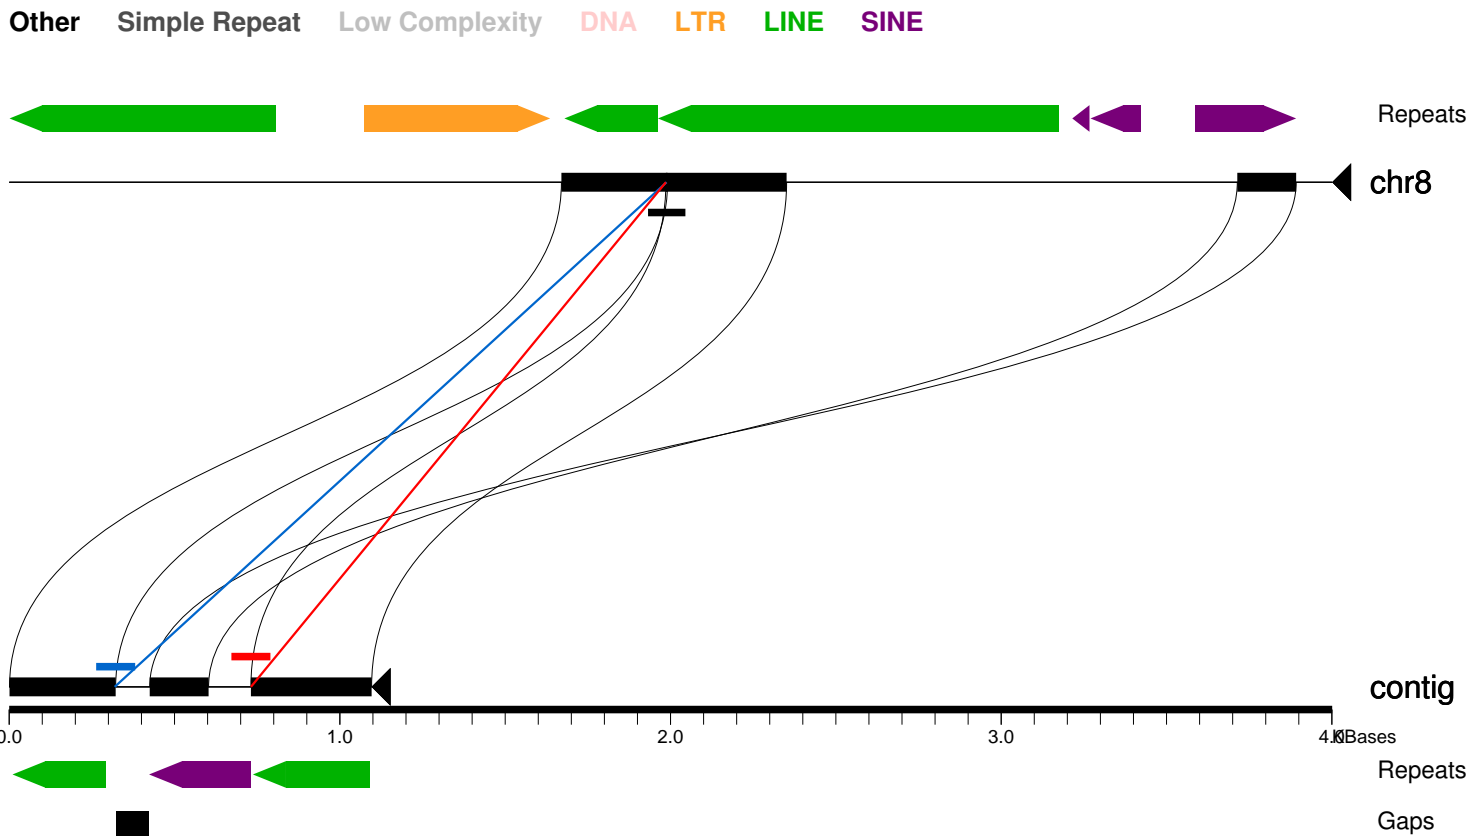

siteID: chr8\_18617470 Scaffold3 + Breakpoint: chr8:18617463

chr8:18617418-18617522

Overlap Length: 15 INS size: 501 Genotyped: No

```

left  TTTCTGTATATAATGAGAAATGGAGAATTATCAACCACC-----AGAGTTAGAAATGCAGA
chrom TTTCTGTATATAATGAGAAATGGACAATTATCAACCACC-----AGAGTTAGAAATGCAGA
right NNNNNNNNNNNNNNNNNNNNNNNNNNNNNNNNNNNNNNNNNNNNNNNNNNNNNNNNNNNNNN
1111111111111111111111111111111111111111111111111111111111111111
*1*111******
left  GCAGGGCCGGGCGCGGTGGCTCACGCCTGTAATCCACGACTTTGGGAGGCCGAGGCGGGTGG
chrom GCAGATTTCGATAGAAGA-----TAGAAACGCAGCT-TTTCTGTTACAAACAAGAA---
right GCAGATTTCGATAGAAGA-----TAGAAACGCAGCT-TTTCTGTTACAAACAAGAA---
***222**222*22*22222222222*22**2*2****22***22*222*22*222*22222

```

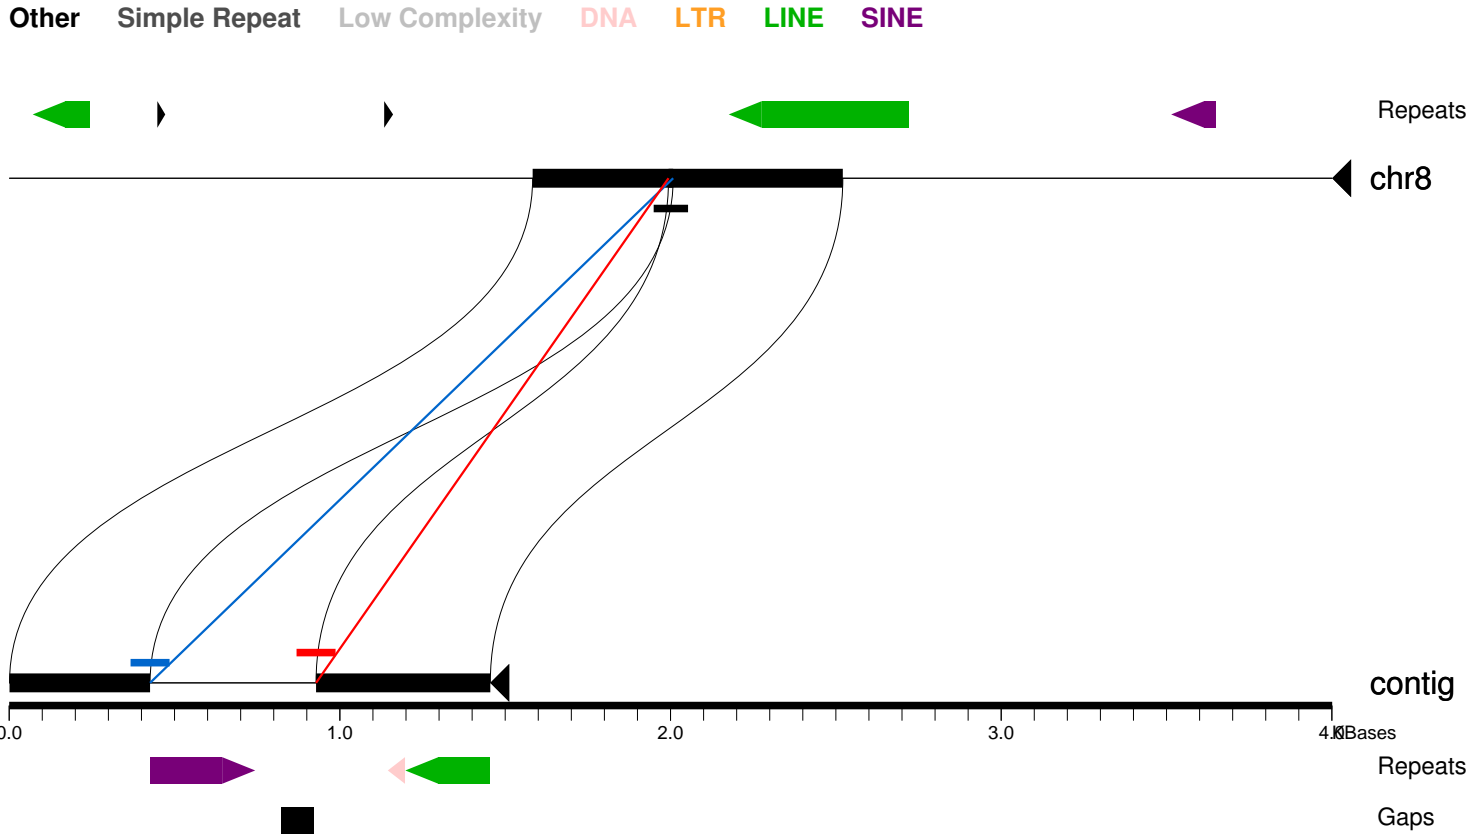



siteID: chr8\_23042389 Scafftig4 + Breakpoint: chr8:23042409

chr8:23042360-23042468

Overlap Length: 11 INS size: 430 Genotyped: No

```

left  CCACGAGCAATGTCAATTAGCCAAACCTTTCAAT-----TTTCTATCAGATTTTAAAGAATATT
chrom CCACGAGCAATGTCAATTAGCCAAACCTTTCAAT-----TTTCTATCAGATTTTAAAGAATATT
right NNNNNNNNNNNNNNNNNNNNNNNNNNNNNNNNNNNNNNNNNNNNNNNNNNNNNNNNNNNNNNNNNNNNNNN
111111111111111111111111111111111111111111111111111111111111111111111
*1*1111*****

left  GGCCGGGC----GCAGTGGCTCACGCCTGTAATCCCAGCACTTTGGGAGGCCGAGGCGGGCGG
chrom TACAATGTACTTGCA-TGGATCATTGATGACATACTAGGACTTT-----CTATTT-----
right TACAATGTACTTGCA-TGGATCATTGATGACATACTAGGACTTT-----CTATTT-----
22*222*22222***2***2***2222**22**2*2**2*****2222222*2*222222222
    
```

Other Simple Repeat Low Complexity DNA LTR LINE SINE

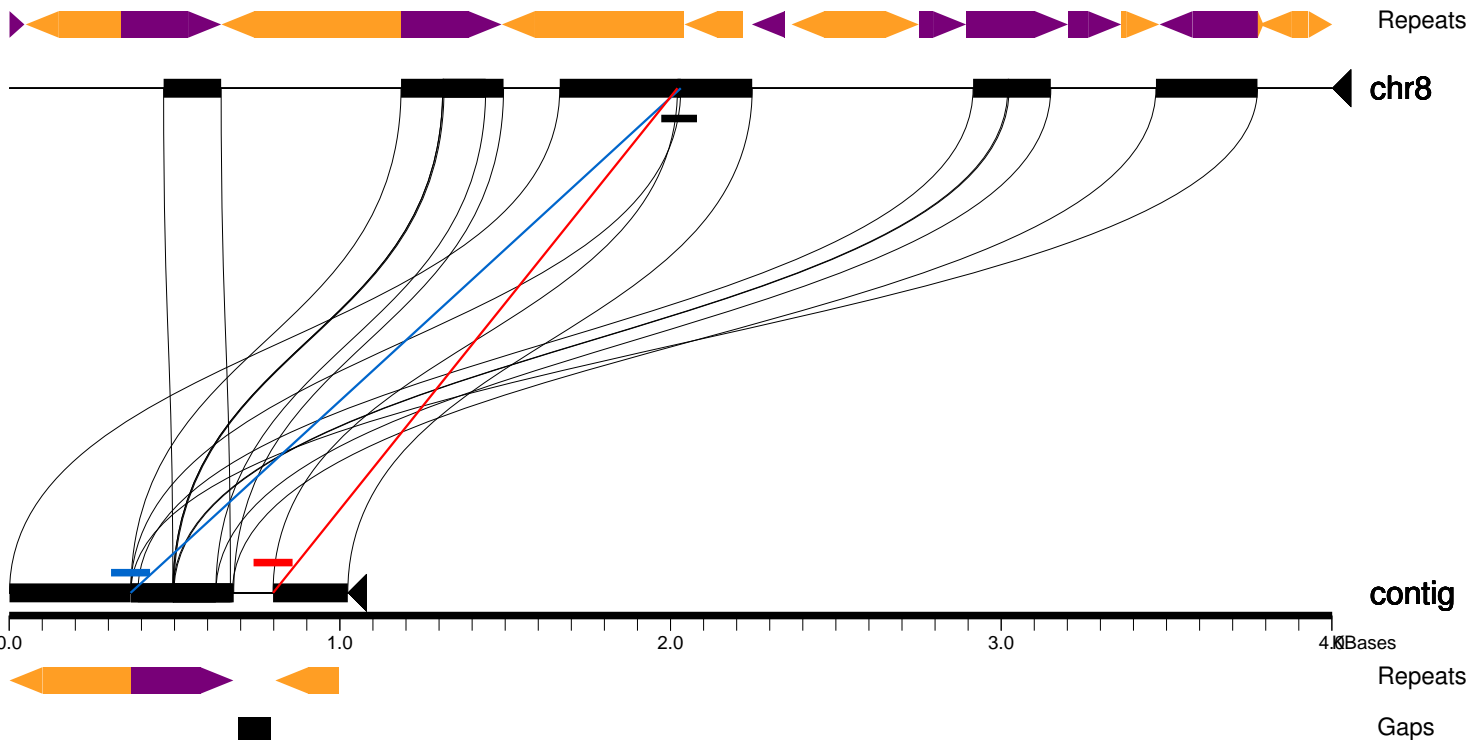

siteID: chr8\_24989905 Scaffitig1 + Breakpoint: chr8:24989993

chr8:24989941-24990052

Overlap Length: 8 INS size: 147 Genotyped: Yes

```
left  ---AGG---AAGAAACT-TCATGAAAAATCTA--TAAGTAAATGTTTCTCAAAAATCAGAATGGTTTTTCT
chrom ---AGG---AAGAAACT-TCATGAAAAATCTA--TAAGTAAATGTTTCTCAAAAATCAGAATGGTTTTTCT
right CCCGGGTTACGCCATTCTCCTGCCTCAGCCTCCCAAGTAGCTGGGACT--ACAGGCGCCCAGTTTTTCA
      1111**111*1*11*1*1**1**1111*1*11111*****11**111**11*1*111*111*****2
```

```
left  TTTTTTTTTTTTTTTTGGAGACGGAGTCTCGCTCTGTCTGCCAGGCTGGAGTGCAGTGGC
chrom TGACAGAAATC-----AAGAAGTCTTTCAAAGATAAAAAATGACAAAATAAAAGAT
right TGACAGAAATC-----AAGAAGTCTTTCAAAGATAAAAAATGACAAAATAAAAGAT
      *22222222*22222222*2*2*****22*222*222222*2*2222*2222*22*22
```

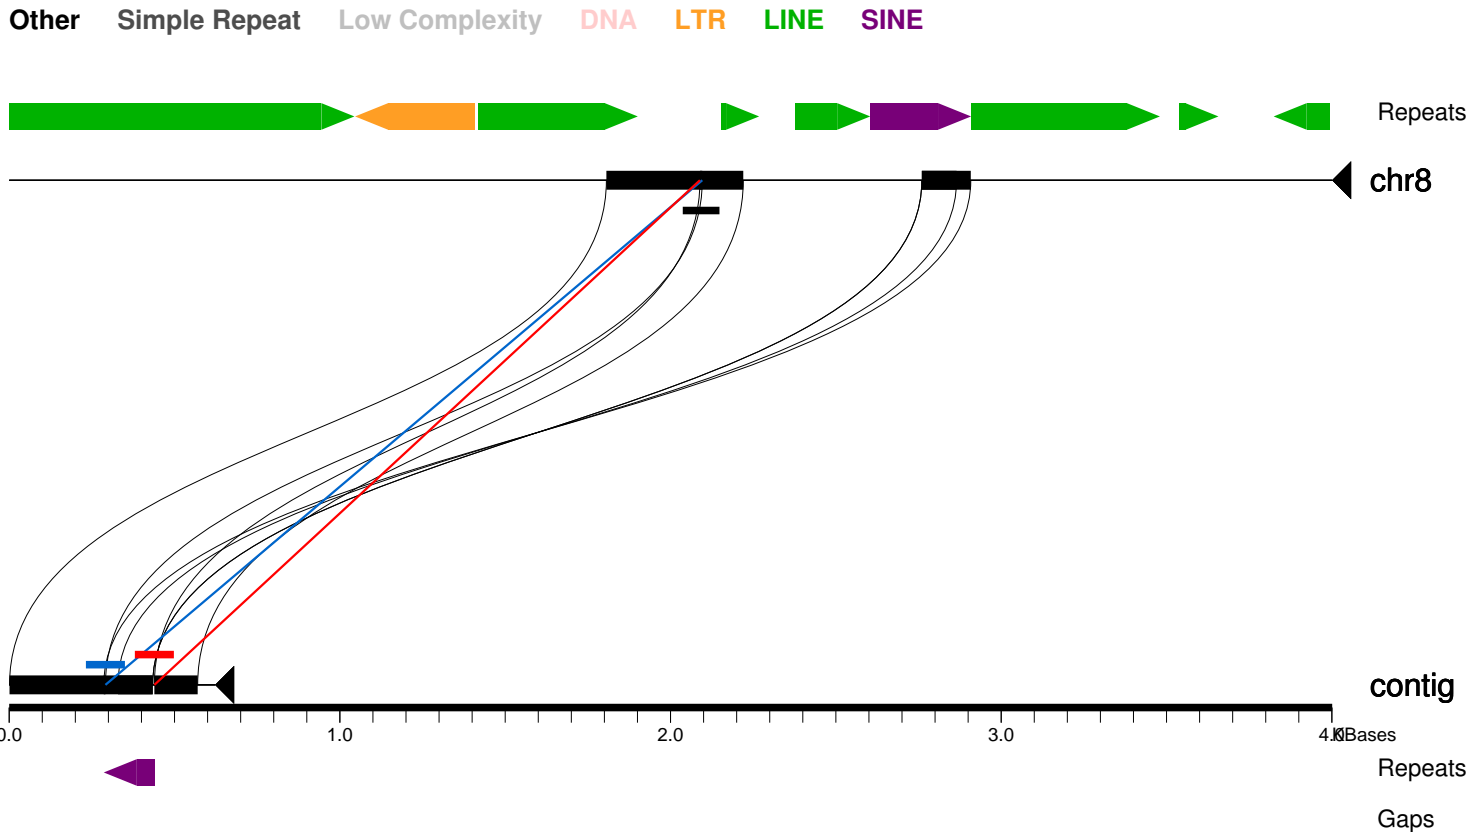



siteID: chr8\_25172668 Scaffig11 + Breakpoint: chr8:25172647

chr8:25172606-25172706

Overlap Length: 14 INS size: 288 Genotyped: Yes

```
left  GCTGAAAAC---ATCTTACTGACT-----TTCATTTATGTTG-----AGG-GTAA---ATATAAAAAAT
chrom GCTGAAAAC---ATCTTACTGACT-----TTCATTTATGTTG-----AGG-GTAA---ATATTAAAAAT
right -CTGACCTCGTGATCCGCCCGCCTCGGCCTCCCAAAGTGCTGGGATTACAGGCGTGAGCCATATAAAAAAT
      1****111*111***111*1*1**11111*1*11111**1**1111111***1**1*111****N*****
```

```
left  TCTTTTTTTTTTTTTTTTTTTTTTTGAGACAGAGTCTCGCTCTGTTGCCCAGGCTGGAGTGCAGTGGCGG
chrom TCTTAATTTG-----CCCACCG-GCCTCAG---GGGGATCTGACTT-ATATCTGTCTCTG
right TCTTAATTTG-----CCCACCG-GCCTCAG---GGGGATCTGACTT-ATATCTGTCTCTA
      ***22***222222222222222222**2*2*2***22222*22*22*2*2**22*222*2**22*21
```

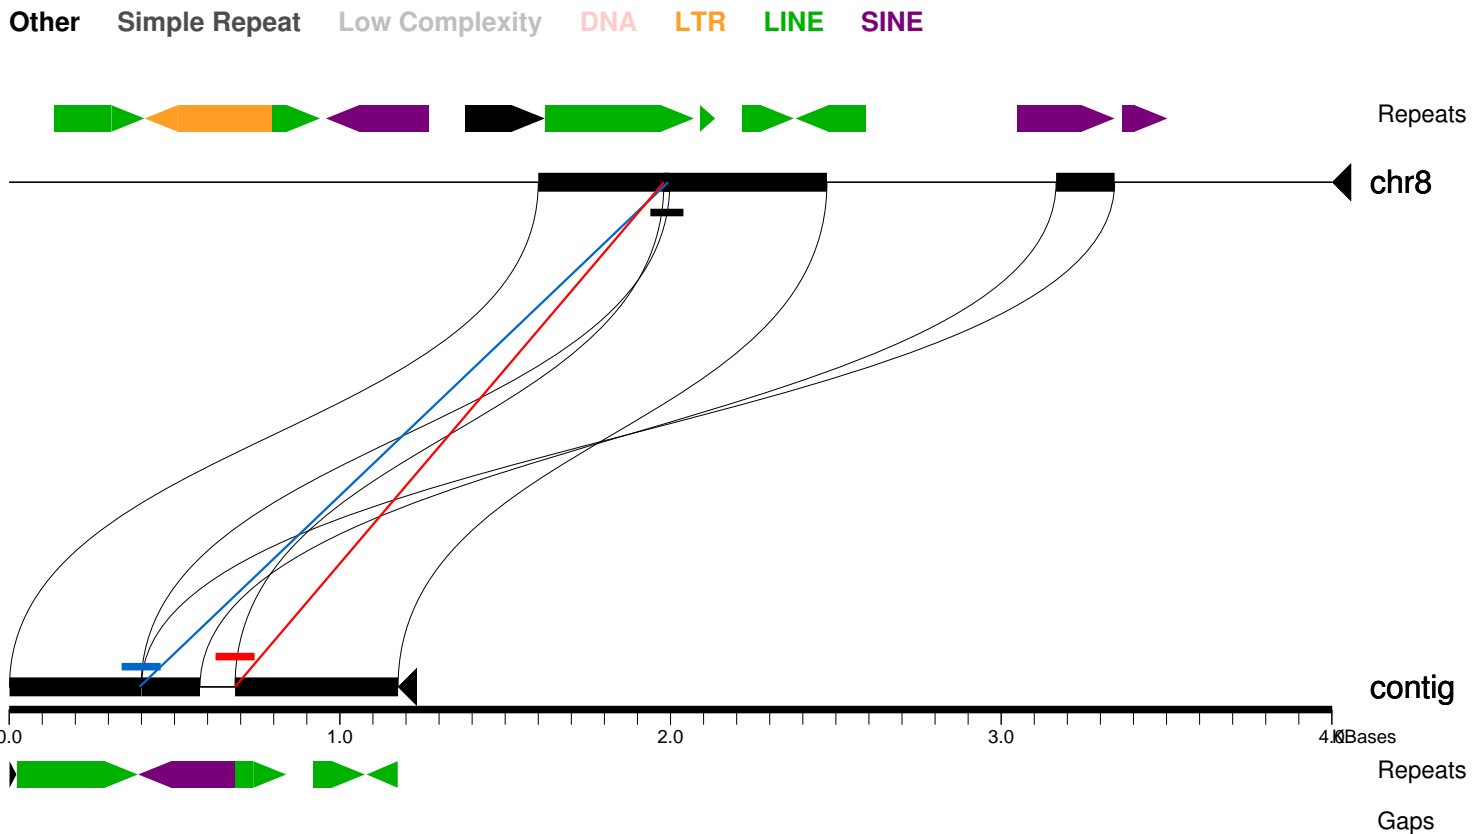

siteID: chr8\_32359993 Scaffold13 + Breakpoint: chr8:32359972

chr8:32359927-32360031

Overlap Length: 15 INS size: 298 Genotyped: Yes

```
left  -----CAACATGTG-----ATTTGGTGGGGACACACATTTAACCCATATCAACTA--CTAAGCTCATT
chrom -----CAACATGTG-----ATTTGGTGGGGACACACATTTAACCCATATCAACTA--CTAAGCTCATT
right TCCGCCCCGCTCGGCCTCCCAAAGTGCTGGGATTACAGGCGTGAGCCACCGCACCCGGCCTAAGCTCATT
      11111*11*1*11*1111111*11**1***111***1111*1*1***111**1*1111*****
```

```
left  CTTTFFFFFFFFFFFFFFFFFFFFFFFFGAGACGGAGTCTCGCTCTGTGCGCCAGGCTGGAGTGCAGTG
chrom CTTTAAAAACCTTATAAAT-----ACACCCATTCA-----GTCCCTAGCCAGCGTGGCCAC
right CTTTAAAAACCTTATAAAT-----ACACCCATTCA-----GTCCCTAGCCAGCGTGGCCAC
      ***222222**2*222*22222*2**22*2**2222222222*2**22**22*2***22222
```

Other Simple Repeat Low Complexity DNA LTR LINE SINE

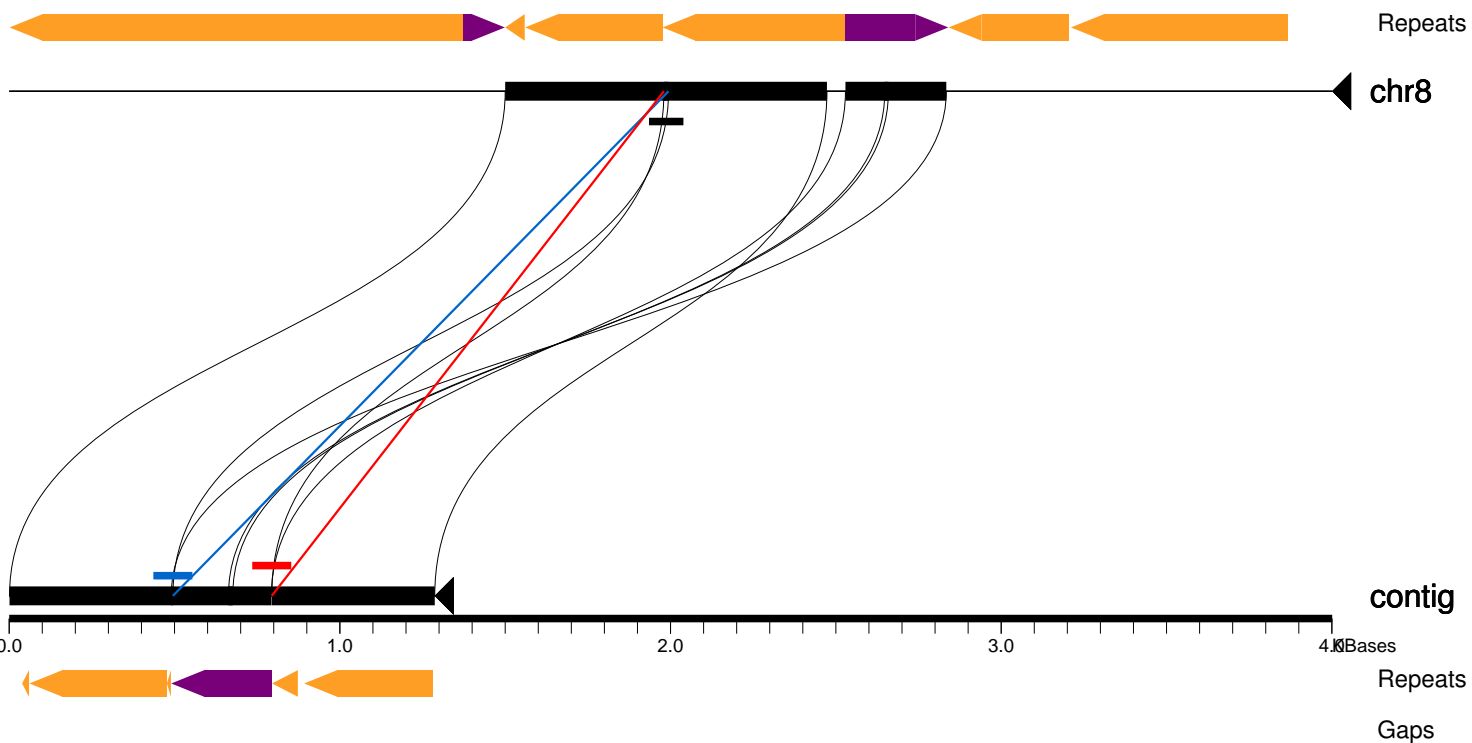

siteID: chr8\_33210000 Scaffitig2 - Breakpoint: chr8:33210034

chr8:33209989-33210093

Overlap Length: 15 INS size: 289 Genotyped: Yes

```
left  AAGTTAT-----TTAACAATGT-----ATCA-AGCCAAGTATCCCATTTTTATTTTTGATTCTTTTT
chrom AAGTTAT-----TTAACAATGT-----ATCA-AGCCAAGTATCCCATTTTTATTTTTGATTCTTTTT
right CCGCCCGCCTCGGCCTCCCAAAGTGCTGGGATTACAGGCGTGAGCCACCGCGCCCGGCCGTGATTCTTTTT
      11*1111111111111111*11***1**1111111**1*1**1*11*111*1*111111111111*****
```

```
left  TTTTTTTTTTTTGAGACGGAGTCTCGCTCTGTCGCCAGGCTGGAGTGCAGTGGCACGATCTC
chrom TTTTAAATGA---ACCCACATAAGTGTATTTTCACTTATAATG-AG---AAAGACA-----
right TTTTAAATGA---ACCCACATAAGTGTATTTTCACTTATAATG-AG---AAAGACA-----
      ***222*22222*22*22*22222*222*2**2*22*222**2**222*22*2**2222222
```

Other Simple Repeat Low Complexity DNA LTR LINE SINE

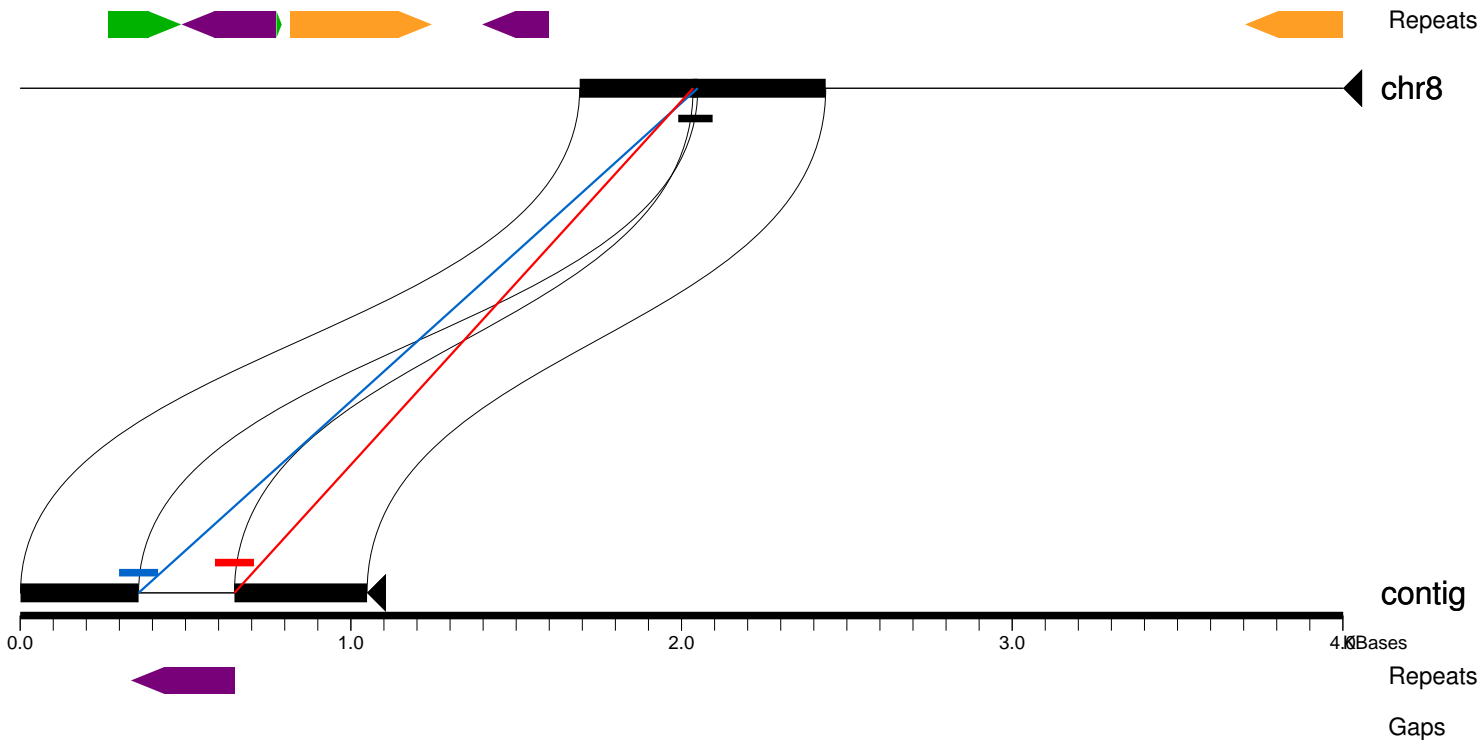



siteID: chr8\_34258124 Scafftig1 + Breakpoint: chr8:34258114

chr8:34258070-34258173

Overlap Length: 13 INS size: 305 Genotyped: No

```
left  TTCCTGAGTT----TACTACA---CTGAGGTTGCTTATGATAGTTATT-----CATGACAACATTCT
chrom TTCCTGAGTT----TACTACA---CTGAGGTTGCTTATGATAGTTATT-----CATGACAACATTCT
right CGCCCGCCTCGGCCTCCCAAAGTGTCTGGGATTACAGGCGTGAGCCACCGCGCCCGGCCCGACAACATTCT
      11**1*11*11111*1*1*1*111***1*1**1*1111*11**11*1111111111*11*****
```

  

```
left  TTTTTTTNNNNNNNNNNNNNNNNNNNNNNNNNNNNNNNNNNNNNNNNNNNNNNNNNNNNNNNNNNNNNN
chrom TTTATTCATGACAATTATGTGACCATATGTAAATAATAAAAAATACCATGA-----
right TTATTCATGACAATTATGTGACCATATGTAAATAATAAAAAATACCATGA-----
      **2**22*222222222222222222222222222222222222222222222222222222222222
```

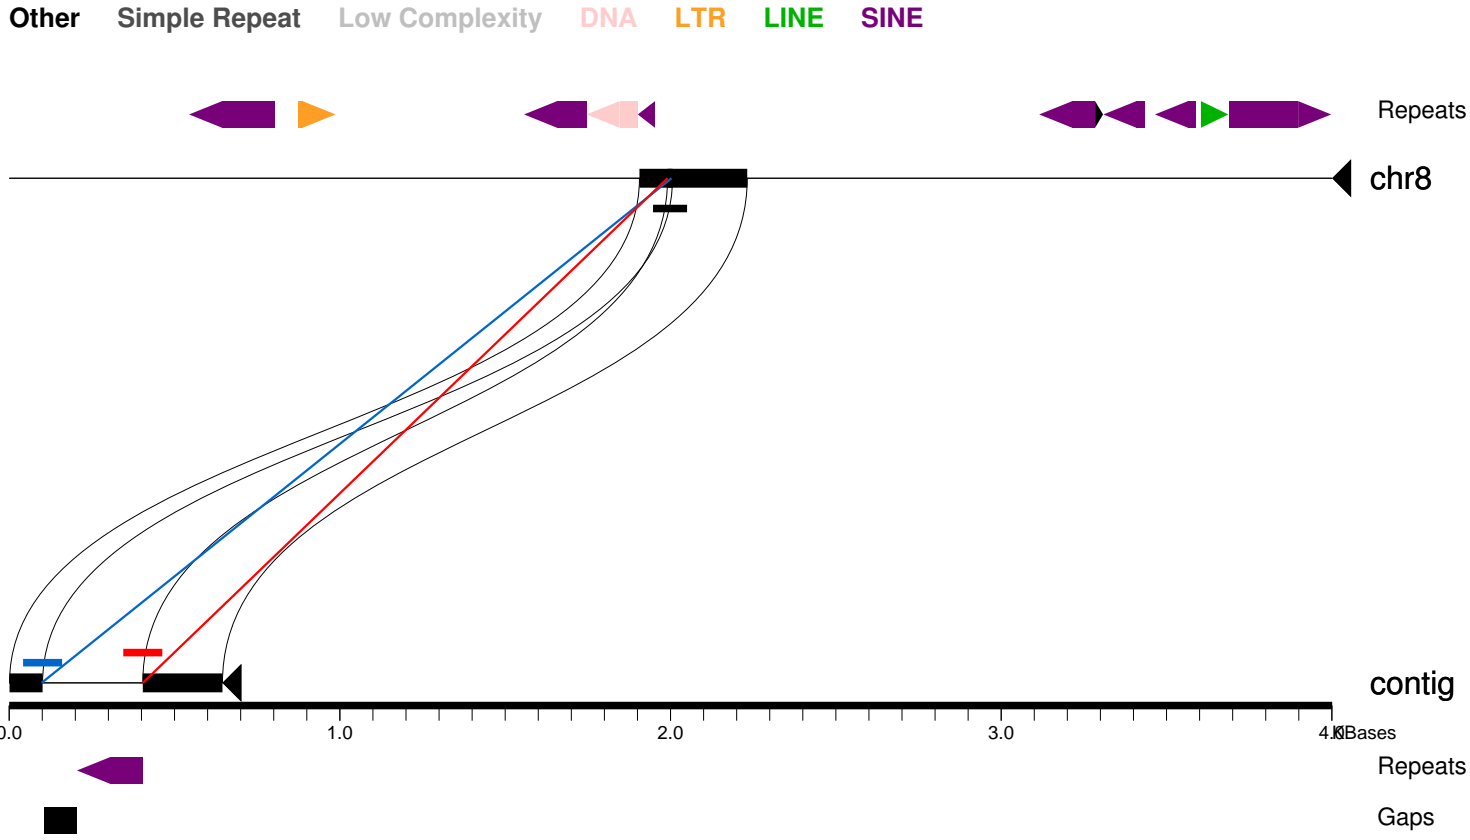



siteID: chr8\_35069017 Scaffitig6 - Breakpoint: chr8:35069023

chr8:35068978-35069082

Overlap Length: 15 INS size: 292 Genotyped: Yes

```
left  TACAACCATCTCATGATCACACAGGAAAAGAGAG-GACAT---GTCTGC-----AAAAGAGTAAC
chrom TACAACCATCTCATGATCACACAGGAAAAGAGAG-GACAT---GTCTGC-----AAAAGAGTAAC
right ATCCCGCCACTGCACTCCAGCCTGGGCGACAGAGCGAGACTCCGTCTCAAAAAAAAAAAAAAAA AAAAGAGTAAC
      11*111*11**111111**11*1**111*1****1**1*1111****1111111111111******
```

```
left  TCCCGGCCGGGCGCGGTGGCTCACGCCTGTAATCCCAGCACTTTGGGAGGCCGAGGCGGGCGG
chrom TCCCGTTTACAGCAATG-GAATCAGGACACTTATCACTAAA-----AGAATGACCA
right TCCCGTTTACAGCAATG-GAATCAGGACACTTATCACTAAA-----AGAATGACCA
      ***222222**222*2*22***2*2*22*2***2*222*222222222222222**222*2*22
```

Other Simple Repeat Low Complexity DNA LTR LINE SINE

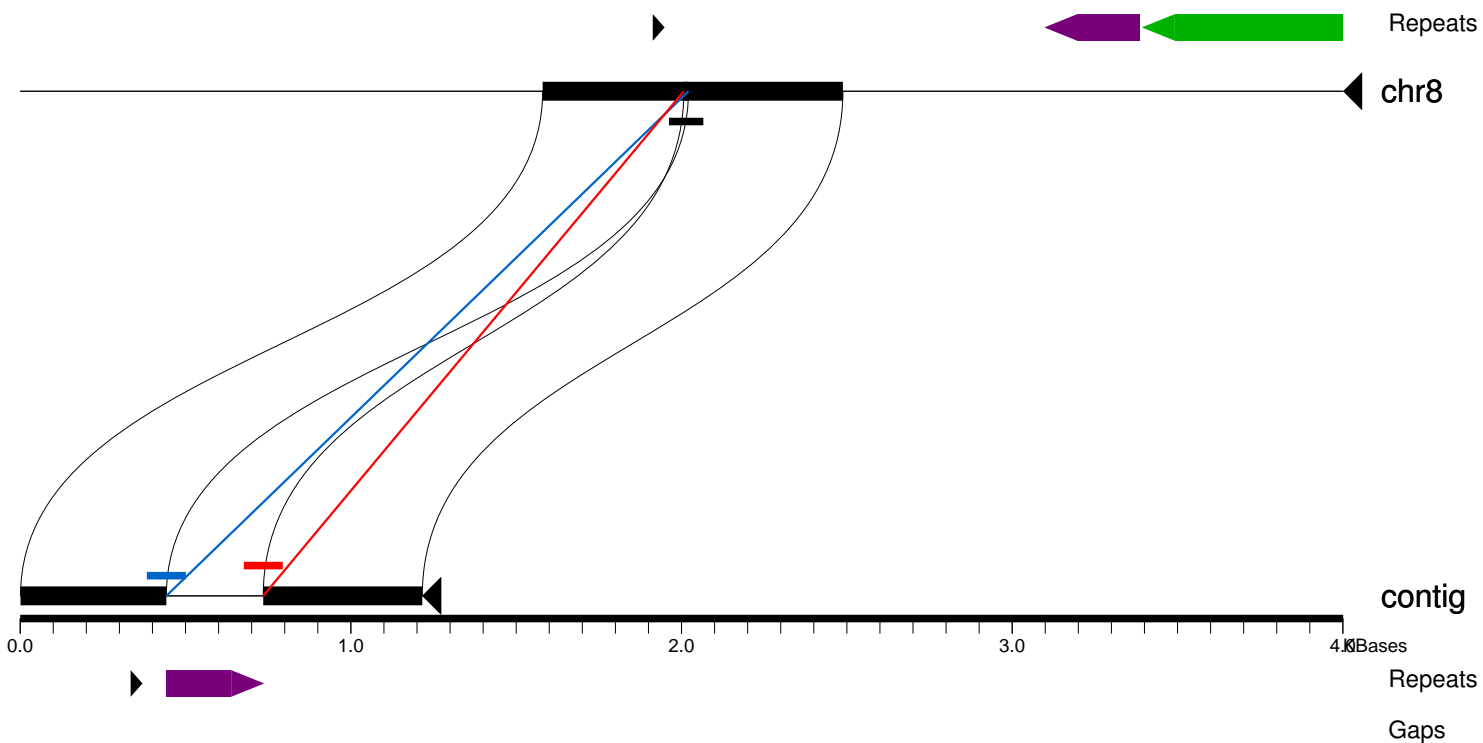

siteID: chr8\_38864072 Scaffitig12 - Breakpoint: chr8:38864061

chr8:38864018-38864120

Overlap Length: 17 INS size: 294 Genotyped: Yes

```
left  G-----ATTGGA-TCAAA---GGAGGAGAGTATGAGAGTAGGG-----AGACCAGGTAAAAAGGTATC
chrom G-----ATTGGA-TCAAA---GGAGGAGAGTATGAGAGTAGGG-----AGACCAGGTAAAAAGGTATC
right CGCGCCACTGCACTCCAGCGTGGGCGACAGAGCGAGACTCCGTCTCAAAAAAAAAAAAAAAAAAAAAAAGGTATC
      1111111*1**1*1**1*11111*11**1**111*****1*11*111111111*1*11*111*****
```

```
left  ATAGTCGGCCGG--GCGCGGTGGCTCACGCCCTGTAATCCCAGCACTTTGGGAGGCCGAGGCGGGCGG
chrom ATAGTCATCTAGAGGTGAGGTTAGTAAGG---GTTAAGCCA-----TTGGTAATAAT-----
right ATAGTCATCTAGAGGTGAGGTTAGTAAGG---GTTAAGCCA-----TTGGTAATAAT-----
      *****22*22*22*2*2***222*2*2*222**2*22***22222*****2*222222222222222
```

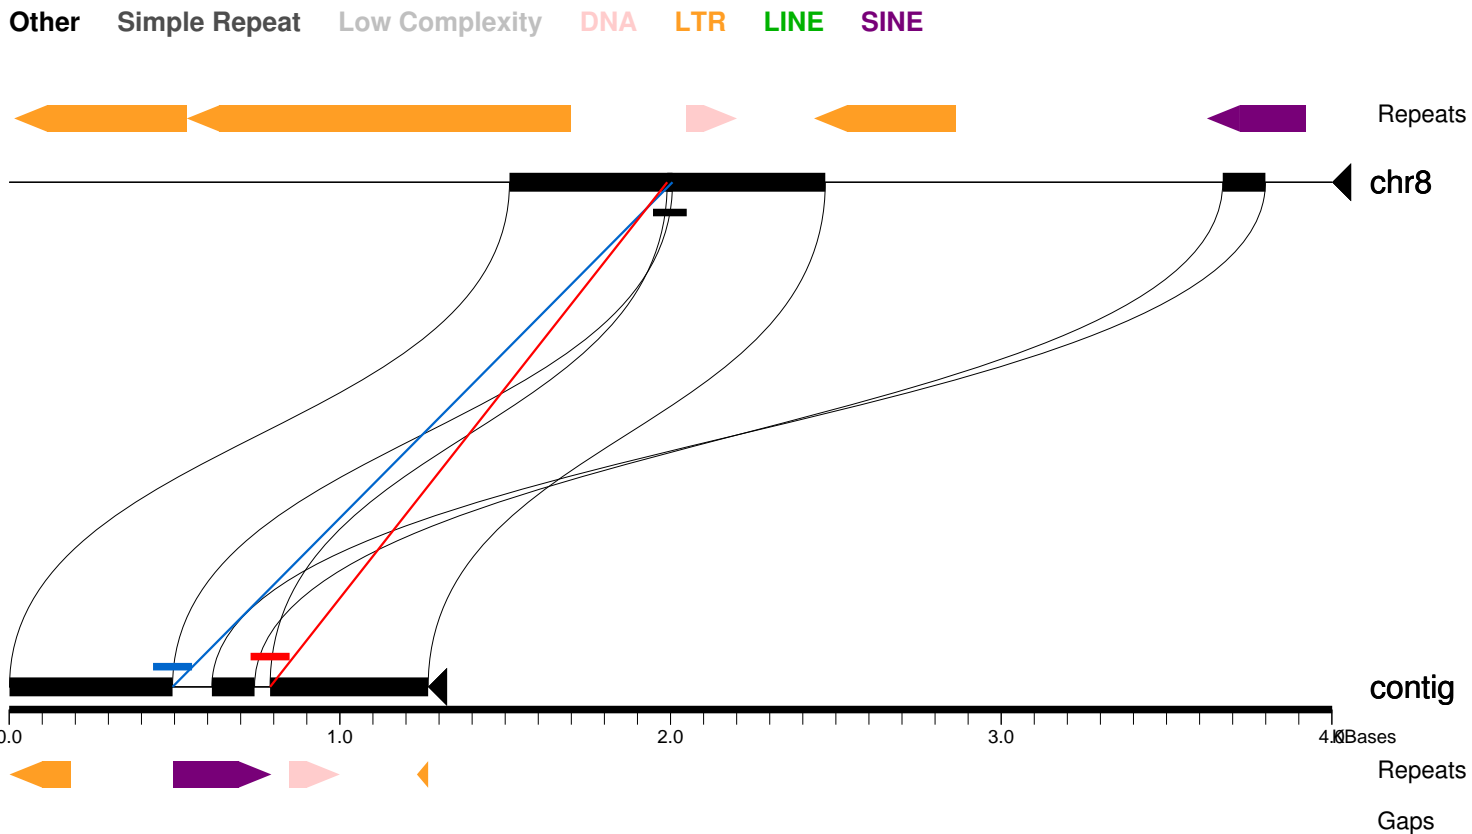







siteID: chr8\_49045483 Scaffoldig2 + Breakpoint: chr8:49045481  
chr8:49045443-49045540  
Overlap Length: 14 INS size: 458 Genotyped: No

```
left  ATG-----GCTT-----ATTCTCTGTTTAAATTCCTTAGAAAAGATAT-----TTTAATAAAAGT
chrom ATG-----GCTT-----ATTCTCTGTTTAAATTCCTTAGAAAAGATAT-----TTTAATAAAAGT
right CCGCCCGCCTCGGCCTCCCAAAGTGCTGGGATTACAAGCGTGAGCCACCGCGCCCGGCCTTTAATAAAAGT
      11*1111111111**1*111111*1*1**11*1***1*11*1*1**11*1111111111111111*****

left  TTTTTFTTTTTTTTNNNNNNNNNNNNNNNNNNNNNNNNNNNNNNNNNNNNNNNNNNNNNNNNNNNNNNNNNNNNNN
chrom TTTTATAATTTT-----CCTCACAAAAATCTTATTTATCTTTTGTAGATTTAGT
right TTTTATAATTTT-----CCTCACAAAAATCTTATTTATCTTTTGTAGATTTAGT
      **2*22***2222222222222222222222222222222222222222222222222222222222222222
```

Other Simple Repeat Low Complexity DNA LTR LINE SINE

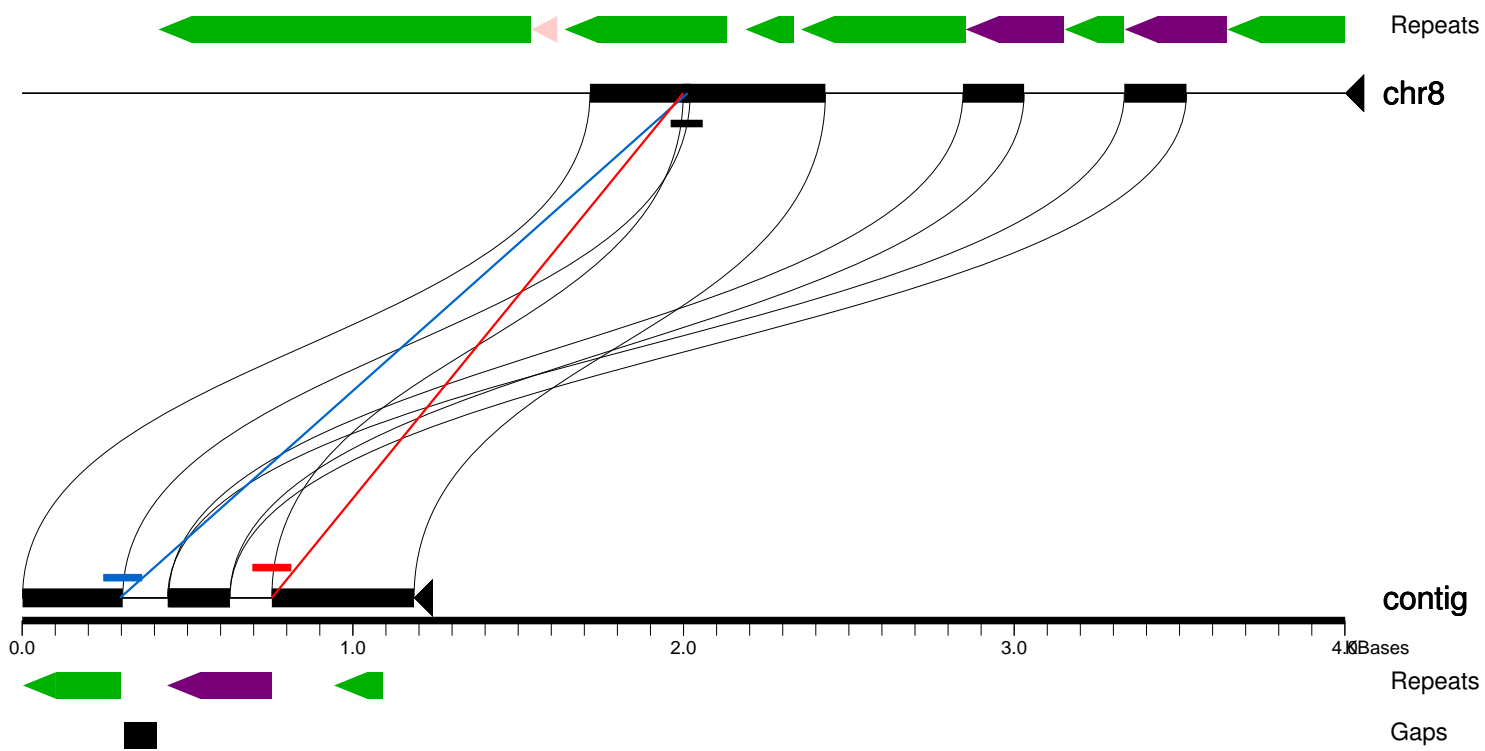

siteID: chr8\_50550385 Scaffoldig1 + Breakpoint: chr8:50550364

chr8:50550313-50550422

Overlap Length: 9 INS size: 361 Genotyped: No

```
left    TCAAAATGTT----TTTACATTTTCTT---TTA---GCATTTGCAACTACATACTATTTTGTGCTGAAT
chrom   TCAAAATGTT----TTTACATTTTCTT---TTA---GCATTTGCAACTACATACTATTTTGTGCTGAAT
right  CCGCCCGCCTCGGCCTCCCAAAGTGTCTGGGATTACAGGCGTGAGCCACCGCGCCCGGCCT-GTGCTGAAT
       1*11111111*111111*11**111*1**1111***111**1*11**1**11*111*1111*1*****
```

```
left    NNNNNNNNNNNNNNNNNNNNNNNNNNNNNNNNNNNNNNNNNNNNNNNNNNNNNNNNNNNNNNNNNNNNN
chrom   GCTTTTAAAAAGTATAGTTGTAATTTATTTTGTCTGTATTATTTATGATT-----
right  GCTTTTAAAAAGTATAGTTGTAATTTATTTTGTCTGTATTATTTATGATT-----
       22222222222222222222222222222222222222222222222222222222222222222222
```

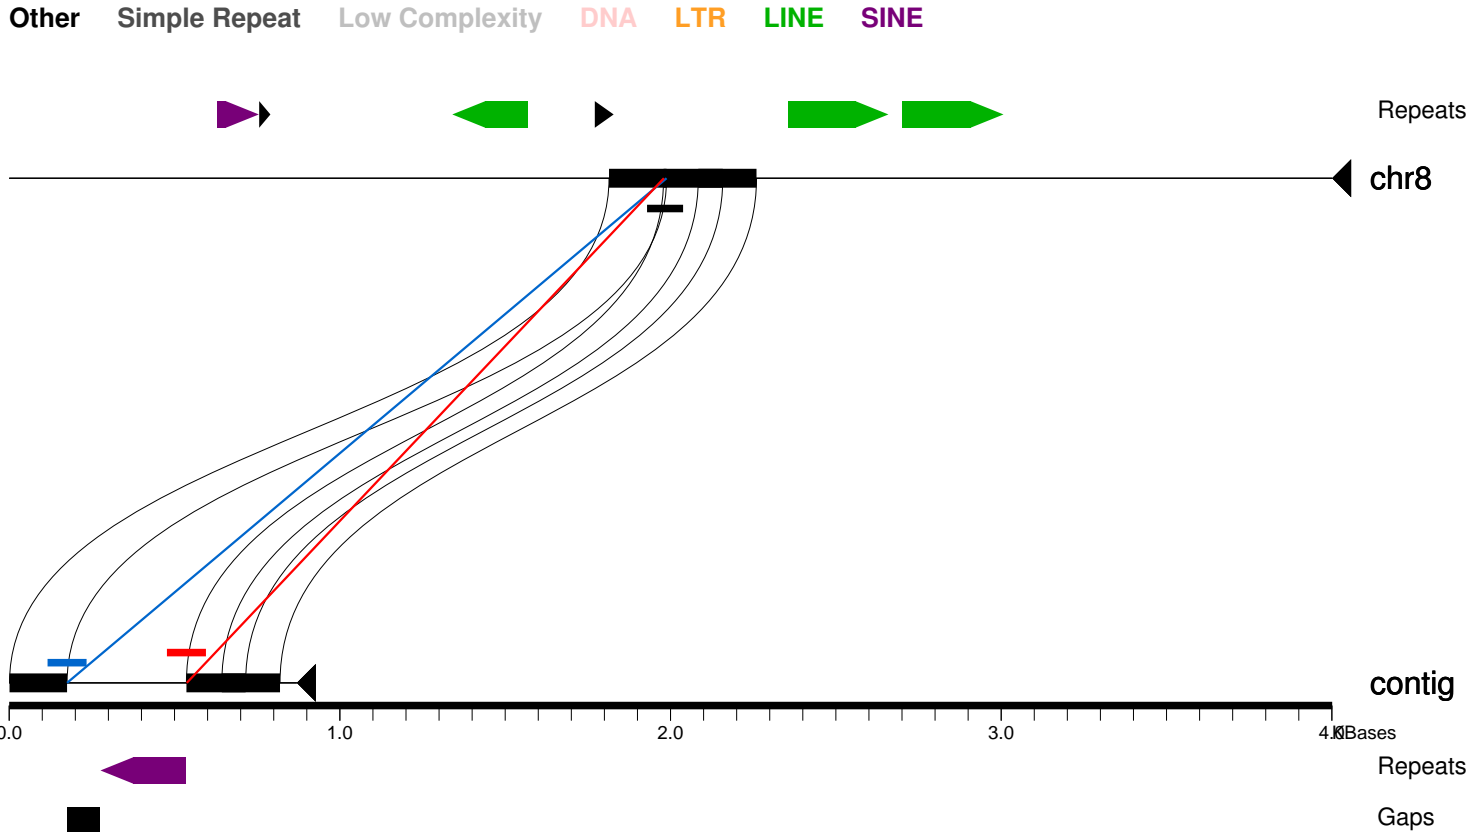

siteID: chr8\_51442451 Scafftig2 - Breakpoint: chr8:51442457

chr8:51442405-51442516

Overlap Length: 8 INS size: 415 Genotyped: No

```
left   TT----GTATTATTTT----AAGTA--TGGTTTCTAAGAGCAGGCCACTTTAGATAATTAAACAAAATAA
chrom  TT----GTATTATTTT----AAGTA--TGGTTTCTAAGAGCAGGCCACTTTAGATAATTAAACAAAATAA
right  CCACCCGCCTCGGCCTCCCAAAGTGCTGGGATTACAGGCGTGAGCCACC---GCGCCCGGCCCAAATAA
       111111*11*11111*1111****1111**1**11*1*1*111*****1111*1111111111*****
```

  

```
left   NNNNNNNNNNNNNNNNNNNNNNNNNNNNNNNNNNNNNNNNNNNNNNNNNNNNNNNNNNNNNNNNNNNNN
chrom  TACTTTTTATAAGGCTGTACATTTTCCTTTATAAAGTCTTAATGTTTCTGAA-----
right  TACTTTTTATAAGGCTGTACATTTTCCTTTATAAAGTCTTAATGTTTCTGAA-----
       2222222222222222222222222222222222222222222222222222222222222222222222
```

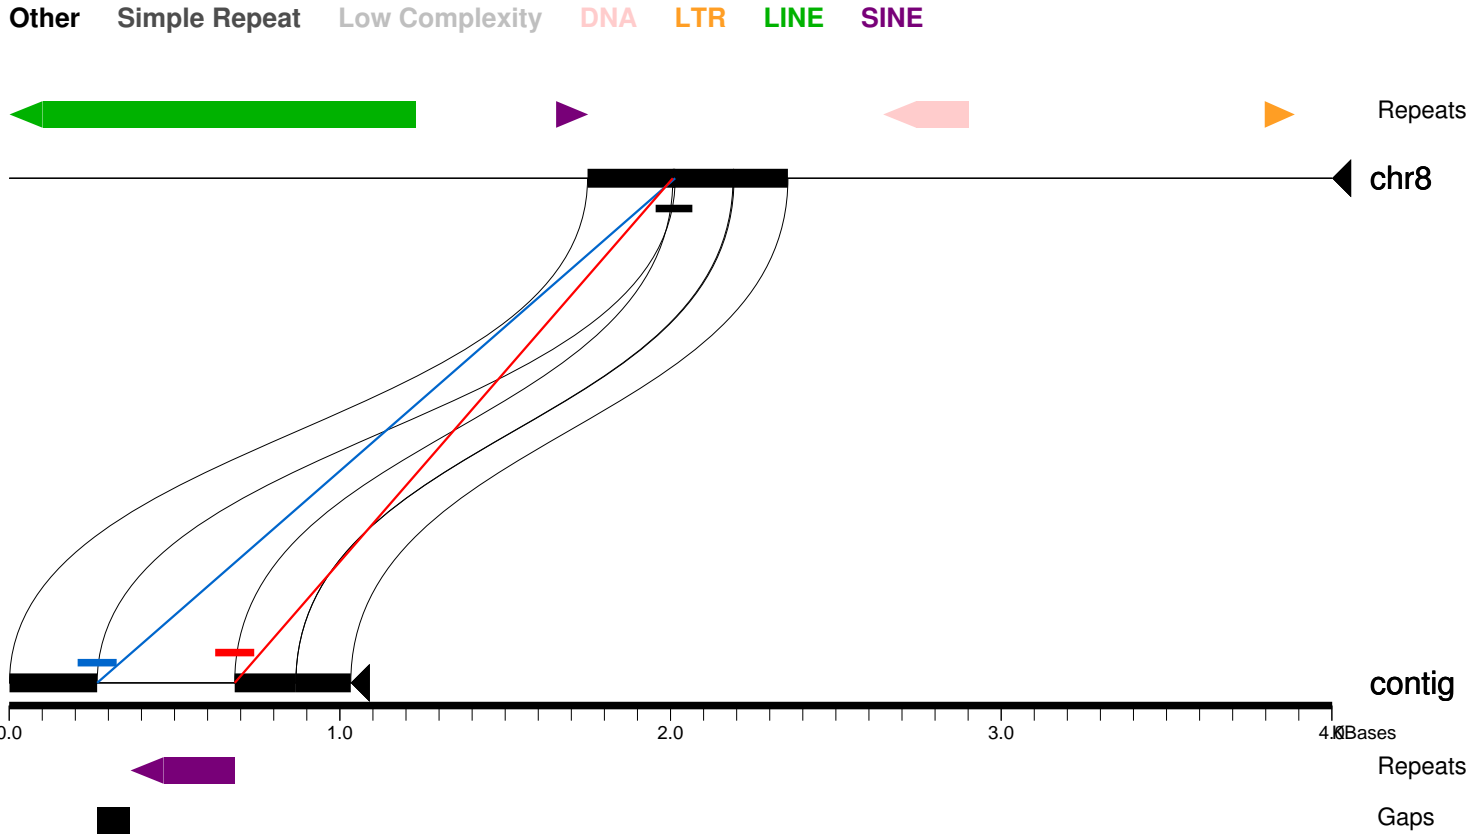

siteID: chr8\_53173024 Scaffitg3 - Breakpoint: chr8:53173018

chr8:53172971-53173077

Overlap Length: 13 INS size: 202 Genotyped: Yes

```
left  GTCTTGTTCCTTATTTATCATGTGACAT-GTGGCATCACCCAGCTGCATG-----AAATCTGGCTG
chrom GTCTTGTTCCTTATTTATCATGTGACAT-GTGGCATCACCCAGCTGCATG-----AAATCTGGCTG
right TCCAGCCTGGGCGACAGAGCGAGACTCCGTCTCAAAAAAAAAAAAAAAAAAAAAAAAAAAATCTGGCTG
      11*11111*11111111*11111*1***111**11**11*11*11111*11111111111111******
```

```
left  AACCCCGTCTCTACTAAAAATACAAAAAATTAGCCGGGCGTAGTGGCGGGCGCCTGTAG-TC
chrom AA----GATTC--CTTTGCACACTTTATAT--GCCTGATGAAGTGAAA----CTTTAGATC
right AA----GATTC--CTTTGCACACTTTATAT--GCCTGATGAAGTGAAA----CTTTAGATC
      **2222*22**22**2222*2**222*2**22***2*22*2***22222222**2***2**
```

Other Simple Repeat Low Complexity DNA LTR LINE SINE

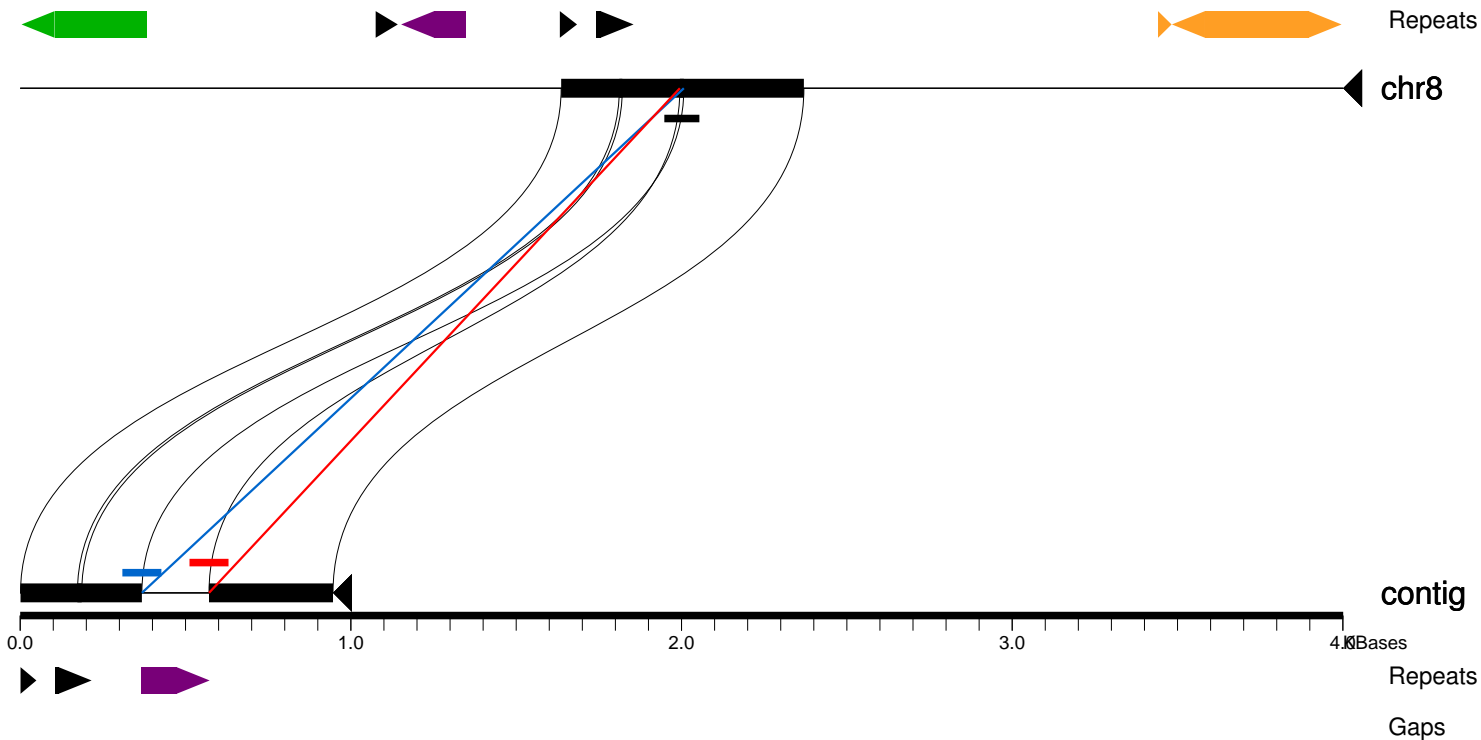

siteID: chr8\_53791044 Scaffitg2 - Breakpoint: chr8:53791041

chr8:53791001-53791087

Overlap Length: 13 INS size: 241 Genotyped: Yes

```
left -----ATTTTCATCATCATCATCAGTA-----TT----GTT-----GAAGGGCTAT
chrom -----ATTTTCATCATCATCATCAGTA-----TT----GTT-----GAAGGGCTAT
right TACGCCCGGCTAATTTTTTTTGT-ATTTTTAGTAGAGACGGGGTTTCACCGTTTTAGCCGGGATGGTCTCG
111111111111*1***11*11*1**11*1****1111111111**1111***1111111111**1**1**11
```

```
left TTTTAGCTGAATTTT*TTTTTTTTTTTTTTTTTTTTTTTTTTTTTTTTTTTTTGGAGACAGAGTCTCGCTCTGTT
chrom TTTTAGCTGAATTTT*TAATTTTTGTGAATCTGCT-----AGGTAAAATCACGTTT-----
right ATCTAGCTGAATTTT*TAATTTTTGTGAATCTGCT-----AGGTAAAATCACGTTT-----
1*1*****22*****2*222*2*22*222222222222222222**22*2*2**2**2*22222
```

```
left GCCCAGGCTGGA
chrom -----
right 2222222222222
```

Other Simple Repeat Low Complexity DNA LTR LINE SINE

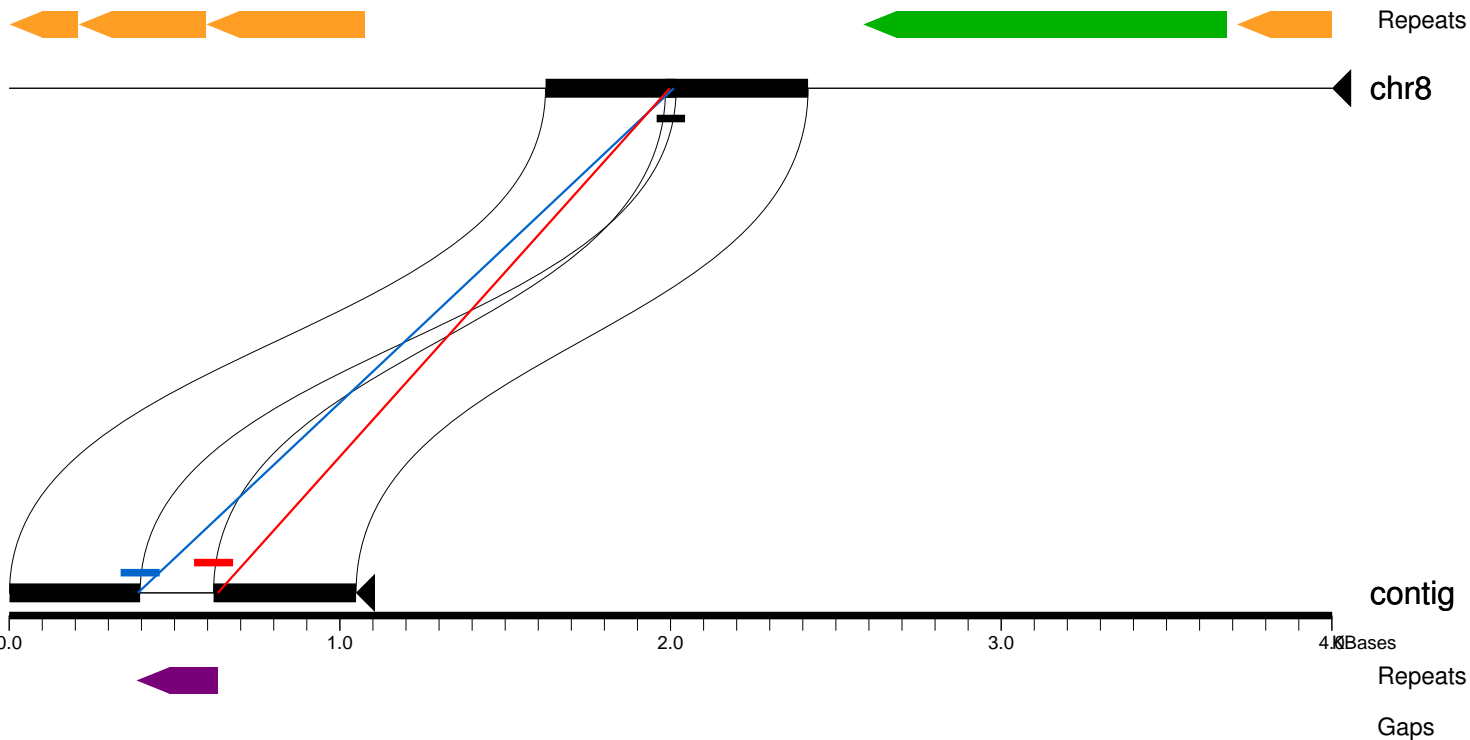

siteID: chr8\_5506280 Scaffitg1 - Breakpoint: chr8:5506268

chr8:5506215-5506327

Overlap Length: 7 INS size: 439 Genotyped: No

```
left  AGGCACACCTGTT-----AGAGCAAGCTATATATGCTCTAAGCCTCTTTGTTGCTTTTGAGAAATTC
chrom AGGCACACCTGTT-----AGAGCAAGCTATATATGCTCTAAGCCTCTTTGTTGCTTTTGAGAAATAT
right CCGCCCGCCTCGGCCTCCCAAAGTGCTGGGATTACAGGCG-TGAGCCACCGCGCC-CGGCCGAGAAATAT
      11**1*1***111111111111**1**11*111**1*1**11*1****1*111*111*1111*****22

left  CTGCTGAACCGCTCTTCCGATCNNNNNNNNNNNNNNNNNNNNNNNNNNNNNNNNNNNNNNNNNNNNNN
chrom TTTT-----GTTTTTCCTCCTAAAATGAAAATCAGCCAGAAAAGGAAGTCAAGGA
right TTTT-----GTTTTTCCTCCTAAAATGAAAATCAGCCAGAAAAGGAAGTCAAGGA
      2*22222222*2*2***22222222222222222222222222222222222222222222222
```

Other Simple Repeat Low Complexity DNA LTR LINE SINE

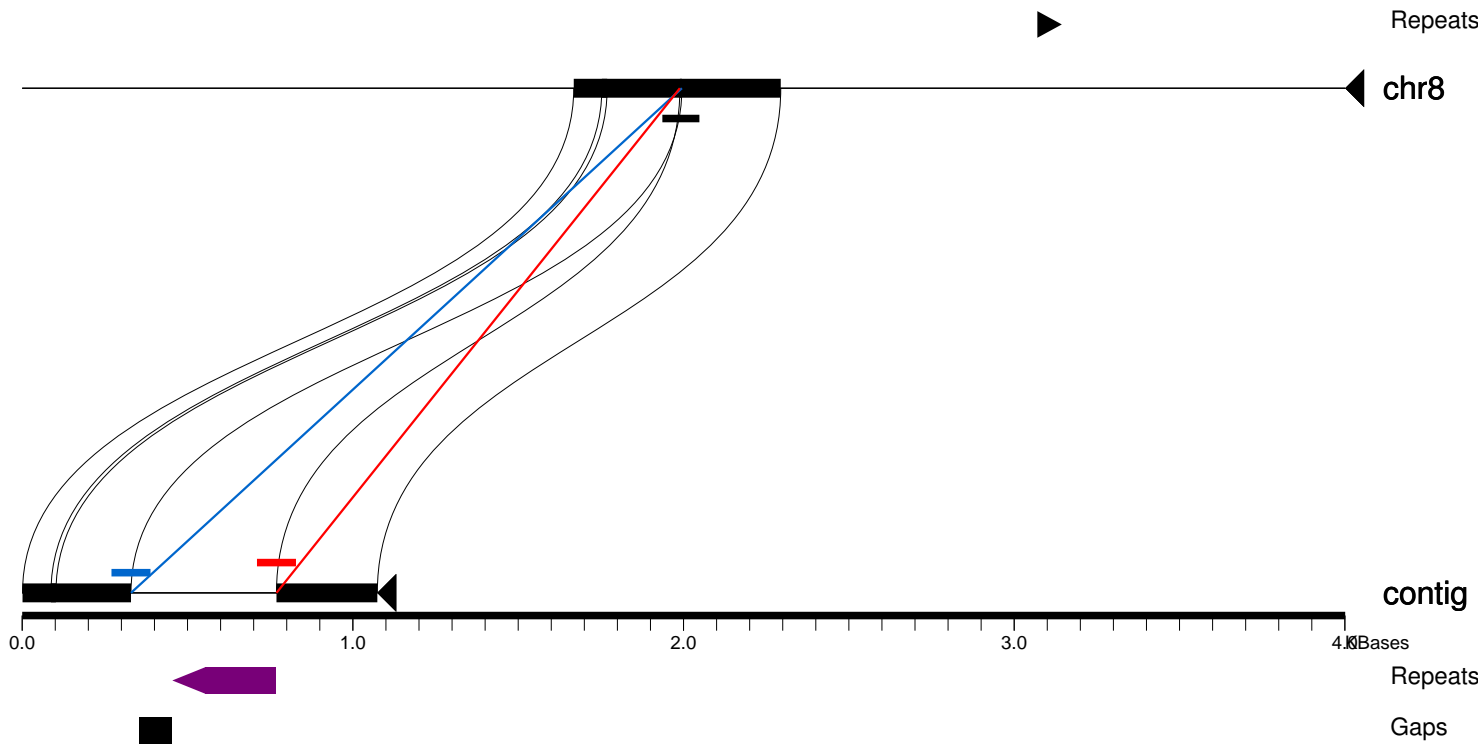







siteID: chr8\_59615993 Scaffoldig4 - Breakpoint: chr8:59615978

chr8:59615931-59616037

Overlap Length: 13 INS size: 309 Genotyped: Yes

```

left  TAGCAACA-----ACAAAATTAGACAT-GTATCAAAATGAGTGTTCCTTTTCAAAGTCA
chrom TAGCAACA-----ACAAAATTAGACAT-GTATCAAAATGAGTGTTCCTTTTCAAAGTCA
right AGTCCGCAGTCCGGCCTGGGCCACAGAGCGAGACTCCGTCTCAAAAAAAAAAAAAAAAAAAA---CAAAGTCA
      111*11**11111111111111111111***1*111****111**1*****11*1111111111111111*****
  
```

```

left  CAATA--GGCAGGGCGCGGTGGCTCACGCCTGTAATCCCAGCACTTTGGGAGGCCGAGGCGGGTGG
chrom CAATAATTGGCAAG-----TTGAACACT-----TACTAGAAAGATTTT-----ATCTAAAACAGTGAC
right CAATATTGGCAAG-----TTGAACACT-----TACTAGAAAGATTTT-----ATCTAAAACAGTGAC
      ****22****2*222222*2*22****22222*2*222*22*2***222222*22*22*2*2222
  
```

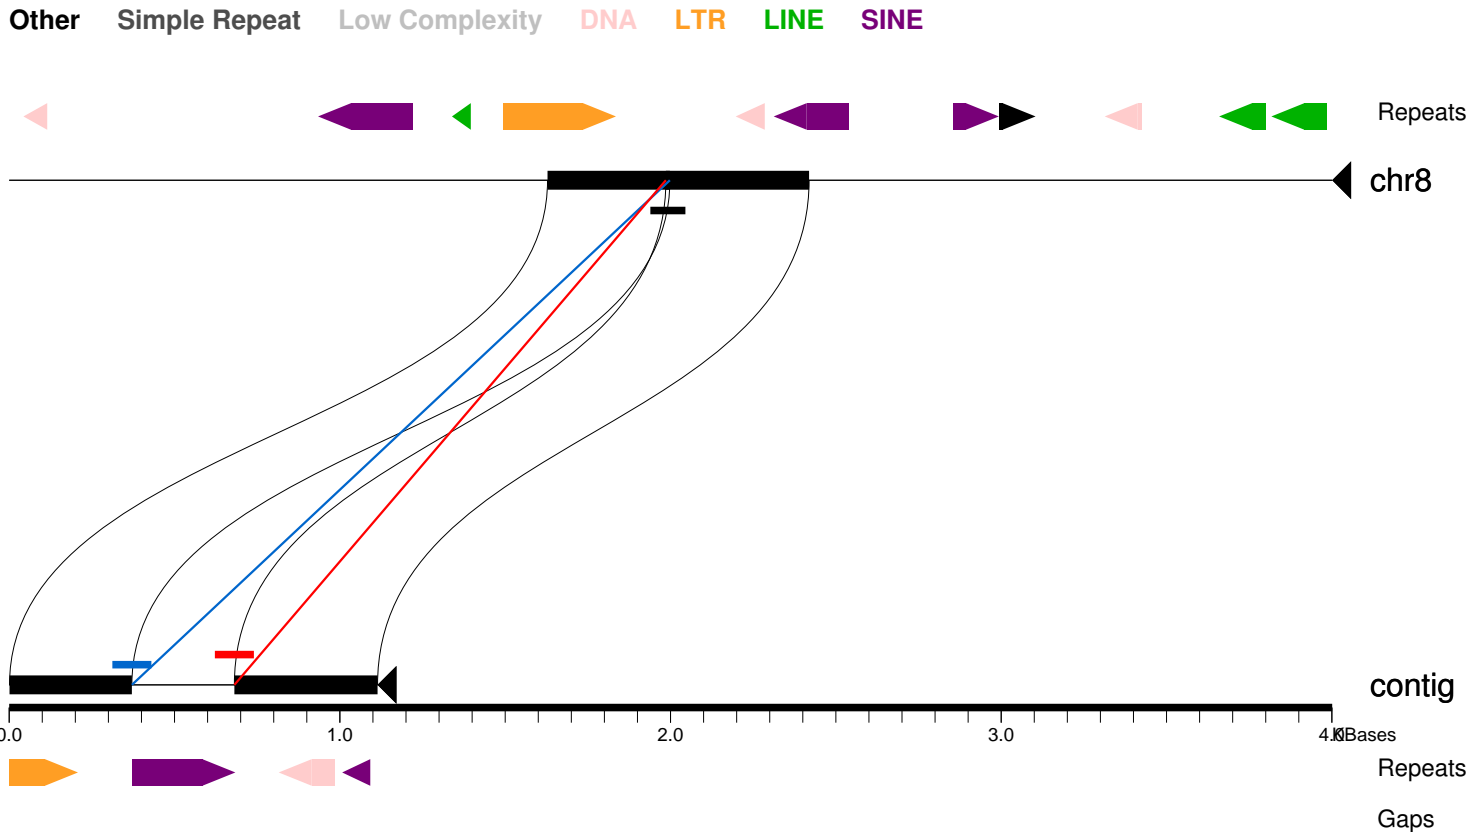



siteID: chr8\_59906439 Scaffold2 + Breakpoint: chr8:59906451

chr8:59906291-59906613

Overlap Length: 3 INS size: 409 Genotyped: No

```

left   ---AAATTAAGATGACAGACCTTTACTCTTGAGTCATTAGTTTTATCCTTTTATATGGATTGCATTCTCA
chrom  TTAAAATTAAAGATGACAGACCTTTACTCTTGAGTCATTAGTTTTATCCTTTTATATGGATTGCATTCTCA
right  NNNNNNNNNNNN-----
        NNN1111111111111111111111111111111111111111111111111111111111111111111
  
```

```

left   GTTACTGTAGAGGTTCTGGCAATTCATCATCTTCCTAAGGGGACCTAAGGGGAAAAGGCATCTTGCCA
chrom  GTTACTGTAGAGGTTCTGGCAATTCATCATCTTCCTAAGGGGACCTAAGGGGAAAAGGCATCTTGCCA
right  -----
        111111111111111111111111111111111111111111111111111111111111111111111
  
```

```

left   TACCTTGTTCAGAAATACAGAGAGGCGGGGCGGG--TGGCTCAC--GCCTGTA---ATCCCAGCA----
chrom  TACCTTGTTCAGAAATACAGAGGAAAGCATTCGCCGAATGGCTGAGTGCCAGTTGCCATGGCAGCATAAAA
right  -----GAAAAGCATTCGCCGAATGGCTGGGTGGCCAGTTGCCATGGCAGCATAAAA
        111111111111111111111111111111111111111111111111111111111111111111111
        222*222*2*2*22*****21222***2**2222**22*****2222
  
```

```

left   --CTTTGGGA---GGCCGAGGCGGGCGGATCAC-----GAGGTCAGG-----AGATC
chrom  GACGTTGTGAATTGGTCTACCTGTGGGAAAAATTTCCAAAAATAGAACACAGTCTATTTTTACCTAGATC
right  GACGTTGTGAATTGGTCTACCTGTGGGAAAAATTTCCAAAAATAGAACACAGTCTATTTTTACCTAGATC
        22*2***2**222**2*2*222*2*2*22*22222222222**222***222222222222*****
  
```

```

left   GA-GACC-ATCCTGGCTAACACGGTGAAACCCCGTCTCTACTAAA
chrom  CACGACATATTTCTTGCCAGTAT--TCATCAAGAGTTTCTAGAGAC
right  CACGACATATTTCTTG-----
        2*2***22**2**2*1N1NN1N221N1NNNNNN11N1111NNN1N
  
```

Other Simple Repeat Low Complexity DNA LTR LINE SINE

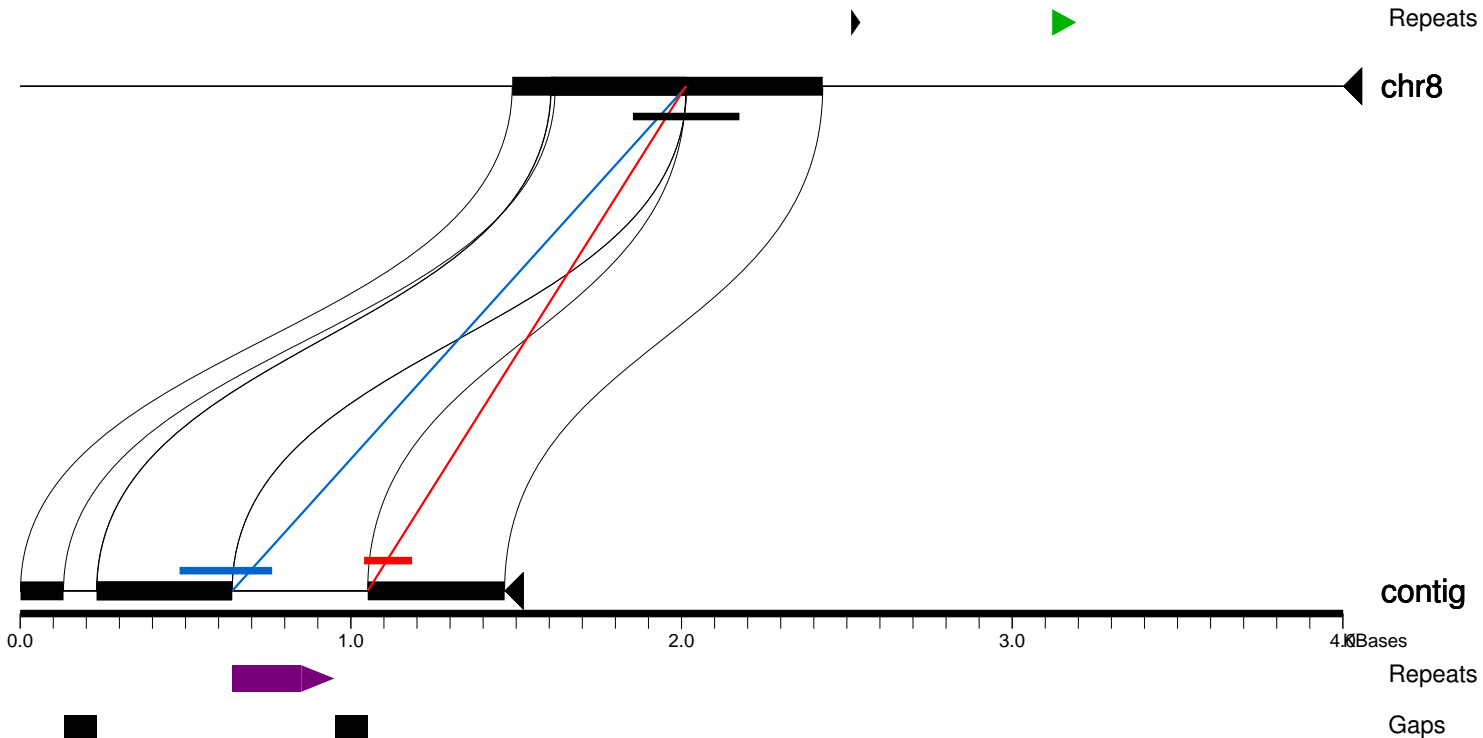

siteID: chr8\_6044976 Scaffoldig6 - Breakpoint: chr8:6044960

chr8:6044918-6045019

Overlap Length: 18 INS size: 300 Genotyped: Yes

```
left   TCCACTCACCAGCC-----GTCCATTAGTTCTTC-----AGAAGTATTGATCAATATGCAA
chrom  TCCACTCACCAGCC-----GTCCATTAGTTCTTC-----AGAAGTATTGATCAATATGCAA
right  TGCACTC--CAGCCTGGGCGACAGAGCGAGACTCCGTCTCAAAAAAAAAAAAAAAAAAAAAAAAAAAATATGCAA
      *1*****11*****1111111111*11*111*1*1*1**1111111111*1**11*111*11*****
left   CACTTAAGGCCGGGCGCGGTGGCTCACGCCTGTAATCCCAGCACTTTGGGAGGCCGAGGCGGGCGGAT
chrom  CACTTAAGGTT-----TCAAACAACACTTAAAT----GCAATTTTTTGA----AGGTATCTCAAG
right  CACTTAAGGTT-----TCAAACAACACTTAAAT----GCAATTTTTTGA----AGGTATCTCAAG
      *****2222222222*2222**222**22***2222***2***22**22222***2222222*2
```

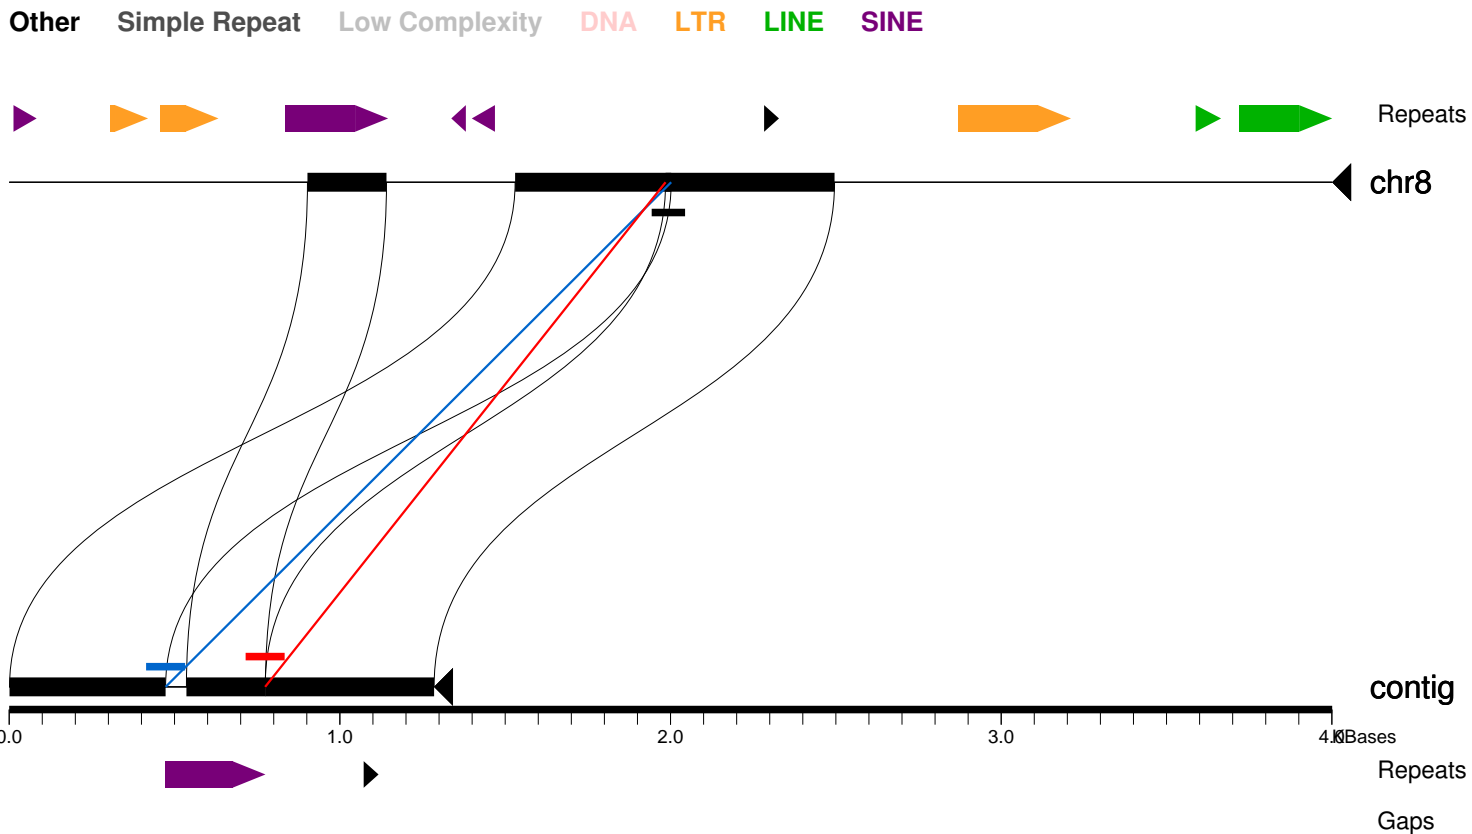

siteID: chr8\_61194851 Scaffold2 - Breakpoint: chr8:61194841

chr8:61194794-61194900

Overlap Length: 13 INS size: 298 Genotyped: Yes

```

left  CCTTAAACGT--GCTTCTC--AGT-CTAGTGTTAACGACTTCAGCC-----CTCTGT-TCCTGTGCCTT
chrom CCTTAAACGT--GCTTCTC--AGT-CTAGTGTTAACGACTTCAGCC-----CTCTGT-TCCTGTGCCTT
right CCGCCCGCCTCGGCCTCCCAAAGTGCTGGGATTACAGGCGTGAGCCACCGCGCCCGGCCTCCTGTGCCTT
      **11111*1*11**1**1*11***1**1*11***11*1*1*1***111111*1*1*11*****

```

```

left  TTTTTTTTTTTTTTTTTTTTTGAGACGGAGTCTCGCTCTGTCGCC--AGGCTGG---AGTGCAG----TGG
chrom TT-----AAA---AGCCCTGGTCAGTAACCCCTAAGTAGGTAACTCCACATTTTTA
right TT-----AAA---AGCCCTGGTCAGTAACCCCTAAGTAGGTAACTCCACATTTTTA
      **22222222222222222222*2*222**2*22*2**2**22***22*2*22**222*2*2**22222*22

```

Other    Simple Repeat    Low Complexity    DNA    LTR    LINE    SINE

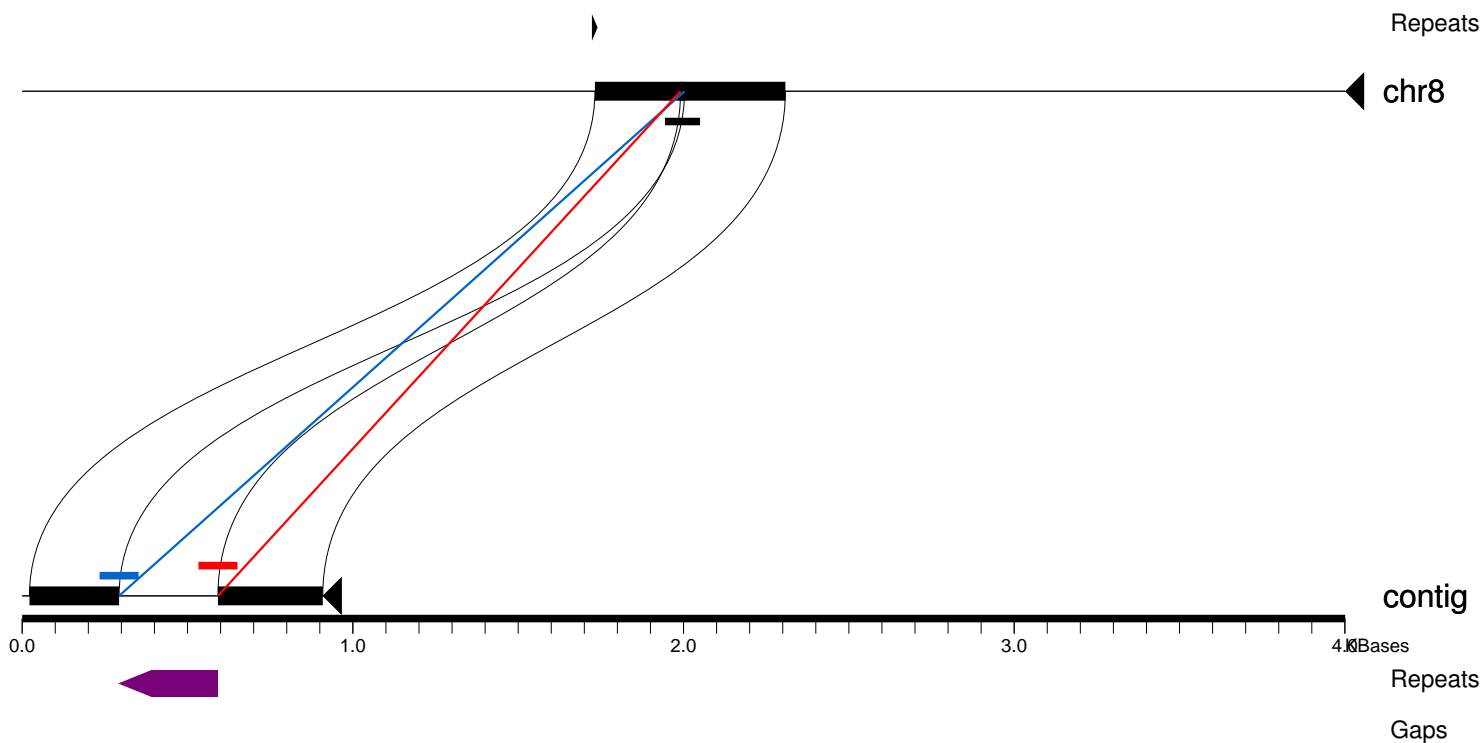

**siteID: chr8\_61526780 Scaffitg2 - Breakpoint: chr8:61526780**  
**chr8:61526738-61526839**  
**Overlap Length: 18 INS size: 308 Genotyped: Yes**

```

left  TAAAGACCC-----TGTTAGCACAATATCCGTGAG--ACCTGCCTTAATCCAGCCCTGCA
chrom TAAAGACCC-----TGTTAGCACAATATCCGTGAG--ACCTGCCTTAATCCAGCCCTGCA
right TCCGCCCGCCTCGGCCTCCCAAAGTGCTGGGATTACAGGCGTGAGCCACCGCGCCCGGC**CAGCCCTGCA
      *11111*1*1111111111111111111**1*1*1*11*1*11*****11***111*11111*****
left  TTCTTCTTTTTTTTTTTTTTTTTTTTTTTTTTTTTTTTGGAGACGGAGTCTCGCTCTGTCGCCCAGGCTG
chrom TTCTTCTATCGGTTAGTGCAGAAAGTTTTTTTTTCTT-----CCATCTTT-----ATGGAG
right TTCTTCTATCGGTTAGTGCAGAAAGTTTTTTTTTCTT-----CCATCTTT-----ATGGAG
      *****2*222**22*22222222*****2**222222222222*22***2*22222*2*22*
  
```

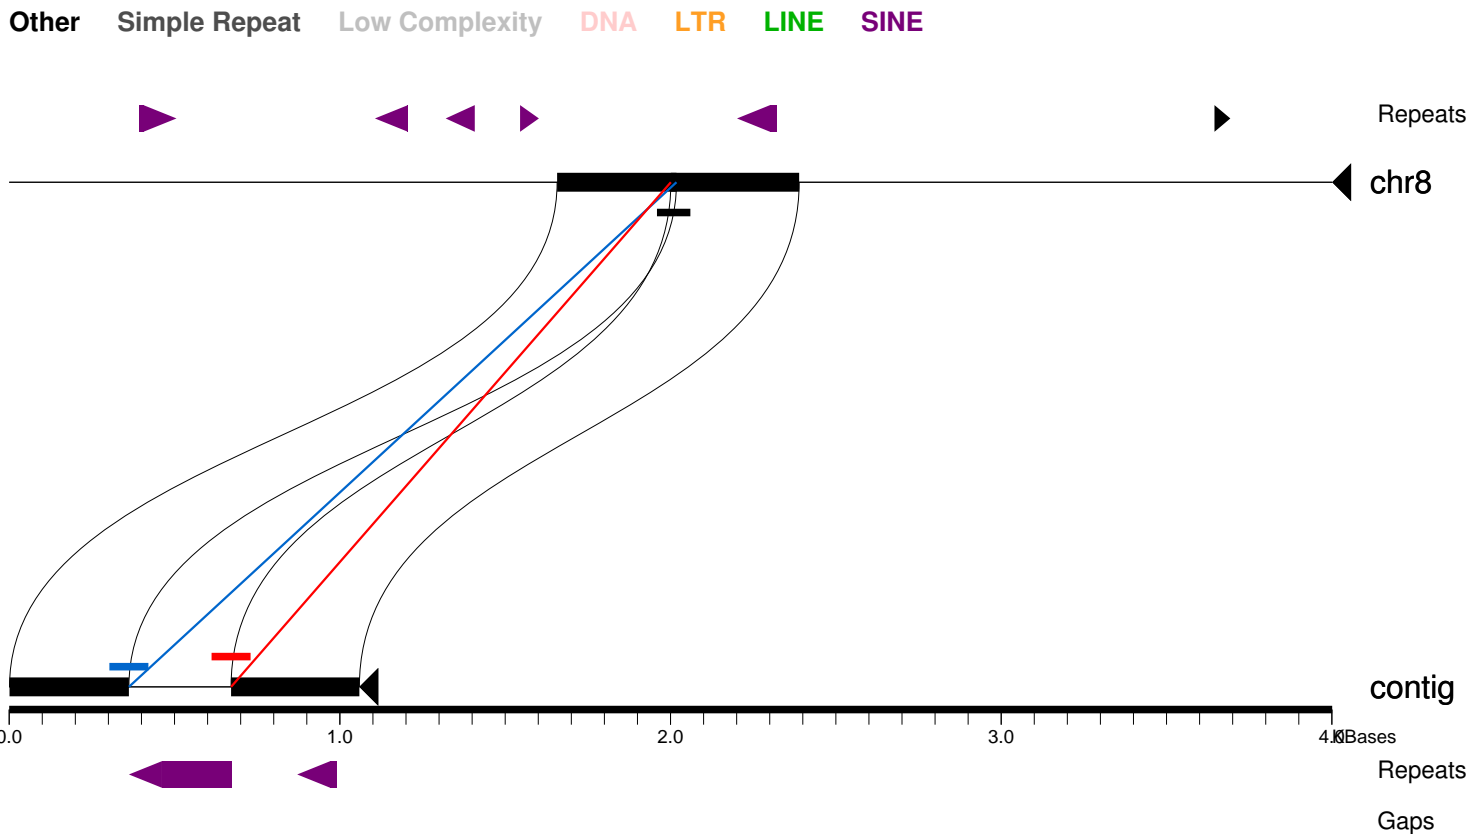







siteID: chr8\_68981806 Scaffold5 - Breakpoint: chr8:68981793

chr8:68981749-68981852

Overlap Length: 16 INS size: 315 Genotyped: Yes

```
left  TATAGATGTATTACTGTATTGGTATATTTTGTTT-----AATTTACGTTAGAAATTT
chrom TATAGATGTATTACTGTATTGGTATATTTTGTTT-----AATTTACGTTAGAAATTT
right CCGGCCTGGGCGACAGA---GCGAGACTCCGTCTCAAAAAAAAAAAAAAAAAAAAAAAAAAAGAAATTT
      111111**1111**1*1111*11*1*1*11**1*11111111111111111111**111*1111*****
```

```
left  TATATTTTGGCCGGGCGCGGTGGCTCACGCCTGTAATCCCAGCACTTTGGGAGGCCGAGGCGGGTGG
chrom TATATTTTAA----GAAACATAATTTAGAA---AAATCTTTGTATGTGTGTATGTCATA-----
right TATATTTTAA----GAAACATAATTTAGAA---AAATCTTTGTATGTGTGTATGTCATA-----
      *****222222*22222*222*2*222222*****222*2*22*2*2*2*22222222222
```

Other Simple Repeat Low Complexity DNA LTR LINE SINE

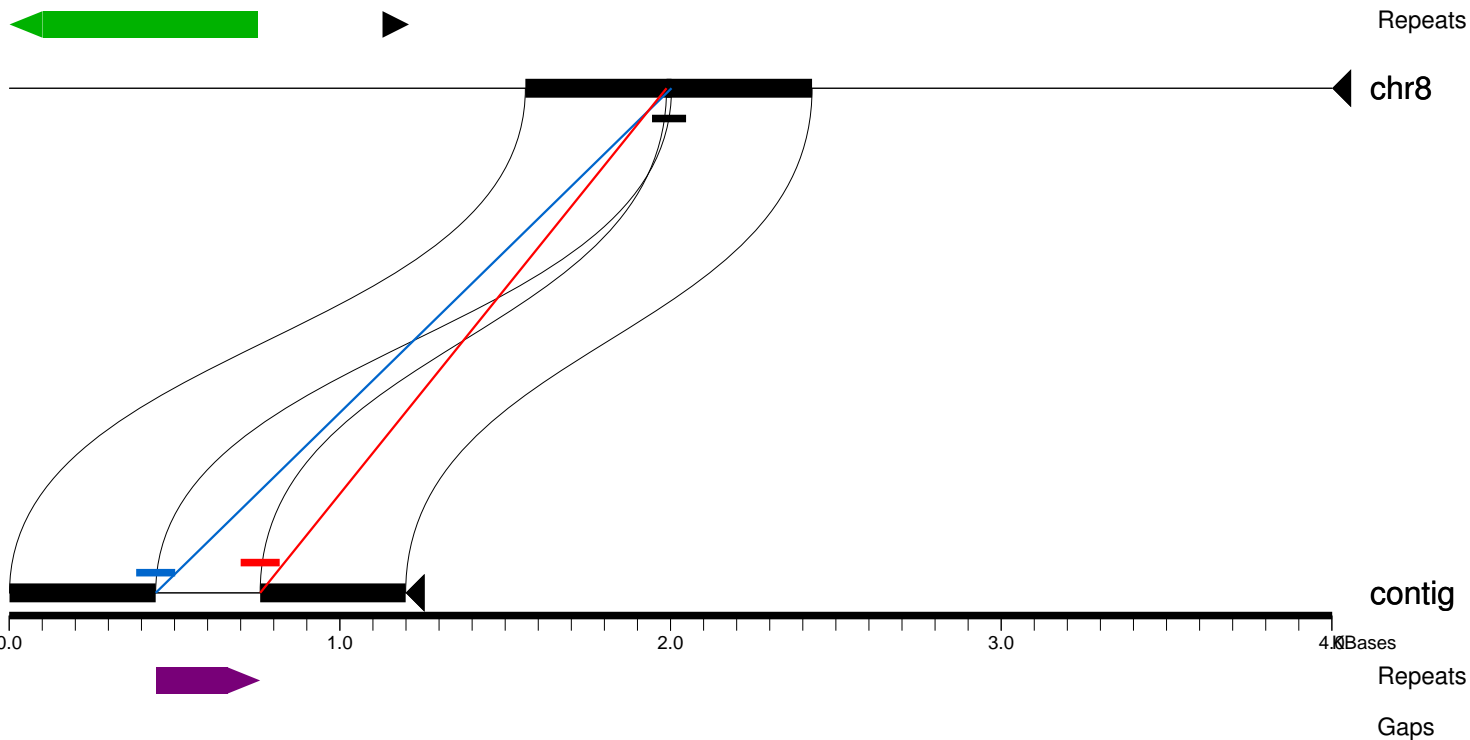

siteID: chr8\_71774804 Scafftig1 + Breakpoint: chr8:71774791

chr8:71774748-71774850

Overlap Length: 14 INS size: 302 Genotyped: Yes

```
left  TTTGAATGTAATTGTTCTTTAAAA---CACATATTATA--CTTAA--CAT-----CTGTTTCATAT
chrom TTTGAATGTAATTGTTCTTTAAAA---CACATATTATA--CTTAA--CAT-----CTGTTTCATAT
right TCCGCCCGCC-TCGGCCTCCCAAAGTGCTGGGATTACAGGCGTGAGCCACCGCGCCCGGCCTGTTTCATAT
      *11*111*111*1*11**111***111*1111****1*11*1*1*11**111111111111*****

left  TTTTTTTTTTTTTTTTTTTTTTTTTTTTTTGAGACGGAGTCTCGCTCTGTCGCCCAGGCTGGAGTGCAGTG---
chrom TTTTCTT-----AGAGGCAGTATGGTTTAAATAAAAAAGAACTTTAATTCATTAAAC
right TTTTCTT-----AGAGGCAGTATGGTTTAAATAAAAAAGAACTTTAATTCATTAAAC
      ***2**222222222222222222222222***2*2**2*2*2*222*22222222**22*2*2**2*2222
```

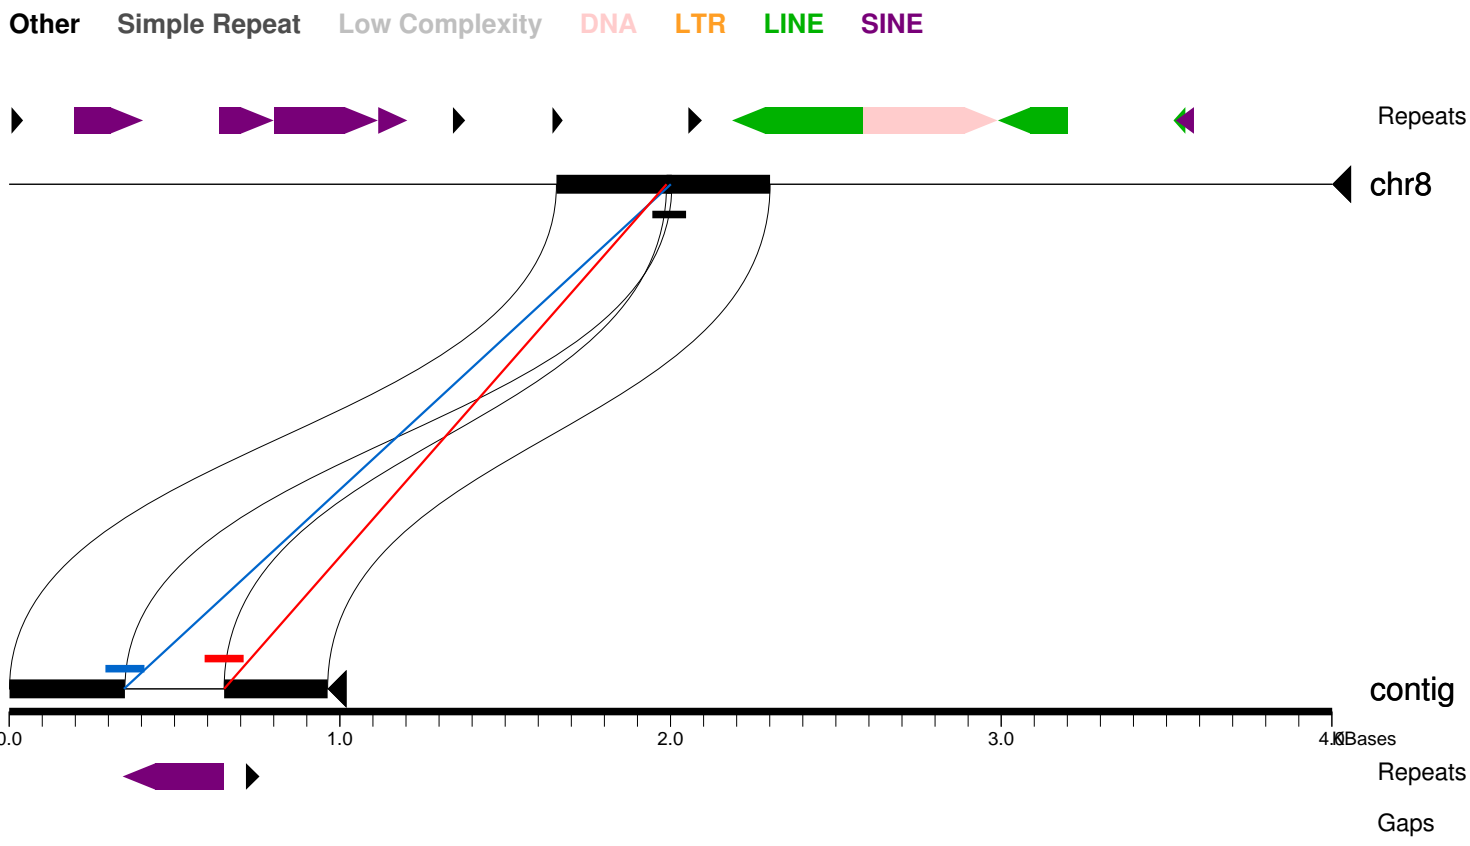

siteID: chr8\_71914580 Scaffitg1 - Breakpoint: chr8:71914579

chr8:71914419-71914751

Overlap Length: 13 INS size: 321 Genotyped: Yes

```
left -----GTTAATTCATCATGTCCTAACAGGCTGGGTCAGTGGTCAAATTTGTTGGAGAGATTG
chrom TTTAGTAAATGTAGTTAATTCATCATGTCCTAAATAGGCTGGGTCAGTGGTCAAATTTGTTGGAGAGATTG
right C---GTGAACCCGGG-AAGCGGAGCTTG-----CAGTGAGCCGA--GATTGCGCCACTG
N 22N22NNNN*11**1111*1*1**11111N111111111*****11*11*11*1*1*1*1*1**
```

```
left GGGTTGACGATAGTCTATAAACTACGAGGAAGGGCTCACCATATGTGGTAAGAGTTTTGTTTCAAATAAT
chrom GGGTTGACGATAGTCTATAAACTACGAGGAAGGGCTCACCATATGTGGTAAGAGTTTTGTTTCAAATAAT
right CAGTCCGC---AGTCCC--ACCTGGGCGACAGAGCGAGAC-TCCGTCTCAAAAAAAAA-----AAATAAA
11**1111*1111****11111*1**11*1*11**1**1111*1*11**1111*1*1111111111*****1
```

```
left TTTAATCTAATTTAATGTTTAAAAATAAAAGCTAG-GCCGGGCGCGGT----GGCTCACGCCCTG---TAAT
chrom TTTAATCTAATTTAATGTTTAAAAATAAAAGCTAAAGCCGTGGTAGGTTTTTGTTTTTTTTCCGAAATAAT
right TA-AATAAAAAATAAAAA---AAAATAAAAGCTAAAGCCGTGGTAGGTTTTTGTTTTTTTTCCGAAATAAT
*11**11**11**11**111111*****22****2*222**222*22*2222*2*222****
```

```
left CCCAGCACT-----TTGGGAGGCCGAGGCCGGTGGATCATGAGGTCAGGAGAT
chrom TCCAGTTGTGTTTATCTATATTATTTTTCTTTTAGTATGTTCTGTCTC-TCAATTAACAGCATAGTATAT
right TCCAGTTGTGTTTATCTATATTATTTTTCTTTTAGTATGTTCTGTCTC-TCAATTAACAGCATAGTATAT
2****222*22222222222222222222**2*2*2*2222*2*222*22**2*22**222**2*2**
```

```
left ---CGAGACCATCTGGCTAACA-----AGGTGAAACCCCGTCTCTACTAAA-
chrom TAGCTTTCCAATTTCTGTTTATTGTATCTTTAAGT-AAAATTTAATTTATATAAAAAAT
right TAGCTTTCTAATTTCTGTTTATTGTATCTTTAAGT-AACTT-----
222*222212**2**22**2222222222*2**2***N22NN1N1N11NN111
```

Other Simple Repeat Low Complexity DNA LTR LINE SINE

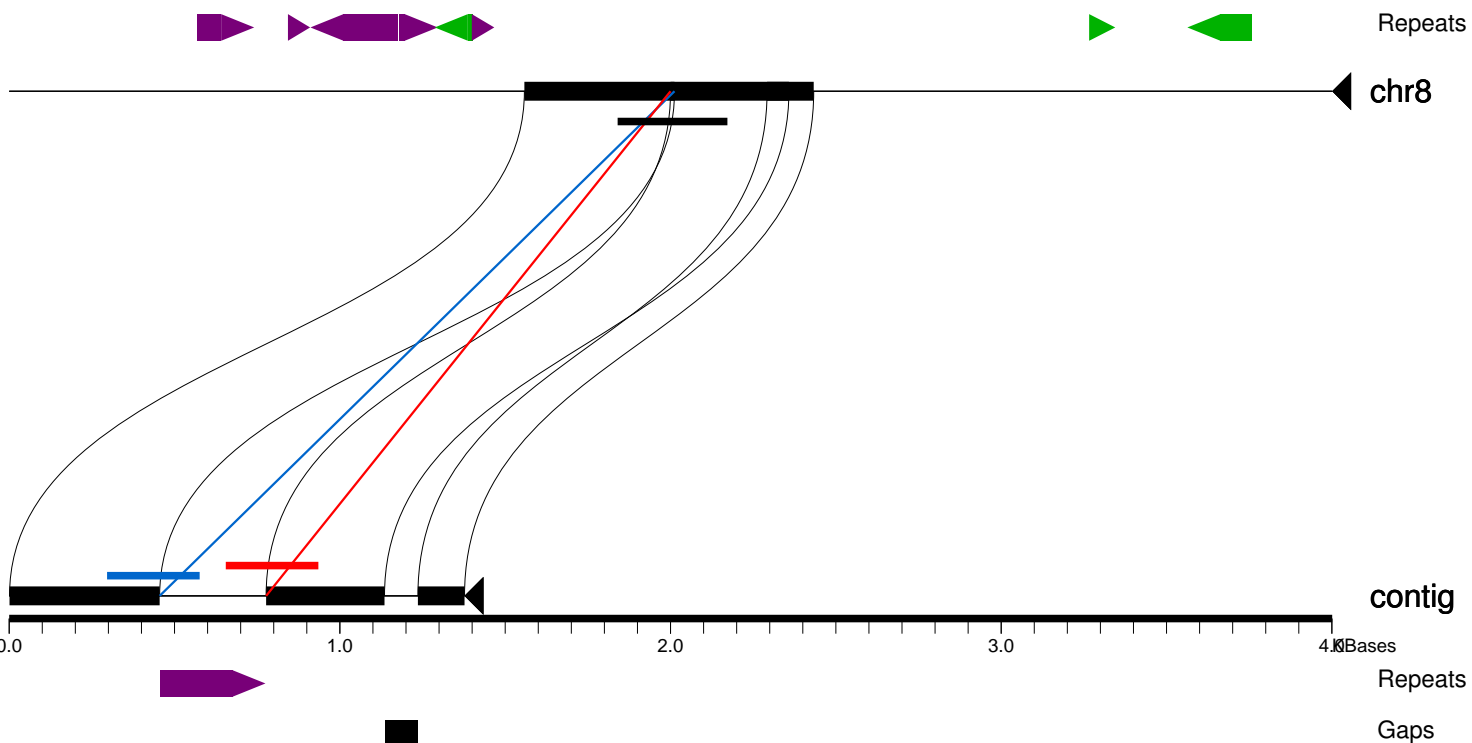

siteID: chr8\_72510295 Scaffitg2 - Breakpoint: chr8:72510303

chr8:72510254-72510359

Overlap Length: 10 INS size: 307 Genotyped: Yes

```
left  AGCATGTCCTGGATGCTATGGGAAAG---GTGATGTCAGCTCAGAGGGTC-----AAGAATG
chrom AGCATGTCCTGGATGCTATGGGAAAG---GTGATGTCAGCTCAGAGGGTC-----AAGAATG
right -GCA---CTCCAGCCTGGGCGACAGAGCGAGACTCCGTCTCAAAAAAAAAAAAAAAAAAAAAAAAAAATG
      1***111**11*11**11*1**1**111*1**111*11****1*11111111111111111111**1****
```

```
left  GGCTCTCGGCCGGGCGCGGTGGCTCACG-CCTGTAATCCCAGCACTTTGGGAGGCCGAGGCGGGCGG
chrom GGCTCT---CCGAG-GAGGTGACATTTGACCTGAGAT----GTACATGATGAGAGAGAGAC-----
right GGCTCT---CCGAG-GAGGTGACATTTGACCTGAGAT----GTACATGATGAGAGAGAGAC-----
      *****222***2*2*2*****2*2222*2*****22**2222*2**2*222***222***2*222222
```

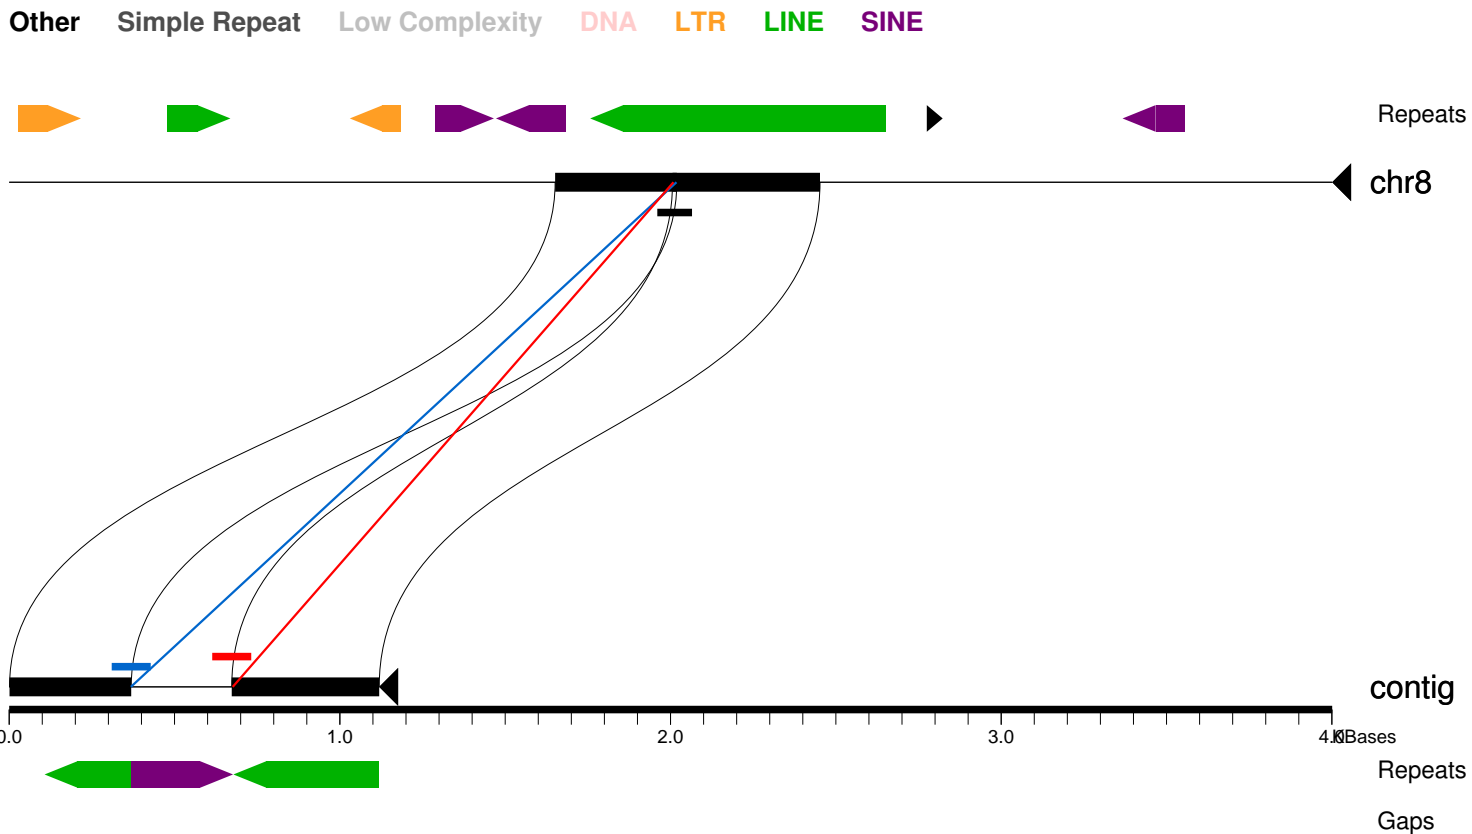







siteID: chr8\_75062575 Scaffitig6 - Breakpoint: chr8:75062560

chr8:75062514-75062616

Overlap Length: 14 INS size: 306 Genotyped: Yes

```
left  GAATGAAA---TGTACC-CAGAA-GTGACAC-GTGGCACTTCTAGGTAG-----AAGAATTTAAG
chrom GAATGAAA---TGTACC-CAGAA-GTGACAC-GTGGCACTTCTAGGTAG-----AAGATTTAAG
right GCACTCCAGCCTGGGCGACAGAGCGAGACTCCGTCTCAAAAAAAAAAAAAAAAAAAAAAAAAAAAAAAATTTAAG
      *1*1111*111*11*11****11*1***1*1**11**11111*111*11111111111**1*****
```

```
left  AGTAGG--CCGGGCGCGGTGGCTCACGCCTGTAATC-CCAGCACTTTGGGAGGCCGAGGCGGGCGGAT
chrom AGTAGGTGCATAATTTTCTTTTTCCCTCATAGATGCACCTGCACTATGG-----
right AGTAGGTGCATAATTTTCTTTTTCCCTCATAGATGCCCTGCACTATGG-----
      *****22*222222222*222**2*2*2*22*22*N**2*****2***22222222222222222222
```

Other Simple Repeat Low Complexity DNA LTR LINE SINE

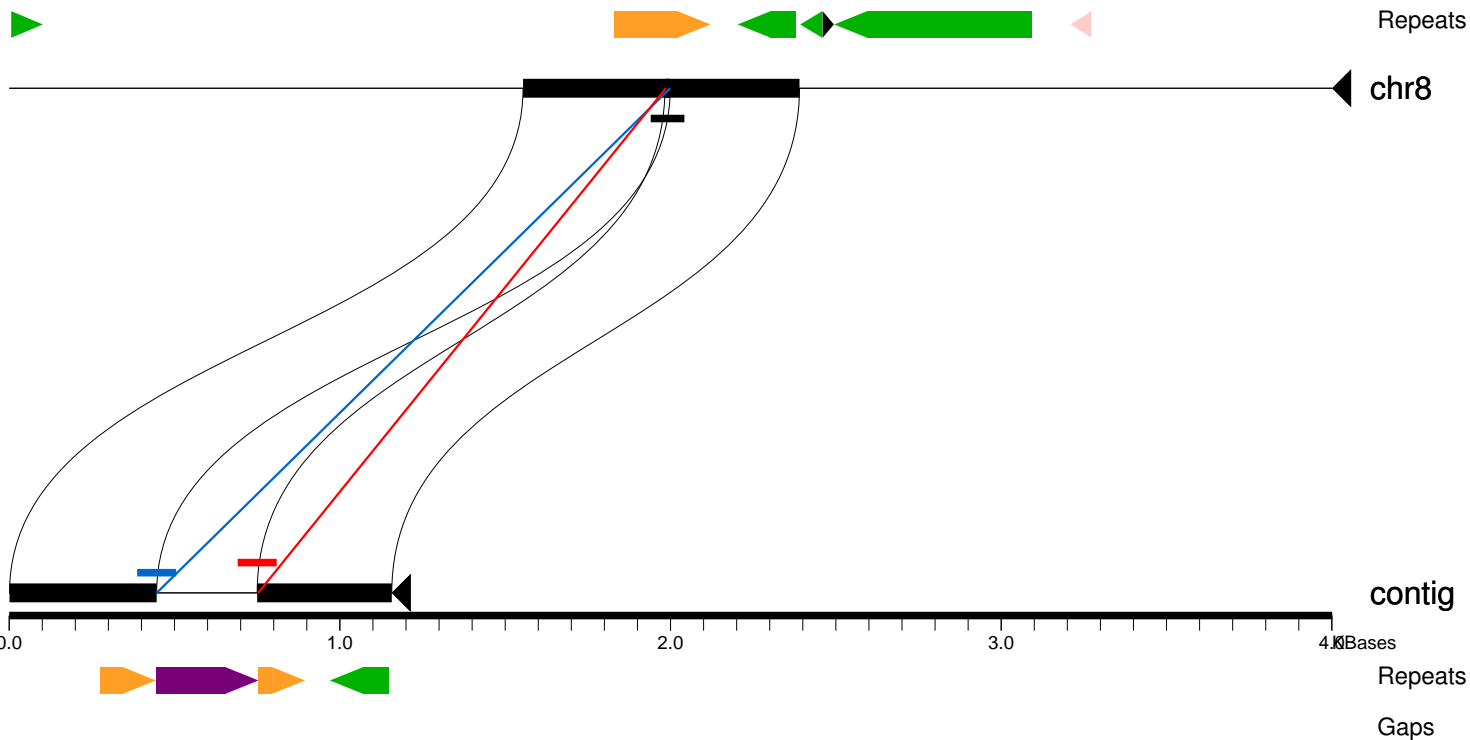

siteID: chr8\_76317951 Scafftig1 + Breakpoint: chr8:76317965

chr8:76317915-76318024

Overlap Length: 10 INS size: 235 Genotyped: No

```
left   TTT-CTTGCTCCTGGCACAGG-----AGGATT---GGCAGTGT--TACCTAAACTCTTCTCCGGGGTTTTT
chrom  TTT-CTTGCTCCTGGCACAGG-----AGGATT---GGCAGTGT--TACCTAAACTCTTCTCAGGGGGTTTTT
right  TCGGCTCACTGCAAGCTCCGCTTCCCAGGGTTCACGCCATTCTCCTGCCTCAGC-CTCCCGAGGGGGTTTTT
      *111**11**1*11**1*1*111111**1**111*1**1*1*11*1***1*1*1**1*112*****

left   TTTTTTTTTTTTTTTTTNNNNNNNNNNNNNNNNNNNNNNNNNNNNNNNNNNNNNNNNNNNNNNNNNNNNNN
chrom  AAAAAATT-----GAACAAATGCAATGTTTTTCTTAGATAATAACTAAGACTTCAC
right  AAAAAATT-----GAACAAATGCAATGTTTTTCTTAGATAATAACTAAGACTTCAC
      22222**22222222222222222222222222222222222222222222222222222222222222
```

Other Simple Repeat Low Complexity DNA LTR LINE SINE

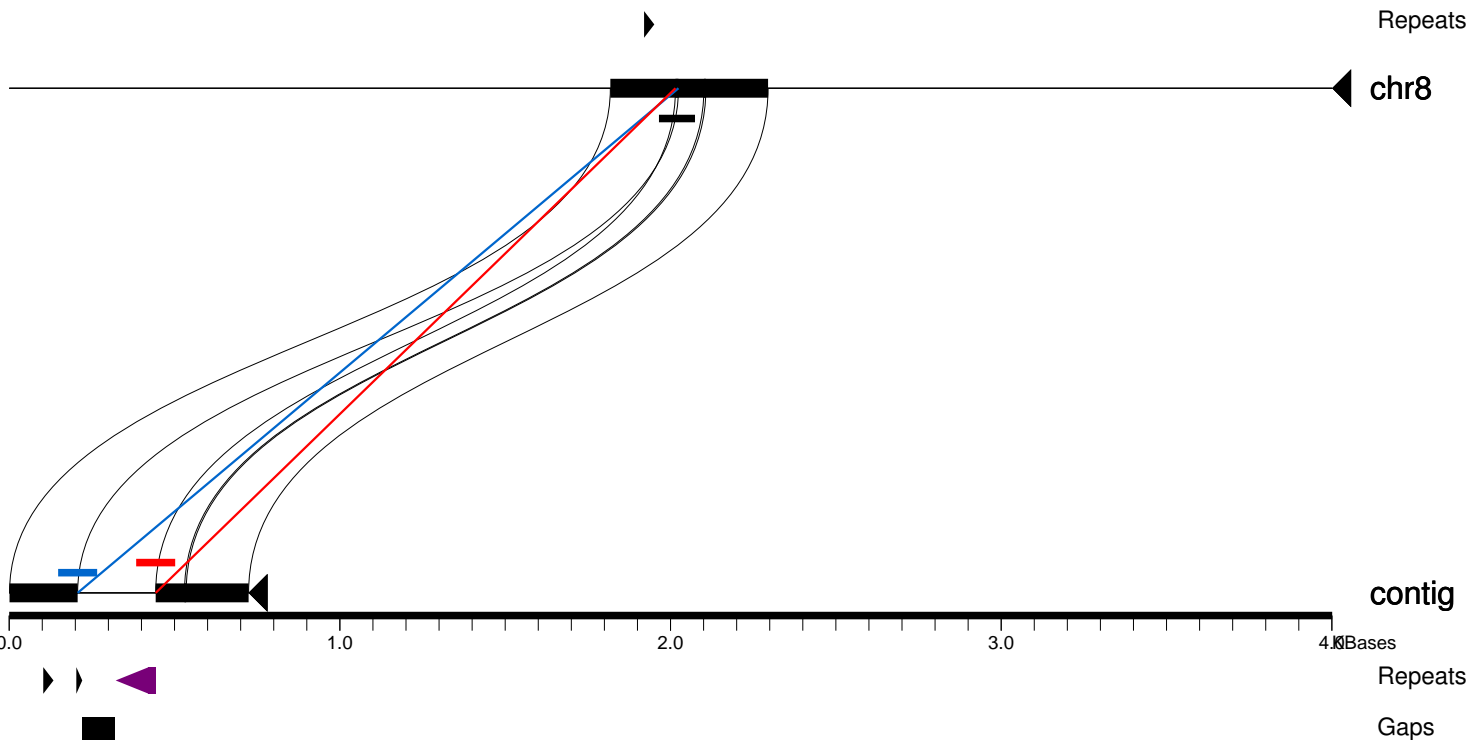

siteID: chr8\_77867092 Scaffitg3 + Breakpoint: chr8:77867080

chr8:77866920-77867251

Overlap Length: 12 INS size: 303 Genotyped: Yes

```
left      A-----TTCAGAAATGTGTTAAAAATAGAAATGATGTAATATGAAAAATATGAAACATCAGTT
chrom     AATCATCCATACATTTTCAGAAATGTGTTAAAAATAGAAATGATGTAATATGAAAAATATGAAACATCAGTT
right    A-----GAATGGCGTGAAACCCGGGA--GGCGGAGCTTGCAG----TGAGCCGAGATCC
*        11111***11*1**1**1111*1*11*11*1*111**1*11111***11*111*111
```

```
left      TGACAATT-AGTCCTTAAAAATTTTATAAACTAAAAATTAACACTGTATTTTTTATATTAATAAAAATTCACA
chrom     TGACAATT-AGTCCTTAAAAATTTTATAAACTAAAAATTAACACTGTATTTTTTATATTAATAAAAATTCACA
right    CGCCACTGCACTCC----AGCCTGGGCGAC--AGAGCGAGACTCCGTCTCAAAAAAAAAAAAAA----AAA
1*1**1*11*1***1111*111*11111**11*1*111*1***111*1*11*1*11**1***1111*1*
```

```
left      AACCCATTGCTTTTTGTAATTAAAAAAATTTTAGGCCGGGCGCGGTGGCTCACGCCTGTAATCCCA--GC
chrom     AACCCATTGCTTTTTGTAATTAAAAAAAATTTTAAAAAATAACAAAATGAAGTTTATTTTTTATTGCCATAGG
right    AA-----AAAAAAAAAATTTAAAAATAACAAAATGAAGTTTATTTTTTATTGCCATAGG
**1111111111111111**11*******1****2222222*2222**2222222222*2**2*2***22*2
```

```
left      ACTTTGGGAGGCCGA-----GCGGGCGGATCACGAGGTCAGG--AGA-----TCGAGAC
chrom     AGATTGACAAAATAAAAAATGATTAACTTTTGGCTTCCAGTCTACTTTTTCAATCTAGAAAATATTCTAGAA
right    AGATTGACAAAATAAAAAATGATTAACTTTTGGCTTCCAGTCTACTTTTTCAATCTAGAAAATATTCTAGAA
*22***22*22222*2222222222222222***222*2*222**2222***2222***22222*2***2
```

```
left      CATCCT--GGCTAA---CAAGGTGAAACCCCGT-----CTCTACTAAA
chrom     ATGACTTAGTCTTAGCCTCAGGGTAGAGCCCGGCTCATATGACCTCTTGAAAA
right    ATGACTTAGTCTTAGCCTCAGGGTAGAGCCCGGCTCATATGACCTCTTG----
2222*22*2**2*2222*2**22*2**2*2222222222***22N111
```

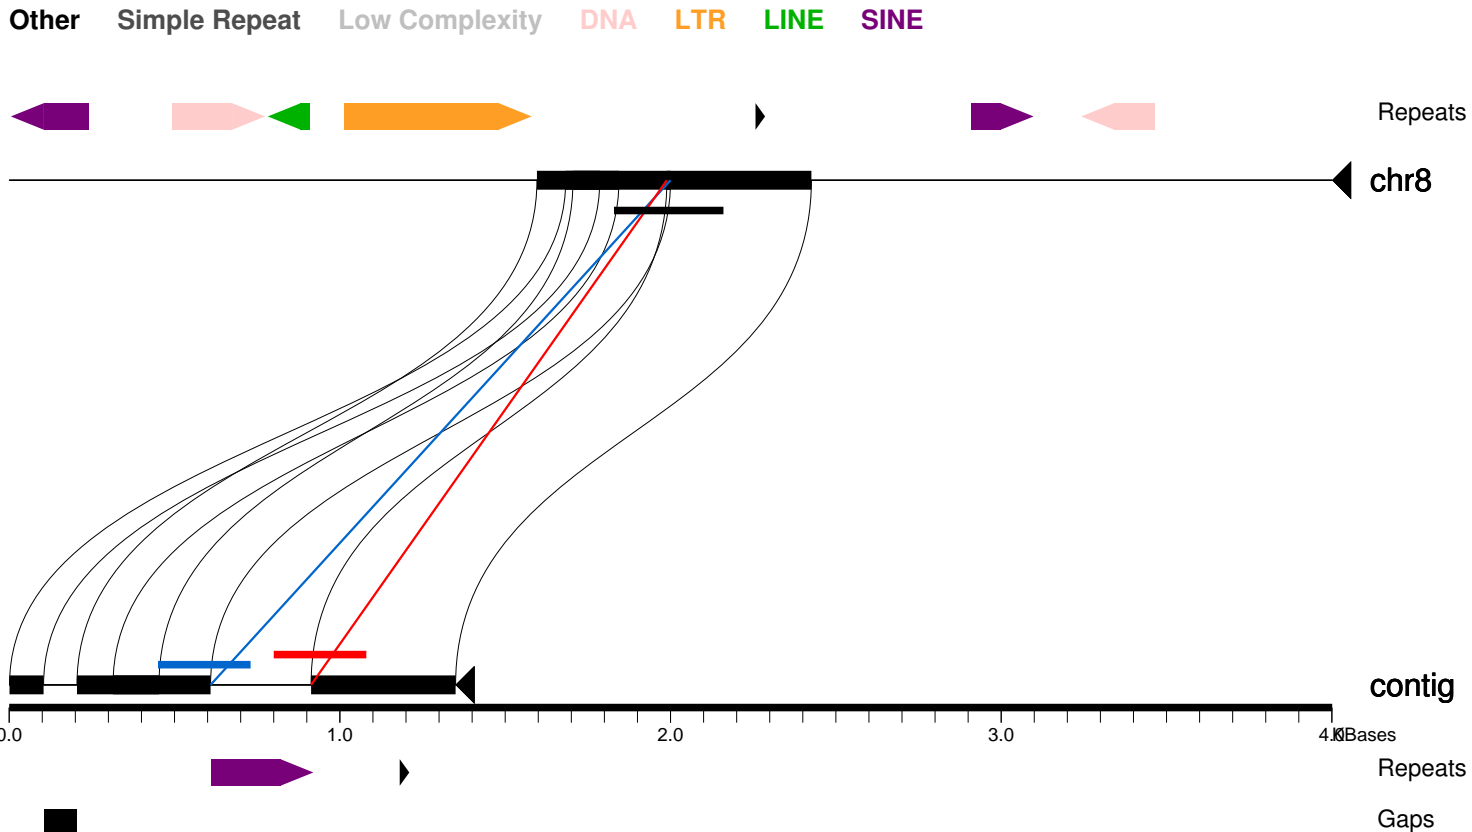



siteID: chr8\_81767572 Scafftig2 - Breakpoint: chr8:81767581  
 chr8:81767536-81767640  
 Overlap Length: 15 INS size: 301 Genotyped: Yes

```

left  ATCAATTTCTTTTCATTTAGAAATATTGTTA-TCCGGTTCTTGTCT-----AAAAAATCTT
chrom ATCAATTTCTTTTCATTTAGAAATATTGTTA-TCCGGTTCTTGTCT-----AATAAATCTT
right CTGCACTCCAGC-CTGGGCGACAGAGCGAGACTCCGTCTCAAAAAAAAAAAAAAAAAAAAAAATAAATCTT
      1*11*1*1*1111*11111**1*1*11*11*1****11**111111111111111111111******
left  TGCTTGGCCAGGCACGGTGGCTCACGCCTGTAATCCCAGCACTTTGGGAGGCCGAGGCGGGCGG
chrom TGCTTA---AGATATGGAA--TCAA-CCTAAATGCCCATCCATGAATGA-----CTGGATA
right TGCTTA---AGATATGGAA--TCAA-CCTAAATGCCCATCCATGAATGA-----CTGGATA
      ****2222**22*2**2222***22***22*22***2*22*2222**22222222*2**222
  
```

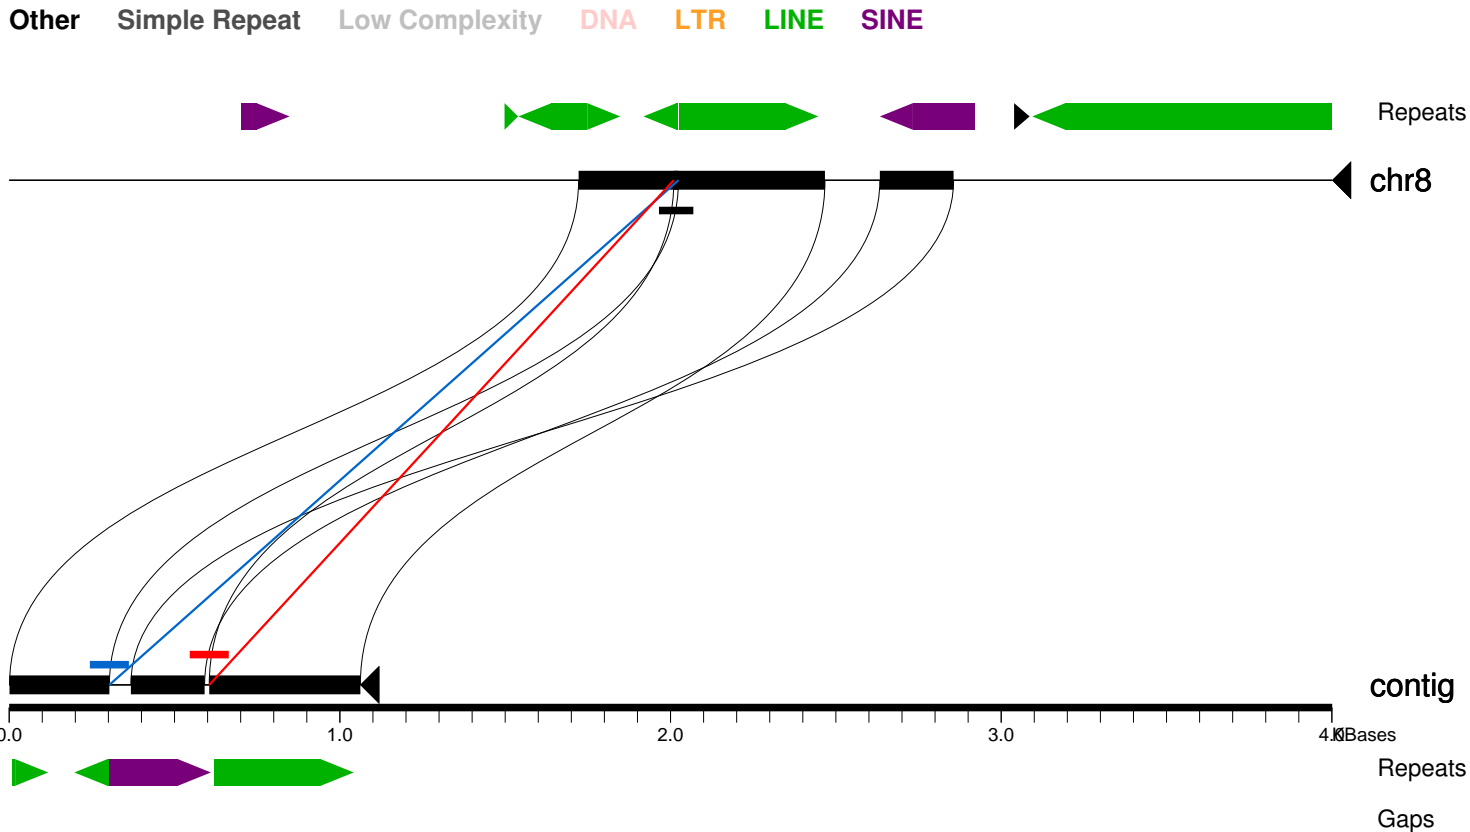

siteID: chr8\_82262941 Scafflig2 + Breakpoint: chr8:82262946  
 chr8:82262899-82263005  
 Overlap Length: 13 INS size: 390 Genotyped: No

```

left  TGCTCG-----TACATTAGATATGA-GAACTAAC-ATCAAACCA-----GCTTAAAAACATATTTATTT
chrom TGCTCG-----TACATTAGATATGA-GAACTAAC-ATCAAACCA-----GCTTAAAAACATATTTATTT
right TTTTAGCCGGGATGGTCTCGATCTCCTGACCTCGTGATCCGCCCGCCTCGGCCTCCCAA-ATATTTATTT
      *11*1*111111*1111*1***1*111*1**1111***111**111111**1*111**1*****
left  CTTTNNNNNNNNNNNNNNNNNNNNNNNNNNNNNNNNNNNNNNNNNNNNNNNNNNNNNNNNNNNNNNNNNNNN
chrom CTTATATTCTCAGCTTTTTCACAGCTTGGTGGGCAGGAACTAAAAATTATTT-----
right CTTATATTCTCAGCTTTTTCACAGCTTGGTGGGCAGGAACTAAAAATTATTT-----
      ***2*22222222222222222222222222222222222222222222222222222222222222222222
  
```

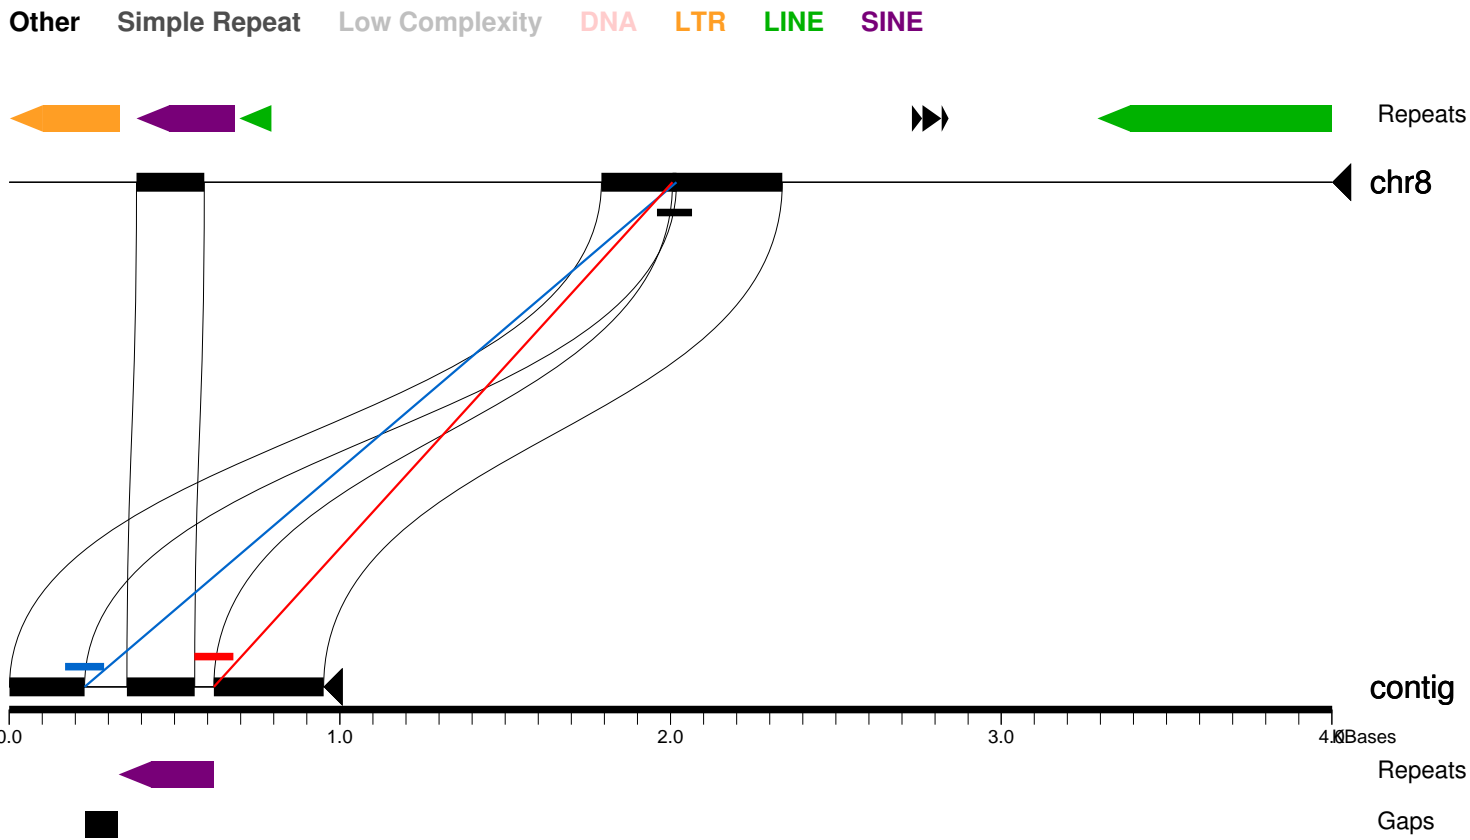







siteID: chr8\_83173547 Scaffitig1 - Breakpoint: chr8:83173532

chr8:83173481-83173591

Overlap Length: 9 INS size: 403 Genotyped: No

```

left AA---CATGTAAA---GTCCATCTAGGATTC AAGCATAAAATATGAAGGTTTGTGTAT---AAAAATTTTN
chrom AA---CATGTAAA---GTCCATCTAGGATTC AAGCATAAAATATGAAGGTTTGTGTAT---AAAAATTTTT
right AGGCGCCCGCCACCGCGCCCGCTAATTTTTT -GTATTTTTAGTAGAGACGGGGTTTCACA AAAAATTTTT
      *1111*11*11*1111*1**11***111**111*1**111**11*11*111*1**1*111*****2
    
```

```

left NNNNNNNNNNNNNNNNNNNNNNNNNNNNNNNNNNNNNNNNNNNNNNNNNNNNNNNNNNNNNNNNNNNNN
chrom AGCTTTATTGAATACTTACTATGTACGGGGTAGGCGTAAGTACTTTCATA-----
right AGCTTTACTGAATACTTACTATGTACGGGGTAGGCGTAAGTACTTTCATA-----
      2222222N22222222222222222222222222222222222222222222222222222222222222
    
```

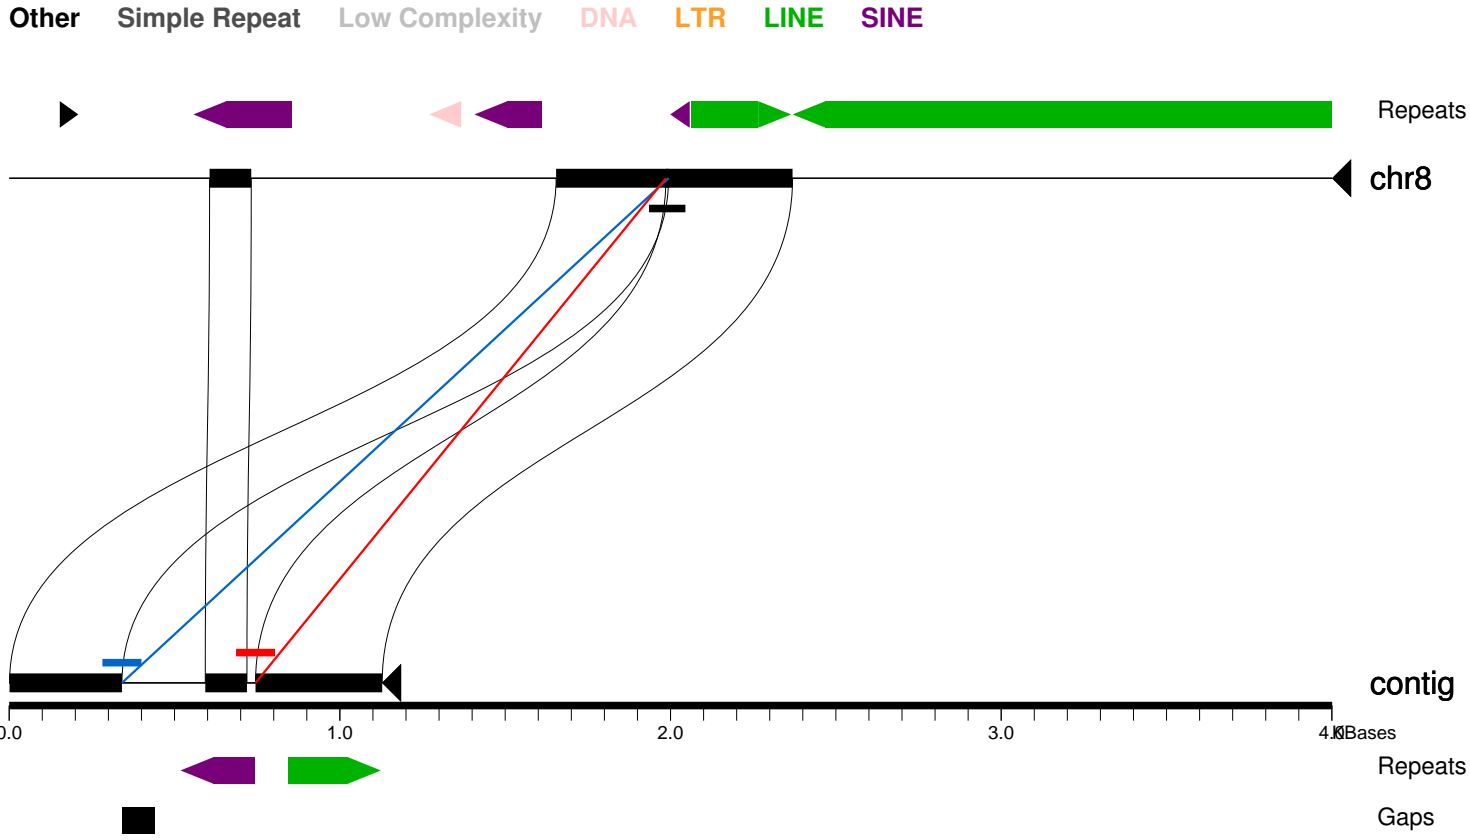

siteID: chr8\_83272926 Scaffitg2 - Breakpoint: chr8:83272971

chr8:83272811-83273144

Overlap Length: 14 INS size: 114 Genotyped: No

```
left NNNNNNNNNNNNNNNNNNNNNNNNNNNNNNNNNNNNNNNNNNNNNNNNNNNNNNNNNNNNNNNNNNNNNNNNNNNNNNNNNNNNNNNNNNNNNNNNN
chrom CTGAGAAATTAAATGTCCTTTCTTTGCACTGAAAAACAAATGCAGAACAGCTCATTTTCCTTTGCTGAGAG
right G---GCTCTTTTTTTTTTTTTTTTTTTTT-----TTTTTTTTTTTTTTTTTTGAGAC
NNNN2N2N2N2N2N2N2N2N2N2N2N2N2N2N2N2NNNNNNNNNNNNNNNNNNNNNNNNN2N2N2N2N2N2N2N2N2N
```

```
left NNNNNNNNNNNA-----AAGAATTATTTCTTAATATAGATGAAAAATATTTCCCAAAGCATTG
chrom GCAGAGCTAGAACATAGGTATGCAAAGAATTATTTCTTAATATAGATGAAAAATATTTCCCAAAGCATTG
right GGAGT-CTCGCTCT---GTC-GCCCAGGCTGG-----AGTGCAGTGGCGGGATCTCGGCTCACTGCA---
2N2N2N2N2N2N12N 22N 22N1**11*1111111*1*11**11*1111**1*111*1**11**111
```

```
left AAAATTC-CCTTTTLAGTCTAA---GCATAGTGGCTCTTTTTTTTTTTTTTTT-----TTTTT-----T
chrom AAAATTC-CCTTTTLAGTCTAA---GCATAGTGGCTCTTAAATAGAGACTTGCACAATCGTTAACACCAAT
right -AGCTCCGCCCTCCCAGGTTACACGCGCATAGTGGCTCTTAAATAGAGACTTGCACAATCGTTAACACCAAT
1*11*1*1**1111*11*1*111*****1*111**1111**1111**1**111**1111**1**111**111
```

```
left TTTTTT-----TTTGAGACGGAGTCTCG-----CTCTGTCGCCAGGCTGGAGTGCAGTGGCGG--
chrom TTATGTAACAGGCAATTTGAAAAGACTTTTAGAAATCCTGGGAAGTTACGACTACAACACATTTGTTCAT
right TTATGTAACAGGCAATTTGAAAAGACTTTTAGAAATCCTGGGAAGTTACGACTACAACACATTTGTTCAT
**2*2*222222222**2*2*222*2*2*22222**22*22*2222*2**22*222*2*2*22222
```

```
left --GATCTCGG-CTCACTGC---AAGC---TCCGCCTC-----CCGGTTCACGCGCATA
chrom TAGCTCTCAGTCTAATTACCACAAAGCCATTCACCCTCACCTTCCTGAATCAATG--TTC
right GAGCTCTCAGTCTAATTACCACAAAGCCATTCACCCTCACCTC-----
N2*2***2*2**2*2*2222***222*22***22222*1N1NN111NNN2N1N
```

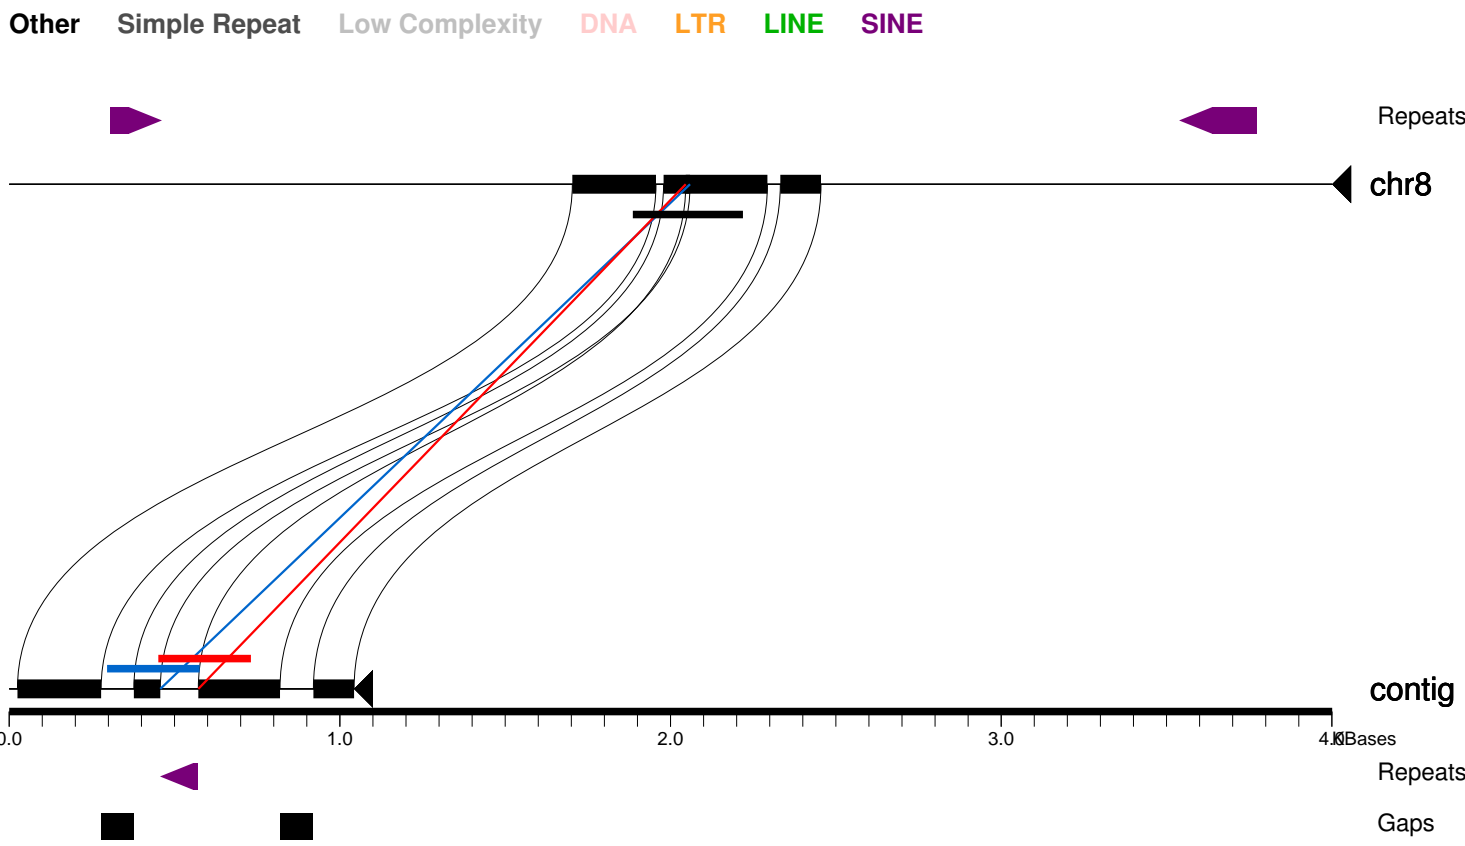

siteID: chr8\_83351482 Scaffitig5 - Breakpoint: chr8:83351463

chr8:83351419-83351522

Overlap Length: 16 INS size: 306 Genotyped: Yes

```

left   TCTACATTCTACGTTTATGAGAGCAACTATTGTAGCTCTCACAT-----AAGAGTAAAA
chrom  TCTACATTCTACGTTTATGAGAGCAACTATTGTAGTTCTCACAT-----AAGAGTAAAA
right  CCGCAGTCCGGCCTGGGCGACAG-AGCGAGACTCCGTCTCAAAAAAAAAAAAAAAAAAAAAAAAAAGAGTAAAA
      1*1111*1*11*1*1111**1**1*1*1*111*11N*****1*1111111111111111111******
  
```

```

left   AGGTGGCGCGGGCGCGGTGGCTCACGCCTGTAATCCCAGCACTTTGGGAGGCCGAGGCGGGTGGAT
chrom  AGGTGG-----GATTTTTTTTCTT-CCTGTG---CCTGGG--TTGTTTCACCT---CACATAATG
right  AGGTGG-----GATTTTTTTTCTT-CCTGTG---CCTGGG--TTGTTTCACCT---CACATAATG
      *****222222*222*222**222*****2222**2*2222***22222**2222*222*2222
  
```

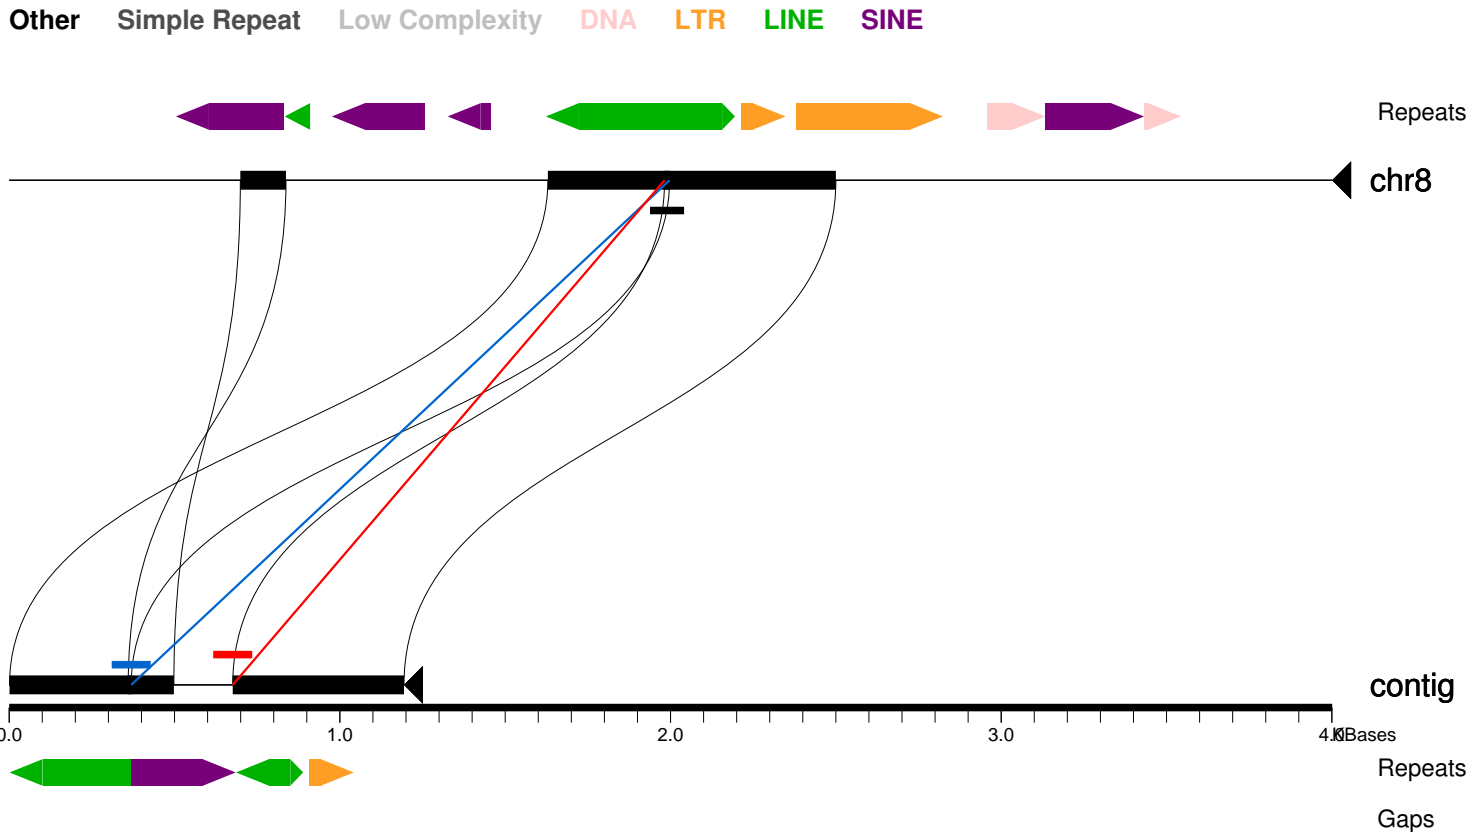

siteID: chr8\_85437281 Scaffold3 + Breakpoint: chr8:85437265

chr8:85437215-85437321

Overlap Length: 10 INS size: 297 Genotyped: Yes

```
left  GGCAAGATCCCTG-TTAGCCTTTCGGGGTAGAGCAATT-CA---TTAAAATA-----CGGCCTCAATT
chrom GGCAAGATCCCTG-TTAGCCTTTCGGGGTAGAGCAATT-CA---TTAAAATA-----CGGCCTCAATT
right GTGATCCGCCCCTCGGCCTCCCAAAGTGCTGGGATTACAGGCGTGAGCCACCGCGCCCGA CCTCAATT
      *11*1111***111*11****11*111*111*11***1**1111*1*111*1111111**1*****
```

```
left  TTTTTTTTTTTTTTTTTTTGAG-ACGGAGTCTCGCTCTGTGCGCCAGGCTGGAGTGCAGTGGC
chrom TTAAGTAAAGTAAAAATTAATAATACAGTGTCTTAATC-----ATACTAG---CCAGAT--
right TTAAGTAAAGTAAAAATTAATAATACAGTGTCTTAATC-----ATACTAG---CCAGAT--
      **222*222*2222**222*22**2*2****222**22222222*22**2*2222***2222
```

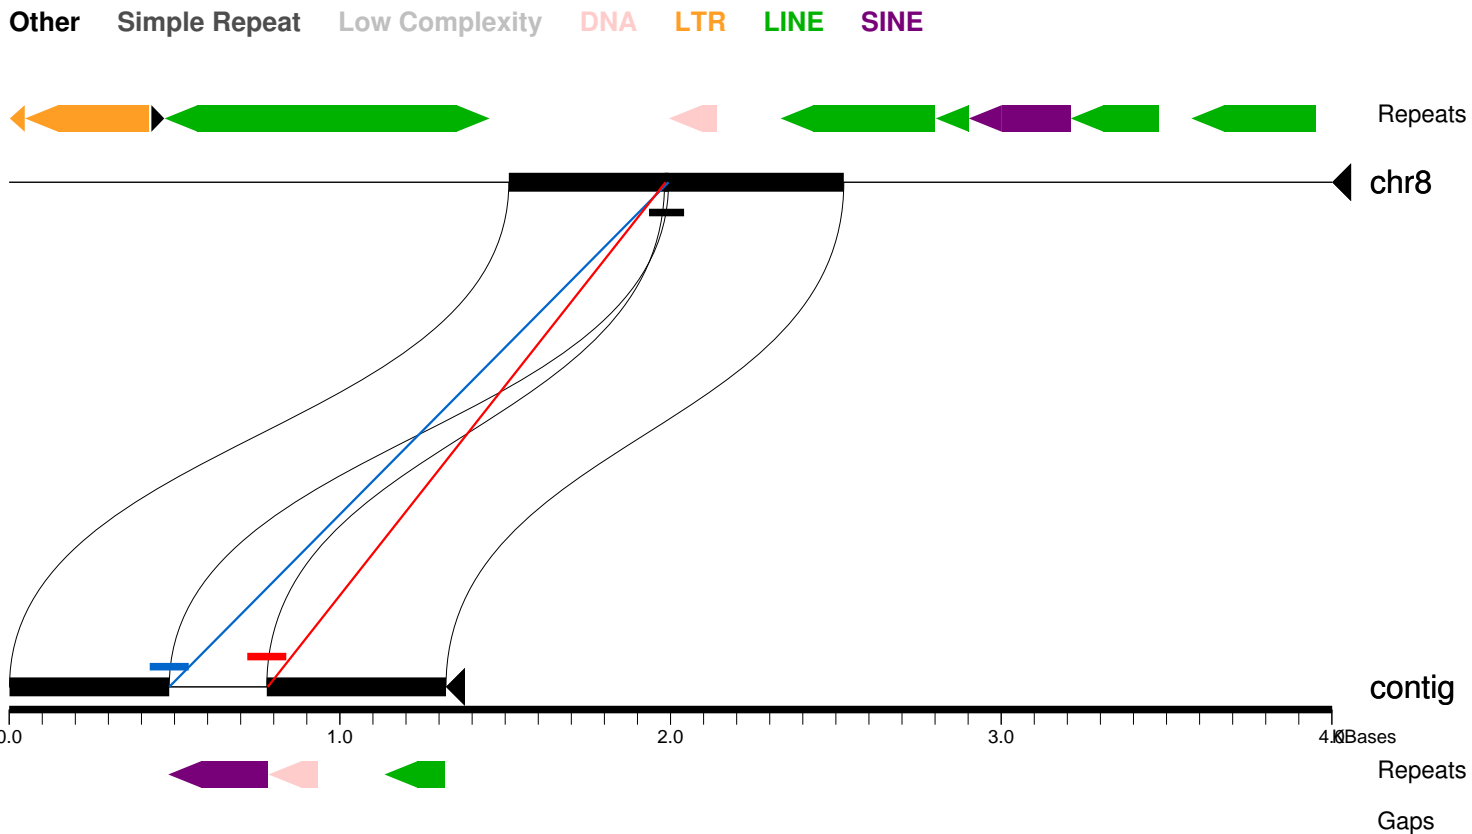

siteID: chr8\_87079625 Scaffitg1 - Breakpoint: chr8:87079621

chr8:87079578-87079666

Overlap Length: 17 INS size: 311 Genotyped: Yes

```
left  TTGT-----AAAGTGC---CT-----AGCACAGAGGAGTAGCAATAAAACACTG
chrom TTGT-----AAAGTGC---CT-----AGCACAGAGGAGTAGCAATAAAACACTG
right CAGTCCGGCCTGGGCGACAGAGCGAGACTCCGTCTCAAAAAAAAAAAAAAAAAAAAAAAAAAAAA
11**1111111111111111*1**1**1111**1111111111111111*11*1*1*11*11*11**1***1*111
```

```
left  AACAAAAGAATCATTCACTGGCTCACGCCTGTAATCCCAGCACTTTGGGAGGCCGAGGCGGGTGGATCAT
chrom AACAAAAGAATCATTCACTGAAT---ACATATTATTC-----TGAATCAT
right AAAAAAAGAATCATTCACTGAAT---ACATATTATTC-----TGAATCAT
**1*****22*2222*2*2*2**2*2222222222222222222222222222**2*****
```

```
left  GAGGTCAGG
chrom CATATA---
right CATATA---
2*22*2222
```

Other Simple Repeat Low Complexity DNA LTR LINE SINE

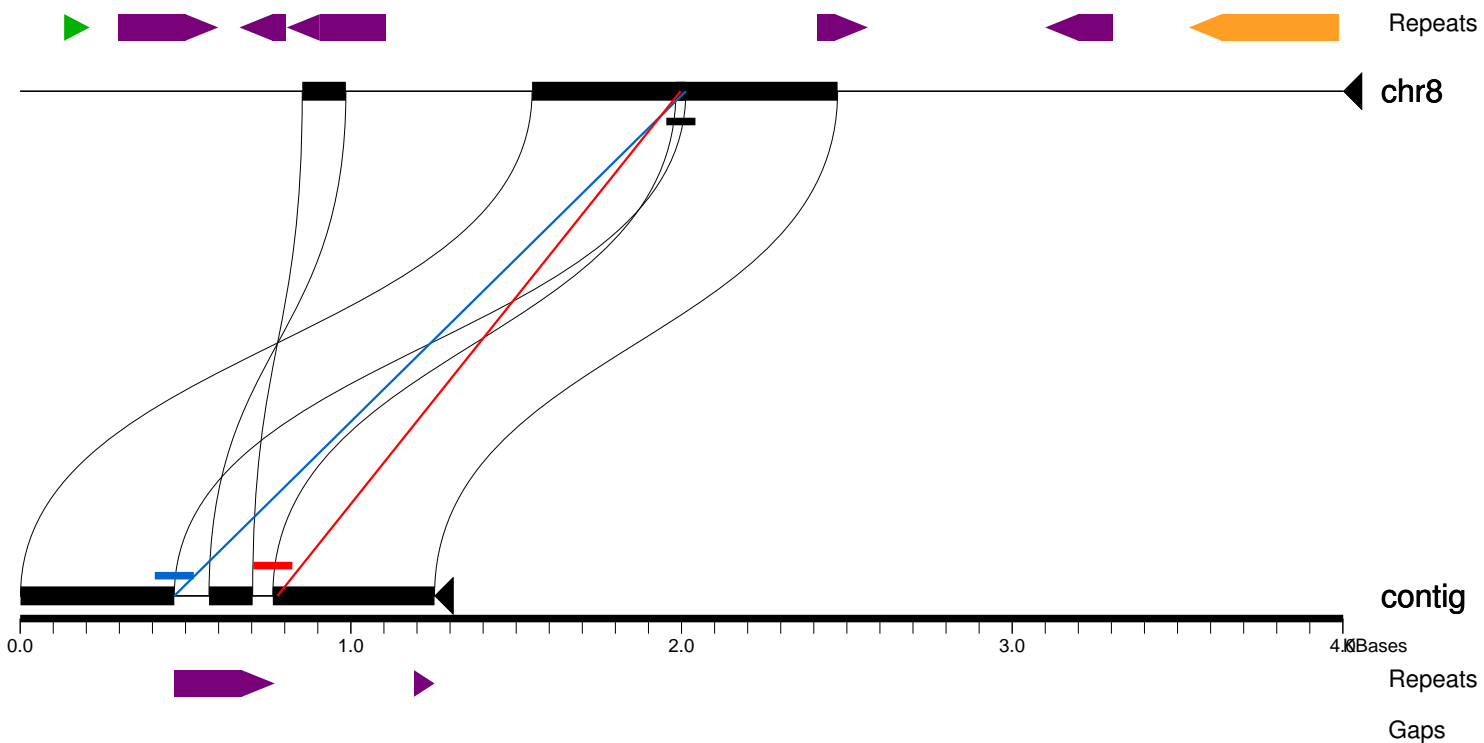

siteID: chr8\_88410428 Scafftig3 + Breakpoint: chr8:88410425

chr8:88410406-88410484

Overlap Length: 18 INS size: 266 Genotyped: Yes

```
left  -----ATGTTAT--AT-----TAAT-----AGATTGAAATATTTTC
chrom -----ATGTTAT--AT-----TAAT-----AGATTGAAATATTTTC
right AGCCGGGATGGTCTCGATCTCCTGACCTCGTGATCCGCCCGCCTCGGCCTCCCAAAGTGAAATATTTTC
      1111111***1*1*11**1111111111111*1**1111111111111111111*1*1*1*****
```

```
left  TTTTTTTTTTTTTTTTTTTTTTTTTTTGAGACGGAGTCTCGCTCTGTCGCCAGGCTGGAGTGCAGTGGCG
chrom TTATTTTCTTATAAAATCTATTTTCTGGAGA-----TATC---TAAGC-----
right TTATTTTCTTATAAAATCTATTTTCTGGAGA-----TATC---TAAGC-----
      **2***2**2*222*2*2***2*2***222222222222*2**2222*2**22222222222222
```

```
left  GGATCTCGGCTCACTGCAA
chrom --AT-----TCA-TGTAT
right --AT-----TCA-TGTAT
      22**222222***2**2*2
```

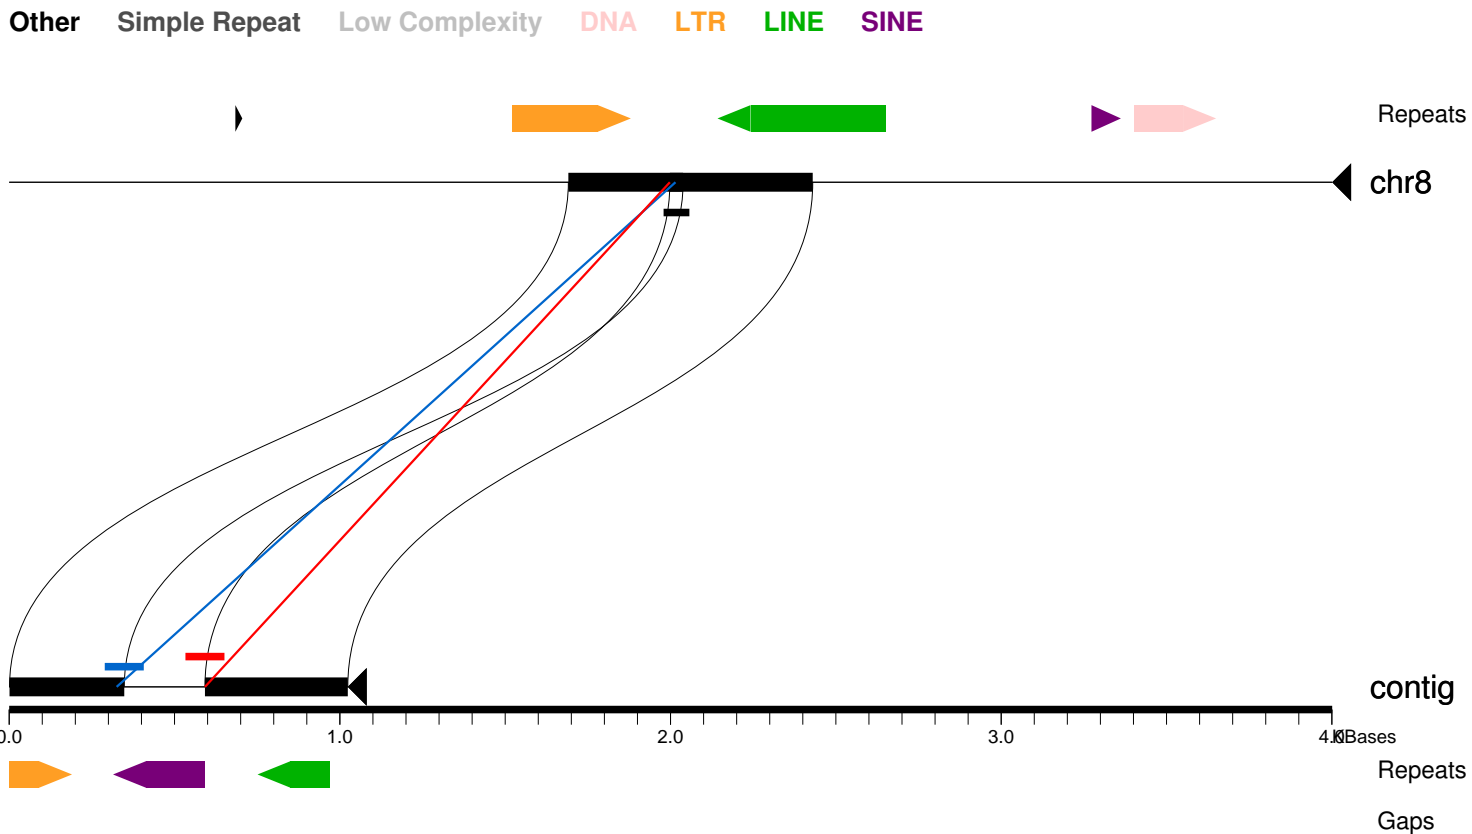

siteID: chr8\_88756994 Scaffitig1 - Breakpoint: chr8:88757009

chr8:88756954-88757068

Overlap Length: 5 INS size: 488 Genotyped: No

```

left    CTGTCAAAACTATGCTAGGTCTAGTTCGTAGACATATGATTGGTTTAAAAAATTGT----ATTGGCCGGG
chrom   CTGTCAAAACTATGCTAGGTCTAGTTCGTAGACATATGATTGGTTTAAAAAATTGT----ATTGGCAATTT
right   NNNNNNNNNNNNNNNNNNNNNNNNNNNNNNNNNNNNNNNNNNNNNNNNNNNNNNNNNNNNNNNNNNNNNNNNN
111111111111111111111111111111111111111111111111111111111111111111111111
111111111111111111111111111111111111111111111111111111111111111111111111

```

```

left    CGCGGTGGCTCACGCCTGTAATCCAGCACTTTGGGA---GGCCGAGGCGGGCGGA-
chrom   -----TGTTTTAAATACT---ATTCCATTCTTTCAGAAATCAGACATAATTGTTAAGTT
right   -----TGTTTTAAATACT---ATTCCATTCTTTCAGAAATCAGACATAATTGTTAAGTT
22222**22*2*222**222**2***222***22*2*222*2*22*222*222*222*22

```

Other    Simple Repeat    Low Complexity    DNA    LTR    LINE    SINE

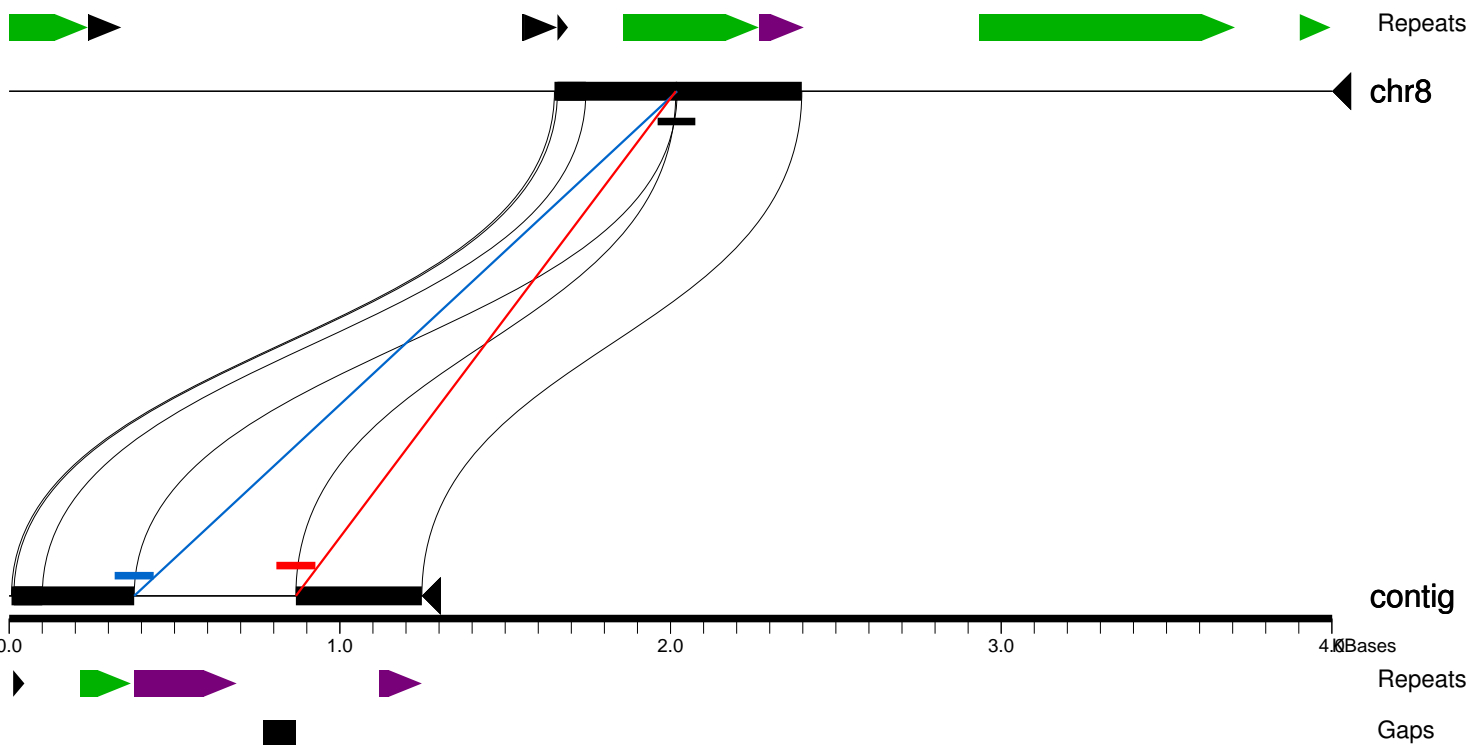

siteID: chr8\_8920098 Scaffitg8 - Breakpoint: chr8:8920115

chr8:8919955-8920287

Overlap Length: 13 INS size: 308 Genotyped: Yes

```
left AAA-----GAATGTTTTCTAAGTTGGCACCAGAGTTGGGGAGTTTTAAGAGGTTTAGAAGCC
chrom AAAAGAGTGCAAAAAAGAATGTTTTCTAAGTTGGCACCAGAGTTGGGGAGTTTTAAGAGGTTTAGAAGCC
right AATGGCGTGAACCCGGGAAG-----CGGAGCTTGCA-----GTGAGCC----GAGATTGCGCCACT
**1N2N222N2NNNNN***111111*11**1*1***111111111*1***111111***1**11*111*1
```

```
left TGGCTGTCAATACTTACAACAGTTATGGAGGCA-AGGGAAACAGGCCCTTGAAAAAGAAGGTAATGTGGAG
chrom TGGCTGTCAATACTTACAACAGTTATGGAGGCA-AGGGAAACAGGCCCTTGAAAAAGAAGGTAATGTGGAG
right --GCAGTCCGCAGTCCGACCTG----GGCGACAGAGCGAGACTCCGTCTCAAAAAAAAAAAAAA-----
11**1***111*1*111*1*1*1111**1*1**1**1**1**1*11111**11***1**111**1111111
```

```
left TGGGTAGCCTCCGTATTGATTAAGAAGGGGACGGGG----CCGGGCGTG-GTGGCTCACGC-----CT
chrom TGGGTAGCCTTCGTATTGATTAGAAGGGGACGGGACTTAACTCCACTGTGAGAGTTAATCAGAGTATCT
right -----AAAAAAAAGAAGGGGACGGGACTTAACTCCACTGTGAGAGTTAATCAGAGTATCT
1111111111N111*111*11*****222222*222222*2*2*22*2*22*222222**
```

```
left GTAATCCAGCACTTTGGGAGGCCGAGGC-----GGTGATCA-----TGAGGTCAGGAGAT
chrom GTGAT---GGTCCTGTAGGCTTCCGAGGCAATCCGGCAGTGTGAGTCTACAGCCGCTAAGCTGAGAAGAT
right GTGAT---GGTCCTGTAGGCTTCCGAGGCAATCCGGCAGTGTGAGTCTACAGCCGCTAAGCTGAGAAGAT
**2**2222*22**2*2**22*****22222*22*22***22222222222*2**2*2**2****
```

```
left C-----GAGACCATCTGGCTAACAAGGTGAAACCC-----GTCTCTACTAAA--
chrom CTGGGAAGGAGTCAGTCAGAGAGCCTTGGGCCAGAGTTCCAGGGGCTCTGGGAGTGG
right CTGGGAAGGAGTCAGTCAGAGAGCCTTGGGCCAGAGTTGCAGGGGCTCT-----
*2222222***2*22**22*2222222**22*2*22212222*2***NNN1NN
```

Other Simple Repeat Low Complexity DNA LTR LINE SINE

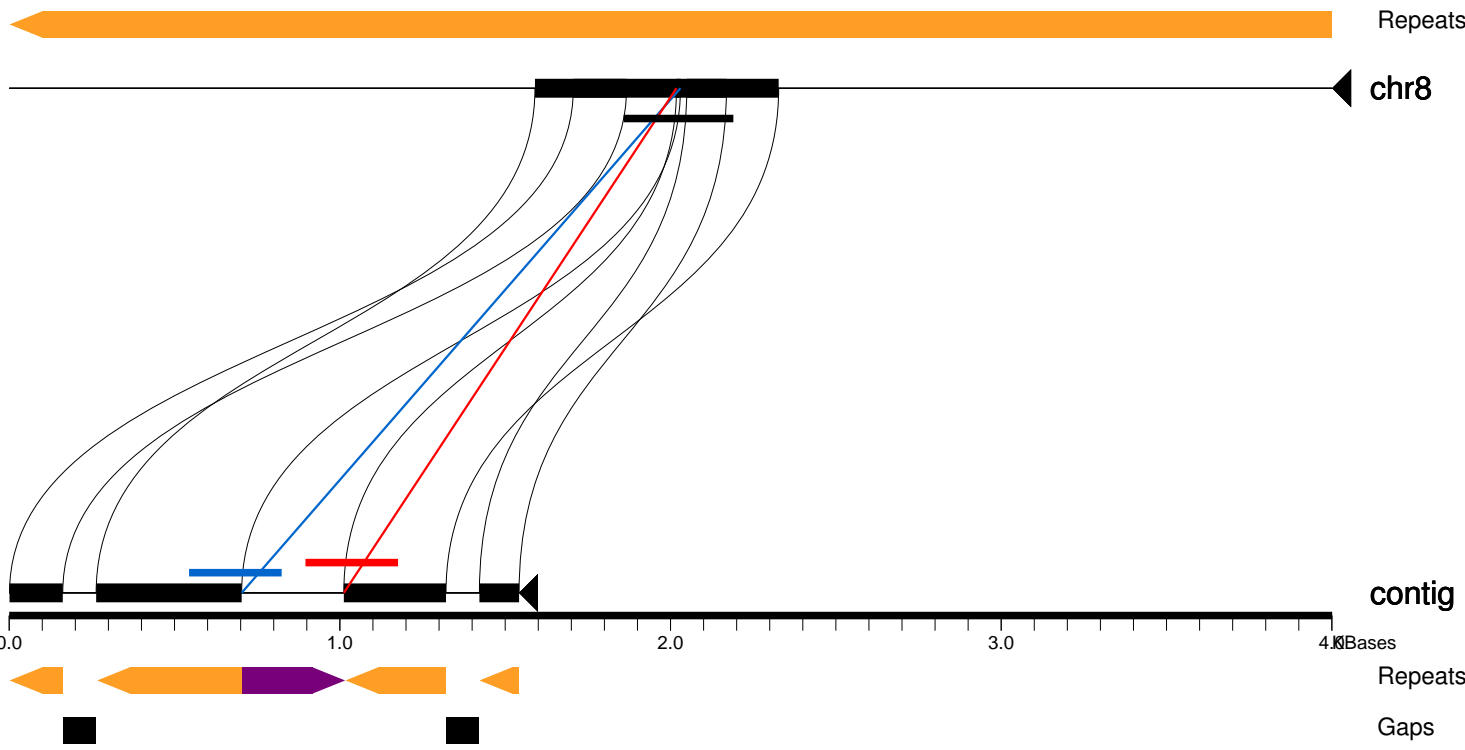



siteID: chr8\_9012978 Scaffitig1 - Breakpoint: chr8:9012956  
 chr8:9012907-9013014  
 Overlap Length: 11 INS size: 428 Genotyped: No

```

left      -----TAAACAGTGTTCCTTTATACATGTGTTTACATCAGCTTCTGCTCATCCAGACA
chrom     -----TAAACAGTGTTCCTTTATACATGTGTTTACATCAGCTTCTGCTCATCCAGAAA
right    CCGCCCGCCTCGGCCTCCCAAAGTGCTGGGAT-TACAGGCGTGAGCCACCGCGCCCGGCC---CAGAAA
          11111111111111111111*111*1****1*1111*1****1*1**111*11*1**111*1**1*111****2*

left      CTTTNNNNNNNNNNNNNNNNNNNNNNNNNNNNNNNNNNNNNNNNNNNNNNNNNNNNNNNNNNNNNNNN
chrom     CTTT-----AAAAAGGATTGCAAATGTTTTACCTCCTTCTCAACTTAATGCATTTCA
right    CTTT-----AAAAAGGATTGCAAATGTTTTACCTCCTTCTCAACTTAATGCATTTCA
          ***222222222222222222222222222222222222222222222222222222222222222222222222
  
```

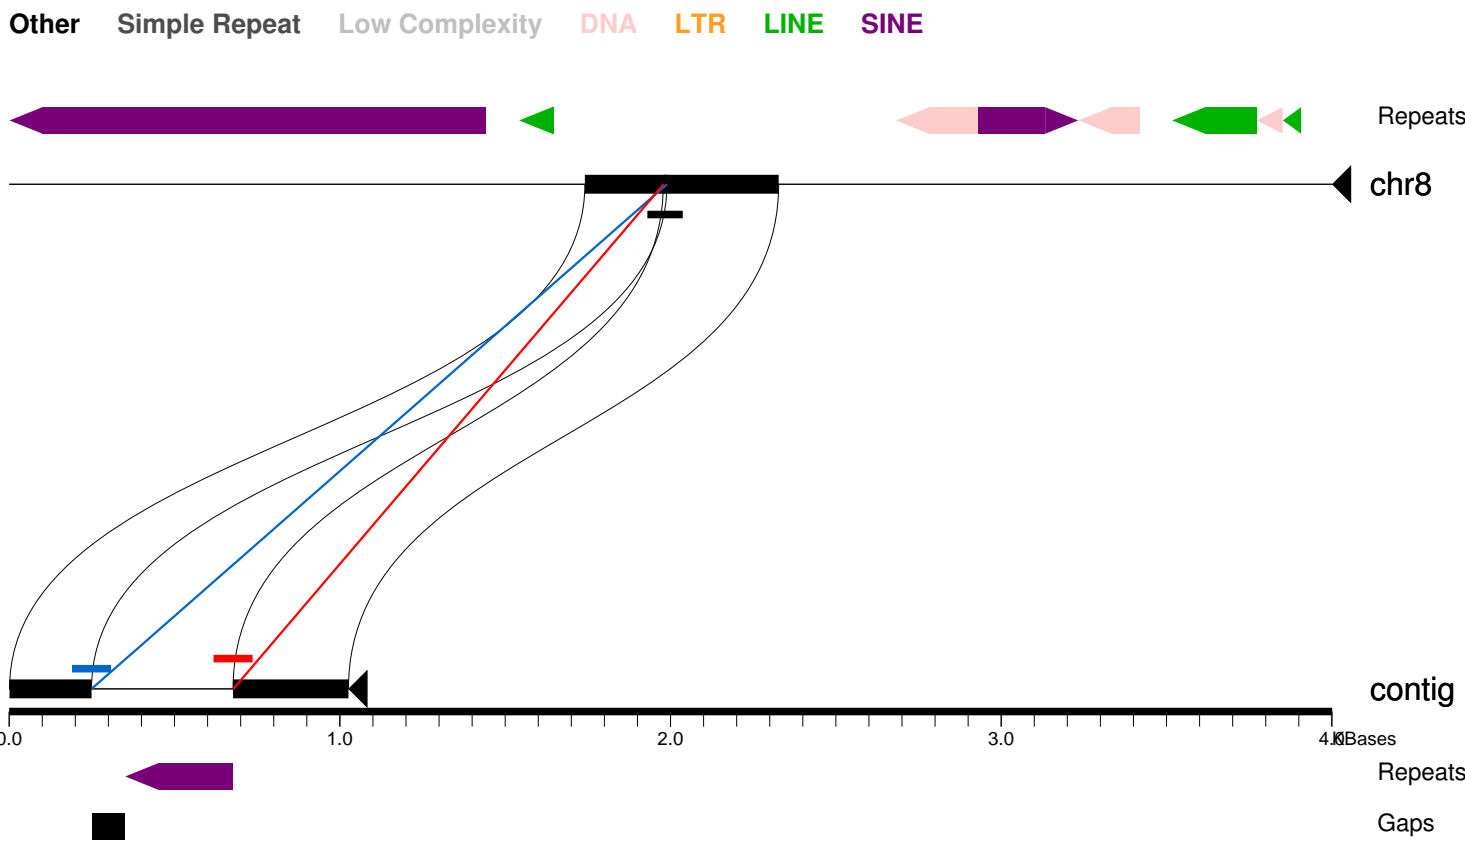



siteID: chr8\_94162476 Scaffold6 - Breakpoint: chr8:94162472

chr8:94162429-94162531

Overlap Length: 17 INS size: 299 Genotyped: Yes

```
left  --CATATATGTAGGT-----ATGTTTCTGGACTCTCTATTCTGATATATT-----GGTTTATTTAT
chrom --CATATATGTAGGT-----ATGTTTCTGGACTCTCTATTCTGATATATT-----GGTTTATTTAT
right TCCGCCCGTCTCGGCCTCCCAAAGTGCTGGGATTACAGGCGTGAGCCACCGCGCCCGGC GGTTTATTTAT
      11*111111*1*1**111111*111*1****11*11*111111***111*111111111111*****
```

```
left  TTTTC TTTTTTTTTTTTTTTTTTTTTTTTGGAGGCGGAGTTTGTCTCTGTCGCCAGGCTGGAGTGCAG
chrom TTTTC TGTACCAATATCTCACTGTT-----GTAATTAT----TGTAGC-----TTTATAACCA
right TTTTC TGTACCAATATCTCACTGTT-----GTAATTAT----TGTAGC-----TTTATAACCA
      *****2*22222*2*2*222*2**222222*2*2**2*2222***2**222222*22*222*22
```

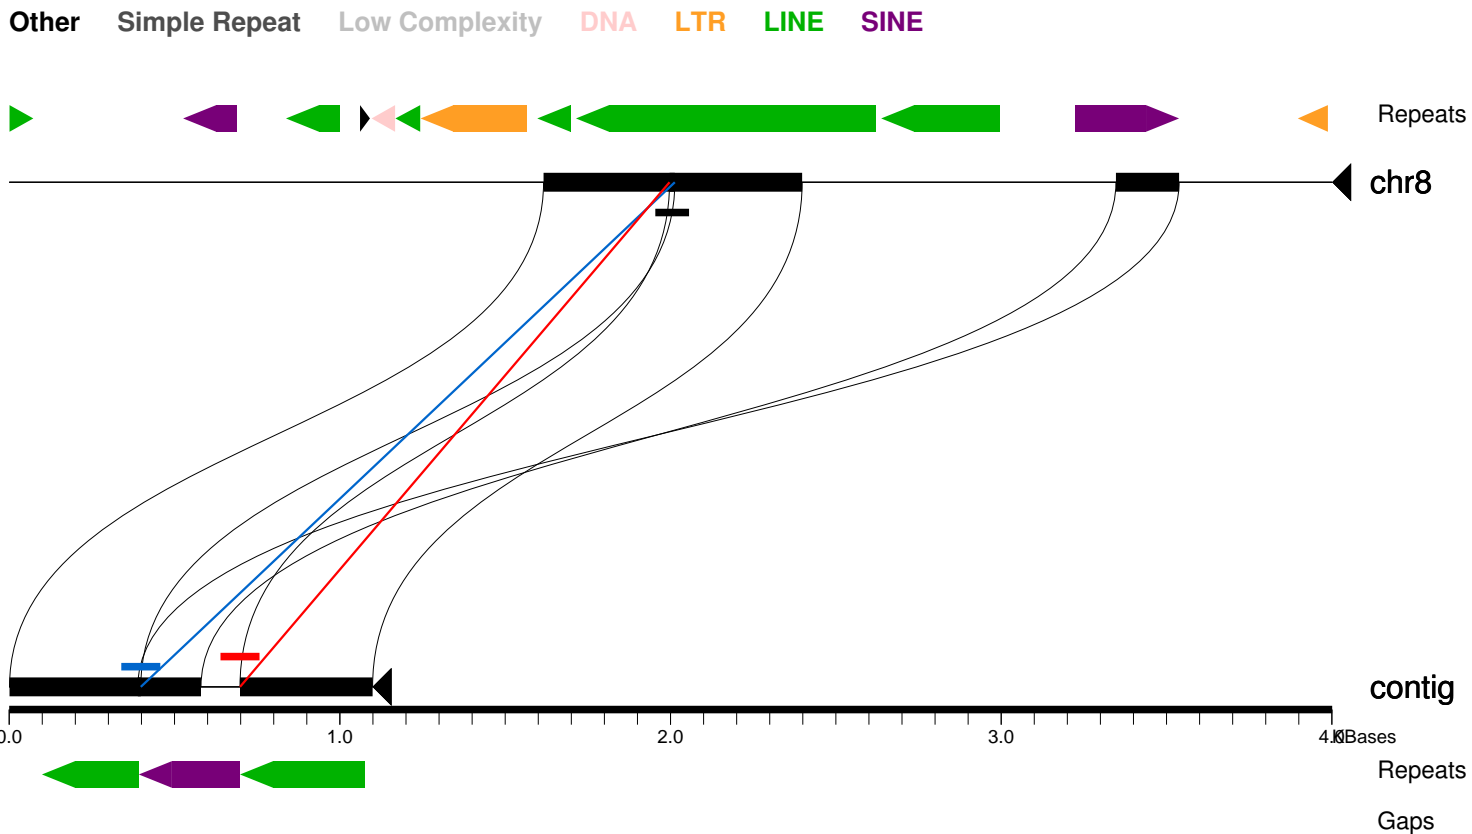

siteID: chr8\_9463657 Scaffitg7 - Breakpoint: chr8:9463650

chr8:9463620-9463717

Overlap Length: 12 INS size: 300 Genotyped: Yes

```
left   TTGAGTT--AATGTGTTTGTGT----GGTGTG-----CGGT-AAGAGTTATTTT-----TTTT
chrom  TTGAGTT--AATGTGTTTGTGT----GGTGTG-----CGGT-AAGAGTTATTTTGTG--TTTT
right  CGGCCTCCCAAAGTGCTGGGATTACAGGCGTGAGCCACCGCGCCCGGCCAAGAGTTATTTTGTGTGTTTT
      11*11*111**1***1*1*11*1111**1***111111111111***11*****22211****
```

```
left   TATTTTTATTTTTTTGAGACGGAGTCTCGCTCTGTCGCCAGGCTGGAGTGCAGTGGCGGGATCTCGGCTC
chrom  TTTTTTTTCTTTTCTATATAGAGAATCCGT-TGT-----TTCAG---CATGATTTG-----
right  TTTTTTTTCTTTTCTATATAGAGAATCCGT-TGT-----TTCAG---CATGATTTG-----
      *2*****22*****22*2*22***22**22*2***22222222222222*2***222*22***2*222222
```

```
left   ATT
chrom  -TT
right  -TT
      2**
```

Other Simple Repeat Low Complexity DNA LTR LINE SINE

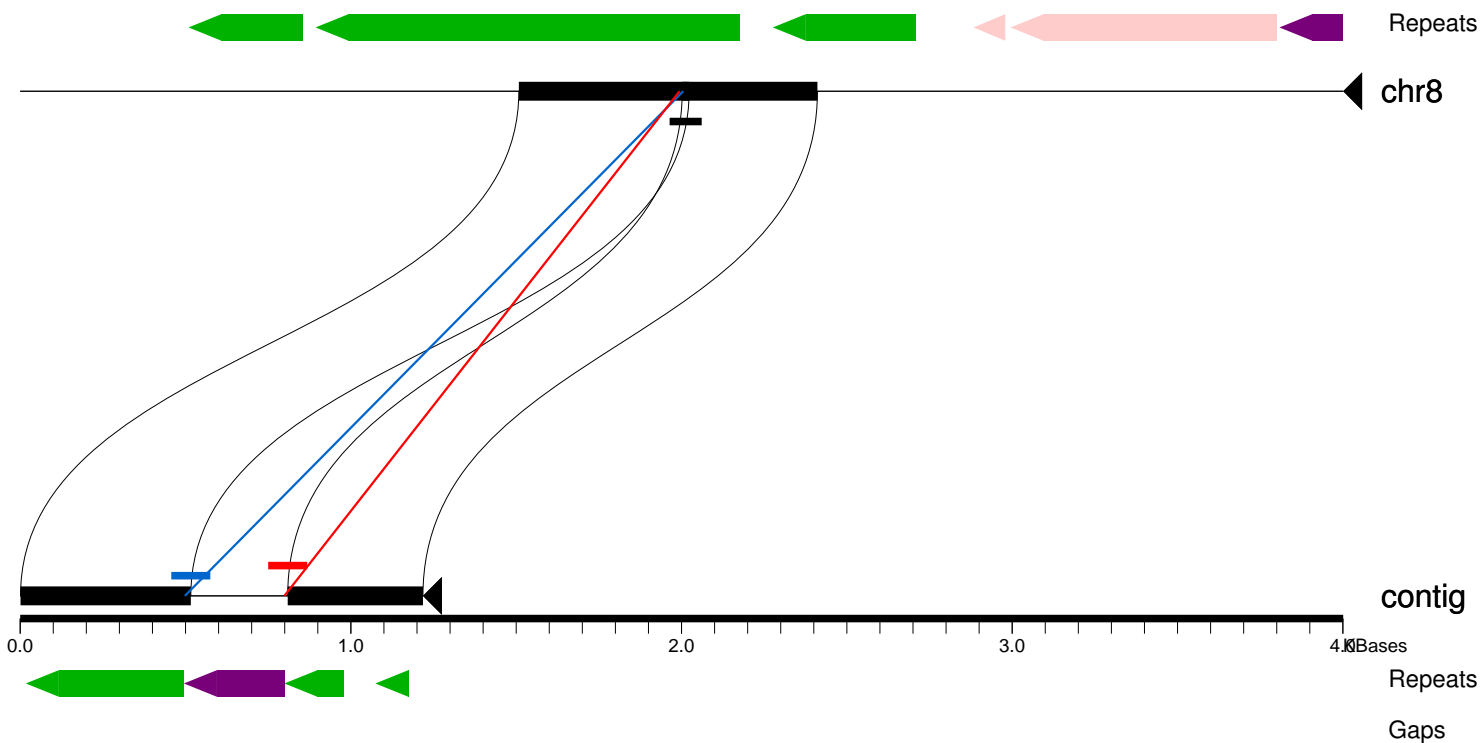



siteID: chr8\_96467775 Scaffitig1 - Breakpoint: chr8:96467779

chr8:96467735-96467838

Overlap Length: 9 INS size: 307 Genotyped: Yes

```
left CCTT---TCTCTGGTT-----TGCTGGGACCTC-----TTAGATGGACTGTTAGTTTTCCCTGTC CCC
chrom CCTT---TCTCTGGTT-----TGCTGGGACCTC-----TTAGATGGACTGTTAGTTTTCCCTGTC CAC
right CCGCCCGCCTCGGCCTCCCAAAGTGCTGGGATTACAGGCGTGAGCCACCGTGCCCGGCC*CCCTGTCCAC
**111111***1*11*1111111*****111*11111*1**111111**111*111*****2*
```

```
left TTTTTTTTTTTTTTTTTTTTTTTTTTTTTTTGAGACGGAGTCTCGCTCTGTCGCCAGGCTGGAGTGCAGT
chrom TCTTTAA-----GACTCAAGTCTGGTTGTTGAAGTGTCCCTTAATGATGG---GAATC
right TCTTTAA-----GACTCAAGTCTGGTTGTTGAAGTGTCCCTTAATGATGG---GAATC
*2***222222222222222222*22**2*2*22*2*2*22*****2222*2*2***222*2*22
```

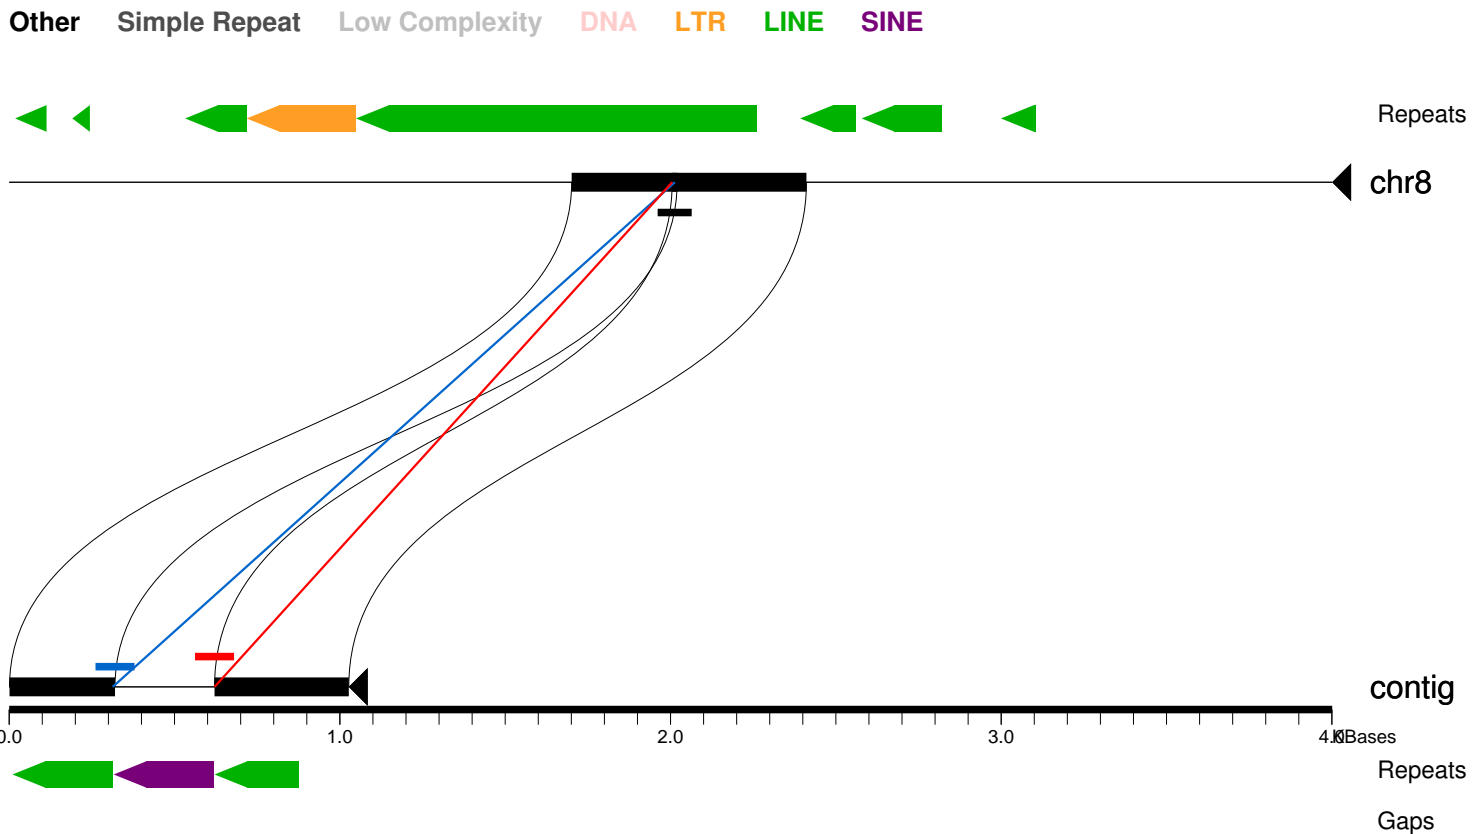

siteID: chr8\_9665640 Scafftig2 - Breakpoint: chr8:9665657

chr8:9665614-9665716

Overlap Length: 17 INS size: 493 Genotyped: No

```
left      TTTTACCTCAAACCACCACCCTTAGGTCTCTCTTGAAGTGG-----ATAGAAGATCTTC
chrom     TTTTACCTCAAACCACCACCCTTAGGTCTCTCTTGAAGTGG-----ATAGAAGATCTTC
right     NNNNNNNNNNNNNNNNNNNNNNNNNNNNNNNNNNNNNNNNNNNNNNNNNNNNNNNNNNNAAAAAGAAGATCTTC
          11111111111111111111111111111111111111111111111111111111111111111111*1*****
```

```
left      ACTGGCGGCCGGCGCGGTGGCTCACGCCTGTAATCCACGACTTTGGGAGGCCGAGGCGGGTGG
chrom     ACTGGCAATCT-----TCAC--CAATACTCCAAAAAGTGT---ACTCCAATACTTTCAC
right     ACTGGCAATCT-----TCAC--CAATACTCCAAAAAGTGT---ACTCCAATACTTTCAC
          *****222*222222222222*****22*22**2***2*22*2*2*222*22**2*22*222222
```

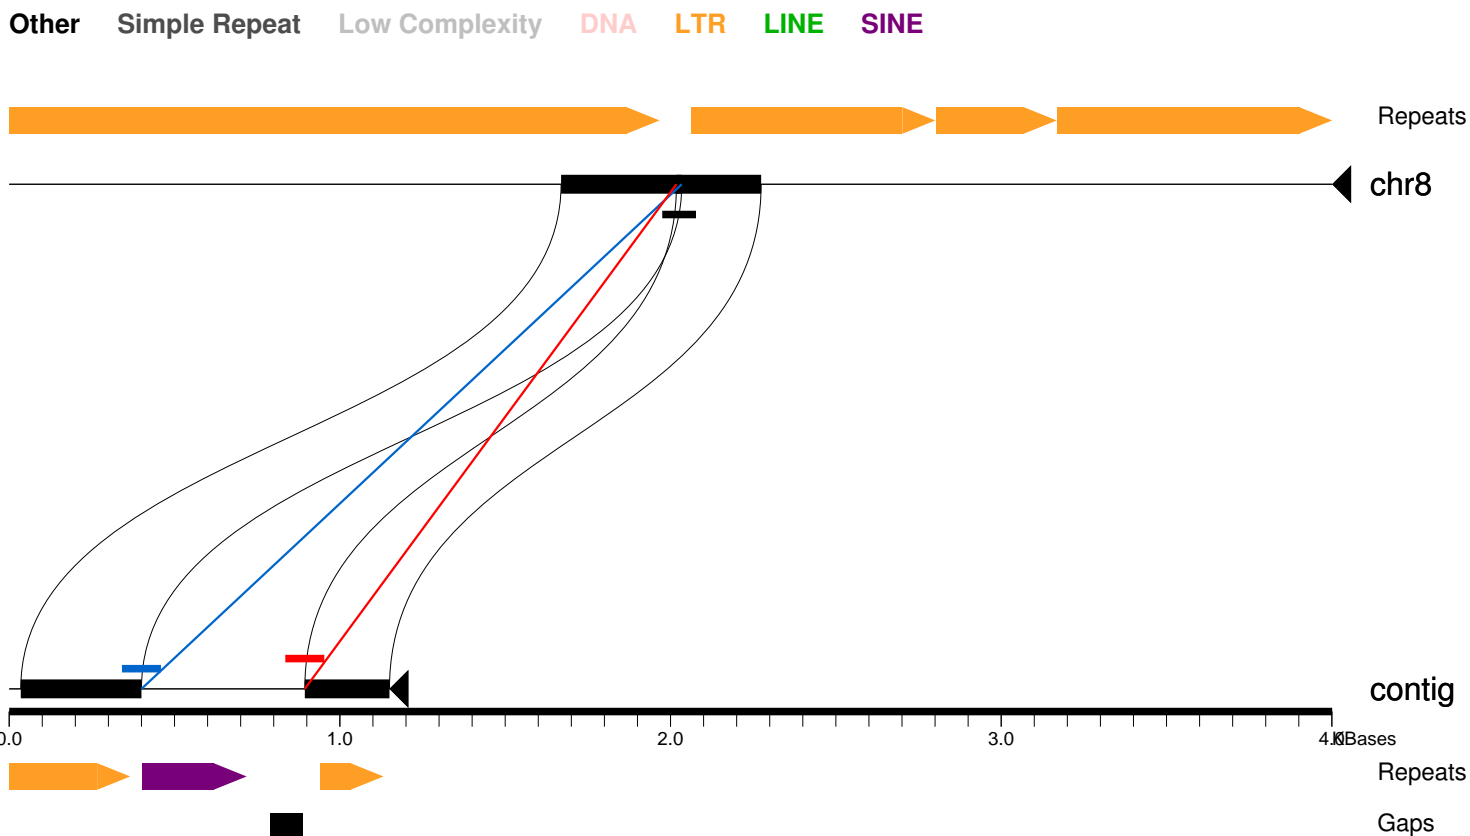

siteID: chr8\_96657277 Scaffold3 + Breakpoint: chr8:96657267

chr8:96657221-96657326

Overlap Length: 14 INS size: 316 Genotyped: Yes

```
left AC-CTTGAATAGCGAGGTAGCCTTGTACTCAATCTTCAGATGAGAAG-----TAACAGTTC
chrom AC-CTTGAATAGCGAGGTAGCCTTGTACTCAATCTTCAGATGAGAAG-----TAACAGTTC
right CCACCCGCCT--CGGCCTCCCAAAGTGCTGGGATTACAGGCGTGAGCCACCCGCGCCCGGCCTAACAGTTC
      1*1*11*11*11*11**111*11*111**1**11111*1***11*1**111111111111111111*****
```

```
left TCATTTTTTTTTTTTTTTTTTTTTTTTTTTTTTTTTTTTGTAGACGGAGTCTCGCTCTGTCGCCAGGTCG
chrom TCATTCATGGACACTTTTGTATAATT-----GGGTGTATCTGTTTACACTATCCTC
right TCATTCATGGACACTTTTGTATAATT-----GGGTGTATCTGTTTACACTATCCTC
      ****22*222222****2*2*22**222222222222222*2**2*22**2*2*222*2*22222
```

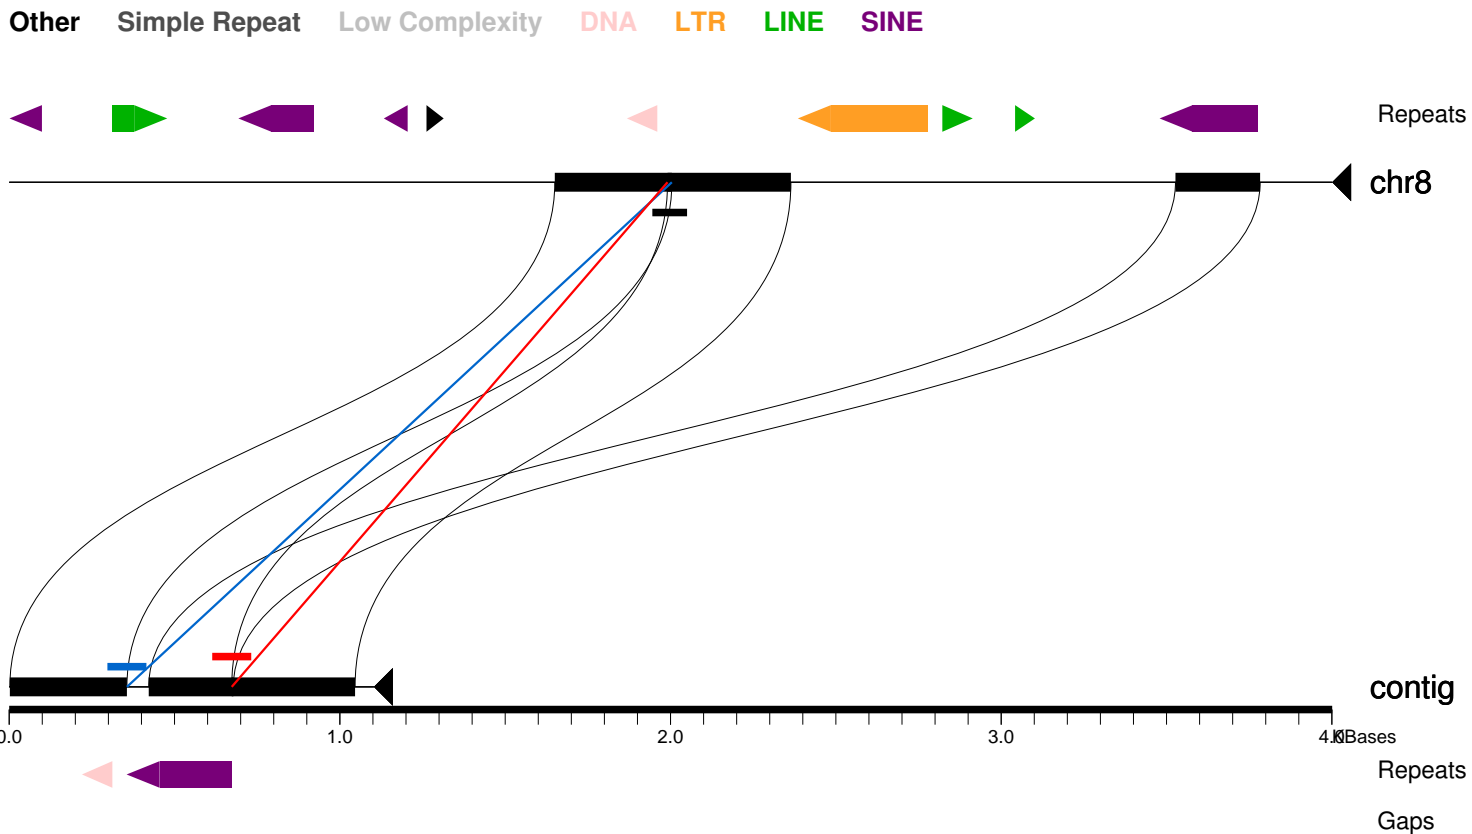





siteID: chr8\_9807884 Scaffitig6 + Breakpoint: chr8:9807891

chr8:9807731-9808061

Overlap Length: 11 INS size: 309 Genotyped: Yes

```
left -----GCAAGTAATGTGGCTATTTCTATCATTTCCAGTGAAAAGTCATCCCTGACGATTGGGAG
chrom TGTGTGTAATTTGCAAGTAATGTGGCTATTTCTATCATTTCCAGTGAAAAGTCATCCCTGACGATTGGGAG
right -GAATGGCGTGAAACCCGGGAAGCGG-----AGC-TTGCAGTGAGCCGAGATTGC-GCCACT--GCAG
      2NN22NNN2NN1*11*11*1*1**11111111*1*1**1*****111*11*11*1*1*11*11*1**
```

```
left AGCTCATAGGCTATGGCCTTT-CAAAACATTCTTCACTAAGGGGAGAGCTGAGTCTGGTGAGGATGGAGG
chrom AGCTCATAGGCTATGGCCTTT-CAAAACATTCTTCACTAAGGGGAGAGCTGAGTCTGGTGAGGATGGAGG
right TCCGCAG----TCTGGCCTGGGCGACAGA-----GCGAGA-CTCCGTCTCAAAAAAAAA-----
      11*1**11111*1*****111*1*1*1*111111111111*1***1**11****1111*11*1111111
```

```
left GCTGCGGTTCAAGTCAGCTATAAAAAGAGTCTG-----GGGCC-GGGCGCGG---T
chrom GCTGCGGTTCAAGTCAGCTATAAAAAGAGTCTGAACTCTCTCCTAGTCTCTTTGGTCCAGGGCGATGACTT
right -----AAAAAAAAAAAAAAAAGAGTCTGAACTCTCTCCTAGTCTCTTTGGTCCAGGGCGATGACTT
      111111111111**111*111*1*1*****22222222222222222222**2**2*****22*222*
```

```
left GGCTCACGCCTGT--AATCCCA----GCACTTTGGG-AG-----GCCGAGGCGGGTG--GATCATGAG
chrom GTCTGGGAAAATGTGGAATACAACAAAGGAGTCTGTGTAGACAACCTTGCTAGTTTGGTGCTGATTTTATAG
right GTCTGGGAAAATGTGGAATACAACAAAGGAGTCTGTGTAGACAACCTTGCTAGTTTGGTGCTGATTTTATAG
      *2**222222***22***2*2*2222*2*2*2**2*2**222222***2**222*****22***22*2**
```

```
left GTCAG-GAGATCGAGACCATCTGG--CTAACAAGGTGAAACCCCGTCTCTACTATA
chrom GTAAGTGAGAAGTAAAAACCTGCAAGTGCTTCTTTCTGAAAGCA---TCTCAAGGA---
right GTAAGTGAGAAGTAAAAACCTGCAAGTGCTTCTTTCTGAAAGCA---TC-----
      **2**2*****222*2*2*2*22*22**2222222***2*2222**11N1NN122
```

Other Simple Repeat Low Complexity DNA LTR LINE SINE

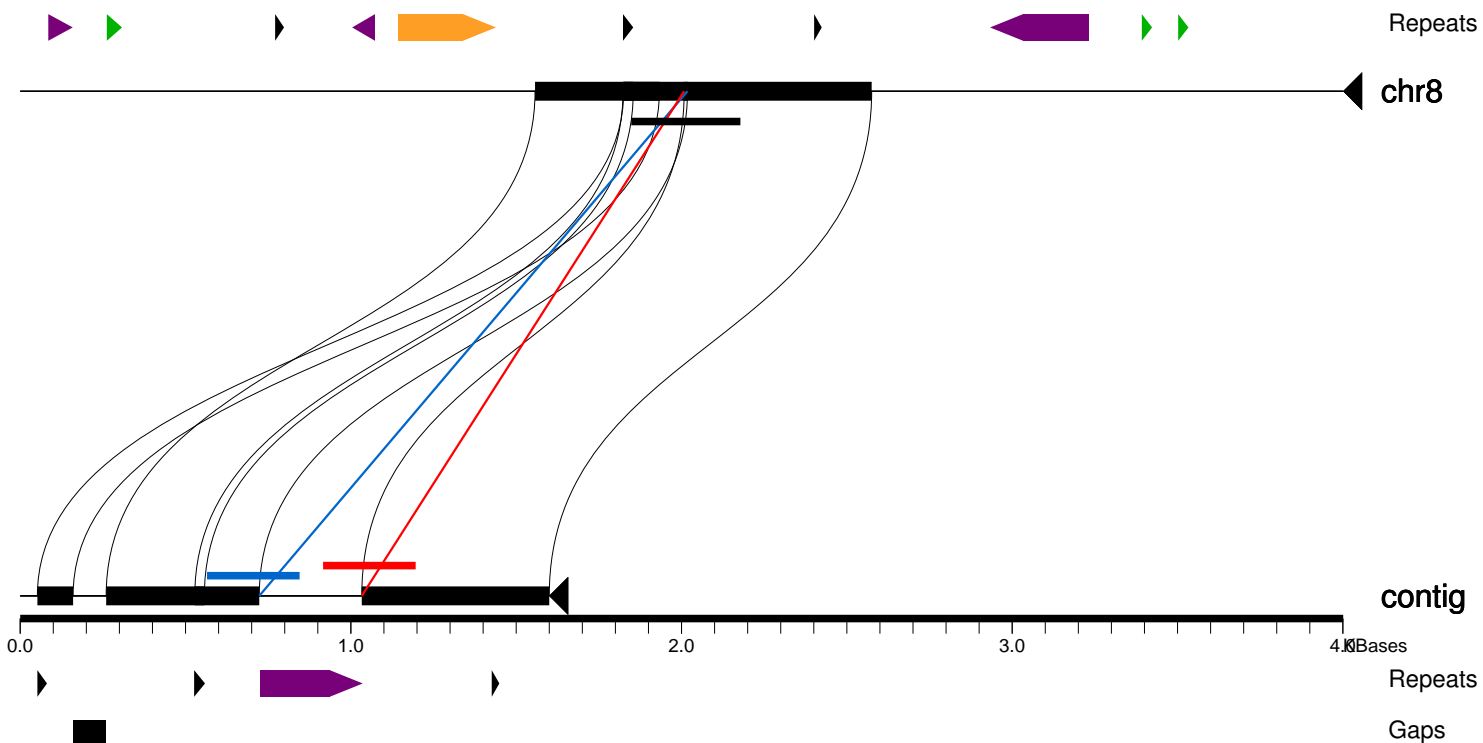

siteID: chr9\_100124946 Scaffitg2 + Breakpoint: chr9:100124918

chr9:100124758-100125123

Overlap Length: 46 INS size: 470 Genotyped: No

```
left -----CAGGCTTTTCCTCAGAAGGCACCAC
chrom AGTCCATCCCCCACACAAAGGCAGGAGATGACCTATGGCTTTCCAGGCTTTTCCTCAGAAGGCACCAC
right NNNNNNNNNNNN-----11111111111111111111111111111111

left AATGCTCATGGCTCTGGGACTCCACGGGGCGCAGTGAGGGGTGAGCGCCATCCTTAGTTTGCTGGTTGTC
chrom AATGCTCATGGCTCTGGGACTCCACGGGGCGCAGTGAGGGGTGAGCGCCATCCTTAGTTTGCTGGTTGTC
right 1111111111111111111111111111111111111111111111111111111111111111

left CATGGTGTGATGGATCTCAGCCGTGCCACCTTCCGCACACGGTTCATGGTTAGAAAAGACGGGGCAG--GC
chrom CATGGTGTGATGGATCTCAGCCGTGCCACCTTCCACACACGGTTCATGGTTAGAAAAGACGGGGCAGATGG
right -----GCCGGGCCCCCTGCCACACACGGTTCATGGTTAGAAAAGACGGGGCAGATGG
1111111111111111111111111111111111111111111111111111111111111111
***1***1***1**2************22*2

left CGGGCGCGGTGGCTCACGCCTGTAATCCAGCACT--TTGGGAGGCCGAGGCCGGGCGGATCACGAGG--T
chrom CTTTCTGGAGAGACATCACAG-AGCCACAGAAAGAGTTCTG-GGCCTTGGCGCCCTGCCACCAAGCCT
right CTTTCTGGAGAGACATCACAG-AGC-----
*222*22**2*222**222*2*2*221N111N1NN 11NN121111NN1111NN1N1NN111N1N1 1

left CAG-GAGATCG--AGAC-----CATCTGGCTAAC-----AAGGTG-----AAACCCCG
chrom CAGTGGGGTGTGTTAGACTCAAAGTTTACCCACATGCATATTTTATGGAAGGTGCATATCAGAAGCCCCA
right -----
111 1N1N1N1 1111 1NN1N11NN1NN 111111 11N1111N

left TCTCT-ACTAAA-----
chrom TGGCTGAGTAGACTCACT
right -----
1NN11 1N11N1
```

Other Simple Repeat Low Complexity DNA LTR LINE SINE

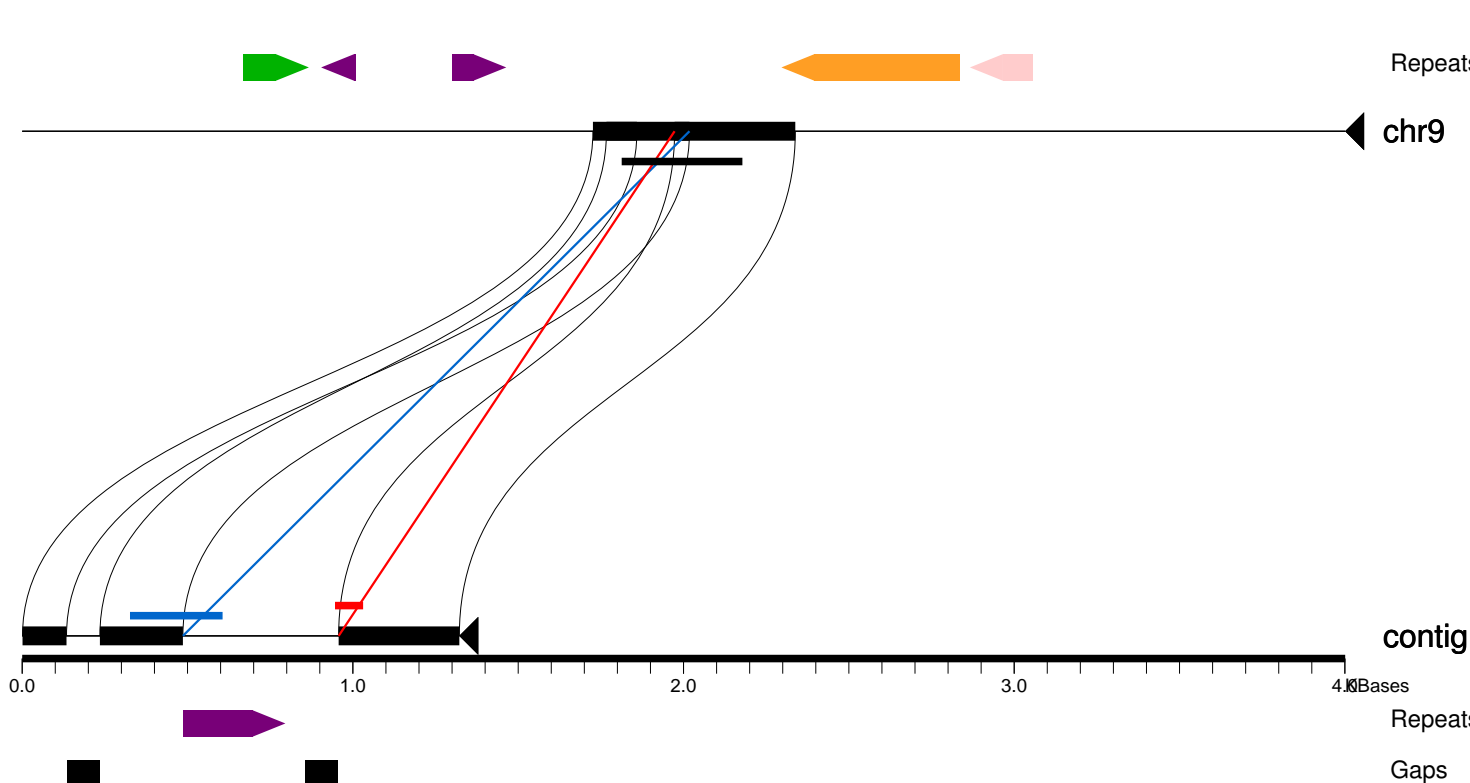





siteID: chr9\_103223386 Scaffitig1 - Breakpoint: chr9:103223389

chr9:103223349-103223448

Overlap Length: 17 INS size: 402 Genotyped: No

```

left  ATCTCTAGTCTTA-----AGTGCTAG-ACTCAAAGGGTTTCTGACT-----CCCAGGAAAGC
chrom ATCTCTAGTCTTA-----AGTGCTAG-ACTCAAAGGGTTTCTGACT-----CCCAGGAAAGC
right TCCACCCGCCTCGGCCTCCCAGAGTGCTGGGATTACAAGCGTGAGCCACCGCGCCCGGC CCCAGGAAAGC
      11*1*11*1**111111111111*****1*1*11**1**11111**1111111111******
    
```

```

left  ATTCCTTTNNNNNNNNNNNNNNNNNNNNNNNNNNNNNNNNNNNNNNNNNNNNNNNNNNNNNNNNNNNNNN
chrom ATTCCTTATTATTTTGTGGCTTGCTTTACCACCTTACCATATCTTTACTT-----
right ATTCCTTATTATTTTGTGGCTTGCTTTACCACCTTACCATATCTTTACTT-----
      *****2**2222222222222222222222222222222222222222222222222222222
    
```

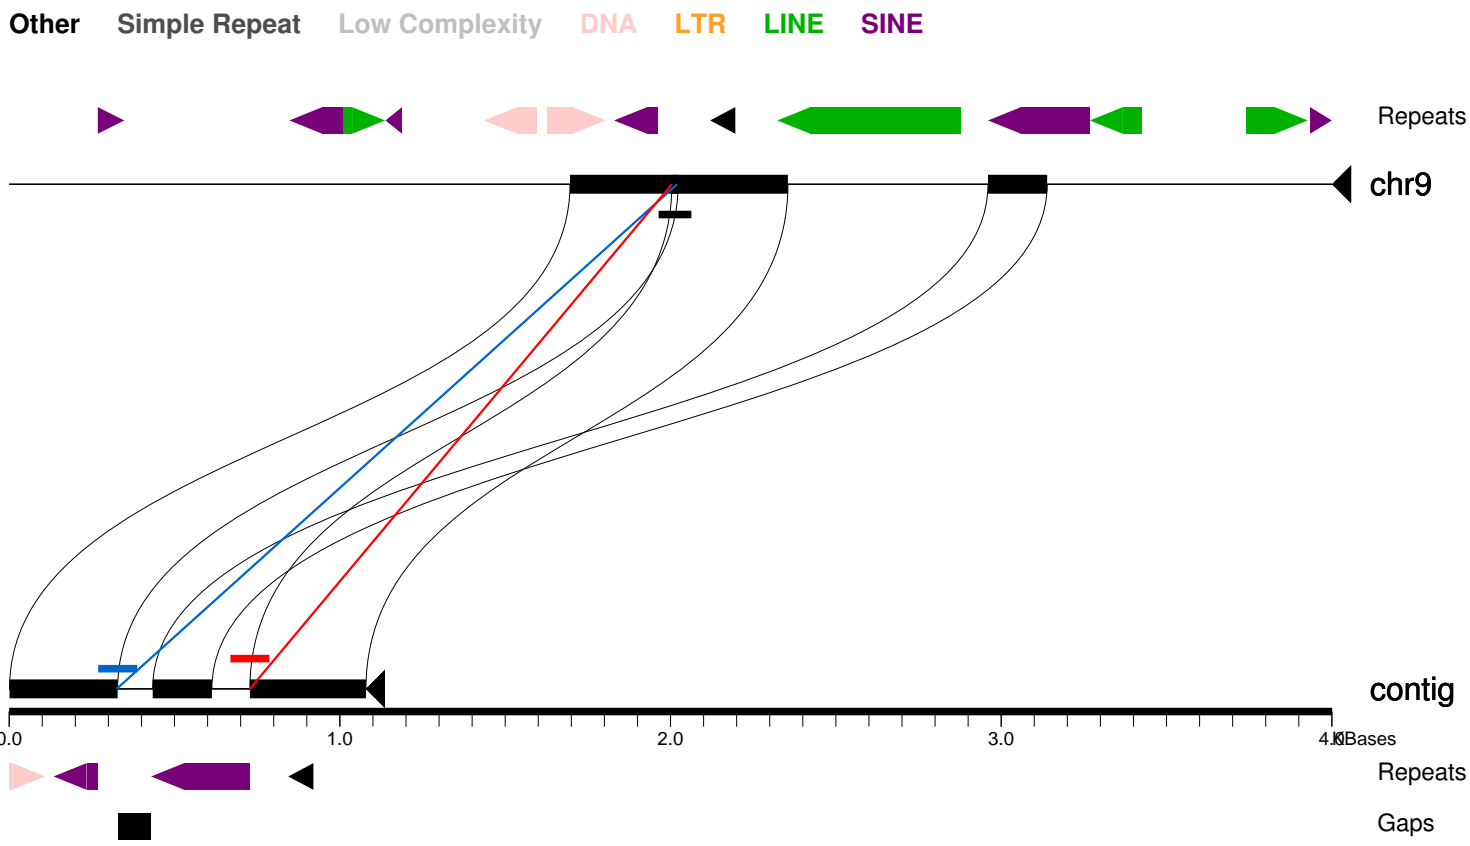

siteID: chr9\_104565396 Scaffitg1 + Breakpoint: chr9:104565397  
chr9:104565237-104565570  
Overlap Length: 14 INS size: 257 Genotyped: No

left NNNNNNNNNNNNNNNNNNNNNNNNNNNNNNNNNNNNNNNNNNNNNNNNNNNNNNNNNNNNNNNNNNNNNNNNNNNNNNNNNNNNNNNNNNNNN  
chrom GCTGACCCCATCTGATGGCACTGGCACTGGTTCTCTGCCCTCAAGATGCAGTCTTCTGCCTGCTGCCTGTGA  
right -CTGA-----GGCAGGAGAA-TGG--CGTGAACCCGGGAGGCGGAGCT-TGCAGTGAGCCGAGA  
N2222NNNNNNNNNNNN2222NNN2N2N222NN2N22NN2N2NN2N2NN2N2NN2N2NNN2N222NNNNN222NNN2

left NNNNNNNNNN-----GTGCCCTACTGCTGCAAGAGCTGTGGCAAAAAGCAGCTGGCTAGGCA  
chrom TTGCCCTTCACTGCAAGCAGGACTGTGCCCTACTGCTGCAAGAGCTGTGGCAAAAAGCAGCTGGCTAGGCA  
right T--CCCGCCACTGCACTCCAGCCTGGGC-----GACAGAGCG-----AGACTCCGTCTCAAAA  
2NN222NN222222NN2NN2N22\*1\*\*111111111\*11\*\*\*\*\*111111111\*\*111\*1\*1\*\*1111\*

left GATGCAAAAATAGTGGGGTTAAAAATATGTCATTAGGGAGGCGGAGGC-----GGGCGG  
chrom GATGCAAAAATAGTGGGGTTAAAAATATGTCATTAAAAATGGTCAACACCAAAAATAAGAACTTCTGGGTAA  
right AAAAAAAAAAAAA-----AAAATATGTCATTAAAAATGGTCAACACCAAAAATAAGAACTTCTGGGTAA  
1\*1111\*\*\*\*\*1\*111111111\*\*\*\*\*2222\*2\*2\*22\*2222222222222222222\*\*\*222

left A-TCACGAGGTCAGGAGATCG---AG-ACCATCCCGGCTAAAACGGTGA-AACCCCGTCTCTAC-TAAAA  
chrom AGTCAGACCCTGAGGAAAATGGGTTCAGCATGATCCAAAAGAGATAGGTCGACAACCTCAGAGTTTGCCTTGGGA  
right AGTCAGACCCTGAGGAAAATGGGTTCAGCATGATCCAAAAGAGATAGGTCGACAACCTCAGAGTTTGCCTTGGGA  
\*2\*\*\*22222\*2\*\*\*\*2\*\*2\*222\*2\*22\*\*22\*22\*\*\*222222\*2\*2\*22\*\*2\*\*\*2\*2\*22\*2\*2\*222\*

left ATACAAAA-----AATTAGCCGGGCGTAGTGGCGGGCGCTGTA-----  
chrom ATAGAAGAGGATTTTGGAGGTGGACAGGTGAAAAGGAGAGGGGAAGAAAAGAGAGA  
right ATAGAAGAGGATTTTGGAGGTGGACAGGTGAAAAGGAGAGGGAA-----  
\*\*\*2\*\*2\*22222222\*22\*2\*2\*2\*\*2\*22\*2\*2\*22NNN1

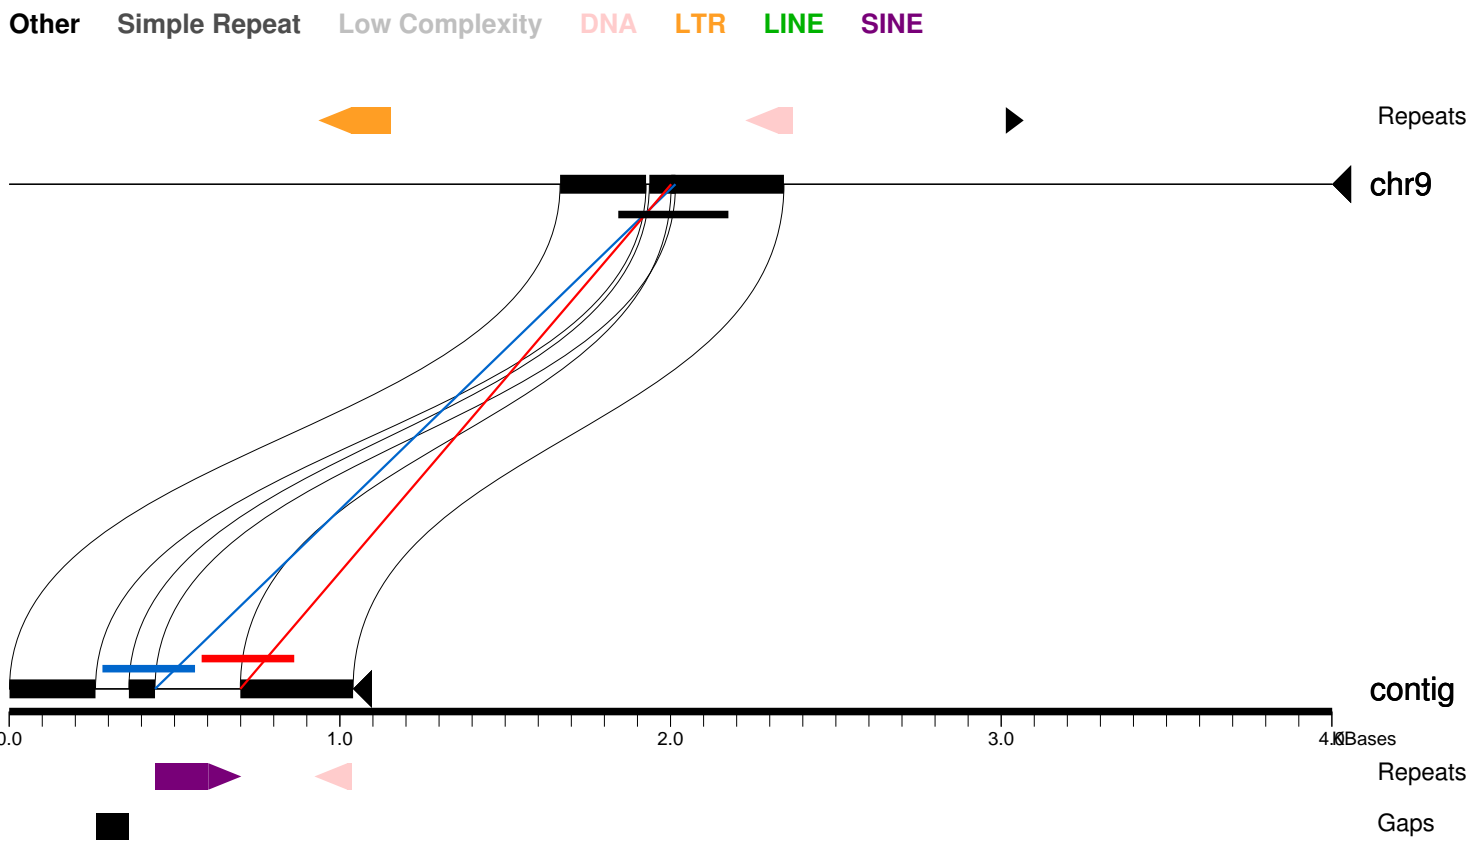

siteID: chr9\_105450614 Scafftig7 + Breakpoint: chr9:105450605

chr9:105450445-105450779

Overlap Length: 15 INS size: 295 Genotyped: Yes

```
left -----AAAACAGTATGGACACATACATGCGCATGCACACACACACACACTCTCTCTCTC
chrom TATGGTTAATGACAAAAACAGTATGGACACATACATGCGCATGCACACACACACACACTCTCTCTCTC
right -----AGGCAGGAGAAATGGCGTGAACCCGGG-AGGCGGA-GCTTGCAGTGAGCCGAGATCCCGC-CAC
      2NNN2NN*1**11*11**1**1*1111*1***1*1**111**111*11*11N1**1*1*1*1*
```

```
left TCTCTCTCCCCCAAATGTCTTTTGGATTTAAAAGAAAAGTATCTGAATATTGAACATTCAGCCATTATAT
chrom TCTCTCTCCCCCAAATGTCTTTTGGATTTAAAAGAAAAGTATCTGAATATTGAACATTCAGCCATTATAT
right TG-CACTCCAGCC-----TGGGCGACAGAGCGAGACTCCG--TCTCAAAAAAAAA-----
      *11*1***11**1111111111**111111*1**11**11**1*11*1*11**1*111*1111111111
```

```
left ACAGTCATAAAACCTCTTTTAAAAAACAAGCAGGCCGGGCGCGGTGGCTCACGCCTGTAATCCCAGCA
chrom ACAGTCATAAAACCTCTTTTAAAAAACAAGCAGAACATGACTCTAAAGGCTGAATCTCTTCTTAGTAGAC
right -----AAAAA-----A*****CAAGCAGAATGACTCTAAAGGCTGAATCTCTTCTTAGTAGAC
      111111*1***111111111******222*22222222***2*22*222*22*222**22
```

```
left CTTTGGGAGGCCG-----AGGCGGCGGATCACGAGGT--CAGGAGATCGAGACCATCCCGGCT
chrom TTTTAAAAAAGTAATATACATATAAAAAAGATGCAAAGCATAAAAGTTTCAGCTCATCAAAATTTATACCTAGT
right TTTTAAAAAAGTAATATACATATAAAAAAGATGCAAAGCATAAAAGTTTCAGCTCATCAAAATTTATACCTAGT
      2***222*2*2222222222222*22222**22*2**22*2**22***222***2*2222**2**222*
```

```
left AAAA---CGGTGAAAC-CCCGTCTCTACTAA-----A
chrom AAACAAACCTATGTAACCTCCCATCCACATGAAGAAAAGAGAATATGATAGTCCACCA
right AAACAAACCTATGTAACCTCCCATCCACATGAAGAAAAGAGAATATGATA-----
      ***22222*22**2***2***2**222*22**222222222222222 1
```

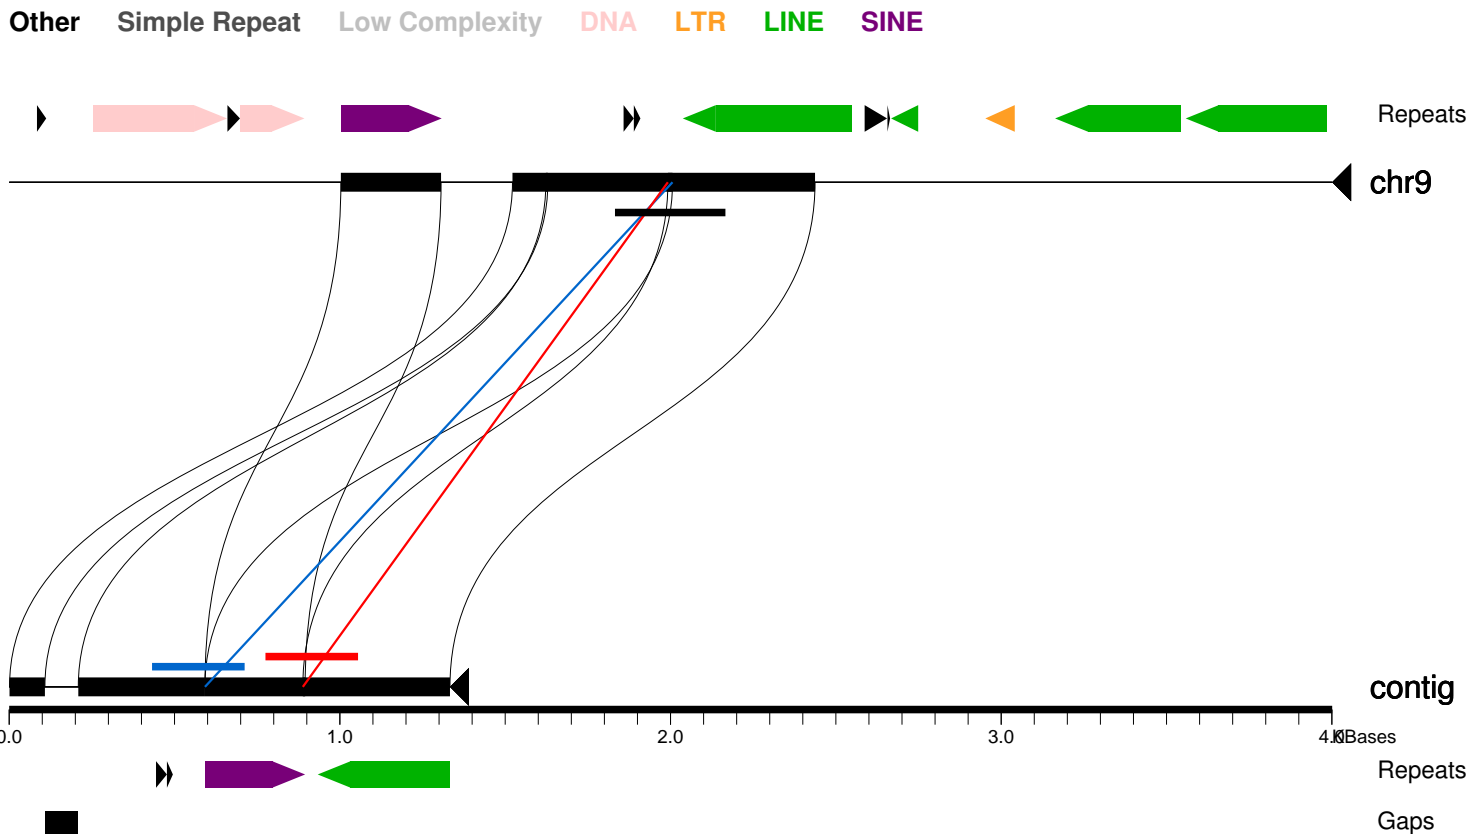





siteID: chr9\_111949736 Scafftig1 + Breakpoint: chr9:111949724

chr9:111949687-111949783

Overlap Length: 8 INS size: 310 Genotyped: Yes

```
left   T-----GCATTTGC-----AAAGTCTTAG---TCCATGGTTCATTTT-----GTTGACTGTTTCTT
chrom  T-----GCATTTGC-----AAAGTCTTAG---TCCATGGTTCATTTT-----GTTGACTGTTTCTA
right  CCACCCGCCTCGGCCTCCCAAAGTGTCTGGGATTACAGGCGTGAGCCACCGCGCCCGGCCGACTGTTTCTA
       111111**1*11**11111*****11*1*111*1**1*11*1*111111111111111*11*****2*2
```

```
left   TTTTTTTTTTTTTTTTTTTTTTGGAGACGGAGTCTCGCTCTGTCTGCCAGGCCGGACTGCGGACTGCAGTGGCG
chrom  AATCTAGTTTTTGTCA-----AGTGAATCCATCTGAGTCACC-----TGCAGTTAAC
right  AATCTAGTTTTTGTCA-----AGTGAATCCATCTGAGTCACC-----TGCAGTTAAC
       22*2*22*****22*2222222*22**2**222**22**2**2222222222222222*****2222
```

```
left   C
chrom  T
right  T
       2
```

Other Simple Repeat Low Complexity DNA LTR LINE SINE

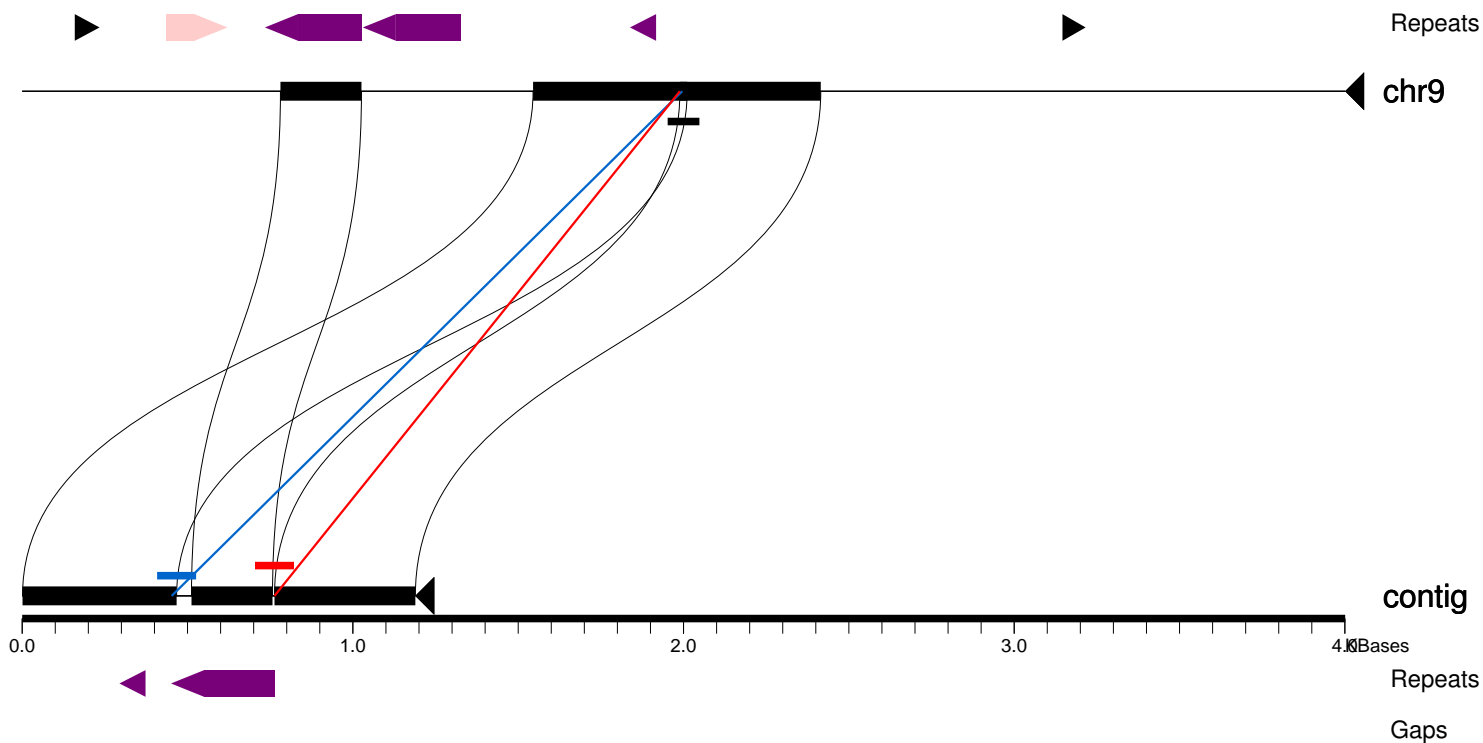



siteID: chr9\_11329333 Scaffitg1 - Breakpoint: chr9:11329314

chr9:11329154-11329486

Overlap Length: 13 INS size: 316 Genotyped: Yes

```
left  -----AAAAATATTTAGACTTCTTTTGCTATGCTTAGTGAATTTTTGAGGCTATCTAAATGACT
chrom CATACTGCAAAAAATATTTAGACTTCTTTTGCTATGCTTAGTGAATTTTTGAGGCTATCTAAATGACT
right TTTA---GTAGAGACGGGGTTTCACCTTGTAGCCAGGATG-----GTCTCGATCTCCTGACCT
NN22  2N21*1*11111**11**1*11**1**1*1*111111111111*111*1****111111**
```

```
left  CATGATATTTAGATCTTTGCTATGGATTATATTTTTGTCACTATTATGTGTCTTTTTGTTTTAATTATTT
chrom CATGATATTTAGATCTTTGCTATGGATTATATTTTTGTCACTATTATGTGTCTTTTTGTTTTAATTATTT
right CATGATCCACCCGCCTCGGCC-----TCCCAAAGTGCTGGGATTACAGGCGTGAGCCACCG
*****11111111**11**111111111111111*11**111*11**1*11*1111*11*1*111*111
```

```
left  CACTTTTAATTC AATGTTGTCAGATATTAATTTTT-----TTTTTTTTTTT-----TTTTT
chrom CACTTTTAATTC AATGTTGTCAGATATTAATTTCTTAATCACTGCTTTCTCATTTTGCATTTGCCTTTCT
right CGCCCGGCC-----CAGATATTAATTTCTTAATCACTGCTTTCTCATTTTGCATTTGCCTTTCT
*1*11111111111111111111*1*****2**222222222**2*22****222222222**2*
```

```
left  TT-----TTTTTTT GAGACGGAGTCTCGCTC-TGTCGCC---AGGTCG---GACTGC---GGACTG
chrom CTCTTCTCCATTTTCTTGTAGAGTAAATTCCTCATGAAGCCATAAAATGTAGCTTGAAAGAAAGGGAGTG
right CTCTTCTCCATTTTCTTGTAGAGTAAATTCCTCATGAAGCCATAAAATGTAGCTTGAAAGAAAGGGAGTG
2*22222222**2**2**22*22*2222*22**2**2**22**2222*2**2*222**22*2222**2**
```

```
left  CAGT-GGCGCAAT--CTCGGCTCACTGCAAGCTCC-GCTTCCCGGGTTCAC---
chrom AAGTAGGAGAAAATGACTAGGAAG-CTTCAGCCAAGTCTTATGTGCTTCGCTTC
right AAGTAGGAGAAAATGACTAGGAAG-CTTCAGCCAAGTCTTATGTGCTTCGCTTC-----
2**2**2*2**22**2**2222**2**22*22*2**22**2**2NNN1N111N1
```

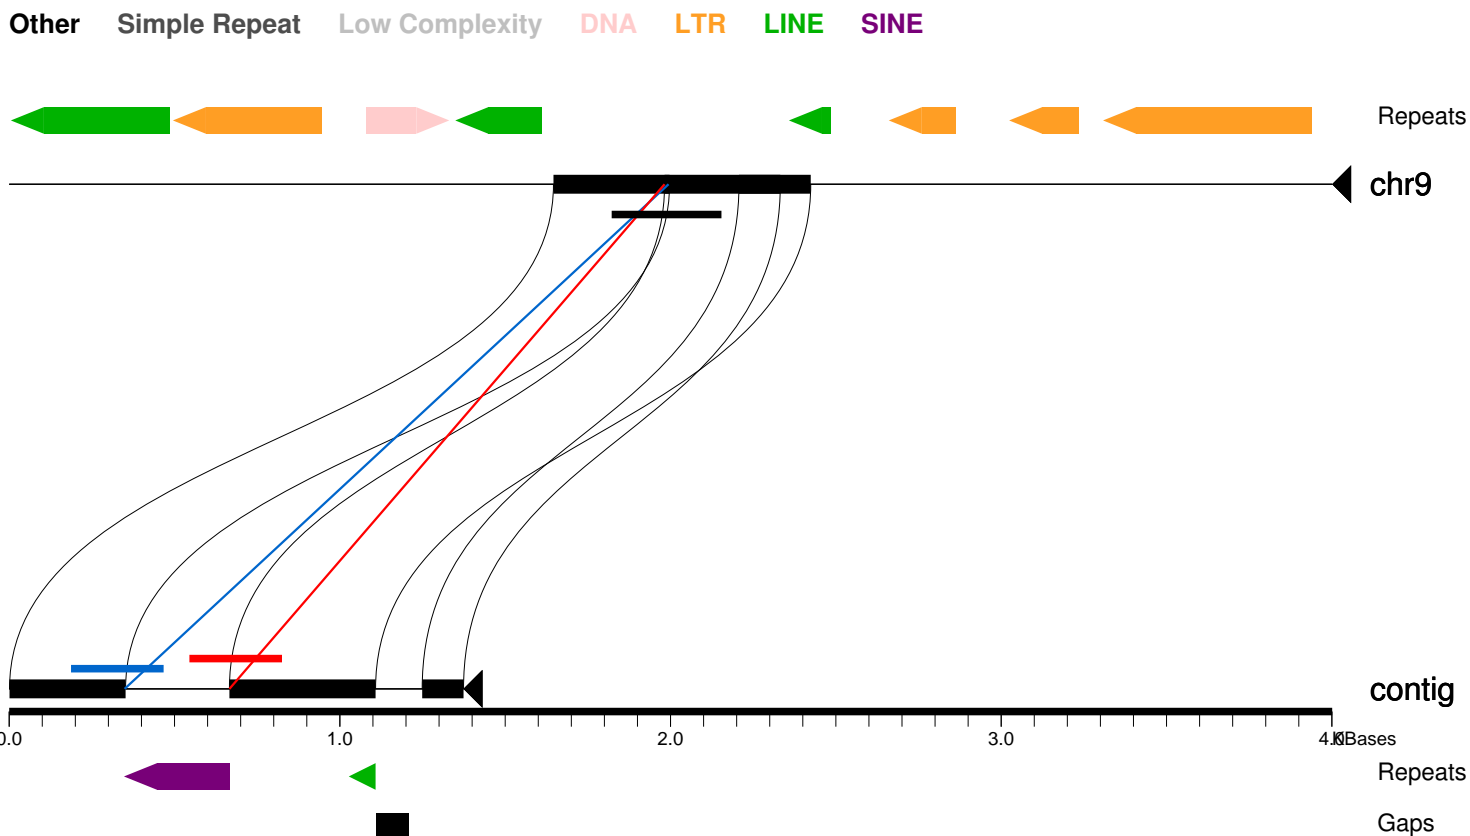

















siteID: chr9\_128980173 Scaffold4 - Breakpoint: chr9:128980166

chr9:128980117-128980220

Overlap Length: 11 INS size: 167 Genotyped: Yes

```
left  CCAAAAAG-----GCCAC-----CACCTCCTTTGCCCTATTGACAGCCTTGCTTAAGAA-----TCTCTC
chrom CCAAAAAG-----GCCAC-----CACCTCCTTTGCCCTATTGACAGCCTTGCTTAAGAA-----TCTCTC
right CACTCCAGCCTGGGCGACAGAGCCAGACGCTGTCTCAAAAAAAAAAAAAAAAAAAAAAAAAAAAAAAAAAATCTCTC
      *111111**111111**1**111111**111111**1*11*11*111*1*1111111111**1**111111*****
```

```
left  ACCTTGCGGTGGCGGGCTCCTGTAGTCCCAGCTACTTGAGAGGCTGAGGCAGGAGAATGGCGTG
chrom ACCTTAA-----CCCGTGCATTTTTACAAACT-----GCTGCAGCCAGATCAGTTTAGG
right ACCTTAA-----CCCGTGCATTTTTACAAACT-----GCTGCAGCCAGATCAGTTTAGG
      ****22222222222*2*2*2*2*222*222***222222****22*22*22*22*222222*
```

Other Simple Repeat Low Complexity DNA LTR LINE SINE

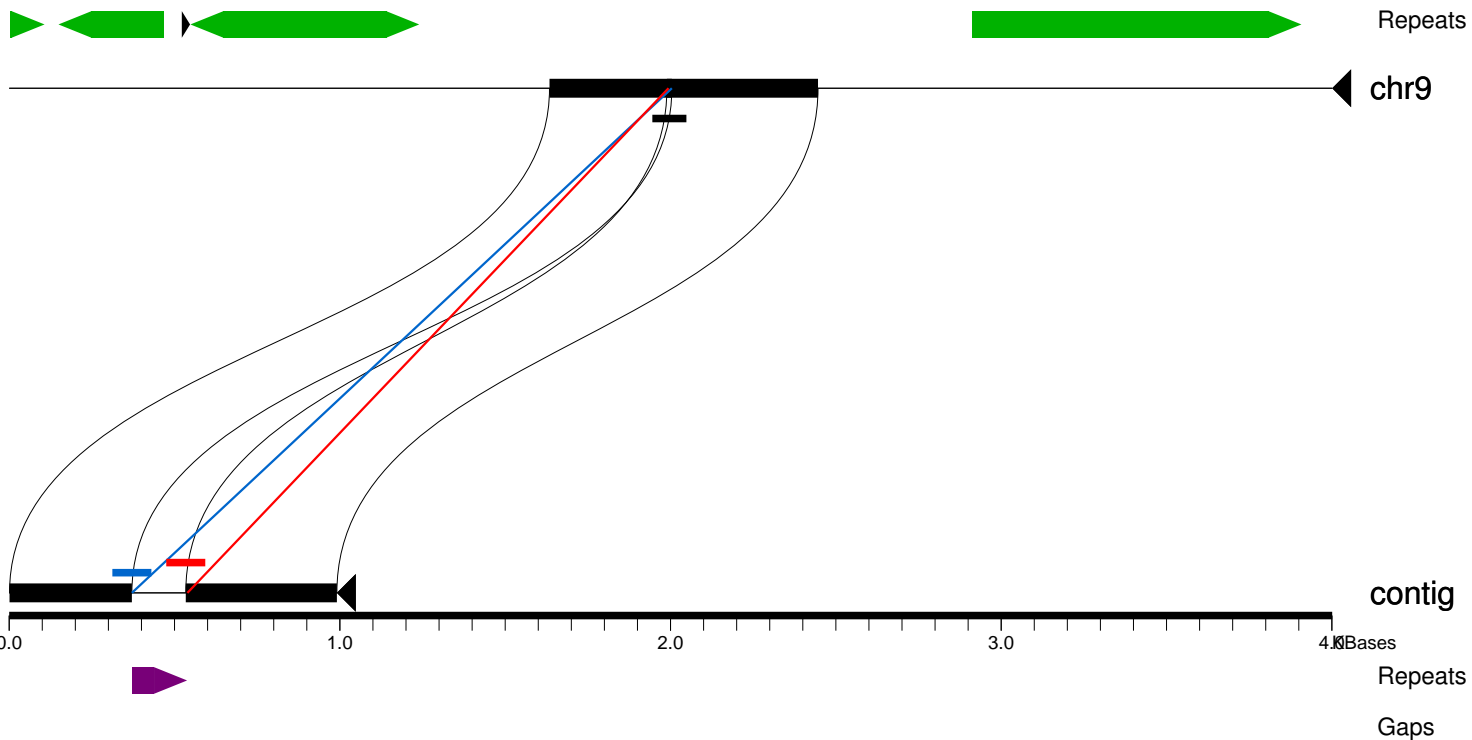

siteID: chr9\_14877433 Scaffitg2 + Breakpoint: chr9:14877434

chr9:14877274-14877605

Overlap Length: 12 INS size: 297 Genotyped: Yes

left C-----TGGGTGGTGTATAAAAAGACATCTCACACTTTATGAAGCCAAAATFGAGCTCTCAATCTTCCCTC  
chrom CATCTCTGGGTGGTGTATAAAAAGACATCTCACACTTTATGAAGCCAAAATFGAGCTCTCAATCTTCCCTC  
right T---TGTATTTTTAGTAGAGACGGGGTTTCAC-CTTGTT--AGCCAGGATGG---TCTCGATCT-CCTGA  
1 2N\*111\*111\*\*\*1\*1\*1\*111\*1\*\*\*\*1\*\*\*11\*11\*\*\*\*\*11\*1\*111\*\*\*\*1\*\*\*\*1\*\*111

left CCTCAGTCTTCCCTTACCTTAATTAACAGCAACTCCAACCTTTTCAGTTGTTCCCTTTCATCACACATTC  
chrom CCTCAGTCTTCCCTTACCTTAATTAACAGCAACTCCAACCTTTTCAGTTGTTCCCTTTCATCACACATTC  
right CCTCA-TGATCC--ACCCGCCT---CGGC--CTCCCAAAGTGCTGGGATTACAGGCGTGAGC-CAC----  
\*\*\*\*\*1\*11\*\*\*11\*\*\*1111\*111\*1\*\*11\*\*\*\*1\*111\*1\*1\*111\*\*1\*111\*1\*1\*1\*\*1111

left TAAATCTAGACAAAAAATCTTGTGTTTCTTTTFTTTTTTTTTTTTTTTTGGAGACGG-----  
chrom TAAATCTAGACAAAAAATCTTGTGTTTCTTTATGGTAGACAGATCTTAGGTGACCCCCCAAATAATTC  
right -----CGTGTGTTTCTTTATGGTAGACAGATCTTAGGTGACCCCCCAAATAATTC  
11111111111111111111\*1\*\*\*\*\*\*2\*22\*222222\*2\*\*22\*2\*\*\*22222222222222

left AGTCTCGCTCTGTCGCCAGGCCGAC----TGCG-GACTGCAG----TGGCGCAATCTCGGCTCACTGC  
chrom AGTCTCCTAGTATCCAAAAGTTCTTCCCTTGAGTGCCAGCAGAATCTGTAACACTTCCAACCAACAGA  
right AGTCTCCTAGTATCCAAAAGTTCTTCCCTTGAGTGCCAGCAGAATCTGTAACACTTCCAACCAACAGA  
\*\*\*\*\*2222\*2\*\*2222\*\*22\*222\*2222\*\*2\*2\*2\*2\*\*\*2222\*\*222\*2\*22\*22\*2\*2\*2

left A---AGCTCCGCTTCCCGGGTTCACGCC----ATT-----  
chrom ATTGAACAAAAGGTGATGGGTGTCACCTCTATGATTACATTTTTGTTATACAGG  
right ATTGAACAAAAGGTGATGGGTGTCACCTCTATGATTACATTTT-----  
\*222\*2\*222\*2\*2222\*\*22\*\*\*2\*\*2222\*\*222222

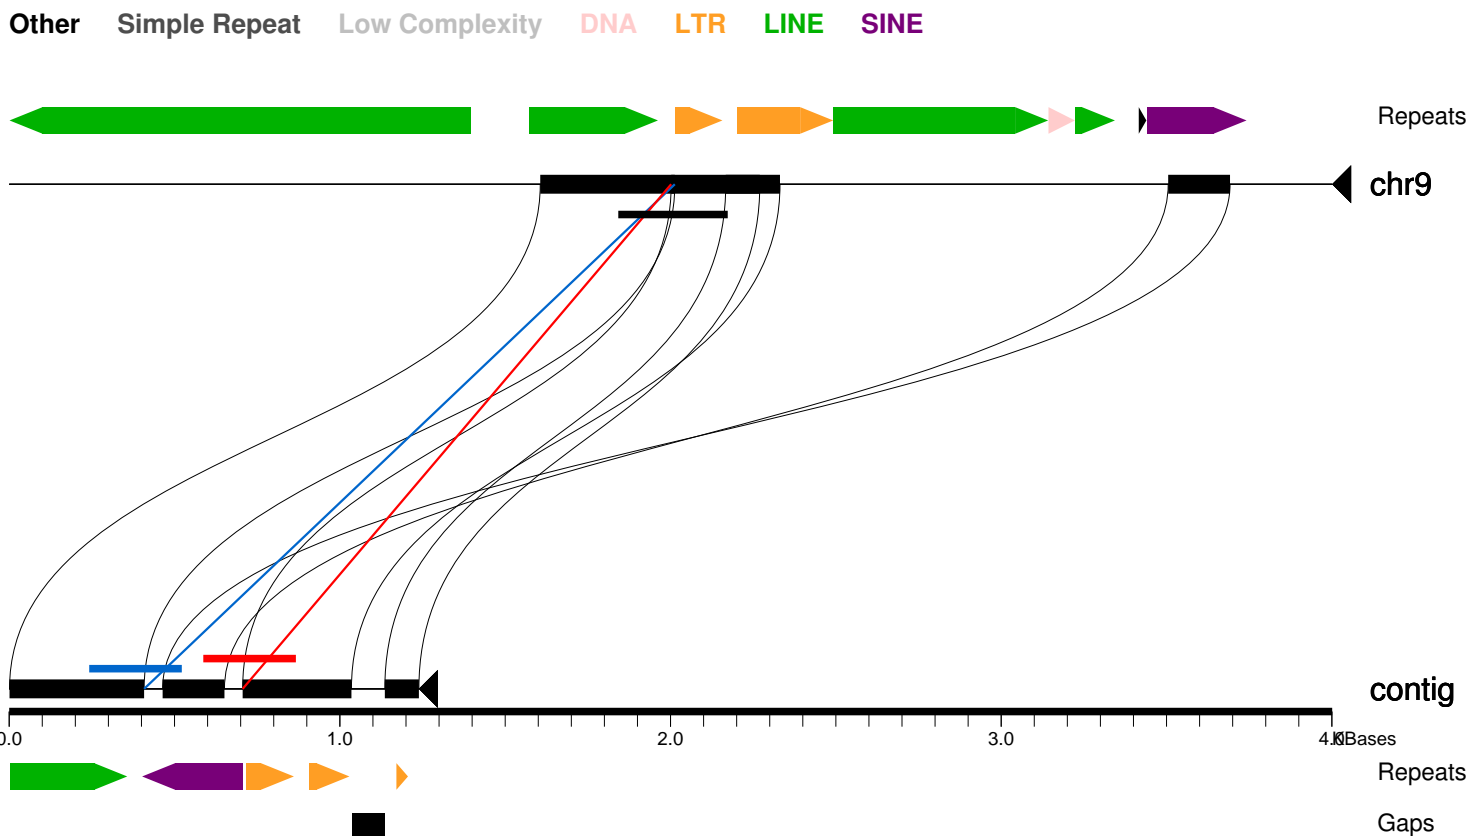

siteID: chr9\_15831802 Scafftig5 + Breakpoint: chr9:15831808

chr9:15831762-15831867

Overlap Length: 14 INS size: 291 Genotyped: Yes

```
left  AGTAACTAC-TTTACCTTGAAATGTGCA-----AAAGGAATCA---ATAGG---CTTACAAAACCTGCCT
chrom AGTAACTAC-TTTACCTTGAAATGTGCA-----AAAGGAATCA---ATAGG---CTTACAAAACCTGCCT
right TCCGCCCGCCTCGGCCTCCCAAAGTGCTGGGATTACAGGCGTGAGCCACCGCGCCCGGC CAAAACCTGCCT
      11111*11*1*111***111**1****1111111*1***11*1*111*11*1111*111*****
```

```
left  TTTTTTTTTTTTTTGGAGACGGAGTCTCGCTCTGTCGCCAGGCTGGAGTGCAGTGGCGGGAT
chrom TTTAAAAAATGTTTGTAA-----TCATATTTTTCCTGGTAGCCTGAATATCA-----AT
right TTTAAAAAATGTTTGTAA-----TCATATTTTTCCTGGTAGCCTGAATATCA-----AT
      **222222*2****22*22222**2222*2*22*2222**21**2*222**22222222**
```

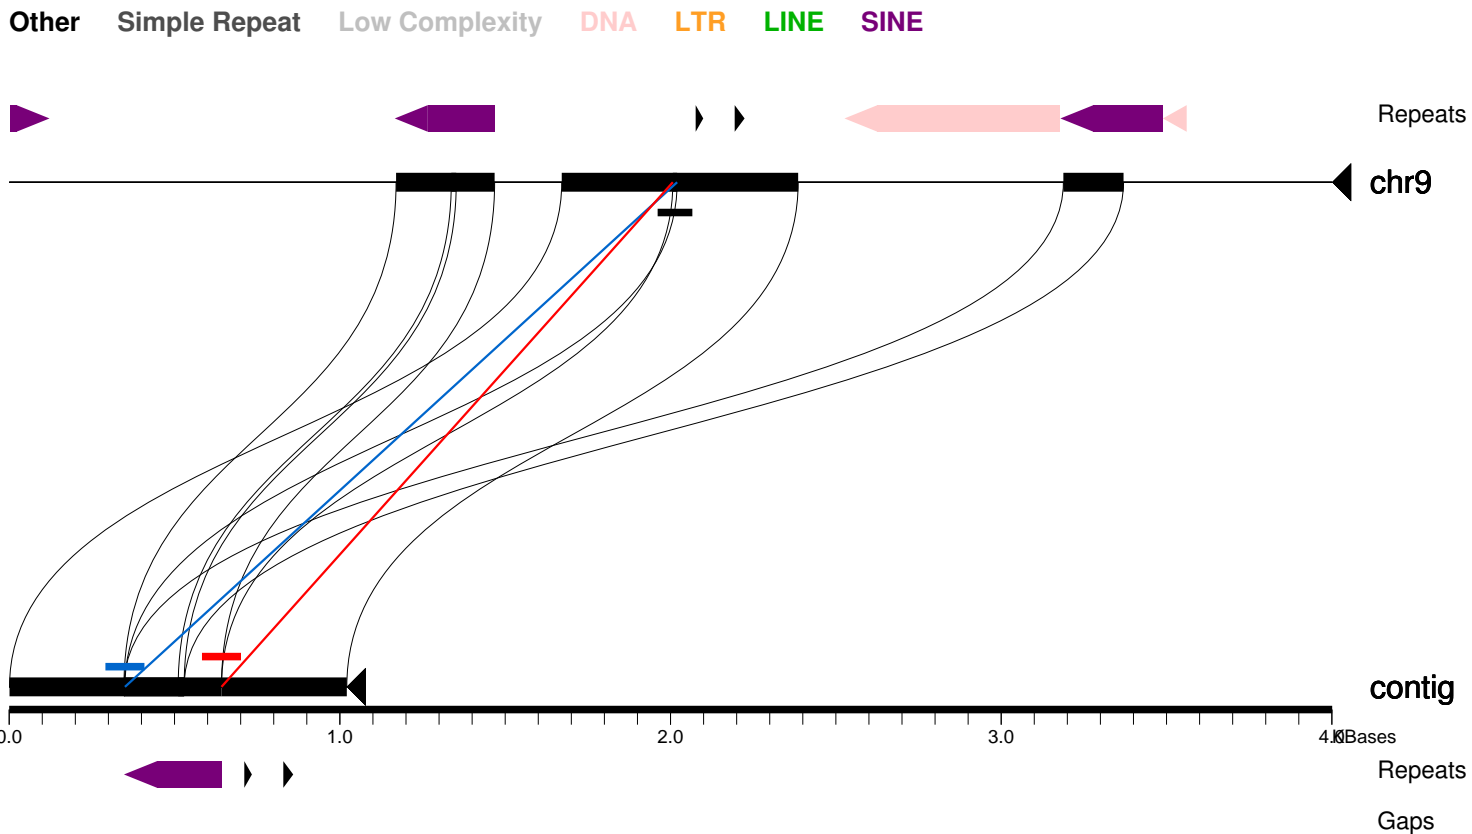

siteID: chr9\_1631825 Scaffitg4 + Breakpoint: chr9:1631814

chr9:1631779-1631873

Overlap Length: 13 INS size: 331 Genotyped: Yes

```
left  CCCCCAACTCCTCCTCCTAAA-----ACAG-----CAAGGTTTTC-----ATATGTTTTCT
chrom CCCCCAACTCCTCCTCCTAAA-----ACAG-----CAAGGTTTTC-----ATATGTTTTCT
right CACCCGCCTCGGCCTCCCAAAGTGCTGGGATTACAGGCGTGAGCCACCGCGCCCGGCCTATATGTTTTCT
      *1***11***11*****1***111111111111***111111111111***11*1111*11111******
```

```
left  TTTTTTTTTTTTTTTTTTTTTTTTTTTTTTTTTTTTTTTTTTTTTTTTTTTGAGACGGAGTCTCGCTCTGTGCCCCA
chrom TTTGTTGCCTTCTTTGGAAGATTAGATTTAGAAAATAATTTCT-----GAAAGAGT-----
right TTGTTGCCTTCTTTGGAAGATTAGATTTAGAAAATAATTTCT-----GAAAGAGT-----
      **2**222**2***222222**222***22222*22***2*22222**22***22222222222222222222
```

```
left  GGC
chrom ---
right ---
      222
```

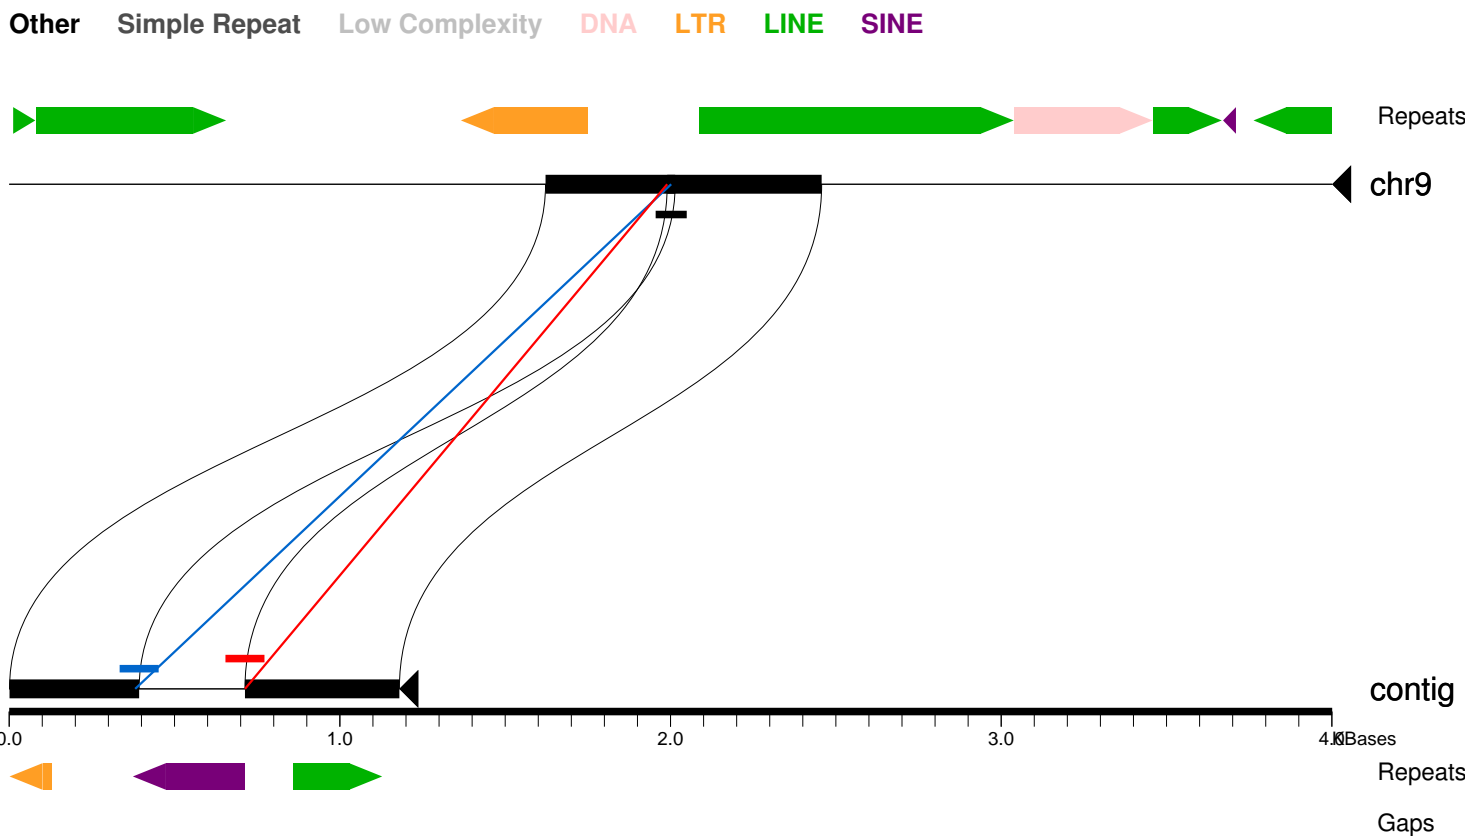

siteID: chr9\_1665594 Scaffitg1 - Breakpoint: chr9:1665610

chr9:1665450-1665824

Overlap Length: 55 INS size: 389 Genotyped: No

```
left -----  
chrom CATGTAACATACAATTTCATGCACTTAAAGTGTATAAATTAAATGGCTTTTGGTACATTCATAGGGCTGTGC  
right TTTAGTAGAGACGGGGTTT-CACCT----TGTTAGCCAGGATGG-TCTCGATC---TCCT-GACCTCATG  
NN2NNN2N2N22NNNNNN2 222N2 222NNNNNNNN2222 2N2N2N2N 22N2 2NN22NNNN
```

```
left -----ATAATCAAGAAAATATGTAAATTTTGAAAAGACAAAAGGCCAAGGCCATCTATTTGCCACT  
chrom AACCACCATCATAATCAAGAAAATATGTAAATTTTGAAAAGACAAAAGGCCAAGGCCATCTATTTGCCACT  
right ATCCACCCCGCCTCGGCCTCCCAAAGTGC-----TGGGATTACA---GGCG-----TGAGCCAC-  
2N22222NN21*1111*111111**11**111111*1*1*11***111***111111111111*11*****1
```

```
left TCTGATTGTCACCTGCTGGTAAGCACTGGGTTTCTTGGCACCCCTTTTGTAGTATCCAGTCACCAGCTTC  
chrom TCTGATTGTCACCTGCTGGTAAGCACTGGGTTTCTTGGCACCCCTTTTGTAGTATCCAGTCACCAGCTTC  
right -----CGCGCCCGGCCAGCACTGGGTTTCTTGGCACCCCTTTTGTAGTATCCAGTCACCAGCTTC  
1111111111*1*11*1**11*****2*****
```

```
left TTATANNNNNNNNNNN-----  
chrom TTATATGGCAACAGGCATTTGCAGCAGCAGTGGTGGCTTCCTGGTGACTTGATTGAGCCTCCTAATTATT  
right TTATATGGCAACAGGCATTTGCAGCAGCAGTGGTGGCTTCCTGGTGACTTGATTGAGCCTCCTAATTATT  
*****22222222222222222222222222222222222222222222222222222222222222222222
```

```
left -----  
chrom ATGGCAATTGTAGCTTTCCTGGCTTATTATTTCTGCAGCCATTTTCTAGGCATTATTACCGAAAATTCAA  
right ATGGCAATTGTAGCTTTCCTGGCTTATTATTTCTGCAGCC-----  
22222222222222222222222222222222222222222222222222222222222222222222
```

```
left -----  
chrom CTTAGAACCTGCGCCTTCGGCCTTT  
right -----
```

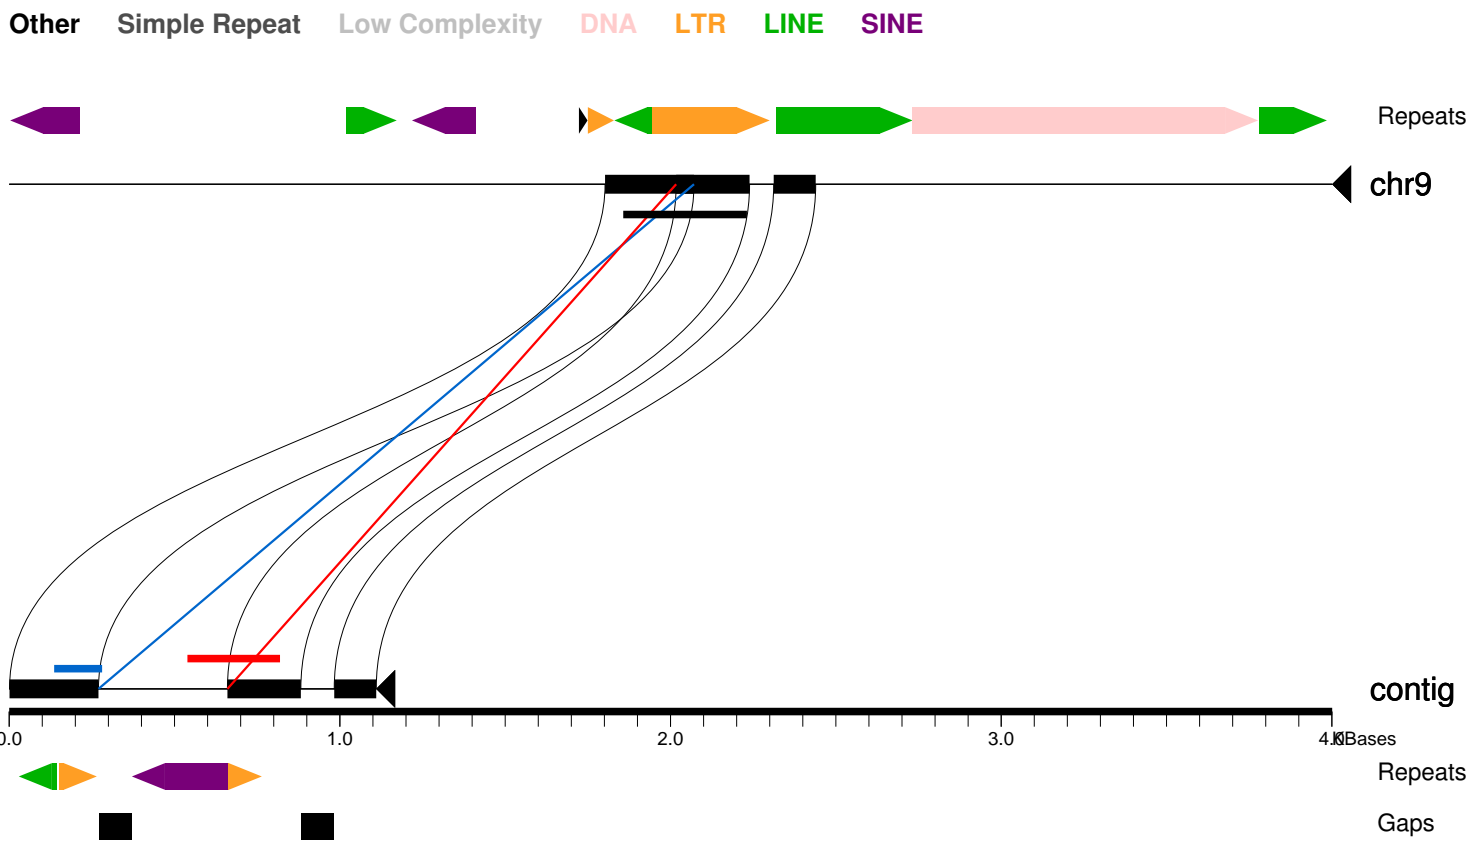









siteID: chr9\_22288723 Scaffoldig3 + Breakpoint: chr9:22288708

chr9:22288665-22288767

Overlap Length: 17 INS size: 314 Genotyped: Yes

```
left  ATGAGATGGTGTGC-----AAGATTTGATCTTC-----CCCCACCACAGATTGCCTGTGTTC
chrom ATGAGATGGTGTGC-----AAGATTTGATCTTC-----CCCCACCACAGATTGCCTGTGTTC
right CCGCCCGCCTCGGCCTCCCAAAGTGCTGGGATTACAGGCGTGAGCCACCGCGCCCGGCCGCCTGTGTTC
      11*111111*11**111111***111**111**11111111111**1**1*11*1*111*****

left  CTTTC TTTTTTTTTTTTTTTTTTTTTTTTTTTTTTTTTTTTGGAGACGGAGTCTCGCTCTGTGCGCCA
chrom CTTTC TACTCAAATGTCAGTGAATGCTTTCAACTGTTTTCTAAGGGAAC-----
right CTTTC TACTCAAATGTCAGTGAATGCTTTCAACTGTTTTCTAAGGGAAC-----
      *****22*2222*2*222*22*22***2222*2*****222*2***2222222222222222
```

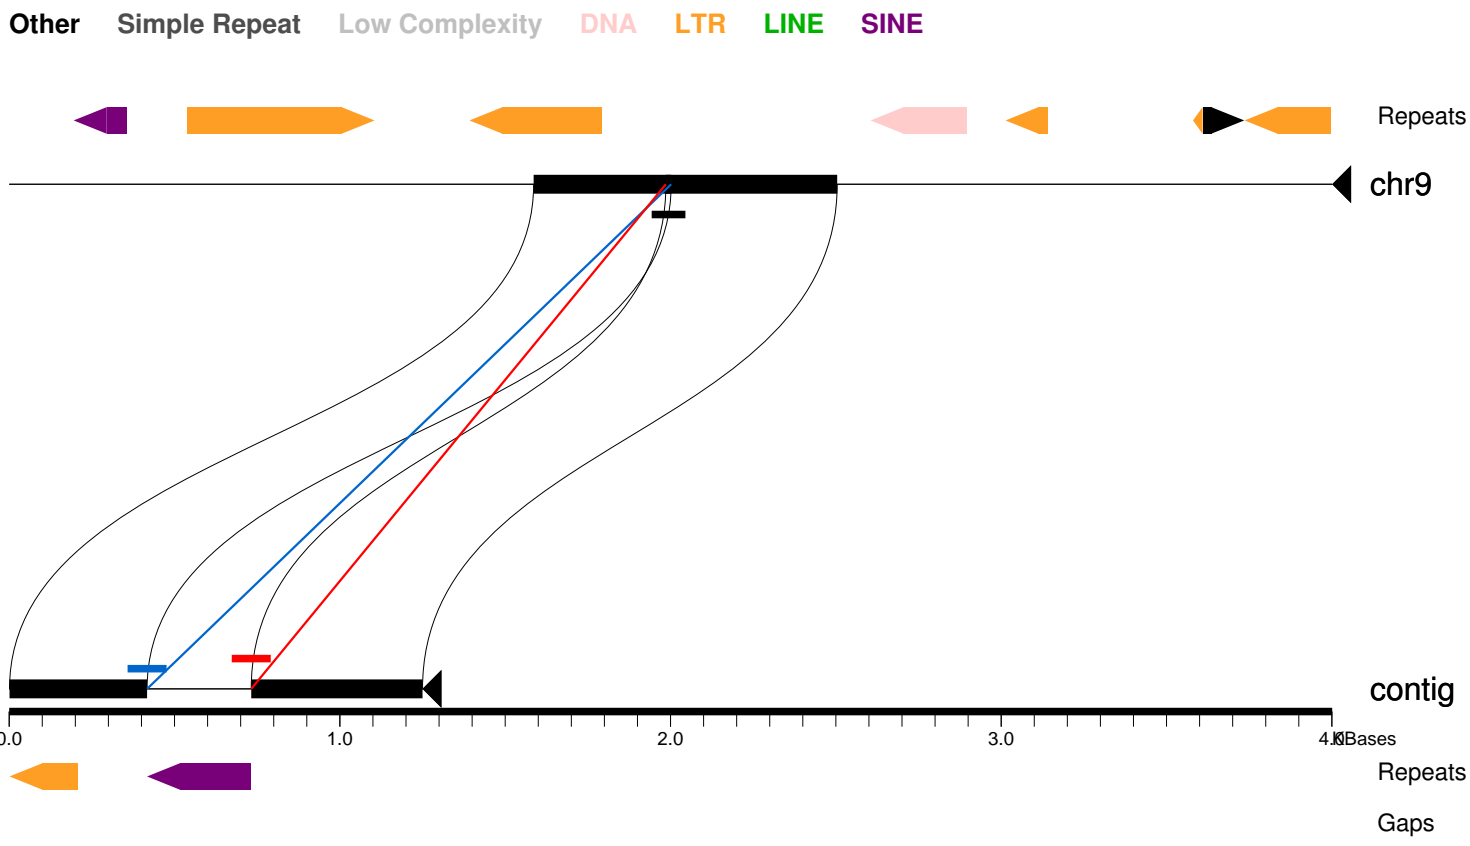

siteID: chr9\_2351279 Scafftig4 - Breakpoint: chr9:2351288

chr9:2351244-2351347

Overlap Length: 16 INS size: 299 Genotyped: Yes

```
left -ATAGTATTTTTTTCCTTTC--TCTTTTCTA-ACTCTTT-TCATAACTCT-----AAGAATTATGA
chrom -ATAGTATTTTTTTCCTTTC--TCTTTTCTA-ACTCTTT-TCATAACTCT-----AAGAATTATGA
right CACTGCACTCCAGCCTGGGCGACAGAGCGAGACTCCGTCTCAAAAAAAAAAAAAAAAAAAAAAAGAATTATGA
1*11*1*1*1111***111111*1111*1*1****11*1***1**11111111111111111******
```

```
left TTTC TGGCCGGGCGCGGTGGCTCACGCCTGTAA-TCCCAGCACTTTGGGAGGCCGAGGCGGGCGG
chrom TTTC TTTCTCTTCCCAATTTTGTTGGCTATGACTTCTAGTACAT-----GTCA
right TTTC TTTCTCTTCCCAATTTTGTTGGCTATGACTTCTAGTACAT-----GTCA
**** *22*2222*2*222222*222*2**2*2*2*2*2**2**2*2222222222222222*222
```

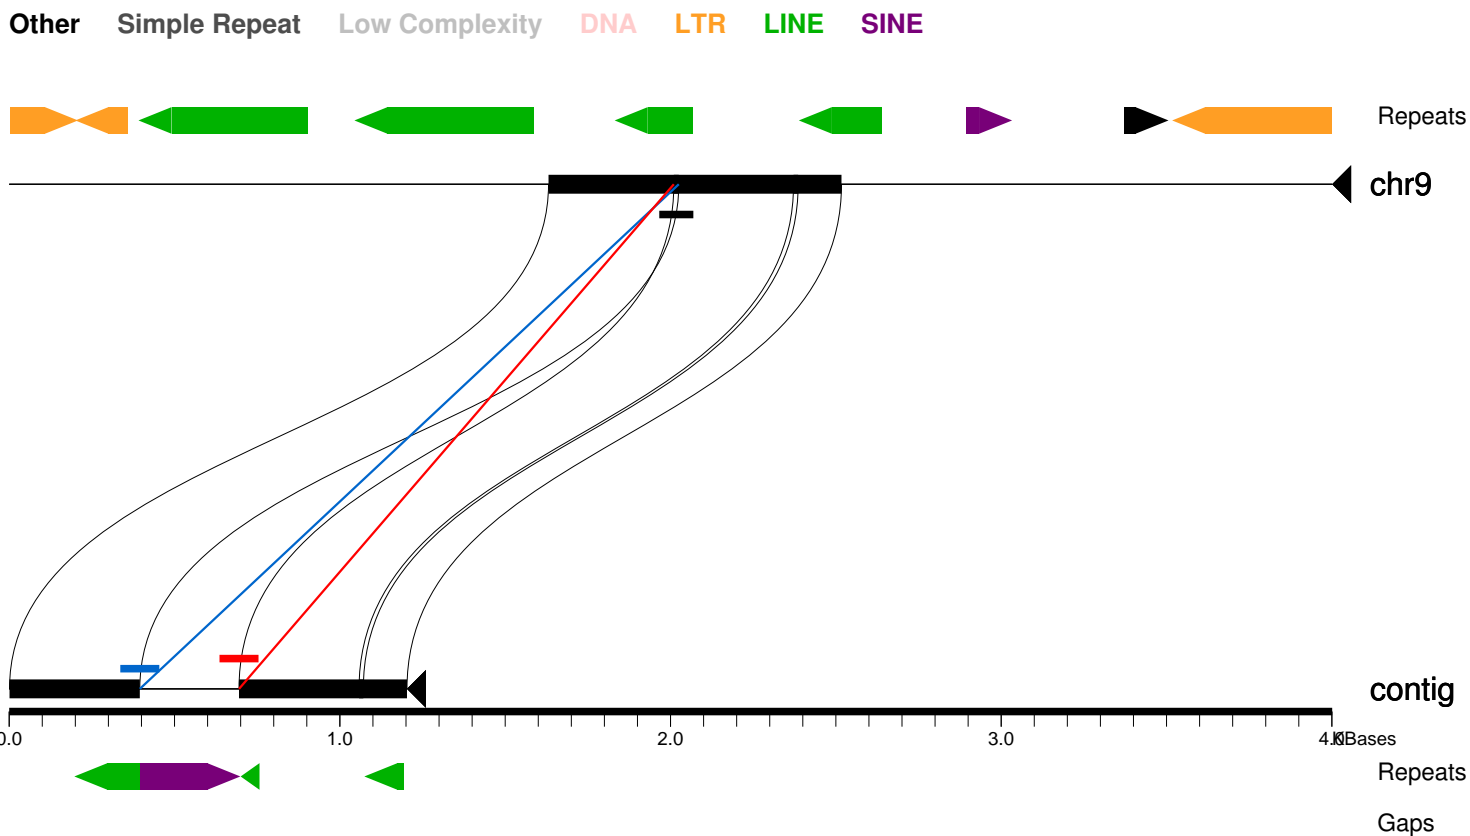

siteID: chr9\_25600975 Scaffitig1 - Breakpoint: chr9:25600953

chr9:25600909-25601012

Overlap Length: 16 INS size: 161 Genotyped: Yes

```
left      TTTTATTT--TTCAC TTTTGTCTATAAATGTATGC--TTTTCCTAA-----TTGAAGAGAAC
chrom    TTTTATTT--TTCAC TTTTGTCTATAAATGTATGC--TTTTCCTAA-----TTGAAGAGAAC
right    CTCGGCTCACTGCAAGCTCCGCCTCCCGGGTTCACGCCATTCTCCTGCCTCAGCCTCCC TTGAAGAGAAC
1*11111*1111*1**111*11*11**11111*11*1**11**1****11111111111111*****
```

```
left      TTTC TTTTTTTTTTTTTTTTTTTTTTTTTTTTTTTTTTTTTTTTTTTTTTTTTTTTTTTTGAGAC
chrom    TTTC TGAGACTACATCTAATTTATAGATGTGTTC-----TCCTCTCTCCCAACA
right    TTTC TGAGACTACATCTAATTTATAGATGTGTTC-----TCCTCTCTCCCAACA
**** *22222*222*2*22***2*222*2*2**222222222222222222*22*2*2*222*222
```

Other Simple Repeat Low Complexity DNA LTR LINE SINE

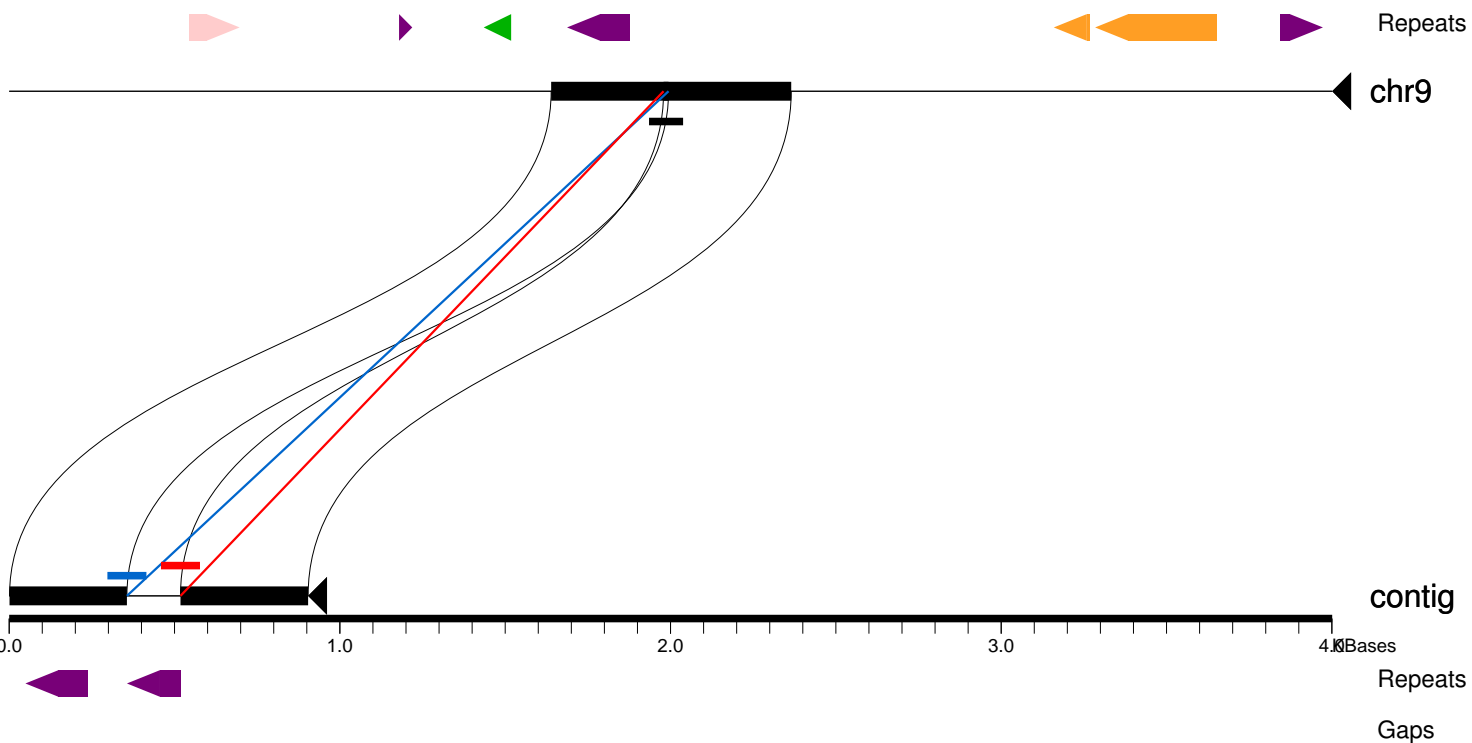

siteID: chr9\_26476445 Scafftig1 + Breakpoint: chr9:26476356  
 chr9:26476314-26476415  
 Overlap Length: 18 INS size: 104 Genotyped: Yes

```

left  AAGAGTAA-----TGGGAATA---AATTAGGAAGAAAAATTTAGGCTGAA-----TATAAGGAACA
chrom AAGAGTAA-----TGGGAATA---AATTAGGAAGAAAAATTTAGGCTGAA-----TATAAGGAACA
right CTCTGTCGCCCCAGGCGGGACTGCGGACTGCAGTGGCGCAATCTCGGCTCACTGCAAGCTTATAAGGAACA
      1111**1111111111****1*1111*1*111*11*111***1*1****1*1111111111*****
left  TTTTCTTTTTTTTTTTTTTTTTTTTTTTTTTTTTTTTTTTGAGACGGAGTCTCGCTCTGTGCCCCAGG
chrom TTTTCTTAATCATTAATCAATTAGACAATGGAATTTA-AAATTGGGTAT-----
right TTTTCTTAATCATTAATCAATTAGACAATGGAATTTA-AAATTGGGTAT-----
      *****22*22**222*222**222222*2222***22*2*22*2**2*2222222222222222
  
```

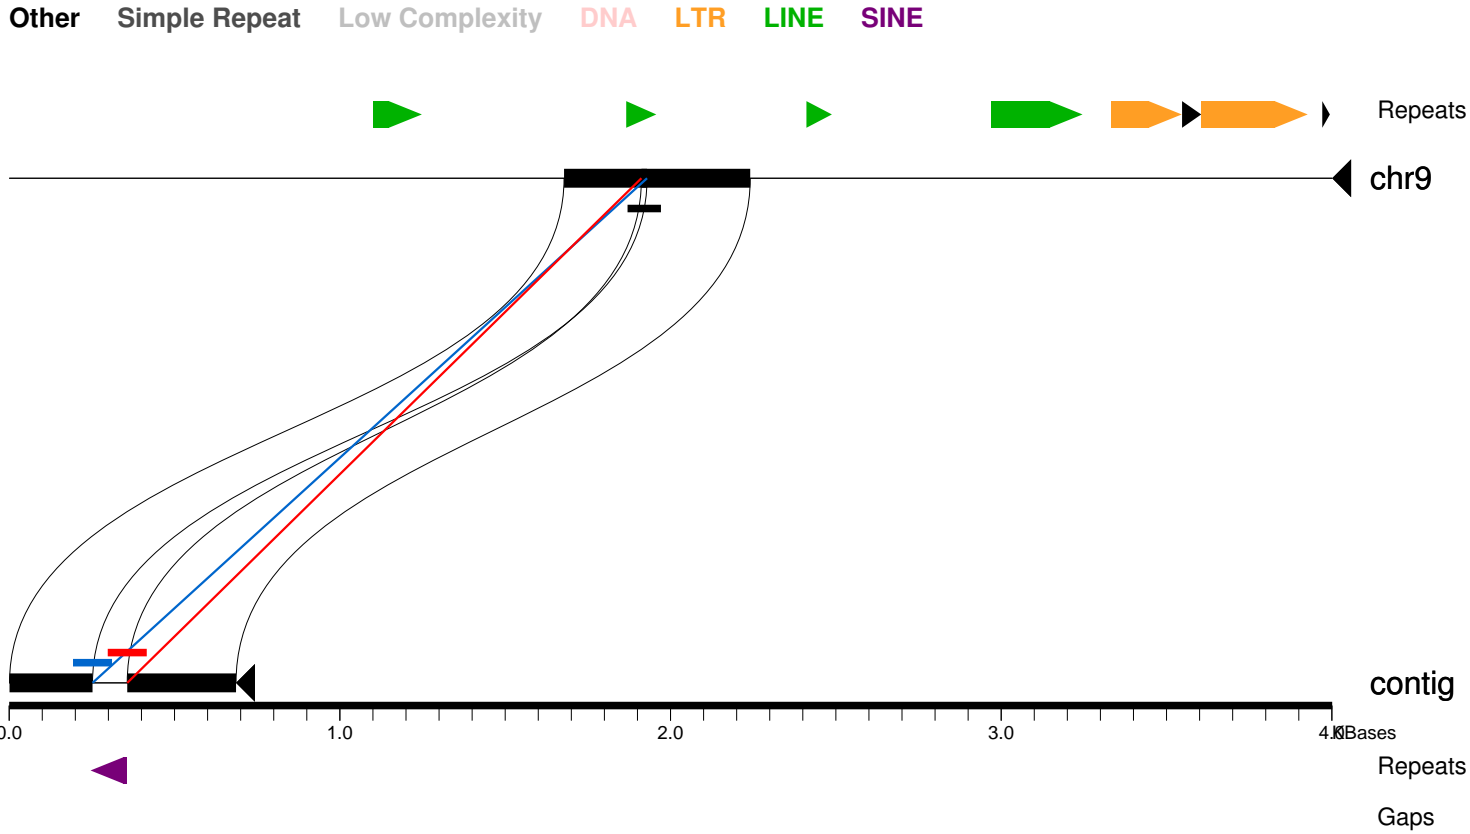





siteID: chr9\_30734685 Scaffitig3 - Breakpoint: chr9:30734676

chr9:30734625-30734735

Overlap Length: 9 INS size: 300 Genotyped: Yes

```
left  ATGGTATAC-----TTAACAACTGACCT---CATAAACTCTAACTTTAAAAAACTTGTATAAACATGTTGG
chrom ATGGTATAC-----TTAACAACTGACCT---CATAAACTCTAACTTTAAAAAACTTGTATAAACATGTT--
right ACTGCACTCCAGCCTGGGCGACAGAGCGAGACTCCGTCTCAAAAAAAAAAAAAAAAAAAAAAAACATGTT--
      *11*1*11*11111*111*1**1**1*1111*11111***1**1111*****11111*1*****22

left  CCGGGCGCGGTGGCTCACGCCTGTAATCCAGCACTTTGGGAGGCCGAGGCGGGCGG
chrom ACAGACCAGTTTTATTATGTTCTCAA--CATGTACTTT--GAAGCTAATAAAAACT--
right ACAGACCAGTTTTATTATGTTCTCAA--CATGTACTTT--GAAGCTAATAAAAACT--
      2*2*2*22*2*222*2*2*2222**22*22*2*****22*2**22*22222222
```

Other Simple Repeat Low Complexity DNA LTR LINE SINE

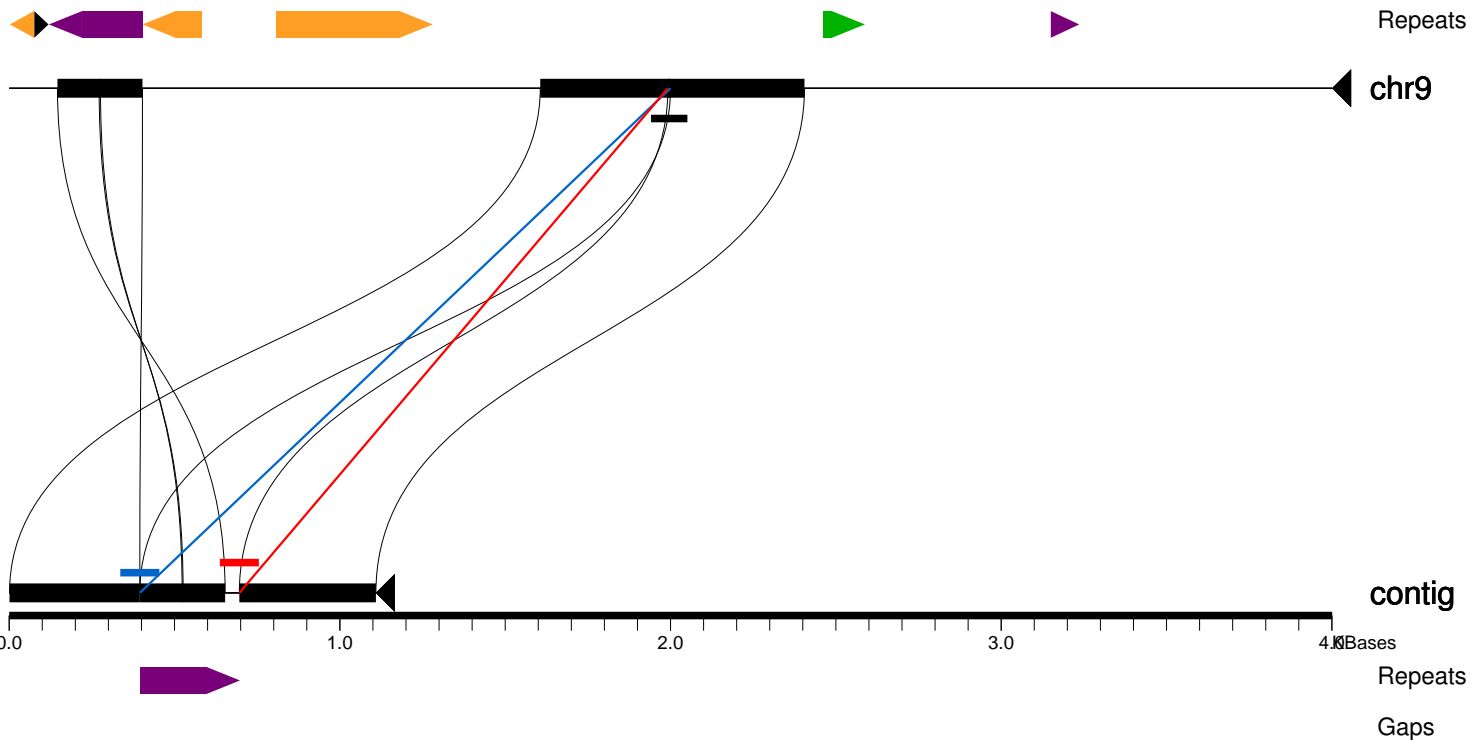



siteID: chr9\_33700126 Scaffitig1 + Breakpoint: chr9:33700119

chr9:33700075-33700178

Overlap Length: 16 INS size: 301 Genotyped: Yes

```
left  TAAT---GTCAAGTTCACACTAGAGTCTACGAT----GGTGT----CAAAGAGCT----CTATATTTTTC
chrom TAAT---GTCAAGTTCACACTAGAGTCTACGAT----GGTGT----CAAAGAGCT----CTATATTTTTC
right TCCACCCGCCTCGGCCTCCCAAAGTGCTGGGATTACAGGCGTGAGCCACCGCGCCCGGCCTATATTTTTC
      *111111*1*11*11*1*1*1*1111**11***1111**1**1111**11*1**11111*****
```

```
left  TTCTTCTTTTTTTTTTTTTTTGAGACGGAGTCTCGCTCTGTTGCCAGGCCGGACTGCGGACTGCA
chrom TTCTT GAGTCACTTTGAT-----ATCCTCCCACAGTA----AGACC--ATTACAGT-TGGT
right TTCTT GAGTCACTTTGAT-----ATCCTCCCACAGTA----AGACC--ATTACAGT-TGGT
      ****222*222***22*22222222*22***2*2*2**22222**2**22*2*2*22**22
```

Other Simple Repeat Low Complexity DNA LTR LINE SINE

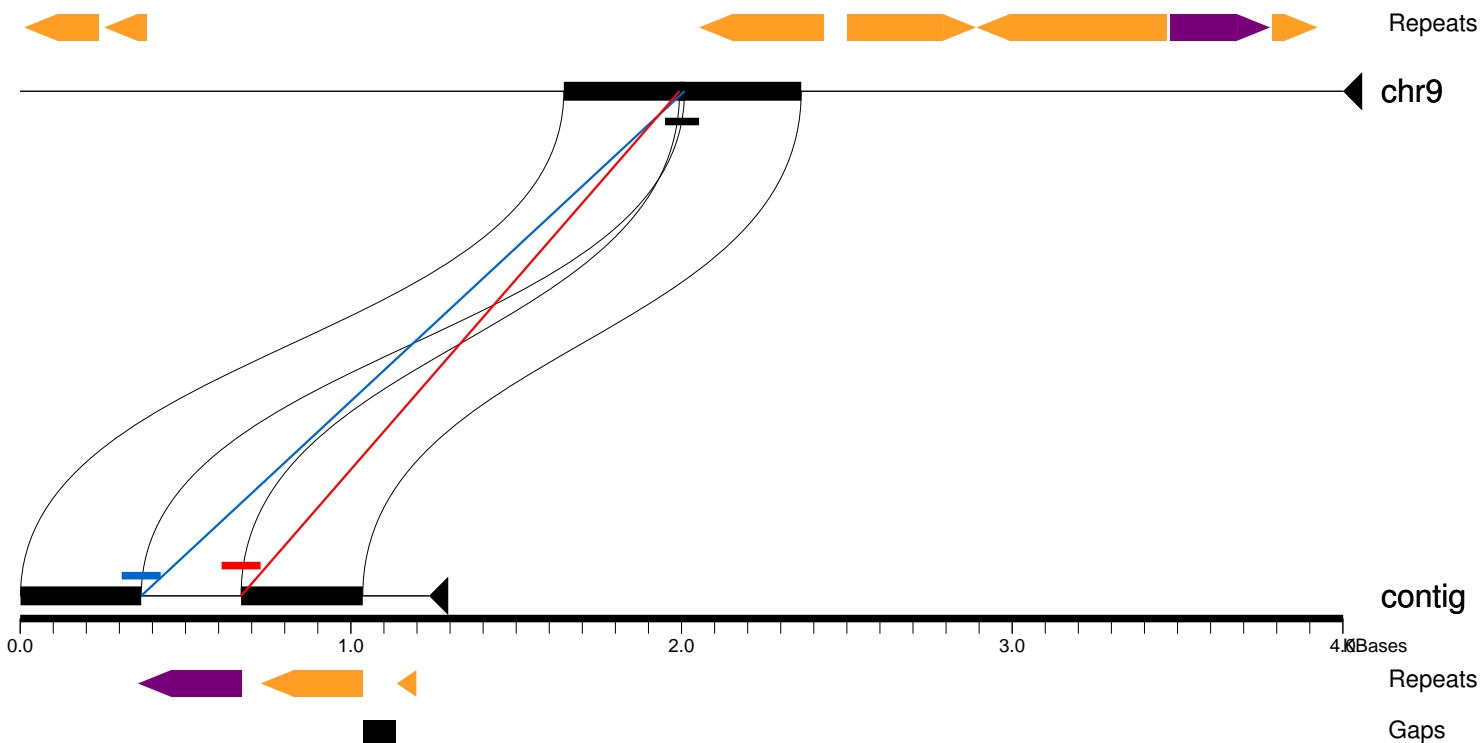

siteID: chr9\_37596340 Scaffitg4 + Breakpoint: chr9:37596332

chr9:37596172-37596508

Overlap Length: 17 INS size: 311 Genotyped: Yes

```
left      T-----ATGTGCCAATGACAGTGGGTTTAGGTGAGGC-AAATTGAGAAAATATGCTT
chrom     TTGGCATGTAGGTGGTGGTATTGTCCAATGACAGTGGGTTTAGGTGAGGC-AAATTGAGAAAATATGCTT
right     G-----AGAATGGCGTGAACCCAGGGGGCGGAGCCTGCAGTGAGCCGAGATTGCGCCACTGCACTC
1         22NNN2NN2211111***11*111*11*11*111*****1*1*1****1*11*1*111**1
```

```
left      CAGGAAGTCAACATTGGATGGAGCTATTTTCATATCTTGGACCCCTCATTCTTCTCAATGATGGGATGAT
chrom     CAGGAAGTCAACATTGGATGGAGCTATTTTCATATCTTGGACCCCTCATTCTTCTCAATGATGGGATGAT
right     CAG-----CCTGGGCGACAGCGA-----GACTCCG---TCTCAAAAAAAAAAAAAAAAAAAAA
***111111111*1*1**1111***1*1111111111111***1**1111***11111***11*1111*11*1
```

```
left      TAGAGGTTGGGTCTAATCTTTAAAGTTGCCACATTTT-----AGGCCGGG---CGCAGTGGCTCACGCC
chrom     TAGAGGTTGGGTCTAATCTTTAAAGTTGCCACATTTTCTAAAAATGCTGTAATTTCTGTGTTTCATCTTTCC
right     AAAAA-----AAAAAAAAAAGTTGCCACATTTCTAAAAATGCTGTAATTTCTGTGTTTCATCTTTCC
1*1*111111111111**111111******22222*2*2*22222*222**222**222**222**
```

```
left      TGTAATCCCAGCA---CTTTGGG---AGGCCGAGCGGGCGGAT-CAC-GAGGTC-----AGG--
chrom     TGTTCCTTCTACATAACCTTGAACATAAAAGCTAAGAGCAAAGGATTCACTGTGATTTGCCGTGGAAGGCA
right     TGTTCCTTCCAACATAACCTTGAACATAAAAGCTAAGAGCAAAGGATTCACTGTGATTTGCCGTGGAAGGCA
***22*2**N2**222*2***222222*2**22**222222****2***2*2*2*2222222222***22
```

```
left      -AGATCGAGACCATCTTGGC-----TAACACGGTGAAACCTGTCTCTACT---AAA
chrom     AAAATAAAAAAGTATGCGCGCATAATTTAATATTTGATATTTGTATTATTTAGTCTGATC
right     AAAATAAAAAAGTATGCGCGCATAATTTAATATTTGATATTTG-----
2*2**22*2*22**2*22**222222***2*22*22*22222NNN1N1N1N1N1 1NN
```

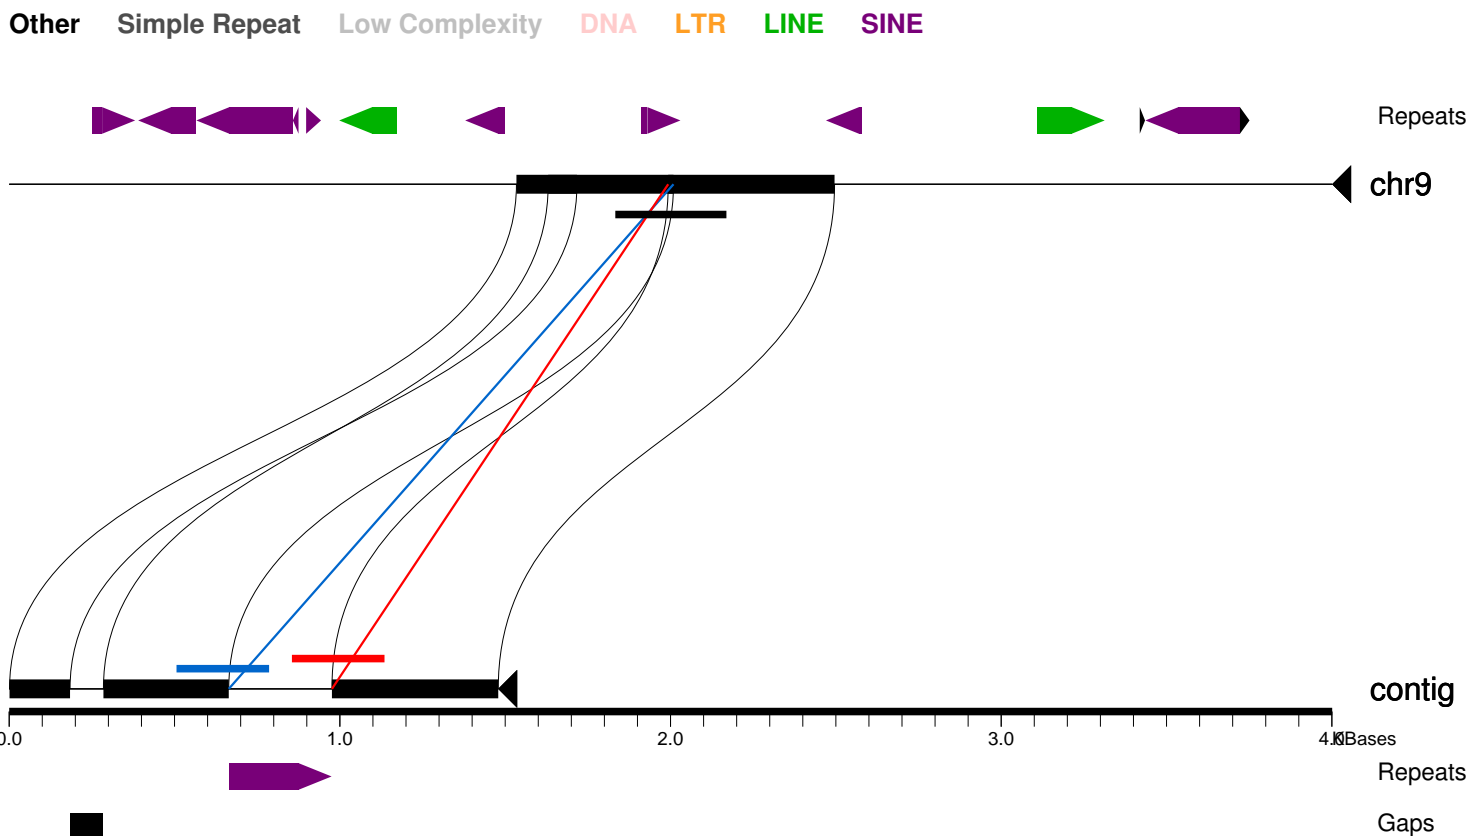

siteID: chr9\_38767754 Scaffitig6 + Breakpoint: chr9:38767761

chr9:38767601-38767934

Overlap Length: 14 INS size: 300 Genotyped: Yes

```
left -----CCCTCTGTGCTTTCAGTGCTCCCTTGATTTCCTGACATAACAAGGTAAGTGTTCAC
chrom TTGCTCTGGCGCAGCCCTCTTGTGCTTTCAGTGCTCCCTTGATTTCCTGACATAACAAGGTAAGTGTTCAC
right -----GCAG-----GAGAATGGCGTGAACCCAGGGGGCGGAGCCTGCA-----GTGAGC
                222211111111*1*11*111***11***11*1111*1**11111**11111111**1111*
```

```
left CGACTACTTCTATTGCCAGACCCGGAATTAACCATTTCTCAAGGACTGGCATTATTATTATTAATGCG
chrom CGACTACTTCTATTGCCAGACCCGGAATTAACCATTTCTCAAGGACTGGCATTATTATTATTAATGCG
right CGAG-----ATTGCGC---CACTGCACT--CCAG--CCTGGGCGACAGCGAGACTCCGTCTCAA-----
                ***111111111**1111*1*1*1*1*11***111**1111***1*11*111*111*1*1**1111
```

```
left GTATAACTTACACAGAGTATAAGAAAGTACACTAGGC---CGGGCGCGGTGG-----CT----CACGCC
chrom GTATAACTTACACAGAGTATAAGAAAGTACACTAATCTTACATGTACAATTCATGAACCTTTTACATACT
right --AAAAAAAAAAAAAAAAAAAAAAGAAAGTACACTAATCTTACATGTACAATTCATGAACCTTTTACATACT
                11*1**111*1*1*1*11*1*1*****1*22*222*22*22*22*22222222**2222**22*2
```

```
left TGTA----ATCCAGCACTT-TGGGAGGCCGAGG-----CGGGCAGATCACGAGGTC---AGGAG
chrom TATACAGCATAACAACCACTTCTCATATAAAGATATACAACATTTCTAGCACCTAGAAAAGTTCCCCAGGGG
right TCTACAGCATAACAACCACTTCTCATATAAAGATATACAACATTTCTAGCACCTAGAAAAGTTCCCCAGGGG
                *N**2222**2*2*2*****2*222*2222**222222222222*22***22*2222**2**222***2*
```

```
left -----ATCGAGACCATCCTGGCTAACACGGTGAAACCCCGTCTCTACTAAA
chrom CCCATTGCATGTATTACCTCCTCCCCATGCTGTATGCAGTGGTAATTACAATA
right CCCATTGCATGTATTACCTCCTCCCCATGCTGTATGCAGTGGTAA-----
                22222222**22*222*2***22*22*22*2**22222222**22N111N1N1
```

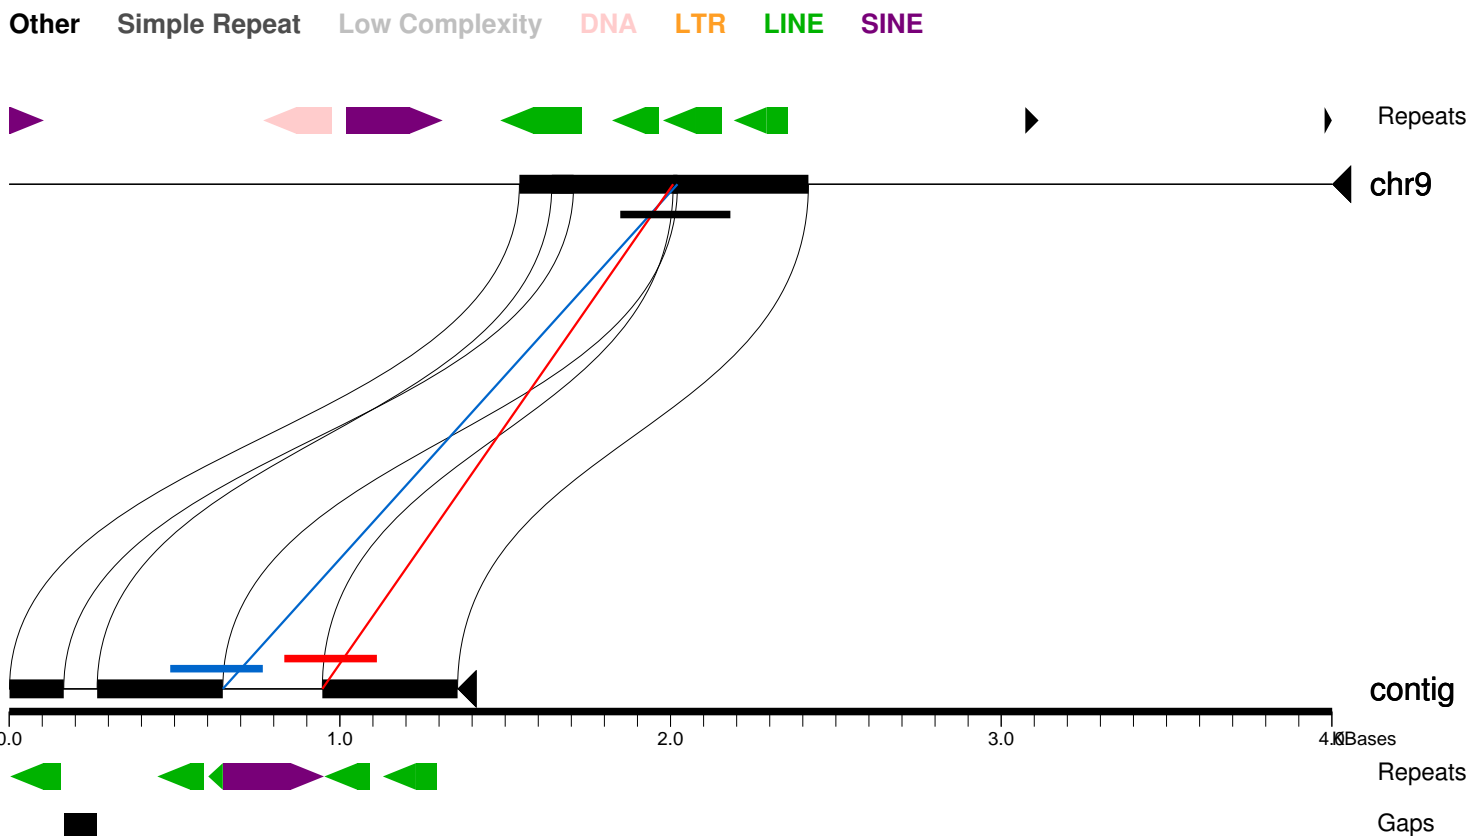

siteID: chr9\_4237120 Scaffitg3 + Breakpoint: chr9:4237130

chr9:4237082-4237189

Overlap Length: 12 INS size: 281 Genotyped: Yes

```
left  AAGTA-TAAAGAATCACCAACATGTTCACT-TCCTTCACTGATT-----TATTTCAAAAAATAATCC
chrom AAGTA-TAAAGAATCACCAACATGTTCACT-TCCTTCACTGATT-----TATTTCAAAAAATAATCC
right CTGCACTCCAGCCTGGGCGACAGAGCGAGACTCTGTCTCAAAAAAAAAAAAAAAAAATAAAATAAAAATAATCC
      11*1*1*11*11*111*1***11111*111*11*1*11*11111111111*11111*****
```

```
left  T--GCCTGTAATCCCAGCACTTTGGGAGGCCGAGGCCGGCGGATCACGAGGTCAGGAGATC-G
chrom TAAGGAAATAATCCAAA-ACAAGGGAAAACTGT-----ATTATGT-ATTATAGCAG
right TAAGGAAATAATCCAAA-ACAAGGGAAAACTGT-----ATTATGT-ATTATAGCAG
      *22*2222*****2*22**222**2*22*2*222222222222*22*2**2*22*2*2*2*
```

Other Simple Repeat Low Complexity DNA LTR LINE SINE

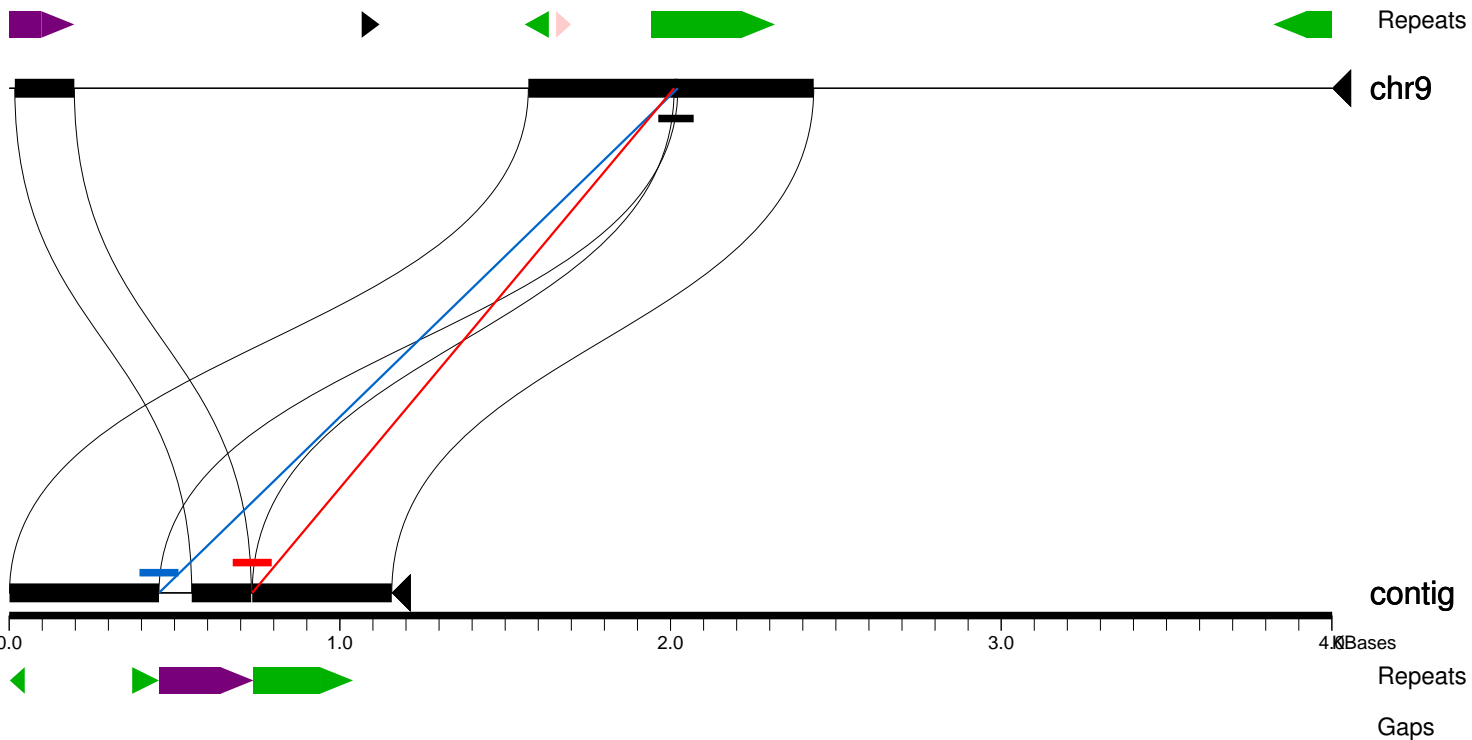







siteID: chr9\_75231549 Scaffoldig1 - Breakpoint: chr9:75231534

chr9:75231487-75231590

Overlap Length: 13 INS size: 303 Genotyped: Yes

```
left  GGTGTGTAGT-----ACTGAGCAGTATATCTTTT-----ATTGTTGAAGTCCAATAAGAACAG
chrom GGTGTGTAGT-----ACTGAGCAGTATATCTTTT-----ATTGTTGAAGTCCAATAAGAACAG
right CTGCACTCCAGCCTGGGCGACAGAGCGAGACTCCGTCTCAAAAAAAAAAAAAAAAAAAAAAAAAAAGAACAG
      1111111111**1111111111**1***111*111*1*1*111111111*1111111**1111**1*****
```

```
left  AGCAGGCCGGGCGTGGTGGCTCACGCCTGTAATCCCAGCACTTTGGGAGGCCGAGGCGGGCGGA
chrom AGCAGATA-----TCAACCTAATTTGTAAGTGATGCATTTT-----CCTAAACTAAATG-
right AGCAGATA-----TCAACCTAATTTGTAAGTGATGCATTTT-----CCTAAACTAAATG-
      ***2222222222*2222*2222*****2222***2***222222**2*22*22222*2
```

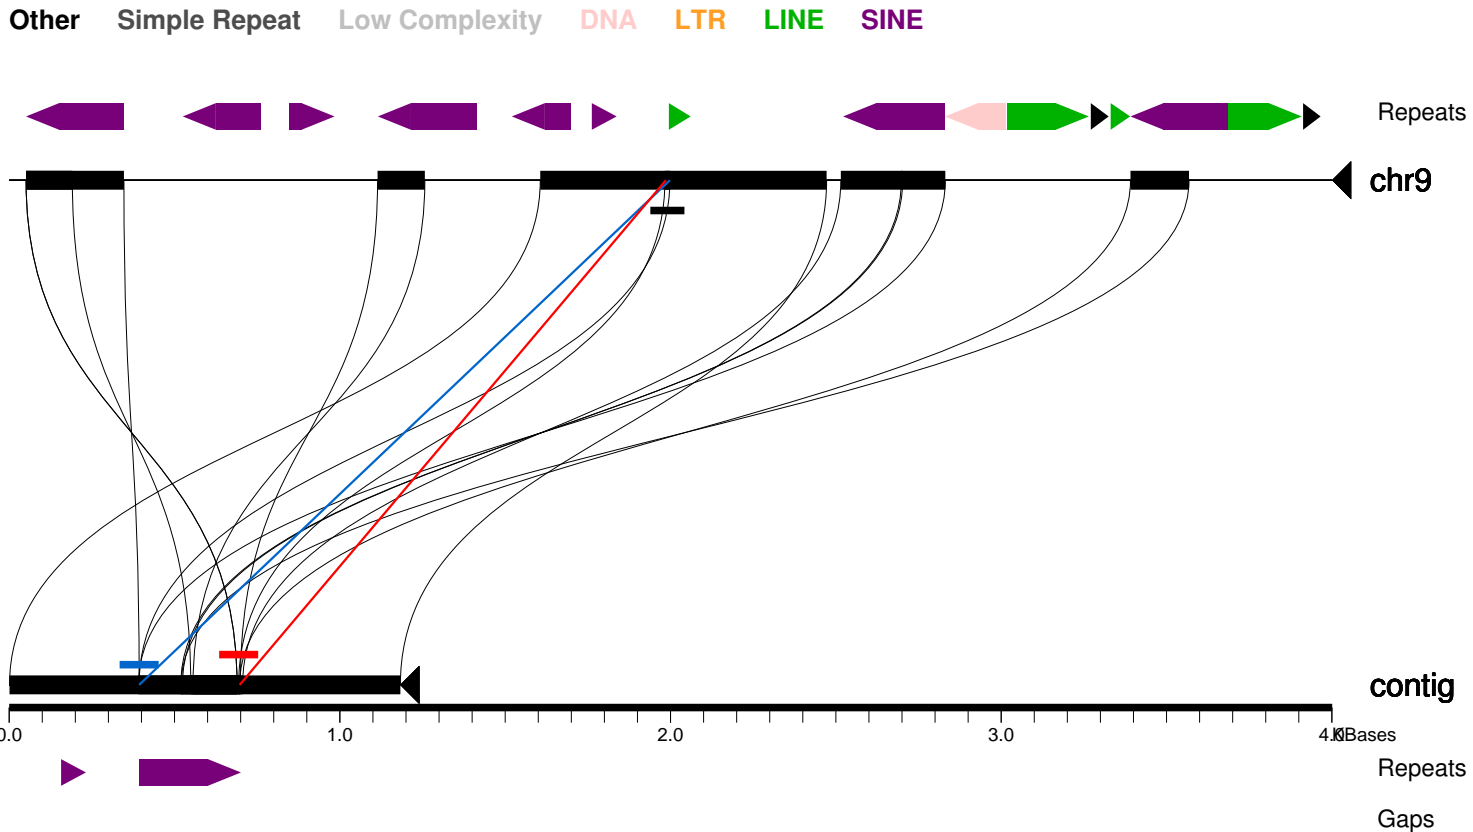

siteID: chr9\_75542977 Scaffitg2 - Breakpoint: chr9:75542970

chr9:75542926-75543029

Overlap Length: 16 INS size: 333 Genotyped: Yes

```
left AA-GTGACT---TCTCCCATTTTGTCCCGGAGTAAAGTAGGACAGTTC-----TAAAGTAGCCA
chrom AA-GTGACT---TCTCCCATTTTGTCCCGGAGTAAAGTAGGACAGTTC-----TAAAGTAGCCA
right AGCGAGACTCCGTCTCAAAAAAAAAACAAAAAAAAAAAAAAAAAAAAAAAAAAAAAAAAAATAAAGTAGCCA
*11*1****111****11*1111111*111*11****11*11*1*1111111111111111*****
```

  

```
left CATTGTGGCCGGGCGCGGTGG-CTCACGCCTGTAATCCCAGCACTTTGGGAGGCCGAGGCGGGTG
chrom CATTCTTAGTACCACCGAGGTCTTAC---TCTCCTCTCA--ACTTTCTG----CTAT-----
right CATTCTTAGTACCACCGAGGTCTTAC---TCTCCTCTCA--ACTTTCTG----CTAT-----
****22222222*2*2*2**2**2**222*2*22**2**22*****22*2222*2*22222222
```

Other Simple Repeat Low Complexity DNA LTR LINE SINE

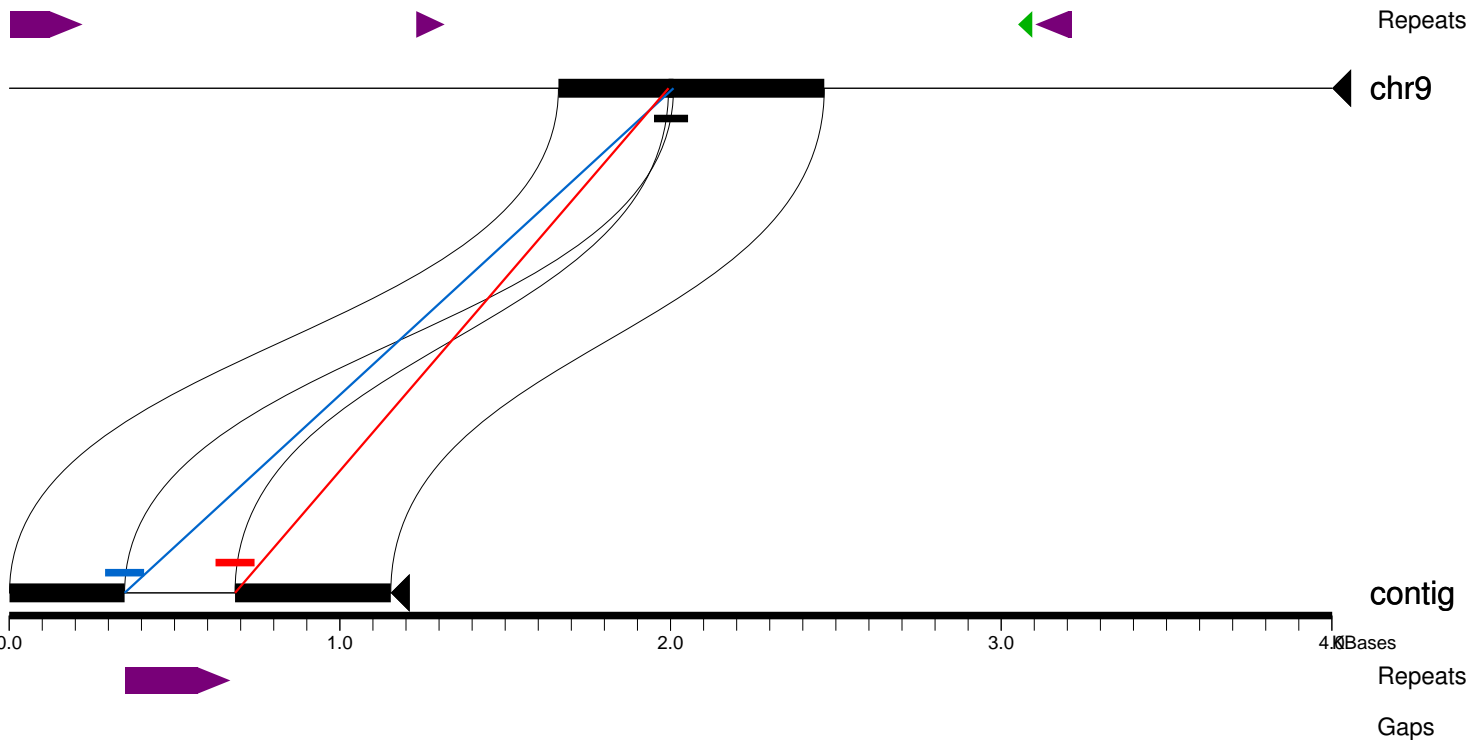



siteID: chr9\_76197797 Scafftig4 + Breakpoint: chr9:76197791

chr9:76197745-76197850

Overlap Length: 10 INS size: 311 Genotyped: Yes

```
left  AGA-----ATCTCAAAACTATGTGAGTTCATTTTTTTT--ATTGATTTTCAGTGAGCAGTTATC
chrom AGA-----ATCTCAAAACTATGTGAGTTCATTTTTTTT--ATTGATTTTCAGTGAGCAGTTATC
right CCACCCGCCTCGGCCTCCCAAAGTGCTGGGATTACAGGCGTGAGCCACCGCGCCCGGCCGAGCAGTTATT
      11*1111111111111111**1****1111**1**1*1**1111*111111*11*1111111111******2
```

```
left  CTTTTTTTTTTTTTTTTTTTTTTTTTTTGGAGACGGAGTCTCGCTCTGTCGCCAGGCCGACTGCGGA
chrom CTTAACAGAA-----GATTTCAAACCTAACCATTACT-TATCCCTTAAGTCAAGTT-----
right CTTAACAGAA-----GATTTCAAACCTAACCATTACT-TATCCCTTAAGTCAAGTT-----
      ***22222222222222222222***2*2**22*222*22**2*2**2*22*2*2*2222*22222
```

Other Simple Repeat Low Complexity DNA LTR LINE SINE

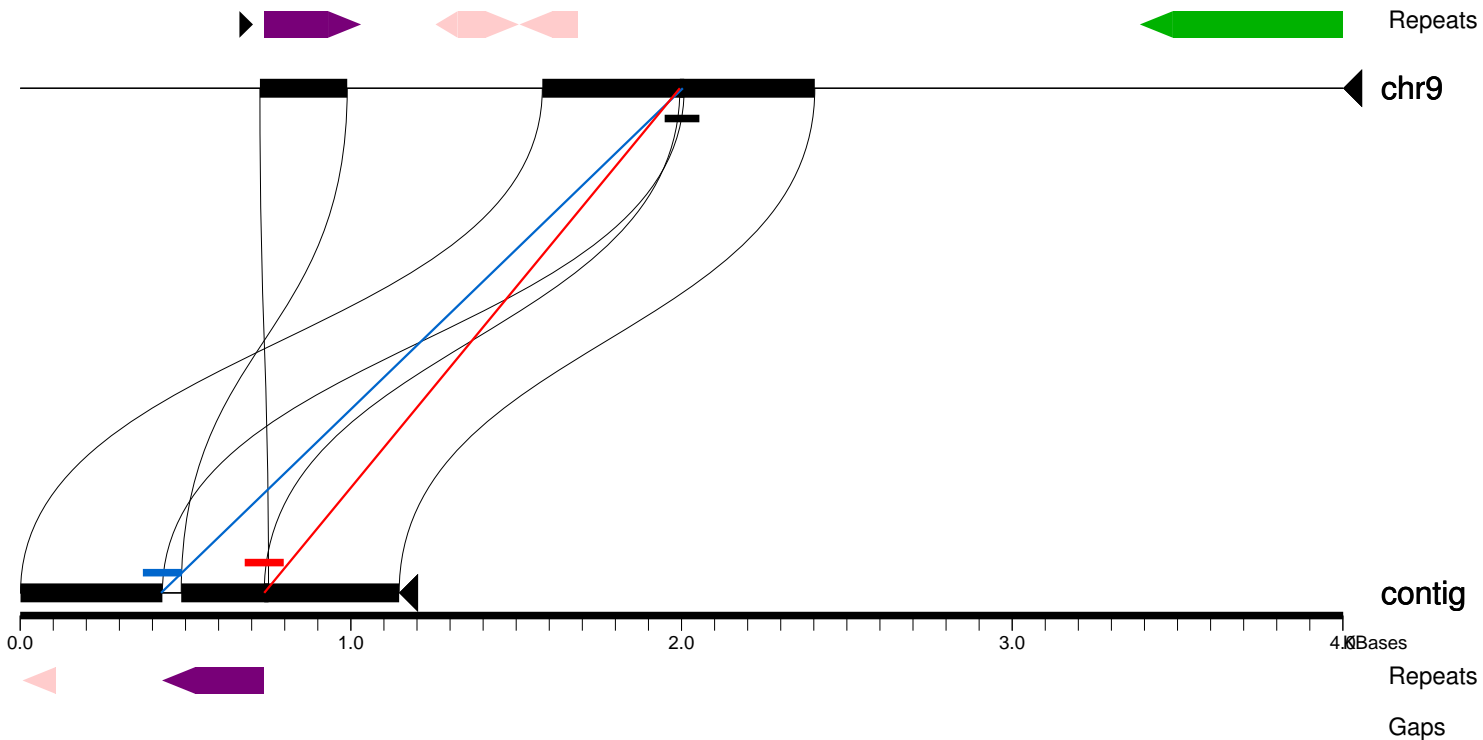







siteID: chr9\_79583153 Scaffitig3 - Breakpoint: chr9:79583156

chr9:79583113-79583215

Overlap Length: 17 INS size: 298 Genotyped: Yes

```
left    GCCGGTCCCTCCTGCCAATCCAAAATG--GACATGTAGTGTGAGG-----AAAAAAAAAAG
chrom   GCCGGTCCCTCCTGCCAATCCAAAATG--GACATGTAGTGTGAGG-----AAAAAAAAAAG
right   CCACTGC ACTCCAGCCTGGGCGACAGAGCGAGACTCCGTCTCAAAAAAAAAAAAAAAAAAAAAAAAAAAAAAG
        1*1111*1****1***1111*1*1*1111**1*1111**1*1*11111111111111111******
```

```
left    CTTTGAAGGCCGGGCGCGGTGGCTCACGCCTGTAATCCCAGCACTTTGGGAGGCCGAGGCGGGCGG
chrom   CTTTGAATGTTT-----TATTCCAAGGAGATCATACG-GCTATTTG---TTCCTACA----GC
right   CTTTGAATGTTT-----TATTCCAAGGAGATCATACG-GCTATTTG---TTCCTACA----GC
        *****2*2222222222*2222**2*2222*2**2*22**22*****22222*2*2222222*2
```

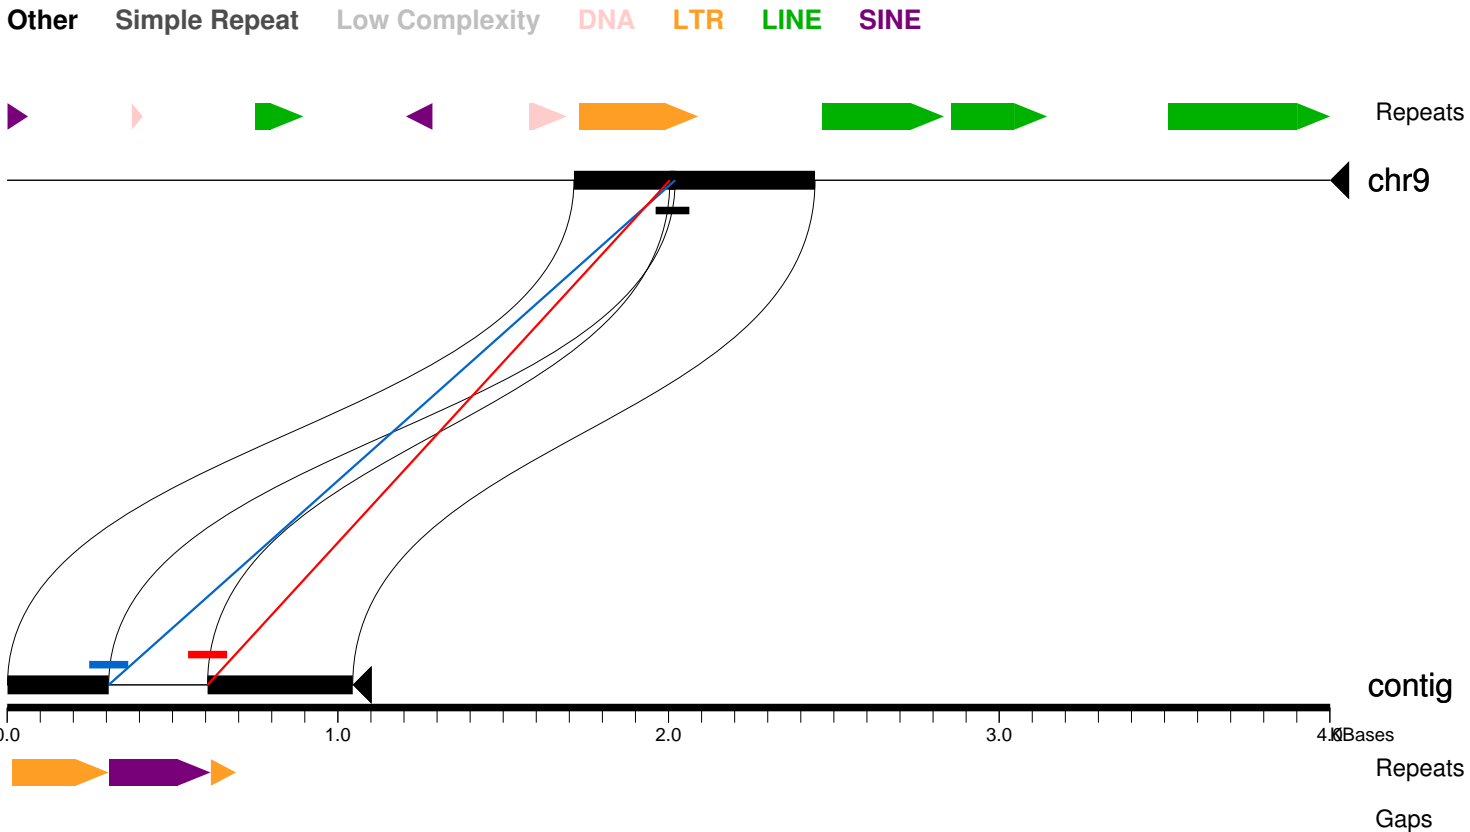



siteID: chr9\_8008995 Scaffitg1 + Breakpoint: chr9:80089945

chr9:80089899-80090004

Overlap Length: 2 INS size: 306 Genotyped: Yes

```
left TAG---GACTGGG-----AGGTCATGGAAATAGGAGCATGATG----GCTTAATGGGTCCCTTTTTTTT
chrom TAG---GACTGGG-----AGGTCATGGAAATAGGAGCATGATG----GCTTAATGGGTCCAGTGTTC
right CCGCCTGCCTCGGCCTCCCAAAGTGTCTGGGATTACAGGCGTGAGCCACCGCGCCC-GGCCCCAGTGTTC
      11*111*1**1**1111111*1**11***1*1**111*1***111111**11111**11*22*2***2

left TTTTTTTTTTTTTTTTTGAGACGGAGTCTCGCTCTGTCGCCAGGCTGGAGTGCAGTGGTGGGA
chrom TTTTATGG-----GGGACATAAAAT---TTTGTGATCCACACCCAAGTTGGCTGGCAG--
right TTTTATGG-----GGGACATAAAAT---TTTGTGATCCACACCCAAGTTGGCTGGCAG--
      ***2*2222222222*2***22*222*222*2***222***22*222***2222***22*22
```

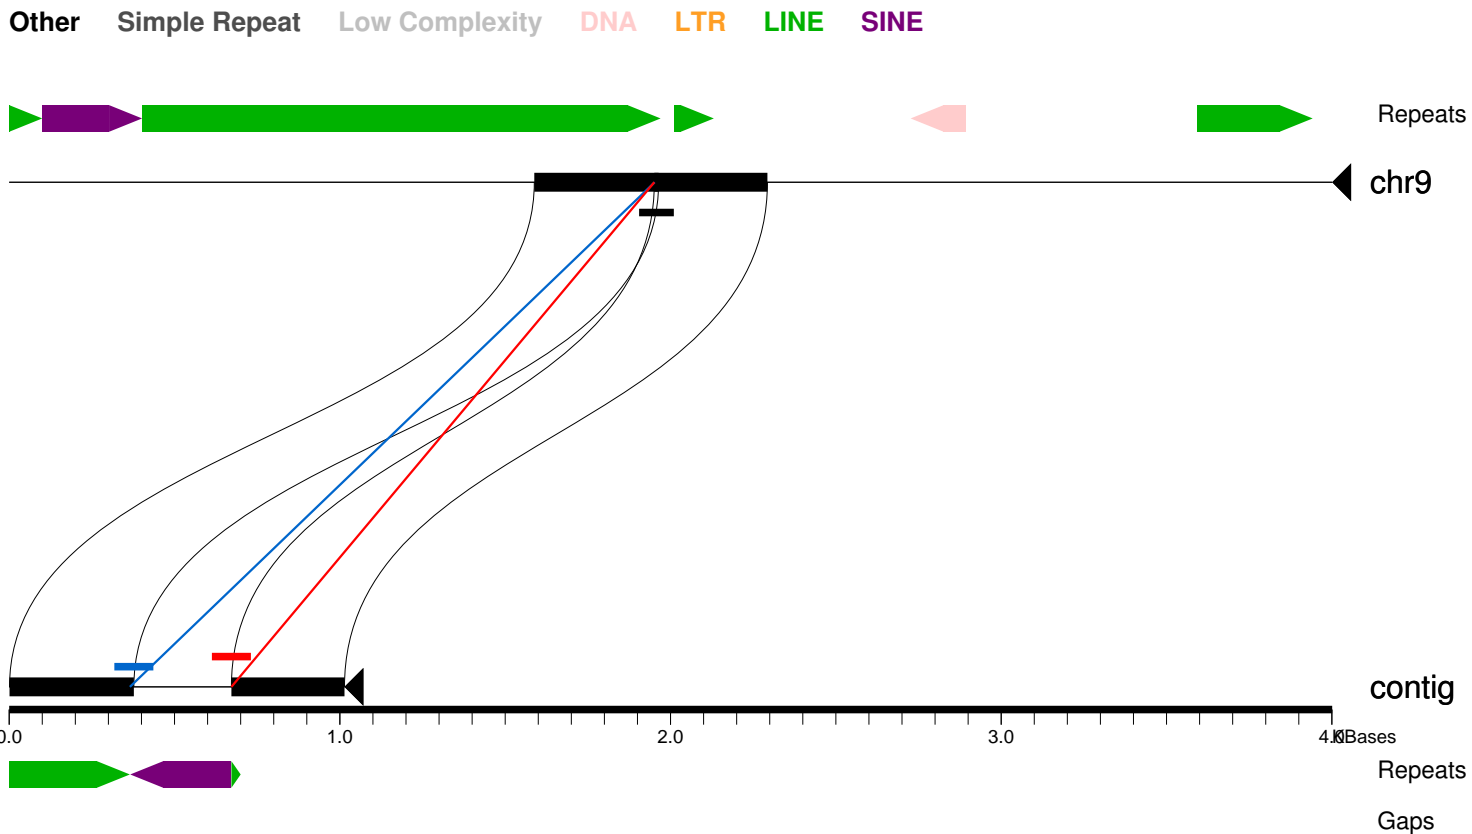



siteID: chr9\_86164569 Scaffitig1 + Breakpoint: chr9:86164536

chr9:86164484-86164595

Overlap Length: 8 INS size: 298 Genotyped: Yes

```
left  GCG----TATAAGAGTTTCCTTTT-CT----TTGCAACCTTGCCAGCATCAGTTATTTTTTGGACTTTTTT
chrom GCG----TATAAGAGTTTCCTTTT-CT----TTGCAACCTTGCCAGCATCAGTTATTTTTTGGACTTTTTT
right CCGCCCGCCTCGGCCTCCCAAAGTGCTGGGATTACAGGCGTG--AGCCACCGCGCCCGGCCGACTTTTTTA
      1**111111*11*11*11*1111*1**1111**1**11*1**11***11*1*111111111*****2
```

```
left  TTTTTTTTTTTTTTGGAGACGGAGTCTCGCTCTGTCGCCAGGCTGGAGTGCAGTGGCG
chrom ATAATAGCCATTTTGGACT-GGTGTGAGATGCTATCTC--ATTGTGCTTTTGGATT----
right ATAATAGCCATTTTGGACT-GGTGTGAGATGCTATCTC--ATTGTGCTTTTGGATT----
      2*22*22222*****222**2**222222**2**2*22*222**222*22*2*2222
```

Other Simple Repeat Low Complexity DNA LTR LINE SINE

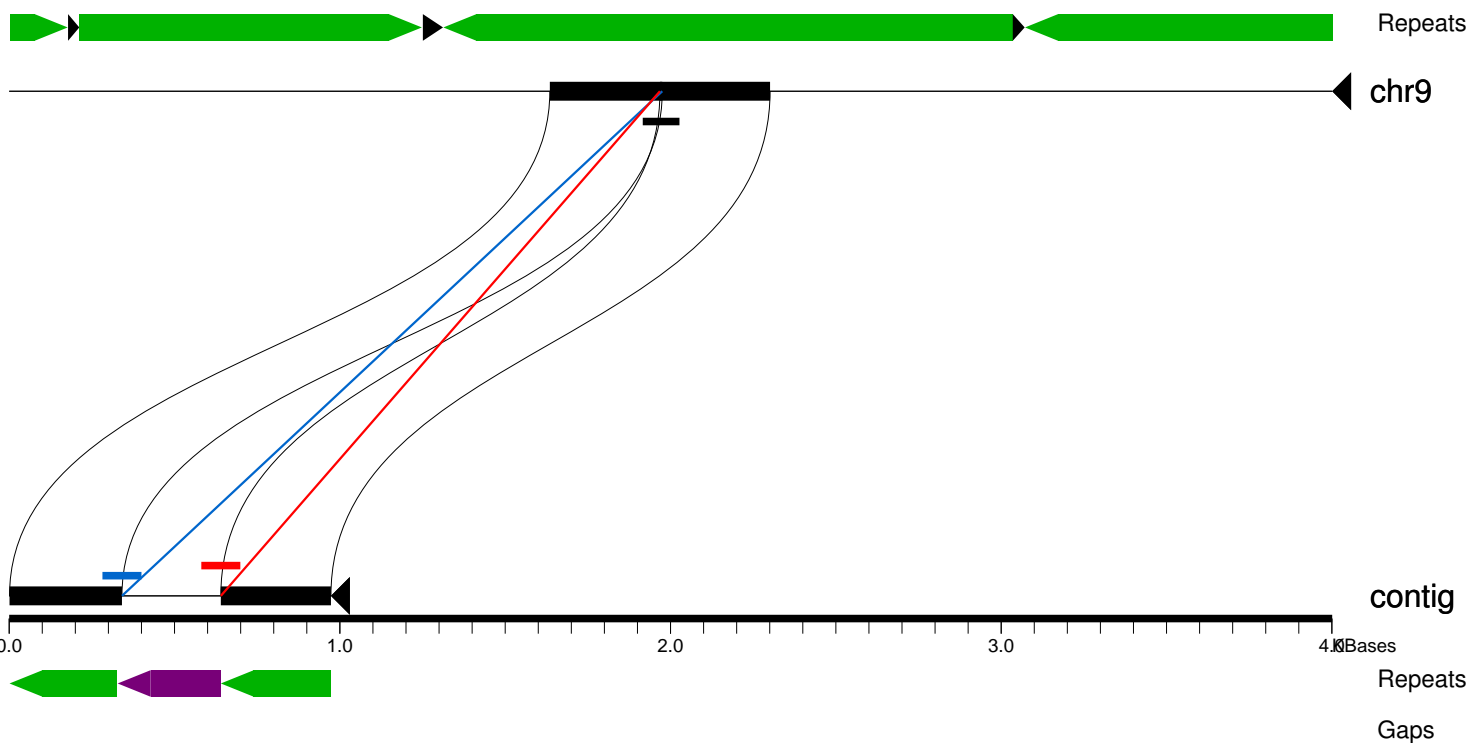

siteID: chr9\_8645763 Scaffitg3 + Breakpoint: chr9:8645764

chr9:8645719-8645823

Overlap Length: 15 INS size: 259 Genotyped: Yes

```
left  --CACTTGCACCTTTCTA-TCAATGTTAG---GTTATTATTTCT-----AACTGCTTGAAAAGATTAC
chrom --CACTTGCACCTTTCTA-TCAATGTTAG---GTTATTATTTCT-----AACTGCTTGAAAAGATTAC
right GCCACT-GCACTCCAGCCTGGACGACAGAGCGAGACTCCGTCTCAAAAAAAAAAAAAAAAAAAAGAAAAGATTAC
      11****1*****111111*11*1*11**111*11*1*111***1111111111**111111*****
```

```
left  CTTCC TTGGGAGGCCGAGGCCGGCGGATCACGAGGTCAGGAGATCGAGACCATCCCGGCTAAAA
chrom CTTCC--AGCATCTCAAA-----AT--TGTGTGTGTTGAAAAC-ATACCATGTCATTTGCC-
right CTTCC--AGCATCTCAAA-----AT--TGTGTGTGTTGAAAAC-ATACCATGTCATTTGCC-
      ****222*2*222*2*22222222**222*22**222**2*2*2*2*****22*222*2222
```

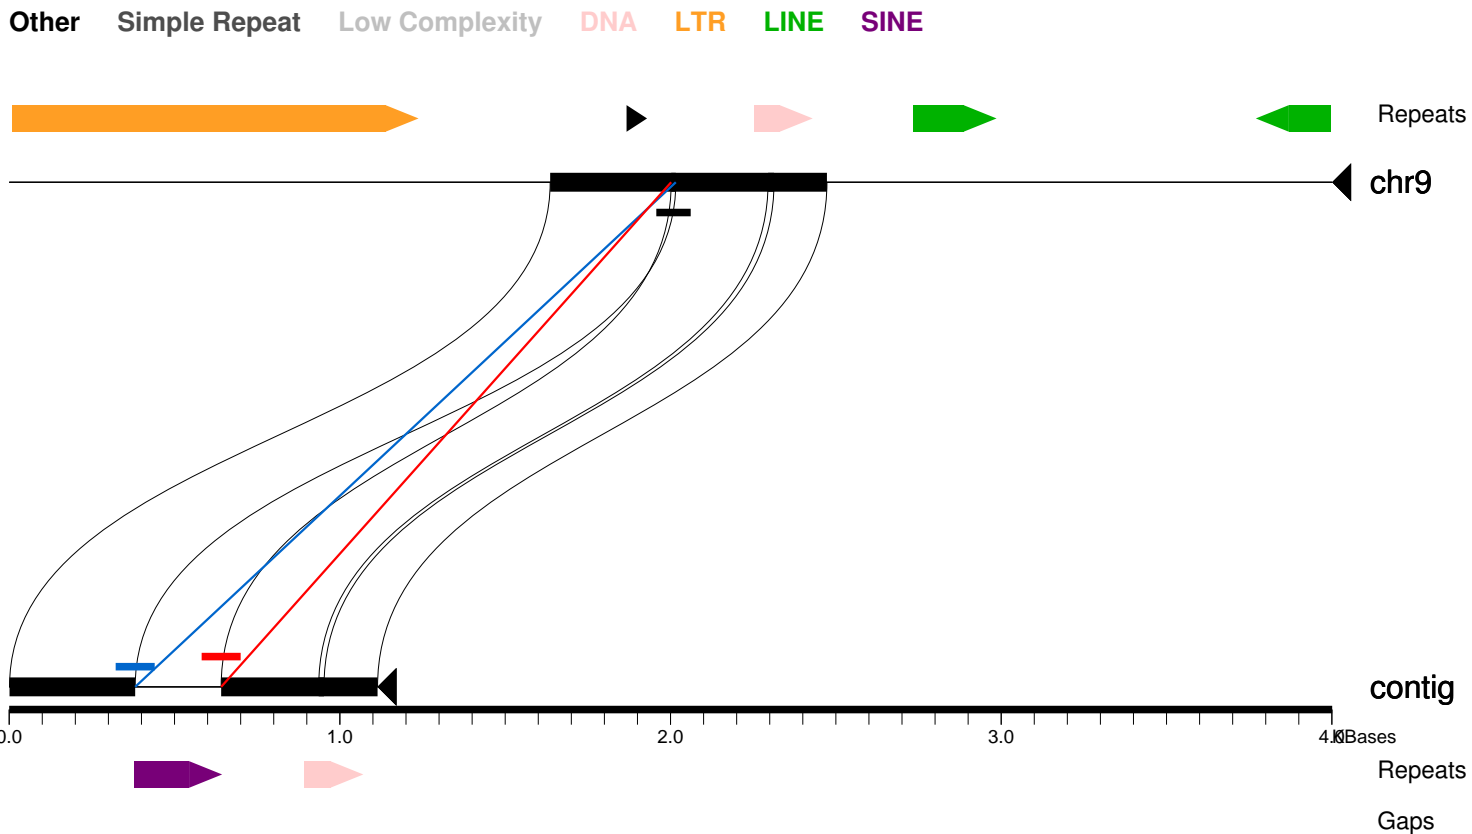

siteID: chr9\_89946026 Scafftig2 - Breakpoint: chr9:89946013

chr9:89945968-89946072

Overlap Length: 15 INS size: 310 Genotyped: Yes

```
left -----GTCAGA--GAAAAT--GT-TCAAATCAAAAAGTGCAGGCGTAAGACCTTAGAAAAGATTGAG
chrom -----GTCAGA--GAAAAT--GT-TCAAATCAAAAAGTGCAGGCGTAAGACCTTAGAAAAGATTGAG
right AGCCTGGGCGACAGAGCGAGACTCCGTCTCAAAAAAAAAAAAAAAAAAAAAAAAAAAAAAAAAAAAAAAAGATTGAG
      1111111111*1****11*1*1*11*1*****11****1111*11111*1*1111*1*****
left  ACAGGCCGGGCGCGGTGGCTCACGCCTGTAATCCCAGCACTTTGGGAGGCCGA--GGCGGGCGGA
chrom ACAG-----TGCTCAA-----TAACCTTCTTCATTTCCAAGACAGAAGGGCTTCCAAG
right ACAG-----TGCTCAA-----TAACCTTCTTCATTTCCAAGACAGAAGGGCTTCCAAG
      ***2222222222**2****222222***2*222222***222**2*2**22***222*222
```

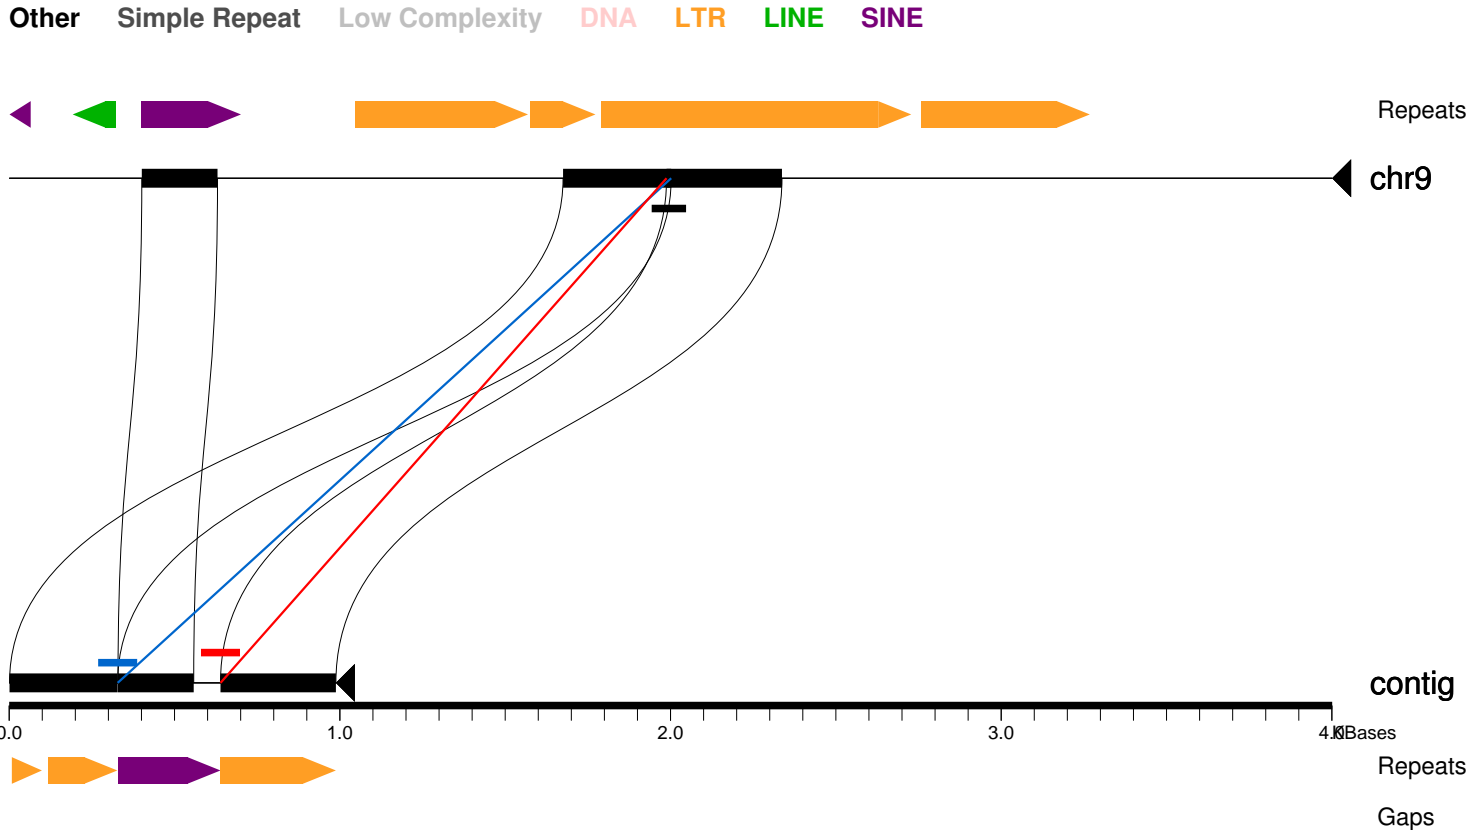

siteID: chr9\_90845815 Scaffitg2 + Breakpoint: chr9:90845791

chr9:90845753-90845850

Overlap Length: 22 INS size: 176 Genotyped: Yes

```
left  GAA----AATACAGA-----ACAGC-AGA---TGCCCCATTGTAAGCACTC----AATTATATTGT
chrom GAA----AATACAGA-----ACAGC-AGA---TGCCCCATTGTAAGCACTC----AATTATATTGT
right CCACTGCACTCCAGCCTGGGCGACAGAGCGAGACTCTGTCTCAAAAAAAAAAAAAAAAAAAAAAAATTATATTGT
      11*11111*1*1***11111111111*1***1***111*1*1**1111*11*11111111******
```

  

```
left  CTTTTTTTTTTCATACAAAAAATTAGCCGGGCGCGGTGGCGGGCGCCTGTAGTCCCAGCTACTCGGGAGGC
chrom CCTTTTTTTTTTCTT-----TTTTCTTT-----TACTTTTTTTCATTCTGAAACATTATAG--
right CTTTTTTTTTCTT-----TTTTCTTT-----TACTTTTTTTCATTCTGAAACATTATAG--
      *N*****2*22222222**22*2222222222222222*222*2*22*2**2*22**22222*22
```

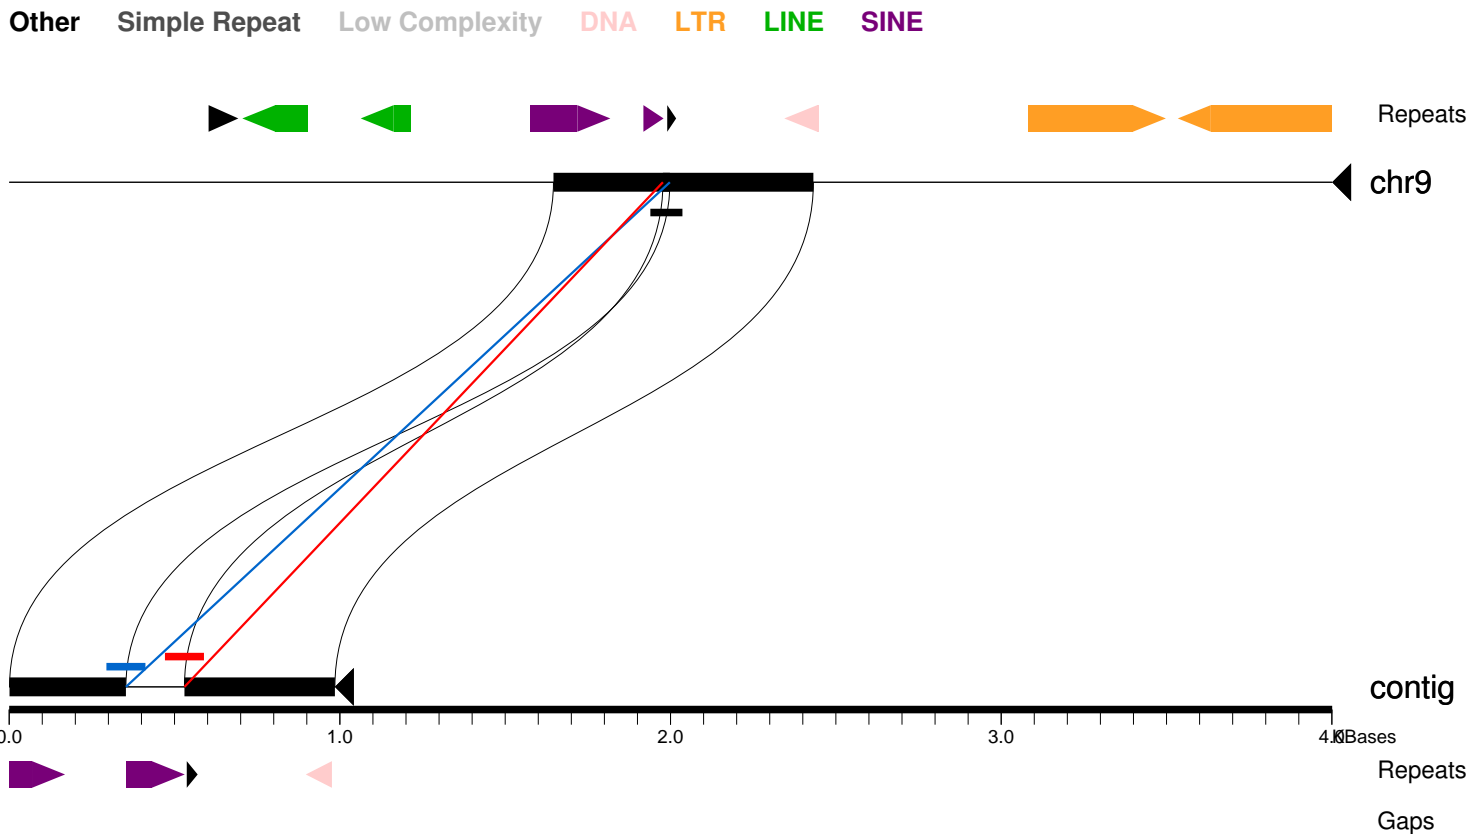

siteID: chr9\_91947707 Scafftig3 + Breakpoint: chr9:91947692

chr9:91947648-91947751

Overlap Length: 9 INS size: 323 Genotyped: No

```
left  -----TGTAAGGAATT--GCTAAACTATTAAAT-ATCTCCCAAAGTGGCTGG-----AACGTTTTTTC
chrom -----TGTAAGGAATT--GCTAAACTATTAAAT-ATCTCCCAAAGTGGCTGT-----AACGTTTTTCA
right  CTCCGCTTCCCAGGTTACGCCATTCTCCTGCCTCAGCCTCCCAGTAGCTGGGACTACAACGTTTTTCA
      111111*1111*11*111*1*11*11*111*1*1*11*11***1***N111111******22

left  TTCTTTTTTTTTTTTTTTTTNNNNNNNNNNNNNNNNNNNNNNNNNNNNNNNNNNNNNNNNNNNNNNNNNNNNNN
chrom TTCTT-----ACCAGCAATGGATAAGGATTTCTGTTGTCAAAGTGTTCGGATT
right TTCTT-----ACCAGCAATGGATAAGGATTTCTGTTGTCAAAGTGTTCGGATT
      *****22222222222222222222222222222222222222222222222222222222222222222222
```

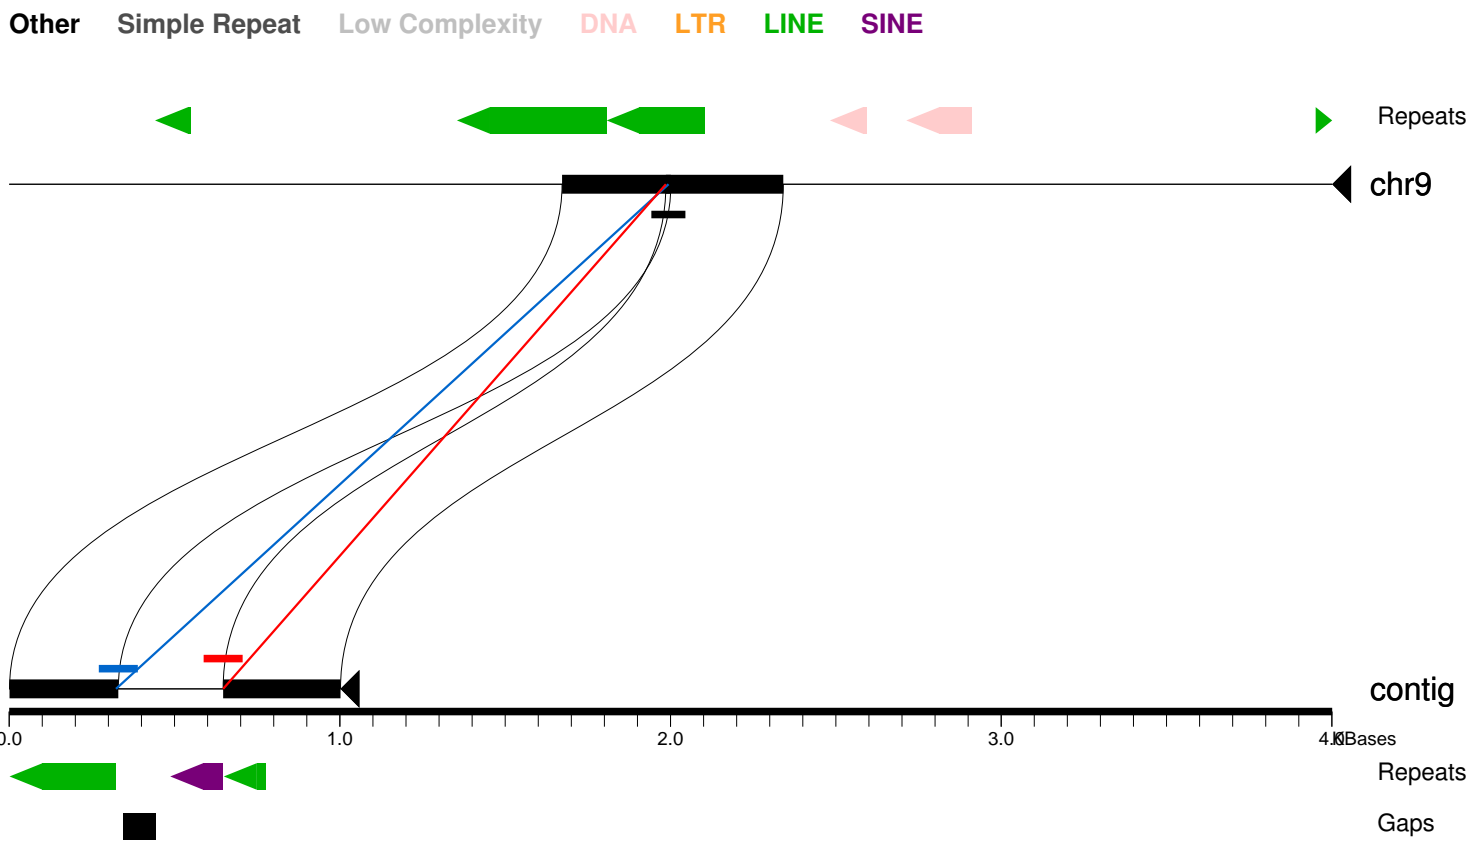

siteID: chr9\_93057526 Scaffitg1 - Breakpoint: chr9:93057512

chr9:93057352-93057682

Overlap Length: 11 INS size: 301 Genotyped: Yes

```

left   A-----CAAGATTATCCACGTCTTAGTTCATAAAACAAGTCTTGAAAAATTTACAAAGATTAAAAAT
chrom  AATAAGTCTACAAGATTATCCACGTCTTAGTTCATAAAACAAGTCTTGAAAAATTTACAAAGATTAAAAAT
right  TTTA-GTAGAGACGGGGTTTCAC--CTT-GTTAGCCAGGATGGTCTCGA----TCTCCTGACCTCGTGAT
1N22  22NN21*1*1111*1***11***1***1111*11111***1**1111*1*1*11*11*1111**
  
```

```

left   CATACTAAGTATCTTTTCTGACCATAAAGGGAATAAACTAGAAATCAATAGCAAAAAGGAGAGCTGAAAAA
chrom  CATACTAAGTATCTTTTCTGACCATAAAGGGAATAAACTAGAAATCAATAGCAAAAAGGAGAGCTGAAAAA
right  CCGCCCGC----CTCGGCCTCCCA-AAGTG-----CTGGGATT-----ACAGGCGTG-----A
*111*11111111**111*111***1***1*11111111**1*1*1*11111111*1***1*1*11111111*
  
```

```

left   AACACTAATATGTGAAAGT-AACACACTGTTTTTTTTTTTTTT-----TT--
chrom  AACACTAATATGTGAAAGT-AACACACTGTATAATAATGGGTTAAGGAAGAGGTCACAAGGAAAAATTAG
right  GCCACC----GCGCCCGGCCAACACACTGTATAATAATGGGTTAAGGAAGAGGTCACAAGGAAAAATTAG
11***1111111*1*1111*11*****222*22*222**222222222222222222222222*22
  
```

```

left   ----TTTTTTGAGACGGAGTCTCGCTC---TGTCGCCCAGGCTGGAG---TGCAGTGGCGCGATCTCGG
chrom  AAAATATCTCGAACCAAAAGGAACACACGTTTGTTTAACATACTAATTCTGCTTCAGTGTACATTTGAAGG
right  AAAATATCTCGAACCAAAAGGAACACACGTTTGTTTAACATACTAATTCTGCTTCAGTGTACATTTGAAGG
2222*2*2*2**22*22**222*2*2*222***2222**22**2222222*2*****2*2*22*222**
  
```

```

left   CTCACTGCAAGC---TCCGCCTCCCGGTTACGCCATTCTCCTGCCTC---
chrom  GAAATGTTTACCCTTTTCAGATTTTTTTTTTCCAGAAAAATAGGTGGGCATTCAA
right  GAAATGTTTACCCTTTTCAGATTTTTTTTTTCCAGAAAAATAGG-----
222*22222*2*222*2*22*222222*2**2222**222NNN11N1N
  
```

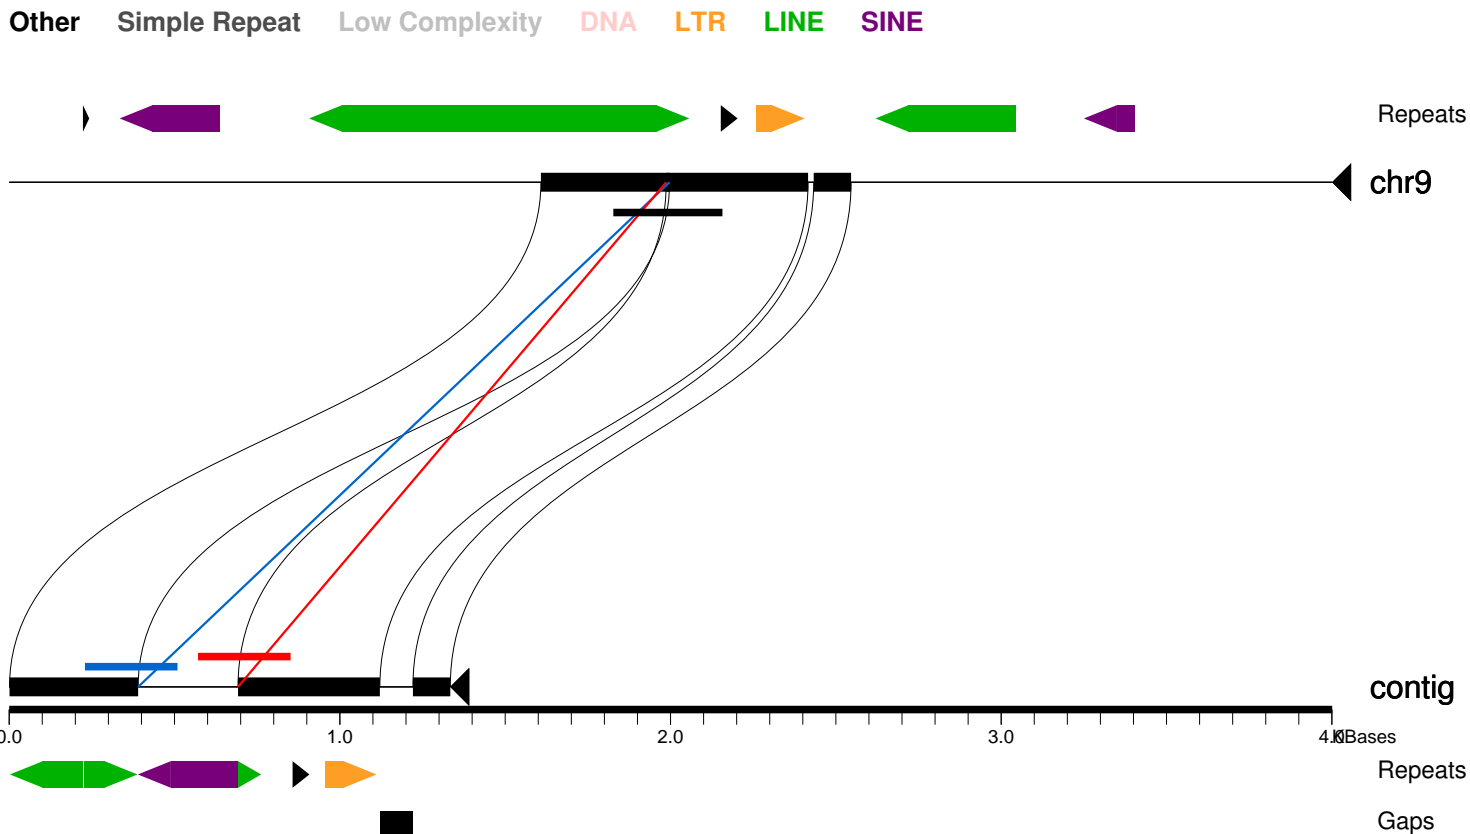



siteID: chr9\_93194551 Scaffitig4 + Breakpoint: chr9:93194532

chr9:93194485-93194590

Overlap Length: 13 INS size: 293 Genotyped: Yes

```
left  --TTAA-TTGTTAG-----TAGGCTA--AAAAGAGAAAAG--TTAAATGTTATAGCTTTTAAATTTTA
chrom --TTAA-TAGTTAT-----TAGGCTA--AAAAGAGAAAAG--TTAAATGTTATAGCTTTTAAATTTTA
right CCTGACCTCGTGATCCGCCCGCCTCGGCCTCCCAAAGTGCTGGGATTACAGGCGTGAGCT---AATTTTA
      11*1*11*N*1*21111111111*1***11111****1*111*11***1*1*1111****111*****

left  AGTTTTFTTTTTGTGTTGTTGTTGTTTTTTTTTTGAGACGGAGTCTCGCTCTGTCACCCAGGCTGGAG
chrom AGTTTFTAACCTTA-----AGCATTTTATTTAGTC--ATTCTTAACCTGGCA---ATGAATAAAA
right AGTTTFTAACCTTA-----AGCATTTTATTTAGTC--ATTCTTAACCTGGCA---ATGAATAAAA
      *****222**2222222222*22*****2**2**2*22*2***2222***2**222*2*2222*2
```

Other Simple Repeat Low Complexity DNA LTR LINE SINE

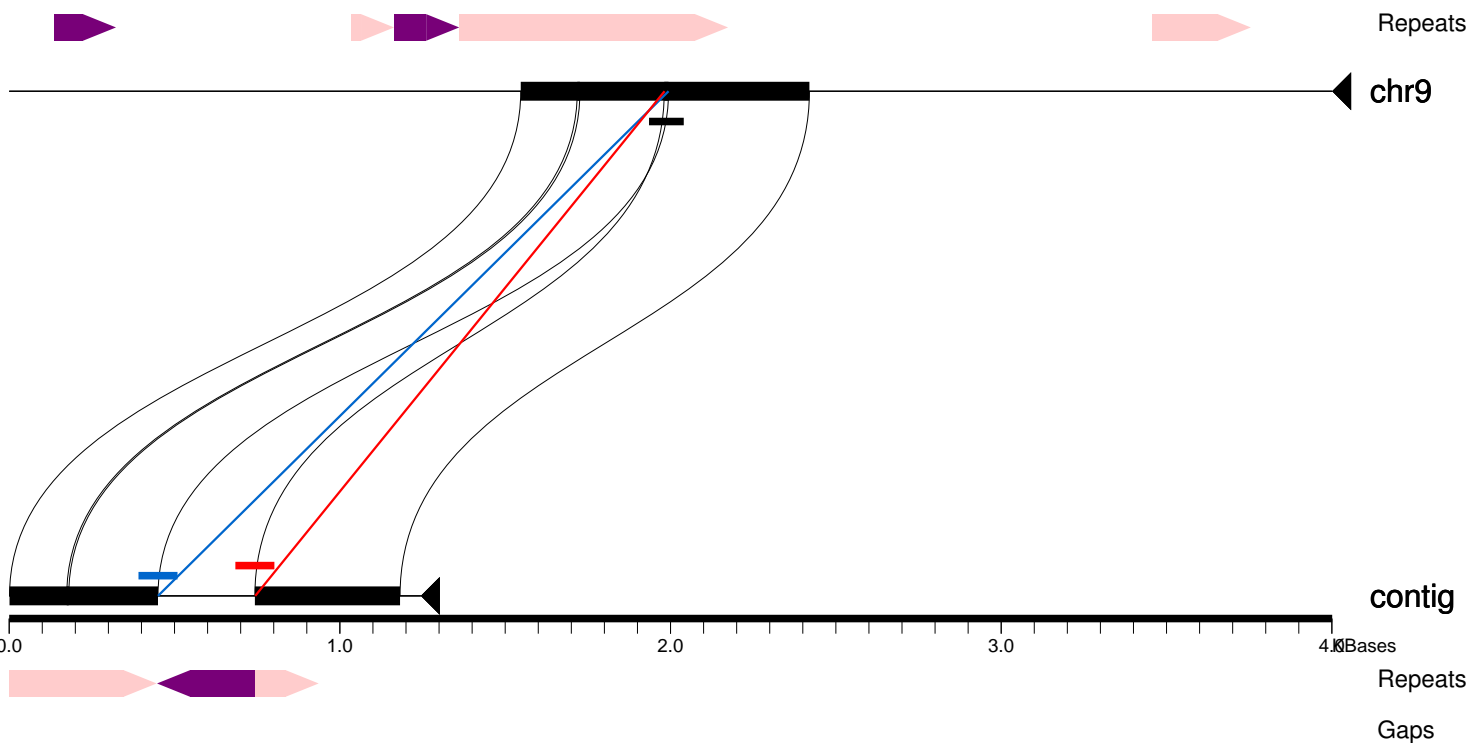







siteID: chr9\_98696731 Scaffold4 + Breakpoint: chr9:98696737

chr9:98696687-98696796

Overlap Length: 10 INS size: 303 Genotyped: Yes

```
left  AGAAATAAGTAGTA-----TGCTTATAGAAAAAATGAATCTAGCAAAACCAATATGTGATTTTTF
chrom AGAAATAAGTAGTA-----TGCTGATAGAAAAAATGAATCTAGCAAAACCAATATGTGATTTTTTA
right CCGCCCGCCTCGGCCTCCCAAAGTGCTGGGATTACAAGCGTGAGCCACCGCGCCCGGCCTGTGATTTTTTA
      1111111111*1*1111111111111111****211*11*1**11111*1*1*1*11111**11111*********2
```

```
left  TTTTTTTTTTTGAGACGGAGTCTCGCTCTGTGGCCAGGTGGGAGTGCAGTGGCGCAA
chrom TACTAATAATAAAAACTGCCAAAAAATATGT----CTTTAGTGACTTCTCTTC-----
right TACTAATAATAAAAACTGCCAAAAAATATGT----CTTTAGTGACTTCTCTTC-----
      *22*22*22*22*2**2*22222222*2***2222*2222*2**2*2*22*2222222
```

Other Simple Repeat Low Complexity DNA LTR LINE SINE

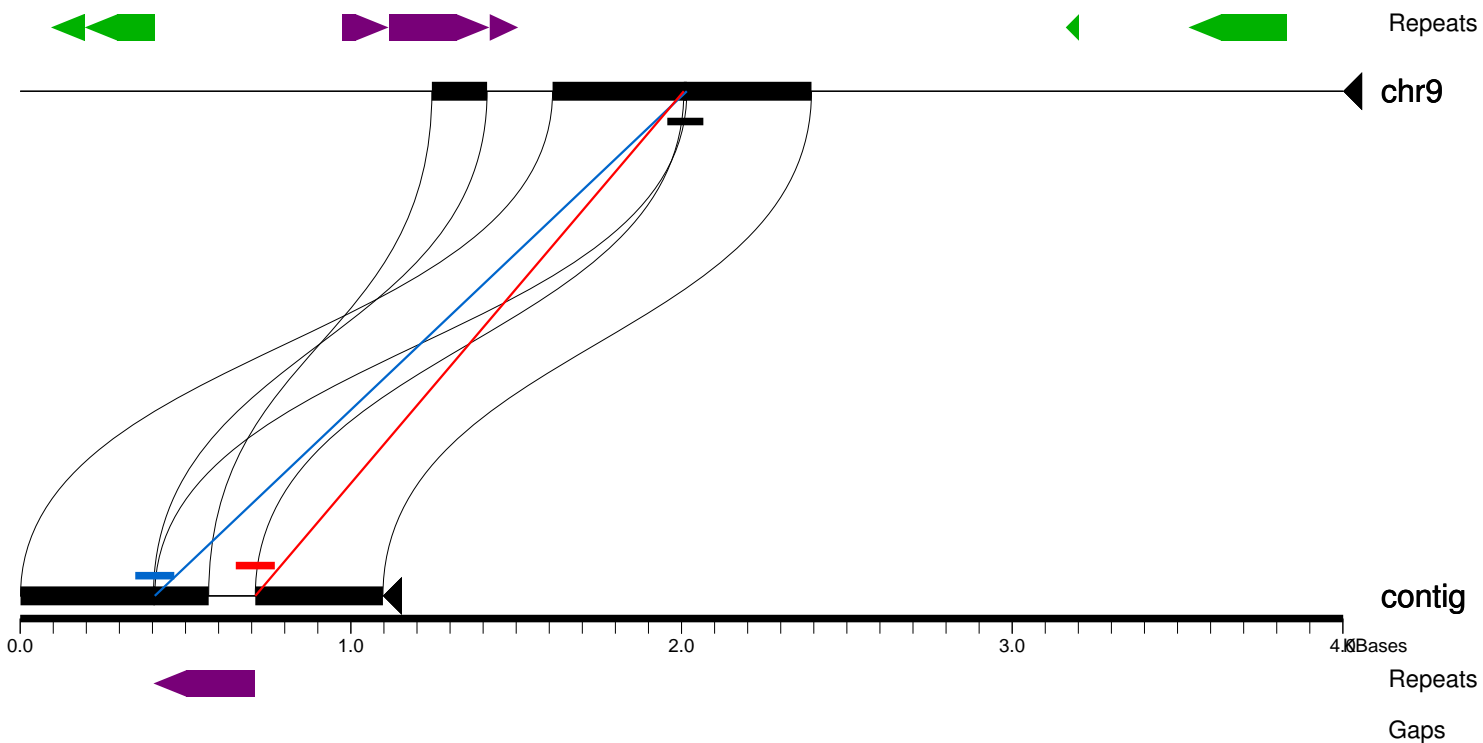





siteID: chrX\_106661472 Scaffig2 + Breakpoint: chrX:106661455

chrX:106661415-106661520

Overlap Length: 20 INS size: 414 Genotyped: No

```
left  CATGGAAGCCCCTTGAGGT--AAGTGCTGTTCTT-CA---CTGAT-----TGCCCTGC-AACACTGCTT
chrom CATGGAAGCCCCTTGAGGT--AAGTGCTGTTCTT-CA---CTGAT-----TGCCCTGC-AACACTGCTT
right TCCGCCCGCCTCGGCCTCCCAAAGTGCTGGGATTACAGGCGTGAGCCACCGCGCCCGGCCAACACTGCTT
      111*111***1*1111111111*****111**1**1111***1111111111***1**1*****
```

```
left  TCTTNNNNNNNNNNNNNNNNNNNNNNNNNNNNNNNNNNNNNNNNNNNNNNNNNNNNNNNNNNNNNNNNNN
chrom TCT-----GAACATCTACACTTCACCCCTTGCTGCCTTTATCCACAATTCATTA
right TCT-----GAACATCTACACTTCACCCCTTGCTGCCTTTATCCACAATTCATTA
      **22222222222222222222222222222222222222222222222222222222222222222222
```

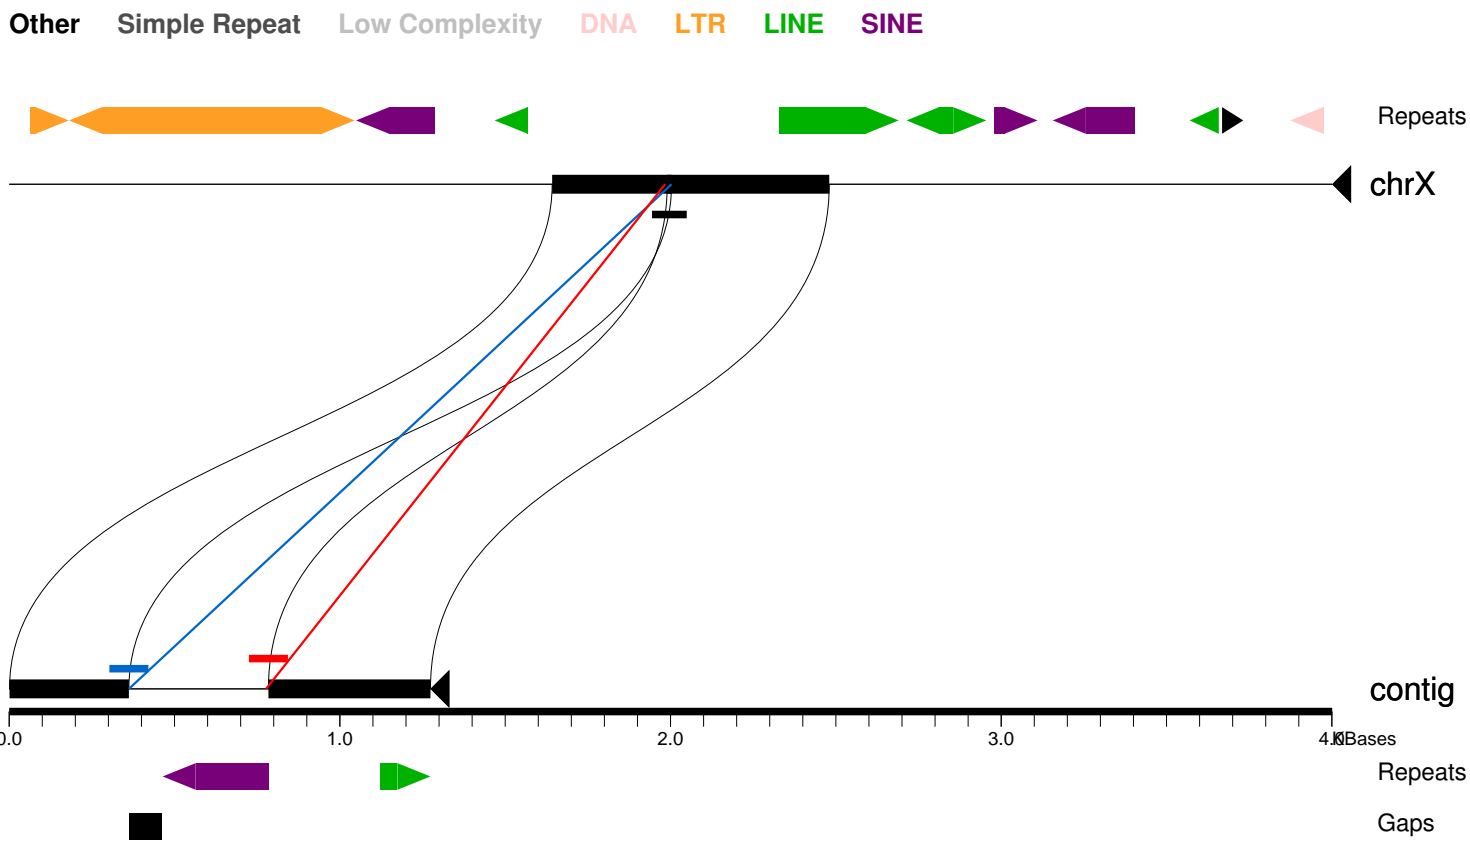





siteID: chrX\_116627629 Scaffitig4 + Breakpoint: chrX:116627631

chrX:116627587-116627690

Overlap Length: 13 INS size: 309 Genotyped: Yes

```
left  AAATATCCACATTTAAAGCAAA-----AGT-----TGAAAAAGAAAGGAAAAATTTAAGTAAAGTAC
chrom AAATATCCACATTTAAAGCAAA-----AGT-----TGAAAAAGAAAGGAAAAATTTAAGTAAAGTAC
right CACCCGCCTCGGCCTCCCAAAGTGCTGGGATTACAGGCGTGAGCCACCGCGCCCGGCCCAAGTAAAGTAC
      1*11111*1*11111111****111111111*1*11111111***111*1111*111111111*****

left  TTTTTTTTTTTTTTTTTTTTTTTTGGAGACGGAGTCTCGCTCTGTTCGCCAGGCCGACTGCGGACTGC
chrom TTTATTACCACTTAATGT-----AATTCCCATCT-----CCTAAAAATGTTGGCTTATTTT
right TTATTACCACTTAATGT-----AATTCCCATCT-----CCTAAAAATGTTGGCTTATTTT
      **2**22222**22*2*2222222222*2*22*22***22222**222222*222**22*2*22
```

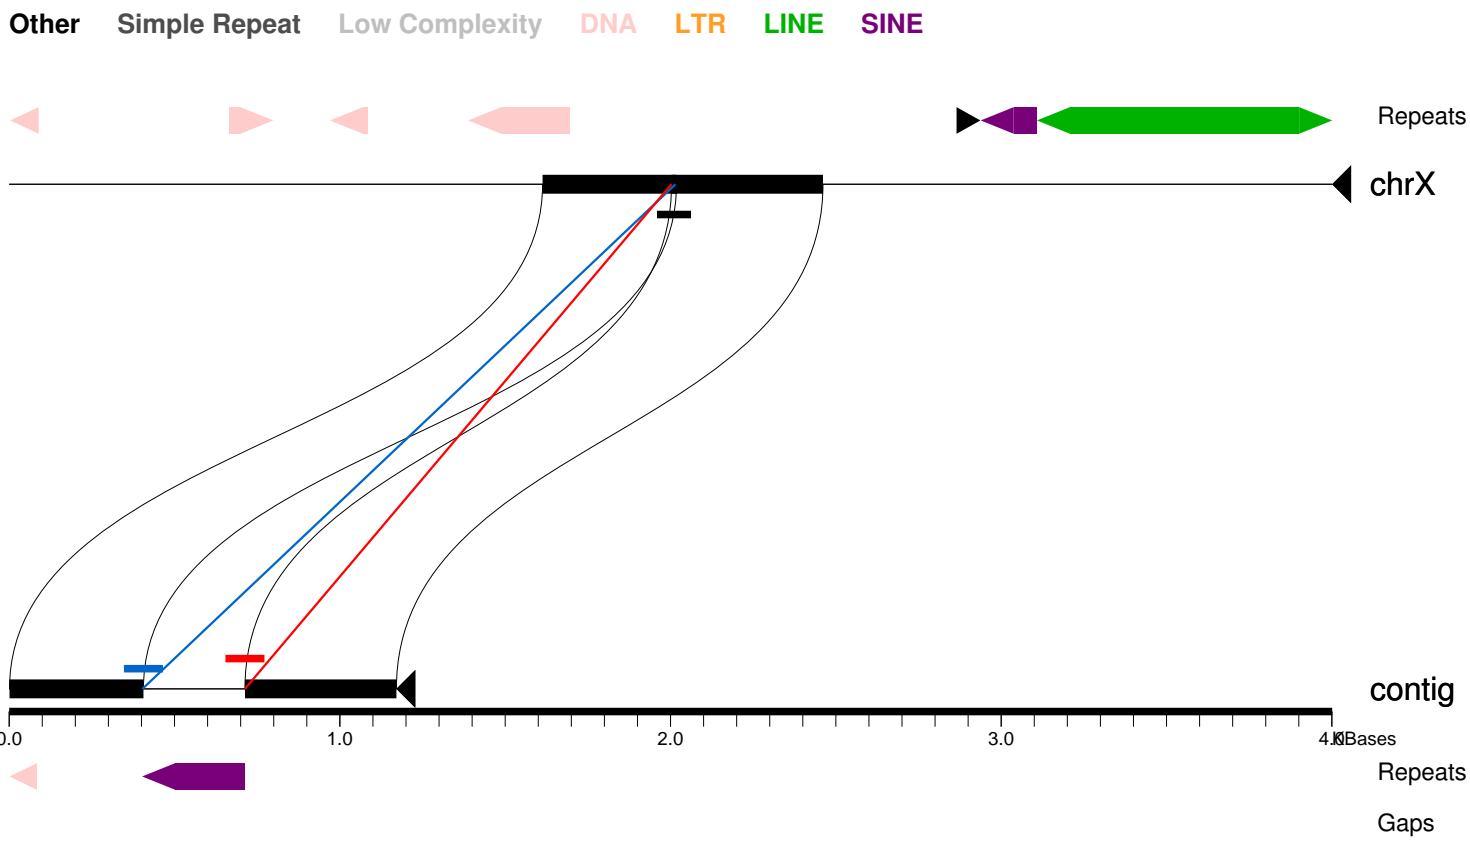

siteID: chrX\_116759204 Scaffitg1 - Breakpoint: chrX:116759187

chrX:116759130-116759246

Overlap Length: 3 INS size: 418 Genotyped: No

```
left AACCCTAAGCAGCAGAAATTTTCAGAAATACTCATTTCCTAATCATTA---ATCCTGACTGG-AAANNNNNNN
chrom AACCCTAAGCAGCAGAAATTTTCAGAAATACTCATTTCCTAATCATTA---ATCCTGACTGG-AAACAATC
right TCCGCCC-GCCTCGGCCTCCCA-AAGTGCTGGGATTACAGGCGTGAGCCACCGCGCCCGGCAAAAACAATC
      11*1*111**11*1*11*11**1**1*1**1111*111*11*1*1*111*1*11*1*1**1**222222
```

  

```
left NNNNNNNNNNNNNNNNNNNNNNNNNNNNNNNNNNNNNNNNNNNNNNNNNNNNNNNNNNNNNNNNNNNNNNNNN
chrom TTACCCAGCTATGATATTA AAAAAGATATCAA ACTGATACAAAAGGAGCAACT--
right TTACCCAGCTCTGATATTA AAAAAGATATCAA ACTGATACAAAAGGAGCAACT--
      2222222222N22222222222222222222222222222222222222222222222N2222222222
```

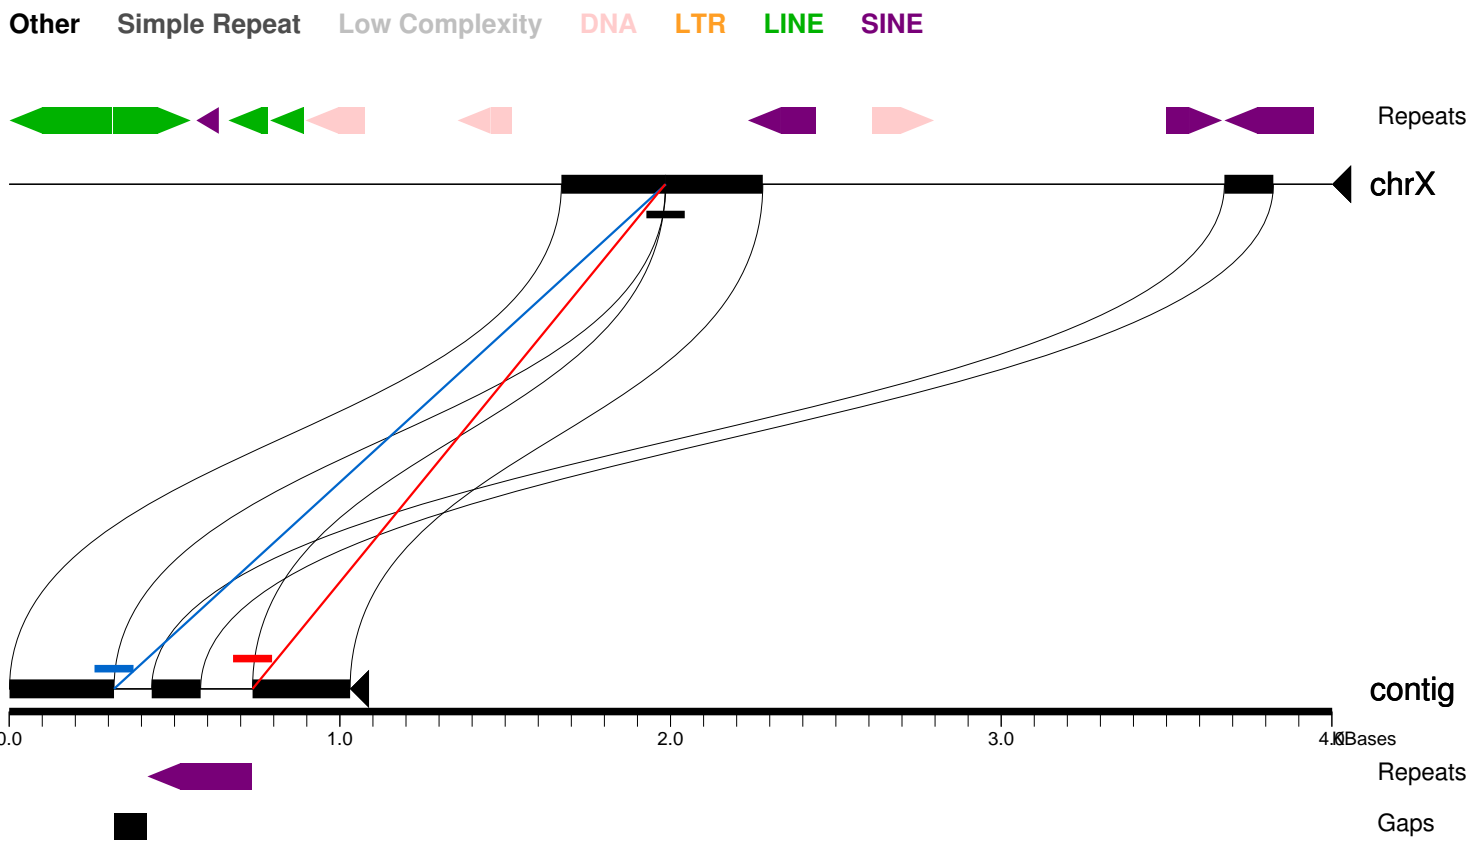





siteID: chrX\_119527856 Scaffitg3 + Breakpoint: chrX:119527843

chrX:119527797-119527902

Overlap Length: 14 INS size: 294 Genotyped: Yes

```
left  CTGCA-GCTTTGTTCTT----ACTGCTCAAAAAT---TGTTTTAGTTATGT-----GGATTCTGTTGTGGT
chrom CTGCA-GCTTTGTTCTT----ACTGCTCAAAAAT---TGTTTTAGTTATGT-----GGATTCTGTTGTGGT
right CCGCCCGCCTCGGCCTCCCAAAGTGCTGGGATTACAGGCGTGAGCCACCGCGCCCGGCCCTCTGTTGTGGT
      *1**11*1*1*11**11111*1****111*1*1111*11*1**11*11111111**11*****
```

```
left  TTTTTTTTTTTTTTTTTGAGACGGAGTCTCGCTCTGTCGCCAGGCTGGAGTGCAGTGGCGGG
chrom TTTATAAGCATTTTA-----GATTTTTTTTCTATTAATAA-----AGTCAAAAAATAAC
right TTTATAAGCATTTTA-----GATTTTTTTTCTATTAATAA-----AGTCAAAAAATAAC
      ***2*22222****22222222**2*2*222***2*22222*222222***22*22222222
```

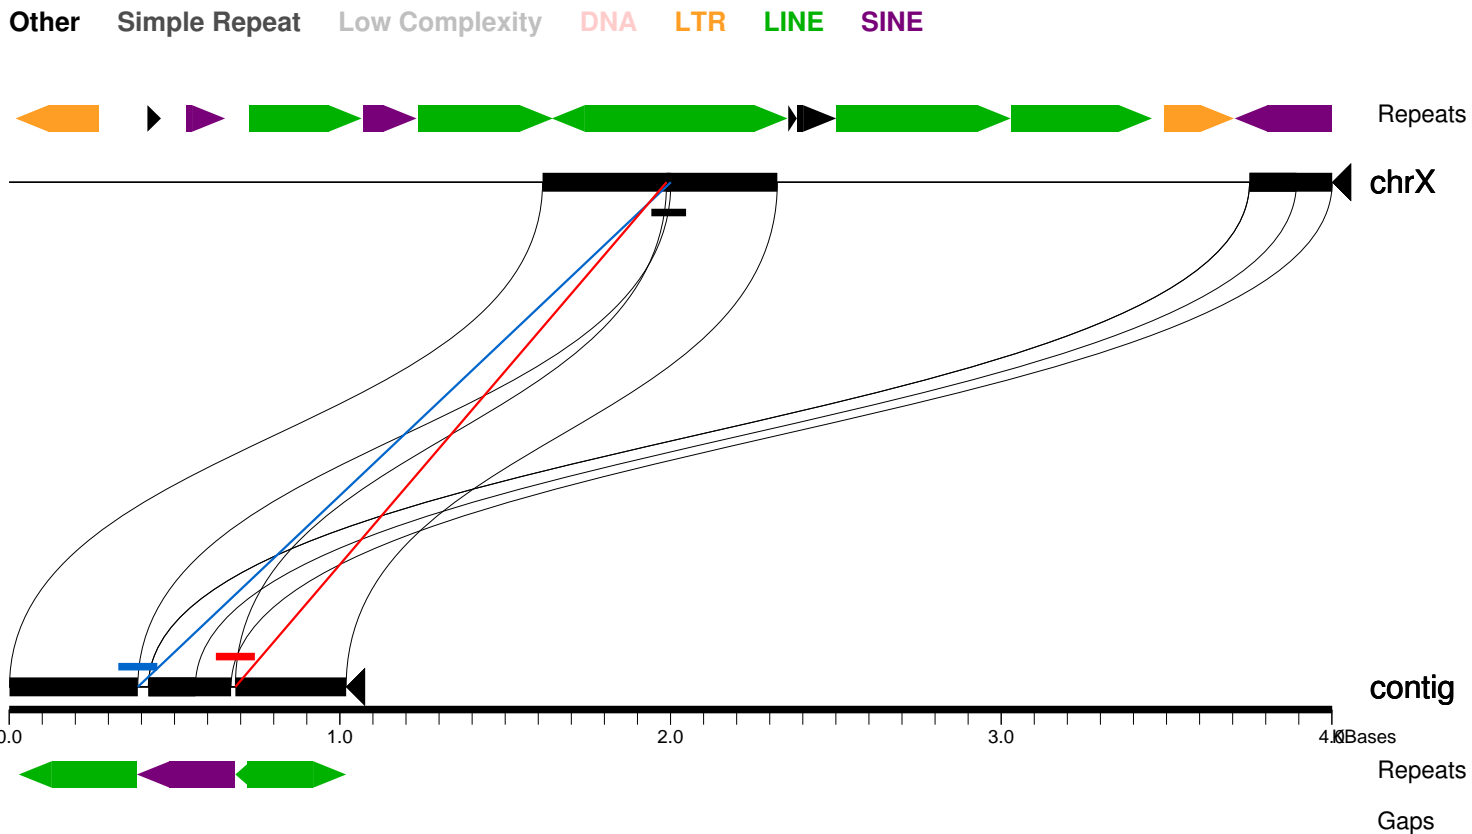



siteID: chrX\_122672390 Scaffitg1 + Breakpoint: chrX:122672364

chrX:122672319-122672423

Overlap Length: 15 INS size: 320 Genotyped: Yes

```
left  C-----TTCTTAAAAACAATTATTTTGAATTCTTT--GTGAGGTCACCTTGTA-----GATCTCCATTT
chrom C-----TTCTTAAAAACAATTATTTTGAATTCTTT--GTGAGGTCACCTTGTA-----GATCTCCATTT
right CACCCGCCTCGGCCTCCCAAAGTGCTGGGATTACAGGCGTGAGCCACCGCGCCCGGCCCGATCTCCATTT
      *11111111*11111111***111111*1*1***111111*****1111*11*111111111*****
```

```
left  CTTTFFFFFFFFFFFFFFFFFFFFFFFFFFFFFFFFFFFFFFFFGAGACGGAGTCTCGCTCTGTCGCCCAGG
chrom CTTTAGAGTTGGTCCCTGGTGCTTTATTTTGTTC-----TTTGGTGGTGTGCAT-----
right CTTTAGAGTTGGTCCCTGGTGCTTTATTTTGTTC-----TTTGGTGGTGTGCAT-----
      ***2222**22*222*22*22***2***2**2222222222*2*2*222***2222222
```

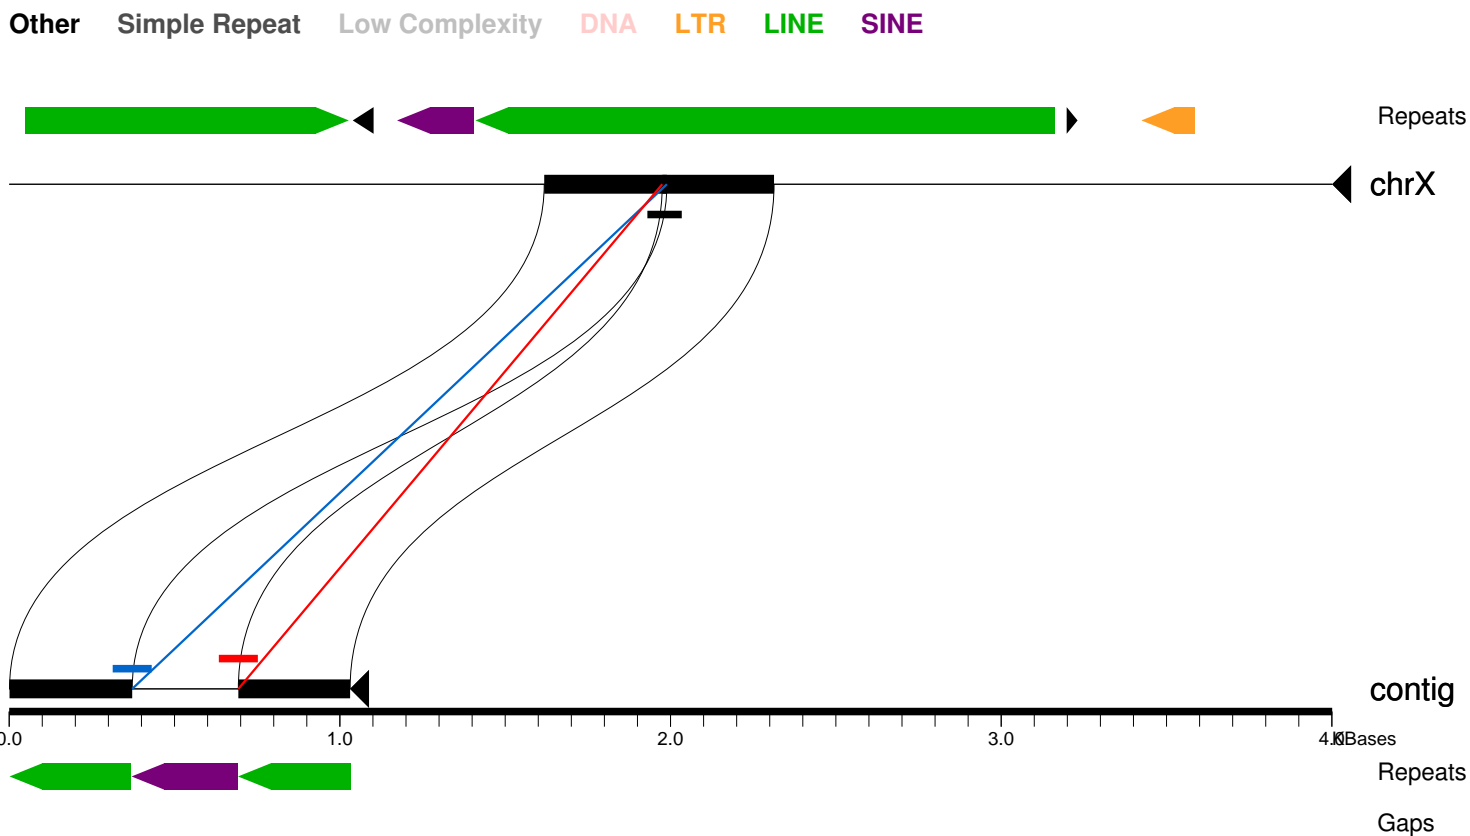





siteID: chrX\_126290670 Scaffitig4 + Breakpoint: chrX:126290677

chrX:126290634-126290736

Overlap Length: 17 INS size: 268 Genotyped: Yes

```
left  --ATT-----CAGGTTTTCCCTCTTCCTCAGGTT-----TTATTTATTTATTTATTTATTTTACA
chrom --ATT-----CAGGTTTTCCCTCTTCCTCAGGTT-----TTATTTATTTATTTATTTATTTTACA
right CGATCTCCTGACCTCGTGATCCGCCCGCTCGGCCTCCCAAAGTGCTGGGATTACAGGCTTATTTTACA
      11**111111111*11**11***11*11***1*11*11111111*11*1111***11111*****
```

```
left  ATTCTTTTTTTTTTTTTTTTTTTTTTTTTTTTTTTTTGAGACGGAGTCTCGCTCTGTCGCCAGGC
chrom ATTCTTGTAGGCTATATAAATTCAGGTTGTAAGTTCAG-----GCCTTTTC----AG--
right ATTCTTGTAGGCTATATAAATTCAGGTTGTAAGTTCAG-----GCCTTTTC----AG--
      *****2*2222*2*2*22**2*2222*2*2222**2**2222222222**22*2**2222**22
```

Other Simple Repeat Low Complexity DNA LTR LINE SINE

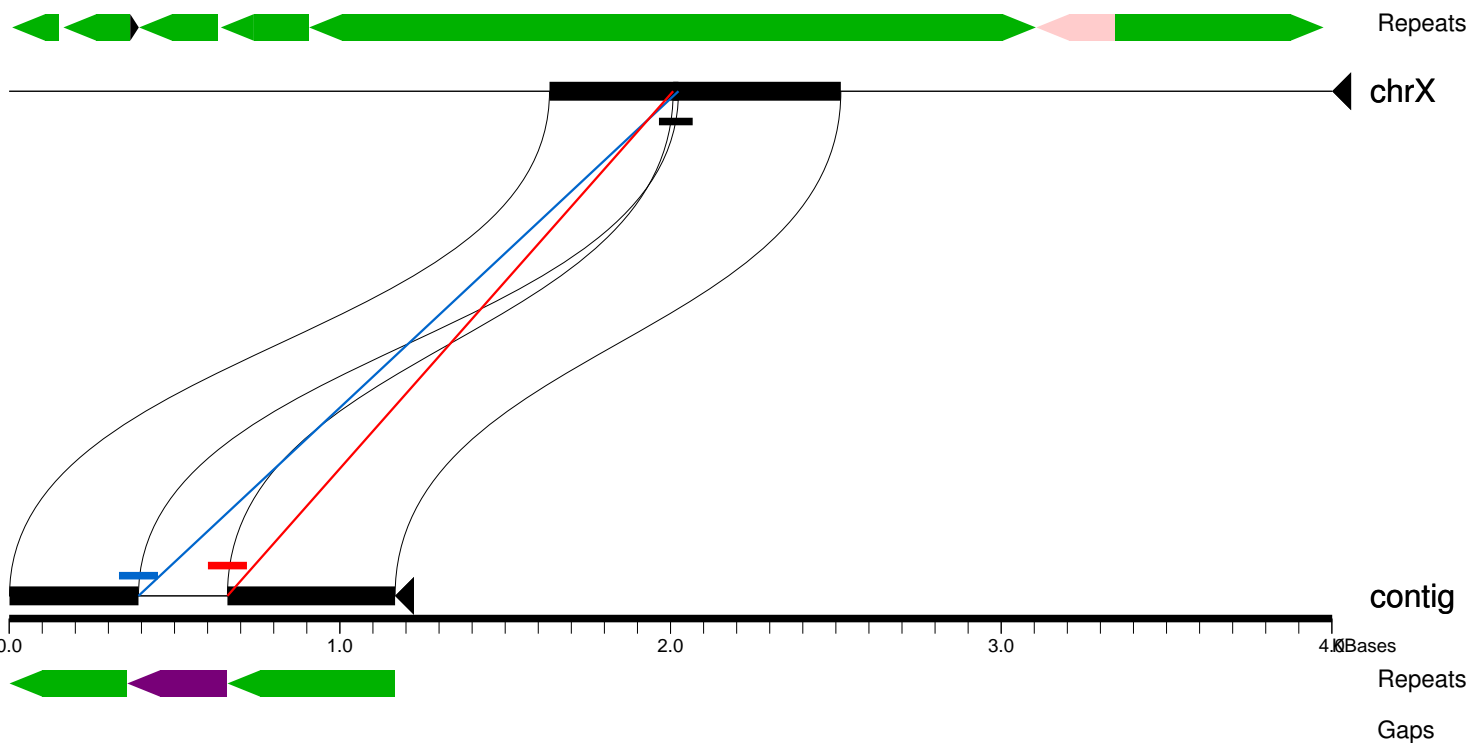

siteID: chrX\_130921946 Scaffig2 + Breakpoint: chrX:130921943

chrX:130921896-130922002

Overlap Length: 10 INS size: 300 Genotyped: Yes

```
left  -----GATTTTATTCCTTT--TTCTGGCTCAATAATCTT---CCTTTTTATATGTATGTCACATTTT
chrom -----GATTTTATTCCTTT--TTCTGGCTCAATAATCTT---CCTTTTTATATGTATGTCACATTTTC
right CCGCCCGCCTCGGCCTCCCAAAGTGCTGGGATTACAGGCGTGAGCCACCGCGCCCGGCCGTCACATTTTC
      1111111111*111111***111111*1****1111*1*11*1*111**1111111111*111*****2
```

```
left  TTTTTTTTTTTTTTTTTTGGAGACGGAGTCTCGCTTTGTCGCCAGGCTGGAGTGCAGTGGCG
chrom TTAATCCATTCATCCGTCAGT-GAACACTTAGGTTG-----ATTCT--ATATCTTTG---
right TTAATCCATTCATCCGTCAGT-GAACACTTAGGTTG-----ATTCT--ATATCTTTG---
      **22*222**22*222*2**22*2*22**2222**222222*22**22*222*22**222
```

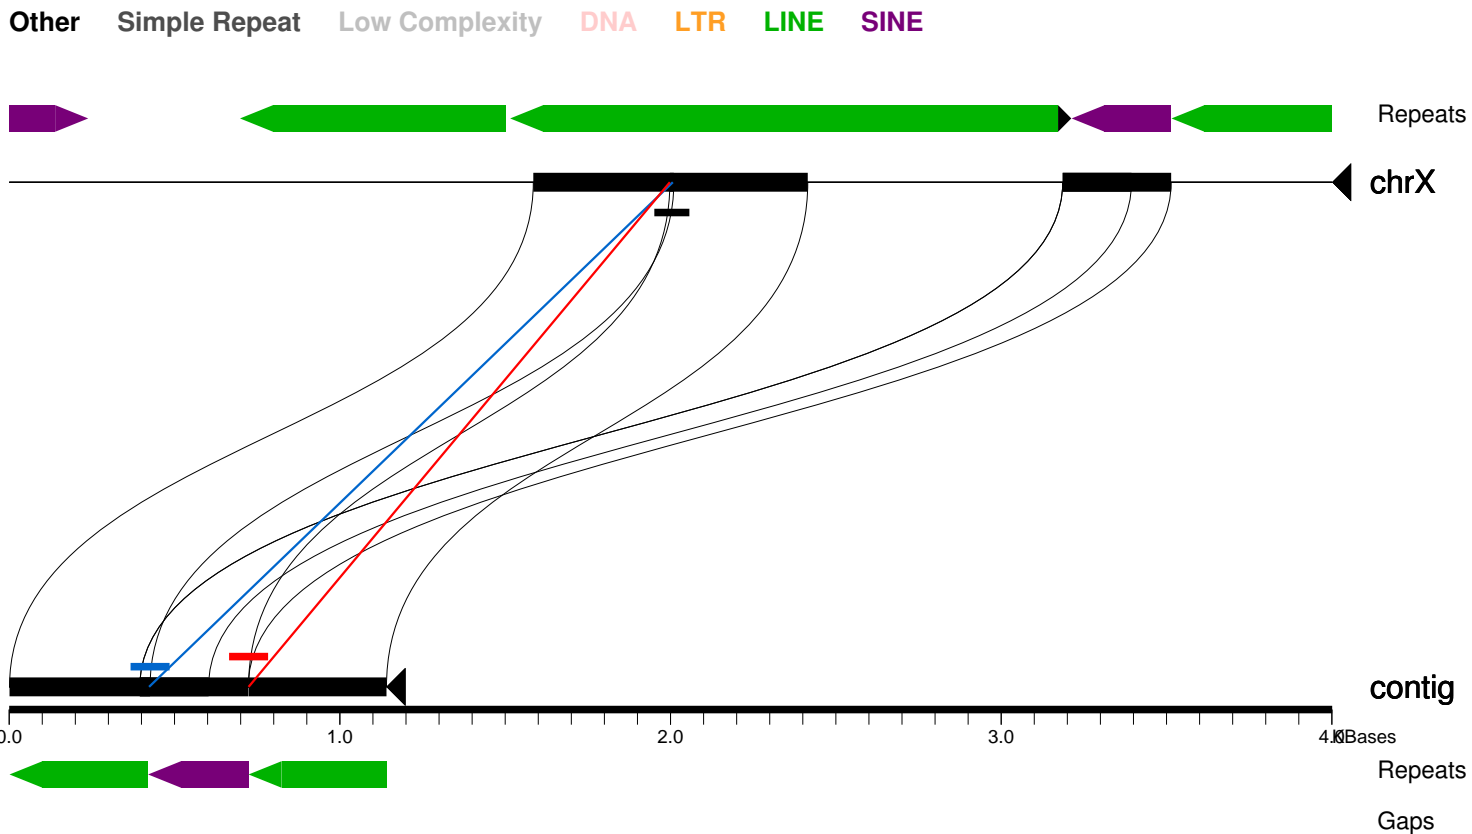



siteID: chrX\_136957311 Scaffitig3 - Breakpoint: chrX:136957286

chrX:136957238-136957342

Overlap Length: 12 INS size: 395 Genotyped: No

```
left   ATGTGTCAAAACAATAATGT-----TCTATTCAACTCAGAGCAC----ATTA-----GGGATGAAGTGTG
chrom  ATGTGTCAAAACAATAATGT-----TCTATTCAACTCAGAGCAC----ATTA-----GGGATGAAGTGTG
right  ATCTCCTGACCTCGTGATCCGCCGCTCTCGGCCTCCCAAAGTGCTGGGATTACAGGCCTGAAGAAAGTGTG
      **1*1111*11111*1**1111111***111*11*1**1**11*1111****11111*1**1*****
```

```
left   ATTTTTTTNNNNNNNNNNNNNNNNNNNNNNNNNNNNNNNNNNNNNNNNNNNNNNNNNNNNNNNNNNNNNNNNNN
chrom  ATTT-----AAAATCAGGAAATAAGCCCATTTTGTACTTCTCTGATTACACTGG
right  ATTT-----AAAATCAGGAAATAAGCCCATTTTGTACTTCTCTGATTACACTGG
      ***2222222222222222222222222222222222222222222222222222222222222222222222
```

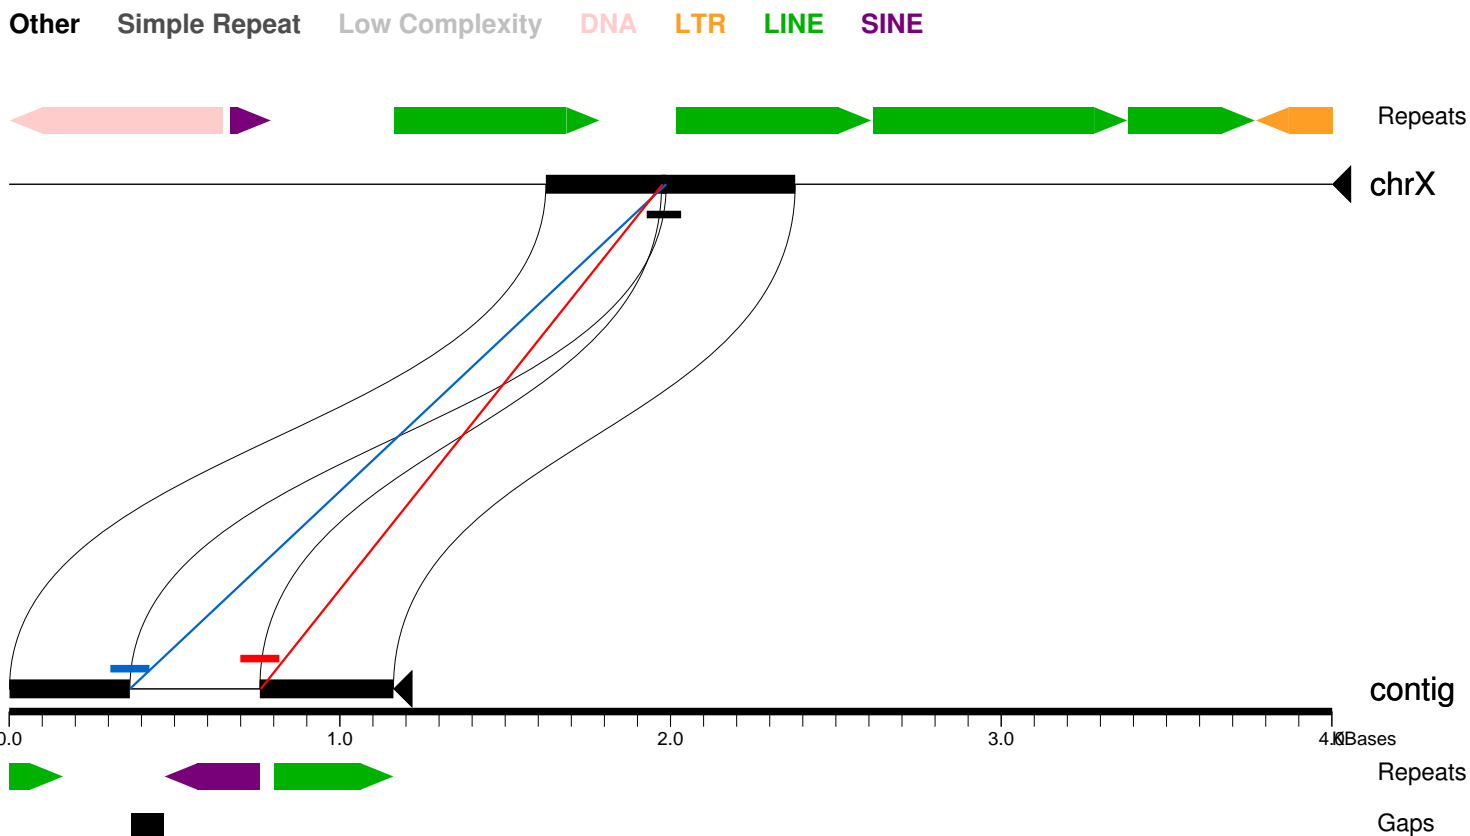





siteID: chrX\_142926117 Scaffitg1 - Breakpoint: chrX:142926114

chrX:142926067-142926172

Overlap Length: 10 INS size: 419 Genotyped: No

```
left  -----GCTTTGTAATATATTTTGAAGTCAGGTAGTGTG---ATGCCTCCAGCTTTGCTCTTTT
chrom -----GCTTTGTAATATATTTTGAAGTCAGGTAGTGTG---ATGCCTCCAGCTTTGCTCTTTT
right CCGCCCGCCTCGGCCTCCCAAAGTGCTGGGATTACAGGC-GTGAGCCACTGCGCCCGGCCT-GCTCTTTT
      111111111111111111**1*111**11*11*11**111****11***1*1111***11**1**1*1*****

left  TTTTNNNNNNNNNNNNNNNNNNNNNNNNNNNNNNNNNNNNNNNNNNNNNNNNNNNNNNNNNNNNNNNNNN
chrom TTGTTTTCAGTATTTCTTTGGCATTTCAGGGTCTTTACGGTTTAAATATAAAAT-----
right TTGTTTTCAGTATTTCTTTGGCATTTCAGGGTCTTTACGGTTTAAATATAAAAT-----
      **2**22222222222222222222222222222222222222222222222222222222222222
```

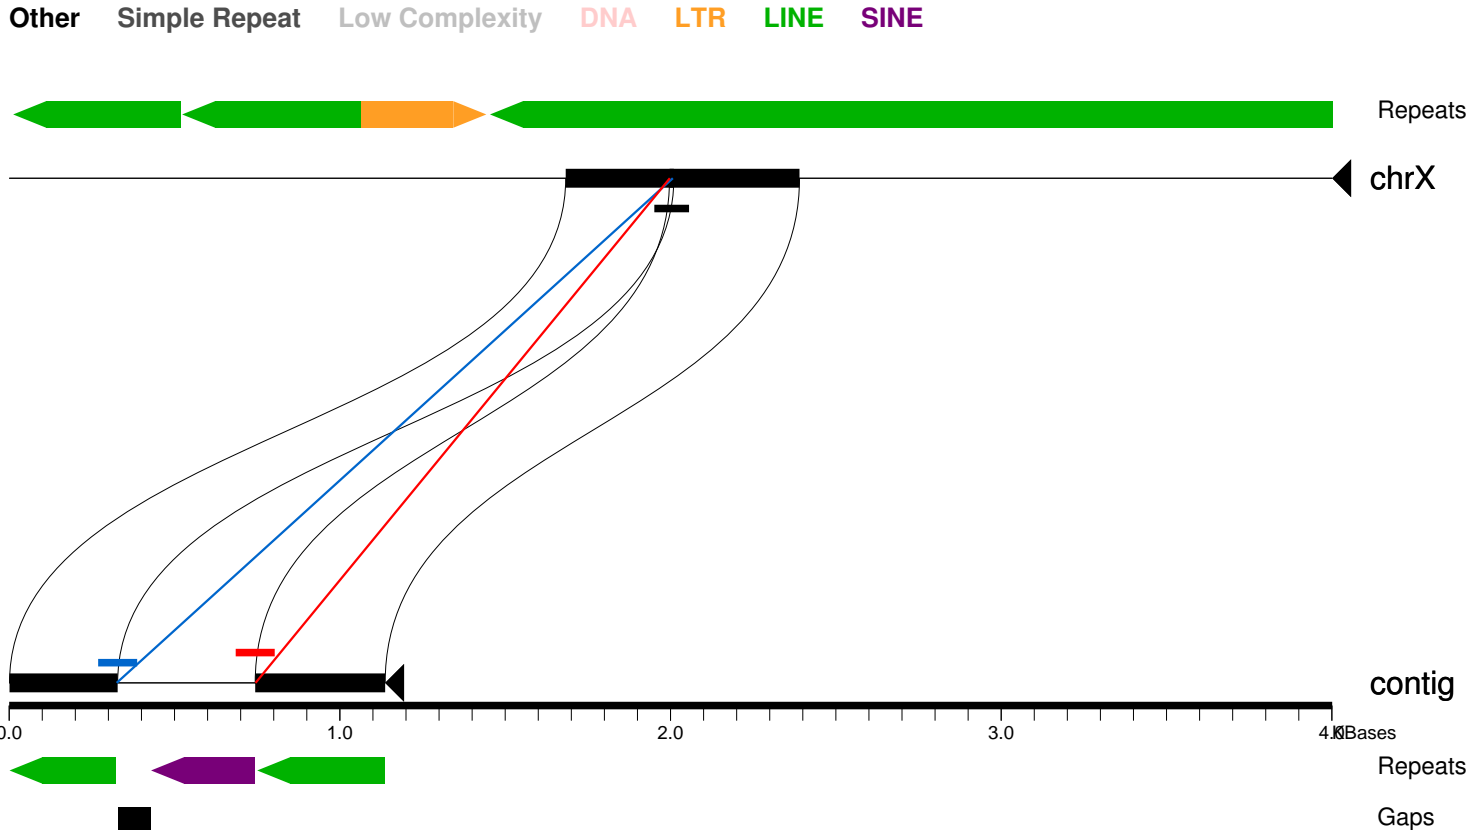





siteID: chrX\_144443234 Scaffitg1 + Breakpoint: chrX:144443219

chrX:144443171-144443278

Overlap Length: 12 INS size: 299 Genotyped: Yes

```
left   TACCTCATTAAGA---TAAAAGAG---GAAATACAACCTAG---CACTGTGGTTTA--TCAATGACTTT
chrom  TACCTCATTAAGA---TAAAAGAG---GAAATACAACCTAG---CACTGTGGTTTA--TCAATGACTTT
right  CCGCCCGCCTCGGCCTCCCAAAGTGCTGGGATTACAGGCGTGAGCCACCGCGCCCGGCC-TCAATGACTTT
      111*1*111111*111111****1*111*1*1****11*11*111***1*1*1111111*****
```

```
left   TTTTTTTTTTTTTTTTTTTTTTGGAGACGGAGTCTCGCTCTGTCGCCAGGCTGGAGTGCAGTG
chrom  TAAAAGAG-----ATCTGACAACCTGGAAAATATATTTTTTAAAGTATATATTTAT---
right  TAAAAGAG-----ATCTGACAACCTGGAAAATATATTTTTTAAAGTATATATTTAT---
      *2222222222222222*2***2*2222*222222*2*2*22222*22*22*2*222222
```

Other Simple Repeat Low Complexity DNA LTR LINE SINE

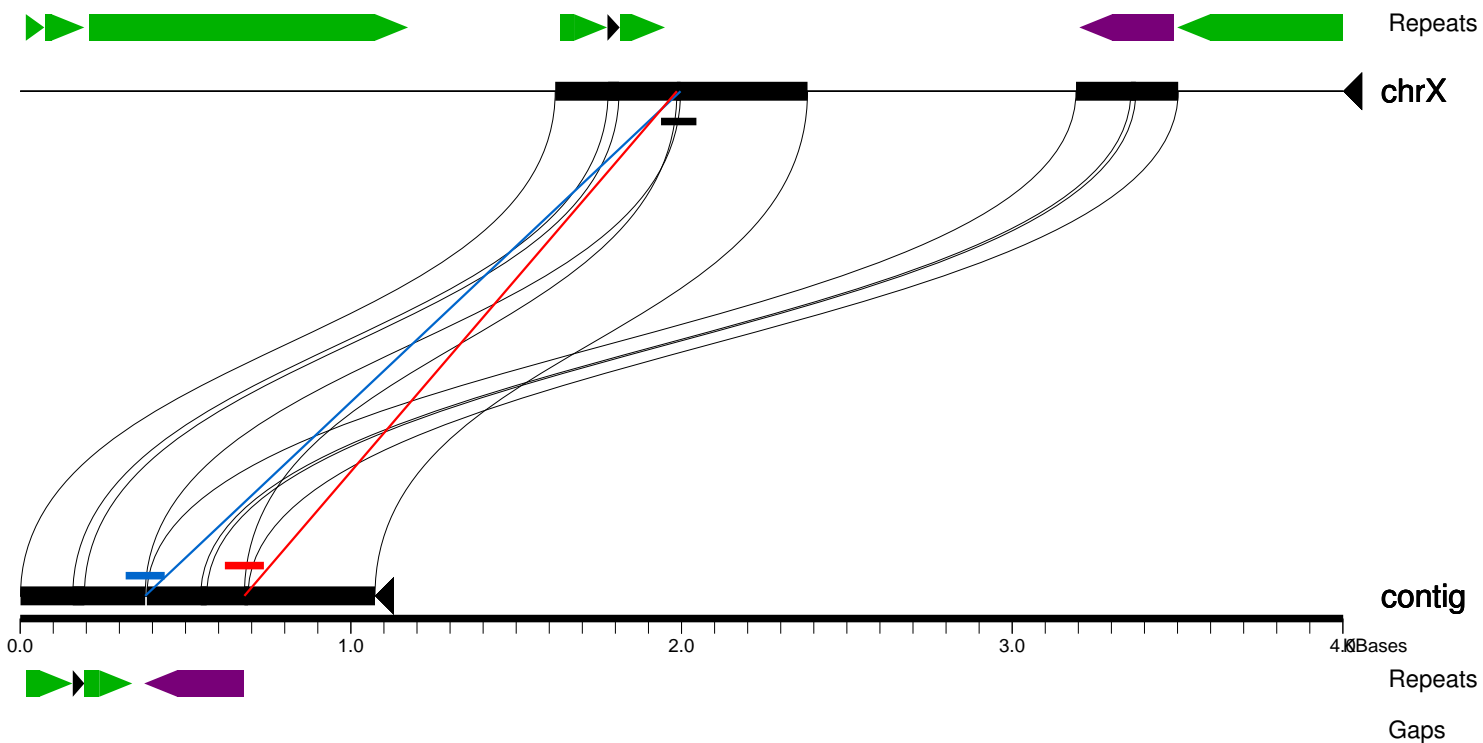

siteID: chrX\_145539109 Scaffitg7 - Breakpoint: chrX:145539108

chrX:145539060-145539164

Overlap Length: 12 INS size: 313 Genotyped: Yes

```
left  AATAGAAACTACAAAGCAA----CCAGCT-----AACAACTTCACGATAGTATCAAA--ACTTCACC
chrom AATAGAAACTACAAAGCAA----CCAGCT-----AACAACTTCACGATAGTATCAAA--ACTTCACC
right AGCCTGGGCGACAGAGCGAGACTCCGTCTCAAAAAAAAAAAAAAAAAAAAAAAAAAAAAAACAATAACTTCACC
      *11111111*1***1***1*1111*11**11111111**1**1111*11*1*11*1****11*****
```

```
left  TATCGGCCGGGCGCGGTGGC-TCATGCCTGTAATCCCAGCACTTTGGGAGGCTGAGGCGGGCGG
chrom TATCAATATAAACCTTAAGTGTTAATCGTCTAAACGCACCACTTAAAA-----G
right TATCAATATAAACCTTAAGTGTTAATCGTCTAAACGCACCACTTAAAA-----G
      ***222222222*2222*22*2*22*2*2***2*2*2*****222222222222222222*
```

Other Simple Repeat Low Complexity DNA LTR LINE SINE

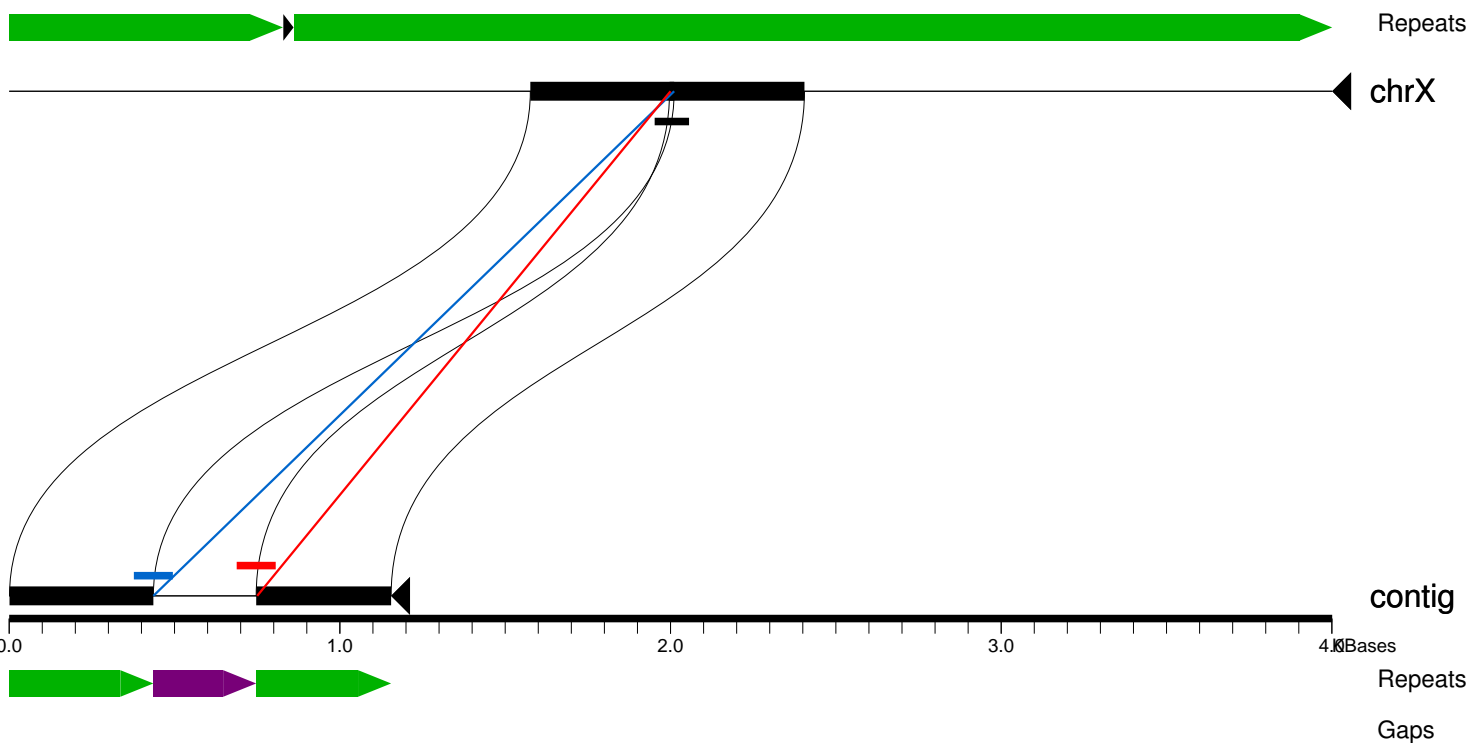

siteID: chrX\_148539099 Scaffitig 1 - Breakpoint: chrX:148539112

chrX:148538952-148539275

Overlap Length: 4 INS size: 318 Genotyped: Yes

left T-----CACTGGGTTGAATCCACCTCAGTCTGGTTGTTACCAAACCGCATTACTAAGGTTTAACTTCTAA  
chrom TGAGGTCACCTGGGTTGAATCCACCTCAGTCTGGTTGTTACCAAACCGCATTACTAAGGTTTAACTTCTAA  
right -GCGTGAACCCGG--GAAGCGG----AG-CTTGCACTGAGC----CG-----AGATTGCGCCACTGC  
12N2NN1\*\*11\*\*11\*\*\*1\*111111\*\*1\*\*1\*11\*\*1\*1\*1111\*\*11111111\*\*1\*\*111\*11\*\*11

left ATACCAAAGTTTCAGGGCATCGAGAGAAGAGGGGAGAAAAGTGGTACTGAGGCACTGAATGGAGACAGAGG  
chrom ATACCAAAGTTTCAGGGCATCGAGAGAAGAGGGGAGAAAAGTGGTACTGAGGCACTGAATGGAGACAGAGG  
right AGTCCGCAGTCT---GGCCTGG-----GCGACAGAGCGAGACTCCGTCTCAAAAAAAAAAAAAAAAAA  
\*11\*\*11\*\*\*1\*111\*\*1\*1\*1111111111\*1\*\*1\*1\*\*1\*11\*\*11\*1\*1\*11\*\*111\*1\*1\*1\*11

left GGAGATGGGTTGACCAGAACTCTCGG--GCCGGGCGCGGTGGCT-CACGCCTGTAATCCCAG----CACT  
chrom GGAGATGGGTTGACCAGAACTCTCAGCAGCTAGGCCAATTTGGGTTCTAGATTCCAAAGAAAAGAGGTCCAT  
right AAAAA-----AAAAAAAATCTCAGCAGCTAGGCCAATTTGGGTTCTAGATTCCAAAGAAAAGAGGTCCAT  
11\*1\*11111111\*11\*1\*\*1\*\*\*2\*22\*\*22\*\*\*2222\*\*\*2\*2\*22\*22\*22\*\*2222\*\*2222\*22\*

left T-----TGGGAGGCCGAGGCGGGTGG-----ATC-ATGAGG----TCAGGAGATCGAGACCAT-----C  
chrom TATTGCTGGGATGCCCAGAATTATTGTCCCAAATCCACTAGAAGCTTGTGGGAATTAACACTCTTTATTC  
right TATTGCTGGGATGCCCAGAATTATTGTCCCAAATCCACTAGAAGCTTGTGGGAATTAACACTCTTTATTC  
\*22222\*\*\*\*\*2\*\*\*2\*\*22222\*2\*22222\*\*\*2\*22\*\*22222\*22\*\*22\*\*22\*2\*\*22\*22222\*

left CTGGCTAACAAGGTGAAA-----CCCCGTCT-CTAC---TAAA  
chrom TTTTTTTAAGCTGTGAAAATATCTGCAGCGTGTCTTTGGGATAAAA  
right TTTTTTTAAGCTGTGAAAATATCTGCAGCGTGTCTTTGGGA-----  
2\*222\*2\*2222\*\*\*\*\*222222\*22\*\*\*2\*2\*\*222221111

Other Simple Repeat Low Complexity DNA LTR LINE SINE

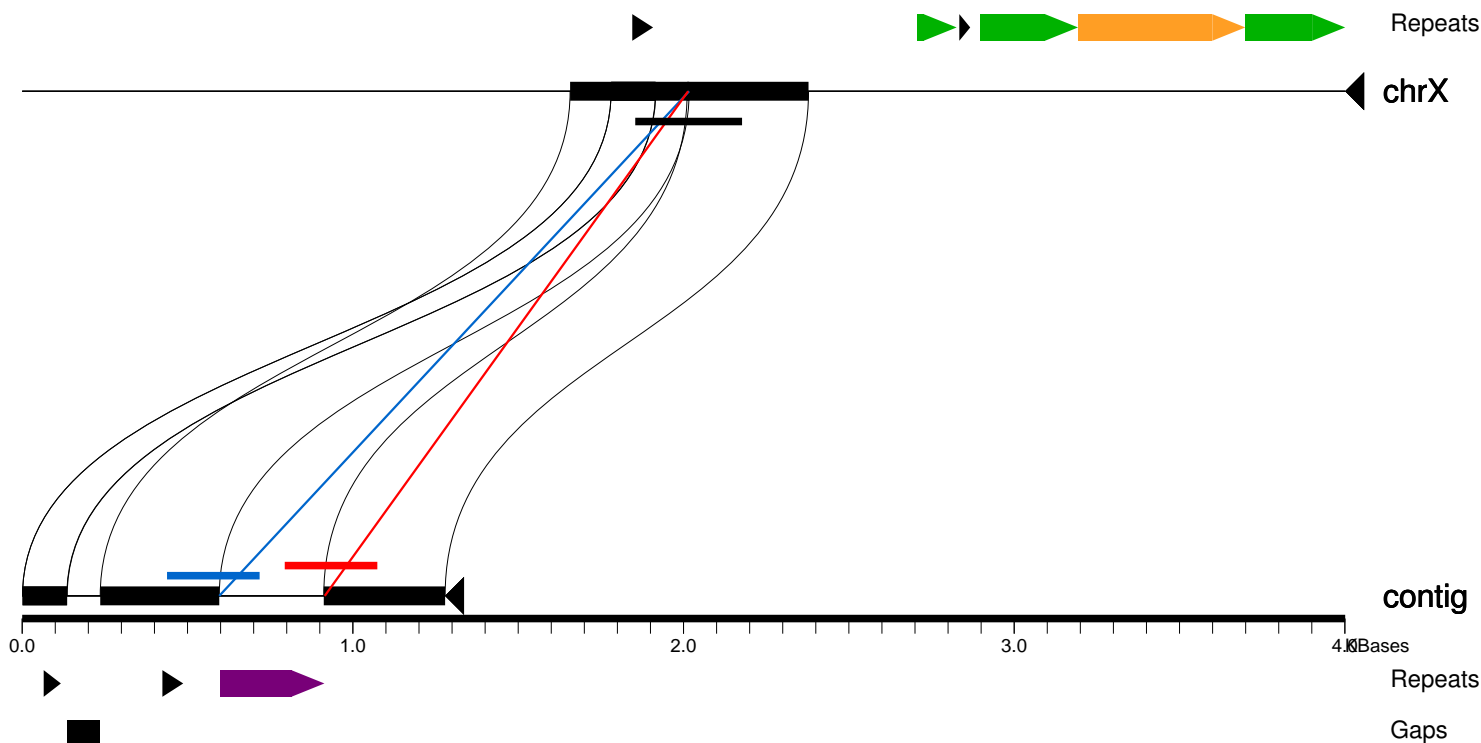



siteID: chrX\_1683497 Scaffitg1 + Breakpoint: chrX:1683504

chrX:1683344-1683674

Overlap Length: 11 INS size: 326 Genotyped: Yes

```
left  -----GGCGTTGGGAGAGGGGGGAGGGAGAGCATTAGGAGATATACCTAGTGTAAATGACGAGTTAATGG
chrom CGTGGGGCGTTGGGAGAGGGGGGAGGGAGAGCATTAGGAGATATACCTAGTGTAAATGACGAGTTAATGG
right TTT-----TAGTAGAGACGGG--GTTTCACCTTGTTAGCCAGGA-TGGTCTCGATCTCCTGACCTCGT
NN2   11111*1*1***11***11*11111*1**111**11*1111*1**1*11**11*11*11111*1
```

```
left  GTGCAGCACACCAACATGGCACATGTATACGTATGTAACAAACCTGCACGTTGTGCACACGTACCCTAGA
chrom GTGCAGCAAACCACCATGGCACATGTATACGTATGTAACAAACCTGCACGTTGTGCACACGTACCCTAGA
right GATCCGC---CCGCCTCGGCC-----TCCCAAAG-TGCTGGGATTACAGGCGTGAGCCACC
*11*1**1N1**12*11***111111111111111*11***11***11*111*1**11***111*1*11
```

```
left  ACTTAAAGGATAAAAAATTTAAAAAATTTTTTTTTTTTTTTTTTTTTTTTTTTTTTTTTTTTTTTT-----TTTT--
chrom ACTTAAAGGATAAAAAATTTA*****TTTTT*****TGGGGCTGAGGGTGTGGGTGGGGAAGCTCATGA
right GCGCCCGGCA-----A*****TTTTT*****TGGGGCTGAGGGTGTGGGTGGGGAAGCTCATGA
1*11111*1*11111111111******2*****222222*22222*22222*2*222*22222222*22*22
```

```
left  -----TTTTTTTTTTGAGACGGAGTCTCGCTCTGTCGCCAGGTC---GACTGCG-GACTGC----AGT
chrom ACAGCCTCAGCTCTTCCAGTGGAGCTTTGCTGTGGGCAGAAAGGTCAATGTCTTCCCGAATTCCACATT
right ACAGCCTCAGCTCTTCCAGTGGAGCTTTGCTGTGGTCAGAAGGTCAATGTCTTCCCGAATTCCACATT
222222*2222*2**22222****22*2***2**2N2222*****222*22**2*221*2*2*2222*2*
```

```
left  GGCGCAATCTCG-----GCTCACTGCAAGCTCC-----GC
chrom GATGTAACCACCAACAAGATGATGTTAAGAGGCTTTGGGAGGTGACGAGGT
right GATGTAACCACCAACAAGATGATGTTAAGAGGCTTTGGG-----
*22*2**2*2*222222*2*2*2222**222*222222 1N
```

Other Simple Repeat Low Complexity DNA LTR LINE SINE

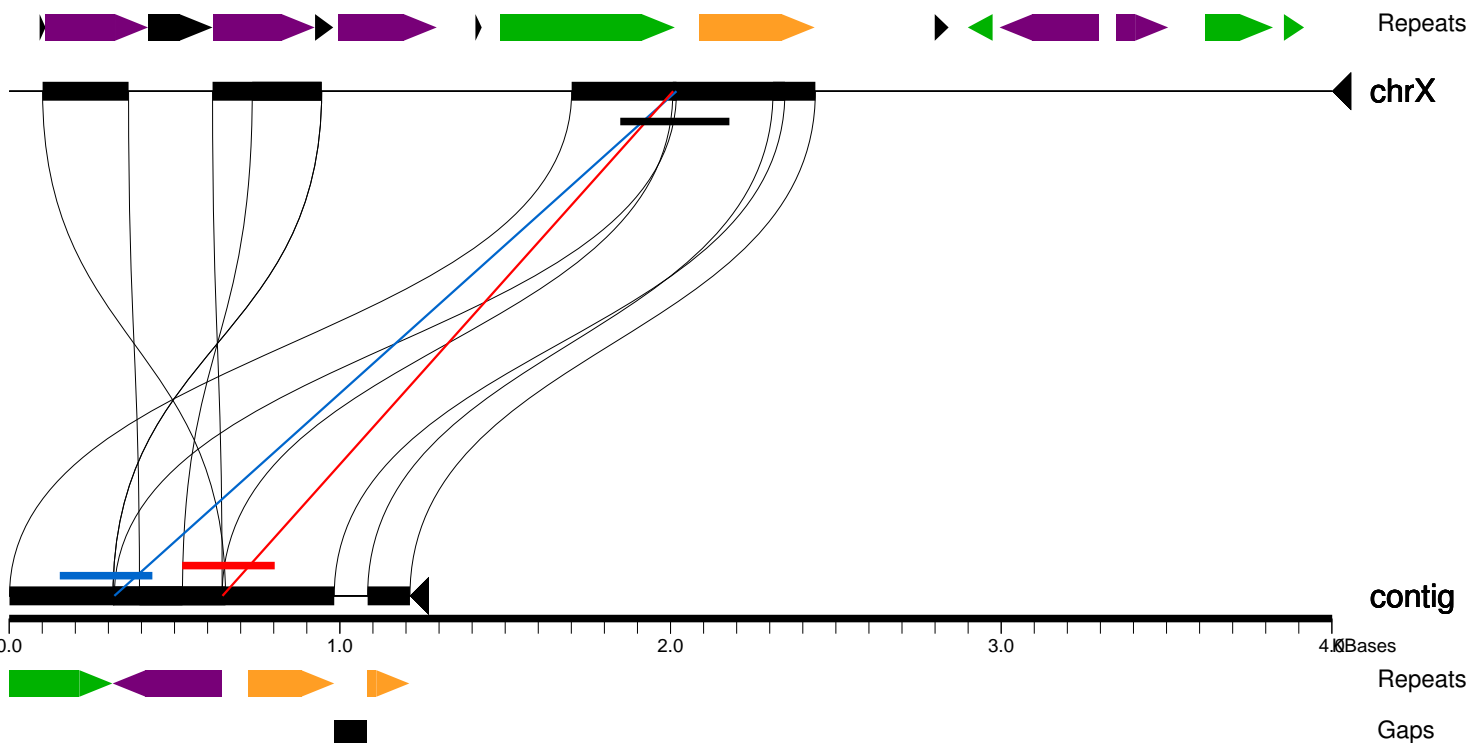

siteID: chrX\_22365095 Scaffitig1 - Breakpoint: chrX:22365072

chrX:22365015-22365128

Overlap Length: 3 INS size: 421 Genotyped: No

```
left    CTCTCATTAAAGCATAAATATTCCTCCACGTTTC----ATCTACAT---TGTAGTATGGGCCAATGCTTCNNN
chrom   CTCTCATTAAAGCATAAATGTTCTCCACGTTTC----ATCTACAT---TGTAGTATGGGCCAATGCTTCCTTT
right   GA-TCCGCCCGCCTCGGCCTCCCAAAGTGCTGGGAT-TACAGGCGTGAGCCACCGCGCCCGGCCTCCTTT
        111**11111**1*111N1**1*1*1**1*1111**1****1111**1111*11*11*111**1**222

left    NNNNNNNNNNNNNNNNNNNNNNNNNNNNNNNNNNNNNNNNNNNNNNNNNNNNNNNNNNNNNNNNNNNNNNNNN
chrom   CTTTTTATGGATGAATAAATATTCATTTTACGGATACACAACATTTTGT---
right   CTTTTTATGGATGAATAAATATTCATTTTACGGATACACAACATTTTGT---
        22222222222222222222222222222222222222222222222222222222222222222222
```

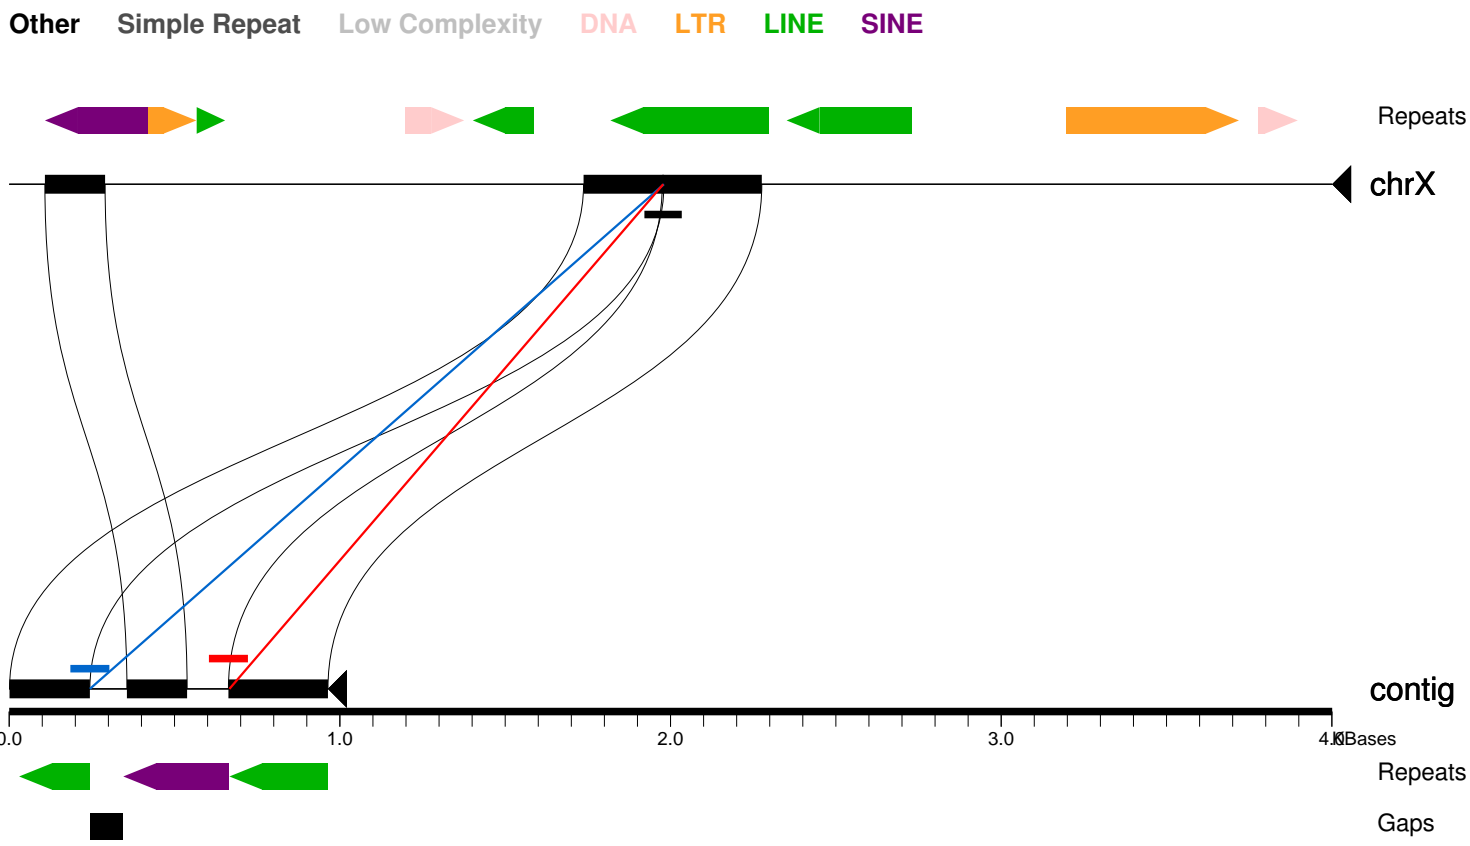

siteID: chrX\_24451510 Scafftig1 + Breakpoint: chrX:24451542

chrX:24451498-24451601

Overlap Length: 16 INS size: 94 Genotyped: Yes

```
left  GCCTAGGAA-----AGGAGG-AGAGATAAGGCTCACTAGCCACAGAAAAACAGGCAGT
chrom GCCTAGGAA-----AGGAGG-AGAGATAAGGCTCACTAGCCACAGAAAAACAGGCAGT
right TGAGACGGAGTCTCGCTCTGTGGCCCAGGCGGGAGTGCAGTGGCGCAAT---CTCGGCTCACAGGCAGT
      1111*1*1*11111111111111111111***1**1**1*1111***1**1*111*1*1*111*1*****
left  TAATTTTTF
chrom TAATTTTAAAGGACTCCAGCTCTTTC-----TCTTTCTCAGGGGGAAT-----TGGGTTTT
right TAATTTTAAAGGACTCCAGCTCTTTC-----TCTTTCTCAGGGGGAAT-----TGGGTTTT
      *****222222*22222*2***2222222222*2***2*2**22***2*22222*22**222
```

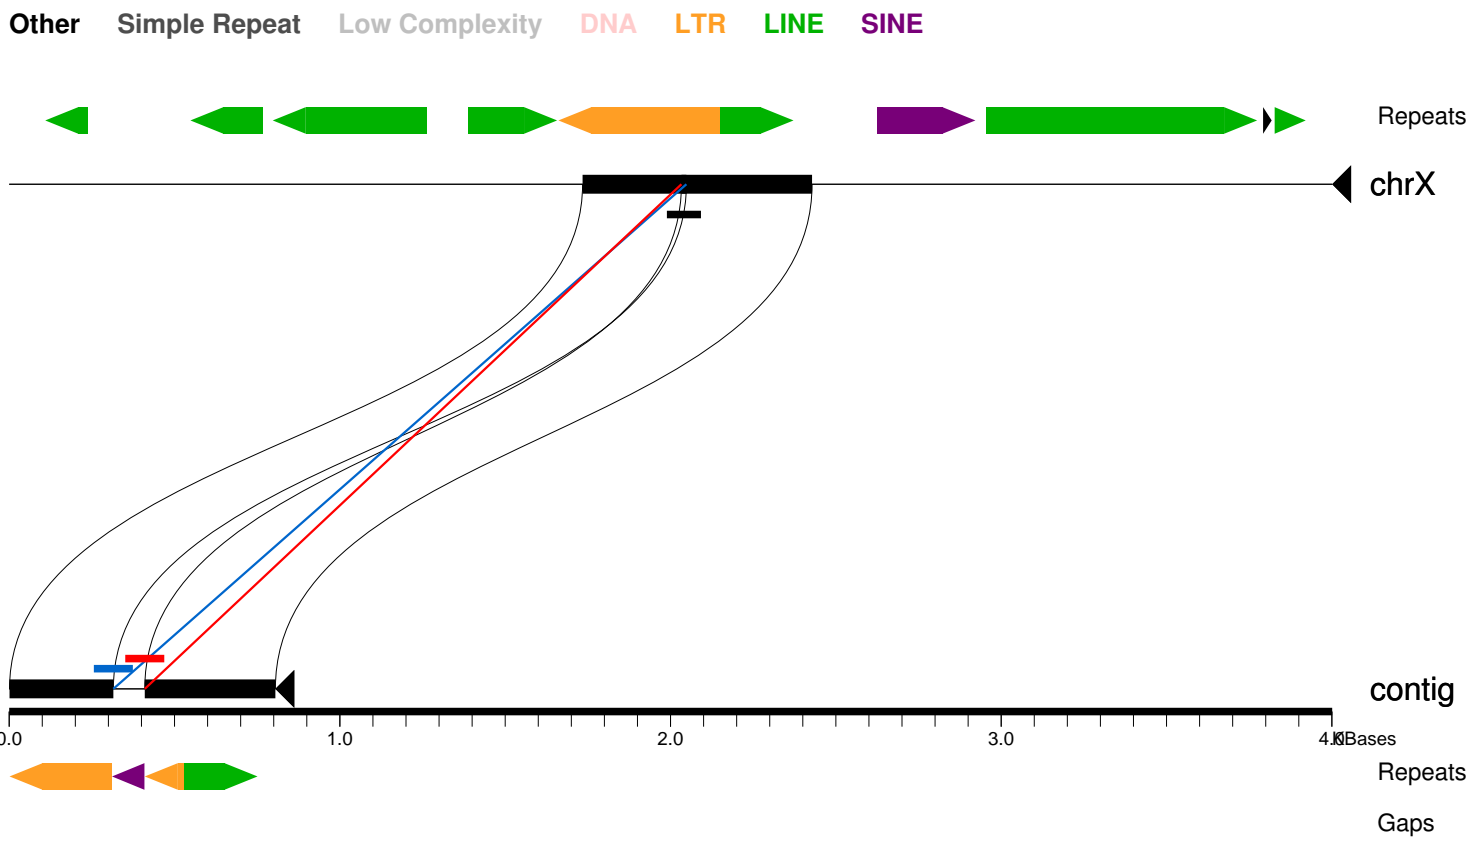



siteID: chrX\_32001073 Scaffitig1 + Breakpoint: chrX:32001073

chrX:32001027-32001132

Overlap Length: 11 INS size: 477 Genotyped: No

```
left      T-----TTTATTCTTTCTCAAGTA-----ACATTATTCAGCTCCTCTAATATAAATTCAGAGCTTT
chrom     T-----TTTATTCTTTCTCAAGTA-----ACATTATTCAGCTCCTCTAATATAAATTCAGAGCTTT
right    CCGCCCGCCTCGGCCTCCCAAAGTGCTGGGATTACAGGCGTGAGCCAC-CGCACCTGGCCTCAGAGCTTT
          1111111111*111*1*1*11****1111111111***1111*1***11*1*11*11*1111*****
```

```
left      TTTTTTTTTNNNNNNNNNNNNNNNNNNNNNNNNNNNNNNNNNNNNNNNNNNNNNNNNNNNNNNNNNNNNNNNN
chrom     TGTTAAT-----GGTATTTTTCTACATACTAGTTTTGAATAAAATTCATGTCTACC
right    TGTTAAT-----GGTATTTTTCTACATACTAGTTTTGAATAAAATTCATGTCTACC
          *2**22*22222222222222222222222222222222222222222222222222222222222222
```

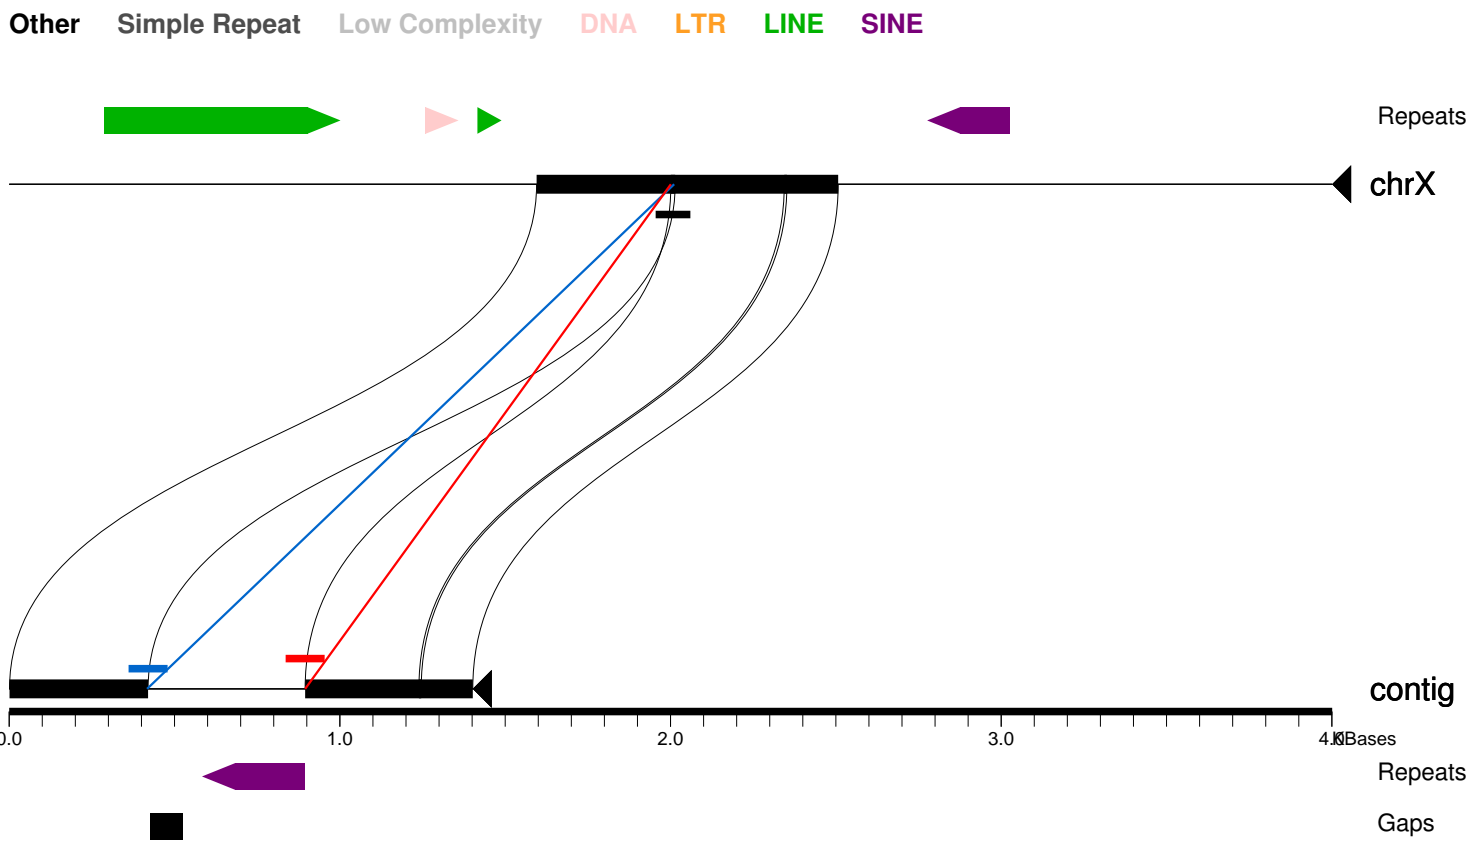



siteID: chrX\_34242456 Scaffitig1 - Breakpoint: chrX:34242444

chrX:34242395-34242503

Overlap Length: 11 INS size: 451 Genotyped: No

```

left  GGCAAGTAATTTTCATGGCTATTTGAAACACAAGAAATAACTCT-----AGAAGTAAAGAAATATG
chrom GGCAAGTAATTTTCATGGCTATTTGAAACACAAGAAATAACTCT-----AGAAGTAAAGAAATATG
right NNNNNNNNNNNNNNNNNNNNNNNNNNNNNNNNNNNNNNNNNNNNNNNNNNNNNNNNNNNNNNNNNNNNN
1111111111111111111111111111111111111111111111111111111111111111111111
*1**11*****

```

  

```

left  GCCGGGCGCGGTGGCTCACGCTTGTAAATCCCAGC-ACTTTGGGAGGCCGAGGCGGGCGGA
chrom -----AGTGATGG---AGAGTTGTA--CCTAGAGAAGCTCTCAGCCTGGAATAATACAT
right -----AGTGATGG---AGAGTTGTA--CCTAGAGAAGCTCTCAGCCTGGAATAATACAT
2222222*2*2***222*222*****22*2**22*222*222**2*2*2222222222

```

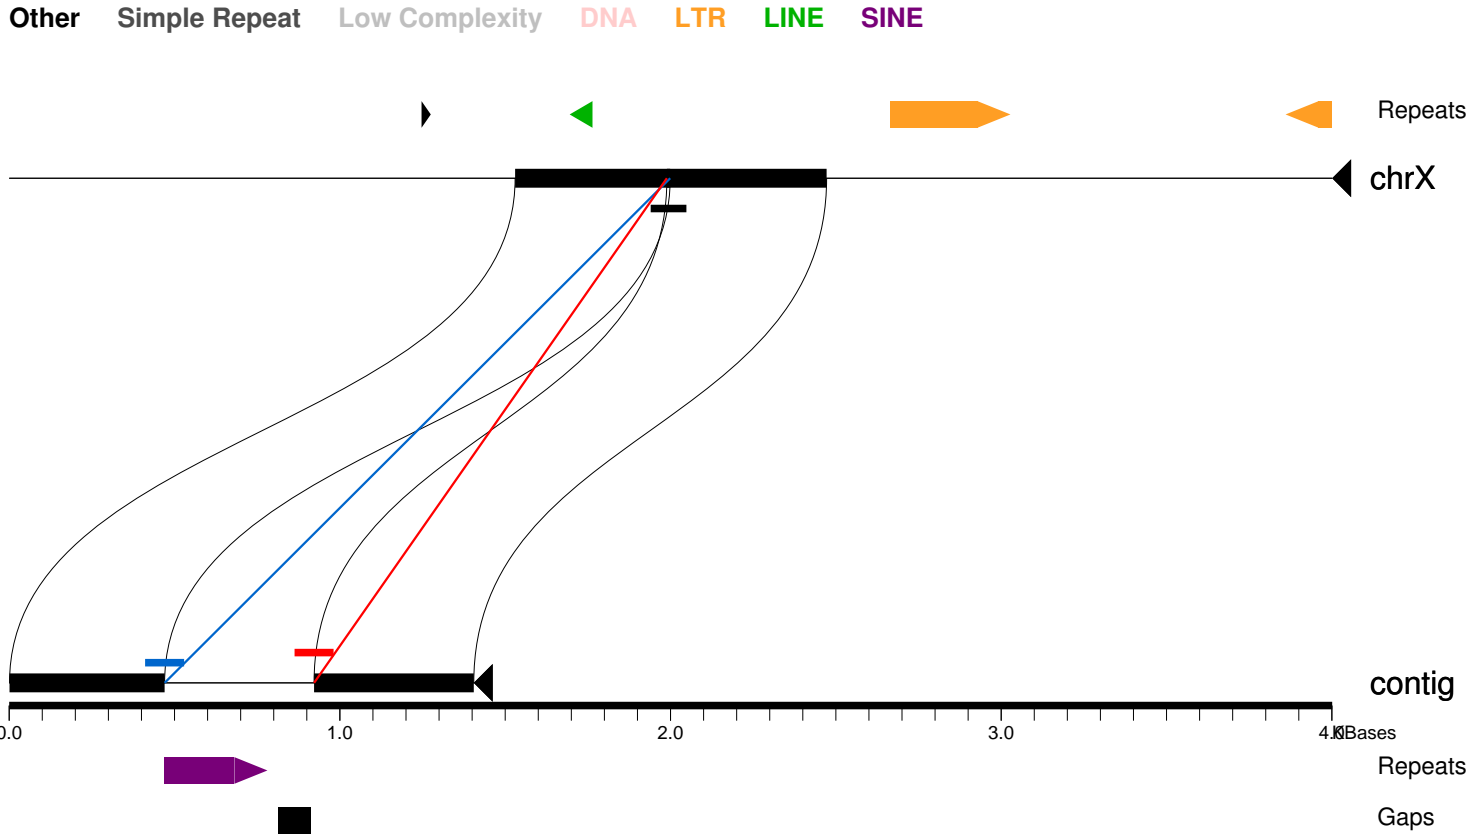

siteID: chrX\_35028081 Scafflig6 + Breakpoint: chrX:35028089

chrX:35027930-35028263

Overlap Length: 15 INS size: 435 Genotyped: No

```
left  -----ATCTGCTTAAGAAGAAATGGGACTTCACCTTCCTGTGTGCTCTTGATTCCCTAGAAAAGC
chrom TGTAATAGTTAAAATCTGCTTAAGAAGAAATGGGACTTCACCTTCCTGTGTGCTCTTGATTCCCTAGAAAAGC
right NNNNNNNNNNNAAA-----AA-----
NNNNNNNNNN22*1111111**1111111111111111111111111111111111111111111111111111
```

```
left  AAGATTTTACTTTTCCTCACTTTGATATAAGATAGACCATTTATTTTCTGGTGAGATTGAGTCAGAGAAAA
chrom AAGATTTTACTTTTCCTCACTTTGATATAAGATAGACCATTTATTTTCTGGTGAGATTGAGTCAGAGAAAA
right -----
111111111111111111111111111111111111111111111111111111111111111111111111
```

```
left  TCAGTACTTGGGTATACTTAAAAACGGCAATGAGGCCGGGCGCGGTGGCTCACGCTTGTA-----ATC-
chrom TCAGTACTTGGGTATACTTAAAAACGGCAATGAGGCCGGGCGCGGTGGCTCACGCTTGTA-----ATC-
right -----A-----
-----A-----
-----A-----
111111111111111111111111111111111111111111111111111111111111111111111111
*****22*222*2222222**2222*2**2*222222***2
```

```
left  --CCAGCACTTTGGGAGGCCGAGCGGGCGGATCACGAGG-----TCAGGAGATCGAGACCATCCT
chrom ATCCAGAATGGTGACATTCCTAG---TGCCTATCTCCAAAAGACCCCACTCAGCTGTCCCAAACACACA
right ATCCAGAATGGTGACATTCCTAG---TGCCTATCTCCAAAAGACCCCACTCAGCTGTCCCAA-----
22****2*222*22*22**2**2222**22***2*2*2222222222****22*22*2*2*111NN1N
```

```
left  GGCTA----ACAC-----GGTGAAACCCCGTCT----CTACTAAA
chrom GGCTGTTTTTATACTACCTAGCCAAAAATATAGGAGGATTCATTTTGCAGACAATTGAT
right -----
1111N      1N11                          11N1N1NN11NN1N1      1N1N1N1N
```

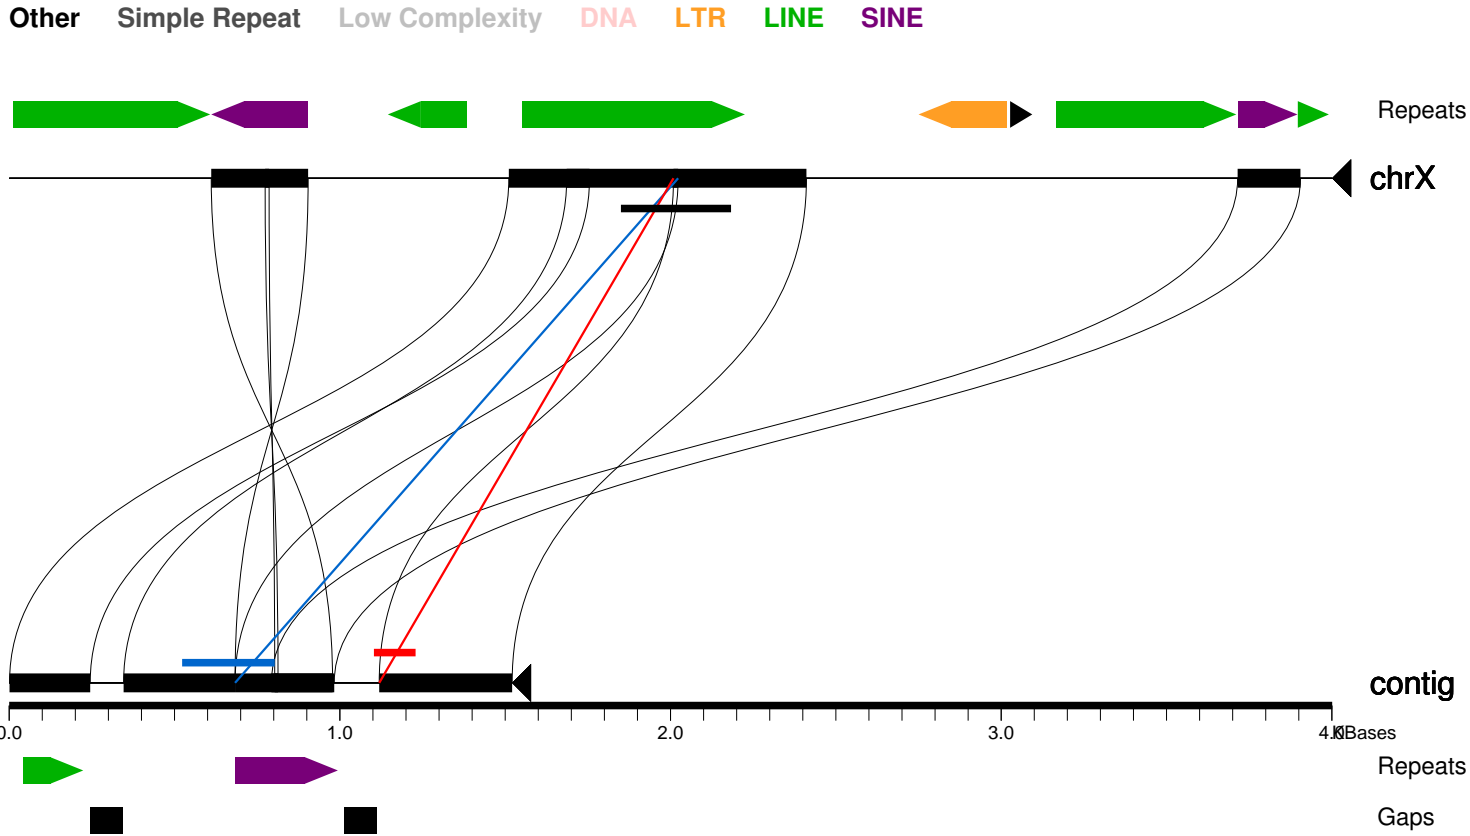

**siteID: chrX\_37324643 Scafftig1 + Breakpoint: chrX:37324634**  
**chrX:37324579-37324693**  
**Overlap Length: 5 INS size: 325 Genotyped: No**

```

left    GACCCCTGGAGCTACCCCTCAGAATCGATGAACTTGTCTTTCTTTTAAAGAACAGT----GATCC-----
chrom   GACCCCTGGAGCTACCCCTCAGAATCGATGAACTTGTCTTTCTTTTAAAGAACAGT----GATCCATAGGT
right   NNNNNNNNNNNNNNNNNNNNNNNNNNNNNNNNNNNNNNNNNNNNNNNNNNNNNNNNNNNNNNNNNNNNNNNNNNN
        111111111111111111111111111111111111111111111111111111111111111111111
        *****222222
  
```

```

left    CATCCTGGCTAACACGGTGAAACCCCGTCTCTACTAAAAATACAAAAAATTAGCCGGGC
chrom   CATGCAGACCTCCTTGATGACATCC----ACAAGTTTGATTGGAAGTATGAG-----
right   CATGCAGACCTCCTTGATGACATCC----ACAAGTTTGATTGGAAGTATGAG-----
        ***2*2*2*222*22*2***2*2**22222*2*2*222*2*22**222**2**222222
  
```

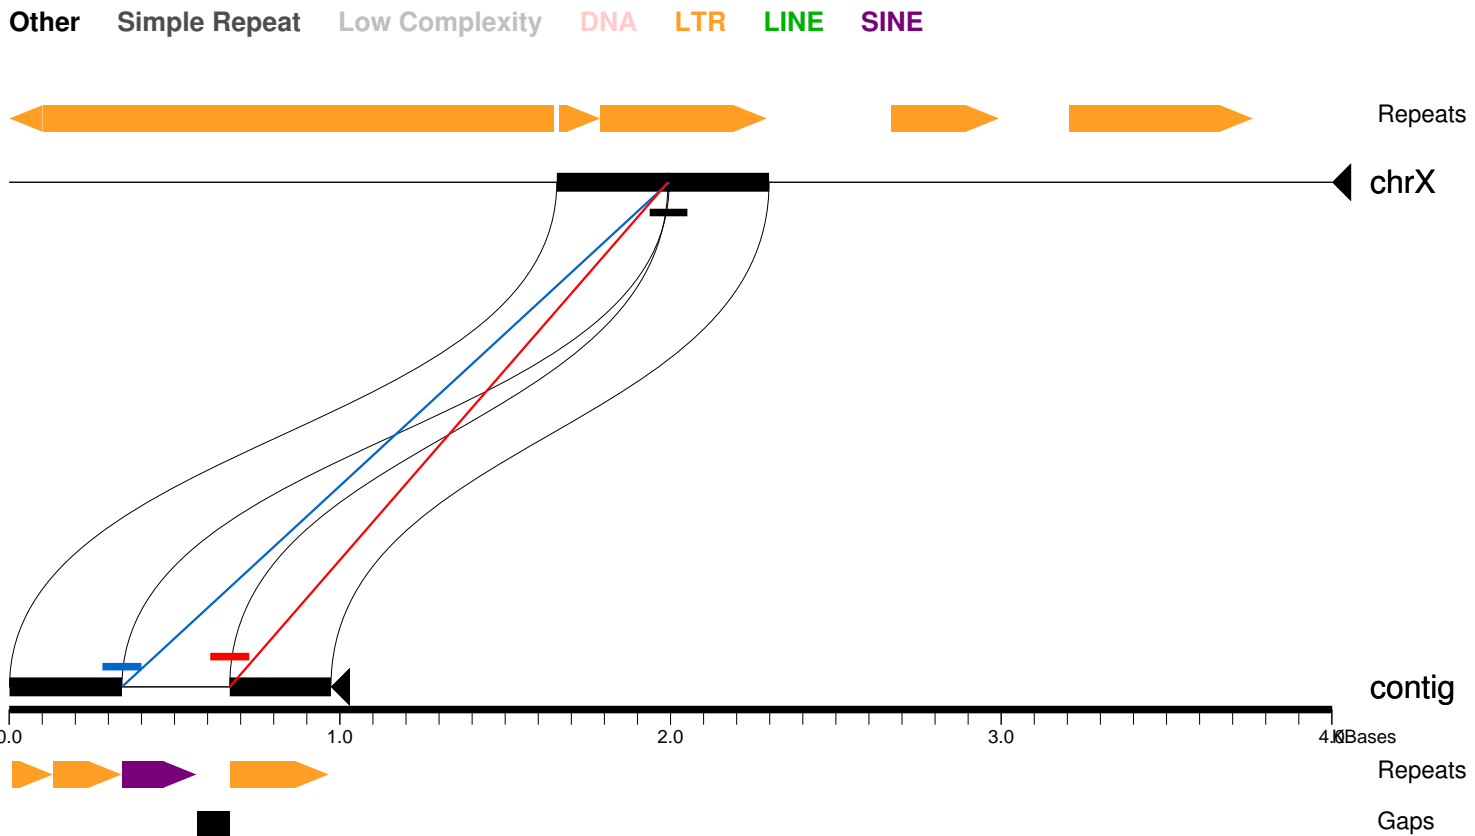



siteID: chrX\_5781750 Scafftig4 + Breakpoint: chrX:5781742

chrX:5781695-5781801

Overlap Length: 1 INS size: 320 Genotyped: Yes

```
left  AGCCAATGTCATTTTGTTTTATAAGGACTAGAGTT---GGAATGAG-----GGATTTTTTTTTT
chrom AGCCAATGTCATTTTGTTTTATAAGGACTAGAGTT---GGAATGAG-----GGATTGCTGTATT
right --CCGCCCCGCTCGGCCTCCCAAAGTGCTGGGATTACAGGCGTGAGCCACCGCGCCCGCCCTGCTGTATT
      11**11111*1*11111*1111***11**1*11**111**11****11111111111**11*22*2*2**

left  TTTTTTTTTTTTTTTTTTTTTTTTTTTTTTTTGGAG-ACGGAGTCTCGCTCTGTGCGCCAGGCTGG
chrom GTTTAGAAGGGGTAGGCACTTAAGCCCAGTTGACCACAAAGA-----TGAGTGCAA-----
right GTTTAGAAGGGGTAGGCACTTAAGCCCAGTTGACCACAAAGA-----TGAGTGCAA-----
      2***22222222*222222**22222222****22**22**22222222**2222*2*222222
```

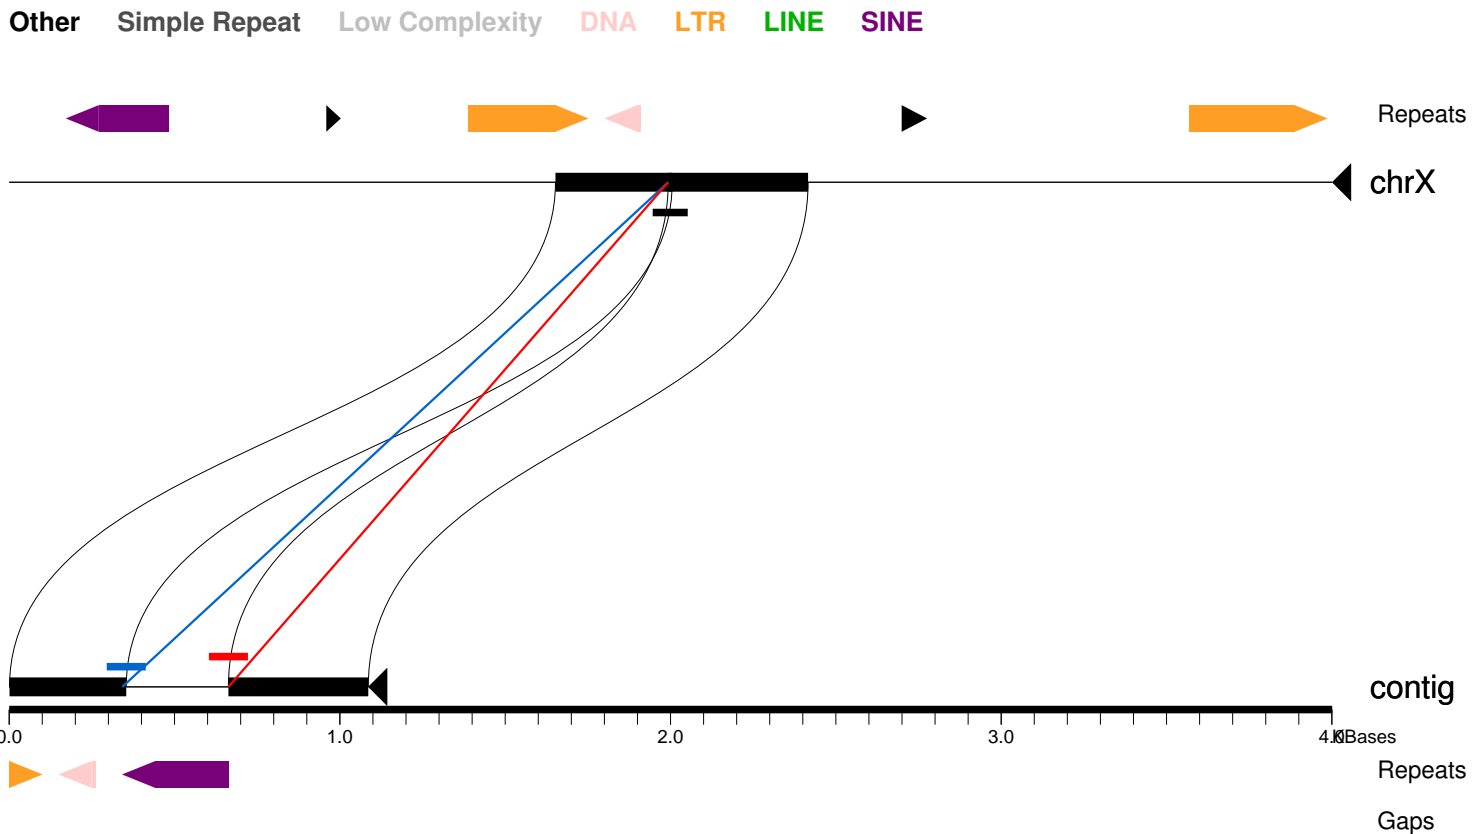









siteID: chrX\_87112828 Scaffitig1 - Breakpoint: chrX:87112817

chrX:87112762-87112876

Overlap Length: 5 INS size: 414 Genotyped: No

```
left   TTTCTTTTAAAGTCATAATTGTAAAA-GGTGTGTTTA-AG--GTAAAAACACAAATATATGCTCANNNNNNN
chrom  TTTCTTTTAAAGTCATAATTGTAAAA-GGTGTGTTTA-AG--GTAAAAACACAAATATATGCTCATTCTGT
right  GATCCGCCCGCCTCGGCCTCCCAAAGTGCTGGGATTACAGGCGTGAGCCACCGCGCCCGCTCATTCTGT
      11**11111111**1111*111***11*1**1*1***1**11**1*11***111111111*****222222
```

```
left   NNNNNNNNNNNNNNNNNNNNNNNNNNNNNNNNNNNNNNNNNNNNNNNNNNNNNNNNNNNNNNNNNNNNNNN
chrom  TTTTGATAAAAGCTCGAGATACAAGCTCATGTGAAATATTTAGTCTATAT----
right  TTTTGATAAAAGCTCGAGATACAAGCTCATGTGAAATATTTAGTCTATAT----
      22222222222222222222222222222222222222222222222222222222222222222222
```

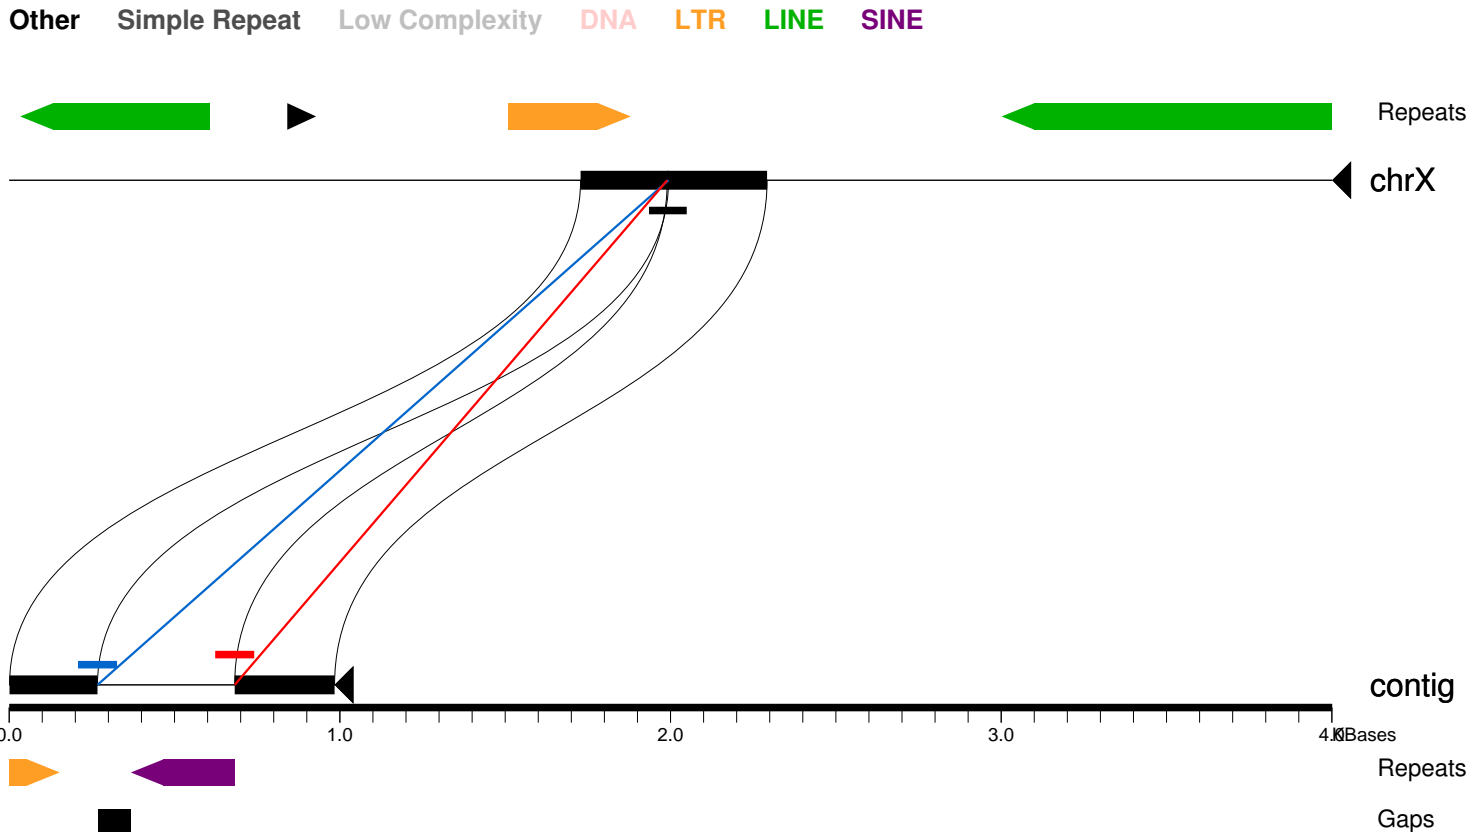

siteID: chrX\_90534142 Scaffitig2 - Breakpoint: chrX:90534150  
chrX:90534098-90534209  
Overlap Length: 3 INS size: 307 Genotyped: No

```

left   TGTTCACAGAAGTTATCTTAGGGCCTCTCATGTCTGCATTAAGAGTGGCAAG-----ACAGATCG---
chrom  TGTTCACAGAAGTTATCTTAGGGCCTCTCATGTCTGCATTAAGAGTGGCAAG-----ACAAAACGGAT
right  NNNNNNNNNNNNNNNNNNNNNNNNNNNNNNNNNNNNNNNNNNNNNNNNNNNNNNNNNNNNNNNNNNNNNNNNN
      111111111111111111111111111111111111111111111111111111111111111111111
      1111111111111111111111111111111111111111111111111111111111111111111
left   --AGACCATCCTGGCTAACAAGGTGAAACCCCGTCTCTACTAAAAATACAAAAAATTAGCC
chrom  AAAAAATAATTCAGTCGACTGAGAAAAAATCT----TTTCCAGAAAAACAAGA-----
right  AAAAAATAATTCAGTCGACTGAGAAAAAATCT----TTTCCAGAAAAACAAGA-----
      22*2*22**2*2*2*2*2*222**222**2*22222*2*2*2*2**2***2***2*22222222

```

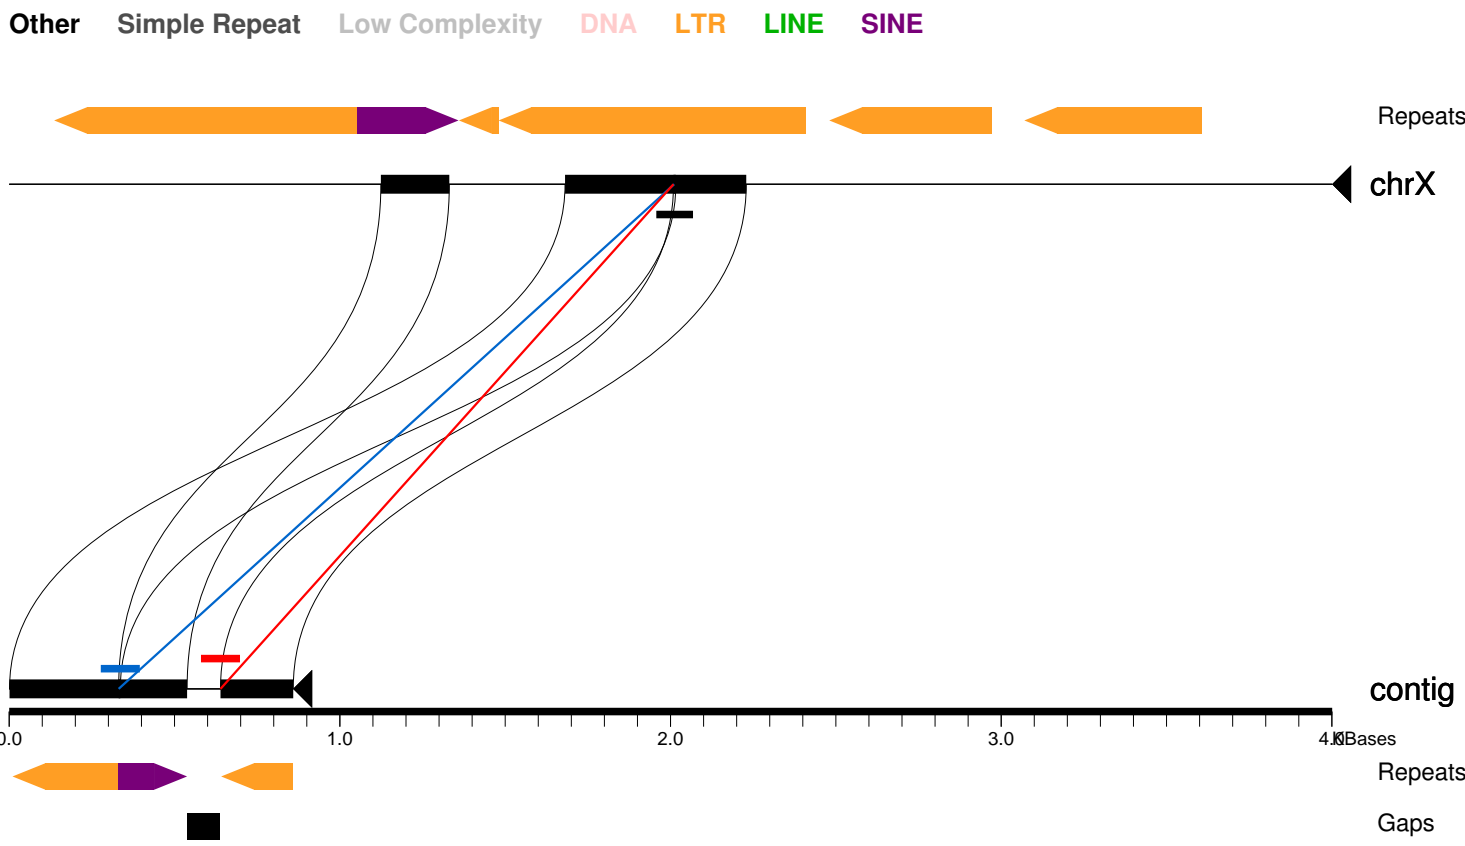



siteID: chrY\_21611998 Scaffitig2 + Breakpoint: chrY:21611993

chrY:21611938-21612052

Overlap Length: 3 INS size: 423 Genotyped: No

```
left      TTCCAGG-GCCAAGTCCAACCAAGTTAAAGTTAAAAACAGGTTTGATCTTCTTATGT-----TATNNNNNNN
chrom     TTCCAGG-GCCAAGTCCAACCAAGTTAAAGTTAAAAACAGGTTTGATCTTCTTATGT-----TATATTTTCT
right    --CCACCCGCCTCGGCCTCCCAAAGTGCTGGGATTACAGGCGTGAGCCACCGCGCCCGGCCATATATTTCT
          11***111***1111**11****11*111*11*11*****11***1*11*111111111111***222222

left      NNNNNNNNNNNNNNNNNNNNNNNNNNNNNNNNNNNNNNNNNNNNNNNNNNNNNNNNNNNNNNNNNNNNNNNNN
chrom     TTATCTTCCCCTGCTATTGCTAGTCCTCTCCTTATTAACGTAACCAGGTCA-----
right    TTATCTTCCCCTGCTATTGCTAGTCCTCTCCTTATTAACGTAACCAGGTCA-----
          22222222222222222222222222222222222222222222222222222222222222222222222222
```

Other Simple Repeat Low Complexity DNA LTR LINE SINE

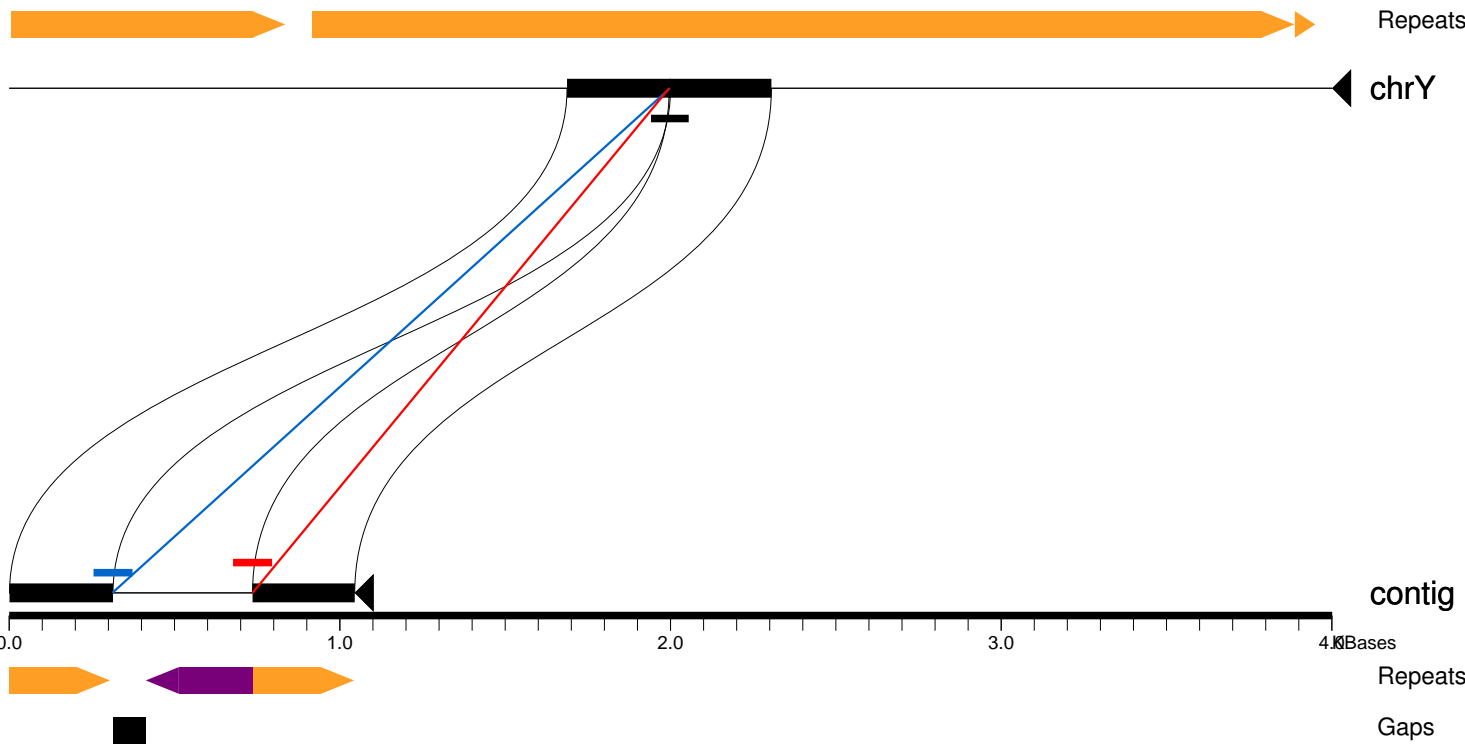

Supplement: supp_gkv1089_nar-01397-h-2015-File006.pdf [file supp_gkv1089_nar-01397-h-2015-File006.pdf]
