# Supplementary material for: Discovery and characterization of Alu repeat sequences via precise local read assembly
Source: PubMed Central journal article supplement (PMC4666360; doi:10.1093/nar/gkv1089), 2015-10-25

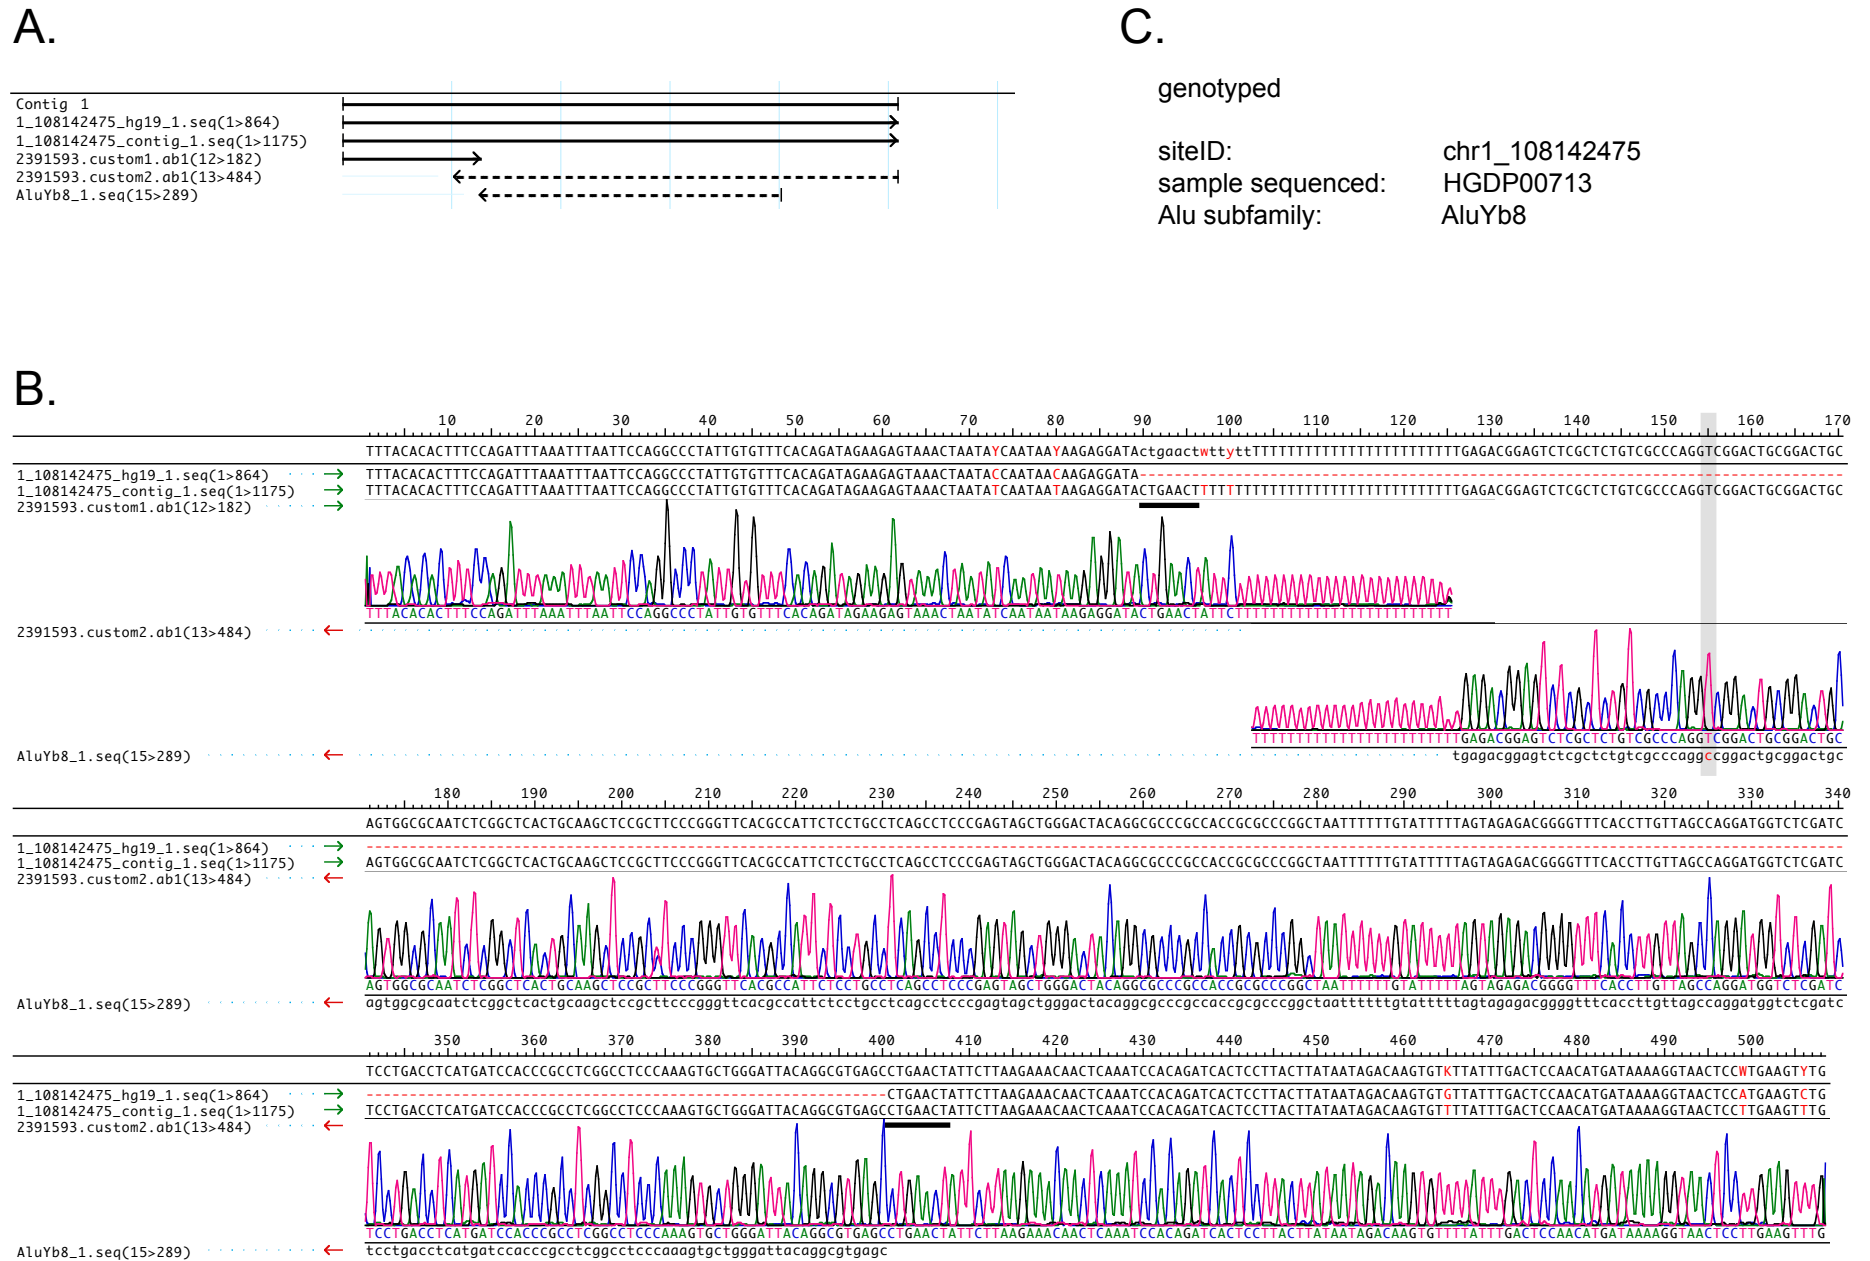

**Figure S5.1**

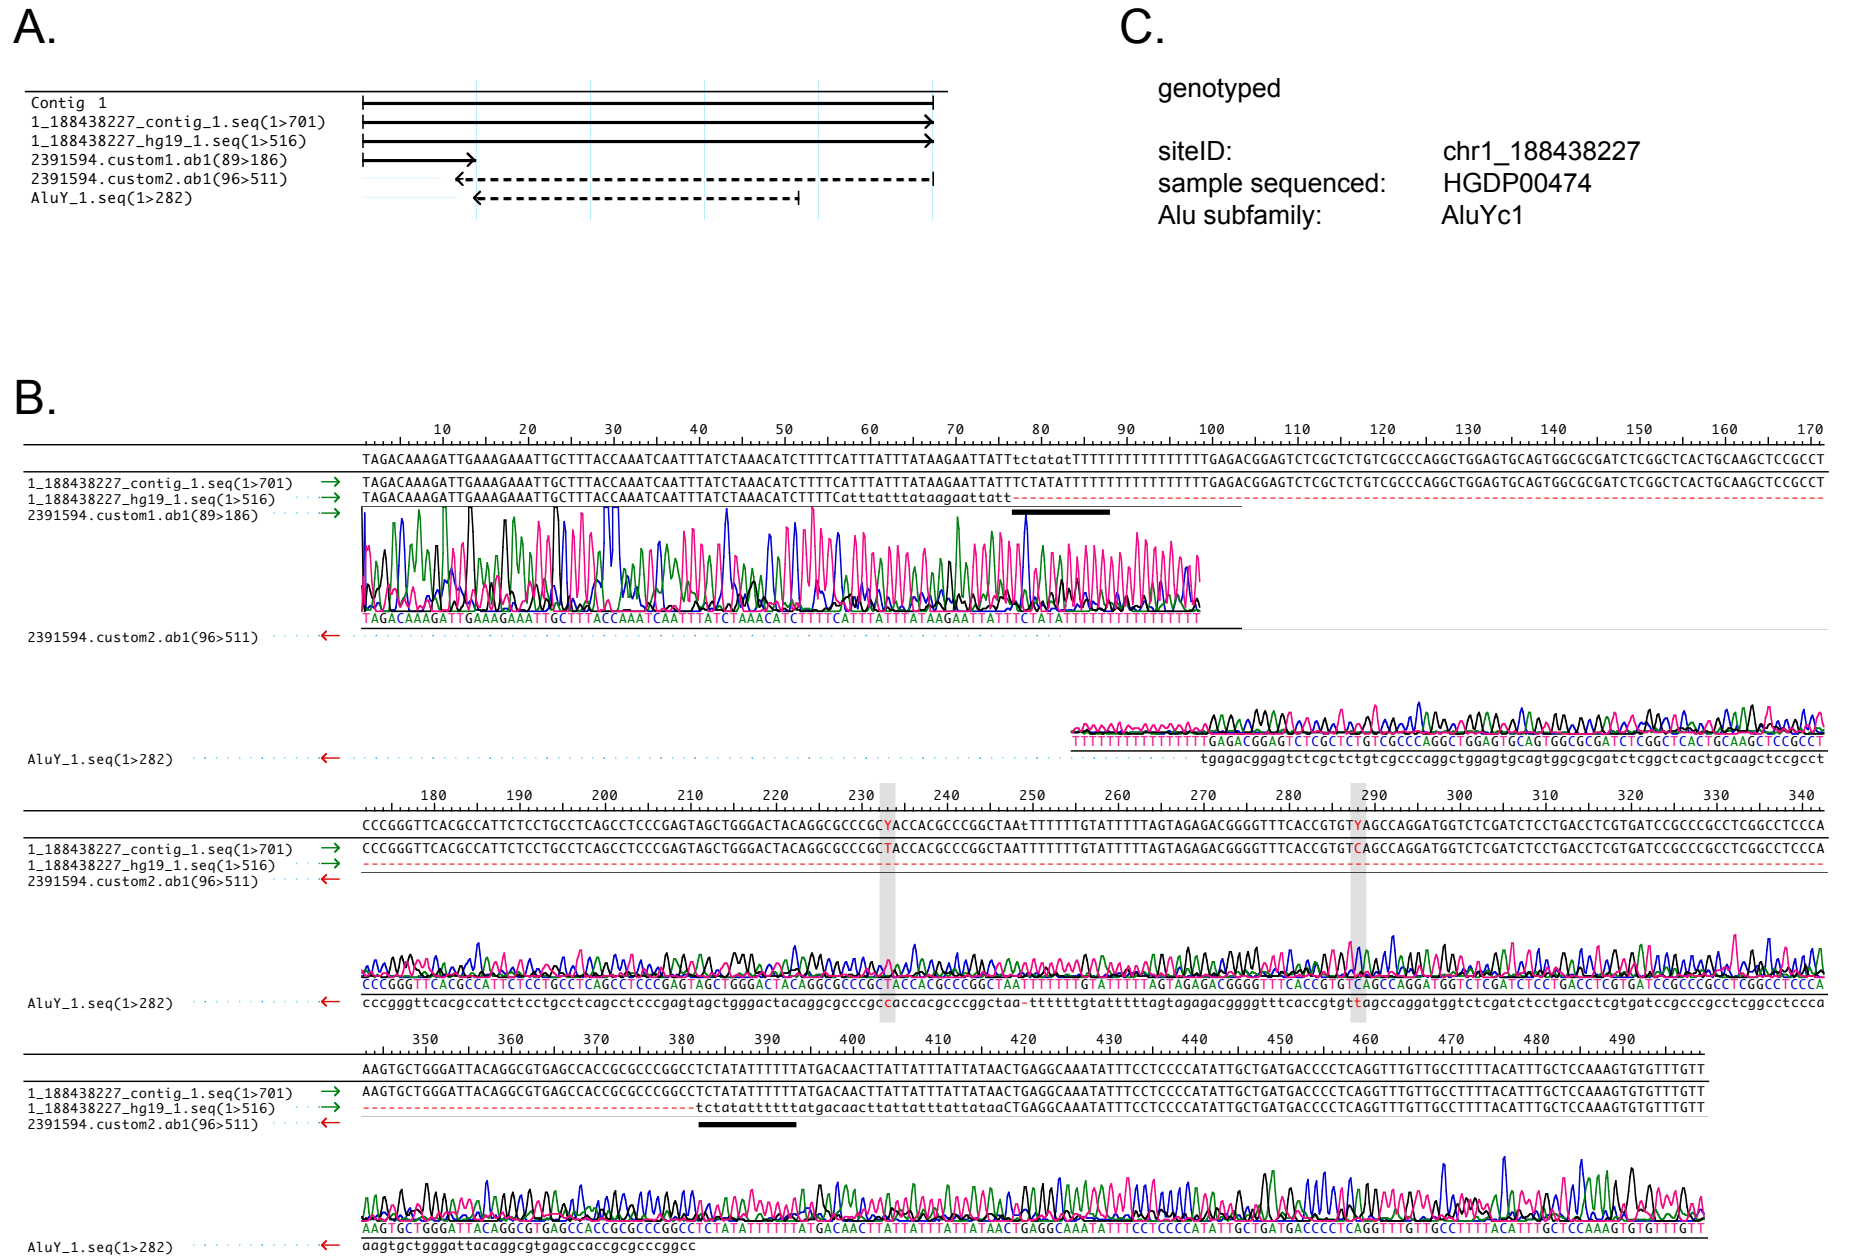

**Figure S5.2**

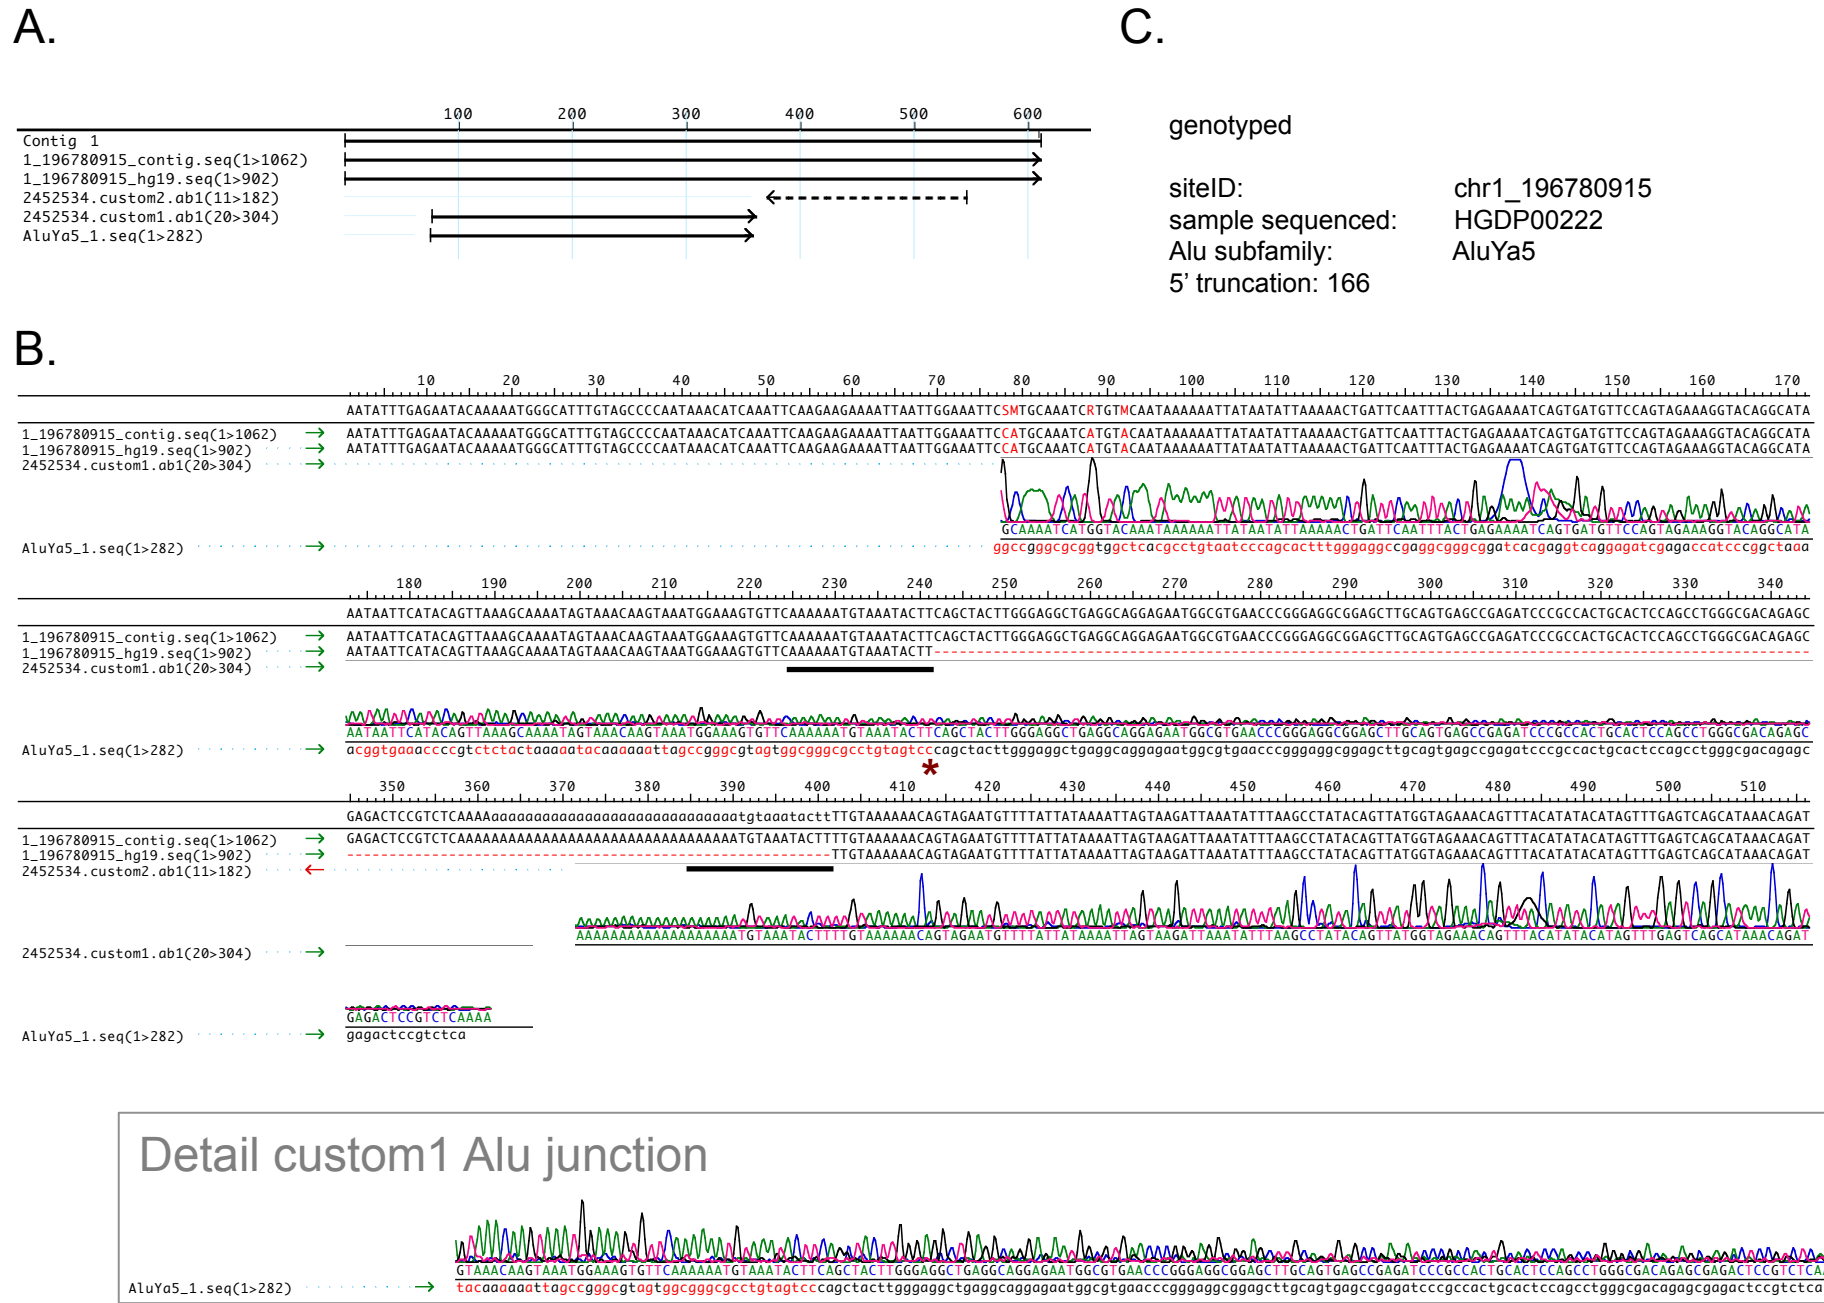

**Figure S5.3**

A.

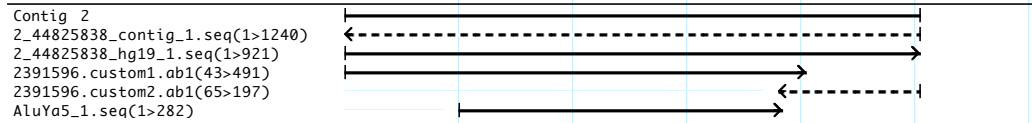

C.

genotyped

siteID: chr2\_44825838  
 sample sequenced: HGDP00474  
 Alu subfamily: AluYa4

B.

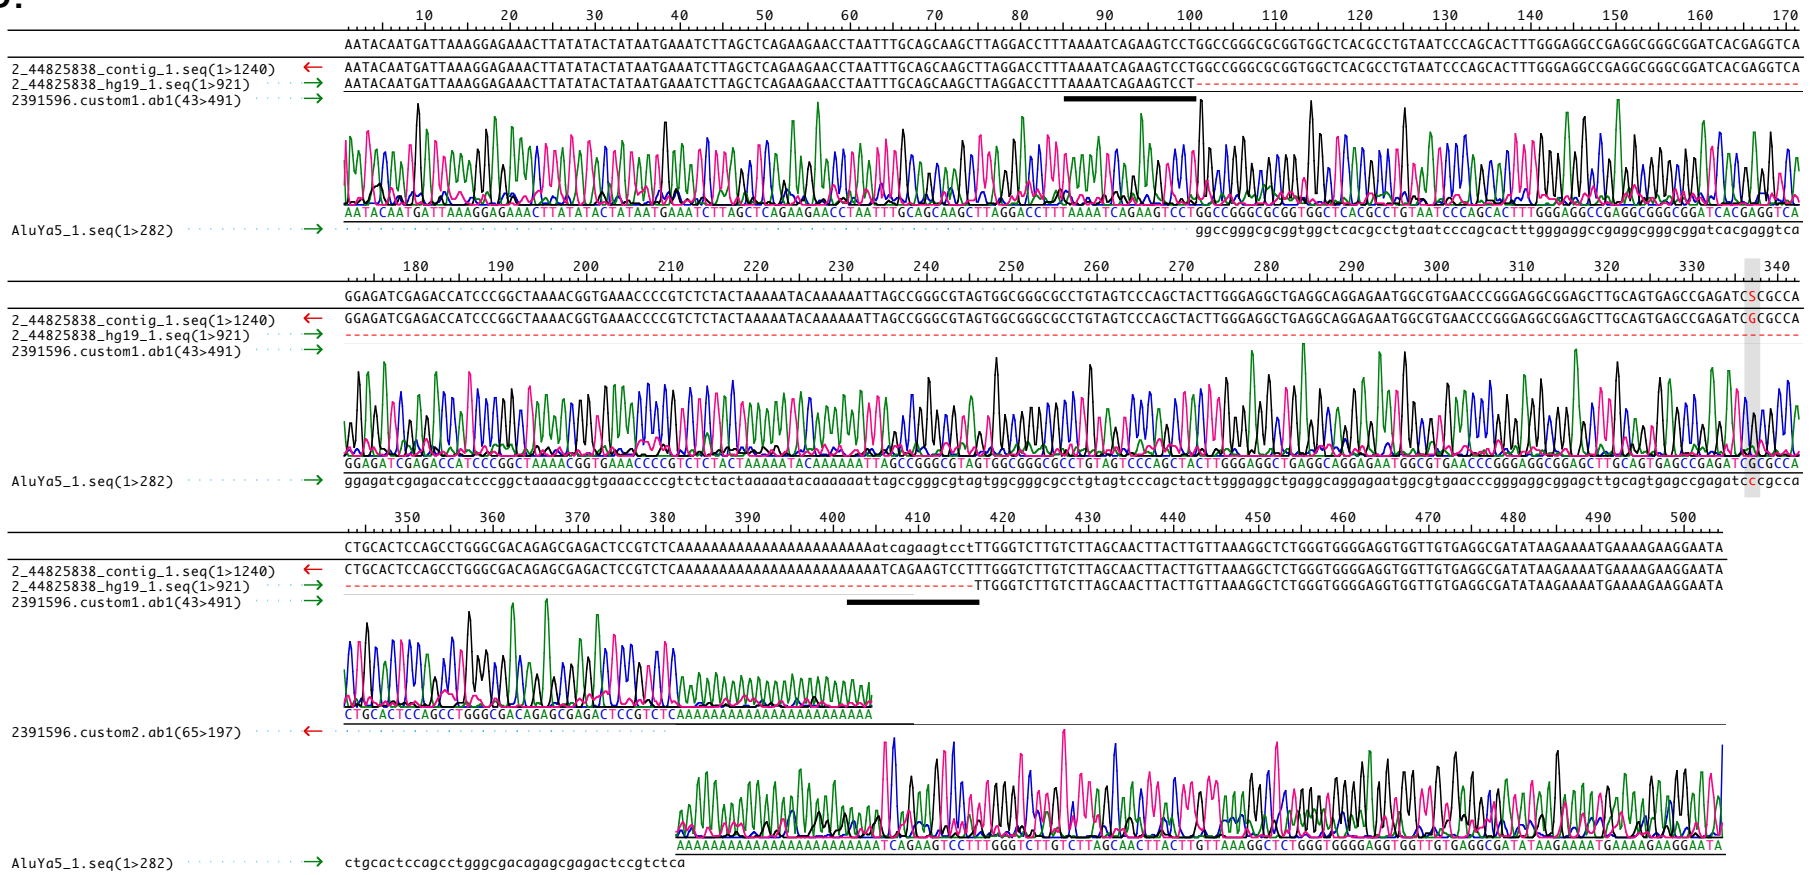

Figure S5.4



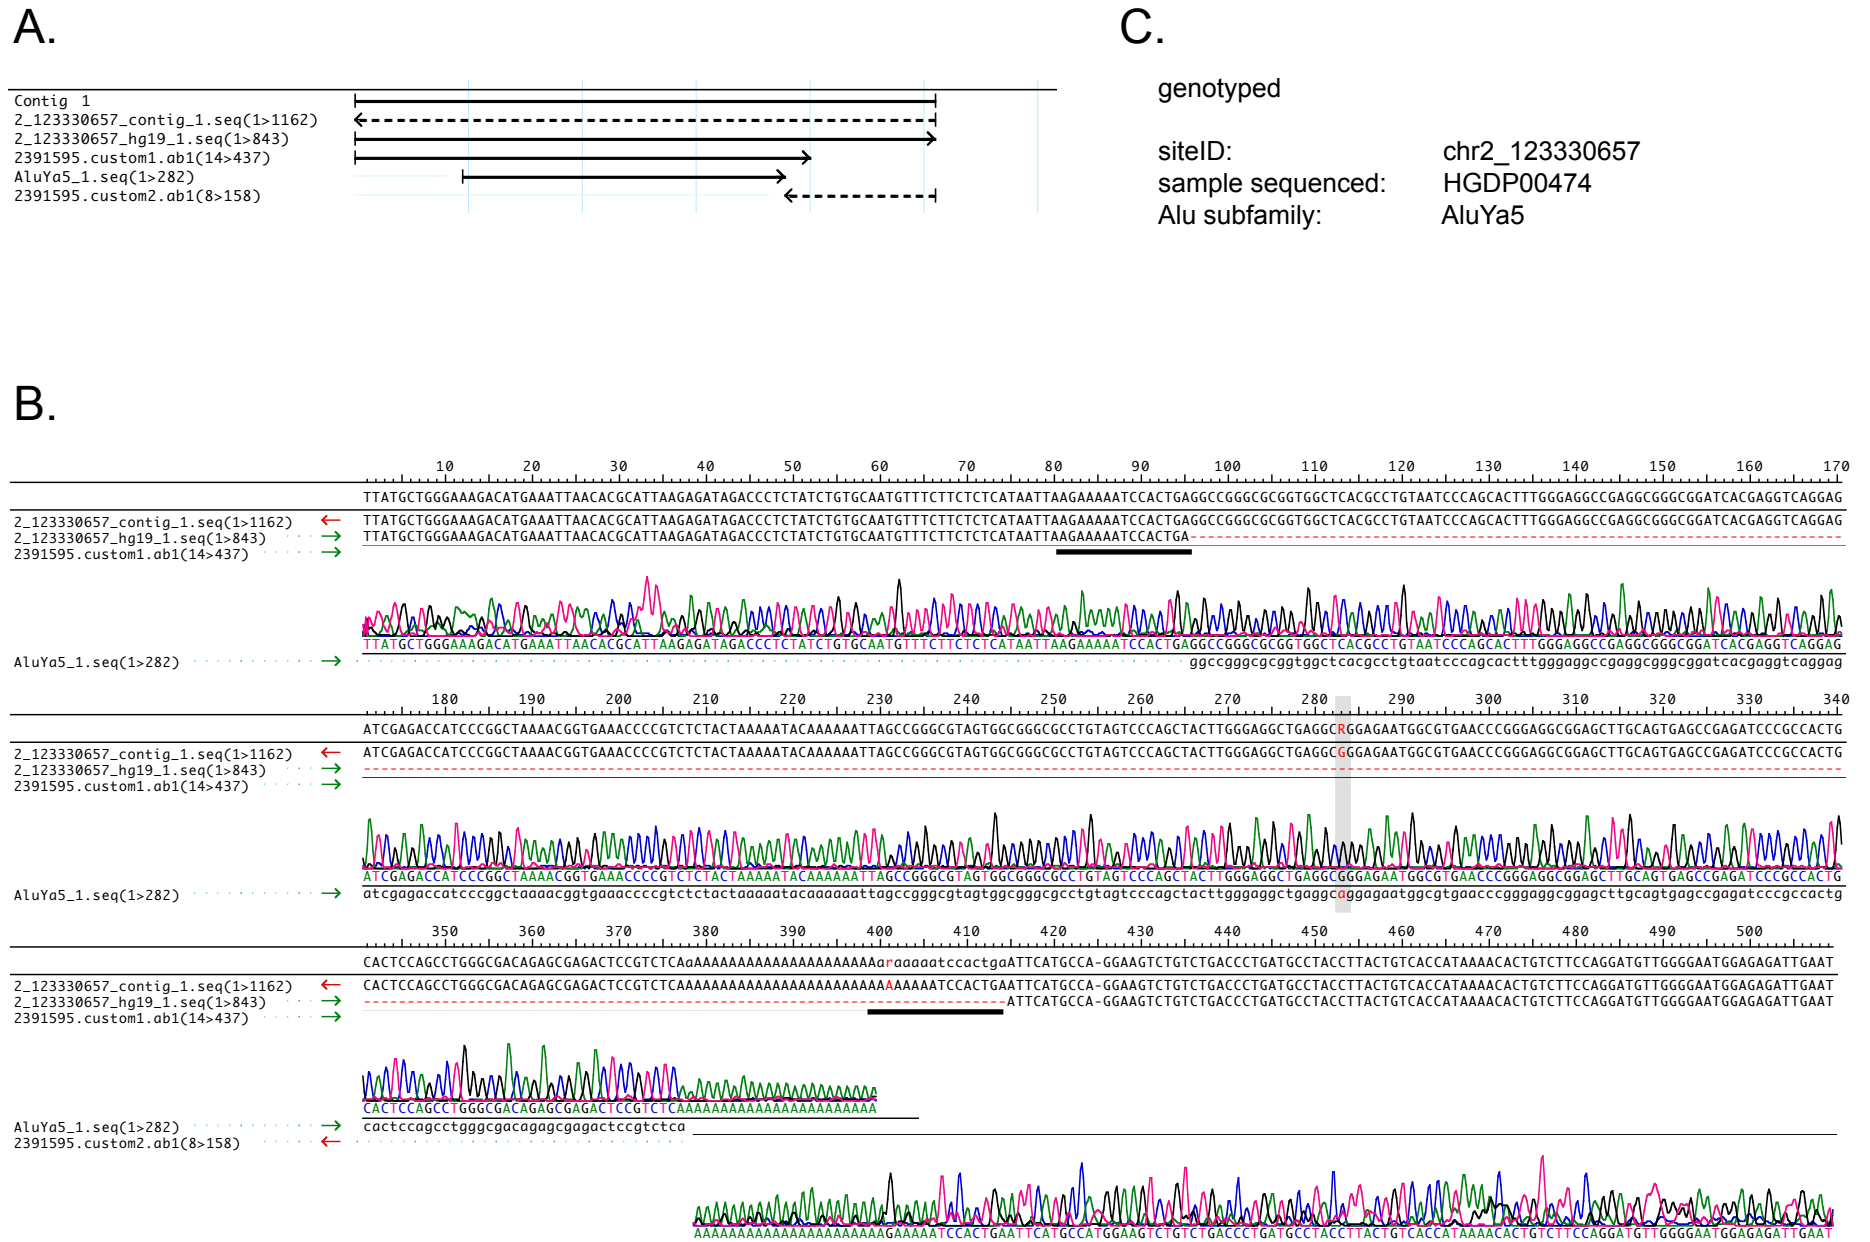

**Figure S5.5**

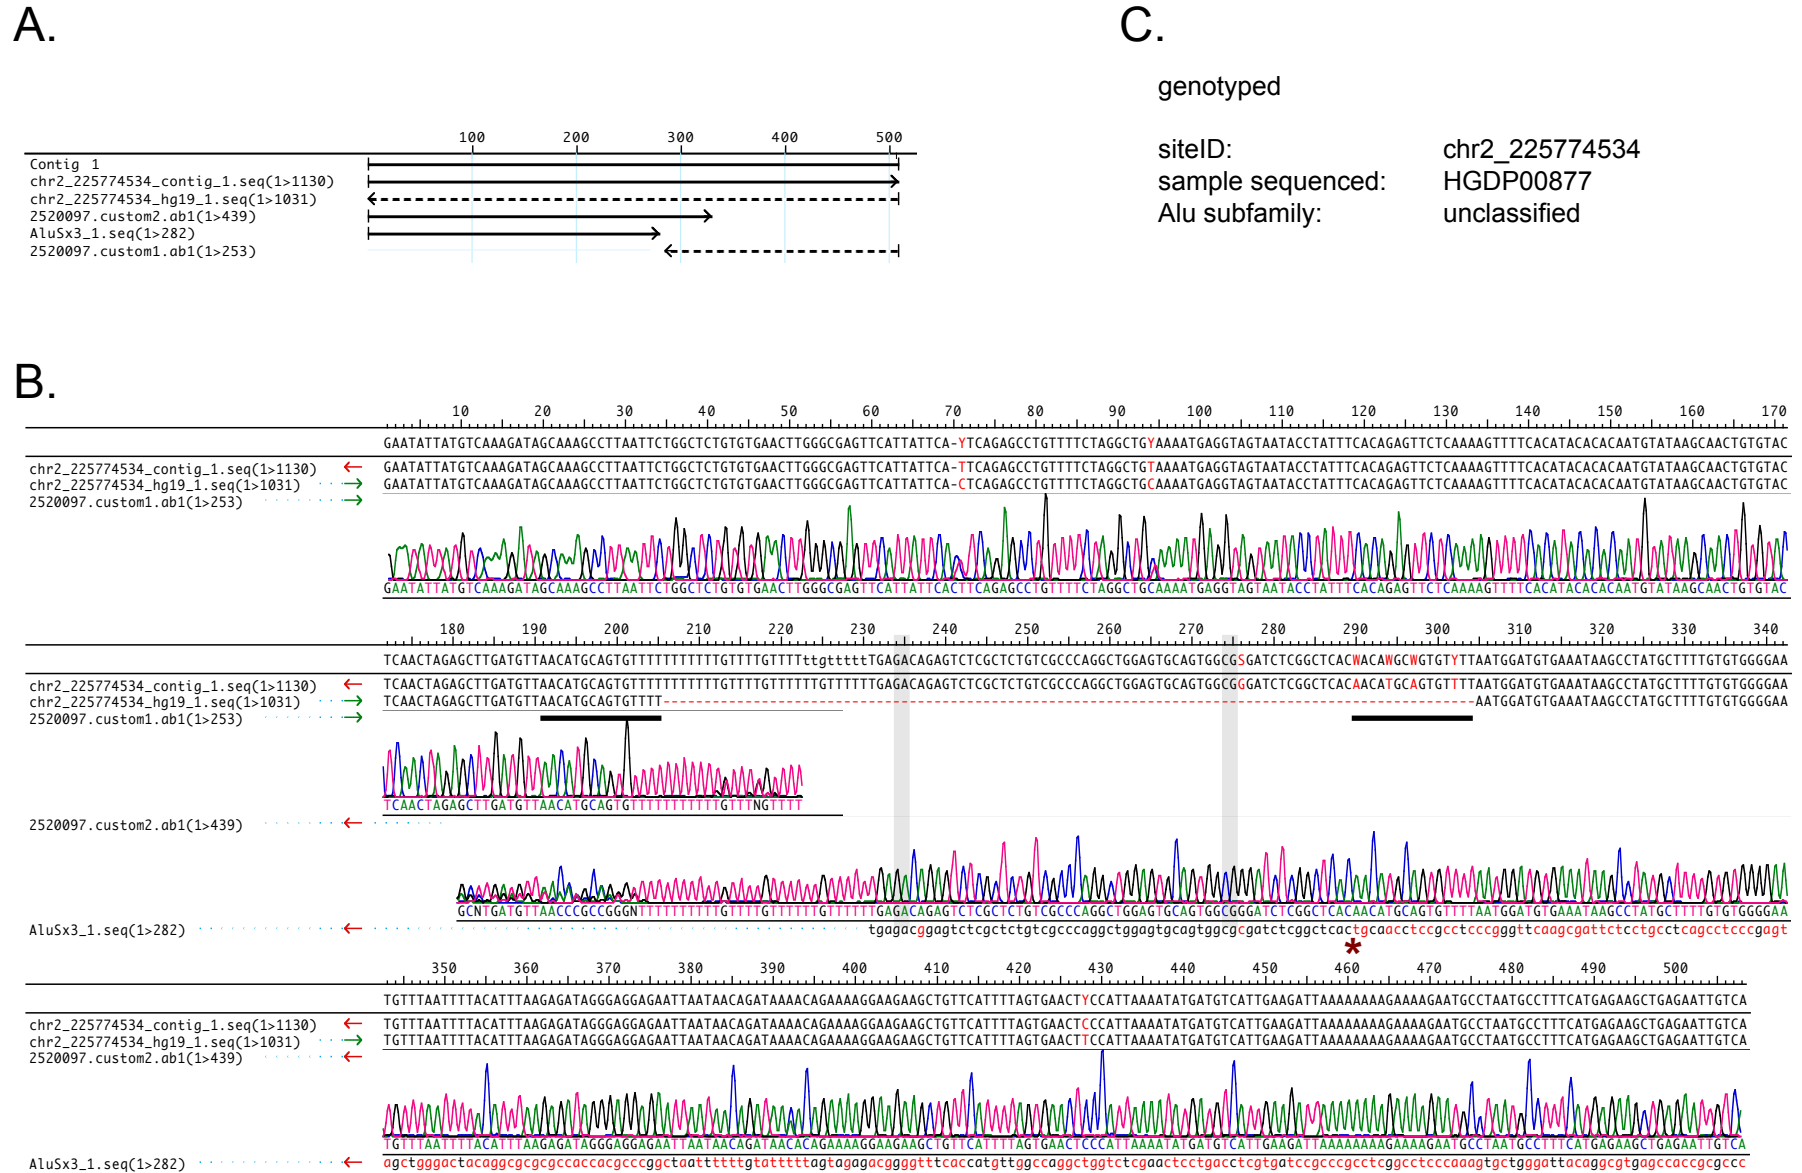

**Figure S5.6**

A.

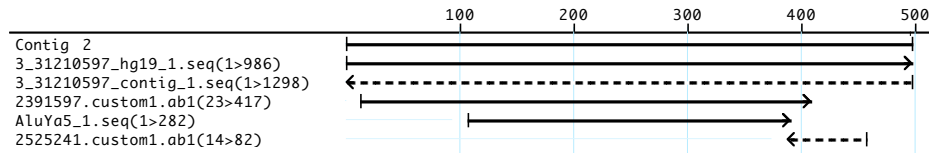

C.

genotyped  
 siteID: chr3\_31210597  
 sample sequenced: HGDP00967  
 Alu subfamily: AluYa5

B.

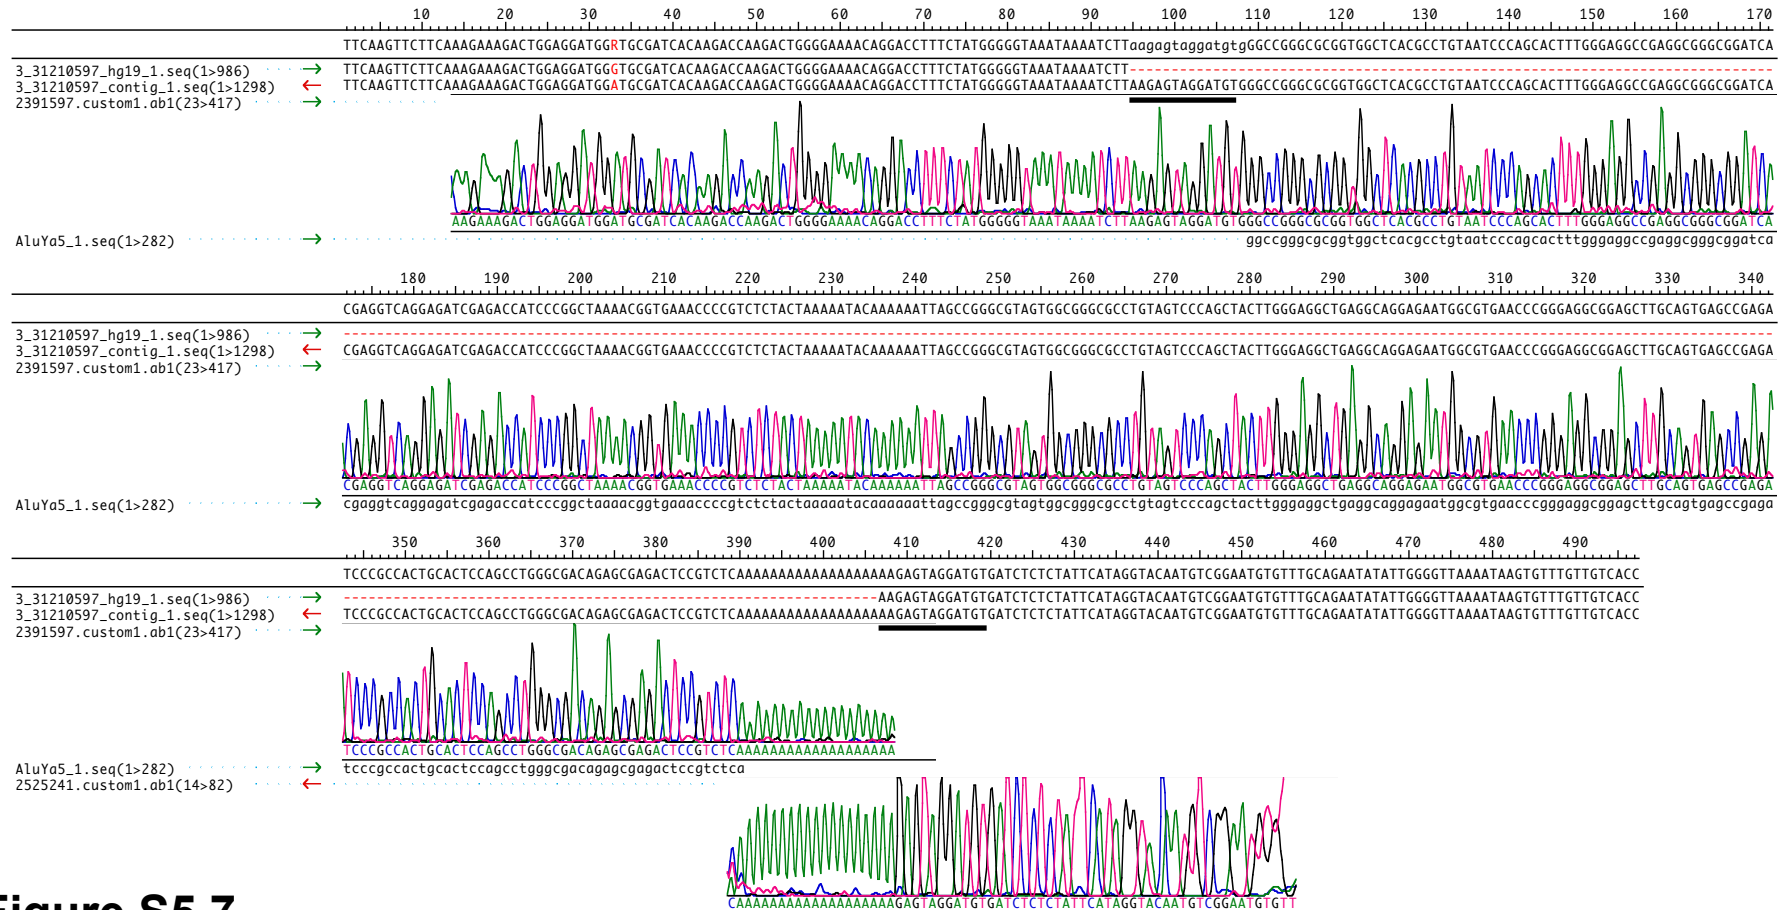

Figure S5.7

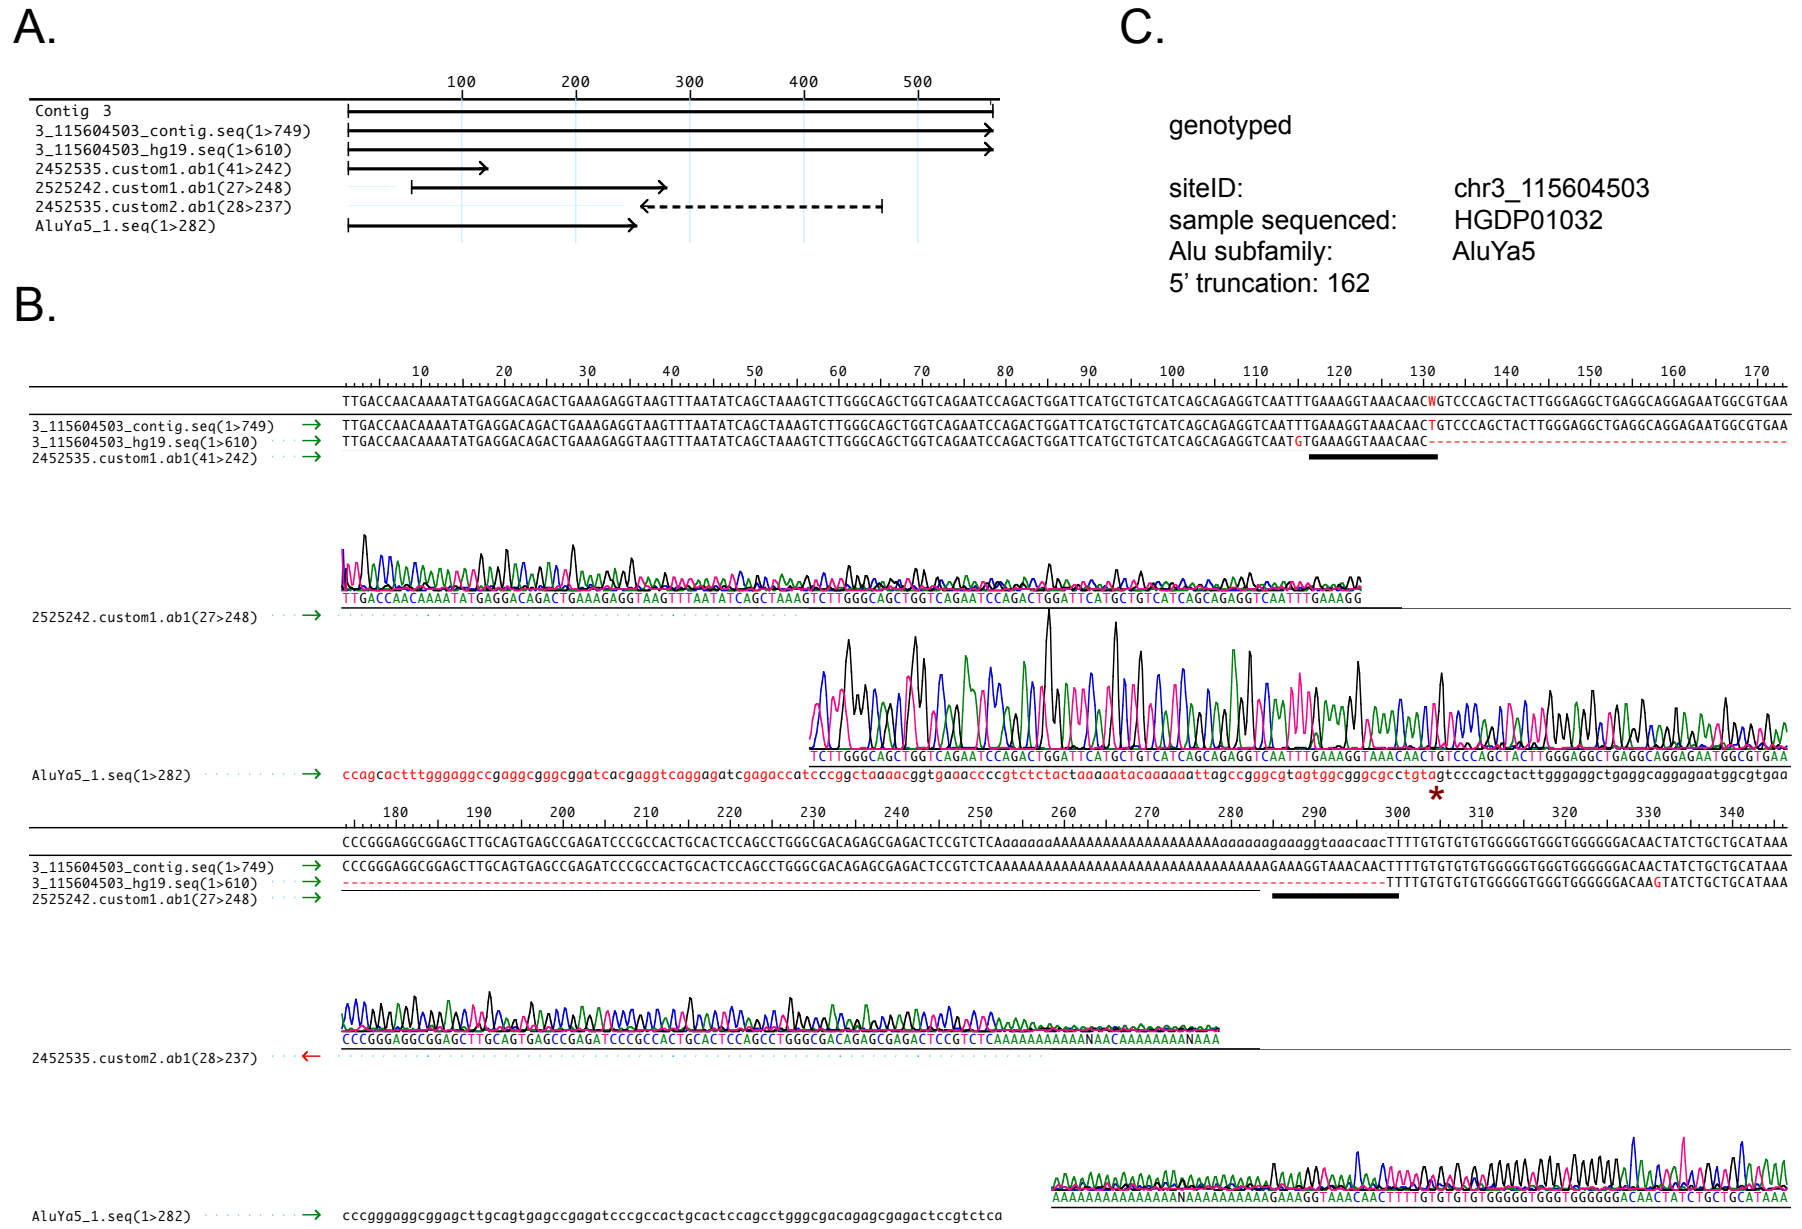

**Figure S5.8**

A.

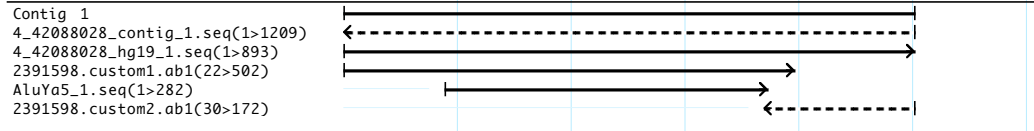

C.

genotyped

siteID: chr4\_42088028  
 sample sequenced: HGDP00713  
 Alu subfamily: AluYa4

B.

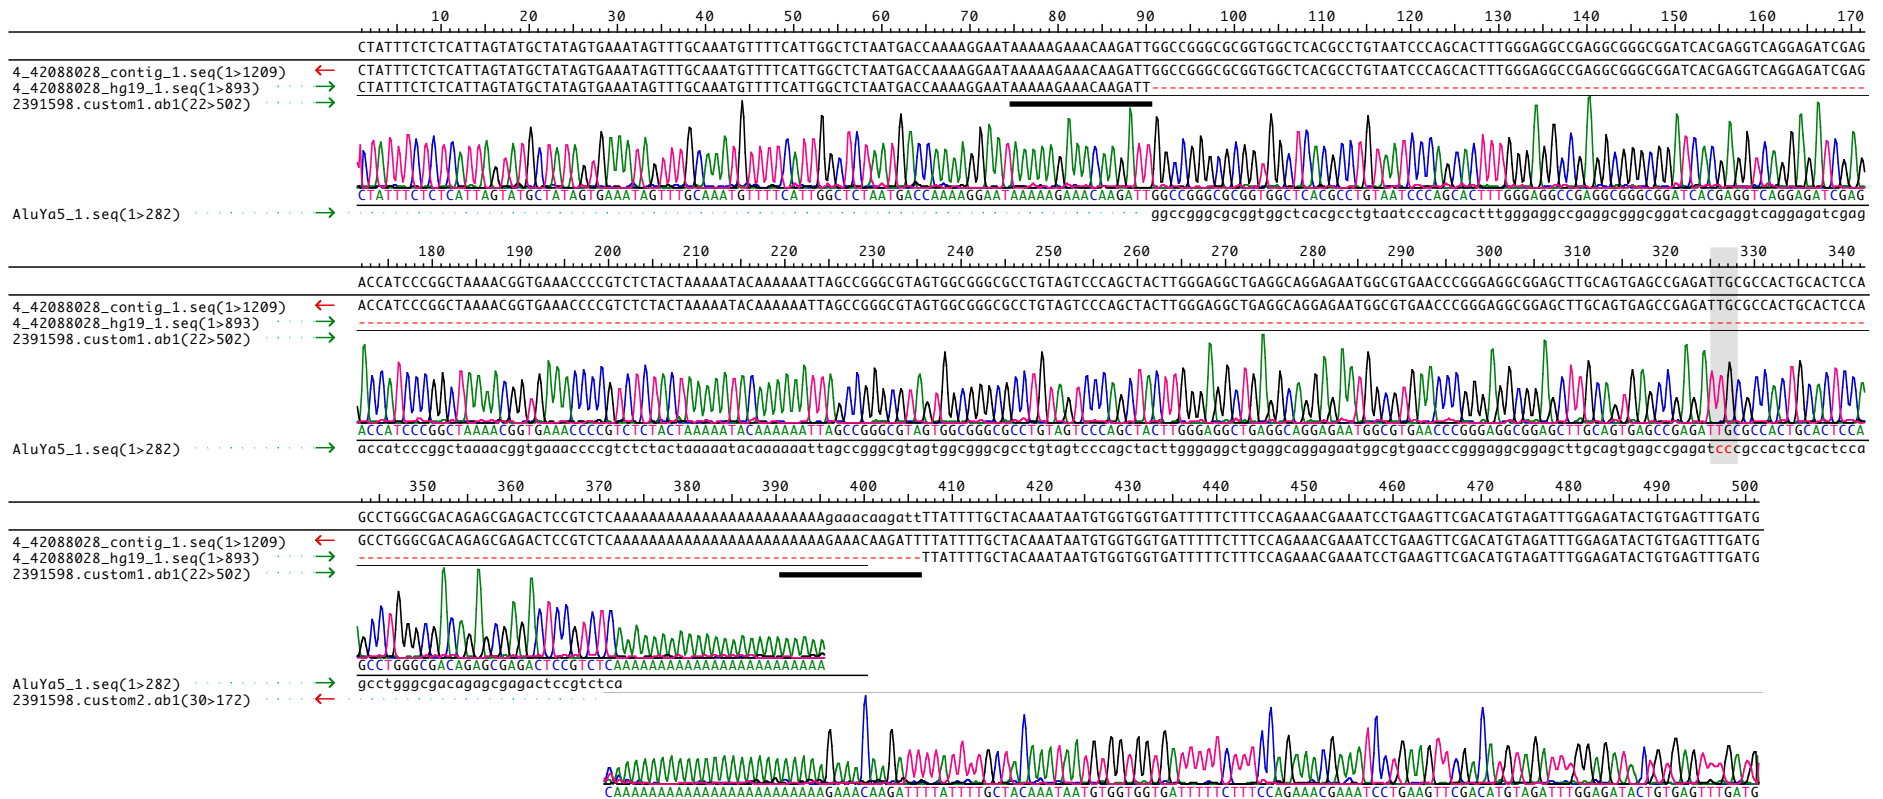

Figure S5.9





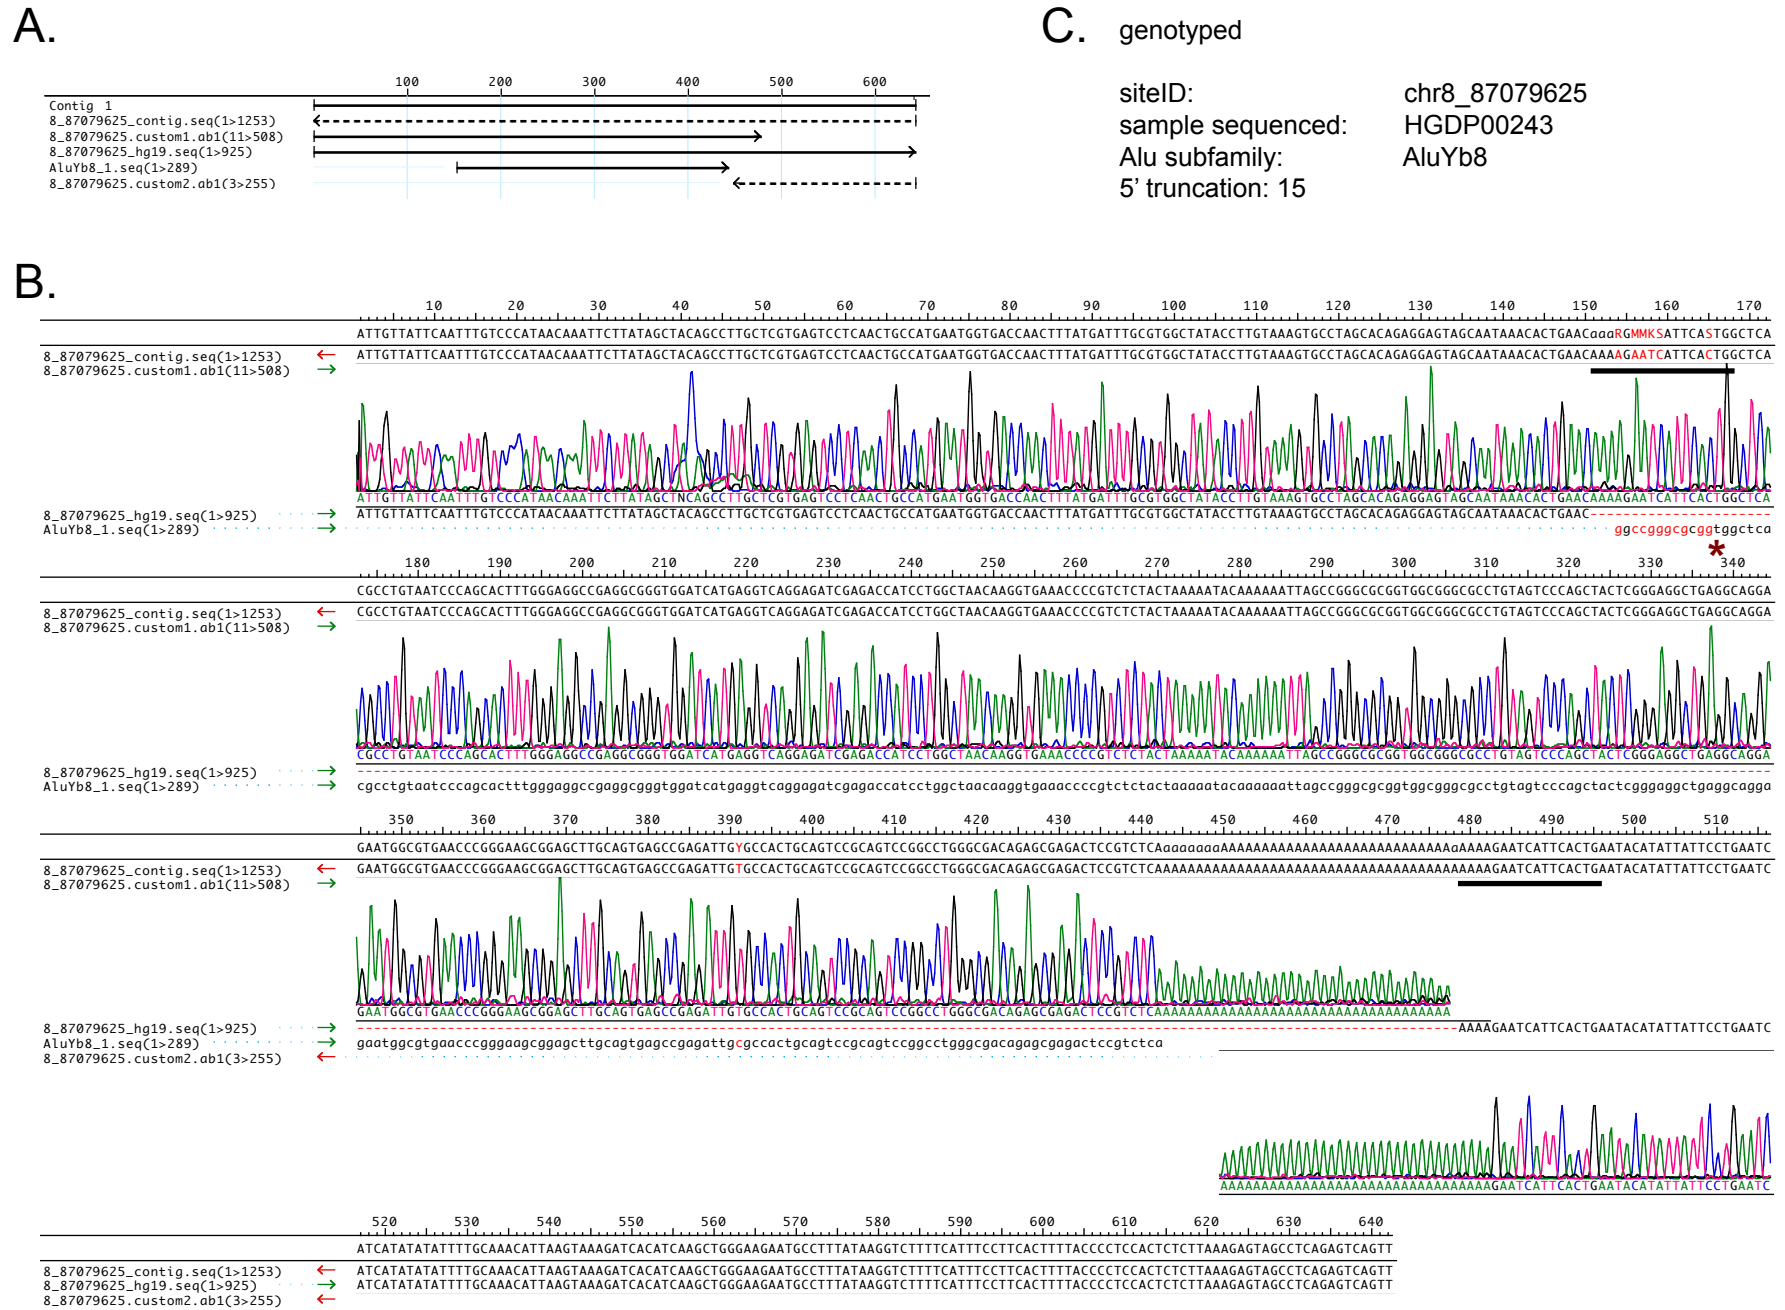

**Figure S5.12**



A.

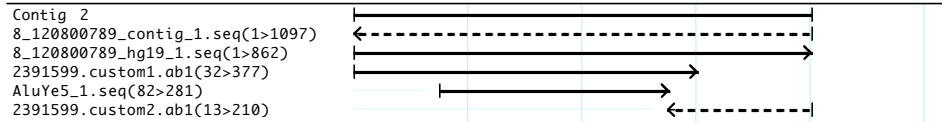

B.

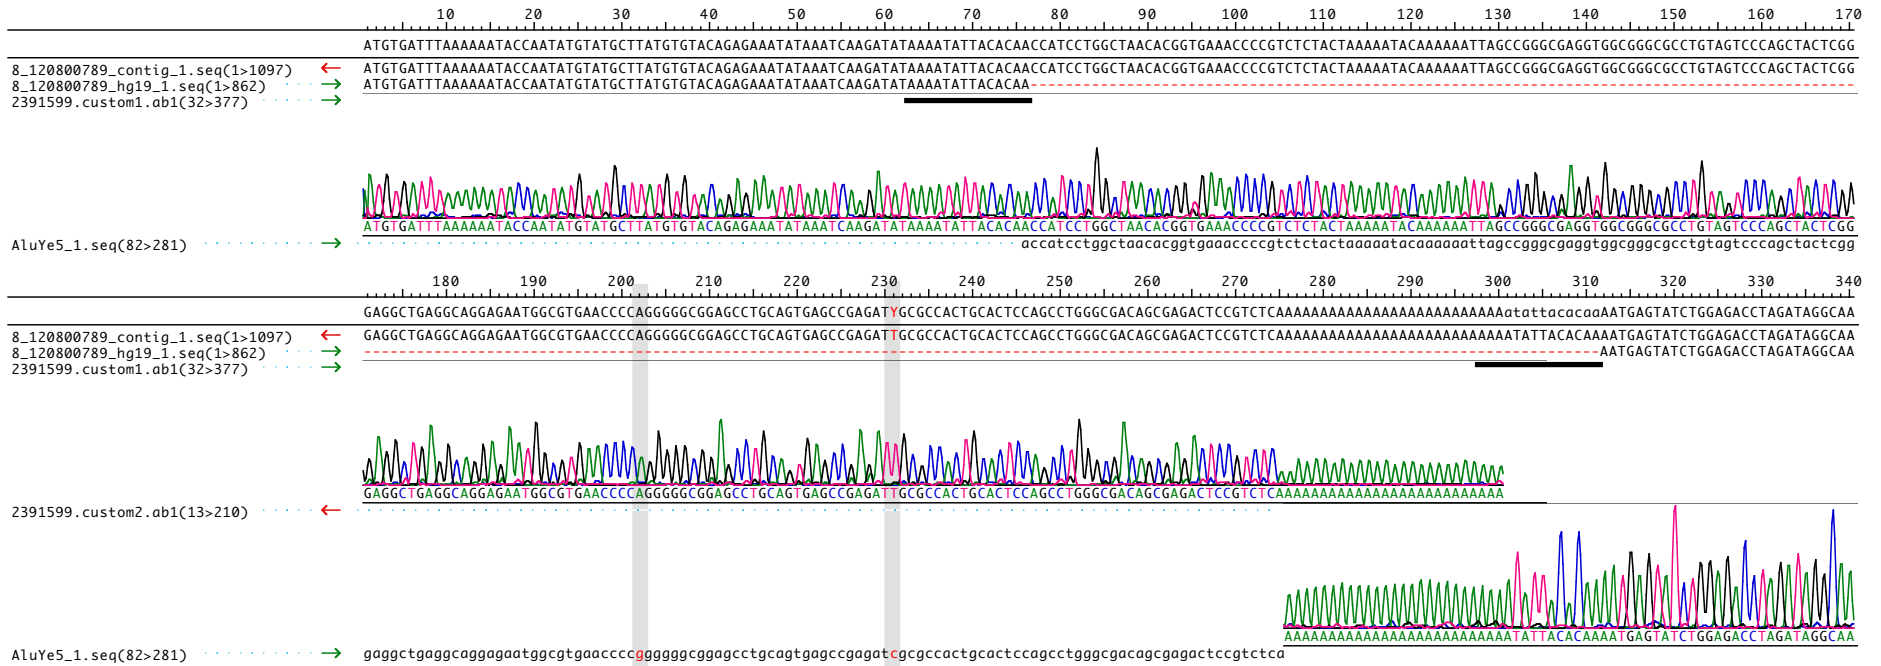

C.

genotyped  
 siteID: chr8\_120800789  
 sample sequenced: HGDP00713  
 Alu subfamily: AluYe5

Figure S5.13



A.

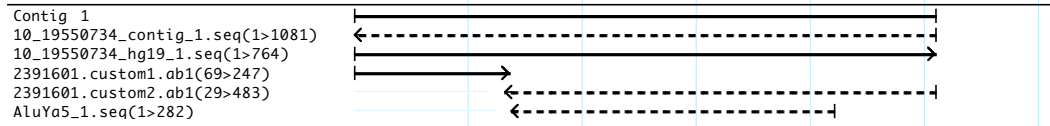

C.

genotyped

siteID: chr10\_19550734  
 sample sequenced: HGDP00474  
 Alu subfamily: AluYa5

B.

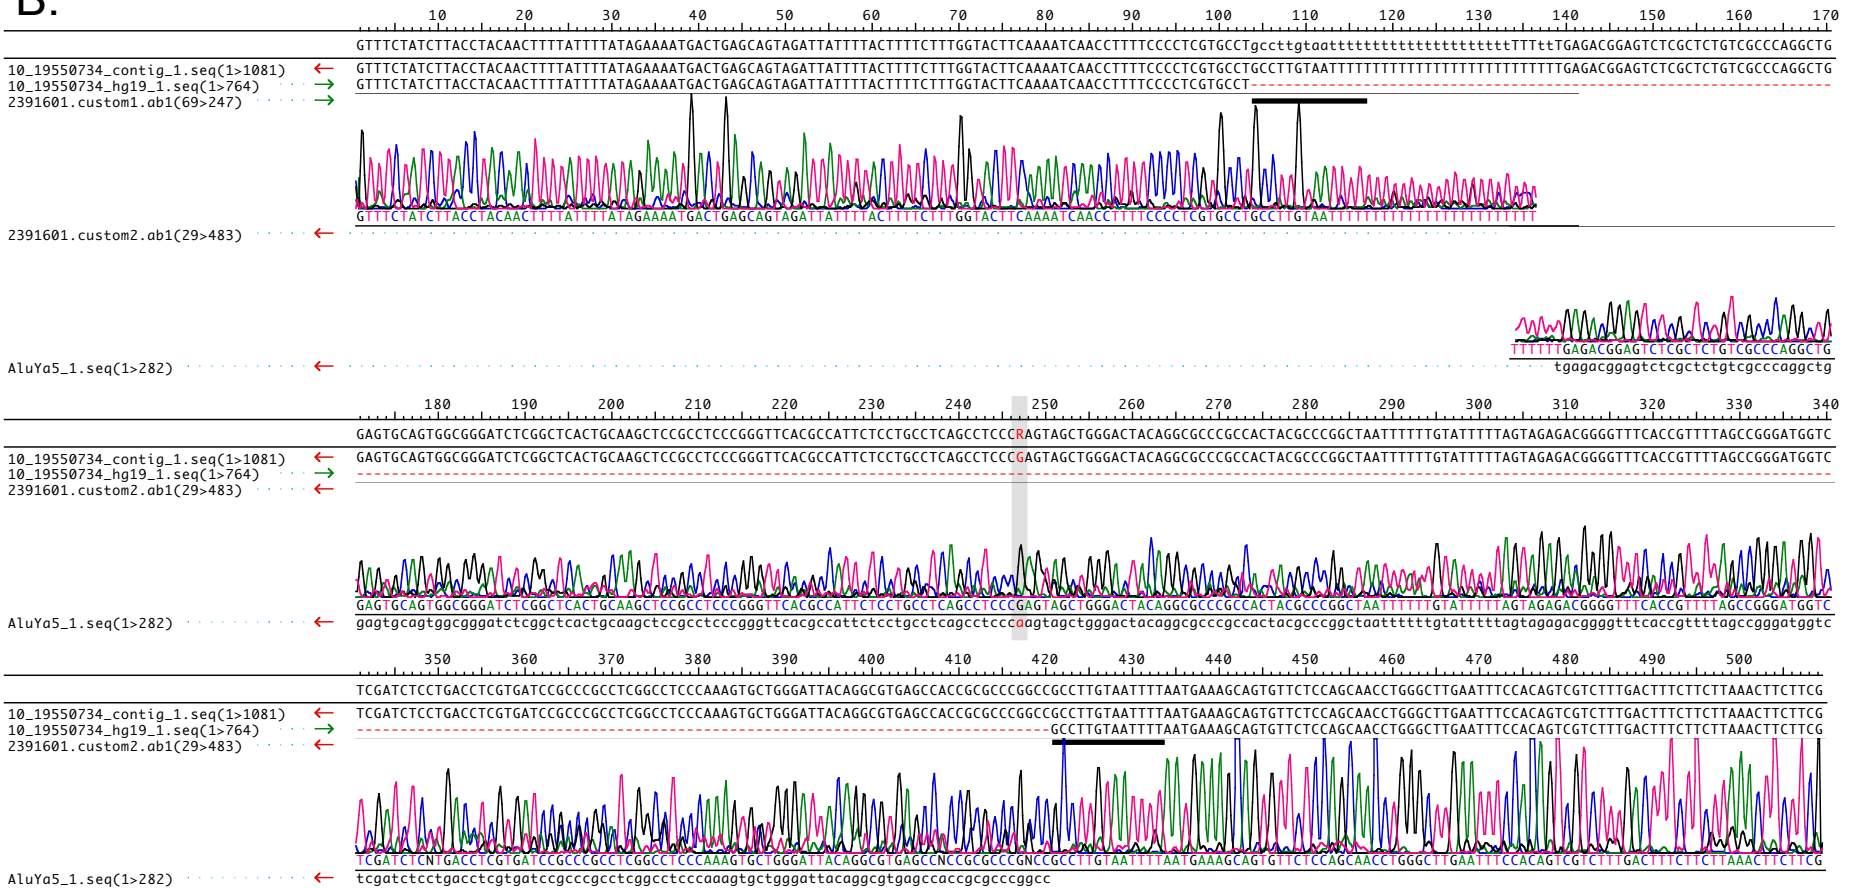

Figure S5.15

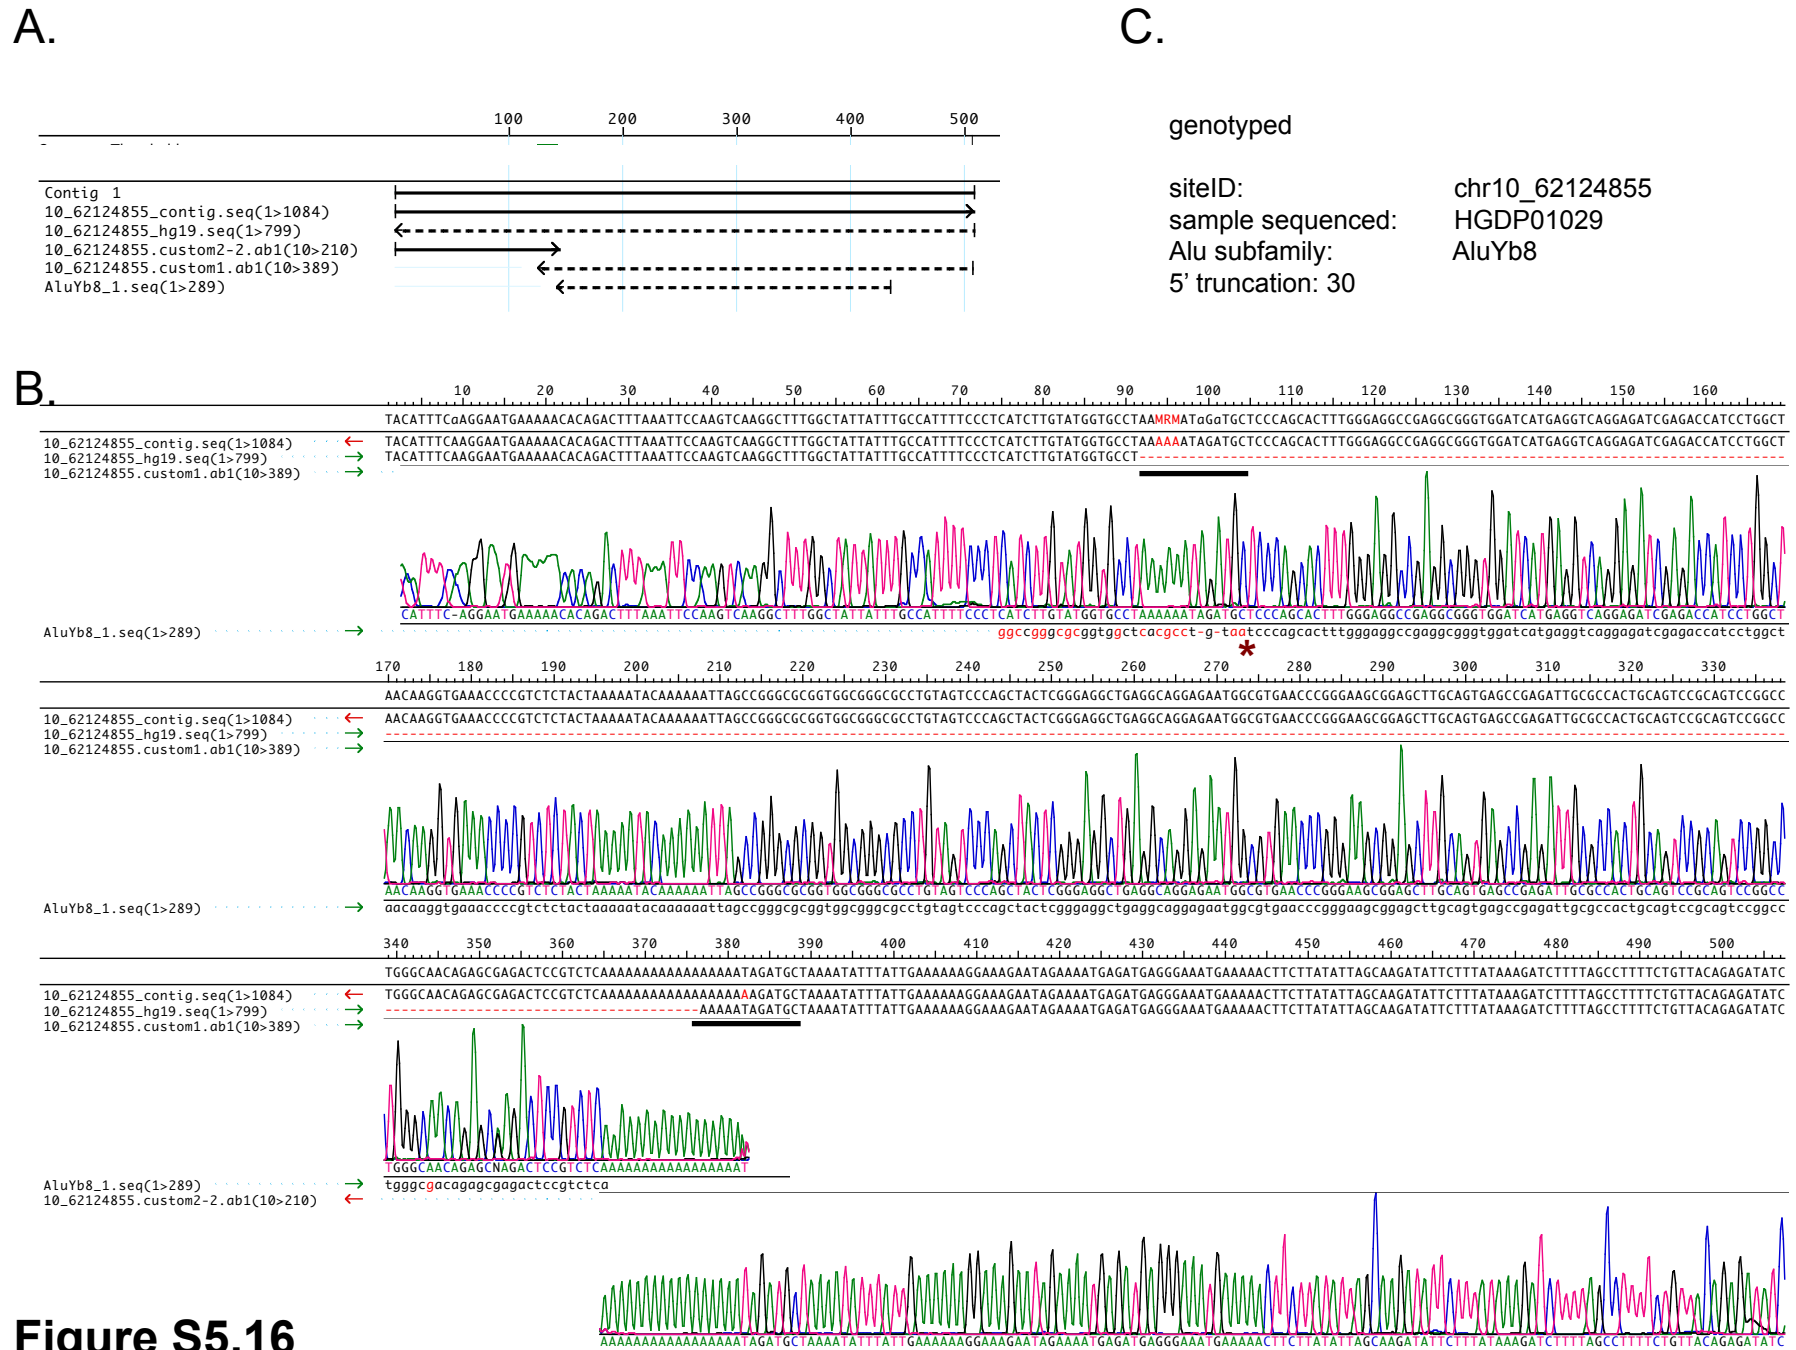



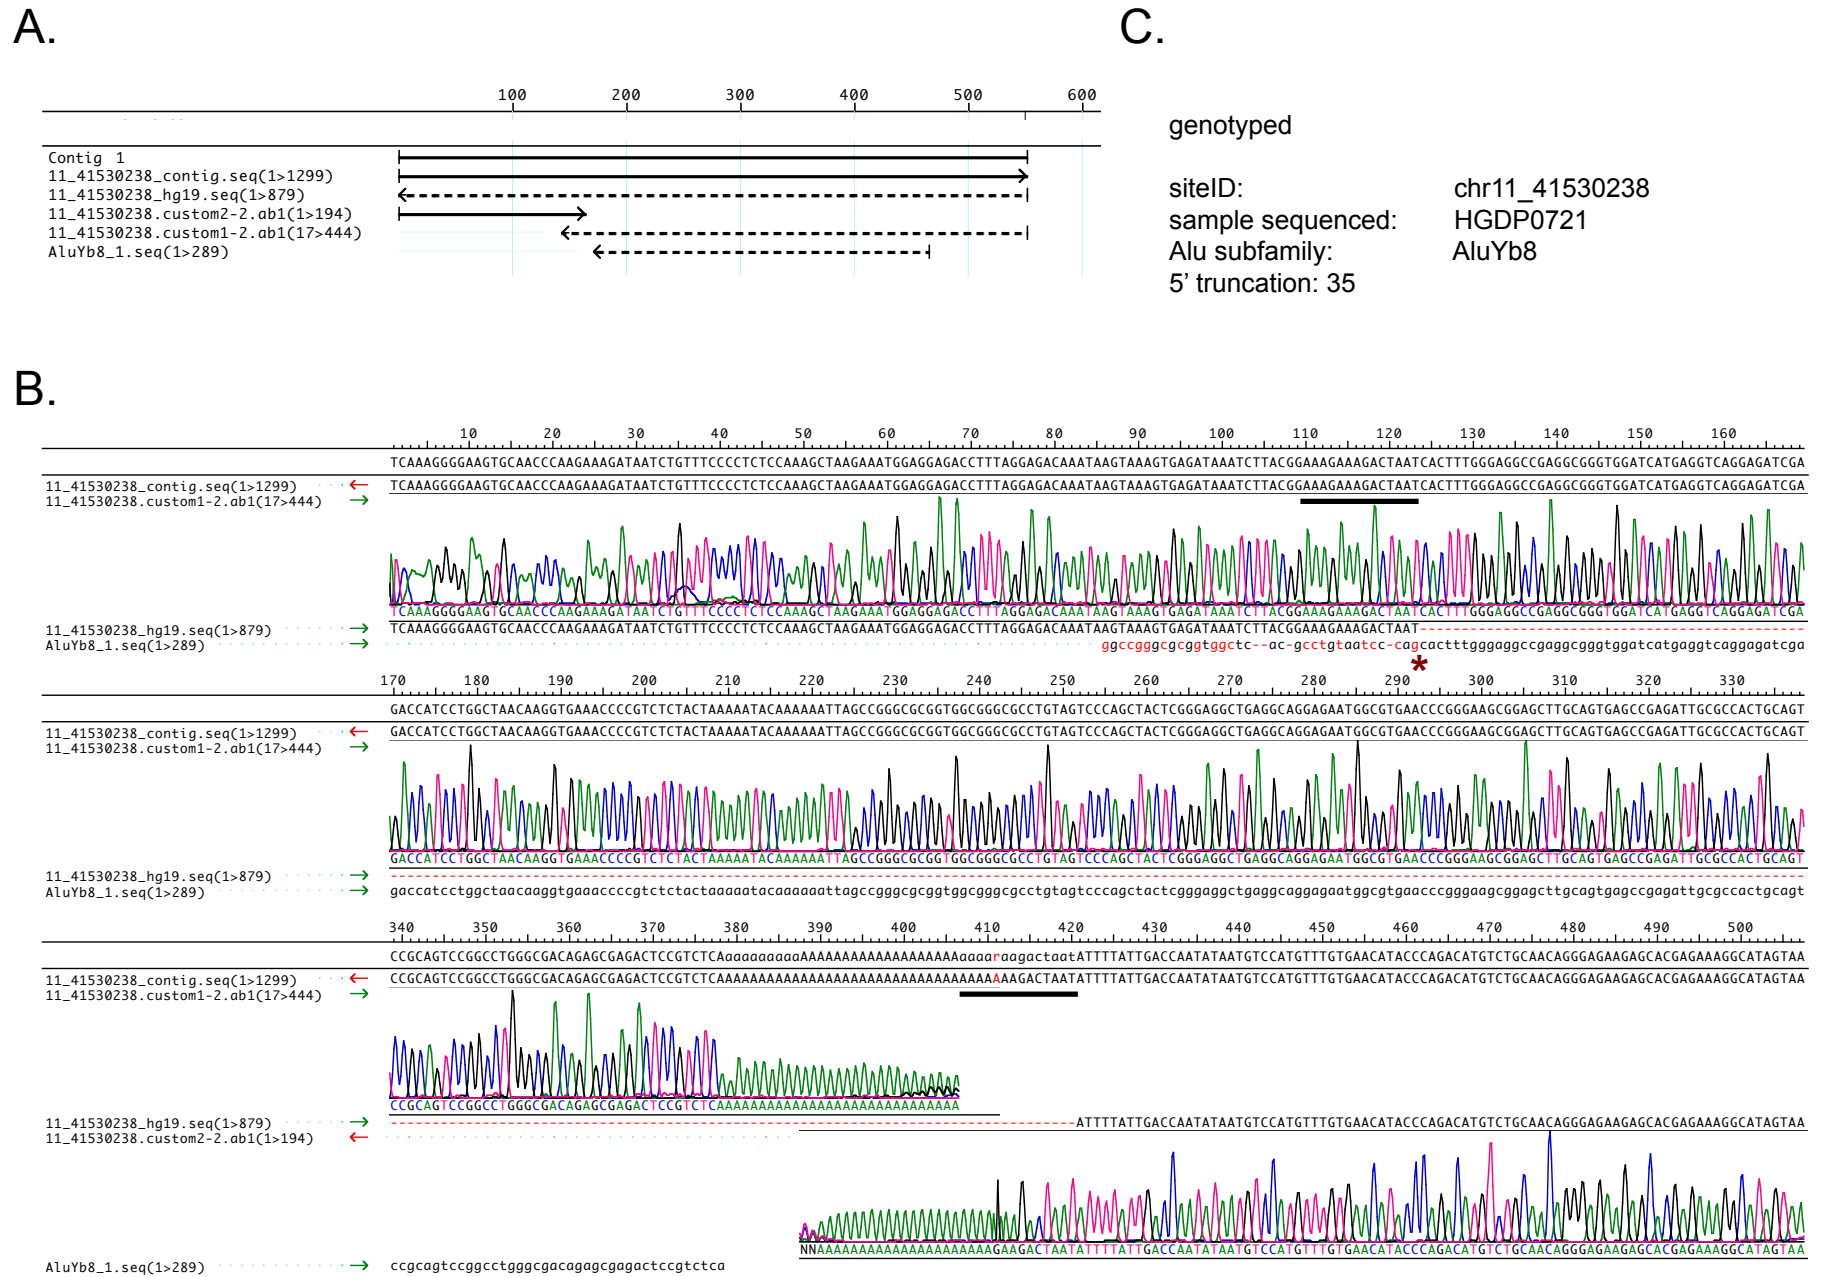

**Figure S5.18**

A.

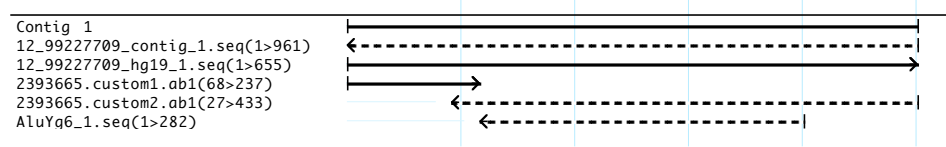

C.

genotyped  
 siteID: chr12\_99227709  
 sample sequenced: HGDP00476  
 Alu subfamily: AluYg6

B.

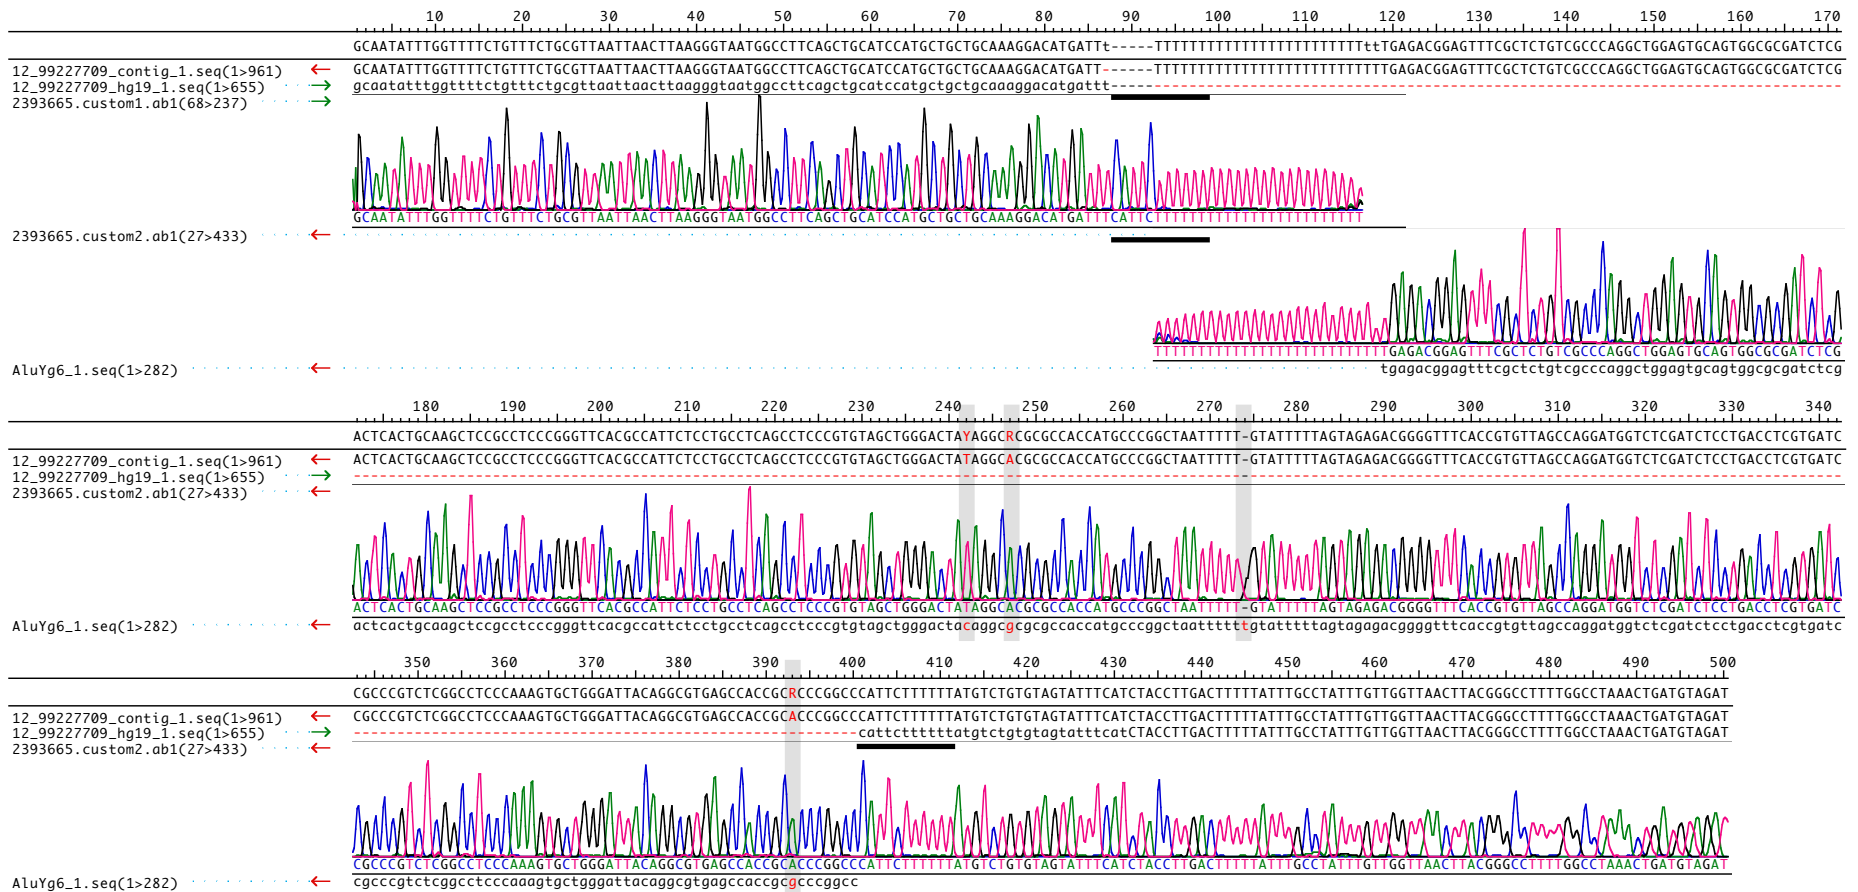

Figure S5.19





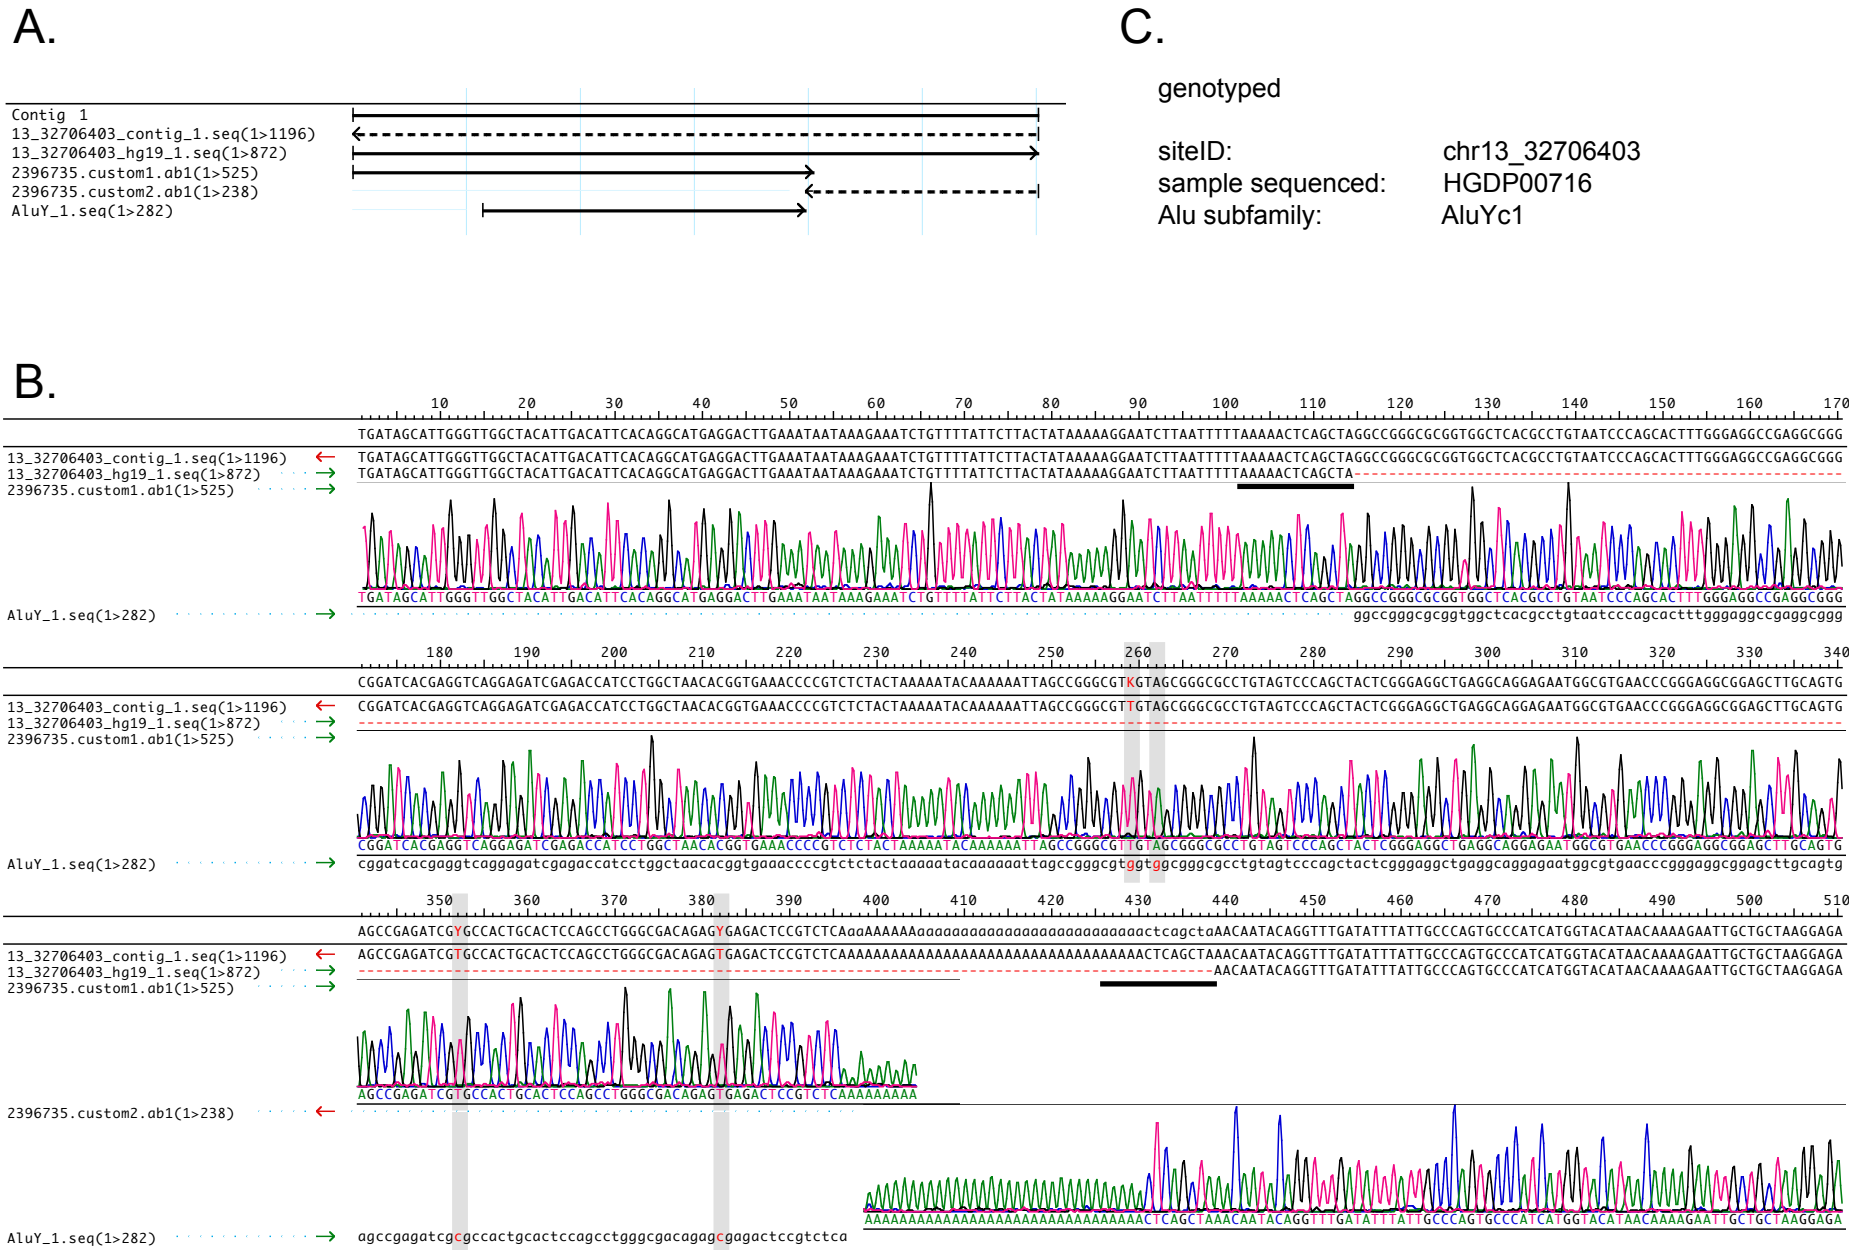

**Figure S5.21**

A.

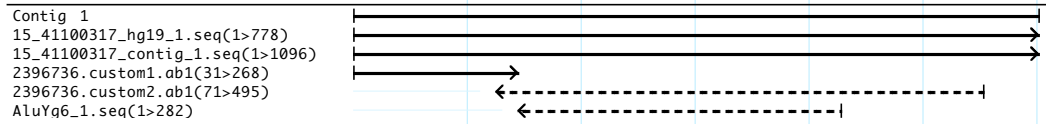

C.

genotyped  
 siteID: chr15\_41100317  
 sample sequenced: HGDP01264  
 Alu subfamily: AluYg6

B.

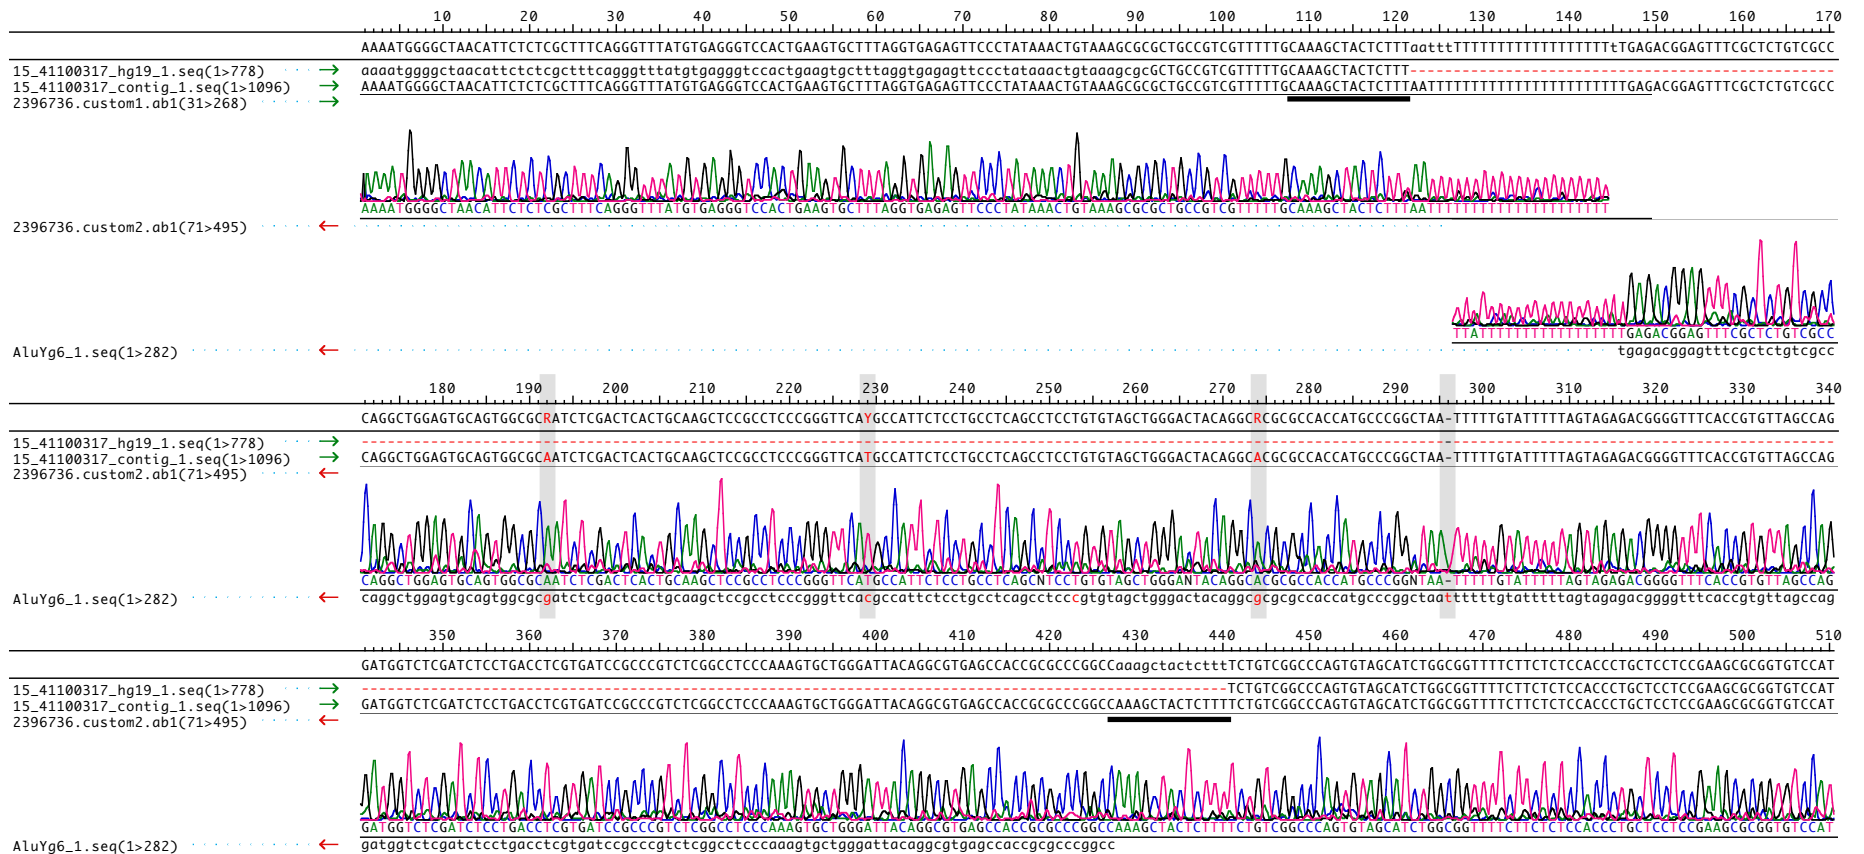

Figure S5.22



A.

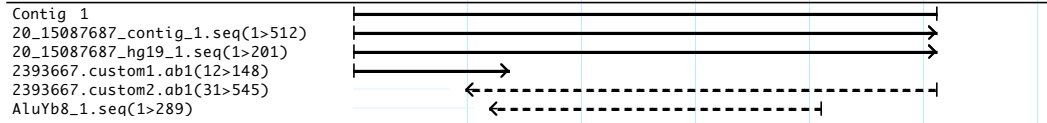

C.

genotyped

siteID: chr20\_15087687  
 sample sequenced: HGDP00854  
 Alu subfamily: AluYb8

B.

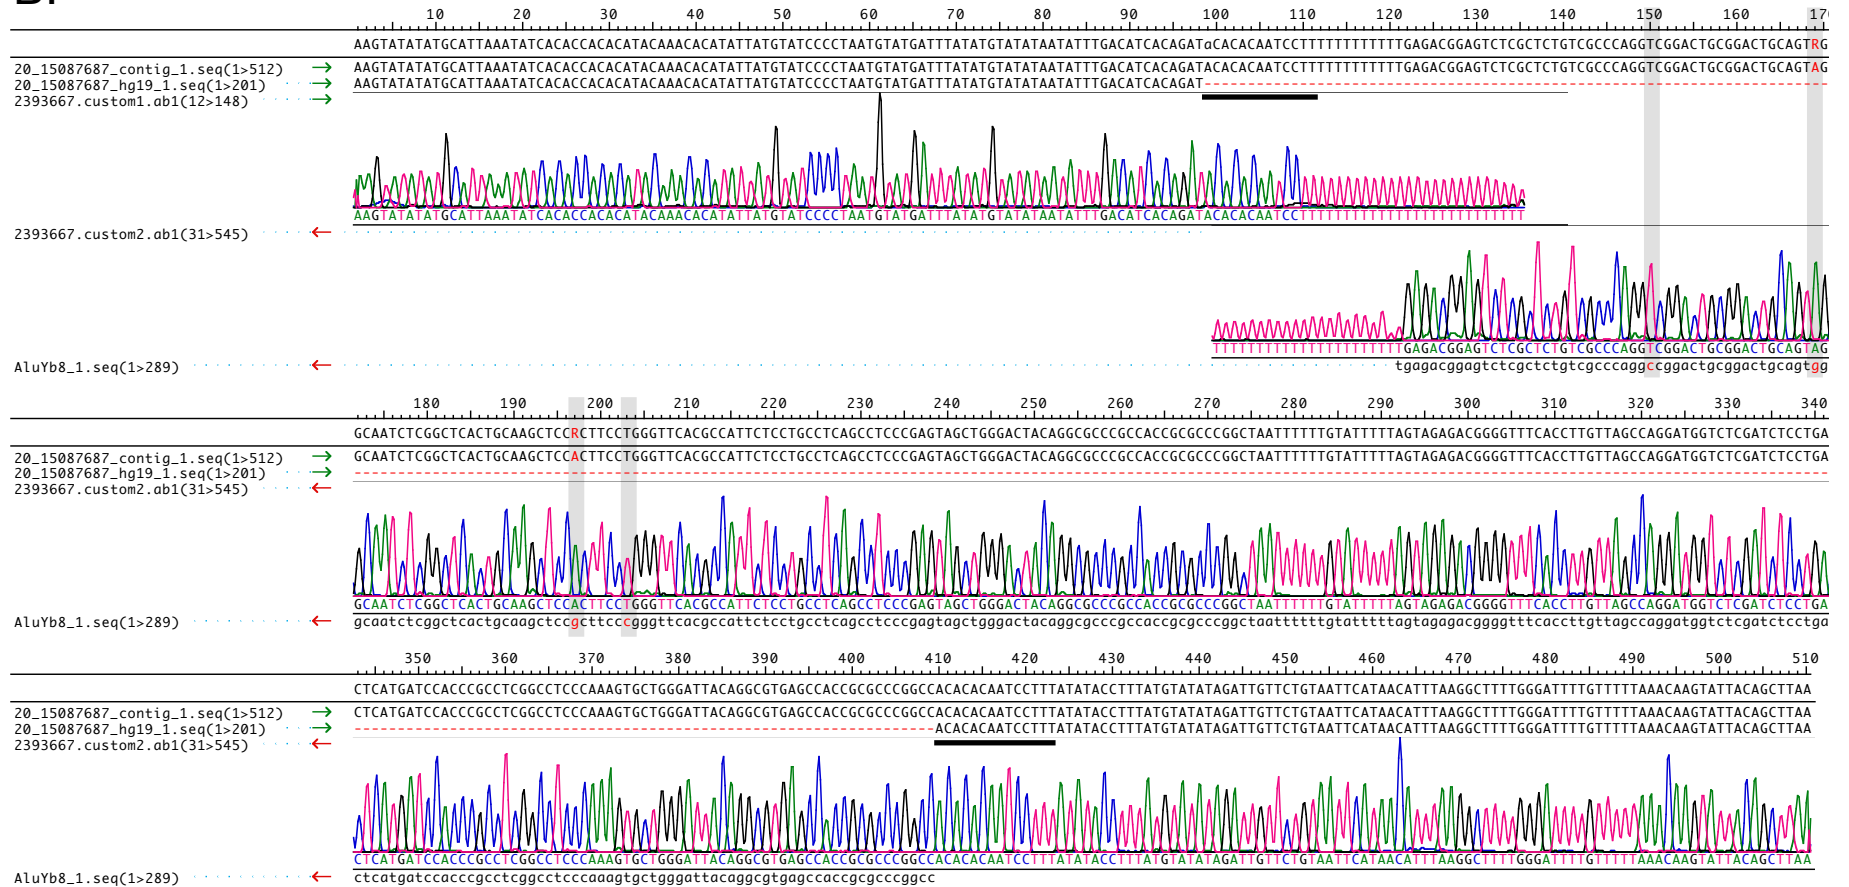

Figure S5.24





A.

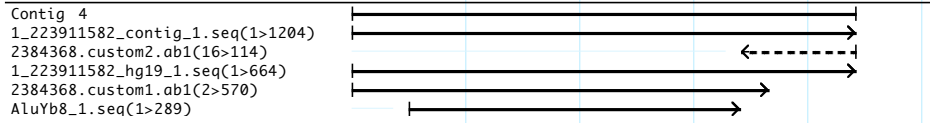

C.

not genotyped

siteID: chr1\_223911582  
 sample sequenced: HGDP00967  
 Alu subfamily: AluYb8

B.

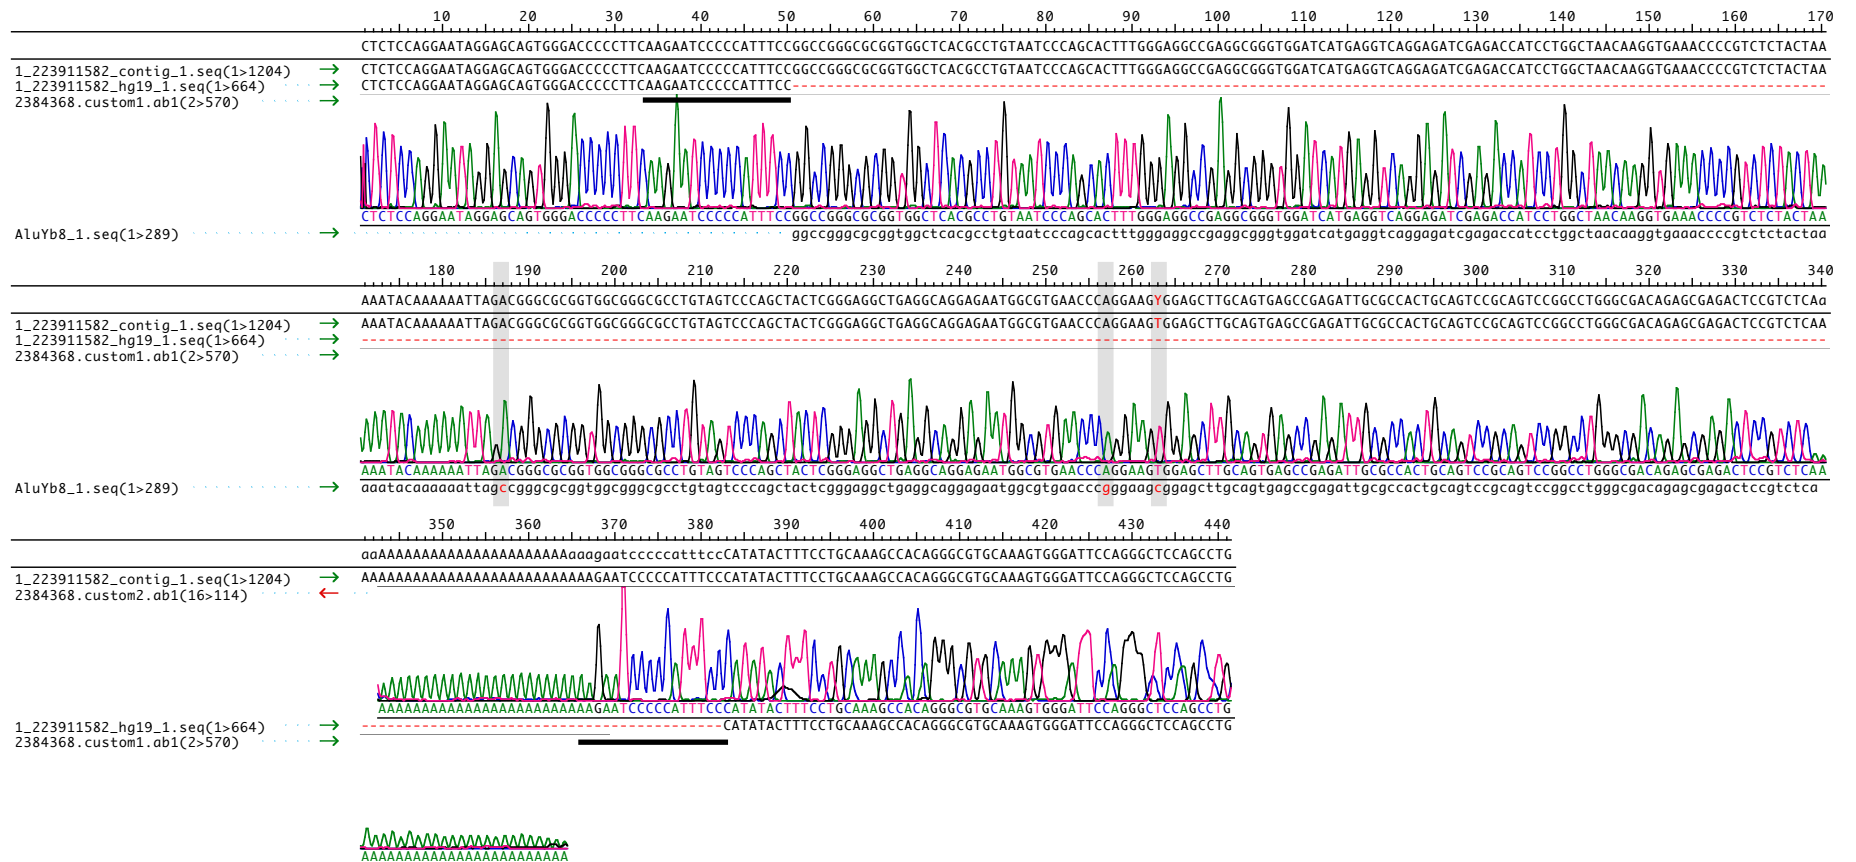

Figure S5.27







A.

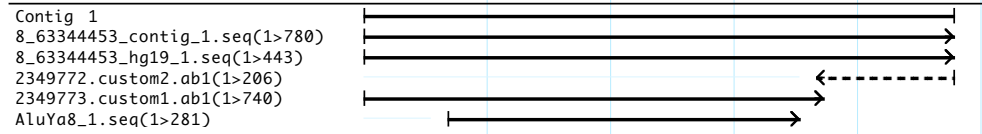

C.

not genotyped

siteID: chr8\_63344453  
sample sequenced: HGDP01259  
Alu subfamily: AluYa8

B.

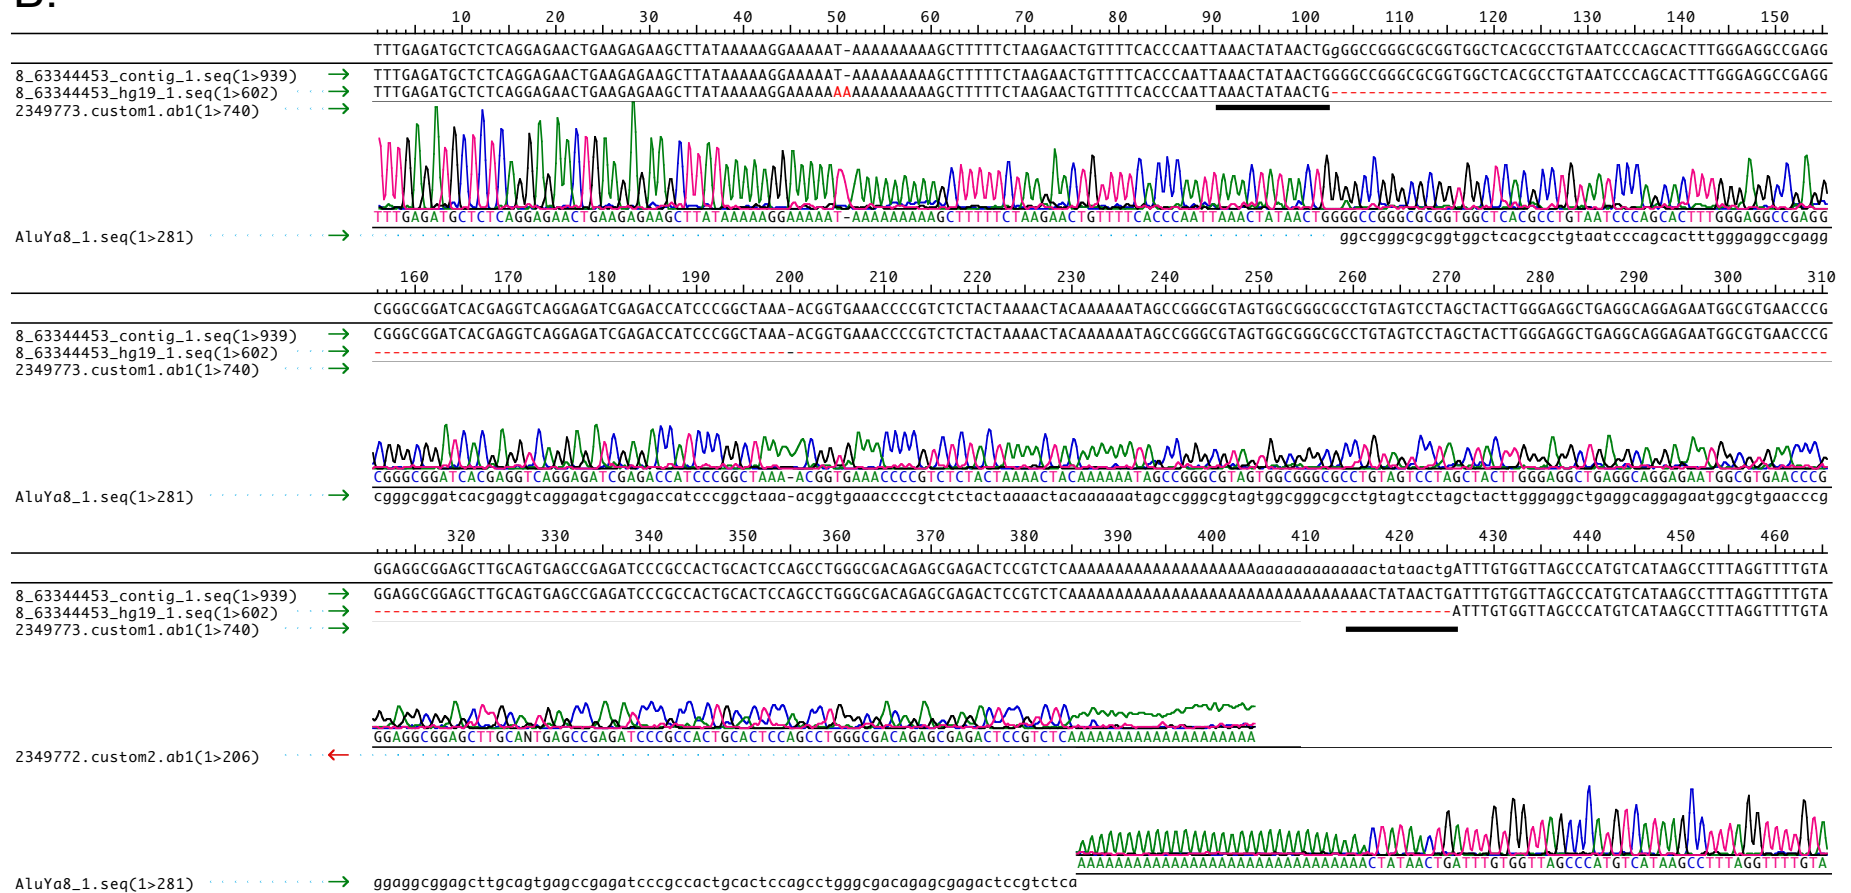

Figure S5.29

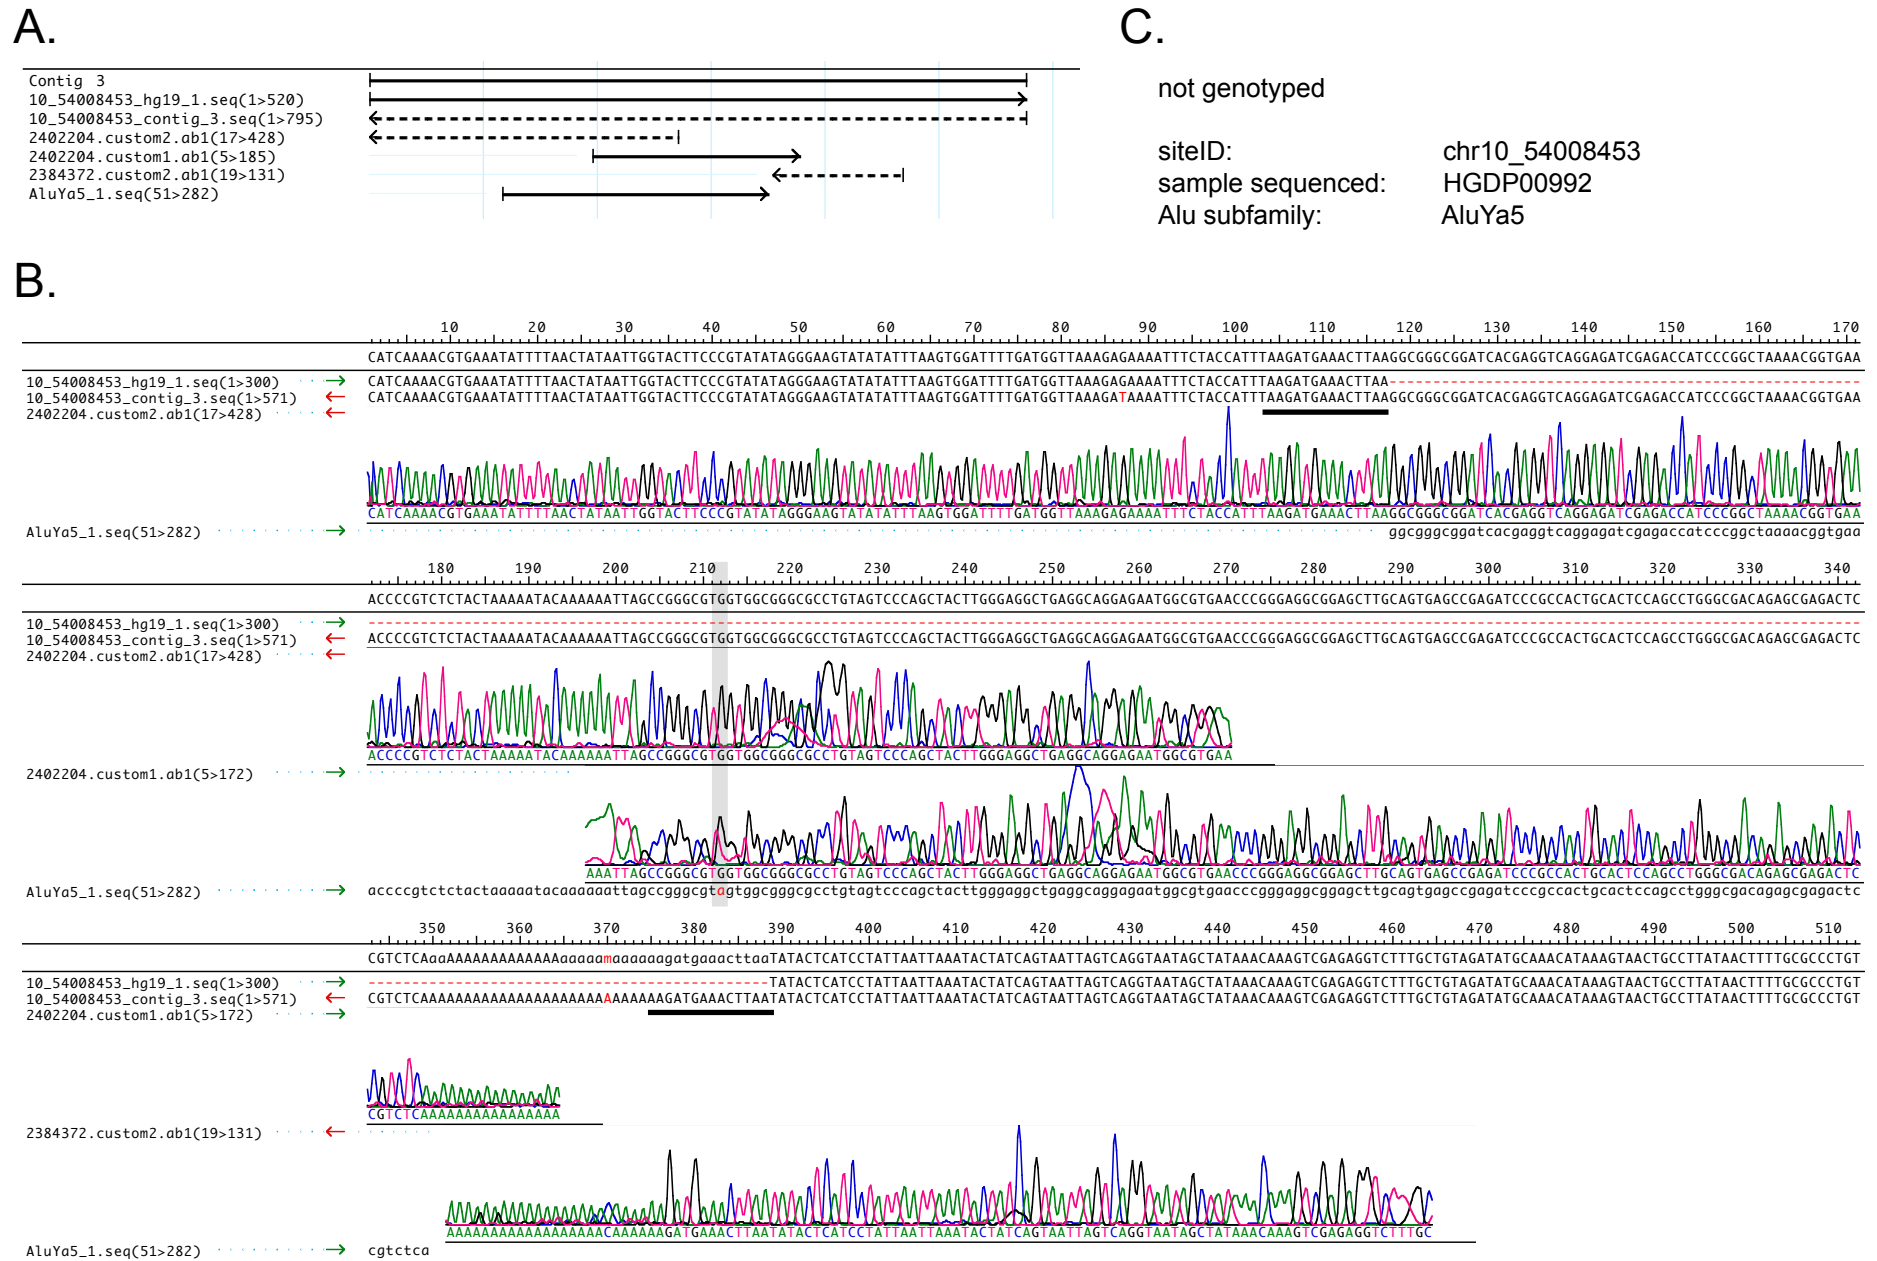

**Figure S5.30**



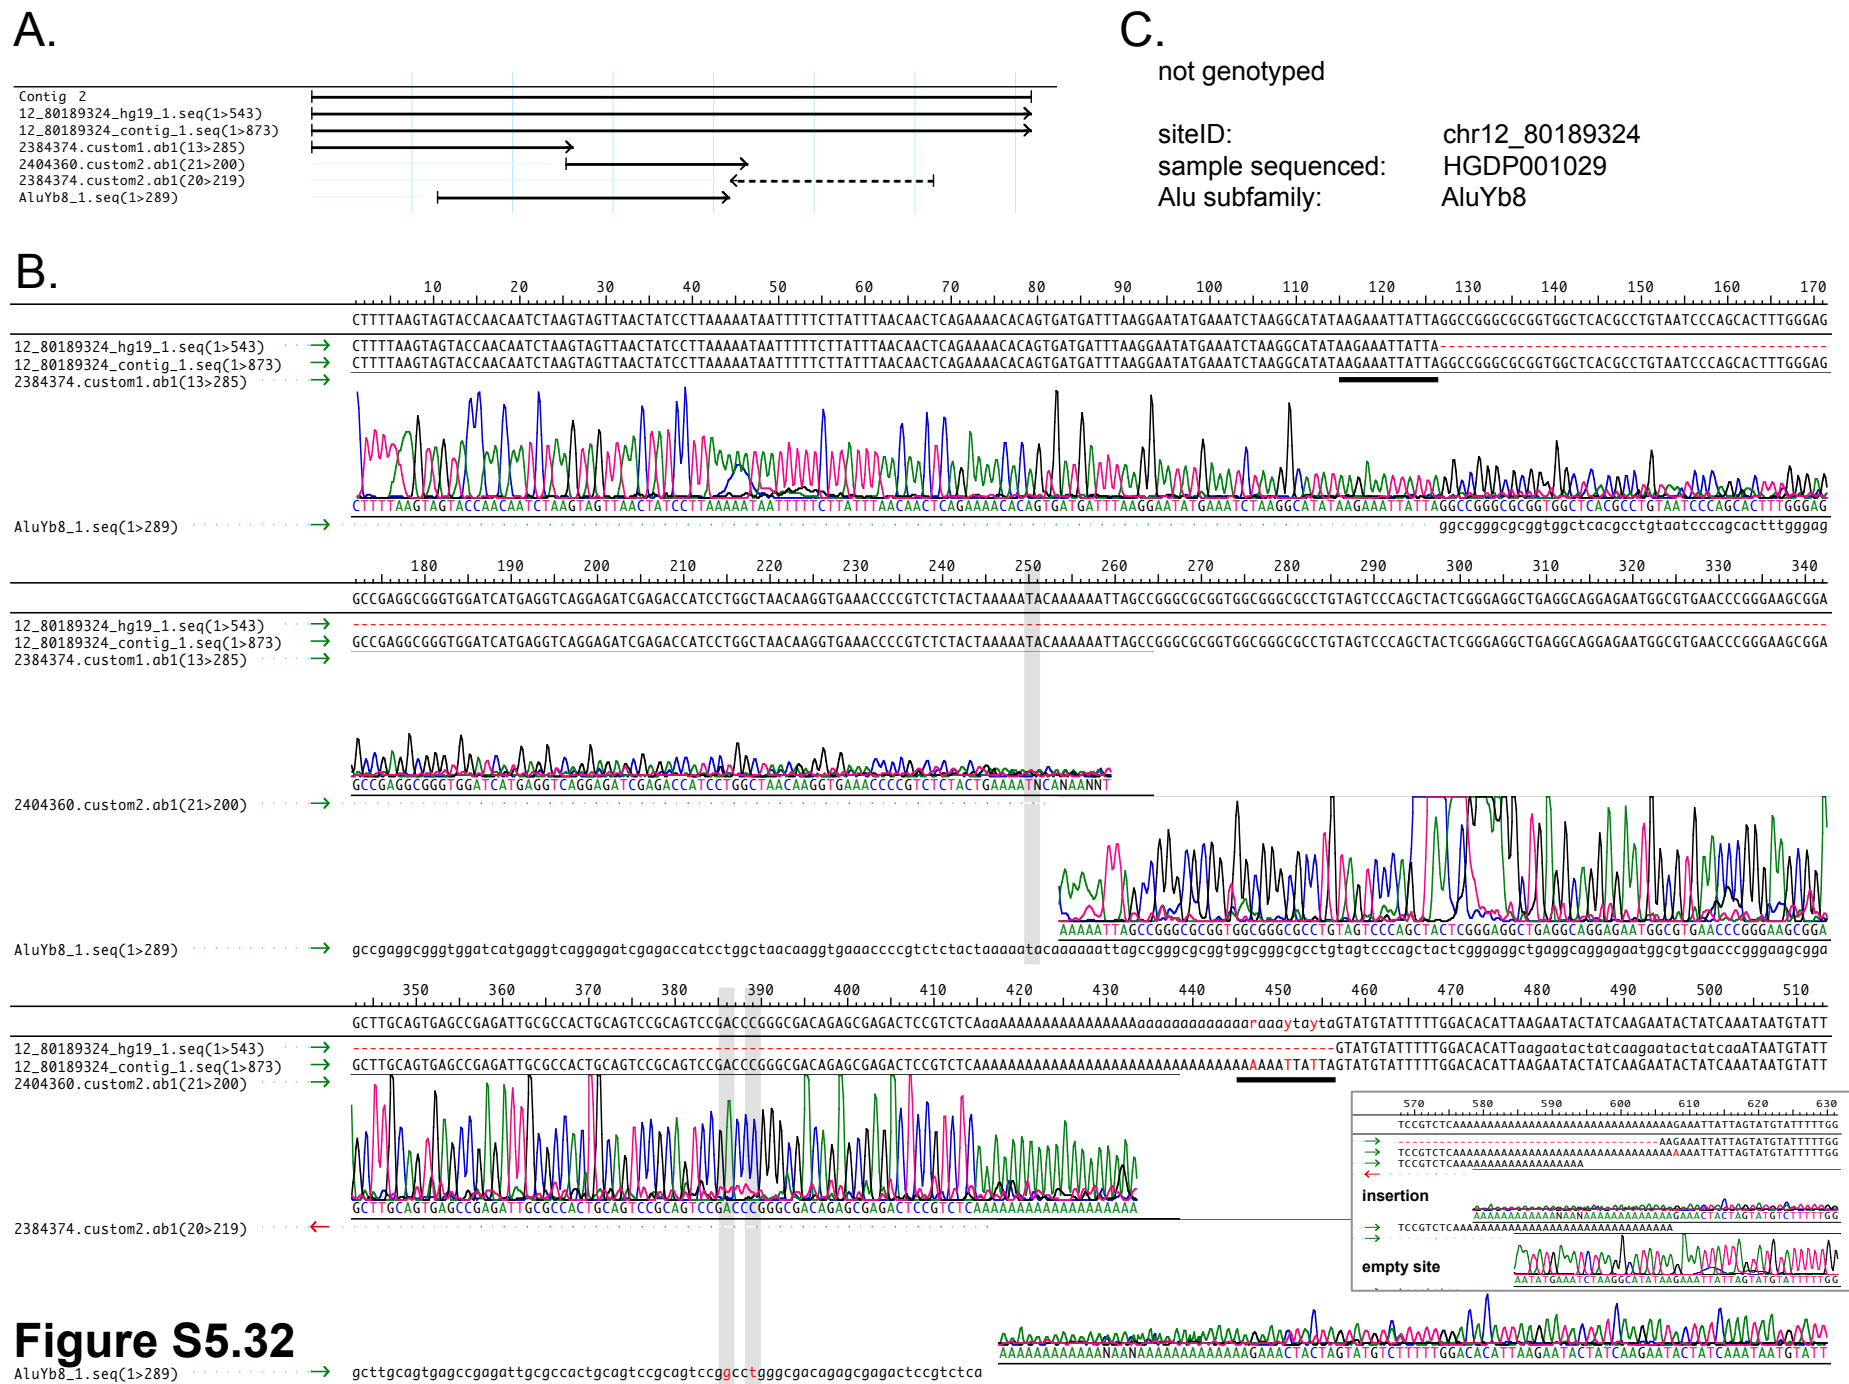

Supplement: supp_gkv1089_nar-01397-h-2015-File010.pdf [file supp_gkv1089_nar-01397-h-2015-File010.pdf]
