# Supplementary material for: Discovery and characterization of Alu repeat sequences via precise local read assembly
Source: PubMed Central journal article supplement (PMC4666360; doi:10.1093/nar/gkv1089), 2015-10-25

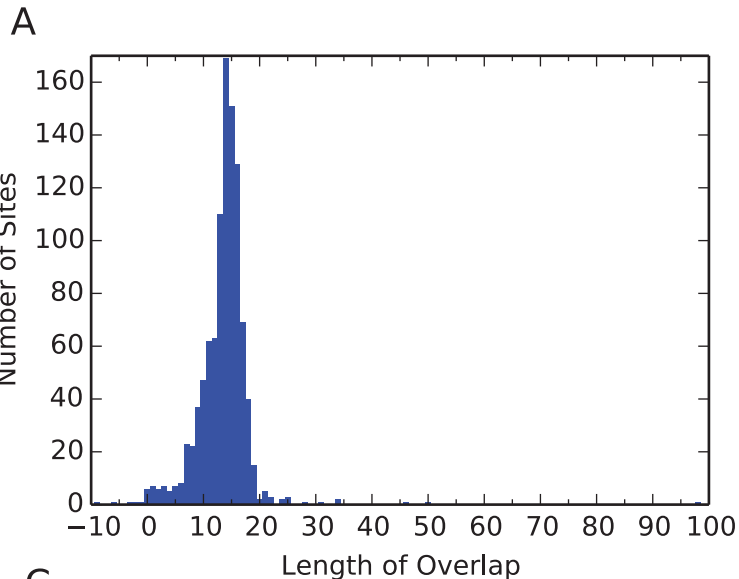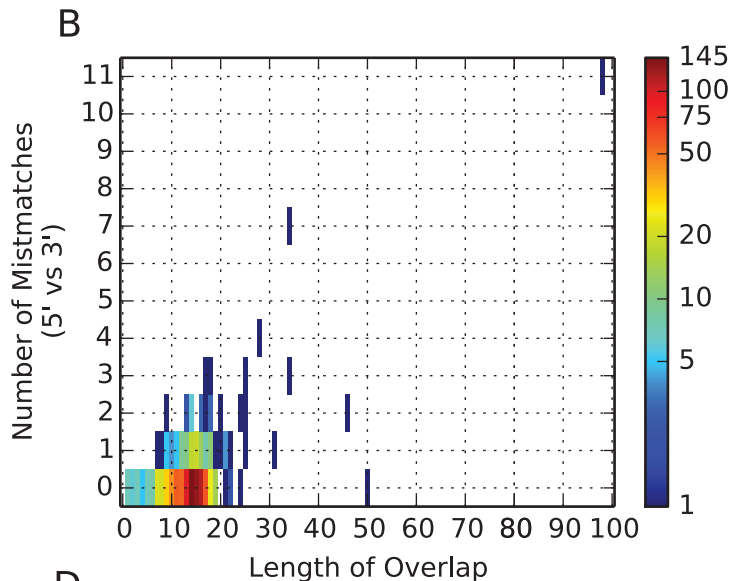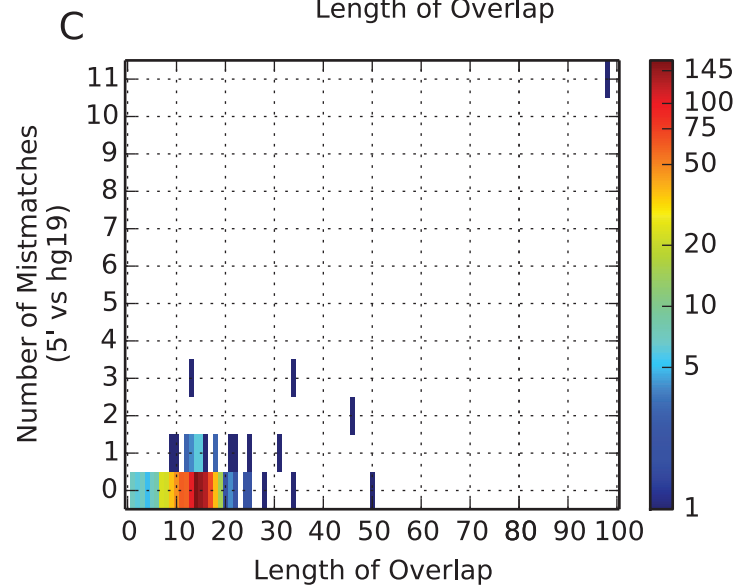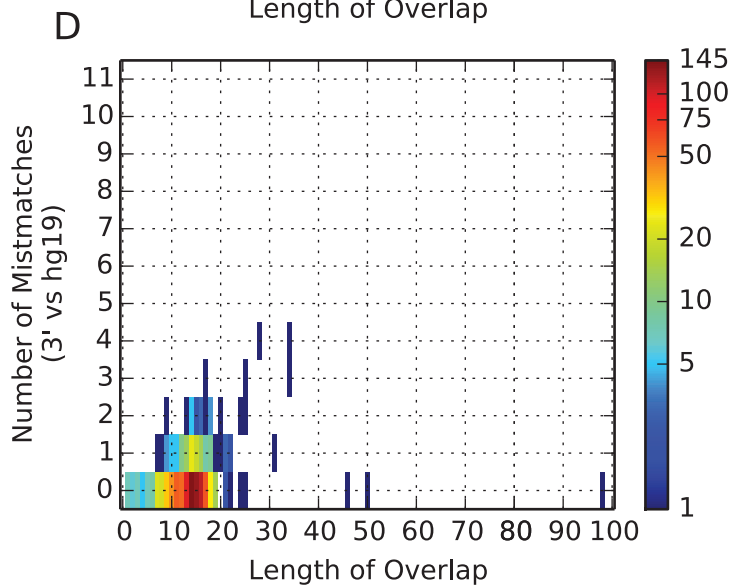

Supplement: supp_gkv1089_nar-01397-h-2015-File007.pdf [file supp_gkv1089_nar-01397-h-2015-File007.pdf]
