# Supplementary material for: Discovery and characterization of Alu repeat sequences via precise local read assembly
Source: PubMed Central journal article supplement (PMC4666360; doi:10.1093/nar/gkv1089), 2015-10-25
Supplement: supp_gkv1089_nar-01397-h-2015-File009.pdf [file supp_gkv1089_nar-01397-h-2015-File009.pdf]

A.

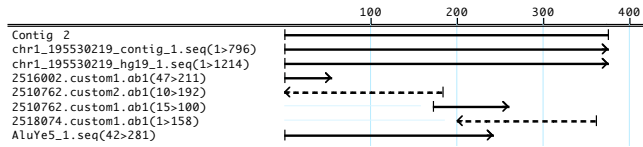

B.

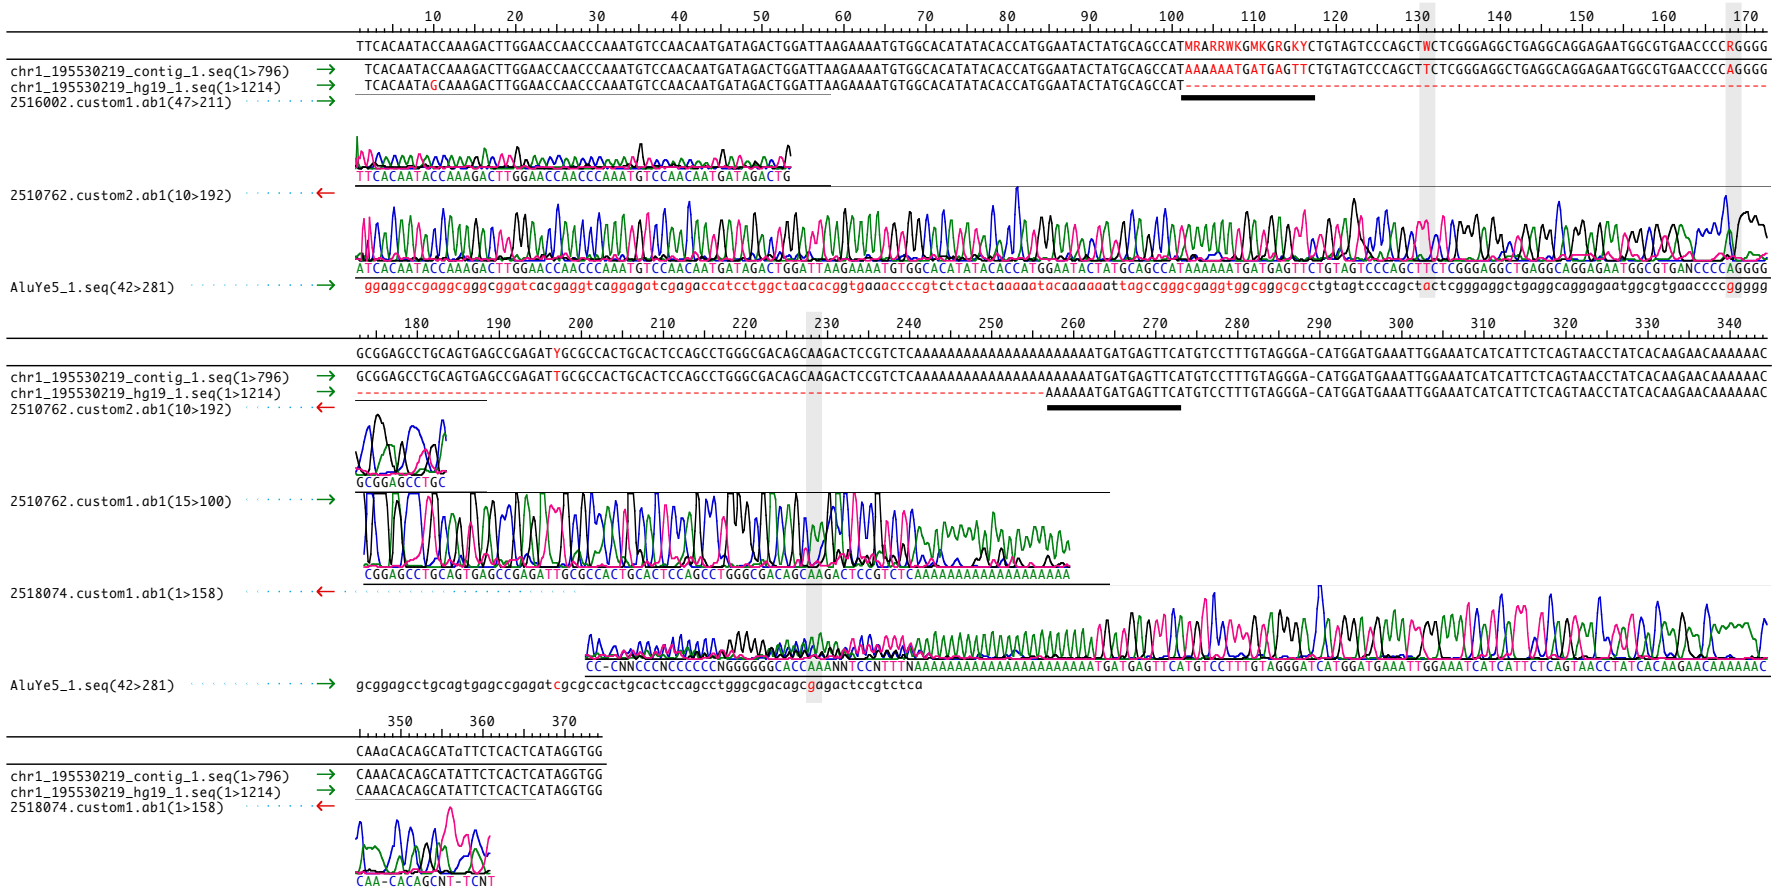

C.

genotyped

siteID: chr1\_195530219  
 sample sequenced: HGDP00213  
 Alu subfamily: AluYe5

Figure S4.1



A.

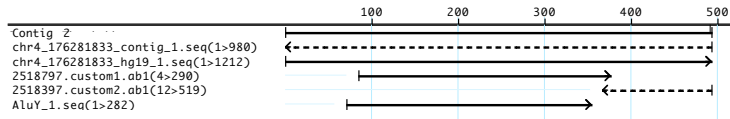

B.

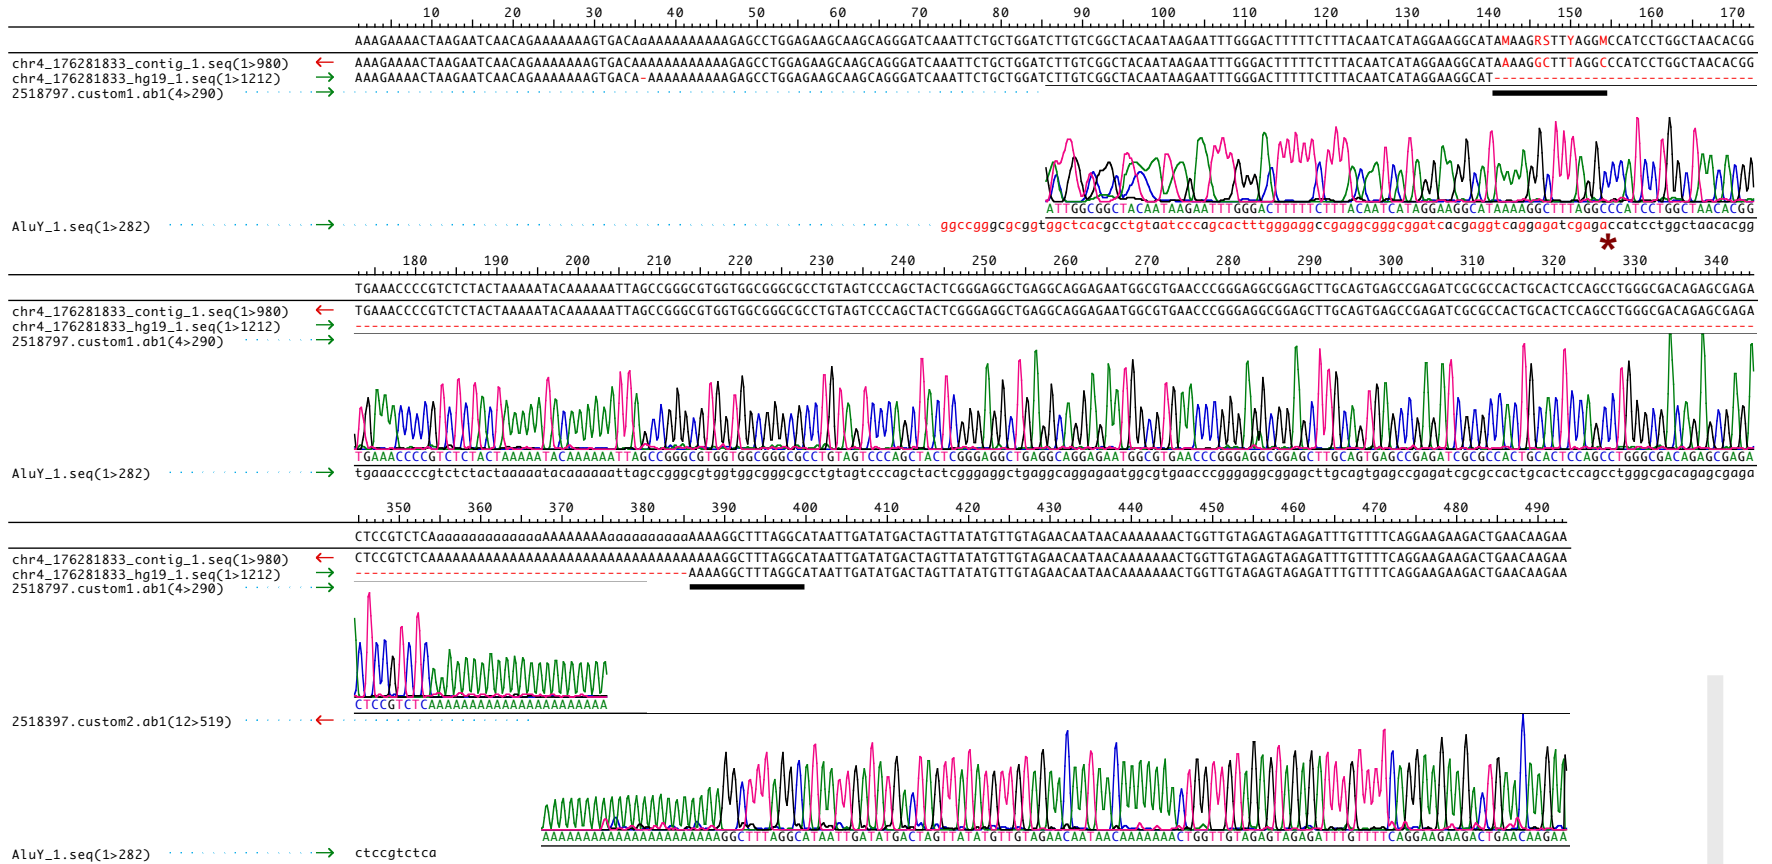

Figure S4.3

C.

genotyped

siteID: chr4\_176281833  
sample sequenced: HGDP00711  
Alu subfamily: AluY



A.

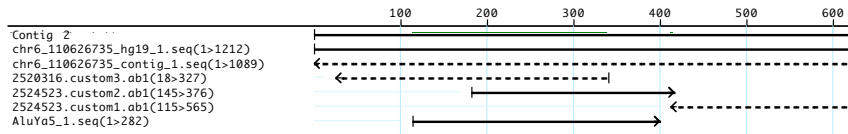

B.

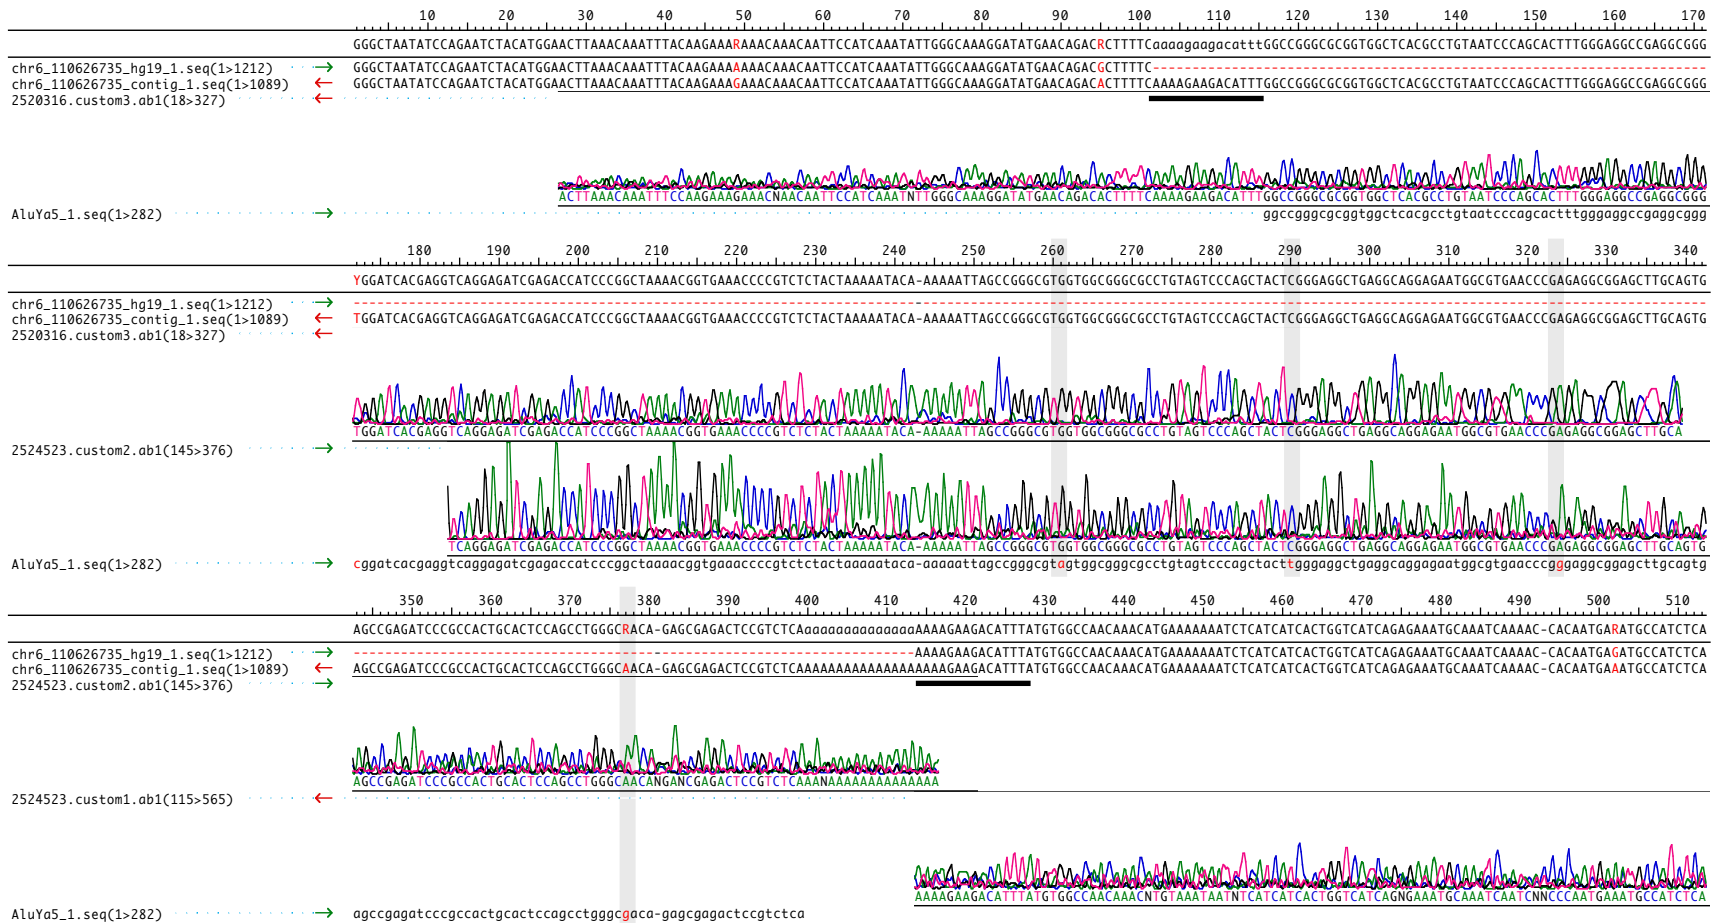

C.

genotyped

siteID: chr6\_110626735  
 sample sequenced: HGDP00877  
 Alu subfamily: unclassified

Figure S4.5

A.

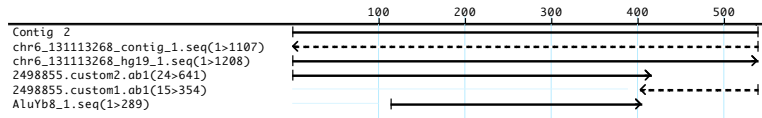

C.

genotyped

siteID: chr6\_131113268  
 sample sequenced: HGDP00232  
 Alu subfamily: AluYb8

B.

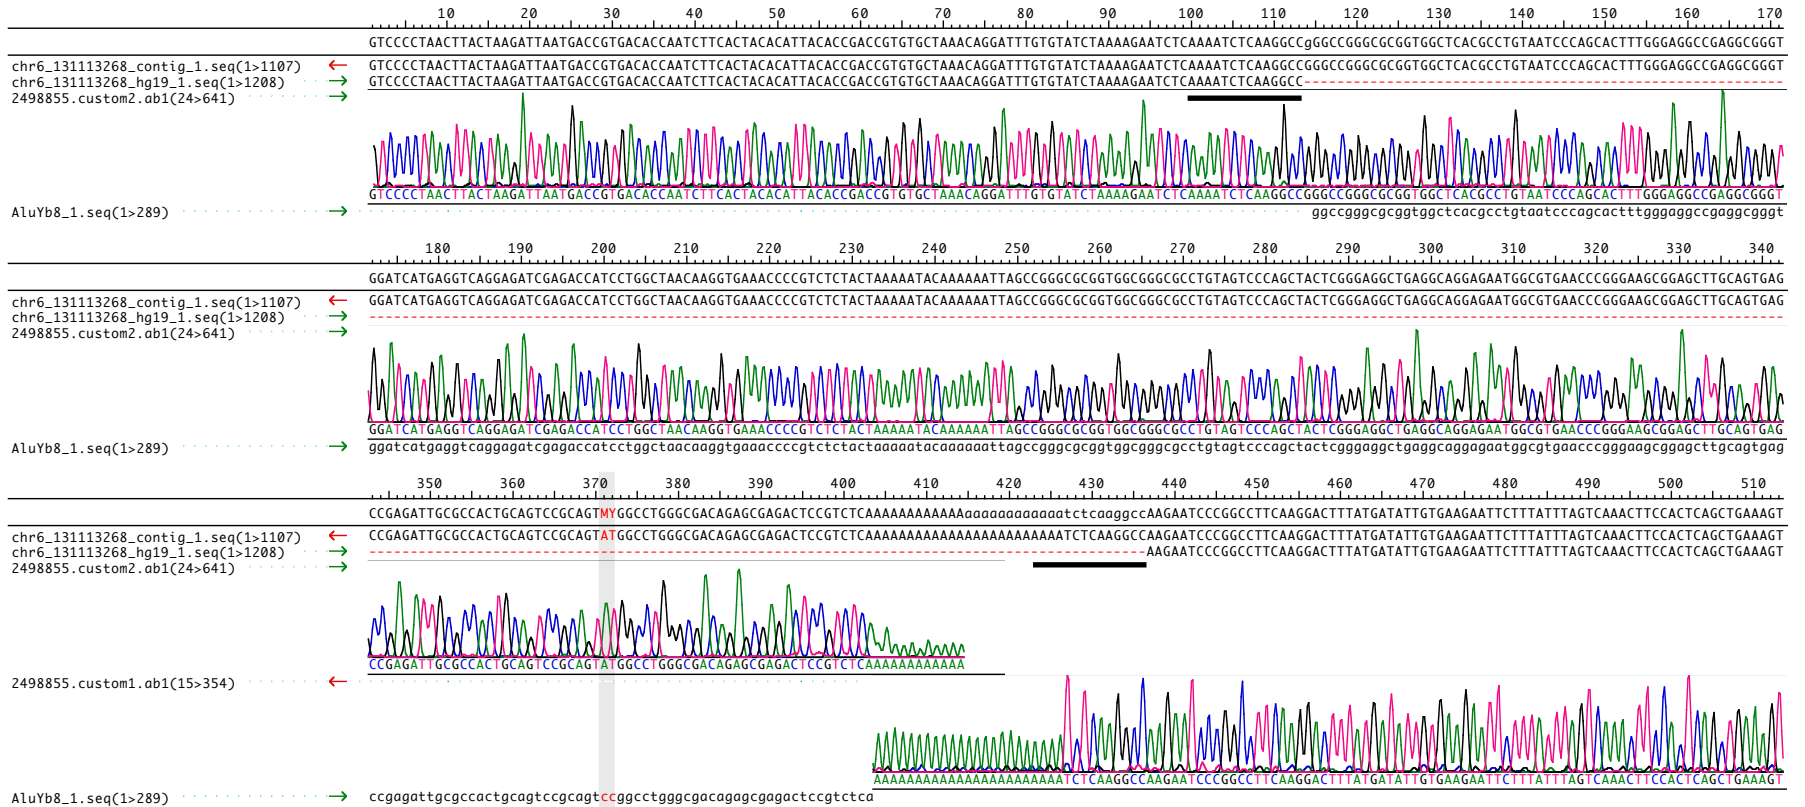

Figure S4.6

A.

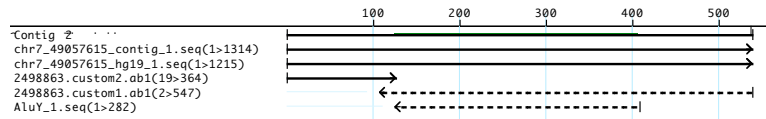

C.

genotyped

siteID: chr7\_49057615  
 sample sequenced: HGDP00711  
 Alu subfamily: AluYc1

B.

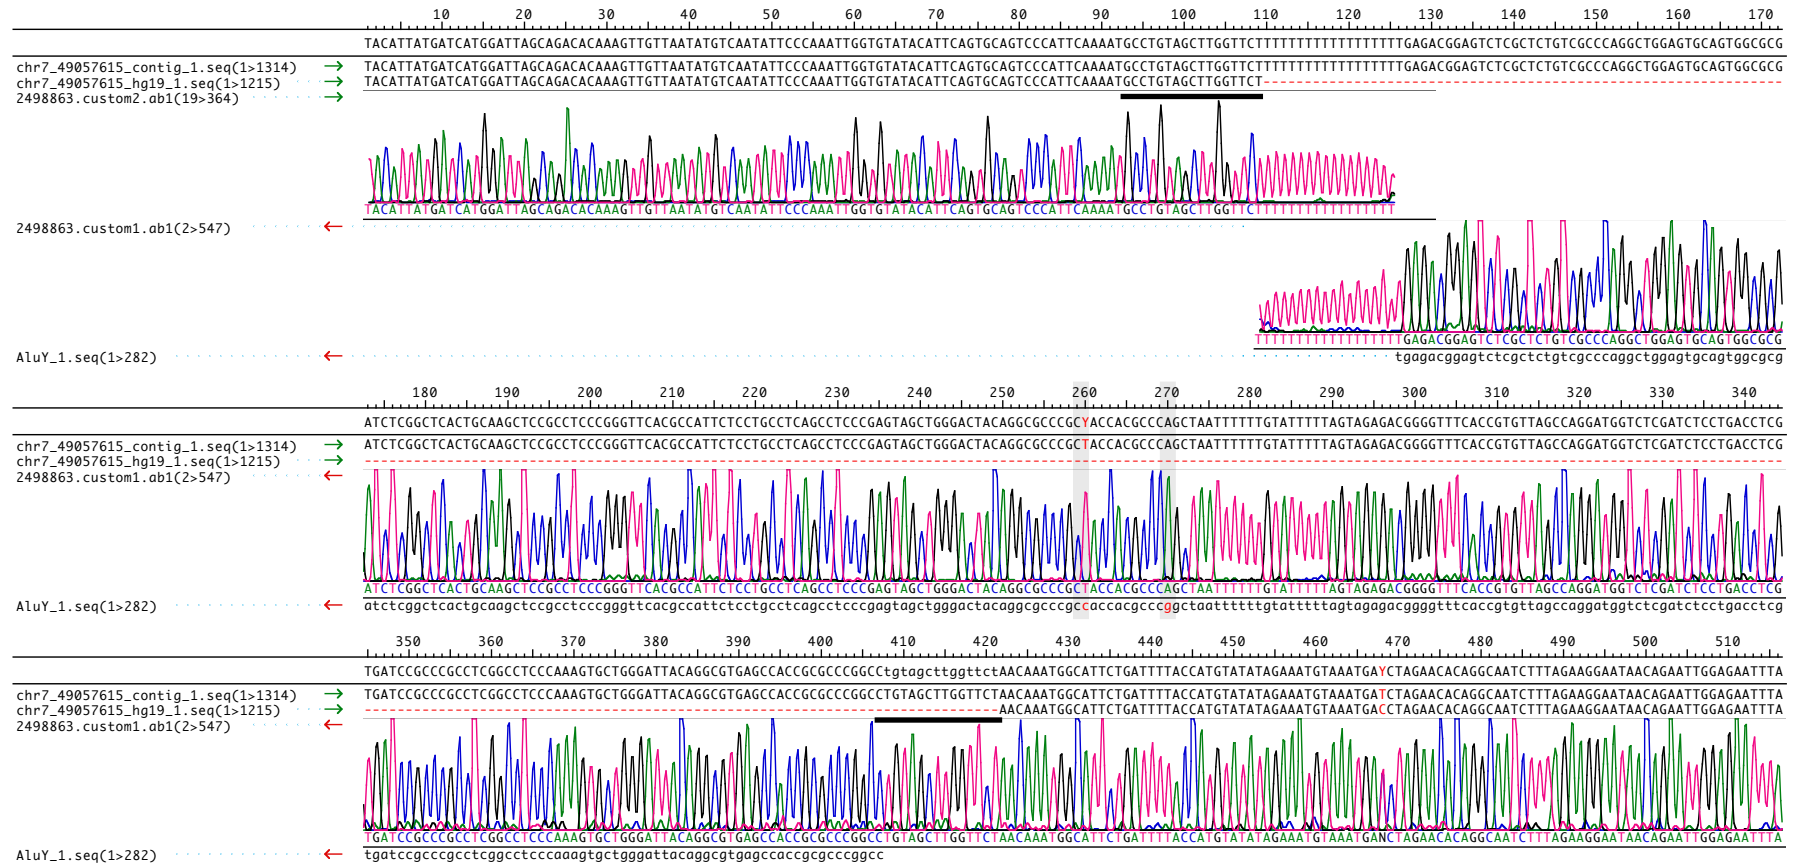

Figure S4.7







A.

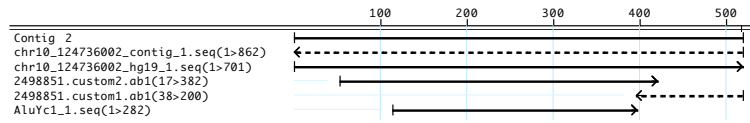

B.

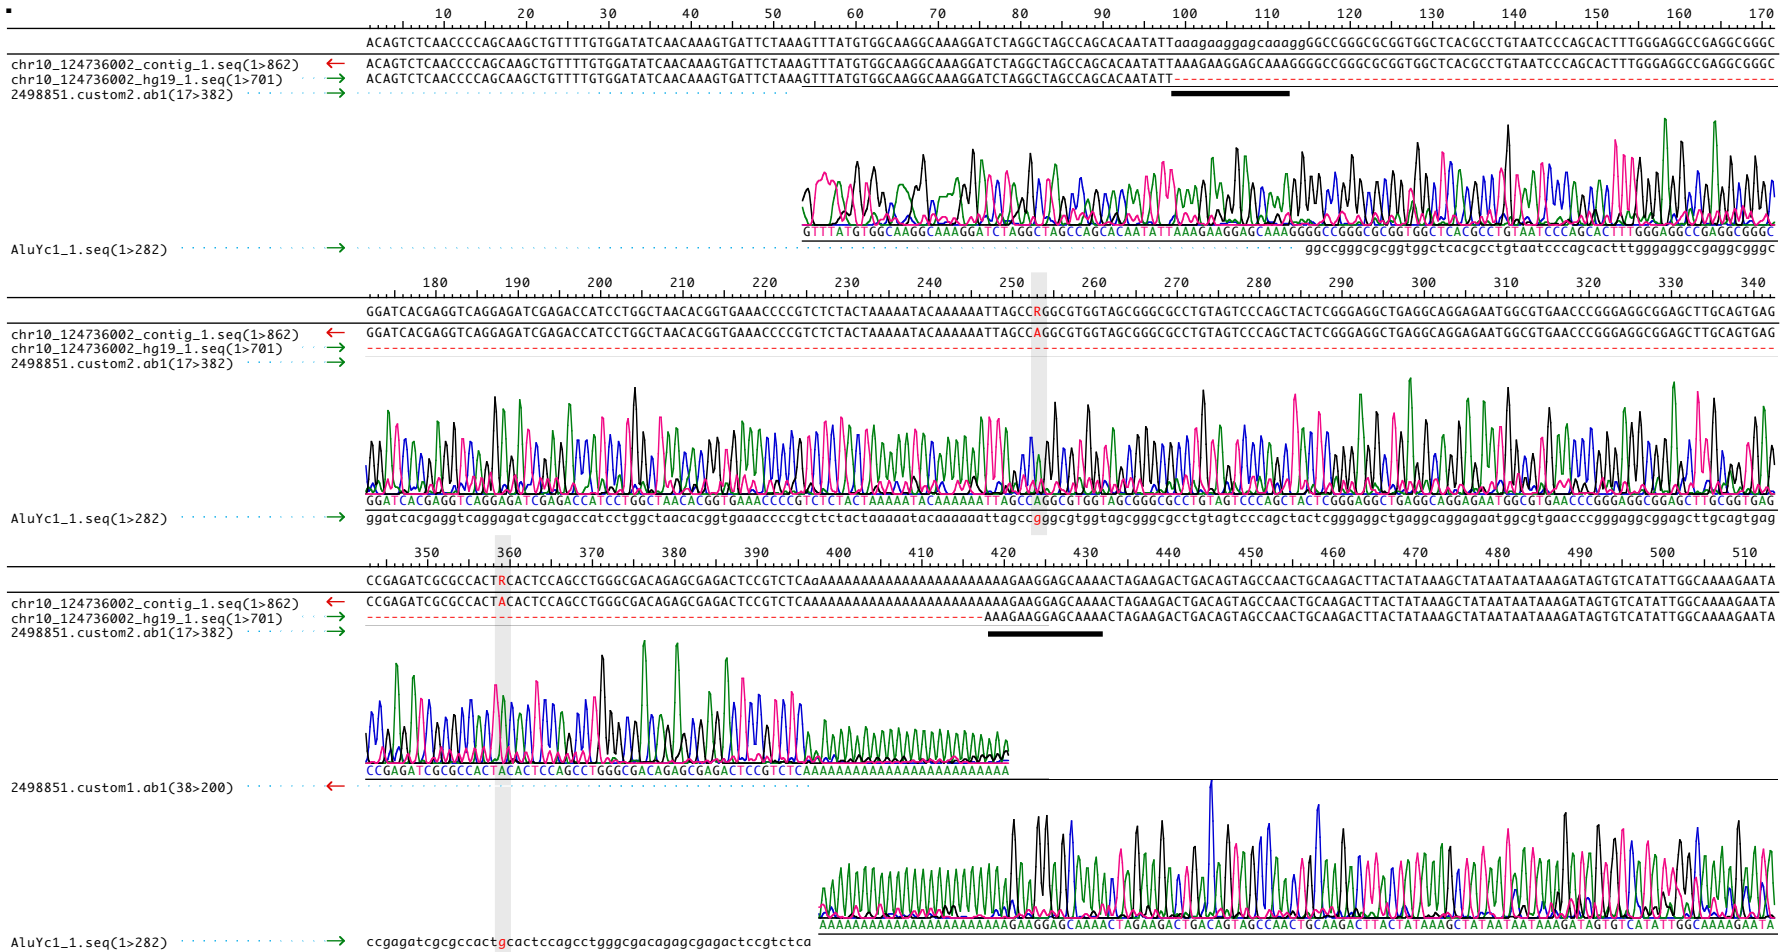

C.

genotyped

siteID: chr10\_124736002

sample sequenced: HGDP00222

Alu subfamily: AluYc1

Figure S4.9

A.

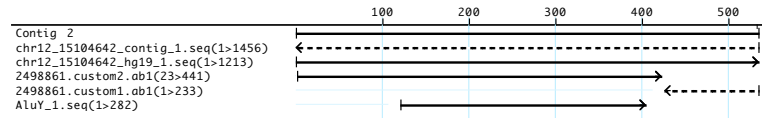

B.

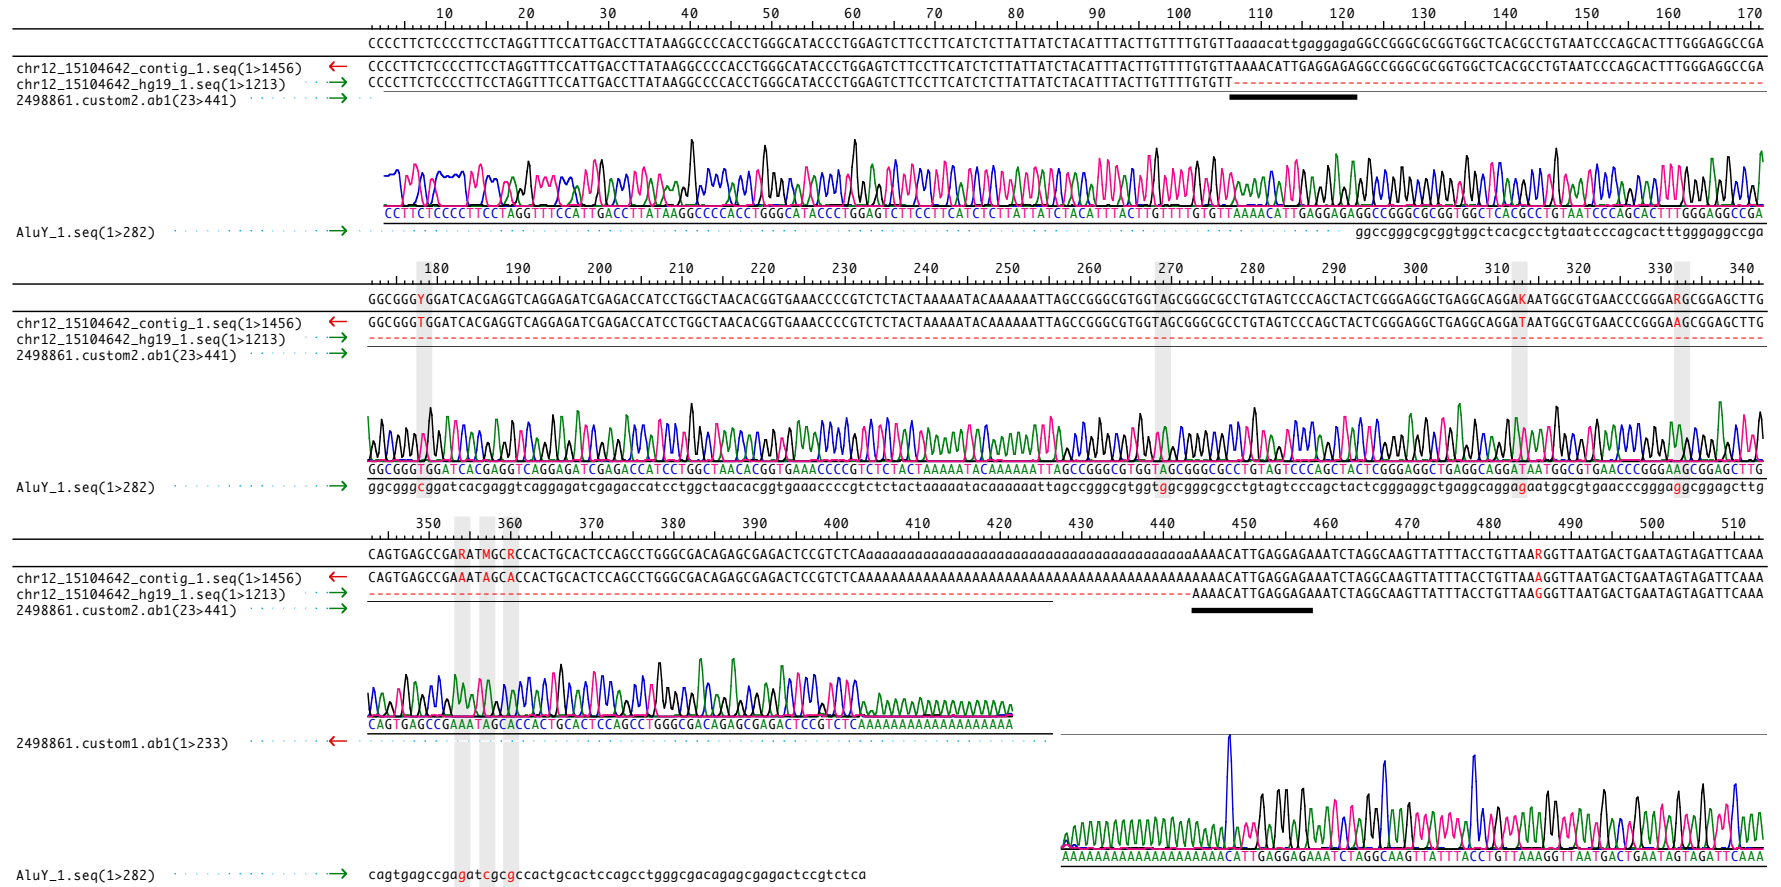

C.

genotyped

siteID: chr12\_15104642  
 sample sequenced: HGDP00471  
 Alu subfamily: AluYc1

Figure S4.10

A.

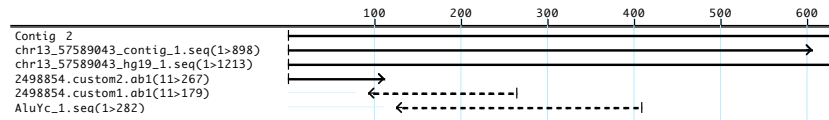

C.

genotyped

siteID: chr13\_57589043  
 sample sequenced: HGDP00877  
 Alu subfamily: unclassified

B.

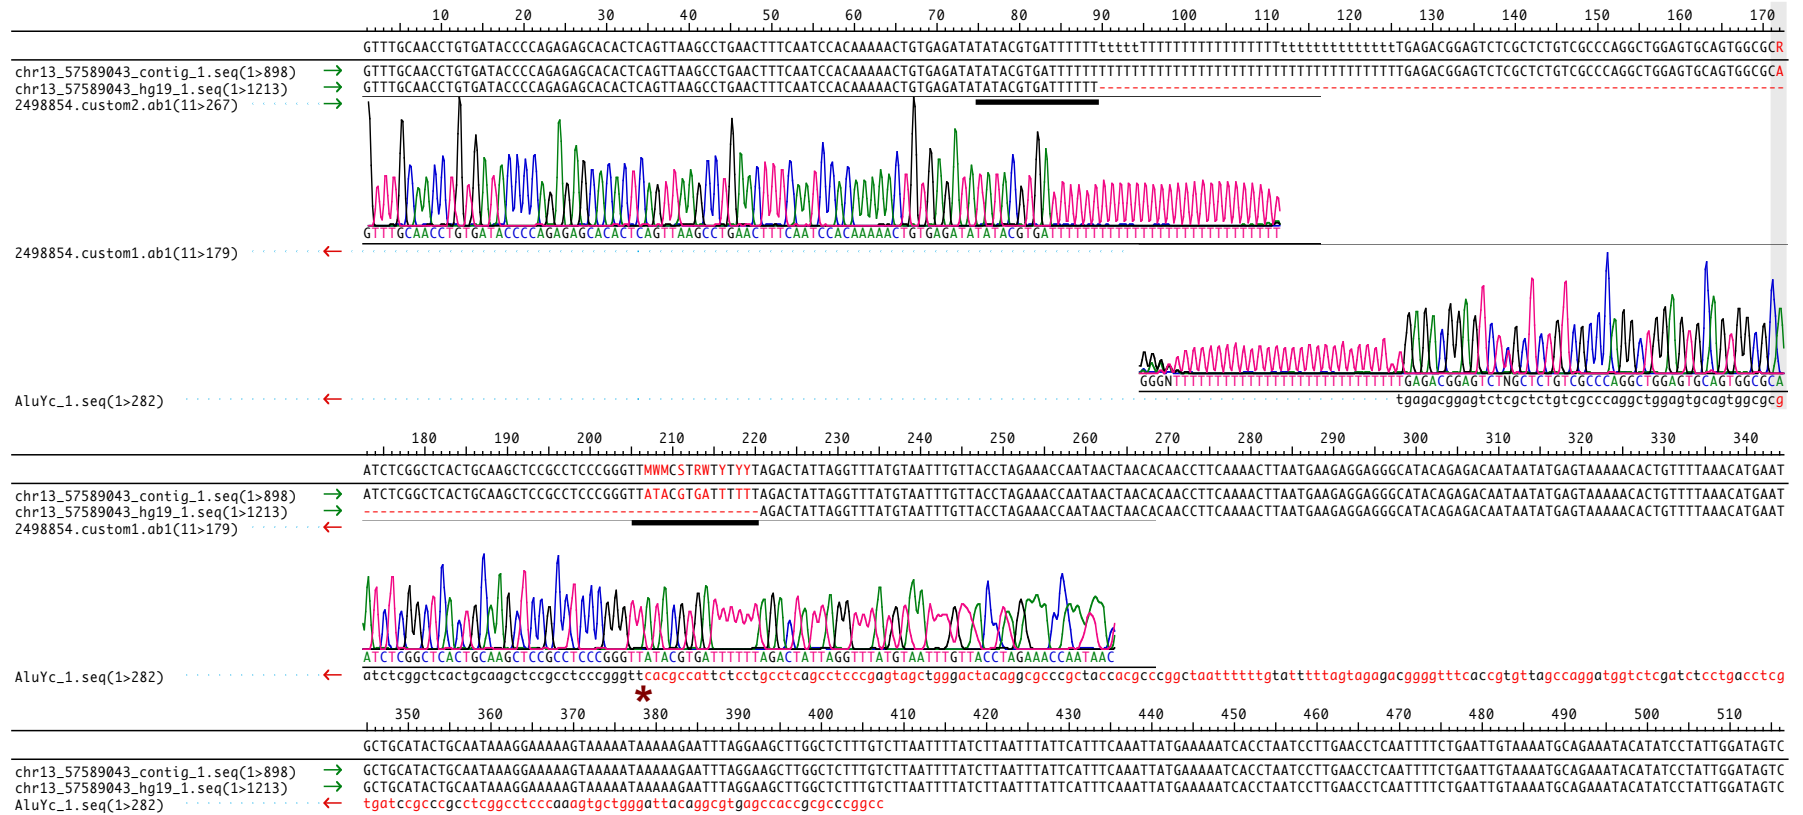

Figure S4.11

A.

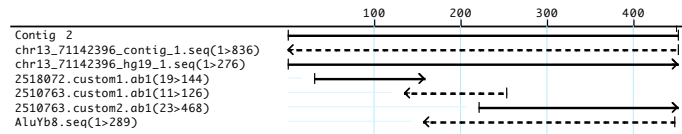

B.

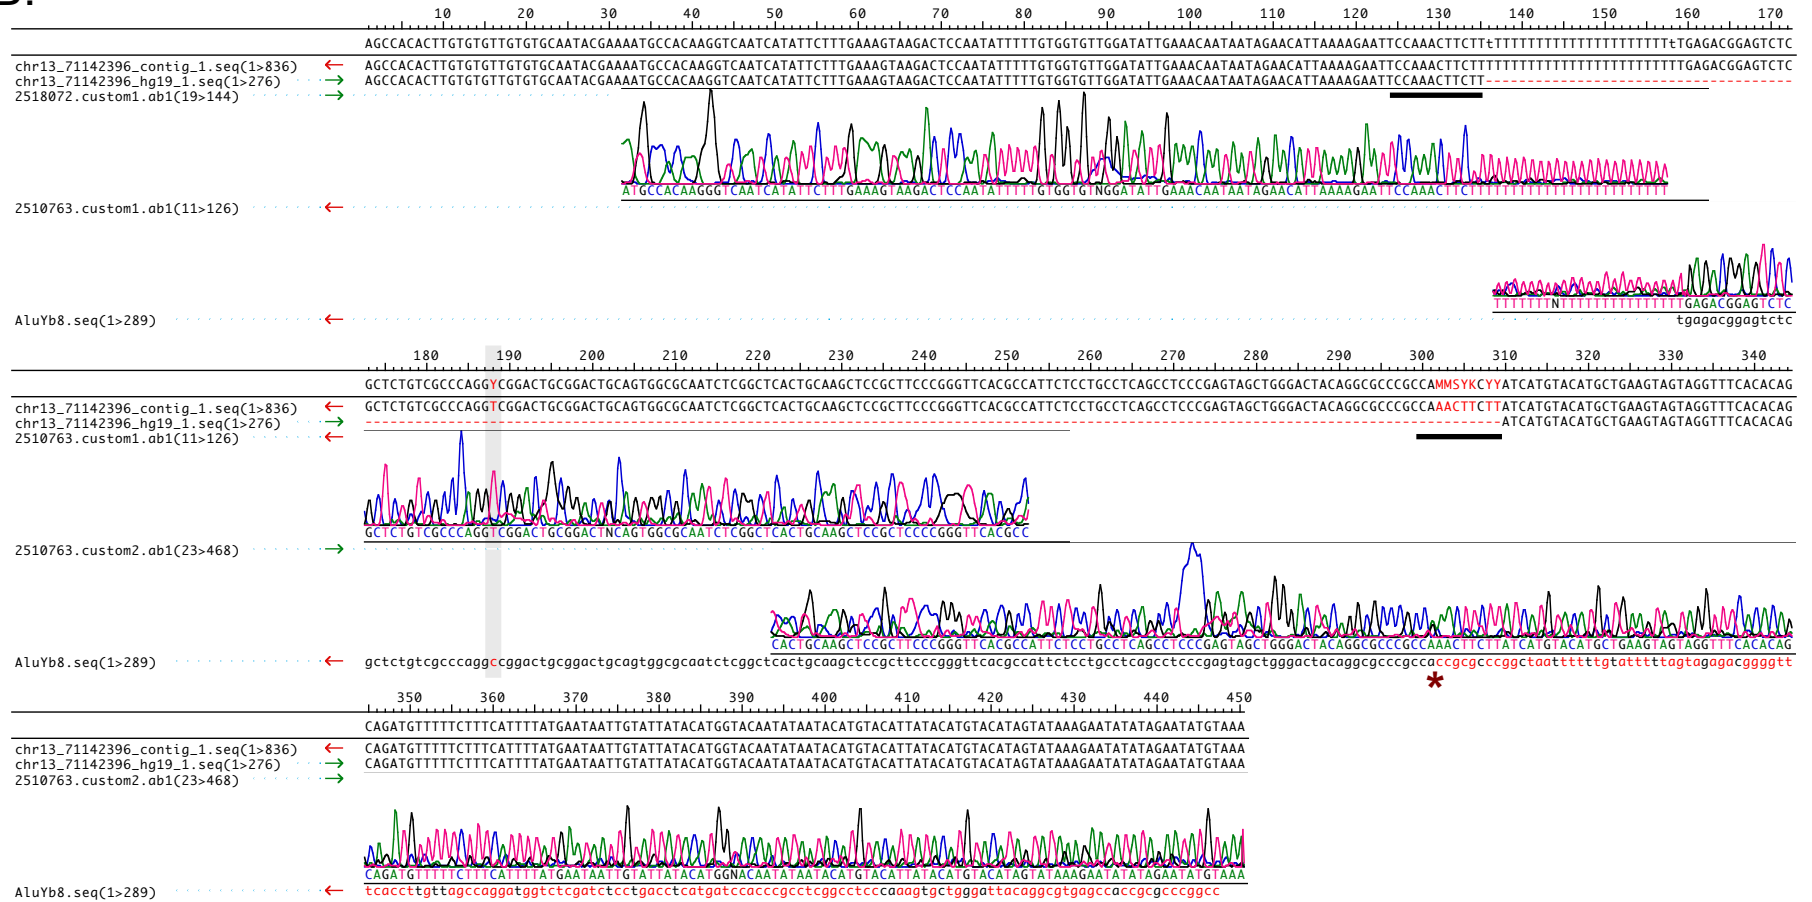

C.

genotyped

siteID: chr13\_71142396  
 sample sequenced: HGDP00213  
 Alu subfamily: AluYb8

Figure S4.12

A.

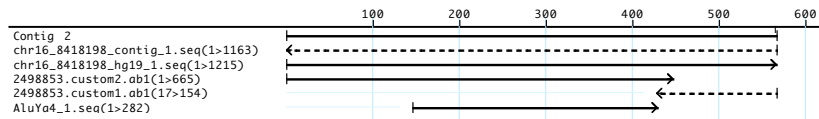

B.

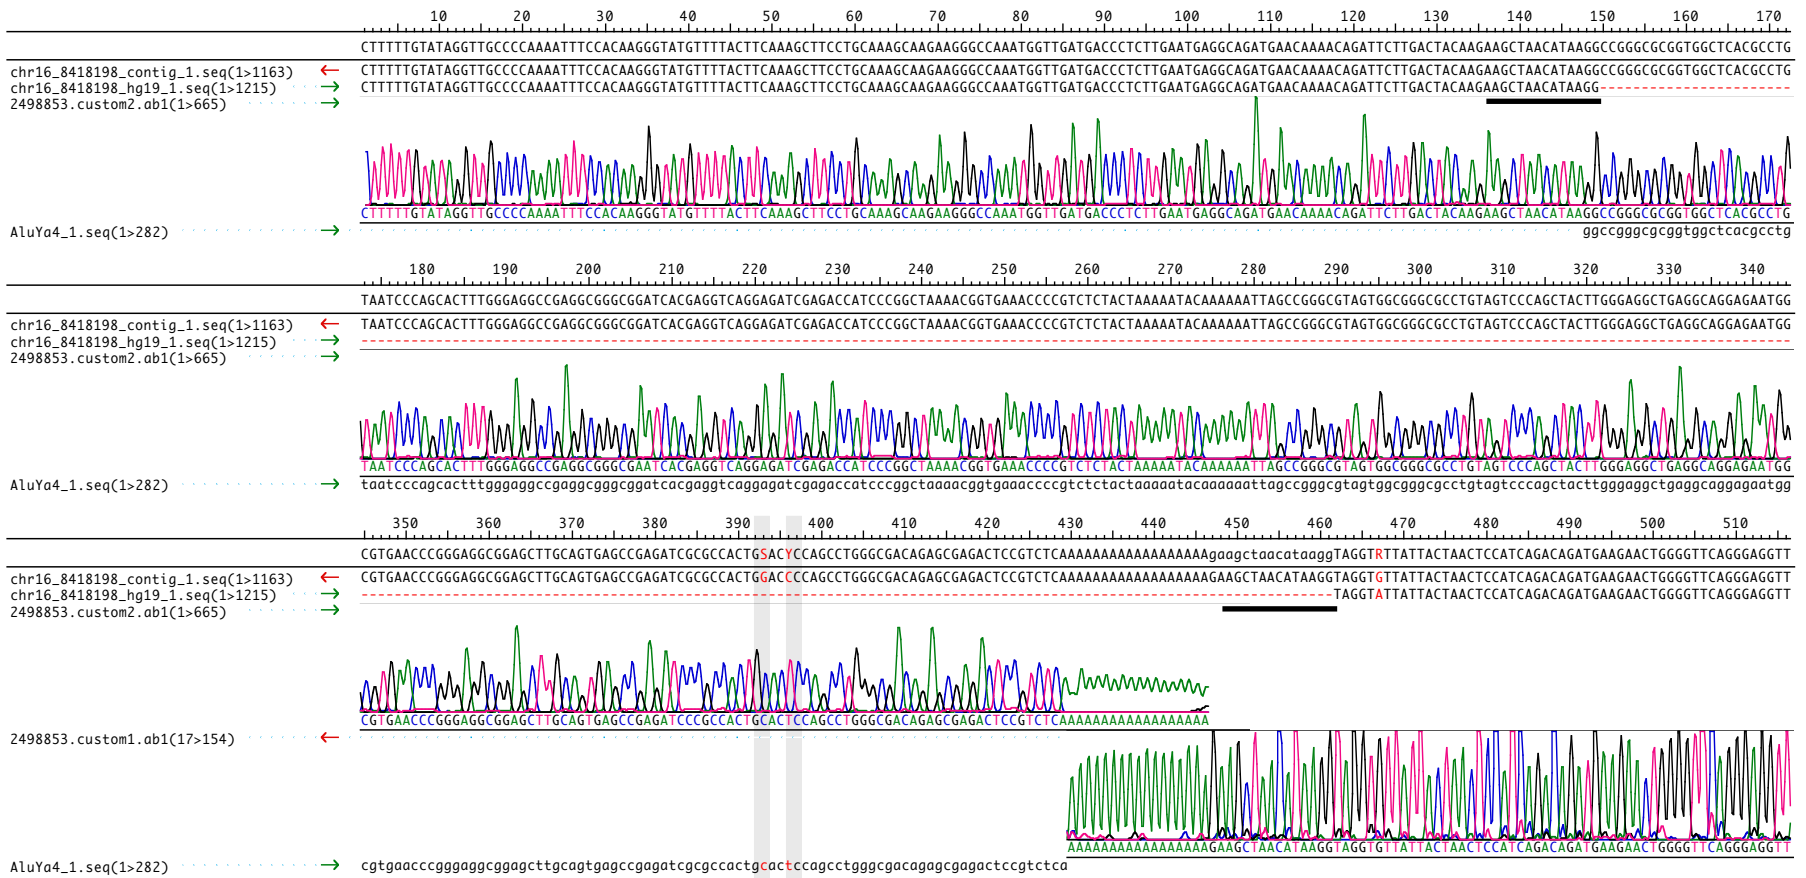

Figure S4.13

C.

genotyped

siteID: chr16\_8418198  
sample sequenced: HGDP00721  
Alu subfamily: AluYa4

A.

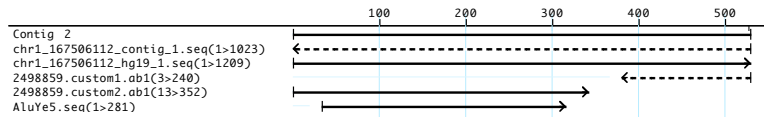

C.

not genotyped

siteID: chr1\_167506112  
sample sequenced: HGDP00959  
Alu subfamily: AluYe5

B.

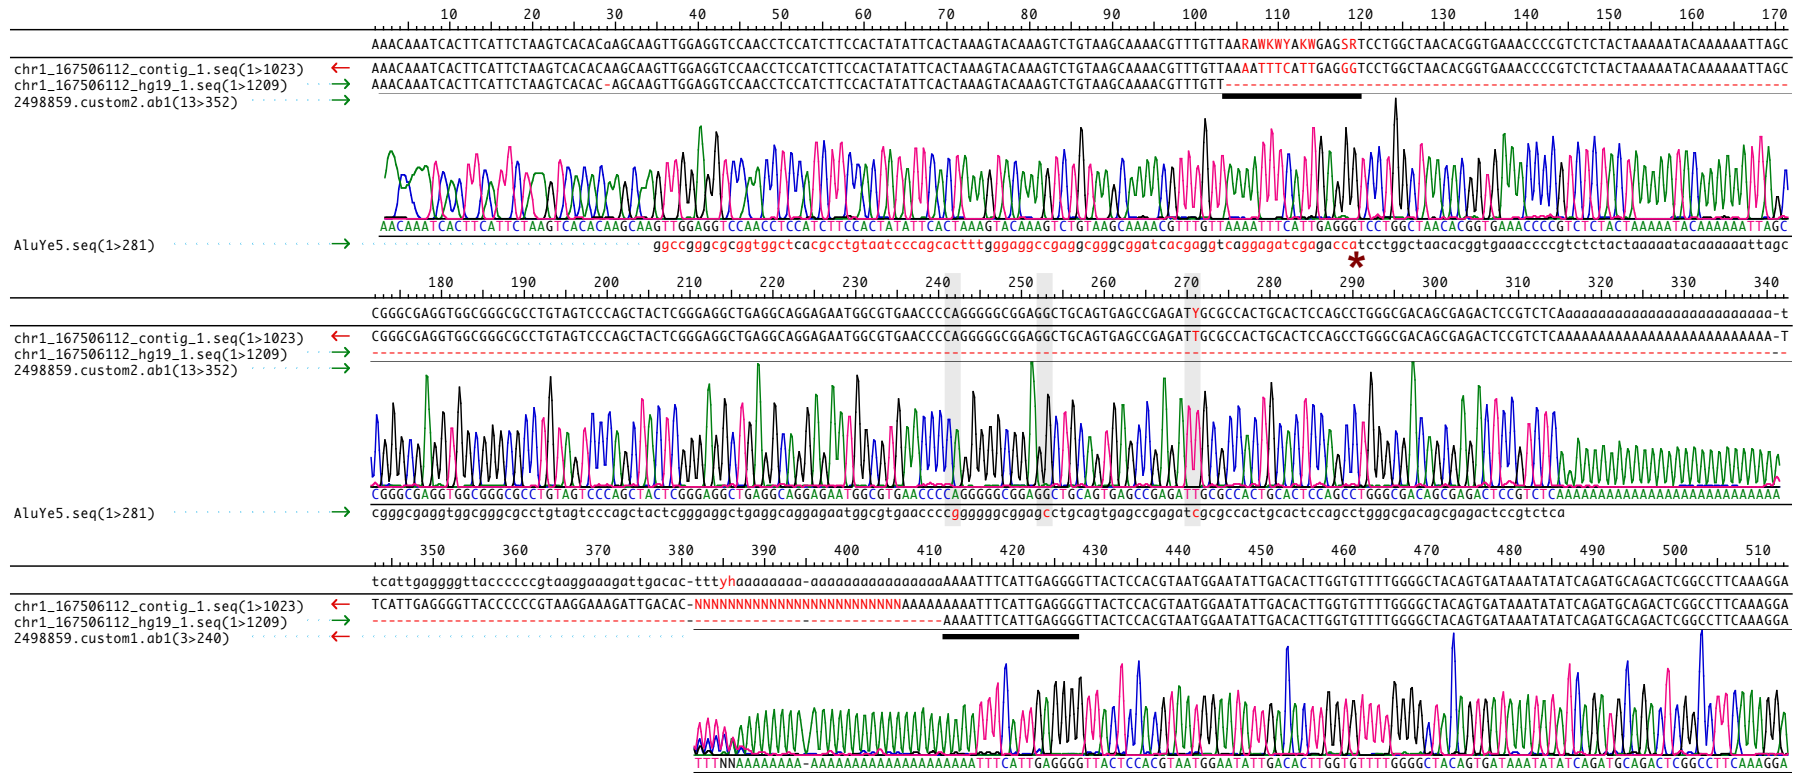

Figure S4.14

A.

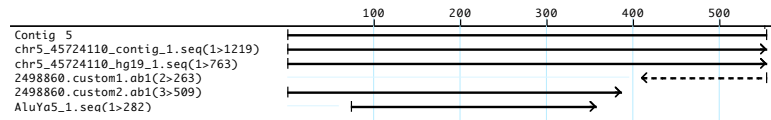

C.

not genotyped

siteID: chr5\_45724110  
 sample sequenced: HGDP00856  
 Alu subfamily: AluYa5

B.

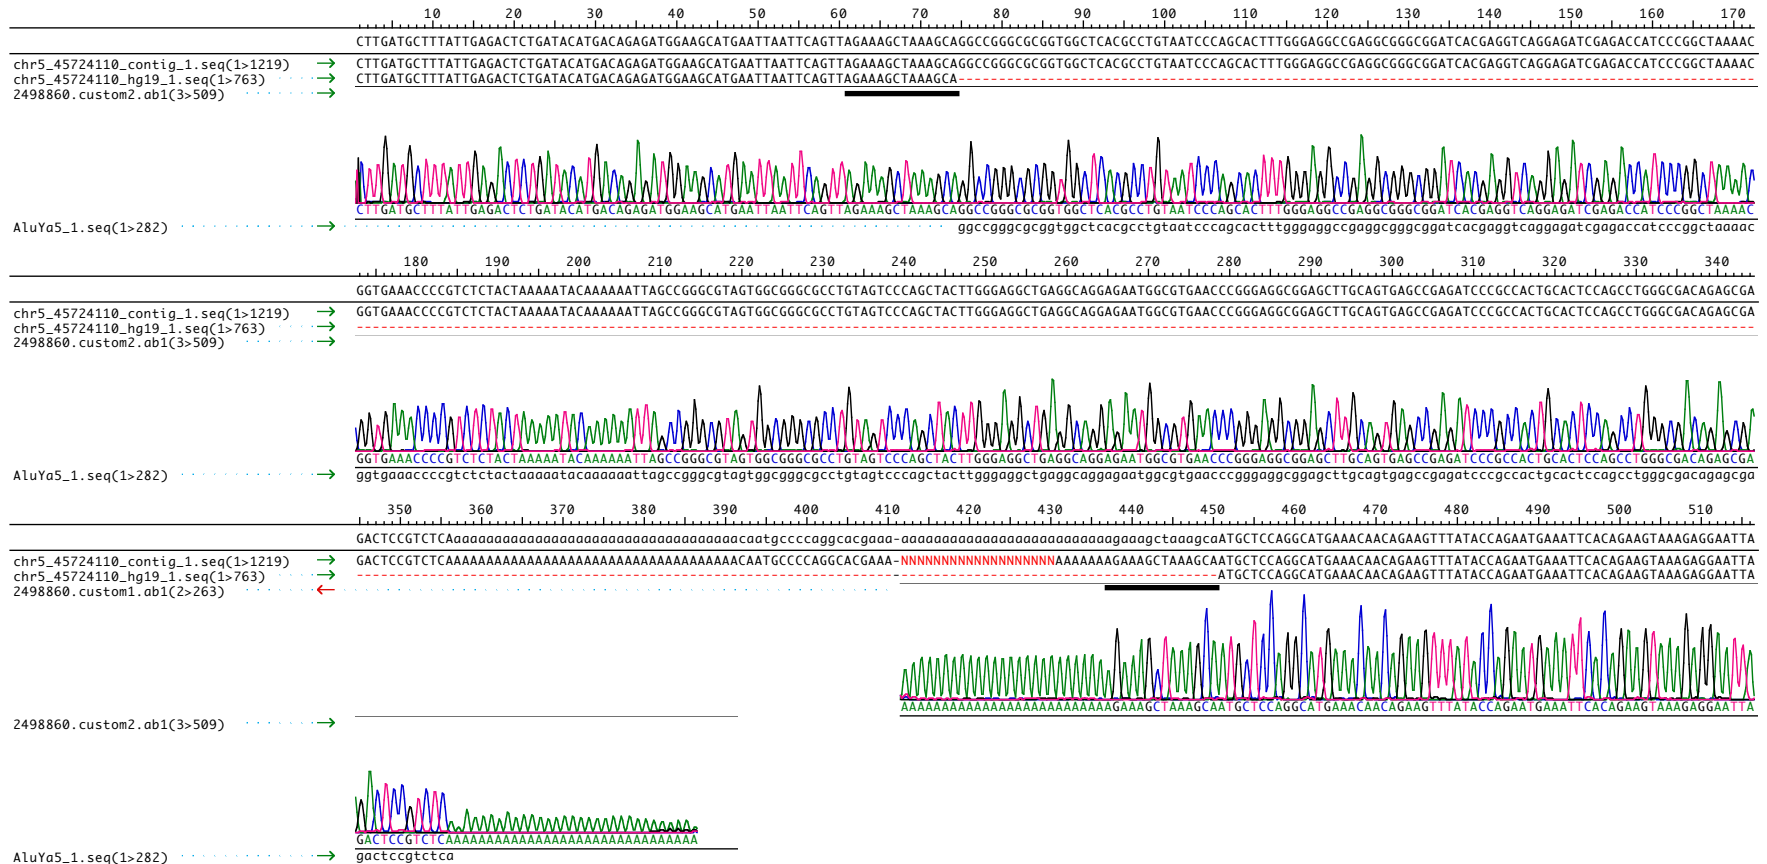

Figure S4.15





A.

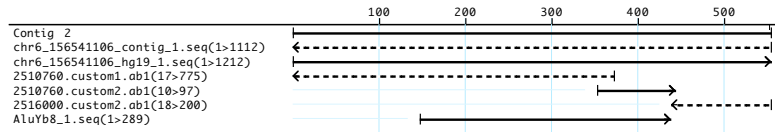

C.

not genotyped

siteID: chr6\_156541106  
 sample sequenced: HGDP00711  
 Alu subfamily: AluYb8

B.

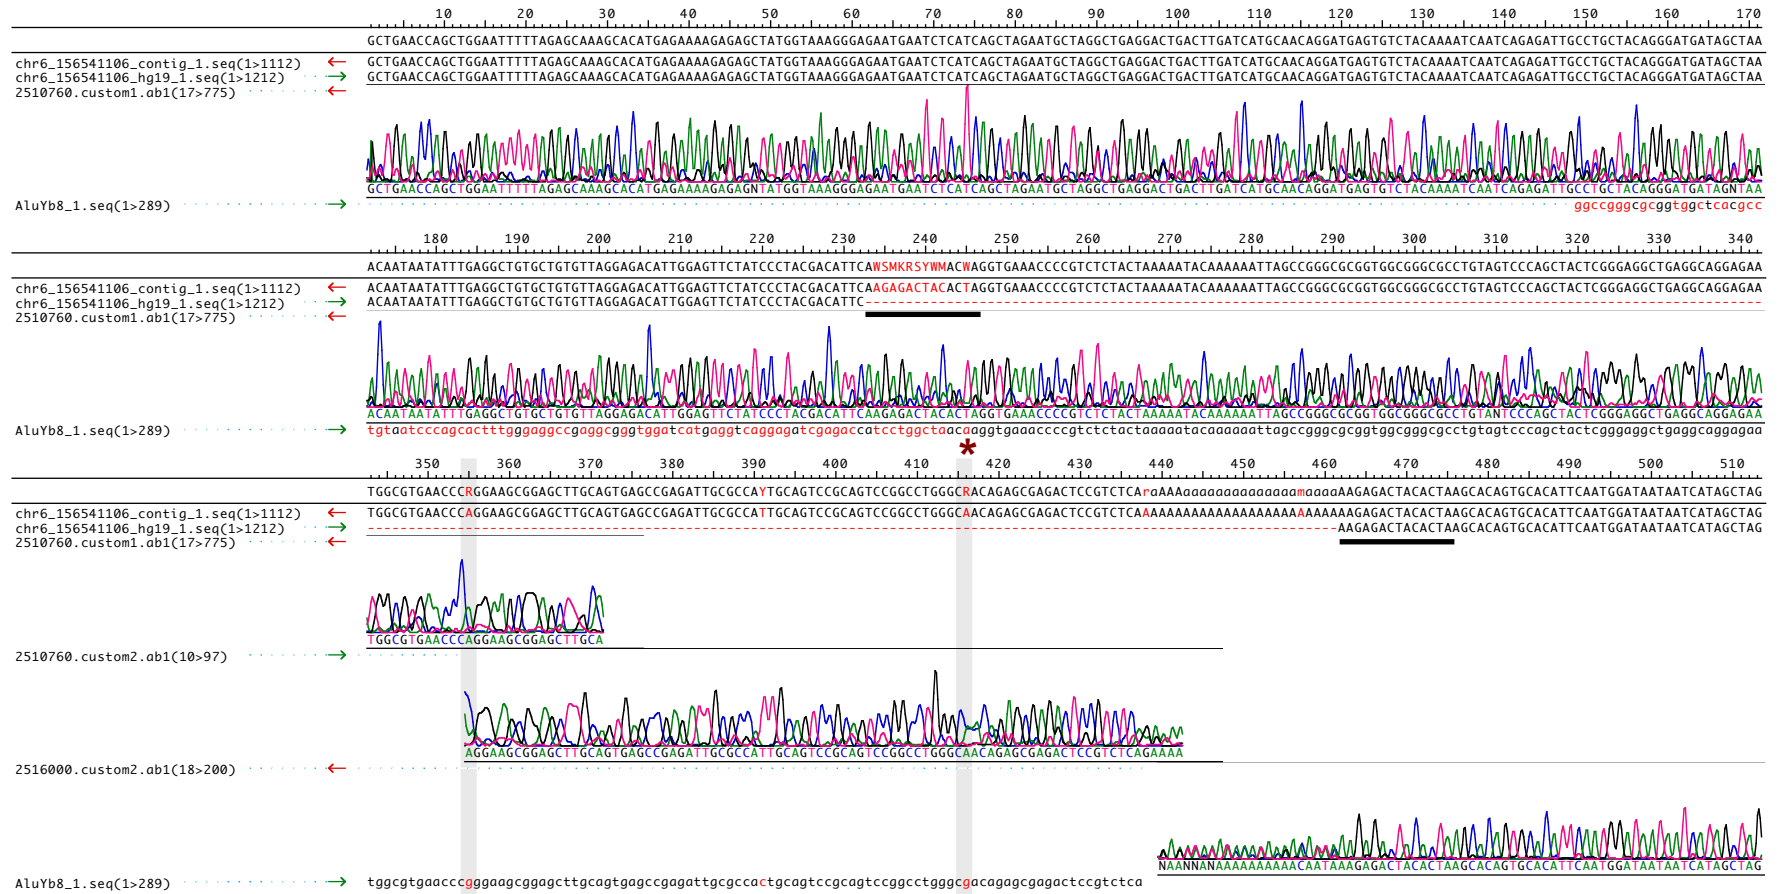

Figure S4.17

A.

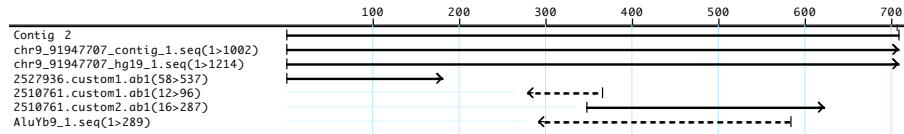

C.

not genotyped

siteID: chr9\_91947707  
 sample sequenced: HGDP00992  
 Alu subfamily: AluYb9

B.

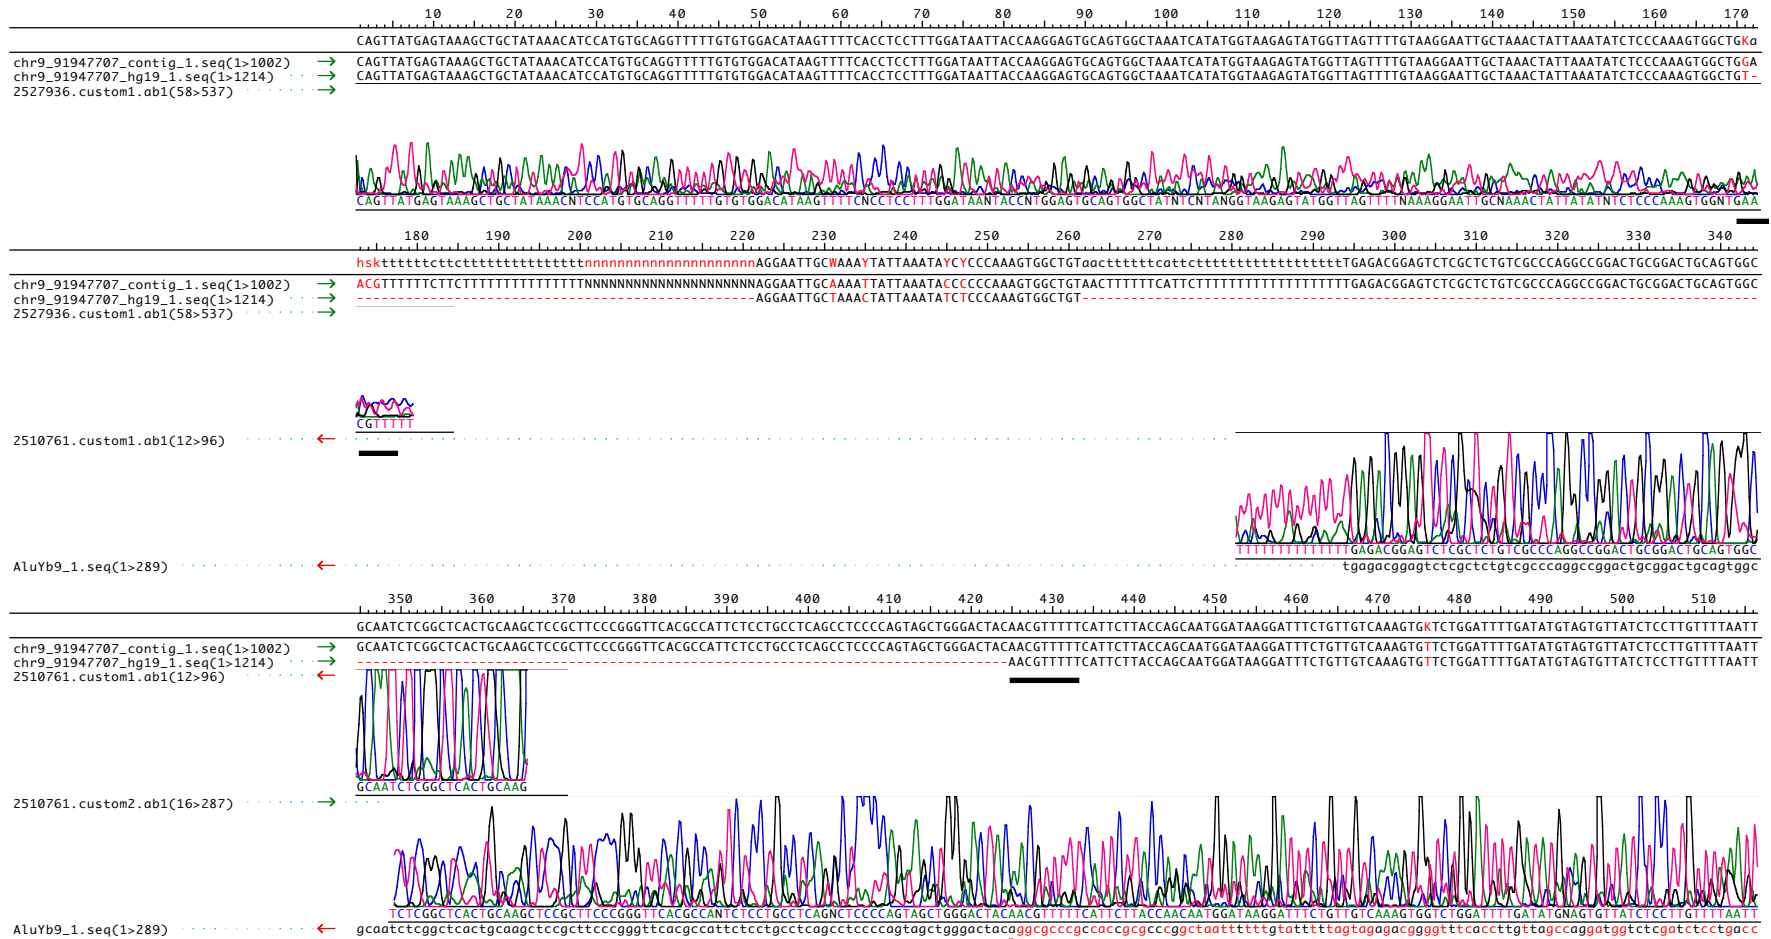

Figure S4.18

A.

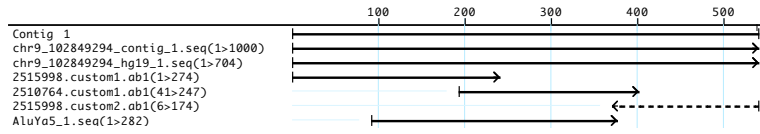

C.

not genotyped

siteID: chr9\_102849294  
 sample sequenced: HGDP00456  
 Alu subfamily: unclassified

B.

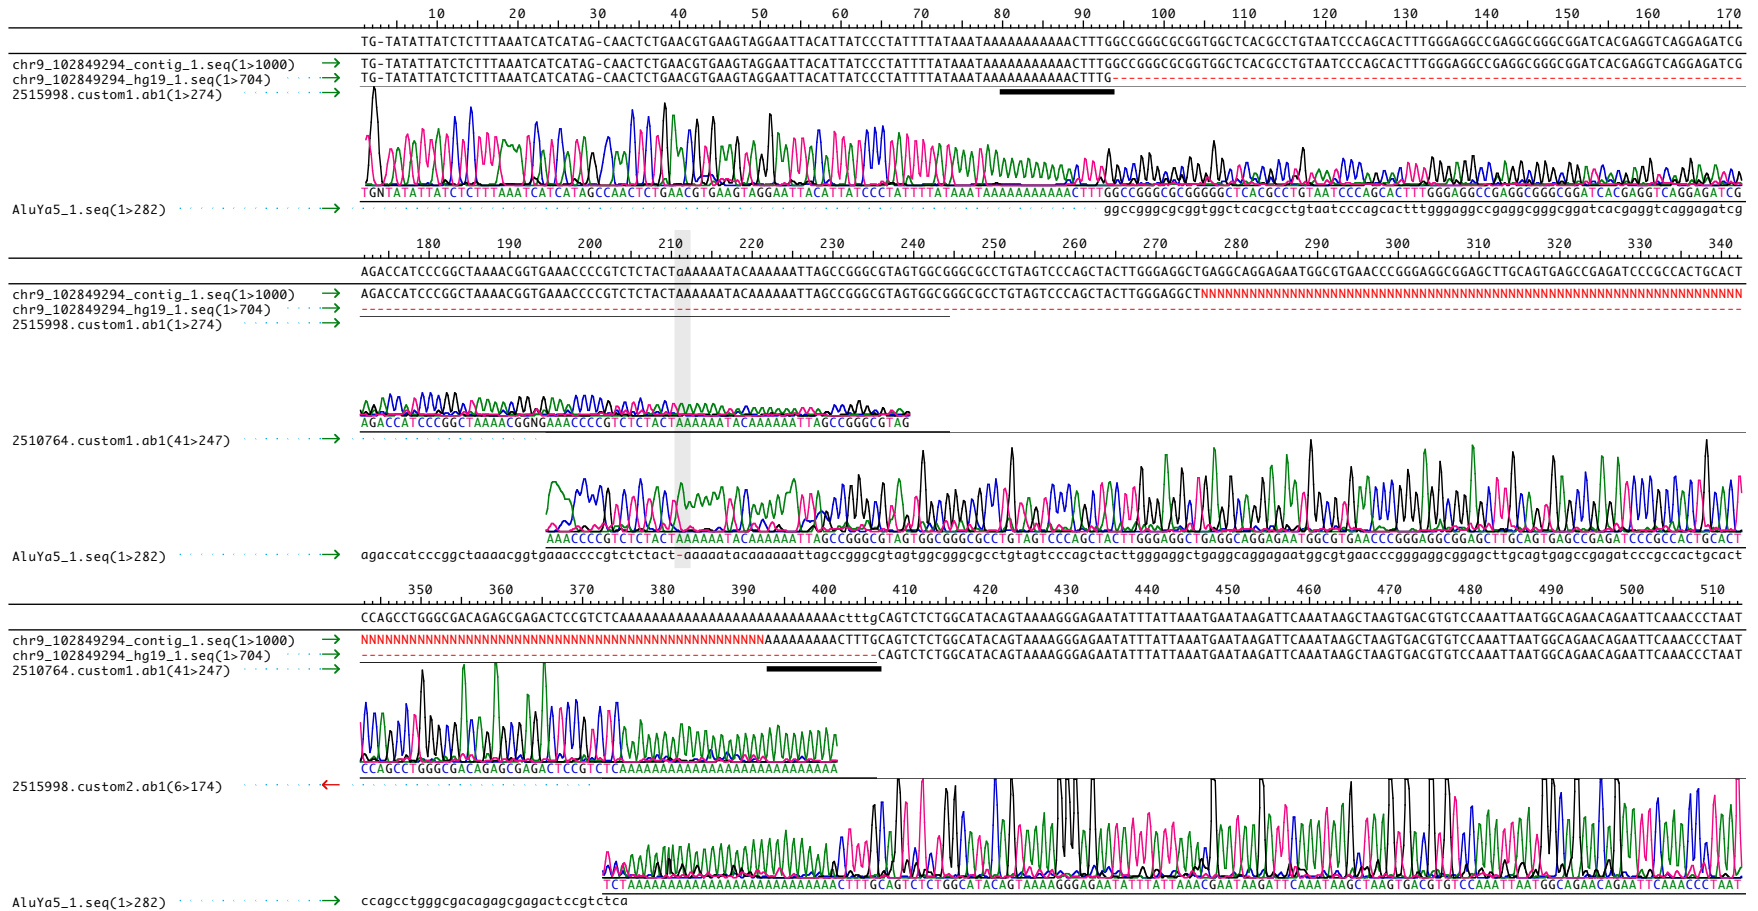

Figure S4.19

A.

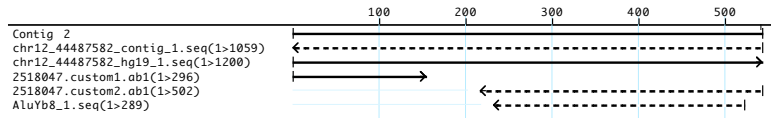

B.

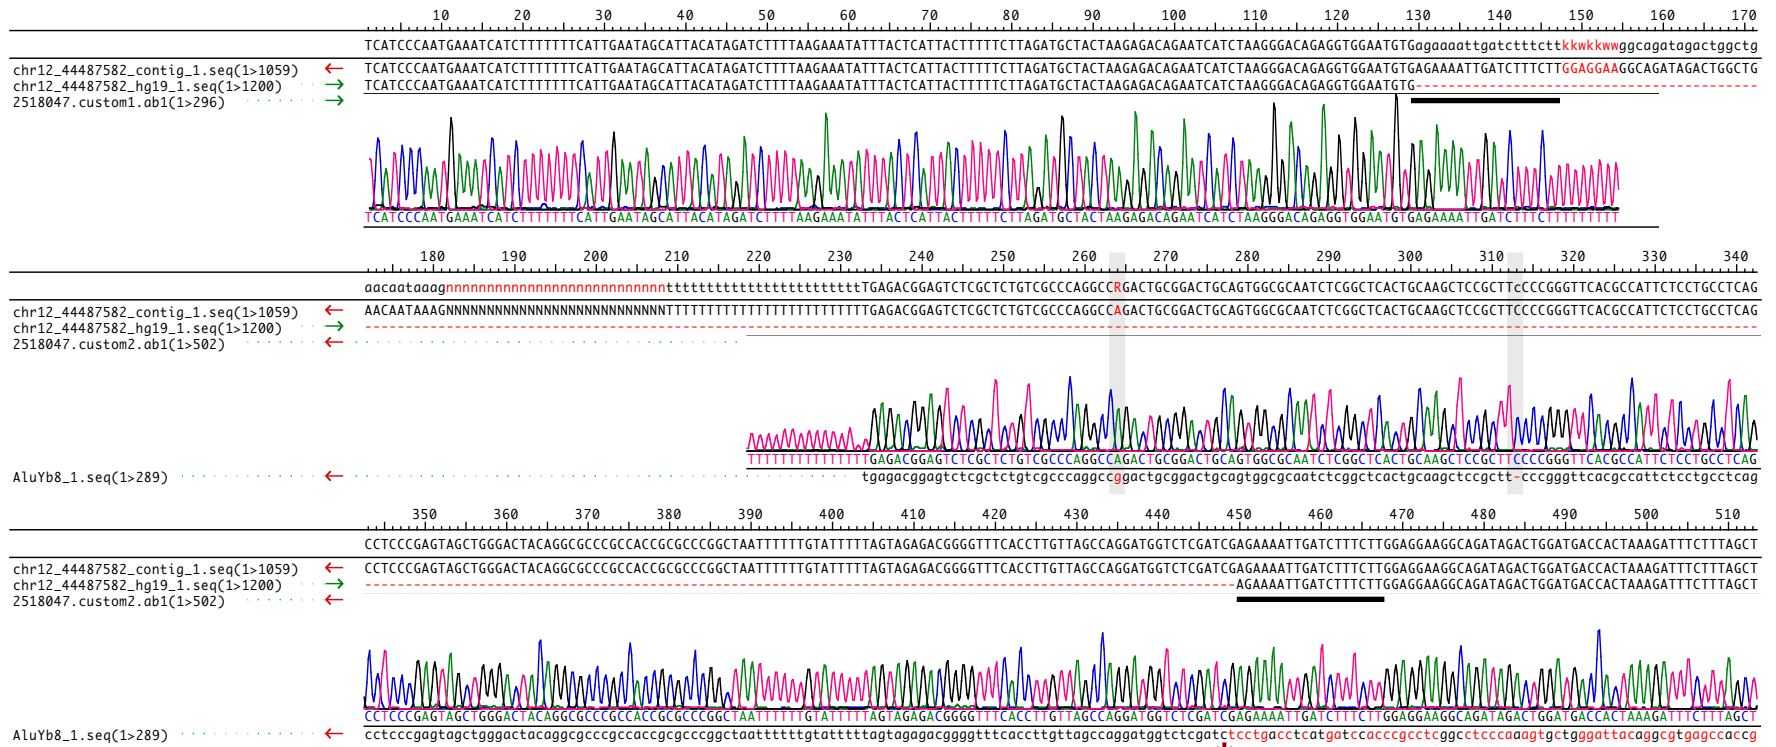

C.

not genotyped

siteID: chr12\_44487582  
 sample sequenced: HGDP00471  
 Alu subfamily: AluYb8

Figure S4.20
