# Supplementary material for: Discovery and characterization of Alu repeat sequences via precise local read assembly
Source: PubMed Central journal article supplement (PMC4666360; doi:10.1093/nar/gkv1089), 2015-10-25
Supplement: supp_gkv1089_nar-01397-h-2015-File011.pdf [file supp_gkv1089_nar-01397-h-2015-File011.pdf]

A.

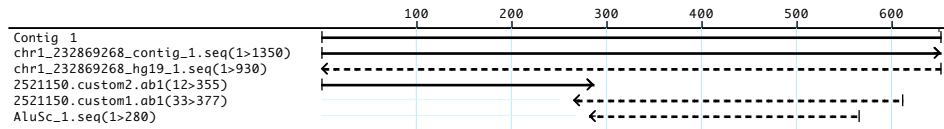

C.

genotyped

siteID: chr1\_232869268  
 sample sequenced: HGDP00476  
 Alu subfamily: AluSc  
 percent divergence: 11.0%

B.

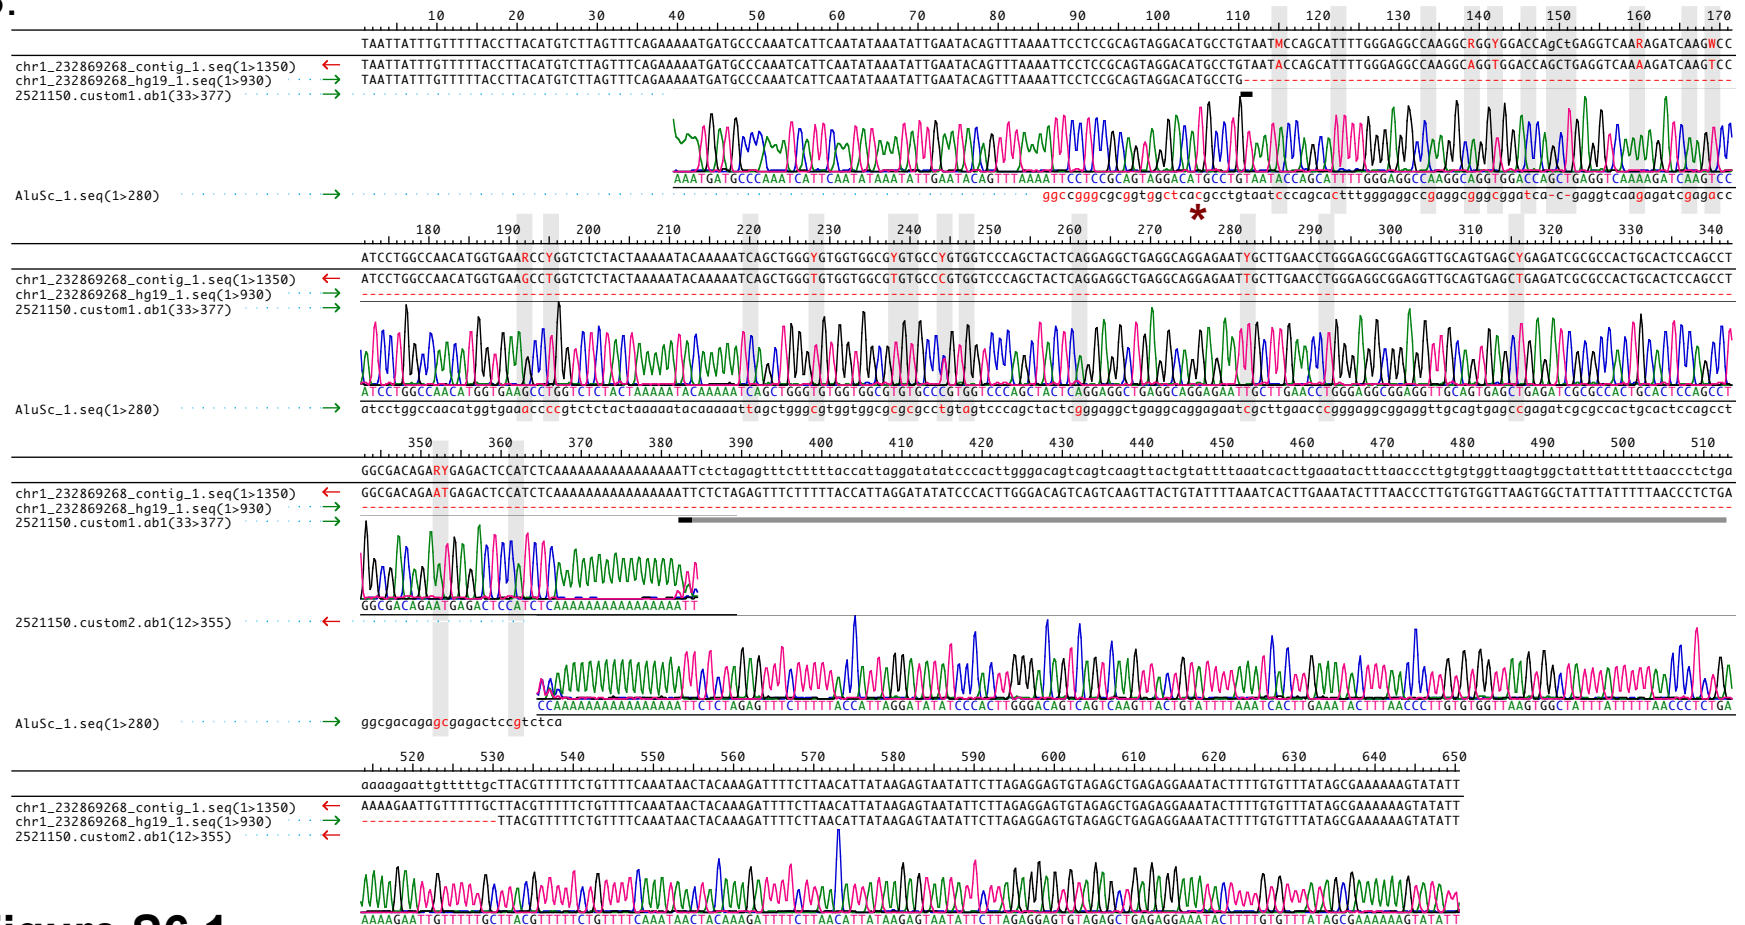

Figure S6.1

A.

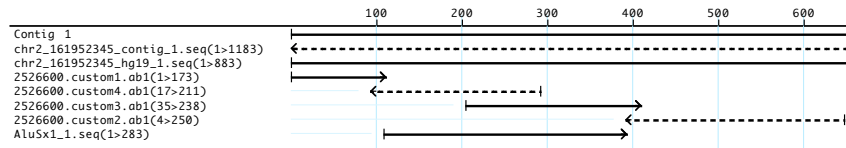

C.

genotyped

siteID: chr2\_161952345  
 sample sequenced: HGDP00854  
 Alu subfamily: AluSx1  
 percent divergence: 11.6%

B.

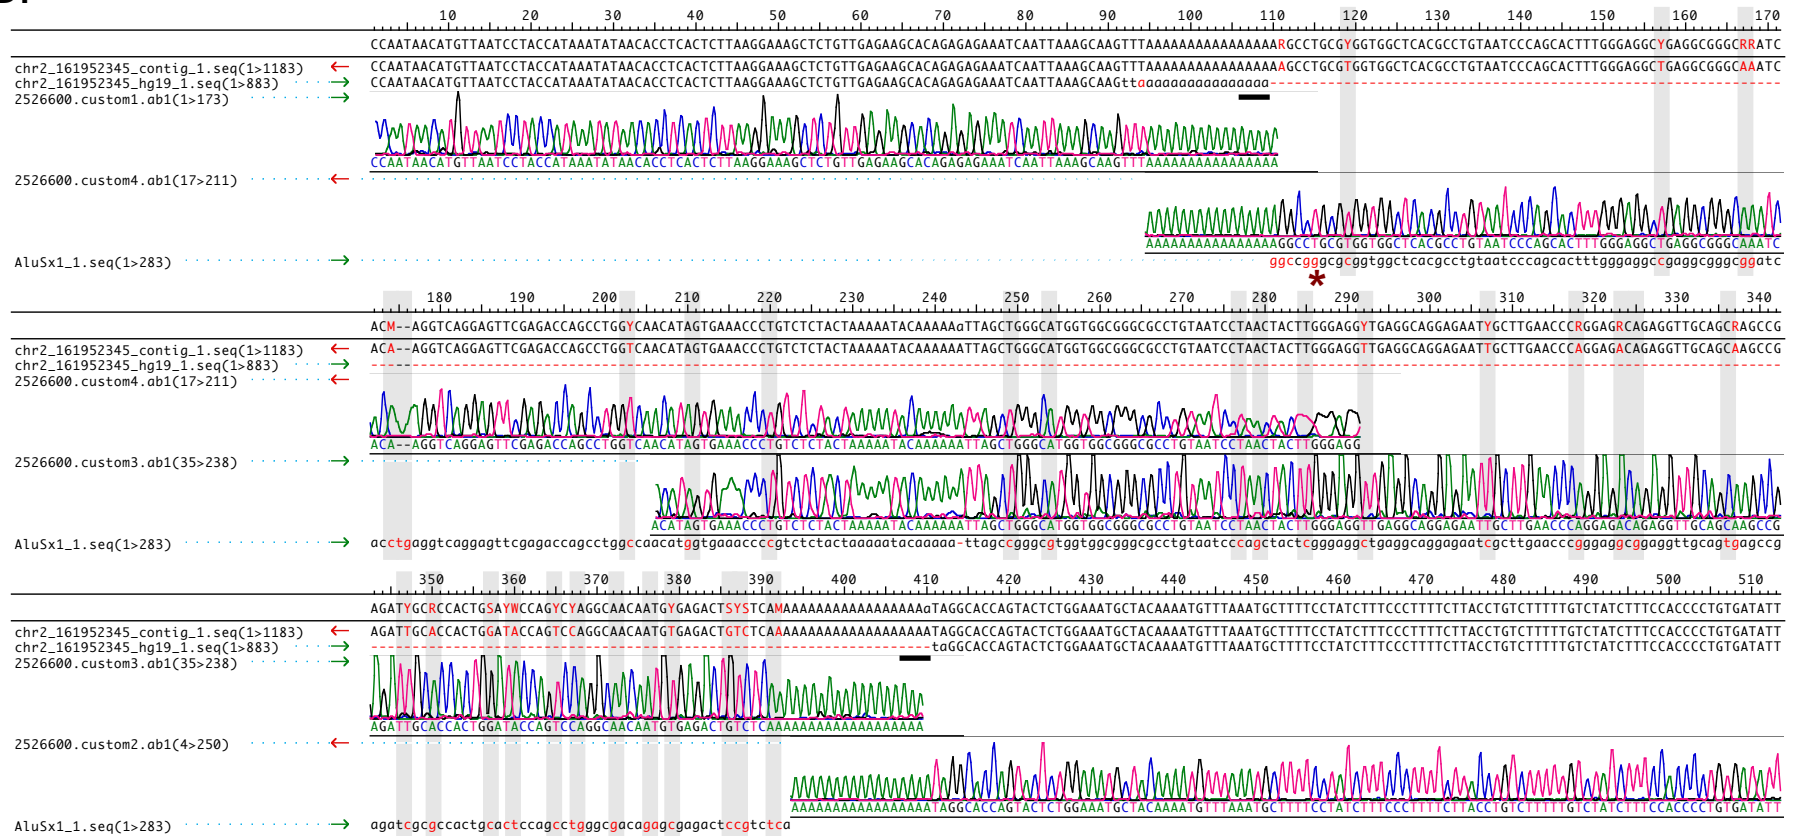

Figure S6.2

A.

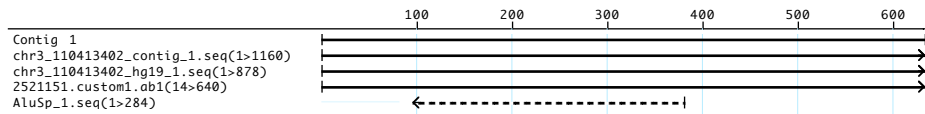

C.

genotyped

siteID: chr3\_110413402  
 sample sequenced: HGDP00711  
 Alu subfamily: AluSp  
 percent divergence: 11.2%

B.

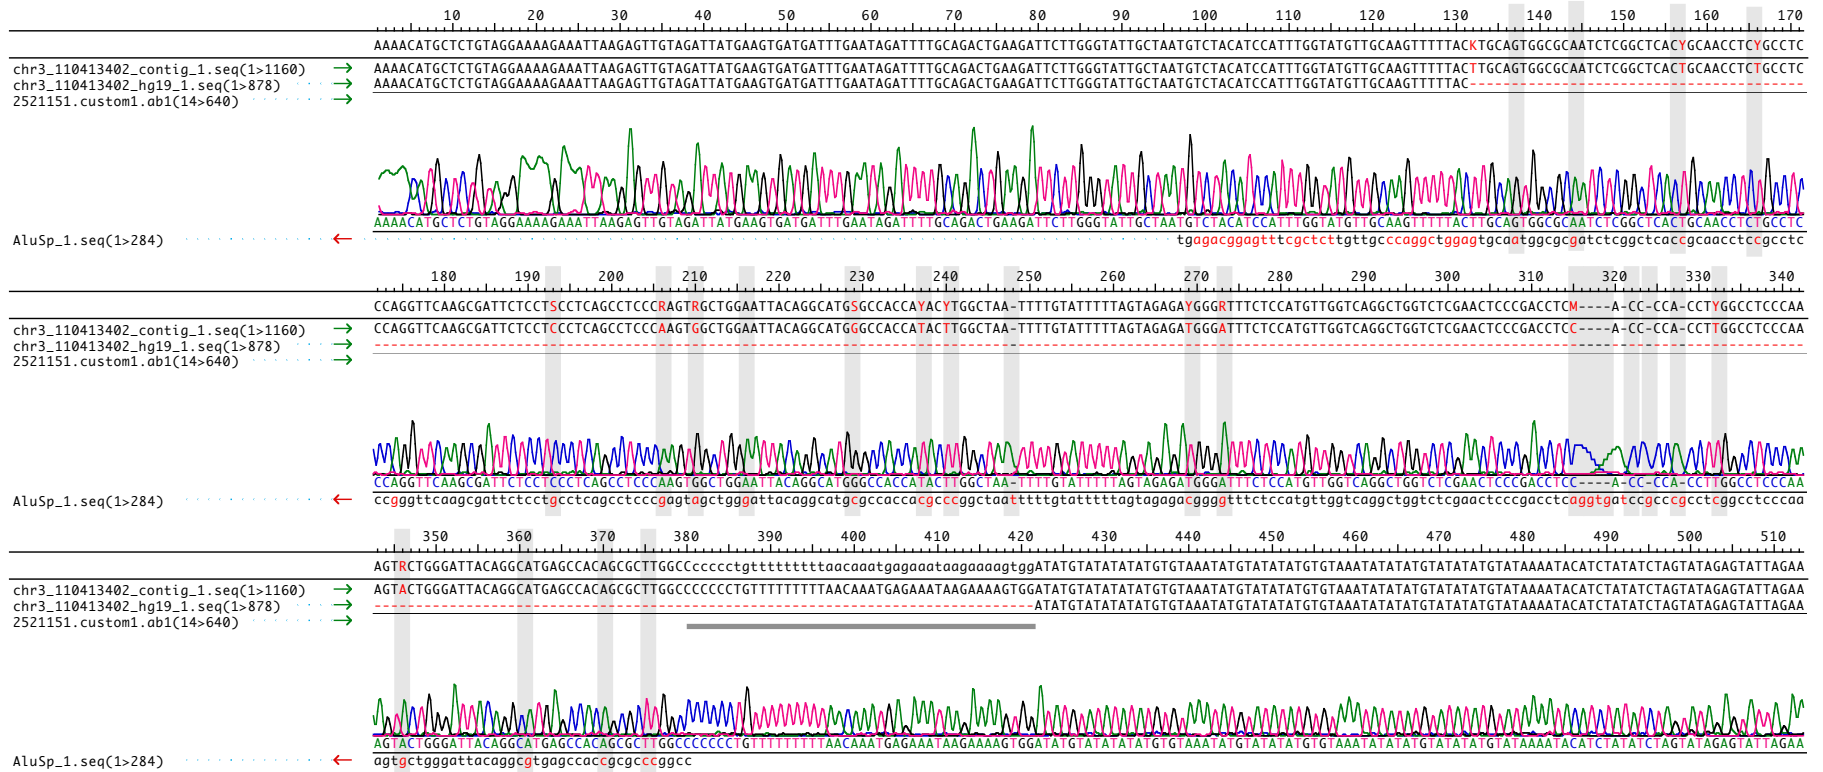

Figure S6.3



A.

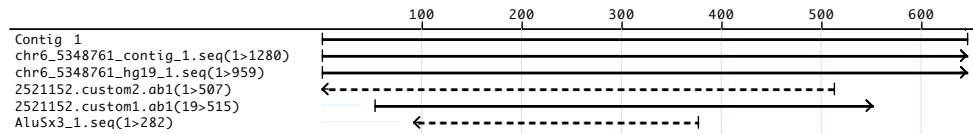

C.

genotyped

siteID: chr6\_5348761  
 sample sequenced: HGDP00456  
 Alu subfamily: AluSx3  
 percent divergence: 13.9%

B.

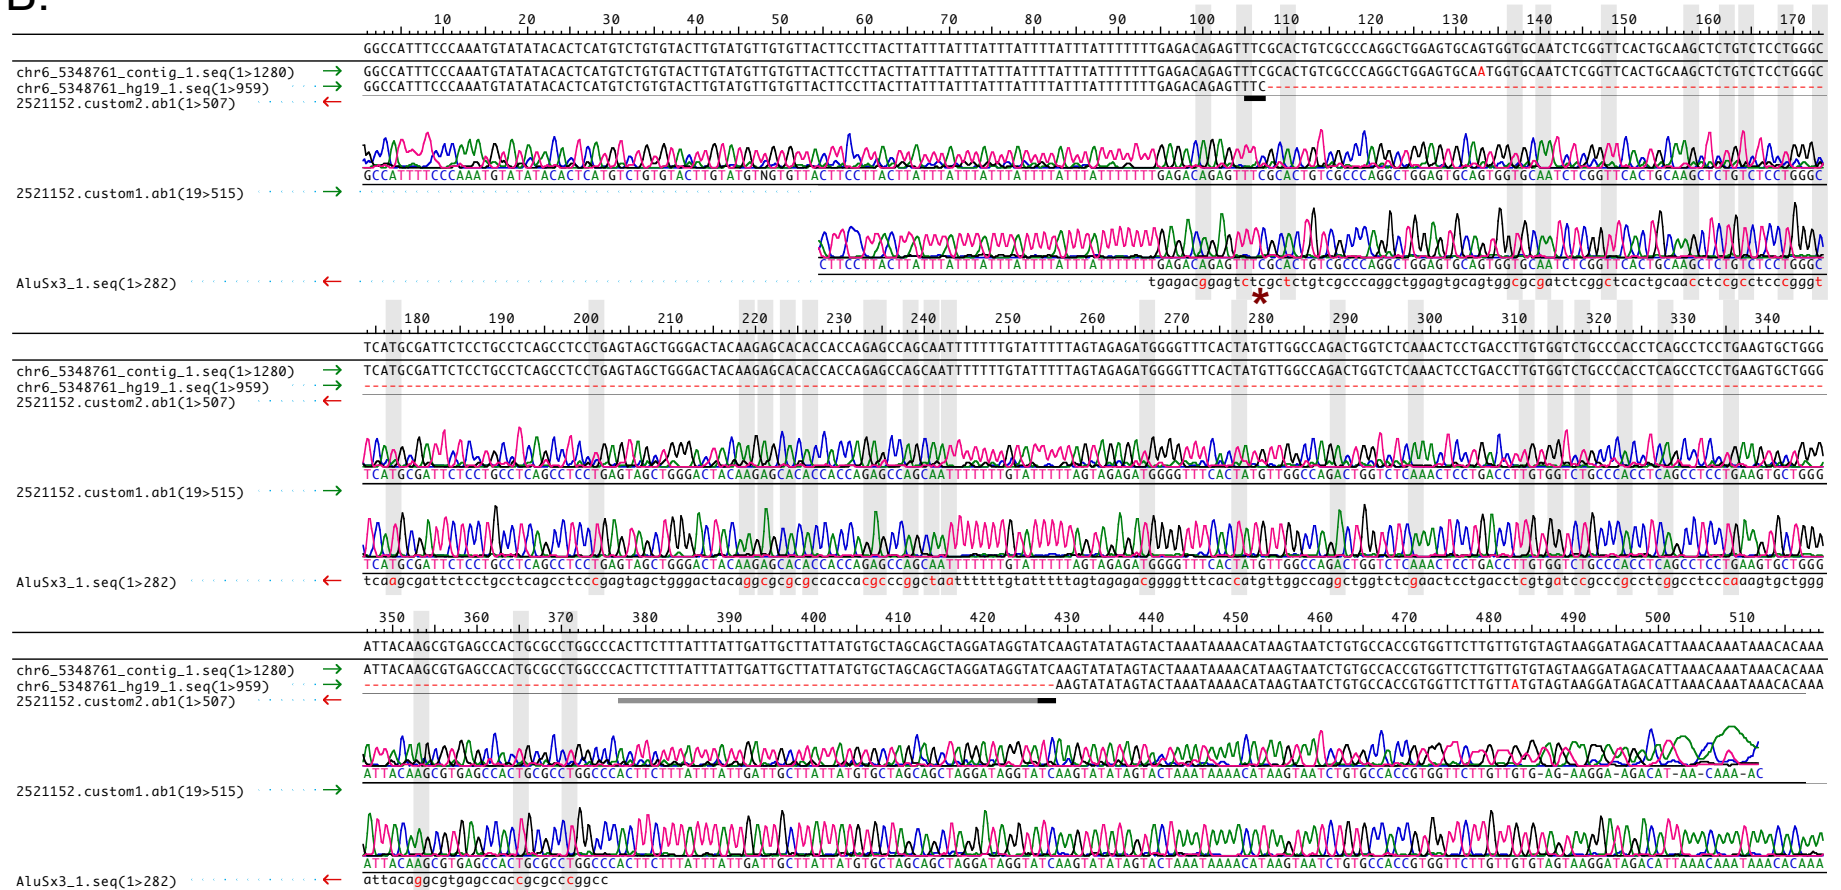

Figure S6.5

A.

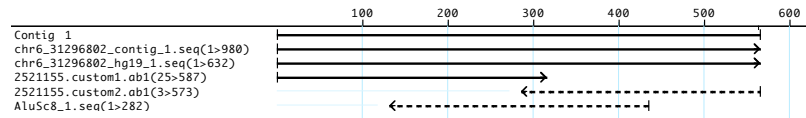

C.

genotyped

siteID: chr6\_31296802  
 sample sequenced: HGDP00232  
 Alu subfamily: AluSc8  
 percent divergence: 9.8%

B.

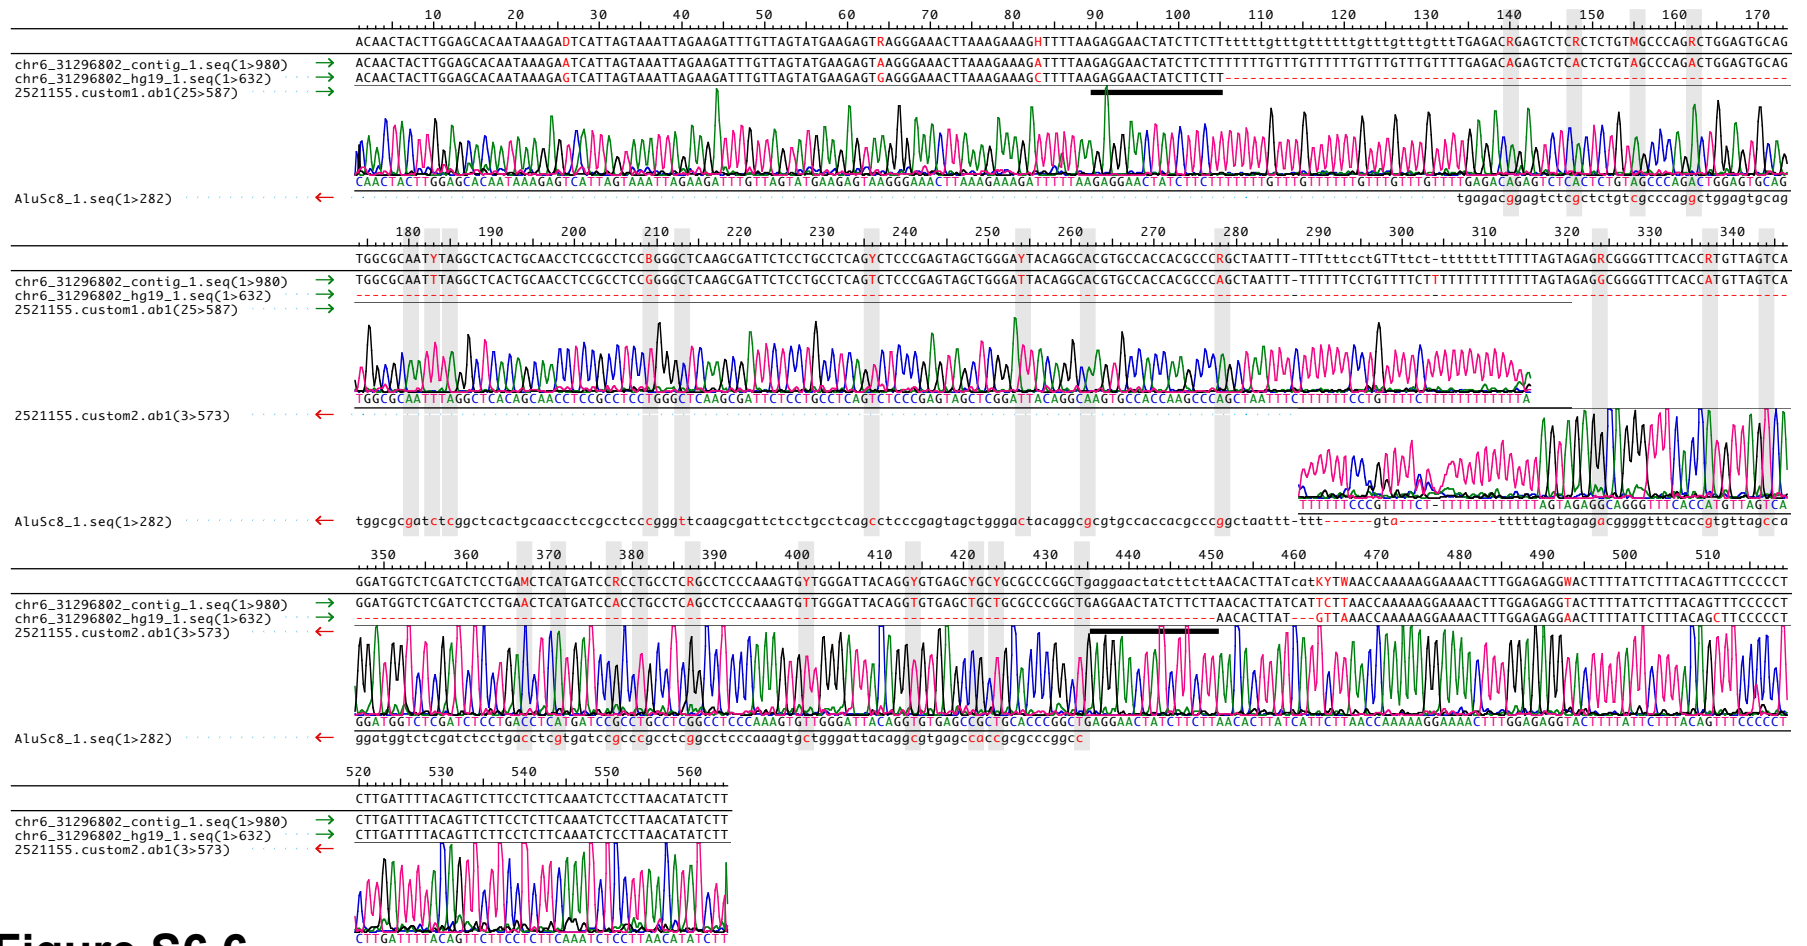

Figure S6.6

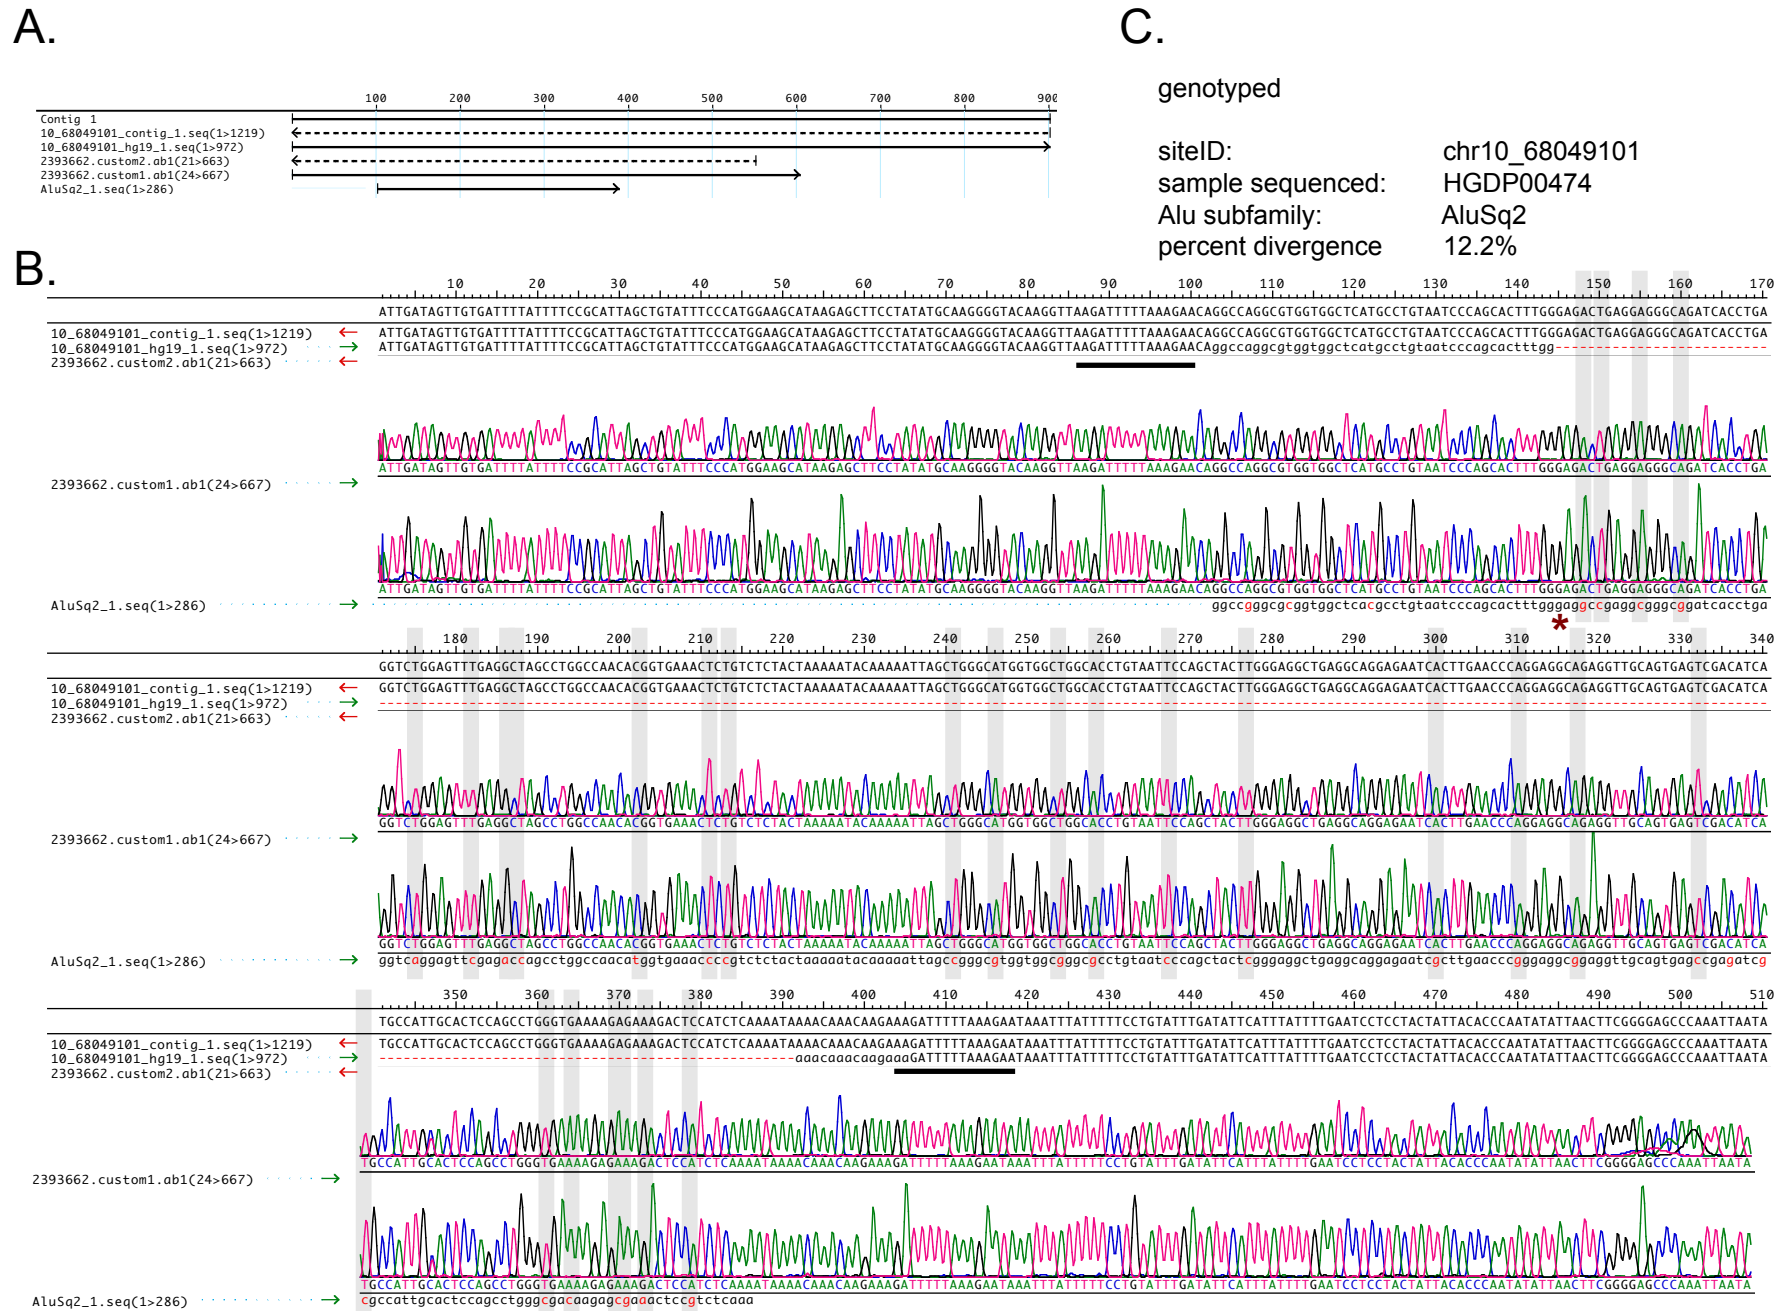

**Figure S6.7**

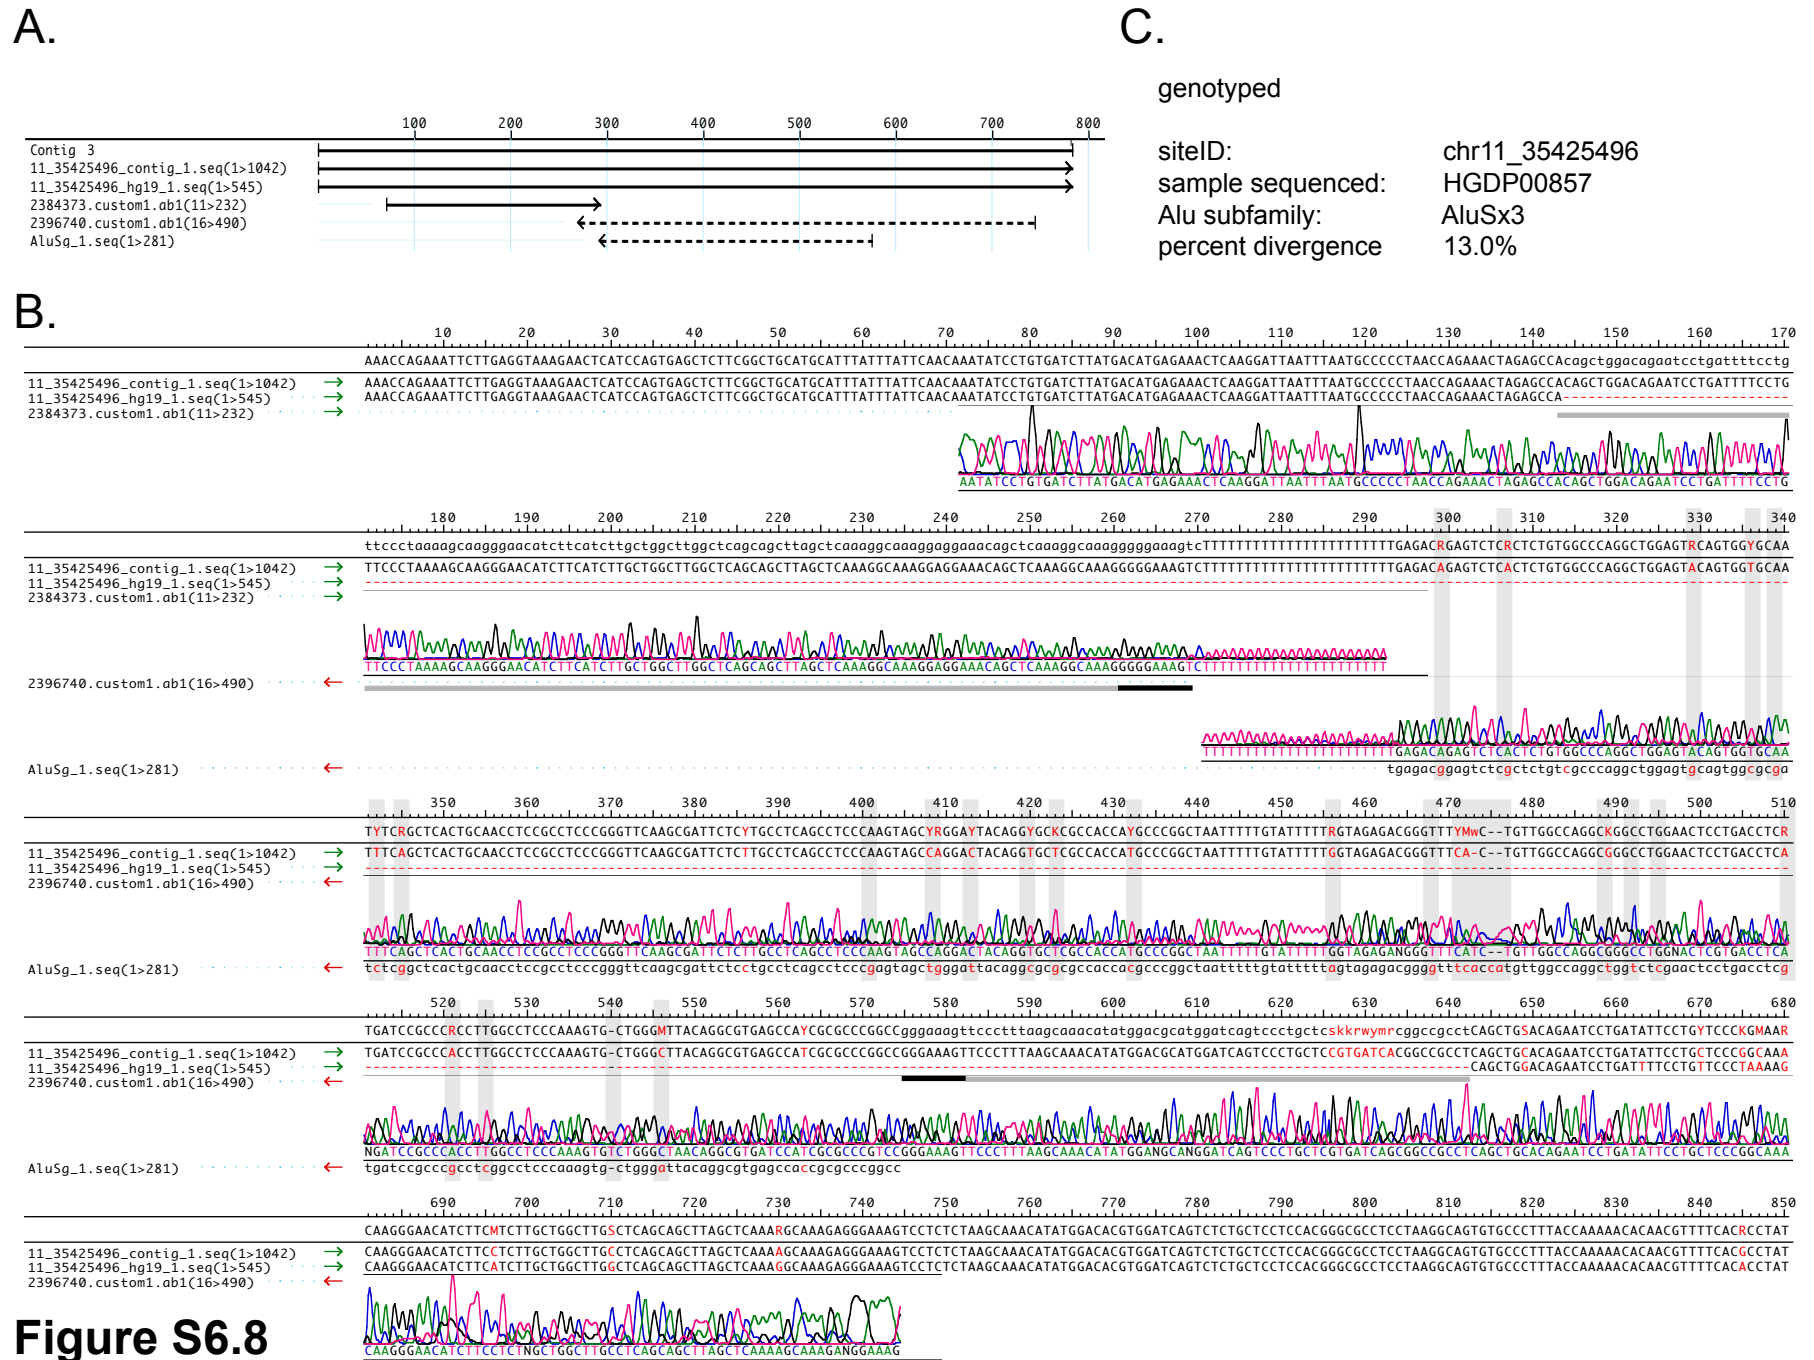

**Figure S6.8**



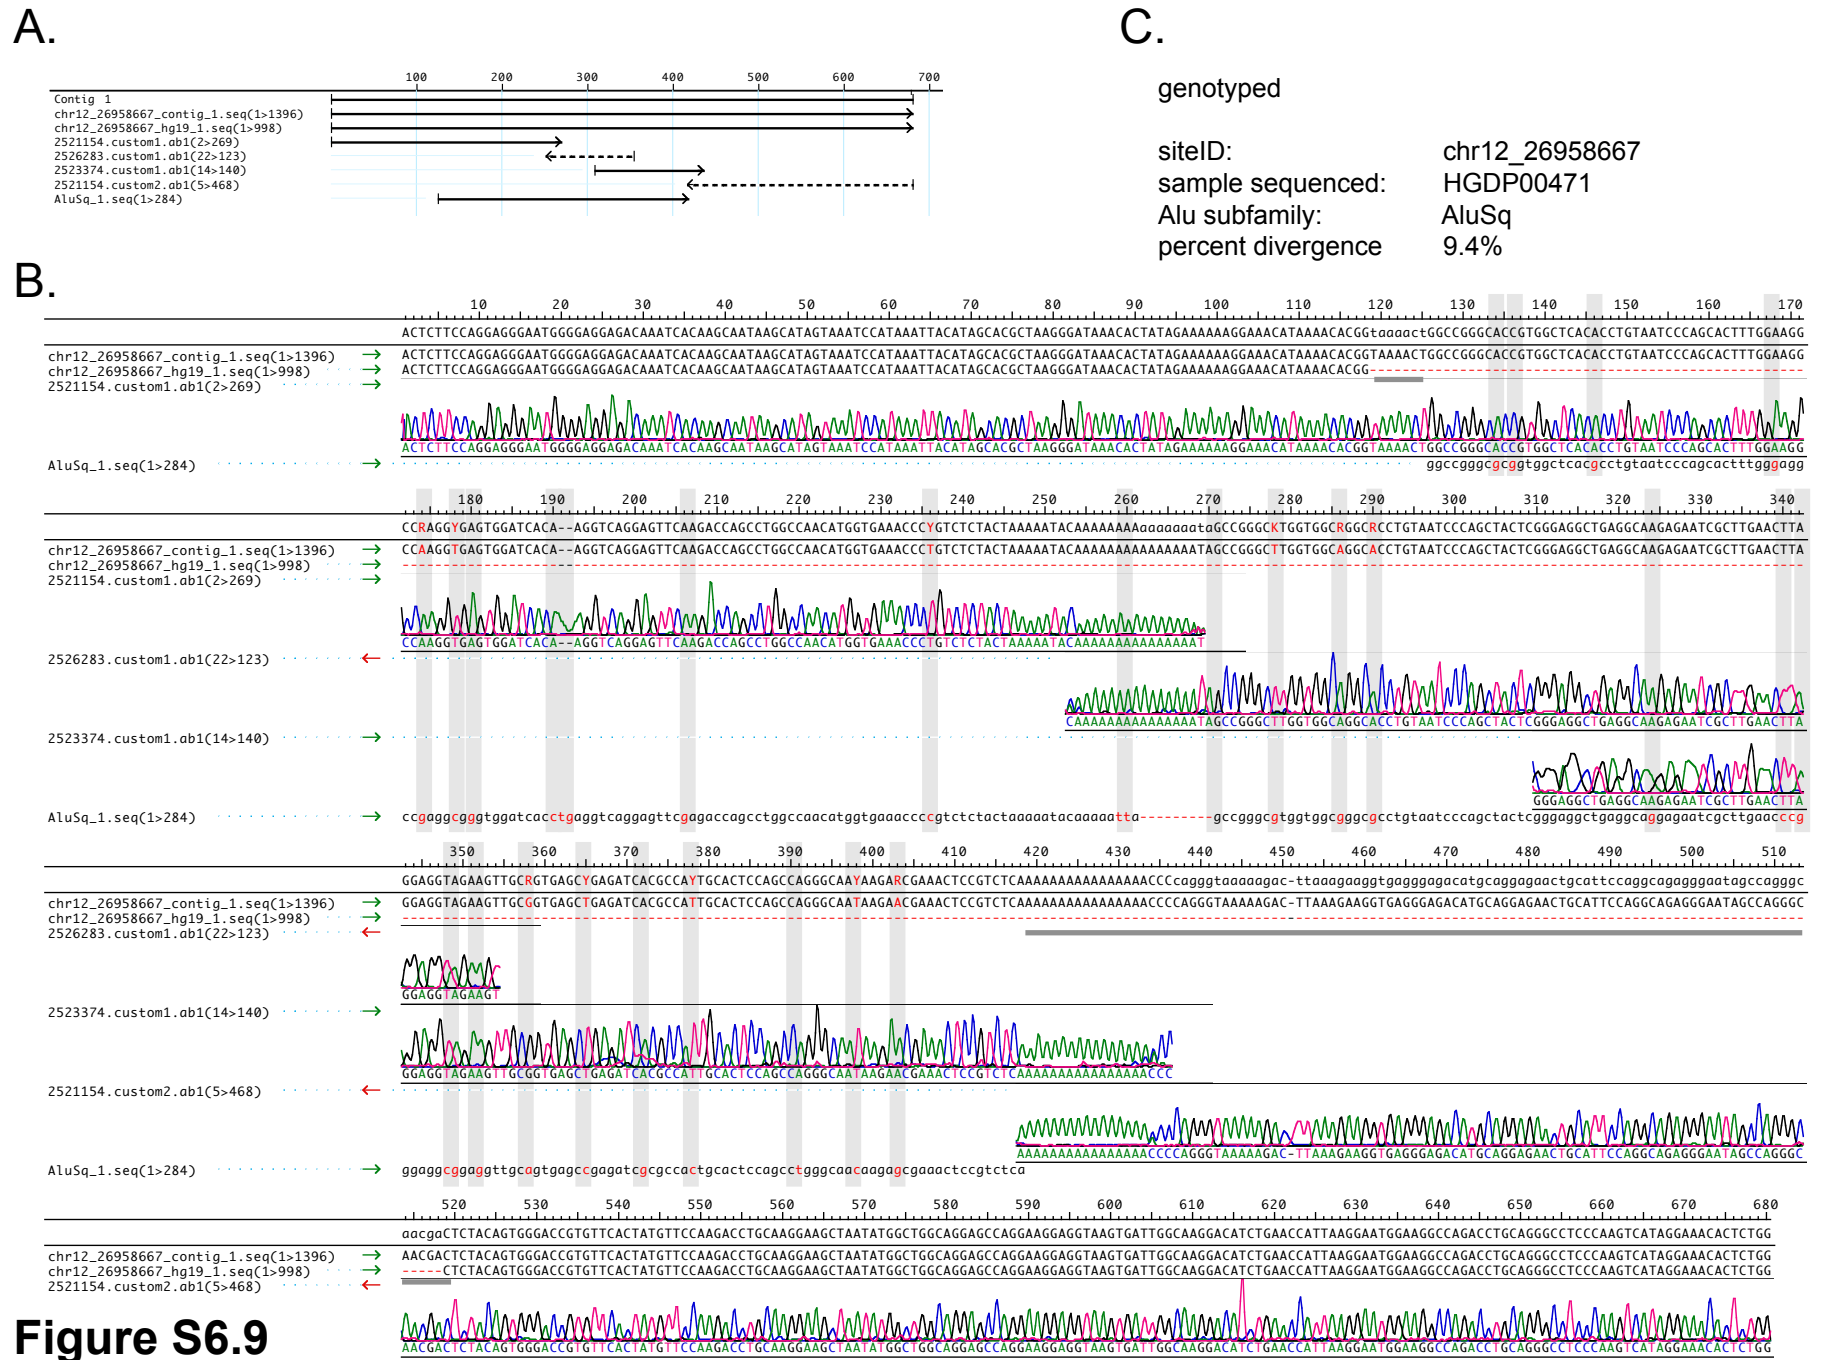

A.

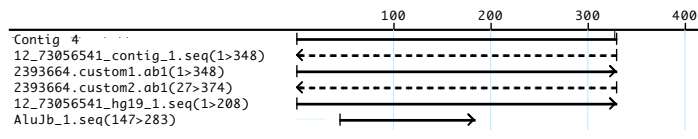

C.

not genotyped

siteID: chr12\_73056541  
 sample sequenced: HGDP00987  
 Alu subfamily: AluJb  
 percent divergence: 14.2%

B.

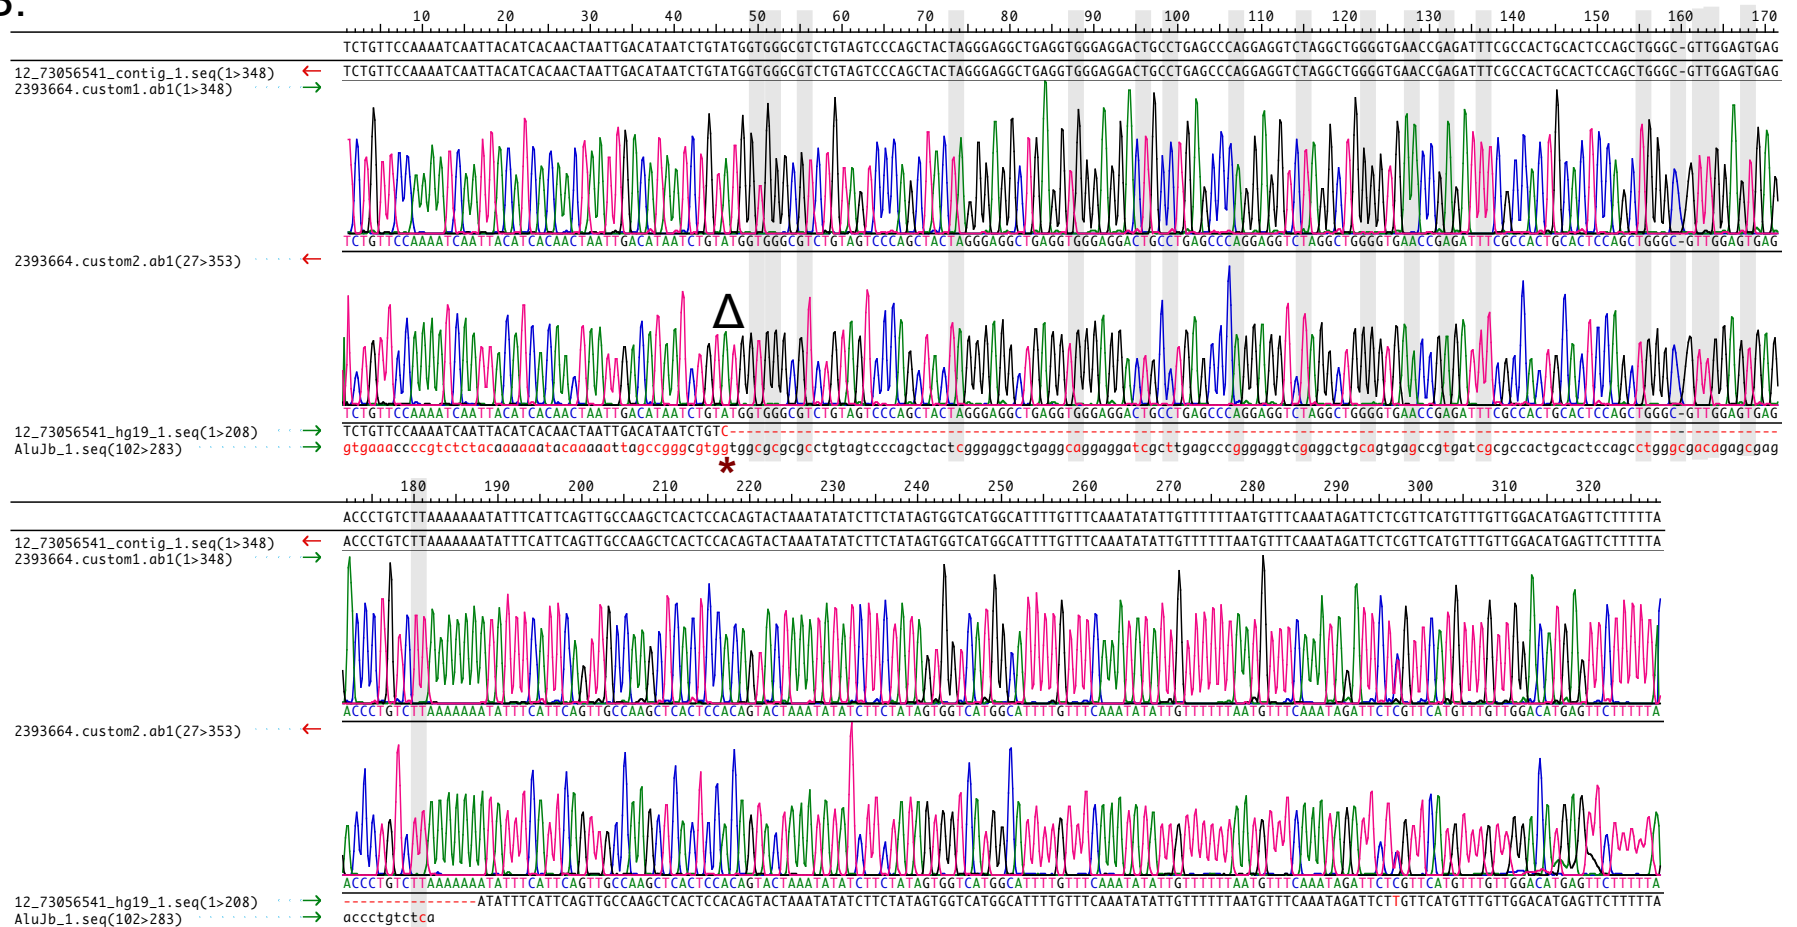

Figure S6.10



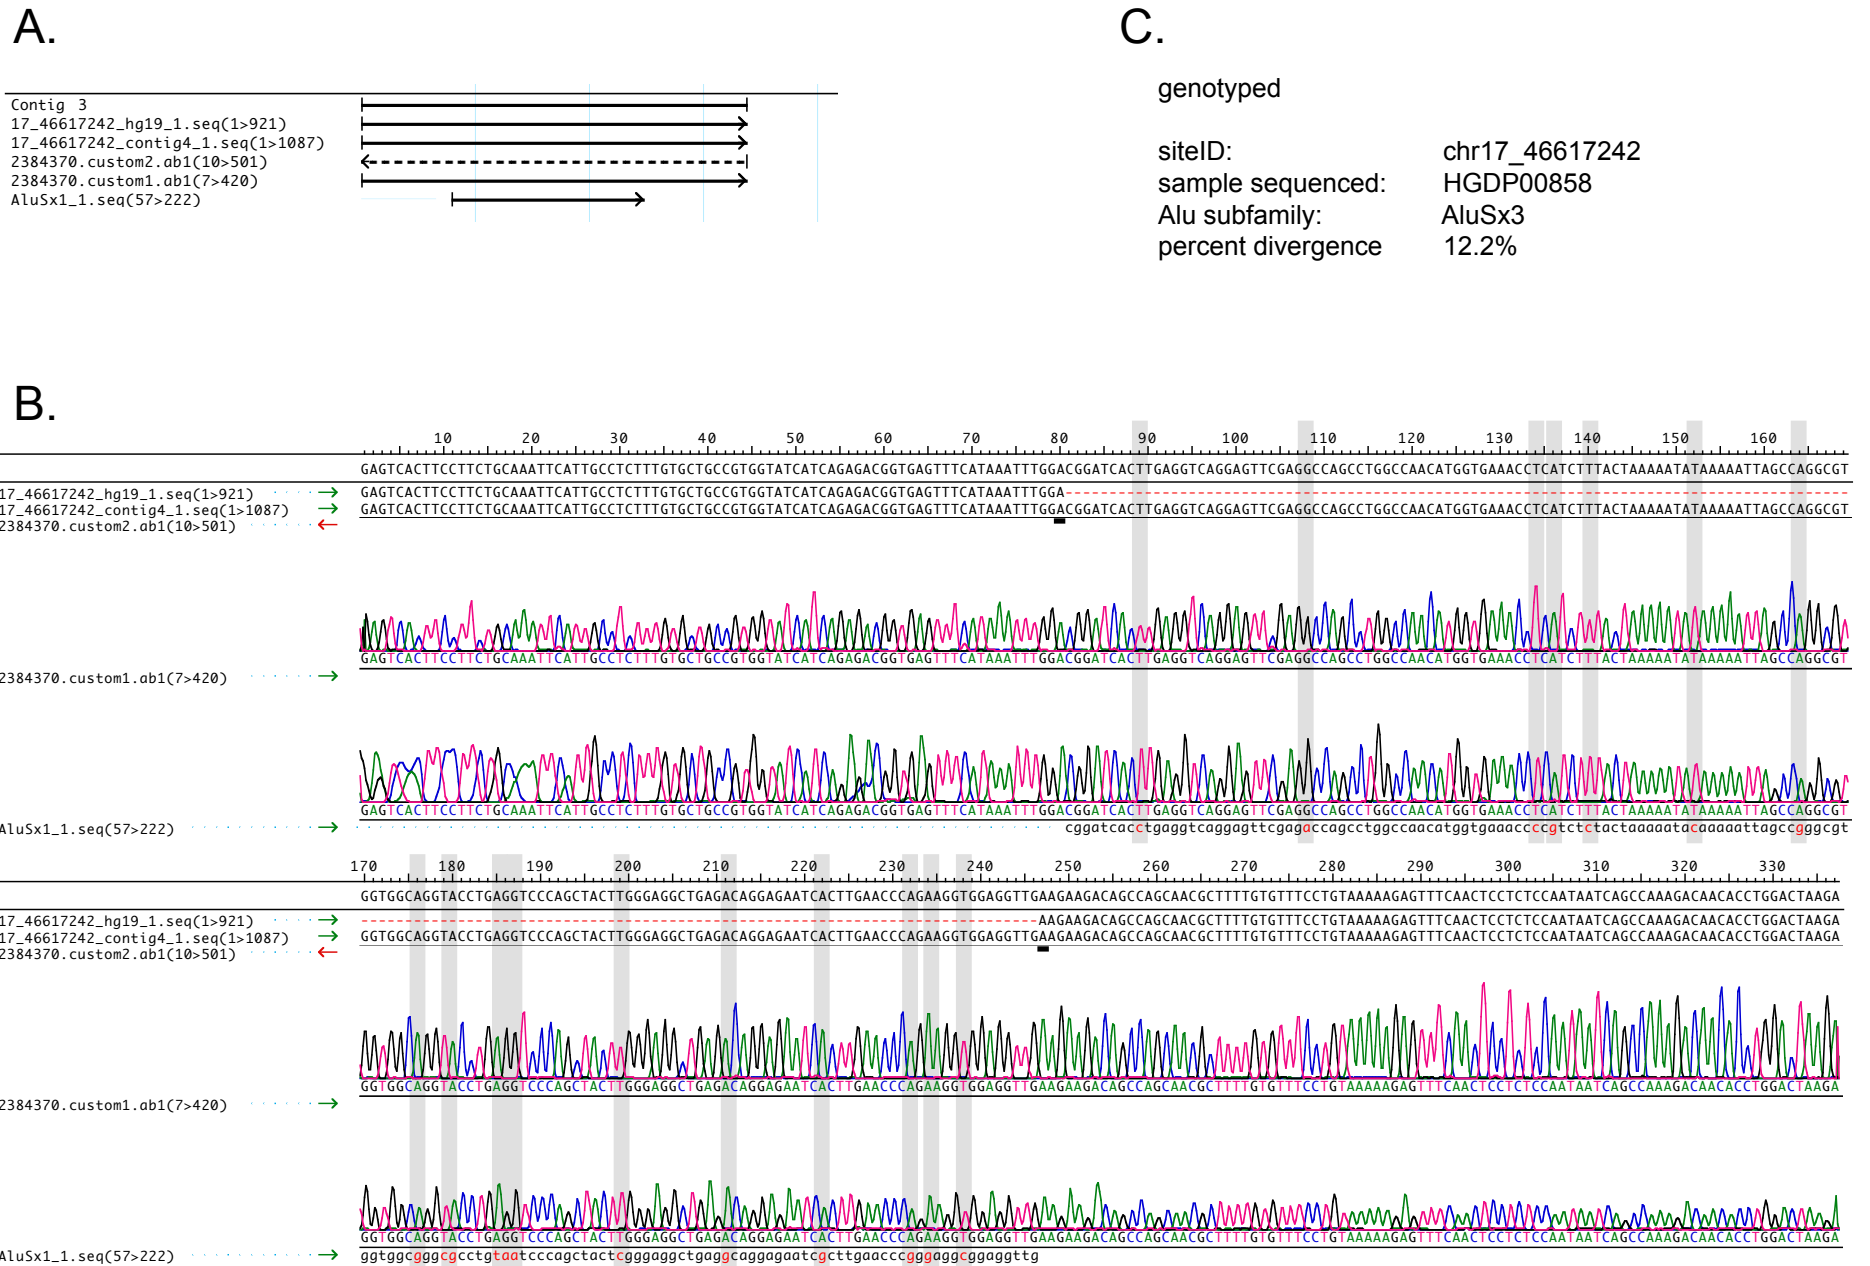

**Figure S6.12**
