# Supplementary material for: Discovery and characterization of Alu repeat sequences via precise local read assembly
Source: PubMed Central journal article supplement (PMC4666360; doi:10.1093/nar/gkv1089), 2015-10-25
Supplement: supp_gkv1089_nar-01397-h-2015-File014.pdf [file supp_gkv1089_nar-01397-h-2015-File014.pdf]

siteID: chr11\_35425496

Yellow : matches to reference hg19 based on blat

Light blue: indel rs371417146, A → GAGGAAACAGCTCAAAGGCAAAGG

Purple: AluSx

Red: Additional sequence

Bold Green: Region of similarity

Bold Underline: Candidate Target Site Duplication

!<br><hg19\_dna\_range=chr11:35425003-35425797

CTGGTAAGAGGATTTTCATGCAAGCCTGCACATGTGTGGCTGCCCTGTAGGACTGGCTACATAATGT<br>GTGGGTCTGCACGTAATTTGGGCAAAATGAAATCTTGAGACCCCTTGTTCAAATTAACATTTCAA<br>GATGATAAGAGCAGAGCATTAAACCGTGGACTGCCTAAGTCGCATATCCATAAAGCAGGTCCTGCT<br>TCCCAGGGTTTCTATGTTTATGCCCAAATAATCTAAGATTGTCTTGAAGGAGAAACCAGAAATTCT<br>TGAGGTAAAGAACTCATCCAGTGAGCTCTTCGGCTGCATGCATTTATTTATTCAACAAATATCCTG<br>TGATCTTATGACATGAGAACTCAAGGATTAATTTAATGCCCCCTAACCCAGAACTAGAGCCACAG<br>CTGGACAGAATCCTGATTTTCCTGTTCCCTAAAAGCAAGGGAACATCTTCATCTTGCTGGCTTGGC<br>TCAGCAGCTTAGCTCAAAGGCAAAGAGGGAAAGTCCTCTCTAAGCAAACATATGGACACGTGGATC<br>AGTCTCTGCTCCTCCACGGCGCCTCCTAAGGCAGTGTGCCCTTTACCAAAAACACAACGTTTTTCA<br>CACCTATTTTAAATTTTGTTGCTTGCTTCCCATTGGGTAAAAGCTAGACTTTGGGGTGCTGGTA<br>AGTCATTTTGAAAAGAAATACCTGTTTTCATGCCTCATTCTTGTGTTGTTGATTTTGGGGCCTTT<br>CCAACCCTTTCAAATGTTTTTTCAATCCCTTGAGTGTCTAGGCTTCCTGCTTTTAAGGCCTCCCT<br>TCT

>contig

CTGGTAAGAGGATTTTCATGCAAGCCTGCACATGTGTGGCTGCCCTGTAGGACTGGCTACATAATGT<br>GTGGGTCTGCACGTAATTTGGGCAAAATGAAATCTTGAGACCCCTTGTTCAAATTAACATTTCAA<br>GATGATAAGAGCAGAGCATTAAACCGTGGACTGCCTAAGTCGCATATCCATAAAGCAGGTCCTGCT<br>TCCCAGGGTTTCTATGTTTATGCCCAAATAATCTAAGATTGTCTTGAAGGAGAAACCAGAAATTCT<br>TGAGGTAAAGAACTCATCCAGTGAGCTCTTCGGCTGCATGCATTTATTTATTCAACAAATATCCTG<br>TGATCTTATGACATGAGAACTCAAGGATTAATTTAATGCCCCCTAACCCAGAACTAGAGCCACAG<br>CTGGACAGAATCCTGATTTTCCTGTTCCCTAAAAGCAAGGGAACATCTTCATCTTGCTGGCTTGGC<br>TCAGCAGCTTAGCTCAAAGGCAAAGGAGGAAACAGCTCAAAGGCAAAGGGGGAAAGTCTTTTTTTT<br>TTTTTTTTTTTTTTTGGAGACAGAGTCTCACTCTGTGGCCAGGCTGGAGTACAGTGGTGCAATTTT<br>AGCTCACTGCAACCTCCGCCTCCCGGGTTCAAGCGATTCTCTTGCCCTCAGCCTCCCAAGTAGCCAG<br>GACTACAGGTGCTCGCCACCATGCCCAGCTAATTTTGTATTTTGGTAGAGACGGGTTTCACTGT<br>TGGCCAGGCGGGCCTGGAACCTGACCTCATGATCCGCCACCTTGGCCTCCCAAAGTGCTGGGC<br>TTACAGGCGTGAGCCATCGCGCCCGGCCGGGAAAGTTCCTTTAAGCAAACATATGGACGCATGGA<br>TCAGTCCCTGCTCCGTGATCACGGCCGCCTCAGCTGCACAGAATCCTGATATTCTGCTCCCGGCA<br>AACAAGGGAACATCTTCCTCTTGCTGGCTTGCCCTCAGCAGCTTAGCTCAAAGCAAAGAGGGAAAG<br>TCCTCTCTAAGCAAACATATGGACACGTGGATCAGTCTCTGCTCCTCCACGGGCGCCTCCTAAGGC<br>AGTGTGCCCTTTACCAAAAACACAACGTTTTCACGCCTATTTTAAATTTTGTGCTTGCTTCCCATT<br>GGGTAAAAGCTAGACTTTGCGGGTGGCTGGTAAGTCATTTTGAAAAGACAAATACCTGTTTTCAT<br>GCCTCCATTCTTGTGTTGTTGATTTTGGGGCCTTTCCAACCCTTTCAAATGTATTTTCAATCCCT<br>TGAGTGTCTAGGCTTCCTGCTTTTAAGGCCTCCCTTCT

Alignment (89.5% identity)

CAGCTGGACAGAATCCTGATTTTCCTGTTCCCTAAAAGCAAGGGAACATC<br>||||| ||||| ||||| ||||| ||| || ||| ||||| |||||<br>CAGCTGCACAGAATCCTGATATTCTGCTCCCGGCAAACAAGGGAACATC<br>TTCATCTTGCTGGCTTGGCTCAGCAGCTTAGCTCAAAGGCAAAGA<br>||| ||||| ||||| ||||| ||||| |||||<br>TTCCTCTTGCTGGCTTGCCCTCAGCAGCTTAGCTCAAAGCAAAGA
